# Supplementary material for: Microarray Detection Call Methodology as a Means to Identify and Compare Transcripts Expressed within Syncytial Cells from Soybean (Glycine max) Roots Undergoing Resistant and Susceptible Reactions to the Soybean Cyst Nematode (Heterodera glycines)
Source: Hindawi journal article supplement (doi:10.1155/2010/491217), 2010-01-01
Supplement: f3 [file 491217.f3.xls]

## Sheet: Sheet1
Probe Set ID	Representative Public ID	At Gene ID	At BLAST E-value	Functional Category	Subfamily	Gene Family	Sequence
GmaAffx.36227.1.A1_at	BU551398	At3g03050	3e-72	Cell Growth & Division			AGTTTGCTGATCTCTATATTGTGAAATGGACATCCCTTATGATTCCACCTATCACAATTATGATGGTCAACTTAATAGCAATAGCAGTTGGAGTAAGCAGAACCATATACAGTGTCATACCACAGTGGAGCCGTCTACTAGGTGGTGTTTTCTTCAGTTTTTGGGTCTTGGCTCATCTCTATCCCTTTGCAAAAGGTTTGATGGGAAGAAGAGGGAGGACACCTACCATAGTTTTTGTGTGGTCAGGCCTCATAGCAATCACAATTTCTCTCCTCTGGGTGGCTATCAACCCCCCTGCTGGTACTGACCAAATTGG
Gma.5418.2.S1_at	BI469627	At4g39350	2e-85	Cell Growth & Division			AGTCATTGTTGGTGTCTCAGATGCCATAAACAATGGCTATGATTCATGGGGTCCTTTGTTTGGGAGGCTNNTTTTTGCCCTTTGGGTCATTGTCCACCTTTACCCTTTCCTCAAGGGTGTCATGGGAAAACAAGAAGGTGTTCCTACCATCATTTTGGTTTGGGCTATTCTTCTGGCTTCCATATTGACACTACTTTGGGTGAGAATCAACCCATTCTTGGCCAAAAATGATGTGGTGCTGGAAATTTGTGGATTGAATTGTGACTAAAGGTAACAAAAAATGGAAGAAGGGCATGCTTTGATGTTTTACACAGATAAGGTCTGCAACATGCATAAATTTTTGGTCAGAGGCACATGACAGATCCCTGAATGCAGAGTAGTATCTGTTGGTGAGAGCTA…
Gma.10206.1.S1_at	BU082029	At2g21770	1e-83	Cell Growth & Division			GAATGCCAACCATTATATTGGTTTGGTCAATCCTTCTGGCCTCCATCTTGACTCTCATGTGGGTCAGAATTAACCCGTTTGTGTCAAGAGACGGCCCCGTGTTAGAAATTTGTGGATTGAATTGTGACGAGTCTTGAATAAAGAAAAGCTGAAGAAGAAGGTTAGTTATTTTTCAGCTACACTGCAGTCATGTTGAAGAATGTAGCACATCATGCTTCACAAAGTTGCACGAATTTTCGGATGGAAGTTTTATTTTTCGGGTGTGTAGAGATT
GmaAffx.89786.1.A1_s_at	CK605840		1.1e-24	Cell Growth & Division			CTCCACGGCCAGCTTCTTAGAGGGACTATGGCCGCTTAGGCCACGGAAGTTTGAGGCAATAACAGGTCTGTGATGCCCTTAGATGTTCTGGGCCGCACGCGCGCTACACTGATGTATTCAACGAGTCTATAGCCTTGGCCGACAGGTCCGGGTAATTTTTGAAATTTCATCGTGATGGGGATAGATCATTGCAATTGTTGGTCTTCAACGAGGAATTCCTA
GmaAffx.89786.1.S1_at	CK605840		1.1e-24	Cell Growth & Division			TCCTTACTATGTCTGGACCTGGTAAGTTTCCCCGTGCTGAGTCAAATTAAGCCGCAGGCTCCACTCCTGGTGGTGCCCTTCCGTCAATTCCTTTAAGTTTCAGCCTTGCGACCATACTCCCCCCGGAACCCAAAGACTTTGATTTCTCATAAGGTGCCAGCGGAGTCCTAAAAGCAACATCCGCTGATCCCTGGTNGGCATCGTTTATGGTTGAGACTAGGACGGTATCTGATCGTCTTCGAGCCCCCAACTTTCGTTCTTGATTAATGAAAACATCCTTGGCAAATGCTTTCGCAGTTGTTCGTCTTTCATAAATCCAAGAATTTCACCTCTGACTATGAAATACGAATGCCCCCGACTGTCCCTGTTAATCATTA
Gma.44.1.S1_at	L38856.1	At2g19480	1e-107	Cell Growth & Division			TGACATTGGGTCAACATTAAGAGATAAAATTATCCCTCATGCTGTATCATGGTTTACTGGGGAGGCCGCTCAGGGAGATGAGTTTGAAGACCTGGAGGATGATGAGGACGAAGAGGAAGATGAGGACGAAGATGAGGACGAAGAGGATGACGAGGACGAAGACGATGAAGAGGAGGATGACACTAAGACTAAAAAGAAGAAGAGTGGTAAGGCACAGGCTGGTGATGGTGATGGTGAGCGACCTCCAGAGTGCAAGCAGCAGTAATTGTTTGTTTCTTCGGAGTATCATGTGGCTGATGGGTGTTTTTGAGGTCCTATGGTGCCTGACGGGAAAGTGGGTTTCAATTTCATGCAATTTTTCATAGTCCTTGATTCATTTTCCTCCCTAGAT
Gma.2911.1.S1_at	BM891517	At5g56950	1e-106	Cell Growth & Division			GCAGCAGTAGATGCAGAAGGTCATTTATGTAGTTGTTGAGTTTTGTTGGTGTTCGAGAATGTTTGATGTGAAAGTGGGTTTCATGTTTTAATGCTTCTTAAGTTGATTTTCCTCACTATATCTTGGTAGTTCGAATTTGTTGAGAGTCCCT
GmaAffx.74863.1.S1_s_at	BQ785704	At5g56950	5e-49	Cell Growth & Division			AAAACTCATGTTCTCTCTTGGCAAGAACTAAACTTGGCATACTTTGCATAATAAAGCCACAGGGTAGATTATTCACTAATAAAAAATAAATTTGTGTGTCTTTGTCAACCAAAAATACAAAACTGTATGAATAGGATTTGTTCCAAGTAGATT
Gma.6820.1.S1_at	AI416867	At1g03860	2e-71	Cell Growth & Division			AAAGGGCTGCTAACTTCAATATTGCCCTTGATGATGTGTCAATTACTAGTCTGACTTTTGGCAAGGAGTTTACTGCTGCAATTGAAGCTAAGCAGGTAGNNGNACAAGAAGCTGAGAGGGCTAAATTTGTTGTGGAAAAAGCTGAGCAAGACAAGAGAAGTGCTGTAATTAGAGCACAGGGAGAAGCAAAAAGTGCCCAACTGATTGGGCAAGCTATTGCCAACAATCCAGCTTTTATCACACTGAGGAAGATAGAAGCCGCAAGGGAGATTGCACATACTATATCAAATGCGGCAAACAAGGTTTACCTGAATTCAGATGATCTATTGTTGAATCTTCAAGAGATGAAATTGGAGCCAGGCAGAAAGTGAGTGTGTTAGCCTGTTTGTTTCTTTTTGG…
Gma.431.1.S1_at	CD390728	At2g29570	1e-126	Cell Growth & Division			GAATACTTCTGTGGACAAGCCTGAAGAAGCNACTGTCATTGAGATGAATGAGCCNGTGTCCTTGACATTTGCTTTGCGATATATGAACTCTTTTACAAAGGCAACGCCATTGTCNAACACAGTTACCATTAGTCTNTCAAATGAGNTGCCAGTTGTNGTNGAGTANAAGATTGCTGAGATGGGTTATGTGCGGTTCTATTTGGCTCCCAAGATAGAAGAGGATGAAGAAGATACGAAACCTCAAGTTTAATCTACCTATTAGNNNNNNNGGTTAGGATATTAGGATTTTAATGTCTTTGAACTTGTAGCTTTCGTCATACATCTTCTGTTGAAGATATTTTAACCGTGTGAGCAATGAATTCACATTTTGTGGATTTCTTAGATGTGTATTGGTTACCT…
Gma.5244.2.S1_at	CD415693	At2g32080	4e-63	Cell Growth & Division			TTGTCTTCGAGTCTGATTTGTGTTATTTTATTTTATTTTCCCTCAGCCTCCTTTCTTCTTCTCATATTGTTCTTCCATTAATGCTTTTGAAATAATGCAAACTCTGGTTGGTCAGCAGAATAATTTGAATTGCTTGGCAAGGTTAATATGAATAGGAATAACGGAAGAAAAAAAGGATCAGAGACTTGTACTTGTTTGGATAGTTTGGCACCCAAGCTACAATCTGTAATAATGTTTGATTGTTTATTTTGCGTTCCTTGCACAGATTTCGCATGGATTTAAGTTCTCATGCCTACCATATGTTAGGTTGGTGACTTAACTATTTTGTAGGGTTTGGTTTCCATCTAACAGCATGAACTT
GmaAffx.54397.1.A1_at	CD410704	At1g63160	4e-88	Cell Growth & Division			GTTTTCAAGGTTTGTGACCAGCCACATCCACTGCATGTGAAGAATATGGTGCGTAATGTGATTGAAGGGAATTTTGATGAAGCTTGTTCAGGCCTCAAGCAACTGTATGACTTGGGATATTCCCCCACAGATATCATCACGACACTCTTTCGTATAATAAAAAATTATGATATGGCCGNNTNNCTGANANTNNNNNNNNTGNAGGAAACTGGTTTTGCTCATATGAGAATTTGTGATGGAGTTGGTTCTTATCTTCAGTTGTGTGGTCTATTGGCTAAGCTTTCTCTAGTTCGTGAGACAGCTAAAGCTGTATGAGCTGGTCCTAAGTGCAACTGAGATGTCATTATTTTTAACTTTTCCGATAGTGAAATGTTCTGCTGATGTAGCCTTATATTTTTT…
Gma.5170.1.A1_at	BQ628737	At5g61210	6e-30	Cell Growth & Division			GAAAGGGTAATCACTTGGAGCAAAGAGAGAAGTTGGGGCTGACTTCTGCACCCAAAGGGCAGTCCAAGCTACGGTCCCCACCTCAAGAACCAACAAATGCATTTGAAAAAGTTGAGGTTGAGAAAAATAAGCAAGATGATGCACTATCAGATTTAAGTGATCTGTTGGGAGAGCTTAAAGGCATGGCTGTTGACATGGGATCCGAGATTGAGAGGCATAACAAAGCCCTGAATCATCTCTATGATGATGTGGATGAGTTGAATTTCCGAGTGATAGGTGCTAACCAACGTGGACGTCGTTTGCTCGGAAAANAAGATTGATTGATTTCATCGTTGTGTTTTTCTCTTTGTATCCATCATCTGGTTTAATGAAGACAATCTTTTCATTTAGTTTACACTT…
Gma.2190.2.S1_x_at	BG550828	At3g02230	0	Cell Structure			TTGGGAGTGAAGACTGGCCTTCCATACATCTGGCACAGCAAAGCAAGCAATCCTTTTGTGAATCTCAAAAAGGAGTACAAGGGCATTTTCTGGCAAGAAGAGATCATTCCATTCTTCCAAAGTGCCACCATTCCAAAAGAATGCACTTCTGTCCAAAAATGCTACATTGAACTCTCCAAGCAAGTCAAAGAGAAGCTTGGGGCTGTTGATCCCTACTTCACCAAGCTTGCAGATGCCATGGTGACTTGGATTGAAGCTTGGGATGAGCTTAACAGCACCACATCCGAAGAAGCTTCTT
Gma.2464.1.S1_at	BG839541	At5g15650	0	Cell Structure			AATGGCAAAGCGTGAATCGGTTTTTGGTTAACTGCATAACAGCCACANAACTTGGAANTGGAACTATTTATATACTGTATTTTTTTTCCTTAGTATTTATCTTCAACTTAGCTGTTATTCTCGGCTTAAAATTTGCAGCATTGTTAGCTGTAATTCTGTTTAATAACTTCATCATTTGAGCTTAGAAACAATAAGTACACCCGTAGGGCGTTACTTTCTTTTTATTATTGTTTGATGGGTAGAGATCACATGGCAGCATTTCGTTACATGTGAAATAATAGAAAGGTTATTGATGTATGTCTTGT
Gma.3511.4.S1_s_at	BM526875		1e-17	Cell Structure			GCAGCTTCAAGAGCTTGTCGGCCATGGGCTCATTTGGAAGGATTGC
Gma.10723.1.S1_at	BI700359	At5g48160	0	Cell Structure			CAGAGGCTGATATGTTCCAATTGAAGGCTGATGAGGCTAAACGAGAGGCCGAGAGGCTTCAAATGATTGCTCTTGCCAAGCAAGATAAATCAGAGGAAGAATTTACTAGCAACTACTTGAAACAACGATTAAACGAGGCTGAGGCCGAGAAGCAGTACCTTTATGAAAAGATCAAATTGCAGGAGAGTTCTCGCGCTTCGCAGGGCAGTAGTGGTGGTGACCCCTCTCAGATGCTGATGTATTCCAAAATTCACGATCTGCTTTACAGTGTTCCTTCCAAAGCAGACAGTCAGGGTAATGAGCGCCACCCTTTTCGGACAAATCCCTGAGAGTCCATTGTGTTTGTAATGCCAANTTATGTTAGCTGTTGTAGCTAAGTCACCTTTGA
GmaAffx.12900.1.S1_at	BI969287	At4g30160	1e-165	Cell Structure			CTTGTAGTGTGTATCTTAGAGCTCAAGGGAGCTTCTCTGTTTTTGCAGTGAGGAACTAAACATGTGGAAGTAAAAGGGACAGCATCAGTGTTTTTTTTAGCATAGCTGCATCTGCTCCCAAGAAACTTTTCATGAAGAGAAACTAGAGATTTTCTACCTCTANCCATCTCTTTGCAATGGTTTGAATGTTTAGNGTTATTTCTTTGATGAGTTANCTGCGTGGCATTAATTTTNTTTATAGGGCAGAGTTTGTTTGTGAGCTTGCTTTTNANTTTTTNTTTTTNTNTTTTGGGGACTCATGTTAGTCTTCATTTTATTTTTTTAATTTAAAATTGTTTTGGTAAAGCAATTTGGGTTGCAAATGCGGTCTACTTAGGTTGTATTGATATTGAGGATAAA…
Gma.8077.1.S1_at	BU547877	At3g23730	1e-117	Cell Structure			ATTTCAAAGCCACAGAGTTCTCCACCNNNNNNNNNAATTCCTTCTCTGATGCTGCATGGCAGAGCAACGAGCTTGATGCCTATGGCAGAAGAANACTGAGATGGGCTCAGAAGTACTTCATGATCTATAACTACTGCAACGATCTTAAGCGATTCCCACAAGGCATTCCCGCTGAGTGCAGGCGCTGAGAAATACTATGTTATNATTATTATGTGTCAGTCGGTNNTNNNANNNNNNNATTTTATGTCTTCCTCGGAGCTATTTTTCGTTTCTCTAAG
Gma.1932.1.S1_at	BI970420	At3g05520	1e-109	Cell Structure			GAAAGTAAATACACACAGAACAAATAAAAGTTTGTGTTTACTCGATGGCGACAAGTTCCTCATATATTCACTACATGTCATTTGATCAAGTCAATCATTCTTTGGGTTGACGTTCGTTATATTCACCCATTTGCTTCATGAAGTACCCTCCTTTGTCTGAGTAAGTGAGTATCTTCCACTGATGTACTGTAATTCTTTTTCTTTTTTTTTNACATTATTTGTATAGCAGAAGAGTTCCTATTGTTTCTANCCAATAGCCATATCATCATAACTTCGAAAA
Gma.2245.1.S1_at	CD391149	At3g55430	1e-144	Cell Structure			AGGCAGATGCTAGCAACCAAGCTTTGCAAGCAAACATAAACTATGTGTGCAGCCAAGGAGTTGATTGTAGGCCAATTCAACCAGGAGGAGATTGCTTTGCAGCCAACAACGTTAAGGCTCTTGCCACTTATGCCATGAATGCCTACTACCAGGCCAATGGGCGCCATGATTTCAACTGTGACTTCTCTCAAACTGGTGTTATTACTACTACTAATCCAAGCCATGATAAATGCAAAATCTGAGCATGTTTATTTAAAGGTTATAATCAGAGGCAAGAAAGGAAGATAGAGAAAAGCCCATTGTCATGGTGTCAATGTGGCTTAGTGGTATCTGTGACTCTGAGATTATGCATTCATGTACTCAAAATTATTTAGTTTGTATATTGTTCTGGAAGAAGAA…
Gma.5833.2.S1_s_at	BE801610	At2g18050	2e-25	Cell Structure	Histone		TGTGCCTTGCTGCACAATCTTGAAGAAAGTTGTGTAGTGTAGGATGGTAGATAGTTTAGT
Gma.10479.1.S1_at	CD414847	At1g52740	3e-60	Cell Structure	Histone		AACAAATCTTCGAAGGAATGAGGAAGGTTTATAACTTATAAGTTATTTGAATCNAAGATGAAAATCNCTGTAAATTTAATTATATCTTTTACCTGTGGATAATTTGCCCCTTGCATTATTAGTTTGGTTGAACTAGAACCATCCTTCAAAAGAAATCTGAAAATTTCTGATTTCTTCANNNNAANNNNNNNAANNNANNNNNNNANNNNNNNNNNANNNNANTGNANNTTAGATGATACTGCCTGTCTGTCTAGTCTTTATTGTGGAAG
Gma.17692.1.S1_at	CD393918	At1g52740	9e-57	Cell Structure	Histone		GATTACTGGTGAATGATAGCAGCTTGATGGAAAATTTCTCTACTAATTGTGTATTTGTTGCATGACACTTGAAAAACACAGTAGGGCCTTCTTCTATTTATGACTGAGTTGCTGCTGTTGATCATGGATATAATATTTAGTGTTTCTCTTTGTTAATTTAGTATGTCNNNTATCACTGAAAATCTTAATTGAGGATAATTCAATCTGATGGCATTGTATTCA
Gma.10707.1.S1_at	BI967315	At5g02560	1e-40	Cell Structure	Histone		ATCTCCTAAGAAGGCCTAGATTATCCTTTTTTTTTTTTTTTTTNNAAATNTAGTGTTGTATATCGGTGCTTAGATGCTTTTGGTGTAACAGGAAATTTGATGTGTTTCTTAAACATTGTAATTCTTGTCCC
Gma.9164.1.S1_at	CA802402	At5g59970	6e-40	Cell Structure			TTTTCCTCCCAAAATGTCAGGCCGTGGAAAAGGTGGGAAGGGTTTGGGAAAGGGAGGAGCTAAGAGGCACAGAAAGGTTCTTCNTGACAACATTCAAGGAATCACGAAACCTGCGATTCGTAGGTTAGCGAGAAGAGGTGGCGTGAAGAGGATCAGTGGTTTGATTTACGAGGAAACCAGAGGAGTTCTGAAGATATTCTTGGAGAACGTGATTCGCGATGCTGTAACCTACACTGAGCACGCTAGGAGGAAAACTGTTACTGCTATGGATGTCGTTTATGCTCTCAAGAGACAGGGAAGGACCCTCTATGGCTTTGGAGGCTAAAGAATAGAATCTTTAGGTTTAATGACTGTGTTGCAGGATNAAACATTGGTTCTTTTGAATTTGCGTGAAGTTTA…
GmaAffx.84638.1.S1_at	CA803077	At4g26750	2e-77	Cell Structure			TTCTTATCCCCATTTTCAGTCTTATCCAAGTTTTACAGAAAGCAGCCTTCCNTCAGTCCCATCNAANTATACTNATTATCAAGGNTCAGATGNTTCATATTCTTCCCAGTCGGCTCCGCTAACTACAAACCATTCATCAAGTGCTCAACACAGTNNNNGNAGCAGAAATGNAACTGTNNNGGAACCTAAGCCAACNNNTACTCAGNCATACCAGTANGACAGTANCTACCANCCAGCACCTGAAAAAATAGCAGANGCACACAAGGCTGCAAGATTTGCNGTTGGGGCACTGGCATTTGATGATGTCTCANTTGCAGTAGACTNCTTGAAGAAATCNCTTGAGTTGNTGACAAATCCATCAGCTGGNCAGTAANATNTTNTGTAAATNGAAATGNGGAT…
Gma.3575.1.S1_at	BQ611599	At1g49750	3e-89	Cell Structure			GGCTTCCAGACCAAAAATCACCCAAAGAATGCTACCAGTTTTACAAAACAAAGAAGACATGCCCTAACCAGAATTCATTTTACTACGTCCCGTGTAAATCCCACTGGGGGACACAGAGCAACAAGCCCCCTGCTCCACCTTCTGAGCCTGTGACTTACAACGCTCTCAAACCACATCGCTTGAGATTGTGATGATCAGATATCATAGGATGGCTCATATTAGTCCCTTGTGTTGTTATTATTATTTTTAGTTTTTCACATATCTCACTGGATGGAAACATCTCTCTCAAGGGGATTTCGAATCTTGGTTCACTCGGGTTCATGTTATTAACGCGGTTATGTTAGTATATTTCTCTTTCATGATTAGCTGTTGTTATTTTGTATTTATCTATGCCCATGA…
Gma.7191.1.A1_at	CD391259	At5g59210	1e-68	Cell Structure			GGGTTTGCCAGACTCTTCTAAAAATGGGGNACATGAGATTGCTTCCTTGGCATCTATGAAGGGCCAACTTGTGNCAGAACAGAGCAGAGCAGAGGNGCTATCTGCAGAAGTCATGCAGCTTTCTGCTCAACTTGAACAAGTCAAACAAGCATATGATGGTCTNGCACGCTTCTATAGGCCAGTGCTGCGCAACATTGAAAGCAATCTCATAAAAATGAAGCAAGACAACTCGTTGGCTGTACGATGATGGTAATGAGCAGTTTCATGATGATATTCCGGTTGTAATTGTGAAGCCCTTCTTTGAAGACATTTCCAATGCCCACAGAATTGTTTTTAACCATTTGATGTTATTAGTTTGGTAAAAGTGGAACGAGATGGCTCAGTAACTGGTGGTAATGG…
Gma.5785.1.S1_at	BI943300	At1g64390	0	Cell Structure			CTCAATATTTCAGAGAAGAGTCATCNCTTGTATTTTTCAACAGCTTTGGATGTCTTTTCTGTGTTTGATGTTGTAAGCTTTGCAGCATTTTGTANTCTCTACAGAGAAACAGTTTGTGCTATATAGTATTATGTTTTTGTGCTGTGCAA
Gma.10775.2.S1_s_at	AI759701	At1g26770	6e-41	Cell Structure			AGCTGGTGATGTGAATTCAGTGTCCATCAAAGGGTCCAAAACTGGGTGGCAACCCATGTCAAGGAATTGGGGGCAAAATTGGCAGAGCAACTCATACCTCAATGGACAATCCCTCTCTTTTCAAGTCACCACCAGTGATGGTAGAACTGTGACAAGCTTCAACGTGGCACCAGCCAATTGGCAATTTGGCCAGACCTTCCAAGGAGGCCAATACTAGAGACATTATTGCAAATTTACAATGGGGGGTANAAAATAGTGCAACAAAAAAAAANNTGTTTGTATACCTATTATTAATCACCTCATTGGAAGAACCATTAAAAGTGTCATTAATAGGTATTGATTCTTGTAACTGTGATTCTGAAAGGCCAGTGTTTTTTATTT
Gma.4001.1.S1_at	BI424053	At1g05570	1e-117	Cell Structure			TTGTCATTTTGATTGCTCTTCCGCATATGACAGTGCAGGACATTGTTGTTTGCATTCTTGCTTTCATGCCAACTGGTTGGGGAATGCTGCAGATTGCTCAAGCATTAAAACCTGTAGTACGCCGGGCTGGGTTTTGGGGATCAGTGAAAACTCTTGCTCGAGGTTATGAGATTGTCATGGGTTTGCTATTGTTCACTCCTGTTGCTTTTCTGGCTTGGTTTCCATTTGTTTCAGAATTTCAAACCCGTATGCTGTTCAACCAAGCATTCAGCAGAGGTTTGCAAATTTCTCGTATTCTTGGTGGCCAAAGGAAGGAACGCTCTTCTCGCAACAAAGAATAGGTTGTNTAACTCTGAAGGNTTNNAATTATTAGGAGNCCNAAATTCTTGGTTGCCNTAA…
GmaAffx.33712.2.S1_at	BQ612879	At4g37450	0.004	Cell Structure			AGCTCCGGGATCAAGCCAGGATTCCATGTCTCCTGGTCCAGCTGTATCTGAGGACGAGAGTGGAGCTGAAACCATCAGGTGCTTGAAGAAGGTCATTGGATGCTTAGCCTTGAGCTGGGCTACCCTTGTTTTGTTCTTCTAGAGAAGAGGCTGAGGCTTCATTGCTGCNGNTANANANGTATTATTGTATCATTTATTGTCTTTTTTGGACCCTGTCGGGGGGCTAAAATTAAATTTATTACCATTGTTTTCTTCAATCTCTTATTACTTTATAATTGATGATGTTTGTTGACACTATTATTATTTTAGTACTCCTTGCTCCAAA
Gma.597.1.S1_s_at	AI443313	At2g16700	1e-57	Cell Structure			TATAGTCCAATGACTGTATGACATGNGCTNTNTCTNCTTCTTTCTTGTTTTTATGCTAGTTTAATTGTGTTCGATGTAAGTGGGGCATCTAATCTTCAATCCTTAAGTCATAATATTAAGTTATGTGTAATATATGACTGTCGGGTGTATGATAAGTTAAGGGCAACAAACTTTGGTTGCAATCTCTTTAATGATGAAAATTTGTGGAAAAGAATGGATTAGCTCAACTTTTCCC
GmaAffx.29009.1.S1_at	BU549171	At5g07270	2e-16	Cell Structure			ATAAAATGGATGGTCCGAGGCTGGAGAAAANNACATGCTCAGGCATGTTTTGGGGTAGAAGAAGTTGCAGNNGGGAGCATCAATGCAATTCAGAAATAAATGCTTGACCTAAGAGGTTGGNNCATGNCCATTCTTATTTTGTGGATACTTCATACAATCTTAGATNAAAAAAGGAGTCTATAGTTTATCTTATTAACCAGCCTCATATGGTGAAAGTCCAATGNATGTATATGTGAGGNGATAGATAATNNTGCATATCAGCATCCCACCACCNTTTTTAGTTCTCAGTTATGATATTTAGAGAGCATTAGTAAAATTAGTANTGAGCNTGNTTGTTATTGNCAATTGNNTNNNNTTNNNTNTCNTTTTTATCATAGAAAAACCAGGTGTTATTTCAAA…
Gma.5675.1.S1_a_at	BE822313	At5g07840	1e-61	Cell Structure			TCAGTGATAGCAGATTTAACCCACCGCTTCATTACTGTCCCGGGCTGGAATGGGCCTACGAGGAGATGAAGCGACTTCGTCAAGAAGATTTGTCTGCTGGAGAGACATCTTACAGCTCCGAAAGTTAATTTGCTTTTCAGGGACTTGGTTGGTGTTTGATAGTGTGTGTTTGGATGCCGTTCAGAGGAGATCAATGTGTGTCAGATCAGAGTTAATATGACTAGCTTCTGCGTCACCTTTATAAATTTGACATGAAAATTTGTTGATATGTGCATTCAGAAAGCGTATCCAGACATGCA
Gma.3578.1.S1_s_at	AW156522	At3g48990	0	Disease & Defense			TTCATTACCGATTCTTTGCCCAAGACTGCCACCGGAAAGATTTTGCGTCGTCTTGTGGCAGAACACTTTGTCTCTCAAATTTGAGCAACTCAAGTCCTACATTTGAAGACTCTATACCTGGCCATACATAGTTGGAGTCCACACACCATAAATTTCAACAGTAGTTTGGCAACTTGGCATTTAGGAGGAGGATATTTCTGCAAATGGTCTTTCATACAGGATACAGTATATTGTAGTTTTCAATGATTCATGTGAAATGTTCACAGTGTAATGTTTTCAAGGT
Gma.7423.1.S1_a_at	BU547609	At3g48990	4e-28	Disease & Defense			TGCTGTTCTTCTTTCACATCCAGAAATTGCTCAAGCAGTTGCTTNNNGAGTGCCTGATGCCAAGTNNNGAGAGGAGGTATAATTTATTTTTGGTTTTTACACAAATGTGCTCAAAAGTTGAGTAAATGACCATTNNNTNTTAGTTCTNTGAAGTNNNTATTCATCATATCTTTTTTAACTNNNGATAGATATATTGTGCTGTCATCCCAAGAGAAGGATCAAACGTTGATGAGGCAGAGGTGCTAAGATTTAGCAAGACCAATCTTGCATCCTTCAAAGTACCAAAAAAGGTCTTCATTACTGATTCTTTACCCAAAACTGCCACAGGCAAGATTNTGCGCCGTCTTGTGGCAGAACACTTTGTCTCTCAAATTTGAGCAACTCAAATCCCCAGTC
Gma.1190.1.S1_at	AF279267.1	At1g51680	0	Disease & Defense			TGAAAGGATATCTAAATGACCCAGAGGCTACAGAGAGAACTNTAGACANAGAAGGATGGTTACACACAGGAGATATTGGTTTCATTGATGATGATNATGAACTCTTCATTGTTGATCGGTTNAAAGGNAATTGATCAAATACAAAGGATTCCAAGTNGCTCCTGCTGAGCTNGAAGCNTTGTTGATTGCNCACCCAAACATTTCTGATGCTGCCGTTGTAGGNATGAAAGATGAAGCTGCAGGNGAAATTCCAGTTGCATTTGTTGTAAGGTCAAATGGTTCTGAGATNNCCGAGGATGAAATNAAGANATACATTTCACAACAGGTGGTNTTTTACAAGAGAATAGGTAGAGTTTTCTTCACGGACTCTATTCCTAAAGCACCCTCNGGCAAAATTCT…
Gma.8449.1.S1_s_at	AF002258.1	At1g65060	0	Disease & Defense			AGATTCAGAGGGTTGGCTTCACACCGGTGATGTTGGCTANGTAGATGANGATGANGAAATTTTCATTGTTGACAGGGTGAANGAACTCATCAAATATAAAGGCTTCCAGGTGCCCCCTGCAGAACTTGAAGGGCTTCTTGTAAGCCATCCCTCCATTGCAGANGCAGCTGTNGTCCCACAAAANGGATGTTGCTGCTGGTGAAGTTCCTGTTGCCTTCGTTGTGAGATCAAACGGCTTTGATCTAACTGAAGAGGCTGTAAAAGAGTTTATAGCTAAACAGGTAGTGTTTTACAAAAGACTGCACAAAGTTTATTTTGTNCATGCTATTCCCAAGTCTCCATCAGGAAAGATATTAAGGAAAGACCTCAGAGCAAAGCTAGAAACCGCCGCCA
Gma.6999.2.S1_s_at	X60043.1	At1g24020	1e-07	Disease & Defense			TCACTGTCAAATACGAAACAAAAGGAGATGCTGAGCCCAACCAAGACGAACTCAAAACTGGAAAAGCCAAGGCTGATGCTCTCTTCAAGGCCATTGAGGCTTACCTTTTGGCCCATCCCGATTACAACTAATCCTCTTCAACTTACTTGT
GmaAffx.93611.1.S1_s_at	CF809336	At1g24020	3e-06	Disease & Defense			GTTGAGGCCATCAAGAGTGTTGAAATCGTTGAAGGAAATGGTGGCCCCGGAACCATTAAAAAGCTCACTTTTGTTGAGGATGGGCAAACCAAGTACGTGTTGCACAAAGTTGAAGCAATTGATGAGGCTAATTGGGGATACAACTACAGCGTTGTTGGGGGTGTGGGGTTGCCAGACACAGTGGAGAAGATCTCATTTGAGGCCAAATTGGTTGCAGATCCCAATGGAGGGTCCATTGCAAAAATCACTGTCAAATACCAGACCAAAGGCGATGCTAATCCCAGTGAAGAGGAACTCAAGAGTGGCAAAGCCAAGGGTGATGCTCTTTTCAAGGCACTTGAGGGCTATGTTTTGGCCAATCCTGATTACAACTAAATAAAGACTATAGCCAAACCAAGT…
GmaAffx.2203.1.S1_at	CD415745	At4g19070	8e-22	Disease & Defense			AAGATGGAACCCTGTTCATCCAACTCATGGAGCCTTTTGGGGAATGGGTGTGGGCGTTGGTTGTGGTGTCGGATGGGGTCCTGGGTTTGGCCCTGAAGTGATAGGCTATGTTGGAGCTGGTTGTGGCATTGGATTCAATGTAGGCATCACTTTTGCTGGTGTTGGAGTTGGCCTACCTGCTAATTTTATCTTTGAAGGTCCATATAATGGGGTTAGCTGGATTGGAAATTTACCTTGTATCTCTGACTTNGCAANGAGAAGCCAATGGAAAATTGTTTGAATTTAGGCAAAAGCATTTATCAATAAAGGGAATTAACTTCTTTGACAAGAAGAACAGCTTGCCTTTGCTCACTTCGGCCAGTAAAAGTATACAAGCATTCCGTAACCAAATATTCAGCT…
Gma.11154.1.S1_s_at	AW309927	At1g63220	5e-44	Disease & Defense			TTGGCGTGGCAACCATTCATCTGGATCCAGTGTTTGAAGCGGGTAGTATTCCAGAAACTGCTTACAAGGTTGTGAAGGACGAAGAATATTGTGGAGAGATTAAGGTGGCTCTCACTTTTACTGTTGAGAAAAATGAGGAGCAGGATTATGCTGAACCTGAAGAGAGCTATGGTGGATGGAAAGAATCCAGTGGGGAATTTTAAAGTGAAAGAAGTATTTACATACTTCCATGGCCAGAATTACCCTTATAATGAAAAATAAGCAGTTTTGGGGTACTTTTTGAGAATTTCCATTATTGTGTTTTCTGGTGTGAAGCAATGGTGTTGTGCTGTTAGGTTGCTTTC
Gma.587.1.S1_at	AF035252.1	At4g35090	0	Disease & Defense			AACAATCACCATGATGGTTTCATGAATTTCATGCACAGGGATGAAGAGGTCAATTACTTCCCTTCAAGGTATGATCCTGTCCGTCANGCGGAAANGGTCCCCGTTCCTCCNCGTANCCTAGGTGGGAAGCGTGAAAAGTGCATGATTGAGAAGGAGAACAACTTCAAGCAACCTGGGGAGAGATACCGATCCTGGCCCTCTGACAGGCAAGAAAGNTTTGTCCGCCGATGGGTTGATGCTTTGTCTGACCCACGTGTCACCCATGAAATCCGNAGCATCTGGATATCATACTGGTCTCAGGCTGATCGTTCTCTTGGACAAAAGATAGCATCTCACNTGAACTTGAAGCCAAGTATCTAAGATTGGTGGTGGANACCNTAGCTTCTANGAGNTGCAGAT…
Gma.5312.2.S1_a_at	AW156630	At4g38400	3e-99	Disease & Defense			GATGGGACATGATTCTTTGCTGAAAAATAACTCACATATACGCATAGATAGTAGGCATCAATTTTATTAATACTATACTATAGGCTCACAATGCAACTTATAATAATACTAAGGAATCATGGACTAGCTTAATAAATTTGAAAAGCATTCTTATTTGTAAACCACTCTCCA
Gma.15938.1.S1_s_at	CD405157	At5g41010	2e-21	Disease & Defense			AGCGATGGATCCTCAGCCTGAGCCAGTNAGCTACATNTGCGGAGATTGTGGAATGGAGAATACGCTGAAGCCNGGTGACGTTATACAGTGCCGTGAGTGCGGTTACCGTATNCTTTACAAGAAGCGCACTCGTCGCATTGTCCANTACGAGGCACGCTGAAGAAAACTGCT
Gma.6472.1.S1_at	BM091717	At5g26990	0.0002	Disease & Defense			GAACACTCTATTTGCTTTCTCTTGATCTTTTTTTTTTCGTATTATTTTCTCATATGTTTCTATAAATTGTCACCTTCCCAATCAATCTAGTACTCTGTTGCAAAACAATGCTTGCTAAGGGCATAATATGCTATCAAGTAGCGTGGGTTTCATTGTCTTCCTAGCATCTCCTAGTTTCTAATGTGTTTCTACTATTTTCTGTAGAAATGTGGAGACATCAACCTTGTCAGTTAAGGATAAGGAGGAGAAGGAAAAAAGATGCGAGTTTGTTCAAGGGCTGTTGCTGTCCACCATACTTGATGACAATTTATAAAGGAAATTCATGGAGGTGGCTGCTTCAGTAGTGGGCGAATTCATATGCGGTACCTGCTATGTATGGTTTGCCTGATGAAATTGTCT…
GmaAffx.89799.1.A1_at	CK605896	At3g12490	9e-35	Disease & Defense			GAACAGCCTTGAGATCGATGGTTTAGCTCGCTTTGCTGTTGAAGAACACAACAAAAAACAGAATGCCCNTTTGGAGTTTGAAAAGGTAGTAAGTGCAAAACAGCAAGTGGTTTCTGGTACCTTGTACACCATCACTTTGGAGGCAAAAGATGGTGGGCAAAAGAAGGTTTATGAAGCCAAAGTTTGGGAGANGGCATGGTTGAACTTCAAGGAGGTGCAAGAGTTCAAGCTTGTTGGAGATGCACCTGCNTAGTCTAGTGCTTAATTAGGTTGCAGAAGAGTGAAGAGTGAGACAGCCTGGCTCGAAGGGGAAAGCCTAAGGATATATCAAAGCATGCTATATGTATAAAATAAATGTAGCTTTTCTACCTTCGGTATTGATATTTGAAATCGTGAT
Gma.7542.2.S1_at	CA936764	At1g32210	5e-54	Disease & Defense			TTAAAGTACTTTTGAATGGCGAAATAAAGAAGGTATTGTTATTATTCANANNNANANNNANANNNNAGCACTAGTCCAAAACACTCAGAAATTGGCAAATTGTAGTCTTCTTTGAAAATAAAATGA
GmaAffx.89705.1.S1_s_at	CK606718	At1g76180	1e-11	Disease & Defense			TAATCGATCATCACTTCACTTCACTAATACATCATGGCAGACGAGACCCAGAACAAGTATGAGAGCTCTGAGGTTGAGGTCCAGGATCGTGGTGTTTTTGACTTTCTCGGTAAGAAAAAGGATGAAGAAGACAAGCCTCATCCTCAGGAGGAGGTCATCGCCACCGAGTTTCAAAAAGTCACTGTCTCAGACCAAGGAGAGAACAAGCACAGCCTCTTAGAAAAGCTTCACCGATCTGACAGCAG
GmaAffx.93382.1.S1_at	CF809107	At1g76180	0.0001	Disease & Defense			AGAAACCCACAAGGCTGTCATATGATGAAATGAAAACAAAGCACACCACAATCATGCATCTCCAACCAACAAAAAAGCCTTGTCTCAATCTTAAATATCAATGAGCACCACTCTCCTTTTCCTTTTCCTTTTCCTCCTCTGTCTTGGAGNGATAACCAGGAAGCTTCTCTTTTATCTTTTCTAATATACCTTTCTTCTCCTTGGCCTCTCCTTCATGATGAGCACCTTCACCATGCTCCAATGATGCAACAGGTGGTGGTGGAGGAGGAGTANTAGCTGTGGCCTCCTCTGTCTTCTTGTGCCCTGGTAGCTTCTCCTTAATCTTGTCGAGGAACCCCTTCTTTTCCTCAGCATGTGCTGTTTCAACAACCTCAACTTTCTCAACAGGGACACTTGTGT…
GmaAffx.84858.1.S1_at	CA853434	At4g33300	1e-132	Disease & Defense			AACTGCCACAGTTTGAGTCAACTACCTGTTGAATTTGGCAAACTAAGATCACTAGAGATCCTCCGTTTATATGCTTGTCCATATCTAGAAACACTTCCTCCTANCATGTGTGACATGAAGAGATTGAAGTATATTGATATTTCTCAATGTGTTAACCTCACATGCTTCCCTGAAGAGATTGGTAGATTAGNANGCTTAGAGAAGATTGACATGAGGGAATGCCCCATGATTAGGTATTTACCGAAGTCTGCAGTGTCATTGCAATCTCTGCAGCTTGTAATTTGTGATGAGGAGGTACAAGATATGTGGAGTGATGTTGAGATGTCCAACTCAAATGTTCTTATTCAAGTAGCAGAACAACACTATGATCTAGACTGGCTTCAAGAGTGACCCATGTGT…
GmaAffx.93392.1.S1_s_at	CF807760	At5g42500	6e-42	Disease & Defense			CACTGGGGCTTTTCGTTTTGCACGTGGCTACGCTCAAGCCAGATTTTACTCTGTTGATTTCACCAAAGGAGACGCTATCGTGGAATACGACGTATTCGTGAACCATTATTGAGATTTACTCCTTCCGTTTCGCAATAGTTACGGAGAATT
Gma.5950.1.S1_s_at	BQ610563	At5g49040	4e-41	Disease & Defense			TTGTACGCGGGCACCTCACAATCGGAGTTCAATTTATTGATTGTTGTGAATTTTGCCTTGACCGAAGGAAAGTATAATGGCAGCACCATCACCGTGGTGGGGCGGAACCGCCTCTCCCTCAAGATTAGGGAGATGCCTGTGATTGGAGGAAGTGGGGTTTTTAAATTTGCCACTGGGTATGTTGAAACCAGCACTCTCTATGTTGATGCTGATAGGTCTACCATTGANNNNAACATTTATGTTTCACATTACTGATCAATTTGTGGTAACTTTATGTTACAAAACTTCTTCTATGTTCCCTTACGTACTGCTATGATTAATTGGGTATGCGGTGTTTTACATATATA
GmaAffx.76142.1.S1_at	BE022388	At2g40000	2e-06	Disease & Defense			TGCCAAGACCTTTCTCGCTTATTATTGGGAAAATAATAATCAAAATGTGGTTCCCTGCTAGTTAATTAAAAAATTAATCAATTAATTCCTAGTCATATATACTTACTCACACAAACGGGAAA
GmaAffx.88880.1.A1_at	CK606277	At5g02380	1e-08	Disease & Defense			AAGGCAACCATGACCTTAACACACCCATCACAAGTCCAAAACACTTGAACTTGCTCAAGGGCAAGAAATGACCACTTTATTCTAAGGGTGTTTGTTTAGACACAAAACACCAGAGTGCAACATAATACATACTACATAATTTTGAAGTTTTGAAACTACATATAGTTTTTATCATTATTTCTAAGGGCCATTTCTGCTTGAAGCTTTAGCTCTCCAACACCTCACTTGCAAGTGCAGGGGTTGCAGGTGCAGTTAGCTCCACATTTGCAGCCATCGTTCTCAGCGGGAACACCCATTTCAGCACTCTCGAATTGAGCCTTAACTGGTGCCACTCCCATGACCAAGGTCTCGGTGG
Gma.405.1.A1_at	AI443411	At3g20820	2e-05	Disease & Defense			CTTGCTAATTAATGCTATTCGATCTATATGATTATATCAACAACTGAGACTGATAGTGTGATTGATCTCATTCACTCTTTTCTAATCACCAATGTGTTTTTCTCGTCATATTAATTCATATTTTTGTCTGCTTTATTTCGTTTAATTTGTAAAATAAANNNNTAGTAGAAGGTTTAATTTCCTGTCATCCATGCACACGCACGTCATGTTAAGATGTGCATGAATTTGAATTCAACCAGCCCTCAATC
Gma.8399.1.S1_at	BU546941	At5g14930	3e-73	Disease & Defense			AGAAGCTATCCTTTCATGCAAAGTGTTGAAGGATGAACAATCTAGTGTGACAGAGAAGGAAGAGGAAACTGGGAAGTTGCTTGAATTCGAGAAGTATGTTTATGGGTTGCTCACGAAATATGAAGTGTCATCAGAGATTTTCCTAAGGCAAAGCAGCTACATGATTTGGTGGAATCAGTATAAGGCAATTAAGGGAACTTCTTATAATTCAGCACTCGCAGACTTCATGAGCAATCCCGATCATTATAATGTGCTGTATATTAAGGGAACTTATAATTTCCCCCCTCAGGCTTAGTGATTAGTGAACGTCCGTGTGGTTGAACAGTGTAAAATAAATTGTGGTTTTATCTCACTGTGCACCTTTTAATAAGCTTTTTTTATATTTTCCCTTGTTGATTT…
GmaAffx.47225.1.S1_at	BE806962	At3g54130	3e-08	Disease & Defense			AAGTGGCAACCACTGAAGCTACCCCTCTAAATGATCAACACTCCAAACAAGTGGAACCCATTGAAGCCACTCCNCCTNTCAATGCTCNAAGCAACAAACATNTGCCTGCTANTGAAGCTNGNTTCTCTNNGAATGATCAAAACAGCAAAGAAGTGGCATCTACTATAGGTGATAANGCTCAAGATGANAACCAGAANAAANAAAAAACNGCCTAAGAGTGTGNTCTTNTTTGNTCCTAATTTGTTTTTGCAATTGAGGACAAAAATCTTTNCCNGTTTAGGTGNTCGAAACATACATCAGTGGCTTAAAGTCATGGTGCTGTGCAGTATACACATTCTCATTTCAATTGCATGATGTATAAACTGTAAGGAAAACCCTTNAGCATTTCCATCGATTATA…
Gma.6847.1.A1_at	CA853003	At5g15870	5e-60	Disease & Defense			GGTAGTTGGTGTTCTTTGGGCTAATAAGAGGGACAGTGGACTATGGTTTGCACCTNNNGAGTGGAGAGAATGTAGGCTTGGCATTCAACTCTTACCGATACTGCCTATCTCTGAGGTCTTGTTTTCCAATGTTGATTTTGTGAAGGAGCTTGTGGAGTGGACATTGCCTGCTTTGAATAGGGAAGGTGTTGGAGAAGGATGGAAGGGGTTTGTCTATGCTCTGCAGGGTATTTATGACNATGAAGGTGCAATGCAGAAGATAAGAAGCTTAAATGGATTTGATGATGGAAACTCATTGACTAATCTCTTGTGGTGGATTCACAGCAGATCTGATGACGAGGAATTTGGTCATGGAAAACACTGCTGGTTTGGTCATTACTGCCACTANGTATTGTTAAT…
GmaAffx.88762.1.S1_at	CK606334	At3g09270	9e-53	Disease & Defense			CAAATGGAGCCAAGAATCCCTTAACCACCCTTTTGTGCAAGAAGTC
GmaAffx.666.1.S1_at	BM143164	At1g03230	7e-29	Disease & Defense			ACAGAGCCTAGAATGTCGTTCGTTAAAGCTTCAATTGTTATCGGTGGATATCAGTTGGAGGACAATCTTTTGGAGTTTGATGTGGCTTCCTCCAAATTAAGCTTCAGCTCATCGCTGTTGCTCCACAATGCCACATGTTCACGTACTTGAATGTCATAGCCTTATAGCCTTATTACGTGTTGAAATTAGCCACTTTCAATTATCTAGTAGCTTCTATATCTTTCAA
Gma.6999.1.S1_s_at	AF529303.1		3.1e-56	Disease & Defense			TCACTGTCAAATACGAAACAAAAGGAGANNNNGNGCCNNANNCNNNACGANNTCAAAACTGGAAAAGCCAAGGCTGATGCTCTCTTCAAGGCCATTGAGGCTTACCTTTTGGCCCATCCCGATTACAACTAATCCTCTTCAACTTACTTGT
Gma.6999.1.S1_x_at	AF529303.1		3.1e-56	Disease & Defense			ATAGAAAGCATTGCCAGACACGGCGGAGGGTCTGCTGGGAAGCTCACTGTCAAATACGAAACAAAAGGAGANNNNGNGCCNNANNCNNNACGANNTCAAAACTGGAAAAGCCAAGGCTGATGCTCTCTTCAAGGCCATTGAGGCTTACCTTTTGGCCCATCCCGATTACAACTAATCCTCTTCAACTTACTTGTTATCACTTTCTTGCTTTTTCTTGCTTGGA
GmaAffx.46214.1.S1_at	BE659266		3.1e-46	Disease & Defense			TGAGACTTCGAGGAATGTTCAGTTCCCATTGGTGTTGGATTCAGTTGTGAGCATAGTGGTGAAGAGGCCAAAAAAGTCGAGGAGCAAGAAGGAGAAGGAAGAGGAAGAGGAGGTTCTTGTGATTGAAGGGGTTGAGTATGACAGCAACATACCAGTGAAATTTGNTGTGCTTNNTAATGATNAAGATNNNAAGCAGATTCAGCCAGANGATTCGGAGTATGCAGGAAGCTTTGTGACTGTGCCTCATTCGCATAAGCACAAAAATAAGAAGATTATCACTTGTTTGAGGCTGGGACTGACAGATTTGTTGGAAGAATTGGAAGCAGAAGATGATGATAGTGTTGTGGTGACGTTGGTTCCGAGGTATGGGAAAGGGCGTGTCCAAATTGGAGGCATCAA…
Gma.13217.1.S1_at	CD391191	At4g28240	3e-12	Disease & Defense			CAACGGTGGCGGTAGCGCAAGGCCACACCGATCCCGGCCACAAGTGCAAGACGGCGCTCAACTCCATCCACCACAACCGGAGCCGCCTCTTCTCCGGCGGAGCCCTGTCTGATCTCCGGCCGCTGTCCGGCGTCGTTGGACCTGACGTCTCTGGCGCGGCAGCGGGGAGCTCCGACGCGAAGAATAGGGTGAGCCAAGCCGATGACTCTCTGAGGAAAGTGATGTACTTTAGTTGCTGGGGTCAGGGCTGAACCACACGTGATGAACGGTGGAGATTAAAGTAGTCGCCGGAGAAAGTGAACCGGGTCTGTTTTCGGGTCGGGTTCGGATCTGAGTTGACCTGGCCGAGTCTGATCGGATGACTCGGTTGGAGAAAAAAACTTGGAATGTTCTGATCTT…
Gma.4531.3.S1_at	BE059056	At1g35140	3e-05	Disease & Defense			TGCTCAACGCCCGTGTGATCAGAAGGGTTATTTTGGTGATGCCGATCGTTCTGTTCCATGCTGCTACTACGATGATGTTAGAAACCACGGATTAGGGAGGTGTACAAAGCTTCTAATAAACAT
GmaAffx.14986.1.S1_at	BE657889	At4g08950	6e-28	Disease & Defense			TCCGCTTGCACAGGGCTGTACGGCAAGGGCGCTTACCCTGGCTACGCTGGGGAACTCTTGCTGGACNCNNNNNCCGCCGCTAGCTACAATGCTAACGCCGTCAATCACCGCAAATATTTGTTGCCGGCACTCTTTGACCCTACCACTTCAGCTTGTTCTACTCTGCCGTAACTCTAAAACTCGGGTGCTTAGCTTCTATGTTAGGGCTACACTATCACCCAAGAGATTCTTTTATTTGTTGTTTATCTGGATGAA
GmaAffx.69994.1.S1_at	CD417025	At4g08950	8e-45	Disease & Defense			GTTTCACCAGCCCATATATGGGCCTCAAAGCCCACCTCTTGNTGCGCCGAACAACGACGTGGGCATTGACGGAATGGTAATAAACCTGGCGAGCCTCTTGGCNGGGACCGTTACGAACCCGTTTGGCAACGGGTTCTATCAGGGCCCAGCCGAGGCTCCACTCGAAGCGGCTACGGCTTNCCCTGGGGTTTATGGCNAAGGGGCTTACCCTGGCTACGCTGGGAATTTGAACNNGGACTCTTCCACTGGTGCTAGCTATAATGCGCACGGTGCTAATGGAAGGAAGTACTTGCTTCCTGCTTTGTATGACCCTGCCACGTCATCGTGCTCCACCCTAGTGTGAGTGATGAGTGCTAATAGTTTAGGGAGTATAAGCATTATTATGTAGGGATTATTGAT…
GmaAffx.79054.1.S1_at	CA938684	At4g08950	1e-114	Disease & Defense			AGAATCCACCTTTGGTTGCACCCAACAACGATGTGGGACTTGACGGCNTGCTGATCAATGTGGCTAGTCTCCTTGCTGGCACTGTCACTAACCCTTTTGGAAATGGTTACTTTCAAGGACCCAAAGAGGCTCCGTTGGAAGCAGGTTCGGCTTGCACTGGGGTGTATGGTAAGGGCGCGTACCCTGGCTATGCAGGGAACCTCTTGCTTGACCCCACCACTGGTGCCAGCTACAACGCTAATGGAGTCAACGGAAGGAAGTATCTGTTGCCAGCTCTTGTTGACCCTGAAACCTCAGCTTGCTCCACACTCGTGTAAAACTACCACTCAAACTAGTTTTCATCCATGCTTAGTTGTTACTTGTTAGGCAATACCAGAGATTCTTTCATTTCTTCAT
Gma.6743.1.S1_at	BE657937	At4g14420	7e-30	Disease & Defense			ATTGTTCCTGGTTGCTCATTATACCCATTTTCCATTTCTCCAGGATTTGNCTTTNGGTNTCTGTCTGGTTCAGAACGAATGTACCTTCTGTCNGATGNATTATGTNTAATTTATAATTANTNNTATATGTATNNTNNTTTTNNGTTTGCNTGACATTANAAACTNTCTTTCGATTACTAAACTTGTATACGAAGAGGGNNAAAAATGATCANAGCCNNTTCATTCAGACTGGGTGTCAATTTCGTTCTGTCCAACGGATTTGATCGAAAGGTGAAGTCTGGCA
Gma.15877.1.S1_at	BU760936	At5g55850	2e-27	Disease & Defense			GTTCACAGTGATTTTTAATAAGGCCAGGGATGAGAAAAAGACAGGTGGNAACCCAGANTCACCAGGAAAGACTGCNACTGATCCTCATAGCAAACCTGCNGTAGAGCCTGGCAAAACTCANACTAAAAAATGGTTTTGCTGCATGCAAAACCCTTCTGCCGAATCATAGCATAGCAATGGTTGCTCCTGTGAAAAGCCTGAACAGAAGAACAATGTTTNNGTGTAACTAGNGTCACAGTATTTTCTCNAAGATAAGAGCTGTAGAGNCATAAGCGAATTCTACGGAATTTNTATTNTGTGNTGTAAAAGTGAGCTGCAATGGGGGAAAGAAAAGAAGACAGACTATTATTTATGTGTGTGTATCAATGTTGTGGTTTATTATTAGGAGCCAGGGTTGCT…
Gma.2821.1.S1_at	AI461152	At4g11650	4e-86	Disease & Defense			TGGGTGCGGTCCCACAGATTATTCCAAGTTCTTCAAGGAGAGGTGCCCTGATGCCTACAGTTACCCTATGGACGATGCAACCAGCATGTTCACTTGCATGGGATCCGATTATAGGGTTGTGTTTTGCCCTTAATTAATTCAACATCATCAACTACTTTTTTTTTNATTTTTTATTTTTATTTTCCTTCTCTAATTTCGTGATTCCTATTTGTGTTATTGTTGAATACTTTGATATGTGTATTATTTATCACCAAATAAAGACGTTCTTAATTGGGGGCTTTGGGCGCGGATCTCTGCCTGCTGAGATGTCCCAAAATAAGTNATAAACATTNACATAAATTAATTCACATGTCCCAAAAGAGTTCTTGTTATTAGAGTCCTAGGGAGTTGATTTATGAT
Gma.4886.2.S1_at	AW234624	At4g30170	1e-69	Disease & Defense			TGGTTCGCTCTGCTGTTGCACAGAAGTTCCAACAGACCTTTGTGACTGCTCCTGCCACTCTTANNACTCTTCTTCCATGATTGCTTTGTGAGGGGTTGTGATGCTTCNATTTTGCTTGCAAATGGTAGGCCAGAGAAGGATCATCCTGATCAAATTTCTCTAGCTGGTGATGGTTTTGACACAGTGATTAAAGCCAAGGCAGCTGTTGATAGAGACCCTAAGTGCCGTAACAAAGTCTCTTGTGCTGACATACTCGCTCTGGCTACTANGGATGTCGTAAATTTGGCTGGTGGACCATTTTATAATGTTGAATTGGGAAGGCGTGACGGGAGAATATCTACTATTGCCAGTGTTCAACGCCATCTTCCTCACCCTGAATTCAATTTGGATCAGCTCAAT…
GmaAffx.90703.1.A1_at	CF809087	At5g05340	3e-80	Disease & Defense			TTGAGTCTCGAATATTAAGGGTCCTACTACACATACGCAAGCAATTTAATTGTGTTTAATAAGTTGTTAAAACATGTTTTGGTTGTGTTTTGGATTCCGTGGTGGGTTAATTTCCTAGTGTAGTTGCTGTTATCAATGCCGTATACGTTAGTGTGTGTTCTACTTCCCTTTATTTTTGTCTCTTTTTTACTTTTCCTTGACTATATTGTAG
Gma.876.1.S1_at	L78163.1	At5g06720	4e-88	Disease & Defense			AATTTGGACCTGAGCACACCTGATCAATTTGACAACAGATACTACTCCAATCTTCTGCAGCTCAATGGCTTACTTCAGAGTGACCAAGAACTTTTCTCCACTCCTGGTGCTGATACCATTCCCATTGTCAATAGCTTCAGCAGTAACCAGAATACTTTCTTTTCCAACTTTAGAGTTTCAATGATAAAAATGGGTAATATTGGAGTGCTGACTGGGGATGAAGGAGAAATTCGCTTGCAATGTAATTTTGTGAATGGAGACTCGTTTGGATTAGCTAGTGTGGCGTCCAAAGATGCTAAACAAAAGCTTGTTGCTCAATCTAAATAAACCAATAATTAATGGGGATGTGCATGCTAGCTAGCATGTAAAGGCAAATTAGGTTGTAAACCTCTTTGCTAG…
GmaAffx.91141.1.S1_at	CF806866	At5g06730	2e-63	Disease & Defense			TGCCATTGTCAATAGTTTCGGTAGTAATCAAACTCTTTTCTATGAACATTTTAAGGTGTCAATGATAAAAATGAGCATCATTGAAGTGCTAACGGGGTCACAAGGAGAAATTCGAAAACATTGTAACTTTGTCAATGGGGATTCTTCTAATCTGGCTACTCTAGCCACCAAAAAATCTTCAGAGGATGGTATGGTGAGCTCAATCTAGATGAGTTAACAAAAGATATCCTAATGCAAAAATGAAAGGTCATTAATAAAGGGGTTATATAGGAAGATACATGTTGTGTGCTAATGGTGAATCATAATATCGTTTGTACCTTGTATTAGCTACGGATAACAACTACTTATTTTGTAATATATTATTATTAGAATTAAGTTGTTTGGTGTTGATGGGTTT
GmaAffx.78026.1.S1_at	BG043235	At1g65980	8e-38	Disease & Defense			CTGGATTTTGTGGAGGATGTAAGAAAAACACAAACAACACAAAATTCATTGCACAGTGTTATTTTCAGTATCAGCATCATGGCTCCAATTGCAGTGGGAGATGTCATTCCAGAC
Gma.11336.2.S1_at	CA852094	At1g18250	1e-113	Disease & Defense			TCTCTACTTACCTTAGCTAGCCTTATTTTATTGTCATACCTCCTTTATGTTGATGGGTACTACTACTATATATGCCAGTCCCCATTCATATTATATGGTTCTTCAACTTTATTAGTTCTTGCACGACATTGGATCTATGTAACCCAAGATGGCATAATGGGAAGATATATAGTATTATATTAANNNNGGNNTANCNNANNNTTGGACTCGGTTTGATGACCATTACTACCTTTTTTCGTTAAGGCGCGCTAATGTGCTCAATTTATGGTAGATGGTGGCGAACCATATTCTATTCTATCCCCACGGGCCACGGTGTAATTGATGTGTACTTTTTTCGTCTNTAATTGGCTTATGATTTGTCTATTTCACAAACCATATGGTGGCGAACCATATGTGTTG…
Gma.584.3.S1_at	BE610674	At5g09600	7e-23	Energy			CTTCGACCCTCTCAATTTTCAATAGAATTGCTGGAGCTTTCCTAGCCGGTGTCATTTTGCTTTTTTATATGATCTATATGAAATTGGGTTTGGTTAGCCTCACCTATGACTCTTTCTACCAGTTCATATTTTATTCATCAAAACTCAACCTGCTTGTCATGGAGATTTCTGCCTTAGCCGTGTCCTATCATCTGTATAGTGCAATTCGTCATTTATTCTTATGATTAGAATCAACAATTGACACCTGAACTGTACGTTTGAACCTGAGGTGGAACTTTGCATAATTCGACCTTGGAGGCATGCATCCATATGTCTGTCAGTCATAAGGAACTTCATTAAGAAATGTGAATTTGCTTTATTGTAGTTATGTATTATTGACTTAATAATTACAATTCTGGC…
Gma.5427.1.S1_at	BM091753	At1g15690	0	Energy			TTGGGCCCGAAAGGATCTGAACCGCACAAGGCAGCTGTTATTGGGGATACCATTGGAGACCCTCTTAAAGATACTTCAGGCCCTTCACTCAACATCCTCATCAAGCTCATGGCAGTTGAGTCGCTTGTCTTCGCACCATTTTTTGCCACTCATGGTGGTCTGCTTTTCAAGATCTTTTGATTTGAGGGAATGCAACCGTACTTAGGGTAGAGTTTTCTATCAATTTATCCTATTTTTGTCGGAGCCTGCAGGCATTTTTCTTTTGTATCAATACCCTCTCCACCTTTAGGGGTAGCTCTTCAAATTATCAGGACTTGAAATTTGTTACCAAATGTAGTAGTAGTTTTTGCCAAAGTGAATTTTCAATTAACCAGCTTTTGGACTTTTCATCGAGTTTTT…
Gma.4612.1.A1_at	CD404099	At3g22960	4e-54	Energy			TTTCTTTTGAAAGCCAACATTGCTGCTTGTTCAAAACCTGGGATGCTGCTAGAGTGCTAAAATGGGGCAGAGACTACATGAATGAATTTTGTTCGTTCTGTCATTTTAATTTATAGGACACGACAGAAGTTTGGGAGAGTTAATATTATGGCCTTGAAGTTCTTAGTTTTAATGCATACACCTTCAAGCTCTAGATATCTTTTTTAGTCGAGTGAGGCAATAGTGTAATAGCTACCCTTTTAAGTTGTAAGGCACACATTTGCATTTTCCATGTTTTATATCATTGCATTAGCTTTCCACTTCAATGTTG
Gma.2650.1.S1_at	AW349689	At5g20080	1e-122	Energy			CTCCCCGGATGACATACTGCTTAAACAAAAGCTTGACATTCTNGCAACAAGCCACCCAAACTTAAAGATATTCTACACTGTAGATAATCCAACNAAAAATTGGAGAGGAGGTGCNGGNTACATATCAAAGGATNTNGTTGTGAAAGGCTTACCCNGNCCTAGTGATGATACTCTNATACTTGTGTGTGGACCCCCNNGTATGATGAAAGCAATATCTGGAGAAAAGGCCAAGGACTGGACACANGGAGAGGTTTCTGGCNTCCTAAAAGAGGCTGGATACACTGAACAAATGGTATACAAATTCTGAGAAGTTTAGTTTTCTTGCATCTGAAGATAGTATTCGAAGCNCTTGTCCGCTGCAGAATTCGTGTACTGAAATGGTTTTCTGAAGAATAACAG…
Gma.1863.1.S1_at	CA819577	At5g37510	1e-106	Energy			ATTCGAGCTCTATCTGAGGTGGCAGGAGTGCNTTTGCCCTATGATACAATTGGGGCCGTTCGTGCCCGAATCAGTACTGTAGCCCCAAACCTTGTGAACATGGATGAGAGAGAACCGGCCACATTGCCATCTTCACTCAGACCAACCTTCTCTGAGAAGGTGGACACCACCCCATTCGGGACTGTAGTTGAGAATTTCTATATGACTGATGCCATTACNAGGGCATCAAAGATAATGGCACAATGCAGTGCCATGCTGTTGAAGTGAAACATGGATTTTTTATTTTTTGGTTTCAATAATGAAGATTCACGTTTTTCCTTTCCTGGCCATGCAAGACTTTGCTTGCCCAAAACTTATTGGATGTTTGAAGTATCCAATAAATTAAAACTAGGATTTATC…
Gma.3871.1.S1_at	AW349536	At3g18410	2e-47	Energy			GGGCAAGGACGGTCGCCACCCATCTCTCCACGCTCCCAAGGTTGACCCTGTTGAGTCTGAATGACCTTCCTGTGGACAATAATAACAAAAAAAAGGGAAGACCGTTTATCCAACTNATCATATTGCTGAATCGGATATTGGGTTGGAGAAGTGNTTGTTGCAGTTATTGTGTTCATGTTCTTTTTNTTTAGTTGAACTTCCTGCAAACTACAACTGTATTTTGACTTAGCCTTGGCTATTTTTCCTTGGCTCATTAGTCTTATGTTGTTTGTTACCATTTAAATGTAAACAAGNAAGGAAAGGCTATNAACAAAGTACATCACAATCAGATTATGAAATAAGTTTATTCGTTCCCTGTTGATTGTANATGTTATCCATTCCGAATATTCAAAGT
Gma.745.1.S1_a_at	BE821420	At5g67590	6e-48	Energy			AAATCCACTGATGGGCTGGACATCCACTGGGGACCCCTACTCTCATGTTGGTGATTCTGCCTTGACTTTTGATAGNGAANAAGCAGCAAAAGCATTTGCAGAGAAACATGGTTGGGAGTATTCGGTNAAGAAGCCCCACACACCATTGCTGAAGGTTAAATCATANGCGGACAANTTCAAATGGAAGGGACCACCCAAATCTGGTGAAGAGTGATTTGTTGGTTTGTATTCATGTTAATG
GmaAffx.30142.1.S1_at	AW311191	AtCg01100	4e-30	Energy			TATCTCTATTCCATACATATTCGTTTCTGACTTTTTTGAAATAAATCAAACATATGGAGTTTTTGTAACGATAATTGGTATCTTTATTACACTAGCTAAAACTTATTTATTCTTATTCCTTTCTATCGCAACAAGATGGACTTTGCCTAGGCTAAGAATAGATCAATTATTAAATCTTGGGTGGAAATTTCTTTTACCCATTTCTCTCGGCAATCTATTATTAACAACTTCGTTTCAACTGTTTTCACTG
Gma.10852.1.S1_a_at	CD414600	At1g03130	3e-77	Energy			AGTGCTTGGCTCTTGGGACTAGGCTCAGGTCCAAGTACAAGATCAAGTACCAGTTCTACAGGGTCTTCCCTAATGGGGAGGTTCAGTATTTGCACCCTAAGGATGGTGTTTACCCTGAGAAGGTCAACGCCGGACGCCAAGGGGTGGGTCAAAACTTCAGGTCTATTGGTAAGAATGTTAGTCCTATTGAGGTCAAGTTCACTGGCAAGCA
Gma.62.3.S1_at	BE658575	At3g14940	4e-15	Energy			TTGTTCTCAGATACACTTTTTTTGTTTTGTTATTATGTTGCCCCACCTTTCTGTACAATTTGGTATGCTGCTCTAGAATTCCAGAAGAGCTAGCTACCACACAAATGAATCAATGACATTGATCTGTTATGTTTCTTATGCTTAGTACCGTTACTACACCCTTCTATACTTCTTTGTATC
GmaAffx.83725.1.S1_at	CA783206	At1g53310	2e-64	Energy			GAACATGCTAACTGGTCTTGATGCTGGGGATTCTATTGTGATTTCCAAGTCGTTTGCTCATATGCTTAATTTGGCAAATTTGGCAGAAGAAGTTCAGATTGCCTACCGTAGAAGGATTAAGTTATTGAAGAAGGGTGATTTTGCTGATGAGAATTCTGCTATCACTGAGTCAGATATTGAAGAGACTTTCAAGAGGCTTGTGAATCAACTGAAGAAGACACCTCAAGAAATCTTTGATGCTTTGAAGAGCCAAACTGTAGATTTGGTCTTAACTGCTCATCCTACTCAGTCTGTTCGTAGATCTTTGCTGCAAAAGCATGGCAGGATAAGGAATTGTTTGACACAGTTGTATGCTAAAGACATAACACCAGACGATA
GmaAffx.93326.1.A1_s_at	CF809051	At4g26270	3e-08	Energy			GACTTGTTCATCTACAACTGTATTTGGGGACATGTTTTATCTTTTTGACTCAAGCCCTACAACCTCCAAAGCCTGGAGTATTGGGAGCTGTTCTTTTTGTCCTTTTCCATGTTTTGCAAGTTGGTACGTCTTTCTTTATAAAGACCTACTACCGTCTTGCGTGATTGTTGTACTCAGAAGATTGCTGAATTTTAACCTGGGTCATT
Gma.4509.1.S1_at	AW433213	At3g51030	5e-21	Energy			GTAGCATGATTTGTGATTCCTCTAAATATTTTCTTCCACCGATTTTAANNANNNNNTNAANANNGNANNANANTNNNAGAAATTGATTGTGGTGGATTTTACTGCTTCTTGGTGCGGCCCATGCCGTTTCATTGCCCCAATTCTTGCGGATATGGCTAAAAAGTTGCCGAATGTCACCTTCCTCAAGGTGGATGTGGATGAATTGGCGACTGTTTCCNNNNNNNGGGAAGTTGAGGCTATGCCAACCTTCCTATTCTTGAAAGAAGGCAAGCTGGTGAAGAAGCTTGTGGGTGCCAGGAAAGAGGAGCTGCAAGACATAATAGTCAAACTTGCTGCAATTGATGCTGCCTGAAGTGCCATATGAATATGTTGAGAATAATTGACTATTGTCTTCGAGTC…
Gma.15493.1.S1_at	BE474397	At2g17420	5e-72	Energy			GTTTTTCGCAATTGGGCACGAGCCCGCNACCAAGTTCTTGGACGGGCAGCTTGAATTGGATTCTGATGGATATATTGTGACGAAGCCGGGGACGACGAAGACCAGTGTNGAGGGAGTGTTTGCTGCTGGGGATGTTCAGGACAAGAAGTATAGGCAAGCTATTACTGCTGCTGGCACTGGATGCATGGCTGCTTTGGATGCAGAACATTACCTGCAAAATGTTGGTTTACAACAAGATAAGAGTGATTGACTAGCTTGGGTGTGTCCGGAGATCAGAAAATGCTTAATCAGAAGCAATGTTTAATTCCTATAGAAGAATNGNGANNNNNNNNTGCATCCTACNAGAATCTNCATTTGTGGGTTGCNACATTCATATTTTTATTGCAGANNNAGANTTGC…
Gma.10771.2.S1_at	BU762116	At4g10040	8e-58	Energy			TCATACAGTTATGCACTTTGCTTCAAAGTTCTGGAGATTTAGTTTTCAGACATTTAATTCTGTGGTGCAGTAAATACTGTATCAACAAATAAAGTAGACTTGATTGGTTTGCAATGCTATTTTGTTCGTTTTGCATTGCTTCTTAAGAGGCTGCCATATATTGGCTACTGTTCAATTAATTTGGTTGTTGAAAGTTTAAACATTGT
Gma.10771.2.S1_s_at	BU762116	At4g10040	8e-58	Energy			TGTTTACTTTGTTTTGCATATCCGAATGCAATGCGTACTTATATT
Gma.4819.2.S1_at	AW597363	At2g36530	1e-175	Energy			TGGTTCTGCTGCTGTGTATGCTGGTGCCAAATTCAGAGCCCCCGTGGAGCCCTACTGATTGTTTAGCCCAAGATTACTAAGCATCATTTAAATAAGATTCTATTGATGACTGCATAGGACATGTATTTTTTGCGAAAAATAAACTTGTCTACTACTTCAGAGAATATAGGTTTTCCGGGCGTGGAATTTTGAAGCGAGAAAATAAGGCAGTAGATGTATGCCTGATGCCTAGTTTATTTGAAATCTAGCTTTAGGGGGTGTTTGGTGCGACAAATTGTTTTCCAGAATCATAA
Gma.15514.2.S1_at	AI965499	At3g52300	1e-65	Energy			TTTCAATTAGCAAACCATCAGAGGTTGATGTTGTTCTTGCTGGTTTAATAATAACAACTACATTGAATTCTTTGTAACTCGGTTCTCTTTTTCAGTTCAAAGGTTCTTATATTACAGTGTTGAAATTNTGTGGTACTGTAGTTAATCACTTGAGACTTATCCACAAAGTGCGGTTGTGGTCGTCGGCGAAACTGCTGATAAGGTTTCCGTCCGGAGACAATTTGAAGAAAATGTTGTTTTGCGTTAGTCTTAATAAATT
GmaAffx.1301.59.S1_at	BI974591	At1g35720	4e-47	Intracellular Traffic			ATGGCGACACTTAAGGTTCCTCAGCCTCTTCCCCCCGTTGCAGATGATTGTGAGCAGCTCCGAAAAGCCTTCTCAGGTTGGGGAACTAACGAGGAGCTGATTGTATCGATCTTGGCTCATAGGAATGCTGCTCAGAGGAAGCTTATCAGAGAAACTTATGCCCAGACCTATGGAGAAGATCTCCTCAAGGCCTTGGACAAAGAACTCACGAGTGATTTTGAGAGGCTGGTTCATCTTTGGACACTTGATTCTGCTGAACGTGATGCATTTTTGGCAAACGAGGCGACTAAAAAATGGACTTCAAGCAATCAGGTTCTGGTGGAAATAGCCTGCACTA
Gma.7062.1.S1_at	AW734156	At4g34450	1e-131	Intracellular Traffic			ATGTGAAGGTTCTTGTGCGGTTGTCTTTTGGACTTGATGGTCCAAAGGATGTTGCGATGAAACTTNCTGTCAGATCCGAGGATGAAACTGTNAGCGATACNATCCATGAGATTGTGGCTAGNGGCTAGTGCACTNNNTCAAGAAATGTTGNCTCAACTCGGCCTTTCTTTTTGTTACTGAGATTGGAGTTTAGCAGCCTCATAGATAGCCGTGTGTAAAAAGNATTGCAAAACTGTACACTTNNNANTATATGCAATTTATTGGTCNCCCATTNNGCATGCTTNGTTAGACNNGCAACAATACTTNCCAGTATTACGTTGGGTNTGTTGGAGTAAACTTCAATGGTGATGATTATACTTTTCATTTATTTGTAGCAACTGTAATACGAATTTTGG
Gma.2369.1.S1_s_at	CA802514	At5g61790	1e-88	Intracellular Traffic			TATACGATGTCATTGAGAAGGGTCAAGAGCAACCAAATCTCACTGTTGGAATTGTTGTAGCCGTTGTGGTTGTCATCGTGTCAGTTTTCTTGAGGCTCATATTTGGTGGGAAGAAGAAGCCCACAAGGGTGGAGAAGACAAACGTAGAACCAGCAGAAACTGCAACTAGCCAAGGCAGTGGTGAGAATGAGGAAAACAAAGAGAAGGAGGAATCATCTGCCCCTGCACGTCGGAGGCCAACAAGGAGAGATAATTGAAGAAATGATTGAAACTTAACAGACAGGGGCGGCCATTAAAGAACACTACCGCACATAAATTTTGAGCTTAGTTTGGGCATTAGGCCAATTCTGTAGTAGCAGGTTGTTGTAATTTTTCCCTTCACCTTTTGAAAGATGATAT…
Gma.6298.1.S1_at	BM309168	At3g62290	1e-100	Intracellular Traffic			TGGTTCTCTCATGAGACAAATTGGCTTTATGTTAATGTTTTATGGCT
Gma.17386.1.S1_at	AW471512	At3g22950	6e-80	Intracellular Traffic			TATCATTTATACTTCTAAGAGTCAAGCAAAGATAATGTGTTT
Gma.12506.1.S1_at	CD404127	At3g49870	1e-93	Intracellular Traffic			CCATCATTGGGTGGCATCCCTCTGTTGGTATTGGGGAACAAGATTGACAAAGCGGNGGCTCTGTCTAAACAAGCANTGACNGACCAAATGGATTTGAAGTCAATTACTGACAGGGAAGTTTGCTGCTTCATGATCTCGTGCAAAAACTCGACCAACATCGACTCTGTTATTGACTGGCTTGTAAAGCATTCCAAATCAAAGAGCTGAGAGCCTACTTTCTGTTTTGAACTCTAGTGTAATTTATGGGTGACACATTTTCTGGATTTACTAGAGGCATTTGCATGTCTAACTCGGTTGCTGATTGATTTGTTTTTCCCTTTTGTCAGATGCTTTGTAATATAATATCACATCATTCTTGTCCNATAGGGANTTAAACGGGANNANATACATGTGAAGGGT…
Gma.12506.1.S1_x_at	CD404127	At3g49870	1e-93	Intracellular Traffic			ATCATTGGGTGGCATCCCTCTGTTGGTATTGGGGAACAAGATTGACAAAGCGGNGGCTCTGTCTAAACAAGCANTGACNGACCAAATGGATTTGAAGTCAATTACTGACAGGGAAGTTTGCTGCTTCATGATCTCGTGCAAAAACTCGACCAACATCGACTCTGTTATTGACTGGCTTGTAAAGCATTCCAAATCAAAGAGCTGAGAGCCTACTTTCTGTTTTGAACTCTAGTGTAATTTATGGGTGACACATTTTCTGGATTTACTAGAGGCATTTGCATGTCTAACTCGGTTGCTGATTGATTTGTTTTTCCCTTTTGTCAGATGCTTTGTAATATAATATCACATCATTCTTGTCCNATAGGGANTTAAACGGGANNANATACATGTGAAGGGTTA…
Gma.4707.3.S1_s_at	BG725902	At5g14670	3e-56	Intracellular Traffic			GGAGAAGAACCAGATCTCTCTTTCTCAAATCACCAAGAATAGTTGAAAATGGGGCTGTCTTTCACGAAGCTGTTCAGCCGGCTCTTTGCGAAGAAGGAGATGCGTATTCTTATGGTGGGTCTCGACGCCGCCGGTAAGACCACCATTCTCTACAAACTCAAGCTAGGAGAGATCGTCACAACCATTCCCACCATTGGGTTTAATGTTGAAACTGTGGAATACAAGAACATCAGCTTCACTGTCTGGGATGTTGGTGGCCAGGACAAGATCCGTCCTCTGTGGAGACACTACTTCCAAAATACCCAAGGGCTTATCTTTGTGGNTGATAGCAATGACCGGGATCGTGTGGTTGAA
GmaAffx.91116.1.S1_at	CF806841	At2g03290	2e-05	Intracellular Traffic			TTCCCTCTTTGTCTGCTTATCAGTAGCAGGGATGCAAATATGGCACTTGAAGACCTTCTTCGAGAAAAAGAAACTCATTTGAAATTTTGTGATAGTGATTTTACATTTTTCTTCATCCGTGCGCTTGTAAAATATACCAGCATTAATTTATCCTGAGGATACACATAACGGTAGTCAGT
GmaAffx.88475.2.S1_at	AW102026	At4g24550	9e-94	Intracellular Traffic			GGATCGGAGCACACTCTACATGCAAAACTAACCTTTTCTCAGGAATCTCACGTTAATATAACAAAAGAATCAGGACCTGTGAGCATGACATTTACTATACCAATGCATAACGTTTCACGGNTTNNNGTAAAGTATTTGCAGATAGCAAAGAAATCTGCAACGCATGAACCATACCGGTGGGTTAGATATGTTACACAGGCGAATTCCTACGTCGCTCGTATATGATGCCGTTAAGAACACTGTCCCCTCCCCCGCTCTTTGTTTTTCTATTTTGTTTTCCTGCTCTTATTGCTCTTTACACACATGCTTTNGNTTATTTACTTTATTCTTTATTTGTAAATTACACTCTAAGTTTACATTCTAAGTCGAATATAGATGACGTTTTCAGTTTGCCTGATT…
Gma.16342.1.S1_at	BI968678	At5g14420	1e-55	Intracellular Traffic			CTTTGAGCAGAGTGCCCCTTCTTATTATGACAACANGGACCNNGTTGGCACAGCTCCTCCTGCCCCAAGTTCCNCATATGACAATCAGCTTTGCCCCATATGTCTGACCAATTCAAAAGACATGGCCTTCGGATGTGGACATCAGACATGTTGTGAATGTGGACAAGATCTTCAGTCGTGTCCCATCTGTAGAAGCCCCATTAACACCAGAATTAAGCTTTACTAGGNGGCNTCTTCCGTTGTGAATTAANTATTTTGTNGTGTAAGCTAAAATTCTTTGATTTTTTTAACCTTCTCTGGTTGTATACAAACGTTAGATCAGCTGTGTCTATTGATGAAA
Gma.13137.1.S1_at	CD397454	At1g60070	1e-107	Intracellular Traffic			TTATTGGTGCGGTTTTCATGTTTCATTCCTTCAATTGAGGAAGGTATGGTTCGANNATCTGGACCACTTTTTGGCTTAAATTTGAAGTCGATTTGGTGGCTTCACATCNTTGTTTTACCTTTTTCTTTTACTTAGGTGATTTATGTACATTAGTACAACATATTCCTGTATGAAAATGCCATAGTCAAATTTTNCCTCTCAAGNCNCTGAGAGTTGTGTCNTNTTGAGTACTTGANGTGCTTTCTTGCTATTTTTTNGGAGGTAGTTGCTCGGTCTTGCTGTCTAAAGTTATAGTGTTGTTGAATGCAATTTGGTATCTTTTAGACGATTGGTATAT
Gma.13352.1.S1_at	M64337.1	At5g01600	2e-80	Intracellular Traffic	Ionic Homeostasis		ATCTTGAATAGCCTTATTATTAGTCTTCATTTACATTT
Gma.6779.1.S1_at	AF532626.1	At1g06400	9e-97	Intracellular Traffic			GTTTCATCTTGTAAATGCCTACACTGGAATCGTGATANCATGTAGAATAAGGCTAGTCTTGCATATTGTTTTGAACAATGTTTACAATTTACAANCATCATCCATACNNAGGATTATGNTTCCGTGAAACGGTCATTCNAAAGACGTGTTTCAAACAAATAGGTCTACATCAAAGTTCATATAGGTTAAGCTTTATTTGAAGGATTTCGATATTTGCTATGCTCTAATTATGGTGCAGCTATTCACAGTTCGAACGTCTGTTTAGAATTTAGTTTTGTTGAAATGCCCTAGACCATATGGATCTTCGTTATCAGGGTAGTTAGTTATTATTTGTTTCTAAAGTTAATAAGTATATTGGTTAAAANNTCCATTGTCTTCTGAAGTTTTTACGGAGA
Gma.13351.1.S1_s_at	L14930.1	At4g09720	3e-97	Intracellular Traffic			AATAGTCGAGTGGTTTCTGAGAAGAAAGCAAAGGACTGGTGTGCCGCAAAAGGGAATATTCCCTACTTTGAAACATCCGCAAAAGAGGATTACAATGTTGATGCTGCATTCCTGTGTATTGCCAAAGNTGCTTTAGCCAATGAGCNTGAACAAGACATATATTTTCAAGGGATTCCTGAGGCGGCAGTTCCAGAGAATGAGCAGAGGAGTGGATGTGCATGCTGATCTGGAGATGCTGAATAATTTTTATGCACTCCCCTTAATGCTGTTGTTGAAACTCTTCAAATTCTTTTTGGTCATTTAGTGTATACTGTATGCCTTGATTGTGCGTGTAAATTGTTATTATGTACCTTGAGGTTTCCATTTTGATAAATTGTATCATTTATTTATTGTAGTCCT…
Gma.6550.1.A1_at	CD402638	At5g54160	2e-31	Metabolism			TGAGGCACTTCCAGACAATGGGAAGGTAATTGTGGCAGAATGCATTCTTCCAGTGGCTCCAGACTCTAGCTTGGCCACAAAAGGTGTGGTTCACANTCGANTGTGATCATGTTGGCACATAATCCAGGTGGGAAAGAGAGNACAGAGNNAGAGTTTGAGGCTCTGGCCAAAGGGTCTGGATTCCAAGGTTTCCGAGTCCTGTGCTGTGCTTTCAANACCTACGTCATGGAGTTTCTCAAAAAGGTTTAAGTTCTTTGGCGTGGATTCATAAGTTGCATTTGAGTTTTGACTTTGAGACTCTGCATGTGGTGCTACTTACAAAAGCTTTCCCGGAAAAATGTAAATTTCTCTTAATTCATTAGGAAAAGAATAATAAACAAGTTCAATGTATACTGCCTT…
Gma.9622.1.S1_x_at	BQ610840	At5g54160	2e-48	Metabolism			TGAAGAACTGCTATGAGGCACTACCAGATAATGGGAAAGTGATTGTGGCGGAATGCATTCTTCCGGTGGCTCCAGACTCTAGCTTGGCCACAAAGGGTGTGGTTCACATCGATGTGATCATGTTGGCTCACAATCCAGGNGGGAAAGAGAGAACAGAGAAAGAGTTTGAGGCTCTGGCCAAAGGCTCTGGATTCCAAGGNTTCCAAGTCCTGTGCTGTGCTTTCAATACCTACGTCATGGAATTTCTCAAAAAGGTTTAAGTTCTTTGGCGTGGATTCATATCAAGTTGCATTTGGATTTTGACTTTGAGACTCTGCTTGGGGTGCTACTTACGAATGTTTTCCCGGAAAAACGTAAATTTCTTCTAATGCTTTATGAAAAGAATAACGAACAAGTTCA…
Gma.10627.1.S1_at	BU548590	At5g17380	1e-178	Metabolism			GTGGATCAATAGTAATTTGACATTTGTACCTTAGCCACCTCATTATTTGGCATGGCT
Gma.4425.1.S1_at	BQ297572	At5g01410	1e-139	Metabolism			AGATTTGTTTCTCTGTGGCGCTTCAATTTGGACTATTAAGGGTTTTAGTTGCTTCTTATATATTATAATAAGGTTATGTTTTTAGTTTTCGGTGTTTTGAACCGTGTTAATTGGATTTTAGAAAAACCAAAAAGAAAAAATAGATNGGTAGCTATTTGGGCATGCCTTGTAATATGCCTATACTTGTTTTTACATATTCAGCGTCGTGGTATTGTGTTGAGTTAGTAGTGCGTTCGTGGTAAACGAGAATCGAATCATTCTTGTTTTTGGATATTCAATCCTATTTTTGGGTTTAATTTTTTTTANTGGATTCAAANNNNNNNNNNNTCAGCTTCTCGTTCTAGTTTTTGCATTAGTTGAACGAGTTCGATTCGAAATTGGCAATTTTTATGTCCGCTG…
Gma.4425.2.S1_at	BF068497	At5g01410	7e-40	Metabolism			GATTTGTTGCTATGTGGCGTTTCAATCTAGATTATGGGTTTGCTAGTGTTTTTAGTTGTTTCTTATAATAAGGTTATGTTTTTTTTTTTTTTTGTGTTTTGAACCGTGTTAATTGGATTTAGAAAAACCAAAAAAAAAAAAAAATAGATAGATGACTATTTGGGCATGCCTTGTAATATGCTGATACTTGTTTTTACTACATATCCAGCGTCGTGGTGGTATTGTGTTGAGTTAGTGCGTTCGTCCTTAAGTAGAATCGAATCATTCTTGTTTCTGGATATTCAATCCTAATTTTCATTTTTGGGGTCAATTTTTTTTATTGGATTCAGAATCTCTTATTTCCANCTACTTGTTCTAGTTTGAACGAGTGTGATTTGAAATTGACAATTTTTGTGTCCG…
Gma.3371.1.S1_at	BQ454173	At5g53120	3e-05	Metabolism			TTGCCTGCGTTCCTGAAGAGAGAAGTGAGCCTGCTGCGTGATCTCTCCCTTCAGTAGCATAGCAATGCATGATTGCTATTGTAACCTCTAAATAAGCTATATTGACTACATTGTCATTGACAAGTGTGGGAGAAATAGGAATCTTGTGTGATTAATTTTAGGTTTTCCCATTCTGTGTGTGGAGTCTGATTAGCTATGTTAATCTTAGTCGATTTCGGATGGCTTTCTCTTGTAAGACGCGTATTGCCAATTATT
Gma.5790.1.S1_a_at	BU549012	At5g23670	0	Metabolism			GATCCATATAATTGTTCTCAGATTCAAGTGAACGTCTCTTGGAGGGAAGTCTGTTCTTATTTTGCCCAGTCATTAGATA
GmaAffx.42893.1.A1_at	BU549612	At2g47140	1e-22	Metabolism			GAGGATTTGGCAGAAGCAGCTTTGTTTCTTGCTAGTGATGAGTCAAAGTACGTGAGTGGGGTCAACCTAGTTGTGGACGGAGGTTACAGTGTTAACAATACTGCTTCGGCTGAAGTAGCTTTAGGAAAGTTTTCTGCTGATTAAGCCCAAATTGTAAGCTTTCATATTTGAGTTCCTTCGACCAAAAGCCAAAAGGTGTGTTTTCTAGTTTG
GmaAffx.91071.1.S1_at	CF806796	At2g47140	4e-49	Metabolism			TGCAAGGCTTTTCCTTCGCCACGGTGCCAAGGTCGTCATCGCCGACATCCAAGACAACCTCGGACACTCCCTTTGCCAAAACCTCAACTCCGGCAACAACATTTCCTATGTTCACTGTGATGTCACTAACGATAACGACGTTCAAATAGCCGTCAAAGCTGCCGTTTCACGCCACGGCAAGCTCGACATCCTCTTCAGTAACGCCGGAATCGGTGGCAATTCGGACTCCTCCATCATCGCCCTTGATCCTGCTGACTTGAAGAGGGTTTTTGAAGTCAACGTCTTCGGCGCTTTCTA
Gma.12160.1.S1_at	BI317786	At4g13250	1e-169	Metabolism			GCAAGGTCGCTGGTTTGATGATCAGGGAAGAGCATTATATGCAGCTGAAGCAGACCGACTTCGTAATTGGGCCGAAGATCGAGCCCGGTTTTCTTTCACTGATGCAATGGAAATGTACACAGAGAACACCTGGTTATCAGTCTTCTCACTTTCAGTTGTCTGTGCCTTCATAATTCTTTCCAGCACAGGCAGCAATTTGCCTGGAACATGACGATGTATTGCTGCCAATGCAAAAATGCATTTGCTTTTGTGGACAGGTAATTGGTGCCTGAAATCATCAAGACAATAGAATGAATCTAAAGTCTANANGTTATAAACAAAGTGGATCTGTTTTTTTCCCACCATGTCCACCTAAACAATTATCATTTGACACNNNNNNNNNNNNNNNNCCTTNAGCTC…
Gma.9179.1.S1_at	BG157597	At1g75020	2e-48	Metabolism			GGGCTCCCTGTGCTGACAAATGTATTACTACCAAAAACAAAGGGGTTTCATGCTTGCTTGGAAGCTCTGCGAGCCTCATTAGATGCAGTATACGATGTGACAANNNCATACAAGAATCAGTGTCCTTCCTTTCTGGACAATGTTTTTGGTGTTGACCCTNCAGAAGTGCACCTGCANGTGCGGCGTATTCCNGTGGAGGAGATTCNAGCTTCNGAAACCAAAGCTGCTTCTTGGTTAATCGACACATTCCAGATCAAGGACCAATTGCTTTCGGATTTCAAGATTCAAGGCCATTTCCCTAACCAACTAAATGAAAATGAAATTTCTAGATTTAAGAGCCTACTCTCTTTTATGGTGATAGTTTCTTTTACTGCCATGTTTATTTATTTTACATTTTTT…
Gma.10801.1.S1_at	AW309829	At3g54020	1e-108	Metabolism			TTGAATGGGAATTCTGGAGACCCTGNAGATTGGAGGCAGAGAACTCAAGTGAATGGCAAGATCATGGAAGATGGCAATACACTCCATGCAGANTCTGCCATGAATGGTGCATAGATATAGGAGCCTCTGCTGTATAAATTGGATCCACTGCAAAGATTGCTGCTGATGGAAAAGCTGCAACCAACCTTCAATTTGAAGGATTTGTTGTCTGAAACATTCACCTGTTAATTCAAATTAGTACGCCCCAATTTGTACTAGTGAAATTGAAACTGGGTTGTGCATTTCAACATTTTGCAGCTCAGATTCCATGTCATGGTTAAATTATCTATACACCATCAGCATGTGCCATAGAAAAATTTCCATTNCCTCTTTTACCNTACATCATTGATCCCACATGCA…
Gma.6038.1.S1_at	U04525.1	At1g69740	1e-168	Metabolism			ACATTCTCTTGGTGAAGCCTGGTCTTCCTTACTTGGATATCATAAGGCTGCTCAGGGATAATTCTCCTTTGCCAATTGCAGCATACCAGGTTTCTGGTGAATATGCAATGATAAAGGCTGCCGGTGCTCTCAAAATGATAGACGAAGAAAAGGTTATGATGGAGTCACTGATGTGCCTCCGAAGGGCCGGTGCTGATATCATCCTCACATATTCTGCTCTGCAAGCTGCCAGATGTTTGTGTGGAGAGAAGAGGTGAAGTTCTCTGATTATGTAGGGCGT
Gma.12181.1.S1_s_at	BG041826	At5g18800	5e-23	Metabolism			GGCCTTCTGAAGGATCTGCACCAAAAGTGCACAAAGGAGATGGATGANTATGTTGGCTGCATGTACTACCATACAAATGAATTTGACTTGTGTCGCAAAGAGCAGCAAGCATTNGAGAAAAAGTGNTCTTTGGAATGAAATTATGCACTGCTGTTGTCGAAAATAATATCACAGGCAATTTGGAGTGAGCAAATGAGCCTGTTTTCCAAAAATTCATTG
Gma.6668.1.S1_at	CD409399	At1g72190	4e-31	Metabolism			AATTGTATATTTCAGGGTGGCCTTCTGGTGAATGTTGCTAGAGGTGGTCTTGTAGACTATGAGGCTGTGATCAACCACCNNNNNNTCNNGTCATTTAGGAGGGTTAGGCACTGATGTTGCTTGGACTGAGCCATTTAACCCTGATGATCAGATATTTAAATTTAAGAATGTTATCATGACTCCTCATGTTGCAGGCGTTACAGAGCATTCTTATAGATCCATGGCTAAGGCTGTTGGTGATGTCGTTCTTCAACTTCATGCCGGGCTTCCTTTGACAGGGATAGAGTTAGTTAACTGAATTAGTGCCAACAATTCATTCCAGTATCTTCAACTAAATGACTTTTATAATTCAAGATGAATTTTCTGAGGTGCAAAAACACTTAATATTTTGTAAAGAAA…
Gma.16697.1.S1_s_at	BQ627551	At4g27070	3e-24	Metabolism	Amino Acid Biosynthesis/Metabolism	Tryptophan Biosynthesis	TATCTAGAGAAAGTGTGTCCAACCCTTGCTAATGGAGCCAAGGTTGTGGTTAACTTCAGTGGCCGGGGTGATAAGGATGTTCAAACTGCTATCAAGTACTTGAAGCTTTGAAAGGATCAAAACTTGCTGAGTGAGCTTCATTTTCATACTTAGAGACATAATTAATACAATTTATTATTAGACCAAGTTAAATAGTCATGTATATTTGCATCAGAGAACTGTTGCTATTCAATCCTCAAT
Gma.1137.2.S1_x_at	CA852403	At5g48930	1e-105	Metabolism			TGCAACCTGATCTAAAAGCTCTCGTTCGCGGGGCTCATACTTTCAAGTGTCCAAATCTTGGTATCACTAGCTGGACTAGGCTTCCAATCCATGATGCTGACTTTGGTTGGGGAAGGCCTATATTCATGGGACCTGGTGGAATTGCATACGAGGGCCTGTCTTTCATAATTCCAAGCTCAACCAATGATGGGAGCTTATCTGTGGCCATAGCTCTTCAGCCCGACCATATGAAGGTGTTTAAGGATTTCTTGTATGACATTTGAGGAATCATTGGCTGTCAGCCATATGGAACGCCACAATGTTTCTAGGTGGTGTTTTTATCCCCCCCGGTACCTTTTGTTATCTTTAGATGCTTTTGACCAACGGTATGCAACTGTTAATGGGACTCATTTCAGTTTT…
Gma.10227.1.A1_at	BE020065	At5g61290	2e-30	Metabolism			GATGGAATCCATCGAGGAGTTCTATCATTCAAATGAAGTAGCTGGCATTCCTAAACGCTACACCCATGTGGTTGATGCCTTTGATTATTGTGACAAATACGGAGAAAATGTTGGATTCCCAAAGACAGAAGAATGGAGGAAAGAGTTGTGCATATCAGCTGGAATGAACGCTTTTGCCAACTTGGAGACATATCGTGATTCGTGGAATGATGATATTGATGAGAAGCTTCAGGAGGCCCTTCGAAGTCCTTACTTCACTCAACTTGAACAACTTTCTCTGTAAAACTCGA
Gma.6551.1.S1_s_at	BM527540	At4g20870	9e-24	Metabolism			CAAAGTCTGATGTGCCCAAAAGTCTNAAGAAATATCACTTNAATCATCATTATCGGCTCCAGAACTATGGCTTTGGGATCACNTCACCNCTGTGGGATAAAGTTTTTGGAACGGTTCCTCCTCCTCAATCAAANGGGGATGCCAAACGTAGATAAGTTACTGTCAAGGTTGCATTTGTTCATTGGTTAAGNATAGTTCATTCAGGAGCTTCANACGAGATNTGTTGATAATTNCATTATTCATGTCTTGNTTGTCTAATTATTTTGCTCCNCAATTGATGTTTCTGAGGGTTAACGTGCCACCATCTTGTGTCAAA
Gma.11028.1.S1_at	BE823084	At5g14780	1e-121	Metabolism			ATTGTTATCAACACCCCTCTCACTGAGCAGACAAGGGGATTGTTTGACAAAAATAGAATTGCNAAGTGCAAGAAAGGTGTCTTGATTGTTAACAATGCTCGAGGGGCAATTGCGGACACNCAAGCAATTGCNGATGCTTGCTCCAGTGGCCACGTTGCAGGTTATAGTGGTGATGTTTGGTTCCCACANCCAGCTCCAAAGGATCATCCATGGCGNTACATGCCAAACCATGCCATGACTCCTCATATTTCTGGNACCACCATNGATGCACAGTTACGTTATGCTGCTGGNGTCAAAGACATGCTTGATAGGCACTTCAAGGGTGAAGACTTTCCAGAACAAAACTACATTGTNAAGGAGGGTCAACTTGCNAGCCAATACCGNTGAAGTNGTGTGTGT…
GmaAffx.43676.1.S1_at	AW234124	At5g50950	1e-19	Metabolism			GGACCGTCTGATTGACTAACTCGCAATGTTTTGTTCTAATAATTCCTTGTTTCATCATATCGGCTACATTTGAGGTAGTATTTTTTTAGCTACACCCGTTGATTGGTTTGAGAAATGGCAACCCAATGAACAATAATTTGGCTTCCTCAGTTGATATTCGCGAGGGAAGAGTTCTTCCAAATTTGTAACGAGA
GmaAffx.64716.1.S1_at	BE822506	At5g64460	1e-08	Metabolism			GGATCATTTTCCTACAACTGTTAAACATTGATGACCATTGACCAATCTAGCCAATCCTGGGTGATGTTCATCAGTTTATATTTTGAAGTAAATGATTGATTCGTTTCACATGTCCTTACAGCTTTGCTAATTGTGAACTTCGCTCCATGGTCATTGTGGATAGAGGGTGAGTTTGTGAAAATATACATAAAAAAAAAACAGGTTTCTTTTTATCTTAATCGAGATTTGTTTGTTTTTTCTCCAGTATGATAGGATTGGAACAATCAACCACTAACTATCCAGGCAAGATACCTTCAGGGCTGGACCTCCCTAGTGATGTTGCAGATGAGAAGTCTGAGAAATAATGGATTTGGCTTCTTCTACTTGTTTGTATGTGTTCAGGACCATTCAAGCATTGGT…
Gma.15323.1.S1_at	BQ786753	At2g35120	5e-67	Metabolism			GGGAAAGCTGCTAAATTACTTATTCCTTTTTCTCCTTGTGTCATGGTTTGACCACTGCTCTATTTTTATTTTTCATAAGCTTCTGAACCAGTGGGATGATATTTTTCAC
Gma.2075.1.S1_at	BI969313	At2g35120	1e-67	Metabolism			TGATGAAAATTCTGCAACCGTCGGCATAACTGATCATGCCCAAGATCATTTAGGTGATGTTGTATATGTTGAATTGCCAGAAGTGGGAGCAGCTGTAACACAAGGAGGTAGTTTTGGTGCAGTTGAAAGTGTGAAGGCAACTAGTGACATTAACTCTCCTGTTTCAGGAAAAGTTGTTGAAGTTAATGAAGCGCTTAACAGCTCTCCTGCTTTGATCAATTCAAGCCCTTATAAAGATGGATGGATAATTAAAGTTGAAATAAGTGACAATGGTGAACTAAACAACTTGATGGATTCAGATCAATACTCCAAATTCTGTGAAGAAGAAGATTCCAAGCACTGATGATCTTGGCAAGATCTTTCAGCACTCTTCAATCTCCATGGTGTAGATCATGTTTT…
Gma.620.1.S1_at	CA820071	At1g78380	2e-77	Metabolism			TCCATTCGACACTTGGTTCAAGACTTTTGGCAGCCTCAACATAGAGAGTGAGTGCCCCAAGTTTGTTGCTTGGGCCAAGAGGTGCCTGCAGAAAGACAGTGTTGCCAAGTCTCTTCCTGATCAACACAAGGTCTATGAGTTCATTATGGACATAAGAAAGAAGTTCGACATTGAGTAGGTTCATGTTGGATTTTAATAGCCATAGTGACGTATTGATCATTCTTGGCCTTTCAACTAAATAGTATTTGTGTAGTAAATTAAAGGCACTTGGATGTACCAAACTTCATGCTTTTTGTAGGAGTGCGTAGGTTT
GmaAffx.1715.1.S1_at	BQ611844	At2g32020	7e-33	Metabolism			AAAAGGTTGCGGCTTTTTGCTCTTGGGATCCTNACAGCAGCAAAGACGAGGGCATTAACTTCATCCAGAATATAGCAAGCAAGTTTCTGTGGTGCAGAGCAATATGCCTCAAGGATCGTGCTATTGGCTGTATTTCCCTGTCCTCGAATTCAGAGCACGATAAAAGCAGGAGCAGATCCGCGGAACTAGGGTATGTGCTGGGTTCCAAATACTGGGGCAAAGGGGTTGCCACGGTGGCTGTGAAAAAAGTGGTTAAGGCTGCTTTGTCTGAGTTGCCACACTTGGAGAGGATCGAAGCTCTTGTTGATGTGTTCAATGTTGGGTCTCAGAGAGTGCTGGAGAAAGCTGGTTTCCAAAAGGAGGGGATTCTCAGGAAGTATATCTTCCAAAAGGGAAAAC…
Gma.11261.2.S1_s_at	AW318293	At3g06580	0	Metabolism			TTTGTCGTAACAATGGTGCTCTTGGGGCAAGGCTTACTGGAGCTGGATGGGGTGGTTGTGCTGTTGCTTTGGTGAAAGAGAGCATAGTTCCACAATTTATCCTTAATTTGAAGGAATGTTTCTACCAGTCTAGAATAGACAAGGGCGTTATTAAGAAGAACGATCTTGGCCTTTATGTATTTGCTTCCAAGCCATCAAGTGGTGCTGCTATCTTCAAGTTTTAGTGTTCTTTAACCCGCTTCCCTTCTTATGGCTGCGACTTTCTTCCCCTGAGATCTAGACACAGATTAGATGCAATTTCTGATGGAGTAAGATTAAATGGTACCATATTTTCTTTGTTAAATTATTTTAGTTGATACGATGAAAGCAAATAATGATAATATTGCCGAACGGCTTTTA…
Gma.4032.3.S1_s_at	BQ253787	At4g24620	0	Metabolism	Sucrose Biosynthesis		AGAGCATTGATTGTCGAAGGCAGCTGTGGTTCACCACGCAGCATCAAGGTTTTTCTTGGGGAATGTAANNNNGATGGGTTGTATGCATGAGTTAGACGACTACCAGAATTCATGTTTTGGTAATGTTGCAATTGTGTTTGAATACACGGACCAACAGAAGAGAAGTTGCCTGCAATAATTTGGTTTCAATGTTGAATCTCCATCATTAACGAAAGTGGAAATTTCTGTTAAGACAAATTCTTGAAAGTGTTTTGGTGTTCTGAATTGGAACTACGTGTAACCAAATGGAGAATCC
Gma.1419.1.S1_at	BG155556	At5g18170	0	Metabolism	Amino Acid Biosynthesis/Metabolism		GAGGCGTTACAGTTAGCTACTTTGAGTGGGTTCAGAACATCCAAGGTTTCATGTGGGATGAGGAGAAAGTGAACAATGAGCTAAAGACCTACATGACCAAAGGTTTCAAAGATGTGAAGGAAATGTGCAAAACCCATGAATGTGATCTTCGTATGGGAGCCTTCACCCTGGCAGTTAACCGTGTCGCACGTGCTACTGTCCTTAGGGGCTGGGAAGCTTGACATCCATTGCTTCTGCTTTCAATAAATTAATTAAAGAGCTCCCACTCTCAGCAACACTTCACAAAGTTTTTGTTGCTTTCAACTAATGTGTTGGGTGAATCGTATTTTCACGCCAAATTTTCTTTNAATAAATTAGTATAGTATATAAATCTTTTTGTAACTACATGTGTGGTTCTAT…
GmaAffx.43920.1.A1_at	BU761199	At1g60140	4e-08	Metabolism	Trehalose Biosynthesis		TTCAGGGCCTTGCTGCTTCATCCAATCCAAAACCCAGGCNTCTTGCTCATTCTCAAGTCTNTTTTGAGAGCACAGTTTGAGTTATAGANAAGTTAAGACAGCANTTATTGGTCNTCTCCTGTGAATCNATGAAATTTTTGGTTATTAATCTTAACCTGACAAACAAATGGNGCGGATCTAATTCTTTTTTGGGCTCCTGANCCGGTTTGCGTGGCATCNATCTNGGNGGNNTTTTGTTAAATANTGCGGTTCATTGNTGCCTNACAATTCTTCTCTTGTACATGGTAACATCANTTGTTATATTTGCTGGTGCCACCGAGAGCTTTAGTTGTGCTTAGAACTGTTAGATCNTTATCATCGCTGTTTGCACTGAACAATGGGGNCACCAAAACCTGTATA…
Gma.5513.1.S1_x_at	AW310453	At5g02230	1e-111	Metabolism			TCAAGATAGCCAACCTTAATCCACANAGAACTTTGTTCTTTGAGGATAGTGTCCGCAACANACAAGCTGGAAAACGTGTGGGTCTTCACACTGTGCTGGTTGGAAAATCTCAGAGAATTAAAGGAGCAGATTATGCATTAGAAAGCATCCACAACCTTAGGGAGGCAGTGCCAGAACTATGGGAAGATGACATAAAATCAGAAGTTGCTTATCCTGGCAAGCTTGCTGTG
Gma.7251.1.S1_a_at	BU548031	At5g03290	2e-94	Metabolism			GGTATTGCACTTGCTGAGGCTGTACATGGTTCNGCACCTGATATTGCTGGAAAGAATTTGGCNAATCCAACTGCTTTACTGCTNAGTGGTGTTACAATGTTGCGCCATTTGAACCTCCATGACAAAGCAGAACAGATTCAAAAAGCCATCCTGAACACAATTGCAGAAGGGAAGTACCGAACAGCTGACCTCGGTGGCAGTTCAAAGACAACTGAATTCACAAAGGCAATTATTGATCATCTTTAGATTTTGGTTTTGNAGTCAGCAAGAAATTCTTGCTTATGATTTTGATTTTCAGTCAATTTTCTATTTATTAACCCAATTAATCCGAAAGAGTGGGATTACCTCAGCTTAAAGGAAAACTCACCCATGT
GmaAffx.92014.1.S1_at	CF807739	At2g18230	8e-73	Metabolism			TGAATAGCCAATTTCAGTGATCTCCAATTATGTAA
Gma.10976.1.S1_at	AI856391	At3g53620	3e-99	Metabolism			AGTAAACGACTTTTTGCCTGCCTCAGCTGCTTTNGAAGCGGTTAATAGATCCATGAGCTTGTATGCGGACTACATAGTGGAGAGCTTGAGACGGTAGTCGTTGATGAATGATGCACGTCAAGGATTTTTAACTGACGGACCAATGGAAGATGTTTGCTTGAAAAAAGGCTGCATTATCAATATTATGTAGGAATAAAAAAAAACATTTTACTTTAGCTGCCTCTTAGCTCATGCATGTTCTACAAACTNNNNGTGCTTAATTTCAAATATGTCATCCCTGCAATATCAAATNTACCTGCCTCTTATAGCACATGCACAATCCAATATCAAATGTTTTAATCNNTGTATAATTTTATATTCTCACCCTTTCTATTAG
Gma.1558.1.S1_at	BE823140	At3g02870	1e-113	Metabolism			GTAGATGCCTCTACCGATAGGATTAAAAGCTTACTTTTCAAGGTGAGATCTCTTCGAATGAGTGGCTCCTGTGCTCTGAATCTNTGTGGAATTGCATGTGGAAGGCTGGATGTATTCTTTGAACTTGGCTTTGGTGGTCCTTGGGATGTAGCAGGTGGTGCTGTCATTGTTAGAGAAGCTGGAGGTGTTGTATTTGATCCGTCCGGTGCAGATTTTGACATAACATCTCAGCGAGTAGCAGCTTCAAACCCTTTCTTAAAGGATGCACTTGTTGATACTCTGCGCCAAATGGTGTGAGAAATTTACTATTAATCAATGGCAAGAACTTATCATATAAGCCATCTTTGTTAGTTCGTTTAGCTTTTGCTCA
GmaAffx.53273.1.A1_at	BU549766	At2g26800	2e-23	Metabolism			ACTGAGGATGTCGTTTACATGCTGAATGGACTTGGAGTGAAAACAAATGTGGACCTTGGAAAGCTTATGCTTGCTGGGGATTTCATCTGCAAGCATTTAGGACGTGCATCTGGTTCAAAAGCAGCTACTGCTTTGAGTAAAGTTACAAGTCATGCCTCCAAACTATAAGTTACTATAGCTAGTCATGCACCTGCATGATAGGCACATTGTTTGGCCACTGTAGAATATGTATTTATGTTGGTGTTTACTGTCCCGTGGGCCCTGCCTATAGAAAAGAGAGAGCCAGCAAACACAATTGTAATGCTGTTCACTTCTGCTTGTGTTCTGAGTCAGTTTAGTCGCTTTG
Gma.11166.1.S1_s_at	AW705829	At1g55020	1e-156	Metabolism			CTCTCATTGACAAATAAACGTGCAAACTTATGTGTGCATAATTTTCTTATGTATGCTTAAGTTTTGTAATTGGATGCTATCTAGTTTTTCATATCTAATAGGGTGTTGTGTCAGTTTTTATGTATAGTATTGTGCTCCT
Gma.10759.1.S1_at	BE822425	At4g23850	1e-108	Metabolism			ATATTTACGGTCAAGTTTCTTCTATTGAATCTATATGGGTTTATGGAAACAGTTTTGAGGCCTTCCTTGTGGCTGTTGTTAACCCCAGTAAGCAAGCACTTGAACATTGGGCCCAAGAAAATGGTATATCCATGGACTTCAATTCTCTCTGTGAAGATGCTCGAGCAAAAAGTTACATAATTGAAGAGCTCTCAAAGATTGCGAAGGAAAAGAAGTTGAAAGGTTTTGAGTTTATAAAAGCAGTTCACCTTGACTCAATTCCATTTGACATGGAACGTGACCTTATCACTCCAACATACAAGAAGAAGAGGCCACAGTTGCTTAAATACTATCAGAATGCCATTGACAACATGTATAAGAGTGGAAGTAAACCCAGTGCCTGAGACCTGATTTGGGAGA…
GmaAffx.377.1.S1_at	BE822954	At5g27450	2e-32	Metabolism	Lipid Biosynthesis/Metabolism		AGGCATCCAGATATAATGGCTTTTGTGTTTAGTGCTGTTGATTCTATTAGCAATGAATTGACTTCCATTCTCAAGTCACCTACACCAGATGAGCTCTCGGTAACTGAGAAAGAANAGAAGATAGAAGAACTAATGGANATGAATNAAGGTNTGCTCCAGTCTATGGGGGTCAGTCATGCNACAATANAAACTGTTCTTCNAACAACATTGAAGTATAAGTTAGCCTCCAAATTGACAGGAGCTGGTGGTGGGGGNTGTGTTCTGACACTGCTTCCAACATTGCTATCAGGCACCGTTGTTGACAAAGTAGTTGCTGAACTGGAGTCATGCGGGTTCCAATGTTTCATTGCNGGAATTGGCGGGGGAGGTGTTGAAATTANCTTTGGGGTGTCATCTTGA…
GmaAffx.62051.1.S1_at	AW307327	At2g36230	2e-75	Metabolism	Amino Acid Biosynthesis/Metabolism	Histidine Biosynthesis	AGGAGCAAGCCATGTCATTGTGACATCTTATGTATTCAATAATGGACAAATGGATCTTGGACGGCTAAAAGATCTTGTTCAAATTGTAGGAAAAGACAGGCTTGTGTTGGATCTCAGTTGCAGAAAAAAGGATGGTAAATATGCAATTGTCACTGATAGATGGCAGAAGTTCAGTGATGTTTTTGTTGATCCTGATGTAATGGAATTTCTTGCCAATTTTGCTGATGAGTTTCTGGTTCATGGTGTTGACGTTGAAGGGAAGAAGTTGGGAATTGATGAAGAGCTTGTGGCTTTGCTTGGCAAACATTCACCGATTCCTGTTACTTATGCTGGTGGTGTGACTGAAATGTCTGATCTGGAGAGGATAAAAACTGCCGGAATGGAC
GmaAffx.80497.1.S1_at	AW734706	At2g45310	1e-36	Metabolism	Nucleotide-Sugar Metabolism		ATACTTCCCCTGTGCCTGTGAGTGAGCTTGTGGCGATTCTGGAGAAGCTTCTTAAGGTGAAGGCCAAGAAGAAGGTGCTTCCAATGCCCACCAATGGAGATGTGAAGTTCACTCATGCTAATATTAGTTTGGCTCACAGGGACCTTGGGTATAGGCCCACCACTGATTTGGAGACTGGGCTTAGAAAGTTTGTGAAGTGGTACCTTGAATTTTACTCCAAGAAGNAGCTCTTGGTGAATGTTGATGTGATTCTTTTGCTTTGCTGCCCCTATTCTTTTCGCTCTGCTTGTAATTTGGAGGATAGAGGTTTTACCGTTGTGTTAGGGGTTACGGATGACCTTGCATCATGTTCTGTTCTGTTCTGTGCTGTCTTTTTTTTTCATCTTCGACTGTATGCCT…
GmaAffx.2833.1.S1_at	BQ610503	At3g23820	0	Metabolism			AGGAATATCACCTTGACAATGAATAATCACCTACGTACGTACCCAAGCCTTAATTATCCTCACACCACATGCCCTTGTTTTTGTTTTTACAAGAAACAAAGAAAAACAAATAATTCAAATACCTACCTTGGATCATTTTTCTTGTTTTTTCTTCAATTATTACTATTATTTTTTCTTAATTATTGTGGTGGTCCGTGTCCATGGATCCAAATGCATGTTGGTGTAGCAATTATACATAATATAAATATCGGGTATATATAGATGAGGGATATATATGCATATATAAATGTCAGGGAAACAAACAGAAAGCAAAAGCAGCAAGGAAGTGTATGTAATGTAATGTAATGTAGATCTGTAAGGAAAGAGAAAGAAAGGTGTAATAATGCAGGGTGGGGTCTG…
Gma.11299.3.S1_a_at	BG045664	At5g28840	8e-51	Metabolism			TCTCAATTCACTTCCTATCCCCTTCTTCTCTCTCAAACAGAATGGGAAGTGCTGGAAGAACTGATTATGGTGCATACACCTATGAGAATCTTGAGAGAGAGCCTTACTGGCCATCAGAGAAGCTTAAGATTTCCATCACCGGTGCTGGGGGTTTTATCGCATCACACATAGCTCGGCGCCTCAAGACAGAGGG
Gma.16174.1.S1_at	AW309513	At4g14880	1e-13	Metabolism			GTTTTGGAGAGCGTTATCTATCGTCTGTGCTCTTTGAANCCGTGAAGCGAGAAGCAGAGAGCTTGGTCTTTGAGCCTTGAATGTCAAGTCATACGAGCCATTTGCTGCTTCTCAAGTTGCATTCTGTCCTTGGGTTGTGTATATATTTTTTCTCTTATGGATCTAAAAAATAAAAAGGATTTCTGTTTGCTTGTTAATTGACTAAGATTCAATAAAAATATAGTAGTTTGCTGAAANNNNNAAANNNNNNCATAATTTGTAGATCATGATGCCGCGAACTCATGCTTGTACTATTTTATTTACTAGTTAAATTTTGCTTCTTAAAACTTGTAATGGA
Gma.17998.1.S1_s_at	BI970989	At3g61440	1e-130	Metabolism	Amino Acid Biosynthesis/Metabolism		ATAGGTAGTGGAGGCACAGTCTCTGGGGTTGGACAATATCTTAAATCCAAAAATCCTAATGTTAAGATATATGGAGTGGAGCCAAGTGAAAGCAATGTGCTGAATGGTGGTAAACCTGGTCCTCATCATATAACTGGCAATGGNGNTTGGATTCAAACCAGACATATTGGACCTGGATGTTATGGAAAAAGTTCTTGAAGTTAGCAGNGAAGATGCAGTTAACATGGCTAGGGTGTTGGCATTGAAGGAAGGACTCATGGTAGGGATATCATCTNGGAGCTAACACAGTTGCAGCNCTCAGATTGGCTCAGCTGCCTGAGAACAAAGGNCAAACTTATTGTGANCTGTTCATCCAAGTTTCGGCGAACGATACCTGTCATCTGTCCTGTTCCAAGAGCT…
GmaAffx.54447.1.S1_at	BG406373	At2g19570	8e-32	Metabolism			TTGAAGCTCCCCTTCTCTTGGAACCCCACCACAACACCCTCACCCTCACCCTCNACCACCAACACCTGCCCAATTATAAGTTGAAGACTGCGGCTCTGGAGGCCGCCAACAACTCTCATGCACCCTACAGTGGCTCCCCCTCTGGTGTGGCTCTTCTCGACTGCCATGGCAATGTTTTTAAAGGTTCCTACATGGAATCCGCCGCCTTTAATCCCAGCTTGGGCCCCGTTCAGGCAGCCCNTCGTCGCNATTCGTCTNCCGGCGGCGGCGGCGACTACGACCAGATTGTGGGTGCGGTCTTGGTGGAGAAGGAGGATGCCGTCGTTAAACAGGAGAGCACGGCGAGGTTGTTGATTAACTCCATTTCGCCCA
Gma.4374.2.S1_x_at	BQ454274	At2g45570	2e-65	Metabolism	Cytochrome P450	CYP76C	GAGCTATTGCCATTTGGTGCTGGGAGAAGGATGNGCCCTGGCTACCCTCTTGGCCTTAAGGTCATTCAAGCAAGTTTGGCCAATTTGTTGCATGGATTTAACTGGAGACTGCCTGATAATGTCAAGAATGAGGATTTGAATATGGATGAGATTTTTGGGCTCTCTACACCTAAGAAAATACCACTGGAAACTGTTGTTGAGCCTAGGCTTCCACACCATCTTTATTCTCTCTGAGCAGTGCCCTTGCACAAAGGGTTTCTCTCTAATAAGATTGCTGTAGGAATAAAATGGGTCTTGTGTGAGCTTATGTTTGTCACACTGGATTGCAATGAATTTTTCTTTCTTNCTCATNNNANNNTTATAAANAATAAAATAAAAATGATGTTGTGGTGTTAGAAT…
Gma.6727.1.S1_at	Y10493.1	At3g26300	1e-103	Metabolism	Cytochrome P450	CYP71B	AGATCCCCAGTATTGGAGTGATGCAGATAGGTTTATCCCAGAGAGATTCAATGACAGTTCTATCGATTTCAAAGGAAATAGCTTTGAGTATATACCTTTTGGGGCAGGAAGGAGAATGTGTCCAGGCATGACATTTGGATTGGCTAGCATTACGCTTCCATTAGCTTTATTACTCTATCATTTTAATTGGGAACTCCCAAATAAGATGAAACCTGAGGATTTGGATATGGATGAACACTTCGGAATGACAGTTGCAAGAAAAAACAAGTTGTTTTTGATTCCCACTGTTTATGAAGCTTCATGATACACGTATTTT
Gma.2216.1.A1_at	BM885752	At3g46940	2e-11	Metabolism	Nucleotide Biosynthesis/Metabolism		TGTTCTGTTCTCTTGGTAATTTTGTAGAGCAGTTGGTGGGTGTAATCGAATGAAGAACCTGTCTTTATCTTTTGGCTTGTTAGTGTTCTGTGTGTGTCCAAGTTATGATGGTATTGATTTGGTCATCGGGGAATGGCAGTAGGTATTAGGTAAATGCTTTCAAAGCT
Gma.5160.1.S1_at	AJ563382.1	At5g11880	6e-10	Metabolism			GGAGAATCCTACATGCTGCAGGGATTTGAATTTGAAGACTTACCCTAGCACCGTGTTTGGACCCACATGCGATTCTATTGATACGGTTCTGAGGGATTACCAGCTCCCGGAACTGCAAGTGAACGATTGGCTTGTGTTCCCGAACATGGGTGCCTATACGACGTCGTCCGGGACTAACTTCAATGGGTTTAGCTCCTCAGCCAAGTCCATATTCCTTGCATGTTCGAGCCCGGAACACACCATGTTCTAATCAATACAAATCCCAAACTATCCCTTGCTCAATGTACTTACTTATTTTATTATCAACTTGTCTCTCTTTTGGTTTCGGAAACTCAATAATGGCGGAATGGCTGCTCGTGGACGCCGCGTGGTTTCTCTCTTGATTGTATTACTACTATC…
Gma.7008.1.S1_at	AW349709	At2g47420	1e-130	Metabolism			AAGGTGGATTCCTCTGTGGTGCGAATTGAGCCCAGGAAACCCCGTATTGAAGTTAAGCAAAAGGAGTGGGATGGGTTTTNNCGGATTTGTTTTAACAGGAAGAACAAAACACTTGGTTCGATATTTANGCAGAAGAGTGTGATCTCCTTGCTTGAAAAAAACTATAGGACTGTGCGGGCACTGGAACTTGGGCAAGAAGATTCACTAAAGGAAGTGGATGCTAAAATGGACTTCTCTAGTTTTGGTGATGATCGAGGTATGGAGATGGATGATNNNGGAGCAGATGATGATGAAATGGAAGTTGAGGATGGGGAAGCAGATGAGGTGCAATCTGAATTCAAGGACAAGGTTTTGGGTGTTCTGAAAGAGGGAGATTTTGAAGAGAAGAGGTCATCCAAG…
Gma.3953.1.S1_at	CD412209	At3g58580	1e-150	Metabolism			TTGTCTTTTTCCCAGGTATCTCCTTNNNNGGNNNNNNNNNNNNNGNNNNNCCTTGCANTGATCTGCTNTGTATTATGCCACCTTTGTCTCATAGAAAAATTATGATAANGCCTTACTGATTTTCGCCCATATCTTACCCAATCTTTTTTCCCTATAAAGTGAAAATTTTCTTCGTNCGTTTCCATTGGTTCAATATGTAGCAATTAATCGCCCCATTCTCAAGCCATTCCGATCTTGTGGCTAATGAGCCTTGGGCTTTANNANCTCACTACTGTAGTGATAATATTCACAGCTTAGGTTATTTTGTATCTGCTTGATCATCAGAAAGTAGACAAATTCGAAACGGTATATATTGATATTAAACAGAAAAGTGTTTATGAGAATACTACCAGTAAGAAG…
Gma.4325.1.S1_s_at	CD409538	At1g06550	3e-56	Metabolism			ATTCCTCCAAAAATGTCATGGATTTCTCTACTTTCTGGTATGCATTAATCCAGGCTACTGTTCTGAGTTCTTGAATAAACTTCAACATATGAAAGAAGTTCATGAAGAGTCCTCTAAGTTTGTTGTTGCTA
Gma.15037.1.S1_at	BE347885	At5g27320	2e-06	Metabolism			TGCTCCCGCTATTAGGTACTTACATGCTACTAAATGTGTCGTGAGATTTGGTGTAATCAGCATATAGCTGTGTGATGTTTTTCCTGAGCACATAATGAGGAAATTGGGTGCTGCGGATAGGTGANAGCTTTTTAGGACAAAGGGAGCTCAGGTCATGTTTATGGGAACCACCAAAGTTGTGATTACCCACTCTGACTTCTAGCCAAAAAGGAGAGGAAGGCCTTATTCTATTTCTGGGCGTGACCTTGATGCCAATCAGGTGGGGCTTGTCGTTGTCTGGCTAGTGTTATATATATATATATATATATAACTAATTTTGGAACTAGGATAGGAAAATATCAATGATATGTTGGTGCTGTTAGGTTATATACGTCTGTGCTATCTTCATATGAGTGTTTT…
Gma.15179.1.S1_at	CD402104	At3g48560	2e-83	Metabolism	Amino Acid Biosynthesis/Metabolism		TGGGAGGATCGGTTCTATAAGTCTAACAGGGCTCACACATATCTGGGAGACCCCTCTAATGAGAATGCCATATACCCCAATATGTTGAAGTTTGCTGATGCTTGTGGGATACCGGCAGCTCGTGTGACCAAGAAAGAAGACCTTAGAGCGGCAATTCAGAAAATGCTGGAGACCCCTGGCCCCTATCTTCTNNNTNNNNNNNNNCNNNNNNNNNNNTCAAGAGCATGTCTTGCCCATGATTCCTAGCAATGGAACCTTCCAGGACGTGATAACTGAGGGTGATGGCAGGACAAGTTACTGATTTCCTGAGCATATTTATCTTCATGGTGGTTTTGTAAAAATAGTAAGCTAATATAGCTTCTTAAATTTTGTCTTCACGTTGGCTACTAATATAGGCTG…
Gma.4468.1.S1_at	CD414593	At5g48230	4e-74	Metabolism			GTTGAGCTTCAGTAAGACCTATTTCATGTTCAGTAGATGTCCTTTTAAGAGCCAGCGTTTGATGCAAAGCTCAAAAGATCTTGCCTCCCTCTTTAGCAAGCGAACATGCAAGTTTCAAATTTATTACAAGGACAAGACCGAAAGAGAGCGAAATTTAGCTACAT
Gma.8414.1.S1_s_at	AF007100.1	At5g35360	0	Metabolism	Fatty Acid Biosynthesis		GTGATGTCAGAATTGCTTTTTGTAATCGCCGTGTTGTCAGTGCCTCGAAGTGAATGTTTTAATGAAATTTTGATAATTAGTCTCGTACATTCCNTTTCNTCACATNATTATATTGTAAAATCAATTAATTCANGTTTGATTTCATCCCNAATATTATTGCAAGGAATTAAGAATAGGTCCTTGCATTTTTTTCGGAAGTCATAGTTGTCACAATGGTTGGTTTAGAGGATCTTGTATTA
GmaAffx.17910.1.S1_at	AW317784	At4g14930	1e-58	Metabolism			AACGAGGCACGATTCTGGTCACCAACGACGACGGAATCGATGCNTCCTGGCTTAAGNGCATTGGTTCACTCCNTCGTCAACGCCAACCTTTTCAACGTTCTAGTGTGCGCTCCTGATAGCGAGAAATCAGCTGTTAGCCACAGCATCACTTGGCTCCATCCAGTAGCTGTTAAGCAAGTACAGATCGAGGGAACCACCGCATTTGCNGTTTCTGGGACTCCCGCTGATTGTGCTTCTCTAGGGATTTCCAAAGCTCTCTTTCCCACAGTACCTGATCTGGTGGTCAGTGGCATAAACAAGGGTAGCAACTGCGGTTATCACATTGTTTACTCNGGCACTGTAGCTGGAGCTCGAGAGGCCTTCTTCAATGATATACNTTCTATCTCCATTTCATATGAC…
GmaAffx.38388.1.S1_s_at	CA852972	At1g69640	0.005	Metabolism			GGTTTTGAAACTAGACCTTGCAAAGATTACAAGGATGATTAACTTTTTTGCTTGATGAGCATTCTTTATCTGTACTAGTATTGTTTTCCCTTGTTATGAGCAGCTTCTCCTTTCTCTTGTGATGCCTGTATATATACATTTGATGTGTCCTGTTCGATATTTTTGTTTCCCTTATGTCCATACTAGATAGACATAATAAAGGAAATTGAGGTGCTACCTATTACCA
Gma.1532.1.S1_at	CD409023	At5g51260	5e-47	Metabolism			ACTTAGTCATGTAGGGGCACTGAACAATGTTGT
GmaAffx.1968.1.S1_at	BE657555	At3g05020	1e-29	Metabolism	Fatty Acid Biosynthesis		AAACATGTACCAGATAAAAAATTATTTCTGCTAGACATGCATAGTTTTATATATTTTAGTATTGCGGGGTATAGTCTGAAGTGTTTTATAT
Gma.2281.1.S1_x_at	BI317540	At1g54580	9e-27	Metabolism			ATGCCGATCAATATTTATGGTGTGGGGNCAATTNNGAGTCTCGAGTGTTTTAGTTGTGAACTCTGTTGNNNCGTGATTAAANCAAGTCTGAGAAGAAAAACAAATTAGTCCAACCTTTTGTTTGTTTCTGGAAGTTAGTTATATNAAGTTGTGTTTTTGCNTTAANGGGTTTTTGTCAATGATATGNTAATTTTAATAGATGTAGATTTATGTCAATGATATTGTATGTTAATTTTATTCAGTCTCGTATCTAGCTGAATAATTAAGAATTATACTACGTCATGCCTATAACACTTGAGGTGCTTAAA
Gma.3717.1.S1_a_at	AW350536	At1g01710	1e-160	Metabolism			GTGCTGTGAGTCTGGACCACTCCATGTGGTTTCACAGACCTTTACGAGCTGATGACTGGATACTATTTGTGATCTTTAGTCCTACTGCCAATAATGCACGTGGCTATGTCACTGGCCAAATGTTCAATCAGAAGGGAGAGCTACTTGTATCAGTGGTTCAAGAAGGTGTAATGAGGGAAGTTATTTCTGC
Gma.4269.1.S1_at	CD407626	At1g27450	7e-82	Metabolism			CATAGATGATCTTATTGCCACTGGGGGAACGTTAGGTGCTGCAATTAAGCTTCTAGAACGTGTTGGGGTGCATGTTGTGGAGTGTGCTTGTGTGATTGAATTGCCAGAGTTAAAGGGGCGGGAAAGGTTGGGAGACAAGTCGCTATTTGTCTTGATTAATGGGGGAGCCTGATCTTTTTTCCAAGTGATTGTGTTTTTATTAGCTGGCTCTTGTTAGGAGCTTTATTGATGACTGCTTAGATTTCCTTAAGATANATTTTGATGCTGCGGAAACGGAAAGCGTGCTTTGTTTGAGCGCGCTCAGTTCTGCTCAATTATTATTATTATTATNNNCTTCTGTGAGTCCCGTTTGGTAATGACGATTGAGAGAACGATGNCTATAATATAGGACTTGCTTGC…
GmaAffx.90963.1.S1_x_at	CF806688	At4g13940	1e-109	Metabolism			GCCTCATGGCCTGTCGGACCGAGTTCGGCCCCTCCCAGCCCTTCAAGGGGGCCCGCATCACCGGCTCCCTCCACATGACCATCCAGACCGCCGTTCTCATTGAGACCCTCACCGCCCTTGGCGCCGAGGTCCGCTGGTGCTCCTGCAACATCTTCTCCACCCAGGACCACGCCGCCGCCGCTATTGCCCGCGACAGTGCCGCCGTCTTCGCCTGGAAGGGTGAGACCCTCCAGGAGTACTGGTGGTGCACCGAGCGCGCCCTCGACTGGGGCCCCGGCGGTGGACCCGACCTCATCGTCGACGACGGTGGTGACGCTACCCTTCTCATCCACGAAGGCGTCAAGGCCGAGGAGCTCTATGAGAAGACCGGCGAACTCCCCGACCCCAACTCCACCGACA…
GmaAffx.2742.1.S1_at	AW349694	At1g77670	3e-15	Metabolism			GAATTGGATGCCCTACACTCTTTAGTCACTACCTACTACTACTACTTAGCTGCCATGATATTTGTACTTCCCTGGAATGGATCATCTTCTGAAGGGTATATACAATGACCAGAAATCATGTCTACCAGCTAGTAAGTGATGCCATTCAGATTTGATTTAACTTTTACATTTATGGGTTGTATTTCAATGAACCATGATCATTATCTTGCTGTCTTATCCCCTTATTGTTAAACCTCTTCTTCCTTTCGTTTGGATGCAAAGAATCAATCATGAAGCGGGACATGACCTCTTTCTTAATTATTTCCTCTAAGATTTGGAATGTTATGAATCTCTAGGCGGGTA
Gma.14855.1.S1_at	BU550191	At4g33680	0	Metabolism			GACATTTGATTCTCTTGGGTTTAAAGTCTATGGAGGGAAAGATGCACCATATGTGTGGGTCCATTTTCCCGGCCGAAGCTCATGGGATGTATTCGCTGAGATTCTTGAGAAGACTCATGTGGTTACAACCCCTGGTAGTGGTTTTGGACCTGGTGGTGAAGGTTTTATCAGGGTTAGTGCCTTTGGTCACAGGGAAAATGTCTTGGAGGCATGCAGAAGGTTCAAGCAGCTATACAAGTGAANTTAGAATNNNNATCTCATTTGGTTTCAAGAGTTGTNNTCTCTTGGACTGAAGCTAGGGNCTGTCTTATTTAAATAATGCANTTGATTTTCCNTGGANTTTAGATTANANNATGTAAAGACAGNGTTTATCAATTGAGGANNNGTTNANNTNNNNAN…
Gma.14855.1.S1_s_at	BU550191	At4g33680	0	Metabolism			CGGCCGAAGCTCATGGGATGTATTCGCTGAGATTCTTGAGAAGACTCATGTGGTTACAACCCCTGGTAGTGGTTTTGGACCTGGTGGTGAAGGTTTTATCAGGGTTAGTGCCTTTGGTCACAGGGAAAATGTCTTGGAGGCATGCAGAAGGTTCAAGCAGCTATACAAGTG
Gma.15775.1.S1_at	BU765934	At2g37790	1e-122	Metabolism			AATATGCTTCATAGAGATGTTGACAAATGCACTGCTCCTCAAGCAGATTGATTCCGCCTTTTACCTGTTAAGATCTTAAAGCTACCAGCTGTAGTGATTCAAGTATGTTTGAGATTTTGAGAAGAGCTATTGTTCATAATAACACAAAGTAACCGAGACTTATTTTTCATTTATAATTGTTGTATCTTTAATTCAATCTAAAGAAACCAGTGCAGTGAATTTTAAAGGTCTGGTAGCCAA
GmaAffx.90376.1.A1_at	CF806101	At1g55740	4e-52	Metabolism			ATGCAGCCTTTGCATCGTTCCCATACAGTATGAATTGGTTGCTCTTGGTTTCATTATGCCTCATTTTTAAGAAGTTCATTGTAGTTTCGTTAAGCTAGAAAAGAAATATACGGATAGAAATGCATTAAGATTAGCCCGCATATCCTTTAAATGGA
Gma.6281.1.S1_at	BE658173	At5g42650	6e-87	Metabolism	Cytochrome P450	CYP74A	AGAACGCCGAGGACTTTGTGGCCCACAGGTTCCTTGGCCACGACGGGGAAAAGCTCTTGAGACACGTCTTGTGGTCCAACGGACCCCAGACGGAGGAGCCCACACCGGATGATAAACAGTGTCCCGCCAAGAATCTGGTGGTGCTCATGTGCAGGCTCTACTTGGTGGAATTCTTCCTGCGTTACGACACGTTTACGTTCGATTTTAAACCAGTTGTTCTGGGTCCCGATGTTACCATCAAGTCACTCGCCAAGGCTTCTTCCTTCTGATCCTCCTCATCACCTACTCTACCTCAAACTTAAAATCAATCTTCTTTTTAATGTGTATTAGTTAATTAATAATTAAATAAAACAAAGTAAATATATATATTAAAAGTAGGATGTGCACTGGACAGCACAG…
GmaAffx.50033.1.S1_at	BU550874	At3g57610	8e-60	Metabolism	Purine Base Biosynthesis		GTTTCTCATCGTTGAATCTTACCAAGCTNGATGTTTTATCAGATCTTGAAGAAATACAGTTNGGTGTCTNTTACAAACTTGCTGATGGCACCCCAATCAAATCATTCCCTTCAGATCTNCGTCTTCTTGAGCAACTGAAGGTGGAATATGAAGTACTTCCTGGATGGAAATNTGATATNTCTTCCATAAGAAACTATTCTGACCTTCCAAANGCTGCNAGGCTGTATGTGGAAAGGATAGAAGAACTTGTGGGGGTCCCTATTCACTACATTGGTATTGGGCCAGGACGTGATGCTCTCATATACAAATGAGTTCACATTGGATTTGCATGCCTCTGTAGGTAAGTTGAGGCTTTTTGCGGTAGAGGTGTCGATTCCCGCTAAGTTTCAGTTTTTTTGG…
Gma.2354.2.S1_at	CA819143	At1g74040	0	Metabolism			GTTGTTTCCAGTGTCAAGGCCTATATTGCTGCACTAAACAAGATGTNGGGTTTCAAGGAANCNTCTCNATCTGCTGAAAAAATTNCANTTTCTTCATTGAAGATTTGAGAATTNTGTGNTGCTNCTTTGGTAACANTTGTTTGTGTTNAACCACNAAGAGGAAGACAANGTTGCAGCAGCATTCTTGGCTCTCGCAGGTCTCCATATTTAAGGTGTCGTCCCTGTGTTTTGACCGGAATGTATTTGCAGTCAGGAATTTATTGATTCACCCAAGTAGCCTTAGCAAAGAATGTAACGTAAGTCCATTTTGAATATTCAGACTACAGGGATTCTTTCCCTTTTNATTTTATAGGGTGCCCTTTATTTGAAATTATNAAATGTCCTTNAAGATTAGAGTGT…
Gma.5093.1.S1_at	AF244518.1	At1g74960	0	Metabolism	Fatty Acid Biosynthesis		GGGTCACAATTCTTCAATCATATTTNGCACCATACTAGTGAAACAGATTTCAGAGCAGTACTTTCTTATTATTATAAGTTACTGAGTACCCAGACAATGTTTATTGCATACTAACTCCAGTGTTTTGGTTGGTTGAGAATATATGCGGTGTGGATTAGTTGGTTGGATCAGTAACTGTTGAGAAACATTGTTTTTTGGGATGGGGTTGGTTGTGTGCCTACNGAATCAGAGTGTTGATAGATTATCATTATCTGGTGCTCCTGGTGGGAGAGAGTGAGTCGCTATCTATCCACTACCATNAAATCCTATCTTTACCATGAATGGNCTAGAGTAGGNAGTTGACCCACTTTTGATGTAACCGTTTAACAACCATTTTGATGGGATGGATACAGTCTTTTG…
Gma.8351.2.S1_s_at	BM886530	At5g19440	1e-93	Metabolism			CGGTTACATTGCTTCCTGGATAGTCAAATTCCTCCTCAATCGCGGCTACACCGTTAAGGCCACCGTTCGCGACACAAGTGATCCGAAAAAAATAAACCACTTGGTTGGCCTCGACGGTGCTAAGGAGAGGCTGCACCTCTACAAGGCGAATCTTCTNGAAGAAGGTTCCTTTAACTCTGTCGTTCAAGGTTGCCATGCTGTGTTTCACACTGCTTCTCCCTTTTATCACAATGTCAA
Gma.4358.1.S1_at	BM308967	At5g57890	8e-68	Metabolism	Amino Acid Biosynthesis/Metabolism	Tryptophan Biosynthesis	AGGGAAGATTGTTCGTGCTCCTCATGGTGTCATGCATGGAAAAAGCTCAATGGTTTACTATGATGAGAAAGGAGAAGATGGAGTACTTGCTGGACTATCAAATCCTTTCTTGGCTGGTAGATATCACAGCCTTGTAATTGAGAAAGGTAGCTTTCCTGATGATGAACTTGAGGTTACAGCCTGGACAGAAGATGGTCTTATAATGGCTGCTCGTCATAAGAAATATAAGCATCTACAGGGAGTTCAGTTTCATCCCGAGAGCATTATAACCCCTGAAGGCAAGACAATTGTCCATAATTTTGTCAAGCTTATTGAGAGAAGTGAGGCTGTTGGTTCTTGAAACAATGTTTGCTGTGTATAGTTAAAATTGTGGTTTGACACAACAAACTAAAATAAAGA…
Gma.13056.2.S1_at	CA819511	At3g55870	7e-26	Metabolism			CAAACGCAGAGAATGGGTTGCCCATCTCCAGGCTGGAGCGGGAATTGTGGCTGACAGTGATCCTGCTGATGAACAAAGAGAGTGCGAGAACAAAGCTGCAGCTCTTGCTCGTGCCATTGATCTTGCAGAATCTTCATTTGTTGATAAATAATTTGGATTGATCCATCATCAGTGATGCTCCTTGATAACTGAGGTGTGCATCCTTTTTAAATGGTAGAGAGGAAGTTTGTGGTGTGGGCAGATGATAGGGGATATGAATTACGGAGAATCTGAAACTNTGATAATGTTATGACAGAAGTGATGANNATANTAAGGTATTTAATGATAATGACAGCTTTGTGACTTTAGTTAA
Gma.6589.1.S1_at	BQ628423	At4g24830	2e-34	Metabolism	Amino Acid Biosynthesis/Metabolism		CAGTCGTACGAGTCCCTTTAGCTTGTATAGGGAAGACATTTCTTCATTTGAAAGTGGGCAGATATATGATCAAGCTGATGCTGCTGGGTTCATTCGGCTTTATGGTCTTCCAGTGAGGGTTCGAGCAATGCTTGAGCAGGGCATCTAAGATTTCATTTCTCAACATGTACTTGATATAATAGACCATTTTCTTGTTTAGAAAATGTGGATTGAAGCTAGTGGGCACCATGTATTGTTATTAGATCCCTCGAATCC
GmaAffx.93265.1.S1_s_at	CF808990	At5g11520	2e-92	Metabolism	Amino Acid Biosynthesis/Metabolism		TGATTCCGTCTTCAATCACCTCGTTCGTGCTCCCGAAGATCCTATCCTCGGGGTAACTGTCGCTTATAACAAAGATCCAAGTCCAGTTAAGCTCAACTTGGGAGTTGGTGCTTACCGAACTGAGGAAGGAAAACCTCTTGTTTTGAATGTAGTGAGGCGAGTTGAACAGCAACTCATAAATGACGTGTCACGCAACAAGGAATATATTCCGATCGTTGGGCTTGCTGATTTTAATAAATTGAGTGCTAAGCTTATTTTTGGGGCTGACAGCCCTGCTATTCAAGACAACAGGGTTACCACTGTTCAATGCTTGTCTGGAACTGGTTCTTTAAGAGTTGGGGGTGAATTTTTGGCTAAACACTATCACCAACGGACTATATACTTGCCAACACCAACTTG…
Gma.197.1.S1_at	U55874.1	At3g47340	0	Metabolism	Amino Acid Biosynthesis/Metabolism		CCCTCAGAACTCAGCCAGGCTGAGTGTTCCTGGAGGACCAAGTGTTGCATGTAGCACAGCCAAAGCTGTNGAGTGGGATGCTGCTTGGTCTAACAACCTTGATCCATCTGGTAGNGCAGCACTTGGAGTGCATGCATCAGCTTATGGAAATCAGGTCAAAGCTGTAGAACCAGAGAAGATCATACCAAAGATGGAAGTTTCCCCACTAGGAGTTGCCATATAGAGCTAGTATGAGCCATAGCAAAAACTAGTAGTTGCCCTAGAACCAAAATATATTATTATACTAGTCATCAATNACTCATTAATCATCATAAATGAAAATTTGGCCTGCTGTGTAGTTTATTCAGGCAAGGCTATATATAAATA
Gma.11265.2.S1_at	AW756751	At5g18670	1e-167	Metabolism			CATGAGGTTCAGGTTTCAGGTCAAAATTCGTCTGAATCTGGTGTTCCAGGGGGGTTTGAACAAATTAAGAAGAATTTATCTGGAGATAATGTATTGGACTTGTTCACATATCATAGAATGGGAGCATCATTCTTCTCTCCAGAGCATTTTCCTTTGTTCACTGAGTTTNNNNGGAGCCTTAAGCAACCGGAACTGCATTCAGATGATCTACCTGCTGAGGAGGAAGTAGGTGCTGAATCCGCCGTGGTTATGAGCCGTGATTCAACTGTGAGCATGCAAGCAGCCTAATGGTTGTAAATTTGTAATCTATGATAATCATGTATATAACAATTAGTTATTATTATACTACCCTTGCATCAGTGCATGGGATGAGATTGAGGACAGGTTATTTTGTAAGCA…
Gma.1.1.S1_at	U36442.1		0	No Homology to Known Proteins			TTCCTAACAGCATCTCCATCTAAAGAGGTTTATGGTTGTGTTGCAATTTAAATAAAAGATGAGGTGTAATTCCTTCATTCCCGTGTATAGTTATTATGTATGTTTGGATGCTTTGATGTTTTGCTTTAATAAATTTTCTCTGTTTCTACTTTGTACCATGCTAGATTTACAATATGA
Gma.1013.1.S1_at	BE660057		0	No Homology to Known Proteins			TGTTACTTCCCTATCCTCGTGTGTGGTTCGTACTATGAAGAGGACTATGCCATGGAGTGANGACGATGAGTCATCGTCTTCACATTCAGATTCTGAANGTGATAGTGAAACTGGAGGGGNAAANTCCAAAGGTAAATCTAGNAAGCAGANAACTNAGAAAAGTGGTNTAATTGACTTTGANGCTNTGAAGCGACACGGNTATAGAGGTGGACCTTCNGTCCTAAAAGTACCCGCACCNAAAGANGATGACTCNAAGNAANATTGGTCGTGGTCCACTGGAAAAGAAAAGCNTGTAGACAAGGAAATTGAAGAATCATATGAAGANCGAAAGAAAACAAGAGAGGCTATTTCCCTAGGAGAGGAGCTGCCA
Gma.10181.1.A1_at	AW309620		0	No Homology to Known Proteins			GAAACAGTCAGAATCGATAAGATTAGAGAGTCATGGCTTTTGNAACTACAAAATATACTACATTAGTTTGTAAAATGNCCCACAAAAGAAATAGGTTGCTTGTACTTAGGTTCTGTATCTTTAGATTATCATNTAGCATTCATCTTATATTCTTTCACTGTAAGAGAGAGTTGTTGTGTTTTTACCCCGTCGAACTAGAATTTCTGGAAGTCCCCATTATTTGGCCA
Gma.10222.1.A1_at	AW830057		0	No Homology to Known Proteins			TTAATGTAGGGTCTTTTTCGTCACTAGAACTGATTTCACTGATGTCTTGTCAAACTCTTTTGAAAGACTGGAGTATATAAATCATAGCAGATCTCACTAAAGAGAATATTGTTCATTGCAGATAGTAAATAGAATCAGTAAATAGAATCTTGCTCTGCAAGAGATGTTTCTGCTGGTTTTGCCGTTGTCTTGGTGAAAACTGAAGCATATGGGGAAGGGGGAATTTCCTGGGGTGTCATGAACCAGTTGAAAGTTATTTTCGCTTTCGTGTCCACCCGAGTTCCAAAGTGTATATGCATCAATTTGACATTCTGATTCCAAAGTGCAGCAAATAT
Gma.10328.2.S1_at	CD412052		0	No Homology to Known Proteins			ACTCCTTACTCATGCCTCATAAAGTCTGTCTTCACAAAGATAATTTGCTATTCTGAGTTCGTTTGCCCTTGTGTGGCATAGTCTATNATAGTCAAATTAGTGTACTTGAATTTGAGTCAAGTCTCCAACTGATAATGGAACTTAATTTTGGATTTAGACTCTACACAGTTTTAACGCTTGAAACCCTGAAACGTTCAATAGTGCTGTTATTTCTTGAGCCTGGAATTTTGTCAAATTTCAAAATGACATATATTGAACTTTGCTACTTGTGATGTTACCGTGACAAGATCACTTTTTAATTGAA
Gma.10348.1.S1_at	CD414081		0	No Homology to Known Proteins			ATGTCGGGTGAATCCATGACTTGCTATTATATTATGTTCAATCCCGGGATGGAGATGATTCAGATGGTCGATTGTAGATGCTTCTTTCAGGTGTCTCTCTAAAATTCAAATATTCCGGAGTCCAAAGCTGTGAGATTTGGGAGTTGCTACTGGCCCCACTCCTATTGCTATTGGTCCCTACCAAGGGCCTGACCCCTTCTTTTATTCCCNAAATGTCCTTCCCACGAAATCATGATTCCATTGTAGGTATTGCAAAGCGGAATCATGATTTGTTGNATAACATTATTCCTTCTTCCGTTAACGCAATGGAATCATGCAAAGCGGAACCATGCTTGCAGCTTCATTTTTATTGTTAAATTTGAANNGAGAGGAATCTTGATAAAAGTTGTCACTCGTGGT…
Gma.11082.1.S1_at	BQ612677		0	No Homology to Known Proteins			TTATTTATCTACTTGCTAATCCTGTATTCAGCTTTGGAATAGAGTTGCAAAAAAATGATTTTAATAAAATTAAGAGAGAAGCTATGTTAAAAAAGCATACTTTTCATGGATAAAATATGGAAATTAATTTTGAACCGTAGATCTAATTGGCCTTAATATAA
Gma.1136.1.A1_at	BF595987		0	No Homology to Known Proteins			ATTCATGGCATGGTGTTTATTTAAAGATATGTCAAATGCAGCTTGTGTAATATTTCGTCATCATCTTGGTGATATGAACAGGTCACTCTTGAAGGGTAGTTCATGGTTGCCATGGTCTTTGTAGGACCCTTGAAGAACTTAATGCTCCTCAAAAGTTGTATTTTCTGTTGAAATTGAAAGGGATAGTCTATGACTATGATATTAACTATCTTAGTGCATAATATCTTATGGTTTTAGGTTGGTTGTATTTTCTGTTGAA
Gma.11430.1.S1_at	BE659510		0	No Homology to Known Proteins			TTCGCTATGGCACCAACATTCAAGGCCTTCGCTCTTTTCCTCCTCCTCGCTCTCTTCTCCGCCGCCTCCGCTCAAGAATTATCCCCCGCCTCGTCTCCGGCACCGTCGCCTGAAGCAGGAGCCGCAGACTCCGTGCCTTGCTCCGCCANCATGATCGGTGCCTCGCTCGTTTTGTCTCTCATGGCGGTCTTCAAGTTCTAGGATTTCTTATTTTGCATTTCATGAATGAATTAATATTCCAAAATAACATATATAATAAACTTGAGANTTTCCACGTTACCACTTCAGAGTTTATTTTATTATTTGTTGTAGGTCTTATGGTGAAATAACAGGGATTTTATCCTCTCTACATTTTT
Gma.11768.1.S1_at	BG508925		0	No Homology to Known Proteins			GACTGTGCAACTTATATACTATGAACATGGCAAGCTGTACCCAATTTATGCTATTACTGAGCATTTCCTCCCTCGTTTTTTTTTGTTGTATCATGGATGCACAATCATCAATAGAGAGTAGCTTTAACAGNAANNTATTAGACGTGGTTTACTATAGGCAGTCATAT
Gma.11871.1.S1_at	CD409660		0	No Homology to Known Proteins			TGCTTCTTTGGTGGTTTATGGAGACTATTTAATGTGAAAGATTTTGAAAAGATGTCTGGCCAACTTTTTCTACTTGGCTATCTGGCGGCGCTCAGTTATCCCATTTTTGAGGGGATAATAACCATGAAAAGCAAGGTGCAATAGTAGTTTGTCAATGATTAGGCTAATTTAGGTATTTGAACTTTGTTCACAAATAATTTGCTTCATATGAAAATCTAAAGTGCATGCTAAATGTTTGTATCTTAATATGTAATTAGCGTGCTTTTATTTCATGCATGAGAATATGGCTATCGATTTTAATTAGGAGCAAAATGTATGTTCTTACTCCATTTTTAATG
Gma.1189.2.S1_at	BQ453094		0	No Homology to Known Proteins			ATTAGCATAATTTTTCCCCTCAAATTACCGTTTGTTTCATCTCGTTTGTCAGGGGCTTCGTGGTATAATATACACAATAATGAGATATACTATCAGGTCCAGTTAATTACTGGAATCTTTGAAAGAATGATAGCATGCTCTCTGTATTGAAGATTGC
Gma.12149.2.S1_at	AW156471		0	No Homology to Known Proteins			GCTGCCTATGGTGCTCACCACATGGCACATGGATATCATCGTTTTGGACACGGAGCCTACCATGNNNANGGAAAGTTCAAGCACGGGAAATTCGGCAAGCGTTGGAAGCATGGCAGGTTTGGATTTGGCAAGTATAAGCATGGTTGGAAAAAGTGGAAGTGATAAAGAGACTAATATGTTAAAAATGTGATTTTGAGCAAGGTCATGGAGCTTTAGGTATAGGGTGAATAATGTAAGCCTACAACAACANTATTGCATGTTTGGCTTCTGTATTTAAAAGAATGGAATATTTCGGTGGAATGTGTGTGGCTTCTCTATTTTAAAGAATGGATTGTTACTATTTTTTCCCTTCAAAGGGATTAAAGTTGAGACAGCAGTAATGTATCAGTTGTAAGTTTT…
Gma.12314.1.S1_at	CA819508		0	No Homology to Known Proteins			GTGCAAAATTTGTGTGATGTTGTCTATGTTAAAACTAATCTTGCGCTGTGTTTGCTATTTCAAGCGTGTTTTATTCTTCAGACCAATGGACGTGTTTTTCACTTT
Gma.12519.1.A1_at	CD395828		0	No Homology to Known Proteins			CACCTTATGCCAATGCAGATTAAAATCAGAATGTGAACGGAGCAAGTGCTGAATAGTTGTTAGGATGTTCTCTCTGCTATAGTGTAGTTCCTCTAGGATTGGTTGAGCATACCACAGACATGTTAGTTATGTTGATGTCATGACAATGGGTATTGTTAAGAACTTGGCTTTTGATGGAACTACATAGGGTTGTAGCTGGCAAAAGGGTGCGTTGGACACTGTTTTGCATTGGCTGTCTCTCTTCAGCTTACTGAAACCTGAAGGTTGCTTCAGTCTTCCCTACTTTATATAGCATG
Gma.12624.1.S1_at	CD400674		0	No Homology to Known Proteins			GCTTGTTCAGGACAATCAATTCATTGANATGGTCTATAGAGCNCTGCTGAATGCTCATCAATCATGACTTNCACGAGGTGTTTAATTATCATCTCGCTGGATGAATTGTTTTTTGGGCTGAATTACNTTTGCTATNCTTTTTAGGCCAGGCTATATNNTATGTCCTAAACTTTGAAATGTTTCAGTCNTATTNAATTTGTAAAATTGGTTGTGCNNNNNNNNNANNANTTTGATCTAGCTAGTTTCCTATGTCACTGTTTTTAGACAAGTCATCGCAATTTAACTGCCATATTAACTGTATTAGTTAGGTGACATGGCAGGAAATGGTGAGGTCCAGATGAATGGTTGTTAGCAATTCGGAACTGATTTTACAAATTATGTTGATCGACTGAAACAAAT…
Gma.12754.1.A1_at	CD396689		0	No Homology to Known Proteins			TTGGTAAATCCCTCACCCTATGATGGCGTCGCCTGACATGTTTCTCCATGGAAATCAAGGCTTGTTTGCTTGGTAGTATTTCAATAGGCTAGGTTTATTGTTGATGTTCCTTCGAGATGTATTTTTTTTCTATATAAAAAGAATTGAGATTTGTTTTGAAAGATGAAAATTGAAGGGAGAAGAAGATAAGTGTAGGTCTGCCGGATGACTGGAGAAAGGGTTTTAATGTTTGATTTATGTATTTTTTTATGTATTTTGACCGTTTTTAATGG
Gma.12814.1.A1_at	CD391345		0	No Homology to Known Proteins			CCTGTGTCAGCTATGGTGATTAATCAATTACTTGACGTGTCCCTTGTATGGCACATCCTTTTTATTTATCGTATTTCTTGTCCTTCATTTTACATTTTTTTTTTCATATTTGGCTTGAAGAAAGTATATAACTGATGTGTGTACATTAAATTAGGAGACTTGTAATTTTGTATTTTCATGATCAGTTAGAAACATGGATGATCTTCGCATCTTCCCAATGCCATGTCTTTTTTAATGGTTGAAACATGAGAATGGTCTACTACTATCCTCTGCAATTCAGGCATGACTTTAAATTGTATCGCAGTA
Gma.12928.1.A1_at	CD396216		0	No Homology to Known Proteins			GAAATGCCTCATATTACACGTTAAATGTAACCAAACATCTGAAACTATAATCTCCATACAATGATCCCTATCCTTTTAGACCTTGTAGTCAGTGTTCATGTTTTCAGCTCTCTTACATCTTGGTTGCCAGATGTTACTTCTGATACGTTATGATGGCAGCGTAAACTCTTGATCGGTGACTTGTGGTGAAGGCTAGTGATCTGTGAATGAATTATATGGCCATACGATTGCTATAACCCATC
Gma.13298.1.S1_at	CD395877		0	No Homology to Known Proteins			TATTTACCACCTTTACACTTCTCCATCCAACCTTCTTCCTCCTATTTTCCTTTNNTTTTAAATTCTGCATTTTCTTTCACAATTTTCCCACCCCCCAACAGAATCAGNACCCGAATTTCCCAGATCCNAGACACCCAGTAGGAAAGATTAAAACTTTGGCGTCTTCATCGATCGCCGGTGNACGATGTGCTGCGGGGGGAGAGTTTGCATGCTTTGCACGTGTTTGGTTCTGGTGGTGATCGCCATCGGGTTGTTATTCGGGTTCGGAGTGTTCAAGCATGGATTCCACAAGATCAAAGACACTGTCAGTTTCTGCGATTCTTGCGGCGGCGGCGCCGCCGGCGGAGGAAGACCCTTCATCGGTTATGCACCGCCGCCATTGTTCTAGTTCACCATTCT…
Gma.13378.1.A1_at	CD395558		0	No Homology to Known Proteins			TAGATGCGTATGTAACTTTATATAGAGATGAACNACCCCATTGTTTTTTTTTTTTGGTTAGTTGTTGCCTCTTTACCAATCAGTCGGTCTTATTTTCATTCTTTTTGTAGTGGTAAACTTGGTTTTTTTTTAGCTGCCTTCCACCCTACATGCCCAAAGTGAGTAAAATCTGCTCCATAGTGCCACAATGTATGCCTTTCTCTTTTCTTTTTGTTAGGGGAGGACCATGTTTCTTCCGGCAAATGTAT
Gma.13719.1.A1_at	CD404344		0	No Homology to Known Proteins			GCAACATGAAAATCTAATAGCCGCAGAAAGGATTGTTCTGTTCTGATTTTTTACCGTTTAATAACGGTTAAGTGTGTTTTGATGAGGTAGAATGTGGCTTTTGGCTCATCACATTTCCAGTTTAAATAGAACATCACAGGTCTTACGAGTCTATTGTCATCATTCATCAAAATTATCCTTGTTAGTAGT
Gma.13905.1.A1_at	CD409462		0	No Homology to Known Proteins			GATGACAGAGATGGTCCTTGCTCCTCTATATNCATTTTATTTTCCGAAGAAAAAACGAGGTTGTTGTTGTGATTTTGAAAATGTTAATTTCATCTACATATGCAGCTCCGTACGTGAAACAATACTAAGTTGTGGACTTATATATATGGTTTCTTACTATAGATTTTAATTAAGCTTTTTTTTTTTTANACATGTGTCCTATTCTACAGCTTTTTGCATGTTATCCTCATTTTTGCTGATTTGTTCTTTCTAAACTTTTCTTGTTTGAGTTTGTTCTGTTCTGGCATTTAG
Gma.13915.1.A1_at	CD409949		0	No Homology to Known Proteins			ATTTGTCATTGGGATCTGTGCCTCCCAAAGCTGCNATTTTTACTCTCATTGNGTATGAAAGAAATCATGAGTTGATGTTGGAGGGGTCTTGTTGTAACTCTAATTGTTGTTGTTTTGTTGATTCGATCTATGATTTGTTAGATTGGAATCATGCTTAGGATAGAGATCACAGGAGATGAATACATTTGATCTTTTGTTGTGTAATTTTGTCTTCTGACCTGATGT
Gma.14016.1.A1_at	CD413373		0	No Homology to Known Proteins			GATGGGAATTTGTTACACTCTGAATCTGAACTTGGATGTGGCTAGTGATTGCAAGTTGTTTTAGTGTTTACATATGCTAGGTGAACTGTAAACAGGGAGAGGAAGATGCAACAATTTTCATCGTAAATTAGCTTGTTCTGATCTAGTCCAGTGACATTTGGTACGATGTTATAATTGGAACAAGGGAACAGTTAGAACTTGTAAATGTTAGCAAATTTTCCCTTGTCACATTTTTTTGCATGAGATTGTAATAATGGTATCGTACAGTGATTCAAAT
Gma.14036.1.A1_at	CD414107		0	No Homology to Known Proteins			AAACCAATTGGTTGAAGACGCCACTTTCTTAATGTGGACTTGGCTTCATAATTTGGAGAAGGATTTTACTATTCATTTCAATCAATGGTCCAGTAACTTCAAACATCATTTTTTGCAGTAGTAGGGGTGTTTTTGGGATCATATCACTTGTATTTTCTTCCCATATTTTGGTTCCTAATCAGACTTATGTTGCCTGATTGAGGAACCATATTTATGGTGTCTAACTCTGTATTTAGTACCTCTGG
Gma.14067.1.A1_at	CD414740		0	No Homology to Known Proteins			AGCCAGACAGAAGCCGCTGCTTCATTTTAAGAGGGTTCCATTCATCCTTGATTTAGTTTCATTACCTGGGGTTTATATTTTTATTTTTCCTTTTAACTTTGGTGTATAGAGAGGAGGGGCATAGAATTCTTGGATATGATGATAGTTTTGATATGGTGGTTATTATTGCTGGTGGTGGGGTATGTGTATAGTTCATACCTTTAGGTTCTCCCATGTATTTTGTTTTTGTCATTCATGTCTTATGGTTTACAATTGAATCCGTTGATTTTTGTATTTAGACCACACCTCAGTG
Gma.14127.1.A1_at	CD415773		0	No Homology to Known Proteins			AAGATGCCATCACCGATAACAAGGGTGCTGATCTCGAAGAACACATCACCGATAACAATCCTGTAGTTGTGACTCAGTGAACTGTGTTCCAGTTGTTCAATATGAACTCTTTCTTTCTAATGGATTTGTGCCTCACTTTTCACTACTTCTGGTTGATTACTATTTGCCTAGCATCCCTGCTTCGCTACATATACATACAATCAATATACAAAAGATGTGATCTGTTTCTGTGTCCAACACTCACCCACTCGGTAAAGACA
Gma.14129.1.A1_at	CD415788		0	No Homology to Known Proteins			GCTCCTCACATACCCTGTTGTGTATGTGGGATGGAGCAAATGTACTTTTAAGGCTTTTGTGCAGCAACATTACCATGCCTTGATCATGGCTGCTAACCTTAATGACAGAAGCTGCAATATTTTCCGTAGTCATCCGTAGATAATTTTGTAACGTCAATTGTTTAATTAGTGAGATAACTGATTTGTCGGCCNTTACTTACTATCGGAATTTTATATGGTTGTAACTATTCTTATTCGGG
Gma.14182.2.A1_at	CD417141		0	No Homology to Known Proteins			GGGCAGTAAAATGTCCTAGATTATGGTGGATTAACAACAAAACCATTTTTGTTAGACAGTAAGCTTTTAGGATATCCCTCATCTGTTGTTGAATATTTGATTTAGTTCCTCGAGTGTTGTCAGATGTCTTTTTCCCACGGAAGCATTCAGTTTATTAATCATCTACCTATTAAGTGTGTGTTGGGGTGAGTATTTGCAAACTGGATTTGGATAATCTTGATTTTGCA
Gma.14204.1.A1_at	CD417515		0	No Homology to Known Proteins			GTGACAATGTAATGTGACTCCTCTTGTAACACGCTTGCATGTTATTTTTAGTTGAATAAGTATAAGTACTAGGTAGCGTGTAATTGGGTATCCTAACATTGAGTTTAATCTTGATTTACATGCTCAGTTTTTAGTATCATCTA
Gma.14259.1.A1_at	CD418655		0	No Homology to Known Proteins			GGTGAACTTAGGCTAATCCTATACCGGTCAGAGCAATGTTCGACCGTTGATATCATTGTTTTTTTTTACCAAATGTCTACAGATATTGTCATTACTAAGAGGTAGTGTCTGGTTGTCACTAAGTGCCTGCTTAAAGACATGTGTAAATTGAGACGAATGAACAATCTTCCATGT
Gma.14554.1.S1_at	CD414006		0	No Homology to Known Proteins			GAGAATCTACCATCAACCATGTCTGATATTGCTATGTTGGTAGCAGAAGAATATGAGAGGAGGACAATGAATTTTAAGAAGGCTGGCGCTGTACAAGAGAGGAACTTGAACGTGGTTTCTTGTGCTTCTTTGTTGGTTCTGAAGGAGAAGATTGAGGTGCAGAAGAAGGAGCTTGTCAAGTGGGTTTTGGAACCCAAAACCCAATTTGCAATTGCTGCTTCTAACAGTTTCTTTTCTGCTTGAACAACTTCAGCTTGCTGGTTGCAATAGTTGGCTGTTGTTGGCACCTTGTTGTTTTATTATTTTTTCCTTTTGTAATCTATGTTTCTCTGTGTTACTGTGCATAGTTATGTTTTGAATTAAAGGCAAATGTGTTCCCCGTTTAACATCTCCGGTGCC…
Gma.1526.1.S1_s_at	BE822523		0	No Homology to Known Proteins			ACATGATGAAGCGTAGGTGGATGCGGGAAAAGAAAATTGTTTTGCATAGTTGTTGGGTTTAGAATTTCATAGGATGGTTCCCTACCCACATCCTTTTCTGATAATTAGTTTCTGAATTTTTATTTTGTCCTCCCTCAGTAGGTTTAGATTAGTGCACAATNGTAATTAGGGTTTAATATCATGATCCTGTACTTAAAGTCAAT
Gma.15454.1.A1_at	CD403826		0	No Homology to Known Proteins			GGATTTTTCATCCTGAACTCTTCTATTTATGTTATGCTTTTCCTCTCAATGTTCTTGGTTATTTTTTTTCCTCAACTTATACAATTTCTTTATGTTTTCTTCAATAATTTAGGATCCTGAAATTTGATGAATTTTTAATACCTTGAGCTTGGTTTTTGGCGCAGGTGAGTATTTCATATAATAGGGGGTGTCTATCTTANTTNNNTNTNNNCNNNCNNAGGATGCCCAATTCTAAACGATTGAAGGAATGAAAAAGTTCCAAGATAAACAAGATTTACCATTAGTGCAGCCAGCAACTGGAGAATTGGCCATCTGAATTCTTGGAACGGCATATTATCATTTTATACGTAAANGNTTTTGATGTAATTCTCGTGTAATATCTCTGCCATAACAGTTGTA…
Gma.15465.2.S1_at	AI522887		0	No Homology to Known Proteins			GATACTTTTTCATACTACTAGCAACACCTAACATGATTTTTTTATTTAGCTGTACAAGAAAGATGGGGTTGAAGATGATTTAGGAAGTAACCTGTGGCAAGGGGGTCCCTATTATTAAGATCACACTTGCCAAAGGANATGCTCCTTAAGGTAAANAGGAGGATAGTTTAGCATTTTAGTGCATCTTTTGTTGCATGGACAACAAGTTATGAACAGTGAGAACGTTGTGGATGGCTAGTTGCTTTCTCCAGCCAAACAACACAATCACAATATGAACCTATAGTTAGTCATACGCATATCTTTTCATTTACCTGTAAAGAGTATAGTATTCAAAAACAGTGGTAATGTAAGAGTTGTATGGTATGGTATAGGAACTATATGCATCATCAGCTACTCTAT…
Gma.15513.3.S1_at	AW598013		0	No Homology to Known Proteins			CCCTGCAATTGCCATTTGTAGTTATCTGTTAATTCTGTTTGCCTTTCGG
Gma.15513.3.S1_x_at	AW598013		0	No Homology to Known Proteins			GTAACAGTTTAGGATGTCCCTGCAATTGCCATTTGTAGTTATCTGTTAATTCTGTTTGCCTTTCGGGTCTTCAACCCATTTGTTTATTACAAT
Gma.15617.1.S1_at	CA852426		0	No Homology to Known Proteins			GAAAGCAAATGTTGCCCGCGGTCTTGTATTTTGGGTGACTGGCGGAGAATATTTTGATTTTGCCAGAGAAGNNNNNNNNNNNNNNNNGATGTAAATATGTGATTTTAGTGTGTAATTAATTTGTATAGTAAAAGGGTAGTCATGAAATGGATTGTGATTGCAATGATAGGCCCAATACGAGGCATGATCGTGGGATGAGTGCAATCCTTTATCGGGAATTCTTTTTCCATGTTGACATTGGGGCATTTCTTTTATTGAGCCCCTGAAAGAAAACAAGGAAATTCAGAAGGTCATTGCCTGTGATTTGTAC
Gma.15769.1.A1_s_at	BG045620		0	No Homology to Known Proteins			CAAAATGGAGTTGCACTTTTAGTTGATGGGAAATATTTGGGAGGCATGTTGGAGGTTCTAATTTTATTTTAAAAAATTTGTCAAGTGCATATGTTTTTTGCCCCCACCTATGTATGGTCCCAAATTTTGTAACTGCACGTGTAATCATATTCAAGTACTTCAGATGTTACCCTTCACAGGTTACCATTAAAATGCAAGGTTAAAGTGTACTGTGATCAAACTGGGTCGAGTATTTGCAGAAATA
Gma.15870.1.A1_at	CD417955		0	No Homology to Known Proteins			GGAGTGTCATCAGAACTTGCTTGCTACATTTGATGTGATTTAAATAATGGAATCAAATCACATAGTGGCATTTGCTTAGTTCTGTTGTTAGGTCACCAAAGTGGCATGCTACTTGCCATTGTCCAATGTTTTGGAAAAATGGATGTCGGTGTAAGTGTAATGTCCATTCTCTGCTCTCTTT
Gma.1603.1.S1_at	BI943666		0	No Homology to Known Proteins			TGAGACGCGTGTGGAGCCTTCGCTAGTCCCGCCGAAGATATTGGCCAATATCACAGTCATTCACATGGTTTCTCGACTAACAGAACGGGGCTTATGCCCTCGTGATCCACCT
Gma.16034.2.S1_at	BG041978		0	No Homology to Known Proteins			ATCAACGGTTCTGGATTAAAGTCTCCATCATGCTCTCTCCTTTCTTTGTATTGGTGGATGAAGTTGTCTCAAACTTAATTTTGTTCTCACTGGGGGATTNTGTTTCTCCGTTAAGAATATGGTCAACAGATTGTAACCTCGTAGTATATTTGGTGTTCACTGTTAAGGGAATCAGCGGAGCACAATTGATAGCGCTCTCCTCCTTATCACTTGAGCCAAAGACGAGAATTTTTTGCAACGTATTGTCATCTATATCTATATGTTACATAGTTTTTGCCAT
Gma.16611.3.A1_at	BF424501		0	No Homology to Known Proteins			AAAGATGAACCACACAAACTGAAAGCTCTCGAGAAAATGATGGAGAC
Gma.1670.1.A1_at	BI893962		0	No Homology to Known Proteins			TCAACCTCATTTAGGCTCTCACTCATGCTTGACTGACAGCTGACAATTAACTTACAAAGACAACTCTGATGGTCAGATGAGTGTCACACGATGGTTTTGACTCAACAGTTGCACTCTTTGGTTGGTACTAGGTGTTAGTTGGCAAATCTGTTTGTTAGGTTTTCCACGTGTCATTTCTCCAGATGTATCTGTAGTATTGTTTANTCATTGTTGTATCAATTAGATNANAGGATATATGTTGTGCCATTTTCTCCCTTATTTATATTCTATATGGATATGTATGTTATAAATGTGATTGTATGTGAGTGTTTCTGAACTGTAACCTTTACT
Gma.16792.1.A1_at	AW350500		0	No Homology to Known Proteins			GTTATGCTCTATTACTTGGTGTCTTTTATGCTTTAAGCATTTAGGATGCACACCTGTTATATTAGCTTTGTGTAATATTAATTGGAGGAATTTTAGGGATAAAGTATGCGGACTCGTAGCTTAATTTGGTTAGATGTTGTGTTCACTTGGGTGATTCAAGAGGTTCTGGCAGGATCGGGTTAGTATGTAGGATCTTGATGAGATGCCGGTGACTTTGTCATCCGTTAGTTGTAATTTATTGTCGGTCCATATGCCTAAACTTTCTCCTTGTTAC
Gma.16828.1.A1_x_at	AF047051.1		0	No Homology to Known Proteins			AGCAGTAACAACATTGTTTTGAGCTAATAACATAAGACGAACATAAACTACTTGAATCCAACAAAATGTATCAAACATCAAAAAGGAGAAACCAGTGCCACTAACAACTGGGTGTCCCATTCGACAACATAAGCAATTGTAAAAGCAACAGAAACAAACTAGGTTTAACGCACTACTTGGATCTCTGTC
Gma.17089.1.A1_at	AI938052		0	No Homology to Known Proteins			TTTGTCCCTTCAACTTTCACCTCATTTCAACTGCTTCTACATCTATTCTATTGTTCACGTGCGTCTCTGTGGCGTAGAATCTTGTTAAATTGCAACTCTTGTAAATC
Gma.17137.1.S1_at	BE022871		0	No Homology to Known Proteins			GTTCAACAAAATTGCCATGTTCTTTGCTTGTCATCATGTTTTTCCTTGCAACGACTTTGACTTTCACCTTCAAGACCATGACCTAGACAACGTCGTTGCACATTTTTTTAAACTTTGTTATTATCTTCTACTGCTTCGAGCATACTCACTTACTGGTATCATTTGTCCTTT
Gma.17283.1.A1_at	AW310940		0	No Homology to Known Proteins			TGGCTATCCCGCTTTATTTACTTGCAGCCAATGCAATCAAGTTTGCAGTTGTATTTAATAGTGGCCCAGCTAGCATTATCTGTCTAAGGATCAATAG
Gma.17343.1.A1_at	AW596532		0	No Homology to Known Proteins			TTTTGTTATTCCAGATTTGCTTAGATTTCTGTTGATGGTATGCATAATATATCCGCTACCCATTTTGTGAACACTTGAGTCTGAGGGAATCTTCATGACAAGGTACTGTTATTGAAACAAAACATGGTGGTTCTTAAAGCATGGTGATGGAATGCTGCTATTATGCCGAAGAGGATTCTACAANNNNANNTGGGATTTCGTTTTGTCAAATGATCTTTATGGATACAGCTTGTGGAGCGCTGATCTTTCAGTGGGCTTCCCAAGTGGGACTAATTATTACCATGGTTGTACANNGTTTCATTTTGTATAACTTTCATTGTTTTTTNAAACTGGATTAGACTGACTGGTTTGAG
Gma.17654.1.S1_at	BU765503		0	No Homology to Known Proteins			ATGTTAAATTATCACGCTTTATTTGTAATCTGCCATCTTTACGCAAACCGTGCCCCATGAATAATGTCTAAAAT
Gma.17844.1.S1_at	BM307334		0	No Homology to Known Proteins			GTATTTTGTCTAATCAAACCCTTTGAGGTTGCTATTGTAGGATTTCGATTTTAACCTCTGGTTGCTNAATGCATGTAAAGTGTCCTCTATTAAANANNNNANNNNNNAGTTAACTATATATACTGCTACCACATCCATGTTATTTACC
Gma.17876.1.A1_at	BE658981		0	No Homology to Known Proteins			GTGGTGTTATAATATCTTGTCGGAAGAGAGAGCAAAATTGTAAAATCCTCTCTCAGGTACTCTCTGTATCTTGTATTCATGTTGGAGAACTGTGAAATTTAACACTAACAATAGTACTGCAGAAAATTTAAATTTAAATCTTCGTTTTTTGTATGAGAAGATTTCCATGTGTCTGATTTTAGCACCTTGTGTGTGCTGTCCTTTTTGTCCATTCTAGCNNTNNNNTACCATNNNNNTGCTTTCCTGTTGTGGATTTTTAGCTGCCACTTCTCATTCCAAAGCTTTCCTAGACACATGATGTAGTGATCAGTTTGGCTAAAATTTAGGGTTATGCCGTAATGAATATTTTGTACCATTGTTTGGAAATTGAACATCTGCTCTCCTTGTCAATAGTCGATT…
Gma.17918.1.A1_at	AW309759		0	No Homology to Known Proteins			TAGTGAACCCAATTCAAAGAACTGAAAAAAGACGTGAATATGAGTAGTCAAATGGTGATTGACAGAGCAACATGCGATGGGACCATAGTATAGAAAATGGTTATGCCCACTTGTGCCGTTCTCTGGCTTCCGTTGGCATTGGTAGATCATAATGTTGAGGGAATAAGTAAATGTTAGGTTCAAGNNNNNNATGTGTTCATCTCCAATTCTTCATTCTTCTTGATCTTGCATCAAAATAGACAACCGTGGATGATACAAAAAAAAAGGTGTGACCAAGTTGATTTTTAAT
Gma.17932.1.A1_at	AW350252		0	No Homology to Known Proteins			GACAATGTTGCAGCAGCATCCTTGCCTCTCGCAGTTCTCCATATTAAGGGTTGTCCCTGTATTTTGACCGGAATATATTTGCAACCTGTAATTTATTGATTCACCCAAGTAGCCTTTGCAAAGAATGTAACTTAAGTCCGTTTTAAATATTCAGACTACAGGGATTCTTTCCCTTTTCATTTTCTTGGGTGCCCTTTATTTGAAATTATAAATTATAAATGTGCTTCATAATTGGAGTGTCCCTGTCCGTTCC
Gma.1805.1.S1_at	CD395511		0	No Homology to Known Proteins			AGAAGGTTGCGAATGCAGGCCACTGGGTTTCTTGCTCGGATTGCCCTTTGCTCTTTTGGCTTTGATTTTATCTCTTGTGGGTGCAGTTATCTGGGTGCTTGGATCTATATTGAGTTGCTTGTGCCCATGTTGCATTTGCTGCGCTGGATTGGCTAATTTGGCAGTGAGTCTTGTAAAGCTTCCAGTAAAAGTTCTTAGATGGTTCACTCGTCAAATTCCTTGCTAGAGCATAATCTTTCCCCTTTTTGATTCTTTTGTAGCAATACTTGGGTCCTTGTATTGCCTCTTTTTTTATCTTTGTTGGGATTTGCCTATTGTTTGATTCATTGGATTTGTTACGATCATCAAGCGTT
Gma.191.1.S1_at	BI945387		0	No Homology to Known Proteins			ACTCATTCACATGTTTTGGGGCGATTTTTTTTTTCGGTAGTCCTTTGGTAACCAAGGAAGTTTGTAGAAAAAACCATCGATGTCACTAGCTGTAAAATGTGAGTCAAGATGTACAGATAAGGGCAGATCCCATGCTACTCTGAAACATGAATGATCAATTCTGTCTTGTGAGTTTTTGTAG
Gma.2471.4.S1_s_at	CA801420		0	No Homology to Known Proteins			TAAATTGAATTCTGCATAAGGCTTTAAAGATTTGAT
Gma.2616.1.S1_at	BI317777		0	No Homology to Known Proteins			AATAATGTTTTGTTACACCATGTAGAATATTGCTGAACAGTGCAAATAAGTTTGTACTAATCTAATCACGAAATAACGTGGTTACATATTATTGGTGGAATAATAAGTTAAAGAACAAAATAAAGTTGAGCTGACGGGAAATCAAGGCAAGATCATTCGGATTGAGTTTCATCAATAAATTGCTGTACCATTTAGTAATTTCATTATATATAAATAGCGGTTGGAT
Gma.2763.3.S1_s_at	BQ743155		0	No Homology to Known Proteins			GATGCAGAATCAGAACCATGAGAGAAAGGTCCATTTGTCTTGGTTTATATTGCATGCTGGATTGTTAGTACATGGCACAGTATGTGACATCTTGCAGTGGATTTTGTTTCCTTCACTTTCTCCTTGCTAGTACCTGGCACACAGTATACAGAAGAGGGGTCTCAATTTTACCCCGCTTTGTTGTACAATAGGCTTTTTCACGAGCTCATATTTTC
Gma.284.1.S1_at	BI946253		0	No Homology to Known Proteins			TTGTATACCTTGTAGCATTTTTGGGTTTTGTGAGACCTGGAAGTGGAATTACAAGAGGGTTTTTAATTTGTGAAGAACTGGTCTTTCTGCTCAATAAAGGTCGTGGTATATTCTTAGCTTCATTTCTTGTTGGTTCGGNGATAATTTACTGAATTAGAATTTTAATTGGTTACATTGTTGGGTTTTTCTGTTTTGCTTCAATTTGAAGGATGAGGCATGCAACTAAATTGTGTCTTGTTCGTTTTGAGGGTCATGGTTTAGGCATCAAAT
Gma.304.1.A1_at	AI973719		0	No Homology to Known Proteins			AGGAGGGATTCTCAACAGACCATGCATCTTTGTTTGCCATCCTAGCCTGGATTAAGTTGTGCTCCCAGACCACAGGCAGCTATATAACTCTCGATNAGGTTTATGGGTTANCNCGTGAATTATCAATTATGTAAGAATGGTGAAGATTTTTTTGTATGTTTTTCACCATATATGTATCATAAGAGAGCGTGCCTTTTCAAAAAATCTAGACTTGTGTATCATAGCAACTAGTCGAACGAAGAGACGGAAAAGTATACGAGGGATGCAATTGCTTT
Gma.3329.3.S1_at	AI959788		0	No Homology to Known Proteins			CATGCTTCGTTTAGCTCTGTTGCTGGGCGAAGATAGNNNANNNGNNCNAAGAATTGGAGTTGTAGAAAATTTCTATATTTTCCTGCTTCATATCNTGCNTTTTTGAATTAATACAGCTTTGTATTGTTGTGACTAGGGATATATAAAGTTTTATAATTCAACCATGCAATATTAGGTCATGGTTATCAAACCCCCACTGGTGTGCTTGGTTTTTTTTCTGGCTCCGTCTGCCAAAAAGTAGTATGCCCNTTGTTTAAGTACTTTAAGATGTGAAGAATTTGAAAGTATATGTTGTTTTNTTCATGGTTTGATAACAAACAGGAAGCTTCTTTT
Gma.3355.1.S1_at	AW101624		0	No Homology to Known Proteins			GTAATGTTGGTCATGCAACTTTGGGGATCAATCTATTTGTATAAGGANNNNNNNNNNGTTATGAACGAGTTTTGAGTCTCTGTGCATATCTTATACGTTGTAGCTTTTTCCTTCAGGTTTCAACACCATTTTGTTGTATTGCATTATCTTGGAACCGAGAAGAGCATGGCTTGTAAATACGCACCTCACTATTTGTCAATTTTTGTCTGCTTGTGGATACATTCAA
Gma.3530.1.A1_at	BU545704		0	No Homology to Known Proteins			AGATCATATTAATCCTGAAGGTCTTGGTAATATTATTAATNNGNNNNNNNCNNNNNNNNCNTTNTNNTNNNTTNNNNGATGAATTTTATGTCAACTCTAGATGACCTGGTGAGAAGACCATGTGCAGACCCTTTATTTTGAACTTCAATTCAGGTGAAGTTTTTCATTCTTTTAGCATATTTTTTAGTTCTAGAATAGCTTCATAAGTAACTCTGATGTATTACGTAGGTGGTTCTTTCTGGTTGTATATTTTTCAAAACTAACATTGGCATCTCGGGAGTTTTTCCTGGAATGTGTTTCCCGGAATTCTCCATGATGTATTTGTGGGGTCCGTCGCGATTGATGTAGCTGTATGCTTTTAAGTTTTAAGCATTCTGGTCTAGTGGTTTTTCGTGCAGG…
Gma.375.1.A1_at	AW350435		0	No Homology to Known Proteins			GGCAAAGCATTTCAAATTCTGCATTCNNGNTCATGGGAGAGNACTNGGGGAATAGCAACGGGAGAGGGTGTGCTGAGAATGATGCAGATGATAAGAANNNNTGNAGNTATCGTATCAGGCCATCCAATGTTGTATCACCATTATTAAAATTTATGTCCTCTTTTTTATTCGTTTTATCATGAAGACCNACCATATTGAGGAANGNAGAGATTGCTGAAGCTGCTTTGAGGATTTGTTAATAAGCATTATTTGTCTCCTTGGTCAAATAGATGATGATGGTTTACCGTACCAGTAGAAAAGGGAAAGCATTCGCTTTTTTAAGGACTTAGTCTGTGTATGCTGACTCGGATGATAGTTAGTTTAAGCTGTAGGTGGTGAGAATCCTATCACCAGACTGAT…
Gma.383.1.A1_at	AW350318		0	No Homology to Known Proteins			TGGGTGACCCGAATAAGTACGTATTGGGTTGTTGTCGGTGAATATTCCAAGATATAATGATTTGGTTATAGTGAAGGAGCCCAAGTGTGATTTTAATTTTATGTGATAGTATTCTGTCATGTGAACTGTGATGTAATGTAATATATTTAGGGCAAGTTGAAATGGACAAAAAGTTATGAGGGTGCTCCTGGTTGCATGTGCATACAAGTGAGCATAGGTCAAGAAAGTTCTGAATATGCTTTGTGTTGCATGTGGGTTTCAGAGCTGCAT
Gma.4497.1.A1_at	BE657853		0	No Homology to Known Proteins			ATCACCATCATTACTCTCACCATTATCCACGAAGAAGGCTAGATTGTGATCAGAGATTGAGTAGTAGTAGTGTGCTATGTCTCCAATTTTGCCTACACTAGTGTTCAAATCAAAGCATGTAGTGTATTTTGCATTTGTTTACCAATCTACACCTTACCTTAGGAACGAGAAAGCTAATGTCAGAGTCACTNNNTTTTTGGCATCTTGTTTGTCTACTGATCTTGCTTATGTACAGAGGAAATTTATCAAAANTNNTAAAATAGGGCGTTATTTTGACCAACATTT
Gma.4815.1.A1_s_at	BI969222		0	No Homology to Known Proteins			ACCATTTGCCATTCCCTGTTAGTAATCTTGGTGTCTACTGTCACTNTAATGTGTCATTGTCACTCTTATTTATTTAAATTTCAGAAAAATTCTCTANCAAAATAGATTGTTGTAGACAAAAAGTTATTTACATGTGGGTGNCANCAGGCATGCAAGAGTTGCAATAGNCATTCCTTTAATGGACTGGTAAATCAATTCACTCCATAGGTTGTTCACTGAGAAC
Gma.499.1.S1_at	BM521834		0	No Homology to Known Proteins			TTCGTGATCTCTGAATTTCAATTTCAAAATTCATTTTACAAATTACTACAAATTTGTTTTGTTCCTCCTAGTCCTAGCTAGTAGCAAAATATAGGTTGTTCAAAAATTATCCATTCGTGTATTGAATTTTGGCTATTCTTTGGTCTATTGCCCAGGGAATCCTCTATCATTCTGCTTGT
Gma.5163.1.A1_at	BE822452		0	No Homology to Known Proteins			GGAGGAGCCATTGTTGCAGTAAGTCCAGAAGTTTTAGTCTGGCTTCGTTCGTTGTTTCCTTATATGAAGCAGTTCCTTACTATGGGAGTGGTTTTATGAGGAAACATTATTCCATTGGAAGAGTTGACCGTCAAATGTATTGTAACTAGTGGGAATTGGTTGACCAAGGAAAAGGATATTGGAGGAACAAGCTAACATGACCGAAACCTATGTTTAGTTCAGCATTTCCATTCCTTATTCCTTATATATGGTTCACAGA
Gma.5226.1.A1_at	AW830583		0	No Homology to Known Proteins			GGAACTATGAAAATCAGCCTGCTACCAAGTAGGAGAAAAGAGACAACAGAAGTTTGCGTTTTGATGTCATTTAAACCCTGATTTATGAGCTCTGTATACTGTTTTGCAAGATACGCTCTCGCTAGTTAATAAGATTGAGTTTCTGAATGAAGTCTGGACTCTGGAGCATGGGCCCTCAGTTTAGAACTAACCTTCCAATGTTCTAGAAANCTGGTTCATNCTTCAGAGATCCTTACNTGTCTCTTTTGTACAATGTCAACNNCANATGCTTAATGTGGTTTCTAATCTTCCATTTCTT
Gma.5256.1.A1_at	CD408042		0	No Homology to Known Proteins			AAATGCCTCTTGTGGACGTGTGATGGAGGTCACATCTGTTAATTACAAGTGCTGTCATGGTGGTAATGTTGCTGACCATGCTATTAANNNNNNGNCNNCANCCGCAACCTAAAGCTTGAGTCATTCAACCAGGCTTGTTTTGGAGAAACATGAACTTGAATTCAAAGTGTGTTTCTTTTTTACTATATATATGTATGTATGCCTAAACAAGTGCGTTGCCCCTTACGGCCACTTCATTTGTCCTTGAATGGGCNAANATTANATAATGGCATCTTTTGTATGTTCTGA
Gma.5469.1.S1_at	AW349200		0	No Homology to Known Proteins			AACTCTCAGCAACATGCACAATCCTCCCCCGCCAGGCGGTCCAGGCCCTCACCACCACCCCGGCCCACCGGCTCCGCCACTACATGCTCATCCATCTCCTCCGCCTCCTGGGCCTCCACACCACCACCACGGCCCACCCGGCCCACCGCATGCTTATCCAACTCCTCCGCCTCCTGGGCCTCCACACCACCATCCCGGCCCACCCGAACCAGGCTTTCATCAACACCATGGCCCACCCGGGCCACCGTATGCTCATCCAACTCCTCCGCCTCCTGGGCCACCGGGACCTCCCCCTCCAGGGCCTCCACACCACCAACACCACCGTTGCTGATGTAATGCATATGGAGCTTATGAATAACGATCCTACATATATATGATGTAATGTTGAATGCTTTTTAA…
Gma.5535.1.A1_at	BF424135		0	No Homology to Known Proteins			GGGCATGAAAGGTATCCATCCACATGTTTTTACTTTTTTTTTTTCTTTTTCTTATTTCACTTGAATTCGTTTCAATCCATTGATTAAAGCTGGCTTCCCCCACTTGCCTTACAATTCCAAAAAAAAATTGGTGTGCTAATTTTGACATTGTGATGACTGATTGTGCCATACTATTGATGTATTATGATTGTACTTCATGAANATATAAGAAATACTGCATCTCTTTCT
Gma.5773.4.S1_a_at	BG508487		0	No Homology to Known Proteins			GTAAATGTAATCTCTGGTATATGTAAATTTACATACTGAAGGGCATTGGAATTTGTAACACTATTATGATCTGACACTGATGTTAAGACTTGAATATCTATTGATGTAATACT
Gma.5788.1.S1_at	BQ452881		0	No Homology to Known Proteins			ATGGTGCTTCCACATCAGATACTGGAGTCAAGCATGTCATCATACCAGCAACCTAACACTGTTTTTCTTGGCCAAGAGCAATTTGATCCTTCTTTTGATATATCTACCAAAAGTGATGAGGAATTGGTTAAGATTGGTGGCGGTAATCTGTGATTTCGTGTAATATGTAAGGTTGTGTTCTAGGACTGATTCTATCTTCCTTCTAAGCTTAGTTTGTGTTATATGTATTCCTTAATAGATGAGGGAACCTGATCTTCATAGATTCCTAAGGTTCTTAGTTTTCAGTTCAAATGTTCAACACTTGACTAAACATCCAGCCTTT
Gma.5921.1.S1_at	BI468685		0	No Homology to Known Proteins			TCGGCTAGGTTATTTAGCTGAGAAANCNNNNNNNNAANNNNNNNNNNGNGGCAGAATAGGGTNNNCNNNCTTGTCTATCCTTGCTTTGGAAGTTACGGTGGGNAGGATTATTCTGTCTAGGGTTTCGTTGGCCTTGTGAAAATGGTTTATTTCATTAGTGTTCTCACATGGTTTTCTTTTATTTTTGCGTACTTAATTTGTTTGGTGTTTATTACCCTTCAGAGTATGGGTGATGAAGCAGGGAATTATACTGAACTATGCTGATCACTTGGACAATCGTATTGGTTAAATAAAGCCCTAATGTGT
Gma.6153.1.S1_at	BQ611812		0	No Homology to Known Proteins			ATTCAGCCTCTTTCCCTGAAAATGAGTCCAACCCCAGCCATGCAGATGCTGGAGTTGCATGCTAAACATGCTCCCTGCCAAGTATTTGGTGTTCTACAGTGTCAAACCCCTTTTGGGCTCATGCTTGACTGATGCTGACAATTAACATGACACTTATAGTGGGATGGATGAGTGTCAGGTTGGTTTTGACTTGAGAAATTGTTCGCTTTGTGTTAGGTGTTATTAGTGTTAGGAAATCTACTTTTTAGGCTTTCCTTGTTTCTCTTTGGTGTTATCTAATATTGTTTACTGAGTTGTAGCAGTTAGATGTAGGATATATGTTTGAAATGAGTGCATGTGGGTACTTTCTAAACTGTAACCTAACGATATT
Gma.6262.1.S1_at	CD416257		0	No Homology to Known Proteins			TACTCTCCCTATGAAATACGATATGACTCGCCGGATGCGCACTCCTACAGAAGGCACCGTTACCGATCTGTTTCACGAAGTGCCTCGCCTGATGATCCTTATTATGGAAGGCACCGTTACAGGTCTGTTTCTCGGAGTGCCTCACCCAGGCCAAGGAGAAGGTCAAGGAGGAGCTACTCACGGAGTGCTACACCTGTTTCAAAGAGAAGCAACTCACGAAATGTGTCCCCCAGGTCAAGGAGGAGCCATTCAAGAAGCTCTAAGAGGAGTGGCAAATGTGAGNNACGNNNCTCAAGAAGCTCGAGTGTGAATGCAAGTTCAAGATCAGTATCGAGGTCAAATACTCCAAGGTCTACCTCTCCTTCAACTTGAAATTTGTTGGTCCTATATGGCTTAACA…
Gma.6296.1.S1_at	CD400030		0	No Homology to Known Proteins			GGATGGATTAATTTGGTATTCTCTAACTAGGAAGTG
Gma.6368.1.S1_at	BQ613143		0	No Homology to Known Proteins			TTTACCTAAAGCCATATACACGGGAATCTTTTGAGCCTTTTTCTGTGCTCTTCATGTACTTAGGACATATCTTTGCGATACATACTGTGTAATTATGTACCACCCGCGAAGTTGCAATTTTAATAAT
Gma.6426.2.S1_at	AW307409		0	No Homology to Known Proteins			TTTACAGTTAGGTTAACCTGTGGCTTTTGTTTACGAACGGCAATACTGCCTAGTTTATGTACTTCTCATTTTCTGTATGAAGTCAGGCTTCAATTCGATGATTTATTGTCGTTGGTCTGTAAAAGGCACTGGTTGAAAGTGGAAGATTTATTTGAACCTGAAAAGA
Gma.6585.1.S1_at	CD403098		0	No Homology to Known Proteins			ATCAGGTCCCGGTGCTGGTTATGGAGGAGCAGGAGGTGGAATGTATCCCAGTAGGGGAAGCTATGGTGGCAGTAGTCGTTACCATCCTTATGCAAGATAGTTTTATTACTAAGCTTTGCAGTAGAATTTGTATGCAGGTTTAAGCATTTTCTAGACACAAGGCACTTACTGCAGGTGGCCACTTTCTAGAAGTCAGAAGAACCACTAGCATGTCTGTTTTATCTATTGCTTAGACAACCGAAGGTAGAAACATCATCAGTCTAGAGCTTTCTGAGCATCATCAATCTAGAGCTTCCCATCAGTTATCAGCCTATATGGATTTTAGATAGGCACATTCTGCTTTAATGTGATATTCAGATGTTTGCATTAGACTGTCGCTATTCTGGATTCGATATTTAG…
Gma.659.1.S1_at	BU083717		0	No Homology to Known Proteins			AAGGGAGCTTTAATAATGCCACTGCTTGCACTTGCTCTTTCTAGCTATGCATCATTGGGAATATCTCTACTTGTTAATTAGTTTTTTTAGAGTTTGGCGTTTATGCGGCCATTTCCAATTTTTATTTTGATGCTGGGACATGTCAACATATTGATCTTCGCCTAGATGATTGTAAACGTTTTTGAATGCCAAGATTTTCTTCTATTTTTTTTTCACAAGAGGATTTTTTGATTGGACGAATTTAGAGACTAACT
Gma.6784.2.A1_at	CD394894		0	No Homology to Known Proteins			TTTTGTTGAGCCTGCGAAGTAAATCTCCTGGATCAAGTACAGCATGGCTTAAAAAATATATCTAACATCAGGTCATGTACGTTCATTTCTGATGCTGTGCTAGTCCCGTCTAGCTGTAACGTCATTGTCTTAGATATAGCAAAAATGACCTTCACGAACATTGTTTTTTTCTCCTGCAATATTGTGATGGTTCTGGCTTGATAGTTCTCTTTCTCAATTGATTTGGCATTACAATTGTTGAGTTTATGAGTAGTATAGGTTTCCCAAGCATCTAATGTATATATGACAATTAGATAGTTGTTTGTGATTGCTGATGAATGTATTGTAAATTAAATGCAAATGCATTTAAAGANTTCGTCATTTAAGCCATGCTGAATTCAGTTGCTGCTTATAA
Gma.6814.1.S1_at	CD397900		0	No Homology to Known Proteins			GTGCTGGCCACGCCGCAGAAGTCTCCTTCGCCGGCGATTTCTCCTTCCGCCGTGTCACCGTCATCCTCTCCTCCTGCTCCGACGGTGAACGCTCCGTCTCCTTCGCCTACCTCCGTCGACTCTCCGCCATCTCCTCCGTTGTCTCCCTCCGATTCGCCGGCCGGTGTTCCCTCCGTCACTCCCTCAGCAATCTCCTCTCCGCCGTCTGAAGCACCAGCTCCCTCTCAAAACGGCGCCGCTTTGAACAGATTCACTGTCGCTGGATCTGCTGCTGTTGTCGTTTTCGCTGCTGCTTTGCTTATGTAGAGACTAGAGAGGGTTTCGTGGAGTTTTTTTATTTATTATTATCATCGTTCCGAATTTACGCGGATCGTGAATTCTAGTAATT
Gma.720.2.S1_at	BG509704		0	No Homology to Known Proteins			GGGTATCATGATTTTCTAGCATCATGTAGATAAGATGTGCACTCTTTACCTTTTATTTTGTAGGTTCCTTGTAGCGTTTAACAACATTTCTTTTTTGATGAACTTAAGGGTAACAACATATTGTCCAAGGACATGATTGTTTACTTGTTCCTGAGTATCGGTGTGGCATCTTAATTGTCCAAGGACATGATTGTTTACATGTTCCTGAGTATCGATATGGCAT
Gma.7792.1.S1_at	BM091606		0	No Homology to Known Proteins			TGCTATGCCACTCCCGCCTTTGAATTGAAGGAATGCAAATCGTATGGAATGTTTCTGATCTGAATATCTGGTTTTTGCCCATTTATTGTTAGTTGATTGCGTTATCTTTCTGAACTAGTATAGATTGTAATATGAACATCCTAAGACAGTCAACAGTCATATAATTATCCCCACCTAGAAAAGAGATATTTTATTATTCAGTAGTAGTATTGAATTGAATTGGGTTCAACATGATGTGACA
Gma.7864.1.S1_a_at	BQ611662		0	No Homology to Known Proteins			AATCATGCATGCATGTCAGTTAAACCATATTATATACGGTCATGTGGAGAAAAGAACATGTCGGTGTCATTGTTAGTTTACTAGAATTATACCTTAGTATGCAAAAATAAGTTTATGCATGTGTTGTGTCCATCCTGTTTTTCTTTTTCTTTTGTACAAGTAGATAGGAGTCGTGCTTCTCCTTACTGTGTCCAATGTGCAATAATTTCCTTGAAGGGTT
Gma.7922.1.A1_a_at	BU546139		0	No Homology to Known Proteins			GAAAATACCTGCAAACTTTAAAGATGACAAGGCGAAAGAATGGCAAGCGGACAGCCAGCAGCTTGAACGGAATGATTGTTCATATGGGAGTTCTATTAGCTATTACAGGAAGTGAATAGAATACTTGAAGAAACACAATGCTCATACTAACCAAAACTTACATTGAGGGTGCAAGTGCAACCACTGCTTAAGAAGTAGAGCGTCATTTGAGACCTTTTAAATTGTTTTTAGGGTGATATACTGATATAGGTGATTTGTTTTGATGTTGACGGACGATAGTGTAGCAAAA
Gma.7955.1.S1_at	BU551352		0	No Homology to Known Proteins			GAGTAGGAGCAACTCGCGCAGTCCTGTGCGTGGCCATTTCAGCGACCGTGACCGCAGCCGGAGTCCAAGACGTAGTCCTAGTCCAGAAGACAGGCGTCCTCCCATTAGTGACCAATTAAAATCCCGACTTGGTCCAAGAAGTGATGANCGATTGCCAGACAGGGGGAGGTCAAAGTCCAAATCTAGGAGCAATGGCTCTTCTTGCTCCAGATCCCCAGATGCTACACCACCAAAACGTTATGATAAAAGGACTTCCGTGTCTCGCAGCAGGTCTAGATCGAGCTCTCCATCTGGACAAAGGGGTTTAGTTTCTTATGGAGATGCTAGTCCTGATTCTGGGTCAGGGTAAGGTATTATGCTCAGCAGAAGCTTAAATTGCTAATACATTCTATTACAAGT…
Gma.8366.2.S1_at	CA935791		0	No Homology to Known Proteins			TAAATCTTCGGTTTATTGTGTATGAATTGAGAACTGTAAATTTTAAATAGCATATTCACTGTTGCTCACATTGTTCTGTGGTGTCCTCTTTATTATTCTGGCAATGAGAACACATCCCTTTTTGTTCANNNNACTGTAATATTATTTACTTGCACAATTGAGATGCTGCTGTGAAGTCTTTTTCTGAACAAAA
Gma.8564.1.S1_at	BU926782		0	No Homology to Known Proteins			AGACATTGAAAAGTCCCCTCCTTCTGCAGCAGAGGGCTGTTCTTAGAAGATTTTCAGTGCCTGCTCAGAAATACATCAGGAATCAAAAGAATATGAAGTTAAGGATTGAAGAAACATTTTTCAAGAGTCAGGTTGTAAATGGAAAGGCACCTTAAAGAGCTTGGATGAGAAGAGAAAGTGGATGGAAAAGGCCAAGAATATGAAATCAAGTAATAATGAAATCTGACCTTGTATATATTATATTATATGTAGGGATTTTTGTACATATATGTTGTAATTTTCCTTTTTAGTCCTGCTGCTTATCCTATTACTTGATCTTGGCATATGGTTACAGGGTCCAACAGCATCTGTCTAATTATTGGTTATTTTTGCTACCGACGATTTGTTGAAACGGTAACC…
Gma.8614.1.S1_at	BG156767		0	No Homology to Known Proteins			TTCTTTCTTTGCAAGTTTACATCTTTTTGTGTGTGAGAAAAATGGCATGCATTAGCAAGAGCAGAGCAATNNGTTCTTCTTCATGGCTTTCTTTGTGGGGNCTTCTATTTNGCTGCAGGGGTGANNGTGCTCAGACCAGTGAGTTCCCTCAAGCGCCAGCACCAGCACCAACAATGGACGCTGGAGCTGGATTTTTGGTGACTTACTCTGGAGCATTTGTTTGCTCCTCACTGCTCCTCTCTCTTATTGCCCTTCTATGCCATTAATTCTTCATGCTGCAAGGAGTGAAACCTATCTACTCTATTCAATTTATTTTTTTCTTCCCCAGATTCTGTTCTCTTATATCTTCATT
Gma.8648.1.S1_s_at	BU764853		0	No Homology to Known Proteins			GACCCTGAGGATGATGAGTAGCCAATCCCCTTCTGCAACACTGCTTGGTATAATTGAAAGTTCTGCTTAACTTCGACATTATGGTGTACCAAGCTGAAGTTGTTAATATGTAGTATCTCATTAGATTGTTTTAA
Gma.89.1.S1_at	BI943909		0	No Homology to Known Proteins			ATAAAGGATTTGACCTGCGGATCATGTGGGTGTTGGAAATTATTATAGTCTGAACCTCCTTGTAATGGAATATGTATTTGGATACATAAAAGTGTTGTTTAATATTTAGTTCTTTAATGAGAGTAATGTACCCTGTAACGCTGTAGTTGTAAACTTGTAACCCAGTATACCCTTGTTTTTGTTCTACATGTCCTTTCCACCCAGCCTCAGTCTGACAGAGATGAACTACTATGTACCATTAGTCCAA
Gma.8928.1.S1_at	BU763682		0	No Homology to Known Proteins			GCATTTTGCTTATTGTTTCAAATCTCATTCAGAATAATTTATATGAAAAACGTTTAGTCGTGACGTGTGAATTGAATTTTGCACTCATTTGTAAGATTCTTTGATAGTATATACAATGTTCCACTTGTACTCAAGTTTTATT
Gma.9219.1.A1_at	CD406260		0	No Homology to Known Proteins			GAAGAGCTAAAATGACAAACTCGTGTTCCTTCACACCCTGCCTGTACATTAACATGGTGGAGTACGATATTTCATGTGTTAAGGCTGTGGCAAGCTCTCTGTACATTTACNNAATTCAGGGTGTCCCTCCATACTATTTAATTGTTCTGTTCTAGANNNTTTTTTTTTTGTCCTGTTTTCAATTTTGTATTTTGTTTAACCCCCATATTGAGGGCCCCATTGTTAGCTGCGTAGGTTTATGGTTGTACGCATTTGTTATTCTTTCACATTGGTGCCCCATTGNTTTAGCGATGATACCANTGAANGTAATTAGTTCACCATTCATATTTCATACCAGATCACACAATAGCTGCTACCTATATATACTCCCTAGTAAACATATATCACATTTAATCAAAA…
Gma.9238.1.S1_at	CA819551		0	No Homology to Known Proteins			GAGGCTGATGCTGATCGTAGCCAGTGGAAGTCATCGAGATCACCCCCTGGATCTAGATCAAGATCTGCTGAATTGTCACCAAGGCGTGGAAGATGAGGTTGCAGGTAGCTGGCAATGTGCTGCTGGGGCTTCTGTACATTTCCTGCAACTTATCGCAACATTTGCAAAATCCTGTATTTTGCTTGAAGTTTGCGAATATGATGGATGAATGTATAATAATTGACTTGATGTGCGGGTTTTATATTTGGATATTTTGAACTTTCATAACTAACCGTGAATGATGAATTGTTGAGTTTGTTTTATGACCCTATGTTTTCAAGTTGACTGTTGCTGTTGTATTAGCTTGTCACCAAGTACAAATTGCAAACTAAATTGTTATCTGGTAAC
Gma.9252.1.S1_at	BI786435		0	No Homology to Known Proteins			ACTTTCGTGATGTTGTTGAACTTTCTTCCGTGATTTACTGTTATATATCTATCCTTCATTTAGTTTTTCGTCGATGGATGTTTCTTTTATTGTAATTCAGTGTGTCTAGCCACCGGAATTAATAGAGGTTATATACTATTAAAATTTGCGATCAAGGTTTTTTAGTGTTGT
Gma.9329.1.S1_at	BQ610137		0	No Homology to Known Proteins			ATTTGATATGGGAAACTGGGTTGTTGAGGCCAGTTCTCACATTTTGCTTGTCCTGAGTGTAAAAGTATTGTTAT
Gma.951.1.S1_at	BE823945		0	No Homology to Known Proteins			AACTTAGATTAGCTTTACCCGCAGTAGGTTGATCCTGAAGTAATCCTTTTTTCCCCCTGAAATGAATGGATTATGATACTTGGGTAATTTCTTTTTGCAATGAAATGAATTCTGACTGTTTCTTTGAACTTGGGTCCCTGCATGGTGGATGGTGGTTAGGGTTTGTCATGTAAAGCACCACATTTGTTCATAACTGTGACACACCCGGAGAATTAATGCTTTGGATATCAGGGGAGCAATTTCCATTCCTGAAACCCGAGCATATTTGTATGCACCCGACGAGCGAACAGATAAGTTATAAAGGGATGCAGTTCCCGTTGAGAATGGTGTGTTTGCGCCTCTTATATTGGAATATACCAAATAGTGATATGGTGCCCGCATTATAAATATACTAGTATT…
Gma.954.2.S1_at	BU965254		0	No Homology to Known Proteins			TTCTTTGGCTTGTTGGGTCATGTTTTTGAGTCAAAATCTTCCTGGAAAATGTCACCTCTGGTTTGGTAAAATTTTCCATTAATGAAATTGAGATCGATAAAAGAATGAAGATATATANNATATATATATATATGGCCNAAGTATACNNNTTCATTCTAGTGTAATGAGGTCAGATGTTCAGAGGGCTATAGACAGCTGACATTATACCGAAATCCGCGTGGATCTCTTAACCTGATATTCGTCACGTCACACANTGGATACTCTTGTTTATAATGTTACATTTCAAATTAATTTCCCTCTTCCTCCCATACTAACCTGTAGGGA
Gma.9809.1.S1_at	CA937534		0	No Homology to Known Proteins			TCCTCGCCATAACGTTTTCACTTTCAGTTTCCCCTCTTGATTTCTCTTTGTGAGAAAGCAGCAACAGCTCCCCTCACTCTATTTCTCTATGTCAAAACCACTATCCCTGTCCCTCTCGTCCCCAAAATCAGATCTCGCCCAAAGTGCGGCGGAGGTGCTGCGACTGAGTGCAATGGCAACAGAGGTGCGACGGAGGTGCTTCGGCGCGATGCAGCAGCAAGTGAGGAGCGACGGCTCGGTGCGGCGGCAAGGAAATTGTCGACAGAGGCAACCACACTCACTGCTGTTCTTCTCCTTCTTCAATTTTAATTTTTTTTTACCTCTTTTTTGGGTTGTTCATTGATTGTAGCTGTC
GmaAffx.10636.1.S1_s_at	CA851343		0	No Homology to Known Proteins			TGGAATTTTCCTGCTCCTTTTGCACAAAACACACACTCTGCTTCTATTATAATTCATGCTTGTCCTTGTCCTTGTGCTGGTTTTTTTCTAGATAGGGTTTGCACTTTTTAATCAGAACTAGCCAAGACCAGGTACAGAAAGTAC
GmaAffx.10903.1.S1_at	CA802066		0	No Homology to Known Proteins			TATCATTTCTTGTTAGTTTTCCTGATGGTGTCTAGAGAATACTTAATAGTGTCCTAGCTTTTACTTGTTAAGTGTATTTGGTTAATCTAATGAATTCGTTTGTA
GmaAffx.10915.1.S1_at	CA802695		0	No Homology to Known Proteins			GTCATCGTTACTTTTATATTTTCTTGTCTGATGTTTTCGATTTGACTATTGTTGTTTTGACGGAGGAAGGGGATGTGAGATGTGNTTTTCTCTGTGATGATGAAAACGATGACGAGTCTGATAATCCATTCTTTACAATACTGACGACAAATCGAGGCATTTGTCTGAGAGGATTCCACTCTTTCTTCCGTTTTTTATTTTTTTGGCGTTGTTTAATTTTATGCCTGTTGTTTGTTATTTTAAATTTTATTTTGTGCCTTTTGAATCTAGGCATGGTGATGATTGTTTATTGTCATCTGATGAATCATTTGATGAATTCCAAACCTCCTACTCATTCTGAATGCCTATTGTTTTTTCGTTTTAGTGTTTTTTTTTATTTTTTATGGAGAAGGTAGAGAA…
GmaAffx.11166.1.S1_at	CD403849		0	No Homology to Known Proteins			GGAAAATGGCATTATCTTCAAAGAAACTTGAGAAGAATGGNCTTGGTTCTAAATTAAAGAAGACAAGGGTACTTGTTGAGGTTGAGCGTGAGGACGCTGGTGAAAGACAGAGGATGGTACAATAGTTGCATTCGCCATTGTTATGGACAGGAGAGGAAAAATGCTATAGCAGAATCGGAATTTTGATTATTGAGTCTTCTATTTTTTTTTNCAGCTTTTGAAATTATATAGATTTTCCTCTTTTCTTTTTAATTTATTTCATATTTGTTCTGAAGAGTTCTGGCAAATGCCATAAATTGTAGTCTNGGGTTGTTTGATATAGGTGGAGCATCTCATTCCTGCATTAATTGACCATTAGGGTGTTTTTATAATTTTCTTGGGTCACGCAGCTCAGCCAGG…
GmaAffx.11220.1.A1_at	CD415475		0	No Homology to Known Proteins			TATCATGTGGCTTTGACATGGGTGAATGCCTTGCACGTGTTCTCGGTTTTTTTGGCACGTGCGGAAGGATATATATTGATGGAGTTTTTTTTTTTCTTTTCAGTATTATTAATTATTGGGCTTTATTTCCTATTTTGTTCTTTTGGTTAAATATATATAAGTTTGGTAAGACACCGGGATTCATGGGCGTTGGCTTGTGTTGAAAAAGGAACTAAGTAAATTATTTTTTTGTTAACTTTTATGATTGATTTTTTTTTTGTTTACCNAAGAATAGCCTGTGGCTTTGGATCGATATTTGTATG
GmaAffx.11781.1.S1_s_at	AW306744		0	No Homology to Known Proteins			TTTCCCTTAGTATTTCTTGCGAAATTTCTTGTTTTGTTCTGGCTTTATTTTAGGTAGTGTATATTTTCTTGATGACATTGGTTCCCTGACTGAAACGTAGCCATTCTCCTAGTGGATCGATATTACAAA
GmaAffx.11803.1.A1_at	BM143803		0	No Homology to Known Proteins			CCCAATCTGATGATGATCGCCCTAAAAGTGCTGAGAAAGTGGAAAATGAACCTGATCAAAAAAAGGAAGTGGAAGATGAACACGTTGAGGAAAATTGAAGATCTGTCAATTTACTTTTGGTCCCTGCAGATTGATCGATAAGAGAGTTGGAAATGAACATTGAACCTCGAAAACTTAATTTTTGTTTCCCATTGAAGTTTTGTCCGTCTTTATCTTTTTCATGTTTTATTGTGAGTGATTAATACTGAAACAGTTGAGAGACATTTTTGATAGCAGT
GmaAffx.12258.2.S1_at	BU549964		0	No Homology to Known Proteins			AAAACTTAGAAGCACTTGATCCTTTNGCATCATCAANACATCAAAACATCTTGCTTCTACATAGGAGTCATTTGACTTAATCCATCANNNNAAANATCCTTCAACTATTTNTCGTCCTTGGAAAATTCTTTTTNGCAAGAATCAANTGCNTCTTTCATTCTTCCTCACTACGAGGTTGTGAAAACAAGACAACAATTGGTACCTCTAAGCCCTACACTGGGGCAATGAAAGGCNCCATGCATAAACCTCAAANGAACCTAGGGGCAGATTAGAAGTTCTCACNCAATAGGTTCCCAGCTACAAGGTCATGACGAAAGACAACGATTGGTACCTCAAAGCCTTACACTGGGGCAATGAGGGGCACCGTGCAGGAGCCTCAAGTGAACATAGGGGCCGATC…
GmaAffx.1301.78.S1_s_at	AW394497		0	No Homology to Known Proteins			CTTCTCAAGTGATCTGAATTTAGTGTTCCTTTGACATGTCTAGTGTTTTTCTTGTTTATTTCCCTAGATTTCATCGTATATCACTTGTGTTGGATGTAATCAAGAGATCANTTTTATCAAATAAATAATGCCAAATGGCATGTCGAAGTAAAA
GmaAffx.13587.1.S1_at	BG654181		0	No Homology to Known Proteins			TTTCTAGCCCCTTCTACGAGTTTATTTTTTGTTGTTCCTTTTACCAATCTCTTTGCTATCTATCATCTTGTGTATATAAATTTTGCTGACCAGTAAAATAGTATGATAGGAACTCTGAAAGTACCATTAGGGATCTTTTATGTGCATGTTATGCCTCCTTGTTTGGACTTCTCGTTTGTGTTAGTCCCACTTAGTCTGCATGT
GmaAffx.14577.1.S1_s_at	BM528204		0	No Homology to Known Proteins			AATGTTGTACAATATATATGTGCATATGTATGTAGTAGTCATTCCACAATATGGTAGCATAGCTGTCTAGTATGATAGACACGTCTGTGTCGTGTTGCCGCAGTTAGATTCACAGTTTGACCGTATCCATTTTTGTTTTGAGGTTAAGTTTAGTTTTCTCTCTTGGTTAGTGATAATAACACGCAGTTACC
GmaAffx.14710.1.S1_at	BE020745		0	No Homology to Known Proteins			ATGCATTCTATCTGTCTATTCTGTTTTGTTGATTCAAGTTGTTTTTTGTTGGATTGCTTTGTAAAGGCTGTGAACTTGTAAATGATTCCTATACTCGTACTTTTCAAAGAAATTTATTAACTTTCTTATTATTGGCATGCGTTTATTGTTGAATGAAACCAACATTTGGTGCTCCCATTTCATTTCAAACTCATGCTTCCTGCTTTTGATGACGTNCTGCATATTGTTCATTTGTTTGCATAAAAAGAAACACATGGCTTTCTATAGGCCAATCTAGGTGTCGTGTATAACACATGATAAGTTGATCTAAGATTTGAAAAGATTAACCAGTAATTTTTTCGAATCTCTATATCAAGTTCTTACAAGTATCTTATAGGAGCTTCTGCATGGCACTTCAGA…
GmaAffx.15120.1.S1_at	AW704305		0	No Homology to Known Proteins			CTCCAATGGCCCCATTATTTAGTTTNGTTCGCTTCCTTTTTCTCTCCACCTGAAATCATGTAATATCCAGCCTTGTATTATTCCCAAACAGTCATCCGTGGTTAGTGGCNTAAGTGTAGTTATTTAAAATCAATAACTTGATTCATTAGTGCATAACAAAGTATCGTTAAGCCTTTCATT
GmaAffx.15180.1.A1_at	BU548170		0	No Homology to Known Proteins			TGTATTTCCACACAATCCCAAAGACCATTTTCTGCAACATGATAACAGGTCTGCTGCTGGAGTTTTAGAGCTAGAAGATGGAAGTGCTGGTAGGTAGTGCTAACATGGACCATTTGGAAGCATTGAAACGGGGTAGTCTTTGATAATCAATCTTTCGAGGGAAGCAAAGTGATGGATGATGCATTATTTCTACTATGGTCTTGGCTTAAGGTTATGGAGAAGGGTTTCACAATGCACTTTAGCTACTGGTCCTCCCACCTGAAAGCAGTTTTCTAAAACTAGGGAGTGGCCATGTTTGTAACAGTTTCAACTAGATTTGCAGGGCATGTATATTTCCTATATGGGTTCAGTCAGATTCT
GmaAffx.16367.1.S1_at	AW306325		0	No Homology to Known Proteins			GTTATCCTTTATTTGTGGCTGCCAGATTGGCGTCTGGGATATTGTCCTTGAAGTTTGCTTCCTGATATAAATTGCAATTTGTATCGAATTTTAGTTTAGGCTTATTGTACTTCAGTCCTTTTTAGTGCCATTATAGCTTTTACTTAATTTTAATGTCTTGCTTCTAATTATTATAATTAAGTCTTTTCACGGTTTTCTTTTACTTAAAACTTGGCTTTTAATACTAAATGAAATTATCATTCACTGTACTGAACAGCATCCTACGATGAATAAAATTTTGATTGCCACAAGTAAA
GmaAffx.16409.1.S1_at	AW317152		0	No Homology to Known Proteins			TTGGGTCTGATTTCCCGTAGTCTTTTGTGGTTGTTAGTCCTGTGTAGGTTAGCCAACCATGTTAGTTAGGACTATTTATACTGTTGTTAATCTAGCAGTGTTGTTTTTACATTGTAAATTATGTTTTAGTGAAACTCTCTTCTTTCAGATGTTATGACCATGTACTTGTTTATATTGCAGCA
GmaAffx.16435.1.A1_at	AW349827		0	No Homology to Known Proteins			CTTTTGTTGAAATTGAATGCATGGGGATTTCGTCCATGCATTCGAGTTTTGGTTCAGTCTAGATTCTGAAGGAAAGGTACCGCTGTGCTCGGTCATTGCATTTTATACTTTCATTGGAAGTTCCAGGTCATCCTTGTTATATACCAAAGCTGTACTATTTTTTTTGTCACAATTTTGTGCATTTAGCCATCTGTAGTGTCAATTTAATGGTTTTTTAAATATTGAGAAGCTTGATAATGCGGTCAAAATCAGTTTGAGTATGCCACTTGTA
GmaAffx.16438.1.A1_at	BE023899		0	No Homology to Known Proteins			GGTACGGCGACATAGGATCACATATCTGGTGGTCAGATGAAAGAAAACTCAAAATAAGCAAAATGGAAAAAGAAAATCAGCTGGTTGATGGAAAGCTGGCTGGGTTGTGGAGGTTTCGTTCAGGTCAGTCAGGGTGTAAACCAAACTGGTCAAGTGCTGAATCACCGGTTTTTCAGGTCTGGTTTTTACAACTATGATCCGCATATCAGTTACTGATGTATTCCATTTTTCTTTCTGTACGAGGAGGGGATTGATACGATGGTCAGCCCATTTAATTATTTTTTACCAGCCNNNGGNNNAATTTATNNNNAATGTTTTCATTTCCCTTGCGTTGTTTGTTTTGCATGTTTTTGGCTGTCGTTCCCATTTGAATAATA
GmaAffx.18238.1.S1_s_at	BI425796		0	No Homology to Known Proteins			TGTTTGATGCTCTCAATATAGGCTTTTGTGTGATGTTTTCACTCTTGCCTTTTACCACTCACTCCCTCTTAAGTTCCTGGA
GmaAffx.1861.2.S1_at	AW102340		0	No Homology to Known Proteins			TGTTTAGCTGTACATTCCTCTCAACTATATCTTCTGTTCATTTTCATTAGATAATGTCACAATGAATTTTTCTATGTTCATTGGATTCATCCTCTTGCAATGCAGGATGTCATAGGAATGGACTTTTCATTTGTTAGTGACTTGGAGCTGGGTAATGTATGTAGAACTAACTTGGAGATGTCTGCTGTGTGTACACACTTAATGGATACAGTTGCAAATTGCAATTTAGGGTGGGGTAGAATGTTGATATCATAGTTCGTAAAATAGGGATGTTATGTACTCCAAAACGAGGGAAAGAAAAAGAGATAAGCAAAGTTAGATGCACAGCCAAGGGTACGTTGCTCTACCAAAATGTGTTGGTTTTCTGATTCAGTGAATTATTCTAGCATGGTTTTGTTT…
GmaAffx.18709.1.A1_at	BI967583		0	No Homology to Known Proteins			AGTATAGTTCACATCTGAGTTTGTTTGTAGCGGCGCAGTACTTTGTGAACTTCTCAGTGTCGTATGTGTCCCACCTGACTAGAGTGTTGTATATTGTTATATCTCAGCCTTTGGTTATCTTTTACTCGTGCGGCAAGCCTGCTTATCAAGTTGAGA
GmaAffx.1917.1.S1_s_at	BQ298997		0	No Homology to Known Proteins			GAAAGCTACAAAGCTATGCTTAAGGTTTATGCATGCCACTTGCCATTTTTTGGTCTTAGTTAGTTATCTTGGACATTACTACATTCCGAAGAAAACACGGTCTCTCTCCTTTGTTAATTAATTATA
GmaAffx.20724.1.S1_at	AI973750		0	No Homology to Known Proteins			TTAAATCTTTTGTGGGTCATTCATGTGGCGGTGAAAGATATTCTGGAGCCAGAATGTTGGAAGCATTTCAAATGTGATTGGTGAGATCTTTAAAGCTTACCGTGTTTGCTTCTGGATCATAACTCAAAACCT
GmaAffx.21062.1.A1_at	BE820248		0	No Homology to Known Proteins			TGGTGTTTGTTGTTTTCTTAAGGTGGTTATCATATCGTAACTCGTAACCATCTTTCTGATTTTGGGTTAGGAAAATAATAGTAATAAAGGAGCTTCGGTGTAATACATACTTCATTTAAGATGTGTTTCTCGGCTTGGATGAGAAATGGGAGCGGAAAATGTGCTGTCCTAAGTGGAGGCGTTCGCACAATAGGAGCATGCAAGCANNNNTTTTGGTTTTTTTGCCTTTTCTCTTGAAATTTCTTTGTTGTTGACTTTTTTTTATATATCCCTCTCCTTTCTGATATTTGAT
GmaAffx.21299.1.S1_at	BF424037		0	No Homology to Known Proteins			TGGCAGTTATCAGAGGTTTACCGCTCAGTCATGTGCTCGATGTTGGTCTGGTGTTGGCTTGTAAAGGAACTGGTGTCTGGAGGGAAAGGGTGGGAACCTTTTCAAAATTTTTNNNTTTTANNAAATCCTCTAGTTTATTGGAGTACTTTTTTGGTGGGAGAAAAAAGGAAAAGCTTGTAAAAACACTTGTAGATAGTTTTCTTATGATGAAAATGATTTCAATCGATCAACTTTGGTGCCTATTGTAATGTGACNTGGCTAGTTCATAAATTATTGCCTCTTGTTACGTGG
GmaAffx.21302.1.S1_at	BU547335		0	No Homology to Known Proteins			CTGATAACTTGGGAGACAGGCAGGAGGATGAAGGTGTCGCTGCATCTCTTTCCCTCTCTCTGTCCTTTCCATCTCCAANNAAGGAACANACAAANGCTGCAGAGCTTTTGCCTGATGGGCAGCGTGTGAACAACNCGTTTTTCCTTTTTGGGAGAAAATAAATCTGCTGGCTGCTTANNTGNTTGNNNNCAANCATNTAAATTATCTTATCTTGTTCCNGATGGCCCAGCCTGTATGATANATAGATATAATCTTCCAGCCNCNCTCCCTACANAAAGGAGCCATTGTCCTCAACAAGAGTCAATAAGTTTTTTTTTTNAATCCTTTGTTANATACATGTTTTTNTGNTAGTTTTTTTTNTNTTCAGAATGCATAGTTAACGGCTGTTTGTATATATAG…
GmaAffx.23647.1.S1_at	BM308200		0	No Homology to Known Proteins			TTAGGCATTGCTGTTTGGTAGTTCAGTGTTTGTAATGGTACTTCTCTACATAGCTTGTGGACAAGTCCCGTCTGTTACACCTGGCATTAGCGATATGATTTGGAATTTGTTTCTCCTTTCACCCTGCGACTTGAAAGGAATTCCTTAATTTTAATTTTAGACCCAGCAATAGTTTTTGTCTTTAGGGGGCGTTTGGTAGAAGCTAAATTTTTTGTTTTCGATAATCATAGGTTTGAAATAGTTTTTCATGTTTGACATC
GmaAffx.23731.1.S1_s_at	BM524230		0	No Homology to Known Proteins			CATTTATTCTGTGAGATTGTGAAGCAATGTGTAATTATCACAATTGATCACGGCAAAGAACTTCATTATTTCCCAAGGTGTACTTGTTTAGATTAAGCTATTTTAGTTTAGAGAATCTTATACTTCAAATACCTAAACCTAAATAATATTTGGCTTTGTTTTTGGTGT
GmaAffx.24368.1.A1_at	BU545331		0	No Homology to Known Proteins			AATTATCTTAATCTTACCCCATGTATTTTCATTGGTGTTCTTGTATTATCTCTTTCTCGTTTGTCATATTTTGGGGCTTTAGGGTTATGCAATGAATTAGAATTAAGAGACGAAGAGAATACGTACGTTGATTTTTGTACGTAGAGGGATGGAGAATAANNNGATACGTGGTAGTGTGATAAGCTAGAAAGGGTAGTTGGTTTAATTTAAATGCCTTTGTAATAATTGTGTGTACACTGAATTGGCCACTTTGGTTGGTGAATACTTGTTGTGTTTCTGTTAGGAAAAAAGTATACATGGGAGAGATTCATCCAACCCTGTCATTTTCTTTTCTTTTTTGGTCATTGTCGTATTCATATTGTTGCTATGGCTCTTTCGTATATTCTGGATTTT
GmaAffx.24507.1.S1_at	BU760930		0	No Homology to Known Proteins			TGAGCATTAACCCTTATAAAGTAAGCTAGTACAAGGTAGACTTAAGCAATCTCATTGCCCTGAAAGAAAGCTCAGTAGGTGGATCTTCTTTCCAGGTCGCAGGTGGAGAGCCGGTTGAAAGGCCTTCTGCC
GmaAffx.24622.1.S1_at	BU926989		0	No Homology to Known Proteins			GTTCTGGTACGTGAATAAGAGCGACTTGGAAGCCCAAGGATTGCAATGTAACTTTGCTCTTCCCAGCTTTTTCTTTTTTTAATTTCCTCAAAAAAAAAAAAAAGATTTATCGTCTAGATAGATAAAAAAAAAAAAGGCAGACAGGATGGAGCCAGGCAGTGGTAGTTTTTAGTTTTATGGTTCCTTTTATAGAAAATAAATAAATAAATTTGGTCGAAATTTCTTTTTCGTACTTTTGTTCCCTTTGAAGAGGAGGGGAAAGAACATAGAACAGGCCAACGTTTTTTCACTTGGGTCATGTCATGTATCATTGTTATCTAAATGCGTATTCGATTTTCTGATTATTTATAATCCATGCGTGTATGTGAGCTTAGCAA
GmaAffx.24792.1.S1_at	CA819334		0	No Homology to Known Proteins			TAAGAAAATTTAGTTTGAGTCCTGAAAATAAAATAATTGTGGAACTCAAACAAGTTGTACCAAAACCTTCGTCTATAATTTTTACTATTTCTGGACTGCACCCTCCCAACCAAAATGACCCATTACTCGCAACAAATAC
GmaAffx.24874.1.S1_at	CA935208		0	No Homology to Known Proteins			TTGATCCTACTTCTTTTTTTCTATTTTTGTTGTGCCATGTATTGTTTCTTTAGTTGGATATTATGCTATCAAGTTTTTTGCTTTACACAGGGTCAGATTAAGAATTTAGAAAGACCTAGAGTTCTATTTGTATAAATCATTTGCTATTATTCATATGTAACCTGAACCCTTTTATGTAAGCAATAATTATGACGTCTAAA
GmaAffx.251.1.S1_at	AW311555		0	No Homology to Known Proteins			GCATTGATGTCTTTGGAGTATTCACCGTATCCACAAATTTAGGTCTCAGTAGCTTGATATGGTTGGAAAATTTTTGCTTGTTGCAAGTAATTTAGGATTAAGACTATTTGATTATGGGGAATCACAAGACCGATTATTAAC
GmaAffx.27505.1.A1_s_at	BI273666		0	No Homology to Known Proteins			AGTGGCAGGATGCTATATTCCACGGGGGCTACTAGATATCTGCCCTATTTTTTTTATACATTTAGTTTTTTTTTGGGTGCATTGAATCTGTCTTGTTAGTCTGTGTTGTAATGGCAACTTTTTT
GmaAffx.27632.1.A1_at	BI969421		0	No Homology to Known Proteins			GGAAAAACACACCTAAATGAGGCAAAGTTAAAGGAGTCTGATCTAAGGAATCAAGATGATTAAGAAAAGCAAAGGCCCAGTAAGAGAAATGAGAAAAGAAAAGAAAGTTTGAAAGTACTCCCTCATGCTGTCATATTTTGATCCGTGTATAATAATAAATGCCATATTGTATTTGTCATATTTTGTATAATAAATGTCATATTCATCTAGAGTAGAGTCTCTACTCTCTACTTAATCCAAGCCCAACTGCAAGTAAGATTTCCTT
GmaAffx.29421.1.S1_s_at	CA852386		0	No Homology to Known Proteins			AAGTTCTCACGTATAATTGCCACTAGACCAAAAAGTACAAGATAGGAACATTATGACCTGCGTATGCTAAATGAAAGTGCCAGCTGACTGTAATTTTTGAAATTTATCAGCATGTGAATACATTATAATGACCGTCTGCAATATTTCTTATTTTAAAATGATGCTGACTAC
GmaAffx.29585.1.A1_at	CD397532		0	No Homology to Known Proteins			TCGGTGCTTTTCTGACTCCCATCATCTTCTCATGCTTTCTGATTCAATAATTTGAATGCGTGTATCGCTATTCACTCTGTTTTTTTAGGATTTCTTTTTCAATGTTGGATAGTTTGCTGGAACGATCTTTTTAATTTGATATTTGTTTTTCTAATACTTCACTCAGATCGACGTTCATAAACTGTTTTAGTCCTTTTGACGCACATTCACAAGTTAGGGTTTTTGTTAGTACCATCTGCCCCACCAGTCATTTCGTGCTTTACCAGTTATCTTATCTGGGAATATCTGCT
GmaAffx.29602.1.A1_at	CD402305		0	No Homology to Known Proteins			CTTCCTGTGTATAAATAAAGCTACGAATTATTTTTCATTTTCCTTCTGGGTTCATTAATTTTGTTTTTGGTTTTTGTTGCATTTATTGCTCTCTTGTTGACACATCTCCATGTGTCTG
GmaAffx.30028.1.A1_at	BU544443		0	No Homology to Known Proteins			GAAAGTTGATGGTAGTGGCAAGAAAAAGAAAGGTGGGAGTGGATTTCAGGTGGGGAAGAGAAAAGTGAANNNNAAGTTGACTGCCCTTGNNAAANCTAAGGCTGCNCAGGCAATGGAGCTTGACAAATGAGGTTCGACTTGTGTAATTTTAGNCAATGTGTTGAAAATTGGTAGATGACAGTGTTGTTTTGAGGCTCAATATCCTTGTTCTGTTNNGCTATATGACTATGAGGTTGTAAGTTGTATATTAGGTGACTATT
GmaAffx.32629.1.S1_at	CA784365		0	No Homology to Known Proteins			AAAGGAGGAGAATTTAGTAGGCACGGAGGCTTATGGCATGCAAGAAATTGAAGAAAACAGAATTTAAGAGCAAGAGTNNNNNNNNNNNNNNNNGNNNNNNGNNNTNTTTNTNNTTTTNNNTTNTNNTTCAGGNTGAATTATTCATTTTTTTTTTNGGNGAGTTATTTATTCATTATTTTCACACCCAACGAAAATGCTATTTTTTAATTTTGTCCCCAATTGATATAAATATCCCAAGGAAGTGGAAAAGAGTGTTATTTATCTTTGACANANNNNNNNNCTTTCTAGATGCCGTCAGATTTCATTGTTTCATTGTAATTTTTTATTTTTTTTTATAGATTATCCCTCTTCTCAG
GmaAffx.34650.1.A1_at	AW350630		0	No Homology to Known Proteins			CGGTTGTTTCCATCGGTTAAGTGCATGCAGTATCCTGTTTTAGTGTCATTGTGCTTGGAGTGGCTTGTTTCAGTGGTGTTATGTGTGAAATGTGTTGTTTTCGTTGTGGGTCCAATGTAAATAATGCTAGCTCCCGCTTGGAATNTGCATGTATGACTTGAATACGCATTGCTATTAATAGTAA
GmaAffx.35464.1.A1_at	BE657554		0	No Homology to Known Proteins			GGCGTTTTCCAATGGTCTAATATTTAGTGCATCTCTTCTGCCCTAAGCTATCTTTGGTGGAAGATTTGGTTCTATTGTGGTGGTAAAAGGAAACCCATATAATGAAGAGAATGATCCTTGCATGTTAAGTGGAGACAGGGTTAGACCTTGCAAGTTACTCAAGTTTAAAGAATATCTCTCCATGCCTTCACCGTTCCTCTTGATGTGGTTCTCTTATCTCTTGGTGCTATAGCTTGTTATGTTTAGAACAATTGGTGGTTTGCTCTTATTAATTTTTGTAATTGTAGAGACCTCCAGAACAAAAAT
GmaAffx.37221.1.S1_at	BM523361		0	No Homology to Known Proteins			TAATATTGTACTAATAGGATCCTAGTAGCTAGCTAGCCATGTTCTCCGCTGGCATAATATTATTGTCTGTTTGCCATGTGGCTTTAATTCTGGCTCTGTCTCGCGTGTTAAATCGTGTAGCTACTCTGTATTCTTGT
GmaAffx.37663.1.S1_at	AW734686		0	No Homology to Known Proteins			TGATATATGCACAGGTTAGCCTCCANNNNNAATGTGTCACTTCTCTCTCTTATTGTTATCGCCTTGCACTTGCAACATTTTCTTTTTGGTATCACAACTGGATTTGGTTTGTAAAATTCCTTTGAATTCTTCATATTTCTAACAGTATACATTCGTGATTC
GmaAffx.37740.1.S1_at	BQ741823		0	No Homology to Known Proteins			GCGAGTACCACATTAGTCATGTCACTTGCATAGTATGGGGGAAATACTACAGATTATCATGGCACTTTGATTTTCAGAAATCCACTTCACTAGGATTATAAGCCGAAGTGGAATATTTTGTTTATAGACACTACTTTTGTATGGTAAATGTGATTAGACTTGTTATTGNAGAATTGGCACTATATATTAGATTTGTATGGTATTAATACTGTGTCTTTTCAGGTTCATTAGCTTGCTATAATGGTTGATGCTTGTCTTTCTT
GmaAffx.39568.1.S1_at	AW760030		0	No Homology to Known Proteins			ATGTTTTCCGCCGAGGACGATCATGTGATTTGAACCGTATCCGAGGAAAAGGGACCCTCACTTGATCCAACGTCATTTTAAGGG
GmaAffx.40997.1.S1_at	AW100769		0	No Homology to Known Proteins			ATAAATCATGTGACCCTCTGGACCTGGCCCCTTTTTTGGATCCAATTATATCATAAATTATCCGTTATTGTATAATTTGTGTAATAGTTTTTAGTTGGGAATGGCCATGATGCGCCAGAGAAGCATATAGGTAGTGCTATGCATTCACATGTTTTATCTGTGGTTTTTTCCTTTTTACGCGATTTTGTTGTGCTGTAATAT
GmaAffx.41532.1.S1_at	BI973656		0	No Homology to Known Proteins			TGATTTTCATACTTCAGCTCTCACAGTCATTCTTCTGCTATCCCATTTTCCCTTGCAGTTCTTTATGGATCCTTTTGTCGTGCTATTAGTTTCTATGGCTTTTTTGGTTTGCATTTTGTTTTCATCATTGAGGTTTTGTATCAATTATATCCTTTATTGACTATTATATGACCTTGGAAATTCATATGTTCATGGGTTTAATACATCATTTG
GmaAffx.42109.1.S1_at	BQ080704		0	No Homology to Known Proteins			TGTTAGTCTTTAAATGTCTTGTAAACATAGCTCTAGATTTGGCTACCATCGTTAATAGCTTGATATCCTGTAAAACTAGCCCGAAGTATTTAATGTTCTATAG
GmaAffx.4211.1.S1_at	BG362818		0	No Homology to Known Proteins			TCGAGTTCAATTTGCAATTCAATTGATANGTTTCTGTTATCTGCTATTGAGGATGACTAACGGNTTTNTAATACAGGAAGTTTAGACGTGGTTCAGCGAACACATTAAAAAAATCGTGTTTTTATTTTATATTTATACTGTATCTACAGTTTTTATGTATTTCAGAAATTCAGTATACGTAGNTTTTTATTANGTTATTTTAGTTATTCTTTATGTATACATANTTTTATGTATTTATATCTACTGATGTTTATATTGTTCCGAGACGCATGGATAATTGGAAAATCATGNCNGTTGTCGNTTTNGATGTTAATTGAGCCAAACCAAAATATATTATCAGCCCAGTAAAGTAGTTTTAATCTTTTTTGGTCCCCTCTTAATTGTTACTTTTTCTAGTAA…
GmaAffx.42925.1.S1_s_at	CA802660		0	No Homology to Known Proteins			TTGATTTGGCTTGTAGTGCCTCTTTGTGTTAGCCTTTGTATGGGATGTAAAACAGTGTCCTCTTGAAGGAA
GmaAffx.42933.1.S1_at	CA803075		0	No Homology to Known Proteins			TCATCTTCTTTTCCCGAGACCATAGTAGAACGTACAATCTTTATTTTCCCCTGAAAATTGAATGGCATGTGATTCTTTCTATTTAACTCCTGTTTGAATGCATCCTTGTAGCAAACCTTTCCTTGATGTTACATCCAAAATTGTGAGCAAAACCTTCTTTTAGCCCTTGAAGAATATACTTATTATTATCAATGGAAGTTGTTCGTCATTTGCATGGAGAAA
GmaAffx.4331.1.A1_at	BG551366		0	No Homology to Known Proteins			TGTGGCGATTCAAAACTGTTACTAAGTGATTTTAAACCGTTACAAAATACAGATTACTAAAAATGAATTGAGGACCAAATTATACTTCAATAATAAATTACAAGACCAAAAAGTTATTCAATTTTCTCTGAAAGTTATGCGCTTTTTGGTCCCCAACACATTCTTTCATTTATTTGCAGGGGTGGAAAACATGGTAGAGGGGGCAAATACTCCAGGTCCAGAGAGAATGAATCTGCAGTAGATCGCCCAAACAAAGTTAGAAAGTCATAGTTAATGGTTATAGATAACTTAAGAGATCNGTTTTTTNTGGTTCTGAGAGATATATGATAACTTAAGAGATCAGTTTTTGATCTGTTTATAGCTCTGCATCAAGAGTTGCATGATGTAGTTCGCAGCAAC…
GmaAffx.43949.1.S1_at	AW569516		0	No Homology to Known Proteins			GTATTCGATTGACCCACTTTTAGAAAGTCCGTCTTTCTCCTCTTCATCAGAAACCAGGTGAAACAATGATGACTTTGATCCCATGAACATATTTCAGCTTGAGATTTGGAACTGGGAATGACTTAATTTTTACTTTTGCATACATGCATTCATGTATGCATTCAAA
GmaAffx.4533.1.S1_at	BI317538		0	No Homology to Known Proteins			AAAATTGGTCTTTATATATTGTACAATTTTTTCCAGAGGGTCTAAATGCATGAGTAGGTTTGTTTGAGAGAAGTTATTTTAGCTCTAAATTTGTATATCTGTTGGTGCATCTTTATTTTTAATAGCAAATTTCATGGTTTGTAATTATTGTATATTCGTT
GmaAffx.4631.1.S1_at	BI427495		0	No Homology to Known Proteins			AATACAGTTCATGTTACCGACGATATGTAGTCAACTAAGTCATGTTTATTTTTGTGTTGTGAAGCATTTGGTGTCCTCTACGGACTTAGAGGTCTTGTAATACGGCTCTTTCGCATAGAACGAGTTTTTTTCTTTCTTTCTCAAACACGTGCCGAATTCTGTTCAGTTCATACTCTTTATACATTCCTTGGAGTGTT
GmaAffx.46481.1.S1_at	BM528129		0	No Homology to Known Proteins			AATTGGATATCATTTGTCAGTTCAGAACAGTACATTGAGGACAGTGAAAAGTAGAAGCAGATTTTAGGATTCTTGATCCTAGGTGTTTGCTCCAGACCTCATTAGTCAAAGGCATGTAAAAGTTTGAATTGACATTAATGGTGATATTTCCTAGGAATATAATTTTTATTTGAAGGATCAAATTAGTTTAATACTTGTACTGAAATATATAGATATTATTTTGTTTATCATGATAGCTGTCTTTTTACTAGAATTGCAGCGTGTTTTGAAATTTTTGGTATACCTTCGATTATTTCCTAAAAAATCCTTAAAAATGTTCGATAGTG
GmaAffx.46992.1.S1_at	BU083062		0	No Homology to Known Proteins			TAGTGTATTCAAACTTTTTTCTAGATACAAAAAACAACCTTTTTGTTTTTTCACATTTACCAATAATTCAGTTTGCCTCTCATAGTTTGTTTTATTTATATTTTTCCGTCGGCTTTCGCAATTGTAATACTAGTATCCTATATAAAATTGTAGCCTTATTCTATGCCTTTATAAAA
GmaAffx.47108.1.S1_at	BF010253		0	No Homology to Known Proteins			GTATTGTACCATTAGTTTCTACACAATGCAATTTTTAACTGATTTGTGGAATCTTGCTTTGTTCTTTTGTTTTTTGTTGTTTCGTTACTAAATCGTCGTAGATTTTGCTTTCATTGACATATATAATGTATTACTGGCAATGAAAGTTGAAAGTTGANACTATGGGACAGAATTGACACCTAGTCAATCTAGTGAAAT
GmaAffx.4882.1.A1_at	BE820482		0	No Homology to Known Proteins			TGGAGCTACCAAGGCCAGTTATTGGTTCTCTCTCTGACTATAGNCTATTTATTGTCCTANGAAGTTATTTCTGGTTTCATCCCTTGTGNACTTTTTCAGATACTAATGTTNCANCGNNTNTTTTTNCATAACCCTTNGTCGTGGAACTANATNGTNAAAATTGCAGTATTTAGTGTANANNANANNCCAGTNNNGGTATTTCTTAGCGTGCAGGATACCATGGGAAGCATTTATCAGATA
GmaAffx.50095.2.A1_s_at	CD417493		0	No Homology to Known Proteins			TACGCACGTTTCTGTTAGGGTTCAGGATTATTACAGTATTAGTATTCTTTTTTTTACCGGTGTAGTGAAATACATTACTGGAGAAGAATAGTGAGAGGAGCATATATATCTATATGTTACTACAGCTTTATTAAAAGAAAAACTCTAGATTGCTTTTGCTTTTCCAATTTATGTTGTCGGTTATGGATACCAAAAAAAAAGGAGGAATGGGATTGTTTGTGGTTGTGGGTTGCGAGATTACATGTGATGATTCCGCTGCAATCTACCGACACTA
GmaAffx.50600.1.S1_at	BI945714		0	No Homology to Known Proteins			CCATGTGGAAAATTTCTCTGGATATTGTATGATATCTGTATCTTGGCAGTTGGGCGACTNNNNNANNNCNTNNNNNNNNNNNNNNNANGCTTAGTTTCAACAACTAAAGAAAGTGACCATATTTCTTAAGTTGTAAATATCGAACCATTAGCAATGTGATGGACTTTATCTGATGGCTGCATTCTCTTCAACCGTTTCATTTCACATTTTGAATGAGATTTTATATGTAACCCAATAATATTGGATGGAAATATGCTGATTCAGA
GmaAffx.50791.1.S1_at	BM092484		0	No Homology to Known Proteins			ACTGCTCCCAAAGTTGAGACTGAACAAGAAACAAAACTTATCTGCTGATTTTAGAATATAATATTGAATTCCTAAAGATTTTGCAGTGTATAGAATGAATATTTTCATATTCTGAAAAATAGGATTATGATTTTATTGAAGCATTAGATGCTAAGAAAAAAAAAGTACCTCCTACACATGTATGTTTGTAAAAAAAATTGTCGTTATCACTTTCTTAGTCATTCAATGAGCAGCATCACAATATTTTCAATT
GmaAffx.52033.1.S1_s_at	BI945149		0	No Homology to Known Proteins			AAGAATATTGCTTAGTGCTCCTGTTAGTTGTGGCATTTTCTTTTGTTCCTATAGTTCTATATGAATAGTTGGCCCATAGGCCGTGATGTTTGTCAATTGA
GmaAffx.52057.1.S1_at	CA819136		0	No Homology to Known Proteins			CTACTTTGCAGGCTATACCTACCAATGTCTCTTTCTGGGTACCGCACGTTGAATTTCACTACGGATTCATTTCATCTCCCCTTATTTTATAATACTTCTTTTCTACGGAAAGTCATTGCTGCTCTACAATCTTCTTAGCTCTAAGCTTGATTGGAACGTATATGTTTGTTGATCAATAATTTAAGACACGACTCTTTGCAAGTTATAT
GmaAffx.52493.1.A1_at	AI856188		0	No Homology to Known Proteins			AAGATGTGCATCCTGGTGGGCAACCTTCACATTTTTTGTGTGTTTGTGTTCATTAAAATTCAGCAAACCACTTCTCCAACCACAAGGACCCAATTCACTATGGCTTGCCATATTAGGAATGTTCAGTTTTACTGTGTTTGTATCTGCTGCTTCTGTTATGGTTGTTGTTGAAGCACAGTTCACTCGTATGCAGATAACTGTTATGCTCAGTGCCTTCTTGGCTCTGCTGTTAGCTTAATTAGACAGTTTTCATATGTGTACTTATGTTTCCTTTAGCCATGGCGGAAAAAGTTGTTGTAATCTTTTTATTTACATAATTTCATTCGCATAACAATAAAACGATGTTTGGGTATGTGCTAT
GmaAffx.5251.1.S1_at	BM520587		0	No Homology to Known Proteins			AAGCGAATATGCGTGGAGCGAAATAGGAAGATTCTTGCGTAAGCAGCATCTTCCTCTCTCTTATTCTATTCCCTTATTTTCCCTTTTTGTTTCTTATTTCTCAAAATTCAAATATTCTGAAATCAACCACAACCTTCTCCTATATATAATACACACTTCTGCATTGCTATTCCTTCTCAGCATTCTCCTTAGCCTCAGGTTCTCTCTCTCTCTCTCTCTCTCTCTTAGTTCTCACAATTCACAAAACACAGGTTGTGAACTTTTATTTTCTTCTTCTTTGTGGTTGTTTGTTAGTTGAGGCCTCTTCATGTTTTTGCGGTTGCTGG
GmaAffx.52666.1.S1_at	BI945580		0	No Homology to Known Proteins			TCTCTATTCTTCTGCCTCTAGATAGTTAAAATTAGGTTTCCGGTTAAGTTCTTGCGAAATTTCTATAGCATACAAAAGCAAAGAGAAACTTTGTATCGAAAAGTGCAACTTTATTGACAATACTACATCGGCCTTGTCATTTTCG
GmaAffx.53189.1.S1_at	AW705544		0	No Homology to Known Proteins			GCATCTGCGCATACTTTGCATGGATTTCAGTTTACTTTGTTAGGCCTGCTTAGAGATTTTTCTCCTTGGTTGAATATGAAACCTGAAAGACTTGTAAATTGAACGAGCATCCAGAGCTGGTACCATGCTTAGGTATGATGACTCTTTTAGAACATTATTGCAACATTTCCATTACTTGCGATATACAATGATTTACTTCACCCTGTTCATGGAAATGGTTTTACTCCAAGTGTTAGCAAACATTCCCAAATTTT
GmaAffx.53445.1.S1_at	BE058743		0	No Homology to Known Proteins			AGTATGCTGATTTCCATGACATTTAAAAGCATTTTATTGACAAGCGGATTATGAGTTGTCATCTGCCCCACCACAAAAGATCTTTTTGTAGAAAGGAACTAATTGTTGTGCCAGCAGAGAACCTTATTTTGTTATGTTATAAGAATATTGTTCTGTTCCCTGTCCCTCCCCTTCTATTATATGCTTTACTGGGATGGGGAATGTTGCAGAGTAATGAATGTTGTTTAGCTTTATATGTTCCTCCATTATGTTTATTCAAGGTTTTATATTTTGTCTCTGCATGCTGCGTGCTTAATTCAACTAATATTCAATCAGGTATGTTGCTGAGGTTTTTCA
GmaAffx.54085.2.S1_at	BQ629483		0	No Homology to Known Proteins			AAGGAGGCAGGAATTGCATGTGCTTGGTAACCAAAACCAAACAAAGCCTTAAGANGTTCANTTTTGGGATGATGNGTTNTTCTCNNAGACANCANCAAAATCCAAAACTGTTNNTTTTTTTNCGTGATCTCTTNACTTTTCTGAACGCCACACAGATCCAANNNNNNTGGCAGAGCTGCTACTAATCACATGCATCTCACTACTTTTCCTCATTCAATA
GmaAffx.55247.3.S1_at	BM092796		0	No Homology to Known Proteins			GAAGACTTCTGTAGGTTTCTCACTTGTTGATGTCATTTGTTTTTTCTGTAATTGATGTCTTCCTCATCTCGGCGAAGCATTTTCACACATTTTTGTAAGCACTAATAGTGCAAGCTGTATTAACTCTTTCTTCTTTTGGAGTACTTTGTATATAGTATAAGTTCAAAACTTGTATAGGTTTTGTATTAGTGACTGGTATCGGATGCAGCATTTTAATTAGTTTAGAACTGGGTAAATTGGGCATCTGGTTATTAAGATGATAGGATATAGCCATTGTTGCTAATGATCTTGT
GmaAffx.55934.1.S1_at	BQ612922		0	No Homology to Known Proteins			GTTAAAATTTCACCATTCAAAGCCTTGATGATTCTTTCTTGATTAGATATTTGGAATGTGGCTGAATCAGATTTTGGCTAGCTGTATATCCGTTTTTTTTGTATGTAGTGGTAAATTGGTATGGAACAATATGACAATATCCGGTTTCCTTTT
GmaAffx.55940.1.S1_s_at	BQ627807		0	No Homology to Known Proteins			TTTTTGGATCTAATTCGTCATTTTCCAAAGTTTATGGTTCTCTTTTGTTGCCAAGTGTTGGCATAAACAATACACCGAGTACAATTGTCAATAATTGATATACTCGTTGAATTTTCCACTTATGGAAATCGAATATTGACTCTGG
GmaAffx.57734.1.S1_at	BG237680		0	No Homology to Known Proteins			AGCACGCTTGCGTTTTGGTGATTCGCTTGTGAAGAAGGTAATAGTAACGATGTATCATTCAGATCATTCTAAACACAAATACACAATGGAAGAATTTTATGGTTTATGATGTTATTGTTATTGTTATAGTTATGAATATCAAGATTTTACGTATGGTACGGCACAGAGAATTTTGTACCGGTAAT
GmaAffx.5944.1.S1_at	BU546557		0	No Homology to Known Proteins			AACAATAATGTTCCTCCGAGTTTAGGTCNTCCGAATGGGCAACATCTGAACCNTGAAGCTTATTCTTCTNCCTTGGGNNCATTCTCCTCATGCCAGACCTCCTTTCTAATTATTGAACGTGCTACATGGCAACAATTAATATATTATTATAGAAGGATCATATCATAATATTATGATATGAGTAAGTTAATTAATTAGCTCGAGACTTGATTTATATAATAATAATAATAATGATATGATATGCTATTAATCANANNNNATTTGTATATTTAATTTACTGCAACCGCTTCCGATCTGGTCTCACCTTAATAAGCAACCTGCACAGTGGCCATGGGCGTTGCTTCTTTCTGTAATTTCTTGAGTGACTTTTTAGTTTTCTATCACTCTAGCCATGTCTGC…
GmaAffx.60153.1.S1_at	BM523538		0	No Homology to Known Proteins			ATATATCTCTGTTTCTTCTATCTGGGAGTTGCTCTAGCAACAGTTTTTATTACTTTTTAATTAATATCCATCCTGATAACATTTCTCTTACAAACATCTCTGTGTGGACCATCTTAAAAATT
GmaAffx.60948.1.S1_at	BE058917		0	No Homology to Known Proteins			ATCATCATCACAAACATCGGCACCACCTGGATGATGAGAGAAATCACATGCAACAACACTCCCCTAAATTCAATGGAAAGCATGATGAGAAGTTAGACAAAACTGAAACCGATAAAAAGGATGGTGGTCATCATGAAAGTANAGCTATGGTCGAGAATAATGATGGTCAAATTGTTTGATTTTTGAGAATGAATCTGTTGTGGTNGTTCTGTACTGATTGGCAGCTGANNANNTGATATCCAAATTAAAGTTAAAGGAACAATTTCATTATTTATGTCGGATGTAANATTGTCGGCAGTTATTGTCTATGGAAACTTTGTTGGGTAATTGTTGGCTGTGAACATTAATTTGATCCTCATTCAACTA
GmaAffx.61669.1.S1_at	AI794709		0	No Homology to Known Proteins			ACAATGCTTTGATGTCTGTGAGCTCTTTTGTCGTAAAATGCTCGAGCGCAGATTCTATGGAGTACGATAACATCGAATTATTGGACTGTGGAAAGACGGAGAATTCCAATCATTGTAATATTGTTGCTCTTGTATGGAACCTTTTAAAACATGTACCACTTATTCGAT
GmaAffx.62848.1.S1_at	BE610709		0	No Homology to Known Proteins			GGAGAACCCGTAAGATATGACTCCAAGTAAAGAATGGTTCTGGTATCTTGAATCATGAAGACAGTTCAAATTTTGATTAAAAAAAATATATGAAGACCTTAGGTTGTTGATTACAAGTTGAGGACCTTTTAGTTTTATTAACTAGGCTTAACTATTGAGGTACAACACAATTTGGAGAAGTGGTTGATGTTGATGATTCGTTCTGAACATGAAGGATTGGATCACCAAACATGTATTTTGAATGTGGAATTTTGATATGGCTATTTTATATCTCTAGTTTTCTCAGTTTGCTCCTTTATGAAAGAGACCTTGAAGAACATGCCAGCCGTTTTAATT
GmaAffx.65043.1.A1_at	BI968224		0	No Homology to Known Proteins			GCATACACACTCTTCAATATTGAGAAGAAAAAAGTGTGAGACAATTCCGGTGAAATGTTGATGACTAGAGAGTTGGATCACACACTGTAATAGTATGGTATATATGTCAGTTGACTCTGTTGTCCCTGGTCACCTCTTCCTCCCTTTGACCAATCTCAGCAAAATCAGTGACCAGCATTGAAGGTTCCCTAGCTTATCACAAGG
GmaAffx.6522.1.A1_at	CD394786		0	No Homology to Known Proteins			TGCCGTTTTGTTAACTTGCGTTTATACGATTGCGTCTTTGTTCGGTTTTGTGGTTGCAGGAAATAACCAAATTGGTT
GmaAffx.65393.1.S1_s_at	BU760770		0	No Homology to Known Proteins			GTTTACTAGTGTGATTGGATCTCCCGTTGAAAACTCAAAGCTATGCTTCTGTTGAATTCACTTTCGCCGAATAATAGGAGTATTTTGAATCTTTCTATGCA
GmaAffx.65892.1.A1_at	CD406505		0	No Homology to Known Proteins			AGATGAGGAGTCTCCACAACCACCTTCTAAGAAGAGGAAATGAGAATTATACTAGTATGAAAAAATTGTCATCTTCCTGCCTTTTGTAATGCTTTCTAGTTTTTAGTCAAATTTAGTTCTTAGGACAAGGATTTACCAGCTTGGACCTGTCACCCCATGCTTTTATTGTCTAATATCATAACTTATAAACATTAGTATATTCTCATGTTACGATGTTGTTAGCTTTGGAAGGCATTGTAGTCTGTGGCAAAAATGGTTCAGGTCATGGTACTCATTTCCTTTTTCGTTGGGCTTGTAAGTCTGCCA
GmaAffx.6609.1.A1_at	CD411809		0	No Homology to Known Proteins			GGGAAAATGCCAGTGACCTATAGTTGATTGTGTCGTTTGGATGATGATTGCTCCCAACATATATTCTAATATTTTTAACTTTCTATTTGTCTCATTATGTGCCTGGAATTTTGTACAATGGAAGTCCATTTTGTTAATCGACTTCCTGTTATATTTTACCTTAGTCAAATACTACTACA
GmaAffx.66492.1.A1_at	AW349357		0	No Homology to Known Proteins			GAATTATATATTTTACTGGTCACAAAACAATCAGCCAGTTGTCATGTACNNTGTGCCCTCTCTTCCACCGTTTAATTCTGTGCTTTTATAGAACATCTGAAAATGAATGATTATGGCATTGGTCTACTTCTCTAGGCTTGCAAACACGGTATCAATTTATCAAAGTTTTTACATCCAAATTTCTCTAATTTTATGTGGTATGCGGTATGCCACCTAAAGATCATTAAGTCAGTAATTTCGGCAGTGATTGTGTGTTT
GmaAffx.67025.1.S1_s_at	BE057871		0	No Homology to Known Proteins			CCTGTTCTTCTCATTCTATCTTTTACTTGTACATGATGTTCTAGTCATGTTAATTCACCTCATTAAATGTAATGTACTTGGTTGTGGATAGGGGGAAATTCTCCTTCCTGTTATTTAGTTTACTGTCACTGTAAATAATGTACCATT
GmaAffx.67375.1.A1_at	BE659769		0	No Homology to Known Proteins			TTTGTTGGCTGGATTTTTATGTTAGTGTTTCGTGTTCGTGTTCATGTTCAAACATTTGATAATGATATGCGCTGTTTTTGGTGCTGCTTTTGTTTTTACTCATGAATGCGTGTTCTATTTTG
GmaAffx.70174.1.S1_at	AW733896		0	No Homology to Known Proteins			GGAATCACGAGGCTTGTAATATTGTTTAGGATTTTTCGCTAGTGCTTCTTTTGGATTGAGGTTCTCCATGTTAGTGGCAAATTGTATGTGACGNNNANGCAGANTCCCTNCTTTTTTNCTCNNATCTNNNTNNGNNNNNNNNNNNCNNANNNAGATNNGACGACAGAAGTGGCAAGTTGGATTGTATTTTTCNTCATCCCAAATTCAAATGAAAGTTCAGAAAGTTTGATGTTTC
GmaAffx.70298.1.S1_at	BI698911		0	No Homology to Known Proteins			ATTATTTTTCTCTTGTGCATATAGTTATAACTCTGTACCAATAATAAAGGTAATATTCTTGCGTACTATGATTTCTTTTTAACATTTTAGTATATAAGTGCAGGTAGGGAGTGTCTTTCTTCCGCTAGGTACAATAATGAACTTGGAGAAATTGTTGTTTTGGCTCATTTTGATCACTGATGTATTATTTTTGTTCGCACTGAAAGCAACATATTTGTCA
GmaAffx.70527.1.A1_at	BE821968		0	No Homology to Known Proteins			AAATTACATGACTTTTAGTCTCGTGAAAAGAAGAAAAGGGAGACCNAAAAAGATGGAGGAAATCATCAAGGGAGATTTTAGGCTAAATAATATATCTGAANCTTTGGTATTAAACTATATGAAATGACNTTGTATGATCCANNAAATCGATCTCACCTAATGGGATAAGACTTTGTTGTTGTATCTGGTCAGTCTCACTAGTTGATGCATCTAATTCTTTGTTAGTTTTCTTTATGTTATAGGATTTTATTCTTAGCAACCAA
GmaAffx.72194.1.A1_at	BE823174		0	No Homology to Known Proteins			AAATGGCAACATTGACGTGGTCGCTACTGAGTCTTGAAACAATAGTTGCTTTCTTCTTGCTTTTGTTCTACATGAGGTTAATGAAACCATATTTTACTTTCTGTAGTCTGACACATTTACGTTTGGTTGAGATTATCTCGTCAAATGTAAACGTTCATTACAAATGCAGTTCCATTTATTGGACCCAATGAGCGTTATTTTTGAAATATTCTAGATTTTGATGTATTGAGTCCCGAGGTTTCAA
GmaAffx.731.1.A1_at	AI416901		0	No Homology to Known Proteins			TGGCTGCAGCTGTTTGCTAGAAACAGGGTTGCCAATAATTGACTTTGTTATTACATAATAGTAGAGAGGGGGTTGGTTGGCCTGAGGCATGATAAAACGTGGGTTTAAGCATGCACATTTGATTTTATTTTTTTTTCCCTTGAACTGAACCATTTTTACTACATAGGTTCCGTCTATCGAATCATAGGAAAAGCCAAACACATGTGCCCTCGAGATTATTTGTTATATTGTTATCAATCTTGTAATATACGGTGGCTTTTACTGTATGTATACCTTCAGTCCTTTAGTATGATGAGTATTATCAATTTATAATATAAGGCACTCATTTATTTTTGT
GmaAffx.73124.1.S1_at	BI471108		0	No Homology to Known Proteins			GTATATTTTGGGACAATTATTTCAAATTTCAAAACACACAACACAACACAGCCTGAGACAGACAACAAACAACTGATAACAACAACATGGTTAGGNGTTCATAAGGTGAGGTCTGAATGGCTGGGATTGATGATAATGTTGGCCTTACTGGTGATTGGGGTCTTGCTAGCCCAAGTCCAAGGACCTTTTTTTNCCAGAATGTTCGAANAAGATAGTGTGACAAGATCAATCTCAGAACATTCTGGAAGTGGTAGAAC
GmaAffx.74678.1.S1_at	BM522927		0	No Homology to Known Proteins			CACTTCCTAAGTCCAAAGCGAACCTCTTTTATTTTTATGGCTCAATAATGTGATCCATGAACCTTTGGAAACATAGCAGAACTGTGGTTGAAGCTTGTATTGGTTTCTTCTTGTTATATTTTTGGTGGTTTTAGACTCCCGTGCCTGTTATTGGCTCGCTATGGATAACTATTTGCAAACTTGTGTTTTGTTATTATG
GmaAffx.74827.1.S1_at	CA802422		0	No Homology to Known Proteins			GGTCCTGCTTGAAAACAACCCGATGAGTAGGACATGCTGCTGCCAGTGCAAGGCGATGACAGACTCTTTCACATGGCCTTTAATTTGCTCAAATTAAATGGAGCCATGCTCCCTGTAAAATTCAATGCTCTAGATTCTGTTGGCTTTACTATTGGCCAAATATGTTCTTTTCACACATGTTGG
GmaAffx.74897.1.S1_at	BE610894		0	No Homology to Known Proteins			ATGGTGGGAGTGGTGCACCCTCAACAATTCATCAAGTTGAAGCTTTTTCAGTTCTGATTCATCTGGGTCTCGCGATTGCTCGGTGCTGATTTAGTATTTTAGGGTTTCAAATTTAGAGAAGCCCCATAGAAGCTTTGTACTCTGTCTATGTTCTCTTTTGCAATGAAATGCTTCTGGGTGGCCTTGTAATTTCTTGTTTCGTGTTTTTGTGGTCTAAGTTCACTGCTTTGAACGTTTCCCCCAAATAGTGTACAATCGACAATTATCATGGCGTTGCTATAG
GmaAffx.75093.1.A1_s_at	CD407666		0	No Homology to Known Proteins			TTCTATCATTTGTGGCTATTTATTGTGCCTGCAGATTTATCTGTCATAAAGTAGGTAAATATCTGACATGGTGAAATATTTAGAGTTTTTAGTTCTAGTCTCAAGGATCTTAAATAATTTTAAACTTGCAAGCTTGTGGAGAAAAGGTAGCTTGTTATAGTTGTATTTATTGTTTTTACATTAGAGACCATACCTTCAAGTCGGATGTTAATTACATTCCTAGCAATCGAATATTGTCC
GmaAffx.75481.3.S1_at	BU091049		0	No Homology to Known Proteins			TAGTTTTGGGTGTTGCTCCCATACACCATCAACCGCGGACTTGTCCCCAAGGG
GmaAffx.75881.1.S1_at	AW598783		0	No Homology to Known Proteins			GACTGTCTTTTTTAAAGATCATCTTGTAGTTGTAACATTAAATAGTAAGTTGCACTGTTGAGTTACCTATCCACACATTATGATTCACAAGGTCTTATGAATGCTAGTTTTGCGAGTTTGTATTCCACATGACTAAAA
GmaAffx.76231.2.S1_at	BI942390		0	No Homology to Known Proteins			AAATAAGATCTTCCAACCGCACCCATATTAGGACATGTAGGCAGTATCGNNNNGNGGTGAAAACAAGTAAAGAGGCACTTCCAGCACCGGGCAGGTGTCAGACTCTAAACATTGTGTTACCACTTAGCAGAGTCCTGTGTTTTTAATAAACAGTCGCTACCCCCTGAGAATCAAACACCCAGCTCATGATAGAATAAAGAGACAAAGCCATGGGTCTCCAGCAATGCTGCCGTGTCATGCAAACCCTGCAGCATCAACATATGTTCTGTTGATCACAGGAAATAGCTGAGACATTGATAGCTTCCAGTTGTTTTTACTCCTGAC
GmaAffx.76350.1.A1_s_at	BE555004		0	No Homology to Known Proteins			GTATAGCATGCTTTGAAATTCATCACTTTCGGTCATGTATATCGACAGATCTCTCATTCATGTCTTGACATAGTTCTGTAATTTTTACTCCATTGAGGGAAGCATCTTAAGAAATGTGTTGGATCGTTGATACCCATGAGAAAGTGGGTGACTGAATGTATACTTGAG
GmaAffx.76839.1.S1_at	BF426187		0	No Homology to Known Proteins			AGGTCTTTCTCCGAATTGCATCACGATTCTGTCATATAGTGCCAAATCAAACTGTTAATTTTAAATATATTTTTTATTTTTGAATCTCTCTTTATGTGGGCTTTGATGCACACCTCAAGGAGTGTTGCCCACGGGCAGA
GmaAffx.77071.1.S1_at	BG156945		0	No Homology to Known Proteins			AGTGCCGTGGATATAATTGATGCCCAATTTTATACTTGTATGATTCTGCAACTTTATTTTTTTTGCTTAATAATTTTTCAGATGTGCAGATGAACATGTACCTGAGTTAGTGAATTCTGATCCTTAGTCAATCTTACATAATCTAAATTTGGTTAGGGTTTATCATCGTTAATTCGATTTTTAATTGGGTCTTTTGTCATTGAGGGTTTCTGGGTCACAGTGAGTGGATGTTAAGGTTTAGATTTCAACCTGGCTGGGTCTGTGTTGTTTTCTAAAAGGTTTAAGGTTGAAGCTTTTTCGTGCTGCTTTTGATGAA
GmaAffx.77086.1.S1_at	BG237036		0	No Homology to Known Proteins			TATTTTTAATTGTTCCAATCCTGGAAAAAGAGACTTAGGCACCCAATACGAGAGTCTTCTATGAATAAGAACCTAAGAGAAAATTACCCTTAACCCAAACTAGAAACACCTATTTTAGCATGTCTTCCACGATTCATTCACAAACAAAAAGATGTGTAAAATCATACACAAAAACCCAGAGTAAAGATAGACACAACCTGATCCATCCTTTATGCAAAACCTTGCTTGACTGAAGAAGTGTTCTTGTTATCTCGAGAAAGTGACACAACTCACTTATCACAAAAG
GmaAffx.77267.1.S1_at	BG551392		0	No Homology to Known Proteins			GAAAAATTTGCATCTTCATTAGCTTTGNGAAACTCTAGNGATAATGTTTACTTAAAACTGAACATGGACACTGCATAGATGGATGCAAGACCATTTACTTTGTGTTTCTGCTAGTGTCTAGCTGTTGATTAGACTTGGATCCCAAG
GmaAffx.77770.1.S1_x_at	AW119465		0	No Homology to Known Proteins			GTAGAGAGCTAGTTCAGGTTTTTCCTCGTTCATTTCAGGTGATTGCTTCATTTGTATCCGTAGTTGTATTCAGTATTTATACTTATTTATTCACAAT
GmaAffx.78069.1.S1_at	BM271106		0	No Homology to Known Proteins			ATTGTGTATATTTAACTGAATTCAGTTGGCACTTGTTATATGGGCTCTCCCCTTTTAGGGGTTTATGGCCTTCTCTTCGTGTTAGTGTTAGTGTCATTGTGTGAATACTTAATACATTAATTGAATGCTTATATTTGTCTTTTCACTNNNNNNNNNNNNNNNNNNNNNNNNNNNNNNNNNNNNNNNNNNNNNNNNNNNNNNNNNNNNNNNNNNNNNNNNNNNATTTCAGTATTTTACACATGGTTAATCTCTGAATGGTTGATTGAAAATGTCTTGTGAGGTTTGGTTT
GmaAffx.78465.1.S1_s_at	BQ081690		0	No Homology to Known Proteins			GTTATGCTTGGCTTAAAGATTTGTTTATTTAAAGGTGTGACTTTGGCTTAGGAGACTAGAAGAGAAAATAGATGAGGCATGCTTAATAGTTTGTTTAGTAATTTGTAATGCCTGTATTCATTTATGG
GmaAffx.78636.1.S1_at	BQ627652		0	No Homology to Known Proteins			GGTGGCTGCTAAGTGCATGGAATATGAGACAATTAATTAAACCTGCAGCATGCATGTGTTGGAGTTCCCTTTCTCAAGGTAGAAATAATAANTCTAGTGGAGATGTAAACTACCATATTTTTAAGTTTGGTGGGTCAGCATAATAGTGATAATACTTCCCTTACTTTTGCTTCTTAGTAATTTACTAGAACGTGGGTTTCTCGGATGTATTTGATGANATATGAGAGCGGTGAATGGTGTATTTTTTAT
GmaAffx.78938.1.A1_at	BU550637		0	No Homology to Known Proteins			TGTTTAAGGCTATTTTACTGTTTTGGATAATTTAGATGATGGTTTCGAGAGGTATTATTATGGGCTGATTAGTTTATTTCTCTGCTCACAGTATGATATGTTTTTTGATATAATTTTGCCAATGGATTTTTAGCTTATTATGCGCATATATGTTAGCCCCTTTTATTGCCATGTGAGTTTTTTGCTAGTTAAGTTGGGATTGTCATCACACTCCTG
GmaAffx.79590.1.A1_s_at	BQ299283		0	No Homology to Known Proteins			GAAGCCCAAAAAAGTGTCACCATCTTCTTCTTCTTCTTATTCATCAGAAGAAAATAAACAAGATCATGTTTTGGTTCCTAAGTCTTATGTTGATCACATGAGAGCAAGATTTGGGAGCTTCAAGTCTAGGAGCCTCTCGGATCTGAAAGAACATGATGAGGAACAAGAACAAGAAGATGATGATGATGATGCGTGATGTTTTGGATTATTTAATAATGTGGTTTCGGTGTAAATAAACTAAATATTATAGTGCCCATTTTTAATTTAGCTAGCTTAATGGATTTTGTAT
GmaAffx.80368.1.S1_at	BE661831		0	No Homology to Known Proteins			ACAATTCATGAAACACGCTCTCTTCTTTCCCATCNTCACTATTTCTGATTCTCTCTCTCCCTTGGTCTAGTCTTCCTTTGTTATGCCTTGCCCTTTCCTTCGGGCAAAGTGGTGTTTCCATGTTGTTTCTGAGTTTACTTCCTCAATATCCCAGGNNNNNNNATATGTGTGTGTTCTTATGAAGGTTGCAGTGCTAAGGAGTCTATAGATTTTATGCTGCAGCTTCATTAGATACCAATTTTGGTGAATTTTTCTTGATAACTTGTTCTTGGATTTTTGTTTTGTGGTGTTGATGAAGATGGCTATGGGTGGCCTAATTTCCGGTGCTGGTGTTATTATT
GmaAffx.81750.1.S1_at	AW306336		0	No Homology to Known Proteins			GAAAATGCCATGGATCCTAGAATTGGAAAATTGCAAGGTGANCAAAGGTTCAACATGAACAACANNNNNNACAATAGTCCTTATTATGGTGATGGCTGCNNNANGGCTTCTACTCCNGCCACATATGATTTANCAGAGTTAGGTAACATTGCNGTNGNTGGCCACGTGTCNCTNGCATTGGAATTGAGGAACTGTGAAAGCNAAGGATTTGGTGTGTCNAATGATGACATGCATAAACGACNTAAGAAAACATTGGCTTCTTCCCCAGAGNCTGATTTGCTAGATTACCATTTCACAGACNCAGGAAAGCAACAAAACAANTTTGGCAATCCTCACCTATTGCACGAGTTTGTTGTGTGAANAANGNNNGNNTGGAGAATATTCTAATGTTTTTCAAGG…
GmaAffx.81891.1.S1_at	BG653859		0	No Homology to Known Proteins			CAAGAGGGATTTGCTATCGCTTTTCATTAGCGTACACATTATACATCTTAATGGCGCCATCATATTGTTCATCTAGCAATTTCCTGACAGGCCAAATAAATAACCTCAACATAA
GmaAffx.8301.1.A1_at	AW733669		0	No Homology to Known Proteins			ATAGGTTCAATTTGGTCCAAAATTGATTTTATATGCAACCAAATTGAACCCATTTTAAAAAAAGGGACCTAATTGAAGTACTTTTTTTTAAAAATTAAATGGCCTAATTAATTGAACATTTTAATAATAAGAGGACTAAGTTAAACATAAAAAATAAATTAGAGGACAAAAANNNNATTAAACCTAAATAGAATTAAGCCAAATAAATGAGTGAAATCTGTTTGATATTGTCCTATCCATATGAAGTNCCTGTGTATGTGCAGACTTGTTCATTTTACAAGCCTTTGTTAGGCTTAGGCATGGATATGTATTACTGGAAA
GmaAffx.84855.1.S1_at	AW459549		0	No Homology to Known Proteins			GTAACAAAGTGGTTTAGACATCAATAGAGGTGGTGCTTAATTATCANATGTTGCGGTGCATTTCTGTGTGCATCACCTCGTTACCTTTGACTTGTTTTGAGAGTACCATGAGAATC
GmaAffx.85270.1.S1_at	BE059241		0	No Homology to Known Proteins			GAGAAGTACCTATGTATTCATTATTGTGGAAATTTAGTATCAGAATGCGTACCTGGTGAGAAATTTTTTAAAATCATTTATCGTTAATTTTCTTTGATGAGTTCCTAGCTGCTAGAACCTGGATAGCTGGTCTCATCTTTGCAATGTTGGCCTTCCTCTTTGATGAGGTCCTTCTTCCTACGTGATGTTTTAGGGTGTGCATATTTATGAGCATTATTGCATATTAAATTGTATAGTTCTATCACGCAATGGTG
GmaAffx.85497.1.S1_at	BG508375		0	No Homology to Known Proteins			AATTATGATCCTAAGATTTTTACAAATAACGGGAAATCTGTTTGGCCATGCGACGATAACTTTTATCCTTGCTGTTAGGGACCTGCTTTGTCAAATCAAATTTGTTTTCAATTTGATAATCATCAATCAATCCCTTT
GmaAffx.87683.1.S1_at	BQ453720		0	No Homology to Known Proteins			GGAATATGCTGGTAACCTTCCATTCACCAGAGAACAAGTGCATGATTTGGAGTATGCCTTAAAAATTCAATCAAACGAAGAAACCATGTGAGTTATTTCTCTATCCTCATCTAAATCAGTGTTTCAGTTTTGGGAGCTGCACTTCGGCAAGGTCCCCTCCAAATTCCAAGGATATATATGCATGAAGGGCTACTTCGAAGCTTCATTTTGTTGAGCCATAAATTTTGATCATGCAATTTGTATGAATTATAACATGTTCTAGAGACCTATTTCTTTTCCA
GmaAffx.88676.1.A1_at	CD411430		0	No Homology to Known Proteins			AACTGTGTCTGATAAGGAAACTTCTGATAAGGAAGCTGCTGCAAAAGAAGTTGCAATAGAAGTTGAAGAGGAGCTAACTGACGAGGACTAATGGTTGCATTATGGCACTCCTTGAACTTGATAGCTATTATTCTAAGGGCCACATAATTACTTAACGACTAGGGTTGTAAATTTTGGAACATGTTTTAGTTGGAGTTAAAAACTGTTGAAATCCATGCGCAATATCTTTTCATTTTTTGTAATGCTCTCTTGTGATGTTCGTGAATGGTAGTCACATTGTTTTNTACAAGAGGCTTGTTGGTCNTCTTNTAGGATTNATTATTGCTTGCANANGTTTGAGCCTTTGAGGCNATTGGTAAANANNNNNNTNNNNANAGCGATATTCATTGGATTGACATG…
GmaAffx.89191.1.S1_at	CK606438		0	No Homology to Known Proteins			AGCATTGTTTTCAGCTAAGAACATAAGACGAAATAAAATCCAACAAAATGTATCAAAACATCAAAAAGGAGAGACCAGTGCCACNAACAACTGGGTGTCCTATTTGACAACATAAGCAATTGTAAAAGCAACGGAAACAAACTAGGTTTAACGCACTACTTGGATCTCTGTCTCATCTTTCGGCGCTTCCTCTTCAGCCTCCTCATACGCTTCTTCTTCCACTTGGCCCTCATCGCGAAAAGAAAACAG
GmaAffx.89191.1.S1_x_at	CK606438		0	No Homology to Known Proteins			AGCATTGTTTTCAGCTAAGAACATAAGACGAAATAAAATCCAACAAAATGTATCAAAACATCAAAAAGGAGAGACCAGTGCCACNAACAACTGGGTGTCCTATTTGACAACATAAGCAATTGTAAAAGCAACGGAAACAAACTAGGTTTAACGCACTACTTGGATCTCTGTCTCATCTTTCGGCGCTTCCTCTTCAGCCTCCTCATACGCTTCTTCTTCCACTTGGCCCTCATCGCGAAAAGAAAACAG
GmaAffx.89360.1.S1_s_at	CK606320		0	No Homology to Known Proteins			GGACATGCAACTGTAGATTTTGTAAGTTCCCCTCGACCGTTTAAGACTTCCTTAGTATCCTAGAATGGGTCATTATATAAAGTTTTCATCTGTTATTGGGCTCTATGGTTGAAACTTCTGATGCAAGGATACTGTGCCACCCCAAAGTTTAATATACTGAATACTAGAATAGTTATAGCCACAAGCCTGGTCCGGGGATGGTAATGCTTCTTCGTTTCTTTTAACTAAAAAATAGCAGAGGCAACAAAGATCAGAGCGAATTTTTATAATTATTATTTATAGGCGCCAACACATCTTCAGTATTA
GmaAffx.89772.2.S1_at	CK605863		0	No Homology to Known Proteins			GACCTTTTATCTAATAAATGCATCCCTTCCAGANNTCGGGGTTTGTTGCACGTATTAGCTCTAGAATTACTACGGTTATCCGAGTAGTAGATACCNTCAAACAAACTATAACTGATTTAAT
GmaAffx.89772.2.S1_x_at	CK605863		0	No Homology to Known Proteins			GCCTGTGTTGACCTTTTATCTAATAAATGCATCCCTTCCAGANNTCGGGGTTTGTTGCACGTATTAGCTCTAGAATTACTACGGTTATCCGAGTAGTAGATACCNTCAAACAAACTATAACTGATTTAATGAGCCATTCGCAG
GmaAffx.89772.42.S1_x_at	CK606038		0	No Homology to Known Proteins			AGGGCAAGTCTGGTGCCAGCAGCCGCGGTAATTCCAGCTCCAATAGCGTATATTTAAGTTGTTGCAGTTAAAAAGCTCGTAGTTGGACCTTGGGTTGGGTCGATCGGTCCGCCTCCGG
GmaAffx.89988.1.S1_at	CF805713		0	No Homology to Known Proteins			AAGGGATTCCCTATCACTTTTCTAGTCCAGTGTCTCCGGTCGATGTAATTTGTATAAATACGAGAATCGTCTCAACTAACGATACATCATTACATATCACCCATTGAGGACAGTAGACATCTTCAGATTTGTAACTTCCAACTCCAGTTAGCTATTAACCAGGAGATTAAAAATCTCTGCGTAATTACTACTCAAAGCACTCAGATGTTGCACTTATAAGATAACTAATTTACAAGGAAACAATTATCACACCTTTATATGCCACAGAAAATTACGAGTGGCAATAGTTGCATAATATAACTTGTGTCTATAATATCGAGTTGAAAAATTACATGTCAGGAAGAGCTGAAAGGGTTCACCGCATCCCTGCCTTCTGTACAATAATA
GmaAffx.8999.2.A1_s_at	BI700574		0	No Homology to Known Proteins			ATAATTAGATTGCAATTGTTTGTTCGTTTTATT
GmaAffx.90082.1.S1_s_at	CF805807		0	No Homology to Known Proteins			AACAGGAGGATTGCAGAAGTTGCTTGAGTGGAACTCGAGCTTGGTTGGATAATATATTCTTTTAAAGTTCAGACATCGTGTTTCCATTTTTCTTAAATTTGAGTATTTTGAATTTTTAGGAGGATGGTTTTGCTCGCATCCTCCTCTTGCTGAAAACTTTGTAGGTAGGAATGATATAATTTTGCATGCTAGGTTCTCTACATGCCATTGTCAAACGGGAATACTCATTTGTTTTCTTGT
GmaAffx.90095.1.S1_s_at	CF805820		0	No Homology to Known Proteins			AGATGCTAAGCTATATGAAAACATGCTTGCACGTAAAACAAAGGACCCATCTATGGCTATAAAGAGATTGAAGGTAGAGAAAGATCAGGGGGAAAATGAAGAGGTTGCAAGAATGGAAATTGACGAAGTTGCTGATAGCGCAGTGATTCAATAGTTGATTCTTGTTGAACATGTATAGATTATAATATAAAGCTTCTATTAACAAAATATGTAAACTAGTAGATGGAAGTTGCAAATTGGATTCGGATGAAAACCTACATGTTCCAATAGAGTACATTTATGTATTCCATCAACTTGTAATCTTGCCACA
GmaAffx.90222.1.S1_at	CF805947		0	No Homology to Known Proteins			GTTTCTAGGAAAATAGCAATCTGTTATTGAGCCAACCAGTTAGATTTGCTCTTAGTTGGTTGTTGCTGCAT
GmaAffx.91437.1.S1_s_at	CF807162		0	No Homology to Known Proteins			AAACCCCCTTTCAAATTTCATCATGTCCGGCTATCCCAACCAGCCTCCCAGCTACAGCTACGGCGCGCCGCCGCCGCCCCAACCCTACGGTGCCCATCCGCCATCGCAATCATACGGGGCTCCTCCGCCATCGCAATCATACGGGGCTCCTCCGCCACCGCAACCCTACGGCGCGCCGCCGCCCGCTCAGCCCTACTCCGCCTCCCCCTACGCCCAACCGTCCGCCCCCTACGCCGCCCCCTACAACAAACCCCCGAAGAACGAGTCCCACTCCCACGGCGGAGGAAGCAGCGGCGGCTACC
GmaAffx.91550.1.S1_at	CF807275		0	No Homology to Known Proteins			TTTGTTCTCTGCACTGAATAATACTGTACTGAATTTCTGAAACACGTGGTTAACCGGATATTGCCCAAAGATT
GmaAffx.91988.1.S1_at	CF807713		0	No Homology to Known Proteins			GGATGTATTTCATAACATTGAGACTGTTCCTATACCATTCTTTAGACTCATTAACTGCCATTATTATAGAGAATGTCTTATTGTTTC
GmaAffx.92374.1.S1_s_at	CF808099		0	No Homology to Known Proteins			ATTTGTAAGCAAGTTCATCAACTAGTATCATCCTTCTGAAATAGTTCTGTCGTGAAAGATGTAATCTCCTCTGAACTGGCAAGTTAATTGCTTATTTCTGCTTTTGTAGTCATCTGAGATTGTTTATTTTTAAAAAAATTCTTCTTCCCCCCTCCCCCCTTTTTTTATTGGAGGGGCGATGATTACCGAAGGTTGGCACAGTTGAAA
GmaAffx.92426.1.S1_at	CF808151		0	No Homology to Known Proteins			GAACAGTTGCAGAGTTTTTAACATTAATACATCCAACGTTCTCAACCAGAAAGTAAAAAATGTACATCCTCTTGCCCTTTTCCCCTTATTAAATAACACAACTTAAAACTTGGGGGGCAGTTTGGCCACAGACATTGACCGTAGTTCATCTCACAGTCGGCAACATTAAAATGGAAGGAAGGAATAACCTGATACATTTTCATATCCAAAAAATGGAAAATTTTGTTGTTTGGCATTGCCAAGAGTTCCTAAATT
GmaAffx.92825.1.S1_at	CF808550		0	No Homology to Known Proteins			TCCTTTTGTTTGCTTTCCCTTTCTGTCTTCATTAAATTAGTTTATCCC
GmaAffx.93481.1.S1_s_at	CF809206		0	No Homology to Known Proteins			GGTTTGCTTTAACATTATGATCATAAACTGAGATAATTTGTATGATCTCTCCCCTTTGGTTTAGATGCCTTTGCAGTCTTTGATGTATATGAAAGGCTTGGCCTCAGCTATTCTTTTTCCCC
GmaAffx.9618.1.S1_at	BM092432		0	No Homology to Known Proteins			ATCTGTGTCTCTTTTTATGGGACTAGTACTTTCTATGATCATGGTCGTGGTTTAGTTTAGTTTGCCTTTTAGTTGTTGAATTTGATTTCATACATACTATGTAAATTTGGAGTGTGGATCGAGTTTGTGACGGTGTTTGATTTGAGGATACTAGTAGCAAAAATAACCCCGCAAATTGTGGAAAAGTGAATAATACATTGTTGTTCACTTTTCGTTAAGAGTTTCTTGGCTGGCTC
Gma.16181.1.S1_at	CD409246	At2g28600	3e-70	Post-Transcription			GAAGGTGCTTAGTCATCAATTTTTTTATGTTCATTCCGTCTCTGCGGCTCATGATATCAAAAGATCAATTCCTTTTACTTTGGAATTTGGGCTGGGAGCTGAGTGGTAGGGATTGTAGGTTTCCTATGCTTGGAATTTGGAAACCTTCACGTTAAGAATCCCATTAAGAAATTTTTTGCAATATTATCTCTGCTTCTGTTTCAAGACTGTATTTTACTGTAATCGAATGAGCTTC
Gma.7605.1.A1_at	BU549002	At2g42520	6e-17	Post-Transcription			TACTCTTACCTTTCTAGTGTTTCAAGCCACAATATCATTTTGTACGGTTTACAATGCTAATCACCAAAGGNNNATGTGGGTGTGTATGTAGCATCATTTCCACATCAGTAAAGGTAGTGCAGTGTCAGTAGGTGTTGGCAATGGCGATTACTAACATATTAGGAGTTCTTTTTAACAACTTTCTGTACTCTTCATTTTGGGTGGTTATTTTGGTGGGAGAAAGGTTGTAGAATATGCGGTGGGAGAGGTGGAGGCATTTCTTTAAAGTCGGATCTTTTATCTCTTGATCATGTTTCTACCCAATGTATGTTGTCAT
Gma.7230.1.S1_at	BI970668	At1g61010	0	Post-Transcription			GTAAGAACAGCATTCCGGCGCATTCAAAGTTCTGTGAAGCCAATTCCTGTTTCTGCGCCATAGTTTTTCATTTCCTTACATTTTCTTTGGAAAAGGTGAAATGCCACCGATAAGGAACACCAGCTCACATGTCCCCGCTAACATGAGACAATTATCACAACATGTTACCTTCCCTTCCCTTTAACATGATGAGCTTTGTCACAGCATTCTCTGTTTCCTTTTGTTTATTCTTCAAATATTTGGTCATTTAATCTAAACTTATTTTCTTCAAANNNNANNNNNNNNNNNNNNNACNNNNTCTNNCTNNCGGTTTCTGCCTGATGGTGCGTATCTACAACACTATAGCCGTGTAGTTTTCTGTTTGTTTTGCTCCTTAGAGACTGGAGGCTGTTACCTTCA…
GmaAffx.30043.1.S1_at	AW099862	At2g21660	2e-29	Post-Transcription			TGGTGATGGTGGTTCTCGCTACTCTCGCGGTGGGGAAGGCGGTGGATCCGATGGAAACTGGAGAAATTAGGCATATGACCCTGTAAATTAGGGTTTATGATTAAGTTCAATTATTTTAAGGTGTTGTCTGTGTGTGGTTTAAGTTTCGGTATCTGTGTTGGTTTCGTTTCGTGTTCCTGTGGTTTTCGTTTTTGACCTACAATTCTAGTTGTGTTTATAGTCGATCGAATGAAATGATAGTAAGAAATTATCGCATCAAANNTNNANNNANNNNNCNNNNTGTTTGCTGGANNTGGAAATCGAATTGGATTAATGGTGATGGTTCTTAGTTTACCGGATTCGGTAAATTGTATACTCAAAACGATAAAAATCACTAATTTATTTTTTTAAAATTGGCAT…
GmaAffx.23435.1.S1_at	AW349191	At1g60650	4e-06	Post-Transcription			GTTCTCGTTCATCACTTGATCGCTACTGATTTCTACTGCTGATGTTTTTAACGGGAAATCCAAATGCAGAAGCCACATTAGAGACCTAGTTCTTGTTCTTGTTACGTAGGACATCCTGTTTGGGACAACTGCTACTGCTAGATTGTAGTTTCATAGATTGTGGATTTCATAGTTTGTTTCCTTATTTAGATCGTGCCAATCCCTGTT
Gma.11907.1.S1_at	CD401517	At3g04610	4e-35	Post-Transcription			ATTCCTCTTACATATGCAGATGCTGNTATAGGAGCATCNGGCACAAATATCAGCTATATACGTCGTGCTAGTGGAGCAAGTATTACAATTCAGGAAACAAGGGGTGTGCCAGGNGAGATGACTGTTGAGATAAGNGGGACTTCTTCTCAAATACAGGCAGCCCAGCAGCTGGTTCAGAATTTCATGGCTGAAGCTGCAAGTGCNACACAGGATCCTATGGGGGGATCAGTCAGCCAAGGTTACAGTGCCTATCCAACAACTGCTCCAGTTTATGCTCCNCCNNCNANNNCTNGNGNTGGTGGTCATACAGGCCATGCGCCTTCTGCAGATTATGGCCCCNTATATGGTACCAATTATGGGTATTAAGATGCTTCATTTAATTTTGGTCAAGGAGCTTTG…
Gma.18058.3.S1_at	CD392260	At4g25630	4e-19	Post-Transcription			AGTAGATTGCTTTCCGGTAGCCCGTAGGCTTAAATTTCATTTCAGGAGATTGTGTTAATTTTGTTTTGAAACCTCGGTTATCAAAACATACTTTGTACACTTTTCTATAGTAGTAATGTAGGATCAAGTTTGCACTTCCAAAAAA
GmaAffx.4900.1.S1_at	BI968956	At4g35785	2e-30	Post-Transcription			GCGAACCGTTGCATCAAATATCTCAATCAATCAGTTTTAGAGGGTCGCTATATTACTGTTGAGCGGTCACGAAGAAAGCGGCCAAGAACTCCTACACCTNGACACTNATCTTGNCNTTAAAAGNACTAGAGACTATGGGCATCGTGGTGACCATGGAAGGTATCGAGGAGGTGGATCTGGTCATGATGATTATGGATATCGTGGTGACCGTGGAAGGTCTCCAAGGCACTCACCACCATATCGAGGTGGTAGAGATTATTCACCGAGGCACTCACCCCCACCTTATGGTGGAAGATCTAGGAGGGACAGGTCCAGGTCACTTCCTTATTCTCCATATGGTAGCCCAGATAGGAGGTATGCTCGTGGATCTAGGTGATGTCTTTTAAGTTTGAAGATGGT…
Gma.7856.1.S1_at	BI971143	At1g43190	5e-07	Post-Transcription			TTTTTTCTCTTTGAATCATTTATCTTTTCATCTCCATTGCCTCTACTAGATATTTAGGTTTCTAACATAATATTGTGGGGCAAGCTTTATTATTGCAGATGGATGTAGTCTTAAAGAATAGAAAAAGGAGGAGGGAAGTTACTACCTTCTTCGGGGTTGAGGGATTGCCTTAGGGTTTTTTATAATGATTGTTGTATATTTTCTGTAATTCAGGCTAAGTAGGCCTTTTCTGTTGTATTCTCNATCCATTTCAATTTTCTTGTCCAACTAAGTA
Gma.10924.2.S1_at	CD409151	At3g62840	1e-54	Post-Transcription			TTCAACACTGGACCGCTGTCCGTACTCATGATGAGTGTTAAAAATAATACTCAGGTACTGATAAATTGTCGGAACAACAAAAAGCTTCTGGGTCGTGTAAGGGCTTTTGATAGGCACTGCAACATGGTTCTTGAAAATGTGAGGGAGATGTGGACTGAGGTGCCAAAAACTGGTAAAGGAAAGAAAAAGGCCCAGCCAGTCAACAAGGATAGATTCATCAGCAAGATGTTCCTCCGTGGAGATTCTGTCATCATTGTTCTTAGGAATCCCAAATGAGATTCTATCATCAATTATTCGCGTAGACATTAGCGGAGGATGTAGTTGGTCATTTGATGAGGACGCCCTGGATCTTTTATGTACCCATTAACGTGTACATCTAATGTTTTGTATGGATTAAAA…
Gma.5264.1.S1_at	BM093119	At5g04600	4e-73	Post-Transcription			AGACTGAGTGGGTAACCTGTCTCATCATCTTTAAAAGATGATTTTTCTGCATATCCTGAAAGGTACTAGAGAACTTAATCAAAGTGAGGTTGTTTTGTTACCTTTCTTCCCTTAGATGTGTTAGAGTAAAACTGCTACTGCTGTTTTAGGACTTAGTATTAGCATTTAACTATTGTCAAGCCTTTGCAATTTTGGGACTTAATTCTGAAACCTTGTGTTCTCAGAAATATTTTATAGAAGCATTATCCGTTTCTTAATATTTTTCCCAGGAGGGTAGATTGTTAAGA
Gma.6057.1.S1_at	BI968398	At1g05820	7e-28	Protein Destination & Storage			TATTTGGGACTATACCTGATGAACGGAAATGGACAACCTGCACTTCTCTACCTTGTTCCATGTACACTAGGTGTCACAGTCATACTGGGATGTATAAGAGGTGAGTTGGAGAGCCTTTGGAATTATGGCACAGACTCATCGTTGTCCACAGAGCCCCCTGGCTCTGAAGTTTAAATGATCACGTTATTCATCTTTTGAGGATTGAAGAAACTGAACTGCAACTTTGGGAAATGTTCTCAGCTCAGTGGTTAGGAAAGAAAGACACCAGGTGTACAGGCTCCGTAACTATCTTCTGTATTAATGCTTGAGTGCTCTTTATGGCTGCGTCATATTATACTACATTTCTCTTGTAAAAAGGATGAAAAGCAGATGGAAAAGTACGTATTCAAAATTCACCAT…
Gma.10552.1.S1_at	BG508092	At4g15420	1e-76	Protein Destination & Storage	Ubiquitin Degradation		GATCAGGCGTTCCAGCAGGTAGAATTAGAAAAGCACATGAAAGTTTTTCATGAGCCACTTCACTGCCCNTGTGGAATAATCCTCGAGAAAGAGCAAATGGTGGAGCATCAAGCTTCAGTTTGTCCCCTGCGTCTTATTACTTGCCNGTTTTGTGGTGATATGGTTCAAGCTGGGAGTTCTGCCATGGATGTCCGTGACAGATTAAGAGGATTGTCTGAACATGAGAGTATTTGCGGTTCTAGGACTGCCCCCTGTGATTCTTGTGGGCGTTCTGTGATGTTGAAGGACATGGACATTCACCAGGTTGCTGTTCATCAAAAAGGCTAATTCTGATATTTTCATCTTAACAGCAACTTGTGAAAGATTGCATCTAGGTAATAAATAGAAAATTAAAAGAAA…
Gma.17363.1.S1_at	AW471877	At1g35620	0.002	Protein Destination & Storage			TTGTGGTGGCAGTACTGATGCTAATTCAGACATTCAGTAAAGGAGGTGATGAATACCAGAGTGTACCCAATCAAGTTCAAACTGATCATGCAATCAGTTCTGTTTCTGAAGCNNNANNCNNNNNGTATAAACCTGGTGACAAGNAAGACTAAAAATTAACATAATACATTGATAATTAATGAACGTGGTCAGGAGTATTCTAGAAAGTAGCTGGCTTTAGAATTACCATACCTATTGGTATGAGTAAATATTTTGAGTTTGTGTATCTCCATAATTTTGAATACTGTTCAAACTCTTGCCTTTTGATTTACACCTTTCCACTAGTTATTTCTT
Gma.1605.1.S1_x_at	BI425139	At1g48900	0	Protein Destination & Storage			TATCCCGAAATATGAATGCCCAACACATGAGCAAAGTCCTNCCTCCTCAGATGCTGAAGCAAATNGGTGGCATGGGNGGGTTACAAANCTTGATGAAGCAGATGGGATCTGCCAAAGACATGATGGGAATGGGAGGAATGTTTGGTGNTGNTGGTGGTGNNNATTAGTTNATTGGCTTNTGAGCTGAGGATTNTTCCNGACCANAGNCACTGTCATTNNATTGTGNNNTTTTACNACTAGANTCGANTGAGCAGGTTATGCAGTTCAATNGGNGTTNGAGTGCCATCTGNAATAGCCGCAATGGGTGCAAGTGTCTCTTTTTGTAAAATTAAATNCTTNTTCCCTTTTTGTGTATATTTACTTATTTANTATTCAGAGNAATCAANNNNNNNAGTAATC…
GmaAffx.67038.1.S1_at	BE022668	At1g47710	1e-106	Protein Destination & Storage			ACTCTGCTGTGGGTCAAAACTTGTTTGTTTCCGATATATTTCATAAGTCTTTTATAGAAGTAAATGAAGAAGGCACTGAAGCTGCAGCGGCCACCGCTGCAACTATACAATTTGGGTGTGCGATGTTTCCAACTGAAATAGACTTTGTAGCTGACCACCCTTTCTTGTTCCTGATCAGAGAAGATTTAACTGGAACAGTACTCTTTATCGGACAGGTGTTGAATCCTCAGGCTGAATAATATTAACATTGGTAGCAAAACTTATGCTCCTATTCTGTTGTCTTGATTTACCTATGGTTGGATGATCCAAAATTTCTGGCAGTTTCACATGTGGCTTAAGAAGGTAAAAAGGTACATATGGATCACCGTTTTAAGTTTTGAACACTTACGAGTATGGCGT…
Gma.7767.1.S1_at	AI494936	At4g21660	2e-28	Protein Destination & Storage			AGAGAAGTTGCGTAGTCAGCGTGAAGATTTCAGTGACATGGTTGCAGAGAACGAGAAGAAGAGGAAAAGAAAGATGCAAGAAAAGGAGGGCAAGTCAAAGAAGAGAGACTTCAAGTTTTAGGGTGCGCCTAGTTCGTTTCTTTTGCTGGAAGATGGGGGGGCTGCTACCCTTTTCTACTGGGCAAGTTCTAACATTCCATGAGCCATGAGTTGAGAATTTGTTGTTAGCAGGGGTCTCAATTGATAAGAATATATAATTATATACGACTATATATAATACAATGAAGACTCCATGCAGAGAACGTGGTAGTCAAGCTTTAGTTGAAAATTCAATACGATGAATCCTACCAAGGCTTTACGGATTCTGGCCGACATGAATGCATGTTACTTAGAGGAA
Gma.7964.3.S1_at	BM177544	At5g24260	2e-63	Protein Destination & Storage			GAGTGAATGAGGCTACAGGTCTAATATATTTTACTGGGACCTTAGATGGTCCTCTGGAATCCAATTTGTATTGTGCCAAACTTTTTGTTGATGGAAATCAACCACTTCAGGCCCCTATCAGACTTACACACAGCAAGGGGAAGCACATTGTGGTCCTTGATCATCATATGCAAAGTTTTGTTGATATTCATGATTCCCTTGGTTGTCCTCCTAGGGTGTTATTGTGCTCATTGGAAGATGGAAGTGTAATCAAGCCTTTATATGAGCAGTCATTTACAATTCCAAGATTCAAAAAGCTTCAACTTGAGCCACCGGAGATTGTTGAAATACAGGCTAATGATGGCACTACAT
GmaAffx.83218.1.S1_at	BQ628574	At4g20070	9e-20	Protein Destination & Storage			TTGGTTTTAGTTATCCTGTTATCAGGAAACGGCTCCAAGTTGTTTATCATGTTCTTTGCCACTGTCAAATTAAA
Gma.6719.5.S1_at	AW598355	At3g25230	2e-80	Protein Destination & Storage			GTTCATAGAGTACGATACTGCCTTTAGNGAAGAGGAGAAGAAGAGCTCCAAANCCTTGAAGGTTGCCTGTAATNTAAACAATGCAGCATGCAAGTTNAAATTAAAAGATTANAAACAAGCAGAGAAATTGTGCACAAAGGTACTGGACCTTGAGAGTACTAATGTGAAGGCTCTCTATAGAAGGGCCCAGGCATATATCCAGTTGGCTGATTTAGACTTGGCCGAATTTGATATTAAGAAAGCGCTTGAGATTGACCCTAACAACAGGGATGTCAAGCTTGAGTACAAGACTTTGAAGGAAAAGATGAAGGAGTACAACAAAAAAGAGGCAAAATTTTATGGAAATATGTTCAACAAACTGCACAAGCTAGATTCTCTTGACAGTAATAAACCAGCGTC…
GmaAffx.28112.2.A1_at	BM093404	At5g67530	5e-08	Protein Destination & Storage			GCAAGTACTTAAAAGCTAGGAGCACTCAAGCTAAATCTGCTACTGTTGACAACACCGGTACAGACGTTGTAGTAAAGAAAAGAAAAGTGGGAGTTGCCAGCAGTGAATTTAAAGATTTTTCTGCATGGTAACAATCCCAATTTCGTACAATTTGTAAAAAAGTGTAAACTTTTCTTGTAGATTATTATAATTTGCATTGGGGAAATTGACGGGATAGTGAGGAAATTTTTTTGCACGCCATTCAGGATTTGTACGATACAGCGTATTATTGGATGAGA
GmaAffx.34785.25.A1_s_at	AW152939	At2g16600	7e-06	Protein Destination & Storage			TGGCCAGATTGTAGAGAAGTGAGTCTTGATACAACGATGTTTCGAGACATGTTTGTTGCTATTCAATGCAAATCACTAGTATTATAATAAGTGATTTGTGTAACTAGGAGTCAATTGTCCAGTATTAATGTAACTCTCAAATTTGTACTCCTAAATCTGCTTTTACATTTGTTCCANNNNAAAATGCGTAGCTGTCTGTAGTTGGTCAGAGATTACGTTGATAGAATTGTGGAAGCAATAGGCTCGAATATCTGTAGT
Gma.3378.1.S1_at	AI856352	At5g42390	1e-173	Protein Destination & Storage			GTTATCGTTCGAAGGATTAGCTGCATGTGTGACAACACAAGAAGTTGCTGCATTCATTTAAACATTCAACCCATTCGGAATACAAGCTGTTCGATCAAACCTGGGAAGCGGTTATTGACTTGCGTGTGATTGATTTCCTCAATTATCCTTATCTCCAGTTGAATCACTAATAAAATGCTGTTACTACCTATACTTTGTAGAATTAGAATAAAGAAAAAATGTAGAATCAATCACTAAGATGTAGATGTATGTATAGGTGCCATTTTTTGTCCCTCGGCCGTAAATTTTTTTCGGGGGAACTCCGACCGTATCTTAGCGTAGGAAGTTAGTTATATAAATTGTACATCATTGTTTCCGCGTATGTAAACCAAGTTTCTTCATCCCATCGAAACGGGA
Gma.15880.1.S1_at	BE823347	At2g30410	6e-46	Protein Destination & Storage			GAAGGAGCTGCATTCTTATGAGAAGGAAGTTGAGAGAGAAGCTGCCAAAACAGCTGATATGAAGGAAAAAGGAGCCGATCCCTATGATCTCAAGCAACAGGAAAATGTCTTGGCTGAGTCTAGGATGATGATTCCTGACTGCCGCAAGCGCCTTGAGGCCGCTTTGGCAGACTTGAAAGGATTATTGGCTGAGTTGGAGGAGTCGGATGAGAAGGCCAGTCCTGAGATTGATGAAGCTCGGAACACCATCGTAGAAGTTGAAAAAGTATTTGAAACAACAGAAGATTAACAAGGTTGTTTGATTAGTGCTCTTGATGGAGGATATTGGACCTGTATTGTACATTTTCCTGGTCACAAACAATCATACATTCTTCTTGTTCCATGTGCCCTCTCCTCCAC…
Gma.12475.1.S1_at	CD392558	At4g01000	8e-21	Protein Destination & Storage			AAATCAACTCCCCTGGATGAACTTCCAAAGAAGCTGNTTGCGAAGAAGTAAGGAGANTTTTGANANGGCAGTTNTTTCTCTGTACAGTATTTCNTAACTNTTTGCACCTTNTACNTGGGTGTCAGTTNTATCCTCTGATGACTTNNGGAACTNNGACTGATGCATGCCTTTTCTGTTCGTTTTAGTGTTCATATTGGGCTGTATTTTGATGTAATAAATACCGTTACCAGCNAGCCAAAGGAAGCTGAACACTGTATAACCCAAGAAT
GmaAffx.90621.1.S1_s_at	CF806346	At2g21270	1e-103	Protein Destination & Storage			GATATCATGGGACATCATTTGAGCAGATATATCGATGCTACCCAGCTTCCTTTATTGAAAAGCCCCAAATCGAAAGTGGTGACAAAATTATCATGCCTCCATCAGCCCTTGACCGTCTAGCATCTCTGCATATTGATTACCCAATGTTGTTTGAACTCCGTAATGATGCTGCCGAGCGGGTTTCTCATTGTGGGGTTCTGGAGTTCATTGCTGAGGAAGGCATGATATACATGCCATACTGGATGATGGAGAACATGCTTTTACAAGAGGGGGACATTGTCAAAGTGAAAAATGTGACACTTCCAAAGGGGACATATGTTAAGTTACAGCCCCACACAAAAGACTTTTTGGATATTTCCAATCCAAAAGCTATCTTAGAAACAACATTGAGGAATTTTT…
GmaAffx.91367.1.S1_s_at	CF806415	At5g53300	7e-79	Protein Destination & Storage			TTAAGTGACCTTGTGGTATGTTTGAGGGAGAGCCTTTCTACTCTCAGTGTTTAGGTCTCTCAGCCCTTGTAGGAATATTTGTCGTTTTAAATCATGATTAAGGCCCCTCC
GmaAffx.38539.1.A1_s_at	CD401728	At3g08690	2e-08	Protein Destination & Storage			AGTACGAGAGCACTGCCCGTTCTTGGACTCAGAAATACGCCATGAGCTAGAAGAAAATATCTTTATTGTTCTGGTGACAGCTTATGTGCGCAAAACAAGTTGTT
Gma.5246.1.S1_at	CD392681	At3g20060	3e-47	Protein Destination & Storage			GATAAAATTCCAAAGCGAGATCAATTAGTTTCCACGTCATAGTTGTAAACGTTTGCCTGAAGAAAAAGTCTGCACCTTATAAATGTCCTTTTTTTTTNCCTTGCTTTGATATTGTAACCTGAAACTACGAGAGTTCTAAGTCCTCTTAAAAGTCTTTTAATTACTTTCTGTATAGTAGTAAAAGTTTTCATTGCAAAATAGCCAAATGACGCAATGACATCTTTGTGATATTTTTTGCTTCGGATGCACGATGCTTACAACTGTATATTCAT
Gma.8301.3.S1_at	BI321023	At1g23260	6e-67	Protein Destination & Storage			CGGTCCCCCTAGTACTGTTCATGAAGGGCGTATCTACCAGTTGAAATTGTTTTGCAGCAGGGATTATCCAGACAATCCTCCATCTGTTAGATTTCAAACAAGGATTAACATGACATGTGTCAATCAAGAAACTGGAGTGGTTGAGCCACATTTGTTTCCTATGCTTGCTAATTGGAAACGTGAGCGTACAATGGAAGACATTTTGATTCAATTGAAGAGAGAAATGATGTCTCCCCAAAATAGGAAGCTAACTCAGCCTCCTGAAGGCAATGAAGAATCCAGGGTTGATCAAAAGGGGTTGGTGGTGAGATGTTGTATTGTGTAATTCCGTGGAGAATCCAAGAATAATAATAATGTAAATAACTATATTCAATAGACCACTTCCTCCCTGGAGCAATC…
GmaAffx.7291.1.S1_at	BE820892	At1g53020	2e-49	Protein Destination & Storage			GTGGCAATAGTTCTACGGCTAACGCCCAGAAAGAATTCGAGTCAGCTGTGAGTAGGATGATGAATACTNTGATTGCNTTTTTCACCAAGAATGGCTCCACAGANTGTGATGAGTTTCGATCTCCNGAGATTTATAGTNTGNCTGCTGTGGCTACTTCAAACTTAGAGNTTTACAAGATAGAGTCTGGTACAACAACANCAACANNNACATNNNTGACCCAGGTGTGAAGGTCCTAGNTTGTTTATGCTGATGATGAGAACANNTGTAGTGGGTGGTATATTTTTCTTATACTTNTTNGTGGTGATTTTTNATGTCCCACATGACATGACAANCCTCNTTGCTGNTTATATAACCCCTAGTTGAAAGATTTACATGCTAGTTCTAGCTCCTCGAAAGATG…
Gma.13248.1.S1_at	BM523367	At1g64230	1e-69	Protein Destination & Storage			GGAAGTATATGCCTTGACATTCTAAAAGAACAATGGAGCCCAGCACTAACCATTTCTAAGGTCCTTTTGTCCATTTGCTCANTGTTGACGGATCCCAACCCTGATGACCCGCTTGTGCCTGAAATTGCCCACATGTACAAGNCTGACANGGCTAAGTATGAAGCCACTGCTCGTAGCTGGACACAGAAGTATGCCATGGGATNATCATGCTCCTCCTTTAGCTGCNCANTNNANNTGNNNNATNNTNNTTTATGAAGAAACAANATNTACTTTTAATGAATGTTTTNTCTTTTTTTNGTCAGTGNAAATCAACCATGGTAAGGGAATTGATNNTNACTTNGTGAATATTTCTTTGCAAGACATCGGTCATGGNNNNNNNNAAGAAATTGTNNTANAATG…
GmaAffx.90199.1.A1_at	CF806975	At3g57870	1e-77	Protein Destination & Storage			TAGGGTTACATCAGCTAAATCTATAAACTATTTTTAGTATGGCAGATGTTTCTTCATTTGCTCCGTGTTAAAACTGTTTTATCATTGTGATTAATGGCTGCCATAACATTTAGACATGAT
Gma.5718.1.A1_s_at	BQ629764	At5g05080	2e-08	Protein Destination & Storage			GCTGTTAATGGTTCTTCTGCTGCTACAGTCATATCTGCTGCTTCTGCACCACCAAAGAAGGAAGGTGGACAAGCAAAAGCTCAGGCGGACAAGAAGAAGATAGATGCCAGAAAGAAAAGTTTGAAAAGATTGTAATAAAAATCTTCAATCATTGAAGTTTTTTATTTGTGTTTTAGTTTTACATTTTGATAGAGAAAGAGGGGAGGGAGTNGGGGATGTGGTCTCCTGGGNTCAACATTTGCNTTATAAAACGAGTGAGGTATTTTCTTTGGGAGTAAAT
Gma.5204.1.S1_at	BE022964	At1g73760	2e-59	Protein Destination & Storage			CAATTTTGGGATGATACATCAAAGCNNCAAGTAGATAAAGAGTGCAGCATTTGTCAGGAGGAGTATGAAGCNGGNNATGAGTTGGGGAGGCTAAATTGTGANCACANNTATCACTTTCAGTGTATAAAACAATGGGNTGCACAAAAAAATTTCTGCCCAGTATGTAAGCAACAAGTTGCGGCTCGACACTGAGTGACNCAACCCTNCTNNTNTTTNNNNNAGCTTCCATTCTCATCCATAAATTTGTGTATAGTTTTNCATATCCAATACAAGCAAGANTTTTCATTCTNTGCTGTCAATNATCATTTCATNTTTCAAAATTCCTGCATCCTCTGCGAGNANTCGGCAATTATATGTTATNGAGTAAAGGTTTATATTCGGGCTGAGACCTTTGCATAT…
Gma.5204.1.S1_x_at	BE022964	At1g73760	2e-59	Protein Destination & Storage			CAATTTTGGGATGATACATCAAAGCNNCAAGTAGATAAAGAGTGCAGCATTTGTCAGGAGGAGTATGAAGCNGGNNATGAGTTGGGGAGGCTAAATTGTGANCACANNTATCACTTTCAGTGTATAAAACAATGGGNTGCACAAAAAAATTTCTGCCCAGTATGTAAGCAACAAGTTGCGGCTCGACACTGAGTGACNCAACCCTNCTNNTNTTTNNNNNAGCTTCCATTCTCATCCATAAATTTGTGTATAGTTTTNCATATCCAATACAAGCAAGANTTTTCATTCTNTGCTGTCAATNATCATTTCATNTTTCAAAATTCCTGCATCCTCTGCGAGNANTCGGCAATTATATGTTATNGAGTAAAGGTTTATATTCGGGCTGAGACCTTTGCATAT…
Gma.1749.1.S1_at	BE824426	At2g04240	2e-31	Protein Destination & Storage	Ubiquitin Degradation		CTCTGTATGCCTCACTCAGTTTGAACCNGAATCNGAGATAAACCGCTTATCGTGCGGNCATCTCTTCCACAAAGTGTGCTTNGAGAAGTGGCTGGACTACTGGAACATTACATGCCCNCTTTGCNGGACTCCCTTGATGCCNGAAGATGACACACCTTGCTTTCAGTAAGCAAAANCAAGNGAGCATGNCAATAAGAGAGAGTTTCATGTACAGTGTAGTGTACATATTCTTGAGGGTTTTTGATGTTCATGCATCTGAGTTCTGCCACCTTTATAAGTTTTTAACCTTTTTCCTTTTATGGTCTGAGTTTGTGGAGGATTTTGTTTTTCCCTTTTTCTGTCTGTGCTNTTTAGCACACATGAGGGGTATACTTTTTGCTTGCATGNTATGTTTGTTCA…
Gma.12401.1.S1_at	AW349517	At3g60080	1e-17	Protein Destination & Storage	Ubiquitin Degradation	E3 Ubiquitin Ligase	AGAGAACGAGAATCGCGGCGCCCAGATTGGGGAAACTCAAGGTGGCGATTCGGCTTGCTGATCATATTGGTTCATAAGGTATATAGTGTATTAAAATAATGNTGAAGTTGTATCACCATAGATCGTCTTTTCAAGTGTAAATCTGCACCGACGATTATGCTGCTGTTCTTTTCCCTCCTTTTTTGGGAATCTCCAACTAGCTAGGTCTAGTGCTATAGCTAAAAAATACAATAAATTGATGGAGTGCACGGGTAATGTGCACTTCTCTACCCATCTTCCACTCTCTCTATGTTGGTCCTTGTAACTGGATTTCCTTAGCCAAATTTCTTGTGTAAAACTTAGCTTTCTTTTATGTTGTGTCTGAATTGCCCAAGTGGATGATGGATCCTTCCCACTGAA…
GmaAffx.48188.1.S1_at	BG508651	At3g56470	2e-41	Protein Destination & Storage			GAGCTGCAAACTTGGTCTGATCTCCCTACTGAACTCTTNGAATTAATNCTNTCCCGTTTAAGTCTAGATGATAATGTTCGNGCTTCGGTTGTTTGNAAGAGATGGCATTCTGTTGCCACTTCTGTATGTGTGGTAAACCAATCACCNTGGNTAATGTATTTTCCGAAATTTGGTGACTGGTATGAATTCTATGACCCNGNGCACCGCAAAACNTATTCCATNGAGTTGCCAGAGTTGAGTGGATCTAGAGTTTGTTACACCAAAGATGGTTGGTTACTNCTATACCGNCCCAGAACTCACCGNGTGTTCTTCTTCAATCCCTTTACTATGGAGATTATCAAGCTGCCAAGGTTTGAGATGTCATACCAAATAGTTGCCTTCTCTTGTGCTCCAACATCA…
Gma.6251.1.S1_at	BQ612457		0.006	Protein Destination & Storage			AAACAAAAGTTAGTGTATGCTTCAAAATGCAGAGATTAAAAGGTACCTAATAAAGAGTTCAATAGGCACGTACATGGCTCGTGCCTGCGGTGGACCATGATATATATGTCTGTACTTTTGTGCACTGCGTCACCTATGCTATCACTTTATTTGTAAGATCTG
GmaAffx.90785.1.S1_s_at	CF807476	At1g03220	3e-40	Protein Destination & Storage			GCGGCGGTGCCAACTATTGAGCTTGTGCTGCAGAACCAGAAGACGGTTTGGAGGATTTTTGGAGCGAACTCGATGGTTAGTGTGAGCGATGATAAGGTGCTATGCCTTGGGTTTGTGAATGGAGGTGAGAATCCGAGGACTTCGATAGTGATTGGAGGATATCAGCTGGAGGATAATCTTTTGCAGTTCGATTTGGCTACTTCAAGATTGGGATTCAGCTCTTTGCTCTATGGAAGCCGAACTACGTGTGCTAACTTCAACTTTACCTCCGCTGCGTAGAAGGAAAACGTTTCAATAATTAGCATTATCTCATTCTCTCATTCATAATAAATGCCGCCTGCGGAATTTAGGTTGAGCTTCGCAACTACGAGTTTCAAATAAACTGTTAAACACAAGTAT…
Gma.11179.1.S1_at	AW350100	At5g02500	0	Protein Destination & Storage			TGCTGGTGCAGCAGAGGATGAGTATGCTGCTCCTCCTTCTGGTGGAAGTGGTGCTGGCCCCAAGATTGAGGAAGTGGACTAAATGTAGTTGCTTTCCTCCAGATACCTGTTTTAAAAACTTATTTTACTTTATGCTTTTTTAATTGGATTTTAATCGCATGATTTTTGTTGGA
GmaAffx.60109.1.S1_at	BM520182	At5g15450	1e-45	Protein Destination & Storage			TACTGCCCCATAACTTTCCATCATACAAATTTTAGTATACAGTTTCCTTACACCAAT
GmaAffx.17961.2.S1_at	BG511562	At1g16030	1e-25	Protein Destination & Storage			CAAGCATGGGAGGTTGAGTCCTGAAGAGATGAGGAGAATGGTGAGAGATGCAGTGAGGTATAAGGCAGAGGATGAGGAGGTGAGNAACAAGGTGAGGNNNAANAACTTGCTTGAGAATTATGCNTTTGAAATGAGGGACAGAGTGAAGAACCTTGAGAAGGTTGTGGAGGAGACCATAGANTGGCTTGACAGAAACCAATTGGCTGAAACTGATGAGTTTGAGTACAAGAAGCAGGAGTTGGAAGAAAAGTTTCGGAAGTTTAGGTAATGGTAATTCTTGGTAGAACAAGTTTTAATGTTGAGTCCGAAGCAATGTAAAATAGTTCCAGCTTCTTTACTCAATCTAGTTGTCAGAGTGTGTATAACTGGTTTGTGCTTTATGTCTAAAATGTGAAAGTA…
Gma.11115.2.S1_s_at	BU764731	At3g12580	0	Protein Destination & Storage			TTGTTCTTGATTTTGTCAAAGACCCTTTTGAAGTTTAGATAACAGCGTGTCATTATGTTTTTATTGCGATTTTATTTTTCTCTT
Gma.17525.1.S1_at	BG839191	At5g56030	1e-150	Protein Destination & Storage			TGGATTTCTGGCGTTTTCTGAAATTCATGATAANNNNNNNNANNNNNTTGCTAACTTGAACATGATCACATCTTTAATCGTG
GmaAffx.3782.1.S1_at	CA935531	At2g04030	0	Protein Destination & Storage			GAGAGACTGATTTTTCCAATGATTTCATGGTGCTGAAGGAAGTTTCTAATATCATTATAGAACTGTGAGTGAATGTCCTAAGGGGCAAATCCTATGGGGCCTTTGCGAATGGAATTGAGTTTAGTGTTCGTAGGTGGGCAAATTTTTTATACTTCATGGTCTTGTGGCATTGTGTCATTCTTTTGGGTTTAAGATTTTCACGTGTTTGAGTACAAAT
Gma.5467.1.S1_at	BQ742865	At4g38600	1e-140	Protein Destination & Storage			TTCCTCCCTGCTTCTCAAATAATGGCCTCTCCCGGGTCACNNACATCAAAGGTGGTGACATGGTTCAGTTGAATCGGATCGCCTCGTTCTAAAGGTGTAAAGGAATTTGCGGAGCTCGTTTTAGCTGTTACAACATGTAAATAGAATAGGAATGTTGAGTAATTCCCTCCCCCCTCTAAATTTTCCATCATTCTGTTTTCAACTCAAATTATTGGCAGTTAGTTATTATACATGCATGGAAGATGGTAAAAGGAATANGAAATAATATCAAATACTATGCTTTATTATTTCATGTTAGATCTGTTACGAGCTTTTGTTGAGGTAAAANNNNNANATCACTCTATGCTGATGCTATTTGCTATGATTGCCCCAAAATGAGGCGCTCTATAGCATAAATAA…
GmaAffx.44465.1.S1_s_at	BI315902	At1g72610	2e-22	Protein Destination & Storage	Storage Protein		TGGCAGAGGCTAGGGTTTCTTATGAATCAACTCATACCTAGTGTTTGTTTTAGTGATAATCGTCAGCAATTAATAAACTTGTGCATTTGGGTGTGTTTT
Gma.8123.1.S1_at	AF243380.1	At2g02380	1e-73	Protein Destination & Storage			AATTGGTTTCGGGTGTATGTCTATAAAGCCTTATGTTTATTTTCCATTTCATATTCTTCCCAGAATCCCAGTCAATGTAGCTTGAT
Gma.449.1.S1_at	AF243379.1	At2g30860	5e-69	Protein Destination & Storage			CAACTTGTGTCTTCATGGTTTGTTTGGTTCACTATTTGGTGTGACTCCAGATCCCAAGGTGATTGAGGAGAGTGAAGCAAAGCTGGTACAAGTGTTGAACATCTATGAGGAGAGGCTCTCAAAGACTAAGTATTTGGCTGGGGATTTCTTCAGCATTGCTGATATTAGCCACCTTCCATTTCTTGATTATGTTGTGAACAATATGGGGAAAAAGTATTTGTTAGAGGAGAGGAAGCATGTGGGTGCCTGGTGGGATGACATTAGCAGTAGACCATCATGGAACAAGGTTCTCCAGCTCTACAGAGCTCCAATCTAGTTGCTAAATGAGTTTCAGGGAAACTGCTATTAGTGTATCATCTTTGAATATGTTAGTCAAGAATAAATGTACTTTTAGCAGAT…
GmaAffx.92767.1.S1_at	CF808492	At3g16480	4e-06	Protein Destination & Storage			GCATGTGATCCACCAGCTCATTATATTTTCTGGATCACAAGCATGCCTACTTCAAATTTTCGAGAGCAATATACACCGAATCAGCAATGCTGAAAATAAATCCCAGAGAAGTTTTTGTGCGGACCTGAGGAACCATTTATTCTGGTTCCATGTTTTTTTTAATTTTTTTTTATATAACGATTTGCCTTAGTGTATTAGGTGCATGGTCTCATGACTAATGCTCAC
Gma.1751.1.S1_at	BE473710	At3g02090	0	Protein Destination & Storage			GCTGTTGTCAGTGATGTAATTGGCATCCTTCGCAATTACTCATTCCTGTTGAAAATGGTGTTTACTTA
Gma.1751.2.S1_x_at	AI443536	At3g02090	1e-177	Protein Destination & Storage			AGATATTGGCCGTCAGTTACTCACATATGGTCGAAGAATCCCGTTTGCTGAATTGTTTGCTAGAATTGATGCTGTTGATGCCAGTACGATTAAACGTGTTGCCAATCGATTTATCTATGACAAGGATGTTGTTATTGCTGCCATGGGTCCTATTCAGCGTTTGCCTGATTACAACTGGTTCAGACGTAGAACCTACTGGAACCGTTACTAGTTCATTATAGTTTTTTTTTTTNNGCCTCATTTCAACTTCATGGGAGGTCTGGCATAATGTTTTATTCTAATTTACAACATTTATGCCTCTGTTTTTCATTTATTTGTTATGGGCCTCTATTTTGTAACAATTTTGCAGTAATAAGTATGCTGTTGTCAG
Gma.17631.1.S1_at	U08383.1	At5g42020	0	Protein Destination & Storage			AAGATCACCGATTACAAACGAAAAGGGACGTCTTAGCCAGGAAGAAATTGANAGAATGGTTCGNGAAGCAGAAGGAGTTTGCNGAGGAAGACAAGAAGGTGAAGGAGAGGATCGATGCTCGCAACAGTCTTGAAACCTATGTATACAACATGAAGAACCAGATCAGTGACAAGGACAAGCTCGCTGACAAGTTGGAGTCTGATGAAAAGGAGAAAATTGAGACTGCTGTGAAAGAAGCANTGGAATGGCTGGATGACAACCAGAGTNTGGAGAAAGAAGATTATGAAGAGAAGCTGAAGGAGGTTGAAGCCGTTTGCAACCCAATCATTAGTGCTGTGTATCAGAGATCTGGAGGAGCCCCAGGCGGTGGTGGTGCATCAGGCGAAGAAGACGAGGACG…
Gma.8434.1.S1_at	Z22872.1	At2g18340	3e-30	Protein Destination & Storage	Storage Protein		GGCTGGTCAATACAGTACAGAGAAGGCCAGAGAAATGAAGGATGCAGCAGCAGAGAAGGCTAGTGACATTGCAAAGGCTGCAAAGCAAAAATCACAAGAGCTGAAAGACAAATTAGGTGGACAACACCGGGATGCTGAGCTTTGAGAATTGAGACGGTTTTTAATCACTTTGTACCTTTTAATTATGCCACAATAGTTGTCCAATTCTGCCAGAAATAATATTGTGTGCGTATATATATAAGGGAGTGTCCGTCTTTGTGTTATGTACGGGGTGTGGTCTGATATATTAGCAACTACATAGTCGAGGTTGGAATATTTTGTATTGAATATGATGTTTTCTTTATGTATAGTTA
GmaAffx.90113.1.S1_at	CF806004	At1g52690	1e-22	Protein Destination & Storage	Storage Protein		ATGCTGCGTAAACCACTACTACAAGAAAGCACTTCAAATTATAGTATTAGTAATTTCTGCGGTTGTCTTGATCATGCTCGCCCAAGCCAAGGGTTTGCTTCACAGCCTCTGTAGCACCTTGGGCTGCGCCCTTCACCTTCTCCCCTGTCTGCTGCAGGAACCCTTGGGTGTTGTCCTTCCCTGACTGGGCCGATTCCTTCGTGGACTGGCCCATCTCTGAGGTCTTTTGTTGAGCAGCTCCTGTATTCTGTTGNNTCTTCTCCTTTGCCNCNTGNNNNNNGTNNCAAGTCTTGTCCTTGGCAGCTTGGGCTGTTTGTTGGGTCTTCTCCTTTGCAGCTTGGGCCATTTCCTGGGTCTTCTCCTTTGCAGCTTGAGCCTTCTCTCCAATATTGCCCATCG…
GmaAffx.92623.1.A1_at	CF808348	At2g39940	6e-34	Protein Destination & Storage			GTTTCTATGTTCCTGCTCTATTTGTAGTTCATTTTAGACAATTAGTCTTGTAATAAGCCTGTGTTTTCATTTGAAATTCTGAAACGCTTCCCCTAACGCTATTGGCTCCCTTAAAAACTGAA
Gma.1017.1.S1_s_at	AB030840.1	At3g22640	9e-61	Protein Destination & Storage	Storage Protein		CTTTTCCTTCAATCTTAGGTGCTCTCTACTGAATAACTACGTAAATGTATGCTGTAAGAGCTCATCGTGAGCGTGGAATGTATCTGCCCATGTAACTATAAAAACTTGAGCTCNACCTATCTTCTATCTACTACGAATA
Gma.13375.1.A1_s_at	CD393991	At1g56300	2e-07	Protein Destination & Storage			GGATGATGATGAGGGATTTCTTGATTTCATGCAAGAAATGGCCTTGATGATGCAGAAAGTGAGACCCAAGGATGAGAAAGGCATGTTGGAGGATCTTCAAGGATTGTTAACCGATAAGATGGCAGATAATGAAGGGATGGAAAAGTCTGGGTTAAGCTGGAATTCATCTCCATGTCCTACGAAAAGGGCACGTATCTTATGATTCCCGTGTTACAATTCAGTTAA
GmaAffx.7863.1.S1_at	AW781666	At5g17020	1e-39	Protein Destination & Storage			GTAAGCACATTACACCAAGGGCATTTTGACTTGTGTCACAAGCGCCTTGATTCAATCAAATACCAGATGGTTTGAGAACACATGCAGCATTTTCCTCTTTAAAATTTAGTTTTCCTGCTTTTCCCAATATATCATGTTGGGACTGGTTTGGCATAGGTTCCCTGATTTCAGAGGTTTGGGTGGTTGGCAATACTGCCTTGTCTATTGGTGCGTGTAGATTATTCAGTTGCTGATTTAGGATGATAATAGTAATTTGTGAGGGATTCATCAAGGCAGTTTTCGATAGAATCACAAGATGGATGACTAATTCCAAGTATTGATGACTCCTTAGGTGTGAGAACTCCTAACCTCTGGCAGTTTGTGCAGAAAAACCCTTGTTTGATATTTTGTATTTTTTNN…
Gma.13442.1.A1_at	CD398139	At5g22850	3e-16	Protein Destination & Storage			GTCTCTGCAACAACTGGCACGGGCAGAAGTGAATTTGTGAATGCTGGTGAGATAGGTGGGAGCATCTCTTTACGTGATGGACTCAAGTTGACAAAGACAGGATTCTTGGCTTTCTTTGTGCATCTAACGCTAATTTACTGTTTTGGATTCTTATAGCATTTAACATCGTTAGAGATATTCTTTTTCATACGTATATTCTTTTGCCGGTATATATTTGNNNCNANNGGCNAGACCACNTTAATTTGAATGTTGCTTTGGTGCCTCCTTTCTGCACNATATAGGCTTGTCCGGTTTATCATCCTCAAGTGATTCTGTTGAAGGATGTAGAATCAGATAATAGCTCNTTACTTTTGGCNGTGTTGTAAATTATTTCNCNGGATTACTGATTGAAACCTACAC…
Gma.17958.1.S1_at	BI969270	At5g60160	0	Protein Destination & Storage			GCAACCAATGTTGTCACATCCTTCATATTCAGGGAGATAGCATCAAAACATAAACTTCCCGTTCAGGACTTTGTGGTGCGCAATGACATGNNNTGTGGTTCAACCATTGGTCCTATTCTTGCTAGTGGCNTAGGTATTCGCACTGTTGATGTAGGTGCACCGCAGTTGTCAATGCATAGCATACGAGAAATTTGTGCTGTTGATGATGTGAAGNATTCATATGAGCANTTCAAGGCATTTTACNAAGAATTNTCTCATGTNGATGGTAAGATGGTCGTGGATATATAGGANTATCTCTAATCACGAAATCCTCATTNNNATCCTTTGCTCTAGAAGCTGTTGCTGAAATGGTCGTGTTTNGTAATTTAGTANCNNTATAATGCNGACNTTATTATNNNN…
Gma.286.1.S1_at	AB069959.1	At1g62290	0	Protein Destination & Storage			TACTGCTATAGATATTCCACCTCCACGTGGCCCTCTCTGGATCCTTGGTGATGTCTTCATGGGGCGTTATCACACAGTNTTTGATTTTGGNAAACNNAGAGTGGGATTTGCTGATGCTGCATAGAGTGTNNGCGTNTCTCAGANTATGGCGATCCAATTGCTATTNTTAGTTTATATANCCGTTGCAGTCNAAATGGACCTAAAAAGTTCTGGCTTGTACAGNTTTATATTATTAATGTTAATACTTTGGGTGTTCCATAATA
Gma.7581.1.S1_at	BI969748	At1g10870	1e-158	Protein Destination & Storage			GATGAGGCTCACCATGCTGCTGATGCCAAAGGGCATCAGCATGGTCCTGAAGCCTGTCTGAAAGTTGAAGANACTACTGAGACAGAGAGGTGTTTCCGTGGATGGTCATTATTACATCTGGCATGTCATTCTGGCAGTGCACTNATGGTTGAGTTGTTGCTCCAATTTGGTGCTGATGTAAACATGTGTGACTATCATGAAAGAACTCCCTTGCACCATTGCATTACAAGTGGGAAAAATCAATTGGCAAAGTTTCTATTAAGAAGGGGTGCAAGGCCGTCAGTTAAAGATGCCGGAGGACTCACTGTACTTGAAAGAGCAATGGAGAGGGGAGCAATAACTGACGAAGAACTATTTATCTTGCTTGCTGAATGCCAG
Gma.5713.1.S1_at	BE821972	At3g18190	1e-176	Protein Destination & Storage			GAGATTGAGCTCTCCAGGCAGCTGGGTGCCTGGGCTAAGGTGTTGCATGGGATGGAGGGTTACTGTGTGAGGGCATTCGCTGAGGCGCTTGAAGTTATTCCCTATACTCTGGCTGAAAATGCTGGTTTGAACCCGATTGCCATTGTTACTGAGCTAAGGAATCGTCATGCACAGGGTGAGATAAATGCTGGAATAAATGTAAGGAAGGGGCAGATTACCAACATCTTGGAGGAGAATGTGGTGCAGCCCCTGCTTGTGAGCACCAGTGCGATCACCTTGGCGACAGAGTGTGTGCGGATGATTTTGAAGATTGATGATATTGTAACTGTGAGGTAGAGTTGATTGAACAATGACGAATTTGGAGAGAAACTGAATCATCCATTATCTTCTTTTTTTTTT…
Gma.16476.1.A1_at	AW234360	At5g16070	9e-57	Protein Destination & Storage			AATCATAAACTCAGGGCCTGTTATCGTGTCTCAGTTACTGGTGGTGGATGAAGTAATTCGTGCTGGACGTAACATGCGGAAGCCAACTTAGGTGTTCTTTCTTGAAGTTTCTCTTTTGAATAGGGTGTGCAATGAACTTTCTCTATTTCAAGGTGCCAGCAGCATTCGTTGGGATTGTTATGACTCGCTTCTTTTAATCTGCTCTAATGGAACATTTTTTCTGGGTTTTGTTTTTTCCCATTTTAATTTTATTCTCTCNCAATGNCTGTCATATAAGTGTTCTATGACTGAAT
Gma.6954.1.S1_a_at	BU546201	At5g17710	4e-23	Protein Destination & Storage			GACCTGCAAAGCCTGAACAAGAAGCACCGCAAGAAGAACACGGCAACACTGAAATTTCTGAGGACAGTAAACAAAACGAGGGCAGCACAGAAACAGAGTCTTGAAAGGTCAAAACTTTTGCCTGATTTCAGTTTTGCAATAGTATATCAATTTTAATCTNCCCTGAACATAATGTTGGCTGTAAGAGTCTCCCAGGAGATATTCCTCCCAAATTTCCCTTAAAAAGAAAGTTATTATTCTGAGATTTTGAATTANANNNTTAGATTTTATGTCCTTGCATGGCTTTCATAGAGATGACTGA
Gma.1602.1.S1_x_at	BI971053	At5g67380	1e-157	Protein Destination & Storage			ATAGCTAAGGTGCTTGGGACTGATGAANTGAANGCATATCTNAATAAGTATCATCTGGAGCTTGATCCTCAACTTGATGCACTNGTTGGNAGNCACAGTCGNAAGCCNTGGTCTAAATTNATCAATGCAGATAATCANCATCTTGTGTCTCCTGAGGCAATTGATTTTCTTGATAANCTCCTTCGATANGATCACCAGGACAGGNTAACAGCNAGAGAAGCAATGGCACATCCATATTTCTCTCANGTAAGGGCAGCTGANAGTAGCAGAATGAGGACACAGTAACTTNANNCANNNNNGGATCCATNANCNTGAGTTNNANATATNTGGGATTGTTTTATAATACNNCCTNAAATGTGGCATGGTTGCCTTCTNTNNNANNNATNNNTTNTNNNNNNT…
Gma.5686.1.S1_at	CA935460	At2g44680	1e-103	Protein Destination & Storage			ACATTTCCACACCTCTTCTTGATGACTTATGGACAACTGAAGCCACAGAAACCAGCACAAGGCTATGTTCCNAGAGTTTTTGGGTTCAAAGTTCACAAGCCATAAAGCNGAAGTTGAAGCTTTCATGAAAGTAAAAATCTNCCCGTGTCTCATTTAACTCTTCNTTATGGTTCTCTTTGCAACANCNGGCNAATCATATGCTTTCCAAACCAGTACAATCTAGGCATCTGTTTTANTTGTTATAGGAGCTTGTTGTAAAGAAATATGCAGACATGNGAAGCAAGTGCTTAGTTTCAGCTTCNGATTCAATGAGNAAGTGCTTAGGTACTTGATGATACTTTTTAATGACTNTTTACGAATTGTATTCTTGCGATTAACTTAATATT
Gma.1353.2.S1_at	BG041704	At1g72710	6e-79	Protein Destination & Storage			CTGCTGCTGGACCAAGTTCAGGCATGCCACCACTGGNTNCAAATGGTGACGGACAGNTAGGTGGAGAGGATGGTAATGGTAGGCCTACTAATTGGTCTTCATCAGATCCTACTCGTAGGAGAAACTCTGGAACTATTGCTAATGACGGAATCTTATCTAGACAAAAAGGCCCAGTTACATATGACTCAACTGGATCTAAAGATGCTATGTTGTCAAGTTCTAATTTCTTCTGGTCAAGTGGAACTGCAAAGCGAGGTGCTGTCTCAGGCAACCGTGATGTAGTTGGCAGTGAGACCGAGGCCTCTCGTTCTCTGATCCTGGATTCAAGTCAGGGAGCACTTCGTAAAATCCCTGCCCCTGGTGCTCAGAGAAGTTCAGCTATCATGTCATCTGAGCACA…
Gma.10799.1.S1_at	BG237181	At4g26100	1e-163	Protein Destination & Storage			AGTTGATAGGCACTGCCAACGTTGCNTGTGTTGCTAAGTTGAGCTGTGAGNAAATTNGGATCTGAACTTGAAATTCTGNCTTTGTATTGTTAACNCATCTGGTCAAACCGATGAAGCTGTGAAGCTGAAATAATTTGAGCNNAANCNAGGGATTGTGCTTGCTGTAAAGCTCAGTTTTAATTGGNNCTNCTNGCTGGAACTCCTAAGTTTTATAACATNNTTTTCTGNNAGTTATTATATTGGNTTACCAGATGTTTACAGTTTCACGNNNNTGGACTGCAAATGTCAAAANCTATCAAATACCAGCAAAAANTGTAATTAGCCATTGTACTCTTGTTGGATAAGATTCCCTTGGTTTACACGATGTAATTGTCTGGCAAATATTTTGGTATTAGGAAC…
Gma.10763.1.S1_at	AW567704	At5g12020	2e-38	Protein Destination & Storage			GATCGACATGCCAGGCCTGAAATCCGGGGACATTAAGGTGCAGGTGGAGGATGATAACGTGCTTCTGATAAGCGGCGAGAGGAAGAGGGAGGAGGATAAAGAGAAAGAAGGGGCTAAGTATTTGAGGATGGAGAGAAGGGTTGGCAAGTTCATGAGGAAGTTCACGCTTCCCGAGAATGCCAACACCGATGCTATCTCTGCCGTCTGCCAAGACGGTGTGCTCACTGTCACTGTCAACAAGCTGCCTCCNCCTCAGCCCAAAAAGCCCAAGACCATAGAGGTTAAGATCGCCTGAATTAATTTCTTCGTTTGCACTGAGACCTGCTATCATTTCCTCTTTTCCTTTTGTGTGTGCCAATGCTTTTCTATCTTTCCGTCTCTGCTTATGGTCATGATATG…
Gma.7766.1.S1_at	BU550058	At5g12020	8e-36	Protein Destination & Storage			CCTAACTCGTACGTTTTCGTGATCGACATGCCTGGCCTNAAATCTGGGGACATTAAAGTGCAGGTGGAGGACGACAACGTGCTTCTGATAAGCGGCGAGAGGAAGAGGGAGGAGGAAAAAGAGAAAGAAGGGGGAAAGTATTTGAGGATGGAGAGAAGGCTTGGCAAGTTGATGAGGAAGTTTACTCTCCCTGAGAATGCCAACACCGATGCTATCTCTGCTGTCTGCCNAGACGGTGTGCTCACTGTNACTGTCAATAANCTGCCTCCTCCTCAGCCCAAGAAGCCCANGACTATAGAGGTCAANATAGCCTGAATTCCAACTTCCAACGCTATCTATCCCTGTTTTTGTT
GmaAffx.93268.1.S1_at	CF807875	At2g29500	3e-57	Protein Destination & Storage			GAAATCTCTGGTTGATCCATGTTATGGTTGAAA
GmaAffx.93268.1.S1_s_at	CF807875	At2g29500	3e-57	Protein Destination & Storage			AGGAGCAACGTCTTCGATCCATTCTCACTCGACATGTGGGATCCCTTCAAGGATTTTCATGTTCCCACTTCTTCTGTTTCTGCTGAAAATTCTGCATTCGTGAGCACTCGTGTGGATTGGAAGGAGACCCCAGAGGCACACGTGTTCAAGGCTGATATTCCAGGGCTGAAGAAAGAGGAAGTCAAGGTTCAGATTGAAGATGATAGGGTTCTTCAGATTAGCGGAGAGAGGAACGTTGAAAAGGAAGACAAGAACGACACGTGGCATCGCGTGGAGCGTAGCAGTGGTAAGTTCACGAGAAGGTTCAGATTGCCGGAGAATGCAAAAGTGAATGAAGTGAAGGCTTCTATGGAAAATGGGGTTCTCACTGTCACTGTTCCTAAGGAAGAGGTTAAGAAG…
Gma.11131.1.S1_at	BI968388	At5g59720	3e-19	Protein Destination & Storage			CCGGCTTGGAATTCGGATTCGGATTCGGATCATCCGTGAACACACGTGTGGACTGGAGGGAGACTCCCAGAGCGCACGTGTGGAAGCTGGTGCTTCCCGGCTTCTCCAACGAGGACGTGCTGGTTGAGCTCCAAGACGAGAGGGTGCTCCAAGTCAGCGTGGAGAGCGGCAACTTCGTCACGAGGTTTAAGGTCCCCGACAACGGTAACCTAGAACAACTCAAAGCCAACATGCGTCACGGGGTTCTCGTTGTCACTGTTCCCAAGTTTCATCAACCCACTACTACTGCCCCTGCCAATAGGAATGTCAGGGAAGTTGAAATTGAAGGCACCGACTGAACCCAGTGACCAAAACGCTGTCTTTAATCATGTCTTGTTCGATGGAACTGTGTTTTCTTAT…
Gma.2587.1.S1_x_at	CD404912	At5g66140	1e-108	Protein Destination & Storage			CGTTGCTGAGATCGAAGCGGAGAAGGCAGCTGCAGAGGCTGCTAAGAAAGCCCCTCCTAAGGAGACATAATTTTCTGTTTTGTGTTATGCGAGCATTGTTCTTGCTAGGTATTGGCTGTACTCACTGAAGCTNAAAATTGATGCCATTGTGTCTGAGATTGATGCAAAGAAAACGGCTGCTGAGGCTGCAAAGAATACCCTTTCTAAGGAGACATGATTTTATGTTACTTTTATTTAGCTCGTGAATTGTTCTTGCTAGATGTTGGCCTAACTTAAAATGACTGCTTTATTGTTTTTGGGTACTGCCATTAGTGTTGGTCATATTTAATTGCATGTCATTATTATTGAAGTTCAATTGAGTAGGGTGATACACANCATCTTCATAGACAGGAGCTGGTT…
Gma.16887.2.S1_at	BG509166	At4g31300	1e-112	Protein Destination & Storage			GAAATGGAGCCCCACAACTCCTTGCTAGACATTCTTGGTGCCCCAGAGCCGATGAGCATGTGATGTGAAGAAGTTGCCGTGTTTCAGAAATGTTTCCTGATAGATTATATCTTGTCTTCTCTCTTTTATGAACTAGCTAACGATTTGTGTAGTCAATTACTTTGTTTGGTTGGATATTTTTGATGGTTGAGTTATATCCTTTTGTTACGTACCATGATTAACCTTTNTTTCCTTCATCATATAGCTCCAAAGTAACGTGTACTTTGGTGAATTGGTCTTGCATAGA
Gma.5810.1.S1_at	AW309249	At3g26340	1e-125	Protein Destination & Storage			GTTACCCCAAGCACCGTGGAACAAGAAATGGTTGAGGCNACTGGNGCTTGATGAAGNAACTCGTGGATNTNNNTTTNAGTTTCCTTTGCTTGCNAGCNTATTTTGAACCNNNNGNATGAAACTGATTACTTTATAATTGNAAATTGACANTAGTTTGATAAATACAAGTGCTGTCCTATCCTGTTGTGTTTTNNATCAANNNATATTTATCATNNAAAATGATAGATTAGAGCNCATNTATAATGTGNAGTGNTTTAAATNGGTAAAGCAGGTCAGANGNGTATTGCNNGNTNTTGCTAATGTAATNCATCTTGCGATTAATGGTTTTCGTGGCAACTTCTGAAAGTTNTACAAGAANCTTCCTAGGGAGAATTGTGGTTCAATGTCTTCGACTGATTG…
Gma.4089.1.S1_at	U21722.1	At4g25200	3e-42	Protein Destination & Storage			TTGTTTAGAAGTCTACTGCAGTCTGAATTTGACTTGTCAATGAAATTCGTGTCAT
Gma.4089.1.S1_s_at	U21722.1	At4g25200	3e-42	Protein Destination & Storage			AGCGCTCGTCGCTACACTAGCAGGATTGACTTGCCGGACAAGCTCTACAAGATTGACCAGATCAGAGCTGAGATGAAGAACGGTGTGCTCAAGGTCGTTGTGCCGAAAATGAAGGAGGAAGAGAGGAAAGACGTGATCAGTGTTAAGGTTGAGTAGAACAACCCAAGCTGATTTGGCCATTTTGCATCGACACTACTCTTTAGTTTTCTTTTATTAGGTGGTGATGAATCTAGTTAGTAGATATAACAGCTTAATAGTATTGTTGCTGTGTTTGGTTTTGAAACTTCAAACGTATCTGTANTAATTGTTATATAGAGTTGTGAATGAGCTTGTT
Gma.2136.3.S1_at	BE057237	At1g09100	1e-156	Protein Destination & Storage			AGGAAGATGAATGTTCACCCAGATGTCAACTTTGAAGAACTTGCCCGGTCCACAGATGATTTCAATGGCGCACAACTGAAGGCTGTCTGTGTTGAGGCTGGCATGTTGGCTCTACGCCGTGATGCAACTGAGGTGAACCACGAGGATTTTAATGAAGGTATTATTCAAGTCCAAGCAAAGAAGAAAGCAAGTCTGAACTATTATGCATAGGCTGGATTGTGGAACAAGCTATTTTTCAGTTTACAAAGATCCATTGAGATATTTCAAGCCAATGGAGAACCTAAGCGGATGCTTGACATTTATTATCTTTTTCTTATTTTTTGGCAATCTTTAATCGTGTGATAACCTTCAGCTTGCCAGAGTCATGA
Gma.1686.1.S1_at	AW350956	At5g58290	0	Protein Destination & Storage			ATGGCAACTAACAGAGCAGACACCTNTGGACCCTGCTCTGTTGCGTCCTGGAAGGCTTGATCGTAANAATTGAGTTCCCTTTNGNCCTGATAGACGCCAANAAGAGGCTCGTATTTCAGGTTTGCACAGCCAAAATGAACTTGAGTGATGAGGTAGACCTAGAGGATTATGTTTCTCGTCCTGACAAAATCAGTGCTGCTGAGATAGCAGCCATTTGTCAAGAAGCTGGAATGCATGCTGTTCGCAAGAATAGATATGTCATACTGCCGAAGGACTTCGAGAAGGGTTACAGGACAAACGTGAAGAAGCCTGATACTGACTTTGAATTTTACAAGTGATGATGTTGTAGCTTTGAGATTGGTGTGTGTACTCGCGAAGTTAAATATACAGTGAAGGGGG…
Gma.5792.1.S1_at	BG649960	At1g20200	0	Protein Destination & Storage			CAAATATTTAGGACGATGCGAATTCTGTTCAGAAGTTTTATTATTAGAAACTGTTACCCTGGAGGATTTATTGAATTATAGCATGACAATCTATTTTTCTG
GmaAffx.88721.1.S1_s_at	CK606003	At1g20200	2e-93	Protein Destination & Storage			AAGTGGGCTGTGATAGTGCGTTTACTGTTGGGAGAAATACCTGAGCGGACTGTCTTCATGCAGAAAGGAATGGAGAAAGCTCTAAGGCCTTACTTTGAGCTTACAAATGCTGTGCGGATTGGAGACTTGGAACTGTTTAGGAATATTGCGGACAAGTTTGCCACTACCTTTAATGCAGACAGAACCCATAATTTGATTGTTCGTTTGCGGCATAATGTCATCAGGACTGGTTTACGCAACATCAGCATCTCCTATTCTCGCATCTCTCTAGCTGATGT
Gma.13205.1.S1_at	CD390316	At4g38630	6e-13	Protein Destination & Storage			TACAAAGGATCAAGGCAGCCAGTCAGACATGAGCAAATTGTTGGCCGATCAATCCTTTGTATCTTCTATCCTTGCATCGCTTCCTGGGGTTGACCCAAATGACCCTTCTGTCAAGGATTTGCTGGCTTCCATGCAAAATCAGTCTGAGCCTCAACAGAAGAATGACGACAAGCCATCAAACGAGGAGGAGAAGAAGTAATCTTTGAGAACCACTTTGCCCTGTATGGTTTTATTTTCTTGGTAGCATTCTTCGCGGCTGTTACTAATCGGGGGAACTATTTACGCATGTTTCAATGTGTCTCTCTGCACTTTAATTGGAACCAATGCATGTCTCTCGATTGAATATTGGATGATTTTTAACTTAAAATGTTCTTGATTATCATGCCTTGTTCTTGGTTG…
GmaAffx.27129.1.S1_at	BM178088	At4g38220	1e-105	Protein Destination & Storage			ATTGCTGAGGAATGGGCACCTTCATCCCGCAATATGTCATTTACTNNNNNNNNNTTCAAACAGAAGGCGCACACACGAGATAAGTCTGGGAAACCAATCCTCACCAAAACTGATAGTTCCAATCCCTGGTGGGCCCTTTTAGAAAATGCTGTCCAAAAGGCTGGTGGGAAACTTGGTAAGCCCGAGGTCTTTCCCGCCGCTACAGATTCACGCTACTTCCGTGAACGTGGATTACCAGCAATTGGATTCTCACCTATGGCAAACACTCCTGTTCTTCTACATGACCACAATGAGTTTCTGCACAAAGATGAATACTTGAAAGGGATTAAAATCTACGAGTCAATAATTAAGGTATATGCATCGTTGGATGATAATGGAAGAGATGGAGCATCCAAAGAT…
Gma.16348.1.S1_at	BI786109	At1g26910	1e-115	Protein Synthesis			ACAGGAGGCTCTTCGTCGTGCTAAGTTTAAGTTCCCTGGTCGTCAGAAGATCATAGTTAGCCGGAAATGGGGTTTCACCAAGTTTAGCCGTGCTGATTATCTCAAGTACAAGTCAGAGAGCAGGATTGTGCCTGATGGTGTGAATGCTAAGCTTCTTGGGTGCCATGGACCACTGGCAAACCGTCAACCAGGACAAGCTTTTCTATCTAGTGCTACTGCTACTGCTTAGATGGCTTGTTACATGGAAACAGTGGGCTTTGACCACAATAGTTGTGTTTGACTCAATTTGAGTTTCTTAATTGCTCTACTCGTAGTATTAAACTATTAAACTATGTTAAGTTTATCTAATCTTTTATGAACCATCTTAAATGGAATGAATGTCATATTTTGTTGGTATTT…
Gma.10892.4.S1_s_at	CD403449	At5g45775	1e-83	Protein Synthesis			ATTTCAGGGGAGTGTTTTTATCAGTTTTGTCAACTATCTTTCTGGGATAGTATCTTAATTTTGAGGCAGGTT
Gma.8329.1.S1_s_at	AI442912	At2g37190	7e-82	Protein Synthesis			TCAATGGCGAAGGACCTCAGCGGCAGCATTAAGGAGATTCTCGGGACGTGCGTCTCCGTCGGATGCACCGTTGATGGAAAGGATCCCAAGGACTTGCAGCAGGAGATTACCGATGGTGATGTTGAGGTCCCTCTCGATTAAGGAGGAAGGCTTTGTTACTCTCTTTCTCTCTTTTTCTTTTGTCTTTCTTCAGATCGTTTCGTGTTCTTTTTAATAT
Gma.1859.1.A1_s_at	CD395292	At2g44860	9e-29	Protein Synthesis			GCTCCTTCTGTGCTTCAACAGGATCCATCTCTCACTTTACCAAAGATCAAAGTCAAGGTTTCCCAACAGCAATCAGAGGAGAATCATGCCATGGAAGAGTAATTCTAACAATGCTGCACTTAATTTTTGCTATTTTAATATTTGTTGCTAAATTAGTTGCCTGTAAGGTCCAGTTTACCAGTT
GmaAffx.81459.1.S1_at	BF596892	At3g49910	2e-11	Protein Synthesis			GCTGTGATTGCATTTTTGTTTCAATAATTTCTAATTCTCTATCTTGTCGCAGCTACGGATTGTCTTTTAT
Gma.10577.2.S1_at	BI468935	At1g70600	1e-73	Protein Synthesis			CTTCGGAAAGGTGGGTATGCGCTACTTCCACAAACTCCGCAACAAATTCTACTGCCCCATCGTCAACATTGATAAGCTATGGTCCCTCCTACCCCAGGAGGCCAAGGACAAGGCCACCGCCGACAAGGCGCCATTGCTCGATGTCACCCAGTTCGGTTACTTTAAGGTTTTGGGTAAAGGGGTTTTGCCTCAGAACCAGCCTCTGGTCGTGAAGGCCAAGCTTGTTTCCAAGATCGCCGAGAAGAAGATCAAGGAGGCNGGTGGAGCCGTCGTTCTCACCGCCTGATTTTTTTNGGGTATTTTTATTTAAAAGGATTTTGAGATCTGTTGTTATTTTTGGTTTTGGTTCTTGTTTTAATCTGTCTGAACTGGATTAGTTTAAATGTTTTTTTTTATATT…
Gma.17555.2.S1_at	BE820725	At4g18100	2e-25	Protein Synthesis			TTAACATGGTCTTTTACCCCTCACTTGCCGTCTCAAATTCGGTTTTAAGTGTTGTAGTTCCTCAATTTTTTCAGATCTCAATTTTTAGTCCGTCGAAACTTTTTTTAACAAATTTTATTCTTATGTTAATTCTCCATCAGCATTTTTGGGAATTAAAAATTAGAATGTGAAAAAGTTGAAGCATAGCGATAGTTTTTTTTTTTTGGATACTATAAACATGCGATAGTTGCTTGAAGAATACCAGAAATCATTGTATAGGTTAACGCCAACCATGTTGTGGAACGC
Gma.12510.1.S1_at	CD390734	At1g74270	7e-56	Protein Synthesis			AAATCAATACCCAAACACCTCATTAATCCAGATTGAGAATGTAAACACTAAGGAAGAAGTTGCGTGGTACTGTGGGAAGCGTATGGCTTACATTTACAAAGCCAAGGTAAAGAAGGACGGAAGCCACTATCGCTGCATTTGGGGTAAGGTCACCAGGCCTCATGGTAACAGTGGTATAGTTCGTGCTAAGTTCAAGTCCAATCTGCCGCCCAGATCAATGGGAGCAAGGGTTAGAGTCTTCATGTATCCAAGCAATATATGAGGTTCTCAGGACTCGTGAGTCGTGGAGCTTGTTTTGTCAGGGTATTTGATAGGAATTTATATTATGTTTTTCTTTTTTGGTAGCTCCCGAGCAGGGTAGTATCCTTGTTTAGGATGAAGAGAATGTATCGCATGTTT…
GmaAffx.12010.1.S1_s_at	AW568804	At1g74060	8e-08	Protein Synthesis			GGCCGGGGTGAAACCACATGAGCTAGTCTTCTAGAGGAAAGAGGGGTGTTACTCTTGTTTTTGATATCGTGTTTGTTTATTGATGCTGGTTCTTATAGTTGCCCTCTTATAACATTCTTGTTAGCAGACAAATGAAGAACCTAAAAT
Gma.1465.1.S1_at	CD416674	At5g23740	3e-66	Protein Synthesis			CATTATGTTTTTCGAATACTATTTGCCTTTTAATTT
Gma.15476.1.S1_at	CD415960	At3g52580	6e-59	Protein Synthesis			CATCACTGGCGGGATGAAGGTTAAAGCTGACAGAGATGAATCATCTCCATATGCTGCTATGCTTGCTGCGCAGGATGTTGCTGCTAGATGCAAGGAACTGGGCATAACTGCTCTTCATATCAAGCTCCGTGCCACAGGTGGAAACAAGACAAAAACACCAGGTCCTGGTGCTCAATCAGCTCTTCGAGCCCTTGCTCGTTCAGGAATGAAAATTGGTCGCATAGAGGATGTGACCCCCATTCCTTCCGATAGCACACGGAGAAAGAGTGGTAGAAGGGGTAGAAGGCTTTAAGCTTCTTATGGTATATGACTGGAGTTGCCATATTTTAATTTCCATGTCAAACAAACAGATTTGTGCCATTTTGAAATTTTCTTCAATCAGAACTTCTTTTGTATTTC…
Gma.4710.2.S1_at	CD402482	At2g09990	6e-70	Protein Synthesis			GTTCTACCAGAAGTACGTTGATGAACAGAGTAAGAAGGAGATCAAGGACATTCTGGTGAGGTACGATCGTACCTTGCTCGTCGCGGATCCCAGGCGCTGCGAGCCCAAGAAGTTTGGTGGGCGTGGCGCACGTGCGAGGTTCCAGAAGTCTTACCGTTGAAGGAGAATGGTGGTGTTTTTGTGTTTTTTTGTTTTTGGTTCGGTTCATGTTTTATGCTGTGGAAAAAATGAAAACTTTTGTTGGTGGTTTTGGTAGTTTTATAATTTTGATCGTTTTTTTTATAATGGTTGGATTATGGATTCTTGTTTTGATTCAACTTTTTCTGTTTAGGTAATATGAAGGTACGGATTATT
GmaAffx.89533.1.S1_at	CK606509	At4g09800	8e-25	Protein Synthesis			GTATTCTCAGGTGGTGTCAAATGCACTGGATATGAAGTTGAGGGATGATTTGGAGCGCTTGAAGAAAATCAGAAATCACCGTGGTTTGAGGCACTACTGGGGTCTTCGTGTTCGTGGTCAGCACACTAAGACTACTGGTCGCAGGGGTAAAACTGTTGGTGTCTCTAAGAAGCGTTAAGCTGTGTTATATGTTTGCTTTGAGAAATAGATATTTGTTAGGGAAGCAAATTTTGAATTATGTTGGACAAGTTTCCATAGAACATAAATTTTATTGGTTAAGTGCTGTGATGCTTTCAATTTTTTTAA
Gma.15851.2.A1_at	CD392230	At3g56340	3e-33	Protein Synthesis			GTTATGCTGACCAACCATATCCTAAGAACAAATTTGTTGCTGCTTTATTTTTGAACATCAGTTTTGTGGAGGGGTATTTTATTCTGATTATCTACTATAGTCGTTGGATAGTATCTTTCTGGTTATAATGGTGGCTATTTTTGAAAGTGGAGCTTGATATCATAGCTTTCAGCAATTTGAAAATGTATCTCCTGATTAAGTTTTTAT
Gma.15851.2.A1_x_at	CD392230	At3g56340	3e-33	Protein Synthesis			GGAAGCCTGTGTCTATGAACAGTACACGCTTCCGAAACTCTATGTGAAGATGCAGTACTGTGTTTCCTGTGCTATCCACTCTCATGTTGTGAGGGTTCGATCCCGCACTGACAGGAGGAAGCGTGACCCTCCACAGCGATTCATCAGGCGCAGGGATGATGCACAAAGGCCCGGTCAGCCTGGTCAAGCACCTCGTCCTGCTGGCACAGCAGCACCTGTCCGAACCTAAAAACAAATCCCAAGACAAAGCCTTGATGTTATGCTGACCAACCATATCCTAAGAACAAATTTGTTGCTGCTTTATTTTTGAACATCAGTTTTGTGGAGGGGTATTTTATTCTGATTATCTACTATAGTCGTTGGATAGTATCTTTCTGGTTATAATGGTGGCTATTTTTG…
Gma.802.1.S1_s_at	CD398369	At3g56340	3e-33	Protein Synthesis			TTTATGTTACAAACTTATACTCCATTTGCTGTTTATTTTTTAAATTTCAGTTTTGTGTAGGGATATTATATTTTCTTCTAGTTGTTTGCTTTAGTCCTCGGAGAAAATTTTCTATTNTTATTATTTGATGGTTTTGAGGAGAATGAAACCTGATATATTATTGATAT
Gma.11190.1.S1_at	CD402535	At5g35530	1e-106	Protein Synthesis			ACGATCCACACCCCCAAGGAAGAGGAAGAATATGCCCGGCCTGCTGCTGTTTTGGCAACTGATATTGAGGTCCCTGTTGCTTGAAAATGTTTTATTTGTTCTTGAGTAGAAATTCATAGCACCTGAGTACCTAGTATGCAGTGTTCATTTGCTTAGACCTGGTCAGATTTTTGTAGTGTCTTATCTTTGTTGGGAAAGACTAGTTAAATTTTTTTGTAGTTTCTTAACAGTTTATGAAATTGCTACAAAGTGCCAAGTATTTTAAGCATCAATT
Gma.11295.2.S1_x_at	BE209656	At5g56670	9e-23	Protein Synthesis			CGATCTCGTTCTGTACGTGCAGCCGCAGCAAGTGATCGAAGCGAAAAGAGAGAAATTCATCGTCGCAGTAATCATGGGTAAGGTTCATGGATCACTTGCACGTGCTGGTAAGGTTAGAGGGCAAACCCCGAAGGTGGCCAAGCA
Gma.17859.1.S1_at	CD395921	At3g02560	4e-88	Protein Synthesis			GAAGGATGTTGTCTTGATTGCCACAAGGAGGATCGTGCGACCGCCAAAGAAAGGCTCTGCTGTTCAGCGACCCCGAACCCGCACTTTGACCGCTGTCCATGATGCCATGCTGGAGGATGTTGTGTATCCTGCAGAGATTGTTGGCAAACGGGCCAGATATAGAATTGATGGCTCAAAAATAATGAAGGTTTTCTTGGACCCCAAGGAGCGCAACAACACTGAGTACAAGCTGGAGACCTTTTCTGGAGTTTACAGGAAGCTTACTGGAAAAGATGTAGTATTTGAGTATCCAATCTCAGAAGCCTGAGATGCTGCTGCTTGGTTTAATGGAGTATTGTTTTTTTGGCAGATTTTTCTGTTAGAATTACATATTTATGTTAAACAATAACCAAAATTTTG…
Gma.7067.2.S1_at	BQ610144	At5g20290	2e-88	Protein Synthesis			AGATGTACGCTTTTTGACTGTTGGTCGATCTCCTTTAGGGTGATGCCATAGGACATCCTTAGTGTGAACGTTTTATTAGCGTACATCTTGAATTTGAGACAGGGATGCATGAGTATTCTACTTGTCATTACCATATCATCAGATAAGAGAACAAAACTGCGCTGATTTTGAAATTACTG
GmaAffx.92132.1.S1_s_at	CF807857	At1g72370	5e-94	Protein Synthesis			TCGCAGAGGGAGACGGACATCCAGATGATGCTCGCCGCCGACGTTCACCTCGGCACCAAAAACTGCGACTTTCAGATGGAACGCTACGTCTTCAAGCGCCGCACCGATGGTATTTACATAATTAACCTTGGAAAGACATGGGAGAAGCTTCAGCTTGCTGCTAGGATTATAGTCGCCATTGAGAACCCACAGGATATCATCGTTCAGTCCGCCAGGCCTTATGGCCAGAGGGCAGTTCTAAAGTTTGCTCAATACACTGGAGCTCATGCAATTGCAGGAAGGCACACTCCCGGAACATTCACTAATCAGATGCAGCAATCCTACAATGAGCCTCGTCTTCTGATTCTAACTGATCCAAGAACAGATCATCAGCCTATCAAGGAAGGTGCTCTTGGAAAT…
GmaAffx.90973.1.S1_at	CF806698	At5g56680	2e-63	Protein Synthesis			GGGTTTTGATAGTTATTTCATTTCTTTATCCTCCACTTTGATGCTGGTTGTTTTCATTCGTTTACAAACTCTGCTCTGCA
Gma.6914.1.A1_at	BG155750	At1g07910	1e-22	Protein Synthesis			AGAATTCGTGGCCTCATATTACCTTGTGGACTGCCGAAGGTGTTGCAGCCAAGGATGCCAACATGTTACCACAGTTGCTTGCAGAGGGGAAAGCAAATCGGATTGACTTCAATCCTCCCATCAATATATCTGGCACACTCGACTTTTATTGAGTTGAATTCCTTTTGCTACTCATCTTTCTAAAATAAAACCAACTGAAATTAAGGTGGTCATGTGCTTTTATTTGTTCAACAAAATCATACCCTTTGCTGGCATACAAGTTGGATCCGATATTTAGTGAAGATAGATGATGGAGAAAAATTTTGTAGGAGCGAGCATTTTCTCCTGAAGAACTGTGTACATATATATATAGGCTTTTTAGAAAGCCNGAGTATGGTTTCTGGAGTCTCATTGCCGAAT…
Gma.5683.1.S1_at	CD410890	At2g04520	1e-45	Protein Synthesis			GGGAACGGCCGCTGCGAGGCGATGTGCATCGACGGCACCAAGCGCCTCTGCCACATCCGCGGCAAGATGCACAAGAAGGTCTGGATCGCCGCCGGCGACATCATCCTCGTCGGCCTCCGCGACTACCAGGACGACAAGGCCGACGTCATCCTCAAGTACATGCCCGACGAGGCCAGGCTCCTCAAGGCCTACGGCGAGCTTCCTGACAGCACCAGGCTCAACGAGGGCATCGGCGCTGGCCTTGATGAGGAGGAGGATGGGGCCGGAAATGATTATATCGAGTTCGAGGATGAGGATATTGATAAGATTTGAAGGAAGAGAAAAAAAAGTTAGGGTTTTGGTTTTGGTTTGTGTTGCTGATGCCTCTTTTTTTGTTTTTGTTTTTGTTTGAGATTATAT…
GmaAffx.58915.1.S1_at	BU763501	At2g05830	2e-93	Protein Synthesis			AGGAACTCTTATTGCCGATTCTGCTGCAGCTGCATTAATGAAGGCAGGACATGTGGATGCTGTTGTTGTTGGGGCAGATCGGGTTGCATCAAATGGTGACACAGCCAACAAAATTGGAACCTACAGCGTTGCCTTGTCCGCTAAGTTTCATAATGTACCTTTTTATGTGGCTGCACCCCTAACTTCCATTGATCTATCACTTTCTTCTGGACAAGAAATTGTCATTGAGGAGAGGTCTCCCAAGGAATTGCTGAACACACATGGAGGACTTGGAGAGCAGATTGCTGCCTCAGGAATTTCTGTGTGGAACCCAGCTTTTGATGTTACTCCTGCTAATCTAATATCGGGGATCATCACTGAGAAGGGTGTCATTACGAAGACATCTGCTGGTGATGCATT…
GmaAffx.10536.1.S1_at	BU548183	At3g56150	8e-28	Protein Synthesis			GTTGAACACTCCAGGCTTCAGGCATTGGCATTCCAATTGACCGAGAAATTATCTGTCCTTGCAGAGAGTAATGAAAAAGCAGCAGAGGCCAGGGTAGGTGGTGGTGGATTGGATCTGCCTCTAAGGCGTAGAGATGGCCAGGACTATGCTGCCGCCGCGGCTGCCGGCAGTGGTACAGCCTCTTCCGGTGGTAGGTGGCAAGACCTGTCCCTTTCTCAGCCAAGGCAAGGCAGTGGGCGTGCAGGGTATGGTGGAAGGCCAATGGCATTGGGCCAAGCAGCTGGGAGTGGCTATTCAAGGGGACGAGGAAGGGGTTCGTATGGAGGTTCAGGGAGGACTGCTCAAAGGGGTTCAGCATTGNNNNGACCCCAGGGAGATGGATCTACTCGCATGGTTAGC…
Gma.6308.1.S1_at	BG359665	At3g13920	1e-150	Protein Synthesis			AGGGTGTTGCTATCAATTTTGTGACTGGGGATGATGAAAGGATGCTGTTTGACATCCAAAAGTTTTATAATGTGCAGATTGAGGAGCTGCCAGCCAATGTAGCCGATCTCATTTGATTTGGTCTTCCCATCATTGGTATGCTTTTTGTTATGGAGGCCGCTGTCATTATTTTATTTTTCACGGCCCAGGGCCTTTCTCTAGCAAGACTTGAACTTAACCCCAAACCGGTGATTTGAATTTGCCATTCTTCTCTCTAATTTTGGGTCTAGCAGAATGCGTTGTTGCAATTTTGTTGCTTGCTTGTTTGTTTGTCTTATTACTAAAGATTGTAGATTGCTGCTTTCTCTTT
GmaAffx.92104.1.S1_at	CF807829	At3g13920	3e-69	Protein Synthesis			TTATGTAATGTTTCTCACTCTAACCTGTCTCCCCC
Gma.4444.3.S1_at	CD412673	At4g18040	3e-18	Protein Synthesis			GAAGTTTATAGCGTTCTTAACTGGAAGCAAATGAAGGAATGCAGTACATTCCTTGAATGAAGTCGCATTTTGATGCCTGGTCTTTCCTCTCCTACATGTAGCTGAGCTTCTTAGCCCTTTTGACCTCATCTTATTAGTACTTTATATTCGATGTGGACGGAGAATATTTCATA
Gma.4288.1.S1_at	BE659478	At1g11480	9e-16	Protein Synthesis			CACGGTACAGTAGAGCAGCTTCGGCGGTTGAACTTGCACAAGCATTCTCCAGATCTGTATCAGATCCAAAAGTGAATGATAGGTTTTCAGGTCAAAGGGGTCTGAACACNNNCNANAGCAGCAGGACACAAGTTCCATTTTCACGGCTTNTTGGTCCTACATCAAGGCCTCAGATCAATGGTTATTAAAATATTTGGTGGATAATTGGACTCACTCAAGACCAATTTCTATGAGATAGCATTGGATTCATGCAATGTGGAATTGCAGAGCACTTCATGTAGTGGCTGTGGTTTTAGTTATTTTCTCCNCATTCACAACAATTGAGTGAGAAATTAATGATTTCTCAAGTTACATAGCCTTGGTTGTGACAATACCTTCTTACAATTACCATGCTTTATT…
Gma.6450.1.S1_at	CD401012	At1g18070	3e-56	Protein Synthesis			GAGGTTCACTCTTCGCACTGAAGGAAAAACTGTTGCTGTGGGAAAAGTCACTGGTCTGTGAATTTGTAACAATTTTGACTTGAGGACGGGAATTCCTGCNCAAATNTANTGGAGTGGCAGCTNNGAGGCATAATTGACAGCATCAAGTTTACCATATATTCATTTCGGTATTTATTTTGCTTTTACTTGGGGTAGTATTCAGTGAAGAGTTATTTGTTGCCGCTGGTGTCCATGATGTACTTGTATACGGCCTTACAAGGCNTGGNTGCTTCAGTATTTTGCGGTTGGCTGCTTCCAACCGTGCTACTCNTGAGATATAATTTGAAAATNGATGGTTTTAAATCAATCTGCCTTATTAGCTGTGGAATCTGATGACTATTTTAGCCCAACAGCGG
Gma.17980.1.S1_at	BM526726	At5g60390	5e-78	Protein Synthesis			AAATGGTTATGCTCCTGTGCTTGACTGCCACACTTCTCACATTGCCGTCAAGTTTGCCGAACTTGTGACCAAGATTGACAGGCGATCTGGTAAGGAGATTGAGAAGGAGCCCAAATTCTTGAAAAATGGAGATGCAGGTTATGTTAAGATGATTCCCACCAAGCCTATGGTGGNCGAAACTTTCTCCGAGTATCCTCCTCTTGGTCGTTTTGCCGTGAGGGACATGCGACAAACTGTGGCTGTTGGAGTCATCAAGAGTGTGGAGAAGAAGGACCCAACTGGAGCCAAGGTCACCAAGGCTGCACAGAAGAAGAAGTGAATACATTTTTGTGTTTCTTCAAGTACATGCGATCATAGTTACATTTATAGTTACANNNNNCNNTNGNNNCNNANNANTNN…
Gma.6218.1.S1_at	CD408141	At3g56010	1e-21	Protein Synthesis			GATGTCAATCTTTGTGATATAGAGCCGGTCATAGTCCTGTTAAGGAAGTGAAAACATTGTTTCAATTTTTGTTGAAAGTTTTATGAAAGTGAACAGTTTCTTCAAAAAGCTACTTGTTCAAACTAAATATATTCTTTACCTGC
Gma.11483.1.S1_at	CD391856	At4g30690	9e-63	Protein Synthesis			GGTCATAGTAAACCTCAAGGGTCGTGAAAATGAATTCCGGAATATGGCTATTGCGCTTATTACACGTTTTCAGAATGATGTTGGGGAGCTTGGAATAGAGGAGACAAAAAACTTCCGTGACAGAAATATCTTCATAATTTTGGTTCCAAATAAAGTTGCTGTGCAGAAAACTCAAGAACCACCAAAGAAAAGAGACAAGTCAGCTGCAGATGAAGTCTCCGTTAGTGCCCAAGCATAACCGCAAACTTCCACGCTAGTTTCTAATTGTAGAATGGATATTGTGAGTAACTTGTATTGGTCCGAGTTGGAAAATTTTCCGAGCATTATATAATTGTATAATTCATGTNGCNATAATAGCATATAAATTCACGAGAANNNNAANNATAGAGCGCAGCCTTG…
Gma.5843.2.S1_x_at	BE824014	At3g12390	5e-67	Protein Synthesis			TTCAAGAGTCCAACGTCTGACACGTACATTATATTTGGGGAAGCCAAGATTGAAGACTTGAGCTCACAGCTACAAACTCAGGCAGCAGAGCAATTCNNNNCNNNNAATTTGAGCAATGTTGGATCAAAGCCTGAATCTTCTGCTGTTGCTCAAGATGATGAGGAAGTGGATGAGGCTGGTGTAGATCCCAAGGACATAGAGTTGGTGATGACTCAAGCTGGCGTGTCAAGACCTAAAGCCGTTAAAGCTCTCAAGGCGGCCGGTGGTGACATTGTTGCTGCCATTATGGAGTTAACTAATTAATTGTCTGGTTTGTCTGAATTTTAGAATGTGTAGCTATTTTTCTTTGTTGATTGAAATTTTTGTTTTCCTTGAATTTGAAATACTGGTTTCAGTGGT…
Gma.17229.1.A1_at	AW309443	AtCg01240	8e-14	Protein Synthesis			AAGTTCTGAATTAGTGGATGCTGCCAAAGGTAGTGGTGATGCCATATGTAAAAAGGAAGAGACTTATAGAATGGTAGAGGTAAATAGAGCTTTTGCACATTTTTGTTAATCCATGAACAGGATCTATATAGACACATAGACCCATGAATCCATACATTTCGATTGAAAAAGAATTGAAATTGATGAATATATCTCTCGAAACAAACGAAAAGGAAACGAAAAACAAAAACATAAATCATGGATCAATTAAGCCCTCTCGGGACTTGCTTAAGAATGAGAAAGAGGAATCTTATGTAAATACCACAG
Gma.3156.1.S1_at	BG239135	At4g36420	3e-35	Protein Synthesis			GTTGGCGCTAAGGTTTCCATGGAATAATAAGGAAAAGACAGGATGACAAACAAAACATGGCGTAGAGTTTTTTCTTCTTTGATCAAGTGTAGCAGCTTATTCCTCACACTCAAGTTATCTGCAGGTGATGGAACTCAAGGAATGCCTTGCCATAATTCAAAGCTGTTAACCTTTCTTGTATTTGAAAACTTTGCTGAGCACACTATGAAATTATTGTTATTTCTCCCTTACATAAGGCTCTTTTTGCCTTGAATTTTCTTGATCATTTCTTAACCAATGTTGTAAAATTGGTTTTTGATGGTGGAATCATTTTTGAACTAACATACACATGTTACTAGCTGCTAAAGTTCTAGATCCAATTGGTTGTCCACTGAACTACTATGACCACACAATCATGTG…
Gma.13644.2.A1_s_at	CD402597	At1g78630	1e-05	Protein Synthesis			CCGTTGAGTTGCCAATAAGGGATAAGAGAATACATTTGCAGAAATAGGTCATAGGTGTAGCAGAGAACATGGAATGAAATATGAAAATTTTATGTCTATCTATTTCACAGAACTTCGAGTTTCCTGCTTTGGTTGCTACCTTGCTGATGTTTCCATTAAATGTTTATATTGTCTGTAGAGGTAACTGATTATTGTGTTACTTGTTTTTGTCAAGGTCCTTTGTGGAATCTTCATAATATTTTTGTTGTAGATTTGAACCTTGCCATGCAATATTTTT
GmaAffx.61596.1.S1_at	BE823654	At1g07830	7e-50	Protein Synthesis			AAAACAATATGCCACTACAGCAGCTGCTGCTNNNNGCAGAGAAGGACACAACCCCCTTCAGGAGTTNTTTGAGGCAGACAGGAGCCCTGANGATGACAAACCTGTTGTTTATGGTCGGAGTTGGAAGGCGTNTGAACTGCGTCTGAAGTCTTGGGANGACCTTCATAAGTTGTGGTATGTGTTGTTAAAGGAAAAGAACATGTTGATGACTCAACGTCAAATGCTTAATGCACAGAACCTGCGTTTTCCTAACCCGGAGCGCATCCCTAAGGTGAGGAAGTCAATGTGTCGCATCAAGCATGTACTTACTGAGAGAGCAATTGAAGAACCAGATCCCAGGAGGTCTGCTGAGATGAAAAGAATGATAAATGCTCTTTGATGACTTAAAATTGACCTGTT…
Gma.16034.1.S1_a_at	CD403617	At5g20180	7e-19	Protein Synthesis			GGAGGGTGGGATTGGCCTCTATTCTGTCTATGAAGTAGCAAAAATAATTAGTAACCTCGAACATTACGAGTAATAAGTGCGAAGAGATTGATAATCAACGGTTATGGATTNAGGCCTCCATCTTGCTCTTGCCTTTCTTTGTATTGGTTGATGAAGATTTTTTCAAACTTTTTTTTTGTTTTGTGTGATATTTGATTTACATCACTCGGGGATTTTGTTTCTCCGTTAAAAATATGGTCAACAGATTGTAACCTCGTAGTA
Gma.11260.1.S1_at	AI759626	At3g12290	1e-124	Secondary Metabolism			GTTTTATCCACACTTTTGTTTCTGTTTAGGTAGATGAATGTATTCTACAAAATCACAAGGATCGCTTTCGATGGATAAGTAGAACTGGTCCAATCGAAACTATGTATTTGCCCTTTCACTATCTCCGAAGAAACATTCTCGATGTGGGTACTGACCATATTTTAGATTGGATTTAGAGCATAGCTATTCCTTGGTGGTAAGAAACGCTTGTAGCCAGTGTAAGATCAGTTCTAATGT
GmaAffx.58294.1.A1_at	BE822389	At1g74010	1e-24	Secondary Metabolism			TCAGGCACTACAAAGCAGCAGAGACCAATCCGGGAGCCTATTCTCACTGGACCCAAAAACGAACCAAACAAGAGTGTTGATGAGGGGTCTTGCATTGGCATCTGGGGTGGCAGTAAGCAGAGACGGGTCATTTGTGCTTGTTAGTGAATACTTGGCAAACAGAATTCAGAGATTTTGGCTNAGAGGNCCAAGAGCAAATTCNTCTGAACTATTCTTGCAACTNACNGGNAGACCAGACAACATTAGNAGCAACCAGAGAGGTCAATTTTGGGTGGCAGTGAATGGTGNTTTAGGACCAAATCCACCTCCTAGGCCCACTATTTTACCTGNTGGANTCAGAATTAGTGAGAANGGTNTCATTTTACNGATTNTNTCTCTTGTCNAGGANTTTGGTAGTGA…
GmaAffx.72774.2.S1_at	AW164811	At1g17020	3e-12	Secondary Metabolism			GGGTGTCTTTCAGGTGATGAGCAATGGGATATACAAAGCGCCAGAGCATAGAGCTGTAGTAAATAAGTTAAAGGAGAGGTTTTCAATAGTGACATTCTGCTATCCAANCCCTCATATGGACATTGGACCTGCTGACAAGCTTACAGGTGAAGGAAAAGTAGCTGTATTCAAGAAATTGACACATGCAGAGTATNTCNNNNNNNNNNTCNNCAGAGACCTTGATGAATCGTTTATTGATAGTCTGAGAGTATGATCAATGATGTGTTTTGTGCATCATTTTCAATGTACCATTCCTATATCATTTCCTTTTTGTATAACATAATTGCGGCACTGATAGGACGGGCCCAAAGATTATATAGGATGGACTTAGATATTTATAAATTATAGTTTTTATTTATG…
GmaAffx.75675.1.A1_at	AW351172	At2g37040	5e-26	Secondary Metabolism			AGAGATAGGGTTGCTCACCGGAGAAAAGAATCTCTCACCCGATGAGGAATTTGAAAAAGTATATACAGCCATGTGTCAAGCAAAGATTGTTGACCCAATTCTGGAATGTCTTGGAGATTGGAAAGGGTCTCCCATCCCAATATAATTAATGTGTAGGAGTAATCTGCCGATGTTTGACAATAACTAGCAGGCAACTTCTTTTTTCATGATG
Gma.556.1.S1_at	CD392721	At1g75260	2e-07	Secondary Metabolism			GGGAATTCCAACATCAACGTTGACGGGGTTGAATCCGAGGGTTCGAGTGCCGAGGAAGGGACTGTGAACAAGAAGGATAAGAATCAGAAAGGTACGAGTTCTTCTTCGTTTCCGATGTCTGCGTACATGAACAGCAACGTGCAGTGTGTGAACAACTCGCTGCTGTACCACGCTTCATGCTCCCACCACGACCCCGGAGTGCGCCTCTCTCTTTCCAAGAAACCATTCGGGGAAGGTTTCCATCTCAAGGAACACGCTGATTCCAAACATATATAGTACTAGTGTTGCTTCTTTTCTGTTTTCTGGCTATATATTGTTGGAGAAAATAAAAATAGGTGGAGTGGCCAACTTGGGGGCATGGAATGATTCTAATTCTTGTGCCTGTGCTCTTCACTGCCC…
Gma.4611.1.A1_at	BE440300	At4g38460	2e-73	Secondary Metabolism	GA Biosynthesis		GGGAACGGGTCTTTCCTCTCTACAGTTTTGTGGATTATGCTTTTGATAGAAGTTTCAGTGTTGATGATGCCAGTGGATAACGGGTGGTTCTTGATATTTATATATTTATAGTTCTTTGATTGATCGACTGACTACTTGATAATCGATCATTGCATTGCATANAGAACTTACACAGTTTAGAAAACGGTACTGCNNNTCTATACAATCAAATGAATCATCCTCAGCATTTAGACTTTACCGTTCTTTTTGTGTTGGATATCTTGACCATTTACAGAGATGAGGAAGTTCTGAAGCATGGACCCATAAAA
GmaAffx.42116.1.S1_at	BQ081473	At5g13930	3e-23	Secondary Metabolism	Flavonoid Biosynthesis		GTCACTGTCTAATCATATATATTGAGCAAGAACACAGATCCTTCTTTTCTTCTTATGTATTATTGCTTTTTTAGTTTGAAAAATGTATTCTTTCTCTTTTGCTTTCTCACATTCTTCTTTTTTGTATACCAGT
GmaAffx.42116.1.S1_x_at	BQ081473	At5g13930	3e-23	Secondary Metabolism	Flavonoid Biosynthesis		TTGTACTCCGCAGTGTCACTGTCTAATCATATATATTGAGCAAGAACACAGATCCTTCTTTTCTTCTTATGTATTATTGCTTTTTTAGTTTGAAAAATGTATTCTTTCTCTTTTGCTTTCTCACATTCTTCTTTTTTGTATACCAGT
GmaAffx.93245.1.S1_s_at	CF808970	At3g55120	8e-44	Secondary Metabolism	Flavonoid Biosynthesis		TTTTTCTGATCCCTTATCTTAATTAATTTAATCACCAATGGCTCGTTCTATCGCTAACGCCAAGACTTTCTCCGCTCTCGTGCTAGACGGATTCTCCAACACTCTCACCAGACGTGGCTACTCTCAAAGCGCAACAAGGGGNAGGAGTTGCCTCCATAGCACCCAAATCAGGGGAAGACAAAGGTGTCTCATCATACAAGGTTTCCTGGGTGCCAGATCCCGTCACCGGTTACTACAAACCGGAAAACATCAAGGANGGTTGATGTTGCCGATTTGCGTGCTACCCTTCTCCGCANAAAATTCAACAACTAATTTCAACAATTTTAATTTTTTACCAAACCTTGNGTGATTGATTCGTTATGGAATTAATTTTGATACTCATATGCTCTGCCCACCTTC…
Gma.3591.1.S1_x_at	BE440266	At1g05010	1e-112	Secondary Metabolism	Ethylene Biosynthesis		GAGACAAGCCAAGTGTACCCGAAATTTGTGTTTGATGATTACATGAAGCTCTATGCTGGTCTCAAGTTTCAGGCTAAAGAGCCAAGGTTTGAAGCTATGAAGGCCAATGCAAGCGTGGTTGATGTGGGGGCCATAGCCACAGTTTGAGTCTCAGGCTCTCAGCATGTGGAAGCAACATGGGAACGGTTATGTGTGTTTTCTGTTAATAATAAACAAAGGCTACTCAGAACATATTAGTGTTTGGTGTCCTTGGATAATTGGCATGGAAGCTTGAGCTTGTGCAGTATATTAAAACCTTAAAGTTTAAAATAAAAGTATTAATTAGGTTGATCTTAATTNNTGCGTATGATCCGTGATATATATGATATGTTGTCGCCTGTG
Gma.3085.1.S1_at	CD402509	At2g16530	2e-29	Secondary Metabolism			AATTCCTCATGGTGATTGGTTTGAAATTGTCTCCTCTCCACATTATCTGTCTGAAATCGTTATATACGCTAGTTTTGTGGTCGCTACTGGAGGATCCAACCTAACAATCTGGCTGCTTTTTGTTTTTGTGGTGGCAAATCTGTCATTTGCAGCTGTGGAAACACATGGCTGGTATCGTCAGAAATTT
Gma.910.1.A1_at	BE659128	At1g24360	4e-08	Secondary Metabolism	Enterochelin Biosynthesis		AATCCTTTTACCTTGCAACATGAGCTTTTGCACTTTTAAACTACTTCTGTACGGTGATAGTTTGTTCTTTGCTGAGTTTTGTTTAAGCTAGTTTTACCCTGTGATTTATCGTAGAATATTAGTTGAAATGCAATTCAGTCACTTTTGGCACTAGCTCTGAATTGCTTACTGATGAAATGCAATGTGTCCAGCATCTTGTACCATTTTGGTTTTTATGGTCATGTNAGCAGAATAGGCATAATTCTTATATGCNATTCAGTCACTTTTGGCACTAGCTTTTCCTTCTTGGATGTTCTTTCAGGGAACTGTCTCATTTAAGCAAGCATTATTATGTTTATTTTCTGGTTTCCCGAAAAGNNGTANGCTTTTAGGCTTCCTATCCGAATTACTAT
Gma.17202.1.S1_at	BI972481	At2g45300	2e-31	Secondary Metabolism			AAAACAGTGAGTATATGCATGGCTTGCTTTTGTTTCTTAACATTCCCTTGTAAGAACTTGAGATAATTTGTATTGTTGGAAAGAGCTATTGATTCTGTTGTATCAAAGTAATTTAATTTCCAGTACAGACTTGGCTCTATTCCTCATATGTGGTGGTGTACATTGCATCTNTGCATTTGATCCCATTTCTATTGGGATAGGACCATACCTTTTT
Gma.4295.1.S1_s_at	AF488307.1	At3g25570	1e-134	Secondary Metabolism			TATGCAAGCTTCGAAACTGTTGGTTATGACTTCAAAGCGGTGAATCTGAACGAAATGGTTCAGAGGGTATTGGCATGTTTCCTCCCAACTGAGTTTTCTGTTGCAGTTCATGTGGATGGTGCAAGCAAGTCGTTTGAGCAGACCTGCTTTCTGGATGTTAAGGGATACTGTCGTGAAGAGAGGAGCCACGAAGGGCTTGGAATGGGTGGTTCTGTTGTCTACCAAAAATTCGGGAAGACTAGTGACTGTGGTTCACCTAGATCAACTCTAAAGTGCTGGAATGAGGAAGATGAGGAAGAGTAGTTTCCTTAAGTGTCTTTATTATTCTGTCCTTGTGAAAATAAGTCTGGTTTTCCAGATACGTTATTGTTTTTCTTTGTTGTCTTTTTTAGCTTCTGT…
GmaAffx.90530.1.S1_s_at	CF806255	At1g76680	4e-43	Secondary Metabolism			GAGTTGTTTTGGCACCGCTGACCAGACAGAGGTCTTACGACAACGTCCCACAACTTTATGCCATCCTCTACTACTCCCAGAGAACTTCCAACGGAGGCCTTCTCATTACTGAAGCCACTGGCGTCTCTGACACGGCTCAAGGCTATCCGCAAACCCCTGGCATATGGACTAAAGACCATGTTCAAGCTTGGAAACCCATTGTCGATGCCGTCCACGCCAAAGGCGGTGTTTTCTTCTGTCAGATTTGGCACGTTGGAAGAGTTTCAGATTC
Gma.5111.1.S1_at	CD393948	At5g63400	5e-15	Signal Transduction	Unclassified		AAGTGCTGTCTTAAAACATAGTTCATCTTTTGATCTCGGGCTTGAACNGCNATTGTTTTTTTTTTTTTTTGGCTATAGGCAAACTTTTGTTGCCCATTTGATCCTCGGGCTGTTCTCAAAC
Gma.6092.1.S1_at	BI968757	At5g14250	1e-34	Signal Transduction	Unclassified		AGGAAACTTACTGCGACAGACGAACAAATTTCATGCGATCAGTTGTATTTGTCTAAGGCTGGAAGAGAGAGACAAAGATATGACTTTGATGACTTTGACGTTCCACAAAAGTTCAACATTTAAGGGGCTAGGAATGATGGAAGTAGATCTGGTTATGGTCCATCACCCGTTTCCTTTATCTTTTGTTATTCCTGGTTCTGAGAGTGGGGGAGTGTTTTATTTCAGTCCCAAATGGAAGAGTGCTTGTTCTGAGGATGTTGAATTGTCTCAACTTATTAACTATA
Gma.9902.1.A1_at	AW395328	At1g02090	6e-09	Signal Transduction	Protein Kinase		CGACATCGACTTCAGAGGGCATGAGGAGATCTGCTCTGAATCTGGTGGAGTGATGGATTATGAAGAAGATCGAAGCCGACCAAAGAGGAGGCGGCATCCAATTTCTTGAAGATTTANTAGATAAGGGAGCTCATTGGAGATGGGTTCTTTAGTTGCTTGCCTGACTTTTATTCATGGCATGCGTCAACAGAGGATATCAGCTTTTGCAGACAGACAAGTATATCTCATCGATATTGCCCTTGTCTGTCACACCACAAAGCGAGATAGGGACAAGGAAAAAAAGGAGGGAAAACCTGTTAATTTAGGAAATTGATAGTGTTTCTTGAACCATTATTTAATCGTCTACTGAGTTGGCAATAACAAGCTGAGATGGTGGTGCGGCTATTTATTTGCGGTTGC…
Gma.2729.1.S1_at	AW396742	At1g71230	1e-135	Signal Transduction	Unclassified		ACTCTTAACAGTAAATCTAGCCTTGTATTTTGCCTCTTTTTTTCCCTCGCGCTGTGCATATTCTTGTTTTATTTCACAAGAGTATGCATGTACTGTCAACCATGCAGTGGAATTCATCTAACAGAAAC
Gma.662.1.S1_at	CD409953	At1g70670	3e-68	Signal Transduction	Calcium Binding		TGGGTACTTATTATCGTCCGTTGCTGCTATTTTCATCAATGGAGGTNTCAGTCANAAAACCCGCCCGGGAAAGTTTCCTTCAATACTGCTACCAATTGAAGTTCAAAACATCCATAGAAGCAAGCATGGAAGTGACTCTGGTGTCTACGATAGTGAAGGAAGGTTTGTTCTTTCAAAATTTGAAGAAATTTTCAGCAAGCATGCTCGAACACACCCAAATTCTTTAACATCTGATGAATTGATGGGGATGCTTGTGGCAAATAGAGTTCCTAANGATTACGCTGGATGGCTTGCTAGCTACACGGAGTGGAAGATCCTATATGTTCTTGGCAAAGACAAGGATGGTTTACTGCACAAAGAGACTATTCGAGCTGTTTATGATGGAAGCCTCTTTGAAAA…
Gma.4443.1.S1_at	AW348382	At4g28540	2e-24	Signal Transduction	Protein Kinase		TAACTGGGAGCCGTCCATCTGGTGCTCACAGAGTTCAACCAGTGTATGACACCAAACAAGCAACTTATACGCATGGTGGCTCTATAAGAGGCCGTGATGATCCTCTGCGGAACTTTGAGCTCCTCAATATCAGGAAGTAATTAAGTAAAGGTTGTGTCTTTTTGTTGTTATATTCTGAATTATGACACTCCTGAGATGCAAGATCACCTTTTATTCAAGAATAGTCTCAAGCATTATGGAAAGAAACCCAAGAGTTGAGGTCATAATGGCATGATCTCCTGATATCAGTTTTGGACAAAGGTGGACTTTTTTCTGCCCCCAGAATTGTTGTTTCACCAGGTTTCTCAGCCACTGTAGCGTGTTCTTAAGACGTGCCGAAGAGAATTCAACTGAAATTCT…
GmaAffx.33050.1.S1_x_at	BE022504	At3g10190	9e-25	Signal Transduction	Calcium Binding		AATCCCTTCTGTTATTTTCTGTTTGTTATTATTATTTTATTAATTTTTTTTCTCTCTTTTAATTTGGGTGTAAAATTTTCAAAGGCGAATGTGCAAATCCACTGAGAAAATGCGTTCTGAGTTGAATANNNNAANNANNNANNNNANNNNNNNNNNCNAGAGAAAATATCTGAATATATCTAACGTGGCTTTAAGCTCTGAAATTAATGTATGTGGCAACAAGCAGAACCCCTTTCTGGAAAAAAAAAAAAAAAAAAAAAAAAAAAAAAAAAAAAAAAAAAAAAAAAAAAAAAAAAAAAAAAAAAAAAAAAAACCTCGGGGGGGGCCCCGGTCCCCAATTCCCCCTATATAAATTCTTTTTACCCCCCCTCATTGCCCGTTTTTTTACAACTTG
Gma.1965.1.S1_at	L01432.1	At3g43810	9e-77	Signal Transduction	Calcium Binding		GATGGCCAAGTGAGTGATCATCACATTATGGCCACAANAACCTAAATGAAGAANTGTTGATTAAAAGGAAANGACCAAAAAAACAGNGGTANGNGGAAGGNCAAGGGTTTGGGNNGTATAACAGTGATGTAGTAGTCCTTGNCCTTTCTTCTTCCTACATTTNTATTTGANGGTTTTTGAATCCAACCTTAAAATGTCAATTAGTGGCAANTCCTGCTACTAATGGNTGTAGTGGAACTGAACCTTCTTAGTTTGTCTNGTAATTTTNTCCAAGAAATAAAGGGTTGTAATGTTAATGTCNCTTCNCNTTCTNCCNCTCANNNNNNNNNNNNNNNNGATGACGAATATTGTGATATTTGACATGCATCGTAGTTTATTTGAAAAGTC
Gma.1965.1.S1_x_at	L01432.1	At3g43810	9e-77	Signal Transduction	Calcium Binding		GATGGCCAAGTGAGTGATCATCACATTATGGCCACAANAACCTAAATGAAGAANTGTTGATTAAAAGGAAANGACCAAAAAAACAGNGGTANGNGGAAGGNCAAGGGTTTGGGNNGTATAACAGTGATGTAGTAGTCCTTGNCCTTTCTTCTTCCTACATTTNTATTTGANGGTTTTTGAATCCAACCTTAAAATGTCAATTAGTGGCAANTCCTGCTACTAATGGNTGTAGTGGAACTGAACCTTCTTAGTTTGTCTNGTAATTTTNTCCAAGAAATAAAGGGTTGTAATGTTAATGTCNCTTCNCNTTCTNCCNCTCANNNNNNNNNNNNNNNNGATGACGAATATTGTGATATTTGACATGCATCGTAGTTTATTTGAAAAGTCAATGTGTGATAT…
GmaAffx.66511.1.S1_at	AW350917	At1g18890	0.001	Signal Transduction	Calcium Binding	Calcium Dependent Protein Kinase	GCTCACTTCAGCTTCATGACGATATTAGTGGTCAAGCTGAAGTGGTTTGAGTCCGAAATTGTAATCTTAGTGCTCACTCAGTTTCTCATCTTCCTTCACCACTTAATATGCTTGAAAGCATAGTTTCTTTACTCTCCTTGAAAAAGCAAGCAAGTTTAGTGTTGGAGCATTTTGAAGCATACTGATTTACCTTGGGTTGGAGTTGGGTTGCTTAGGTTTTGGATTNGATGTTATTAGATGCCTGAAGCTTGAAGCATGCGTTGGATGGTTGCATACTAAAGTCGTTTTATAGCTTGTCAGCACAAGTTGCGCGGGCACATGCTGCAGGCCTCAAAATGTCACATTCATTGTATATCTTTGTCGTGTTGTTCTTGTTTTGATAATTTCATTGGTAATTGT…
Gma.8547.1.S1_at	CD410865	At4g21940	3e-23	Signal Transduction	Calcium Binding	Calcium Dependent Protein Kinase	GAATTGGAGACTGCTATGACCCAACATGGAATGGGTGATGAAGCAACAATAAAGGAAATAATCTCTGAGGTGGATACAGATAATGATGGGAGAATAAACTATGAGGAGTTCTGTGCAATGATGAGAAGTGGAATGCCACACCAGGGACAGCTACTTTAAATCCACTGAATTATCATTAATAATTCATAATGNAAGCCGATCGGTTGAGCAGTGACTTATTATTGTTGGGAAAAAGCATTATCTCCAGGAATGTGNNACAGGCCACTTCATGCATCGATGATTTCTATGCAATCCCAATTTTCGTACTAGGTTGCTATTGTGCCTGTCATGCTAAAAGTGGATTTCTTGTTCTGTACTTCT
GmaAffx.73451.1.S1_at	BG046889	At3g47480	0.0002	Signal Transduction	Calcium Binding		GAGAGTTGAGATCACATCGGAACAAAACTTGGAGAATTATTACAATTTACAAGGTGACAAAAGTGCATGGCATAGATTTTTTTTTATCTGTATAAATCAAGGTACCAGAGAATTTATAACAACTCAGACACTTTTCTCAATTGAGACCTCTTGGTAAATGGTATGTCATAGATAAAGCTACATGCGTGCTCAACAAAGTTCTTATTCTCAATCTCCCTTAATTATGTTGGAACCTTTCGCTACTTGCTTCACCTTTCTTCATAGGAAGACCAAATTCTTCCTCAACAAACCAAGAATCAAGGAGATGATGGGTGCATGCTGCAAGAGAAGACAATCCAACATAAAATTATTCTCTTCAAGTTCTGACCTGTCAACCTCTTCTTTCCTTCACATGAAGCT…
Gma.4487.1.S1_at	BE022586	At4g26470	1e-31	Signal Transduction	Protein Kinase		CATCTAAATATCTGACTGCCTCTTCAGCCAAGGCAAAAGGGTTTTTCTGGTTTTCCCTTGCAATAAAGGCCAAGTTGCTGCACGTTGAATTTTAAAGAAACTGTCATTCCTGAAGTTCGTTATGTAAATAGTAAGTGTAGAGCTAAGTGCCGTATTGAAGAAATGTTCAAATTTACGGATTAAATGCTACTACCATAGTGATTATGTATCGGTTGCTGCTTCTTTCTCTTTCTCGCTTAGTATTCAATTCTGCTATGTATTGAACTATAAATAGCCTGTGCTAGTGCACTACAATAATGAGAGGCAAACTGGCAAAGTGCATATCTACTCATTAAGTAGTTTAGCCCTTCCTAAAGAGCATATATATCTACATGTGATGAAATGGGTTAAACTAGCTAG…
Gma.11291.1.S1_at	AW351207	At4g08170	5e-49	Signal Transduction	Protein Kinase		AAACTACTTCCCTGGATATGGCAAAATGCCAGAATATGAACATATATTTACAGACTTCCTGTTGAGCTTGGGGCAGGGGAAGTACAAGAAAAAATAGGCTAAAATAACTGTTTCCAGCCCTTTTATTTATGTCCCCCACATGACGTAAGCCCCNTTGCCTCTCAGTTTGAAGCTCAAAACTATGGCTGTAGGAAAGTATCTTAGAAAGCATTAGTGATAATAACTTTTTCAGTTATGCTGTGTGATGGAAGTGCCATGGAAAACTATCAAGACTTGTGTTTCAGGAACTTCGACCTGTACAGAACAACTGCTAGTATTTTATTGTGCGGGAACTTTCGGCTGTCCTTCCAAGGTAACAAATGCTGTTGCAAATCCTCTGAAGTTCTATAAGCTGGTAGC…
GmaAffx.64402.1.S1_at	AW317282	At1g53440	3e-27	Signal Transduction	Protein Kinase		GTTTCTGACTAACAATTCTCTAAGTGGACNAATTCCTGATTGGATACTGAGCATAAANCANNANATTGATTTATCTTTGAACAATTTCACANAGACTTCNGCAANTAATTGCCAAANGNNGGATNTGAACTTAGCTTCNAGCCTCTCTCGCNCAGCAANCACTNCAATANNTTGTTTGAAGATGGGCCAACCTTGTTCAGGAAAACCCCNNTTTCATTCACTGTTCATAAACTGTGGAGGACCTGAAACAAA
Gma.7673.1.S1_at	BM307069	At5g58300	2e-42	Signal Transduction	Protein Kinase		GATGATATGGTTGATCTCCCTAGGTGGGTTCAGTCTGTTGTTAGGGAAGAGTGGACGGCCGAAGTTTTTGATGTGGAGCTAATGAGGTACCAAAACATTGAAGAAGAAATGGTTCAAATGTTGCAAATTGCCATGGCCTGTGTGGCAAAGATGCCAGATATGAGACCTAGCATGGATGAAGTAGTGAGAATGATCGAAGAGATCCGGCAATCTGACTCAGAGAACCGGCCATCTTCTGAAGAAAATAAATCTAAGGACTCAAATGTTTAAACTCTATAGATTAACAGTGCCTTTCGCTTAACCAGGAAGTGACAATAAAAGGGTATATAAGAGTGCATGCTCGGTCACCTTTCTGTCCAATTGTTCAATATTTCTCACAGATGTTCCTTGAGTTATTTT…
GmaAffx.21787.1.A1_at	AW348555	At5g61480	0.0002	Signal Transduction	Protein Kinase		AAATTGCTTGATGGTGTTCTAGGTCGATGTGCTGGGGACAATGTGGTTGTTGGTGGTGACATTCCTTTGCCACAAAAGCCAATTGCGGATCAATGTTAATGTGTTTATATGATTGAAATGATTTTTCTTTTTTTGGATATTTTTCTTATTGTGGGGGATTGGTATAGGAGAATCATTTTCTATTTTACTTTCAATGGAATTTCAAGTGTTACTTGTTCTAGTTTNNNNTTCTCCAGTGACACTAGTGTTATGACTCTTGTGTGCTCA
Gma.16710.1.S1_at	AW348493	At4g29810	1e-132	Signal Transduction	MAPKK		ATGGCACATCCTTTTGTCAACATGTATGATGACTTGGAGGTGGATCTTTCAGCTTACTTCTCAAATGCAGGATCTCCTCTTGCAACCTTATAAAAGTTTCCCTGCTTGCAAATGAGGAGCGTTTGCAGATGAGTTGAAGAACCAGCTCCTAGAGTCACTTCAAGGATTCTGTATTTAGTTGTTGAGTGATTGAGTTCAATTTGTTGAGAAACTCAGATGCAAGGGTCAAGAAATTGCAATAATTGACATTTGAAGAACTTTAATGCTGAAGTTAAGTATCAGGGGCTACTTGCAACAAAATGTTTGAAATTTATGATTGCAACAAAACGTATCACTAGGATTTGCCTGAGTTGCTGATAATATGATCTGATGTACAAATTTTCATGAGATGAAAGTTTT…
Gma.11182.2.S1_at	BU080899	At3g21220	1e-54	Signal Transduction	MAPKK		CTCTTCCCTCCTAGTATGATGGATCCTTCNACATGCCTATTGNCTATTGCCTAGCTAGCTAGCCCTGTGTGCCGCTTTATTTTCATTTTCATTTTCATTTTCATACAGAATCAAATCTTAATATTGGATTTTCAGCCATACATTACAGTGTTTTTCTTCTTACCATAANANNNNNNNNNNNNNNNNTCCATTCTTTTTCTCTTTTAGTATTATTATCTTTTTCAAGCCCCCTCAGCCTCAGTCCCTGGTTATTATTGTTATGTTATGCCAATTGCCCAGTGAGTAGTACGGTTATAACCTGCAGGTGCCTTTTCTTTCTTGATTTAATCATCTTCTTATTTAGAGCTACATCAC
GmaAffx.50980.1.S1_s_at	BE823095		0.002	Signal Transduction	Protein Phosphatase		AGGCATAGTTCGGATAATGTGAGCGTGGTGGTGGTTGATTTGAGGAGAGATCAACGACAATCATCAAACTCCAATTAATTAACGTTGGNGAGAAACAAAACCAAAACCCTTTGTTTTCAGGACTTCGTTAAGAACGGGAAGACCAAATCAGAGGGAGGAGGGGCTTGNGGCTTTTGCTTTATCAAATGTTGATTGTAATGTAATGGGATTTTAGGTT
GmaAffx.50980.1.S1_x_at	BE823095		0.002	Signal Transduction	Protein Phosphatase		TTGCTCCGATGCGTCGATTTTGTTAACCAAGTTAGCGTTGGCGAGGCATAGTTCGGATAATGTGAGCGTGGTGGTGGTTGATTTGAGGAGAGATCAACGACAATCATCAAACTCCAATTAATTAACGTTGGNGAGAAACAAAACCAAAACCCTTTGTTTTCAGGACTTCGTTAAGAACGGGAAGACCAAATCAGAGGGAGGAGGGGCTTGNGGCTTTTGCTTTATCAAATGTTGATTGTAATGTAATGGGATTTTAGGTTAAAAAAACAAAGGAGCAAGGAAATTGTAACTTTGGAA
Gma.4455.3.S1_at	CB063632	At2g02800	1e-72	Signal Transduction	Protein Kinase		GAATCTCAAAAACTACTCCTTCCAGTTTATCTATTCCATCATACAGTGAAAAAAGCAATGCCTCAAGTCTTCCCACACCAAGGTCNGAGGGTGAAATCTTGTCTTCTCCCAATCTTAAGCCCTTCACATTCAATGAGCTNAAGAATGCCACCNGAAATTTTCGNCCCGATAGTCTTCTCGGTGAAGGGGGATTTGGATATGTCTACAANGNNTNNATTGATGAACACACATTTACNGCTTCAAAACCNGGATCAGGAATGGTTGTTGCTGTNAANAGGCTNAAACCTGAAGGTTTTCAAGGTCANAAGGAGTGGTTGACTNAGGTTAANTACCTNGGACAACTGTACCACCCTAATCTGGTTAAATTAATCGGGTACTGCTTGGAGGGAGAGAACCGGC…
GmaAffx.56323.1.S1_at	BU764214	At1g73460	5e-20	Signal Transduction	Protein Kinase		GATAAAGATGCATGCTCACAGATAAAAACACACACTGATGGGAACTTCTCATTTTCTCAATCTCTTAGAGATAGCCAGATGATTCATGCTGGCTCCAGTAAGACCCTATGGTCGAGTAATTGTAATGTAGAAGCAGATGACTGTATGAATGCATTTGTGGGATCTGATGACATGCTTTCTTCTTGGAAGAGGAAGAGTAGTGATTCTTCACCTGTTAAAAGTTCTAGGGATGAGAATAATGCTATTGTGGTAAGATCCAGAAACTCTTCTCCAACTACAGTCTCGAATTATGGGTATACTGATGGAGAGCTTGTCAAACTAGA
Gma.13604.1.S1_at	CD401537	At2g40120	5e-37	Signal Transduction	Protein Kinase		CAACCCCAAAAGAAGGCCTACTGCAAGACAAGCACTGAGGCATCCATGGCTTTCCTATGTTTACTAGTTCTTTCTCTGGTGGAGAGTTCAGTAATTCTATTGGAGTTATCCTCATCAATCGTGATCTCTAAAGCTTATTTTCCCCATATAGCAAAGCTTGCAATCACAATTTTGGTTTGTTTATAAACTACACCAAGTGAATTCACTGTCTCATGCTGTATAATTTTTTTGCCTGTTGATTTACAGTTTGTTCTTTGTACAGAATTTCTTCCCATTATTTTTTTGCCTTCCATGAATTGGGAGGTTATCATAATAACATTTTAATGTCANNNNANTTGGTTCTAAGTCCTAACATCATGTCACATAATACAGGGGTTCTATGAATTCACTGGCTTTGGA…
GmaAffx.33721.1.S1_at	BI967195	At3g20860	4e-09	Signal Transduction	Protein Kinase		GTACACATTCTTTGCTCCACGCATAAAGAAGATGATAATGCGGTGGAGGTTGATCAGGCACCAAGAGGTGTNTCATTGAGTGTAATAACTGAAGTAGATGGTGATGAAACAATCAAGACTCCGGTGGATAGTCCCTGCCAGCAAAGAGCGGATGCTCTGGAATCTCTGCTCGAATTATGTGCTCAGCTACTCAAGCAAGATAAACTCGATGAGCTTGCTGGGGTGCTAAGACCATTTGGGAAAGAAGCTGTCTCATCAAGAGAAACAGCAATATGGCTGGCAAAAAGCCTCATGTCTGCCCAAAAGTTTAATGCTGAAGCCTAAGTTCTGGCCATAAATTTATACATTGTTGTAAGAAATGTGCATTTCAAATGTCACATGAGTTCCTTTCGAGATTTG…
Gma.5162.1.A1_at	BI971156	At5g24080	8e-32	Signal Transduction	Protein Kinase		GGTAAGACTGCTGGAAGATTCGATCGACATTAATATGCCACCAATGCCCCAAACAGTTGTAGAATTAATTGAAGAAGGCTTAGACCATGTATACAAAGCTATGAAAAGAGAGTATAATCAGTCCAGCTCATTCACTCTTACCAGCCATCTTACATCTCAAGCCACATGTAGCAATTCCACAATGTCACCAAGATAGTGTTTTAAACTGTAACAGTAAAAAATTGGTCTGATCTTGTACGTGTTTGCTGCCTCCACAAGCTAAGAAATTGGTCTTTTCATGTTATCTGGAAATTATATCAGGGGGAGGGGGGAATCATGGAAGAACTTTTTTTTTTTTATGCACATGTAAAGTTTACAATGTTTAAATGGCTCCTTTTATTTATTTTTTTGGGAGAAGTC…
Gma.8397.1.S1_at	BI321777	At1g09020	1e-105	Signal Transduction	Protein Kinase		GAAAGTGCTTTCTACACGGTGATTTTATCTCTCATTTCATTGTAATACAATTGGATTGGCCTCTTGCTTTATTGCCTCTTTTTAAGATTTTAGGCTGAGAAAGAGGCCTGTAAATTCAGAGTATTTGATTGCCCNAAATTTATTCATCTCTCCCCATTCGTATTATNNCTTCANAATGTATTGTGCTCCTGACATAGATACCAGCAAGGTGGGGGAGCACAACNTCTGTAATCATTCCCATCTGTGAAGATATCAAGTTTGAAGAAAAAAAATGAGGATGAAGATTGAAATAATGTTGTTTTATATTTGTTGATTAATAATCCTTAGGGTTTGATTGTTTACCTTAAGAACTTCAGCCGGAGTAGCTTATGAATAANGAACCGTTGCATATGAAGTTGT…
Gma.6290.1.S1_at	AW311265	At2g39660	3e-06	Signal Transduction	Protein Kinase		TCAATGAAAGTAGCCAACCTTGCCATTCAATGTCTGTCTGTGGAACCAAGATTTAGACCAAAAATGTATGAAGTGGTGAGAGCATTAGAGGAACTTCAGGATTCAGAAGACAGAGCTGGAGGGGTGGGAAGCTCTCGAGATCAAACTGCTAGAAGGAGTGGCNNNAGCTCAAGCAGCAGTGGGCCTAGACAACATAGAGGTAGACAACATGAAACAACAAGGAAGTGAAAAGTGAATGTTGATTTCATGCTGTGATCATCTGATTTTGCTAGAGTTGGTACATTGTATTTACGTGTATCATGATGAACTTAAGCATGGCTCTAGATGTCTGATTTCTGTAC
Gma.4264.1.S1_at	BE659253	At3g02750	0.002	Signal Transduction	Protein Phosphatase		AATAGCTCAAGTTTTGTACCATGTCTCTCCCAAGCCTTGCTGGTTTTATCGAGAAGGTTGGGTAAATTGTGCTGCAACAACAGTCAACAGAGAAAGGATCATTATTTTGATGATTTTTCGGTAGTTTTCTGCCAATATTCTTTTCATTATTTATCTTCCATTTCCTTCGACAGCATTTGAGGGGGGGGGGGGGGCGCNTNATNTATATTTCTTATCTGGAGGAAAAGGGGTACCGGGCTTTTTTTTTTTGTTGCTGGAGGTCATTTTCCTTCTCTGTATATTTGGTAGATTTGGAGTTTTTGTAGATCCAAGTCTCTAGATTAATATTATATAGTCTGTTCTGAAATCTGCCGTTTTTCATTTGCATCATTCTTAGGTTATAGTTTCCAATTTAGTCAG…
GmaAffx.34312.1.S1_at	AI965735	At2g25620	1e-05	Signal Transduction	Protein Phosphatase		CCACCAGCTCCTATGGTTGTAGAAAGGCCTAGAGTCAGAAGAAGCATATCTGCTGAGGGGCTTCAAAATCTTAAGTGCTTGCTAGAAGGATAAAATTTTCTACTTCTCGGCAACACAAATGATTCTTTTTGAGCTTAGATTATTATGTACATAAATTCATCCGTCACAGTGTTGCTGATCCCTGAGGGGATGTTGTAAGGAAAACACCAAGATGGCAAATTCAAATAAATTTCCTGTCATCGTATAATTATTTTCCCCATTGCTATTGCCTTA
Gma.6049.1.A1_at	AI440639	At3g62260	7e-14	Signal Transduction	Protein Phosphatase		GAAGCATTACGCCTGAACACATTCGACAATCTCACGGTGATCATTGTATGTTTCTCTTCCCTTGACCACGTGGAGCCAGAGCCATCCCCTCCTCGCCAACGGAAGTTGAGATGCTGTAGCCTCTCTGCAGAGGCTCTTTGTAGCTTGAGGAGCTTGTTGGAAGGCAGTGCTAGCAACTGAATGTATGTACAAACACGGTTCATCAAATAATGTGTTGTTGAGATTATACCACTGTTTTTGGCTGCTTCAGTTTAGACATTGGAAAAAGCAGCCATCATTTTTTTACGTGGTCGGTTGATGTACATATCCCGGGCTGGAGGATGGTGGTGTAAATATGTATTGTCGTNACATTATTATTTTGTACTAAGGTCAATTTTTGCTATGATNGCCACATTCATG…
Gma.8237.1.A1_at	AW309794	At1g69220	8e-13	Signal Transduction	MAPKKKK		AGGTCAATGGCATGGTTGTGTAACTAGTACCCAATGTTTTGCTGGTTGCTTTAACTATTTTTCCTAGTTTTGTTAAGTAAACCCTAGAAGATTTAGAGTTTTGTAAGCTGCCACATATTTGTATGTAAATAGAATATGCANNACTTTCGACTATTGCTGCATTTGCGCACACGTTGTAGTCACTAGTGGATTTGTT
Gma.11041.1.S1_at	BI970555	At3g62220	1e-162	Signal Transduction	Protein Kinase		TGATCATACACTACCACGTGGACAGCAGAGTCTGGTTACTTGGGCTACACCAAAACTCAGTGAGGATAAAGTCAGGCAGTGTGTTGATACAAGACTAGGAGGAGAATACCCACCCAAAGCTGTTGCTAAGATGGCNGCTGTTGCTGCACTGTGTGTGCAATATGAAGCTGATTTCAGACCAAACATGAGCATTGTAGTCAAAGCTCTTCAACCTTTGTTGACTGCACGACCTGGACCTGCCGGTGAAANNACCNAATTAATCTNTGTATCACTTTCTCTNNATATTTGTGAGTATGTGCACAAGTGTGCATGCAAAATATAANNNNNNNCTTCAGAAGCTGGTGGTAAATTGCTCAGACATGACTNTATATCCCATTGTTTACACTGCATTCATTTTGT…
Gma.4801.1.S1_s_at	BU548608	At2g39840	1e-108	Signal Transduction	Protein Phosphatase		ACTTGTTACGATATTTTCAGCTCCAAACTATTGTGGTGAATTTGACAATGCTGGTGCGATGATGAGTGTGGACGAAAACTTGATGTGCTCATTTCAGATTCTTAAGCCTGCAGAGAAAAAATCAAAGTTTGTGATGTCAAACAAGATGTGATGGTTGGCACATCACTGTCAANNNNNNNNNNNNNATGTATTCGTGGAGCTAAATTAAATCCTGAAGATTTAGATTGCATGGTCTTAAGTTCTATCTATTCTGAGGTGATGATGATGAACAAACAAGTTTACTGCTATAACATCCAGTCAGGCAGTGAGCATGAGGTACTACAAGAGATATTAAGCACTGTTGGATGGCCATAAAAGCAAAGGCTTTTATCTTTTTTTTTCTTTTCTTGTTTTATAATT…
Gma.5883.1.S1_at	CD396478	At1g50370	1e-164	Signal Transduction	Protein Phosphatase		CAACTCGTTCAGGAAGGCCTTAAGTATATGTTCCAAGATAAAGGCCTTGTAACTGTATGGTCTGCACCTAATTACTGTTACCGATGTGGAAATGTAGCTTCTATTCTGAGTTTCAATGAAAATATGGAAAGAGAAGTTAAATTTTTCACCGAAACAGAGGAGAACAATCAGATGAGAGGGCCCAGGACAGGCGTTCCATATTTCTTATAAGTTGGTGCAAATTTTNNTTTGAATTTATTGTAAAATTANNGNNNNACANTCATGTATTTATGCTTTGCCTTTTAAAGGTGGATTTTATTGGTCACAAGATTACCAATCAAACTATATCTTAGC
Gma.2064.2.S1_at	CD413690	At4g18710	2e-53	Signal Transduction	Protein Kinase		GAAGCGGCAAATAGGGCTGCAATTTGTTCNTCCNGCAGGATCATGATGATNAGCTTNAGNGGGGGCNTNAGTGTATACTAGTTGATAAGTTAAACAAAAGTGNCNCCNTTATTTTTGTCTAATTTAGCATGTTCTGTGGCCTGACCAGTGTAGTTTCAAGCTG
Gma.17889.1.S1_at	BM270487	At1g24450	3e-48	Transcription			TCCAGAAACAACTCGGGTACACCTTCAAGAGCATCGATCTTCTTCGTCGCGCCATGACACACGCTTCCTTCTCCGAAGAAAACAACAAAGCTTTCGCCATTCTCGGCGCCAGCGTCATCGAAACCTCCGTCTCTTTCCATCTGCTCTCCAGAGACGTTGATCTTTCTTCCAAAGAGCTGAACCGTCGATTGTCCCAAATCACCAACGTCGATTCCTCCTGCGCCGTCGACGGAACGCGATTAGGGTTGCACAAGGTGGTTCGCGTCTCGCCCAAGACAAATTCCTCCGCCCCCGCCGTCGTTTGCGGCGCCTTCCGAGCAATCTTTGGCGCTGTTGCTATTGACACCGGCAAGTCCGATGACGCAGGCAACGTTTTCTGGAACCTTCATGGCGGTGGTG…
Gma.9678.1.S1_at	CD404894	At4g14660	2e-72	Transcription			TTTGAAGATGCCTGATTACCGATATGTTCCTGGCGAAAACGCATGCTTCATGAATGACAAAATGTCAAAGATTGGAAAAGATGTCACGGTCCGCTTCTCGGTGATAGGTACAAAGTGGATGGAAGCAGAAAGGGAATTTCAGGCATTGGTCAGTTTGGAAGGGGATTATCTGGGACCAATTTCAACTCCGGATATTTAGCTACATTTTCTTTGTTGCCTTGTCTTCTGAAATGGATGAAATATTTTCCATATGAAGTCAGTTCTTGTAATTAATGATAACTCTGTCTGCCTTCCTTTTAGAACTGTGATTTCCGGCTTGTGTACGGGATACACTAGTGAAATCTGGGACCAATTTCAACTCCGGATATTTAGCTACATTTTCTTTGTTGCCTTGTCTTC…
GmaAffx.67609.1.S1_at	BG551013	At3g05060	2e-59	Transcription	Transcription Factor	Unclassified	GGTCAGGCAGCTCCAAAGTTCAAGGGGAAAATTTCNCGGTCACTTGCNGCAAAGACGGCATTGGCTATTAGGTGTGATGCTCTTGGAGATAGCCAAGATAACACCATGGGATTGGAGAACAGAGCNAAGCTTGAAGCACGATTGAGGAACCTTGAAGGCAAAGAGTTNGGTCGTTTTGCTGGTTCTGCCAAGGGAAAGCCCAAGATAGAAGCATANGACAAGGACCGAAAGAAAGGAGCTGGAGGACTGATAACCCCNGCCAAGACATATAATCCTTCAGCNGATTCAGTTATNGGGCAAATGGTNNATTCTGCTATNGATGAAGATGCACAAGAGCCTTCTGTTGCT
Gma.4434.1.S1_at	BE659015	At5g20230	1e-21	Transcription	Transcription Factor	Unclassified	GTTACAAAGGCCAACTTCGATGCTTGCAGCTCAGCCTCTCCTATTGCCACTTTCACCACTCCACCTGCGAGAGTGACCCTCAACAAATCTGGTCAACATTTCTTCATCTGTGGAATTCCAGGGCACTGNTTGGGAGGTCAAAAGCTTGCCATCAACGTCACCGGCAGCAGCACCGCCACCCCACCTTCCGCCGCGGCCCCCCCCACCACTCCTTCTAGCCCTTCTCCAGCCGGTGCTGTCACTCCTCCCCCACAGAACTCTGGTGCTGCATCTCTTGGAGTTGTTGGAGTATTTGCCACCCTGCTTTCAGTTGCCGCCACTTTTTTCTATTAGATACTCCACGAGATTATTCTAGTCAGGAGCTTGCGAGTCATCATCATCGCTCTTTGATTGTGTTTC…
Gma.15654.1.S1_at	CD401214	At5g15020	3e-20	Transcription	Transcription Factor	Unclassified	GTTCTCTAACATCTTCTAAAACAGCTGAGACTCAAATACATANATGTNNGAGTCTTGGTGTAGCAACCTAGGAACCCTTTGGGTTTACAATTTTATTTGTTGTCATAGTACTTGAATTTTCACATGAAAGTGGAGGAAGGGAATATAGAGATGGGAGTGTGTAATGCGTTTATGAGGTCTCATGCGTTTTGCACACTCCTTTGTAAATAGTTTGCTTCAATATATTTGTAGAAATATTGTTTACCAAATTGTTTATTAGTTGCAACACAGTTGCTTCCTCCG
Gma.16645.1.S1_at	BM143429	At1g01720	1e-108	Transcription	Transcription Factor	NAC Domain	TTGAATGTTCCGAAATGGAGGACGAGAAGCCGGAGATTCTGCCGCCAGATCCGCCGTATACGGCGGCGACGGTGGCGGATTGCCTGTACTTCGAGGCTTCCGACTCGGTGCCCCGGCTGCACACGACGGACTCGAGCTGCTCCGAGCAGGTGGTGTCGGCGGAGTTTGCGAGCGAGGTGCAGAGCGAGCCGAAGAGGGGCAGCAACAACAACAACGAGTTTGCATATAATTACGTGGATGCCACTCTCGGGAATAATCAGATGTCGCCGCTGCAGGATATTTTCATGTACCTCTCCAAGTCCTTCTGCAATTAACACGCACCACCACCACGACGAGACGACGTCGTTCTGTGTTGTGTGTATGCATTATGCATTTTTGCAGTAGCTGCTCCACTGCACC…
GmaAffx.34274.1.S1_s_at	AI938265	At4g24440	0.0002	Transcription	Transcription Factor	General	AAATTGTTGTCATCTGCTGGTACTATGGAAATGGTGGCCAGACCATAGTTACAATGGTCTTAAATTCTTGCCGGAACTAGCAACTACTGTATGTTATTATAGATTTAAAAGCCATCAGTCTTCATATCATTAGGTAATTAATGATGCTATATTGAGAATACCGCTTGGGAATTGGATGAGTCTACTCTCTTCTTTTAAGTGTATTCTGTTCTA
Gma.1772.1.S1_at	CD406036	At1g07470	5e-13	Transcription	Transcription Factor	General	CGCTTTCGTGAAATATGATTCGGAGGTGTCATTGTGTGTTTCATGATCCCTTTCTTTGATTATAATTATTAAGTGAAAGATTGATGAAGATAGGAATATTTTTACCCTTTCGANACTATTGTGATGTTGGCCTCTTGTACATAGAGAATGAGCAATTTTTTGCCTTTAACTGATGGTTAGAGACTCGGGCATTTCCTTTAAGCCCACCATTTGTCAAGTATGTGGTTTCTTTAGT
Gma.3176.1.S1_a_at	BU549115	At1g07470	5e-23	Transcription	Transcription Factor	General	AACAACGATAATGTCAAGTTTGCTTTTCTTGGTTCCAACATGATCTCTGAACTTTAGCCCAAAAAGTGAAAGAAAACATGACAATTTCAGGAATATGTTTTCTACATCAGCAACGTTCGTCATTTCTTGT
Gma.9124.1.A1_s_at	CD416907	At1g63490	1e-25	Transcription	Transcription Factor	Unclassified	GTATTCGAGTGGGATAGAATGTCTAAGGTGGCAAAATCGAAAGCCTTTCAGACGAGCAGCTAAGAAACGTGTTGAACTTCGAAGTCTTTCTCCATTTCTATGCATACAACGATAGCTAAACATAGGAGAAATCATTGGTCATTAAATTGATTCAAATGATTTTTATGGTGTCATCTCGGTCATTTTTAATCCATCTTAATGCGAAAATTCCATTTTTAATNNNNNNNNNGCATTTCACCANNNNAANNNTTGAGTTATTAGGATAAAGATGGCGTAAATTAACGTAGGAAGCATTAGTTTTATACAGCTGAC
Gma.1270.1.S1_at	CD405147	At1g10200	3e-85	Transcription	Transcription Factor	Unclassified	GTGACTGTGAATGGAACCCCTTACCATAAGAGTTGTTTCAAATGCTGCCATGGAGGGTGTGTTATCAGTCCTTCCAATTACATAGCACACGAGGGAAAACTCTACTGCAAACACCACCATGTCCAATTGATCAAGGAGAAGGGCAATTTAAGCCAACTTGAAGGTGACAATGAGAAGAGTGCAACTAATGGGAAAATCAATGGTGAAGAAGTTGCCACGGAGACATGATGAAAGAGTCGAGTCTCAGAATTGTNCTTTCTCAAGTTCCATATTTGTGCACCATATGTTTCTGCTGTCTCTCATGCTTTTACCATTACTTTGCAGTCCGGGAAGCTCTTTACCCGTGACAAATATGGTATTCAATTTTTTGTTAGTTGAACTGTGTGGATCTTCATCATC…
GmaAffx.89077.1.A1_s_at	CK605647	At1g56170	2e-26	Transcription	Transcription Factor	Unclassified	TTCTCCAGCTGATATGCCATATTACTATGTCCCTCCACAGCATCCTGTTGTAGGACCACCTGGGATGATCATGGGCAAGCCCATTGGCGCTGAGCAAGCAACACTATATTCTACACAGCAGCCTCGACCTCCTGTGGCGTTCATGCCATGGCCTCATACACAACCCCTGCAACAGCAGCCACCCCAACATCAACAAACAGACTCATGATGACTATGCAATTCAATTAGGTTGGAAAGTAGCCTGCACCTTTTGATTATTACAAATTTACTTAATGCCTTTCAGCCAGCTGTAGTTTAGTGTTGTGCATTGAAAAAAAGCAAAAGATTGTTTTGAGGTTTCTTGCACTCATTTATGATTGTATGAGCTCTTGTGATGAGTTACTTTTGGTTGTGTTTACT…
Gma.13614.1.A1_at	CD402000	At5g05830	3e-14	Transcription	Transcription Factor	Zinc Finger	GCAAGGCCATCGTTTCCTGAATTTTCTGCTTGCTTGTATAGTTTTTGCGTTTGTCATATCGTGGCTTTTTCACTTCAATATGCCCTCGTCGTAATTTTCTAAAGCCAAAT
Gma.7212.1.S1_at	BE658102	At1g30970	3e-36	Transcription	Transcription Factor	Zinc Finger	GGTTTATTGTTGTACTTTGTGGTCTATAATTACCTGCTGATCATTATTATCAATTTATCTTTCAGATGAGCTCCATTGATGCAGCCATAGATAAGAGGATNCTTGAGAGNAGGCTGGCTGGTCGTATGGCATTTTAGATCAATCTCATCCANACANTCTTGTNAAATTTCTTCAGTGATANGGGCTCAAAATGGNATTTTAATAAGGCTTTGACAGCGTGTGGTCAAGATTCCTTTATTTAAGGTCCNGNAAGTAANNTTGTTATTGGTGCAATTCTTTGCCAAAATGGGCAATGGGCCCTACGGTNATNGTGGAATCGAAGNAAAAATATTGAAATGGTTCTGATTTCTTNNNNCTTAGGAAGTTGCAAAACTTTGTTTATTTCTCANTTTCATACCT…
GmaAffx.24408.1.A1_at	BU548087	At2g45120	9e-42	Transcription	Transcription Factor	Zinc Finger	TCGTCAACGATCCAAGCGCAACTGGAAATCTACCATGCCCAAGCTCAGNNTCGGACACCCCGAAGCCGAACCTCTCAGCTCCGTCTCCGACACCTCCCCCGAAGAAGACCTCGCCATGTGCCTCATGATGCTCTCCCGCGACACGTGGCAGGAACACAAACTCGCCAATGCAGGTCCACCCAAGACTCGCTGCAGCAGCGGATCAGAGATCAAGCTCAAGAACAAAGTCCGCTCCAAGCACCTCTGCCACGCTTGTCACAAATCCTTTCGATCCTCTCGCGCTCTTGGGAGCCACAGAACCCTGTGCTCTCCCCGTCTGGAAGCCCAAAATAACAGCATCATTAGTAATAACAACATTAAGGTTTTTGAATGCCCCTTCTGTTACAAGCTGTTTGGTTC…
Gma.16613.1.S1_at	BU760651	At5g04340	2e-35	Transcription	Transcription Factor	Zinc Finger	GGATTCTTGTTTGCCATTGATTGAATCTAACAATTGTTTTCATCANNAGTAATATTTATGCCAAAGATAAATATACAGGTT
Gma.441.1.S1_at	AW156504	At1g31340	4e-45	Transcription	Transcription Factor	Heat Shock	AAGTGAAGACTCTAACTGGAAAAGAAATTGAAATTGACATTGAGCCAACTGATACAATCGACCGGATCAAGGAACGCGTTGAAGAAAAAGAGGGAATTCCACCTGTGCAGCAGAGACTCATATATGCAGGTAAACAGCTTGCTGATGACAAAACAGCTAAAGAGTACAACATTGAGGGTGGTTCTGTACTTCACTTGGTGCTTGCATTGAGGGGTGGTACTTATTAGTGTAGATGCCATATCAGAACCCAAAGACATGAAAGGAAGCTCTATTCCTGCCCCGTCTCTCTGAAGACATCATTGTTCTTTTATGTGCTTGGTTTTTGTAATTGTGGCTACTATTGGTGGTCAGTAACTCAGTATCTTTTTAGTTGTATGCTATTTAAAACCCTAAGTTGGC…
Gma.4322.2.S1_at	BM954531	At2g41900	1e-85	Transcription	Transcription Factor	Zinc Finger	GGCTGCAGAGTCACATGAAGGATATTCTATTTTTTCTTTTATAAAATAATTGTCATTCATTATTTTACTACATAGCTTCAGGAGAGCTGAAAAAGCTCTCTCCCTTGGGGCTGATCAATTAATAGTAGGCGAAAAATCCTATCGAGGTTATCTATTTTTCTTCCAAAACGGCCCCGTTTCAGGGTTTTCGCCCTTGCTATTTCACTAGAGTTCTGAGTTCACTTCACTATCAAGCAAGCTAGAGTTCTGAGTTCACTATCAAGCAAGCTAGTTTGGTTTATAATGCGACAAAAACCATTATTAGCCTGCGTTTGTTCTAAAGATTTTTCCGAAGTTCACCAAGTTAAGCCAAGTGAATGATTTGCTGTTTGCCTAAGGTTGAA
Gma.5076.1.S1_at	BE657174	At2g41900	7e-58	Transcription	Transcription Factor	Zinc Finger	ATACTGAAGCGAGGGATGGCTGCAAAGTACCCGAATGATAATCTATTTTTCCCCCCCCATTATTTTGTCATTCATTGTTTTACTAAAGAGCTTCAGGGGGAGTGGTAAGAAACCCTCTCTCTGGGGTTGATGATATCCCAGTAAAAAAGAAAATATTCTTCCAAAACTCTAGTTTCAGGACTCTTTTCTTCATTTTATTCCTAGCCATGGAAAAACCAAGAGCCTCATATTTGTATTCAAGTTCGTTTTCTTGGTAGGAATCTGCTAGTATATTGCTATGCTATTGCATGTATAGAAGACTAGAGTGTGTTTATTGTTAAGGAATTAGAGGTGATCTGCGCCATTAATATTTATTGCCGGCAGATCGTTTAGACATACTGAAGGCTACTGTGTA
Gma.16547.1.S1_at	BU545050	At2g47260	4e-46	Transcription	Transcription Factor	WRKY	AGGACTTTGTTGCTGCACTGGGATATTTAAGTTTTAGTTTTCATTCTCATCATGATCACACTTGTAAAACCCACGTTATCTTTTTGCACATATACTATATAATAGGCCTT
Gma.3996.1.S1_at	AW394946	At3g58710	6e-53	Transcription	Transcription Factor	WRKY	ACTTCGGGTGGTTCGATGACGTGACGTCCACCGGCGTCCTCGAAAGCCCGATCTGCGGCGAGGTGGATGACGTGGCGGTGCCGATGAGGGAGGAGGACGAGTCGCTCTTCGCCGATCTCGGCGAGTTGCCGGAGTGCTCGGCGGTTTTCCGGCGGATGAATATTCCGGCGACCAGCGCGATCCGGTGCGGCGGCATCACAGGATAACGCGGGTGGACCCGTTTTTCTTTTGTGTCGCGTCATTGCGTAGTGATTTATATTATATTCGCCGCCTGAAAGTCGTGCGCTATT
GmaAffx.6478.1.S1_s_at	CA939014	At4g31550	9e-06	Transcription	Transcription Factor	WRKY	CGCCGGCGGGACTTTTGCCGCTCATCCTGTTTAAGCGACGGTGGATATCGGGAAAGTATGGCACCGACAGAGATGAGTGATAACCGCCGTTTGCAATTAACGGGGGGGAAGTTGTAACCGTATATTGTAACAGTGGGAGGAAAAGAAAAAAAAAAAAAAAAGAAGGGAACTTATTGCAAGCGAGGGAAAGAAAAGAAAAAGAAGCAAAGTCAACTTTTGCTATGTTTGGTTTGGCTGGGACCT
GmaAffx.52970.1.S1_at	BU548330	At3g26935	8e-47	Transcription	Transcription Factor	Zinc Finger	GTGAGTTGTCTCCAGAAATTAGGACAACAGTNGACGAAACNAGTNACCGTGCCGGAATNCATCCCAGGAGATCCAGCTGGGGAAGAAAAAGTGGAAGCTGGGAAATGTCCCCTGAAGTTCTTGCTTTGGCAGCCANGGTTGGGGAATCAAATCGAATNNNNNNNNNNNNNAGCAGTTTGACCACTGAGAACAGGCATACATAGCCACTAAAAGTGAAATTAATAGTCTTGCAAAGGGTTTTNNNNGNNGTAATTAAAAGATGTTACATTTCTGATGCAGTAAATTATCAGGAAAATTATTTGTATTTGCAATATTGTGGGGGATGAAGGCTTTGGAGGGTGTTTGTTAGTGTCGTTTTAGCCATTGTGCTTCTAGGTTGGAATTGTTGTGTTGTGAGTG…
GmaAffx.90574.1.S1_s_at	CF806299	At3g20770	5e-42	Transcription	Transcription Factor	Unclassified	GCTTGCCATCATCAACCAAGAGGAAGCCTTGGCTAGAGAGCTTTACCCTGACTATTGCCCTCCATTTTCCTCTGCTGGAGGTAATGGATCCTTGGTGATCAATGATTGCAGCGAGCATGATGTTGATGGGGCCGAAGAAGAGCTGAACTTTGATGTGGAGGACCGGAAGCCTGACCATCTTCTTCCATCACACCTCGGGATGGAGAGAATGAGGGGAAGGATGCCAATTCAACAACCTTCTCATCCAATGAAGGGAGATGGTGTCACAAACCTAGATTTCATCCGGAAGAGGAAGATTTCTAGTGACTTCAACATGATGATGGATCAGAAAATATACACATGTGAGCATCCCCAATGCCCTTATAGCGAAGTTCGCCTTGGTTTCCATGATAGGTCTGC…
Gma.4836.1.S1_s_at	BI969339	At1g61700	3e-35	Transcription			TCGTTGTTTCACCTGCGGAAAGGTCATTGGAAACAAATGGGATACCTATTTGGACCTTCTGCAGTCAGATTACAGTGAAGGAGATGCACTGGATGCTTTGGGACTGGTTCGATATTGCTGTAGGCGCATGCTTATGACCCATGTCGATCTCATTGAGAAGTTACTGAATTACAACACTCTGGACAAGTCTGATCCCAGTTAAGAAGGCTTAAGGAGCAAAGAATGACCAAGATGTTTCAGTTGCATTCCATGCTATCTGGCCAATGAACAATCTTTTTTCCTTTTCTGAATTGTTTTGCTACAAGCTGGTCATGGTTGTGTGC
GmaAffx.1165.1.S1_at	BI425542	At5g49700	6e-10	Transcription	Transcription Factor	Unclassified	GCCGCCTTACTGATCGATCAATCACACGTCGAGTTTCTGTTTCTTTTTCTTCTGAGGTTAACTTTGTGGTTATTGTAATCAATTCTACTATATGTTGCTCTGTTTAATTTGATTTAGTTGGTGTAGTTGATATATCTGGTATTAGTTTAACTATTATTATTATTATTATAATTAGGTTAAGTTTATAAATGGAAACATTAGTATAGTATAGTTATTATGTAGCTAGGGTGGTTTATTTGCGGCGCTAACTGTATTATGTCGATGGCTCTCTACCT
Gma.9628.1.S1_at	CD414555	At3g24120	7e-28	Transcription	Transcription Factor	MYB	GAGGTACCTTGGTTGATCCTCTTGGTTTTTACTCCTTGCCATCCACTGAGGTAGCCGGAGTGAATGTCCCGGAAGAAGAAATACTGCCAAGTCTCCCACCCCAAAGGGCCGATTGTTCAACCGAAAGTTGTTTAACCTCGCATGAGAGCTCTGGAGGATTGGCTTTAGAAGGATCTCCAGGCGAGGGAAAAAGGAGGATGCTAGGCATGGACTCTATGGCAGCACCTTTGATCTGGAGTGAAGCTAAGATGAGAACTCAAGCCATCAATGTAGCTCAAGGTAATCATCCTCAAGGAATAACTAGGTATGGCATGTAGGGATGGAAGGTCTTCTTGATGGTTCATCCCCTCATAATATATAAACCTTTGAGCTTCATGCATTCCCTTTTTTTATGGGTAC…
Gma.4165.1.S1_at	BI969143	At4g13640	5e-13	Transcription	Transcription Factor	Unclassified	GAAGAAATACCGCTGAGTCTCCCACCCCAAAGGGCTGATTGTTCAACCGAAAGTTGTTTAACCTCACATGAGAGTTCTGGAGGATTGGCTTTAGAAGGATCTCCNGGCGAGGGAAAAAGGAGGATGCTTGGCATGGACTCGATGGCAGCACCTTTGATATGGAGTGAAGCTAAGATGAGAACTCAAGCCATCAATGTAGCCCAAGGTAATCTTCCTCAAGGAATAACTAGGTATGGCATGTAGGGATGGAAGGTCTACTTGATGGTTTATCCCGGCATGATATATAAACCTTTGGGCTTTCATTCATTCCTTTTTTTATAGGTACTTGAACTCTTCATGTCTTGTAAGTTAGTGAGACATAGGTGGAATCAATTTTACCCCTTTGTAAATTCAATCTAC…
Gma.4164.1.S1_at	BI968666	At5g67300	2e-15	Transcription	Transcription Factor	MYB	CTTTGCTCCCAATGATGACGGTGCCCTCGGTTTCTCCGACGGGGATGGCGCCGTTTAATTTTAGCGCAGAGTTTCTGGCGGTGATGCAGGAAATGATAAGGAAGGAGGTGAGGAGTTATATGGAGTTGCACAATCAGAAGAATGGGATGTGTTTTCAGGCTGCGGTGAATGATGGGTTTAGGAACGCTTCGGTGAAGCGTATTNGGAATTAGCAGGGTTGATTCGTAAATATTATCATCGAAGAATGGAACAACACAAGTAGAGATGAGGAAAAAAACTAAGAACCTGTTTTTTTNNCCTGTTTTTTTTTAATCAATGTTCTTAGGCAATAATTTTGGTTGATGTACAGCGAGACAGAACTCTCGATCCCTAAAGAGGCTGAATGGAAATTGGAACGAA…
GmaAffx.12236.1.S1_at	AW781232	At2g06390	0.003	Transcription			GTAGTACTTGGATGAGTGACCTCCTGGGAAGTCCTCGTGTTGCACCTCTTTTTACGTTTTTTTCCCTTAATCTGAGTATTTTTCTTTGAAGCGAAGTAAAAGGTCCGATAAGTTAACTAACGTTTGTGATTGATCGAGAGATAAATGTATCGTGGGCCCCATGGCTCGTTCGGTATAGAAAGTCGATCGTAAGTCGGTCCGTGAAA
GmaAffx.82034.1.S1_at	BM887093	At3g61890	1e-40	Transcription	Transcription Factor	Homeodomain	TGTGGACCCTAGTGGCATCTTGGACCAGTCATGTAGCAGTTCTCAATGGCTAGATTTCTGGACTTGAAAAAAACAAGCGAGCCACACTTTGTGCTGCATCTGCATGTGTGATGTTTTGTTTCCTCCGAGAGAAGGAACAAAAGATTGGTTGATTGGTTGGCTCTTGTGCTGCCAGCAGGTCCAAAACATTCCAGCCTAGCCAAGAAACTCGAAGGAAGTTTTGTAGGCTTGATTTGATAGGCGAGAGAATTAAGATAGCCTCACTCAATTCAATTGTGTAGAGATTTGGAAAAAAACAAATAATGTGCAATGTCTCTGTCTGTTCATGCTTGCATGCCTTTCCAACCCGTCTTTGCGTGTGTTCTTTCTTCTTCTTTTTTTTCTTTTCCCACTTCAAGG…
Gma.15127.1.A1_at	BI944140	At1g14920	8e-56	Transcription	Transcription Factor	GRAS	AAATATGCAACGTGGTGGCTAACGAGGGCGCGGACCGGGTAGAGCGTCACGAGACTTTGAGTCAGTGGAGGGGGAGATTGGACTCGGCCGGGTTCGACCCGGTTCATCTCGGGTCCAACGCGTTCAAGCAAGCGAGTATGCTACTTGCTCTATTCGCAGGCGGTGACGGCTATAGGGTTGAGGAGAATAACGGCTGCCTCATGCTTGGCTGGCACACTCGGCCACTCATCGCTACCTCCGCCTGGAAGCTTCCCTCCCCGAACGACTTGCACTGTAAACTGTAGATTAATTGGCTCCTGGATGGGTGGTAAATAATA
Gma.12508.1.S1_at	BU546358	At4g36920	2e-54	Transcription	Transcription Factor	AP2/EREBP	AAGATATGGTCCCTACAGGTCTCCGGGAGGAGAGTCTCAAATGCTTCAAAATTTTGCGCACATTCACCCACCAAATTTTCATTTTCCCAGAAGCAGCATNNGAGGCCGAATTGGGAGTGATCTTTCATTATCAGTGGCTGATCAACAACAGTGGCAAACCGGGCCTTCACGTTATTTAGCAACTGCTGCAGCATCATCAAGTTTCCAACAAGAGATAAGACCCTCTTCTCAAGGTTGGCTGCAGAAAAATGGGCTCCACAGTCTCATGAGACCCTCATGATCCCTATTATAAATAGAGAATTTTCTGCCTCGCCAAGTACTAGTTACATTCAAATAATCGTAATCTGCTCCCTAAGTAATATTATTATTGTTACCCTTCCAGGGTTTCACCCCCAAAAA…
Gma.15724.2.S1_at	AW350291	At3g44260	1e-106	Transcription	Transcription Factor	CCR4-Associated	CTACCGACGAGGTTGGAGGAATTCTTGAAAACCGTGAAGGTGTTCTTCGGAGATAACGTTTACGACGTGAAGCACATGATGAGGTTCTGTGACACGCTCTACGGCGGATTGGACCGCGTTGCACGGACGCTTAACGTGGACCGCGCCGTAGGGAAGTGCCACCAGGCCGGGTCAGACAGCTTGCTGACGTGGCACGCCTTCCAGAAGATTGTTGACATTTATTTTGTAAAGGAAGAGCACCGAAAACATGCCGGTGTATTGTTTGGACTATAGGCATTCTGTTAATTATAANAACNTAAAAATAATAAAAATTCAATTGATTGATTATTNAAAAAAAANANNATCTTATTTTTGTTTTATTTTATGTTGATGTGATTTCTCCTTTTGGTAGGAGATTGC…
Gma.12330.2.S1_s_at	BI972758	At3g16770	2e-26	Transcription	Transcription Factor	AP2/EREBP	TCATTCCACACCCAACTTACAAAAACCCATTCTTTTGCTCACTCATTTTCTTAACGTAGATTAATCATTATGTGTGGCGGTGCCATCATCGCTGACTTCATACCCCGCCGTGGAGGNCGCCGCCTCACGGCCTCCGAGCTCTGGCCAAACTCCTTCGCCAAAGACGATGACTTTGACTTGGATTACTCCCACATCGCTACCCAACAACCCTCCACTCTCAAAAGGTCCCAACCTCCCAAAGTTAGCGAGCAGGTTGAGAATAAGCCGGTGAAGAGGCAGAGGAAGAATCTCTACAGAGGGATTCGGCAGCGT
Gma.15605.1.S1_at	BM143798	At3g16770	6e-29	Transcription	Transcription Factor	AP2/EREBP	GAACAAAGCAGCAGCTCACAATCCACCACTGGATCCACCGGATCGCCGCCTTCCGCCGCCTTCCACGGCGGAGGAGATGAACTCGACCTGAAACAACTTGAACGGTTTCTAGGGTTGGACAACATGGGTGCTGAGTGGGACAACATGGATGACCTGTGGATGCTGGACGACGTCGTTGTGCCCAACCGTCACTTAATTTACTAGAAGGGAGATAATTAATTAATTAATAAATGGCGTTTTCTTAAGTTATAGTTTTATAAAACTATGTTGGTGTATGTGTTCTTAGTTTTCTGTTTTGTCTTGTCCTCTCGCTTTGGTAATTTCTGTTTTGTACGGTCGAATTATTTCAAAATTAGGTGCAACGTATCATGAGAGGGATGATTATATGTTATCATTATG…
Gma.4560.1.S1_at	CD393558	At1g01250	1e-38	Transcription	Transcription Factor	AP2/EREBP	ATGATGATGGTCCAGGCTGCCTCCGCCGACTCGCCGGAGAAAAGCAGCAGCATTACCTCCGACTGCGACGGCAGCGGTGGTGACGACTTCTGGGGCGAAATTGAGCTGCCAGAACTGCTCANCGNCAAGTGGTGGGCCTCCGACCGCCACGTAACGCCGTGGCCGGAGACTGAGCTTCCGCCCCAGCTGCCCTTCACCACGGCGTGCTTGTAGTAGTTTGTAATAATCAATAATGCTCTTCCCATGCTCTCATGACTTGGTTGGTATA
GmaAffx.7874.2.S1_s_at	AW152996	At5g51190	2e-24	Transcription	Transcription Factor	AP2/EREBP	CTATGAGAAAAGTGAGTTTAACAACAATAGTAATAGTAATAAGCATGTGAAGAAAGAAGAGTGCCCTTTGACTCCATCATGTTGGAAAGGCTTTTGGGACACTGATGTTATGGGAACAATCTTTAGTGTGCCTCCTTTGTCACCACTATCTCCACTAATGGTTGTTTGAGATTTTGTGGAACTTTTGCTCTTTCAATGATGTTTTGAGGTAACCAAACTAAGGGGAGAGAGAGAGATGATGCTGGTGATTGTCCTCTCTGATTTAGGTTGCTAATTTGCCTAAATCAAAATGGTAGTACTAATTAATCTACTA
GmaAffx.21313.1.S1_at	BE611932	At5g24800	2e-34	Transcription	Transcription Factor	Basic Leucine Zipper (bZIP)	TGTTTTCTAATTAGGGTCATGCCAATGCTTATGGAGCATTTGGCTGAC
Gma.4259.1.S1_at	CD412731	At3g04730	4e-62	Transcription	Transcription Factor	AUX/IAA	TTATTATGTGTCTCTGTAATTTTCTTATATGTGTATTATACGAATGAGAAAATAGTTGGAAATTCGTTAGGGACAAGAAATAATATAGAAGATGTTTATATGATCCCGTTTTTGTTTCCAGGTAAAAATATGTGACTTTGTCCATTCTATTGCCTGCTTAATNATAATGTCAATGTTTCCAGTTTATCTTAACAGGGTTTTG
Gma.3786.1.S1_at	BG363660	At2g24260	3e-43	Transcription	Transcription Factor	Basic Helix-Loop-Helix (bHLH)	ACTGCAATCTCCACTGCCACGTGTCNCACCAGGAACGTTAACGTTAACCCCTTGATCAANGCCGCCGCCGNNNCCNCCCANNTTCCGACNGCNGCCAACCCCGCNGGNGAAGGGCCGTCGTCTCCGAGCATGTCCGTNCTGACGGTGCAGTCCGCCNTCGCNGNCAACGACGGCNNNGCCNCCNNNNNNNNNNNNNNNTCCGTTTCGAAGCCGTGATGACGGTGTTTGAGTGACTTTATAGGAAAAAGAAGAAAAAAACAAAGTGAACAAAGGACAGAAAATGACGTGTGTTTTTTTTTNCTTAAAAAAAAAGGAGCCGTTAAAGTCTACGAAAATAANGCGTCAGGGATACGGAGGACTCGACGACGCCGTATNTACCTAGACTTTGTTTGGCTGATG…
Gma.3786.1.S1_x_at	BG363660	At2g24260	3e-43	Transcription	Transcription Factor	Basic Helix-Loop-Helix (bHLH)	ACTGCAATCTCCACTGCCACGTGTCNCACCAGGAACGTTAACGTTAACCCCTTGATCAANGCCGCCGCCGNNNCCNCCCANNTTCCGACNGCNGCCAACCCCGCNGGNGAAGGGCCGTCGTCTCCGAGCATGTCCGTNCTGACGGTGCAGTCCGCCNTCGCNGNCAACGACGGCNNNGCCNCCNNNNNNNNNNNNNNNTCCGTTTCGAAGCCGTGATGACGGTGTTTGAGTGACTTTATAGGAAAAAGAAGAAAAAAACAAAGTGAACAAAGGACAGAAAATGACGTGTGTTTTTTTTTNCTTAAAAAAAAAGGAGCCGTTAAAGTCTACGAAAATAANGCGTCAGGGATACGGAGGACTCGACGACGCCGTATNTACCTAGACTTTGTTTGGCTGATG…
Gma.13113.1.S1_at	CD391920	At2g42280	1e-46	Transcription	Transcription Factor	Basic Helix-Loop-Helix (bHLH)	TTCTTCTGCTTTGGCTCATCAATTGAGTTTGCCAAATACTTCTGCAGAAATGGCAGCCATTGAGAAGTTTCTGCAGCTCTCAGATTCTGTTCCTTGCAAAATTCGTGCCAAACGGGGCTGTGCCACTCACCCAAGAAGCATTGCAGAGAGGGTTAGAAGAACTAAAATTAGTGAGCGAATGAGGAAGCTACAAGATCTCGTTCCCAACATGGATAAGCAAACAAACACAGCTGACATGTTGGACTTGGCTGTTGAGTACATTAAAGACCTTCAAAACCAAGTTCAGACTCTTTCGGACAATCGGGCAAAGTGTACGTGTTCACACAAGAAGCAGCAATAACGCAAAAGGAGGAGGATACCCGCGTCATTACGTGTACAGCTTAGTAATAATTTGGTCTA…
Gma.6838.1.S1_at	AW349633	At5g45110	1e-174	Transcription	Transcription Factor	Unclassified	GAAACTTAAGGGAGGTTGATCTCAATGAGACTCCTATAGTGCAAAATAAAAGACTTCTTTCTAGAATGGAAGCCCTTACGAAAACAGTGGAGATGGGGCGGCGCTACTTCCCNCATTGCTCGGAAGTGNTGGANAAGTTCATGGAGGATGACNTGCCTGACTTGTTTTACCTTGAAAAGGGTACTNATGAAGAGCAGAGAATCAAAAGGACNCGTTTCATGGAGCTTAAAGATGACGTCCACAAGGCTTTCAACANGGACAAGGCCGAGTTTAGCCGCTCTGGGATTTCATCTTCATCATCCTCATCATCCCTCAGAGATTCTGTTGTACATTACAAGGCTAGGAAAGTGTAATAATAAAANCATACATAGCGTTTTTTATTTTGACATACATATTATA…
GmaAffx.34676.1.S1_at	AW395188	At2g38290	7e-13	Transporter	Inorganic Solute Cotransporters	Ammonium transporter	ATTGACTATTCTGGCGGCTATGTCATCCACCTTTCTTCTGGAATCGCTGGTTTAACTGCTGCTTACTGGGTACATAAATTTTACTCTTATCATATTTGCTTCAAATA
Gma.11837.1.S1_at	BQ296775	At5g60790	0	Transporter			GCAAAGCGCAGGTCATGCCTATGAAGAATTTATCCGATGGGCAGAGGAGCCGTGTGATATTCGCATGGTTAGCTTATAGACAGCCTCACCTGCTACTTTTGGATGAGCCAACGAACCATTTGGATATAGAAACAATTGACTCATTGGCTGAGGCATTGAATGAATGGGATGGTGGCATGGTGCTTGTTAGCCATGATTTTAGGCTCATAAATCAGGTTGCCCATGAGATATGGGTGTGTGCTGATCAAGCTGTGACCAGATGGGAAGGTGACATTATGGATTTCAAGGAGCACCTAAGGTCAAAGGCGGGTTTATCTGACTGAAGAAGATAGTGGGACTGGGACACTCCAGCATATCACCATCTAAGGACTACGTTACGTACTGCTGCTTGAGTTGGAT…
Gma.7643.2.S1_at	BG157292	At5g60790	0	Transporter			ACATACCAGTGGATGCTCTTTTCATTTTACACCTTATTTTCCTCCTAACTCTCCATCCTCTAAATTTTAAACATCCCTTCTATATTTCCTGTAATATCTCTTCTCAGTTTCTATACCACTTAGCAGGTTTTGTTTGGTTCCAAGGAGGGGGAAAGAAATTTAATGAGGGAAGGAGATAGATTTTAAATAAACATTCTGTTTGTTTGCTTGAGG
Gma.18030.1.S1_at	CD396158	At5g05200	1e-129	Transporter			AATGGGTGCTACAAACCAGGATGTTGATGCTAAGGCCTTTGCAAGAGATTTGGAAAAAGTATTCTCATCAATTAAGGAATTGGACACTGAAATAGTTGTAGCAACTACAACTGGAACAGCCACAAATGCAACTGCTGTTGCTGCTAATATAGTTGTTGATGAGAGGCAGATGAATGCACTCTTTCTTGATGTGGTTCGGGTTAGTGAATCATATGGATTGAAGTTTCCTAGAGAATTTGCTCTTCTCCTGAAACAGCTCTTGTACTTTGACCGGTACACACGGTTGCTGGCTCCCAACTTGAACATGCTTCAGGATCAGAGGATTTCCATTGCTTCCAATAGCAGAAGCAGGGTATAGAGNACAATTTTTAAGGAGTTGGTACACAAAATCTAGATGTA…
GmaAffx.47230.1.S1_at	CA820051	At2g38120	5e-72	Transporter			GAGGGTGGGCTAGCATGACAAACTTNNTCAAACAGGTTGACACATTTGGACTCTTTGCCAAGTGCTACCANTGCCCGCCAAAANTCCCNGCTTCCAACAACACAANGCTGCATCATTGAAAATTATATATNNGTTCTTNTGCNTNANACATATAGGGACACATCAGCATCTNCACCNTTGTGTATTTCCCCTATCTTTTNGTTTAATCTCNCTNNNTATAAATATTGTTNATGCTGATGTTCCCTTGTGTAGNAAGGCAACATTGTTATATTTCGCTTTCGAATCATNNTGGTTAATCATAANCATGCACTATAGTTATAGCATATGTAGGGANNGNTGATGTTTGGCAATTGGNATATAGCGACCTCAAGTATAGCCTGCATGTTTC
Gma.3737.1.A1_at	BI469846	At5g23630	1e-10	Transporter			AACACTGACGACGGGCATTGCAATGATGACTAGGTCAGAGACTGGACATGATGAATTTTGTTATAGGTTCTTTATTAATTGTCTTATTAGTTCTTTTCCCAGAGATGGATGGGGAATTTATACGANATCATTATTTTTGGGAGAANNGTATGAATTTTAGAACACGTGCCTTCCCAANTTATCTGANATGATTTTGTTAGCANCANGGAGTTTTTAATTATTTAAATGTTACGATTCATTATACTCAAAAA
Gma.12369.1.S1_at	CD408282	At2g46520	4e-75	Transporter			GAGCTAGCTAAAGGTACTTCTTGCATTGAAACAANGAGGTTTTAGNNGCTATTATCATNNNNNNNTTTTGTCAGNGCCATGAATGCTGAACTGAATTTCCTATCGGTCCCATTTTGAACACTGTAAGCATGTGTCTTGAAATGCGATTNGGTCTGTTGGGATCTTAATGTAAATTNTNTCATGCTTCTTCCCATTCCCATTTTCCTATTNTCCTGCTGTTTCAGCATGCATGCCTGTGAGCAAATTGTAATCCATATCTTCGGTGCAGTCATTTGTGTAAACTTGCATT
Gma.10964.1.S1_at	AW277625	At1g07810	1e-125	Transporter			GTTTTGGTTGTTGCACTTCCGGTCATTCTAATTGACGAGATTCTGAAATTTGTGGGGAGGTGTACAAGTTCTCGAGCATCAAGTGCAAGAAAATCAAAGCAAAAATCAGAGTAGACGNTTTACTGTAGTNATTAGNAAAGTTGCTCAATCCTTCAGCGACATGNACGATATNATATTAGAGACTGAAGAGGTGGCNTCAACGNCAATTAATCTTAAGTTAGTGCTATTTTAGGCCTTTCTGTAGTCTTCCATCCCATTTTATAATNNGGGATGGCCGGGCTTGCATTGGGTGCACTATATGTTGNTTTTTTTTTAAATCTNTTATTATCCTTTTGCCCCTTTTCTTTGAACATTTTAAAGATATTCACNAAANNAAGGGAAAAACCTTNNANNNNNNNA…
Gma.1802.1.S1_at	CA935681	At1g67300	8e-79	Transporter			GAAGCTCAACGCAGGAACTATGCATTGTTTTGCTGCAATATTTGTACGAAAGAGGTTTAGGTATTATGGCTAGCTGTGATGTAGTAGGTGGTACTATTAGCGGCTTACTTACGACACGACACCCTTCTGTTGTTACTCGAGCCTTGTGATTCTCTGATTTGGCATCCACTTAAAGGGAGACATAATTCATCAAGGGGGATCTATGCATCCCATAATATTTCCTTAAATGTACTACTTTANGTAATATTATATACGNTNCTGTACGTGACATTATTTTTAATCGCTTGAATTTTGTCCCATTTTGGATACGAAGTAGTCTAGCGTGTAAATTCTGTCTGCAGAGTTTATCGATGGGCGNAAGCTTCGTGAGCTTAAGAAATAGCTATGATCCGTAATTCA…
Gma.10954.1.S1_s_at	BU551388	At5g26340	1e-114	Transporter			GTGAGACTTTCCCATTGGAGACTCGNTCCGCTGGTCAGAGTGTCACCGTTTGTGTNAACNTGCTCTTCACCTTCGTCATTGCACANGCNTTCCTNTCTATGCTCTGCCACTTCAAGTTTGGNATCTTCTTGTTCTTCTCTGGCTGGGTCCTCGTCATGTCTGTCTTCGTGCTTTTCCTGTTGCCNGANACNAAGAATGTCCCCATNGAAGAGATGACCGAGAGAGTGTGGAAGCAGCATTGGTTCTGGAAGAGGTTTATCGATGATGCCGCNGATGAGAAAGTAGCCNATGTCTCTAATGGTAATGGATTTGATCCAACCTCCAGGTTGTAAATCNATTTGCATTGAGTATTTTAGACTCTAG
Gma.3580.1.S1_at	BQ742749	At3g18830	0	Transporter			GTTCTCCATCGGTGCGGGTCCCATCACGTGGGTCTATAGTTCTGAGATCTTCCCGTTGAGGCTGCGGGCGCAGGGTGCGGCCGCGGGAGTTGCGGTGAATAGGACCACTAGCGCGGTTGTCTCAATGACTTTTCTGTCCCTCACTAGAGCCATCACTATTGGTGGAGCTTTCTTCCTTTATTGTGGCATTGCTACTGTTGGGTGGATATTCTTTTACACCGTCTTGCCTGAGACCCGGGGAAAAACGCTCGAAGACATGGAAGGGTCTTTTGGTACTTTTAGGTCCAAATCCAACGCCAGCAAGGCTGTAGAAAATGAGAATGGGCAAGTAGCACAAGTCCAGCTAGGAACCAATGTCCAAACTTGA
Gma.7365.1.S1_at	CD412721	At4g30360	1e-156	Transporter	Ion Channel Families	Cyclic nucleotide gated channel family	GATTAGTTACACTTATTCAGTGGCATTTGGTTTTCAAATTCGGTTGGGTCCTGCATTCTATTTCAGTATGGATAATGATTCTGCAGGTCACNAAAATCCTGCGTAACCCTCTGCCTGCCGTATGACCCTTGCTGGTAGGGTTGTCGATGTATTTTAATTAGTAAGATACAAAGGGGGAAATATAAGGTTATGCCAGGGAATGGTGATGGTGGGTTTTTTATTGCTCAGTTGTGTATACTCATATTTATTGCAATTTTCATCAGAGTAAGTTGATTACTATTCTACAAAGTATGCATCAGACCCTATTAGATGGCCCCAATCTTATAAAAGGGTGGAAAATGGGGGCAATGTGAGAATCGTTGTTTTTGTTGCATTATTAATGCTACTCAGTCCTTAAAT…
Gma.9831.1.S1_at	CA934968	At2g34190	1e-25	Transporter			ATGGAGATAGCCGTAATGAAGAGTTCTATACACTTCCTTTCAACCTCAACCGGTTTTTCCCTCCACGGTAGGAAAGTTAGTTATACCATCAAGAAAAGATGTTATNAGGAAAAGCATCATTTTCCTGAGAAGGGTTATATATTTAGTTGGTGTGAGAGTGAAGCCTGAGTGATAACTGTGTAAGTGTGTATCATATGG
Gma.12504.1.S1_at	CD393758	At4g38920	2e-58	Transporter			ATCTACGGTTTGATCATTGCGGTTATCATAAGTACGGGCATTAACCCTAAGGCCAAATCGTACTATCTTTTTGACGGCTACGCCCACCTCTCTTCAGGTCTCGCTTGTGGCCTCGCTGGCCTCTCCGCTGGCATGGCCATCGGCATCGTTGGCGATGCCGGTGTTAGAGCAAATGCTCAGCAGCCAAAGCTTTTTGTTGGAATGATACTCATCCTCATTTTTGCTGAGGCGTTGGCATTATACGGTCTCATTGTTGGCATCATCCTCTCTTCTCGTGCTGGCCAATCCAGGGCTGACTAATAAATTTTCCTGTTGGATGCCACAGATTGTGAATGTTACTGTGAAGTCCGGGTGGGTAATGTTAGTACACAGCTGCCGCTTTGGCTTGCTCAAGTGATT…
Gma.11321.2.S1_at	BE807077	At4g38510	0	Transporter			TGAGGGAATGACACGAAAGGATCATTCNGATGTGTCCAACCAGCTCTATGCAAATTATGCCATTGGAAAGGATGTCCAGGCAATGAAAGCNGTGGTCGGAGAAGAAGCACTTTCATCTGAGGACCTGCTGTATTTGGAATTTTTGGAGAAGTTTGAGAGGAAGTTTGTTGCCCAAGGAGCNTACGATACACGCAATATCTTCCAGTCACTAGATCTTGCATGGACTTTGCTTCGGATTTTCCCTCGCGAGCTTCTNCANCGTATTCCTGCAAAGACTCTTGATCAGTTCTACAGCCGAGATGCCNGNAACTGANGATATAATANNNGCAAGGTCTTATANNNNNNNCCTTAGTCACATGCTCAATCATCTTGTAATGACCNTGACNATTGTTTTATTTC…
Gma.4379.3.A1_x_at	CD392760	At4g11150	1e-22	Transporter			ACTTGATGCACGTCTTGATGTAGTTTTCCGTAAAAAGCTTCCAGAGATCCGAAAGCAGCTCTTTGGACAAATTGTTGCTTGAAGATTTTGATTGTATTGTTTGGTTACCGCTGGAATGTTAATATCCCAAAGCAAAAGCTTTGTCTTCATGTCCTTGACCTGAATAGCTATCAAGCCATTG
Gma.3672.2.S1_at	CD407926	At1g34130	1e-148	Transporter			GTTACAGGTTTATGACTTTTTGTCAACTTCCCAACTTAACCTATTGGCTTGGTACCACTTGTTTGACACAAATTATACAAGGTGGCCGGAATAGAACTGTGTAGAAACTAACTGAATCGTACAGGAGTGGCCAATAGC
GmaAffx.85761.1.S1_at	BE658257	At5g05820	1e-141	Transporter			TCACTCACAGTCCTCGGAGTTGTACTTTATAGTNAAGCCAAAAAGCGAAGCAAGTGATACTGATGNTGTNNGTCATTCATGATTCTGTGGAAATCAGCAGTGAANTCCCTATATTTGTTTTCATNNCTGTGCGGACAACCTCCAGATACCATGAGGNCAAATTTGNTATCATGATTATGACCAGAATGTTTCAGACTCTATATAAATTTTTGGCCCTACATGGAAAAACGGGTTCCCCATTGTATTAGTACCTGTGCAGAAATAGCCCACAGTACAAAGTTTCAATAAGTGACTGATCTCTCTAATATATACCCATGTTGGC
GmaAffx.85761.1.S1_s_at	BE658257	At5g05820	1e-141	Transporter			AAAAGCGAAGCAAGTGATACTGATGNTGTNNGTCATTCATGATTCTGTGGAAATCAGCAGTGAANTCCCTATATTTGTTTTCATNNCTGTGCGGACAACCTCCAGATACCATGAGGNCAAATTTGNTATCATGATTATGACCAGAATGTTTCAGACTCTATATAAATTTTTGGCCCTACATGGAAAAACGGGTTCCCCATTGTATTAGTACCTGTGCAGAAATAGCCCACAGTACAAAGTTTCAATAAGTGACTGATCTCTCTAATATATACCCATGTTGGCATATAATCGAGGAATGTCTTTTTGTCATTTATTCTTTGAAGAAAGAGTTGTAGAAGGATCTCTACTCATTTGTTGTTTACATTGCTTACATTTATTTATTGATGATAAAATTTGTAT…
Gma.2372.1.S1_at	BM143592	At2g38940	9e-27	Transporter	Inorganic Solute Cotransporters	Inorganic phosphate transporter family	AGCAAAGCAGATGCAGGGTACCCTGCAGGTATTGGTGTGAAGAATGCACTTATTGTCTTGGGTGTGGTTAACATTTTAGGCTTCTTCTTTACATTCTTGGTGCCTGAGGCAAACGGNAAATCATTGGAGGAGATGTCAGGTGAGAATGATGAGGATGTTGGAACCCAGGAAGAGTCAGAGCAATCACATTCTCANAACAACAATAGAACNGTTCCATATGTTTAGGATATGTTTATCTGTAATNTTGTTATANNNNTAAAGTAGTNGCTTCAANNNTTAGGCTTGGAAAGCACAAAAGCTTTCCNTGCNCCNCTNCAATATTTCTGTTAAATTTTGCCNGAACAACATNTANCAGGAANNANNAGATATTTGTTCTACGAATATTGGCAAATTTGAGTT…
Gma.16142.1.S1_at	AI856140	At5g50460	3e-22	Transporter			CTCAAATCCAAGCTCGGGAACAGAGAAGGAGAAAGAGAATGGACGCCATTGATTCTGTGTTCGATCCGTTGAGAGAATTCGCAAAGGACAGCGTGAGGCTCGTGAAGCGCTGCCACAAACCCGATCGCAAAGAATTCTCCAAGGTTGCCGTGCGTACCGCAATTGGTTTCGTTGTGATGGGATTCGTGGGTTTCTTCGTGAAGCTTATTTTCATTCCAATTAACAACATCATCGTCGGATCTGGTTAGGATGAAGGGTACTACAATCGCCTCAGGAATTCAGGTTGTCAAGCAAAAGTAGGCAGAAAGAGTTCCCACATCAATAGATCATTCTATGCCCTCAATCTTAGTTCTGTTTTCATTTTTGTTTTTTTTTCTCATCTCAGGAAGTGTTACTTAC…
Gma.6525.1.S1_at	CD413671	At5g50460	2e-18	Transporter			AGATCCAAGCTTGGGAGACAGAGAAAGAGAAAGAGAATGGACGCCATTGATTCTGTGTTCGATCCGCTGAGAGAATTCGCAAAGGACAGCGTGAGGCTCGTGAAGCGCTGCCACAAACCCGATCGCAAAGAATTCTCCAAGGTTGCCGTCCGTACTGCAATTGGTTTCGTCGTGATGGGATTCGTCGGTTTCTTCGTGAAGNTCATTTTCATTCCAATTAACAACATCATCGTCGGATCTGGTTAGGATGAAGGGAACTACAATTGCCTCAGAATTCAGGTTGTCAAGCAAAAGGAGGTAGACAGAGTTCCCACATCAATAGATCATTTTATGCCCCCAATCTTAGTTCTGTTTTCATTTTTGTTTTTTCTTATATCTGGAAGCGTTACTTTAGATGTA…
Gma.11339.1.S1_at	AW311583	At3g18280	1e-21	Transporter			CTTGTTAAGCACCTCTTATATATATATATAAAATGTGTGAACAATATATATATATTGATTAAAAAATATAGTTTAATTTATATACACACTTTGATCCTATAAAAACATCTTGACACAAGCATTCAATAGAATTTCACCACTTTATCATGACATTTTACTATAATGATGTGGTAATAAAGTAAATTCTTGTTGAATATTTTGTATAAAGATGCTTTATACTCATGGTTTCTGTGTATAAATTAAGCTTATATATATTTACACTATATATTGCCACTTTACGTTTGTGTGATATTAATTATACAGTCAAGTATTTATTAGCTATCTTTGAATATGGTGTATACACTAGTATACATGTTGTATCCAGGGAATTATGGTTAAAGAGCTAT
Gma.16024.1.S1_s_at	CD415233	At2g43330	3e-87	Transporter			ATTTACCTTATCGACCATGCTGGACGAAAAAAATTAGCTCTTTCTAGTCTGGGAGGAGTAATTGTATCTTTGGTCATCTTGGCCTTTGCATTTTATAAGCAATCATCCACGTCAAATGAGTTGTATGGATGGCTTGCAGTTGTAGGCTTAGCCTTGTATATTGGTTTTTTCTCGCCAGGAATGGGGCCTGTGCCATGGACTCTGAGTTCAGAGATATATCCGGAAGAATATCGAGGTATCTGTGGGGGCATGTCAGCTACTGTGTGTTGGGTCTCAAATTTGATTGTCTCAGAGACCTTTCTTTCAATTGCGGAGGGTATAGGGATTGGTTCAACTTTTCTGATTATTGGTGTCATAGCTGTGGTTGCATTTGTATTTGTGCTTGTTTATGTTCCAG
Gma.13167.1.S1_at	AJ563366.1	At1g77210	0	Transporter			AGGTGCAGTCTTGGCTGTGAACTTTGGGCACGGCAAAGAAATTGGGAAAGGAGTGAGTGCCTTTCTGGTTGTTGTGATCTTCTTGTTCGTTTTGGCATATGGGAGATCTTGGGGTCCCCTTGGGTGGTTGGTTCCCAGTGAGCTCTTCCCATTAGAGATAAGATCATCTGCACAGAGTATTGTGGTCTGTGTCAACATGATCTTCACTGCACTTGTTGCTCAATTGTTCCTCATGTCACTTTGCCACCTCAAATTTGGGATCTTCTTGCTCTTTGCTTCCTTAATTATCTTCATGAGCTTCTTTGTCTTCTTCCTTTTGCCCGAAACCAAGAAAGTTCCAATTGAGGAGATTTATCTTCTTTTTGAGAATCATTGGTTCTGGAGGAGATTTGTAACTGA…
Gma.7112.1.S1_a_at	BG363393	At2g34750	1e-96	Unclassified - Hypothetical Protein NOT Supported by cDNA			TTTTAACCCTGACTTGAACAAAATGTCTATTACTCCCAGAAAATCTTTTAAACATGGGTTTGAGACACCGTTGAATCAATGTACGCGAATGCCAGCAAGAATCAGACCGTCCACTAGTCCGGAGTCTCTGTGATACCTATCTGCTTGTGATGATCTCTNTACATAAAATAGGAAATCTGTCGATCTTNCAGTGTTCATGCCAGGAACTAATCAGCATAGTGGTGTCCTATAAAATAGGGCATTGATATTTTTGGGATTTGAGTCCTATACAACGAGGGGAGTTACTTAAAAGGAAAGTGTGGAATTATAGCCGTTAATTTAAGTNGTTCTGCACATTNGAGGAGCAGAGTCAAATTCGTAATGTTCATATAGTNTNANTTTTTTNTTCACANCTTGTAC…
GmaAffx.74126.1.S1_at	BQ453414	At5g36670	7e-21	Unclassified - Hypothetical Protein NOT Supported by cDNA			GAACCAGGTGATCAGTTGCCACGTAAGCGTGGAAGACCCCCCCTGGCTGGCCGACAAAACCATCTCGTGACTGTGGTGACACATAATAGAAAAGGAAAGGCGACCCTTCGAAAAGGTAAAAAAGGTTTAACTAAGAGCGATGGTGCTAAGGTGAATGCAATTGGCGATACAAATTCAAGGAATTCTACTGGGGGTGAGTTAGAAAAGAAGGAGGATTCTCTTGTCAAGAGGAATGCAGTAAAGCAATTAGTGAGGGATCAAATAAAGGAACAGCTCTCAGCTGCAGGGTGGACAGTTGACTTTAGGCCCAGGAATGGCAGAGAGTACCATGATGCAGTGTATGTTAGTCTGGACGGACATACACACTGGTCAATCACCTTGGCCTACAAAAGGCTAAAA…
GmaAffx.71068.2.S1_at	CD402954	At1g63850	0.001	Unclassified - Hypothetical Protein NOT Supported by cDNA			GCAGCAAATTACTGGTTTCATTGACGAAATATAAAAGTTTCTGACCGTTCAATGCAAACTCCTGGGCNAGANTNNAANGTAGTTNGAATGCTGTGAAAGTATGGTTGGCCTTCAATTTTCCNAGTTCCTAAGANGAGCCNAAATTTTCAAGTTCAGCNACTCGTGGNAGGTTAAGTTCTTCCATTGAGTTCATGGAAGGTTCAACATAAGGCTAATT
GmaAffx.3108.2.S1_s_at	BI967604	At2g38360	1e-63	Unclassified - Hypothetical Protein NOT Supported by cDNA			GTCCGTCAGATCAACCACTCGTTATTCTTGGCAGAACTTTTTCAGATTTCGAAACCCTAGCGCTCCTCTCCGCCTTCACCGTCTTCGTCGTCTTCCTCACCAGCGTTGGATCTGTTCTCGTCTCCGCTCTCATGCTTGGCGTCGCCGTCGTCTGCCTCCACGGCNNGNNNNCNNCGNNGCCGGAGGATCTGTTTCTTGACGACCAGGACAACTCTCAGGC
GmaAffx.79307.1.S1_at	CA820571	At1g55890	9e-31	Unclassified - Hypothetical Protein NOT Supported by cDNA			GCGAGGGCATGATTACAGAGGCTAAGGAGATTGTGGAGATAGGGAAAACCAATAGGTACTGTCGCTATAGGTTAGATTTGCCAGCAAAAGAGTAGAGTTATTTAGTCGCACTTTCTTATTGTTCTTGCGGTTTAAATGGTTTTCATAATGGTGATTGGGAAATTGTCAAGAATGGATTTTGTTTGGCATTGTGAGCTTAGTAAAACTGGTTGCTTCATAATGGCTTATGCAGTCTGNTTGNACTAGCTCTTTTTGCTGGTTAGATATTAGCCCTTAAACTTTACCCCTGCATCAAATTTCTTGTTATGTGAATTTGCATTTAGCAGTTTTAATATGGAATGCATACCTGCATGCACATATGAACTTATATGTGGATGTTTTGGAGTTTGGTCTCCCTAC…
Gma.1626.1.S1_at	BU543989	At4g01400	1e-113	Unclassified - Hypothetical Protein NOT Supported by cDNA			GACACGTTTGTTCATTTGATTATTGACTTCATTGTGAAAAGGCTAGAAGTCATTATGATGCAGAAAAGATTTAGTCAGCTAGGTGGTCTTCAGCTTGACCGAGATGCTAGAGCTTTGGTAAGCCATTTCAGTGCCATGACACAGAGAACTGTTAGAGACAAGTTTGCACGTCTTACTCAAATGGCAACAATTCTAAATTTAGAAAAGGTTTCTGAGATTCTAGATTTCTGGGGTGAAAACTCTGGACCTATGACCTGGAGATTAACTCCAGCAGAGGTTAGGCGTGTATTGGGTCTGCGAGTTGATTTTAAATCAGAAGCNATAGCTGCTCTGAAGTTGTAATATCCGTTTATATGGTCTCTTCACATTCTTCTTTTTATTGGGTTATTACATCTTCAT…
GmaAffx.90087.1.S1_at	CF805812	At1g01170	2e-11	Unclassified - Hypothetical Protein NOT Supported by cDNA			ATTGTGAGTTAATTGATGCACCTTGTTCATGGGATATGTTTCCATAAATGATGATAATGTTTGAGGTAAAAGTCTTGCAGTTCAATTAGTGTTTTGATTTTTAATCATGTGAATGCTTACTTGCTAA
Gma.10639.1.S1_s_at	BI470008	At2g41010	3e-27	Unclassified - Hypothetical Protein NOT Supported by cDNA			ACGCTCGACACGTCGGCCTTCCTGCTGGACCATCACCAGCAGGTGGTGGGGCCCTCCTCTGTTAACTCTGGGCCTGCCACCGGGCTTTCTGGGCCCGGCCCGCTCCCCTTCGCCCAACCCCTCCTTGACGCTTCCTTCGCCTCCGCAGGGTTAGATTTTGACACCTTCTCCAGCTTCCCCACTCTCGAGTCGTGGAAAGTCATGTGATAAAGAAAGAAGAGAAAAAAAAAANTTGAGAATATGAGATGAGATAGATTCTCTGAAAATTTTCTTTTTNCTTTTTCCCTTTTTGCCCCTCTCGTGGGTTAATGAATCT
Gma.1694.1.S1_at	BE609625	At4g32270	1e-28	Unclassified - Hypothetical Protein NOT Supported by cDNA			GAATTACTGTATTTTTCTGAACACAACACTAAATTCAGCTGTGACACAGACAATTTGTGGTAATCTGAAGGATCTCTTTACTATTGGCCTTGGCTGGATAATTTTTGGTGGGCTACCATTTGATTTTTGGAATATAATTGGGCAATTTCTCGGTTTTGCCGGATCTGGCTTATACGCCTACTACAAGCTCATTGGCAAGTAACTTATTCAAGTCCTCTAGATGATGTCTTTTTTTCAATTTGGGAGTGCCATGTGCTTCAGTCTTCTGCCCATCTCTGCATCCCTTGAGAAGGGAGAAGAATCTGAATCAAACTCAGGTTTGGGAACTTGTGATCGACTAATCTTATACTATGGGGAAGTTTTGCTAATACAAGTTGACATACAAACAGTTTCTGGGGA…
GmaAffx.40242.1.A1_s_at	BE820856	At3g51120	2e-14	Unclassified - Hypothetical Protein NOT Supported by cDNA			GCAGTGATCGATTTTCTGTGTCCAGAGATCGGGGTTTTCAAGGTCATGGTAGGGAATCAGGTTTTAGTAGAAGCAGAATTCCATATAACAGGCAACCGTCATATGGTGTTGGAAATGGAGGATCATATAGGCCTCTGCCCAAAGGGCAGCGAGTTTGTAAATTTTATGAAAGTGGGTACTGTAAGAAGGGAGCATCCTGTGATTACTGGCACCCATGATTTTAGATTCCATTAGCACTGGTCACACTTGTTTTTTTTGTAATCCTTAACATATCTGAAGTTGGCTCTT
Gma.17986.1.S1_at	BM954903	At5g54470	3e-14	Unclassified - Hypothetical Protein NOT Supported by cDNA			GCAATTCACATCTCCGGTGCTATATCCCGCCACCTCTCCTCCACCTGCACCTCTTGCTCCCTGGAGATTCCTTCCGCCGACTCCGATTCTCTCCCTTCCTCTTCTACCTGCGTCTCCAGTTCCGAGTCTTGCTCTACGAATCAGATTAAGGCGGAGAAGAAGAGGAGGAGGAGGAGGAGGAGTTTCTCGAGTTCCTCCGTGACCGACGACGCATCTCCGGCGGCGAAGAAGCGGCGGAGAAATGGCGGATCGGTGGCGGAGGTGTTTGAGAAATGGAGCAGAGAGATAGGGTTAGGGTTANGGGTGAACGGAAATCGCGTGGCGTCGAACGCTCTGAGTGTGTGCCTCGGAAAGTGGAGGTCGCTTCCGTTCA
GmaAffx.38342.1.S1_s_at	BE820726	At5g25560	3e-26	Unclassified - Hypothetical Protein NOT Supported by cDNA			GACCACTTTTGCTCTCACTTCATTGCTGTGTAGGTGTAGTGGCAATCCAAGTGCATCCTTTATTGAGGAAAATGCATGTGGGAATTGTCATTTAATTGCAGGCAGGCCGAACCACATCCAAGAGAAAAACGGTTTATCACGTTGATGTGGTGTCGAGGGTAGTGTAGAGTCAGCAATTGTCGTGTTGGTTATTTCGTGT
Gma.4917.1.S1_at	BI969807	At1g04940	2e-75	Unclassified - Hypothetical Protein NOT Supported by cDNA			AAAAGAGTGGCCTCATTTCTTCAGATTTCATGTTGTGATGGGAATGTTATTGGAGATTGCCCTGCAGGTTATAGGGACTGTGAGCCGNTGGATGCCNCTATCACTCTACTGGGGTAAACTGGGAATGCATTTNTGGACTGCCGTATCATTTGGTTATCTNTTTACNGTCTTGGAGNNCATAAGGTGNGCTCTTGNNGGTATGTATGCTGACATTCCTTTCATCTGTGANNGCAGCATATATCCANATNCCATATGATTAACANGGNAGANGTAAGGAAGTTTANNNTTACATTATGTATCACTTTTCGTTGTATNAGANTTTTTCTTGAGCAGNATTGAAGAANNANTAGTCTGTTAGTGATTGTTTATGTGAAAAAAATATGTATTTGAGATTTCCCT…
Gma.11249.2.S1_at	BE611552	At3g50590	2e-76	Unclassified - Hypothetical Protein NOT Supported by cDNA			GTCAACCATTGGATACGATGTCTGTGATCTCTGCGGAGCCAAATTTTCAGCTGTGACTGTGCCTGGATGCATCGTCTGCGGAATGGGAAGCATCAAGAGATCAGATGCTCTTGCAGGAGCAGGACCAGTTCCTTCTCCGTTCGGTTGAGTCTCAAAGATGGGTCTTAATCCTTGCGCTCTATATAACCTTTGCTACTCTAATGTTGTAAAGGGAGACAACTTTGTAGAGAAAGTATACAAGAGAATGAAGGGATTATAGGGTAACAAATATTGCACCACTTCTAGAGAGATTATAGGGTTTATCACATACTGCTTGAGTTTTGATTGCGATTGTGATGGTTGTCTGTGATTACAGAATATGTNNCTCTCCNNTATGTTTGTAATTTTGTAATTATATTC…
Gma.6865.1.S1_at	BI971010	At1g27910	8e-21	Unclassified - Hypothetical Protein NOT Supported by cDNA			AGACCCTTCACCAGTTAAGACACATCAGTGCTCACCTGAAGCTAGTGATTTGTCTATGCCGCCTGCTGAAATGAAACCGCTATGCAAGTCCATTTCAAGAAGAAAGTCTGGGAGAGCTTTTAGCTTTTTCTGGAAAAACAAGAGCTATTCTGTATACCAGTGTTAAGTTCCACTGGTTGTTGTAAATCTGTGTTAGCATGTTTACTTTTGTGGCCCTGTTTTTATCCTCCTATCCTTCCTCTTCCCGTGGGGTGCTGCTTATTTTTGGTTCAAAGCGAAGAAGAGATGTACAGGCCTTTGTAATTTATGGATTTTGTTTTCTTCTTTCGCTTTCCTCTTTGTAATGTCAATTTTCCATGTGGTGTTGNTTTTTTTTTTTTTTTTTTCCGGTTCATGTTC…
Gma.1337.1.S1_s_at	CA802041	At4g24690	4e-17	Unclassified - Hypothetical Protein NOT Supported by cDNA			GGTGTTTCTGAGTGGGACCATATGCTTGAAGAGTTACAGGAGATGGGTTTTCGTGACAAAGAGATGAATAAGAGACTGCTTGAGAAAAACAATGGAAGCCTCAAACGTGTTGTTATGGATTTAATAAACGGCGAGTAGTTTTAGTTGAAATGTTAGTTAATAGTTTATGTAAAGGTGACGACTTGTGCTCCTAGGGTGCCTGATACTTGCCTGGCAGTCATAATTATCTTATTTCCTATCTCG
Gma.8864.1.S1_at	AW350534	At5g42220	4e-53	Unclassified - Hypothetical Protein NOT Supported by cDNA			TAAGCTGCTCGAGGGACATTCTGAAACGGACAATGTCTAATTTTAGCTTGTATGAATACATATGCTTCATTGCTTCTATTGTGTTGCAAATCTCAACCTTCCTGAAAGTCCTTCTATTGTGTCCCAAATCTTAACCTTCCCGAAAGTCCTTCTAGAGAACGAGTTTTGCGTGTCGTGCCCTGAATAATTAATCATTTTGACGGACTTCCAGATCATGTGAGAAAATTAGCATACACCACATGCCAGACGGTTGTTTCAAATGTAGCATTGAGGCGTTTAATGGCCTTCCATTGTTATATTTTTTATGCCCCCTTTCTGATTATACCCTCGTTTGGGCTTATTTCGGACAGTGTGGAGGCTTCTATCAAATAGTCTTGTACATCTAGCGCTTCCATTATT…
Gma.11974.1.S1_s_at	BG650762	At5g56340	0.003	Unclassified - Hypothetical Protein NOT Supported by cDNA			AAACTGAGTATTTTTGCATATCTGTTGTGCTATTCATGTGCTGCCTTGCTTATGTACAGTTTTCG
GmaAffx.92111.1.S1_s_at	CF807836	At2g27490	7e-06	Unclassified - Hypothetical Protein NOT Supported by cDNA			GACATGGACTGAGTTTTTGCGCTCCAGGCAGGGAGTCTTCGCCATTCTTGCTTCCTTCACCTCAGGTGTTGTTCTGTTTATGAAGACATTCAACAATCATACCCACATTTCATAGCCACCTGTGTTCTACACATTTGTTAATGTATTATTTACATTCCCTCTAAAGCCCTAAACCCATGAGTTCTTTTGTGTATCTCTTTTCAA
Gma.6370.2.S1_a_at	BE346886	At2g23970	5e-59	Unclassified - Hypothetical Protein NOT Supported by cDNA			TAAACGTGTCATCATCTTTACCCTTGGCTTTCTCATNCTCTTAAGNNCTCCCATCAAAGCTTTCCATTTACAAATGTCACCGGGATGNGATCCTAGAGCTCCCTCCAAAAGCAGAGGTGATTGCTTGGTCAGAAATGACTGGAGTTGAGATGTTTAGCTATGGAGACCACATGTTTGGCATCCAAGGCCACCCGGAATTCACCTATGACCTTCTCTTGTTCTTTATTGACCGTATTATTCAGCGAAATTTGGTCCAGGA
Gma.8049.1.S1_at	CD397366	At5g63970	8e-83	Unclassified - Hypothetical Protein NOT Supported by cDNA			TTGATAACTTTCAGTTCGGCACGAGCACAAAGATTACGTCTGAGAACAAAGATGCATCAAAGAAGGAAGCAGCATTTGCACTTGCTGCCCTTATGGAAATTCCAATTCAGTACCGGATAACCCAAAATCTACAAATCGCCAATGAAAATCCAACAAGTCATCAACGTAAAAGGCCTCTTCCTCCGCCTAAGGAAGTAATAGATCGTGACAATGCAGTCCTAGCTGTTCCACACGTGCCAAATTTTGAATCAGTTGAGCCATCAGCTCCAGCTGCAGTANAATCAGTATGCCCTATTTGCTTAACAAATCCGAAGGACATGGCTTTTGGATGTGGTCATACAACTTGCAAGGAGTGTGGTGTGACATTATCTTCATGCCCTATGTGCCGGCAGGGAAATT…
Gma.15708.1.S1_at	BG653340	At1g12650	3e-59	Unclassified - Hypothetical Protein NOT Supported by cDNA			GTCTGATTCAGCGAAGCATATTGATGCAGAAATATTGGCCAAGCACAAAAAGAAAGAGAGAGAAGCAACAANNCAGGGAAAACGTCCCTTTTATCTCAAGAAATCTGAAATACGGAAGCNAAGGCTTATTGNAAAATATAACCATCTAAAGTCATCTGGCAAACTTGAAGCATTTGTTGAGAAAAGGAGGAGGAGGAATGCTGCAAAGGACCATAGATACATGCCATATCGTAGATCTGGTGATGTGGAATAGGTTTTGTAGCTTTAAGATTCTTTCGTAGGCTACAATTATACTGGAACATAACACCAAAAAGAAAAATAGTTTATGCATTTGGTCTGCCATCTTTNNGGATTAAATGTTGAACCCTTTTTGATGACTATCATGGTATTTGTTCTGTG…
GmaAffx.5770.1.S1_at	AW396331	At5g67240	2e-23	Unclassified - Hypothetical Protein NOT Supported by cDNA			GAAACAAACAGTGTAGCCGTGGCATGGAATGGTGGATGGTCAAATGAATTCGAAGGCAANNATNNNNNNNGNNATTTCTTATAAAGTTATGGTAATTTCTTAAAAACCGGTTGGGGGAACCCCGGACTTGTGATACATCCATATATAGTTGTCATGTTAACTGCCGAGGTTCCAAAACTTAAAATCTGAAATTCCAAATCTGGAATTAAAATTTTGCCCCCAAATTTGAGTAAGTGGACTGATGAATTTTTTNGTCCACAACTAGCGTTTNAGTCATTACTTAAATTATANNTNCTNTTGACATTCGCTCGTGTGAAACTATGTCATT
GmaAffx.60859.1.A1_at	BU550962	At2g20370	3e-14	Unclassified - Hypothetical Protein NOT Supported by cDNA			ACTGCAATGCATGTGATTGTGTTTGCTGAGCAGGCTTCCTCATTGAAGACCCCTAGCATGGAGAGATGTTCTCTGCTTTTTACAGTTTTGTTATATAGATTTTTTCTTCTTCTGATTTCTGCCTTGTTATTTGCGTTAGTGTTTCCTAGATGTATTTTCCTAAATTAATAATTTCTCTGATACTATATATTTTCCACTTGATTCATATAGGAAATATAAACAAAATTATGGTTAGCAATGAACTCAAGTGTTCACTTGAATGGCAATATCATTTTGCAGC
Gma.4995.2.S1_at	AW830184	At5g13020	3e-35	Unclassified - Hypothetical Protein NOT Supported by cDNA			AGATTACACCATCTGTACCACCATCACGATCTTTTGGCGGACCTTCTCCTCCATTTCACCCCCAAACACTGACTGCGCCCCACCAACCATCTTCTGCAGCAAAACGTGGATCTGCTCCTGGGTCAAAGGGAAAGAAGCACAAACCTGGTCAAATATTACCTGGTGTATCTTCAATGAAGCAGTATCCTTCGTCAGGACCAGGTGGAAGGAATCAGGTACCTAATAGAGCTGCCATGGGTGAGNNNNNCGAGGGAGCATCATTTGATTCGTTGGTTGGTAGGAGAGTGCGGACAAAGTGGCCTGACGACAATAACTTCTATGAAGCTGTTATCACGAACTACAATCCAGCTGATGGACGACATAATCTGGTCTATGACATGGGGAGTGCAAATGAAACAT…
Gma.11105.1.A1_at	BI424146	At1g61770	6e-36	Unclassified - Hypothetical Protein NOT Supported by cDNA			GTCCGCTTTGTTCTATTACCGTATACCTTAGGCAAGCTGCTGTTGTGGACTGCCTGTTGGTTTTGGAGATACAAAGTGAAAAAGTACCCTTATTCCTTGGAAGATGCTTCTTATCTGACACAAAGATCCCTCAGTATTCCTCTCGATAGATGGAGAAATATAGATGAAGCAACAAAGGAAGATCTTGTGCTCAGACGCTNATGNNAGANANCANNTCTNNNNAACTNNGNNNCNNNNNNGCGGNANGAATCAAAGCGCAGAAGATAGTTGCATTAGTCGGCTCTGCCGCTTTTAAATTACTAAATTTTGTTGCAAATTGATTTTCGGGGTGGGGGTGATAAAAGCAGAATTATTCGTGGCAACCACGAAATTGTGGAATCATATACGTAGTTTATTACG…
Gma.5000.1.S1_at	BI968148	At2g47440	2e-32	Unclassified - Hypothetical Protein NOT Supported by cDNA			AGAAGGCTGCTTTGCAAGCTATTCAAGCACAGAAAGAGAAAGCCAATGAAGCTGCTGAGCTGAATAAGGTCGTTGAGAGTAATAGGAGCAGCGTGGAGAATACTAATACTAATAATACTCAAAATAGGTCTATGGTGTCTTCTTCTACGGTGAATCCGGCGGTGTTTCAGGGTGTTTTCTGCCGTGATCTTACGGTGGTGGGGAACTTGCTTTCTCAGGCGGGGTTTAACCGATCCATGCCGGTGAAGTATGAAGCTTTGAGCTGTTGATTGAATCGAAGTTGGTCGGAAATGGAAATGTTTGGTGGGGGGCTGTTGGAGATGGTACCAGCAGAGGGAATCTCTGGTTCGTTCGTTCACTTTTGTTGTNCAAATTATGCAAAGGAAAAAAAAAGAAAAA…
GmaAffx.84921.2.S1_at	AW101461	At4g07990	1e-05	Unclassified - Hypothetical Protein NOT Supported by cDNA			TGCTGAGGCCAAGTTCAAAGAAGTAATTTGTTCATATGAGGCCATACAACAGGAAAGAAAAAACCAGAATCTGTAATTGGCCACCTCTGCCTAACAATCCTGGAACCTTAAAGGTGAGGTATTCAAAATCATCATCAAAGGTCCTCCTTAACTTCATAAAATAGTATTATCATCCAGCTAAAATATGATTTTGCTGCTAGTAAATTTTGGGTAATTATCACATCATATCATATATTTTTTTTTTAAAAATTATCACATCATAAATTAATAATGATGTTGATGTGTTGTATTATAAAGCTGTTATCCTTGGATGCG
Gma.110.1.S1_at	BI945132	At3g06760	0.002	Unclassified - Hypothetical Protein NOT Supported by cDNA			TATATTGTCACAGCTGCACCTTTGACATATAGTGCTGAATCTGATCATAGTTATCCTTTTATCCCACCCTTGTAAGTTGTAAGCATCTTCACTGGAGATGTACTACTCTCTGAAAAACAAGAAGTTTTCTAGCTTAAGAAATGACCTATTTTGCTATATTGGCGTATGTTGATTCCCTGGACTCAGAACACTAGGACCTTATGCTCCCTTTCAAGTGGAATCTG
Gma.2269.1.S1_at	BI321941	At3g63500	2e-37	Unclassified - Hypothetical Protein NOT Supported by cDNA			GACTGAGACTGATGAAATTCGTAAACAAAAATTTGAAGAAGCCCAAGCATTAGANAGNGCACATCTGGAGTATTTGAACATGAAAATGAGAATGGAGACAGACATTAAAGATCTGTTATCCAAAATGGAAGCTACCAAAANGAGCCTTGCCATGTGATCANANNAAAANAATCTAGAATAGTACTTTCAGGTAAATNTATTATGTCCCATCCTGAAATTTGTAGNTTCTGATGTCACCANCTTATTGTTGTNAGCTACTTNAGTCCTGATCCGTAGTTGTATCTATTNNNNGTTGTAGTNCGTNTTGCTTTTNAGCTGCTAACCAAAACCTGTAGAGTNCATCAGTTATTAGTCTTNTGAAACAATNNCAGTTATGAAAGCAATTTAAAATAGATTATC…
Gma.4353.1.S1_at	BE822940	At4g14450	3e-06	Unclassified - Hypothetical Protein NOT Supported by cDNA			GTTGGCATCATCTCCGACGCCGATCGAGCTAAAACCGCCGCAAGAGCCGCCGCAGAGGGAGCCGGAGAAGGTCACCTTGTCGTTCAAGAAGTGGCAGCATCCTGCGGCTCCCTTCTGTTACGAGCCCGCTCCAATGGTGCCGCCCTTTGTTCCTGTGTAGATGAACGAACGAGAGAGTTTTAGGATGCTATCTAATGGTTCATATTTAGAGAGAATGAAGAAGAAGATATAACGCTGTATTTTTAATTAATTAATTAATATTGTTCCTTTCTTCTTTTTGTTGGGGAGAGGCTTTGCCTTATTTTGCACACGGGGGTATTTATCAATACCTGTGATTGTGAATATACACCCCCTCTGTG
Gma.15845.1.S1_at	CD397706	At4g17050	1e-114	Unclassified - Hypothetical Protein NOT Supported by cDNA			GGTTGGTTCAACTGATAAGCAGCCACTCCTTGAGACTCCANGCGAGATNTTTGAACTGAGGAAGCTAATNCCAANATCTTTNGGCATATGACTTCANTATCCACATAATGGATTTTCAACCTGGAGAATTTCTTAATGTGAAGGAGGTCCATTATAACCAGCATGGTTTGCTGCTACTGGAAGGGCAAGGCATTTATCGTTTGGGTGATAGTTGGTACCCAGTTCAGGCTGGTGATGTCATTTGGATGGCACCATTCGTCCCACAATGGTATGCTGCCCTGGGAAAAACAAGAACACGTTATCTTATATACAAAGACGCGAACAGAAGCCCACTGTAACCAACGTTGATGGACTTCAGATGAATGATATGGATGATAGTGACCCCCTTCTAATGATGTA…
Gma.5972.1.S1_at	BE800605	At3g09860	2e-46	Unclassified - Hypothetical Protein NOT Supported by cDNA			GAAACGCTTATCGTGGCGACCCGGGCGTGCCCCATTCGGACCCGGATCGCTTCGTCAACATATGGGTCGGATCCGCTGCCTTCGCTGTTCTCACATATTTCAATCCCTACATGTGGCAGCTCTCTAATCAGTTCAATTGGCATGACAAAGCAATGTTATATGAGCAATATCACTGGAAACAGGCAAGGAAGAAGAATCAGCCATATGAGTTCTTGTGGAACAAGACCTGGGACAAGAACCACCGGGAACATTACTACTACAACTGGCCTATTTACTTTCCTTAGGCCACTTCTATTTCATTTCTTGCATACTTTGTCCTAT
GmaAffx.83895.1.S1_at	BU084669	At3g13940	5e-58	Unclassified - Hypothetical Protein NOT Supported by cDNA			AGCTTTCCTGCATATTCTCATACATCAATCATCTTATAAAGTTCAAAGATCAGCATTCCTTTGATGTTTTGTCGGCAAAGGGCCATAAAATCCCCAACATTCTGCGTCATAAGTTTTCAAATATGTTTGCTGTTTCTGAATCAAAAAGGCTGCCCCCTGAAAAGATTAGTCTTCTCATTTGTTATGTNTTGGTGCTTACGCTTTTCTCTGATGAGTTCCGAACTGACTACACAGATATTGCAAAGGATCTGAGCATGAACATACTNGCCCGNGAGACAACTCTATGAGCATTTGGGTTGCAAAATTTCCCGCCAGAAAAACATATTTTATGCCACACTTCCTGTCCCTCTTAAATTTCCTGAGTTGAGGCAGAGGAAGCGGAAAAGGTAGATAGATCAC…
Gma.8710.1.S1_at	AW733248	At3g25400	2e-32	Unclassified - Hypothetical Protein NOT Supported by cDNA			GATGTTTCTCTTCAGGAACTTAGCAAAAGGCTTGCTGAGTTTGCTGAAGTAAGAGGATGGGATCAATATCACAGTCCCAGAAATCTTCTTTTAGCTCTTGTGGGAGAGGTGGGAGAGCTTTCTGAGATCTTCCAGTGGAAAGGAGAGGTTGCAAAGGGATTGCCCAATTGGAGTTCTGATGATAAGGAGCACTTAGAGGAAGAGCTTTCAGATGTTTTGCTTTATTTAGTGCGTCTTGCTGATGTTTGTGGGCTAGATCTTGGACAGGCTGCTCTGACTAAAATAGTGAAGAATGCTCAGAAATACCCAGTTACTAGTACTAATTAATCACACCAGCAATTCCACTTACAACTAGCAATTAAGCTGTTAATTTCTCAGTCTTTTTCTTCATGTACTAGT…
GmaAffx.13701.1.S1_at	BG882564	At3g52240	0.0007	Unclassified - Hypothetical Protein NOT Supported by cDNA			TTGACCCGTTTTCCACGTATTGGATGGCAAGAGATTGATCATCAGCAGGCAAGCTCAATGGTGTGCCAGAGTAAGGAAGACTGGAGAAAAAGTGACCATCAGAAGTTCTAGACATGGCTCTATTAACATGAAAGTTTGAACCAAATCCAGCAGTTGAATCATGAACATTGAAACTAGCAGTTGCTCCAGAAAAATCTGTTGGTAGTCTAAAGAGACCAGAACACCCAACAGGAACTTCAAATCTATCCTCACTTTTACTAACAGAAGCAGAGGGTTTAGCAGTGTGCCCACCCTCTACTAGTGGCAATCTCTTGAGTTCCTGTTGTAGGGATATCCTAGCTTGTTTAAGTGATTCAAGTACACCATTGAACTTGTGAGGTTGTTCATGAGTAACTAATG…
Gma.8021.2.S1_at	CA782136	At3g54500	5e-45	Unclassified - Hypothetical Protein NOT Supported by cDNA			AACAGTCATTGCAGAGACTCCTCAGAGAATGCTTCTAACAATGATCTAGCTGATGCTGGAGATCAGGTGCTTGAAGCCTCTCAATGAAGAAAAAGGTTCCCCAGAAATTGGAGATATGCAAATGTTCTCTGTTATTGTCAGCTGTCTGGATCATAATCAAGGCAACCGTTAAAGTCTATCATCATATAATCCTGAACAGCTGTTTCGCATGTGCATGTTATCATTAATATTTATGTTTCGTCTGTCAAAATCTTGACAATATATGTATCTCAGCATATGAACTTACTCAACTTGGTCAGTGCTGACTTATGTTAATAATTACTTCAGACTTGTGTAGTAGTAAATGCTCCTAATGTCAAAGACTACGTCAGATTTGTGTAGTAGTAATGCCACTCATGT…
Gma.4672.1.S1_at	AW309912	At4g25550	1e-105	Unclassified - Hypothetical Protein NOT Supported by cDNA			GACAATGTTCAGAGATACGGGCCAGTTATATCCACCATTCCTCAGCAGCTATCCAGATTCCAGTTTAAAATGATCACTAATTGAACATAAATTTGAAGCTTACATGCTGATAATTACTACTTTCATTTGTAATTTTCGTAACTAGGAATTATCATTGCATAGACTGGCTAGAAAACTGAGTTTTGAAGTGAGTTGCTGAGTAGAGTAGTTATGTTGTGACATGGTTTGTCTGTATTTCATTCATTGTACTGTGGGTTGATGTCGGTTATCAACAATCAACCCAAGAGGGAATCAAGTNATCAACTAGTAGGCTATATGCATCTAATGCCTAGTAGAAATGAAGGTGATCAGGTANNNNNNNATCTCATGTCTGTTGCTTCTGCCCTGCTCAGGTTGCCA…
Gma.10758.1.S1_s_at	CD411519	At4g26630	2e-10	Unclassified - Hypothetical Protein NOT Supported by cDNA			GAAAGAGAAGTCCAGCCTCAGTGATAATCAGTTACGTGATGCAATCTGTGAAATTCTTAAAGAAGTTNNNNNNNNNNNNGCNNNANNTNCNGNNNNNNNGAGGCAACTTGCTAAGCAATTTGATATGGATCTCACTCCAAGAAAGGCATCTATAAAGCTGATGATTCAGGAAGAGCTGACAAAACTGGCTGAGGAAGCAGATGATGAGGATGGAGAAGAGGATGCTGAGAAAGATGAAGCCCCGTCTACAGGCCAGGAGGTTAAAGCCTAATTGAGGAGTAGACCGGACTGCTTGGAGATAGGTTTAGCAATGTAATACTATAACCCAAGTTATGCATGCTTCATCTGTACACTTTGATGGGTGGTAGTGGCTGTAACTTATTTTTAGCATCCATCCAT…
GmaAffx.19881.1.S1_at	BI317210	At4g30790	9e-43	Unclassified - Hypothetical Protein NOT Supported by cDNA			GAGATAGCTGCCTTTGTGCTCACTTCAGCTGGGCATTATGAGGCAATTACTAGGAACTGCTCTAACTACTACTTATCTGATGAATCTGTAGCCCTGTTTGCAGACCATCTTCCTACCAGACCTAACTACATCGTTGGACAAATTGTGCATATTGAACGCCAAATTGTGAAGACGCTGCCGCCTCGGCCTGAGCATGGTAGGGCTGATAAATTTACCCCTGACAAGGGGGCTGACTGGTTGACCTTGAATTCAGGATCAACTCCGAACCCTTACGGTCTCCCTGTTGGCTGTGAATATTTCCTAGTGACAGTAGCCATGTTACCTGATACCCCCATTCATTCATCCTCTCCTTCCTGATCCTGCTTCACCCCTGGCAGATTAGACGTGATGGAAGAATTT…
Gma.772.1.S1_at	BE819852	At5g12010	6e-26	Unclassified - Hypothetical Protein NOT Supported by cDNA			TAATTTTTTCTAGACTTCTTGGGATATCACACTTTCTCATTAATTCTTTTGGCTATGCCTTATTATTATAGTCACTTGCATTATAATAACATTCTCATCATCTACTTCTTATATGTATCAA
Gma.1442.1.S1_s_at	CD407234	At5g12240	8e-08	Unclassified - Hypothetical Protein NOT Supported by cDNA			TTAATCAACAAGATTCATTTTGGAGCAAGCTAAAGTCNGAGGCTGCTAGGAAGGTGGGTGCAGAAGAAGCGGAGAGATTTTGCAAGNCNTTCCAACAAATCCATAAGAAACTAGTCAATGAAGAGTTGAGTTTAGATGCTGCTCGAAGCTTCTTAAANTCATCCTAGAGTTCTAAAGAATCACGCATGCTTTCGACATTTCTTNNTGATTNAACAATCAGCCNNNNNNNNATNGTAATTCTTTTGTACTGTATCAAAGTATT
GmaAffx.45144.1.S1_at	BI471006	At2g30630	6e-21	Unclassified - Hypothetical Protein NOT Supported by cDNA			ATCAGAATCTGCCATATCCCAAAGATATAAAATGCTTGGAAAGGATAGGCAGTGTAAATGTTGAAGCTGATTCCATCTACGAACTTTACAAGGAACCCAGCCCTATAATGGAACCAGGTTCTGTTTGGAAAGACATTGTTCTTTCACCTTCAAGGTCTAATGATCAGAAGGAATTAAAGGAATCCATACAGAAAATAGAAAAATTCATCAGAAAACGGTAACCATTTAATATTGTTGCATGATATGTTCCTCCCAAAGCCAAGCTTTGGAGTATCTAACAAAGTTAAGAGTTACAAAGTTTTGTGTTTATCTGCTATTCCTATGGTTTAACGACCGAAGAAGACAAAGGGAGAAGGACGAGTTGTGCAGTGAAGTCGTTTTCTTGGCATCAA
Gma.4406.3.A1_a_at	BQ081488	At1g77710	5e-11	Unclassified - Hypothetical Protein NOT Supported by cDNA			GATAGGGTCGGTGCAGCTGGGGTTTAACGGGACGTTTGATTATTGGCTAATTAATTATCTTCTTCATTAT
Gma.16675.1.S1_at	BU547296	At2g25310	1e-76	Unclassified - Hypothetical Protein NOT Supported by cDNA			ATTATGTCCATTGTGAAAAGTCCAATGGGTCTGATGATGGGATTTATGCTGATTGTTGTCTTCCTCATGCCCAAATTAATGGAGAACATGGATCCAGAAGAAATGAGGCNTGCACAAGAAGAAATGAGAAATCAAGGAGTTCCATCTTTAGCAAGCCTGTTACCNGGTGCTGCAAGAAGCAACTAGGTGTANNAGTAANGGAAAANCANTGAGCAAGTTGGTTACCCCAAGCAGGAGCTGAAAAAATATGACATACGATGATTGGAGAATTTTCTTGTGACAAATTGATGCCGATGGAAATCTTTTGATTATTTATGTTGTGGATTATAAAAAATTTGAAATTTCTGATAGAGAGGTTTATATGTTTGATTTGAACAGTGGGGAGTAGGCAGAACTCGT…
Gma.1761.1.A1_at	BQ454208	At1g15780	0.0001	Unclassified - Hypothetical Protein NOT Supported by cDNA			TGCCGTTCCATGCAAACATCTTTTTTCCTCTTAAATTTGCCNAAACTTGTGTCAATCATTGGATACGGAGTTTTTGGGTGCANGNGAAAAGCGATCATGCATCAGGTCAAATTGGTCTCGTTTCAGTGAATTGTGTATTCAGTTAGTATCCCATTTTCTTGCTTATTTTTACGCTCAAATTGCGATGTTTGCCGCTGCCTAAGACGCTCAATGTAGTAAGATTTGTGTGACTTGAATCAAATTGCCTTCACCAAGGCTTTGTTAATAACTAATATAGTAGCTCAACAGTAAGGCCCGTA
Gma.1225.1.S1_at	BU081583	At1g18730	8e-38	Unclassified - Hypothetical Protein NOT Supported by cDNA			ATGGCTTGCCAGATTGGCCACTGATGGCAATTATAGTAGAGCAAATGGAGGGGCAAAGAGATTTGATCACTGAGAAAACAGTTTCCCATCTTAGTGATCNGGCAATAAANAATGTTTACTCTTGGTACATAATGTTCACCGTTTGGGGGTGCTTATTCTTTGGTGCCATGAAGGATCCATATTACGACTCTGAAACATATAGGGGAGATGGAGGAGATGGAACTGGCAACTGGATTTATGAAAAGCAAGATGCTATGGAAGCAGAAGCCAGAGAAGCTCTGTGGCGGGAGGAGTTGATTGAGGAGATAGAACAAAAGGTTGAAGGGTTGAGAGAACTTGAAGAAGCTGGCAAGAAGAACTAGTCAACTGATTCATACCTTTGCTTCCACCCATTGACCA…
GmaAffx.34473.1.S1_at	BQ610455	At1g47330	3e-15	Unclassified - Hypothetical Protein NOT Supported by cDNA			AAAAGCGACATAGAGGTTGTTCATATTGCATCCTGGACCTTGATAATNCTCCCCTGCCAGTGTTTCCNCCCAATGAAGTGGTTGTTGGTGTTATTACAATGGAGGATGTCATTGAAGAGCTTCTTCAGGAGGAGATACTAGATGAAACTGATGAATATGTCAATATCCANAACAAGATNNANGTTAACATGAATGCTTNTAAGGAGAAGGCTCCTGATNCAAATNTGTTGCNGCCTTCNCAAGCAGTTCAAGGACACACNCCAACTAATTCAATTTCTACAGCTACTTCTGCAACGGGCTCACCTACCACAATTGATCTAATCTCNGAAAGTGAGTCACTAAGGAATCNATANTTCATAANGAATAAGAGAANGACATAGGTTTGTNTTTNTGTTGAAA…
GmaAffx.81156.1.S1_at	CA819098	At1g62870	1e-91	Unclassified - Hypothetical Protein NOT Supported by cDNA			ATATTGCAGCTCATGCCAAACTTGANAGGAGAGACTTTTCTANNGNNGAAGANAAGGANGCAGAGCTGTTTGNCNTGTCNNNNAGTGAGGATGNCATGCTNGNTGANGTNTATGCTGATGCTCCCTTAGTGTAATGTGCTTTTTTACCTCTTATAGAATTGTGTAATTCTAGGATTTATCAGATTCTTTCAAGAACTCTTCTATTATTCCCTTATTACATTTGGTGGGAAACTTTTCATCACTTTGGGGTTGAAATAGAAGGAATATTAGAAGGACCAAAAAAAGCATGTTGTTAGCGACTGTGTT
GmaAffx.261.1.S1_at	AW705947	At1g67440	8e-62	Unclassified - Hypothetical Protein NOT Supported by cDNA			AATTGCTTGCATCTGGGTGAACCTGGGTGCATTGTGAAGGGAGATTGGGAAAGATATTCCTACTATTTNCAACTTCTTGATGAAATCAGAATCAGGGAGGAGTTCCAGCTCAGGACNTTTGGAACTAAAAGNGAAGGGGATGTAAGGTTGAAAATGGGAGACATGGGTGTTCAGCAAGCAGAACCACGTTTGGAACCTAAGAAGCATAGAAGACAATCTCGGAAGAGGATTAACCAGTCAATTTTAGATGAATTGGATGATGATGACGACAATTTGCTTGATGAGGAGAATGATCCCATTTTAAGGGCGCTAAGGAATGAAAACTCTTAGAATTTCGTNNATCCCCAGAGNACTCATTGTANAATAGTTCCTTTCCGCGCTTTNNCTTGTATNCTCGGA…
Gma.15891.2.S1_s_at	BI316425	At1g22800	4e-30	Unclassified - Hypothetical Protein NOT Supported by cDNA			ACGGCACTGTACCTGCAACATTCCAGGTTATATACATGACGGGGTGGAGAGAACATCCTTCTCAGCAGAAAGCAAAAAGAAGGGGATCAGCCACTATATCTTTCAACGATATTCAGAAGCAATTTGGAAGCCAAAATTGATTGTCCTTCCCCTTATTTTTCACTCTGCATATTTTAGTTTAATTAATATACTTGGCGCATTGTATGTGTGGGTATACTCTTA
Gma.12333.1.S1_at	CD391778	At1g72170	4e-27	Unclassified - Hypothetical Protein NOT Supported by cDNA			GGTCTCTGAAACTGCTACTCAGAATGTGCCGGATTCTGAGTAGAAGCTACAACGGATCCTGGTTCCTGGTTCCTGGACAGTGGTGAATCAGAATTTTCTTTTGATTGTTGATGGTTCCATACAGCATTATTGCTCTTCAAAATGTTGCACTACCATAATTTCGTAAATGAACATGACGTATATTTTATTCCCAAGCTTTTACGCTTTTGATCTCCTGTGATCTTACGCAATGTTTATGTTGAGAAGGATTGGAAAAGCCAAGGAACCTTTCTTCANNNNNNANNNNGTATTCGCTCTACTTTGAATCCGATTTAAGTATATTCTAAAATCGGATTGGTGAGTTAACTGAC
Gma.9918.1.A1_at	CD416947	At1g12640	3e-13	Unclassified - Hypothetical Protein NOT Supported by cDNA			CTTGCATCATATGGAAGCGTGTATTACATTGGAACTATTGTTCCTGTTGTTATGATTCTTCTTGGTAAAGTAATTAAACCTGGAAAGCCTGCCAGATCTAAAGCTCGGAAGGAACAGTGAGGTGACAATGCTGTTTATTCTTGTTGGAATTTTTGAAATCAGATTAGGATAATGCGGCAGAAGGGTTTCTAGTTCCCACAGGTTTNCNNNNNCTGGTTTTCAACATTGTTGTAACAGCTCCTTTGGTCTTGAAAATGGTTGGGCGCTTTCATACTCTT
Gma.4046.2.S1_at	BU549243	At5g64550	2e-12	Unclassified - Hypothetical Protein NOT Supported by cDNA			GGAAACTCCAGCAAAAAGACAGCACCTGATACCCAAGGAGGTGTTAGTTCCGCTCTCGATGAAATCACCNTCTTATTCAANCTTCTTGGCTGCCAAGAAGNCNGACCAAGACAGAAACTGCCAAAGCTNGGCNGCNGGCNGCAGNNGTGCTCAGAAAGGCNTNGANTTTAATCTNCCGGAGGGCAGGGTCCACGGCGGCGACCTCATGTTGTATTTTGGAGGGAATCTCAAAAATGCACTNGNCNGCATCTGAAATGGGNGAGGGAGCCNGGTGTCNCGCAAGTTGTAGATTCATTTTAGGNATTAGGGACCATTTCCATCATGGAATTNTGNATAANGCTTTGTTGCTGCTTGTTCAATAACTNTGTGTATAGTTGGGTGTTNATTATTATTANNNGC…
GmaAffx.62542.1.S1_at	BE659136	At1g18290	0.0002	Unclassified - Hypothetical Protein NOT Supported by cDNA			AAGGTTTACCTGCTACTGCCGGTGAATAGGGTCAATTCGAAGGCTTCAGAGTTTGAGATGGCTCTTGCGGAAAAACAGAGTGGCCACACAAAGAGGACGAGGGGTAATAATATGGCGAAGGTTTCACCCTCTGTGTGTCCGAGGTTTGGGAACCAAGTACGATGGAATCCCGTTTTGGATCCTATCTTTGAATAATAGAATCGCCCTCATCTCTCAACCAATTTGTCTTCCTCCTGCACTTCACACTTGACACTATTGTGTGTTCATTTTTTATTAACTTTCAATTAAGGCTTTTTCTACACTAACATGGAAAGATGGATGGATCAAATTCATTTAGAATTTAGATGTCGACCAATATTTGTTAAACTCCTGGTTTATTCTCATGGATTTCGATTTTGT…
Gma.13644.1.S1_at	CD412201	At3g49200	1e-30	Unclassified - Hypothetical Protein NOT Supported by cDNA			CAATGTGCCTGGTCCTGTGGAAGAAATTAGCTTCTATGGTCATCCCGTGGCATACATTGCTCCTAGTGTATATGGACACCCACTTGCACTGACCATCCATTTTCAAAGCTATGCTAACAACATGACCATTTCTCTAGCAGTGGACCCACTTGTTATTTCGGATCCTTACCTTCTTTGTGATGATTTAGAACAATCACTCAAACTCATTCGTGATGCTATTCAGAAAAAGCACACTGTCGATGCTGTCTAATAG
Gma.12483.1.A1_at	CD393502	At3g51230	0.0009	Unclassified - Hypothetical Protein NOT Supported by cDNA			TGTGCTGAGTCTGATGTGATGCGTTTGAAGGGGTTGCCTACACCCAAAGGAAAGCACCTTCGTTTTCCTGAGGAGGAAGAAAATTCTGACTTGTGATTTTGATGCTGTGAGTGTTGTTTGCTTTTGGTTGTCTTTCTTGACACCAATGTTTTGGGTTGGGCCATTGGTTAATGATTGCTGTGATTGATTGGAAGCTAATTGCTG
GmaAffx.71032.1.S1_at	AW278168	At4g29110	1e-08	Unclassified - Hypothetical Protein NOT Supported by cDNA			CTCTGCGAGACTCCGACCATGACAACGACCACCAGGTCGATAAGGCGGCGGAAGAGTTCATAAAGAGGTTTTACAAGGACTTGAAGAAGCAGGATTAATTATTTATTTAATTAATTAAGCCTATGCCTATCTACCTTGTTTAATTGTCCATCTCTACGTTCCATATTCTCCCTTTGTTAATAACAAGTGTGATTATATTGTTGATTTACCAACGTTAGTTCACCATCATTTTTGGATATTTCCATGTTTTTGTTGTTGTCCCACTTCTGATTTA
GmaAffx.26598.1.S1_at	CD393521	At5g01140	5e-07	Unclassified - Hypothetical Protein NOT Supported by cDNA			CACACTCCTAATTATTGGTATGGCACTGTAGCAGGGAATGATAATAATGAGGGGCGTACAATGATTTCNAAGAAAAAGGATATGTTACAAACAGCAAAANAACTGAAACTTTTTGACCCAAGATGTTCTGATGGAGCAAAAGAACCTGGTGTGGGATTTGTGAAGAGGCCNTGTCTATTTGTTGTGANGGATGATCTGGAAGTGANACAAATGACAACTACTTCTAGCATTGAGTATCTGAANNATNNNGGNGANNANGTCAAGNTGGGTGATTTGGAGGAGCATTTGGTGGAAATCAGGTCAAATGAGGTAATGAACCTGTTGAGGGCTTCTTTGACATCCAATGAAGCTACTTTGACACGGAGCCTAGGCTGNCTATTGATGAAGTGGAAATGCCAA…
GmaAffx.37013.1.S1_at	AW349979	At5g35110	6e-15	Unclassified - Hypothetical Protein NOT Supported by cDNA			GAATAATTTGAGTCCGGTTCGGTTGAGGTCTTGGTTAACTTTTTTTTTTTTNNATCTGTTGAAGGTCGTCTTGGGATTGTATTGATCATCTTAAGCCATTTTGATTTAGGGGTTCCTGATCAATTCGGTTGGTTCTGAATTGGACGTCCTCATTTCT
Gma.9921.1.S1_at	AW309812	At1g33520	4e-11	Unclassified - Hypothetical Protein NOT Supported by cDNA			GATTAGGGTTCGTTGCCAATGCTTCTGGCAACAATTTGAATCACTGCGACCATCATTTATGTAATTTGCAGTTCTAGTATTCACACCTTAGTGGTGGGTTCTCTAGTAATAGAGATATGCCGTACAGAATCAAGGGTCTATTGGTTACAATAGTATTATTCTCTCTTTCTCTAATCATAGCTCTCCAAGTTCTCTTTTCTTTGGGTCAATCCCTATGGAAGCTTGATTCCTAAGATCTAGTACGTTGAATCCATGCTCTGATTCTGTTTCTTTTAATTTNATATTTGTTGTTTCCAAANNNNNNNNNNANNNNNANNANNAATTGGTGATTCTATGTTGATGTTGTGGGNTGTGTGGTTCGTATTGTTTACAGAAGGCTGTGCGTTGCCAGTAGTGTA
GmaAffx.491.1.S1_at	BE659408	At1g51540	3e-25	Unclassified - Hypothetical Protein NOT Supported by cDNA			GGAGAAGTAGTCCAGTTTAACTTGAATACTTTGAAGTGGTCAGTGATTGGAAAATTACCATACCGGGTGAAAACCACTCTAGTTGGATTTTGGAATGGATGGTTGTATTTCACTTCAGGACAGAGAGACAAGNGACCTGATGATCCATCACCAAAAAAGGTCATTGGGGAGATGTGGAGAACAAAATTAAAATTGAATGAGTGAGCAATTGCTGTAGAAGCGTCTTTCTNCNGAAGCAGAGGTGAAGAGGCCAAAATATTGCACATTCTTTGTCAGTACAATATTCATTGTTGTAATTCACTGAGAATGACTGTAATTTAATTCGACATTAACAGTTGTCACCGACTCTTGTATTTCTTTACCAATCGGCTTTTGTATTTCTTTCCCCGCATATTT
GmaAffx.92074.1.A1_s_at	CF807799	At1g18270	6e-70	Unclassified - Hypothetical Protein NOT Supported by cDNA			GTAACGTGCATGGAAAGTACCCTGCAAGTGGTCCAAATCTGAGATTTGATCTGCTTAAGGAGCTGCATGCTTTGAGCCTGAAGAAAGGAATTTTTCTGGTGCTTCATGGTGCATCTGGTTTGAGCAAAGAACTTGTTAAGACGTGCATACATCTTGGTGTTAGAAAGTTCAATGTCAACACCGAGGTAAGAAAAGCATACATGGACTCCCTTGTTACCCCCAAGAACGATCTAGTTCATGTTATGGCCTCTGCAAAGGAAGCCATGAAAGTTGTGGTTGCAGAAAAGATGCATCTCTTTGGTTCAGCAGGAAGGGCATAATTCCTACAAATTTACTAGCTAGGATTATTGGTGACTATCAACTTCTTATTATTTTGCTATTATGTTGTCTTGTAGTAAG…
GmaAffx.75942.1.S1_at	AW703655	At1g51580	2e-39	Unclassified - Hypothetical Protein NOT Supported by cDNA			GATTTCAGGTGCAATTGTTACGGTTTATGATCCTTCCGTTGGTACAAGTGGAGGGAAAGTTGTCATATCTGGGACACCAGATCAAACCTTTGCAGCGCAGAGCTTGCTTCAAGCCTTTATTCAAACGGGACAAGCAAGCTGATGGAAAGCTGCATTTCATCATCAGTTGGTGCCATGAATGGTGTACATAGATGTCACACGACAACCTTCACTTTGTGAATACGGATTCACTCTTTTTTCTTAAAGATAATGCTTACCTCTTATAGACTATAAACACAGATTTTGTTCTCTTTCTCTCCCTCCTTCCCCCGCACNNNNTNTCACTTTTAATTTAAGGTTCATCACAATACCATTTTGCTTCAAGACCCATTCATATT
GmaAffx.3704.2.S1_at	BI320426	At1g01490	3e-25	Unclassified - Hypothetical Protein NOT Supported by cDNA			ATGCTTGTGTCGTTTGTTAAATACCAAGCTGTGGAAGAAAACATGAGGAAAGGAAGACATATATAAAAATATATATCAAACTTTCTCTATTTGCAATGGAATCAATCAGGTCAATTTCTCTTTCATGAATCCTGGGAGTTCATAATATCAAGATAGAAACAAACAAACAAACTCCTTTGTATATATTTTGGNTGGTGGTGTCTCCTCTAGTTTTGTTCTGGGACATTAGCAATGTGTAGAGAGTAGGAATAAAATTTTGGGAGATTTGTTTTGACAATGATCACAAATGTAATCATATACTATTATGTTAATTTCCTTTTTTTTTTTTTAAGTTGCTGCCTGCATGTATACAGTATTAGTGGAATCAGCAATTAGTAATTTTGTACGTTGCTGATGCCA…
GmaAffx.77778.1.S1_at	AW185540	At3g11920	4e-11	Unclassified - Hypothetical Protein NOT Supported by cDNA			AACTACTTAGATTCAGCTGACTCAGAAGTATTGTTGGACCTACTTGCTACTTCCGAGTTGAAGGTGACATATCAGCCTTATGACTGGGGCTTGAACTGCTAGCATGGGCTACCAAAGTTCTGTAAATATGTCACCTAGATTACTGATTTTCCGTTATACAGATTACCACCAAAGTAATCAATGTCTTATGTTAACTTTTCTGCCCATTTCACTTGCCTGTATAGAATGGNACACGAGGAAGACAAAAATAGGTCTGAGGAAAATATTTCTCTTATTTCCTGAATTCCTGTTCTATATGTACCGTCTTTCTACATCTTTTGCTCTTTATTGTTTGATGCAACTTATGATGATCCATTACATTTACTCTGCTTGAAGAGCTTGAACTTGTAATGCCTTTCT…
Gma.11224.2.S1_s_at	BM091821	At3g07560	7e-37	Unclassified - Hypothetical Protein NOT Supported by cDNA			GGTCCAAATGGACAACCGTTGCCTGGACCTGGACCTGGACCTGGACCACACAATCCTTCCGGAAATGTAAACTACATCGAGGCACCAAAGGCTGCTCCTAGTGGTTCTTGGGACAACGTTTGGGGAAATGACGCAAATCAATGATACAGTATGTTGTTCTGCTAAAAGAGTTTGTCCAAATACATTGAAAAGAAGAAAAAAACAGCTGCATTCATCATGAAGATACTGAAACTGCAGAAGTCATGTGTATCCTGGGTTTAAAATTCAGTTTGCTATTTTCTCTTTGCTTGCGTTGGCTCTTGATTTTACTAGAAAGGGGATCTTAAATAAGATACCATCCCTGCATTATACCTTGTAAACATTTTCTTTGAATCTGCAGGAAGCTGCTATTTTCTCCTT…
Gma.10114.1.A1_at	CD411220	At5g64680	4e-09	Unclassified - Hypothetical Protein NOT Supported by cDNA			TGTCCATTACCCTGGTCCTAAAGAACTTGAAAAGCTCAATTCAACTAACGCAAAACATGCACATGGAAATTCTTCTGGAGTCACTGGGACAACTTCATCTCGATATTTTCCTATGCAAAGTGGTGGAGCAGCTTCATCAAAAGGTAGCAGACAGAGAAGCTCTCTAACTGAAGCTAGTGAGCCATCAAGTATTTCAAAAAGAAGACACGCGTCTAAATCTAAATCCAACTTGTCCGAGACTTCACATGAGCACAGCACTGGCATTTCGTCCATGTCCCCNAATCATTCTCATGAAGGAAAGGCAAAGAGAAGAAAACATAAGGAATAGTGTTTCCTATACTCGCCATTGGCCTATTTAATAGTGTAATATTTAGAGGTTACATTCTCCCAGGCCTTTAA…
GmaAffx.73818.1.S1_at	BG044238	At5g63910	1e-29	Unclassified - Hypothetical Protein NOT Supported by cDNA			ATGTCTTTGAAACTCCCTTTCCTGTTGACCTTGTTCCTCGCACTCTCCCAAGCTCAACCGCATTCCGATGATCCACCGCCGCCANCCTCCTCCAACGTCTGCGTCATCGGCGCTGGCATCGGTGGCTCCTCCGTCGCTCACTTCCTCCGCAAATACTCGCCGNCCTCCACTCCCTCCACCAAAATCCGAGTGTTCGAGCGCAACGGCCGCGTCGGGGGACGCATCGCCACCGTGACGGTGGCGGGCGAGACCTTCGAGGCCGGAGCGTCCATTCTCCATCCAAAGAACCTGCACACAGTGGATTACGTTAAGATCCTGAAGCTGAAGGTCAAAGAGCCGACCGCGTCGGAGGATTCCCTCTCTCTCGGCATTTGGGATGGGAACAAGTTCGTTTTCA
Gma.5330.1.S1_at	AW705639	At1g62280	1e-57	Unclassified - Hypothetical Protein NOT Supported by cDNA			ATATGCCTTTCCTTTGGTGCACAAGCTTTGCTCTGGAAGAGTTTGAGTAAACACAACAAGGACTCACAAACTCTCTGGCATGGATTCAATTTGATGCCTTCCATTGCGTTTCTACTACTTTGGTGTGTGGCACTGCTCACTGCCACTACTTTGTCTTTACTTTACGTGCTCAAGTGCATCTTTCACTTGGANATGGTGAAGGAGGANTTCTCACATCATGTTGGAGTGAACTGCATGTATGCTCCTTGGATTTCTTGGCTTCTCATGCTTCAATCAGCACCCANCATCNTTCATTCAACTTCTTGCTACNNAGTTCTTTGCTTGGCCTTTTCGTTTGTAATATTGCTGCTTGACATAAAACTATATGGACAATGGTTCACAACTAAAAAGAGGTTCCTG…
Gma.15224.1.S1_at	BF067623	At2g26210	1e-44	Unclassified - Hypothetical Protein NOT Supported by cDNA			CAAGCAAGGACTGTCTTTATTACATNTGGCTGCAGTCTTCAATCAAACTGATATAGTTTTCATTCTTATGGATTCGGGGGCAAGCCTGGAGTNCAAAAATGCACAAGGAGAAACACCTATAGATTGTGCACCCGCTACATTGCAATACAAAATGCGAAAGAAGATGGAAGAAGGTGGAACAGTGGACCAAAGCATTTGAACAATCTATTACTTTTATCTGTGTTCTTTTTATGCAGTGCCCCCAATACTACCACTGTCTAAAGGTTCTCCGTTACCAGAACAAAAATTTCCGGCTTCTGTATAATTGTGACAGAGATGGAGTTCAATTCATCTTTCTGAAATGGCAGACTAAGTATGCAGACCTTTATTAGACAAATCTTTGTCAGCCACGCAACTTAG…
Gma.8066.1.A1_at	BQ611504	At1g54170	2e-16	Unclassified - Hypothetical Protein NOT Supported by cDNA			AGTATGCCAGGCATGCCCGTGGGTATTGGAATTGGACCTACTTTTGCTGGGCCACAACCTATCATATATAATCCTCAGGTAGCACAAATGCCGTCTCAAGGATATTTTCATCCGAATGCACCCCAGTATGGACAGCTTCTTGGTCATCCTAGGCAATCTTTATACATGCCGAGTTACTTGCCTGAAATGCAATACAAGGGACGAGATTATTGACGACTTGGCTATTCGTATTCTTGTTGGCAAGTCAAATCCTTGCTTGAAAAGAATAAACTAAGTGGTTGTCCTGAAAAGTTTTAAACGAGGATATCTGCAGCTGATGGAAAAATCTCTAAAGGCTTATATTATATATTACTGCCAGGTTCGCTAATTCTGGGATATAATTTTATGACCTTGTGTTAA…
Gma.7877.2.S1_at	BU546857	At4g02480	1e-157	Unclassified - Hypothetical Protein NOT Supported by cDNA			AGGCTATTCTTATATCACCAACTATTGATGTGGAAATCCCATCATTGGTTCTGCCTCTCTCTATTGTATTATATCAT
Gma.7877.2.S1_s_at	BU546857	At4g02480	1e-157	Unclassified - Hypothetical Protein NOT Supported by cDNA			ACAGCAGCTCACTGTCCAATACGAGAGATCTTGGAGAAGGAAAAGAAGGAGAGAAGCTTAGCTTTGTCTGAGAGCAAACCTTTACCTGGATTGTGTGGCAGTGGTGACATTCGTCCCTTAAAGATGGATGATTTTAGATATGCACATGAGCAGGTGTGTGCAAGCGTGTCATCAGAGTCAACAAATATGAATGAGCTACTCCAATGGAATGACCTCTATGGAGAAGGAGGATCAAGAAAAATGAGATCTCTGAGCTATTTCATGTAAAGCTCTCTCTCTGTATAGCATTTCTTGCTTAGGCTATTCTTATATCACCAACTATTGATGTGGAAATCCCATCATTGGTTCTGCCTCTCTCTATTGTATTATATCATCATAGGTTTTCTTTCCC
Gma.1466.1.S1_at	BG652928	At2g01680	1e-101	Unclassified - Hypothetical Protein Supported by cDNA			GTGGTGCTTTTCTAGCAATAGCTTTTGAGGTTGTTGGAAAGAAAACATGGATGGCTATCACCATCACCCTTTTGGGGGTACCTGTTCTAGTTGGCACTCTAGCAAGCATGTGCTACTTTGTTTTTCGACAACATTTCGGCATTTTCCGCAGTGATTCCCAGAGACGCATCAAGAGAGCAAGTGGAAGCAAATCTTTCTCATGGTCTTACTCTGCAAATATATCAGATTTGGATGAATACAATTCTGACATTGAGAAGATCTATGCCCTGTGAGTCAAGAATCAAGAGAAATGTTTCAACCTTTTAACTGAAACTGTTATACTACTGCCAAGTGATAATGTTAGCTCACCGGGATTTCATCATTCAT
Gma.7788.1.A1_at	BU549148	At1g66180	4e-40	Unclassified - Hypothetical Protein Supported by cDNA			TCCACTGCCTGGGAATCGGGAGGTCAGAAAGATTAGGTGCGGCCAGCAACATCATAGGCAACTTCCACCAGCAAAATCTATGGGTGGAGTTTGATCTCGCGAACCGCAGAATCGGATTCGGTGTGGCCGATTGTAGCAGATCATAGGTAAACGATAGGATGTGGTGGTGGTGCATGTCGCTATCATGTGTAGTAGGCATTAAGGCTCAGAAGTCGTTGTTGGGATATGAAAGCGTTGCATCTTTACTGTATAAATTAGGCGATGAGTGACGTTGGGATTTGGAGCGGTCTACCAAGGCAAGAAAAAGAGGTCTTTCGTGCGGTAAGGCTAAACGTCAACGTTTTGGACCCATGAGAAGAGTGCATGCACGTTTATTAATCTGAAGGGGACTCGTGTATA…
Gma.400.1.S1_at	AW350856	At3g09350	9e-45	Unclassified - Hypothetical Protein Supported by cDNA			GTGCTTCCAGGTGAAGATGCACCCCCTCCAGATGTTGCTAGCAAATTTTTTGAGCCTCCTCTTAGATCTTCGACTGCGAATCCATCTTCCAAGAAAGACTCAAACAATGAAAAGAAAGAGATCCCTTTGCTTTTAGGGTCAGGGCCTTCTCTTGCAGACACTAACAACCAAGGTTCAAATAGAGAAAATGCTAATAGCTGAAAGCTTGGATGCTTTCTGCTCTGTTTTTTTTTTGCCGTGCTTTCTTTCTATCTTATCATACAAGTAATTTCATATAGGCTCTTTTTTTCCCCTTTCTTTTCTCACCTTANATTGGTCTTCCATTGTATTTCAAGAATGATCTCATGGTATGTGACACTATAACTAGCCTTCCATTGCAGCGGTGAATGCCTTCAATTT…
GmaAffx.82962.1.S1_at	BF325207	At2g47770	8e-39	Unclassified - Hypothetical Protein Supported by cDNA			TTATCAGCTTACATAGGCTCCTCCTCCTCCAGTGCCCATTACGCTTCGAGAAGCCCCTTCTGGTTCCCACCCTCGTGGGCCCTACACTTGACGTGTCCTGCTTCAAGCTTCTTGATGGGTCTCTCTGCTTGGATGGTGTGGGCAGACGGGGGTTTCCACAGAAACCCCATGGCTCTGTTGCTTTACTTCACTCAGCTCCTCTTCACGGTGCTGTGGGACCCCCTTGTCTTTGCCCTTGGGGCAACACGGCTAGGCTTAATCTTGTGTGTTTCCTTATTTCTCACCCAGTTTGGCTGCATGCGCTTGTTTCGCCCTTTCAATCCCATCGCTGCTGATTTGATAAAGCCTTGTTTGGCATGGGTTGCTTTCCTCTCTATTCTAAATCTTAAGCTCCTTTTT…
Gma.11111.1.S1_at	BI315706	At1g53590	6e-38	Unclassified - Hypothetical Protein Supported by cDNA			AAGGTGAGTCTCCAACAGTTCCAGAAAGAGAACATGAATCTGACTCTTCTGACGAGGAATCTATTGCAGCTCAATCTCCCATAGATGTAATAAGAACTCCAGTTGGTTCTCATGCTGTGGTCTCAGGTAGCAATGGTTCCCCTGGTTCTGGGGTGAACGTGGTTCAAATAGTTCCATCAAACACTAATTTGGACAATGAAGCCACAGCTAAAATCACGAATGAAAAAGATGACCCTGAAAATGCATGCTCCCCTGACAGGTCTAGCCAAGAAGTTGTTAAATCTGCTGAAGTGGAGCATGATAAAGAGGAAATGGGGGCACAGATAAAAGAGATTCTATCGGTTTGTCCTACTGAAGAAAGTTTCAAGTAGCATATAGCATATTTTCTCCAGCATTTCA…
Gma.18017.1.S1_at	CD400774	At1g67730	9e-98	Unclassified - Hypothetical Protein Supported by cDNA			TCTTCTTTGGGCTGTGGCATTCTCATTGCCCGAGTTTGTTGTTGATGCTTGGCGCCTGTGGTTTTGCTTGGGTATTCGAAAGAGGGGACAGCGCAAAGAGTCCATGAAGAAGGAATAAAAGGATGCTTGGTTCTGATGTGTAGGCCAATAGACGCTACTCATCTGATAATATATATGCAGATTGTTAGCTGATTAAGGATTCCAAGTACCTGCTGTGTTCCTGATTTTCATCTTACTGTTATTACTCTTTTGTTAGTATC
Gma.4377.1.S1_at	CD393079	At3g61600	1e-117	Unclassified - Hypothetical Protein Supported by cDNA			CTATGAGTTTGCTGCGAGGTCTAGGCCGACNGAGGAATTTGTTAGCAAGTACAAAGGCAACTACGTGTTCAC
Gma.2627.1.S1_at	CD416014	At4g36910	7e-64	Unclassified - Hypothetical Protein Supported by cDNA			TCGTCGACTACCTGTGGTAGATGATGATGGAAAGCTGGTTGGACTTATTACACGGGGAAANATTGTTAAGGCNGCTCTACTATCAAAACGTGCTGGANAGTGGTGATNGTNTTTGTGAAAAGTTATTCAAATAGATTTGCTTGNAGGTTGTGCTGNNGANGGTCAGCGTAACCTCTATATTNATTAGCTACGGATAATGTTAATGTATGTAGTTATANCTANTNGATNTTTAGACTATTNCAAATGTATATGGCANNNGCCNAAGGAGGAGCTGNAGGCAACTTTTGATGGCCTTGTGAGATCTTAGTGGTGNATAAAAAACCATANNGAGNGANGTGATTTATCGATNACCTNTATTAAGTTNTCAANNTTGTNTCGGTNCATTGGATTGTTTNNNNC…
Gma.15923.1.S1_at	AW351028	At5g62575	5e-22	Unclassified - Hypothetical Protein Supported by cDNA			TTGGGAATGCCCTTACAATTGTTGTTGTTGCAGGATGCTGTTACGAAGTATATGTCAGAGCTTTTACAAGAGAGGAAGCTCAGAAACTGTAATGTCCTGAAAGTTCTGGATGAAGCAAATATTGGGAGTTAGTTTTCTGTTTTGTTTTATTATTGTGGCAACAACTTGGACGTTATGATTAGCAATGTTAGAATAAGCAAAAAAGCATTTGAACCAAAATTGCTTGTGCATTAATAGCTTTTCCACCATTCCAGATGTCTACTATCTGATGATAATGTTGATTGGCTGGTCACNAAATCTGTTGTGGCCTCAGCCTTCAGGTGTGAGANACAGATCTAATTCGTTCGACCAAGTTTGAGGG
GmaAffx.37994.1.A1_at	BU550627	At5g65650	8e-17	Unclassified - Hypothetical Protein Supported by cDNA			GATGACTTGGATTCTACCATTCTTGAAGACCTCGATGTGCTGGAAGTGGAAGAGAGAGAGAAGGTGGTGAGGCACATGTGGGATTTGTACAGTCACACGAACACGAAGTCCGTTGGATTACCCAAGTTTTGGTGGGAAGCTTTTGAAGCTGCTTACCAGCAATTGGTGAGTGATGTCCCTGCCGTCCGAGACGCCGCCGTTTCAGAAATTGCCAAGATGTCTCTGCGATCTCTTCCTATTCAAATTCAATCACACTCGAGCATCACGGCTTCAAGAAAAATAAAGCAAGCAAAGAGTAGGACAGGACAGTGACCAATAACTAGAATCTTTCGTTTTGCTTGTATACTGTTGGGCTAGCTGCTTTCACAGTGAAGCAAGCATTCCAAATAGTAATTGCCT…
GmaAffx.72771.1.A1_at	BG511599	At1g10240	3e-70	Unclassified - Hypothetical Protein Supported by cDNA			TCAGCTTTTGTGTGGTGCCTCACAAGAAAACCATCTTCAATTGAAAAAGACGCATAATGTGCAGCCAACACAAGTTGTTCTTGAAGCTTTGAGAAGGCAAAAGGAGTGAGGATTGTGGCGGCGTGTGATTCCATGGGGGCCCCTGTTTTGAGGCAAACATTTTGGAGATTCTGCTGCATGGTTTGTTGTTATCCAGTTTGATCTTTAAAATCCACAGCAACAGCANNNNNNNNNNNNNANNNNGNAANNCNNGTNNGNNNNNNNNGAAAAAATTGAATGAGTAACTGTCATTTGTTGTGTATCAAGTCAGGCATATAGAATCTTCTGCTCCTTTTCGCCTTTGACTTTTTTGGCAGGGCTCCGTGTAAAGGTAGTGTATATTGCTTGGCGTTTGATCCT…
Gma.4307.1.S1_at	BM269813	At5g42850	1e-44	Unclassified - Hypothetical Protein Supported by cDNA			CAGCTGGTGCCCTGATTGTGTGAGAGCAGAACCTGTGATATACAAGAAGCTGGAGGCTTCACCTGATGACATTGCACTATTGAGAGCTTATGTTGGAGATAGACCAACATGGAGGAATCCCCAGCATCCATGGAGGGTGGATCCTAGGTTCAAGCTCACTGGGGTGCCAACGTTGATCCGTTGGGAGAACAACACCGTCAAAGGTCGCTTGGAGGATCATGAAGCTCACCTTGAAAACAAAATCGAAGCTCTTGTTGCTGACAAGTGACAAATGATTGCCAGTGCAATGTCATAGTTGGTATACATATAGTTTAAATAATGTATGCTGTACTCTTATCAGCAATTTGTCCCTCTCATGCTTATAATTTTGCTGCTGAAACATAAAATAAATGATGAGTA…
Gma.5228.1.S1_at	CD394907	At5g43970	5e-26	Unclassified - Hypothetical Protein Supported by cDNA			TCGTCCCTCTGATCGTCGAGATGGACCGCGAGCAGCAGCTCAACGACCTCGAGCTCCAGCAGGCCAGCCTCCTCGGCACCCCCGCCCCCAAATGAAAATTTGAGGTTTTCTCTCAGATCAGATTTCTTGCTTTTAGGGTTTACGGTTGCAATAATTTTTTTTAACTGTTCTGGATTTTGATTAAAACCTTACTTTGAGGAGTTTTGTGTATTCCTACGATTTACCATATGTCATTAGTTGTTAAAACGCGGGTTGCTGAGTGTAATTTAC
Gma.4965.1.S1_at	BI970010	At5g47680	4e-61	Unclassified - Hypothetical Protein Supported by cDNA			GGAGCAAGGTATCCCAACGGCTAAACTCCCCATAGGAAATTTCATGAAGATGTCTAGTTCTCAGGTTCTCACTGTGAATCAAGTGGTAGAAATACTACTCAAGTATTTGGAGACAAGGGATTGGAGAACATCTTTCTTTGCTGTTATCCCTCAACGGAAAAGATGTCAATCCGATTCAGAAGGGAACGCAGAAGATACAGTAGAGGGAGAGGAAGAACGTGAACAAAATGATGATATAACTGCAAATAAAAAGATATGCGCTGAGGAGGTCCCTTCTAACTGTTAGAATTGTCTCTGGCTCAAAGTTTTCCTACAAACCTGTTGATCTTCTCCTGGCCATTGCATGGATGTGTACAACTGGAAGGCTAACACATCAAGACAGAAGTTTCAAATCAGAGC…
Gma.16711.2.S1_at	AW201538	At5g48335	6e-17	Unclassified - Hypothetical Protein Supported by cDNA			GGTGTAGTTGCAGTGCAGCTGCCCAGCTTCTTAATGATCGTTGGACAGCTGCAATACAATCCTACAATAATCCCAAAGATTCATCTGAAAAGCCAGTTATGTATTCGAGTGGGACTTCAGTATGGACTGCAGCTACAAGTGCTTCCTCTTCTGTATCTCAACGGGACTTCCTGGGAGAACTTCGTCGCCAAATGCACAGTGCAAATCCCAGTTTCACTACATGATGGCTGACTTGGATTGTTTAATAAAGATTTTGGATCATCGTGGATTTGTCGAATGCTTTAAGAACACTGCGATGCTCAGCTACCTGTTGTTTGTGCCTTT
Gma.12729.1.S1_at	CD395788	At5g48500	1e-30	Unclassified - Hypothetical Protein Supported by cDNA			TTACTACCAGAGACATCACGTGCCAGCATTTNGGAGCTGGGATTGGAATGATAATCTTCCTTTTACACAATGCTTTGAGTCTGCAAGACAGGCTGGTTTGCTAAGATATGGTTACTCTGAGTCTGAAGATAGAGATCTTTATGTCACTGGAGACTTGTATGAGAATGATTTTGTCAAACCCGCTGTGATCGTTGTTCCTCGCAGAAGGGAAAAGGTACGTTGCCAGAATGAAAAAGACGAAAAAAAGCAGAATTGGGTGAGTAATGTGAAGGAGCTACCTAGCCCAACTAGTCCAATTCAAAGACCAAAACCAAAGCCGGTGGATGAGGACTTGTACAAGATCTCACCAGAGCTTCTTTATGCCAAAAATAGGAAGAAGAGAGGGTTGTGTTTCTTTCC…
Gma.4499.1.A1_at	BI967549	At5g51170	8e-34	Unclassified - Hypothetical Protein Supported by cDNA			TAGTCAATGCAATTTACAGGCTTCATAATCTTCCTGAGTTTTACAAGGATCCACGTCCTCACATATCCTTAGCATGGGCCCTGGGTGACATCGCGCACTCTCTAAAGAAAATTGTCGACGAGGAAATGAAGTGTGCTGTTGGTAAATCTTTAAAGAAGTGTATTTTTAGCTGTANNTTCNNAAGTATTGAATGTAAGATTGGCAAGAAAGCATATACAATATGCAAANNTTNTGANGGNCNNNNATTNNNNNCNTTAAANNNNNNAGCAAGGNATNTCCTGAAATATTTCAGGTTGCATGGAATTCTGCTTTTCTAAAATGGTGGGTTTCTTGGTTCTTTATCCCTTGTGAGGTGTAGACTAGACCCATGCCTTATGCGAGTTCATCAAAGCTTTGTAG
GmaAffx.90956.1.S1_s_at	CF806681	At5g53905	0.003	Unclassified - Hypothetical Protein Supported by cDNA			TGTCCTTGAGTTCTAAGGAGACAGGAACCTACGTCTGGTGGATGAA
Gma.5816.1.S1_at	BI787790	At5g56640	3e-94	Unclassified - Hypothetical Protein Supported by cDNA			TTGCCAAGGCAAATGGCACCACTTTGCCATCTGCAGGATTGTTCATTATCAGATATCATTCTTTCTATCCATTACACAAGGAAGGTGCATATACTCACTTCATGAATGAAGAAGACGTTGAGAATTTGAAGTGGNNNNNNNNTNNNNACNAATATGATCTCTACAGCAAGAGCAAAGTTCTAGTTGATGTGGAGAAAGTTAAGCCATACTATGTGTCACTCATTGAGAAGTATTTCCCTGCCAAGGTTAGATGGTGAACCATTTGAATTCAAGCCAAGGTTTTGAGGAGATTGATAGATAATTATTNTGGCGAGCGAGCAATGTATCAAANAATTTTAGTTCTTTTTTTCTTTTATACAAGGATTCAGACTGCNCCTTATTATATTGAATTCACCCGCA…
GmaAffx.478.3.S1_s_at	BI941601	At4g00755	1e-22	Unclassified - Hypothetical Protein Supported by cDNA			TCAATGTGGATATTCTGCAGCCCTCTGGAATGTTTGTGTTGAAGAGGGACCAGCTGGCTAACCATCAATCTGTAGTGACGTCTGGAAATGAATCTCAAGAAATTTTGGCCGAGCAAAGAGAACTGAGAGATTNCCAGCATATTGTGACTATATTNNGTGGACAAGCATTAGGAATNGTNGAAGATGAGTGGGATGAGGAAGAATNNGATGNNNATGATTTTGATCCAGAATATGCCCTCTGATCTTTGCTNGTATAAAGTANNTTTNTAANNNCCNCTCCCAAATNAANANAAGGGAAAAAAAAATAGAATCTCCCCAGTTGAGGAATGATTGCATTCAAACCAGTTTTCCTGTTTTCTGTGTAATGGTTACCCTT
GmaAffx.89425.1.A1_s_at	CK606255		6e-19	Unclassified - Hypothetical Protein Supported by cDNA			AAGGGCGTAGTAAGCGACGAAATGCTTCGGGGAGTTGAAAATAAGCGTAGATCCGGGGATTCCCGATATAGGTCAACCTTTCGAACTGCTGCTGAATCCACGGGCAGGCAAGAGACAACCTGGTGAACTGAAACAT
Gma.5316.1.S1_at	CD404470	At3g15660	2e-55	Unclassified - Hypothetical Protein Supported by cDNA			GTATCAAATGATCCTGACACACATGATGACTTCAAGCCAGCTAATAAACTTGAGAATTCCAACATTTCTTTGGCTGATGTTATTGAGCAGGATGTCAAGGATAATCCTGTTATGATTTACATGAAAGGTGTGCCTGATTTTCCACAGTGTGGATTTAGTTCTCTTGCAGTTAGAGTGTTACAACAATATGATGTTCCTTTAAGTGCTAGAAACATTTTGGAGGATCCTGAACTGAANAATGCTGTAAAAGCTTTCAGTAACTGGCCAACATTTCCACAAGTTTTCATTAAGGGAGAGTTTATCGGTGGATCAGATATTGTTCTTAATATGCATCAGACGGGTGATTTGAAGGAAAAGCTTAAAGATATTACGTCCAAGCAGTAAAAGGACGAGTAATGT…
Gma.1907.1.S1_at	BG726144	At3g11210	2e-50	Unclassified - Hypothetical Protein Supported by cDNA			AATGGGAGCCATGCCTCCACTGGAAATCCATGCCTACTGAATTTGCAGAAGACTCACCATATGATCTTGTTGCTGCTGATGGGAAAACTACACTGAATCCTTCTGAGTGGACTTTTTACAGAGAGATTCAGTGGGATTAGGTTGTTAGGTTATCAACTTTAATCATAATCATTTGCTCTGGCCTCCATTCAGGAGCCAACCTTTCTGCCAGATCCTGCAGGATTTAGCAGTTTCATATATTATATACGTTCTGCTTAGACATGTTGAGTGGTTATTTGGTGATATCATTGCCCTATATTTTAGATAGTCTTTTTTTATTATTCATCAGGATTGTTATTTCNATAATTCAGCTGAAAGTTACCTNAANANAANANATCCATTCTTCCANANGCTATCTGC…
Gma.5748.1.S1_at	BU761120	At5g64813	6e-67	Unclassified - Hypothetical Protein Supported by cDNA			AAATACCTTCACCAGCATGGTCCATTCCTTCTGTTCAGAGACAAGCTCAGCGTATAGATGAAAATTTCACAGAAGATGATCAATCTTATNATACAAGTNNNNNNNNNGATCCTTACAAGTATAACATGCTTCCCCCACTTCCAGCACAACGAAATCTAACGCCGCCACCCACACTCTATCCTCAACAGCCAGTTTCGGTGTCGGAAAACTATAGTTTCCCTAGATTTTCCTTGTCAGGCTCCTCAGAAATCAGTACTGTGGCGAGAACAAAGCGATCAGATATTAATGTCTGAAGATCTGTGTATTTGATTATTAGTCATTGTTAATACATGGATGTATTCTTGCATGGAACAAAGATATATGCTTGTTTAAATTCTTTGTTCCTATTGTAACTTGTCA…
Gma.11304.1.S1_at	BE657349	At2g18910	4e-23	Unclassified - Hypothetical Protein Supported by cDNA			TGTTTTTGTATTGTAGTTTGGGTCAAGTTTTTGGGCTTCTCATGATGGCAGGGTT
Gma.17855.1.S1_s_at	BU546783	At1g20696	1e-05	Unclassified - Hypothetical Protein Supported by cDNA			TTCTAAATCCAACTGTTTAGTTAAGGGATGGTTATCTCTTGTAGAGCTTTTAGTTTGATTTA
Gma.2021.1.S1_at	CD397136	At3g11780	4e-25	Unclassified - Hypothetical Protein Supported by cDNA			AATCCATAGTTCTGAATTGCGGTCGCGGCTGCTATGATGCAGATTGCGGCATGANATTATTATATGATTGCACCGAATGCAAAA
Gma.10407.1.S1_at	CD396132	At5g13640	0	Unclassified - Hypothetical Protein Supported by cDNA			GAACTACGCGAATTGGTTATATTGGAAGAGCTTGCATTGAACATTTTTGTTATTAAAGTAAGGATTTTATTTGTCATCTCTAAGAAACCTGACCGGGGGCATTATTCTTAATAAGTTCAGCTGATTAGTTANNANANNNNNNANNNNNANAANNNAAAGCATGTGTAGGTAAGTGGTCCTTTCATTTTTTGTCATTATGG
Gma.7455.1.S1_a_at	BQ298956	At5g53310	2e-05	Unclassified - Hypothetical Protein Supported by cDNA			TAGGTTTGAGTATAATGCAGCATCTGACTTGGTTAAGGAAATTGAATTTGAGGAAGCTGAAGGGGGCGTCAAAACAAGAATTTTGAGGAAGTGAACTTCTTTTCTATTTTCGTGATAACATCTGTAAACTTGGTAGGAGACCCGTACAGGAAATGATTGTTAATCGATTGTGTAGGAAAGGTTCTTTTGGTACAGTGTTTCCTTTCCAAAGATTAATTACGCTATTATTCTTTTATCAGA
Gma.18063.1.S1_at	BU549422	At1g28960	2e-93	Unclassified - Hypothetical Protein Supported by cDNA			AACGGCAGCCAGCTTTTGTGGAGCANAACCCTAAATTCAAGCTTCCACAGGATGTATCCAAGGACACTACAATACCTTGAGTTCATTGTTTATTGTATTTTGTCCTTGATACTTGTCCTTAATCGTGCAAAAAAACTCGTAGCAGCCAGAGTTCTAGAATTCATAGCAAGTGTTTATATTTACTGAGAAAGGAAGAGGGTACTATCCCATCACTTGGAATTCATATTCCTACCTATTGAATGCCATCCCAAAGTTTAGAGAGTTGCAGACATTGAATCACTCAAAATAGAAGTATTTGCTGACAAGCAAGTAGTAACTTGAATACCGCTGAGTGTTAGAAGGGCTACTGGAATAAAGTAGTTCATTTTGTTACTTTTAGTTGAACAGAATTGTCTTCCT…
Gma.6508.1.S1_at	BI970890	At1g13300	3e-17	Unclassified - Hypothetical Protein Supported by cDNA			CAGCCAGTTGTGGTTCTTGGAGGTTTGTGGATGTCTCAAGATCAGTACAATGACTCTTCAAAAGTTAGCAGTTCAGGGTCAGGTTCTCCTCANAGTCCTCTTCATTTGGCTGCAGGGTCCCGGGGAGGNACATCNCCNACTGAAGGTGACAGCATNGAAGATGATGAAGATGCAAGATCCGAGAGTTNTAGTTGGAAAAGTCATATGNACAAANCAGGAAAAGTTGATGTATAGGATACTACTCTCCACCATGAATTTTGCAGATAAAAGTATACATGGGAGGAGTTTTACCACTACATAANAATANTACTACATGATACATAAAAAAGAGGGTCAACGATAAGAGGCNGTTGNAGTTTTTNTTNAAGGTTTAGCTTTGCCTTNTATACTGCGTGAGTT…
Gma.15155.1.S1_a_at	BF423817	At1g72450	3e-20	Unclassified - Hypothetical Protein Supported by cDNA			TATTATTATTTCATCAATTAGGTCCTCCTCTT
GmaAffx.63919.1.S1_at	CA782188	At1g72690	3e-15	Unclassified - Hypothetical Protein Supported by cDNA			CAAAGCCTAAAGACTCGCCTTCAGAAAAANANGTGAAAANTCCAAACATTTTTGAGCGAGCTAAGGAGGAGATTGAGGCAGTGNNTCATCNNGACAAATCGCCNCACCATCACAAAGAAACTCATGGGACAAGTGATGACATTGANGAGGGAACTTCACCTGATGAAATAAAAGCGCCTGGTGTGTTTGAACGGGTGAAGGAGGAGATTGAAGCTGTTGCTGAGGCCATTCATCCCAAGAAAGAATCTGAATCCGACACTCGTGATGTGTCACCAAAGTGATGGCTAGGATGTGCCTTTATTTTGTAACAAAGAGTGTGAAGACTTGTTTCAATGGTGTTAACCATCAAAACTACCTTGGCTTTGTCCACTGATCTTTCTTTCTTTTTTTTATTTTGTT…
Gma.7304.2.A1_at	BG156909	At1g29250	1e-18	Unclassified - Hypothetical Protein Supported by cDNA			CCCCTTTTGCATTGTCACAGCTATTGCCACAGTAGTAACTGTTGCTGAAATTTTGAAAAACAACGGACTTGCTGTTGAAAAGAAAATCACGACATCAACTGTTGACATAAAGGATGACTCTAGAGGTCGACCTGTTCAAAAGGCCAAGATTGAAATAGTACTCGGGAAGACAGAAAACTTCGATGAGTTGATGGCTGCTGCGGCTGCTGAAGATGGTGAAAATAGAGATGTTGAAGAGCAGAGTGCATGAAGTTCTTCAAAAATTTACTCCCGAATCTGTTGAAGATATGTACCGTTTAGTGATTTGCATTTTTGTTGTCGCGAGGTAGAGGACATGTCATTATAGACTGACCAGCAATATTGAACAACNAAAATTCCTTCGTTTCTTTTCTCNTAGAA…
Gma.524.1.S1_at	AW350155	At1g42960	1e-33	Unclassified - Hypothetical Protein Supported by cDNA			ACAGCTTCTCTCTGAATCTAAACCGTCTAGGGAGGATGGAAACATCTTTAACCAGAAGGCCTCTAACAATTCAAGCCACATATAGTGATGGTGGAAGGCCCAGCAGTGCTAGTGTATTTGTTGGTGGGTTTCTCTTGGGAGGATTAATAGTTGGCACTCTTGGTTGTGTGTATGCACCTCAGATCAGCAAGGCCATAGCTGGAGCTGACAGGAAGGAGTTAATGAGAAAATTGCCAAAGTTTATATATGATGAAGAAAAGGCTTTAGAGAAAACCCGAAAAGTACTGGCTGAGAAGATTGAGCAACTGAACGCTGCCATAGATGATGTTTCTGCTCAGCTAAGGTCAGAGGAGGCCTCAAATGGAGTAGCTGTGAACTCTGATGAAATTGAAGCTGCCA…
GmaAffx.88340.1.S1_at	CA800172	At1g67570	3e-15	Unclassified - Hypothetical Protein Supported by cDNA			TTGAGTTGCCTTCACATACCCAGTTAGCTTCTTATATGTCCTCGCATAACAAGAGACAAGCCTTTGTGATGTATCTGCAGACAAATGCTGGAGGAATCAGTATATTTGGATGGACAGTTGACCGGTCTCTTGTGAACACAATATTTTTCTTTGAATTGACTCTGGTTACCTTTG
Gma.11798.1.S1_s_at	BM525482	At1g68680	2e-26	Unclassified - Hypothetical Protein Supported by cDNA			TCTCCCTCTAATTCGTCTATCGCTGCGGCATAAACCCGTCTTGAGAGATCGCTTGTTTACTGCTGTGTTGGCTGGGGCCTTTGCTCATGGCTTCTATTTGGTAACAGATCTGTATGATATTGAGAGCAAGTGATTAAGCAGAGCAT
Gma.1837.1.S1_at	AW309339	At1g71900	7e-38	Unclassified - Hypothetical Protein Supported by cDNA			ACCATCTTTATCTGTTAGACTTCCTAAGCATTCAGAAGAGGATGGCTTTGATGGTGGTGAAGGCATTCCTCTTAGACGGCAAGAAGCCATGAGATCGCCATGATATATTCTTTGCATCACATCTTGCTTTTCTAAATGAGCTTGAGGCGCTGGGGAGGGATTTTGCCAAGGTCGTCTGTAATTTACTGATTATTTCCCTCCCCATCATATTTTTTACCTGATACAGNTGGNGTCGAAGGATGNGAGTTTCCTATCACTGTTCTTTTGGNCTCCNGATGATTATGCTTTCTGATCTTGCCTNGCATGCCCNTCTACACTCCATANCGGAGACAAANGCNAATGTAATTTTCTGCACATTGATTATATATAGTGTACCTCAGTTAAATGAAAATATTCATC…
GmaAffx.22627.1.S1_at	BG352722	At1g47420	4e-07	Unclassified - Hypothetical Protein Supported by cDNA			TGCAGATCTTATCATGCCTTCCCATTCATCAACCATGTCGTTCTTCGACCTTCTCTTATCTCTCGCTCTCCCAATCCTCTTCCTTCTCCTTCACACTCAGAATGCATGTCTCCTTTCTCGATGGGTTTAGGGAGCATGC
GmaAffx.22627.1.S1_x_at	BG352722	At1g47420	4e-07	Unclassified - Hypothetical Protein Supported by cDNA			ATTTCGCAGTGTGTGTGAGAAGAAGAGAAAAATGGAGAAAATGATGCGACTGAGACCACTGTTCCGATCACTGAGTTGCAGATCTTATCATGCCTTCCCATTCATCAACCATGTCGTTCTTCGACCTTCTCTTATCTCTCGCTCTCCCAATCCTCTTCCTTCTCCTTCACACTCAGAATGCATGTCTCCTTTCTCGATGGGTTTAGGGAGCATGC
Gma.17299.1.S1_at	CA802777	At1g47640	1e-112	Unclassified - Hypothetical Protein Supported by cDNA			GGGATTACATTCTTCAGGGCCTTGANGCTAATGCAAATTTGGTGTTGAGCATATCCCTNGCTGCACTTGGATCTTTGATGTGGCTTCGAAAAAATAAACCCAAGACCCTCATCCCTATTATATATTTGAGTGCAGGGATTGTAGCAACNATGCCATCTATCACAAGCTATCTGAGGCGTGGATTGGGGTGGCACTTTCCCAAAGTGGTNGGTTTTGAGCTCTTCACATCCCTGGTGATGGCTTTTATAAGCTGGCAACTGTTTNCTGNATGTCAGAGACCTTCAGTGTGAGAAANCTCATTACATANTGATCGAATCCTGCTTAACTATTTTCTGGCTAGAGTTTTGATCCAGGGTCATCTGTTTCTTTTTGCTGCTGCAATGCTGTTTCTTTAAATTT…
GmaAffx.3890.1.A1_at	BU545818	At1g50170	3e-45	Unclassified - Hypothetical Protein Supported by cDNA			GAGATGCTTTTCAATCTTGCGTTGAACAAGGTGCTCATCGCATTATTGTTAGTCCCTTTTTTCTCTCTCCTGGAAGGCATTGGACTCAGGATATTCCTTCCTTAAGTGCAGAGGCAGCAAAGGAACATCCAGATGTGTCATACATTGTAACTGCACCCCTTGGATTACATGAACTACTTGTGGATGTTGTGAATGATAGAATCAAACATTGCTTAAAGCATGTGGCTGGAGATGCAGATGAGTGTTCAGTTTGTTCTGGGACTGGTAAATGCAGGCTCTATTAATTTGTGAAACTAGATTGTTTTGGATGCTATTAAATGAGGCTGGAAGTCGAGGAATCTGTAAATTGGGTTGCAACTGTTCTGAAGTTGTTATTACGACGCACTTGAACTTTGCTTC…
GmaAffx.79779.2.S1_at	BE608960	At1g52720	7e-26	Unclassified - Hypothetical Protein Supported by cDNA			GCCAAGCCCGACCCGAGAAACAGGAAGCCCGTTTCCTCCAACTGGTGGGCTCCTCTGTTCGGATGGCCCGCGGATCCGGACTACATGGGCCCATTGCAGAAGGCGAGTGAGAAATCGGATCCGGAGCGGGAAGTGGGCCTGGACCTGGGCCGGCCCAGATCCAAGTTCACAGCGGGGTGCTTCACGGAGAAGAAGGCGAAAGAGCTGAGAAAGAAGACCGTGGAAACGTCGACGTTTCATGACATCATGTACCACTCCGCTATTGCATCCAGACTCGCGTCCGATGTTTCCAAAGGGTACGAGAAATAAATGTTTGGTTTTAATTAATGTTTTTTCTACCCTTAGACTCAGACTCACTCATCGTTGTATTTCGCTTTAATTTCTTTCAA
Gma.17802.1.S1_at	BE820990	At1g19020	4e-10	Unclassified - Hypothetical Protein Supported by cDNA			CATAGTCCTCAATTCAACTTTTCAGCTATATCTCTTGAAAGAAGAAGAAGAAGAAGAAGAAGAAGGAGAAATGGGATCCAACGGAACATCTTGGGCTGACCAGTGGGATAACGGGCCTGACCCAGTGACTGTCTCCAACGAATCGAAGAAAAAGAATAACGCCCTCGGCAAGACCAAGGCAGTGGCTTCCACTGGCGTCAAGAAGTTGAAGGAGGGTACCTCCGTTGGCTTCCAATGGATCAAGACCAAGTACCACAAAACTACCCAGAAACATTAAACTAACCTATCTTTGGTTCCTTCTTGTACATATTTATAATATCTATAGTCTCCCCTTTTGATTATTATGTGTGTTTTTTCAATTCATTTATTGTTCAGGTGTTATATAGGTTTACTT
Gma.15155.2.S1_a_at	BG789619	At1g19180	5e-18	Unclassified - Hypothetical Protein Supported by cDNA			TATTATTATTTCATCAATTAGGTCCTCCTCTT
Gma.17172.1.S1_at	BM178445	At1g16210	1e-31	Unclassified - Hypothetical Protein Supported by cDNA			TCGCGACAATTCGATTATTGAAGCTAGATCATTGGATGATGCCATCGCCCAGATGACCGTCGTCGATAACTTGCCCCCGGATCGCCATCCAGAGAGGCGCCTCAAGGCCTCATTCAAGGCATTTGAAGAAGCTGAGCTGCCCAAGTTGAAGGAAGAGAAACCGGGTCTTACTCACAATCAGTACAAGGACATGATATGGAAGTTGTGGAAGAAATCTCCTGACAATCCTCTAAATCAAGTTGCTGAGTGAATGGTCAACTGCAACTGAATGCAACAGCTTACCAAATGTTATCACGGCCTTCATTTCCTTTCTCTGTATGAGTTTCACTTTCTGTACATGCACATCGACTTTGAGTAGGACTCTTCTACTGCTCTGCTCTGCTCGGGATAAGGGCTTCT…
Gma.13166.1.S1_at	BQ296064	At2g28305	1e-30	Unclassified - Hypothetical Protein Supported by cDNA			GAAGGTTTCGTAACACCAGCTGCCCGTCACATTATTGTTTCTGCCCACACTGCCCAAGAACTCATGTGCAAACTTGAGGAATATGTCCCCGAGCACTGTGGCGTGGCCCCCAAGCTAAGTTGGGAGATGGAGCAACAGTTAGTTAACACTGCAAAGTCAGATATTTCCCGTTGACTAATAACTAAATAATTAATCTTCTACAAGCTCACTAATGCACCATCAAAGACCCTAGATTTAGTGTATAAGTATAAAGTATAATATAACCTCAACCCCATGATGTAGTTGTAAGCTCCACAGAATAGGGCGACCACAGTCGTTTTTAGTTTAGCTGTGGATCTAATCATTTGTAATTTCTATGGTTCAAGTTCAAGATATTCACCATGTAATTTCTTTAATTTT…
Gma.6511.1.S1_at	BQ627520	At2g17710	9e-20	Unclassified - Hypothetical Protein Supported by cDNA			TATCAAAGCTGCAGCTAGACTCCGTGCACGCACTCTCACGGAGCAAGAGTACGAGAGGTTCGAGTTGTCCCTGAAGACCGATAATGACAATGATGAAACCAAGAAAGAGATGGTGAGATGGATTGTAGGGAAAAATGTTTATTGCAAAACAGTTGCTAAGGACCAACAAGAAGTGCGCATCGGAATCAAGGATTGGTGGACAAAAAGTAAATACGCGTATTTGAATCAACCAGCCATAGATTCCATGGATCCTCCTAAGAAACGAACCTCTACTTATGTTCCCAGTTTTCTTTCTTACCAGCCCAAGCCTTTGTATCCTTCTGCTATTGGTGTACATCTTTTAAGCCACAGGAGGCATTCCATTGCTGCTTGTTAATTAATAATTATCTATCTTGAATT…
Gma.12967.1.S1_at	CD392833	At2g21290	4e-13	Unclassified - Hypothetical Protein Supported by cDNA			GATCGTACGGTAACGCTAGGCCGAAGAAAGAGAAGATGATAGAGCGCATCAAGGACAAGGTCGAAGTTCCCAGGTCCACTCCTTGGCCTCTCCCTTTCAAGCTCATCTGATTCCCTATTCTATTCTAGGCTTTCCGCTCACTCATATCACATATCTACTCTCTCGTTACCATTTTCTATTCAATTCGATTTTCACTTTTATGCTCTCTCTTTGGTTTTATCATCAAAACAAATAGTAGGATTTTGCAATTATAAAGTTCCCAT
Gma.3350.1.A1_s_at	BQ454119	At2g31090	3e-07	Unclassified - Hypothetical Protein Supported by cDNA			TGTAGCAATTCTTTTCTCTTGTATTGGCTCTTTTCTTTTCTTCTCTTTTATCTTTATTCGGATTTGCCTATTGTTGTGATTCATTGGTTTAATTACGATC
GmaAffx.44115.1.S1_at	BQ611191	At2g31410	4e-33	Unclassified - Hypothetical Protein Supported by cDNA			AGCTACGACGGCGTGATCGCCGGGAGGGTGTCGGGGCGGAAGTGGAAGCANGTGCGGCAGCNNAGGGCGTCGGCGGCGCAGGTNAGCCGGAAGGGGACGACGTTCGAGCAGAGGGAGAGGGAGAAGGTGATAAAGAAGGCGTACAAGGAGAGGATGATGGAGCTGAAGGAGGAGATTCGNTTGAACAAGGTCGAGAAGAGGAAGAAGAGAGAGGAGAGGGAGAAGAAGAAGCAGGAGAATATTATCAGATCTGGAACCAANTTCCANAAGATTNACNAACCCTAATACNTTGAAGAAGATCGCCAAATCCAAGCAGAGGAAGCAGCTTNNNGTTGTTCCTGATGANTTGNTTAGGAAATAGNNTNTTTTGTTNTTTTNTNTTTTTCAATTCGNTTTTTA…
Gma.4026.1.A1_at	CD396318	At2g34070	4e-54	Unclassified - Hypothetical Protein Supported by cDNA			GAGTACTCCAGTTTATCTACTTGATATAACACTCCTCTCACAATTAAGGAAGGATGCTCACCCTTCTGCTTATAGTGGGGACCATGCAGGCAATGACTGCAGCCANNNNTNNNNACNAGGATTACCGGACACTTGGAACCAGCTCCTATATGCAGCTCTCACCAAATGAAGGTGAAGGCCCCATACNAATTGATCCTTTTCTTCATCCCTTGGTTATATATTCAGCTAGTGTTTTTAGAATTTCTTTATTATTTGGGGGATATATAGATACTACAGAGGGGTGAAACTCAATTGTAAAATTATATATAGGATTCTTGGAAGAATAANTTACNAAACNAAATAAGTTCCTTAGAGATCNAAANNNNTGCATACNNAGATGAGTACTTTGTTTACAAGGGT…
GmaAffx.25785.1.A1_at	CD395209	At2g35470	2e-11	Unclassified - Hypothetical Protein Supported by cDNA			CGCACGTGCTCCTCGCTGCGTATTTCCTTAATATATTCTTGTTCCCGGTGTACATTGCGATTTGCCTATATTTATCGCTCAGAAAGA
GmaAffx.8063.1.S1_s_at	BE820317	At2g39705	1e-21	Unclassified - Hypothetical Protein Supported by cDNA			CATGGCTTCTTCTGTATCCACCACACCACCTTTGTACTTTGATGAGAAGTGGAAGCTGTCAAAGAAAGAAGGATCCACCAGAAGCAGGTCCTCAAGCACCCCTTTCATCAAGAATTCTTCCTCACAGAGAAGGTGTGCTTTTGCTAGCAAGTGTGCGANGCTTGTNAAGGAGCAAAGGGCGCGTTTCTACATCATGAGGCGGTGTGTGACAATGCTCATATGCTGGCGTGACTACAGTGATTCGTGAAGAGAAGAAGAAGAAGAAGAAGAAGAAGAAAAAGGGTNNGTNNGGGTGACGCANAAAAAGGGTAGACTAAAGTTCTCTCCTTTTNGNGTCCCCTNCTTCTTNTTNTTCTTTCGATTTNANATCAGATNCCTTTTGAGGGTTCCGCTTGAGAT…
GmaAffx.61026.1.S1_at	BG155002	At2g42780	1e-43	Unclassified - Hypothetical Protein Supported by cDNA			GCACTTGACCGAATCAGGCAACTGTACAAGAAAGAAGATGCAAGAAAACAGAGTAGGCAAGTAAGGACATGCACTAAAGTTCCACCTTCAAGTAAAAGAAGATTTTGGGGAGATAATGGACCTGGATACAATGTATNNNNTNTNNNNNNTNNNNTNNTNNNNNNNNNNANNNATAGAATTTCTGAAGAGTCATGAGGTAAAAAATCTTGCAGCAATGAAGAATAAATCTATCCAGAGGAATCCAAGTTCATCAAGCTTCAAGAAGACCGGAAGCATTTCTGGAATTGGTTCAACTTCCAAAGATCCCAAACCTACAAAGAGGGTATTTTAGGGGCAGACTGTGAAAGATAGCAATGCCATGTATCGTGATTTGCTTTTAAATTTTAAACATTTATCTCC…
Gma.3700.3.S1_at	BQ785427	At2g44870	5e-17	Unclassified - Hypothetical Protein Supported by cDNA			TTCGAGGAGAGGTGACGCTCGCCCATTTCGCTTTGCCTTCTTTGCAAAACCTCCTCCTCCTATTCCATTCTTTACTTACAACACTTAGTTCGCTTCTATGCTCTTTGTAAATTTTTCTTCAGAAATCATACCACCAAACTAATTATAAAACCAACACTTATATGCCTTTTCTGGAGCCGTATCATATCATCTCGTTGTCTATTGGACTTGCTTTATGCTCATAGAATAGAACCACTGTTACCTTATTCATA
GmaAffx.4125.1.S1_at	BU545078	At2g45060	5e-62	Unclassified - Hypothetical Protein Supported by cDNA			GCTTCTGGTACTTAAGAGGCCTCGTCGGGTCTTGTACTACAACACTTTGCGCCTTTTTGTTAGTGAAGAGTCCATGATTTCTAGAGCCCATGCTGAAGTGAAAGAATTGCGGCAATCAATTGAGCTTTTAAAGGCTGAAGGTGAAAAGTTGGAGAAGAGTGCATTACATGCAGAAGAGCAATTCTTACATGGAAGGACAAAACTCAGACATGCAGGAAAGCAGATCCGTAACGTGATTCAATCAGCATATAAAATNGAAATACGAGCAGGGGGTTTAAAAGATATCCTTGGAGAACTCCCTAAAAGAGAAACATCTCTCTTCCGATCTCAGGTTTCCAAACTTGCTTCTGAGGCAAANAAANAAAAAAANANCNNGNNNNNNGNNNTCTCTNNNATTAG…
Gma.3806.1.S1_at	BQ452617	At2g46890	1e-66	Unclassified - Hypothetical Protein Supported by cDNA			TGATTGGATTGTCTCTTCCGTTCTATGTCATCCACTCGGTGAACCAGCCTCTGAGCATGTGGGACTTGGTAGCCATAGTTGTGTGTGTATCTGGCATTGTCACGGCATACATTGCTGATACTCAGCTTTACAACTTTGTGAGTAGAAAGAACAAGGAGGTCCCTATTCTTGACAAAGGGTTGTGGTATTATTCTCGGCATCCAAATTACTTTGGAGAGNNNNNNNGGTGGTGGGGAATGGCTGTGTTTGCTTGGAACCTGGGACATGGATGGGCTTTCATAGGGGCATTAGCCAATACCATGTGTTTGGCTTATGTCACTAAGCTTGTGGAGGACCGAATGTTGAAACAAGATAGCAGAGCAGAGGCGTTTAGGCTCTATCAGAAGACTACTTCCCTAT…
Gma.13187.1.S1_at	BG839239	At3g02910	1e-55	Unclassified - Hypothetical Protein Supported by cDNA			ACTACGAGCGTCTCCCGATCAAGGTGGTTCCTGCGGCCGAGGAAGAGGACGACGACGGGTTTGATGGGGAGGNGGAGGCGGCGGCGGGGCTAACGTGCGCCGAGGCGTATTATGCGCATGGGAACTACGCGATGGAGCTGTGGAAGAAAAACGGGAAGCGTGGGTTGAGGTGTTATTCGCAGAAAGAGACAATTGGTTATGTGAAGCGCAAGGATAGGCCTCAGCATTTGACCTTCCTGGATCACATTCGCTTCTTCCTTTCCTCTAATTAGCCTTTCTCGTTNATTAGGTTACTCCAATCCATTCCTGCTTCCTGCCCTTTTTTTCTTCTTAGCTTATGTTATGCACTACTTTGTATTTTGCCAAGACCANTTCATGATCACCAGGATCTCTGTCTCT…
Gma.9659.1.S1_at	AW349623	At3g07910	6e-20	Unclassified - Hypothetical Protein Supported by cDNA			AAGGTGCCTGGACTATTGAAAATTAGGCATATTGGACAAACTACACTTGGAAGTGCTGCTATTTTTGGTCTTTTCTTGGGTGCTGGAAGCTTGATACATTGTGGGAAATCATACTGAGGATAAANATNNTNNCCNCCCCCCNNNNNNNTACTTACAGTGNTTTGGTTNGCTNCNCTTGTAAAGTATGAGTAGAGCAGGGATTTNCTGNTTTTTNNGTTTTCTGGATCATGGAAAANGTTTNATGGCACTACTNCTATGAAATTTNNCATTTNTTTCTCCCAANANANTANNACTGTTGAAATTTCTTTGCTGGGGCTTTCCT
Gma.3893.2.S1_at	AW310433	At3g08030	1e-134	Unclassified - Hypothetical Protein Supported by cDNA			CCCTCTCCCTGGTTGGATTATTGAGTCCCTCAAGGCTGTGAAGTTCATTGATTCAAAGCATTTCAATGTCCCATTTGGGCTGGGAGCAGTGGAGCTTGTGGCAGGNAGGGAAAGTGCCATTGCCCAAATCATCAGAACAGTTACCAACAAAGTCTACAACATCACATTNTCAGTTGGAGATGCCAAAAATGGGTGNCATGGATCAATGATGGTTGAAGCATTTGCCGCNAAAGATACCTTCAAAGNTCCCTTCAAATCTGAAGGGAAGGGAACATNCAAGACTGTAAGCTTCAAGTTCAAAGCAATTGCACCAAGAACNAGACTCACTTTCTACAGNTCCTTCTACCATACCAGAATTGATGACTATGGTTCTCTTTGTGGCCCTGTTNTTGATCAAGT…
GmaAffx.72744.1.S1_at	BU550658	At5g14600	9e-94	Unclassified - Hypothetical Protein Supported by cDNA			TTTGAGGTACTCTTACGCACGTATGAAGTTCGGGAAGAGAAAATGCAAAGCTTATGTGGGGATAGCAATGGTTCTGTTCCTAGCAAGAGGAAACAATGCTCTGGTGGAAGCTATGTACTAGGCAGCAGTCCATCTACTTCTTCTGTCATGGCTAGACCTTGTGGTGAAGCTCGAGGACACACGGGCTATTTGACATTTGCAAGAGTTAAATCACTCTCATGAAGAGTGCTATCATATCCATCACATTCGTGAATCTCCTTTCGATTTGAGCCTCATGCNGTAGGTTGTTGTCGTTTGTTACAATACAGCATGCCTATGATCCATACCTTGCTACAAGAAGCAAGGCCTGCCTCTTTTTTGCAGATTAGTAATCATTGATAAATATTTTGTGGTGCTTCA…
GmaAffx.68762.1.A1_s_at	BE822821	At4g32930	5e-11	Unclassified - Hypothetical Protein Supported by cDNA			TGATATCCAATCTTCGAGCTACTTTTGAAGTGACGAAGTAGAGAGAACTGGTTTACTATCTGAATATTTTCTTGATGTATAAAATTGACTGTTTTCTTCCTAGATGAGCTTTTGAGCTCTGGGTTGCATCATAATTAGGCATGAAATTTGTGGGATCTTCTAACATTACATGTTA
Gma.3052.1.S1_at	AW102558	At4g34412	8e-47	Unclassified - Hypothetical Protein Supported by cDNA			AAGTCTCGAGACTCTTTGACCACACGCACTCTTCATTCAGAGCTTGTTTACAACTACTCAGGGTCTAAGCATATTACTGAATCTTTGAAAAGATGCGGCATCTCTGACAGCACAACTTGTATCCTTGCTGCTCGATTTGATGCTAGTCCTGATGAGATAAAAGCTATAGGGAAGCTCATTAACGGCAAAGAGATTGACCTGGAGGAGCTAGAAGGGAGAGCAAACCAATCCCAGATACAAAAGATTTACAAGATATCTTCCTCGGAACTTGGAGTATCATCACTTGCTGATGCAATAACTTGTCGTATAGCTGCTCGTGATGCCCTGTGAGAAGAATGAACGTGATCTGCTTGAGTTTTCTTATCTCCTTGATCTATTGCAGAAAATGTCATGAAATTT…
Gma.3769.1.S1_at	AW350551	At5g08565	6e-54	Unclassified - Hypothetical Protein Supported by cDNA			GGAACCAATCTAGCCATCAGTTGAAACAGTGAGCTTACAAAAAATGGCAACTGCACCTGCACAAATTCCTACAAGCTTTGGCCATGAGTTGAGGGCTTGTCTTCGTTGNCGCCTTGTCAAAACCTATGATCAGNNNNNAGAGTCAGGCTGTGAGAACTGCTCATTCTTTAAGATGGAAGAAGATCACGAGCGTGTTGTTGATTGCACTACTCCCAATTTTAATGGGATCATTTCAGTTATGGATCCAAATCGGAGTTGGGCTGCCCGTTGGTTGCGCATTGGAAAGTTTGTTCCTGGTGTTTATACTCTTGCTGTCTCAGAGGCTCTTCCTGAAGAGATGCAGGCTATATGTGAAGACGAGCGTGTGCAGTATATCCCTCCCAAACGTTTGTGAATGAC…
Gma.6687.1.S1_at	BE820609	At5g10710	6e-29	Unclassified - Hypothetical Protein Supported by cDNA			GCAGATCTCATTTCGGTGCTTCCAACTCGAATTTCAGTGCTAGCCTGGCCTATGTTCAATAAAAATACTATGGCTACTTTGAGCAGGAAGGAAGATGGACTCTCAGGAAGTCATTCTTCTCCAATTCGCTTAACCTATGCAGAAGATGCCTTACGAACCATGAGTTTACCTGAAGCATATGCAGAGATTGTATTAAACTTACCACAGGCGCTTCAGCAGACGTATCATCAAAAAGCCCCTGCTTAGAGCTTCGCCCTTTGAGTAGCCTAGATGCATCAGTAAAAATTCTTGGTAGAGATGTTAAATATTAGATAAACAACTTCAGAATTATTACCTATTCACCTAGCCAAATTGCTCATAGGTTGAGTTCATTTTGCTGTAATATTGTCATATAGCATT…
GmaAffx.90005.1.S1_at	CF805730	At4g29735	8e-17	Unclassified - Hypothetical Protein Supported by cDNA			GATATCCGACTCTAAGGTATGTTCTTAATCTATCGATAACAATGTTGGTTGTGTGTAATGCTCAAGAAGATTATGATATCTGAGATAGTTTTCAAGCATGTTTTTCGGTAATTTCTATATGCTGAATGCAGATGAATATCATGTTTGATACTCTT
Gma.16363.1.S1_at	CD408212	At5g18310	7e-12	Unclassified - Hypothetical Protein Supported by cDNA			AGGAAGCCAGTGACAGTGAGCAAAGAGATGATGCGTCTACACGACGCCGTTCCGCGATCTCCGCTGCCTCGTGGTGTTAGACTTCCCAAACCTGTTGATGAAGATCTCTATAAGANTCCCNNACCAGANGCTACTTNNNNNNACNAAGCGGGTTCGTCACCGCCTAACATAATAACACTTTCCATTTGTTTCTTTTTTCATCTTTCACTTTGTTTCATGTGCAGAAGAAAATGCTGGGTTTCATTTCCAAGTGTCTGGTTCCTGCTGCTTGCGTTTCATGATCTCCATTAAGGACTGCGCATGTGCTTTTCTGAGTA
GmaAffx.69591.1.S1_at	BM271258	At5g21070	0.0009	Unclassified - Hypothetical Protein Supported by cDNA			GAGGTCTGTGTTTAGTAGGAGTCTTGACCCTACTTTTTCATGATCATGATCATGAAGTAGTTTCGATTGGACATCACTCACATTCACATAGGAAGATTATTTCCTTNTGAGATATATAAATGTTTTTGNAATTACATGCTTATGAGCATTGTCNCGGTATTGTTTTTATTTTGTATCNGAAGGGAAAAAGAAAAAAGAAAAACAGATGTTGCTGCTTAGGAGAACTGATCATCTTGGTCTAGTAAAAGTCGTTGTATACTGAGTTTTCAATGTGAAA
GmaAffx.6537.1.S1_x_at	BQ081300	At5g23040	3e-09	Unclassified - Hypothetical Protein Supported by cDNA			TGTTCGTTGCTTGTACTTTTCTTAAGTGAAGTGGAAACTATTCTTTCAACGTTATAGTCGGTGATGAGTTTATAGGTGATCAAACAATTTTTTTGTTTTTGTTNTTGTAGCGAGCCAAATTGTTTAGTGTCGTCTTTTTTTATGAAAACAATTGTCTGAGTTGCCANATATTCNAGCNAGNATATATTATTACCGAGCCTTAANNNNNNNNNNAAANNNNNNNNNNNNANNNNNNAANAANNNNNTCCACCGTGGTTTGTGACTTCAATCTTA
Gma.4078.1.S1_at	BI321602	At5g24105	7e-07	Unclassified - Hypothetical Protein Supported by cDNA			GAAAGAGAATCGATCGACGCTGCTAGAGAAGTAGAAGAAGATGGCGGGTGGTGCTCCCAAACAATTGTTCGGATTCGGAGTTGTGGCGTTGCTTGCCACTCTCATTCTTCCTCTCTTTATGCCCGCCGCTGTTCAGGCTCAATCCGCAGCCCCTGCACCTGCCCCTACTAGCGACGGGTCCTCCCTTGATCAAGGGATAGCTTATGTGTTGATGTTGCTGGCTCTGGTACTCACATACATCATCCACTCGGCCTAAATTTCCTCCACCTTCTGAACTTATAGAGCAGAAAAGGGTTATGGGTGTTTGAAGGGGGTGTTGTGTTTGTTATGATTAACAAGTTTCGTACATTGTGTAGCAAGCAGTGGGAAATGTAATATTGCTAATACTTATGTTAGAAG…
GmaAffx.9844.1.S1_at	BM522926	At5g24105	6e-13	Unclassified - Hypothetical Protein Supported by cDNA			CTTACTTACATCATCCATTAACCCATTCATCTATTCACTATGTTTTTCTTCTCTGTTGTATTTATTTCTTCAACTCTATTCTTTCAATGAAATTCTTTTTTATTATGTGTATGTATGTCTGAGTTTTCGTCCATCTCTATCTGTTTATTTCCGCAAATTAGTTATTTTCAT
Gma.734.1.A1_at	BE658896	At5g26600	5e-12	Unclassified - Hypothetical Protein Supported by cDNA			ATGGCTCTGTTACTGCGTATGCACGAATTTCTCGTCAGGTTTACAACAAGGTTGAGGACTATTATAAGTTCAGGAATGCGGTTAATCAACTTGTGCAAGATGGGTTTACTTGTGCTCTNNNTTCGGCNNGANATTGGGGTAGCCTATGCTCTGCTCTTAGTTTTAATTAACTCCTCAATAACATATTCGTCCATTTTATATGTGGGATACTATTTGCAAATGTTGAGTTTGCACTTTGCTGATTGCGCTATTTTGCCCGGTCTGTTGAAAATTTCATTGTCTATATATCCAAGTATTTGAGTGGACATTNGTTGTTTAACATTTTCACTACTCGTTTCTGCAATATTGCACCATCAGTACTGTAGTGGTCTGGTGGTTGCTTC
GmaAffx.86242.1.S1_s_at	AW100091	At3g48180	1e-05	Unclassified - Hypothetical Protein Supported by cDNA			GAGCAAGGCACCAAGTTGGTCTGACCAATGGGGAAGTGGAGGGTTTGCCAGTGACCACTATGAGAAGGAGGAAGAGGAGAAGACGAAGATGAAGAAGAGTGGGAGCAGCAAGAAGATGGCAGATGCAAAGGCTGTGGCATCAGCTGGNATGGANAAGGCCAAAACTGCAGCAGTTGTGGGTGCCCAGAAGGTGAAGAGTGGAACCTCTGCTGGCCTCAAATGGGTCAAGAATCAGT
Gma.15582.1.S1_at	CD403765	At3g14870	5e-06	Unclassified - Hypothetical Protein Supported by cDNA			GATACAGTGCCAAGTTTACCTCTCACAGCACCAAGTAAAAAATTTCACATCTACAAAGCAAAGGAGGTAGTAAAAAAAAAAGTAAAGCTAGTAAGTAGTGTTTTTTGATCAGAGACTGACCCCCGCATGCAATAGGTTGTTATATTGTGTTGAAGTGGAAGCCAATGTTTTGAGTTGAAACTTTTGGGGAGGGACATGGCTTGTGGGGACTCACACTGCCATGGTTCAATGGGGCATTGTTTTTTCTTGTCCATTTGTATTTTGGCCATTTTGAAAAGGAAGCGCGTGAACCGTTGCATTGGGAAATGCCCCTTTTGTTCAGAATGTTTTTTTTTCTTTAAATTTATTTTGTTATGTAGTTTAATCAAATGCTTGCCCCCATATTTTGTTGATATTAGG…
Gma.10858.1.S1_at	BI970945	At3g17860	4e-30	Unclassified - Hypothetical Protein Supported by cDNA			GTCAGTGCAACCACTATGTTGACATCAGCTGTACCTCAGGCCCGGAAAGCATCCTTGGCTCGATTTTTAGAAAAACGCAAAGAAAGGGTGATGAGTGCAGCACCATACAACCTCNACAAGAANGTCTGAAGAGTGTGCCACTGCAGAATACGCTGGTGNTAACTTTTCTGCCACTAACACTGTTTTGGCCAAGCAAGGATAGTAGCCNGCNNNNACCTTTAGGAAACAAANTATTTCGGAGAAAAATATTGTTGTAACCTTAAAAATGTTGTAAGCAGATGCTTTTATTTTCGTTGATCACAACTTATGCTGACATTCTCNGGTTCAGCACATAGATAGGCCATTACCATAATTATTTTTGTGGTGTAGGGCTTTTACCTTGTTAT
GmaAffx.2719.1.S1_at	BM086640	At3g19540	1e-70	Unclassified - Hypothetical Protein Supported by cDNA			TTTTCCCACTTGCTTTCCATAAATGTGAAATTGGGAACTTGCTGATCATTTTATAAGCTATAATTCCTGTAGAGTTTTTTTTTTTTTCCTGTGAAAGCATTAACGATAATGCTCGGAGATCACAGTTATAACCTTGATTTTGTCACTGAAAAGTTTTGGCNNNNNGTTTCAAGGANCANNANTTTGTCAGATTTAATATTGATGTTATCNTTGGTATCCNTNAGGAAAATTCTTCCATCTTTGAAGGAAACTANATAGGATTGAAGAACTCTAGATGNNTNTTTAGTGCTGGTTTTTNNNNATTATGAATTGTAAACCAAGTAGCCAGAGTATGTAGAAGCTAAATTATTCCTAGGATTTTTATGCTTTTAAGGACATATATATATNGACAATTATCAC…
GmaAffx.87106.1.S1_at	BM093182	At3g24255	6e-09	Unclassified - Hypothetical Protein Supported by cDNA			AAAAGACAAAACCTGCCAAGCATATACAGAGAAACTGTATAGAAGCATACCGTGAATGACAGAGTTGACAAGCTGAATTCTCCCCATTATGGACAAAATGGAGCCCTTCCAAGAGGCCAACTTACACTTAATTTTATCAGCAACGCAATAGAGGTGCCTTCTCGTTGGCTTCCCTTTGAAGATAGGGACTCCAAAATAGTTGAAAGGGATATCACTATGGAAGTACTGAAGCAAATCAGAGATAACACGCAGCCTTTGACCAGGAATAGATCCAATAAAGATTTTAGACTTGTGCTTGCTAATCACTTGACCAAA
Gma.14486.1.S1_at	BI320417	At4g17960	2e-29	Unclassified - Hypothetical Protein Supported by cDNA			TTGGCTATTGATTCGTTGGGCTTTATCTGTTTAGTTGTGCATACAGTGGAACCTGCAGTTATATTTTAACTGAGCTTTACTTGACGGTTCCTTTTTGCTCTTTGGCTTTGTCTTTCCTTGGCTATGAATATGTTTGGGAATTGCTACATTTGATGAAAGTGTGTGGGAGTTAAACTACCCAACAAGTTAAGCTATATTAGAGGCTGTCAGGTTTTTAGGTCTAGCTGTTGAAGTTTTTTGCTACAGGCGTTGAATAATGTAGATGGGTATCTGGGTAAGAGGCCTACATGTGAGATCTACAA
Gma.14457.1.S1_s_at	CD392605	At4g20150	4e-31	Unclassified - Hypothetical Protein Supported by cDNA			ATGATTAATGCCTGTCTTCAAGGATTGTAGCATTTGGTGAAAATAATCATGAAATATGTTGAACTTGTTGCCTTTGTTTTCTGATTTCATAGTGCTATGTTTGTAAGGCTGTTAATCAGACTATTTTGTGCACATGCTTTTGAAAGC
Gma.16912.1.S1_at	CD408963	At4g02370	4e-31	Unclassified - Hypothetical Protein Supported by cDNA			AGCGTGCAGCTTCGACATAGAGTCCTACACGCTCAAGTACAAATCCACCATCACGGGTGTTATCTCCAAGGGCAGGCTCTATAATCTCAAAGGTGTCACCGTCAAAATCTTGCTCCTTTGGCTCAACATCGTCGAGGTCTCTCGTCAGGGGAACGATATTTACTTCTCTGTCGGAATCGCTTCCGCTGATTTTGGCGTCGAGAATTTCCTCGAGAGCCCCCAGTGTGGTTGTGGTTTCGATTGCAAAACACTACCCTTAAACGGTGACGTTTCCGTTTCCTCAATTTAATTACACTTTTTTTTTGTGATTCAATTGCCCAACGGATT
GmaAffx.26782.2.S1_at	AW598515	At4g12340	1e-24	Unclassified - Hypothetical Protein Supported by cDNA			AGAGTATAAGCTTCCTAACCCAAAGCCTGAGCCTTGCATGGCCGAGAGACTTGCGACCTTATCATGTTACAAGGAACATATCAAGGACCCCTTGAAGTGTGCCAGTCTTGTTACCGGTTTTGCTGATTGCCTGCGTAGGTTTGGCCGTTTAGGTGACAAGTAAGTTATACTGAGAAGTGGTTTAAAAGGAAATTCGTGTGTGCCNAATGCAAATAATTACTAGTGAACTACATACTGACAAATACTCATTTGTTACGGCCAATTTTGTGTAATCTCATTCCCAACATTAAACTACAAGCTCAGAATAAGTGACCTATTCGTCGTTTGGAATCTGAACATTTTCTGTTATTTTCGTGCCCTACCGTTCTGTCAAGTTGGCCAGTTTTATATANNCACACA…
GmaAffx.34453.1.S1_at	BU544114	At1g05710	1e-37	Unclassified - Hypothetical Protein Supported by cDNA			GTTAAGCTGCTTAGTGCTCCATACCTTGAAAGTTCACCAGCAGCCAAGATGCAGGGTGTGGAGCCATGCAGCCTGAGGAGTAGAGGCTTATGTCTTGTTCCTGTGTCAGTTACTATTGGAGTTGCTGAGANCAATGGTGCANATATCTGGGCNCCCATTAAGACTACTACTTCTCCTAAATTTGAGAAGGATGTCTCCCAATTTCATTGANNAATTTTCTCANCTTTNCAGCCTAAAGGTTGCTAAAGTTGCT
GmaAffx.77292.1.S1_at	CA934970	At1g14060	1e-18	Unclassified - Hypothetical Protein Supported by cDNA			TCATAGGGTGGGAAAATTGCGTCCAGGAGGCCGAAAACAACAACGAGGACCTCCTCGAGAAGTGCGCCCAGGTCACCGNCGNCTCTCAAGCGCTGNATGGACGCCCACTCCGACTACTACGAGCCCATCCTCCGCGCCGAGAAGCTCGCCGAGGAACAGGCCATCGTCGANNNGNNNNAGGAGAAGCAGAATCAACAACAACCTCCGCAAGACCAAAAGGCCGAGAAGGTTGTTGAGGAAGTAGCCATCATTGAATTGGAGGTGGAAAAGCAAAATTTGCCACCAAACGAGTCCCAACCCCCTTCTCCTTCCAGTCAAGACCAAAAGTGAGACCCCATTTCATTGCCCTTTTTTGCTTCTCTTAACCCACTGTCATACTCATACCTGTACTGTCAATGC…
Gma.1732.1.S1_at	BM891256	At1g14685	2e-39	Unclassified - Hypothetical Protein Supported by cDNA			GCTTGTTGCACCACAAATGTGTCAATATATCCTTTGCCAATGAGCATGAAAAGGCGTGGTGCAAGGATAGCTGGGCGGAAAATGAGCCAAGGTGCTTTTAAAAAGGTTTTAGAGAAACTTGCAGCTGAAGGTTATAACTTTGCTAACCCTATTGATCTGAAGACTCATTGGGCCAGACATGGCACCAACAAGTTTGTCACTATCAGGTAGATAGGTGCTCTGCTGAGACACATGACATTTGGTCTGTTTCACCTGTATATACACCTGTGTGATCTTTCACACAGATGTTGAGTTATTTGTTATCCAAGATTTTTCTGTCGTGGTACTTCTACCTAAAATTTGGATATTCCGGTTCTTTTGTTCTTTTTCCCTCTTCGGCTTTTATGTGATAAGGGACAA…
GmaAffx.87659.1.S1_at	BI971504	At1g05960	7e-28	Unclassified - Hypothetical Protein Supported by cDNA			GCACCAGCAGGAGACTAGGGCACTAGTTCTTTCAAGTGAAAATGAAACGAAAGTTTCCCCTCTGCCAATTAAGACACTGGATTATTCAGAAGGTGATCTGAAGTTAGTGAGTCAGCAGCCAATTCAAGCACAATATCAAGTTCGCCTATGTTCATATGACTTTGGACAGCAACATTCTTTGAAACTACCACCTGCAAGCCCCTTTGATAAATTCTTGAAAGCTGCTGGATGTTAATGGTACAAGATTGGCATAATAGATGTGTATGTAACTATTTATTTATATAGAGATGAACACTCTCTTTGTTTTTGTTTTGGTTAGCTGTTGTCTCTTTACCAATCAGTTGGTCTTATTTTCATTCTTTTTGTAGTGGTAAACTGGTTGTTTCTTTAGCTTCCTTC…
Gma.2337.1.S1_x_at	CD391634	At3g13200	5e-53	Unclassified - Hypothetical Protein Supported by cDNA			AAAGCTACGCAAGGAACGACAACAACANGAGGAGGAGCTNAAAGTAAAGGAGGCAGAGCTTCTGCGNGGAAACCCACTGCTAAATAATCCAACAGCATCTTTCAATGTGAAAAGAAGGTGGGATGATGATGTGGTGTTTAAGAACCANNCCCGTGGTGAAACCAAAACAGCTAAGCGATTCATNAATGACACCATCAGGAATGATTTCCATAGAAAATTNCTGCANAAATACATGAAGTAAGTCCTTGTGCCAGAAGTCNGAGTTGTTTGGANTTTGGNCTCAACAGAACTTATTAATTTGCAGTTTGTATCTAAATGTATGATTCAATGTTGATGGATATATTNGTTTCNTCTTATAACNNTNTTTTAACATGNTANTCNTAGTTGCTGTAACATGGT…
Gma.3514.1.S1_at	CD395811	At3g09735	2e-06	Unclassified - Hypothetical Protein Supported by cDNA			CAAACTTTTGCATCCGAATCCCCGTTTGTTTTGGCAGAAGCCATGGCCGATGACTTCGACTTCGCAGATAAAGTTCCTCCTTCGTTCGATCGCGTGGGAAATGTGATCAAGGATTCTGGATCCAAAGCGTTCAATCCGGGTTTAATTGTCCTCCTGGTTGTTGGTGGGTTGCTTTTGACATTCCTCATTGGAAATTATGTGCTCTACACATATGCACAGAAGACCCTCCCTCCTAGAAAAAAGAAGCCCGTTTCAAAGAAGAAGATGAAAAAGGAGAGACTAAAGCAAGGTGTCTCTGCACCTGGAGAGTAGAGTTTGTACTCAGTTTTTGTTCTATGGTTTAAATTGTACTATTTAGATGAACTTTCTCGTTCTGTGGTGTTTTGCATTACGTTGATT…
Gma.3256.2.S1_at	BQ298351	At1g23750	1e-46	Unclassified - Hypothetical Protein Supported by cDNA			GAAATCTAGCCTTTTTATTTGTCTATGGGACATCTCATCATGCTCATCACAGTTCACCTGAGTTTAGGAATAGAGATTTGAGAAGCCAGTAGTACCAACAGTTGCTTCTTACTGTTGCAACAGACTCTGTGGATCTTGTAGCTTATCCACTGAACAGATGGTGGATTTAAGTGCAAATGGGAATTGGCTTCCAGATCATGCGTTTTGTTATGCTATCTATTGACATTTTAGATTATGTGCACCTTCATC
Gma.2762.1.S1_at	BG508886	At4g28440	3e-37	Unclassified - Hypothetical Protein Supported by cDNA			ACGGTGACCACTCGCGGCGGTCGATCGTCGGTGCTCGCGGCGCGCCCGTCGCGCATCGCCGAGTGCCTCGTCGGAGACGAAACCGGAACCATAATCTTCACAGCACGCAACGAACAGGTGGACCATATGAATGCTGGCGCAACTGTAATTCTGCGTAATGCAAAGATTGACATGTTCAAGGGATCTATGAGGCTTGCAGTTGATAAATGGGGGCGTATTGAGCCTACAGACCCTGCAAAATTTGAAGTTAAAGAGGATAACAATCTTTCGTTAGTTGAATATGAATTAGTGAATGTTGTTGAAGAGTGATTTTATCTTCTGAGAGTGAATCTTTGGGGTTTACCAGAGGTTTTAATTTTTATTGACCATTAAACAATAGACTGCGGTGCAGTTTTCTTA…
Gma.13834.1.S1_at	CD407387	At1g71440	2e-76	Unclassified - Hypothetical Protein Supported by cDNA			AAGCATTTTGTTGGGCTTCAGTTGAAGGTCTTATCAGGGGTTTTGATGCACCATGTTCATTGGATGATCAGTTCCATTCCTTGCCGCAACTGTTTTCTGTAAATCACTAGTTATTTTGATTCAATTGCAAACAGATTTGGGTCTTGTCCTCTGACAGATTCGAATCGTCTTTGGAAA
GmaAffx.69047.1.S1_s_at	BG237330	At3g62770	1e-68	Unclassified - Hypothetical Protein Supported by cDNA			TGGTCAGTTGCTCAGTTTCACTTACAAGAGGGCTCTCATTACACAGTTGCATTTGGTCTCCAAAAGAATACAGTCATTATTCTTGGNATGGATGGAAGCTTCTATAGATGCCAATTTGATCCAGTACNTGGAGGGGAGATGACTCAGCTGGAANATCNNAACTTTTTAAAGCCAGAACCAGAAACAGCCTTGTNAGACGCGNNGAGAAGAAATCCTNAGCGCTTGNNNTTNTCNGCTTAGTTAGGNTTATGNANATATGNATACTGAAGTAACACTGACCTCATTTTATTATTATTACTAACTCAGGGTCGACCTCGTTGCTT
Gma.2224.1.S1_s_at	CD406086	At5g23860	1e-173	Unclassified - Hypothetical Protein Supported by cDNA			GCAATTCACTGCAATGTACAGGCGCAAGGCCTTCTTGCACTGGTACACTGGTGAAGGAATGGACGAAATGGAGTTCACTGAGGCAGAGAGCAACATGAACGATTTGGTGGCAGAGTACCAGCAATATCAGGATGCTACTGCTGATGAGGATGAGTACGATGAGGAGGAGGTTGAGGAGGGGGAACAAGCTTACTAGGACCAGTAAATGGTTCATCACTACCTTGTTTTAATTACTAAATTTCCTGCTAGTAGTCATGTATCTATATATGTCTGTCTCTACTTTTTTCCATTCTACCTATTTCTCCTATATTTTTGGTGATGTTCGTATCCCTTTTTTAAGTTTTAAGCGTATTAATTAATTACCTTTGAATTGTTTGATATGTTCCTCGTAGACCAGAT…
Gma.2198.1.S1_at	CA802683	At1g14360	1e-159	Unclassified - Hypothetical Protein Supported by cDNA			GTAAGCATTGTGGTATCTTCTCTATTGAGTGGAAATCCCCTCTCNACAAAGCAATGGGGGTGTGTTTNCATGGTGTTCTCAGGATTGTCTTANCAGATCTACCTCAAGTGGCAGAAGTTGCAGAGATTGCAGAAGAAAAGAAAAGCNNTGTGAAGCCCNTCAGCAATTTTGAAGTCAAAACGNTAATACTATCNTNAGNTAATTTGCCCTTACNNNNNNNNNNAAGGTTCAATGAACCAGATTTAGGNTTNTGCAAAAGAATATTTGTAATTTTAATTGAANAGATACTTTTTNNNAAGAACANAGCTGANAAGTTTAGANCCCATTNTCTCATTCATTGTGCCAATATTTAGTTGCCTGTATTCTACTGAAGAGCTAGATTTAGTTTTATAGCATAAN…
Gma.7925.1.S1_at	CD402219	At1g32370	3e-26	Unclassified - Hypothetical Protein Supported by cDNA			ATAACAATACCATCCTCTGATAAAGTGCATGGTTATTCAACTGAGAAACCTGTTAAATATTAGTGACAATTGGGAATCTTGTCCAAAGAATTCAAGGCTAGGCTATTAATTGATTGATGGCAATTGGGTATCTGTATTCTGTAATGTATGTCCATTCATTTTCAGCTTGTGCATTTTTGTTTTTCATCTTGCCAAATGTTATGTTCAAAGTGATG
Gma.4348.1.S1_at	BQ273151	At2g27230	1e-63	Unclassified - Hypothetical Protein Supported by cDNA			GATACCAGCAACTGGCAGGCCTAGTAGTTTGCAATGAACTACCTACTTATAGTTTCTTGGTCTGGATGCTCTTGGGAGAAAGAAATCCTCTCTTAAGATGAATTTAACTTTGTCTAACTACTGTTTCATCTCAGTTTGGAGGGGGATGAGTTTAGTTAGTGAAGAACTTCTCAAGATTAATATGCTTTTGTATAATGTATATGCATGTTTCTTCCTGTTCCTGCCAAGGTGACTTATCCTGTGGTTGGCCCATTTGGCAGTGTCT
GmaAffx.86504.1.S1_at	CA800674	At5g42200	2e-13	Unclassified - Hypothetical Protein Supported by cDNA			TCTTTTTCATTGTCATTCTTCACCATTATTCTGCAATATGTTGCTACTCATCACTCACTCTCATCACCAACATTTTTTAACAGTCATTTGGAATTATATCACCTNACCTCTGATGTTTTAAAAATCTTCATCATTTGCTCCCTCTCCACCCTTAAACTGGACATGCTCGATTCTGTGCTTCTGGCGCTTTTCTTGCCGTGCCTCGGCATGAGCGCCGTTTTCATCGTCTACATGTGCCTTCTCTGGTACGCCACCAACCACCACTCCGACCCCNCGCTACCGGCCAAGCCTGTCTCCGACACCGGAATCTCCCCTTCCCAGCTCGACAAGNTCCCCANAATCACCGGAAAGGACCTTCTCATGGG
Gma.13121.1.S1_a_at	CD396748	At5g48655	1e-20	Unclassified - Hypothetical Protein Supported by cDNA			CCAATATGTATGTCCCCTTTGGTTGAAGAAATGTCAACAAGGTGTGGTCATATTTTTTGCAAGAATTGCATCAGGGCTGCTATATCTGCACAGGCTAAATGCCCTACCTGTAGANAAAAGGTTACAAAGAACTCACTAATAAGGGTGTTTCTTCCTGCAACTAGTTAAAGGATCTCTATCCAATCATTAATTGAGGAGAATCAGGATTTAGGAATGTGAGAAGAAGCTTCATTGTACTCTGCAGAATGCTGAGTGGCTCTGTTGTTGCTGACATGTTTGTTGTAGCGGATGCTTATTTATTTTCAAGGAGCTGTTTCTCCTCATTAATTTGTCATGTAATACATAGGGATGCTCTGTTTTTTATT
GmaAffx.87546.1.S1_at	BE057344	At3g09320	1e-57	Unclassified - Hypothetical Protein Supported by cDNA			TAATGTCAATCACCCAAAATTGCTGAAGTGTAGGTGATCACGAGCTGTTTGCTGCATATACCTGAAGAAATTGACTANATAATGTGTATGCCCATGTGGATATTGATAANAGTCACTTNTTNTCTGCCTNCTTTTNCTNNCNTTTTNNNGCCCATTTNTTAGGCACANAATAGGNNTTCTTTCTTGCTTTCCCCTTCTTCCGGTCTTGTTAGGGTTTGGATGATGTGGGGTTACAGCTGTAGAGTTCTGCTGATAAACCTANNGTACAAATAGAAATTCTGAAACCGGCTCATCAAGGAAGT
GmaAffx.46002.1.A1_at	BI970093	At1g17970	0.001	Unclassified - Hypothetical Protein Supported by cDNA			TGCGGCTTGACCCTGAGTGACTCAACCCTTCTGTTTTTTTGGACAGCTTCCATTTTCATCCATAAATTTGTGTATAGTTTTTCATATCCAATACAAGCAAGAGTTTTCATTTTTTGCTGTCAATTATCATTTCATCCTNNNNNAATTCCTGCGATCCTTTGCGAGGAATTGGCAATT
Gma.1576.1.S1_at	AI856117	At1g19310	4e-68	Unclassified - Hypothetical Protein Supported by cDNA			GCCAATACATTTCATGGTGTCCATGCTCATGGATTCCCTCTGCGCACCCATCAAGGGCAACAAGATTATTATTTGAAGAAGCTTCTTCTATTTGTTGTTTTGTGTGTTGTTCTTGCTTTTATATGGCAATAGGTTGGATACAATCTCTAGCAGTATCTGACTTCTGCTCTGATAGGTCTTCTGATGTGCTCTTTGTTTTGTAACTAAGGAGTAAGGATGTTGTTCATATGATAATACTNTCTTATTAANNNNNNANNTCTTTTCTTTGTNANANNNNNNNGGTTCCCATGGTATCCATGTGCAAAAGATATAAAGCATGAAAGCAATGCACCCATTGTTAGGAATAAGGATCTGGGTACCGGTCCGTAGATATTAATTTCTTAGTTATTATACTGAGTT…
GmaAffx.18801.1.S1_at	BI471612	At5g20885	1e-35	Unclassified - Hypothetical Protein Supported by cDNA			GAACAGAATCCGATGAGACCCCAGCCGCAGAAGCATGTTGTCAGAAGGAGTACAACAACACTCTTGTGCTGACGACGTTCGGAGAGATTAAGGAGAGGCTGCCGCAGACGGAGGAGACATGTGCGGTGTGCCTGAGCCAGCTGAGCGTGGAGGACGAGGTTAGGGAGCTGATGAACTGCTACCACGTGTTCCACAGAGAGTGCATAGAGAGATGGTTGGAGCACGAGCATGAGAATCACATCCCCACGTGTCCTCTCTGCAGGGCTCCTTTGCTGAGTTCTTGCTGCCACCACAGCTCCACCACTTGTGTCCCTCCTCCTCAGCCTAGTTGGGCTGTGGAGAGACTTCTATATCTCTTTGGGGATGATCTCTTGCCTTGTTAGTTCTTTATTAGATTCT…
Gma.10919.2.S1_at	BG511742	At2g36320	6e-49	Unclassified - Hypothetical Protein Supported by cDNA			GCGGAACAACGTTTTGTGGGAGCCACAGGTACCCCGAGAAACACGCGTGTGGCTTCGATTTCAAGGCGGTGGGGAGAGAGGAGATAGCACGGGCGAATCCCGTGATCAAAGGCGAGAAGCTACGGAGGATTTAATCTGCGCCGTTGGATGATCGAAGCGAT
GmaAffx.70823.1.S1_at	BQ743055	At4g15120	5e-05	Unclassified - Hypothetical Protein Supported by cDNA			AAGCACTTCATTATTCTCCAGTAGGAACACGGGTAGCAGTTTTTTTTGTTTTNGTTTNTCTTTGGTCCGCATGCTGAGGCTCGAAAGTGACATAAAGCAGACAGTTAGGTGCTAACTTGGCCAGAATTGTTGACCANCCAATGTTAAAATACTATTATNNTAATAGTACACTCTTCTTTAGGTTTTTAATTACTTTTATTATTACTACTGTTATTTACTTTTTTTTTTTTTTACTTTTAGNTTTTGTTGTTGTTGTTGGAATTGGGCTCTGCTTCTAGATAGCCCTGGATGGCGCAACCAATCCCAATGC
Gma.17588.2.S1_a_at	AW351318	At1g15750	2e-32	Unclassified - Hypothetical Protein Supported by cDNA			CAACCACTTGTAATCGCTGCACACCCACAAGAACCAAATCAGTTTGCTTTAGGACTGTCGGACGGTGGAGTTCATGTTTTTGAACCCCTTGAATCTGAAGGCAAGTGGGGTGTGCCTCCTCCGATTGAGAATGGGTCTGCAAGCAATGTGGCAGCTACTTCAGTTGGACCTTCAGATCAAGCTCAAAGATGATCCATGTCAGCCGAAGGGCACTCTCTCCAATTCAGTTGATCCAGCTAAGTTAAATCCATNCNTCGTACATGCCAAAGGTTTGGAGCAACTCANTTGGNTGNANNNCNAAANNNNNNTNNNAATTTGCCAATAGATGTGAAAAATTCTTGTTAAGTTTAATGCTAAGATGATGTACA
Gma.17588.3.S1_at	BI426637	At1g15750	0	Unclassified - Hypothetical Protein Supported by cDNA			GTACTTAAGTTAATGCAGGGCACTCTCNNCAATTCAGTTGATCCAGCTAAGTTAAATCCATCAATCGTACATGCCAAAAGTTTGGAGCAACTTNTTTGGTTGNAAGACCAAAATCACATTGTAATTTGCCAATAGATGTGAAAAATTCTTTTAAAGTTTAATGCTAAGATGATGTACAAGTCCTTTTGAGTACTTNCAAGTTGTNTTNNGCTATCTAATTAGATTGGTTGATCCTAACATGTTGCCTTT
Gma.13620.1.A1_at	CD401752	At5g60960	7e-06	Unclassified - Hypothetical Protein Supported by cDNA			AGAGAAGCCGCCTGAAACAGATTCGGCTGAGTTATGTGAAGAAGCCCAAACGAGTGATGGGTCGTTGATCATTTTTTGTACTTTAAAGGTTTTGGAATATATTTCCCTATTTAATCATCGTTTTCTTTGTCTCATTGTTAGTTTTGCATATTCAGAGATAAATCTTTGTATGGAAATGGCTCCTCTCTAGGACATATATGCCGCCACATATTCAGAAATAATTTTTTGTACTTGCTGCTTTATGTTGGTTCTGCGTC
Gma.5097.1.A1_at	BI969945	At4g28706	0.0008	Unclassified - Hypothetical Protein Supported by cDNA			CGTAGAGGTCTTCCATACAGCAATAATCCATGCCTGGCATCCTTTACTGAGTAGAGCCCTAAACTGTTCATCAAAATTTTCAGCGTAGTATGCAAGAAACAAGGCTTCAGCATATAAATTATGCTGTTGTATCCCAGTTTAAAATTAATCATTTAGCCCAACTATTTTATTTTTTGGTAGCAAACTGTAAATTGAATTGTATAATTTCAGTGTGATAGATTTGTAGGATGATATGTTGTTGTTGGGAAAAATTANGCAATTTTTCTTCTTCATAATCAGATTTGTAAAAGCTAAATGAATGTAGAATAACAATAAACACAATTGGTAACCAAGTTCAGCCATTTTTT
GmaAffx.57427.2.S1_at	AW307329	At2g45620	1e-128	Unclassified - Hypothetical Protein Supported by cDNA			CCATTATTGGGCATATTGTCATGATTATGCAAATACTGTTATATCTGTACGCACTGGAAGCATAATCAGCAAGCGAGAGAAGGACTGGACAAGAAGGATAGGTAATGATCGCCATTTGATATGTATAGAGGATCCTTTTGAAATATCTCATGATCTAGGTCGAGTGGTAGATAAACATAGCATCAAAGTTCTCAGGGAAGAGTTTGAACGTGCTGCTGAAGTTATGCAGAATGATCCAAATCCATGTATTAAACTTTTTGAGCCCTANNNNCNNNNTNNNNNTNANTNNNTTGTTTTGAATATAGATTTTATAGGTTTGGTAATGGACACTCAGCTTGTAAAGCTTCTTTTGTCACATCTCATATATTAACCTAGTCTCATGTTTACAAGTG
Gma.3692.1.S1_at	BE659812	At3g10500	5e-11	Unclassified - Hypothetical Protein Supported by cDNA			GGTTTAGCACTGTAATATCCACTGGGTTTTGTCAACCGGATGTTAATTCGGATGCTTTGATACNTGTTTCTGGCAAGACTGCATTTGTGTTGTCGCATGGCTGGATTTTCCTGACTGGTTTCTCTGTTCTTATTCTTTCACTGAGTTGCAAGATCGGAAGCATCATGTATACTGGTAAATGACTACAAATAAGGTTGACGGCTACTAGAGAATAAGGAGCAGTCAGTTAAGTATAATTTAGTGTTTGGTGGTACTCATTGAATGAGTAGGATCCCGTGACTTTGTAGATATTTTTATGGTACCTTAGTCAATCTGATCTATACATTCTTCATCGTAAAATATACAACATTTTTAGGGTGCCTACAGATAGAGTAATAGCAAATACTGTCTTCGATAAGA…
GmaAffx.93424.1.S1_x_at	CF809149	At4g05050	7e-98	Unclassified - Hypothetical Protein Supported by cDNA			TCAAAACCCTAACTGGCAAAACAATCACGCTAGAGGTGGAGTCCTCCGACACAATCGATAACGTGAAAGCCAAGATTCAAGATAAGGAAGGGATTCCTCCGGATCAGCAACGTTTGATCTTCGCCGGAAAACAACTCGAAGACGGCAGAACCCTCGCCGATTACAATATCCAGAAAGAATCGACTCTGCATTTGGTGCTTCGTCTCCGCGGAGGGATGCAGATCTTCGTGAAAACCCTAACCGGCAAAACGATTACGCTAGA
Gma.1494.1.S1_x_at	BF598755	At2g10940	2e-30	Unclassified - Hypothetical Protein Supported by cDNA			TCTTTGCACCACTCTTAAACTGAAGCTTCTCAACCTCAACATTTATGTCCCACTTGCCCTTCAGCTCCTTGTGACTTGTGGCAAGTCTCCTCCTCCTGGTTACACGTGCTCCCTCTAAACTAGNTGGAAAGGATTGAGGAATATATGGTCAAAATCGACATGAGAGGATGTCGAGCCACACTATCTCTCTTCTCTTCTGATTGGAACTGCTGTTGTTTGTTTTGCTATTATTTGTAAAACCATTTGTTTTTAATTGAGATCGTTGCATGTATGGTTTAATATAATCTTAGGCAAGTAGCAGCAAAGATGCTTCTCTGTGACATGTTCAATTATTAATTTATATGAATTGCGCTTTAATTTGTTGAATANANNANNNNNNNNNTNNNNCTTGTTGNANAN…
GmaAffx.55783.1.S1_s_at	BQ080839	At2g17230	7e-16	Unclassified - Hypothetical Protein Supported by cDNA			TAATCTTAACGGTAGGAATGGACGGAAGTTTCTAGTGCAGTGGATTTGGAGCCCCGTTTTGAAGGCTTGTGCTGGGCCCAATGCTTTGGATTGAATTCCTTCATACATTACAAGCTCTGCCTGCTACTCTTTTTTTGCTTACTTACCCTATCTATGTATCATACACCTAATGATGCTTTT
GmaAffx.1843.1.S1_at	BU548705	At5g54855	4e-49	Unclassified - Hypothetical Protein Supported by cDNA			AAATCCATGGAAGAGTTGTTTGTGANGTTTGTGGGGATTCTTCTCTNGGACCTGAAGACCATNTTCTNGAAGGTGCTGAGGTTGCTGTTCTTTGCATCACCAANTCTGGGGANGTTCTAAATTATCAGGCATTCACTGATGCTAAGGGGATATACACNGTGGCCGANACAATGCCGGANAGTGATCGNTGGGATGCNTGTCTTGCCCGACCAATCAGTAGTTTCCANGAGCAATGCACTCAACTTGGTGAAGGCAGCATNGGGGTTAAATTCAGTTACAATCATCCATCAGGACATTCACACACTGTCAGGACCTTTGTNTATCGACCCACCAGTGTTCCAACTTACTGCATTTGATATATANTANTGNNTNNNTNTGAATCTGANANTGNNTATGCTT…
Gma.15996.1.S1_x_at	BQ454193		1.1e-23	Unclassified - Hypothetical Protein Supported by cDNA			TGAGAAACCCCCAGTAGAGAAGCCTCCAGTTTACAAGCCCCCAGTTGAAAAACCACCAGTGTACAAGCCACCAGTTGAGAACCCTCCAATTTACAAACCCCCAGTTGAAAAACCACCAGTATACAAGCCCCCAATTGAGAAACCTCCAGTTTATAAGCCACCAGTAGAGAAGCCACCGGTTGAGAAGCCTCCAGTCTACAAGCCACCATATGGAAAGCCACCATACCCAAAGTACCCTCCAATTGATGACACCCATTTCTGAAGGATGTCAAGGGGTGTATTAAGTATATGCTAAATAAGAGGTGCTAAGAATGTAGTTTATAGTTTGCAAATTATTGCAAGGATTGCTCTTAGCTTCTTCATTTCAANCATTTGTTTACACTTTACAGTGCTATGGCA…
Gma.3921.2.S1_x_at	BG790883	At1g80950	1e-143	Unclassified - Hypothetical Protein Supported by cDNA			ATTTAGCCCTGCCTGGGATTCCATATCTGGAGTGCGCCATGTGATATTTCTCCTGTGTCAGTTTGTGAATTATATGGAGGTGATCCGATTACCTGTTTACCATCCTTCACAGCAGGAGATGGATGATCCCAAACTATACGCTAATAATGTTAGAAGGTTGATGGCTACTGAGGGTAATTTGATACTTTCTGATATTGGGCTAGCTGAAAAACGAATATATCACGCTGCTCTNAATGGTAATAATAGCNTGCCTAGTGTTTTGCATCAGAAAGACGAATGATAATTTCATGGCCCCCNGTCTCAAATGAAATGTAGTTCCNGTCGAGTTTTAGTTTCAAACTTAGTATCTGNTTATGAATGGACAGCTTGTGTGNNANGGGTATNNNNAGCTAAATAGTA…
Gma.2034.1.S1_at	AW277558	At1g34780	2e-65	Unclassified - Hypothetical Protein Supported by cDNA			GAAGCGGCTAACACAGTCATTTAACCGTTTGAAAGAGCCATACAAGAGAAGTAATCTGCAGGAAGGAGCAATGAATGCTAGAGCATGGGCTTCCAAGTCCCTTGCCACCGTTTCAATTGGAGAGGAAAGCAGCAGCAGCCGTGGGACGCATCAGTGAGTTGACTGTACTGAGCGGATTTTCCTTCTTAAAATTGGAGATACGAATATACCCTATGAAAGGCTTGGCTGCAAGTTATGCCATGTACTTTTGTTTCAGGATCATCTTCACCCCCTCTGGCCTCGTGCTTAGTGAGGTCAATTATGTTTCTGAGTGATGTAATCGTCCCTTATATGTCCATATGATCAACAAATACTTCATTCAGCGCTCTAG
GmaAffx.20850.1.S1_at	AW164293		0.0004	Unclassified - Hypothetical Protein Supported by cDNA			GTGAGTGCTACTCGCAAGGTTTCTGATCCCATTGAATCTGATCCCGTTGAATTCAAGGTTTCTGATCCTATTGAGTCCGATCCCATTGAAAGTAAGGTTTCTGATCCCATTGAATGCAACGTTTCTGATCCCATTGAATGTAAGGTTTCTGATCCTATTGAATGTGCTCCAACACCTGAAGGAGAAACTGCTTAGTAAGGTTTAGCTTTTTCAGTAGCTCAGTAGCACTTGATTAAAATCTGTTCACACCAAGTTCAAAGCTGCAGGTTGTTTATATTTATAAATTATAATGTACAGAGCTTTATCTTGAAACCGAGACCT
Gma.9722.1.S1_at	BE823732	At1g05720	4e-56	Unclassified - Hypothetical Protein Supported by cDNA			AGTCTGCATGAGGAAACTTGTTTTCTATCCTGAAGTTGTNNGCTTTATTGAAGATGAAAAAGATCAATTTCCATCAGTNAANGTTCAATATGTTTTTAACTCTCCACCAAAGCTAATTATGCTGGATGANGNGGGTCAGCAAAANGAAACAATCAGNATTGATAATTGGAAACGTGAGCATATACTNCAGTTCCTGAGAGAGAAGGTGAAGCCTCTAGCNTCTGATTGAGANNATCTTTAACCCATTCTCTGGCATGCTCTGGACTCGTTCCCATTTAACAGAAAAGAGTGGGAGTATATAGTGTGGCTTAGACAAGTGAATTAAACTTGCCCTGGGTTACAAGTGACCTTAATAACATAAAATCATCATAATTTGGTCAGTTTAGATAATTCTGGGTT…
Gma.7139.1.S1_at	BI971209	At5g58640	8e-70	Unclassified - Hypothetical Protein Supported by cDNA			GCTGGTGACCAAATATTCCCTAGATTGGGAATTACACCACCACCATGGTNCTATTCCTTGCGTGCCAATAAGTTTAGAAGTATTGCAAGCACCTGGCTTCTTACAAATTTTCTTCAATCCTTCCTACAAAGCTCTGGTGCTTTTGAAGTATATTGCAATGGCGACTTGGTTTTCTCCAAACTGAAAGAGAACAGATTTCCTGGTGAAATTGAGTTGAGGGAACTTGTTGGGAGAAGATTAGCTAATACAAGATTTGTCAGTGGTATTGAAGGTGGTGTTGGGCTCTAGTTAGACCCTGAGAAGATACATCACACAAATTGAAGCCTGCAAAATGGATGTTAAAGAATTAAATTTTTAGTTAGTGTTTGTGTAATTTGTTTTGTACACTGTTAGGTGAGC…
Gma.832.1.S1_a_at	BE821686	At1g14340	1e-50	Unclassified - Hypothetical Protein Supported by cDNA			GCTGGAACTGCTATAGCCAACAGTAGCTACTTTGCCAAAGGTGCTCTTTGGGTTTCGGATGTGTTGACACGTGCAGCGAAAGCGGCTGCCGATTTGGGTCAGAATGAAAAGAAATGAAACTCCAAACATAAACTGCTGTCTAATATGTTAACTTGTTGAACACAAACAAATACCAGCATTTGTTTGTTGCTATTGTATTATAAGAC
GmaAffx.85044.1.S1_at	AW734534	At3g18760	1e-15	Unclassified - Hypothetical Protein Supported by cDNA			TCAAACATTTGCTTACTTACGGTACTAGGTATCAATCAAACATGACCAGTGGGCTCGAACATGTTATTTCATAAACTCCGAGCTGTCTCT
Gma.7693.1.A1_at	AW348250	At5g06360	4e-37	Unclassified - Hypothetical Protein Supported by cDNA			CTTGTTTAAGGTCGCATCAGGGTTCCAACTTGATTTCAGAGGCAGTGGTCTGGTACCTCTCCTATGATTTTTTTTTGGGCACAGGTTCTAAAATTCTTGTTTGGATTGTCAATGCAATGATCTGATCTTGCACTTTGACATTTGAGATAACTATTGTACAAGAGTTAAGCCAAAC
Gma.6922.1.S1_at	BU545996	At2g03120	3e-34	Unclassified - Hypothetical Protein Supported by cDNA			GATGAACTGGTTCCAAGCTGCTCAGCCTGCCCTTCTATACATTGTACCTTCTGTTATTGGGTTTTTAGCTGCTCATTGCATATGGAATGGTGACGTCAAACAGTTATTGGAGTTTGACGAGTCCAAGACTGCCAAATCATCTCAAGAGGAGGGTGATGCCAAATCTAGCAAAAAGGTTGAATAAGTCGAAGCCAGTTCAATACCAATACTTTTGAGTCATAGAAGAAACATTTGGTTTTCTAGGAACCCCCATTACCTGTAATGCTATGTTATTCAGCGGCAACGTCTGTAAAGATTTTGATTAAGAAAACTAACTAGCCTTATTTTCAGTGTAGGATTTTGCTTTTACTTC
GmaAffx.71118.1.A1_s_at	AW349718	At4g34660	4e-21	Unclassified - Hypothetical Protein Supported by cDNA			GAAAGCAGGTTGGTTTCCATTTGGTTACATAGAAAGAAGGGAGCGAGTCCTCGCAAGCAAGGTGGCTGAAGTGTTTTGAATGTTTCTGTTTGGTTGAGTTGGTGGTTTCCTGCCTCAGGGATTATGTATGTGCGTATGTTTTGGTTTTGTGCTTAATGGATAACGTGTGCTTACTGCTTAGCATACAACAATCGATTTGTGATATATAGATGAC
Gma.6264.1.S1_at	BQ612558	At1g78020	9e-16	Unclassified - Hypothetical Protein Supported by cDNA			AATAAGGAGCACCACCGTGCATCGCCACCGGGCGCCACCGCGAAGGCTTCTTGTAATTGAAGGGTAATTTGAAAGGTCATTGCACAATTATAAGGTGAAATAGTACAATATATTTNNGGAGAAAATTAAGAAAGAAAAAGGCCAAGCAAGCTAATTAACTGGTGCCTCATGTCATGTGCACTTACCACAAGGCTAGCTATATCATCTCATATCTTCCGCCGTCCCTCTTAATTTCATCTATATATGGTTCTTGATTTCACACCTACGCTACTTGTTCGTTCTTATTGACATAATTCTGCTAGGAATTAAATTGTACAAAATTAAGGTGTGGTACGCTGTTGCTGTATTGCTTATGTCAA
GmaAffx.64032.1.S1_at	CD390751	At2g44670	2e-10	Unclassified - Hypothetical Protein Supported by cDNA			GATATTCATATTGAGATGCCGTTTTGTTTTCCTGAAAATCGAGGCAATGAGAAAAAGTATCAAAGACACTTCATCGGAGATCTAGATGAGTAGAAACTGTTAAGGTCTTCCAACATCACGTCCCCATCATGGCAAATT
GmaAffx.42135.1.S1_at	BQ134108	At5g52190	4e-53	Unclassified - Hypothetical Protein Supported by cDNA			AAGCAGCTTCAATGGGCACACAAATATGCACCCAAATAGCTTCCATATTCTCAAAGCCCACCCATCCATACCCGGCCCCACTAGACCTTTTAGTCACCGAACTCACCTCCGTTGCCTCTCAAAAAGGCAACGTTTTTCTATACGGCGTGGGCCGCGAGGGCCTCATGCTCAAGGCCCTCTGCATGCGCCTCTTCCACCTGGGCCTCTCGGCCCACTTTGTCTTCGACATGACCACACCCCCCATAGCCGCCGGCGACCTCCTCATCGCCTCTGCCGGCCCCGGCGGATTCTCCACCGTCGATGCCCTCTGCGCGGTGGCGCGCTCCAACGGCGGAAGGGTGCTGCTCCTCA
Gma.6058.1.A1_at	BE658507	At5g04850	3e-08	Unclassified - Hypothetical Protein Supported by cDNA			GGCAGTGCCACCTGGCAGATTCAATGCCCAGACTGAGGACGAACTGGGTTTACCTGCTGTCCCTCGGGCATCCATACGCGGTTAAAGAATGTTTTTTTATATCTTGGCATAGCTAGTGAAGTCACGAGCAAGCCCTTGTAAAGATGTGCAGATCTTGAGAATATTGATTGATACAGTGATTTAATTGGTCTGGTGTTTCCATTATAGACTTAGTGCCTTTTATTTTCCCTTGTAATAAACCATGTGGAAGCATCTTTGTTTTTTGTATGAAGCTTTTGGCTC
Gma.1115.1.S1_at	BE822650	At5g64270	2e-77	Unclassified - Protein with Unknown Function			TTGCTGAATTATGTCTGGCCAAACATTTTTGAAACTTCTCCTCATGTGATTAATGCTGTGATGGAAGCAATTGAAGGGATGAGGGTAGCGTTGGGAGCAGCTGTTGTACTGAATTATTGTCTACAAGGACNCTTCCACCCTGCACGAAAAGTTAGGGAGGTATATTGGAAGATCTACAACTCTCTCTATATTGGAGCCCAGGATGCTCTTGTAGCATCGTACCCTGCCTTGGAGGATGAGCAGAACAATGTTTACAGCAGGCCAGAGTTAATGATGTTCATCTAGTTGGATTTTGATTAGTTAGTTCATTTCTGTCTCCAATATATTTGGCAGTTTTCAGTACTTCCTCGCAGCAATGTAAAGCTCAGTTGTTTGAACATTATTGTGTCTTGTTACATA…
GmaAffx.13929.1.S1_at	BI701310	At5g64270	6e-06	Unclassified - Protein with Unknown Function			GCATAGCAATGTTTACAGTAGGCCAGAGTTAATGATGTTCATCTAGTGTGGATTTTGATTACTTAGTTTATTTCTATCTCCAGTGTATTTGGCAGTATTCTGTACTTCCTCGCATCAATGTAAAGCTCAGTTGTTGGAACATTATTTCGTGTCTTGTTACATAGATAGCAGGTTCCTCTCTTGATGACATTTGTTTGATTTGTATCTCACCAGATGATATGCTTATAGTAGCTAACCGTTGAA
Gma.8041.1.S1_at	CD390554	At3g17210	8e-46	Unclassified - Protein with Unknown Function			GTAGTGAAGCACGTGCTCCTAGCTAAGTTCAAGGACGACGTCACTCCAGAGCGGATTGAAGAGCTCATCAAGGACTATGCCAATCTGGTCAATCTCATCCCACCCATGAAGTCATTCCATTGGGGCAAGGATGTAAGTGCTGAAAACCTGCATCAAGGCTTCACTCATGTCTTTGAATCAACCTTTGAGAGTCCAGAAGGCGTTGCAGAGTATGTAGCTCATCCTGCCCATGTTGAATATGCAAATTTGTTCCTTTCCTGCTTGGAGAAAGTCATTGTGATTGACTATAAGCCTACCGTTGTTAAGCTTTGATTGGAGAAGTAAAGCCTCGTTCACTGCTAGTGTTCTTATAAAAATAAACTTTGTTTTCTGTCTAAGCAATTTCTGTATACACTACGA…
GmaAffx.32575.3.S1_at	CA802910	At3g59280	9e-44	Unclassified - Protein with Unknown Function			GAACTTAGATTTTCTCCATTTTATAACCATTGTGTAATCATTTTTGCCTCCAAGTTTGTGTTGTACTATTTGCGTAATCAAAAG
GmaAffx.32575.3.S1_x_at	CA802910	At3g59280	9e-44	Unclassified - Protein with Unknown Function			TCAGGGTACCCCTAGTTGAGAACTTAGATTTTCTCCATTTTATAACCATTGTGTAATCATTTTTGCCTCCAAGTTTGTGTTGTACTATTTGCGTAATCAAAAG
Gma.17308.1.S1_at	AW396421	At5g04990	7e-46	Unclassified - Protein with Unknown Function			GGTGTCATCAACACGGTAAGGCTTGATTTTACGTCCAACCATGGAAGCCCTTCACACACATGTATATATCGCTTTAGAGTTCACGGTCATGAGCCTGACTCGGTTTCTATGTTGGCACAGGAGTTATAATGCTGTCTTGTTTGCTTTGAATTTTGTCAATTTCTGTGTAATTGTCCAGTGTATTTTCTTTAGATGTAGGATAGGATGTCATGGACTCCTTAATTACTAGATGCAGAAATTTAACTTCTTATTGCTGCTTCAAATGGACTTTG
Gma.6327.1.S1_s_at	BM731752	At3g48140	9e-32	Unclassified - Protein with Unknown Function			GAATTCTTGAGAATTTTGCAGAGGGAGAGAAATATTCACAACATAGCCTGAGGAAGTATGTTCGCGGCAAGCAGCCTCAGATTATGCCATCCGTCAACAACTTCTTCTCTGATCCATCAAACTAAAGCAAAT
GmaAffx.89377.1.S1_at	CK605818		1e-12	Unclassified - Protein with Unknown Function			TAACGGCGAGTGAAGCGGCAACAGCTCAAATTTGAAATCTGGCTCTCGGGCCCGAGTTGTAATTTGNAGAGGATGNTTNTGNNGCGGTGCCTTCCGAGTTCCCTGGAACGGGACGCCANAGAGGGTGAGAGCCCCGTNTGGTNGGANNCCAANNCTNTGTNAANCTCCTTCNACGAGTCGAGTAGTTTGGGAATGCTGCTCTAAATGGGAGGTANATNTCTTCTAAAGCTAAATACCGGCCAGAGACCGATAGCGCACAAGTAGAGTGATCGAAAGATGAAAAGCACNTTGNNNNGGNGGNTNNNNNNNANNNATATTGAACCCACCGTCACGGACGC
Gma.2529.1.A1_at	CD399884		2e-15	Unclassified - Protein with Unknown Function			TCCTCGTCACATCAACTAATCAACAATCTTCACATGCTTATTGTTTTTCAATGTATATACATTTTTTTTCTAGAGAAAAAAACATGAAGTGGAGTGTGTGTCTTATAAGGATATTTAGTAAACATTCTATTAGAGTTAGTTACTGCTAAATGGATTGTTATGGTTAGTTACTTGTTGTGGCCACTAGTCAGTGCTCAATGCTGAATATAAA
GmaAffx.34785.9.S1_at	BI945036		0.0003	Unclassified - Protein with Unknown Function			ATCGGGATGTTTTTGTTGCACGGCTCCATGCTTGCGCATGCAACGTGTGACATGCATCCTTTTCATTGTCACCTTAGCCTTCGTGGCTTAGGTGCTGACGATTGGTTCCTGTGTTGCCTACCTACCAAACGGTATTCGTGTGGCTAGTCAGACCCATTCCATCCAGGCCTCTTTGTTGGGGACGCTGGAGGATTTCAAAGTCCCACACGTGAACCACGTTAGTCGTCCATCATAACGGCTTCCTGTGGCACACGTGTGGTGATTGTTCTCTCGGATGCGGTGCATGCAGTGAACGTGGGTGGTCTAGTGCCCCCACATTGTTCCTTAAAATCGGTTGTCTCGGATGACGCTTGCCCTGGCGCTTGCTTTGTTCAACGCGATGCTACTACTCTTAGTTAG…
Gma.5192.1.S1_at	CD410634	At5g41940	9e-69	Unclassified - Protein with Unknown Function			AATTGCCACTGCTTATTTACGAGACTCTGATTTCGACAATTTTGGCTCATGTGGGNATTGAAGATGGCTAGATTTAGATGGCATGGCTGCTTGCTGAATTTTGCCACTGCTTAATGCTTATTTACGAGGCTTAGTTTCGACTATGTTGCCTTAATTTGGGGCATTGAAGCTGGTTAGATTTAGATGGCATCTTCTTTTTTTTACCTCTTTATTTTTCACGCTGGCTCCATCCTTTTCTTTTCTTTTCATTTCTTTTTCAATTCTGATTTGGGACACATCTCGGAGCACCTTTGCGAAAAGCAGGAGTGGTAGGTGCATGTAACCGTTTNATGAAGAGGCTGAGANNTNNTCGACANTTATGATGTTGTCCTTTTTGACTGAAGGCTCA
Gma.4470.1.S1_s_at	AW156251	At3g54040	3e-52	Unclassified - Protein with Unknown Function			CTGTTGGGATTTCATCTGATGCCTTCTTTGAGCCTCAATTCACCGGCAAGCTTTGCTCTCCTGCATGTTACCAGAAGTGCCCCAACATTGTTGACCTTTTCTTCAACTTGGCTGCTGGAGAGGGGGTATTTTTGCCAGAACTGTGTGAAAAGCACAAGACCAACCCTCGTCGTGCCATGGTTGAACTTGTGAGCTCAGGAGCTGCCCCTGGCCCTGTTTCTGACGTGTCAGAGGCCATTATTGCATCAGCACCTGCCCCTTCTGCCCTGTAATTTTGGTCCCTTGAAATTTCACTCTCCTTTTGCAGAGATGGTGTGAAATTGAGGGAGACATTTACCATTATTATTATTGTTATTGTGTCACTATATTAGAAAATGGAGAGTATATTGCTTCATTTTT…
GmaAffx.36084.1.S1_at	CD406632	At4g28040	3e-70	Unclassified - Protein with Unknown Function			GAGGTGTACGTTGGAAGTTTGGTAGGNGCTGTTGGAGTTATTGCNGGTTTATATNTTGTGCTTTGGGGTAAAGCCAAAGAGTTTGCTGAGATTAAACCAGAGGCACCACAATCATCAAACTTACNAGATGATNNNGANATAAGTAGTAGGATAGATTTGGAACAACCCCTTCTATCAGAGAAATTGTCTGAACATGCA
Gma.2929.2.S1_a_at	BU548979	At3g63460	0.002	Unclassified - Protein with Unknown Function			CCTGGTTAGGTTCACTCAAGCGGATGATCAAGACAAGACAGAGCGTGAGACTAAGTTAAAAAAGTTACAGATATCTTTTTGCTGATTTTGGAAATTTTTCATGTGATTAGCATCTTGCAGTAGTGATTGCTGATCCTCCTATCAATGTACACAGACTGTTGCCATCTCTAGATTTCAGGTGCAGGGTTTTGATATGTGCTTCTACAATTTCTTGCTGTGTCTGCAGCTTTCACATCGA
Gma.17760.1.S1_at	AW471993	At4g32760	8e-35	Unclassified - Protein with Unknown Function			AGCTTCTACCACATCGTATGCTCCATCTGGGAAGCCTTCCAAGCCAGAGGATAAGTTATTTGGAGACCTTGTTGACATGGCAAAAGTGAAGCCAAAACCCACTCCAGGCCGAGCTGGTAGCATGTAAAAACTATATTATCGGGTTTGCACATTTCAGTTCTATTGCTAACTTTTGTCCCCGATTTTCCTTGATTTTTATTTTTATGTTTTTATATTATATATAATTTTTTTGGTTCTTGTTTCATATTGTTTGCTTGTCTGGGAATTAGCATTTGATTATGTACATTCGTTCTAGAGAAAACATTGAGAAGTAGGGGAAAAAGGGCTAAACCATTGGGTTGGATTGTAGTTTGTGGCAATTTTACCTTGTATTACATTCCCTTCGATTGTAGTTATGGT…
Gma.6889.1.S1_at	BI975081	At3g62550	1e-38	Unclassified - Protein with Unknown Function			GCTTCTGTCGCTTATGTGTTATTTGGGCTCTGTGTGTTTTGTTTGTTTCTCCTCTAAAGGAATATCTCGCCAAATATTAAATGTTAAAGGCTAAGTGAAGATGAGGATGCACGCCTTTTGGTTTTNACNNNATTATTTTCTATTCAAAAGTTTCCTATTCGTTTGTTACTTTNANANAATTTGTACTCCATGTTGAACTATTGAATATTGATAATGCTCCTAAATCATGATAAAGTGAAAGTAAGTGAAGTAAAGAATAAAGAGAAGAAAATGTTTAGTATCCAA
Gma.5442.1.S1_at	BM094097	At4g07410	1e-94	Unclassified - Protein with Unknown Function			GTTGTTGTTTACAGCTCCAGGGCTATGTGCTTGATTGACTTTGGNTTGCCNGTGGAGCAAGANGAAAGTGATATGCTAAATACTAAAGATTCAAGGGCAANGAATTNACAAAATTTTAATGTTAAGAAGAGGATTGAAGTTANNNNNNNNNNTGAAGNNANGAANGAACATAATAGGAGGAANTTTGAAGTTATACCTTTCGAGAATCCTGTTTTATNTTTAGGTCATACTNCAAAAAATTCCATCTTTATGGTNGACAAACCNTGGTTGCAAGTNGTNAAGAGTTTAGAAGGCCGACCAGTCCACAGACATATATATGGGACATGAGGCATTAAGCAANCCTAGAGAATTGTTCTCAGCTTGAGGGGNATACATNANGGGGATAAAAGTNCCTTGTTN…
GmaAffx.68730.1.A1_at	BI970616	At2g18280	6e-07	Unclassified - Protein with Unknown Function			ATATGCTAGGCACAGTTAATCAGGCCTGGTGGGCATGCAACTGAGATCTTGGCTATGCAGTCTTTTAGTATTTTTCCTGTTGTGTTGTTAGTTGTTTATTCTGGAATTT
GmaAffx.1876.1.S1_at	BU551191	At1g12820	2e-15	Unclassified - Protein with Unknown Function			AGGGATGCCCCTCCTTTTGTTCTCACTCTCTGAAATGCTATCTCTACTCCTACATTGAGGCTCAAGAAATGCCCTTGCCTTTGGTTGCCTCCACAGATGGCAAAAATCCATACTGATATTCAAGACTCAATAANATNNNNNNNNNGAGGAAGAAAGGGGGATTCTGCATGATTCAACCTACAATAATGTTGCCAATGCTTGATTTTTCTCTTGGTACATCATAAAGCAAGCTTTTTTGACATCCTATAATTGCAATACTTGCCTTATTGAGATTATAGCTGGACCCACCAAGAGAAATAATGTAAACTATCCAGGAAGTCACAGCAAATGTGAGCTAAATTAATGGGTTCCTAAGCAATTATTGTGAACAATATCCATATGCATGAAAAATAGTGCATT…
Gma.16448.1.A1_at	BF426071	At5g58470	7e-26	Unclassified - Protein with Unknown Function			GATCATTATGGAAATCGTTCTCGTCCATACTGAGAGCTTGGACATTGAACGTTTTATGTACTATGAATTGTGGGCTGAGGGTTTAATTATTTCAGTTGGCTGGTTTCTTAAACTGGAAGCAAAGAGGTAGGTTGTTCACTCNCTTTGAGCAATACCTCTTCNNCGCTCCTTTTTGTTTCTAGCTGGTGGGTTTTGAATTNAAACCAGGGATTAATTTAATCATGTGAATGTTTTTTNTAGAGGNAAGTGGATANTCTCCCAATTGCTTGCTGCTAAGGTAGGTGTTGAATATTTCAGGTGAGTGCTGCTTTCANGATAATGTGCCTAATACTTGCTTGGAAATNAAACCATGTGTCATTANGTGGATAAATGCTTGCATTCCTAGCTCATCCCATGTGG…
Gma.7621.1.S1_at	BU765757	At3g27260	2e-08	Unclassified - Protein with Unknown Function			AAAGAGCTAGGATCGAAGCCCAAATTAAAACTGCTGAAGCTGCTGCAAGAATGAGGGCTGAGGAAGAGTCAAGGCAGCGGAGAGAAAAGGAAAGAGAAGCTTCACGAGCTGCAATAGAAAAGATGAAAAGAACCGTTGATATAGAACATAATATGGAGATTATTAAAGAACTTGAAAGTTTGAGTGGATGCACGCTATCTTATAAGGCCGTTGGCGGTAGAAATGGCTACAAAGTTGCATTGGAGACATTGGATAAACATCAGTTTGAGAACCCATTGGAGCGGCTTGGTTTATTTATCAAGGAAGACTTCACCACAGATCTTGATGAGGAGGTTTTGAACGGAGGCTTTGAAGAAGGGGAAATTTTTAACTGAATGCACCTTCATGCAGTTCTGCCAG…
Gma.10310.1.S1_at	BU545566	At5g07980	5e-34	Unclassified - Protein with Unknown Function			TACTAATGCTCAAAAATCGTTCCCCCTAAAATATGTTACTGCAGTTCCATTGCCTAGGAATCTCCCTGACAGGGTACAATGTTTTTCACTTTGATAANTTAATTAATTCATTTTTCNNTCTTTTTTNATCAATTGACTCCACAACCTCCAGTTTCTGGTCCTTTTNTNTCAACTNNNATTATTGCNNTTCATCGCCATAGAACCATACAACTGGCAATGTAGGAGAAGAATGGTACTAGATTGCCTCTCCAATCACCGGAGGNTGTAGATCTTTGCAATCTATATATGTATGTATGTGTAGATCTTTTCAATCTAGTTATCTTTTACTTTTGATTTTCAGGTTCCAAGCCATTTGTATATAGCAAAANTTANATATGCAGTCNNTTAAAGTTTAACCAT…
Gma.3611.1.S1_at	BU550489	At5g12200	0	Unclassified - Protein with Unknown Function			GTAAAGCGAGCCAAATCTAACACTTAAAAGTTTCTGATATCCTTTGGTCAAAGTTCAACATTTTAAGGAGCGGGGGAGACAAAGATGTGTGTTAATCCAGTTTTTTGCTTAAATAAAATAGTATATATATATATATACACACACATATGTATATTACAATAGATAATAGGTATGCTTCGTGTTACCTTTTCCACTCATGTAATGTTCATTAGTTACAGTCTAAATCTGTTAGAGAAGTCACAGTAGCTTTAATAAGATACTGTACACTACAGTATGTAGCACATTCAGATGATGGGAGCTGCT
Gma.6824.2.S1_a_at	BE661743	At5g32440	4e-58	Unclassified - Protein with Unknown Function			TGCTGATTATGAGGTTAAGAACCAAGAGTTGCAGCATTTGAAGCAATTGGTGTCTCAATACCAGGAGCAGATTAAAACTCTTGAGGTGAATAACTATGCTTTGGCAATGCATTTGAAGCAGGCTCAACAGAGCAACCCCTTTCCTGGGCGCTTCCCACCTGATGTCTTCTAATGGGGTGAATGTGTAGAATGTAATAATAAAGGCAGCAAACAGCTGGATTAATTATGTCGTGTTGTTTTTCTTTCTTACAAAGGTCAAGCGTTGTTGTAGT
GmaAffx.28624.1.S1_at	BQ297360	At5g14970	7e-33	Unclassified - Protein with Unknown Function			TTCGACCGTGGCTTCACCGTGATCGCCGCCATGCTCCGCCGCATCGAGCCCCTCGACAACTCCGCCATCTCGAAAGGCGTGTCCCCCGCCGCCNGAGACTCCATGAAGCAGACCATTTCCACCATGCTCGGATTGCTCCCCTCCGACCACTTCGCTGTCACCGTCACCGTCTCCAAACACCCCCTCCACCGCCTCCTCTTCTCCTCCATCGTCACNGGGTACACTCTATGGAATGCGGAGTACAGGATGTCTCTGGCGAGGAATCTGGATATGTCGGGTTCTAGGAATGA
GmaAffx.5977.1.S1_at	BU548613	At5g15540	3e-23	Unclassified - Protein with Unknown Function			ATAGTCTTGATGATGCCCGTTGTCAGGCTTATTCTCCTACCGAACAACCGAAACCTGGAGAGGTTATCTCCAGACAGAATATTGCTTTTAATATNGGTGATTCACAGTTCAGTTTGCCTACAAGTCCGCAAGAATTGATACAAAGATATCAGGAATTTAAACATGCNTTGAGGGAAGACACTGTGGACTATTCACATTACACTGCAAATATAAAACGAAAGCGACCTACANCNACNCCAAGAAGAGTTCAAGTTCGGAAACCTGTATACGTGGCAGGTGGGTACGACAACGGGGATGATGATGAGGATTATACTGGCGGAAGTGCGACACGCAAGATAAGTTTTAGTGGCCGCAGGAGTAGCCTTAAGAACTCAAGGCAATATGGATTGATGTAAAGTA…
Gma.8499.1.S1_at	AF118115.1	At5g43070	6e-26	Unclassified - Protein with Unknown Function			GCGACGCCGTCGTCAAACGCTTGATCGAGACCCTCTCCGCCCCCTCCGTCCTCTCCAAGCGCTACGGCACTCTCTCCTCCGACGAAGCCTCCGCCGCCGCCCGACAGATCGAGGACGAGGCCTTCTGCGCCGCCACCGCAGCCTCCGCTTCGGCCGCCGCCGACGGCATTGAGACCCTCCAGGTCTACTCCAAGGAGATCAGCAAGCGGATGCTCGACACCGTCAAGGCCAGAGCTCCGCCGAGTCCCGCCGCCGTAGAGGGCGTCGCCGCCGCCGTCTCCGACTAATTTTGTGTTATGCGATGATGTAGAGTTACTTTCTATTGTGTGCGTGTAGGTTTTTGNNNCATCCAATTNNNGTAATAATACTAATCCATCAGTTTTATTCTCATTATGTAGT…
GmaAffx.74850.1.S1_at	CA819374	At5g02050	4e-24	Unclassified - Protein with Unknown Function			ACCAATTTCTTGCAGGAATACATGTTTGCTAAAGACAACAAGGAATATTTGATGTGGCTGAAGAACCTGAAGAACTTCGTCGAGAAATGATTTGTTCTCTGAGGATCGTGAAATGTTGACAGAGGCCTTTTCTTTGGTATACACTGTATCATGAGAGAGTCATTGCTGTAGACTAATAATTTAAAAAAACTTGATGTTAAAAGGATTGTTTAGGCTATCTTTTGCAATTTAACTTCACCCATCAATCAATAGATCTTGGGTGGTTCTCCCATT
Gma.2761.1.S1_at	BQ743067	At4g27340	5e-94	Unclassified - Protein with Unknown Function			TCTCAGTCCATCACACAGGTGGTTATGAACTTGCCAAGTGAAGCTGCAGAATTTCTAGATGCATTTCGGGGAATATACAAAAATAGACCCAAGGATGGGGAATATACTTTGCCATTGATCCATGTTTATGGATTCTCCNAAGCACGAGATCCAGAATTTGATTTTCACGAGAGAATAAGAATTGCACTGCTAGAAGTTGCAGTCAATGTAGACATGAGACGGGTAAGGCTTGTTGCTCCTGGAAAATGGATGTTGTGCGCATCGTTNNTTCTCCCTAAAAGTGTAGCATTTGCTGATACTGCNNNAGTTGATACCTAAACANNNNNNNNNNNNNTATTTATTCATTGNATGTAGTAAATTTTGTTCCATTGCATTAG
GmaAffx.68621.1.A1_at	BI893889	At5g52300	4e-06	Unclassified - Protein with Unknown Function	Stress Induced		GAAGACAAGGCACTTTCTGAGTTAATTTCAGAAGCTTTACATAAGAAAAAGGAAGAGCCAGTGAAAAATGAGGATGGAAACTTGGATGACGGCAATGATAAAATGTGTGAAGAGATCAGTGTGAAGAGTCCAGGGAAAGGTGTGGTTGGCAAGCTTAAGGGTGTTGTTGGCTCTTGGTTTGGCAAAGCCGAGGAAAAAGGAGGTGAAGATTTATCCAAGAATACAAATTCTGGTGCAGAAGTGGAACAGGTTCACCAGGTTGTAGGTGAAATCAAGAGTGGTCCAATTGAAGAACAAGGGACTGGCTGAATTTCTTCATGGACATTGGATAATACATGTGTGCTGTGCTTTCCTTGTGATTAGATATTTGTATATGTTGGATTCATGTGTAAGTTATTA…
Gma.6862.1.S1_s_at	AJ319868.1	At1g48620	7e-32	Unclassified - Protein with Unknown Function			CATTTAGTTTGACCCCTGAAGTAATTAGCGGGTACTGTTGATTCTGTTGTTATTTATTTGACTTTTACAGTTTACTTTAGTCACATTAATGTGTATGTTTGGTTCA
Gma.6862.1.S1_x_at	AJ319868.1	At1g48620	7e-32	Unclassified - Protein with Unknown Function			TGAAGGAGTCTCTTGGCACGCTTAAGCCTTATTTTAACCATGAAAGTCCAGTCACTGCAATTGCGGCAATTCAAGAGTTGGAAGTACTGTCAACTTTGGACCTTAAAGCACCATTGAGGGATGAGACCCATCAACAGCCACAGCCACAGCCACAGGTGTATGAACAGCAATATCCCCAGCCACAGCCACTGCTGCAGCAATTTTTTCAACCACATACATCAGCCCCAAGCTAGGCCTGAACTTGATGAAGGACAACTTGTACAAGTGTTTTTAACAAGACACAAGAGATAAAAGATCTGTAAAGCGGTTAGGAAGTAGTGGTACTGATTTTTCTGAGGGTGAAGTGACTCTGTCTATTTTAGTTTGTTGTTGTGCAACATTTAGTTTGACCCCTGAAGT…
Gma.14272.1.S1_at	AW164547	At3g05890	4e-13	Unclassified - Protein with Unknown Function			GTTCGAATTCGAATTGTTCCATTTGCTTCGCAAAAGTTGCAACTACTTCCACAGAAAGAAAAAAAGTTTCTAAGTTAAGGAAATCCAGAGTGAAAAAAAAAAAATGGCCGGTGACGGTGCAGCTACATGCATAGACATCCTTCTTGCCATTATTCTCCCTCCTCTTGGTGTCTTTCTCAAATATGGTTGCCAGGTGGAGTTCTGGATTTGTTTGGTGCTGACCCTTTTTGGTTATATACCTGGAATTATCTATGCTGTCTATTCTATCACCAAGTGATCGTCACCCTTTAACTTTTGTGGACAATAAACAAATGTCATGGGCGTTTCTGTCTTTCAACTCAGATATTACTGTTTCTTCAATCTATCGTTGTCAATGTTGCCATT
Gma.6299.1.S1_at	BQ080139	At3g05890	3e-14	Unclassified - Protein with Unknown Function			TTTTTGAACCACAAAATGGCCGACGACAGCACAGCTACCTGCATCGACATCCTCCTTGCCATCATCCTCCCTCCTCTCGGTGTCTTCCTCAAGTATGGATGCAAGGTAGAGTTCTGGATCTGTTTGGTGCTTACTCTTTTTGGTTACATTCCTGGAATTATCTATGCTGTCTATGCTATCACCAAGTGATCATATTCATCACCTCTTGTAGACAATGAATAATTTGTCAAAGTACAACGGTTATGCATGTTTCTCAACTCCAGCATTGATATAATCGTTTGATCTCAGAACAATGTGATTCTTTTTTGTTTTCTGTCTATCAGACTCTATTCGTTTTCAGTTTT
Gma.576.1.S1_at	BM732317	At5g62350	5e-41	Unclassified - Protein with Unknown Function			GTTTTTCTATGATTATATTTTCCTCTCTACTTCTCATTGATCGATTATGGACGAATGCCAATCGAAATT
GmaAffx.93128.1.S1_s_at	CF808853	At4g23800	7e-21	Unclassified - Protein with Unknown Function			GGAGGCTGCCCATTTCATGAAGGAAGAGGAGGAGCAGATGAAACTTCAAAAACAAGAAGCATTGCAACTGCTTAAGAAGAAGGAGAAAACTGAAAATATAATCAAGAAAACAAAACAGAACCGCCAGAAGAAGAAACAGAACAAGGATGACAAGAATTCTGATCCAAACAGGCCTAAGAAGCCTGCATCCTCATTCATCTTATTCAGCAAAGAAGCAAGGAAAACTTTACAGGAGGAGCGACCAGGAATCAGCACCTCAACCCTTAATGCACTTGTTTCATTGAAGTGGAAGGAACTGAGCGAGGAAGATAGACAATTCTGGAATGGCCAAGCATCAAAAGCAATGTGCATACAAGAAGGAATTGGAGGAATACAACAAATCCCTTGCTGCAACTGCAT…
Gma.1397.1.S1_at	CD408242	At4g38580	3e-69	Unclassified - Protein with Unknown Function			GAGGCCTCTAAGGTGGTCGCCCGCATCGCTCACCGCACCGGCAAGAAAGCAGAGCTCTGGCCCTACGTCCCCTACGACGTCGTTGCTCACCCCTACGCACCCGGAGTCTACGACAAGAAAGCCCCCTCCGGTTATGTCCGCAACACCGATGATCCTCACTATTCCCATCTCGCACGTGCCAGCTCCACTGAGGTCCGCTACACCACTGCTTTCAGCGACGAAAACCCCTCCGCCTGTGTCGTTATGTGAAACTATTCTCTTTATTTGTTATCTTCGCTTTCATTCTATCTTGTTTTTCAGATCATG
Gma.15027.1.S1_at	BE329505	At4g33010	2e-40	Unclassified - Protein with Unknown Function			TTAACAACAATGTTCTAAAGTGTGCNCCTCATCCACCANCAGTGCTCATGGGAGATGCATGGACAAAACCATACTCTCGAGAATATGCNGCCTTCCCAGCTTCCTGGCTNCGTGTTTCTAAGTTCTGGCCTTCCACAGGACGTATTGATAATGTGTACGGTGATCGCAACCTCGTTTGCACNCTTCTCCCAACATCACAGGNTGTTGAAGAACAAGCTGCTGCAACGGCCTAATNTTTNCTTCCATTGACAAGTNATTTTCATTTTTNAAATTGTACATAAACTCTTCCTATCATTCAGGCGTTGCTGCT
Gma.15636.2.S1_x_at	BU577532		9e-10	Unclassified - Protein with Unknown Function			GAGAGGGAAGAAGCACCATGCAGTTTATACAGTGAAGAGTGGAACNNNNNTTGTGAAAGCAGTAGTGTTTATTTGGTTTCCCTTTATTATTTTTATTTTGTACTTTATATATTCAAAGTTTTAAGGCACTGTTCAGATCTGATCCATGNCTTGTTACTCCAGTTATATTACTATATA
GmaAffx.80465.1.S1_at	BU548370	At1g56600	3e-70	Unclassified - Protein with Unknown Function			CACGTCCTTTGCTGAGCAGGACTTTCTNAACATGTACTTCAAGGACAAGTACAAGCCAATACCGAACNTGTACAACCTTGTGCTGGCCATGTTGTGGCGTCACCCTGANAATGTTGAACTTGATNAAGTTCAAGTGGTTCATTACTGTGCTGCTGGGTCTAAGCCTTNGAGGTTCACTGGGAAGGAAGAGAACATGGATAGGGAAGATATCAAGATGCTTGTGAAGAAGTGGTGGGACATATATGAAGATGAGACACTGGACTACAATAACAACTCTGTCAACGTGGAACGTTTCACATCGGCACTATTGGATGCTGGGGGCTTTCAGTTTGTGCCAGCACCTTCTGCTGCCTAATATGCTTATTATTTACAGCTACAAATTAATGTTAATTAACGACA…
Gma.6746.1.A1_at	BI969541	At1g25280	1e-32	Unclassified - Protein with Unknown Function			TGATAAAATCATTCTTCAATTTGGCAAAGTTGGTAAAGACATGTTCACCATGGATTATCGGTACCCTTNNTCTGCATTCCAAGCTTTTGCAATATGCTTGAGCAGCTTTGACACCAAATTGGCTTGTGAATAAAGATAAATCATGAAGCTAAAGGGTNTTAAGTGAGCTAATGAAACAGTTATGATGATGGTATCTTTCCCGTTGTTTATCTTTCTTTTTCTATTTTCATTACCAGTATCATGGGAATAGGCAATTGTTGTTACTCAGCTTCTGTATGATT
GmaAffx.61437.1.A1_at	CD401808	At5g58020	7e-14	Unclassified - Protein with Unknown Function			GGTAATGTTGCTTTGAATGGTAATGGTGGTGGTGGTGGTGCTGCTGCTGCCAAGCGTTTCAAGGCTGTTGATTTGGCCCCGGCGAATGCTACTAAGGATGTGTATGCTTCCATTTTCACTTCCTCGAGGAAGTCTGACTTCAAAGAAACATATAGTTGTAGGTCTCTTCCTCTTGGAAGAAACTGATTCAGGCGTCTCTACTGTTTTATTGTTGTCCAATGTACTGAATTTTAGTTTGTGCCTTTGTGGTTATATAAGTGATTGACTTTTCCTGTGATGGA
Gma.17930.1.S1_x_at	BQ473598	At5g50730	4e-06	Unclassified - Protein with Unknown Function			AAGAGGCAAAGGGTGAAGAAGCCAAAGCAGAGGAACCAACAACACCAACAATTACTGAAGACACCAACAAGGTTGTTCCAGAGGTTAAGATTAATGAATACTTCTATAACCCACCAAGGTATGGCATGGAGGTGTATGCATATCCTGCACACCCTGCACACCCAGCGTATTTCCATTCCTACCCTCCCCAGATTTTCAGCGATGAGAACCCAAATGCCTGCACTGTCATGTAAAAATTGAAGGTGTCAGGGGTGATATGGGAATTAGGGGAAATTGTGAAGTTTGGTGGGGGATATGAATATAGATACCCTTTCCTGTGTTACCTGTACTGTGAA
Gma.17971.2.S1_s_at	AW310947	At5g50730	6e-05	Unclassified - Protein with Unknown Function			ATGGAGTTCTATGCCTCCTACCCTGGACCATCGTACCCGCCTCAGATCTTCAGTGATGAGAACCCCAATGCCTGTTCTGTCATGTAAAAATGGTGGAATGTCAGGGGTAATACTGGAACTTTGGGGGAATTATGGAATTTGAGTGAGTGATTGATTGGCATTGCCTCCTGAGATAGATGTGCCCTACTCCTTCTTCTTCTGTACTTTTCCCCTAATATCAA
Gma.3744.1.S1_at	CD417438	At4g38810	1e-125	Unclassified - Protein With Unknown Function			GTTTACCTCCTGTTGGTGCAATTGAAGAGATGGACAAGGTTATTGGTGAAGTCTTTAAGATGGTGAATGCAGATGATGCGAAGGTGGTGAAAGAAGACGAATTCAAGAAACTATTAACTGAAATACTGGGGAACATAATGTTGCAGTTGGAGGGAAATCCCATATCAGTTTCTTCAAATTCGGTAGTACACGAGCCACTAGACTCNTCTTCTACACTTCTGCAGCCATCCCCTAGTGAAACAGCAGCATAGCTGNGTTGTTTAAGTATATGATGGGTAAAAGAACCGAGCAATATAATAAAATTTTTATTCTATGTAAATTATTACTGGCATAATTTGTGTTTTGAGCTGTCAAATTTAAATGGTGTTGTACTTGAGTCATCGTTCAGGCTGTTTGATC…
Gma.3688.1.S1_at	BI784695	At5g58240	5e-06	Unclassified - Protein with Unknown Function			AAACTTTTCTTATAGCATGTTTGCTAACAGTAGAAAGTGAATTCTGTGTGCATTGTGCGACCAGATTTTCTGAGTGTAGACAATCTTAATGCACTTCCTTGTAGCCACAGAAAAGTTTATTCCGCTGCTTTAGACTTTATAACTTTTAAGTTGCACTGGATCATACAAGTCACACAAATTATAGTCTTCTGGGGAACTTTTTATTATTTATGGTTACATGTAGCATTGTACTAAAGTTTCAAGGAACAATGACAATTTGGTTGAACTAACATCACTTGG
GmaAffx.1991.1.S1_at	AW119827	At5g47120	2e-86	Unclassified - Protein with Unknown Function			GGTTACATTGTAGTAGACACCCAAGAAATAGTTGAGAGGGCACACTTGGGCGATCTGGACTATGTAAAGCATGCCTTGACCTTGTTTACCGATTTGGTNGCAGTTTTTGTCCGGATTCTTGTTATTATGTTGAAGAATTCGNCTGAGAGGAATGAGAAGAAAAAGAAGAGNAGAGATTGATTTTCTTACCAATCTGCTCNNTTAACACTTCANCTCNCTTGGNCTGTAATACNTAAAANCAGCNGTCTATACAGTGTTNTNCACTTNTTAAGCTTGCTCCNNNNACTGTGCAGTTNAGTCGTTTGTTTNCNNNNNNNCANNANNTAGTACATGTTGACATGTTTTGAGCTCTCTAATAAGAGAAATGTTTACATTACATTTGTTTTAAAGATGAAAAGG…
Gma.9995.1.S1_at	CF922008	At1g60710	1e-104	Unclassified - Protein with Unknown Function	Hormone Induced		ATTTTTTGGTGGCAAGGCTGTCGTAGAAAGTATACCTGCAAACAGTTTTCTGGCATTTCAACCAAGGTTACGAGGGGAGAACTTTGACAAGAACAAAATCTTATATTCTAGGATAGAAAAATTGGCAGAGAAGTATGGATGTACATCTTCGCAACTTGCTCTTGCATGGATTCTTCATCAAGGAGACGATGTGGTACCCATCCCTGGAACAACTAAGATAAAAAATCTTGATAGTAATATCGGTTCATGTGAAGTGAAACTCAGCAAAGATGATTTAAAGGAGATTACAGATGCTGTACCAATATCTGAGGTGGCAGGGGATCGGACCACTGATGCATTTGTTAGATGTTCATGGAAGTTTGCTAATACTCCACCAAAAGCATAACTATATATACCAGT…
