# Supplementary material for: Microarray Detection Call Methodology as a Means to Identify and Compare Transcripts Expressed within Syncytial Cells from Soybean (Glycine max) Roots Undergoing Resistant and Susceptible Reactions to the Soybean Cyst Nematode (Heterodera glycines)
Source: Hindawi journal article supplement (doi:10.1155/2010/491217), 2010-01-01
Supplement: f4 [file 491217.f4.xls]

## Sheet: Sheet1
Probe Set ID	Representative Public ID	At Gene ID	At BLAST E-value	Functional Category	Subfamily	Gene Family	Sequence
Gma.7801.1.S1_at	BM307193	At3g48750	1e-134	Cell Growth & Division			TTGGGTACCCCAAATGAAGACACATGGCCTGGNGTAACTTCATTGCCTGATTTNAAATCAACATTTCCCAAATGGCCATCCAAGGACTTNGCAAATGTGGTTCCAAATCTTGATGCAGCTGGTCTTAATCTTCTTTCTAGTATGCTTTGCTTGGATCCCAGCAAAAGAATNACCGCCAGGAGCGCTGTGGAGCATGAATACTTCAAAGACATTAAATTTGTGCCCTGATTCCATATCTTGATGGCAAACGTGTTTATAGTAATATTGTGCAGAATTTATGGGTTTTGACTCTTCGAGAAATGCGTGTTGTCTTTTGCNNCTTTTTTTGTGACTTGGGGGTTGNNNNTGAGNCATANTTCNATTTTTTGGTCCTTANAGAATGTTTCAGATTCAACTTGA…
Gma.12893.1.A1_at	CD394564	At1g20930	1e-79	Cell Growth & Division			GCTATTAGGTACTCCAAATGAAGAGGTGTGGCCAGGGGTGAGTAAACTAAAGGACTGGCATGAATACCCCCAATGGAACCCTAAAAGTCTGTCAACGGCTGTTCCAGGTTTGNANGAGNTTGGACTTGATTTGCTATCCCAAATGTTGNAATATGANCCTTCCAAGAGGATTTCTGCAAAGAAAGCAATGGAACATGCTTACTTCAATGACCTGGACAAGGGGCATCTTTAGAAANACAAATTATTGATCTATGCTTCTCTTGNGCGTGTATCGTTTTAAGACNATAGACTTTTGCTGTTTAACTTTTCATATTTGTGGAATCATGGAGTGATTGATTGCCCTTGGGATTTATGGTCNNNNNNACTTCTGTCTTTTCTAGTCATTCTAATGAG
GmaAffx.81399.1.S1_at	AW568772	At1g55850	1e-48	Cell Growth & Division			GATATCATCTTGAAGTTTTTCGGGTTTTCAGAATCAGCCTTTGTTATATCTGCAAAGGTAGCAGAAGAAAATGTTTCCCAAAGATATGAAAAAGAAGTTATGGAGTTTGGAAACTCATCCCCAATGCTCACTTTACTTGCAACACTTGCATTGCTCAATTTGTTTTGTCTTCTTGGAATGTTACTAAAGCAAGTATTCATAAGTGAAGGGGGTCTCAGAATTTATGAAACAATGGCATTGCAAGTTCTACTAAGTGGAGTTNTGGTTCTTATCAATGTACCTGTGTACCAAGGCCTCTACCTAAGAAAAGACAAGGGAAGATTACCAATATCTGTTGCAGTTAAATCAACAACATTGGCTCTAAGTGCATGTGTCCTCTTTATTGCCATAAGTTAAAAT…
Gma.11314.1.S1_at	BU548544	At5g05170	4e-61	Cell Growth & Division			TGCATCCATTTTCTCACTCTTGTGGGTTAGAATTGATCCATTCACCACAAGGGTCACTGGTCCTGATGTTGAGGAGTGTGGCATTAACTGCTAGAAGACCAAAAGACAAGTGTAGTGTATTGTGTTTTGGGTTGTAATTATAATTGTTGTTTTGTAGCCGTTATGTTTAAGTTATGTGCAGTTGTTTATAGAAGATGCATAAGAAAACAAACTAGAACCGAACTTTGTGGTATTGTTTTATTTGTAATACTAACGTGCCTTCCAGTTTTCTGGAGTAGCTATGTATTATAAGCTATTCGGAGGTTCACATTTTGTATGTATACATCTCAGTGAGTGTTTCCTGTGA
GmaAffx.71589.1.S1_at	BE020161	At5g05170	4e-65	Cell Growth & Division			GAATCTTGATTGTGATCACTACATAAACAACAGTAAAGCCTTGAGGGAAGCTATGTGCTTTATGATGGATCCCAACCTTGGGAAAAATGTTTGCTATGTCCAGTTTCCACAGAGGTTTGATGGTATTGATAGGAATGATCGATATGCCAATCGCAATACTGTTTTCTTTGATATAAACTTGAGAGGTTTGGATGGCATTCAAGGTCCTGTTTATGTGGGTACTGGATGTGTCTTTAATAGAACAGCTTTGTATGGCTACGAACCTCCTATTAAACCCAAGCATAAAAAGCCTGGGTTTCTTTCT
GmaAffx.27899.1.A1_at	BI968454		5e-05	Cell Growth & Division			AGCATGTTGGCAAGGGTGTTTTCATTAATCAAGAGCGAAAGTTGGNNNGTGGAAGGCGATCAGATGCCGTCCTAGTCTCAACCATNNNNGATGCCGTCCAGGGATCAGCGGATGTTGCTTTTAGGGCTCCGCTGGCACCTTATGAGAAATCAAAGTCTTTGGGTTCCGGGGGGAAGTGGTCAAGCCCCTCAAGTGGGAGAAGGCCTAAGGCCATTCATTCCACCGTTCTTTGCTGGTAGTTTTTTGAGCGTTGCCATTACGATATCTATTAT
Gma.4609.1.S1_at	BI968390	At1g18300	8e-46	Cell Growth & Division			GTAATATGCCCTTATGCTTGGATGAAGGAGGCTTTGGATGAATTGGTCAGAAGACAAACTCAACTGCACTCCAAAAAGGATGGGGATATGAGTAGGTTGTAAATTTGTAATAGCGTGTTTGGTTCCACATCACAGATTTGTTTTTTCACGCTTAGTCAGAAACTAATGCTTACAGCTTTTTCACATCCCAAACGTGATTTCTCACTTCTCAAAAAAATTCCAAACATGCACTTAGTGTCTTGCTTTTGGAATCTACAAAGTGGTAGAACAAAAGCACTCATAAGCTGTTGTTAGGGCAAGAGAAATTAAGTCTAGTCATTAAGAGGAGGGAAAGTGCAGTTCAAGGTGTGCCCACAATTTGTTCCTCCCTTGAGTTTGTTTGTTCCTCTCTTCAAATTG…
Gma.2511.1.S1_at	AW395162	At2g47590	4e-60	Cell Growth & Division			AATTGGTTGATGTTTGAGTTGCTATGGAGGGACTTCTTTAGGTTTATAACAAAAAAATACAGTNCTGCAAAGAAACAGCTGGAAGCTGCTCCNGNCACTGCATGTGCTGGNGCATNTGCTTAANCTNGAAGTTCTAGTGGGCATNAANGANGTTTGTTTCAGGGTNTGGGTTGGTTCCCTACGCAGNCATGGCAGTAGGGTGCTNGATGAACAAGATTTGGTTCCCCTTCTGAAGTTCTGTTGTAACTGACAGATACATTATNNTTCAATATGGAAGCTTTACATTATTTTCTCGAANNNAANTGTTGGTATTCTTAGAGTANCATTTCGTCTGCATCGGGCATCTTTTGAGTAGATCTNNGAGTCCAAANTTCATGNCTNTGNCTCTCCCCNCANTAA…
Gma.15151.1.S1_at	BG238739	At5g40770	8e-79	Cell Growth & Division			TGGACTCCACCGTCGGCGAAGGGACCCACTTCCTCATCCCCTGGGTCCAGAAACCCTACATCTTCGACATCCGCACTCGTCCCCACACCTTCTCCTCCGTCTCCGGCACCAAGGACCTCCAGATGGTTAACCTAACCCTCCGCGTCCTCTCCCGCCCCGACACCGAGAAGCTCCCCACCATCGTCCAGAACCTCGGCCTCGAATACGATGAAAAGGTCCTCCCTTCCATCGGCAACGAGGTCCTCAAGGCCGTCGTCGCGCAGTTCAACGCCGATCAGCTGCTCACGGAGCGGTCACAGGTCTCCGCCCTCGTCCGTGACAGCCTCATTCGTCGCGCCAAAGACTTCAACATCGTTCTCGATGACGTCGCGATTACTTCACCTCTCCTACGGCGGGGAA…
GmaAffx.83845.1.S1_at	CA802902	At1g03860	2e-37	Cell Growth & Division			AGGTCACCGAGCCATTGTTTTCAACCGTCTAGTTGGTGTCAAAGACAAGGTCTATCCTGAAGGAACNCACTTNATNATTCCGTGGTTTGAGAGGCCNGTTATCTATGATGTCCGTGCACGACCCCATCTAGTTGAGAGTACATNCTGGNNAGTCGTGNATCTACANGATGGNTGAAAATTGGNNNTNNNGNNCTTACTCGCCCGTTGCCCAACCAATTACCTACGGTTTATCGGACCCTTGGAGAG
GmaAffx.93138.1.S1_s_at	CF808863	At2g32080	2e-70	Cell Growth & Division			AAATGCGCGGTTACTAGTGAGTGACGATTCAGATCTGTTGCGGGATTATCGAAATTGGTTATTGGCGGAGGGAGATGGAGGGGAACTCCGGCGGAGGAGGCGGCGGAAACGACGTGGAATTGCTCTGCAAGACGCTGCAGGTGGAGCACAAGCTCTTCTACTTCGATCTGAAGGAGAACCCTCGCGGCCGCTACCTTAAGATTTCCGAGAAGACCTCCGCCACCAGGTCCACCATCATCGTCCCCTTCTCTGGCATTTCCTGGTTCCTCGATCTCTTCAATTACTACGTCAATTCCGATGATCAGGACCTCTTCAGCAAGGAATTGCAGCTCGACACCAAGGTAGTTTTCTATTTTGACATTGGTGAGAATCGGAGGGGCCGTTTTTTGAAGGTGTCTG…
Gma.6677.1.A1_s_at	AW310551	At5g61210	2e-46	Cell Growth & Division			GGAAGTCTTGGTGGCATGTTCTCCAAAACTTGGAAACCTAAGAAGACAGGCACGATANNTNNNNNNNTTNNTNNTNNAGAGGATCCAGTGAGAAAGAAGGGCAACCACTTGGAGCAAAGAGAGAAGTTAGGATTGACTTCTGCCCCTAAAGGGCAGTCAAAGTCACGTACAACACTTTCTGAGCCATCAAATGTGCTTGAAAAAGTTGAGGTTGAAAAAGGGAAGCAAGATGATGCACTGTCAGATTTAAGTGATCTCTTGGGAGAACTGAAAGGCATGGCCATTGACATGGGATCTGAAATTGGGAGCCAAAACCAAGCCTTGGATGGTTTTGACAATGATATGGAGAAGTTGATCGTCCGCGTGAATGGTGCTAATCAACGTNGTCNTCGTTTGCTT…
Gma.9956.1.S1_at	AI938045	At5g06860	9e-95	Cell Structure			GCCGGCTATTATGCTCTCTAAAAACCAGCTTTCAGGGCGCCTTCCTGCTTCTTTGGCCAACTTAGACTCGGACAGGATAGACTTGTCAAGGAACAAGCTCGAAGGCGATGCCTCCATGCTTTTCGGGAGCAATAAAAGGACGTGGTCTCTTGACCTTTCAAGGAACAATTTCGCGTTTGATCTATCTCGCGTGGAGATTCCCCACAAGACCCTGGCAAGGTTGGATCTCAACCACAATAAGATTTATGGGAGCCTTCCTGTGGG
Gma.2464.3.S1_s_at	BQ740648	At3g02230	4e-48	Cell Structure			AGGTAATCTGTGATCACTTGGGATTGGGAATCAAGACTGGTCTGCCCTATATCTATCACAGCAAGGCCAGCAACCCATTTGTGAACTTGAGGAAAGAGTACAAAGGCATATTCTGGCAAGAAGACATTATCCCGTTCTTCCAGAGCATTGTTCTTCCTAAAGAAGCTACCACTGTTCAGAAGTGCTACATTGAGCTTGCCAAGCAAGTCAAGGAAAAGCTTTCCAAGGTAGATCCTTACTTTGACAAGTTGGCAG
GmaAffx.69557.1.S1_at	AW349294		3e-09	Cell Structure			GAACTGTTGTGTTTCAGTGCTTCGTTGATTTCGAACCTCTAGATCCTAACAGACCAGTTGAAAGCTTGGTGCGCCAGGTTGAGAAGATAGTGGGAGAGTATGATTATTATGACTCTAAGATCTTGCTTGGCTACAGCGCCATTAAGGAGGATTGGAATAAAGTTTCACCACCCCTCTTCTTTCTTGCTCTCAATCGCCTAGTGCATTCTTGGCCTAGGGTTAAGGGTGCATCTGTCAAGGTTATTAGTGACACCTATGCCTTCATTCCCCCAACGTGGATCCCTAAACTCCTGTCTTTGGCCGTCTCCGATGCTGGAAAATA
Gma.15523.1.S1_s_at	BE475550	At2g45220	5e-81	Cell Structure			TAAGTCATACCTAGGGAGACCCTGGCAAAAGTACTCAAGAACNGTGTTCATGAAAACCTATCTTGATAGCTTGATCAACCCTGCTGGTTGGATGGAATGGGATGGNAACTTTGCCCTAGACACTTTGTACTATGCTGAATATGCAAACACTGGTCCAGGTTCCAACACTGCCAATAGGGTTACTTGGAAGGGNTACCATGTTCTCACTAGTGCTTCTNAGGCCTCACCTTTCACTGTTGGCAACTTNATTGCTGGTANCAATTGGATACCTAGCTCTGGNGTCCCTTTCACCTCAGGNCTTTGAATATTGCTTGTTGNATTAGAAGTTGGTACACTTTGTGATTAGT
Gma.7198.1.S1_at	BI968104	At5g53370	1e-155	Cell Structure			TATTTGGGCCGTCCATGGAAGCAGTATTCTAGAACCGTATACTTAGTATCCTACATGGGTGACCACATACATCCTCGTGGATGGTTGGAGTGGAATGGAGACTTTGCTTTGAACACATTGTATTATGGTGAGTACATGAATTATGGACCGGGTGCAGCAGTGGGCCAACGGGTTCAATGGCCTGGGTACCGGGTCATTAAGTCTACCATGGAGGCGAATCGATTCACGGTAGCCCAATTTATATCTGGGTCAGCCTGGTTACCATCCACCGGAGTGGCCTTTGCAGCCGGGTTATCTACATGAATTACACCACAAAGTATATAAGAAGGTTTGACATGCTACAAAGTCCAACCAAGCCTACCCAATGGGGGGAAAAAGGGAATGGCTTCTACTTTTATA…
Gma.2475.1.S1_at	BM522941	At1g49750	4e-76	Cell Structure			AAACATGTCCGAACCCGAATTCATTTTACTACGTTCCGTGCAAATCGTACTGGGGGAGGCAGAGCAAGCCCACTAGTCCACCTTCTGAGCCAGTGACTTACAAGACTCTCAAACCACATCGTCTCAGATTGTGATCAGATATCATAGGATAGCTCATATTAGTCCCTTGTGCAGGCGGGACTTTGCCTTTGTGTTGGGTTTCATTTTTTATTTTTCTCACAACAATCCTCTGGTCAGATAGAAACCTCTCCTCTGATGCGTTGATTCAAATCCTGTTCACTGGTTTCATATTANNANNNNNNNNANNNNNNNATGTTTTTCTTTCATGATTAGCTGTTGTTATTTTGTATTTTGTATGCCCCGTGAATAAGCGCTG
GmaAffx.38557.1.S1_at	CD406210	At3g54440	5e-32	Cell Structure			ATGATAGTTGGTCGCCATGTGTCCACGAACAGTATTTGATTCCTCCTGTGCCATACTCATTCTCTGTTAGGCTGTGCCCAGTAAATCCAGCCACTTCTGGTCATGACATCTACAAATCCCAGTTTCAAAACTCTTGATTTCTTGGATCACATGACTTGTTCTATTCAAGAATAAACATCTTGTAGAAGACCGAAGACCGAAGACCAAAGACTGGTGTGCTTACTAAGGACTACAAAGAAACTTGGAAGCTATTGGTGTAAAGATCCCATGCAATCATTTTGGTTGGAAGCTTGATTTAATAATGTGGAAGGTGAATAATCTTATTGTACAAATTTGTTCCATTACCCAAGGAACCAAGCAGACAATTTCACAACTTGTTTAATAAATGTGCTGTAACTG…
Gma.15979.2.S1_at	BE807671	At3g61490	0	Cell Structure			ATTATTGTGCAAGGCATCACCATTTNTGCTCCTGTCACATCTCCNAACACTGATGGCATCAACCCAGATTCTTGCACAAATGTAAGAATTGAAGATTGCTATATAGTTTCTGGGGATGACTGTGTGGCGGTTAAGAGTGGATGGGATGAGTATGGCATAAAATTTGGGTGGCCCACCAAACAGCTAGTGANAAGAAGGCTAACATGCATCTCACCATACAGTGCAACCATTGCCTTGGGAAGTGAGATGTCAGGTGGAATCCAANATGTGAGAGCTGAGGACATCACAGCAATCCAAACAGAATCAGGTGTCAGAATCAAGACAGCAGTAGGGAGAGGAGGGTATGTGAAGGACATNTATGTGAAGAGAATGACCTTGCATACTATGAAATGGGCATTT…
Gma.16400.1.S1_a_at	AI736450	At3g07160	1e-101	Cell Structure			CTCTATGATGCTGGTATGGGAATGCTCATCTTTGTACCCATTGCCTTC
Gma.16400.2.S1_s_at	BM523380	At3g07160	2e-17	Cell Structure			GTACCCATTGCCTTCTTTTCGTGGTTCCCATTTGTATCAACATTCCAAACTCGCCTAATGTTTAACCAGGCTTTTAGCCGAGG
Gma.390.1.S1_at	BE330506	At1g14900	8e-17	Cell Structure	Histone		GACAGTGGAGAGCTTTCTTTCAAACAGAACAATTACATGAAAGCTGACCCAAATGCCCCACCAAAGAGGGGCCGTGGAAGGCCACCAAAGCCAAAGNCTCCATTGCCACCAGGCACTGTTGTGTCCCCTCCAAGGCCAAGGGGTCGTCCCCCAAAAGACCCTAATGCCCCTCCTAAGTCTCCCAAGGCTAAGGCCACCCCTGGAAGTGGCAGGCCAAGAGGAAGGCCTAAGAAGGTTCCTCGGTCTCCGGCCGTCGCCGCTCCGACCGCCGTCTCCAGTGGCAGGCCTCGAGGTAGGCCTCCCAAGGTGAAGCCTCAGTTGACAGAAGTCAGTGTTGAGTCATAGAATGACTTCTTTCTTTCTAATTGATGTCAAAAGATGTAGTGTTCTACTCTTGAA…
Gma.9507.1.S1_at	CD405860	At1g06760	9e-14	Cell Structure	Histone		GGTGAAAAACTCCTTTAAGCTCGCACCGACTAAGCCTGCTCCGGTTAAGGCCGCTGCTCCCAAAAAGCCAACCAAAGCTGCCACTAAGCCCGCTTCCAAGCCCAAAGCTGCTACTCCTAAGAAAAAGGCTGTTGCCAAGCCCAAGGCCAAAGCTGCGGCCACGACTGCCAAGCCCAAGTCTAAGCCCGCTAAGGTCGCGGCCAAGAAGGTCGCTGCTAAGCCAGCTAAGAAGAAGACACCCGTAAAGGCCGTGAAGAAGCCCAAGAGTGTCGTGAAGAAACCTAAGAGCGTGAAATCACCAGCGAAGAAGACTAAGGCTAAGGCTAAGAAGTGATGATTTGGATTGGGGTTTGGTTTTGGTTTGGCGTTATAGTTTTATGCATTCCGGGTTCATTCGTA…
Gma.5833.2.S1_x_at	BE801610	At2g18050	2e-25	Cell Structure	Histone		GGTGCTCCCTGCGAATTTCAAGAAGATTCTAGGTCTGCAACTAAAGAACCAAGCTGCGAGAGGGAAACTCGTGAAGATCAAGGCTTCGTACAAGTTAACCGAAGCCGCGAAGAAGGAGAACACCGCCAAAGTGACGAAGGCCAACGCTGAGAAAAAGGAATCGCGTCCAAAACGAAGCAAAACCGCAACCGCCGCTGCTCCGAAGAAAACCGAGGCGGTTAAAAGGGCAGCGAAGAAGGTAGGGCCGAAGAAGACGAAGAAAGTGTCGACGCCTGCGAAGCCCAAGCAGCCCAAGTCCATTAGGTCTC
GmaAffx.88705.1.S1_x_at	CK606623	At2g18050	2e-24	Cell Structure	Histone		AAAGGAGGATCGAGTCCATATGCGATAGCGAAGTACATGGAGGAGAAGCACAAGGCGGTGCTNCCTGCGAATTTCAAGAAGATNCTAGGTCTGCAACTNAAGAACCAAGCTGCGAGAGGGAAACTCGTNAAGATCAAGGCTTCGTACAAGTTANCCGAAGCCGCGAAGAAGGNGAANNNNGNNANAGNNACNNNNGCCAANGCNNNGANNAAGGAATCGCGTCCNAAACGAANCAAAANCGCAACCGCCGNTGCTCCGAAGAAAACCGAGGCGGTTAAAANGNCNGCGAAGAAGGTNGGGCCGAAGAANACGAAGAAAGTGTCGACGCCTGCGAAGCCCAAGCAGCCCANGTCCATTAGGTCTCCNACCAAGAGGGCCCGGAAAGCAGCCGTTGCTGCG…
Gma.4682.1.S1_s_at	AW306683	At1g52740	1e-56	Cell Structure	Histone		AAGAAGAAACCCATCTCGCGTTCTTCTCGTGCCGGCCTTCAGTTCCCAGTTGGTCGTATCCACCGGCTTTTGAAGTCAAGGACAACCGCTAATGGTAGAGTTGGGGCCACAGCTGCTGTCTACTCTGCTGCTATCTTGGAGTATCTCACTGCTGAAGTATTGGAGCTGGCAGGGAATGCTAGCAAGGATCTCAAGGTCAAACGTATTACTCCCCGGCATTTACAACTAGCAATCNCGCNGGGGATGAAGAGTTGGATACCCNTGATAAAAGGAACAATTGCTGGAGGAGGAGTGATTCCTCACAT
Gma.775.2.S1_at	CD404597	At3g54560	6e-52	Cell Structure	Histone		ATCTCGTGCCGGAATCCAGTTTCCTGTGGGACGTATCCATAGGCAGCTGAAACAAAGGGTCCAAGCTAATGGACGTGTTGGTGCCACTGCTGCCGTATACTTAGCCTCAATTCTTGAGTATCTTACTGCTGAAGTTCTTGAACTTGCTGGGAATGCAAGCAAGGATCTGAAGGTGAAAAGGATAACACCAAGGCATTTGCAGCTTGCTATCAGAGGAGATGAGGAGTTGGACACCCTTATTAAAGGGACCATTGCTGGNGGTGGTGTCATTCCTCACATCCACAAGTCCTTGATCAACAAAACAGCCAAGGATTGAGCTCGCTCTTTGGCCTTCTGATTTCATGTTGCTGTTTACTGAGAACTAAGTTTGTGTTTATTGTGAATTGATCACAGTAGTAG…
Gma.5572.1.S1_s_at	CD414878	At1g07790	1e-41	Cell Structure	Histone		TTTAATTGACTTTTCTCCCCTCATAAAAAAAACCTACCAATGGCTCCCGCAAAGGCAGAGAAGAAGCCCGCGGAGAAGAAGCCGGCAGAGAAGGCCCCAGCGGAGAAGAAGCCGAAGGCGGAGAAGAAGATATCGAAGGAAGGAGGAAGCGAGAAGAAGAAGAAGAGAACAAAGAAGAGCGTTGAGACCTACAAGATCTACATCTTCAAGGTGTTGAAGCAAGTGCACCCCGACATCGGGATCTCCAGCAAGGCTATGGGGATCATGAACAGTTTCATAAACGACATCTTCGAGAAGCTCGCCCAGGAGTCATCGCGTCTCGCTAGGTACAACAAGAAGCCCACCATTACTTCCAGGGAGATCCAAACGGCGGTGCGTTTGGTCCTCCCTGGGGAGTTG…
Gma.5909.1.S1_at	AW348400	At5g59970	3e-40	Cell Structure			TACAACCTTTTCAACTCCGAAGGCGAGCCACGATGTCAGGNAAGNAGGAAAGGGAGGCAAGGGTTTGGGAAAGGGAGGAGCGAAGAGGCACCGTAAGGTTCTGAGGGACAACATCCAGGGGATCACCAAGCCTGCGATTCGGCGCTTGGCGAGGCGTGGCGGCGTCAAGCGTATCAGCGGTCTCATCTACGAAGAGACACGTGGCGTTCTCAAGATCTTCCTCGAAAACGTCATTCGCGACGCTGTTACTTACACCGAGCACGCTCGCCGCAAAACCGTCACTGCCATGGACGTTGTTTATGCCCTCAAAAGACAGGGCAGGACCCTTTACGGTTTCGGTGGTTAGTTAGGACATTATGGTAGGCTCTTACTCTTATTAGTATCGAATCATATGTTGCT…
Gma.5187.1.S1_at	BE820534	At4g31880	6e-24	Cell Structure			GGACAAGACTTCGTGTTCATCAAAGTCACAAGGAAGTGGGTACTTATTCTCGCTGTTTATTCCTTACCTGTCTTGTGCTTACAGCATTTAATTTTTTCTTCCTTTCGCCAGAGTGATCAAATGAATTTAGGCCGTGTATCAGGCAGCTGTTCATCATTTGTGGTAATTATCTCGTTGTTGCTGGCATTATTTTCTCCAATTGTTAGTTAGGCTAGTTTAGTTGTAGTATGGGTTAATATCTCTAGTTACTTTTCATTGTTTCTAAACTAGATGAATGTTATTTGAAGGCAACGCCTGAAAATATTTGG
GmaAffx.16018.1.S1_at	BE821618	At5g03170	2e-45	Cell Structure			TACAGTGATAACCAGCTTGCAGTGTATCAGGTAGATAAGGTNCTTCTTCCAATGAAGCTTTTCGGCGCNANGGCACCNGCTGCTTCACCGGCNGAGGCTCCGGCACCGACCAAGCCGGAGAAAAATGTCCGGGCNGGGGCTGCTGATTCTCCTTCNGGGNNGTCGGACACGTCCGCTGATGCTTCGAGTGCAGTGAGTTTGAAAAGGCACACAGTTGAAGGTGTTACCTTTGTTGCTGCAGTTGTTGTCATGATTGTTTCTTGTTTCTGAATGTAAGTCCTAGGATGGCTCATTTTTCTTGGTTTTTTTTTTTATGTTATTCTTTCTTTTTTTTGCTCCAGCGAGTTTGGGTTGATTGATGATGATGGTGGAGATCTCGTGTGCTGTTATTGC
Gma.3604.2.S1_s_at	CF921163	At4g34050	7e-72	Cell Structure			AACTGGGGTTGCCTGTGATTCAAAAGGCCGGAGTGGCTCACAAGATTGACTTCAGAGAAGGACCTGCTCTTCCTCTTCTTGATCAACTCATCAAAGACGAAAAGAATAAGGGAGCGTTCGATTTCATCTATGTGGATGCTGATAAGGACAACTACTTGAACTACCACAAGAGGGTGATTGAGCTTGTGAAGGTTGGGGGACTGGTCGGCTACGACAACACCCTATGGAATGGGTCTGTGGTGGCCCCACCCGATGCGCCTCTCATGGATTATGTTAAGTATTATCGCGATTTTGTGATGGAGCTCAACAAAGCTCTTGCACTTGATTCAAGGGTCGAGATTTGCCAGCTTCCCGTTGGTGATGGGATTACCCTGTGCCGCCGCATCATCTGATCACTCT…
Gma.5785.2.S1_at	BU926461	At1g64390	6e-38	Cell Structure			GGATTCCCTCCTAATTTGGTGGGATTATCCCNNNTNNCAGCNNNTNCCANTCNNCNGNNTTNCNNTNNCCNNNNNCANTNANNACATGGAAAAGCTTATTCGCATGTTCCCTTTGCTNCTTNNNCTTCTTCTGTNCCCCANTTTTGCCTTNGCTGGCCATGACTANGGCCAAGCTCTNAGCAAGAGCCTTCTNTTCTTTGAAGCNCAGAGATCTGGNTACCTTCCCCACAACCAGAGNGTCACATGGAGAGCACATTCTGGTTTGCAAGATGGCAAAGCAAGCGGGGTGGATCTAGTTGGAGGGTACTATGATGCAGGGGACAATGTGAAGTTCGGGTTACCCATGGCGTTTACCGTTACGAT
Gma.4373.1.S1_s_at	BF070388	At2g31200	4e-54	Cell Structure			AAGATGCTCTATGCCACTACTAAAGACAGGTTTAGACGTGAGCTAGATGGTGTCCATTATGAAATNCAGGCTACTGACCCCACAGAAATGGATCTTGAAGTGCTGAGAGACCGTGCACATTGAAATGTTTAAGCACTTAAATTCATTTTCATATCAGAATCTACTAGGTTTTANNNNNNNNCNTTTAATGAATTACCTCTTCATGCTTTGTCATCTGCAGAGCCCATCTTGCCACAGATATATAACTCNTATCCAATAATATGAATCTGAAGGCTGATGGGTTTAAAGCTTTTGGCAGTTATTGTTGTAAATCCCAGTGTGCTGGACTTGTATTGTAT
GmaAffx.90016.1.S1_s_at	CF805741	At5g07270	2e-29	Cell Structure			GTAGCTTCTGTTCCTTCGGAGATACTCTGCCCCGTCACTTGTAGTCCATTTCCATCTATGGCAATTCCCTTATGTACCTGCAATGATGGTCCATGTCCATCATTTGAACCCAGAGAAGTAGAAACACAGGATGGATTACCTCATCACTCTCAAGCATCAACAGTGGATCAGGATAAAATTGAAGGGCCAAGACTAGATAAAACAACCTGCTCTAGCATGTTTTGGGGTAGAAGAAGTTGCAGCAGGGAGCACCAATGCAATTCAGAAATAAATGCTTGACTCGCACCATGCTTGTACGACACATACAAGTGTCGTGGATACTGGGTACACTATAGATCAACAGGATCAGTCCACAATTTTCTTATTAACCAGCCTCAAATAGTGAAACTCGGGATCTCT…
Gma.3594.2.S1_x_at	CD393884	At4g37450	0.005	Cell Structure			TCTCCGGCTCCGAAGCATAAGAAGAAGGGCAAGAAGCACGGTGCTCCGGCTCCTTCACCGTTGTTAGGACCTCCTGCGCCACCCACCGGAGCTCCTGGACCCAGCGAGGATGCTTCTTCCCCTGGACCTGGCACTGCTGCCAACGATGAGAGTGGAGCAGAGACCACCATGTGCTTGGAGAAGGTTCTAGGAGGCCTAGCTTTGGGTTGGGCTACCCTTGTTTTGGTCTTCTAGACAGGCTTTGTTGCTGTTATTAAATTCTTGTATTTGTATCATTTATTTCCTTTTTTTTTCTTTTATCTTTTGAGCCTGTATTGGGTACA
GmaAffx.90508.1.S1_s_at	CF805865	At1g50010	1e-112	Cell Structure			ATCGGGCCCGATGGGCAAATGCCAAGCGACAAGACAGTTGGCGGTGGTGATGATGCTTTCAATACTTTCTTCAGCGAGACTGGTGCTGGAAAGCACGTGCCACGTGCAGTGTTTGTAGATCTTGAGCCCACTGTTATTGATGAGGTGAGAACCGGAACTTACCGCCAGCTTTTCCACCCAGAGCAGCTCATCAGCGGCAAAGAAGATGCCGCCAACAACTTTGCCCGTGGCCATTATACCATTGGGAAAGAGATTGTTGATCTGTGCTTGGACCGCATCAGAAAGCTTGCTGACAATTGCACTGGACTCCAAGGGTTTTTGGTCTTCAATGCCGTTGGTGGAGGAACTGGTTCTGGACTTGGTTCCCTTCTCTTGGAGCGTCTCTCCGTTGATTATGGC…
Gma.5576.1.S1_at	CD417924	At3g10920	4e-92	Disease & Defense			TGTGGCTTGGTCTGGACAAAGAGTTGAAGAGGCTTGTAGTTGAAACCACTGCCAACCAGGACCCACTGGTTACTAAGGGACCAAATTTGGTTCCATTGCTTGGTATTGATGTTTGGGAGCATGCGTACTACTTACAGTACAAGAATGTTAGACCAGACTATCTNAAGAACATTTGGAAAGTTATTAATTGGAAATATGCCAGTGAAGTGTATGAGAAAGAGAGCTCTTAGTCTGAA
GmaAffx.73543.1.S1_at	BM108231	At5g42140	3e-91	Disease & Defense			AGGGCAGATGTACTTCTCCCCAGACCACTGGAATCCAGCGTAGTTTTAGATGTACATCATATAGCATGTGGTGTTAGACATGCTTCTCTAGTCACTAGGCAAGGTGAAGTTTTTACATGGGGCGAAGAATCAGGAGGATGCCTTGGTCATGGTGTTGGGAANAATGTGGTTCAACCTCGTCTAGTTGAAGCATTGACTTCTACAACTGTTGATTTTGTTGCCTGTGGTGAGTTCCATTCCTGTGCTGTTACAATGGCTGGGGAACTATATACATGGGGTGATGGTACCCATAATGCTGGGCTTCTTGGTCATGGCAGTGATGTCAGTCATTGGATACCAAAGAGAATTGCTGGTCCATTAGAGGGACTTCAAATTGCATTTGTTGCTTGTGGTCCATGG…
Gma.6157.1.S1_a_at	BG157500	At1g70850	3e-38	Disease & Defense			TCAGGGGCACAACTAAATCATCAAATTAAGCTCATGTTTTACTCTACTAATGCTATCTAAGAAATAAAAATTGATGTATTATGGGGCTTAATTGACCCTTAATTCCATCAATTTCATATGTTAAAAGCTGAATAAAGTGCATCAGCCACGACTAGGCGTGAGTTGGGCACAAGTGTGTTATGTTGTTCTATTGTGTTTCGTGTGATTGTCGTTGATTGTAACCTG
GmaAffx.56715.1.S1_at	BG041616	At1g70850	4e-40	Disease & Defense			TAATGTGCACATCAAGGCTTCTGCTGATCAGTTCCATAATGTTTTATGCAACAGGACACACCATATTGCCAACATTTTCCCTGGAAAAGTACAGTCTGTTGAAATTCATAAAGGTGAATGGGGCACTGAGGGATCCGTCATCTCCTGGAATTATTTACATGAGGGCAAAGTTTGTGTGGCTAAGGAGATGGTTGAAGGCATAGACATGAAAAACAATAAAATGACCTTTAAGGTCATAGAGGGAGACCTGCTGGGACATTACAAAAGCTTCAAGTTTTTATTGCAAGTTACTCCAAAGGAAAAGGGAAGCGTTGTGAATTGGGTCCTGGAATATGAGAAACAAAATGACAATACTCCTGACCCTTATACCTTATTGGAATTGACAGTTGAGATGAGCAA…
Gma.5682.1.S1_at	AW309358	At5g45870	3e-06	Disease & Defense			AAGGTACTCCCCAATATTGTGAAGGATGTGCAAGTGATTGAAGGTGATGGAGGGGTTGGTACAATCCTCATCTTTAATTTTTTGTCTGATGTGTCCCCAAGTTACCAAAGGGAGAAGATCACAGAGTTTGATGAAATTTCACATGAAATTGGGCTGCAAGTGATTGAAGGAGGTTATCTGAGTCAAGGATTGTCATACTACAAGACAACTTTTCAGTTATCTGCAATAGGAGAGGATAAGACTTTGGTCAACGTGAAAATTTCTTATGACCATGAATCCGAGATAGAAGAAAGGGTCAAACCTACGAAGACATCAGAGTCAACTTTATTATATCTTAGGCGTCTAGAAACATATCTGTCNAATGGCGCTTGAAGAAAAATGTAGTATTTATAAAAATAG…
Gma.10960.1.S1_s_at	BQ453915	At1g20510	0	Disease & Defense			AAGGGATATCAGGTTCCTCCAGCAGAACTAGAGGCCTTGCTACTGACTCATCCTGCTATTTTAGATGCCGCTGTTATCCCGTATCCAGATAAGGAAGCTGGGCAGCATCCAATGGCATACGTGGTGAGGAAGGCTGGAAGTAGCTTATCAGAAACTCAAGTTATGGATTTTGTTGCAGGACAGGTGGCTCCGTACAAGCGGATTCGAAAAGTGGCATTTATTTCCTCCATACCCAAAAATCCATCTGGCAAAATTCTTCGGAAGGATCTCATCAAACTCGCAACGTCTAAACTCTGAATAGATGAGCTTTTTCGTAATATATTTTTTCTATCGGAGTTGGACAAGTGAGGAAATAATCTTTAGCTCCTTTTTTGCTGTAATTTTCTGGCTTGTTTACTT…
Gma.5600.1.S1_at	BU763592	At3g48090	2e-05	Disease & Defense			GGATATTCTACCTCAGGAACTCAAGGACACTTCTTCCTAGCTAGTNTAGTTACTGCTGTGAAAGGATATTCTGTATTAGTCNTTTTTCCACTCAATGAGGAAGCTATAAGCTTCTGATGATGCTTTTGATGTGTATTTGTCATGCAGGTGTAGTGTTGGTTACTTCAGTGTTGTAACTTTGTATTTGTATTCCTAATGTTTTTGATTCCCAAGTTTTGTATTACTTGTGAGAACCAAAAATCATTCAGACTGCTGGACTAAA
Gma.12150.1.S1_at	AB092557.1	At5g50260	1e-143	Disease & Defense			GGAACATGTGATGCATCCAAGGCAAATGACCTAGCTGTATCAATTGATGGCCATGAGAATGTACCTGGTAACGATGAAAATGCATTGCTCAAAGCTGTTGCCAACCAACCTGTTTCTGTAGCCATTGATGCCGGGGGATCTGATTTCCAGTTCTACTCCGAGGGAGTATTTACTGGTGATTGTAGCACGGAGCTAAATCATGGTGTGGCGATTGTGGGGTATGGAGCAACTGTTGATGGGACTAGTTACTGGATAGTGAGGAACTCTTGGGGACCAGAATGGGGAGAACNGGGTTACATCAGAATGCAAAGGAACATATCTAAAAAGGAGGGACTTTGTGGCATAGCTATGTTGGCTTCCTACCCAATCAAAAACTCCTCCAATAATCCAACAGGACCT…
GmaAffx.87604.1.S1_at	AW596527	At5g60360	4e-39	Disease & Defense			TTGTCACTGCTCATTTTCGCGTTCTGCGCCGTCGCCGTCGCCGTCGCCGTCGCGGGCTCCTCCTTCGATGATGCCAACCCTATCCGTTTAGCGTCGGACTTGGAGTCGCAGGTGCTGGACGTGATCGGACAGAGCCGCCACGCTCTCTCCTTCGCCCGCTTCGCTCGCCGCCACGGCAAGCGCTACCGTTCCGTCGACGAGATCCGCAACCGCTTCCGGATCTTCTCTGATAATCTTAAACTCATCAGATCCACCAACAGGAGGTCTCTCACCTACACGCTCGGCGTCAATCATTTTGCTGACTGGACTTGGGAGGAGTTCACCAGACACAAGCTCGGCGCTCCTCAGAATTGCTCTGCCACGCTCAAAGGC
Gma.6075.1.S1_at	AW317183	At3g11660	8e-74	Disease & Defense			GTGTGGTCCCCGTTTGTCTACGGCACTAATGTCCCCGTCGCACCCTACAACTTCGTTGGCCTCAGTCAAGACCAGACCAACGGCAACGTCCTCGTCCTCGTTAAGATTGACGGTAAGGTACGATGGAAAGTTGGTTCCTTCGTCTCTGCTCACTACAACCTCAATGTAAGGTGCCCTGCTTTCATAACCTTTGGCCCCCAAAGCAACGGGATTGCCCTTGGCAATAACGCCGTTAAGTATCAATTGGTTCAACGCTGCACCGTCGGGGTTTGATGTCAACGCCTTCCAAGATATATTGCTCTGCCTCTTGGTATATTTAGTGTCTA
GmaAffx.92192.1.S1_s_at	CF806406	At3g11660	1e-74	Disease & Defense			ATAGTGATCTTCGCCTTCATCGTGTTGCTAACAGTTCTTATAATCTGGGCAATCCTAAAGCCTTCAAAGCCAACCTTCATCCTCCAAGACGTGACCGTCTACGGCTTCAACGCCACCATCCCCAACTTCCTCACCTCAAGCTTTCAGGTCACGCTTTCCTCGCGCAACCCCAACGACAAAATCGGAGTCTACTACGACCGTCTCGACACCTACGTCACTTACCGGAACCAGCAGGTCACGTACCGAACCTCAATCCCACCCTCATACCAAGGTCACAAGGAAGAGGATGTGTGGTCCCCATTCGTCTTCGGCACTAACGTCCCCGTCGCACCCTTCAACTTCGTTGGTCTCAGTCAAGACCAGACCAACGGCAACGTCCTCGTCCTCGTTAAGATTGAC…
Gma.14567.1.S1_at	BE824123	At4g01410	2e-52	Disease & Defense			TCTCCGTCCTCATAAAGAACCCGAACAGGCGTGTCTCCATTTACTACGACAGGTTCTCCGCCTTTGTCTCGTACAGGAACCAGGCCATAACGCCGCAGGTTCTGCTGCCACCCCTGTACCAGGAGAAGCGCAGCTCGGTTTCGGTGTCCCCGGTGATCGGAGGCACGNCGCTNCCGGTGTCGGTGGAGGTNTCNNACGGGNTNGCGATGGACGANGCTTATGGGGTGGTGGGTCTGAGGCTGATATTTCAGGGCAGAGTGCGGTGGAAGGCTGGGGCCATCAAAACTGCGCACTATGGGCTCTACGTTAAGTGCGATGTTTTGATGGGTTTGAAGAAAGGGTTGGTGGGTCAAGTTCCTCTCCTCGGAGTTACACCCTGCGATGTCGATCTATGATTAT…
GmaAffx.92650.1.S1_at	CF808375		4.1e-86	Disease & Defense			GGGAGAACCTCCACATATTGTAGGACATAGGAGGAACGTTCTACTTGGCCTAGGAGGGCTTTGTGGTGCTGTTACTCTTAACAACAACAACCCTTTTGCCTTTGCAGCTCCAATATCTCCTCCTGACCTAAACACGTGCGGTCCACCAGACCTACCCGCAGGTGTAAAACCCACCAATTGTTGCCCCCCATCTTCCAAAATCACAGATTTCAAGTTCTCTCCCTCTAACCAACCCTTGAGGGTAAGACCAGCCGCACATTTGGTCAACGATGAGTATCTAGCCAAATACAAAAAAGCCCTTGACCTCATGAAAAAACTCCCCTCTGATGACCCGCGTAATTTCACCCAACAAGCCAACGTTCATTGTGCTTATTGTGATGGTGCATATCACCAAGTTGG…
Gma.2044.2.S1_at	BE821230		1e-08	Disease & Defense			TGGTGTGTACCCTGACACTACCACTGATGGTGGGTACAGCAAAACAAGTGGTGGTGGGTATGATGATGAGGTTGACTATAAGAAGGAAGAGAAGCACCACAAGCATCTTGAGCACCTTGGTGAGTTAGGTGCTGCATCTGCTGCTGCTTACGCCTTGCATGAGAAGCACAAGGCAGAGAAAGACCCAGAGCATGCTCACAGGCACAAGATAGAAGAGGAGGTTGCAGCAGCAGCTGCAGTGGGATCTGGTGGGTTTGCCTTCCATGAACATCATGAGAAAAAGGAAGCAAAGGAGCAAGATGAGGAAGCTCATGGAAAGAAGCACCACCATCTCTTTGGCTGAAGCATAAGCAACCAATTATGAGCATATTCCTTCTACTTGTCTTATATATATATATA…
GmaAffx.91959.1.S1_s_at	CF807684	At4g14420	4e-33	Disease & Defense			GAAGTTTGATGCCTTTGCACATCAAGTACATTCTAAAGTTGGCTTTCAACTTCCAGATATTGATATGAAATTTTTAGTGGCTGGGGCTATTGCTCTCAAGGGCCTTGGAGGGATTCTTTTCATACTCAGCAGCTCTTTTGGAGCTTTCCTTTTGCTTTTGCATCAAGTGATCACTACTCCAATACTGTATGATTTCTACAATTATCACAGCGAGGACAAAGAATTTATCCAACTTTTCATCAAATTTACTCAGAATATGGCTCTCTTCGGGGCATTGTTGTTTTTCATTGGGATGAAAAACTCTATTCCTAGAAGGCAACCCAAGA
GmaAffx.92831.1.S1_s_at	CF808556	At4g14420	3e-36	Disease & Defense			AACAATGGCGTTCGCTTCTTTCCTCGGCAGAGTTCTCTTCGCTTCCGTCTTCATACTCTCTGCTTACCAAGAATTTAACGAATTTGGAGTTGATGGGGGACCTGCAGCAAAAGCACTCAGACCTAAGTTTGATGCCTTTACACATCGAGTGCATTCTCAAGTTGGCTTTCAACTTCCTGAGATTGATCTGAAATTTTTAATTGCTGGGGCTATTGCTTTGAAGGGCCTTGGAGGGGTTCTTTTCATATTTGGCAGCTCTTTTGGAGCTTTGCTTCTGCTCCTGCACCAGCTGATTGCTACCCCAATCCATTATGATTTTTACAATTATGACAGTGAGGACAAAGAATTTACTCAACTGTTCATCAAATTTACACAGAACATGGCTCTTTTCGGGGCTCT…
Gma.10720.2.S1_x_at	AW396215	At1g77490	1e-137	Disease & Defense			CATCCTTTAAGGTATATGCTGAGAAATATGCTGAAGATCAGGAAGCATTCTTTAAAGATTATGCTGAAGCCCATGCNAAACTTAGCAACCTNGGAGCCAAATTTGATCCTCTAGAGGGCATTGTGATAGATGATTCTCCAAATGCAGGGGGAGAGAAGTTTGTAGCAGCCAAGTACTCCACTGGAAAGGAATANAAACAAGTGTCATGTTTTCTTGTGCCAGTATCTTTTAGTAATACAAGAAGANGCTATTTTCAAATCANGTGATATCNCATGTAAAATNTNGAAGTTTTAAATGAAGAAGAAAGGAATAAANTTCAATAGTGTGCCTATTTGAATTGCAGAGNGANCTGTCTGACNNTATGAAGCAGAAGATACGGGCTGAATATGANGCNATTGG…
Gma.8399.1.S1_a_at	BU546941	At5g14930	3e-73	Disease & Defense			GTGGAATCTATTTTAACTTTTGACTCTTGCTTTTGGGCACATGTTGAAGAAGCTATCCTTTCATGCAAAGTGTTGAAGGATGAACAATCTAGTGTGACAGAGAAGGAAGAGGAAACTGGGAAGTTGCTTGAATTCGAGAAGTATGTTTATGGGTTGCTCACGAAATATGAAGTGTCATCAGAGATTTTCCT
Gma.2530.1.S1_at	AF249913.1	At5g02790	4e-81	Disease & Defense			GATCCTCAGGAGATCGTTGATCTTTTCAAGAAACGCTTCCTGCCTCAACAGTGAACGTTGTATTGCTGCAGGCTTCCTCTAAAATGTAGACTCTGCCCATATAGCGTCCTTTCATTCACGGGATGGGATGCATCTGCAGTCAAATGTCGGTTGTGTTTATCTGCCAGAGTT
Gma.6217.1.S1_at	BQ629904	At1g70890	6e-31	Disease & Defense			AGGAGACGTGCTGGGACATTATAAGAGCTTCAAGTTTATAATGCAAGTTACTCCAAAGGAAAAAGGCAGCGTAGTGCAATGTGTCGTGGAATATGAGAAACAGAAAGATCACATTCCTGACCCTCATACCTTATTGCAATCCACTGTTGAGTTGTGCAAAAAAATTAATGCTTACCTTACTCAGGACAACAACTAAATCAATATCAATANAAAGCTCATGCTCTATGCTATTGCTATCTAAAATAAAAATTGATATCTTATGGGGCATAATTTCCCCTTACTTTCATCAATTATAAATTATATTAAACTCTTAATAAATTGCATTATCTACAATTAGGCATGAGTTGGGCACGTACGTACTTTATGTCGTTGCATTATTTATTTTCCGTGTGAACTTGT…
GmaAffx.89300.1.S1_s_at	CK606380	At1g70890	1e-19	Disease & Defense			TTGCTTCTATATATTACTTGCTTCTTTTCTTGATCATGTCCCTTGCTGGTAAAATCAGCTCTGAAATTGGTGTTCAGGCAACCGCTGCAAAGTGGTTCAACCTCTTCACAACACAACTTCATCACGTTCAAAATCTTACTGATAGAATTCATGGAACCGAGCTGCATCATGGTGAAGACTGGCATCACAATGAGTCGGTCAAGCACTGGACTTATACCATAGATGGCAAGGTTACAACTTGCAAGGAGAGTATTGAATC
GmaAffx.92917.1.S1_s_at	CF808642	At1g05260	9e-93	Disease & Defense			AATCGTTTTGAAATTTGTCCATGACCATATCCACAATGCTCCATCACTAGCAGCTGCATTGATAAGAATGCACTTCCATGACTGTTTTGTAAGGGGATGTGATGCATCAGTCCTTCTGAACTCAACAACCAATCAAGCTGAAAAGAATGCTCCTCCAAATCTCACAGTAAGAGGCTTTGACTTCATTGACAGAATAAAGAGCCTTGTTGAGGCAGAATGCCCTGGTGTGGTCTCTTGTGCTGATATCCTCACTTTGTCTGCCAGAGACACTATTGTAGCCACAGGTGGACCATTTTGGAAAGTTCCAACAGGTCGAAGAGATGGGGTCATCTCTAACTTGACGGAAGCCAGAGATAACATTCCTGCTCCATCTTCTAACTTTACCACCCTACAAACACT…
Gma.10936.1.S1_at	BI700784	At4g37520	1e-116	Disease & Defense			TCTAGGAACACCGTTAATTCCTTTGCTTCCAGTACCAACGTTTTCAAC
GmaAffx.8704.1.A1_at	BG156185	At1g49570	2e-34	Disease & Defense			AACAGCAATCTAGCACCTCTTGATGCTACAAGTACTATGATGTTTGACAATGAGTATTATAGAAATATCGTATACAACACAGCGCTTCTAGAATCTGACCAAGCACTACTTAAGGATCGAAGGACTGCTCCTACGGTTTATTATTACAGCAACAACCGGTTTTCCTTCTACAATGATTTTGCCAAATCCATGGTGAAGCTTAGTAATGTAGGAGTACTTACAGGAGCAGAAGGGCAAATNAGATATAAATGTGGCTCTGNAAACTATTGAGTGCTTGTATTTTTCAGCTTCTTANAAAAACCTCAACAATGTAATTGAGGAAGCCAATAAGTCACTTGGAGTATGAATGCTATCCTTTGTATATTATGTGNAGTGATCATCATCATGGTAGGTGGTGGT…
GmaAffx.8704.2.S1_at	BG042982	At1g49570	3e-67	Disease & Defense			GCTTGACCTCAATTTCTATGATAGATCATGCCCAAATTTGCAAAGGATTGTTGGATATGGTGTTTGGTTAGCCTTAANAAATGACAACAGAATGGCCGCGTCCCTCCTTCGGTTGCACTTTCACGATTGCATAGTAAATGGCTGTGATGCTTCTGTNCTTCTTGATGATACACCATATTTNACGGGCGAAAAGAATGCTCTTCCTAATCNCAATTCACTTNGGGGGTTTGAAGTCATTGATGACATAAAAGAACATCTTGAAAGGATATGTCCATCAACAGTTTCCTGCGCTGATATATTAGCCTTAGCAGCTAGGGAAGCTATTGATCAGATTGGAGGGCCTTCTTGGNAANTNNNNNNNNGNCGAAGAGATGCAACAACAACAAGTAAGGAAGCAGC…
GmaAffx.92230.1.A1_s_at	CF807955	At4g11650	1e-63	Disease & Defense			GGGTTCAACATTCCGATGGACTTCTACCCTCTAAACGGTGGGTGTCACAAAATCAGTTGCAGCGCTGATATCAATGGGCAGTGCCCGGGGCCATTAAGGGCACCTGGGGGATGCAACAACCCCTGCACTGTGTTTAAGACGAATGAGTATTGCTGCACCAATGGGCAAGGAAGCTGTGGGCCCACAAACTACTCAAGGTTCTTCAAGGATAGGTGCCATGATTCTTATAGTTACCCTCAGGATGATCCAACAAGTACTTTTACGTGTCCCGCTGGCTCTAACTACAAGGTCGTCTTCTGTCCATTGGGAGAACCTCATGTTACTCTTCATATGCCTGCTAGTACCGCCCACCAGTAAATAAAT
GmaAffx.3697.1.S1_at	BE820647	At1g78780	7e-83	Disease & Defense			TACCGGGAAGATGGCCCAATTCTATGGCTTGGGAACTGTCAAGGTGGATGACTCTTTGAAGGTTGAAGAGGTGGAGATTTACTATGACCCGGCAGAGCTTCTTGGAGGCCTTCTTTCAGGGAACCACATAAATCACCCAATTGAAGAGGATGGCACCAAAACTTCAGCACCTTCCCAAGGATGTCCCTTCTCCAAATAATTACAATGATGTTTTTAAGTGAATGGTGTCTTGGGATCCAGCTATATTTCTTGAATTAATTAATGTGGCAGCTGAGATNTGAAGGCAAATATAGTATTTGTGTGAAATTGGGTCCATTGAATAAAATTGGAAACATGTCAAAATGAATTATTTTTCCCCCCGCTTTATATGGAAAATTATGGCAAATAAATGTGATGTGT…
GmaAffx.18715.1.S1_at	BI968026	At1g22480	9e-34	Disease & Defense			TGATTCTGTGGTCGTTGCTAGCAATCAACATGGCCCTGCCAACCCTCGCAACCGTCTACACCGTGGGAGATACTTCAGGTTGGGCAATTGGTACTGATTATAGCACTTGGACTGGCGACAAGATCTTTTCAGTGGGTGATAGTCTCGCGTTCAACTATGGAGCTGGGCACACAGTGGATGAAGTTAAAGAGAGCGATTACAAGTCGTGCACCGCAGGGAATTCTATTAGCACAGACAGTAGTGGTGCGACCACAATTGCCCTTAAAAGTGCAGGCACTCATTACTTCATATGTTCTGTTCCTGGACATTGTTCTGGCGGTATGAAACTTGCCGTCACTGTCAAATCAGGAAAAGCCTCTGATGCCACACCCACTACTTCCACTACTACCGCCACTAAAT…
GmaAffx.63822.1.S1_at	BM520838	At1g14700	3e-43	Disease & Defense			AAATTCTCTGACCTCAACATATGGGGCTGCAGCTTGTTTTCATTGGTACCATAGCCCTGTGTTTGGTTGTTTCCTCGGCAGTGCTTGAGCGGTTTGAACAAGCACTTAAACAAGATGGGTCACTTAGCTTCTTGGTCATTGGAGATTGGGGAAGAAAAGGAGCTTACAACCAATCCAAAGTTGCATTCCAGATGGGAGTTATTGGACAACTATTGGACATCGATTTTGTGATTTCCACCGGCGACAATTTTTATGACAGTGGCTTGACAGGCATAGATGATCCAGACTTTGATGACTCATTCACCAAAATCTACACTGCTTCTAGCTTGCAA
GmaAffx.40172.1.S1_at	CA851284	At3g22960	5e-62	Energy			TTGAAATGGCCAACAACCTTGGTGTGGATGCCATCTTTGTGTACACAAAGTATGGACACATGGCATCNCTTCTATCNCGCAACCGCCCNAATCCTCCCATCTTTGCTTTCACNAACGATGACAGTACCCGCATGGCTCTGACTTTGCAATGGGGTGTTGTNCCCATTCTGGTTGATTTGTCCGATGATGCTGAATCNAACATCTCAAAGTCTGTNCAACTTATGAAATCTAGAGGGTTGATCAGCCAAGGAGATGTTGTTCTAGTGGTCTCAGATGTTGCTCCNACACGTGCCNCTCCTATGGCTTTCCAGTCTATTCAGGTGAAGACTATTATCTAAAACNCAAGGNTGCAAAAATATTGAAGNACACGTGTCTGTGTATTTTNTAGGCTTGGGATAG…
GmaAffx.76346.1.A1_at	BQ612378	At4g36750	4e-23	Energy			TAGCTTCTCTGTGGTCAAAGCCACTCAAAATTCTCATTCAATGTTGTGATTTTCAAATGTTGTGTTTATTATTTGTATACGATTATTTAGCATGATCATATTCTTCAACCTTTTTTTTCTCCCTTTCAGAAAAATGTACACATTGTAGACTTCATGTTCGTGATT
GmaAffx.80376.1.S1_at	BQ453220	At5g38420	1e-46	Energy			GAAGTTTGAAACACTGTCCTACCTGCCACCCCTTTCAGATGAATCCATTGCAAAGGAGATTGACTACATGCTCAAGAAGGGATGGATCCCTTGCCTTGAATTTGATGAGTTGGGGTGTGTTCGTAGAGAAAACAGCCATATGCCAGGGTACTATGACGGTAGGTATTGGACATTGTGGAAGCTACCAATGTTTGCTTGCAGTGACTCTTCGCAAGTGCTGAAGGAGATCCATGAATGCAGAAGGGTGTATCCAAATGCATATATACGTTGCTTAGCNTTTGATAACCAGCGTCACATGCAGTCCATGGCTTTTATAGTTCACAAACCTGATATCACTACTACCACTTGAGCCTTTTTGCTCTTGTTAATTTATCTTCATTTCCCCAATTTCTCTCTCTT…
Gma.289.1.S1_s_at	AF303941.1	At5g38410	3e-64	Energy			GATGGACGCTACTGGACCATGTGGAAGCTGCCTATGTTTGG
GmaAffx.18223.1.A1_at	BU551287	AtCg00740	1e-100	Energy			GCTTTATTCTGTCTCCACTTATGAAAGGTCAAGCCGATACAATAGGCATTGCAATGCGAAGAGTTTTACTTTTATAAATAGAGGGAACATGTATCACACGTGTAAAATTAGAAAAAATACCACATGAATATTCTACCATAATAGGTATTGAAGAATCAGTACATGAAATTTTAATGAATTTGAAAGAAATTGTATTGAGAAGTAATCTGTATGGAACTCGGGACGCGTCTATTTGTTTCAAAGGTCNNNGATATGTAACCGCTCAAGACATCATTTTACCACCCTCTGTGGAAATCGTTGATAATACACAACATATAGCCAACGTAACAGAACCCGTTAATTTGTGTATTGAATTAAAAATTGAGAGGAATCGTGGGTATCNTATAAAAACACTAAAAA…
GmaAffx.24893.1.S1_at	CA936513	AtCg00170	8e-67	Energy			GAGGTTCACGATGCATTGCCGTTAGAAATCAAGATATTGGAATTGGACTTATCAATCGATTTAAAACCCTTCAAACCCAACCAATATCTATCCGAACTCCCTTTACCTGTAGGAATACATCTTGGATCTGTNNNTTGTGTTATGGCCAAAGTCCTACTCATGGTCACTTGGTGGAATTAGGAGAAGCTGTAGGTATTATTGCGGGCCAATCCATTGGAGAACCGGGCACTCAACTAACATTAAGAACTTTTCATACTGGCGGAGTCTTCACTGGAGGTACTGCAGAACAGGTGCGAGCACCTTATAATGGAAAAATTCAATTCAATGAAGATTTGGTTCATCCTACACGTACACGTCATGGGCA
Gma.1955.1.S1_a_at	BE191592	At4g05180	2e-73	Energy			AAGCCTAAGGATGAGAAGAAATCACTCAAGGAACTCACTGGCAAGCTCTTCCAGGATATCAGCNATCTGGATCATGCAGCAAAAATTAAGAGCAGCCCAGAAGCAGAGAAGTACTATGCTGCTACTGTATCTTCTCTGAACGATGTCCTTGCCAAACTTGG
GmaAffx.1301.96.A1_s_at	BM093888	At1g20340	3e-22	Energy			TGTCTCAAGGGCTCGTCTCCTACGTCTAAGTTCTCATATGGTTCCTTCTTCTAATATTTTTGTTTTTTCTAGAAGAGCTTGGTTGATCTTTCTTGTTANGGCCTATGGGATGAATGAACGATATAATGCGTTTCTGTAA
Gma.4613.1.A1_a_at	CD418527	At5g64040	4e-59	Energy			AGGAAGGAGAGGTGCCCTTGTTCTCTTGGCAGCTACCCTTTTCATCTCTGCAGCCTCCAATTCTTCTGCCAATGCTGGGATCATTGATGATTACCTTGAGAGGAGCAAGGCTAACAAGGAATTGAATGACAAGAAGAGGTTAGCTACTACTGGAGCAAACTTTGCAAGAGCATACACCGTGGAATTCGGTAGTTGCAAGTTCCCTGAGAACTTCACTGGTTGCCAAGATCT
Gma.2877.1.S1_at	BI969364	At1g53310	0	Energy			GAGACCCTGGGATTGCGGCTCTTTATGACAAACTCCTAGTGTCAGAGGAACTGTGGCCATTTGGCGAGCGATTAAGGTCTATGTTTGAAGAAACCAAGAGCCTTCTCCTCCAGGTTGCTGGACACAAAGATCTCCTTGAAGGAGACCCCTACTTGAAGCAAAGACTTCGACTTCGCGATTCATACATCACAACCCTCAATGTCCTGCAAGCCTACACATTGAAGCGAATTCGTGATCCTGACTACCATGTGAAGTTGAGGCCACATTTGTCCAAAGACTACATGGAATCAAACAAGCCAGCAGCTGAGCTTGTGAAACTCAACCCTACAAGTGATTATGCTCCTGGTCTGGAGGATACCCTTATTTTGACAATGAAGGGTATTGCTGCTGGCATGCAAA…
Gma.2650.2.S1_at	BG882263	At5g20080	1e-09	Energy			TGCCTCTGCGCTCTTGTGGAATCTGTGCAGTGCTTGAACCCTAATAATGGCTGCTTTCTTGAGAAGGTTTGCGAGGGCCACTCCGATCCTATTCGCTGCCCAATCCAAT
GmaAffx.28708.1.S1_s_at	BQ611828	At4g30210	2e-14	Energy			TGAAGATCTCCCCTCTGGATCTCATGTCCGCCATCATCAAGGGCAAGCTCGACCCCTCCAACGTCTCCT
Gma.11223.1.S1_at	BG839304	At3g28715	0	Energy			CCCCTATCAATCTATTTTTGCTAAGCTATCATATGGAGAGAGCCAGATGCTTGACAAGGCATTCTANGAGGAGGAGGTGAAAAGGCTTTGCTTGGCNTTTGAGCAACAGTTTCATTATGCTGTGTTCTTCGCATATATGAGGTTAAGGGAACAGGAGATCAGGAACTTAATGTGGATTTCAGAATGTGTTGCTCAGAATCAGAAGTCCAGAGTTCATGACAGTGTTGTCTTCATATTTTAGTNGGATNGCTCGTTATAGTTTGTNTGTTCGTTGGGACAATTTGTATACTTTCTGCA
Gma.10726.1.S1_at	BU577622	At5g06580	1e-143	Energy	Glycolysis		GTATGTGTTCCTTTATCTCACCTTGGCGATTTAATTTCAAGGTCTAAAAAGGAGCTGGATGCATCACCACTAGTTTGCACAGTAATTGCGCATGCTGGTGATGGTAATTTCCACACGGTTATTTTATTTGATCCTAACCAAGAAGAACAGCGGCGGGAGGCAGAGAGACTCAACCAGTTTATGGTTCATGCTGCCTTGTCATTAGAAGGAACTTGTACCGGTGAACATGGTGTTGGAACTGGAAAAATGAAGTATCTTGAAGAAGAACTCGGAGTGGAAGCATTGAGGACAATGAAAAAAATAAAAGCAGTCCTAGATCCCAACGATATCATGAATCCAGGAAAGCTCATCCCTCCCCATGTTTGTTTCTAGTAGTACCGTCACTCCAAGAAGCAAGTT…
GmaAffx.93110.1.S1_s_at	CF808835	At3g15640	2e-25	Energy			ATAAAAGGATAGTCGGATGCCCAGGAGGTGAAGGTGAGGATGAGCATGATGTTGTCTGGTTTTGGCTGGAGAAAGACAAGCCCCATGAATGTCCAGTGTGCGCACAGTATTTTGTTCTTGAAGTGGTAGGACCTGGTGGACCACCCGATGGACATGGTGATGATGATCACCATTGATTGCATCCTTCAATTAAATCTGGAATAAATTCTGGAAAGA
Gma.15366.2.S1_a_at	CD408609	At1g61520	1e-108	Energy			GCACTGATGGGATTTGCAGAGCACAGAAGATTCCAAGACTGGGCCAAACCAGGCTCTATGGGCAAACAATACTTCCTAGGACTAGAGAAGGGTCTTGGAGGTTCTGGTGAGCCAGCTTATCCAGGAGGACCTTTCTTCAACCCACTAGGCTTTGGTAAGGATGAGAAGTCCTTGAAGGATTTGAAGCTCAAGGAAGTGAAGAATGGAAGGTTGGCTATGTTGGCAATCTTGGGTTACTTTGTTCAAGCTCTTGTCACAGGTGTTGGCCCATACCAAAACCTCCTAGATCATTTGGCTGACCCCGTGCACAACAACATCTTGACCAGTC
GmaAffx.92392.1.S1_s_at	CF808114	At5g47030	2e-63	Energy			CAATTGGCCGCAAAAGAGGTTGATATGGTCATTGTACCAGCAACAACTGGGCAGATGGGTGTTCTCCCAGGACATGTAGCAACAATTGCAGAGTTGAAACCTGGTGTCCTATCTGTACATGAAGGGAACGATGTGACCAAGTACTTTGTCAGCAGTGGCTTTGCATTCATCCATGCAAACTCTGTGGCTGATATAATAGCTGTTGAGGCCGTGCCGGTAGACCGAATTGATGTGAATCTAGTCCAGAAGGGTCTCCAAGAGTTCACTCAGAAACTGAACTCAGCCACAACTGATTTGGAGAAAGCTGAAGCTCAGATTGGGGNTTGATGTCCATAGNGCTCTNAACTCTGCTCTTNCAGGCTAATAATAAGTACTGTAGTGGTAAGTCTTTCCTTCTGT…
GmaAffx.46246.1.A1_s_at	BM253045	AtCg00480	2e-17	Energy			GTACTAACTCCCATTTCTTATTTATTATTGAATTAACCGATCAACTTGCTTTGTTATCGAACATTTCTTTTTGATTTCAAAAATTTTCCGGAAAAAATTTGAATCTATTTTTATATGCGAATCAATCCTACTACTTCTGGTCCTGAGGTTTCTGCGCTTGAAAAAAAAATCTGGGACGTATCGCCCAAATAATTGGTCCGGTACTAGATGTAGCTTTTCCCCCAGGTAAGATGCCTAATATTTACAACGCTCTGATAGTTAAGGGTCGA
GmaAffx.93250.1.S1_at	CF808975	At3g06650	2e-95	Energy			GGGCAGGGAAAGACCTAGTTTCCAGTCTCGTATCAGGTTTGCTAACA
GmaAffx.79438.2.S1_at	AW620369	AtCg00140	5e-23	Energy			GGACTGGTTGTAGCATTAGCACTTTTATTTGCTAATCCTTTTGTTTAATCCTAAAAAAATAGAAATACATATCCTTTTTTTCGGGGACCTTGGCTTTACCCGGCCCTTGCTTTTTCGAATTCTATTTATATTAATATTTCACTCCTATAATTCTTTATCCGTTCGGACAAGAACACAGGGGANNNNNNNATTGAAAGGTGAAGAATTCACATACTGATTCGCCCTCTTTCTTCTCTTTTTTAGTCCAATGACCCCCCCTTTTTTTTAAGATAATTTTTCTCAAGTGTTAAAACTTGAGAGATTTTGCAATGGATATAAGAACTGGTATCTAATTCGAATAAGTATCATTCTTTTAGGGAATCTTCCAATTGATTGACCAATCCAAATAATATATGGATA…
Gma.6351.1.S1_at	AW349648	At5g55070	1e-147	Energy			GATGAGATGGCTGGAGGCACTCTTACAATATCAAATGGTGGTGTTTATGGAAGCCTTTTGAGTACCCCTATTATCAACCCTCCTCAGTCTGCAATCTTGGGTATGCATTCCATAGTGAGCCGTCCAACGGTTGTTGGAGGAAATATTGTCCCAAGACCANTGATGTACGTGGCTCTAACATATGACCACAGAATTATTGATGGAAGAGAGGCNGTGTTCTTTCTGCGACGCATCAAAGATATTGTGGAGGATCCTCGNAGGCTTCTGCTNGACATATGAAGTGAACCTCTAATTTTAAATGGAGTAAATTAAACCTCAAAATTCAAATACCATAATGGGTACCCTTTNGTTTNGNTTTTGAATTGCGGCTGNCCGTAATTTATAATCTGTAATGAGCAA…
GmaAffx.80255.4.S1_at	AW202110	AtCg00500	2e-28	Energy			GGCAGAAATTGTAGTGAAAGCGATAATTCTAGTACTAGTATAATAACTAGTACGAATGATACAAATGATAGTGATTCCACTATAGGAGAAAGTTCTAATAATCTCGATGAAAGTCAAAAATATAAGCATTTGTGGCTTGAATGCGAAAATTGTTATGGATTAAATTATAAAAAATTTTTTAAATCAAAAATGAATATTTGTGAATACTGTGGATATCATTTGAAAATGGGCAGTTCAAATAGAATCGAACTTTTGATTGATTCGGGTACTTGGAATCCTATGGATGAAGACATGGTT
Gma.17884.1.S1_s_at	BE023599	At1g11530	2e-32	Energy			ATGCAACCAATAAAGGCTACCCTGTTATGGTTCATTTCTCTGCTTATTGGTGCATGCCTTCAATNGCTATGAATCATTTCTTTCAACAACTGGCCTCCACCTATCAAAATGTTCTCTTTCTGAATGTTGATGTTGATGAGGTCAAGGAAGTTGCTTCCAAGTTGGAAATTAAAGCAATTCCTACCTTTTGTTTGATGAATGGAGGAGCTCCAGTGGATAAAATTGTGGGTGCAAACCCTGATGAATTAAGGAAAAGGATCAATTGTTTTATTCACCAGAAACATTCACCCAAGTCAGTGTGATGATGCTTGAACGAACACATTGAACAGTTGCCGGAGCTGTAAATATGACCCATT
Gma.5430.1.S1_at	BQ079445	At3g08710	2e-51	Energy			GGTCCTTGTAAGGTGATTGCACCACATTATTGCGAGTTGTCCGTGAAATACCCGTCTATCATGTTCTTATTAGTCGATGTGGATGAACTAGCTGACTTCAGCACTTCGTGGGACATCAAAGCCACACCAACTTTCTTCTTTCTTAAAGATGGAAAAGAAGTTGACAAACTTGTAGGAGCCAACAAGCCAGAGCTGGAGAAGAAGATTGTTGTGGTTAATGATGTAGTGCCTCATAAGCAATAGTGATTGTTGTGGTATATCTATTCATAGAAGCTTTGCTCTTCCCTTCTCTCTTCACATGGTAGTGCGTATTCTGCATGTATTCCCGTGA
GmaAffx.93071.1.S1_s_at	CF808796	At5g13420	8e-86	Energy			TGGCACCCCAGAGGCTCTTAATCTACGTGGGAAGGCAGCAGTAGCCCAAGCAGCATTGGCTTACCAGCTCTACCAAAGGAAATTTTCTGGTCCAAGGTGGGAAGCTCTAGTTAAAAAGGGGGCCAAGAAGCAAAGGCTCCTTTGGGCCTCAACCAGTGTAAAGAACCCTGCCTATTCTGACACCTTATATGTTGCTCCTCTTATTGGACCCGACACTGTATCAACCATGCCAGACCAAGCCCTTCAAGCATTTATTGATCATGGTACCGTATCCAGGACAATAGACTCAAATGCATCTGAAGCTGAAGGAATATACAATGCTCTCCAGAAATT
Gma.5057.2.S1_x_at	BE475334	At5g13430	1e-70	Energy			TCCGCTTATGTCTCTCGAAACGCAGTCGTTGATGACCGCAGATCCGATCCTTCCTCCCATCCCCTTTTTCCCTTCAGAGGTTTTGCTACTGAATCCCTGATCCACCCAATAGAAAACAGCATTATTCCTGAGATTCCTGCAACTGTTACTGCTGTTAAGAACCCTACTTCTAAGATTGTCTATGATGAGCACAACCATGAAAGATTTCCCCCAGGTGACCCAAGCAAGAGGGCATTTGCCTACTTCGTCCTTACAGGTGGTAGGTTTGCTTATGCCTCTTTGGTCCGTCTCCTTGTCCTCAAGTTTGTGCTTAGCATGTCTGCCAGTAAGGATGTTCTTGCTCTGGCTTCACTTGAGGTTGATCTCTCCAGCATTGAGCCTGGCACTACAGTGACCGTT…
GmaAffx.89144.1.A1_s_at	CK605580	At2g45140	4e-77	Intracellular Traffic			AAGACTGACAACTATGTGGCTTTCAAGGTNAAGACAACAAATCCTAAGAAATATTGTGTTAGACCTAACACTGGAGTTGTGATGCCTAGGTCTACTTGTGATGTCATAGTNACAATGCAAGCCCAAAAGGAGGCACCTCCTGACATGCAATGCAAGGATAAGTTTCTCCTTCAAAGTGTAGTTGCNAGCCCTGGGGCAACCACAAAAGATATCACTCCAGAAATGTTCAATAAAGAATCTGGTCATGATGTTGAAGAGTGCAAGTTGAGAGTTGTTTATGTTGCTCCTCCTCAACCACCATCCCCAGTTCGAGAAGGATCTGATGAAGANTCATCNCCTCGTGCATCTGTATCTGAGAATGGGCATTCAAGTGCTGCGGAATTTACAGGGGCTTCAAAA…
GmaAffx.47462.1.S1_at	CA800161	At1g76950	2e-68	Intracellular Traffic			ACTGCAGCTGTTGTAGAGGTTATCGCAACACACTCCAGTACAAGCATATCATCAGGTAAATTGTTTACTTGGGGTGATGGAGACAAAAATCGCCTTGGACATGGGGACAAGGAGGCACGCCTTAAACCAACTTGTGTGCCTGCACTTATTGATTACAATTTTCATAAAATTGCTTGTGGGCACAGTTTGACAGCAGGCCTGACAAAATCTGGATGTGTTTTCACTATGGGAAGTACTGTTTATGGTCAGCTTGGGAATCCTCAATCTGACGGAAAGGTTCCATGCTTGGTCGGAGACAAGATTGCCAGGGAATCGATTGAAGAAATTGCTTGTGGAGCATATCATGTAGCTGTATTAA
Gma.3977.2.S1_a_at	AW100324	At3g56190	3e-21	Intracellular Traffic			GATAAAGCCGCCAATTGCTTCAAGCTCGCCAAATCATGGGACAAAGCTGGAGCGACATACCNTGAAGTTGGCAAGTTGTCATTTGAAGTTGGAAAGCAAGCATGAAGCTGCAC
Gma.204.1.S1_at	AB040040.1	At3g09800	1e-66	Intracellular Traffic			GCTCATTCTAGCATCAGTTCTTCAAGGTTTCTTTGATGCAGTCACNCTTCTGTTGAGGAGNAATGTTGACAAAAGAGAGGCACTTGAGAACTTNGATCTCATTCTCNTGTGTCTTGACGAGATTGTTGATGGAGGGATGATACTTGAAACAAATGGACCTCTTATTGCNGAAAANGTGACCTCTCATAGCTTGGATGCTGATGCCCCCTTGTCAGAGCAGACACTAACTCAAGCTTGGGCTACAGCCAGAGAACATTTGACAAGAACCCTTTTAAAATGATGCTTGCATACATTGAAAACGAGCTACCTATTGTTGAATAGTTAAATTTTTGTCTGTTAATGAGAGTTGTTTCATCCCCTAATTTGTGAGTTATTGTAATGAGCACCATATCATTTTTC…
Gma.3839.1.S1_at	CD391787	At1g60780	1e-156	Intracellular Traffic			AGATTTGTGTCTTTGTTTGGTATTCACAAAATAATTGTCTCATTTAACGATCGTGGATGGAAGAGGGAGTCTTTAATCGATTTTTGGCTGACCGCATCAAATTATAAGTTACTCATTGTCTAGAAAGTTGTCAGCTAAATCTAAGCTAGAAACTCTTGCAAGTCCCTTTGGTCAAATCTGTTTTGATAGGAAAAATGATTGGTTCTTCCTCTTCATTCTCAGGCCTTTTTTGTAATCACAATCTGTCCATCTTTTTCTATCGTCTTCAAATTGTAGTCTGATCTTCATTTTACAGAGAATTCTAGGGTTTTGTATAATTGGTCAAATTGTAGTCTGACCAATTATAGATAGGGAAATAATTGTCCCTCAACCATGTATGCACGATA
Gma.2945.1.S1_at	CF922395	At1g47830	3e-67	Intracellular Traffic			GGACTCCGAGAAGCACAAGGTCGAATACGAGGTTCATCGGCTCGTCGTAAACAGAGACCCTAAATACACAAATTTCGTCGAGTTTCGTACGCACAAGATAATATACAGGCGATATGCTGGGTTATTTTTCTCACTCTGTGTTGATATCACTGATAATGAGTTGGCGTATTTAGAGTGCATCCATTTGTTTGTGGAAATATTGGATCACTTCTTCAGCAATGTCTGTGAGCTCGATTTGGTTTTTAACTTCCACAAGGTCTATCTTATACTTGATGAATTCATTCTAGCGGGTGAACTGCAAGAAACAAGCAAGAAGGCTATCATTGAGAGAATGGGGGAACTTGAAAAACTAGAATGAAAAATTACTTTTCAGCAGTCATATCAATTTGGAGATTTCGA…
Gma.8642.1.S1_at	BU763678	At1g62020	7e-93	Intracellular Traffic			TGCTACCCAGTTGAACTATGATTTCCGNAACCCATTTGTAATTTGNGGTGCAACNTACNTGCCAATCTATCGAGGACAGAAGGATGTCTCTTGCCCATATTGTTCTTCACGTTTTGTGCCTANCCAGGAGGGACAACTCTGTAATGTTTGCGATCTTGCAGTGATTGGAGCAGATGCTTCTGGTCTGGTTTGTTNNNNNCTNNNNNNNNNNNCNNCTNNNNNGANNNNNTTGAACTACTGGATCAGGTCCAATGTTAAATTTTGTTTTGGGTCAGTTTTCAGCACTAGNTGAATCCTTNTTAATTAGTCANCATGCTCATGGTACTGTGATANAAGNGAGAGTTAGTCANGAGGAATTANTTTTTCGTCNTTTTGCTTGCCNTTCTCTTTCCTTGAAAA…
Gma.1654.1.S1_s_at	BI971603	At3g15980	1e-119	Intracellular Traffic			GTGGTTCTGATGATTACACTGCCAAGGTATGGGATTATCATTCTAGAAACTGTGTACAGACGCTTGAAGGACATGAAAACAATGTTACAGCAATATGTGCTCATCCTGAGCTTCCTATAATAATAACAGCTTCAGAGGATTCTACTGTTAAAATATGGGATGCTGTCACTTACAGGCTTCAAACCACGTTGAACTTTGGTCTCAAGAGAGTATGGAGTATTGGATACAAGAAAGGATCATCTCAGCTTGCATTTGGTTGTGACCAAGGATTTCTAATTGTTAAGATTTCAGAAGGAAGACCCCAATAAGCCAACATCTGGTAGCCAGATGACTAGTTATGATGAGCTTAACTGCCCAGAGAACATCATATTCTGCCGTTGGTTGTTTATTTCTGAGTTG…
Gma.6427.2.S1_x_at	AW349057	At5g61790	1e-109	Intracellular Traffic			AGATGGTATTGCAGGCTTCCAGAAGAAGGTATTTGACCTCTTGTACAAGATTGCAGACATTCCCTTCCTGAGCGACCACAAATCTAAGATATACGATCTCATTGAGAAAGCTGAGAAACAGCCAAATCTCACTATTGGAATTCTTGTAGCGGTTGTGGTTGTCTTCGTGTCAATTTTCTTCAGGCTCATATTTGGTGGCAAGAAACCTGCAAAGGTGGAGAAGAAACCAGAACGCACAGAAGCTTCCAATAACCAAGGTGGTGCAGAGAATGAAGAAAACAAAGAGAAAGAGGAAGCATCTAATGCTCCGCGTCGGAGGCCAAGGCGAGAAGATTGAAATGGTTGAATCTTTTAAATGGCGCCCTGTCAACTATCATCACCACAGCTACAGATAAATTT…
Gma.6427.3.S1_a_at	AW760945	At5g07340	6e-13	Intracellular Traffic			TTTACCGTTGAGAAAGACAAACTGAAGGCTGAAGAGGAGGCGGCAACGGGTTCAGATGGTATTTCAGGCTTCCAGGTAATAAAAGAATTATGCGGTTTCTCTTTCTCTTTTACTCTCCTTAAGCACCCAAACTATCTTTCTCATGCATAATGTTAATTTCTGACCTTGCAGAAGAAGGTATTTGACCTCTTGTACAAGATTGCAGATATTCCCTTCTTGAGCGAGCACAAATCTAAGATTT
Gma.7901.1.S1_at	BU550953	At4g33650	6e-63	Intracellular Traffic			GGAAGGCCATTCATGTCAGGTTTTTATCCCANGGTNGATGCATGAGCTATNGGNGAATGAGCTCATTGGTGGAAGTAGTTTAACTCAAGGCATTTTATTCATTTGATTACACTGCAACTTCCGGGATTTAGAATTCTGCCTCNCGGAGCTGGACTGCATGAAATTACTCTATCTANCTAAAATGGTGTTGAATGTTGGNCACTGCTTTCTTTNCNTNNGTTCACNTTTTCTTCTCATANAGCATTGNCATTTTTTACAAGGCTCCAGAGAAAGAATAATNGGAGCNGGTGATTGTTCACATTTTTGAGAATCGGNTTTCTATANANTCGTGTATATGACCTTATNNNNTTTTTTNGTTAGTCAGATATTTTTGTCATCAATCGACAATTATGTAGTTCG…
GmaAffx.1301.9.S1_at	BE658084	At5g35200	3e-38	Intracellular Traffic			GTCCAACCAACAGCAAACTTTCATGTTTCAACATCAACAACAACAACAAATGATGATGCCCCCCCAACAACAATCTGTAAATCCTTTTGGAAATCCTTATGGAGCCGCCGCTGTCCATCCCTATGGCTCAGGTATGCCTGTTCAATCATACAATCCATATACAGGTCTCATCTAGGCATTTCCTGTGGAAAACAAATCCTTAATAAGCTCAAGGTAAAAAAGAAANGGNTNNNNNNNTTACTCTNANCTTTCGATTCNGNGATTGGGAAACATNAAGAANGANTAGACTTGTATCATACGTTGTGTGTGTGCCATAGTTAGCTAGAGTGAAATTCTTTTTGAATAATTAGCANNGAGGGNGGGTTTTGATTATATGATTTTTTATGTACAAGGTAAATT…
Gma.6626.1.S1_at	BI469528	At5g59410	6e-54	Intracellular Traffic			GGTTCCATACCTTTGGTTGGAGGCATATGGTTTATCNTCTTTTTAGCGTTATCCACTGGNATTATATATAGTTACTATGCAGTAATNNTAAAGGTTGATGAGGAAGAGTTTGGCGGTCATGGAGCCCTCCTTCAAGAGGGGCTATTTGCTTCTATAACTCTTTTCCTGCTTTCCTGGATTCTAGTTTACAGTTTAGCACACTTCTGATTGGCTGGGCATTGAAGCTTAAACACAGTTGAAAGATTTACTTGATTACATTTGCCCGGATCGCAATCATCTGCTTTACTTCTATGTAAAATGTTCTGATTTTGCAATGCATGCATGAACACTACCTTCTGCATTCCATGGTAATGGCTCTTTTAGTCAAATATTTCTAATGACACCTCGTACTACAGCAAA…
Gma.485.1.S1_at	AW349992	At3g60860	1e-128	Intracellular Traffic			GAATCTTCTCATGGTAGACAGCAACANTGGTTGATTCCCTTAGGCACTGGGAAGAGGAGAGAATTGGCTGCACGTTCACCTCTCATTGTGGCTACTCTGCAGGCTATTTGTAGTTTGGGAGATACTTCTTTTGAGAAGAACTTGTCTCATTTCTTCCCTCTCATNTCTAGCTTGGTACGTTGTGAACATGGGTCAAAGGATGTCCAGGTTGCTCTCAGTGACATGCTTAGTTTATCAGTTGGTCCTATTTTGNTACAGTCATGTNGATGATTTGGGTAAAGATTAACCCTGCATTTTGAGATGTAGGATATTTTTTTGTTTAAATCTTTTTGTTCATAATTTTCTCCTCTCTCTCCTCTGCCTTGNATTACTTGTCAATAATATNCTATGACAGTGTAT…
GmaAffx.21980.1.S1_at	CA802272	At2g16950	1e-31	Intracellular Traffic			GAGCATTGTATCTGTATTGACCTAGTTGGTCATTTTGTGTGTGGTCAAGCAATATTGGAGTCGCGATTCATATTGAGCAGGAGCTGAGTCTCGGTCCAAGTTTTCAGACAGGGTACCAGTACTTAATACAATTCGTTTGAGCTTGATGATTACAGGAAGTTCCACAAGCCTTCAAGATCTCATTTGATGGGAGTTTCCCATGAGAAATGTACAGGGGAATGATTTTCAACCTTTAGAAATGCTTGATTCTTTGTTGTCTTAATAGTTAAAGCCTTAATTAAAGGCTTGGAGTTTTATTCGACCCTTGTGTTCAGCATCACATTTTTCCAATATTTTTAGTTTTNTANGTNGATAGGTTGTATCTTGGTTACACAGTTTTGTTCCACCAGAGAGAGAGA
Gma.16259.1.S1_at	BQ628291	At2g31680	2e-60	Intracellular Traffic			AAACTCATTGCGATACGACGGTGGCAATGATGCTAGTGGGGAACAAATGTGACTTGGAGAATATAAGGGCGGTGAGCNTTGACGANGGGAAAAGCCTTGCGGAAGCGGAAGGNNTTGTTTTTCATGGAAACGTCNGCGTTGGACTCNACAAACGTGAAGANGGCATTTGAGATGGTAATTCGAGAGATATACANCAACGTGAGCAGGAAGGTNCTCAACTCCGAAACATACAAGGCAGAGTTATCTGTCAACAGGGTCAGCCTCGTCAACAATGGTGCTTCTACATCTAAGCAAAATCAACCCTATTTTTCTTGCTGTTCCAGATGACCTACAANNNNCTGCAACTTGCTTTGTCACTTCTATTTCCTTTTTCTTTCTTTTCTTTGCTTTATTAATTAA…
Gma.3652.1.S1_a_at	BI971436	At2g20840	4e-36	Intracellular Traffic			GACTGACAGTGCTCTGAAATTTGGCTGGTTCTTCTTGCTTTACATGTTGCACATTGCCTTTTGCATTTTAGCGGCAGTTGCTCCACCAATTATCTTCAAAGGAAAATCTCTCACAGGCATTTTGGCTGCGATTGACGTGTTGGGCGACAATGCATTGGTTGGGATATTCTACTTCATTGGATTTGGCTTTTTTTGTCTCGAGTCAGTGCTGAGCATCTGGGTTATA
Gma.10915.3.S1_s_at	BG154267	At2g32670	7e-45	Intracellular Traffic			GCAGAAGTCTCTGATCTACGCGTTCGTGTCGCGGGGAACTGTGATTCTCGCGGAGTACACGGAATTCAGCGGAAACTTCAACTCCATCGCCTTCCAGTGCCTTCAGAAGCTCCCTGCCACCAACAACAAGTTCACCTACAACTGCGACGCACACACCTTCAATTACCTCGTCGACAATGGCTACACATATTGTGTTGTTGCAGATGAATCAATTGGAAGACAGTTACCCATGGCTTTTCTAGAGCGTGTCAAAGATGAATTT
GmaAffx.92210.1.S1_s_at	CF807935	At3g22890	5e-39	Metabolism			TCCAAAACCTTCGATACCCATTTCGCCCCATCCCCGAAAGTCAACGTATTTGCGAACTTCCCGGCGAGGAGGCACGTGGGGGTTCGAGTTTCGAACGCGCTGATCGAACCAGACGGAGGGAAGCTGGTGGAGCTTGTGGTGAGGGATAATTCAGAAAGAGACTTGAAGAAGGGTGAGGCTCTTTCGTTGCCGAGGATCAAGCTTTCAAGGATTGACCTGGAGTGGGTCCATGTCCTCAGCGAAGGATGGGCCACACCCCTCAGAGGCTTCATGAGAGAAGCCGAGTTCCTCCAAACGCTTCATTTCAACTCTCTCCGACTCGATGATGGGTCGGTCGTGAAC
Gma.932.1.S1_at	BE823341	At3g01910	4e-48	Metabolism			ATGTGTCTGTTGATGGAGGCAAAACATGGATGGAAGCCTCAAGAATTCAGAAAAGTGGGGTTCCTTATATATCAGAACATGCCAGCAGTGACAAATGGGCATGGGTGCTGTTTGAAGTCACAGCTGATATCCTTCACAGCACTGAGATAATTGCAAAAGCGGTAGATTCTGCTGCAAATGTCCAACCTGAAAAGGTTGAAGACATTTGGAACCTTAGAGGTATTTTAAACACTTCATGGCATCGAGTGAAAGTTCAAGCGAGTTACTCAAACCTGTAAAAGTAGCACCAACTTCCCAATCGAGCCTTTATGACTCTCTCCCCCAACAATGCTTGGTGGATTTTGAAGCTTCTCTGTNTGAACTATGAACACTGAAAACACCTGAACAGGCATCGCAATC…
GmaAffx.90145.1.S1_s_at	CF805870	At5g20830	1e-113	Metabolism			AGCTGATCTATTTGCCATGAACCACACAGATTTCATTATCACCAGTACCTTCCAGGAGATT
Gma.1828.1.S1_at	AF030231.1	At3g43190	0	Metabolism	Sucrose Biosynthesis		ATCTCAAAGGCTGGTCTCCAGCGTATTGAAGAGAAGTACACATGGCAAATTTACTCNCAGAGGCTTCTCACTCTCACNGGTGTCTATGGCTTCTGGAAGCATGTGTCTAACCTTGACCGCCGTGAGAGCCGCCGCTATCTCGAGATGTTCTAT
GmaAffx.93616.1.S1_s_at	CF806916	At3g43190	0	Metabolism	Sucrose Biosynthesis		GGAAACATTGTTGCCTCTTTGTTAGCACATANATTAGGAGTAACTCAGTGTACCATTGCTCATGCTCTAGAAAAGACCAAGTACCCTGAGTCTGACATTTACTGGAAAAAATTTGAAGAGAAATATCATTTCTCATGCCAATTTACTGCTGATCTTTTTGCAATGAACCACACAGACTTTATCATCACCAGCACCTTCCAAGAGATTGCTGGAAGCAAGGACACTGTTGGACAGTATGAGAGTCACACTGCCTTCAC
Gma.3138.1.S1_at	BM885656	At4g05530	7e-75	Metabolism			TCAATTGCAGGTTTTAACCCGCCACCTTCTCTGGCTATNNNNGNNNNGACCAAAACAGCCCTTCTTGGACTTACTAAAGCCCTGGCTGCTGAGATGGCCCCAAACACTCGTGTAAACTGTGTTGCTCCTGGTTTTGTGCCAACCAATTTTGCTTCATTCATTACAAGTAACGATGCTGTGAAGAAAGAACTGGAAGAGAAGACATTACTTGGAAGGCTTGGTACAACAGAAGACATGGGTGCTGCAGCAGCTTTTTTGGCATCTGACGATGCTGCTTATATAACAGGAGAGACCATTGTAGTTGCTGGGGGAACGCCTTCCAGGTTGTAGATTCCACTATCAATCTTCTCTGTTGTGGGCCA
Gma.6550.2.S1_x_at	BM086044	At5g54160	2e-51	Metabolism			GTTCCAATACGGAATCTAAGGCAAAGNNNNNNANNCNNCNTGAANCATGGGTTCAACAGGTGAGACTCAGATTACNCCAACCCANGTATCTGATGAAGANGCAAACCTTTTCGCCATGCAACTAGCCAGTGCNTCNGTNCTNCCNATGNTNCTCAAATCAGCNCTTGAGCTTGATCTGTTGGAAATCATAGCCAAGGCTGGCCCTGGTGTTCANCTTTCCCCCNCNGACATTNCTTCTCNGCTCCCAACACANAACCCTGATGCACCCGTTATGTTGGACCGTATATTGCGCCTNTTGGCTTGCTACAATATCCTCTCTTTTTCT
GmaAffx.91504.1.A1_s_at	CF807229	At5g54160	1e-80	Metabolism			CCTCCTGCAATGAAAATGCTCCTTAAACTATACAAAGGATTTGAGCAAGTATCAACATTGGTTGATGTTGGAGGTGGAGTANGCGAGACCCTAAAACAGATTATCTTTGAGTACCCTTCAATCAAAGGAATTAATTTTGATTTGCCTCAAGTGGTACAAGATGCACCACCCTATCCAGGGATAGAACATGTTGAAGGAGATATGTTTGAAAGTGTTCCAAAGGGTGATGCCATTTTACTAAAGCTTGTATGTCACAATTGGTTAGACGAAGACTGTGTAA
GmaAffx.89694.1.S1_x_at	CK606729	At1g02500	7e-76	Metabolism			TTCCTATTTACCTCAGAGTCGGTGAACGAGGGACACCCTGACAAGCTCTGCGACCAAATCTCCGATGCTGTCCTCGACGCTTGCCTNGANCAGGACCCAGACAGCAANGTTGCCTGCGAAACATGCACCAANACCAACTTGGTCATGGTCTTCGGAGANATCACNACCAAGGCCAACGTTGACTACGAGAAGATNGTGCGTGACACCTGCAGGAACATCGGCTTCGTCTCAAANGATGTGGGACTNGATGCNGACAACTGCAAGGTCCTNGTNAACATTGAGCAGCAGAGCCCTGATATTGCNCAGGGTGTNCACGGCCACCTTACCAAAANAACCNGANGAAATNGGTGCTGGNGACCAGGGTCACATGTTTGGCTATGCCACTGATGAAACCCCTGA…
Gma.406.4.S1_at	BI942914	At4g01850	1e-62	Metabolism			TCCAGCGAGTGTTCTTTCTTCGTTTCAACACCTTAATTTGCACACGCTGCT
Gma.406.5.S1_s_at	BM885775	At4g01850	2e-43	Metabolism			AATGGCACAAGAAACCTTTCTATTCACATCTGAATCTGTAAACGAGGGTCACCCCGACAAGCTGTGCGACCAGATCTCTGATGCAGTACTTGATGCGTGCCTTGAACAGGACCCTGACAGC
Gma.17711.1.S1_at	CD394545	At3g04790	1e-102	Metabolism			GTTCTGCTGGAAGTACAATCTGGATCGGCTTCAGGAGCTTTTCAAGGAAGAAGGTGTGGAAGCAAAATTGAGATTGGAGGAGAGTGGGAAACCCTACGTCACCGATAATTCCAATTACATCGTGGATTTGTACTTCAAGACTCCAATTAGGGATGCATTGGCCGCAGGCGCTGAAATTTCCGCTCTGGAAGGCGTCGTCGAGCATGGCTTGTTCCTCAACATGGCCACTTCTGTCATCATCGCTGGCAAATCTGGCGTTGAAGTCAAGGCCAAGTGAGACTCTGAAGTAATTCGTTTCTTCTTCTTCTTCTCATTCTTGTCTCTGTATTA
GmaAffx.59856.2.S1_s_at	BM091950	At5g17530	1e-18	Metabolism	Sucrose Biosynthesis		ATGAAGGGGTCCGAGTTTCTGGCTATGGTGGATGGTTCCTTCTTAGATTATCACTCCATGATCCTGTACTTCCCCTTAACATTGAGGCACCTAGTAATGACGATGCTGTGAAGCTTGGACTTGCTGTGCTTGCAGCTGTAAAGGACTTCGCAGGTTTAGACACATCAGCCTTGAACAAGTTGGTAGGAGCATCATAATTCGATGCTGTACGCTTCTATTTTTGCATTATACAAAGAGGTTCTCTAT
GmaAffx.18616.1.S1_at	BE021154	At1g32100	1e-100	Metabolism			TTACATCTCCGCAAACCTCTTTGCTGGATACTTTGCTGGCAGCCTCTCTCAGATGGGGTCTTTTGTGCCACCAAGGGACAAGGTGCATCTCTTTGGAGATGGCACACTCAAAGCTATTTTTCTGGATGAAGATGATGTTGCAACATATACAATCAAGGCAATAGATGATCCACGAACCCTTAACAAAACATTGTACCTAAGGCCTCCAGAAAATATTATCTCTCAAGCAGAGCTTATTGGAATTTGGGAGAAACTTATTGGAAAGGAACTAGAGAAGACATACATACCTCCAGAAGGCTTTCTTACAA
GmaAffx.90356.1.S1_s_at	CF806081	At1g32100	3e-77	Metabolism			TGGCACTGGGCCATGAGACCTATGTGGTTCAGAGGCCAGAGTTGAGCCTCCAGATAGAGAAGCTGCAGAGGCTCCTCTCCTTCAAGAAGCAAGGTGCTCATCTCATTGAGGCCTCTTTCAATGATCACAAGAGCCTTGTTGATGCTGTGAAGCAGGTTGATGTTGTCATCAGTGCCATCTCTGGTGTTCACATCAGGAGCCACAGCATCACTCTGCAACTCAAACTTGTTGAGGCCATCAAAGAAGCTGGGAACGTTAAGCGTTTCTTGCCTTCTGAATTTGGCCTAGACCCAGCAAGGATGGGGCATGCATTAGAACCAGGAAGGGTAACATTTGAAGACAAAATGGCTGTAAGGAAAGCAATAGAGGAAGCTAATATCCCTTTCACTTACATCNTCC…
Gma.305.1.S1_at	BM568357	At4g29510	1e-167	Metabolism	Amino Acid Biosynthesis/Metabolism		AGATGGCTCCTGGAGATGCTTCATTCNCAGNACCTTTTAAGCTTGTAGCTGAACGNGACGACTATATTCANGCTCTTGTTGCATATTTTGATGTATCNTTTACAAAGTGTCATAAATTGATGGGNTTCTCTACAGGNCCAAGATCACGAGCTACNCATTGGAAACAAACAGTCCTATACCTNGAAGATGTCTTGACCNTTTGTGAGGGGGAGGCAATTGTGGGGAGCATGNCTGTTGCTCCAAATAAAAAAAATCCTCGGGATGTTGATATAATGCTCAAGTATTCATTGAATGGAAGGCGATGCAATGTTTCAAGGGTTCAGTACTACAAGATGCGTTGAAC
GmaAffx.86184.1.S1_at	CA801713	At1g75330	1e-105	Metabolism			GCTCGTGTTTTGTCTCGCTATAATGACATCATTATGGCTCGTGTTTTTGCTCATAAGGACATACTTGATCTTGCAAAATATGCNACTGTGCCAGTCATCAATGGGTTGACAGACTACAACCATCCCTGCCAGATAATGGCTGATGCCCTTACCATGGTTGAGCACATNGGTCGGTTTGAAGGTACAAAGGTNGTCTANNTTGGAGATGGAAATAATATTGTTCACTCATGGTTGTTGATGGCATCTGTAATTCCNTTTCACTTNGTCTGTGCNTGTCCNAAAGGATTTGAACCNGATGCAAAAACAGTTGAGAAGGCAAGGAAAGCTGGAATCAGCAAGATTGAGATAACNAATGATCCCAAAGANGCTGTTAAAGGAGCTGATGTTGTGTATTCAGAT…
Gma.8238.1.S1_at	AW350572	At5g63620	3e-62	Metabolism			GATATAAATCGGCTTGTTCGCAGAAAGATACAAGTTATTGGCTCCTATGGGGGCAGGGCAAGGCAAGATCTTCCAAAGTTAATTAGACTGGCAGAAACAGGTATCTTCAATCTTGGCCATGCTGTTTCAAGAACATACACTTTTGAGGAGGCNGGAAAAGCATTCCAAGATCTCAATGAAGGAAAAATTGTCGGTCGAGCTGTGATNGAGATAATATAGCTCTATATTCCCAGNAATGCTTTTCTGCAGCAGCAATAGCTATGCTTTTCACACCCCACAAGATATACATGCTTTGGAGTTGCAAGGTGTTGGTACCCTGAGAACANAAATANATAGATGTCNTCTGATGTNTCATTGCAGGGNCATGTTCAAATGAAAACTGTTTTTCTTTTTGTGCAT…
Gma.10764.2.S1_a_at	BI787878	At1g11680	1e-24	Metabolism	Cytochrome P450	CYP51A	TCAGAAGAAGACATGCTGCAGTGCTTCATTGACTCAAAATACAAAGATGGTCGCTCAACAACAGAAGCTGAAGTGACCGGACTCCTCATTGCTGCACTTTTTGCCGGTCAACATACATTTCATTTGGAGGAGGCAGACATGGATGCCTTGGGGAGCCTTTTGCATATCTGCAGNNNNANGCTATATGGACTCATCTGCTTAGGAATTTTGA
Gma.10764.2.S1_x_at	BI787878	At1g11680	1e-24	Metabolism	Cytochrome P450	CYP51A	GCAAGCATCATAACATCTCGCAAGAGTGCCAGCAAATCAGAAGAAGACATGCTGCAGTGCTTCATTGACTCAAAATACAAAGATGGTCGCTCAACAACAGAAGCTGAAGTGACCGGACTCCTCATTGCTGCACTTTTTGCCGGTCAACATACATTTCATTTGGAGGAGGCAGACATGGATGCCTTGGGGAGCCTTTTGCATATCTGCAGNNNNANGCTATATGGACTCATCTGCTTAGGAATTTTGAACTGGAGTTGGTGTCACCTTTCCCCGAGATTGATTGGAATGCCATG
GmaAffx.89867.1.A1_s_at	CK606556	At1g03210	3e-38	Metabolism			GATGCAATAGTTAAATGTCCTGGAAGGGGGTTAATTGTTACGGGGATTGCTCCTCCAGGCTCAGAATTTGACTTCTGTAGTCGATTCTTCTGCCCAAAACTTGGAGTCAATGAGGATCCTGTTTGTGGGGGTGCACATTGTGCATTGGCACCCTACTGGAGCAAGAAGCTAGGGAAGTGTGATTTCAAAGCTTATCAGGCATCAGCCAGAGGGGGAGTTCTCAATGTTCATCTTGATGAGCAGAACCAAAGGGTGCTTTTGCGTGGGAAGGCTGTTAAAGTGATGGAAGGGTGTGTTCTGGTCTAGTCCTGTTCTTAGCATTGCAGATTATATTATTGCATCAAAGTATGTTTCAGATGACTAGAATTGTAACTGAAATTCTGAAGTGTTACGACAC
Gma.3655.1.S1_at	BI469601	At4g02860	5e-95	Metabolism			ACTACTTTCTGAGGCATTGAACGGTGCATCCATAATTGATGTAAAGAGGACACAAATNGGAGATGACTTACTTGTTGAACTCACATCTGTNAAAGCTGTCTCAGAACTACAGCCAAAACTTGATGCAATAGTTAGATGTCCNNGAAGGGGGGTAATTGTTTCAGCGATTGCTCNTCCAGGNTCGGGATTTGACTTCTATAGTCGATTCTTCTGCCCAAAATTGGGNNNCNNTNAGGATCCTGTTTGTGGGAGTGCACATTGTGCATTGGCATCTTATTGGAGCAACAAGCTTGGGAAGTTCGATTTGAATGCTTATCAGGCATCATCCAGAGGGGGAGTTCTCAATATTCATCTTGATGAAAAGATCCAGAGAGTGCTTTTGCGTGGGAAGGCTGTTAC…
GmaAffx.47472.1.S1_at	CA800793	At3g15830	7e-17	Metabolism			GTGCTCAATGTTTTGCAAGCTGTGAGGTTGCTGGGTACAAGAGGCCATTACACNATTGATTTGNCCGTAGGGGTTGGTGCTGGAATTCTCTTTGATTCTTTAGCTGGCAAGTACGNAGATAGCAAAAGGAATGGTGCTCTCAAACACAATTTGATNGCGTGAACAATGTGGATATANGCTNAAAAAATTAACAAACCATCATGGANNNNNNNNNNNNNNGGTGTAAAAGTAAAAGAGTNGAGAGGGCAAGGGTTTGAATCGTAAAAAAAATAAGGTCAANAGAGTGANACATCATATTATTAGGANNTAGGACAAGTCTTAAATCTTAATTACCGCGTAATTNTAAATTTGATTTATTTCACTACTTTTTGTAACCTGTTATTATAGTATAGAGTTTTT…
Gma.10385.1.S1_a_at	CD415146	At5g49810	6e-54	Metabolism	Amino Acid Biosynthesis/Metabolism		AGGACTGTCATTCTCAAAGCCACTGGATTATGCATCAATAGTGGGTCATGGACTGGAATTCCTGGATACTGTCGGTTCAATATTGCACTCGAAGAAAATGATTTCAAAAAAGCATTGGATTGCATTCTAAAATTTAAAGAAGTCGCACTGGGTTAAAACTTCGTGTTTTGATTCCATTCGTTGTATGTCATTCTTTTGATCTTCTGTTTTCACTGTTTTGGGGGTAAGTTTCTTATTCCTCCTATATGCACGGTTCAACAGAAATAATT
GmaAffx.92142.1.S1_at	CF807867	At3g59970	1e-117	Metabolism			CTTGCACTTCGTGGTGATCCGCCTCATGGTCAGGA
Gma.2387.1.S1_at	BI969660	At2g44160	0	Metabolism			TGACATGGGGTGTCTTCCCAGCTAAGGAGATAATTCAACCAACCATTGTNGATCCTGTCAGCTTCAATGTATGGAAGGATGAGGCATTTGAAATTTGGTCAAGAGGATGGGCAAGCTTGTACCCTGAGGNTGANGCATCCAGGAAATTGGTTGAAGAGG
Gma.2387.1.S1_x_at	BI969660	At2g44160	0	Metabolism			GGGTGTCTTCCCAGCTAAGGAGATAATTCAACCAACCATTGTNGATCCTGTCAGCTTCAATGTATGGAAGGATGAGGCATTTGAAATTTGGTCAAGAGGATGGGCAAGCTTGTACCCTGAGGNTGANGCATCCAGGAAATTGGTTGAAGAGGTTGGGGGCAGCNACTTCTTGGTNAGTTTGGTCGACAATGATTACATCAATGGTGATCTTTTNNCCGTCTTTGCAGATTTCTGACATGAGCTTATT
Gma.4408.2.S1_at	CD404738	At1g79750	1e-120	Metabolism			CCCAGCCTACAGAAGCTACCGATGAAAAGTGATAATAATAAATAGGCGCTTTTTTCTTTTTCATTTATCATGATATCATTTCATTGTCAATTTTTTAATTTTTTACCTTCTTTATGTTCCTGTTATGTTTTTTGTAAGTTATTTGTATTGGGTGGGTTAGTAGGTTAGGACGGTGGTGGTAGTGAAGTGGTACTTGGACCAAAAGGTAGCTTGAAAATTTGTGTTTCGCTATAAATGTTGTGAC
GmaAffx.38558.1.S1_at	CD407094	At2g19900	6e-66	Metabolism			ATGATAAACCTCTCATTCTGGCTCTCTCCAATCCTACCTCACAGTCTGAGTGTACAGCTGAAGAGGCTTACCAGTGGAGTGAGGGTCGTGCAATTTTTGCTAGTGGGAGTCCATTTGATCCTGTTGAATACAAGGGCAAAGTTTATGCTTCTGGCCAGGCCAACAATGCTTACATTTTCCCTGGCTTTGGTTTGGGTTTAGTAATCTCAGGAGCAATTCGAGTACATGACGATATGCTTCTAGCAGCTTCGGAATCCTTGGCTAAACAAGTGAGTGAGGAGAACTACAAAAATGGCTTGATTTACCCACCATTCTCTAATATCAGAAGAATTTCGGCTAATATAGCTGCAAATGTTGCTGCCAAGGCATACGAACTGGGCTTGGCTACCCGTCTTCCTC…
GmaAffx.74693.1.S1_at	CD406171	At2g27360	2e-96	Metabolism			AGCTGGCTGTTTGAAATGGTTAAATACGTTCTATGAATACCACAATGAGCTGCTCCAGATTGAAATAAATCGGCTTCGAGTGCTATATCCTCTTACCAATATCATTTATGCAGATTATTTCAACGCTGCATTGGAGTTTTACAATTCTCCAGAACAATTTGGGTTTGGTGGAAATGNTTCTCAANGTTTGTTGTGGAGGTGGGGGTCCTTACAATNACANTGANACGGCCATGTGTGGGGACGCAGGAGTGGTTGCTTGTGATGATCCTTCACAATATGTTAGCTGGGATGGCTATCATTTGACCGAGGCTGCTTATAGATGGATGACCAAAGGTTTATTAGATGGGCCATACACAATTCCTAAATTTAATGTCTCGTGTTTCATAGGTGAAACCATCA…
GmaAffx.66796.2.S1_at	BQ627734	At2g21250	2e-72	Metabolism			GGGTCCTGGACATAGATACCACCATATCCCTGGAAACGACCTGGCATGCAATGGAAGATCTTGTTTCATCGGGCTTGGTTCGCAGCATAGGGATCAGCAACTAT
GmaAffx.2833.2.S1_at	BM139673	At3g23820	0	Metabolism			GTTTGCTGAAAACCAAGGCCAAGAAGCACGTCATTAAGATGCCATCTAACGGCGACGTTCCCTTCACTCACGCCAACGTCAGCTTGGCCTTCAGGGATTTCGCCTACAAACCCACCACCGATCTCTCCACCGGTCTCAGCAAGTTCGTCAAGTGGTACCTCGGTTATTACGGCCTCCAGCCAAGCCTGAAAAAGGATAATCACCTTCACAATATTGAATGACCATTTCTATAATTATCTCTCCTCTATTTTGTTCTTTTTACGGCAAGAAAAAAAAAACAAAAAAACCTTCCCCTTGCTCATGGATCATTTTTCTTGTTTTTGTTGAATCATTATTATTATTATTATTGTTATTGTTGTGGTGGTGTAGCAATTATACATCATATAAATATCTGGTATA…
Gma.5513.1.S1_at	AW310453	At5g02230	1e-111	Metabolism			TCAAGATAGCCAACCTTAATCCACANAGAACTTTGTTCTTTGAGGATAGTGTCCGCAACANACAAGCTGGAAAACGTGTGGGTCTTCACACTGTGCTGGTTGGAAAATCTCAGAGAATTAAAGGAGCAGATTATGCATTAGAAAGCATCCACAACCTTAGGGAGGCAGTGCCAGAACTATGGGAAGATGACATAAA
GmaAffx.52114.1.S1_at	CA852143	At2g26670	3e-13	Metabolism			TCGATTCCTCTGATACTTATTTTGGCAGCAACATACGTGTCAACTTTCACATCATACTGATTCCATAATCAGTTGATTTCCCATTTGCTATTTTTTGCTTGTTTGCCAATTGTCCTTGTTTAATCATTTGCTATTATTGAGTTTCCTTATGCTGAAGGGTTCAATCTATTCATTCGTGACCCCTACTGGGTTACATAGTTTTGTATAATCAG
GmaAffx.19486.1.A1_at	BI971386	At3g20040	3e-10	Metabolism			ATATGCATTGTTTAGGGAGTACTTGCGTGAAGCTCTAAATGAAATATTGGGAGAAGATATTGCCAAGCACGTAATTCTAAAGGTCACCGAAGATGGATCCGGCATTGGGGCTGCACTGCTTGCTGCCTCTTATTCATCCTAAACTGTGGATAGAGGGTACACCTGCTATAAAAATATATATAAATTGTTTGATATTTTATATATATATATATATATATATGTATATATTTATATATATGTACATATATATATATAGGCACACACACACGTATAGCCATGTAAATCAGAATTTATCTCCATATTTAATATCTGTGTAAAGGAAGGTTTCGTCTATTCTTTGACCAAGTTAACATTAATATAATTATAATTTTATTATTTTTTTAACGTTGTGTTTTATGG…
GmaAffx.79423.1.S1_at	BF070096	At3g10850	3e-63	Metabolism			TATTCCTATCTGATCGTAGACGAGAGCACGAAGGAAGCCGCGGCGGTGGACCCGGTCGAACCGGAGAAGGTTCTTGAAGTTGCCAGCTCGCACGGCCTCACTCTCAAATTCGTCCTCACCACCCACCATCACTGGGATCATGCTGGTGGAAACGACAAGATAAAGCAGCTGGTGCCAGGAATCAAAGTCTATGGTGGTTCCATTGAAAACGTCAAGGGTTGCACTGACAAAGTTGAAAACGGTGATAAGGTCTCTCTTGGAGCTGAAATCACTATATTGGCCCTTCACACTCCTTGCCACACACAAGGTCATATAAGTTACTATGTTACTGGCAAAGAGGATGAGCAACCGGCTGTTTTT
GmaAffx.87714.1.S1_at	BQ610524	At1g26810	1e-24	Metabolism			AACTTATCCTCCTTGGGCACATGGTCCCGGTTATGTGGTCTCAGTTGATATCACGAGGACGATGTCCAAGAAATTCAGACATAACCATTTGAAGACGTTGCAATGGGAATCTGGATCGCAGTCNNNNNNNNGGAAGGTCTAGAAGTTTGCTATGAGAATGAGATCAGAGTTTATCTCGAAGGTTGTAAGGATGGTTATGTGGTTTCCCATTACCAAGGTCCCAGGGAGATGCTCTTTTTGTGGCAGAAACTTCTGGTCGATAAACATGCAAAATGTTGTGGTGATAGTAGGAAATGATTGAGGACTGGTCAGGTTACAACTTACAGAAAATAAATAAAAAGAAAAGGCTAGGGAGCTTTGTATAATGATTAGAATAGTTAGCTTGTATAACTCAATTAT…
Gma.11183.2.A1_at	CD394687	At5g48220	1e-106	Metabolism	Amino Acid Biosynthesis/Metabolism	Tryptophan Biosynthesis	GGGAATTTGATCGTGTTCTTGCAATAGAGGGGATTGAGCTTATTGGCATTAACAACCGCAATCTTGAAACATTTGAGTTGGATATCAGCATCACAAAGAANCTTCNTGAAGGAGAGCGAGGCAAAATAATCCNNGAGAGAGGCATAANTATGGTTGGGGAATCTGGTCTCTTTACCCCGGACGATATTGCCTATGTTCAGGAAGCTGGTGTTAAAGCTATATTGGTTGGAGAGTCTATTGTAAAACAAAGTGATCCTGGAAAGGGAATCAGCAATCTCTTTGGCAAAGATATCTCTTTGGGTTGAAGTGAGCTATATTTCTTGAGATATANANGCNTTNGANATGACAGATTTTGCTCAGGTTAATGATTTGATACCTTCGACCTTTGCTTGTACCAAA…
GmaAffx.92014.1.S1_s_at	CF807739	At2g18230	8e-73	Metabolism			GTAGTCTACCCACACAACTATGGTTTTATCCCAAGAACCATTTGTGAAGACAGTGATCCTATGGACGTGCTGGTTCTAATGCAGGAACCCGTGCTTCCTGGTTCCTTCCTTCGTGCTCGTGCTATTGGACTAATGCCTATGATTGACCAGGGTGAGAGGGATGACAAGATCATAGCAGTTTGTGCTGATGACCCTGAGTTCCGCCATTACACAGACATCAAGGAGCTTCCTCCACATCGGCTTGCTGAAATCAGAAGATTCTTTGAGGACTACNAGAAGAATGAGAACAAAATAGTTGATGTTGAAGACTTTCTACCAGCTGAAGCTGCCATTGATGCCATCAAGTACTCCATGGACTTGTATGCTGCTTACATAGTTGAGAGCTTAAGGCACTAACTT…
Gma.898.1.S1_at	AJ010201.1	At1g16350	1e-179	Metabolism	Purine Base Biosynthesis		TCCAGGGAGTTAAGACTGGAGGTCCGGAGTGGAGCAGCACAGGTTGAAGGTGGAGTTCATGGGCTGGTTTCTTATGAAAAGAAATACTTTTGAAGTATGAAACCATCCAAAATCATAAGCGGTGCTATAATCCCTTGCTGCAGTTCAGCATAAAAGAAGGGAACACACTGTTATTGGTTAGTGGCAACTTGTTGCTACTCTGTCAAGCGAATTGAAGTTTATACCAATAGAACATCGTGGGAATTTTCTTCCCTGAGGTTCTGAAGGAAGAACACTGATTTNGTGGTTTTTTTTTGTTTTTTTTCATCTCCATTAGACTTTGTCAAATGTGTCATAGACTTTCCTAAATATAT
GmaAffx.90488.1.S1_s_at	CF806103	At1g16350	9e-97	Metabolism	Purine Base Biosynthesis		GGTCTGGGTCCATTTGTACTACTCAGGAGGTTTGTGCTGTGGGNCGTGGTCAGGCAACTGCTGTTTACAAGGTCTCNTCCATTGCTTATAAAAGTGGTGTTCCTGTGATTGCTGATGGTGGCATCTCNNACTCTGGTCATATTGTTAAGGCTTTGTCATTGGGAGCGTCAACTGTTATGATGGGAAGCTTCTTGGCTGGTAGCCTTGAGGCTCCTGGGGCTTATGTATATCAGAATGGTCAACGTGTCAAAAAGTATAGAGGAATGGGTTCCCTAGAAGCTATGACTAAAGGGAGTGATGCAAGGTACTTGGGTGATACAGCAAAGCTAAAAATTGCTTCAGGGGGTTGTTGGGAGCTGTTAAAGATAAGGGGTTCTGTCTTGAATTTCATACCATACA…
Gma.15564.2.S1_x_at	CD395825	At5g10170	0	Metabolism			AGAACACAATTGTGTTGCACAACACNTGTGAGGATTCACTGTTAGCTGCTCCTATTATCTTGGACTTGGTCCTTCTTGCTGAGCTNAGCACTCGAATCGAGTTTAAAGCTGAAAATGAGGGAAANTTCCACTCATTCCACCCAGTTGCGACCATCCTNAGTTACCTGACCAAGGCCCCTCTGGTTCCACCGNGTACNCCAGTGGTNAATGCNNTGTCAAAGCAGCGAGCTATGCTGGAAAACATCCTNAGGGCTTGTGTTGGATTAGCTCCTGAGAACAACATGATCCTNGAGTACAAGTGAAGTTCAAAGTCTTAAGAGTAANGGTTTGGGATANTGTAGTTGAATGNGATCAAAACTTAACTCATATCCCATACCCNTCTTTTCTGTTATATATTTN…
Gma.1112.1.S1_s_at	CD405359	At1g01470	2e-48	Metabolism			AAAAACTATGTTGCGGAGAAAGTCACNAACATGCCCAAGCCNGAGGCGAGTGTCACCGACGTGGANTTCAAGCGCGTGAGCCGCGACAGCGTCGAGTACTTGGCNAAGGTCTCNGTTNNNAACCCTTATTCCACTNCCATTCCCATTTGTGAGATCAAGTACTCCCTCAAAAGTGCTGGCANGGAGATAGCANTCAGGNACAATACCTGACCCAGGGTCANTGAAGGCAAGTGACACAACAATGNTGGATGTGCCAGTGAAGGTGCCTCATAGCATATTACTGAGCTTGGCAAAGGACATTGGTGCAGATTGGGACATTGATTACCAATTGGAT
Gma.398.1.A1_at	AW350679	At3g22740	7e-29	Metabolism			GCAGAGCATGATTTTGTCTCCTACATAGGCAAGTGGCGTGATGCTGGGGCTTCCCTTTTTGGTGGCTGCTGCAGGACTACTCCTAATACTATAAGAGGCATAGCAGAGGCAACATATGGGAAACTTAAAGACAAATGTATATAACTGTTGAAGTGTGTTTTTATCTGTAATGGAAGAAACTATAATAATCTGAATGAAATGGCTAACTTTTTGCCGGAGGAGCAAGTGA
Gma.4523.1.S1_at	CA799910	At3g23640	2e-46	Metabolism			GAAGCATGAAGTCTTTCCTGATGGTATGGAGCAATTCTTTGAAGGAGACCTCATTCCTAATGGCGAATGGAGGCTGGTTGATAAATGTCTTGGCTTGGCACTGGTGAACCGATTTAGTGTTAGTGAGGTATTCAAGTGTCTTGTTCACTGGGATTGTGGCACTGTCAACCTGGAGCTTTGGTCCCAGAGTAGGCCTGTTTCAGAGCAATCCCCTCTCAGAATTTCCCATCAGTACGAGGTTATAGGAATTTCATAATAATTTAACTGATCATCAATGTATCTAGAATGTTCGAAACAGTGTAGTGCTGTTACAAAACCTGCA
Gma.4108.1.S1_s_at	BI701465	At4g32520	7e-60	Metabolism	Amino Acid Biosynthesis/Metabolism		TGGTGCTCGGGTGGAGAAAATTCTTGACTTGGCTTCTATAACCCTCAACAAAAATTCAGTGCCTGGTGATAAGAGTGCCCTAGTTCCAGGAGGCATTCGCATTGGGGCACCAGCAATGACAACAAGAGGACTTGGTGAGAAAGAATTTTCACTCATTGCTGATTTCATTCATGAGGGTGTGCAAATAAGTCTTGAAGCCAA
Gma.4108.2.S1_at	CA783077	At4g32520	0	Metabolism	Amino Acid Biosynthesis/Metabolism		ATAAGTGGGCTTGTTGCTGCATCTGTACTTTCTAATCCCTTTGAGTATTGTGATATTGTGACCACCACAACCCACAAGTCTTTACGAGGTCCAAGAGGTGGTATGATATTCTTCAAGAAAGATACTGTGCATGGGGTTGATTTGGAGCCTGCCATTAACAATGCTGTTTTTCCTGGTCTACAGGGGGGTCCTCATAACCACACAATTGGAGGACTAGCAGTTTGCTTGAAGTATGCTCAGTCTCCAGAATTTAAAAATTATCAAAATCAGGTGGTTGCTAACTGTAGAGCTCTTGCTAAGCGATTAATTGAGCATGGATATAAACTGGTTTCTGGTGGTAGTGACAA
Gma.2092.2.S1_at	BU551154	At3g17770	1e-140	Metabolism			ATTCCAGCATCGTCGGTTCTTGAAGAGAAATTAAATTCTGGAGATGATCCTTGCACCGCTTTTGTTCTCTCCTCTGAAGCTGCATTGGCTGGAGCTCAGTCAACGGTAGACATGCAAGCACAGGCTGGACGTTCGACTTACATTTCTGGAGAGATTCTTTCGACAATTCCTGATCCTGGTGCTATGGCTGCAGCGACATGGTACAGAGCCGCGGCCTTAGCTGTGAAGGCCAAATACCAGAGCTAAGCCTCATACTTGCAATGTGTCCTCTGTTTTGTGCGGATATAGCCAAGTTTTGTTCCGAATTTTGTACTCTCCTGTAACCATTTAAGGCTCTCCGCTTATGTCTTTTATTCATAAAGCTGTGAGAGCAATTCCCAGTCACTTTCAT
Gma.5458.1.S1_at	AW309669	At1g10670	0	Metabolism			AGCTCTTGTGATAGGAGGAGGCATAGCCAACTTTACTGATGTTGCTGCCACATTTAGTGGTATAATTCGGGCATTGAAGGAGAAGGAGTCGAAATTGAAAGCAGCAAGGATGCACATCTTTGTGAGGAGAGGGGGTCCCAACTACCAGAAGGGTCTAGCTTTGATGCGAGCNCTTGGAGAGGANATTGGCATCCCCATTGAGGTTTATGGACCNGAAGCCACAATGACTGGTATATGCAAAGAGGCAATACAGTTCATTA
Gma.6144.1.S1_at	AW311426	At2g43180	1e-110	Metabolism			AGCGTTGACGAGGTGCAAGGCTTATGGGGATGCTGGGGCCGATGTTCTTTTCATAGACGCACTCGCTTCGGTTCAAGAAATGAAAGCTCTCTGTCAACTTTCTCCCCATCTTCCCAAACTCGCAAATATGCTTGAAGGAGGAGGCAAAACGCCTATACTTAGTCCTCAAGAACTTGAAGACGTTGGTTATAAACTTGCTATTTATCCAATTTCCTTGATTGGGGTTTGCATACGAGCAATGCAGGATGCACTCACTGCTATTAAAGGAGGCGCTGTTCCTCCTCCGGGAAGCATGCCATCTTTTGAAGAAATCAAGGACATCGTAGGTTTCAACTCTTATTATAAAGAAGAGGAGCGTTATGCTACAAGCACCAATCACCAGCCTTAAAAATT
GmaAffx.73273.2.S1_s_at	AW203376	At4g24380	5e-54	Metabolism			AAATCAGCAAATGGGATCCTTCTCTATTCATTCAATTTGATATGGTTTTCCCAGATGGTAAATACCCTGCTGGAGGGAAGTCTGACATAGAAGGCATCTTCCCTCCACCTTACTATGAGTGGTTTCAATTCGAAAAGGACTTCACAGTGT
Gma.13487.1.S1_at	BG045417	At3g14390	1e-128	Metabolism			TGATGCTTACCAGCATATAGAGCTGGTTTCCCCTGCCCCNTCAAATGCTGANACANNAACTTTTGATGTGGTTGGCCCTGTCTGTGAGTCTGCAGATTTCTTAGGAAAAGGAAGAGAACTNCCTACTCCAGCCAAGGGTACTGGTTTGGTTGTTCATGATGCTGGTGCTTATTGCATGAGCATGGCATCAACCTACAATCTNAAGATGCGGCCTCCTGAGTATTGGGTTGAAGATGATGGATCAGTGAGCAAAATAAGNCATGGAGAGACTTTTGAAGANCACATTCGGTTTTTTGAGGGGCTTTGANNNNNTNATTTATNTTGTANGAAAGAAGGNTGGAGAATTNTTNTGTANTTGGAGTTTGAATCTTTCCTNGTCAATGAATGCATGACTCTTAG…
Gma.6439.1.S1_at	BE659084	At3g53580	1e-88	Metabolism	Amino Acid Biosynthesis/Metabolism		AACATCATGAGGTGTTCCCTGCACGAACTAACACAGAGTTTGTNCAAGTNTTNTCTAANTCTCACTTGAAAATGNGTGTNTGGGAGCGGGGAGCAGGAGCAACCCTAGCCTGTGGAACTGGAGCTTGTGCTACTGTTGTTGCAGCAGTTCTTGAGGGTCGTGCTGGGAGGAATTGCACGGTTGATCTACCTGGAGGNCCTCTTCAGATTGANTGGAGGGAGGAAGATAATCATGTTTATATGACAGGCTCAGCCGATGTAGTTTATTACGGATCTTTGCCCCTTTAATATGTTGCCCCCATTGTTAAACCCAATATGGAATTAGGAATTGCTGAATAATATTTGTATGAGAGGTGGACTTTCTGCTTGTTCTTACTATTTTGCCACATNTNNNNANNNN…
Gma.140.1.S1_at	BG154896	At5g57260	2e-87	Metabolism	Cytochrome P450	CYP71B	GATGATGTCGAAAGCCTTCCTTATCTCAAAGCAGTGGTGAAGGAGACATTAAGATTATTCCCACCTTCACCACTACTTTTGCCAAGGGTAACAATGGAAACATGCAACATAGAAGGGTACGAAATTCAAGCCAAAACTATAGTGCATGTTAATGCATGGGCCATAGCAAGGGACCCTGAGAATTGGGAAGAGCCTGAGAAATTTTTCCCCGAAAGGTTCCTTGAGAGTTCGATGGAGTTAAAGGGGAATGATGAGTTTAAGGTGATCCCGTTTGGTTCTGGAAGGAGAATGTGTCCTGCGAAGCACATGGGAATTATGAATGTTGAGCTTTCTCTTGCTAATCTCATTCACACGTTTNNNNNNGAAGTGGCTAAAGGGTTCGACAAGGAAGAAATGTTG…
Gma.5578.3.S1_x_at	AW310572	At2g40890	9e-24	Metabolism	Cytochrome P450	CYP98A	GTTGGACCCCACCTGAAGGAATGAAGCCTGAGGAAATTGACATGGGAGAGAATCCAGGGTTAGTCACATACATGAGGACTCCAATACAAGCTTTGGCTTCTCCTAGGCTCCCCTCACATTTGTACAAACGTGTGCCTGCTGAGATCTAATCTTTCTTTTTCTTTTCCTTGGATTACTCTTTGTTGCATTAAGAAAATTGCCTTGTGTCTATGTAACTACATTTGAAATGGCAATTCAAGGAACTAAGGAAAAACCCATAGCGAGTTTGGCTTCTCCTCTTCA
Gma.5510.2.S1_s_at	AW395005	At3g20950	4e-26	Metabolism	Cytochrome P450	CYP705A	AGAGATTGAGTCAGTGGTAGGCAAAGAAAGGCTGGTCAAAGAATCAGACATTCCCAACCTACCATACCTACAAGCAGTGCTGAAGGAAACCCTAAGGCTGCACCCGCCAACCCCAATATTCGCAAGAGAAGCCATGCGAAC
Gma.7497.1.S1_a_at	CD393659	At3g59760	1e-150	Metabolism	Amino Acid Biosynthesis/Metabolism		GCGAGAAAATGCAACCTGAGCCATGAATTGACTTTGCTTGTTAATGTTTCATACTCATTTTCCACAAGTATCTGTATGGAATGACAGTGTCAGATGTCCATGTTATGCCCGTGTTTCTCATTTTTGACACTCAAGAAATTAGATAACTGTGTA
Gma.7497.1.S1_at	CD393659	At3g59760	1e-150	Metabolism	Amino Acid Biosynthesis/Metabolism		GCAAAGCAATTAGCACTCCAGGAAGGCTTGCTGGTGGGAATTTCTTCAGGAGCTGCAGCTGCAGCTGCTTTGAAGGTTGGAAAGAGGCCTGAGAATGCAGGAAAGCTTATTGGGGTTGTCTTCCCAAGCTTTGGTGAAAGATATTTGTCAACTATTCTTTTCCAGTCAATACGGGAAGAATGCGAGAAAATGCAACCTGAGCCATGAATTGACTTTGCTTGTTAATGTTTCATACTCATTTTCCACAAGTATCTGTATGGAATGACAGTGTCAGATGTCCATGTTATGCCCGTGTTTCTCATTTTTGACACTCAAGAAATTAGATAACTGTGTACAGGTCATTGATTTGACTTACAACACAGATTAATGACCCTTGATTGAAGAAATTTTAGATGTAAT…
GmaAffx.93522.1.S1_s_at	CF807271	At1g15950	2e-78	Metabolism			TTGGTGCCGTCTATATGGACCCCAGTAGGAGCATCGATTTGGTGGTTGACGAGTCCTGTTGGAGTGATTTGGAATATTGCAAGAACACCAAGAATTGGTATTGCTATGGGAAGGCTGTGGCTGAACAAGCAGCATGGGACACAGCAAAAGAGAATGGGGTGGACTTGGTTGTAGTGAACCCAGTTTTGGTTCTTGGACCATTACTGCAGCCCACAATCAATGCTAGTACAATTCACATCCTCAAGTACCTCACTGGCTCTGCTAAGACCTATGCAAATGCCACACAGGCTTATGTGCATGTTAGGGATGTGGC
Gma.2326.1.S1_at	CD402840	At3g27740	1e-109	Metabolism			AACCACAACTATGCTGTTGACCCTGCCACACTGCCGGAAGGAGTGGAGGTTACTCATATCAATCTAAATGATGGAAGTTGTGCTGGTCTTGCTTTCCCNGCTCAACANCTTATGTCTCTTCAATACCANCCTGAAGCATCCCCTGGACCTCATGATTCTGACTANNNTTTTAGGGAGTTTNTAGAGCTAATGAAGCAAGGNAAAAACAGAACAAANGNAAGNCTACACCAACTATCANCAGCACANGCTTTGGATGCATAAGTNGTTGAAGGNAGCTGCTCNNGNNCGTTCGGGGCAAAAAGAATAATGCATCTGCTGAAAAATTACGAAGTTATGAGTCCATTNCTATGATTTTGTAGATGAGTTTATTAAGGTTTTCTAGGGATCTATAAGATTAAG…
Gma.3641.1.S1_at	BI969574	At1g29900	3e-23	Metabolism			GATCGCTCTTCAGGACTTCATTGATGGTGAATTTAAAGAGTGAGAGTTTTTGCAGACAACCACTTACTTTCTGAATTGGTTAGGCGTTAGACACCAGTAAGCACCTGTGTTTTCTCTTTGTATTTGGTACTACTAATTTATGCCCTTTCAAGTCTTTTTGCCTACAAAACCTCCATTCTTTCATCTTTCTATTTGAGATAAATTATTAGATAGTATTTGCGATGTGTTGCATATTTTGAATCGTTTTGGATTGCTCTCCTCCNCTAAGAATATATACGTATTGTTATCANNNANNNNNNNNTATATTGACTGGGCTATTGCTGCTTACCGTGAGATTGCACAAGTTGCTAGATTTGGGAGTGGCGGAAGAATTGCTTTGGGATGCTTTCATTT
Gma.10911.1.S1_at	AW396425	At4g33580	3e-58	Metabolism			AACTTGCTCAGCTATCCTTGGATACAAGATAGAGTGAGAAAAGAGTTGCTTTCTCTACATGGAGGATATTATAATTTCTCTAATTGCTCTTTTGAGAAATGGACCCTTGATTTTAAACAATGCAATGTTGAAGAAGGAAGCAGTTATGTTGTCAAAGAACAAGAATTCTGGTGCTGACTGTTGCTATACCAGGAAGCTTGAAACANNACATTCATGACAATGAAGTCAAATTCAATTTGAGTATACATTATACAACTATATAAATCTTATGTTGATGTTAGTCTCTGCCTGAAAATGAATCAAAGAAATTAAATGATTGATTCTGAATGCAACTTTGTCATGATTTAAGGAAGCTACGGTATAAATTATTGTTTTAGGAAGCAACACAAATCAGAAGAA…
Gma.5218.1.A1_at	CD392232	At1g70410	7e-16	Metabolism			GGGAACCTATTGACATATCGATTTGTGAGAGATGCAGTTGTGAAGAAAACTCTTGCCTTGAAAGGTGCACATTACAATTTCGTTAAGGGCACATTTGAGCTGTGGGATCTGGACTTGAAAATCTCTAACTCTGTATCCGTTTAAGAAAGTGTTCTTAACCCTGCGCTGGTGTGCGTGATGATGTACATGACCTAGCTTCCCTTTGCAAGTGTGTCACAATTGTATAAGACCCCCCCTTCCCCTAGTTGTTTCCCTTAAATCCCAAGAAAAATAAACNAACACTAANNTAAAATAATGGTCTTAGTCTTGTACCAACTCAATGAGTTATGTTTTTGTATCGTTTTCTGTTACATAGTGGTTTTCTTTCGGCAAACTTTAATAGTACTGATCTAGTCATCG…
Gma.7120.2.S1_a_at	BG041285	At3g08860	4e-11	Metabolism			AACTTCGCCCATAAATTCTCTGTTTACGGGGCGAAAATGACAGTATTCTTAGCCACGAGGCTCGTGTTGCGGAGATCCCCGCCGCTTCTCTGGCGGCGCAGCTTTTCTCGGGCGGCGGTAGAGGCCGAAAAGGACACTGTTGCCGTGCCGTCGCTTCCGTTGTTCGATTACTCTCCGCCTCCGTATGCGGGGCCCACCGCTGACGAGATTCTGGCAAANCGCAGGGAGTATCTGAGTCCTTCCATCTTGCACTTCTACAAGAATCCCGTGA
GmaAffx.92608.1.S1_s_at	CF808333	At2g37790	1e-110	Metabolism			TGGCAGCAGCCAAAGCTGCATGCATTCTGTGAATCTAAAGGAGTTCATCTGTCTGGATATTCTCCACTGGGCTCACCAGGAGTTCTCANAAGTGACATTCTTAAGAATCCTGTTGTGATAGAGATTGCAGAGAAATTGGGGAAGACACCGGCACAAGTTGCCCTTAGGTGGGGACTGCAAACAGGTCATAGTGTGCTGCCTAAGAGCACTAATGAGTCCAGAATCAAGGGAAACTTTGATGTGTTTGACTGGTCTATTCCAGAAGAAGTGATGGATAAGTTCTCTGAAAT
Gma.12045.1.S1_at	U77679.1	At3g47340	0	Metabolism	Amino Acid Biosynthesis/Metabolism		GCCCTAGAACCAGCATATAATATTATTATACTAGTCATCATAAAATGAAAATTTTGCTTGCTTTGTAGTTTATCCAGGGAATGGTATATAAATAGATAAGGCTCTCTATCTAGCTGTCTTAAGTGTTGTGCCATCCACATCTTGTCTTTATTTTCTATTTATGTCACCTGAACACTATCATAATG
GmaAffx.79275.1.S1_s_at	CA802684	At5g42650	0.009	Metabolism	Cytochrome P450	CYP74A	TGCTGCTGTGCAGGTTGTTTCTGGTGGAACTCTTTTTGCGTTATGATACGTTTGAGTTTGAGTATACGCAGGCTGGGTTTGGTCCTACTATTACCATTAAGTCCCTCACTAAGGCCTCTACCATCTGAGTTTGGGGTTTATTATCTTCCTTGTGGCAGCGTGGTTTTAGCTT
GmaAffx.89899.1.S1_s_at	CF805624	At5g48230	1e-81	Metabolism			TGCATCGTTGGTGTTGCACGTACACCAATGGGTGGATTTCTTGGTACTCTGTCATCTCTATCTGCCACCAAGCTAGGCTCTATAGCTATTGAAGCTGCTCTTAAAAGGGCCAATGTTGATCCATCCCTTGTGGAAGAAGTATTTTTTGGGAATGTTCTTAGTGCTAATTTGGGGCAAGCTCCTGCAAGACAAGCTGCTCTTGGAGCAGGAATATCCAATTCAGTTATCTGCACTACCGTTAACAAAGTTTGTGCATCAGGAATGAAAGCTGCAATGCTTGCTGCACAGAGTATTCAATTAGGCACAAATGATGTTGTTGTGGCTGGTGGTATGGAAAGCATGTCTAATGTACCCAAGTACCTGGCTGAAGCAAGGAAAGGATCACGCCTTGGACATGATT
Gma.6558.1.S1_s_at	BU084402	At1g36160	8e-58	Metabolism	Fatty Acid Biosynthesis		ACAAATATTGGTGACTCAGCTCTAGATTTGCAAGCTCTACCTCAAGGTCTTGCTGCCCTTTTAAGCAAGTTGGAGCCATNNGGTCGCGTGAAGTTGACGGATGAACTTCGCAAGGTACTTGGTTAGAGGACCCTGTTTGTGTCTTTTAAATGTAACGCAATTATTTGTGTTGATTCCATTGGCTAAGTTGTTATCCCCAAGGGAAAGGAGGCNGTTGCATCCCTCATTGCTGAAGGGATCCGTTGCTTCAGAGTGTAAATGAAATGAGTCCTGGATGGTAATTAATTTATGCAGTTAGGGGATCACAACCAGCATCACCATGTTCCATCTATTTATTTGCTGGTTGATTGATTCTT
Gma.1822.1.S1_s_at	M20038.1	At4g25150	2e-53	Metabolism			TATCTTGACAAAATGGCCGTAACAGAAGCAAACCTAAAGAAGGCTGGCTTCCACACATGGGAGCAGTTAATTCTCAAGGATCCACATCTTATCACTCCAAATGCACTTTCATACAAATCAGCAATGAGAGAGAATCTGTTGAGGCAGGGATACAGAATTGTTGGAATCATTGGAGACCAATGGAGCGATCTGCTTGGAGACCACAGAGGCGAAAGCAGGACCTTTAAGCTTCCTAATCCCATGTACTACATTGAGTAGTACCTTCACCTCTCTCAACAATCTAGCTAGAGTTTGCTCCTATCTATATGTAATAAGGTATGCTGATATGCACTATTCAA
Gma.17591.2.A1_at	BE474318	At2g43090	8e-12	Metabolism			ATTGGCATGGAAGTAGATATTTGGGGAAGCTGGAACCACTCGTGGAACTGTGTTACCTTTGGCAGCAGCTACCAATTATTTGAGTATATACTATTTGCAACATACTGCTTTCTCAACTCAGATTTNTATCTCGCATTATGCAGTTTTGACATTTGACAGACAGTCAATTCCGCAGATAGACTACT
Gma.8353.1.S1_at	AI855913	At2g05710	0	Metabolism			CCTGGCCAAGATGTGACAGTCACAACCGATAATGGAAAATCTTTCACNTGCACAGNACGCTTTGACACTGAGGTCGAACTTGNTTACTTCAACCANGGAGGCATACTTCCATATGTCATAAGGAACCTCATTAAGCAGTGAAGNCCATNGNCGATNGAAAATTCCAAGGTCATTGTNCCCANTATGCTTTTAAAGTTGTAAAATGTGAGAATAATTTTCNNAGAGATAGGAAAAGATCCCNTTTTNTAGAGGGNGATTTNGACANNNNNCNAGNNNANNNNNNNTNANNNNANNNNGNTANAACNCNGCCCNTTGAAANTGGGGACAATTGTGTAAANGCCGACNTGAAGTGTGAACCCTGCCAATTGCGCGCGGCA
Gma.7479.1.A1_at	BF067052	At5g04740	3e-68	Metabolism			ATAGGCCGGGATTGCTGGTTGAAATCATCAAAGTCATTGCAGATGTAAACATTGATGTTGAATCGGCTGAGATTGATACAGAGGGTTTGGTTGCTAAGGATACATTTCATGTTAGTTACGGCGGGGCTGCATTGAACAGTTCAATGGCTCAGGTTTTGGTGAATTGTCTGCGTTACTACCTGCGAACGCCAGAGACAGATATTGACAGTTACTGAAGAAACCACCCTTGTGAAATAAGCCAATACAATGGTTCTTTCTTATACCAATTCCCCAGTTAGCTCGATATCACCTGCGAATCATANGGTAGCTTTACTGCTACCACATTATGGAATGAGTTATGAGTACGTGTTGCCTATGGAATGAATGAATACCTGTAACTAACTATGGAATGAATACATG…
Gma.3717.1.S1_x_at	AW350536	At1g01710	1e-160	Metabolism			AAATCAGACCAAATCTCCTCCTAGTTTGAGATATTGGTTTAGAGCAAGGGGAAAACTTTCAGATGATGAAGCCTTGCATAGGTGTGTGGTAGCATATACTTCAGATCTAATCTTTCTTCAAGTGAGTTTAAACCCCAACCGTAGGAAGGGCAGGAAGGCACGTGCTGTGAGTCTGGACCACTCCATGTGGTTTCACAGACCTTTACGAGCTGATGACTGGATACTATTTGTGATCTTTAGTCCTACTGCCAATAATGCACGTGGCTATGTCACTGGCCAAATGTTCAATCAGAAGGGAGAGCTACTTGTATCAGTGGTTCAAGAAGGTGTAATGAGGGAAGTTATTTCTGCAAAGTCAGCCATCAAATCTAATTTGTGAAAATCTGAATATGCATAGAA…
GmaAffx.68425.1.S1_at	BI425905	At3g57650	1e-124	Metabolism			TTGGATGGGTTTTAGCTCAGCGTTCAGGTTGCCTTGGCAGCACNCTTGCTGTGATGAAGAAATCNTCNAAGTTTCTACCGGTCATTGGTTGGTCAATGTGGTTTTCTGAATATCTTTTCCTGGAGAGAAGTTGGGCCAAGGATGAACGCACATTAAAGTCAGGCCTACAGCAACTGAGGGATTTCCCTCTTCCCTTTTGGTTGGCTCTCTTTGTAGAAGGAACTCGCTTTACCCAGGCCAAACTATTAGCTGCTCAGGAGTATGCAGCCTCAGCTGGATTGCCTGTTCCANGAANTNNNNNNNNNNCAAGAACTAAGGGTTTTGTTTCAGCAGTAAACCATATGCGCTCGNTTGTTCCTGCCATTTATGATGTAACTGTGGCAATTCCCAAGAGTTCAC…
Gma.4269.3.S1_a_at	CA784404	At1g27450	1e-43	Metabolism			TCCCCGACTTTCCTAAGCCAGGAATTTTGTTTCAGGACATAACCACGCTGCTTCTTGATACAAAGGCTTTCAAAGACACCGTTGACTTGTTTGTTGAGAGGTACAGAGATCAAAACATCAATGTTGTCGCAGGAGTTGAAGCAAGGGGCTTTATATTTGGTCCACCCATTGCATTAGCTATTGGAGCA
Gma.16524.1.S1_at	CD402926	At3g56130	5e-61	Metabolism	Fatty Acid Biosynthesis		TCCCACGGTTGGCTTATTCCGAAGAGGTAGAACAGTGAAAGGGAAGAAGCAACCTCCTATCTGTAAAGAGGGTGATGTAATCAAAGAAGGGCAAGTCATAGGGTATTTGGATCAATTTGGCACTGGACTTCCTATTAAGTCTGATGTGGCTGGAGAAGTGTTGAAACTACTTGTTGAGGATGGAGAGCCTGTTGGTTATGGAGACCCTCTTATTGCTGTGTTGCC
Gma.3405.1.S1_s_at	AW350922	At1g10070	1e-114	Metabolism			AGAGGATTTTCGGATGTGCTATACCTTGATTCAGNCACNAAGAAAAATCTNGAGGAGGTCTCTTCTTGTAACATTTTTATTGCCAAGGGCAAATGCATCTCAACACCTGCTACNAATGGAACTATTCTTTCCGGAATTACNCGAAAAAGTGTCATTGAAATTGCTCGNGATCATGGCTATCAGGTAGAAGAGCGTGNTGTTNNCGTGGATGAATTNATTGAGGCTGATGAAGTTTTCTGCACAGGAACTGCGGTCG
GmaAffx.37477.1.S1_s_at	BQ081355	At1g10070	2e-15	Metabolism			AAACTGTAATAATGATTGCCCATACGAAAAATGGNCGCATATACTGTTGTTCGTTATCTAAAAGCATGTTATATGT
GmaAffx.88815.1.A1_s_at	CK605868	At3g03780	1e-116	Metabolism			GTCTTCTGGTCATCTCTGGCTCAGAGCTTTACCAAGCGCCCAATGAAGGGAATGCTTACCGGTCCTGTTACCATTCTCAACTGGTCCTTTGTTAGAAATGACCAACCTAGATCTGAGACCACCTACCAGATTGCTTTGTCTATCAAGGACGAAGTGGAAGACCTTGAAAAGGCTGGCATCACTGTTATCCAAATTGATGAAGCTGCTTTGAGAGAGGGTCTTCCACTGAGGAAATCAGAGCAAGCTCACTACTTGGACTGGGCTGTCCATGCCTTCAGAATCACCAATGTTGGTGTCCAGGATACCACCCAGATCCACACTCACATGTGCTACTCGAACTTCAACGACATCATCCACTCCATCATCGACATGGACGCCGATGTTATCACCATTGAGAAC…
Gma.5031.1.S1_at	BI970511	At3g54470	1e-110	Metabolism			ATGCTCACATAATCTCAGGTCCTGGAATTGTTGATGGATTAAAATTGAAGGGTTTACCTCGTGGTAGGGGTCTATTACTGCTTGCTGAAATGAGCTCAGCTGGTAACCTTGCCAAGGGAGATTATACAACTTCTGCAGTAAAAATTGCTGAGGATCATTCTGACTTTGTAATTGGCTTCATCTCAGTCAATCCTGCATCATGGCCAGGGGCACCAATAAATCCTTCTTTCATTCAGGCAACCCCTGGAGTTCAAATGGTAACTGGTGGCGATGCTTTAGGGCAGCAATATAACACTCCATATTCTGTGATCCATGATAGGGGCAGTGACATCATCATCGTGGGACGTGGCATCATCAAAGCAGCAAACCCTGCTGAGATAGCTCGTGAATATCGTCTTC…
Gma.2213.1.S1_at	BI970373	At1g05680	6e-56	Metabolism			TGGTGTCCCCAACTACAAGTCCTAACACATGAGGCTTTGGGGTGTTTTCTCACACACTGTGGTTGGAACTCCACATTGGAAGCTTTGAGCTTAGGAGTTCCAGTGATTGCAATGCCACTGTGGACAGACCAGATCACAAATGCAAAACTTCTAAAGGATGTGTGGAAAATTGGAGTCAAAGCTGTTGCTGATGAGAAAGAGATAGTTAGAAGAGAAACAATCACACATTGCATAAAGGAAATATTGGAGACTGAAAAAGGAAATGAAATAAAGAAAAATGCCATCAAATGGAAGAATCTGGCCAAGAGTTATGTTGATGAGGGAGGAAATTCTGATAAAAATATTGCAGAATTTGTGGAAGAATTGGCTCACCGCTGTGCTGCAATAAATTGATGGGGT…
GmaAffx.37055.1.A1_at	BM142939	At3g02100	6e-41	Metabolism			AGCCACCCTGCAATAGCTTGTTTTATTAGTCACTGTGGTTGGAATTCTACCTTGGAAAGTGTGTCCAATGGGGTACCTTTCTTGTGTTGGCCATATTATACTGACCAATTAGTTGACAAGGCTTACATTTGTGATATGTGGAANGTGGGTTTGGGATTCGATTTGGATGACAAAGGGCTGATATCACGTTGGGAGATAAAGAAGAAAGTAGACCAAATCCTTGGAGATGAGAACATAAGGGGAAGGTCTCAAAAACTGAAGGAAATGGTTCTAAGTAACATTGCAGAAGGGGGACAATCCTATGAGAATTTTAACAAGTTTGTGGAGTGGCTCAAGGAATAAAAATGTATTTGTTGATGCTCTGATGTTGTGAACAATGTTTATGATGTTCCTGAAAAA…
Gma.8532.1.S1_at	AF198453.1	At3g16520	2e-57	Metabolism			ATGCACGTCGAAATCCCAGGGTTACCGAAGATCCACACCGATGACATGCCGGAGACGGTGCAGGATCGTGCGAAAGAAGTTTACCAGGTTTTCATCGACATCGCCACGTGCATGAGGGACAGTGACGGGGTTATAGTAAACACGTGTGAAGCCATGGAAGAGAGGGTTGTGGAAGCTTTTTCCGAAGGGTTAATGGAAGGAACCACGCCGAAAGTGTTTTGCATTGGACCCGTCATTGCTTCTGCTTCTTGTAGAAGGGATGATAACGAGTGTTTGAGTTGGCTCGATTCACAACCGAGTCATAGTGTTTTGTTTCTGAGTTTCGGAAGCATGGGGAGATTCTCGAGGACTCAGTTGGGAGAGATTGCTATTGGGTTGGAGAAGAGTGAGCAAAGGTTC…
GmaAffx.82240.1.S1_at	AW203386	At4g34135	5e-65	Metabolism			CTGGGTTACCCGATAACTTGGAGATGACGCGCTTGCAGTTGCCGGATTGGCTTAGGTCTCCGAATCAGTACACTGAACTGATGAGGACGATTAAGCAGTCAGAGAAAAAGAGTTACGGTTCACTTTTTAATAGTTTTTATGACCTCGAGAGTGCTTACTNNNNNNATTACAAGAGCATCATGGGAACTAAGAGTTGGGGAATTGGACCGGTTTCGTTGTGGGCGAACCAGGATGCTCAAGATAAAGCTGCACGAGGGTATGCTAAAGAAGAAGAAGAGAAAGAAGGGTGGCTTAAGTGGCTCAACTCCAAAGCAGAGAGCTCTGTTTTGTATGTGAGTTTTGGGAGCATGAACAAGTTCCCTTACTCTCAGCTCGTTGAAATAGCACGTGCGCTTGAAG…
GmaAffx.60495.1.S1_at	BU081783	At5g39320	3e-23	Metabolism			GAAGCTACGTGAGATTGGTTTCATTGTGTACTCAATTGGCAAGCCATTGGATCCATGGCTCAAGGACATGCCAGCTGTGGCATAAGAGAGACATTTCATCTCAAGGATTTTGAGGCATTATTCAGTTTGGTTCAATTTTATTANTACTGGCAATTGTTTTTTGGAACAATTTTCTTGGTTGCCATTTTTCACTTTCCCATAATAGTTGGCATAAATGAGTATAAATTTTGGGAAAGTAGGAGGCCATATGTTTTGGGTTTCCTTGTACTGCAAGTCATCACTACTATTT
GmaAffx.51786.1.S1_s_at	BU761090	At5g57560	3e-16	Metabolism			GATCTACAATTACTGCTCTGACACTCAAAGATTTCCACAGGGCCTTCCTTCAGAGTGCAACACAGCCTAAAGATATTTAGTTTCCCTGTGGATTGATCCAGACTCCAATTTTCGGCTCTCTTTGGAGTTTCCTT
Gma.3881.2.S1_x_at	AW349366	At2g30490	6e-82	Metabolism	Cytochrome P450	CYP73A	AACCTCCACGATGCGAAGCTTGGTGGCTATGACATCCCAGCAGAGAGCAAGATATTGGTGAATGCATGGTGGCTGGCCAACAACCCTGCACACTGGAAGAAGCCAGAGGAGTTCCGGCCAGAGAGGTTCTTGGAGGAGGAATTGCATGTGGAAGCCAATGGCAATGACTTTAGGTACCTTCCCTTTGGGGTTGGCAGAAGGAGTTGCCCCGGAATCATTCTTGCATTGCCTATTCTTGCCATCACTTTGGGACGTTTGGTCCAAAACTTTGAGCTCTTGCCTCCCCCTGGCCAGTCCCAGATTGACACCAGTGAGAAAGGAGGGCAGTTTAGCTTGCACATACTCAAGCATTCCACCATTGTGGCAAAGCCAAGGTCATTTTAGACTTCACCACATGAT…
GmaAffx.90932.1.S1_s_at	CF806657	At2g45290	1e-129	Metabolism	5-Phosphribose 1-diphosphate Biosynthesis		GGTGGTTACACCATTTCGGACAACTCCACTGGCAACNNNNCTGATGTCATTTTGATCGGAACTGGTTCGGAATTGGAAATTGCTGCCAAAGCTGCTGATGACCTAAGGAAGGAAGGGAAGGCTGTTAGAGTTGTTTCCCTTGTTTCTTGGGAACTTTNTGATGAGCAATCAGAAGCCTACAAGGAGAGTGTTTTCCCTGCTGCTGTTTCAGCCAGAGTTAGCATTGAGGCAGGATCAACATTTGGGTGGGAGAAAATTGTTGGAGCAAAGGGAAAAGCAATAGGCATTGATCGTTTTGGAGCTAGTGCTCCAGCTGGAAGAATATACAAAGAATTTGGTATCACTAAGGAAGCTGTTGTTGCTGCAGCTAAAGAGCTTATCTAGAACTTTTGATTTTTT…
Gma.12226.1.A1_at	CD402061		0	No Homology to Known Proteins			TCCGATGTGATTCGCCTGGAGTATTATATGCCCACCAGCTTTCATGGTGTTGTGGCATAATAAACACAAAACTTGGGAAGTTAGTGTGAGTTACCCTAAGTTGTGTTTGTTTTAACTTTTAAGGTATCAAAAAGGATTCCTCAAAAAGTGAACTTGGGAGTATCACATTTCCATGTTTGGTACAAGTCTTGAATAAATATTTTCTAGAGTTATTGATGCCTAGAATATAAAATGTTCATATTTCCCTCGCTTCTTATTCCCATGGTGAAAGTTGGGTATCTTAGAGTGGGAATGAAATTTATTTTCTACGAAAACTACCTATCCTCAC
Gma.12359.1.S1_at	AW309567		0	No Homology to Known Proteins			GAACAGACAGGATCGCAACAAAGATATCCACCTTCTGGCCCAGGCACTTTTACTGGAGAGGGAAGATACTGATAGTAATCTGGGACATGTGGGCGGCTTGTATTAAAGTACTAATCACATTCTAAGCTGATTCCATGTCCTTGCCGTTTGGTGGAATATTGATATATTGAGCTTTCGTTGTGTATCCATCAATTTTAGCTGCACTGTTCTGTGACAAAGTTGGATCTGGTATGTAAAGTTAGTACTGGCTGCAGTCTTGTTTTTTGAACATGGTTGAACTAAGAATTTCACGTGGATTCTTGTGCTAGTGACTG
Gma.12536.2.A1_at	CD401630		0	No Homology to Known Proteins			ATCGCTGTGAATCCCGTGGCTACATCGAATCCATCGATTAACCCACCTAATGGATCATTCAGGATTAAACCTACCTTTACATTTGTGGTGGTCCTTTTGCCACTTATAGCCATTTTTTGAGCATTCCTANNNCNANNNNANNNNNNNNNNNTNNAGTNNTTTTTTTTTTTTTCATTATAGTTGATTACACGAGAAGCATTATTGCTTCCCTTTTTTTCCACCAGTCATAATAGCCTCTGATGGCCTTGTGTATAGCGTACCCA
Gma.13208.1.A1_at	BG043609		0	No Homology to Known Proteins			AGAAGCTTTCAGGACAAAACAACAATACCAACNATAACTAGCTATTAGCTAATTAATATATAAACAGTTTATTTGTGTCATAGTGTGGCAAGGGGTAGGAGAAATTAAAGGGTCTGTGTCAATGATCTTTTTCTCAAATGTTATGTTAGCCCTATATCTTGTTGACTTAGCTTCTTCTTTTTTTTTTTAGGTTGCATCTTAGTGGGAGGTTAAATTAATTAATTTTCTAGCANTAAGTTTAGAGTGGTAAAATAAAGATAAATAGGTAATATGCCAATTGTAAGCATTACATGGAATATAGCAATCGTGCAACTCTGTGTAAGA
Gma.15554.2.A1_at	CD398885		0	No Homology to Known Proteins			ACAATTGCCTGGTTGTTACTGCATTTAATATACCAGCAATGTGTTCCATTTTGGGCTTGGAACTTTTTAAGGTGATCAATATTGTGATTCAAATTTTCAAATTGAAGAAAGGTTAGTTCATTATTATTATTTTTTGGCTGATTTAGCCAGGCAACTCAATTTGAGAGGGTTGCACCGGTTTATATGTACGAAATTAATTAGAATGTACATCTAATTATGGATTGTATATATAGATTGTCGTTT
Gma.16246.1.A1_at	CD406801		0	No Homology to Known Proteins			CAGGGATTCCAGCTGTTTGGTTAAACTACCAAAGAAATCTTTGAAACTATCAACTAGCCCAAAATTATTTCAACAGCATTAGTCTCAAGTTTGAGTCNAACGTATATAGCTGCATTTATCGCTCACAGTGGTCTTATCTGGCATGATTAGGATTATCTACAGTGAAAGACACTAGTAATCTGTACCC
Gma.17113.1.S1_at	BE803442		0	No Homology to Known Proteins			ACTTATCATATCTTCACTTTGCTCTTTTCTTTCTCTGGGTGTTATCTAGCATGTCATGTCCATGTATAATTTTCCAATTAGAAAATGACAGATACTTGCAAATTATCAAGTTGCATCAATCAACAGTGTTGATTAGTTGATTTATNNNTNNNNNANNNTNNNNNNNNNNNNNNANNNNNNNNCTGGGGAGTGTGACTAATTATGTCACCACAAATGCGAGTTGCCCTATAACGATTGTGAAAGACTCTGCCCCTTCTACTAACTGATATGCTACTGAATTTGGTTGGCCTTTGTAATCGGTTGTTTTTATCTTCATCAGAGACCAGACTGCTTTTCCCTCCGTTCTTACTTCTTACAGATGCTTAATTGGGTTTATGAACACACATGATGATTAAGGAT…
Gma.18064.1.S1_at	BG510539		0	No Homology to Known Proteins			GAACAACCGTGTTATTGCATAGAAAAGGTGGCTTCGCAATGTAGGGATGATTTAGGAGTCGAGAAAATTGTGCATGTATTTGTTAGTAGTTGTTCAATTAGGCCATGTCCCATGTGTCTGAATTTGAATAATTGTATTTTAACTAATGCACATTGTACATATTATTTATATGTACCTATGTTAAAACTTTATGTATGGTTAGAGATTGTGCAAAAT
Gma.1976.1.A1_s_at	BM519790		0	No Homology to Known Proteins			AAGCTCTTACAAAGGCCAACTCTCATGACAACCNACTGTAGTATGCACCCATTTTATTCTTGACCTCTAACCGATTGTGTTGTACAGAATGTAGTAGATGTTATTCCTTTTGTTGTACCAGGTAGCAGTCTCCTGTATGGTATACAGCTTGGGTAAAAGAAATATCTAACGCCGGAGTCATGCTTCTTCTTCTTTTTAAATGAGGTGTAAGCCCCTTTGTGTCTGTAACGTCATTATCATAGATA
Gma.1995.2.A1_at	BM143594		0	No Homology to Known Proteins			ATGGTGATGCATTCAGATCTCAATAAATTGCTCTTTAAGAGAATTTGATAAGCCTCTTGTGATGAGTTGTGCTATTCTGTGATTGAACTCCTCTTTGTTATTAAGTGGGATTCAGTCTAAATTAGATTCTAGAGCAAACTCATTCTTGTTGACAAGTAGTTGCATCATTTGTGAGATTGTTGATATGGCATATGAATTTCCTTGGGTATTGTGGAATTAGTAATGGGAGCCTACTAATTCCACGGTGTTATAGTTTCTGGTCTCTTTTAATTTAATAATTAATTCTTGAACGATGATGTCTTGTTAGAAGATAAGAGACTTATGTAATTGTTGTTAGCTGTCCTTGTTTCTGGTCNACTTNCATCTTGTAAAATATGTGGCNCCAAGTTATTAAAACAT…
Gma.3149.1.S1_a_at	BU544575		0	No Homology to Known Proteins			CAGCGTATCACGGAACTTAAAATGGAGAGAAGTGTCCGCATGCTTCGCCTCCCTCCCGACATGCTTTCACATTTGGAGAATTCAAACAATAATAATTATTTTCCTTTGTAATGTGCAAAGAAATTAATTGTTGTTGTCACAAGTTTTAATGAGATACGATTTCTTAATTTCAAAGTCCCTTTGTAG
Gma.3837.1.S1_at	BE822106		0	No Homology to Known Proteins			ATGGTTGCTGCTTCTAATTGTCTGCATTTGATTAAAATGCTACTTGTTTCATCCGTGGTCTCTGGTATATGCTTGCCGTTTGGGAGCAATGGTCATCATCTTGGTTGTGTAGGACACTGTATTGTGTATCCTCCTTCGGCAAAATCACCTGTTGATCTATGATCTCTGANNNCNGNNNNNNGAAAGAGTGGTTCCATTTAACCAATTGAGTACTCGCCAAATGTTTTTCATTCTCCACTTGCTGCTCTTTGGTCTGTGTCCACAGTTTCCTCATGTGGCTGATTAACTTTTGCATGCTTCTGTATGGAATTGTGTGTCATCTTCAGCTACTGGAATCCGTGTCACTTTGTCTCCAATCTGAAGTTTTGTTTTGCTAAATATCGTCCGCTCCTAATCAAG…
Gma.3940.1.S1_at	BG511678		0	No Homology to Known Proteins			TAACAAAGCTGTTAATTGTCCAAATAAGCAAGGCTACCGAAGCTGCTTGCCTTCCAAAAACGGTGGTGGCCCTAAGCAAAGTTGTGGCGATTACACCAGGGTTTGCTAAGAACTCGTTCCAACCCTTGTGATTTCATTTCTGATTTTTAAGATTGTGATATGATGGAATCTTATTTATGTCAATTTGTTTAGTTTAATTTCCATATGTTATTGTTTTTTTTAATATTAAGTCAGGTACCAGAAAATTTGCATCA
Gma.4020.1.S1_at	AI759753		0	No Homology to Known Proteins			GCATTGGTCCCAAGTCCACGACAGAGTTTCAGTATGAAGTCTTGGCTAGGCATCAAGGAAACGCTTTGATTCTACAATCTTTTACCAAGATTGTGCAAGGGCAANANNNNGATGCTCCATCTAGTACGTTCCTTTTGATTCCGTCTTGTTTGTTTGGCTCTCCACATCTGAAACTGGATATTCGCATAAAGTCACACCATTAAACCTTGGATGAAGATTGATGGAGGCTGTGCTTTCGTTTATTGCTGTATGTACTGGTTATCAAATAGTTTATTCCATGCAGCTCAGTTGACTTTTGTCAAGAAGGTTGCAGTCATTAAGTAGNAAACTAAAGAACGTTTTTATGCATGCATATCCTACAAATATG
Gma.4075.1.S1_at	BI700202		0	No Homology to Known Proteins			TTGCTGATCACTCTACTTTATACATCTGTATAAGCCTTTAGTCATGTTTGAACCAAGGGACATGTGGACCAAGCTGAAGGAAAAGGGTGAGACAATTTTCTCTAATGCTGGCTGGATTCACCGTGAACCTAGCCAGGGAATTCAAGGAAAGGAGAAGAGTTCACCTGGGTTGGCTGTGGTTGCTGGCCAACAACACGTGCAAGTTCACACACCTAGGATGATGTATTCCGAGGCTTCAGTTTCCATGCTTGTCGAATGCTTCAGTGCTTGAAAGAACAAAAAAGGATAAGTGCCTACTCTTGTACTTGTTAT
Gma.4102.1.S1_at	CA851288		0	No Homology to Known Proteins			TACAGGAGCTACTCTCATTCTGAAAGCTCAAACCGCAGCTACCACATGCTATTGGCGTCTGAATCCTTCACAGGATCTTCTCACAGAAGAACAAGGTCTGATTTTCAGCCCCCCACAAGTGAGTTCTTAGAGCAGAGATATGGTGTTGATGGATTCTTGGTCAGCCCCAGAGCCCAAGTTACTACTGCTGCTCCTCCTGCCACTGTCAATGTTAATGCTGCCCAACGCTCTAACAATATCACCAACATGCGCAATCGCAAGTGATATATATCTTCAACATCATAGGGGATGNTCAACTTTTCTTTTAATTTTTTGGACCCTTAGATATTTATTATATGTCTCTTCTAAGGTTTGATTCATTTGTTTAAGATGACGGTTGATGGGTGATTACCAATTGTA…
Gma.4610.1.S1_s_at	BM522856		0	No Homology to Known Proteins			CTGGTGGCTGCAAGTGATTAAGATTAAACATATGCTTTGGGCTAGTTAGAGAAAAATCAATCTTAATTGGCTCTAGGCTTTCATAATTATTGTTGTTCCTTTTATTGCAAAGTGTACGTAACAGTGGCAATAGAAAAAAAAGGAAAACAAAAATGTGGGAATTAAATATAATATAATTTGTAGCATGAAGAAGAATGGAGGGGTGAATATATGACTCTCAAGCCGTGCGA
Gma.4744.1.S1_a_at	CA800035		0	No Homology to Known Proteins			TAAAATAAGCTATGATCGCCACAAGCTATTTATGTATTATTTCTAATGCTTTTGCTTCCTCCCTCCCTCTATCCACTGTTGTTGTCCAATGTC
Gma.490.1.S1_at	BM308593		0	No Homology to Known Proteins			ACAGGGCAGTGACCTGTACTCCCAAAGTATATAACAGAAAGTAAGTAGAGGTACATCACTGACTTCATATATGAATGGAGTTGTTTTCTCAACTAGATTGCCTTTAGATTTTTTATTAGTCAGGTAAACAAAAGGTTCCCGTATGCTTGGAATTTTGGCTGAATATAAT
Gma.5188.2.A1_at	AW350362		0	No Homology to Known Proteins			AATTTCGGACCTGACTTGATGGTCATCAATTTCTTACTGCATGTTGAAGCATTGGTGAGCTGAGGTTCTTGCCTTCTTGGGTACTATTTTATATCCAGATTTCAGGATGTTAATTGTCAATAGGGGATTGCAAATTTGTGAAAAACTAATTCATGGGACTAGTATTGGCTTTGTACACAAGTGTGGGTGTTCAGAATATGAAGGAACAAAAAAAATTCAGCAAGCATACTGATGTACACCGAATGACTAAAATTACCTTTTGGAAGCTTACCTATGCCAATATAAGTGCTGACCGGAAGAATGTGTAGAAACTAGAAAGAACATGTAGTATACTGGAGTTATATTCATGATCCATANTNAGTAGCAGTTCCAAANACCACCCCTTTATGGGTTGGTGCA…
Gma.542.1.S1_at	CD400586		0	No Homology to Known Proteins			TCCGCCTCCGCTCTGGACTTAGTTTCGGGGCAGTCGCCGGTGCCGGCGCCGGCGCCGGCACCAGATGCCGGAGCAGCTGGATCCGTGTCGAGCTCGGTCGCCATGATTGGAGCTTCCGTTGTGATTTCATTGCTCGCCATCTTCAAGCACTGAAGAATAATCTGATGATGGATCGATTTTGTGTGAAGATTATTGATTCGTTCTGCACACTCAGATTTATTGTTGCTGCTTTATAATACGTTACGAGTGATGATTATTATGTACGTATAAAAGAGAGAGAGAGAGGGATTTTACACCATTCTTATATTGAACCATTTATTGTAGGTGTTAGTGAGAAATAAGAGGGATTTTGAAATCCTCTGTTATCATCGTAACATCGTTATTTCAGTGT
Gma.6088.1.S1_at	BE822132		0	No Homology to Known Proteins			TGTAAGAGTCATTGTGCACAGCTGACTTTACTTTTCACATTGGATGATCTAGCCAAGAATTTACTGGAAGCTTTTTGGGTGATCAATTGTTACTCTTTAAGAAAAAAGGGTGCCACTGTTATTCCCCTTTCGCGATGTTGGATTACGAAGAGTTTGCATCATCTGGAAATAATTGTATTGTCATTTGAAGGGAAAACTAAGAGAAAGAGTCTATATGGCCTTCATTTACTTGGCTTCATTCTGATTTTGCCCAAGATATATTACCTTTATTTGTNTGTACATCTGTATCTCTGATTATTGATTTTGCATTTTTGTGAGTGGTGTTTGTGTTTTCACTGTTCGTTCATGAAGTTTTGGCTATTCTTTTGAACTGACTTGGGCCTA
Gma.6338.2.S1_at	CA782625		0	No Homology to Known Proteins			CTTTGTCCAATCTTTCACACTGAACTCTTCAATTTTCNATTCTCTTTTTCNTGCACCACNNNNNNNNNTNTTNNNNNNNNNNNNNNNNNNNNTCTTCAGACACCTTCATCATCTGCATACCGCTTAGCTCCAAAAACTACACACACAAGAATTCTGTTTCTTTCTGTTGATTTGATGGATCCGCAGATCTAATGGTTTCACACACTTTCTTCACTACGGATCATTGTCTTCTTCATCTGGGGCACCCCAATAGCTTCTTCTAATCGATAGTCAAATTTTGTTGGTTTGTGGTGGATCATCTTCGTCGTTGTGGTGACTAGTGAGGAGTGCAGGACTATACCTATCTATA
Gma.6487.1.A1_at	CD403790		0	No Homology to Known Proteins			ATGGCATCCCTCAAGGCTGACAAACCCGTTGGCACTCAACTTTTTGGGCAGGGTAAAAAGGAAGCTGCTCCCAAAGCTAGTGATGGTGCATCATCCAAATCCAAGGGTTCAGCTTCCAAATCTGCTACCAAGAAAGTTCCAGTACAGAAGCCCCAAGAATCCAAGAAAAAGGGAAAAGGAGGCAAATCATCTACNAAGCACTAGCCAGAAAGCCTTATTAATTTACTGAAGGAAAGTGTGGTTTAATTGTAAGAATAAAAAGCCACACAAATATTGGATACAATAAAAATTGTACCTTGTTTTCCTTTGCAGTCAACGTATCTTGGCTTCCTATGTGATCAGCTTGCTCTAGGCTTGATAT
Gma.6676.1.S1_at	CA819837		0	No Homology to Known Proteins			GAATTATATACGTACATTGCTTGCATTCTTGGGAGATTTGAGGGGAGGTTTTGTATTCGAGGACAGTTATTTTGTATGGCACTATTATTAGTGTATCGATCGTTGC
Gma.7056.1.S1_at	AW704807		0	No Homology to Known Proteins			CACCTTTTGGTAGATTCACTGCTGAAATTTTGATGGCTGTGATGTTTGTGGGCTTGTTTTGTGTGACCAACATTGTGGCACAGGATTCAGAGATTGCTCCAACAGGGCAATTGGAGGCTGGAACTGGGTTTGCTTTGCCTGTTTCTAAGGTGATCATGTGTTCCTCTGTGTTGGCATCTCTAGTGGCATTCATGTTGCAGTGAATTGGAAGCATTTGGGTTTGAAATTAATTGTCACTTTCTGGGGGCAATCTTACTATATGAGTTAAAATTGATATGTTTATATATACTGCGTGTTTGCTTGTTGAAAATGGTGATACTGTATTTTTTGGCATTTTGTAAGATTAGCTTTATGATGAGCTACAGTTACAAGTATGTAAAATTTCTACTCAGCTATTAN…
Gma.7175.1.S1_at	BQ453819		0	No Homology to Known Proteins			GGACAAGGATACCAGATGCAACCCCCAACTGGATTGCCTCCCGGCTCCAACATGCCAGGTAATTATAATAACTCCATGATGGGTTCAGGTAGTTATGGTCAGCAGCCATATGGTAGTTATGGTCAGCAACCATATGGCGGCTACCGATGAGATAGAACATTATGCCTAGATAGCAAGGTGAAGTACATTACTGATTGTTTTGCTACAAGTTGAGAAAGAGAAATGCCAATACAGTGCTACTAGTAGTAGTCTGTATTTTGAATTTATAGCGGTGTATCATTAAAGCTGCAGTTTGCTGTAAAGTGACCCAGTGTGATGTATGTGTATTTCTTGTTAT
Gma.8563.1.S1_s_at	BU761175		0	No Homology to Known Proteins			CAAACACAAGTTTGTTCTCCCTTTGTAATTTCAAACACTAAAGGCAATCCTTTTGTTTTTGCCCTCCTGTAAATGACTGTATATCATTTTCAAACTATAATCTGAATTGCTGAATGCAGAAGT
Gma.8669.1.A1_at	BI967417		0	No Homology to Known Proteins			TAGCAGCTTCTGTTGAAAGTGAGGTAGTTCGAGACAAACCAGAAGATGCAGCCAACTGAGAATCTTTTTTCCTTGTGAATATTAAGTGTTTTCTTGGCTTCAAGAGCATGAAAATCCAGCTGGTGGATAGGCAGGCTTTTGGATATCGTTGAATAAATTTTGGATAAATGTTCGTCAAATTATCGTCGTGTATGTATA
Gma.8818.1.A1_s_at	BI971092		0	No Homology to Known Proteins			GTACTTCTTCGATAACTGCATCTGTGAACAATGAAGTTGATAATCTGCCGCTGCCGGAGGATCATAAACGAAAACGTGATCAAATAACTGGGTCAAGTTTCATATGAAGTGGTTTCTAAGTTCCTGTTTCAGTTCACGAATCTAAATCGTTTACGCATTCTATATAGCCTATTTTCATGAATATCATCTTCTTGCTGCCTTGTCTAAATTTTCAACAATCTTTAGTATTTTTTGGCTTTATGGCGTGGTTGCAAGCACGGCAACTGTAAATAGTC
Gma.8870.1.S1_at	CA802901		0	No Homology to Known Proteins			GGTGTGTTGACCGTTCTATGCCAAATTTTAAGGGTGGCAAAACTTTATGAAGTTTGTTTGGATCGTGACTTGTGAGATGTGGTCAGTTGCAACTCAGTTTTTCTCCCTAATGTCCGTTGTGGCTCATAAATTTGTCTGTGTTTCTTTCTTTCTGCCTCAGTTACTTGTGGATTTTGTTTGGTCTGCTGGAATATGTTACTGACTCTTAACTATACAACA
Gma.9388.1.S1_at	CA801854		0	No Homology to Known Proteins			GGAGAATATTGATTGAACCCACTGTACGTCATTGCACTGTTCAGCGAATGTTCTGTCCTCATCTTTCCAACGGATTCTTACACGGGACCAAGGTTTGAAATGTGGATGATCATCTCTGTAAAAAATTTATTCAGGCTACAGTTTTCAGGTGAATATGATATGATGCAGGCATACTGGTAATATTGGATCAAAATCCATAGGATTATGACTTCACTTTTCTTCTGCAACAAGTGTGGCCTTCTTTTGAGGTGCTATCTAGTGTGGTAT
Gma.9511.1.S1_at	CA850830		0	No Homology to Known Proteins			AAGTGACACTCTACAATGGTTCCAAAGCTTAGTGGTGACGTGGATGATGGTGGAACTGGGCTTGAAACTAAGCCTATCTGAACAATACCCTCCTCTTCCTTCTTCTATTAAGGTTGAAGTTCTTAGATAAGAAGAAGAAGAGAGCATAAGATAGCCTTTTGAAGCTGAAAGCAAATTTTGTGAAGTAGCATATATACTTTCAATTTGTTTAGTTCTTCTGGGTGGAGTTCCTTCATTTGGTGTTTGTAGTCATGGAGGTTTCTTGGTTCTATACCTTTTGCAGCTTTTTATGGATCCAACCATCCCAAATGTGCCAATGGTTCAAAAGAAATGATATGATAACAGAAGCTCATCTCCTTTGTTACCAGATTGACCTGATNGAGTGTTAGACTTATTTGT…
GmaAffx.10340.1.S1_x_at	CA938421		0	No Homology to Known Proteins			GCCACGGTGGTGGATACTACCCTTGAGATTAATTGATAAATTACCCAAGAAAATAACCTAGCTAGCTCCTTGTGGCTATAGTAACAATAATAACAAATGTATGGGTACGAGTACGTGGATGGTTAAAACTATTTATGTATTGTATTTTACTTTTTTATTTTTATGTCTTACATATATGTCGAATGGATTGAAGACTTACATCGATGTAAACGTATTAATATA
GmaAffx.11297.1.S1_at	BI967760		0	No Homology to Known Proteins			TTATTGTTATTACCCGTTCTTGCTCGTAAATTCATTATGCAGTTTTTATGTATGTTGAATTGCTGGCTTCGGAGAAATTGAGGGTGCGCTTATGCTGGGAGGCGGCATTAAGTCCATTTGAAGAATGCATAGATCACTGTACAATTATTCTAAAACATATTATTGGATTGGTTTGTGTTGAA
GmaAffx.11850.1.S1_at	BI969763		0	No Homology to Known Proteins			GAGTTTGGAGTAAATCACATGATATTTGGGAGGTGAATGGCTGAAATTGCTGCTCACGCTGCTACCTTGTGCTATGTTGTGGCTGTTGCTGTGCTGAGATCCTGTGAATGGGACTAAGGTTATAATTGAACAGTGAGGAGCTGATACAAATGATGGCAGTGAAAGAGATTGNGGTTTGTGGTATGGAGTTGCGATGGATGGTCGTATGTGTACAATAGATGAACNACATGATGTGGGAAACATGGGCTCATATCATCTTCAGAGCTATGAATTGTCTCATAAACCTTAACATATTTACTTACCTGGATTTAAAAGGAGTGGGAACTTTGTTGTTTGCTTGTGATGTGGATGTGATCGATACGTTGTGTTAATGTAAGAAACAGNCTATTTCGGCTNAGG…
GmaAffx.274.1.A1_at	AW351249		0	No Homology to Known Proteins			TTCTTGGACTTTGTTGTGAGATTATTGCTTTTTTTTTTTTANGCTGCACAGCCGCCATTCGAAGCCCAACCAAACATGCNNNNNGGCTGGAGCTGATTGNNGCTTTCGTTGATGTCAGCCAACACTATTATTACCATTATCTAGTTGGACATTTAGAAGGTTGTGTATTTCTTTTTTAATTGTGAGAATTGAAGAAAAAAAGAGAGGTGAGATTGAGAACAAGAGCGAGGAGAGATGCTTGTTTTCTTTGTTGATTGCGTGTATCCAGTAAAGCCAAATG
GmaAffx.28775.2.A1_at	BM523185		0	No Homology to Known Proteins			AACATGGTTGAACTTTCTGGCGTTTNTNAGTCAAANCGAAACACTCATCAAGCATATTGAGAGATTTATGTTNAGTNACCACACNCCNGNGGGTTCAAATTCAAATATTTGCACCTGGCTTTGTAAATTGTTTATTGTTATAGGAAAGATGAAAGNCAAAATCTGCNTNNNNGNNNNNGGGGANAAGNGGAAATTACGGAGACACNNNTATTGTGGAGATAAAGNTGNCCCTAGTNTNATTTTTTCAGATTTTTCTGTATTGTATTATTTTGTAATCTCATAATTNTTGTAAGGTCTTTCTATTCGTTGAGGTA
GmaAffx.32328.1.A1_at	BI968685		0	No Homology to Known Proteins			GGATGCCCCACGTGTGGAATTACTGATGTGAGACTTTAGTACTTAAACCCTCTCCTCCACCTATGCCACCATGAAATTTTTTTTTTTAAAAAAAAAACAAGAAAAAAAAAGGTATAAGGGGGAAGATAAAATCAATCCATTGTTTTAAGTCATGGTGAGTACTTATGTTTTACCTGTGGTGTTTTAGCTATTAATGTATACCCATCCATGATGTGTCCCTATATATTAGGAAAA
GmaAffx.35530.1.S1_at	BE800387		0	No Homology to Known Proteins			GTTCTTCGTTGACTTATTACCTCTCACCTTCTAAGCTTGTGTTCGTATACCTGTTGCAACGGGGAAGTGAATTGCAAATGTTCCCATTTTTGAGAAGCAACGATTTCTTGTGTTTGTATACTCGTTTAGGGCATTCCAAATAGAGAAACAAACATGCACACTAAGTTGTCTGAACTGTTAGGCTGTATTTCTGTTTCCTCTTGGATGTGATAG
GmaAffx.39130.1.S1_at	AW308946		0	No Homology to Known Proteins			AACGTATCTTCTCTACTTCTTTCAGTGTGTGCCCTTAGTCAAACTCCTCAATTCTTGTACGCGTAATATATGTTCATGTGA
GmaAffx.39765.1.S1_s_at	BQ785586		0	No Homology to Known Proteins			AACTTCTGAAGGTAGTTGAAGCCAATTATTATCAGACTAGACATCTGCAATACCCTTATTACTATAGCAGAACTGTGGAAGAGAATCCAACTGGCTGTGTTATTTGCTAAGTATTGGAGTTTGATGGAT
GmaAffx.45757.1.S1_s_at	BI471054		0	No Homology to Known Proteins			AAAATCATCATGTAGTTTGTGCGAGTTTTAAGTTGATCCATCTTTTGCATATGTTGAGGCCTACAATTTGTCAAAGAGAGGCTGCCCCATTAAAGAAATTGA
GmaAffx.57121.1.S1_at	CD407096		0	No Homology to Known Proteins			CTGGTTTCTGATTTCGAAAAATGTTATCAATGATTGCAGTCATCAAAATTGGACTGGGTTTGTAGTATTAGATTCAGGGTGCTCCGAATAATTTAGAGTTTTCTATTTTTTTAGGATTCTTATATTTGCACGTTACANTTTTCCTATATTTTTTATCGGGTTTGATATAAAGGATAATGATGTACAGAATTTCCCTTGTATTTATGAAG
GmaAffx.57961.1.S1_at	BE022156		0	No Homology to Known Proteins			GGACAAAAATGTTGACATGTATCATATGACAAAAGCAAATGTTGATTAAAGAAGGATGGANNNNNNGCTCAACTTTGAACTACGATTTCATCTGGTCTGGTCCAATAGGTACAGTTTGTGTAGTTTAGCTTGTGAATAATAATTAAATTGGGAATGACCAAGCTTTGCCTTTCCTAAGGTGGATGGGTTGCCGAACCGCACTTGCTGGTCTTCTCTCTATGGGCCTGCCT
GmaAffx.60789.1.A1_at	BU547130		0	No Homology to Known Proteins			AAGAGTATTCTCAGCTCTCCTTGGAACAAGAACCTATCGCGGCGGAGCGTTGAGCAAAACAGCAGGTTACTTTCTGAGAANNNGATTCATCTGGTGAGATATTATAGAAGCATATGACTGAGATTATTTGAGAATGAAGAAGGCTTGCAGATTTGCATTATGGTTTGTGTTGTCAANNNTCATCATGATGTCCAAGCAGCATTGTTTCTTTATGTGTTTACCGACTCTCAATCTTGCCAGTCCAGTCCTCATTCTCTTTCGTGCTTGCAGCAATGTGTACTTAACAATTTGCCTGGTTATTCTAGTTGATGTTAGTCTGGTATATGTGCAGCACTTGTCTGTTTAGTGAACATTTATTTGGAGGAAAATTTTGAGAAAGTTTGCCATCTGTTGATAGTT…
GmaAffx.6633.1.A1_s_at	CD417148		0	No Homology to Known Proteins			ATTCCTGCACAGGTGAACTACTGCTTGCTTTCGGATTAACCCGTCTCACGTTTTTTGGTCTTAATGTTATTTGTGTATACTTTGGTTGGTGACCAAGCACTTGAAAAATAACCAATGTGCGTAGAATATTGTCATGTTGAACCTTTTACACTGGGTGATGTATGTATT
GmaAffx.69560.1.S1_s_at	BQ628396		0	No Homology to Known Proteins			TTGACAACTTGCACTTTCATCCCTTCTTAAAAAATGCTGCATTATTGTAGTTAATTTAATCTAATAATAATCTTTTTTTTTGCGTGTTATGTATGTTTGAAAAGGTCTATTTATGTATAATATATCGTTAAATGATCTTCCCCAAAATAAGATCAACGATTTAGTTGAGATCTGGCACCCTGTGTAGACTTTGTGGACAGGAATGAAT
GmaAffx.73383.1.A1_at	BI969909		0	No Homology to Known Proteins			TTTTCCGATGTCATTCCATCACTTCGTTGTTCTGCGTAACTTTGTGGACTGNNNATTAACACATAACACATATATCTGCCCTTTCTAACTGGATAAAGCATCCGGTTTTTTTGGGGGGTTATGTTGGAGCTACACGATGAAAATGATGACAGCAAATAAATTTTAACTATCAGACAATGTCATG
GmaAffx.77758.1.S1_x_at	BI944003		0	No Homology to Known Proteins			TGAAAAACCACCTGTTTATAAGCCTCCAGTTTATAAGCCACCCATTTACAAGCCTCCAGTGTATAAACCTCCAGTTGAAAAACCACCGGTTTACAAGCCTCCAGTTTATAAACCACCTGTTTACAAGCCTCCAGTGTATAAACCCCCAAT
GmaAffx.78753.1.S1_at	CA782920		0	No Homology to Known Proteins			CTGCCTAACCCATAATCTAACATCAACAGCATCTCTTCACCAACATGACGCGGTCAACGCTTCCACCCTCATCTCCGATCTCCCTCTTCGTGTCGCTCATGNGCGTTGNTTTCGCGTGCGCCACATCGTTGAACAAAATTGAGCACTGCGAGTTGGATTGTGCAAGTTCCACGGTGGAGGGGCTGAACGTGGTTGGTGACTGCGAACCCAAGTGTTCTCAGGGGTTGAAGATTCCGACCCAAATTGAAAAAGAAGGNCAAGACGCGATCAAAGAGTATTTGGATACCGTTTTCAGCAACGCGCTCTTTGGCGGTGGTTCAATTGAAACAGGGCAGAATAANGAAACACAAATTGAGGACAACAAGGGTGAGAAGAATGTGGATGCAGATAAATCAGCTT…
GmaAffx.80191.1.A1_at	AW349741		0	No Homology to Known Proteins			CCTCATCAGCATCAATTAATAGCATATTTTAATTACCCCAGTTGATTATTTAATTAGAGACTCTAACTAAGTATGGGCTTGTGCTTATTAAATTCTACTGACTCCTAACTTCAATAAAATAATTAAATTGTGTTATTGCTTGGGTTACAGGTTCTGAGCATGAGCAGACTGGGCGGTGCAGCTGCTGTCGCTCCCCTTGTTGCTGATATGTACTCTGAGGTTATTACTTATTACTATACAAATGCTCTTCCAT
GmaAffx.80463.2.S1_at	BG047277		0	No Homology to Known Proteins			AGCCAAGCTAAGTACGTCCTGATATGGAGAAAGAAGAAAGTGAAGAGGAAGAAGATGACAACGACTTGAATGTTATGCTGCTCTCCTTTTGAAGAGAGGAGTATCAAAAAGGCAATTCATAAAGGCTTAGGGAAGGCAAAGCCTTTCTTCCAGGTTCAATTCACGAAGCTGTGCCTGCA
GmaAffx.81102.1.S1_s_at	BE802790		0	No Homology to Known Proteins			CATTTGACCACACCACACAGTTTAAAGTAAAAAAAGAAAAAAGAAAAAAAAAAGTAATTTCTGCCTTTCTGGGATAGCTTTCTTCTGATGGGTTCTCTCTACTTGGTTCATGAAGAAAGGCATGAAACTTGACTTCGGGA
GmaAffx.83690.1.S1_at	BU964729		0	No Homology to Known Proteins			CTGCCACAAAACTCATTCATTCATTCGTTCTTGTTCGTTACAATCTATTCTCGAATGTGTATTATCCGAAAAGACTAGTACTTGGACTAGGGTCACTCTTGTCTTGTTTAGATTCCTGAACTTCCCTCCTTGTTCTTTATATTTTTTTTATCACTTTGTTCTACATATCATTTACTTCAATTACTTGATCTGTTCCTGTTCTCTGTAACTGTGTTTGGAGTGTTAAAACGTTCAGCCTAGTCAAAGATTCTTGTTTCTGCTGTAGCTTTATTTAGTAGCTAAGCACCTCAGAAACCAGATCTCTGTAGAAAGTAAAGTTTTTTTTTTGGTTCGAATTCTATTCTTTGTTGT
GmaAffx.86185.1.S1_at	CA803005		0	No Homology to Known Proteins			GTCTTCCACAATGACGATGCTGTTTGGGGGAAGCAATATCCTTTGCCGTGTCGCCTTTTGGTGGAATGCCCTCTTCCATGACAACGTCATTTGGTGCAACGCCCTCAGTTAAAGCAGGAGGAGGAGTCATGGTCGGAGACNTTGAGCACGGANAGTANGAGCATGTGAGTGGGCTTCAGTGGGACCATGAGCAGCCCANNAGCAGGAAGAAGAGTGCAAAGTCTGAATTATGGCAAGACTTTGTTTTTAGTAATTNATATCAGCTTGGAGGTGACTTTATGGGGGAGTTATAGTAATACTGATTGTTGATGTCTTTTTGTTGACCTTCTTGAATGAGTTTGTGTTTTTAATTGTTTAAAAAAACAATTTATTGCAAGAAAAATGCTCTAGAAACATGAG…
GmaAffx.89678.1.S1_s_at	CK606714		0	No Homology to Known Proteins			TTTTCTGCTCTTTGAAGAAAGAAGGGTCTTTGCTTGATTTTGGAGATGTCTCTGCTCTCAGATCTCATCAACCTTAACCTCTCCGATACCACCGAGAAG
GmaAffx.90360.1.S1_at	CF806085		0	No Homology to Known Proteins			AATTCCAATCTTTATGCTTTGAGGATGTGTTAGTATTTCTCATGTACTTATAAATTTTAATCCCAACACACTTTCTATGGTTTGCTTTCTTCTTGTTTGAATTTCCTCTGGGGTCTTATAGCAAATTAAGAGTAGTAAAAGGTCATATATATACCCATAATAAGGCTTCTGCAGACTGCAATTTGCACTGGTAGTATAACAAAAAGTGTATAAATTGAGCCACCCGTTAGATTCTATATGCCGGATTAATGGTATCTTTAGTTT
GmaAffx.90401.1.S1_x_at	CF806126		0	No Homology to Known Proteins			TGAAACTTGACGAGAGCGAAGACGAAAAGAAAAAGAAGGAAGAATTGAAGGAGAAATTTGAGGGTCTCTGCCATGTGATCAAGGATGTGTTGGGT
GmaAffx.91839.1.S1_s_at	CF807564		0	No Homology to Known Proteins			GTCCAGGCTATACCAATTGGAAACGTGCGAGAGCTATATTCACAATATTCTTGCTTTTCAAGTTCTAAACAAATACTCGTGAAATATTGTAAAAATTTGTATTTGTTGATTTTGCTGTCCGCGGCATGAGTAGGGTATAGCATGTATTAAATCCCGCTGCGCTCAGTGGCATTTGTATTT
GmaAffx.92888.1.S1_at	CF808613		0	No Homology to Known Proteins			GTTGCAAGCAGAAAAGACCAGTTTGTATCAGCAAGAGAAAAAATGGTGTGGGGACTCAAAGAAGGACAAGAGGACGTCCTTTGTAATCAGCTTAGCACCTTGGAACGGTCTAAACTCTAAAGTGTGTCCCCAAATATAGTAGTAGTTACGACTTTGCCTCGCATGTAGGTACTCTACTCGTTTACAT
GmaAffx.93333.1.S1_s_at	CF809058		0	No Homology to Known Proteins			TCTCGCTAAATTACAATTCCCTTTCTTTTTCCTCTCCNACTTCTCCTTCTCCGTTTCTCCGAACATGTAAATTCGGAGGACACCGTCTTTGATTCGGTCTATTTTTTTGGGGGTTACTTTACTTCGGTTACGCGTCGTCGTTTTGCTTTTCTTTGTCGTCGTTTTTGCGTTGCGTTGATTGCTGAGAAAGAA
GmaAffx.23371.1.S1_at	AW307070	At3g61860	9e-24	Post-Transcription			GAGAGATCACCCAGTCCTTATCACAGGCGACCAAGTCCTGACTATGGTCGTCCACGCAGCCCTGTCTATGATAGGTACAATGGTGGTGGACCAGACAGGCGGAGGAGTCCTGATTATGGCAGGCACAGAAGTCCTGATTATGGCAGGCGCAGGAGTCCTGATTATGGAAGGCGCAAGAGTCCTGATTATGGGAAACCCAGGAGTCCTGAATATGGTAGATATCGCAGCCGTTCGCCGGTGCGAAGGTCAAGAACATAGGTGATCTCAGGTTTTAGGGTAAGACGGAAGGCTTCAGTGGCACTGTTACTTTCTAGTTGTTAGAATAGCATGTGGTATATTGTAGTAAACGGTACTTCTCAGTTTAATGTGGTTTGCGTATTTGCTGTTTAGCAGTCAGTG…
Gma.2711.1.S1_at	BU545471	At5g11200	6e-21	Post-Transcription			TATACGCTTTTCTTTTCCTAGCATGTGGTTGTATGTTTGCATGCTTGTAATTTGCCTCTCACCTTTGTACCCTACATCTCTTAATTAACATGGGAATTGATAGGTGGGAAGAGCTGGTAGATTTGGCACGAAGGGTCTTGCAATTACTTTTGTGTCTTCTACTGCTGACTCTGAGGTTCTTAATCAGGTGCAATCTAGGTTTGAGGTTGACATAAAGGAGCTTCCTGAACAAATTGACACTTCGACATATATGCCAAACTGATGACGTTTTGGAACTATTAGGAGGCAGATCTTGAAGAATCTTTTGCGGATTGCGGAATGGTTTAGTTGGCATCTCATCAA
Gma.2711.2.S1_x_at	CF920566	At5g11200	0	Post-Transcription			TGACATGCCTGATTCTGCTGATACTTACTTGCACAGGGTGGGAAGAGCTGGCAGATTTGGCACGAAGGGNCTTGCAATTACTTTNGTGTCNTCTACTGCTGACTCTGAGGTTCTTAATCAGGTGCAATCTANNNNNNNNGNNNNNNANANANNNNNNCTTCCTGAACAAATTGACNNNTNNNNNNNNNNNNCNNAACTGATGACGNTTTGGAACTATTAGGAGGCAGATCT
GmaAffx.92769.1.S1_s_at	CF808494	At3g19760	1e-124	Post-Transcription			ATGTGTATAGATATCTCCCACCCGACCTTCAGGTTTGCTTGATTTCTGCTACCCTTCCTCATGAAATACTGGAGATGACAAACAAATTCATGACAGATCCAGTAAGGATCCTTGTAAAACGTGATGAATTGACATTGGAGGGCATCAAACAATTTTTTGTTGCCGTTGAAAGGGAGGAATGGAAGTTTGATACCCTGTGTGATCTTTATGATACCCTCACTATCACTCAAGCTGTTATATTCTGTAACACTAAGCGAAAGGTGGACTGGTTAACTGAAAAAATGCGTAACAATAATTTCACTGTCTCATCAATGCATGGTGACATGCCTCAGAAAGAAAGAGATGCTATTATGGGAGAATTTCGTGCTGGAACAACCCGTGTACTAATAACAACTGATG…
GmaAffx.82078.1.S1_at	BI424683	At3g26420	4e-41	Post-Transcription			TACTCTTCCACTCTTCGTTTAAAATGTCTGACGTGGAAGAGTATCGTTGTTTCATTGGTGGCCTTGCGTGGTCAACATCTGATAGAAAGTTAAAGGATACGTTTGAAAAGTTTGGCAAGCTTATTGAGGCAAAGGTGGTTGTTGACAAGTTCTCTGGGCGTTCTCGTGGTTTTGGATTTGTCACATTTGATGACAAGAAAGCAATGGACGAGGCTATTGATGCTATGAATGGGATNGATTTAGACGGGCGAACTATTACTGTTGATAGAGCTCAGCCTCAACAAGGATCAACTAGAG
Gma.17650.2.S1_at	BE607734	At2g21660	2e-12	Post-Transcription			GAGGTGGACTATAGTTGCTCTAGTTTGGGGATGAAAATTACTTTGCTCATTTGCCTGTTCCTCTTGGTTTGAATAAATTATATTTACTTTTGTTATTANNNNNNNANNNNAAAAANNNNNNNNNNNNNNNNNNNNCNNNNNNNTCCNNANNTTCTAGGGTTTTATTCATTTTCCGATGGCTTCTGCAGATGTTGAGTACCGTTGCTTTGTCGGTGGGCTCGCTTGGGCCACTGACGACCATGCCCTCGAGAGAGCCTTCTCTCAGTACGGCGAAATCGTTGAAACGAAGGTCTGTTTGTTGCAGGCATCACATCTGATCTCACACGATTCGGATTCGGAATTTTCTCGATCCCGTTCTGATCTGTGATCTCTGATCTGTTTGCGTTACTTGATCTTATG…
GmaAffx.62742.1.S1_at	BE556052	At1g29400	9e-23	Post-Transcription			GGAGCAGCTTTTCAGCATTCTATATCCTTTCCTGAGCAAAATGTAAAGGCAAGTCCTAGGCCTATATCTACTTTTGGTGAATCAAGTTCTAGTNCNNNAAGTATTGGAACACTGTCCGGTCCTCAATTTCTTTGGGGAAGCCCAACTCCTTACTCTGAGCATTCAAACACTTCTGCCTGGTCTTCATCTTCGGTGGGGCTTCCATTTACATCTAGTGTCCAAAGGCAGGGTTTCCCATATACTAGTAATCACAGTCCTTTTCTTGGCTCCCACTCTCATCATCATGTTGGATCTGCTCCATCTGGCCTTCCGCTTGATAGGCATTTTAGCTACTTCCCTGAGTCACCTGAAGCTTCTCTCATGAGCCCGGTTGCATTTGGGAATTTAAATCACGGTGAT…
GmaAffx.9084.1.S1_at	BI784529	At5g46250	5e-22	Post-Transcription			GAATCATGGCTCTAATGATCATCATGAAGATACCCATGAGGAAGAAGATGGGGATCATTTGTCAAAGGATAAGGGTGGGCAGAGGTATAGAAATCAAGGAAGATCAAGAAAACATAAATATCGTGCTGGAAATGGAATGGGCCATGGAAGTGCACCATCAACTCATGCTGCTGAAGCATCAAAGTCACCTCCTGGACCCAGAATGCCAGATGGAACACGTGGCTTCGCAGTTGGACGAGGTCGGCCTCCTGTCCCTGCTTCGAATTAGCAAGATTTGACACAACACGAGGGATTGTATTTAGCAGTATTATGTGGTCCGATGTTTTAGTGATGGTACTAGTTTTAATCTGGGTCCCTATGCGTGTTCGGTTGAGTCAACATGGGTTTGTTGGACTGTTA…
Gma.13169.1.S1_at	BU084294	At3g01150	1e-128	Post-Transcription			GTTTTCTGCTTTTGGCTTTGTTCACAAAATTGCTACATTCGAAAAGACTGCAGGTTTNCNNGCTCTGATTCAGTTCACTGATGCTGAGACCGCTTCTTCAGCTAGGGATGCACTGGATGGAAGAAGTATACCAAGATACCTGCTTCCAGCCCATGTTGGTTCTTGTAACTTGCGAATTTCATATTCCGCACATAAAGATCTGAATATCAAATTTCAGTCAAATCGCAGCAGGGACTACACAAATCCCATGCTTCCTGTTAATTATACTGCTATTGAGGGGGCAGTACAGACTGCTGTAGGCCCTGATGGGAAGAGGAAAGAACCTGACAGCAATGTGCTTTTGGCTTCCATTGAAAATATGCAGTATGCTGTTACTGTTGATGTCCTCCACACGGTGTT…
GmaAffx.91415.1.S1_at	CF807140	At2g23930	1e-36	Post-Transcription			ATTTTCTTCGTTCGTCCTTCTGTGATCTCTTCTTCCAC
GmaAffx.72797.1.S1_s_at	AI966445	At3g55220	4e-12	Post-Transcription			TGATGAATTGGACAGAACCCCTGGAGAGATACTGAAAAAACTTGAGGAAGTGCGAAATAAGATTATTTAAGAAATGGTAGCCTGAGAGGTCATAGTGGAAATGTGTTTTTTCTGGTAGGCCATTTGCCCGCAGTTAGGTCACTACTAACAAAGTGAAGCCAACTTGCGTATCTCTCATTCATACGGGAACGGTGATTTCTTGTCCTATTTAATTCAAGCGGGGAGAAGGACCATACGGTCGGTGACTTTGTACTCTAGTGAAGTGAGACCCATAAGCCCCAGTTGGCAATTTATGTTGTAATTACTATTTAGTTGCAATTAGCTGTAATCACCCTTTTTCTTGTACTCAA
GmaAffx.56431.1.S1_at	BU761499	At5g42820	1e-55	Post-Transcription			CCCTAACCCTAACGGAGAGATGGCGGAGCACTTGGCATCGATATTCGGGACGGAGAAGGACAGGGTGAACTGTCCGTTCTACTTCAAGATCGGCGCGTGCAGGCACGGCGACCGGTGCTCCCGGCTTCACACNAAGCCNACAATTAGCCCAACNTTGGTTCTGTCGAACATGTACCAGAGGCCCGACATGAACATGANCATNATCACCAACCCCGATCAGCCNCANCCCCAATCNCTNGACCCCGANAAGGTNCAGGATCACTTCGACGACTTCTACGAAGATCTCTTNGAGGAGCTNAGCAAGTACGGCCCCATTCAGAGCTTGAATAT
GmaAffx.92737.1.S1_x_at	CF808462	At3g11910	1e-15	Protein Destination & Storage			CTGACATTGTGTCCAGTCGTTTTCAGAGGAGAGATGTTTATGGTGCTTGGGAGCAATATCTTGGT
Gma.12494.1.S1_at	BG839922	At3g60080	3e-14	Protein Destination & Storage	Ubiquitin Degradation	E3 Ubiquitin Ligase	ATTCGGCTTGCTGATAACGACGTTTACAATAAGGTATATAGTTTATTAAATAATGTTGAAGTTGTATCACCATAGATCGTCTTATCAAGTGTAAATCTGCACCGACGATTATGCTGCTTTTGTTCTTTTCCCTCCTTTTTTGGGAATCTCCAACTAGCTAGTTGTAGTGCTATAGCCAAAAATACAATAAATTTGATGGAGTGCACGAGTAATGTGCATTTCTCCTCCATCTTCCACTCTCTCTATGTTGGTCACTTGGTCTTGGAACTGGATTTCCTTACCCAAATTTCCCTTCCAATTTAGGCAATAAAATCTTGTGTAAAACTTGGCTTTCTTTTGTGCTGTGTCTGAATTGTCCAAGTGGATGATGGATCCTTCCCACTGAATCATTTTGTTCAC…
GmaAffx.11295.1.S1_at	BM891668	At4g03510	4e-41	Protein Destination & Storage	Ubiquitin Degradation		ATTTCTCACGTTTATCATCGCCATTATCCGAATCANCCTCAACAANTCAACTNAATTCCTGGCAGTTACACTTCAATGTTCAACACAGGTGGTTCACTAGCAAATGCNTTTGATACAACATATGGAGTCTTTGGTGAGATGATATATGCAAGGGTCTTTGGGAACCAGATGACTAACACATATACATACCCGAATTCTTATGATCTTTCAAGGAACAGTAATCCNAGGATCAGAAGGCATTTAATGCAAGTTGATAGNTCACTCAATAGAATCACTTTTTTCCTCCTTTGTTGCATNGTTTTGTGCCTTCTCTTATTCTGACTGCTATTGCATANNTTTTGTGCAATACATCCCTNTATAGAATACAAGCATTATGCGGATTCTGCCAGATGCATCATA…
Gma.3587.1.S1_at	CD392269	At2g47470	1e-137	Protein Destination & Storage			GGCACCGGCTACTTCATCGAGAAAACCATGCCCGAAGGAAAAGATTACTGCGACCGCAAAATCAACTTGCTCAAATCTAACTTTGATCAACTCGTCGAGGTTGCATCCAAAAAGAAAAATGTGGCAGATGAAGCTGGTGTTATTTTGCAGGCAAAATTGAAGCAGTTAGCGTCTTCATCCTAAAAGTAGTTGGTATAGAATTTATTTGTTTTCTTTCAATGCATTGTACCATAGAACTATTTAAACTTTTTATTTGAAAACTCCCTTTTTGTTGGCACCTCCAAAATTTGGCTTGGAACTATTGGATGTGTATTTAGAAAATGGAGTCAAATCAATGACNATTGAAATTTAGAGGGTATTTAGGAATTTTACACTGGTGTTTCAAGTACATTATCTCTT…
Gma.5649.2.S1_a_at	BI785611	At2g47470	1e-137	Protein Destination & Storage			AGAAAGCTTGGATGTCTTGGTAAAGGAGTTTGTAGCTGCCAGCGATGAAGAGAAGAAATCCGTGTTTACCCGATTGGAAGAGGAAGTTGTGAAGCTTAAGGGTTCCGCCTCAAGGTACGGGAAGATTTACTTGAAAGCTGCCAAGAATTACNNGGAAAAAGGTTCTGATTATGCTAAGAACGAAA
GmaAffx.78527.2.S1_s_at	BM093896	At4g22670	3e-21	Protein Destination & Storage			GTGCTGAAGCTCAGGCTGCCTATGAGAAGGCTAAGAAGCAAGAGCAATCATCTTCCAGTAGAAATCCTGGAGGCATGCCTGGTGGGTTTCCTGGGGGCTTCCCAGGGGCCGGGGGCATGCCAGGGGGCTTCCCAGGGGCCGGGGGCATGCCTGGGGGCTTCCCAGGGGCTGGGGGCATGCCTGGGGGATTCCCANGGGCTGGTGGCATGCCTGGGGGATTCCCAGGGGCTGGTGGCATGCCTGGAAACATTGATTTTAGCAAAATCTTGAGTGACCCTGAACTGATGGCGTCATTTGGTGATCCAGAGATTATGGCTGCTCTTCAAGATGTTATGAAGAACCCTGCTAATTTTGCCAAGCACCAATCAAATCCAAAGGTAGCTCCTGTAATTGCGAAAA…
Gma.15565.1.S1_at	BG155315	At4g10570	9e-89	Protein Destination & Storage			GGGAGACATCTCAGGTTCATACAGTATAGATCATGATGGGGCATTTTGTTGCTTGATGCCTATTTTACATGCTTAGCAGTTAGCACNANGCGGAGCTTTTGTCCTGGATAGTTATTTTACTTCGCAGTGCAAGACTGCCAGGTAAAATATGAGACAAAATGTTCCGGTAGTGAAAAGAGCAATTAAACAAAAATGTTTAGGTGAGGCTCTNGTNAGTTTTCAGTTCTTAATCACTACATGAATGATATCATTTTTTGATAGAGAAATTTTGGCAGTCTATGAACTTNAGATATTTCTGTTATTTCATTTCATTGGAGGTTAAAACANNNCATCATGAATTCACCATAATTGCTGTTTGACAGTTGTATGTATTGGTGTCGTGCTAATAGGGCGACGCTT…
Gma.3757.1.S1_at	CD405183	At3g46460	5e-66	Protein Destination & Storage			GTATCATATCGATGCTTTCTAGTCCTAATGATGAATCTCCTGCAAATGTTGAAGCTGCGAAGGAGTGGAGAGATAGGAGAGATGAATTCAAGAAGAAGGTTAGCCGATGTGTGCGGAAGTCACAAGAAATGTTGTGATTTACAGCTTGGATTCTCATCTTCCTTTTGTGAACNGAAGGATATACAACTTAATGTGTGGATTGGTTCACCTGTTACTGTTGANCCNAGTANANTGCCATTTGTCTTGGAAAAACNAANTGTATTNTAAGTGCTTGGTNANTNNTTNNTGACTAGTTNANTTGGAAATTTAGTTGTTCATTTGCATG
Gma.8301.1.S1_a_at	CD401870	At1g23260	4e-71	Protein Destination & Storage			CAATCCTCCATCTGTTAGATTTCAAACAAGGATTAACATGACATGTGTCAATCAAGAAACTGGAGCGGTTGAGCCACATTTGTTTCCTATGCTTGCTAATTGGAAACGTGAGCATACAATGGAAGACGTTTTGATTCAATTGAAGAGAGAAATGATGTCTCCTCAAAATAGGAAGCTAACTCAGCCTCCTGAAGGCAATGAAGAAGCCAGGGTTGATCAAAAGGGCCTGGTGGTGAGATGTTGTATTGTGTAATTCCATGGAGAATCCAAGCATAATAATAATAATAATAATAATAATAATNNNNNNGTAAATAACTATATTCAATAGATGATCCAAGTTCACGGACTTATGCATAATGCATTTATAATGTAATTATGGACCACTTCCGTATGTTACCT…
GmaAffx.92543.1.S1_at	CF807651	At3g57870	1e-85	Protein Destination & Storage			GAGCTGAGGAGAATCAATCGAGAGAAATATGTCTGGTATCGCTCGTGGACGCCTTGCTGAGGAACGAAAGTCATGGCGCAAAAACCATCCACACGGTTTCGTTGCCAAG
GmaAffx.92543.1.S1_s_at	CF807651	At3g57870	1e-85	Protein Destination & Storage			GGTTTCGTTGCCAAGCCCGAGACTCTACCTNATGGCACCGTAAATTTGATGGTCTGGCATTGCACTATTCCTGGCAAGACCGGGACTGATTGGGAGGGTGGATATTTCCCACTGACAATGCACTTCAGTGAAGATTACCCTAGCAAGCCTCCCAAGTGCAAATTCCCTCAAGGTTTCTTTCACCCTAATGTGTATCCATCTGGAACTGTTTGCTTGTCTATACTTAATGAAGATAGTGGGTGGAGACCAGCTATAACAGTGAAGCAAATTCTTGTGGGCATCCAAGACCTGCTTGATCAACCAAATCCTGCTGACCCTGCCCAGACGGAGGGTTATCATCTATTCATCCAGGATGCAGCTGAGTACAAGAGAAGAGTCCGACAGCAGTCAAAGCAATAT…
Gma.5625.2.S1_a_at	CD409862	At5g50870	6e-46	Protein Destination & Storage			TTCTGTGCAAGCACTTCTCTCTGCTCCNCAGCCTGATGATCCTCAAGATGCCGTGGTGGCACAGCAGTATCTGAAAGACTATCAGACATTTGTTAACACTGCTCGCTACTGGACAGAAAGTTTTGCCAAGGNNTCGTCTCGNGGGATTGAAGANAAGGTACAGAAACTCGTTGAGATGGGATTTCCA
GmaAffx.79104.1.S1_at	BM523175	At4g32940	2e-47	Protein Destination & Storage			TCCAACCTACCCTTATTCTTCTTCTTCAATTTCACACCCATCATGGACCGTTTTCCGATCCTCTTTCTCNTCGCCACCCTCATCACCCTCGCCTCCGGTGCCCGCCACGATATTCTCCGGTTACCCTCCGAAGCNTCCANNTTNTTCAAAGCACCNGNTNNNGNCGATCAAAACGATGAGGGCACNAGGTGGGCCGTTTTANTTGCCGGTTCCAATGGCTACTGGAATTACAGGCACCAGTCTGATGTTTGCCATGCNTATCAACTACTGAGGAAAGGTGGTNTNAAAGANGAAAATATTGTTGTATTTATGTATGATGACATTGCTTTCAANGAAGAGAACCCNCGNCCTGGAGTCATTATTAACAGTCCACANGGAAATGATGTTTACAAGGGAGTN…
GmaAffx.33959.1.A1_at	CD390737	At1g24510	1e-12	Protein Destination & Storage			AAAGCAGCAACAGCTTTTACTTGCTACTCAAGTTGTCAAGATGATACTGAAAATCGATGATGTCATTTCCCCATATGAGTACTGATATTTGTAAACTCAGTCATGTTATACGTCAAGATGCTGAATTGGTGATAGTATTTTGTTTCA
GmaAffx.21384.1.S1_at	BQ453940	At1g03950	4e-70	Protein Destination & Storage			GACAAACCAGGTGCTCGATGAAATTGGTGTAGATGTTGCCTCACAGTTATCAGCAGCTCCCAAAGGGAGAGTCGCAACAAAGAATGCTGAAAATGATAGCAGCTCGGGCATTGAAGAACTTGAGAAGCGTTTGGCGGCTCTTAGAAACCCGTAAATTTTGCTTGGGATTATGTGATTCTGGAACTCATTGTTNNAAACTAAAATTCTTTCCTGAGCNTATGTNNNCTTGGGATTTNNNNAGTNNAGTGTGTATATACTTCCTTGAAATTA
GmaAffx.74451.1.A1_at	BU548027	At3g10410	2e-57	Protein Destination & Storage			AGCACTGAAGTTTATGCGGCTATGTTGGTGGATTGGATGAGGAATCTTGAAGTTGGTATTCCTGACCTTCTTGAGGACGGAATCAATTTGCNNNTTTATGCTGGGGAATATGATCTAATCTGCAACTGGCTTGGTAATTCAAGATGGGTTCATGCCATGGAATGGTCTGGTCAGAAAGAGTTTGCAACCTCACTTGAAGTTCCTTTTGTTGTTGATGGATCAGAAGCCGGATTACTGAAGAGCTATGGACCTCTAAGTTTCCTT
Gma.9705.1.S1_s_at	CD394600	At3g45010	2e-94	Protein Destination & Storage			CAAGGTGCTTGTGTATGCTGGAGAAGAAGATCTCATATGCAACTGGCTCGGGAATTCAAGGTGGGTTAATGCAATGGAGTGGTCTGGTCAAAAACAATTTGGGGCGTCTGGTACAGTCCCATTTTTAGTTGATGGTGCAGAAGCAGGAACGCTGAAAAGCCATGGACCTCTCTCTTTCCTCAAGGTATACGAGGCTGGTCACATGGTCCCTATGGATCAACCAAAAGCTGCACTTGAGATGCTAAGAAGCTGGATGCAAGGGAAACTGACAATGACAAAGAGTGGAGATAATGTCTCTCCTAAATGATGCACTCACAGCACAAAAACCAA
GmaAffx.91810.1.S1_s_at	CF807535	At5g58710	7e-80	Protein Destination & Storage			TCGTATTGTGATGGGTCTTTTTGGAAAGGCTGTTCCAAAAACTGCAGAAAACTTTCGAGCTCTTTGCACTGGGGAAAA
Gma.16812.1.S1_s_at	AF007211.1	At2g38380	1e-105	Protein Destination & Storage			AATTTTGACCCTGTCACTCCTGATAAAATTGACAGGGTCTACTTCTCCAATCTTCAGGTTAAGAAGGGCTTGCTTCAGAGTGATCAAGAGCTGTTCTCGACACCTGGTGCCGATACCATCCCCATTGTCAACAGGTTCAGCAGTGACCAGAAAGTTTTCTTTGACGCCTTTGAGGCTTCAATGATTAAGATGGGTAACATTGGTGTGCTCACTGG
Gma.16812.1.S1_x_at	AF007211.1	At2g38380	1e-105	Protein Destination & Storage			CAATGGTGGACCTAACAACCTTGTCAATTTTGACCCTGTCACTCCTGATAAAATTGACAGGGTCTACTTCTCCAATCTTCAGGTTAAGAAGGGCTTGCTTCAGAGTGATCAAGAGCTGTTCTCGACACCTGGTGCCGATACCATCCCCATTGTCAACAGGTTCAGCAGTGACCAGAAAGTTTTCTTTGACGCCTTTGAGGCTTCAATGATTAAGATGGGTAACATTGGTGTGCTCACTGGGAAGAAAGGAGAAATCAGAAAACATTGTAACTTTGTTAACAAGAAATCTGTTGAAGTTGATATTGCTAGTGTGGCCTCAGAAGAATCATCAACAGAGGGTATGGTTACCTCAATC
GmaAffx.89654.1.A1_s_at	CK606070	At1g77510	9e-23	Protein Destination & Storage			GCAAAACTGGATGCAACTGCCAACGATATCCCAAGTGAAACCTTTGATGTCCAAGGTTATC
Gma.2534.3.S1_x_at	AI443822	At4g05320	2e-81	Protein Destination & Storage			TTAGTTCATTCTCTTTGCGCAGTTCCCTACCTCTCCTTTCAAGATGCAGATCTTCGTCAAGACCCTCACCGGAAAGACCATCACCCTTGAGGTGGAAAGCTCTGACACCATCGACAACGTCAAGGCCAAGATCCAGGACAAGGAAGGAATTCCCCCGGATCAGCAACGTCTCATCTTCGCCGGAAAGCAGCTCGAGGACGGCCGTACCCTCGCCGACTACAACATCCAGAAGGAGTCAACCCTTCACCTTGTCCTTCGTCTCCGTGGTGGCATGCAGATCTTCGTCAAGACTCTCACTGGCAAAACCATAACCCTAGAGGTCGAAAGCTCTGACACCATTGACAACGTCAAGGCCAAGATCCAGGACAAGGAGGGAATCCCCCCAGACCAGCAACGTCT…
Gma.18065.1.S1_at	BG508842		1e-145	Protein Destination & Storage			TCAAGGATATATTTTTCCCCGTCGACGGGGAGAAACTCCTGACTCTGAAGCTCAGCTTCTGACTATTCAGTTTGAATGGAATGGTGTCCTAAAATCTGTATCCAGCACTTTGGTTGGAGTGAGCCCTGAATTTGAAATTGCTTTGTATACCCTGTGTTTCTATGTTGGTAGGGAGGATAACCACATTCAGCTTGGTCCATATGGGGTTAATATCAAGTGCTATCGATTGGGTGATCGAATTGGATCTGTTTTCCCCATTGCAGATTCTTGAATTTTCAGTTTCCAGCATTGGTAGTAGTTGTTCCCTATGAAATCGTTTGTTATGCATACTTGAGAACTTGTAACTCATGGGTGTAAAGGCAACAATACCAATTAGATCAAGTAGTACAAGGTAGCACA…
GmaAffx.50688.1.S1_at	BI972174	At1g67930	2e-77	Protein Destination & Storage			TTTTTGGCTCATTGCTTGAGTCGCCTTTCAGATCTAGTGAATTCTGTATTTCCAATGTCCAGTCGTGGTAGTGTTCCCTCCAAGGAACAAATATCAAGAATTATATCACGCATTCAGGAAGAGATAGAAACTGTTCAGATGGATGCACGCTTAACTCTTCTTGTTTTGCGTGAAATTGGCAAGGTTTTAATTCTTCTTGCAGAACGAGCTGAATACCAGATATCCACTGGTCCTGAATCACGTCAAGTAAATGGTCCTGCAACACCAGCACAGCTCAAGAACTTTACATTGTGTCAGCATCTGCAAGATGTTCATACACGGATATCATCTATACTTAAAGGAATGCCCAGTATTGCTGCAGATGTGTTGTCTGCTTCATTAGGTGTCATATATGGTGTT…
Gma.4983.1.S1_at	BG156786	At4g33210	1e-101	Protein Destination & Storage			AAACCTTTCTCTATCAGCTAATTTGAAGGAAGTTGATGTAGCTTGTCTCAACCTAAGCTGGCTTAATCTAAGCAATTGTTCCTCTTTGGAAGTTTTGAAGCTAGAGTGNCCNGAGATTGACCAGTCTNTTCCTTCAGTCTTGCAACATTNATGAGGAAGCTGTTGAGGCTGCTATATCAAAATGCACTATGCTGGAGACTCTTGATGTTCGCTTCTGTCCAAAGATANGCTCAATGAGCATGGGAAGATTNCGTGCAGCATGTTCTAGTTTGAAGCGTATATTCAGCAGCTTGTCANCTTCATAAACNTGNNCANGGATCTGTGAAATTTTCCAGTGGTTTTCACTTGGANTGAAGNCANACTTGGTAATAAATCTGGTTATATCCTTATGTATTG
Gma.13350.1.S1_s_at	AW570594	At5g42020	0	Protein Destination & Storage			GATGTGGCTCCCCTCACTCTCGGAATTGAAACTGTTGGTGGAGTCATGACAAAGTTGATTCCCAGAAACACTGTTATCCCGACCAAGAAATCTCAAGTGTTCACCACCTACCAGGACCAGCAGACTACCGTCTCCATTCAGGTTTTCGAAGGTGAGAGGAGTCTCACAAAGGATTGTCGCCTTCTTGGGAAATTTGATCTGTCT
Gma.13350.1.S1_x_at	AW570594	At5g42020	0	Protein Destination & Storage			TCCCCTCACTCTCGGAATTGAAACTGTTGGTGGAGTCATGACAAAGTTGATTCCCAGAAACACTGTTATCCCGACCAAGAAATCTCAAGTGTTCACCACCTACCAGGACCAGCAGACTACCGTCTCCATTCAGGTTTTCGAAGGTGAGAGGAGTCTCACAAAGGATTGTCGCCTTCTTGGGAAATTTGATCTGTCTGGAATTCCACCAGCTCCAAGGGGCACCCCTCAAATTGAAGTGACCTTCGAAGTTGATGCCAACGGCATTCTAAATGTGAAGGCAGAAGACAAGGGAACTGGTAAATCAGAAAAGATCACCATTACAAACG
Gma.4910.1.S1_at	BE822863	At3g02090	1e-103	Protein Destination & Storage			GTTTGGATGACTTAAGCTATGCAATAATGTACGAGACAACCAAGTTGGCTTATCGGGTTTCAGAAGATGATGTCACACGTGCTTGTANNCAGTTGAAATCTTCACTCCTGCTCCACATAGATGGAACAAGTCCAGTAGCTGAAGATATTGGGCGTCAGCTACTCACCTACGGCAGAAGAATCCCATTTGCAGAATTGTTTGCTAGAATTGACGCTGTTGATGCAAGCACAATAAAACGTGTTGCTAACCGATTTATTTATGACAAGGATATTGCAATTGCTGCTATGGGACCTATTCAGCGTTTGCCTGATTACAACTGGTTCAGGCGCAGAACCTACTGGAACCGCTACTAGTTTTCATCGATATTTTTTTATGCTTCATCTCAATTTCATGGAGAAT…
Gma.18061.1.S1_at	CD393031	At2g24200	1e-137	Protein Destination & Storage			ACACCAAGTGATGACCTGGCAAAAGAAGTTTTTGATGCTTCTGAAGCGAGTGGGGAGAAACTATGGAGGTTGCCGTTAGAAGAAAGTTACTGGGAGTCAATGAAATCAGGAGTAGCTGATATGGTGAACACTGGTGGTCGACCAGGTAGTGCTATTACTGCGGCTCTTTTCTTAAAGCAGTTTGTTGACGAGAAGGTTCAATGGATGCATATTGACATGGCTGGTCCGGTGTGGAATGAAAAGCAGCGCTGTGCAACAGGATTTGGTGTTGCTACTTTGGTGGAATGGGTTTTGAGGAACGCATCTTAAATGCGAACTGAAATGAAATCTTGTTCAATTGTAGTGTGATATATATACTAATAACTTATCTGAAGGGATATAAAAGGTGTGTGCCCCGAG…
Gma.1840.1.S1_at	BI967178	At4g39150	4e-98	Protein Destination & Storage			GTCATCTGTTCAGTTTGTCTGATATGGTTATGTATTGAGTAGTATTCTTATGACCTTCTGGCTCTCAGTGGATTCTGAACATTGTTTCTTACAGTGCTGTTAGTAGGCATTGTATGTCATTTCACTTGGACTAACCTGCCATAATTACACGCGTTTGTACTT
GmaAffx.91690.1.S1_s_at	CF807415	At2g23070	1e-172	Protein Destination & Storage			TTGCTGGGATGATATTCCGTAAGGAGCCATTCTTTTATGGACATGATAACTATGATCAACTGGTCAAAATAGCTAAGGTACTTGGGACAGANGNATTAAGTGNATATTTAGATAAGTATCGAATAGAGTTGGACCCNCATCTTGCAGCACTTATCGGGAGGCATAGCCGCAAGCCATGGGCNAAGTTCATTAATGTAGAANATCATCACNTGGCTGTTCCTGAGGCCGTTGACTTTGTTGACAAGTTATTACGCTATGATCACCAAGAACGTCCTACTGCAAAAGAAGCCATGGCCCATCCATACTTCAATCCAGTTAGAAATGCAGAAAG
Gma.15087.1.S1_at	BI968833	At4g28880	0.0001	Protein Destination & Storage			AATATACCCTCTACTTCATTTTCTCCTGCTAGTACTTCAAAAAGGAACTCCTTAAAGCAATCCTTGTCTGCTGAAGCTTCCAACCCTGGACATGCACAAGGCAGTAAAATNGGCCCTTCAAGTAGCTNGATGTCATCTCTGCAGCGCATGTCTTCTGCTAAATGATTGCNAAATATGCTATGAAGCTTTGAAGAAGATTCTGTGCATNNTTTCCCNNANTNTTTGGTCAAGAATATTCAAGTCATTNNTANTTCATGGAGACTGCAAATGTGCTAGAAAATTAACANATTGCATAGCTCCTATTTTGAGGCCATTTAGTGTTGCTTCTTTCCTGAGGTGACTACAAATGNTTGTGCGGTATAAAACAGACTTCCCANGCTTGGCTCCTGTNCTGTACAT…
Gma.10357.1.S1_at	CD409912	At3g03960	1e-123	Protein Destination & Storage			AGACAGGGTTGGATCAGTATGCTATNGCAAAATTTGCTGAAAGTTTTGAAATGATTCCTAGAACTTTGGCTGAGAATGCTGGNNTNAATGCAATGGAGATCATATCTTCTCTGTATGCAGAACATGCATCTGGAAATGCCAAAGTTGGCATTGATTTGGAAGAAGGCNTATGNAAGGATGTCTCAACCTTGAGCATTTGGGATCTCCATGTGACTAAGTTATTTGCTCTTAAATATGCTGCAGATGCTGCATGCACTGTACTACGTGTGGACCAGATTATTATGGCAAAACCAGCTGGTGGTCCAA
Gma.3421.1.S1_at	AW395207	At5g50920	0	Protein Destination & Storage			TAGTTATGGAGCTAGACCTCTAAGAAGAGCCATAATGCGACTTTTGGAGGACAGCATGGCTGAGAAGATGCTTGCCAGAGAGATCAAGGAGGGCGACTCTGTTATAGTGGATGTTGATTCTGATGGTAATGTGATTGTGCTCAATGGTAGCAGCGGAGCCCCNGAATCCTTGCCAGAGACGCTTCCTGTATAATGCGGTTAATTTGCTAATACTATGTACTTAATTTGTTTAAACCATAGTCATAGTATGTTTTACTTGTCAATGTACCTANNGTTTTTAATGGAATACCTGGTAGGCCTCATCATGTTTTTTGCCTATAAAGCAAATCAAATTCAGAAAAAGGGTAGCGGGGTTACCAGGGGGATATAGGGAAAAACTGAAAAAGGATTTGTGGGGAA…
GmaAffx.87179.1.S1_at	BQ612559	At5g53350	1e-87	Protein Destination & Storage			TTTGTTGGGAGGTTTCCTATCCTTGTCAGTTTGTCAGCTTTAACTGAAAATCAACTNATTCAGGTCCTCNCAGAACCAAAGAATGCTCTNGGGAAGCAATACAAGAAGATGTTCCAAATGAATGGGGTAAAGCTACATTTTACAGAAAACGCTNTNNNNNCAATTGCCAGAAAGGCAATATCTAAAAATACTGGTGCTCGGGGATTACGATCAATATTAGAAAATGTGTTGGTAGATGCCATGTATGAGATTCCTGATATTAGAACAGGCGATGATGTTATAGATGCTGTTGTTGTTGATGAAGAGGCTGTTGGAGGTGAGGGGCGTGGGAGAGGGGCTAAAATCCTTTATGGTANGGATGCATTGGATCGATATCTTTCGGAGCAGAAAAATGATTCA…
Gma.16753.1.S1_at	CD394074	At1g11750	6e-97	Protein Destination & Storage			GATTGCATGTCTTGGATAAAGCCCAAGGTTGGTACCGTGNGTTTNGGAGTAGCTGCAAGCCAAGGAGCACTTCTCCTTGCTGGAGGTGAGAAGGGAATGCGCTANGCGATGCCAAATGCTCGCATAATGATACATCAACCACAGAGTGGATGTGGGGGTCATGTTGAGGATGTCAGACGCCAAGTGAATGAAGCTGTTCAATCTCGCCATAAAATTGACAAGATGTATAGTGTTTTTACTGGACAGCCATTAGAGAAGGTGCAACAGTACACAGAGAGGGACCGTTTTCTGTCTGTTTCTGAGGCTTTGGAGTTTGGTCTTATTGATGGTGTCCTGGAAACNGAGTATTGAATACANTTTATTTGCAGGATATATCTTAGAGGTTGAAAATGNTAATTN…
GmaAffx.90162.1.S1_s_at	CF805887	At2g28840	2e-64	Protein Destination & Storage			CTGCTGCCAATGGTCGGATCGAGGTTCTTTCCATGTTGTTGGATAGGTCTTTCAATGTTGACGTATTGAATCGACATAAACAGACCCCGTTGATGTTGGCTGTGATGCATGGAAAGACTGGTTGTGTTGAGAAGCTTATTCATGCCGGAGCGAATATATTGATGTTTGATTCTATACGTCGAAGAACTTGCTTGCACTACGCTGCTTATTATGGGCATATAGACTGCCTTAAGGCCATTCTTTCTGCTGCTCATTCCACACCTGTTGCTGATTCTTGGGGATTTGCAAGATTTGTCAACATAAGAGATGGAAACGGTGCCACCCCTCTGCATCTTGCAGCTCGCCATAGA
Gma.17539.2.S1_s_at	BM886770	At5g35590	1e-57	Protein Destination & Storage			GGTGGATACGATCGTCACATCACTATTTTCTCCCCTGAAGGACGTCTCTTCCAAGTCGAGTATGCTTTCAAGGCTGTTAAGGCCGCAGGAATCACCTCAATTGGTGTCCGAGGAAAGGATTCGATTTGTGTTGTTACTCAGAAGAAGGTTCCGGATAAGCTTTTGGACAACACAAGTGTTACACACCTCTTTCCCATCACCAAGTACCTTGGTTTATTGGCTACTGGCATGACAGCTGATGCTAGGACACTGGTCCAACAAGCAAGAAATGAAGCAGCTGAGTTTCGCTTTACATATGGAT
GmaAffx.91235.1.S1_s_at	CF806960	At4g31300	1e-88	Protein Destination & Storage			TGGGAACCACTATCATCGGCGTTACTTACAACGGCGGTGTCGTTCTCGGAGCCGACTCTCGAACCAGCACTGGAGTGTATGTTGCCAACCGAGCATCGGACAAAATCACACAGCTCACTGATAATGTTTACGTGTGTCGCTCTGGATCGGCTGCTGATTCTCAGATTGTCTCTGACTATGTGCGCTACTTCCTTCACCAACACACGATACAACTTGGACAACCTGCGACAGTTAAAGTTGCTGCAAACCTTGTCCGGCTTCTCGCATATAACAATAAGAATTTCTTACAGACCGGGTTAATTGTTGGTGGTTGGGATAAATATGAAGGTGGACAAATTTATGGAGTTCCTCTGGGTGGAACAATAGTACAGCAACCTTTTGCTATCGGAGGATCTGG
Gma.323.1.S1_at	BI945707	At1g21720	1e-109	Protein Destination & Storage			TTTGTAGTGGCTGGCACTGCATCCGAGTCTCTTTATGGTGCTTGTGAGTCAATGTTTAAGCCTGACATGGAACCAGAAGAATTGTTCGAGACAATCTCCCAAGCACTGCTATCATCTGTAGATCGTGATTGTTTAAGTGGCTGGGGTGGACATGTTTATGTTGTCACCCCAACCGAAGTAAAGGAAAGGATACTGAAAGGAAGAATGGACTAACTTTTAAGCGTGTTTGTTTTGACGTACTCCTACTTTCCGAGGAGCCTGAACGTGAAAGGGGAAATTTGTTGGATTGACGTTCATCACCATTTCAAATGGAAAAACAAATATGCTATGATCCAACCAAATCACTCTTTTCTTGTCATTTTGTTATCCTAGTTTGGATTTAATTGAAAATCATTTACC…
GmaAffx.91569.1.S1_s_at	CF807294	At1g21720	1e-109	Protein Destination & Storage			CAACGCATTTCCAAGATTCACGACAAGCTCTTCATCGCTCTCTCTGGCCTCGCCACCGATGCTCAAACATTGTATCAGCGTCTTGTTTTCCGGCACAAACTGTACCAGCTGCGTGAAGAGAGGGATATGAAACCAGAGACCTTTGCCAGTTTAGTCTCTGCTCTGCTCTATGAGAAAAGGTTTGGTCCATATTTTTGCCAGCCTGTAATTGCTGGATTAGGGGATGAAGACAAACCATTCATTTGCACAATGGATTGTATTGGCGCAAAGGAGCTTGCAAAAGATTTTGTTGTTTCTGGCACTGCATCTGAGTCTCTGTATGGTGCTTGTGAGGCAATGTTTAAGCCTGACATGGAACCAGAGGAATTGTTTGAGACCATCTCCCAAGCACTGCTATCA…
Gma.5808.1.S1_at	AW350083	At1g53750	0	Protein Destination & Storage			GCCCAAATTCCACTGGAGCTGATATAAGGAGTGTATGCACAGAAGCCGGTATGTATGCTATCCGTGCCCGGAGGAAGACTGTAACAGAGA
Gma.1753.1.S1_a_at	CD405404	At2g32730	1e-118	Protein Destination & Storage			TGGGTCAGCAACAGGATTGCAGAGTTCTTCATCAGCCATGGCTGTGGATGAGGAACCTCAGCCTCCTCAACCATTTGAATACACCTCATGAGTTTGGTCCTGATTCATTAAGTTCAAATATTCATCATGGTGCTTATGAAAATTGGTTCTTCTGAGGAGAGTAGCTACC
Gma.2892.2.S1_a_at	BI424590	At1g29150	2e-77	Protein Destination & Storage			CAACAAGGTGCCATAGATCTGCAGAGTGGAATACTTCATGCTGAAGAAAAGGATTATAAAACTGCTTATAGTTAT
Gma.4344.1.S1_s_at	BM524971	At4g24820	6e-33	Protein Destination & Storage			ATTGCAGCAGGGAAGCTTCATTGTAAGATTGATAAAGTTGAAGGTGTTCTTGAAACTAATCGCCCTGATGCTAAGAATGCTCTTTA
Gma.4344.2.S1_at	BI700879	At4g24820	1e-153	Protein Destination & Storage			AATACAAGTCTTTTTTCTCAGCATTTGCTGGCCTGACGGAGCAAATTAAGTTGGACCGCTATCTGCATCCACACTTCCGTTATTACATGAGGGAGGTCAGAACNGTTGTTTATTCCCAATTTTTGGAATCTTACAAGAGTGTGACAATTGAAGCCATGGC
Gma.13177.2.S1_a_at	AW507568	At5g23740	2e-54	Protein Synthesis			GCAAGCTTCGCCGTTTGAAACAGTGCCTCAACCATGGCAGAACAAACAGAGAAGGCTTTTCTGAAGCAACCAAAAGTGTTTCTATGCTCTAAGAAAGGTGGGAAGGGAAAGAGGCCTGGGAAAGGTGGGAATCGCTTTTGGAAGTCAATTGGGCTTGGATTCAAGACTCCCAGAGATGCCATTGAAGGAACNTATATTGACAAGAAGTGCCCCTTCACTGGCAATGTTTCCATTCGGGGTCGTATCCTAGCCGGTACTTGTCACAGTGCTAAG
GmaAffx.92522.1.S1_at	CF808247	At5g23740	1e-73	Protein Synthesis			CTTCTGCAGCTTTCGCCGACAGCTTCATTCACCATGGCTGAGCAAACCGAGAAGGCTTTTTTGAAACAACCAAAAGTGTTTCTCAGCTCGAAGAAAACTGGGAAGGGAAAGAGACCCGGAAAGGGTGGGAACCGCTTTTGGAAATCCATTGGGCTTGGATTTAAGACTCCCAGGGAAGCCATCGAAGGAACCTACATTGACAAGAAGTGCCCCTTCACTGGCAATGTTTCCATCCGTGGCCGTATCTTGGCTGGAACATGTCACAGTGCTAAGATGAACAGGACTATTATTGTTAGGAGGAATTATCTCCATTTTATCAAGAAGTACCAGAGGTACGAGAAAAGGCACTCCAACATTCCTGCTCATATATCACCTGCTTTCCGTGTGAAGGAAGGAGAT…
GmaAffx.91708.1.S1_at	CF807433	At5g09510	7e-72	Protein Synthesis			AAGTTCAGTTTTCGAGGCGTGGATCTCGATGCACTTCTCGACATGTCCACCGATGAACTCGTCAAGATGTTCAGTGCCCGCGCTCGTAGAAGGTTCCAGAGAGGCCTCACCAGAAAGCCCATGGCCTTGATCAAGAAGCTCCGTAAAGCGAAAAGGGAAGCTCCACCAGGTGAGAAGCCAGAACCAGTACGCACCCACCTCCGCAACATGATTATTGTGCCTGAGATGATTGGTAGCATTATTGGAGTGTACAATGGCAAAACCTTTAATCAGGTTGAAATCAAACCTGAGATGATTGGGCATTATCTTGCTGAGTTTTCTATTTCATACAAACCCGTTAAGCACGGGAGACCTGGTATTGGTGCTACTCACTCATCCAGGTTTATTCCTCTTAAGTGA…
Gma.18010.1.S1_a_at	CD398452	At2g09990	2e-70	Protein Synthesis			GAGCAAGTGCAGTGCTTCGGGCGGAAGAAGACGGCGGTGGCAGTGACCTACTGCAAGCGCGGCCGAGGCCTCATTAAGATCAACGGCTGCCCGATCGAGCTGGTGGAGCCGGAGATCCTCCGCTTCAAGGCCTTCGAGCCAATCCTCCTCCTCGGTCGCCACCGCTTCGCCGGCGTGGACATGCGCATCCGCGTGAAGGGCGGCGGTCACACCTCCCAGATATACGCCATCAGGCAGAGCATAGCCAAGGCTCTCGTCGCTTACTACCAGAAGTACGTCGACGAGCAGTCCAAGAAGGAGATCAAGGACATCCTCGTCAGGTACGACCGCACCCTCCTCGTCG
Gma.15766.1.S1_s_at	AW350453	At3g02080	1e-62	Protein Synthesis			TGTTTCGCCTCACGATTTCGTGAAGGCTTANGCNTCCCANCTCAAGCGTTCCGGCAAGATGGAGCTTCCTGAGTGGACNGATATTGTAAAAACAGCAAAATTTAAGGANTTGGCTCCATATGATCCTGACTGGTANTANNTTAGGGCTGCCTCAATGGCAAGAAAGATNTATTTGAGAGGNGGTCTTGGTGTTGGNGCTTTCCAGAGGATCTATGGTGGAAGCAANAGAAATGGAAGCCGTCCCCCACATTTCTGCAAGAGCAGNGGNGCNATTGCNAGACACATTCTGCAACANTTGCAAAACATGAGCATTGTTGAGATTGATACAAAA
Gma.16380.1.S1_at	BQ611280	At3g56340	2e-29	Protein Synthesis			TATGAACAATATACACTTCCAAAACTCTATGTGAAGATGCAGTACTGTGTTTCCTGTGCTATCCACTCTCATGTTGTGAGGGTTCGATCCCGCACCGACAGGNAGGNNNAAGCGNNNNTGNGCNNNNCTCCACAGAGATTCATCAGGCGCAGGGATGATGCACCAAGACCTGGTCAGCCCGGTCAAGGACCTCGTCCTGCTGGCACAGCAGCAGCACCTGTCCGAACCTAAAAGCAAGTCCTAAGGAATAAGCCTTGATTTTATGCTGGACCAAATTTATAATATA
GmaAffx.89925.1.S1_x_at	CF805650	At2g17360	8e-36	Protein Synthesis			AGCATAAGGGTAGCTTCGAGACAATTCACGTGCAGGATGCCACTGGGCATGAATTTGCTACTCGTATGGGCAATGTGTTCACTATTGGCAAGGGGACAAAGCCATGGATATCCCTGCCCAAGGGTAAGGGTATTAAGCTATCAATCATTGAAGAAGCTAGGAAAAGGATTGCCGCCCAGCAAGCAACTACTGCTTAAAAAACCCCCCTTTTGAATGAATAGACTTGAGTGCTTGGTAGTTTTGTTCAATGTTTTTGTTTTCTAATTTCTTTTGTCTAAGTTTTTAATCGTTGAAT
GmaAffx.91182.1.S1_s_at	CF806907	At5g07090	1e-113	Protein Synthesis			GCGACATGTCCTTGTTGATGGCAAAGTCAGGACAGACAAGACATATCCTGCTGGTTTCATGGATGTTGTATCAATCCCTAAAACAAATGAGAACTTCCGCCTGCTGTATGACACCAAAGGCCGATTCCGTCTTCACTCAGTCAGAGATGACGAGGCTAAGTTCAAGCTTTGCAAAGTTCGCTCAGTGCAGTTTGGGCAAAAAGGTATCCCATACTTGAACACCTACGATGGTCGCACTATCCGCTACCCAGACCCTCTCATCAGAGCTAATGACACCATTAAGTTGGATTTGGAGGAGAACAAGATTGTCGATTTCATCAAGTTTGATGTTGGGAATGTAGTCATGGTGACAGGTGGAAGGAATAGGGGTCGTGTTGGAGTGATCAAGAACAGAGAGAA…
GmaAffx.89937.1.S1_s_at	CF805652	At5g58420	1e-88	Protein Synthesis			GTCACGAGGAGCACTAGCTAGTTTCACAATTTCCAAATGGCTAGGGGATTGAAGAAGCATCTCAAGAGGCTCAATGCTCCTAAGCATTGGATGCTTGACAAACTGGGTGGTGCATTTGCGCCCAAACCCTCATCTGGACCACACAAATCTAGGGAGTGCCTTCCCCTCATACTCATCCTACGAAACCGGCTAAAGTATGCTCTGACTTACCGTGAAGTCATCGCTATTCTGATGCAGAGACATGTT
GmaAffx.89146.1.S1_s_at	CK605578	At4g31700	3e-77	Protein Synthesis			CAAGAGGATCTCACAAGAGGTTGTTGGTGATGCTCTGGGTGAGGAATTCAAAGGTTATGTCTTCAAAATTACTGGAGGTTGCGACAAGCAAGGATTTCCAATGAAGCAAGGAGTGTTGACCCCTGGTCGTGTTCGCCTCTTGCTGCATAGAGGAACTCCTTGTTTCCGTGGTTACGGAAGGCGCAATGGAGAGCGTAGGAGGAAGTCTGTTCGTGGGTGCATTGTCAGCCCTGACCTCTCTGTTCTCAACTTGGTAATTGTGAAGAAGGGTGAAAATGATTTGCCTGGCCTGACAGATGTTGAAAAGCCAAG
Gma.1556.1.S1_x_at	AW350048	At5g10360	2e-91	Protein Synthesis			TATGTCAACACCTACCGTCGTACATTTACGACAAAAGCTGGGAAAAAGGTGAGCAAAGCTCCTAAGATACAAAGACTGGTCACCCCTCTTACGCTCCAACGAAAGCGGGCAAGAATTGCTGATAAAAAGAAGAGAATTGCCAAGGCNAAATCGGAGGCAGCAGAGTACCAGAAACTCCTTGCCTCCAGGTTGAAGGAGCAGAGAGACCGCCGCAGTGAGAGTTTGGCTAAGAGGAGATCCAAGCTTTCCAGTGCTGCCAAGGCAGCNNNTGTNTAAGCTGCTTTCAGATATAAAGAGATATGGTGAAGTTTTAATCATCATATTTAGTTTTTGTTTGTTATTTTATAACCGGCTGTTGT
Gma.3328.1.S1_at	AF020553.1	At3g04770	1e-107	Protein Synthesis			TACGTGGACATTGGAATTCCTGCCAACAACAAGGGCAAACACAGCATTGGTTGTCTCTTCTGGCTCCTTGCAAGGATGGTGTTGCAGATGAGGGGTACCATTCGCCCTGGCCTCAAATGGGATGTCATGGTTGATCTGTTCTTCTATAGAGAACCAGAGGAGGCTAAACAACAAGAGGAGGAGGAAGCTCCGGCGGTTGATTATGCCATCACGGATTTCAATGCAGGTGCTATTGCTGNTGATGGCCAGTGGCCTGGTACAATTGATCAATCATGGAGTGATGCAGTTCCTCAACCTATTCCAGCAGTACCTGGTGTCAACTGGGGGGCACCTGCAGAAGCACCTGCTGCTGCAGGAGGAGATTGGGGGGAAGCTGTTCCACCACCACAACAAATCCCT…
Gma.9829.1.S1_at	L46848.1	At2g40010	1e-126	Protein Synthesis			GACCCAAGTAAATTTGCCGTTGCCGCCGTTGCTGCTCCTGCTGCTGCATCTGGTGCTCCAGCGGCTGCAGCCAAGGAGGAGGAAAAGAAGGAAGAACCAGCTGAAGAGTCTGACGATGACATGGGTTTCAGTCTGTTTGACTAAATTAAGTAATACTTTTGTTGAGTTTGCTTTGTTAGAATTAATGAAGTTGTTTGTCTTTCATTTTAGGTGCTATTTTAGTTTGCTGTCTTTTCAATTCATGTTACATTGCAACTAGTTTTTAAATCCCATA
Gma.17644.1.S1_at	BU090070	At3g44590	3e-14	Protein Synthesis			AAAGCCAGAAGAAGCGAAATCGTAATCGCAATCTAGCGGATATGAAGGTCGTCGCTGCATACTTGCTCGCAGTGTTGGGAGGGAATCCATCTCCTTCTGCCGATGATATCAAAAACATCCTCGGCGCAGTTGGAGCTGAGGCTGAGCATGAGTTGATTGAGTTGCTCTTGACCGAAGTCAAGGGCAAAGACTTCAATGAGCTACTTGCTAGTGGAAGTGAAAAGATTTCTGCAGTGGCTGGTGGT
Gma.16348.2.A1_at	AW704088	At1g26910	4e-16	Protein Synthesis			GCTTAGATATGGCTTGTTACTTGGAAATAGTGGGCTTTGACCACAATAGTTGTGTTCAACTAAATTCGAGTTTCTTATTTGCTCTACTGGTAGTATTAAACTATGTTGAGTTTATCTCATCTTTTGTGAGCCATCTTGAATGGAATTACTGTCATATTTGGTTTGTATTTCCTTGTTGTTGATGGTTTTGTTTGGCATTTGATAATTGCTTGATGAGA
Gma.6491.1.S1_at	CD395105	At1g08360	1e-94	Protein Synthesis			AATATCATGCCTTTTTGGCCTCTGAAGCAGTCATCAAGCAGATTCCTCGTCTCTTGGGACCTGGTCTCAACAAGGCAGGGAAGTTCCCTACGCTTGTGACTCACCAAGAATCTCTCGAGTCAAAGGTTAATGAGACCAAGGCCATGGTGAAGTTCCAGCTTAAGAAGGTGCTTTGCATGGGAGTAGCCGTGGGGAATGTTAGCATGGAGGAAAAGCAAATCTTCCAAAATGTACAACTGAGTGTTAACTTCCTTGTCTCTTTGTTGAAAAAGAATTGGCAGAACGTTCGCTGCCTGTATCTGAAGAGTA
GmaAffx.90838.1.S1_at	CF806563	At1g08360	6e-94	Protein Synthesis			CTGGATGGATGTGGAAGCCCTGAAGAAGCTAAACAAAAATAAGAAGTTGGTGAAGAAACTAGCTAAAAAGTACCATGCCTTT
GmaAffx.91512.1.S1_s_at	CF807237	At3g05590	4e-62	Protein Synthesis			CGATTTGAAGGCAGGAGGTAAGTCCAAGAAGACCAANCGNACNGCCCCCAAATCCNATGATATNTACCTCAAGCTNCTCGTCAAGCTGTACCGTTTTCTTGTTCGGAGGACTGGNAGTAACTTCAATGCNGTNNTCCTCAANCGCCTTTTCATGAGCAAGGTCAACAAGCCCCCGCTATCCCTCTCTAGATTGATNCGTTACACNAAGGGAAAGGAGGATAAGATAGCTGTGGTNGTNGGNGCCGTGACCGATGACATTAGGGTNTATGAAGTCCCTGCTCTGAAGGTAACTGCCNTGAGGTTCACTGAAACTGCCAGAGCTAGAATTGAGAAGGCTGGTGGNGANTGCCTCACCTTTGATCAACTGGCTCTTAGAGCTCCACT
GmaAffx.89631.1.A1_s_at	CK606099	At3g14600	3e-80	Protein Synthesis			CAACCAAGATTAAGAACTACGGGATATGGTTGCGGTATCAGAGTAGGACTGGTTACCACAACATGTACAAGGAGTACCGCGATACCACTCTAAACGGTTCAGTT
GmaAffx.91192.1.S1_s_at	CF806917	At1g02780	6e-65	Protein Synthesis			AAGAAATCGAAGAAGTGAGCAGCATATCCTGGAATTCAAAGGACCTTGAATCTTTAATAGC
Gma.10584.1.S1_at	CD402134	At1g23290	3e-57	Protein Synthesis			GATGAGGTACTTTCATAAGCTCCGCAACAAATTCTACTCCCCCATCGTCAACATCGACAAGCTATGGTCTCTGATACCCCAAGACGCGAAGGACAAAGCCCTAAAATCGAAGGACACTGCCCCTCTAATCGACGTCACTCAGCACGGGTACTTCAAGGTTCTCGGAAAAGGTGTGCTGCCCCAAAACCAGCCCATTGTTGTGAAGGCCAAGCTTATTTCGAAGATCGCGGAGAAGAAGATCAAGGAAGCCGGTGGTGCTGTTCTTCTTACGGCTTAGGTTAATTTTTTTTTCCCATACATTCGAGGTTGTTGTTTTTGTTTTGTGTGTTTTGTTTCGGATGACTTTTTTATATTACA
Gma.5841.2.S1_s_at	CD403513	At1g70600	8e-63	Protein Synthesis			AGAGGCCACGTGAGTGCCGGCCATGGCCGCATCGGGAAGCACCGGAAGCACCCTGGAGGACGCGGTAATGCCGGAGGCATGCACCACCACCGGATCCTCTTTGACAAGTACCACCCTGGGTTCTTCGGCAAGGTCGGAATGCGCTATTTTCACAAGCTCCGCAACAAATTCTACTCTCCGATCCTCAACATCGACAAGCTCTGGTCCCTGGTTCCGCAAGAAGTGAAGGACAAGGCCTCCAAGGAGAACAAGGCGCCGCTGATCGACGTCACGCAGTTCGGGTACTTTAAGGTTCTCGGAAAGGGTGTTTTGCCGCAGAACCAGCCCGTTGTTGTCAAAGCTAAGCTTATTTNCNAAGATCGCTGAGAAGAAGATCAAGGAGGCTGGCGGTGCTGTTGT…
GmaAffx.89930.1.S1_s_at	CF805655	At3g59540	2e-32	Protein Synthesis			GGAATCGCAGCGAAGTCCACTATGCCGAAGCAAATTCATGAGATTAAAGACTTCCTCCTCACTGCAAGGAGGAAGGATGCACGCTCTGTGAAAATCAAGCGGAGCAAGGATGTAGTGAAGTTCAAGGTCCGTTGCTCCAAGTACCTGTACACTCTGTGTGTGTTTGATTCTGAGAAGGCTGATAAGTTGAAGCAATCACTTCCTCCAGGTTTAAGCGTGCAGGATGTGTGATTCTTACTGCTGT
Gma.10688.1.S1_a_at	CD405473	At3g09630	0	Protein Synthesis			TTTTGATAAGCCCTCTGAGAAGAAGAAGGGGTACTTGCTTCCCAGGCCCAAGATGGTTAACTCTGATCTTGCCAGGATTATTAATTCTGACGAGGTTCAGTCTGTTGTGAGGCCCATTAAGAAGGATGTGAAGA
Gma.10688.3.S1_at	CA935467	At3g09630	0	Protein Synthesis			ATGGTGAATTCGGACCTCTCCAGGATTATTAATTCTGATGAGGTGCAATCTGTTGTGAGGCCCATTAAGAAGGATGTGAAGAGGGCCACTCTCAAGAAGAACCCTCTTAAGAATCTCAACTCGATGCTGAAGCTGAATCCTTATGCCAAGACTGCTAAGAGGATGGCCCTTCTCGCTGAGGCACAGCGGGTTAAGGTCAAGAA
GmaAffx.89806.1.A1_x_at	CK605695	At1g74060	3e-64	Protein Synthesis			GTCTTTTTGAAGCAGCTTCCTTCTGGNTTGCTTCTTGTNACTGGTCCTTTCAAGNTTAATGGAGTTCCTTTGAGACGTGTNAATCAGNCNTATGTTATTGGCACNTCNACCAAAGNANATNTNTCTGCTGTTAATGTNGNANCAGNTTTGNNGACAAATACTTTNCNAAGGAAGCCCNNNAGAAGAAGAAGAAGGGAGANGGCGANTTCTTTGAGGCAGANAANGAGGAAAAGAGTGTGTTGCCCCAGCAGAAGAAAGATGACCAGAAAACTGT
GmaAffx.91649.1.S1_s_at	CF807374	At4g36130	1e-125	Protein Synthesis			GCTTCCGGAGCCTGGATTTCGGAGAGCGCAACGGCTACCTGAAGGGTGTCGTCACTGACGTCATCCACGATCCTGGCCGTGGCGCGCCTCTCGCTAAGGNCGCCTTCCGCCACCCGTTCCGCTACAAGAAGCNGAACGAGCTCTTCATCGNCGCCGAGGGTCTCTACACCGGCCAGTTCATCTACTGCGGCAAGAAGGCCACCCTCGTTGTCGGCAATGTGTTGCCTCTTCGATCCATTCCTGAAGGAGCTGTCATCTGCAACGTCGAGCACCATGTCGGCGACCGCGGCGTCTTCGCTAGGGCGTCTGGAGACTACGCCATTGTTATCAGTCACAACCCTGATAATGACACCTCTAGGATTAAGCTCCCATCTGGTTCAAAGAAGATTGTTCCAAGTG…
GmaAffx.48770.1.S1_at	BG046039	At1g18070	1e-148	Protein Synthesis			CAAACTCGTGAACATGTCCAGCTTGCAAAAACGCTGGGTGTGTCTAAGCTTCTTGTTGTCGTCAATAAAATGGATGAGCCTACAGTGCAATGGTCGAAAGAAAGGTATGATGAAATTGAGTCGAAGATGGTTCCATTTTTAAAGCAATCTGGATACAACGTAAAAAAAGATGTCTTGTTTTTACCAATNTCTGGTCTAATGGGTGCAAACATGAAAACAAGAGTGGATAAAAGNGTTTGTCCATGGTGGAANGGNCCTTGCTTATTTGAGGCACTTGACGCTATTGAAGTTCCACTGCGAGATCCCAANGGTCCTTTCAGGATGCCTATTATTGACAAATTCAAAGACATGGGAACTGTTGTTATGGGCAAAGTTGAATCTGGCAGTGTTCGTGAGGGA…
GmaAffx.91136.1.S1_s_at	CF806861	At5g12110	8e-57	Protein Synthesis			GTAAGATTCAGTGGCGCTGCTGCTCCAGCTGAAGCTGCACCTGCCAAAGCGGCTGCCACTGCTGAAGAAGATGATGATGATCTTGATCTCTTTGGTGATGAGACAGAGGAGGATAAGAAGGCAGCAGAGGAAAGGGAGGCTGCTAAAAAGCCTGCCAAGAAAAAAGAGAGTGGCAAGTCTTCTGTCCTTCTCGATGTTAAGCCTTGGGACGATGAGACCGACATGAAGAAGCTGGAAGAGGCTGTCCGTAGTATTGAGATGCCTGGTTTATTGTGGGGAGCATCCAAACTAGTTCCCGTGGGATATGGTATCAAGAAGTTGCAGATCATGATGACTATTGTTGATGACCTTGTATCAGTGGACACTCTTGTTGAGGAACGCTTGACAGTTGAGCCATGC…
GmaAffx.91918.1.S1_at	CF807643	At1g56070	1e-134	Protein Synthesis			CAAGAAACTGTAGAGGATGTCCCCTGTGGTAATACAGTGGCTATGGTTGGTCTTGACCAGTTCATCACAAAGAATGCAACATTGACAAATGAGAAGGAAGTCGATGCCCACCCTATCCGAGCTATGAAGTTT
GmaAffx.93348.1.S1_s_at	CF809073	At1g56070	6e-81	Protein Synthesis			ATTGATGAAGCGTGTCATGCAAACCTGGCTTCCAGCAAGTAGTGCATTACTGGAAATGATGATATTTCATCTACCCTCTCCATCAACAGCCCAGAAGTATCGTGTGGAGAA
GmaAffx.92104.1.S1_s_at	CF807829	At3g13920	3e-69	Protein Synthesis			GTTGACTGACAAGATGAGAAGCCGTGACCACACAGTCTCAGCAACCCACGGAGACATGGACCAGAATACCAGGGACATTATTATGCGTGAATTCCGTTCTGGGTCTTCCCGTGTCTTGATAACCACTGATCTTTTGGCTCGTGGTATTGATGTGCAACAAGTGTCTCTAGTTATAAACTTTGATCTCCCTACACAGCCTGAGAACTATCTCCACCGTATTGGTCGTAGTGGGAGGTTCGGAAGGAAAGGTGTTGCGATCAATTTTGTCACAAAGGATGACGAGAAAATGCTGTTTGACATCCAGAAGTTTTACAACGTGCAAGTTGAGGAGCTGCCTTCAAATGTTGCTGAGCTCCTTTGATCAGATTTTGTC
Gma.6702.1.S1_at	CD416000	At1g53900	5e-82	Protein Synthesis			AAACTATTTCGGGTCTTCTGCACAGAGGGAAGACCAGACCGAACAGGTTTGCGGTTGTCGAATGAGCTGGCCAAACTTGATGTTTCAGTGAAACTTCTAATAGATTCTGCTGTTGCATATACTATGGATGAGGTGGACATGGTTTTTGTGGGTGCNGATGGAGTTGTCGAAAGTGGGGGCATAATCAACATGATGGGNNCNNATCAAATAGCATTGGTTGCTCACAGTATGAATAAACCAGTTTATGTCGCTGCTGAGAGCTACAAGTTTGCTCGCCTTTACCCTCTTGACCAAAAGGATTTAGCCCCTGCATTACGCCCTATTGATTTTGGCGTACCTATTCCATCGAAGGTTGAGGTTGAAAGGTCCGCGCGGGACTACACCCCTCCTCAATACCTG…
Gma.11316.5.S1_at	AW201374	At3g56150	4e-93	Protein Synthesis			TGGTAGTGGAACAGCCTCGTCAGGTGGTAGATGGCAAGACCTGTCCCTTTCTCAGCCAAGGCAAAGCAGTGGGCGTGCAGGATATGTTGGTGGTGGTGGAAGGCCAATGGCATTAGGCCAAGGGAGTGGCTATTCCAGGGATCGATCGGGACGAGGATCAGGTGCTGGCTATCAGAGTGGACGATATCAGGGGGGTTCAGCATTGAGGGGACCCCATGGCGATGTATCTACACGCATGGTTAGCCTTAAGGGTGTTCGTGCTTAGAGAAGTTCAAAATTATCTTCTGTACGCCAGT
GmaAffx.90238.1.S1_at	CF807586	At5g18110	6e-98	Protein Synthesis			GTGGTGCAGTACTTAGCATTCGATTCAATGAGGATATATTGAGTGTCTGGAATCGCAATGCTTCGGACCATCAGGCTGTNATGGCTCTGNGAGATTCAATCAAACGTCACTTAAAGCTTCCACATAGCTATGTTATGGAGTACAAGCCCCATGATGCCTCTCTGCGAGACAATTCATCTTACAGGAACACTTGGTTGAGAGGCTAGAGATTCAATTGGGTTCTTGCCAAAGTCCCCGCCGTGGAAGCTATATTGCATATTGGTGCAGCTTTCACTCGGCCAGTTAATCATTGGCTTCGGTCTAGTGATAGTGATGGTGCT
GmaAffx.89296.1.S1_s_at	CK606384	At3g12390	9e-56	Protein Synthesis			TCACAGGTGTCAGTCGTGTGACTGTTAAGAAGAGCAAAAATATCCTGTTTGTTATATCAAAACCAGATGTTTTCAAGAGCCCGACTTCTGACACATACATTATATTCGGCGAAGCCAAGATTGAAGACTTGAGCTCACAGCTACAAACTCAGGCAGCAGAGCAATTCAAGGCTCCTAATGTGAGCAATGATGGATCGAAGCCTGAAACCTCTGCTGCTGCTGCTCAAGACGACGAGGATGTCGACGAGACTGGTGTAGATCCCAAGGATATAGAGCTGGTGATGACTCAAGCTGGTGTGTTGAGATCAAGAGCTGTTAAGGCTCTCANAGCTGCCAATGGCGACATTGTTGCTGCCATTATGGAGCTAACTAATTGATGATGGTCAGATTTGGGATAAT…
GmaAffx.75176.1.S1_at	BF070694	At3g49470	8e-17	Protein Synthesis			CCGTCGATGACGCAACCCAGTTGAAGAAATCCCAACCGCAGGAGGATGATGCTCCCGTTGTCGAGGACGTGAGGGATGATGACAAGGACGACGACGATGAGGACGACGACGACGATGATGAAGATGACAAGGAAGACGATGCTCTAGGTGGTGCTGAGGGTTCAAAGCAGAGCAGAAGTGAGAAGAAGAGTCNAAAAGCAATGTTGAAGCTGGGACTAAAACCTGTCACCGGTGTTAGTAG
GmaAffx.91307.1.S1_s_at	CF807032	At3g49470	2e-24	Protein Synthesis			TCGATGACGCCACTCAGAAGAAGATACCCCAACCACAGGAGGACGATGCTCCCCTTGTCGAGGACTTGAAGG
Gma.7504.2.S1_a_at	BF324501	At5g46160	3e-28	Protein Synthesis			TTTGCTTCCAGATGCTCTCGTGTGGGCCGTTCTCTGTTCGGTGGATTAAGCAACAGTTCCCCTGGTTTATTTACCACATTACATGAGATGACATGCAAAAATATGTTTTCTCAGCAACAACGTACCTTCATACAGATGAGGACTGTTCTCAAGGTTGTGGATAACTCGGGGGCTAAAAAGGTGATGTGCATACAGGCATTGAAAGGGAAGAAAGGGGCAAGATTAGGTGACACAATAATAGCATCTGTGAAGGAAGCACATCCTAATGGAAAAGTG
Gma.3060.1.S1_s_at	AW310167	At5g20160	4e-45	Protein Synthesis			GCAGCTCAAAAAAGGTGCTAATGAAGCCACTAAAACCCTGAACAGNGGTATCTCTGAATTTGTTGTNATGGCTGCTGATACTGANCCCCTTGANATTCTTCTNCATCTTCCTCTACTNGCNGAGGATAAGAATGTGCCCTACGTGTTTGTCCCTTCAAAACAAGCACTTGGNCGTGCATGTGGGGTCACCAGGCCAGTGATTGCTTGTTCTGTGACAACTAATGAAGGGAGTCAATTGAAATCTCAAATNCAGCAACTAAAGGATGCTATTGAGAAGCTTTTNATCTGAAAAANNNNNNATCNNNNNNNNAAANNNNNNATCGNTATGATGGGCTTCTTGAGNNGTGNCAATTGCTCCTTCTGAGGCTTTGACTGGACGAGCT
Gma.16568.1.S1_at	AW309845	At2g01720	2e-53	Protein Synthesis	Protein Modification		ATTCATACCTTGATGTTGTCGGCAGAACTGTGGTGGTTCTAGAAAAAAGAAATGCAGTTCCTGAGCATAATACTCCTTTCCAGGTATACTACAGGTTTAACCCCATATTCATGCTTGCTGAGCCATTGATGCTGGTATCTGCATTTTTCTTGTTTTTTGTGGCTTCNGTGGCATATCTTCACATTGATCTTTCCATACGCAAGTGATGAACACCTAGCTAGTTTCTTGAAAGGNNNNNNNNNNNNNNNNNNNNNCAGTGACTGAGCAGATCCAAGGNTTCCTTATTTTNGAAGGTCATATTGCATTNTGGCAATTTTGTNTGGAGTTAAGAGGANTAATTGCAGTTATAGATATACTTGTTTGTACANTTTTTCCCAGGCAATTTGATCTTGTGCCATT…
GmaAffx.82885.1.S1_at	BM731847	At3g62120	1e-112	Protein Synthesis			GATATTTCCGGTTGCTATATTCTGAGGCCTTGGTCAATGGCAATATGGGAGATCATGCAAGAGTTTTTCGATCCAGAAATAAAGAAAATGAAAATCAAGAACTGCTACTTCCCATTGTTTGTNTCTCCTGGAGTTCTGCAAAAGGAGAAGGACCACGTTGAGGGTTTTGCTCCTGAGGTTGCTTGGGTGACAAAGTCTGGGGAATCNGAATTAGAAATTCCTATNGCTATTCGTCCTACTAGTGAAACNGTNATGTATCCCTACTACTCTAAGNTGGATAAGGGGACATCGTGACTTGCCTTTGAAACTTAATCAGTGGTGCAATGTTGTNAGATGGGAGTTCAGCAACCCCACTCCATTCATCAGGAGTCGNGAGTTTCTTTGGCAAGAAGGGCACAC…
GmaAffx.36115.2.S1_at	BI974346	At2g40660	1e-40	Protein Synthesis			GTTTGGCAAAGTACTGCAATCCTGATGAGTTGACGGTGATGTAGTTTCTTAACTGCGTGCAATGGTTGGTTGTATTCATTTTGCATTGTAATTAACTCTTATGTTTCTGCTGTTTGATTTCATTTTGTAGAATCGTCGTGTTGTACTTATAACAAATGTCAAACCTGGAAAACTACGGGATGTGATGTCTCAAGGATTGGTCTTATGTGCTTCGGATGAAGGTCCAACCATTGTGGAGCCCTTGCTCCCTCCAGAAGGATCACAGAT
GmaAffx.84756.1.A1_at	AW350431	At5g42830	6e-13	Secondary Metabolism			TAATGAGCGCTCTTGAATCAGACAGGGAGTTTATGAATGCTGTTTCGGTTTCCAATCTCTGATGCTCGTTTGCTAAAATGTTCGCAGTATTTGGCAGTTCAACAGCTCAAATATGATTATTTCTGTCATTTTAAACGCTGTTAAATCTTTATTAGTGAAGTGATGCATTTATCTTCTAAGCAATAGATTTTTCGCTCCTCCCACGGAGAAATATCTAGGCTCCCTTGCGCAATGAT
GmaAffx.2487.1.A1_at	BI969955	At5g65550	0.0003	Secondary Metabolism			GAAAATGGCTCAAGATGGATCATTCNCTAGAAACGAAATTGCCAAATCTCTTANACAAGCTATGGTTTTGGAGGAAGGTAANAAGCTCANAATTAATACAGGAGAAGCTGCTGCAATTGTGGGAAACTTGAAGCTGCNCCAGGATCATTACATANCTGCGTTTGTTCAGTTTCTTAAGAATGGAAGCTAGAAAGTGGAAATAGATGTGAAGTTGATGATTGTCACTTGGTTTTATGTACTGTTTCTTGTGTTTTTGGGTTTAAATAAAGTCCTATTATTTAGGGACGTGCAGACAGTGTTTAGGGTTTTTCTAATCAATAAGCCATCACCACGTTGTAGGCTA
Gma.11260.2.S1_at	BI498864	At3g12290	7e-40	Secondary Metabolism			GGATTTAGACCATAGGTAGTCCTTGGAGATAAGANACGCATGTTTTTTGGGAGTACTTTTGGAGTGGACTGATCTGTAGCCACAGTGTAAGTTCTGTTCTTATGTAAGA
Gma.6643.2.S1_at	BE023121	At5g07010	2e-87	Secondary Metabolism			GGTACCACTTGGCTGAAAGCTCTCACCTTTGCCATTGTCAATCGCCATACTCATAGTATCACTACATCAATGTCATCACATCCTTTGCTTACTTCTAATCCTCATGAACTTGTGCCTTTCATAGAATACACCGTTTATGGTAATGCCCCTAGCCATGTTCCAAACCTATCCAACATGACTGAGCCAAGACTTTTTGGTACACATATTCCATTCCATGCATTGGCCAAGTCCATCAAGGAGTCCAATAGTAGAATAATTTATATATGTAGGAACCCACTTGACACTTTTGTGTCTACTTGGATTTTCCTCAACA
GmaAffx.86773.1.S1_s_at	BQ576578	At2g37040	1e-114	Secondary Metabolism			CTTGCAGAAGGAGCTAATTAGGTTTTTGAATGCTGGAATATTTGGCAATGGTACAGAGTCCAATTGCACCCTACCCCACACAGCAACCAGAGCAGCTATGCTAGTGAGAATCAACACACTCCTCCAAGGCTACTCAGGAATCAGGTTTGAAATTTTGGAGGCAATCANAAAGNNNCTGAACAACAACATTACCCCNTGTTTGCCACTTANGGGAACAATCACAGCATCTGGTGATCTTGTTCCTTTGTCGTACATTGCTGGTTTGCTAACTGGT
Gma.4340.2.S1_a_at	BE611760	At4g35160	5e-33	Secondary Metabolism			AGGGACCATGGCAAAAGCCATTGCTNAATCATTCCCTCGGGTGGAATGCATTGTGTTTGATCTACCACATGTTGTTTCTGGCTTGAAAGGAAGTGAGAACCTTAAATATGTTNCAGGGGACATGTTTGANGCAATTCCTCCAGCTGATGCCATTCTGTTA
Gma.6636.1.S1_at	BM523459	At4g35160	4e-18	Secondary Metabolism			AGATTTTTCAAGGTCAAGCTCTCTTGTACAAACATTTGCTTGGCTTCATAGATTCTAAGTGTCTAAAATGGATGGTTGAGCTTGACATACCCGACATAATCCACAGCCATAGCCATGGCCAACCCATTACTTTTTCAGAGTTGGTGTCAATTCTACAAGTCCCACCAACTAAAACTCGTCAGGTGCAGAGCCTCATGCGTTATCTAGCACACAATGGATTCTTTGAGATAGTAAGAATCCATGACAACATAGAAGCATATGCTCTCACTGCTGCTTCAGAGTTACTTGTCAAAAGCAGTGAGCTTAGTTTAGCTCCAATGGTTGAGTATTTTCTTGAACCAAATTGTCAAGGTGCATGGAACCAGTTGAAGAGGTGGGTTCATGAGGAAGATCTCACAG…
GmaAffx.92998.1.S1_s_at	CF808723	At4g35160	1e-23	Secondary Metabolism			AATACAGAACCATGCCAAACCCATTNCTCTTTCTGACTTGGTCTCNACTCTTCANATTCCACCAGCTAANGCTGNTTTTGTGCANCGGTTCATGCGCTTCTTGGCACACAATGGNATNTTTGAGATCCATGAGAGCCAAGAAGANCATGAANTAACATATGCTCTAACCCCTGCATCAAAGCTTCTTGTCAATAGTAGTGATCATTGTNTATCTCCAATGGTTCTAGCNTTTACCGATCCACTTCGGAACGTTAAATANCATCACTTGGGGGAATGGATTCGTGGGGAGGACCCCTCAGTATTTGAGACAGCCCACGGAACAAGNGCTTGGGGNCTTCTTGAGAAAAANCCTGAATATTTTNGTCTCTTCAATGAGGCTATGGCAAGTGATTCCCGAAT…
GmaAffx.77765.1.S1_at	BI945137	At3g27400	2e-54	Secondary Metabolism			GTGTAGACACGGGTATTTCCATGTGGTGAACAACGACTACACCCACTGGGAAATGTNNGCNATTGGTGGGAGTGCAAANCCTACCATCAACAGCCAAGGGAACAGGTTCCTTGCCCCAAANATCAGGTTCAGCAANGAGGTAACCAAGCATGAGGATGCTCCACAGAGTGAGTGGATGGGNTGGAATTGGAGGTCAGAGGGTGACATGTTCTTGAATGGAGCATACTTCAGGCAATCTGGTGCTGGTGCCTCTTCCAGCTATGCTAGGGCTTCAAGTCTCAGTGCAAGACCTTCTTCTCTTGTTGGCTCCATGACCACCACTGCTGGTGCACTNACCTGTAGAAAGGGCAACCGTTGCTGATGATTGATGAATTAATGATGATCACTTTAATTATTATT…
Gma.3589.1.S1_at	AW101438	At4g16770	2e-81	Secondary Metabolism	GA Biosynthesis		AGATCTGCAAGGATAAAGTCAACCAACCTCAAGTCTGGGAGGATGTGCCTCATGTAGAAGGGGCCTTAATAGTGAACATTGGAGACATGATGGAGAGGTGGACAAATTGTTTATACAGGTCAACACTTCACAGGGTTATGCCAACAGGAAAAGAACGTTATTCCGTGGCATTCTTCTTTGACCCGGCCTCAGACTGTGTGGTGGAGTGCTTTGAAAGTTGCTGCAGTGAATCATCTCCTC
Gma.5091.1.S1_at	AW707266	At3g09220	3e-53	Secondary Metabolism			AACTCAAGTTCAATTCCACCGTGGAGGTTGTGTTTCAAAATACCCAAATTATGAACGCGCAAAGCCACCCCATGCACCTTCATGGTTTTAGTTTCCATGTTTTGGCTCAAGATTTTGGGAATTTCGATTACACCAAAGATAAACACAAGTTTAATTTGGTGAACCCAATATTTCGCAACACGATTGCTGTGCCAGCGGGAGGATGGGCTGTTATCAGATTCCAAGCNAACAATCCAGGGNATGTGGTTTGTGCATTGCCATGTGGATGATCATCAG
Gma.8028.1.S1_at	AB007503.1	At4g34640	0	Secondary Metabolism			GGTCTTCAGAGGTGTAGTTAAAATGAGGCGAGGTTTAACTGCCAAAGTGATTGACCGAACNANGACTATGGCTGATGTCTANGGTGCTTTNTTTGATTTTGCTTCTATGTTGGAGNCCAAGGTTGACAAAAANGATCCCAATGCAACNAAANCATTGAGCAGGCTGGAAGCTATACAGAAAACTTGCAGAGAATCTGGTCTCTTNAGTAAAAGGAAATCTTACATTGTGAANGATGAAAGTGGATATGGCTCAACCATGATTNTCNTANTGGTCATCATGGTTTCCATCATTTTTNCTTATCTGTCTGCTANCCACCAAAATAACTAGTNNNCTAGNNNTGCNNNNTTGNNNNNNNNAACANTGATANCANGCCTCGTTCATGGAATGCNAATTTGCAT…
Gma.9531.2.S1_at	BG316396	At1g48420	2e-55	Secondary Metabolism	Ethylene Biosynthesis		GACCCAGATTACTTCCACAACTTTGCTCAAGGCTTGCTTGATGGACTCAAGGCTGGCGTTAGCTCAAGAGATATTGTCCACATTCAAAACGCCAAGGGTCTTGGNNATNCNNNNNNNNNATCGGAGGAGCTTAATTTTGTAAAAGAAGTTGCTGCCACTACTGGTGTTGTTCTTGACCCAGTATACAGTGGTAAGGCTGCTTATGCAATGCTGAAAGATATGTCTGAAAATCCAAAGAAGTGGGNAAAGGAGAAAGATCCTCTTCATACATACGGGTGGCCTCCTAGGATTGTATGACAAGGTCGATCAGTTGGCTTCTTTTGTTGGGAATTGGCAACGAATGGATGTCAATGAATCTGTTCCTAGGCAGGATGGTATTGGAAAGATGTTCTAGAGAAG…
GmaAffx.66161.1.S1_at	BE821647	At5g10870	8e-84	Secondary Metabolism			AAGAGTTACTTCCATTGCTTGCTACTTCGGGTGATGATGGNAACTATGCNCAAACTGCAGCTAATGANCTTTCATTATTGCAGNCCATCTCTAGAAGGATTCACTATGGAAAGTTTGTAGCTGAGGTGAAATTCAGGGATGCTCCTCAAGACTACGAGCCTTTAATTCGAGCTAAGGATAAAGAAGGATTGATGAAATTGTTGACATTTACAAGCGTTGAAGAGACGGTGAGGAAGAGAGTTGAAAAGAAGGCTGTGGTGTTTGGGCAGGAAGTGAATCTTAACAGTGATGACAATGACAATGAAAACCGTAAATTTGATCCATCAGTGGCTTCTAGCTTGTACAAAAATTGGGTGATACCNNTNACCAAGGAGGTTCAGGTTGAGTACCTCTTGCGCC…
Gma.3668.3.S1_at	AW704362	At1g77330	3e-62	Secondary Metabolism	Ethylene Biosynthesis		ATTCTCACTTGTACTCATCTCTTTTTCACAACTTTTTTTGTACCTTCTGATCTAATGGCAGTTCCAGTGATTGATTTTTCAAAGCTGAATGGTGAAGAAAGAACCAAAACTATGGCACAGATTGCTAATGGGTGTGAAGAGTGGGGATTTTTTCAGTTGATCAACCATGGTATTCCAGAGGAACTCCTTGAGAGGGTGAAGAAGGTTGCCTCTGAGTTCTATAAGCTGGAAAGAGAGGAGAATTTCAAGAACTCCACATCAGTGAAGCTACTAAGCGATTCAGTCGAAAAGAAGAGCAGCGAAANNNTGGAGCATGTGGATTGGGAGGATGTTATCACTCTCCTTGATGATAATGAATGGCCAGAAAAAACACCAGGATTCAGGGAAACCAT
Gma.12166.1.S1_at	CD409881	At3g25770	2e-61	Secondary Metabolism			AGCAATCTTCAGCTTCTACTTTGGAGACTATGGTCACATAGCAGTGCAGGGACCTTACCTGACCTATGAGGACNCATATTTGGCTGTGACTGGTGGGTCTGGCATATTTGAGGGTGTTAAAGGTCAAGTGAAGCTGCNTCAGATTGTGTATCCTTTNAAGATTTTGTACACATTTTATCTAAAGGGNATCAAGGATTTGCCTCAGGAGCTTCTTGTCAAGACTGTTGAGCCAATTCCATCTGTTGAACCTTCCCCTGCTGCTAAGGCCCTTGAGCCCAATGCTACCATTGCTGGCTTCACCGACTAATTCATCAACTT
GmaAffx.7191.1.S1_at	BE658752	At2g33630	2e-26	Secondary Metabolism			AGATTGGCTATGCTCCCATGGTGACCTCTCGAGAGGGGATGGCTTTGACCATATCTTACTGGCANAGAGAGGAAANCGGACNAACTCTGGATGGANCCGACAATCTATGCGTGGTTGTTTTGTGTCATTGGAATGATCTCACTGTTTTGTGGTGCTTTCTTACCTGATATAGGGATCATGTCCCTTCTCAGAACTACATGTCTATTTGTCTTTCGGTCAATGTGGGTTACAAGGCTGGTGTTTCTTCTGGCTACAGCTGCACATATTGCTGAGGCCATTTATGCTTGGTACCTGGCTAAAAGGGTGGATCCTGCCAATGCAAGAGGATGGTTTTGGCAAACTTTTGCTCTTGGGTTCTTTTCGTTGCGTTTACTANNNNNNNGNNCNAGGAAATNGGTA…
Gma.4962.1.A1_at	BI970069	At3g55360	7e-92	Secondary Metabolism			GGGCTTTCTCTTCAATATTGTTACCTGTGCAAATTATACAACTGAGATCTATCAGTGGNTGGGATTCAACATTGCAACACAAACTGTTGCAGGCTANATTTTCCTTGTGGTTGCTACTTTTATCATGACCAATTGGGCTTTAGCCAAGCACAGGCGTTTAAAGAAGTTATTTGATGGAAAGGAAGGGAGACCTAGGTATCCTCGTCGATGGGTAACATTGCCCCCATTCCTGTAGAAGCCAAAGCAACTGATGAAGTCACCACTCTGCTCACAGGATTCTGAGATTTAAATTGTAGCATAATGGAATTTTCGTGATCTCTTTTTATAAGATATGGATTTGTCTTGCAATGCTTTTGACTATGAAGTTGATTGCTAAATCATTGAATCAGTGTTTTGCAG…
GmaAffx.93183.1.S1_s_at	CF808908	At3g02470	8e-43	Secondary Metabolism			TCTGTTGCTTTGCACATTGACATGCATGGTGAGAAACTTAATAAATTTCCCTTAGACATCAAAGGATACTACTGTGGTGAGAGGAGCACTGAAGAGCTTGGAGTAGGTGGTGCAGTTGTGTACCAAACATTTGTTCAAGGCTGCGATGGNAGTNCATCTCCNAGGTCTATTCTGAAATGCTGCTGGAGTGAGGANGAGAACGAAGATGAAGTGAGGGAGATATAAGTACTTCTGGTTTTTATGTTCTGTTNNNATTTATCTTTACTGTNGAGTGTGTTATTACCTAANTAAATAAATNNTGGGGGTTATGATGTGAGNGNNNNGCTTTGAACTTATTGTGTAGCTTCACTTAATTTGTGTGATTATGCAGATGTTTTTTTCGTTTCTACTGCCAACTCA…
GmaAffx.92905.1.S1_s_at	CF808630	At5g63400	4e-47	Signal Transduction	Unclassified		GATGTTCCCTCTCTGGATCTCATGACTGAGCTCCTTCGTCGTCTCAAGTGCTCTTCCAAACCTGACAAGCGTCTTATTCTCATTGGCCCACCTGGATCTGGAAAAGGCACCCAGTCACCAATCATAAAAGATGAGTACTGCTTATGCCACTTAGCTACTGGTGATATGTTAAGAGCAGCTGTAGCAGCTAAGACCCCTCTTGGTGTCAAGGCTAAAGAAGCTATGGATAAGGGAGAACTTGTTTCTGATGACTTGGTTGTT
GmaAffx.59022.1.S1_at	BG239253	At3g58760	2e-58	Signal Transduction	MAPKKK	Raf	GAACTTTCAGGATTGCATTATGGCGTGGAATTCAGGTTGCTGTCAAGACACTTGGGGAGGAATTGTTCACTGATGATGACAAAGTAAAGGCATTTCATTATGAGCTTACATTACTTGAGAAAATAAGGCATCCAAATGTAGTCCAGTTTTTGGGTGCTGTAACACAAAGCACACCAATGATGATTGTCACAGAATATCTACCCCAGGGGGATCTCGGTGCCTACTTGAAGCGGAAAGGTGCATTAAAACCAGTAACCGCCGTAAAGTTTGCACTTGATATTGCTAGGGGTATGAACTATNTGCATGAACATAAACCAGAAGCCATTATACACAGAGA
Gma.3754.2.S1_at	AW156404	At3g18430	9e-68	Signal Transduction	Protein Phosphatase		TGTATATATTCGCAGGTGGTCTTCTGATTACTGATTCTGGTTTGAAGCCCAAAATTAGTTTAGTGGATATGGGGACTGCATCATCTATTCTAANTCAATACGACATCGAGGAAGTTCAGGAACNCTGNAATAATTTATTTTCCCAGCAGGAAATTGTGTCCTTATATCAAAGGTTTTGTCAACTTGACCGCAACGCCAAGGGATTTATTTCCGCAGATGAGTTCTTGTCCGTTCCCGAATTTGCCATGAATCCACTTTCTCAGAGGCTGCTCAAGATGGTCGACGGTTTGAATTTTAAAGACTTTGTGGCCTTCTTATCTGCATTCAGTGCCAAAGCGAGCGCACAACAAAAAATANAGCTTATTTTCAAAGTATATGATTCAGACCGCAATGGAAAGG…
GmaAffx.18053.1.S1_at	BE806995	At5g28900	1e-45	Signal Transduction	Protein Phosphatase		AGTTTATTGCTTTCGAGACTCGTGATCCATTTCTCATACGTCAGNAACGTGAGGATCCAAATTTGACNGAGTGGGATCGTTTTGCACATAGAGAGTATATTAGGCTTTCCATGGAAGAAGATGGTGAAGATNTGTCAAATGCCAGTGGAGATGTCTGGGAAGAATCACTTGAGGCCCCTTTCTGAGGTTAATTAAGATGAATCAAAGGCTATGGATTCCAGTCACTGAATATGCAAGCAGTATAATATTTGATGAGGCCATGTTGCGGTAAATGTCTACTAATAGTGTGCTCTAGAGAGGTTTCACCCAAATCTGTTTAGCAAACTAAGAATAGCTAGTGCCTTGGAC
GmaAffx.78968.1.S1_at	BE820570	At5g39670	2e-27	Signal Transduction	Calcium Binding		CAGCAAAACTTGAGAACTGCCACAAGATGATCAGGATCTTTGATACAAATCAGGATGGAAGAATAGATTTCATTGAATTTGTAAAAATTATGGAAAATCGCTTCCGCTGATTTGTCTGTTCTCTTGTTCGATTTATATAATATATGGGTTAGTTTAATATGTTCCCTGGGTTCTTGCTTCTTCATAGTTTTATCATCAATATTAGAATCTAACATATTGAAGAATAAGTACATTGGAAAGTTGTACCTGTTGNNNNNNNTAAAAAACTCTGATTGAAATGCTTTCTATGAGCTTAAAATCG
GmaAffx.23909.1.S1_at	BU549105	At5g66210	5e-63	Signal Transduction	Calcium Binding	Calcium Dependent Protein Kinase	GGCTACATTACACGTGCATCAATTGGAGGAAGACTCTGACAAGTGGCAGCAACTGTCACAGGCTGCTTTTGAGAAATTTGACCTAGATAAAGATGGCTATATTACTCCGGAAGAACTTAGAATGCATACATGCTTGAGAGGCTCCGTTGATCCTTTGCTAGAGGAAGCTGATATTGACAAAGATGGAAAAATAAGCCTACCAGAGTTTCGGAGACTTCTTAGAACTGCAAGCATGNGTTCTNAAAATGTTTCAAGCCCATCTGTTCATCGGCGGCNGAGNTTCTAGATTAGAGGTGCTTCAGAGGCTGAGATAAGTTTGGAGANACGANGTGGTGGAGTTCCTCTANGTAACTTATTGTGTGATTGTGCTGAGTCTCTTAAGACTATCTTCTATCATGC…
Gma.3877.1.S1_at	BU548211	At3g57530	1e-97	Signal Transduction	Calcium Binding	Calcium Dependent Protein Kinase	TGATGAGCATCTTCGCAAAGCCTTCCAATTTTTTGATCAGAACAAAAGTGAGTATATTGAGATTGAGGAGCTGCGTAGCGCCTTATCTGATGATCTTGACACAAACAGTGAAGAAGTTNTCANTGCAATTATGCATGATGTGGACACAGACAAGGATGGAAGGATAAGTTACGACGAATTTNCTACNATGATGAAGGCTGGCACAGATTGGAGAAAAGCATCAAGNCAGTANTCNCGAGAGAGGTTTGCCAGTCTNAGCCTNACGTTGATGAGGGACGGGTCATTGCATTTAAAC
GmaAffx.92868.1.S1_s_at	CF808593	At3g43810	5e-81	Signal Transduction	Calcium Binding		AAGAGCGATCATTTCCAATCACAATGGCAGATCAACTCACCGATGAACAGATCTCGGAGTTCAAGGAAGCCTTCAGTTTGTTCGATAAGGATGGCGATGGTTGCATCACAACAAAGGAGCTTGGAACTGTTATGCGTTCGTTGGGTCAGAATCCAACAGAGGCTGAGCTCCAAGACATGATCAATGAAGTAGATGCTGATGGGAATGGCACCATTGACTTCCCTGAGTTCTTGAACCTCATGGCTAGAAAGATGAAGGACACTGATTCTGAGGAGGAGCTGAAAGAGGCGTTCCGAGTGTTTGACAAGGACCAGAATGGGTTCATTTCTGCTGCTGAGCTCCGCCATGTGATGACCAACCTTGGGGAGAAGCTCACTGATGAAGAGGTTGATGAGATGA…
Gma.3234.1.S1_at	CD397450	At1g05500	3e-39	Signal Transduction	Calcium Binding		GTTTGGGACCACGACACATTCGGAAAGGACTATATGGGCAGATGCATATTGACGCTTACCAGGGTAATACTGGAAGGGGAATACAAAGAACGTTTTGTGCTAGATGGAGCCAAATCTGGCTTTTTGAATTTGCATCTCAAGTGGATGCCGCAACCAATTTTCCGTGATTCTTAGGTTTTCCTATCCCTCGCTATATATAAGTTTATAGAGGATGTAGTTGTGGCTGTGGATATCTGGACCATAATTTCTCAGACAGACATCGTGTATCTTAATAGCAATTACAGTTAGCAAATGTACATACGTCTTGTCAGGCATGGTAATAATGGTAAGGATATATGAATTTCTCTATCAGATTATCCTATAAATGCTCCATTGATGATGGGATGTAAAATTAACANG…
GmaAffx.26356.1.S1_at	BE059453	At1g30270	0	Signal Transduction	Protein Kinase	AtCIPKs	ATAGAGAAAGCTGCAGGACCCCTGGGTTTTGATGTTAAGAAGAACAACTGTAAGTTAAAGATTCAAGGTGAAAAGACAGGACGGAAAGGTCATCTATCTGTAGCCACTGAGATCTTAGAGGTGGCCCCTTCACTATACATGGTTGAGCTGCGAAAGTCTGAAGGAGATACTCTCGAATTTCACAAGTTCTACAAAAATCTTGCTACTGGGCTGAAGGATATTGTTTGGAAAGCCGAGCCTATCGATGAAGAAAAAGATGGTGCCAATCCATCGAAATAATTGTTATCCAAATTTCCATCTCCGTACGAAGTACAGTCACTAGTTGTGTTGTTATTCAGATTGGGCAATGGAGCAGTTAAAAAAAAAAAAAAAGAGTGGGTATTGGAGGATTCTGTCATG…
Gma.12998.1.S1_at	CD391509	At2g26980	0	Signal Transduction	Protein Kinase	AtCIPKs	GGACTGAACCTTGAAAACTTGTTTGATACNGAGCAGGGATTTAAAAGGGAAACAAGATTCACCTCAAAATCCCCTGCGGATGAGATAATCAACAAGATTGAGGAAGCNGCAAAACCTCTTGGCTNTGATGTGCAGAAGAAAAATTACAAGATGAGGCTTGCAAATGTGAAAGCTGGAAGGAAGGGAAACCTTAATGTTGCCACAGAGATATTCCAAGTGGCACCTTCTCTTCACATGGTTGAGGTACGGAAGGCAAAAGGAGATACATTGGAGTTCCATAAGTTCTACAAGAAACTTTCAACAAGCCTGGATGATGTTGTCTGGAAAACAGAAGATGATATGCAAATGCGAGAAACAAAGTGATATTGTTATTATCATTATCTTGTGTAATTTTCTTTA…
Gma.724.1.S1_at	BE658675	At3g50770	2e-13	Signal Transduction	Calcium Binding		GCCTAATCAATATTGGTCCCTTATTTCATATGTAGTATATGCATGTTTCTTGTGTATACGGTTCATATGGATGCTTCAATACTTGAAGTTTTATGTAAATATTTACATGGAGGCCACTGGAGCCAGTGCT
GmaAffx.92405.1.S1_s_at	CF808130	At3g18130	1e-168	Signal Transduction	Protein Kinase		GATGCGCATTCGGATTGGGTAAGTTGCGTCCGTTTCAGCCCTAGCACTCTTCAGCCAACCATTGTTTCTGCTTCATGGGACAGGACCGTTAAGGTTTGGAACCTGACCAACTGCAAGCTGAGGAACACCCTTGCTGGACACAATGGGTATGTGAATACTGTTGCTGTTTCCCCTGATGGCTCTCTCTGTGCCAGTGGTGGCAANGATGGGGTTATTCTTCTGTGGGATTTGGCTGAGGGTAAGCGTCTTTACTCTCTCGA
GmaAffx.19116.1.S1_at	BI968419	At3g14840	1e-131	Signal Transduction	Protein Kinase		TATGCACTAATGTGACTGCAGCACTTAGGCCAACCATGTCATCGGTGGTCAGCATGCTAGAAGGAAAAATTGTTGTTGATGAAGAGTTTTCTGGAGAGACAACTGAGGTATTGGATGAGAAGAAAATGGAGAAAATGAGATTGTATTACCAAGAGCTGAGTAACTCAAAGGAAGAACCATGGACAGCTTCATCTACTTCTGTAGCAGATCTTTATCCTGTGGGCCTAGATTCTTCTTACTTGGAG
GmaAffx.12831.1.S1_at	BE821709	At1g27190	1e-61	Signal Transduction	Protein Kinase		AATGAATTGTGTGGTTTCTCGCCCCAAGGATAGATGGTCTATGTACCAGGTTTATCATTCCATAAAGAGCATATNCNANGAACAGAGTTTCTTTGAACATGATGATGAATTTCCCTTGATCTTTGGTAAGCCAGAAAACGAGGTTGTGACATAGTTCTTGAGGAAGCATTATTGCAGTATGAGACGCTGATGAGAGATTGTTCTCACTGAGATT
GmaAffx.50094.1.S1_at	BU091503	At5g19010	0	Signal Transduction	MAPK		GAAAGAAGAAGCCTGTTCCTCTCTCGCAGAAGTTTCCTAATGCAGACCCCCTTGCTCTTCGTTTGTTAGAAAAAATGTTGGCATTTGAGCCTAAGGATCGGCCTACTGCTGAAGAGGCTCTAGCGGATCCATATTTTAAAGGCNTGGCNAAGGTTGAGAGAGAACCATCTGCTCAGCCAGTTACNAAGATGGAGTTTGAATTTGAGAGACGCCGGATAACAAAGGAAGATGTACGAGAGCTTATATACCGAGAGANTNTGGAGTANCATCCNAAGATGTTGAAGGAATTTCTAGAAGGAGCAGAGCCAACAGGTTTCATGTATCCAAGTGCTGTGGATCACTTCAAGAAACAATTTGCATATCTTGAGGAGCATTACGGCAAAGGGGGAACTGTTGCTC…
Gma.4062.1.S1_at	BI969642	At2g28930	1e-121	Signal Transduction	Protein Kinase		ACGAAGAGTCTTCCGTGTAATGGATCCCCGTCTCGAAGGTCAATATTCACAGAATCGAGCTCAAGCAGCAGCTGCGCTTGCTATGCAATGTTTTTCCGTAGAGCCTAAGTGCAGGCCGAATATGGATGAGGTGGTAAAAGCATTGGAGGAGCTTCAGGAATCAAAGAACATGCAGAGAAAAGGCGCTGATCATAAACAGCATCATGTACGCAATTCCGGCCCCGGCCGTACCAATGGTGGCGATGGTGGTTCAGATGCCCCTAGAAAGGCTTCTGCTTATCCTAGACCTTCTGCTTCTCTCCTCCGCGGTTGAGAGAATTTTGTGATGCGGCAAGTAGTAAAGCATATAACAAAATTCGGAGGTTTAGGTGTGGCTGGCATGAACCATGTTTATGTAAG…
Gma.4931.1.S1_s_at	CA852939	At3g51550	7e-07	Signal Transduction	Protein Kinase		CATTGGAGGTAGAAGCTTGGCTAGTGAAGACTCTGATGGGCTAACCCCTAGTGCTGTGTTCTCCCAGATNATGAATCCAAAAGGTCGTTAAGGTTATGCAGNAGTAACAACACTTTCANTACATACNCNGTCAACCCACTCAAGTTCTGTAGTNCAATCTGCTTTCACCAAATTTGAATGTTACTCGTTATTCATTTTCTTAATATTGCTATTCCTTTGTATGTTGTTTCTAATTTNTTATGATTATGTAAGTTGTAATTTGTGACCATGTTATATAAAGATTG
Gma.3862.1.A1_at	BE821784	At5g02800	6e-42	Signal Transduction	Protein Kinase		AAATGGCTGATCCAATGCTCCAAGGTCAATATCCTCCAAGAGGGCTATTCCAGGCCCTTGCTGTTGCAGCAATGTGTGTTCAGGAGCAGGCCAATATGCGTCCAGTTATAGCTGATGTTGTCACAGCTTTGAGTTACCTTGCTTCACAAAAATATGACCCGAATACTCAGACATTACAAAGCTCTCGCCTTGCTCCTGGTACTCCTCCAAGATCCAAGAGGGGATATTGATATGGAGCTTAATGTTTATTAGCTATATAATAGTCTGGTGAAAATTTCAAACATCTTACAAGTTATAGATTTGTAGATGTTAATACCAGTTGTCTTATGGTGGTGTTCTTTCTTCAGAGCATAGATGCTAAAAATGTTGTAAATTTTTGTTCTACCCTGGTGCACAGAA…
GmaAffx.56159.1.A1_at	BU547394	At2g45910	6e-37	Signal Transduction	Protein Kinase		CAATTTTGGATTCTTCAGCTGGAGAATGGAATTCCACCATGGCAACACGATTGGCTGAACTAGGATTGCAATGCTGCCAACTGAACAGTAGAGTCAGACCAGAGTTAACACCTTCTCTAGTGAGAGAATTGAAGCAGTTGCTTGTTTTAGAAGAGCGACCTGTACCATCTTTTTTCTTGTGTCCAATCTTTCAGGAAATAATGCATGATCCTCAAGTTGCAGCAGACGGATTTACTTATGAAGGGAAGGCCATAAGTGAATGGCTGGAAAATGGACATGAAACTTCTCCTATGACTAATTTAAAATTGACTCACCTGAATCTCACTCCCAATCATGCACTTCGACTTGCTATCCAAGGCTGGCTTTGCAAATCTTGAAGTTTTATTAATTCATTTATGA…
Gma.8366.1.S1_at	AW185494	At3g17850	1e-59	Signal Transduction	Protein Kinase		GGATTCTAGTGATGCTGATAGCTTAAGTGGCAGCAGTAGTTGTTTGAGCAATCGACAAGATGAAGTGGGAGATGAATGTNGGGGTCTTACCGAGTTTGATTCTGGCACATCTGTCAATTACTCTTTTAGTAATTTCTCCTTTAAGAATCTCTCCCAGCTTGCATCAATCAACTATGATCTCACCAAGGGATGGAAAGATGACCCGNCAACGAANTCTAGTGCATAGCTGTATNTATTANCCTNTGTCAAAGTNCAGAATTTGGTTTTCGACCTATGATCCAAGCAA
GmaAffx.1378.1.S1_s_at	BM093364	At4g03415	4e-48	Signal Transduction	Protein Phosphatase		CAACGCGATCATCAGCGGCAAGGATTCTGGTAGATTCTGCTGCTAGGGAGTGGAAACACAAATACCCTACATCAAAGATGGATGACTGTGCTGTAGTATGCTTATTTTTGGATGGGAAAATGGACTCGGAATCTGATTACGAGGAACAAGGCTTTTCTTCTGCAACCATCCAAAGCAACCATTCNGGTAACCCCATTGAGTCAGATGATGGACAAAANTCTGAGCCATCATTGCAAAGGAACTTCACTGTGAGATCCTCAGANGAAAATGAGACAAATGGAGCACTATCTGTTGATGTTGTTGA
Gma.4769.1.S1_at	AW310445	At5g06750	1e-108	Signal Transduction	Protein Phosphatase		ATCCACGAATCGGTATTGCAAGAAGACTTCTTAAAGCAGCTTTAAACGAGGCAGCTAGGAAAAGGGAAATGAGATATAAAGACCTTCAGAAGATTGGAAAGGGGATTAGGCGTTTCTTCCATGATGATATCACTGTGGTTGTTGTCTTCATTGACCACGAGTTGCGCGGCAAGAATGTTACAGTTCCTGATTTGTCCATCAAAGGGTTTATTGACACAGTTGGACCATCAAATTTTAGAAATTTGCGGGGATTGGAATGATCACAAGGTTCATTTGTAGCCAACAAACTTGACTGGCTGCTTCATTGGTCCAAAAGGAAGCTAAAAGAAATTCAATACTTCATTAGACATTTTTGCAACATCTAATTGNTGTTTATCTTGAACATTTCTTCTCACTTTT…
GmaAffx.21217.2.S1_s_at	AI748710	At3g15260	4e-47	Signal Transduction	Protein Phosphatase		ATAAAACACACCCTCTACGTGTCCACACTCTCTGATCACAACACACCCGCTTAATTAAATCTCTATATATAAACCCCTTCAGGCACTCCACTATGACGGGCANNGAAATTTTTCATAAGATGAAGGAAAAAGTTTTGGGNTCATCTGATCCNGATTCNGGTAAAGGAAAGAGCAAGATGAAGAAGNACATAACTCATGGCTTTCACTTGGTAAAGGGNAGATCAGGTCATGCCATGGAAGACTATCTTGTTGCTCAATTNAAGCAAGTTGACNACAANGANTTGGGTTTATTTGCAATATTTGATGGCCACTCNGGTCACAGTGTACCTGATTACTTGAAGTCTCATTTGTTTGATAATATCTTGAAAGAGCCTAACTTCTGGACAGAACCTGCTGAGG…
Gma.10933.5.S1_at	AW310411	At4g31750	1e-141	Signal Transduction	Protein Phosphatase		TGCGTTGTCGTTCGTTTTTTGTCAAACCAAGGTGCATCTTCTCATAGTAACTCTGGCTAAGTGTCCTTCACTCGAAGGCTAGTGTATATCTGGTGATGGATAAAAAAAAGACGGGATGTGGCAAAATCAGTTTATTATAGTAGGTCATAGGCATTCCTTGTAGCTATGTACCATGCAAGAATAGAAATCAAATTTGAACTCACTATGGCCCTCTAGCATAGAGCTATTCACACCATCCCCACATCCATAATTGAGTCCTACTTGTAGCTACGAAAAATAGTTGTGCAAAGAGTTTACAATGTTTTAATTATTTCACACACATGCTATTTGTACATGTGGTGTTGATCTTATTAATCCCCTCACTCCAAAACAAAATTCTCGTGTGCTTGGTTGAAGTTA…
Gma.5188.1.S1_a_at	AW349454	At4g31860	1e-150	Signal Transduction	Protein Phosphatase		GAACCAGCCTCAATCGTCTGCTCAATCATCTGAAGCTGATAGAAGTTCGGAGACAGTAGAATCGAAGTGAGAGAATTTCGAACCTGACTTGATGACTAATAGTCATCAATTTCTTACTGCATGTTGAAGCATTGGTGAGCTGAGGTTCTTGCCTTCTTGGGTACTATTTTATATCCAAATTTCAGGATGTTAATTCTCAATAGGGGGATTGTAAATTGGTGACAAACTAATTCATGGGGCTAGTATTGGCTTTTGTACATAAGTGTGGGTGTTCAGAATATGAAG
Gma.13075.1.S1_at	CD405748	At1g09160	9e-80	Signal Transduction	Protein Phosphatase		GTGTGAGCATGCTTGCTTCTACATTTGGGTGGTGATTGTCATTGGTGTGTTAAGAATGAGGTTGAGATAGCCATATTAGGTCTATTGGAGGTTGTTGCATGTTTGTTTTTGGCGTCTGCTCAGCTGTTGGACTAACTGATAGAACAGCAATGTTGTGTT
Gma.7239.2.S1_at	AI974076	At1g17720	1e-164	Signal Transduction	Protein Phosphatase		GAATAAATCTTTGGAACCTGGAAATTAGCAATCAAAGTTTTAATATTGTTGATGTAAAGCCTGCAAATATGGAGGATCTGACNGAGGTTATAACATCAGCAGAATTTCACCCTACACATTGTAATACATT
Gma.1143.1.A1_at	AW278604	At5g25510	2e-11	Signal Transduction	Protein Phosphatase		GGGACCATGACCCTCTGAAACTCTACCATGTTAATTGTTTCCAAAATTTCCTCCAGTTCACCCAGGAACATCACCTCTTTCTGACTGTTCGCAAGAAGATTGAGCGAGCCTTTGGTAAATACACACTGGAGATTAAAAATAATCTTGAGCGAGGAACTGCATTGCCTGACTAAGGTACTTCTGTAGTGGTGTGTTNATTATTTCGCATTGTTCTCATACTGATAAGTTTCAGTGGTGGATTGCACTTTTTAGAGTGCTTTTTGATCATGTAATATTATAGTCGAATATTTTGCNATGCACATATGGAGCNTTGCGGAGTTATTTTGAACTTCNAATATTATATGCTTGCTTGGGATATTGGTTCTTCTTAGTGGACTATTTCCA
GmaAffx.72708.1.S1_at	BG509139	At2g39840	9e-58	Signal Transduction	Protein Phosphatase		TAAAGCTCTTGGTTGGTTCACCCTTGTGCTTATTTTTTGTTGCTGAGAAAGAGCAAAGAAGAAGAATAAGAAGAAGGTTTTGATCGGATGCGATGAGCACACAAGGACAAGTGATTGATGAGGCGGTTCTGGATGACATAATCCGGCGCCTAACGGAGGTCCGATTGGCCCGACCCGGAAAGCAGGTTCAGCTCTCCGAGTCTGAGATCAAGCAACTTTGCGTCGCTTCCAGAGACATCTTCATTAACCAGCCCAATTTGCTTGAACTCGAAGCCCCCATCAAGATTTGTGGTGACATTCATGGGCAGTACAGTGATTTGTTAAGGCTATTTGAATATGGGGGTTTGCCTCCTACTGCCAATTATCTCTTTTTGGGGGACTANGTGGACCGTGGGAAGC…
Gma.11129.1.S1_x_at	BE657610	At5g26751	0	Signal Transduction	Protein Kinase		TAAATTCCCACAGATTAAAGCACATCCATGGCACAAGATCTTCCATAAGCGCATGCCTCCAGAGGCTGTTGATTTGGTATCAAGACTACTACAATACTCCCCTAACTTGCGGTGCACAGCTTTAGATGCCTTGACGCATCCTTTCTTTGACGAACTTCGTGATCCAAATTCTCGCTTGCCAAATGGCCGATTCCTTCCACCACTATTTAATTTCAAATCCCATGAACTGAAAGGTGTCCCAGCTGAGATTTTGGTGAAATTGGTTCCAGAGCATGCAAGGAAGCAATGCCCGTTTCTTGGCTTGTGAAGTGTAACAGAACTGCAAGTGTTGTTTCCATATGAGAATGCCGCGCTTTCCTTCTATTTAAAAT
GmaAffx.3560.1.S1_at	BU548232	At3g05840	3e-66	Signal Transduction	Protein Kinase		GTGCATGAATCCTAACTACACGGAATTTAAATTCCCACNNNNTNNNGCGCATCCATGGCACAAGATCTTTCACAAGCGCATGCCTCCAGAAGCTGTTGATCTGGTATCAAGACTACTACAATACTCCCCTAACTTGCGGTGCACTGCTTTAGATACCTTGACCCATCCTTTCTTTGATGAACTTCGTGACCCAAACACTCGCTTGCCAAATGGTCGTTTCCTTCCACCATTGTTCAATTTTAAATCTCATGAATTGAAGGGAGTCCCAGTTGAGATTTTGGTGAAATTGATTCCAGAACATGCGAGGAAGCAGTGCCCGTTTCTTGGCTTGTGATAATGTGAAAAATGTAACGAAACTGCAATAGTGTCGTTCCCATGTGAATGCTCCGTCATTCTCTA…
GmaAffx.92555.1.S1_s_at	CF808280	At5g55190	1e-120	Signal Transduction	Small GTPase		GACAACGTTCGTGAAAAGGCATCTTACCGGTGAATTCGAGAAAAAATACGAACCGACCATTGGAGTGG
Gma.15608.1.S1_at	CA782726	At3g13300	3e-88	Signal Transduction	Small GTPase		CAGATCCAAGGATTGCAGCACATGTGCNGCNAATATTAGATCAAGTGTCCCGAACACTGGGCCATNATCGGACTTTACCAACTACCTCCCCTTCTGAAGCGAGCACAATCCGCCTTCTCATGCATGTCATAAACTCGGTGTTGTTGAGCTGTAAATGACATTGTTGTATTTTTATCATGTGCAGAAAGTGTTGAGTATCAACTTTGGTTTGTATAGATATTTAGATAGTTTGGAGNGGGATGAAGTGAACTACTGTATGTAGTTGTTTTGGTACAACTGATTTGTGTGAAATAGTTTCACTTTTTTTNTNNNNNNNNNNNNNNNNNNNNNNNNNNNNNNNNNNNNNNNNNNNNNNNNNNNNNNNNACTTTATAGAGATATTATTATTGCCTTCACCCTG…
Gma.4861.1.S1_at	CD394162	At3g18140	1e-153	Signal Transduction	Small GTPase		GAGCCTCTTCACAAGCTGCAAGCACACAAGGGATACATNCNTCAAATGTCTTTTATCACCCGAGTTCTGTGAACCCCACAGGTACTTGGCAACTGCATCTTCTGATCATACTGTCAAAATATGGAATGTTGATGGTTTTACCCTAGAAAAAACTCTNATAGGTCACCAACGCTGGGTGTGGGACTGTGTCTTCTCNGTGGATGGNGCCTACCTTATTACAGCTTCCTCTGATACAACTGCNAGGCTCTGGTCTATGTCAACTGGTGAAGATATTAAAGTTTACCAAGGGCATCATAAAGCTACAATTTGCTGTGCCCTACACGATGGGGCTGAACCCGCANCTTCCTGAGATANTGGTCATAAAGTTNTTTNNNTTNTCCATCAGCTACATCTTGTTTT…
GmaAffx.22297.2.S1_at	BM271210	At1g62300	0.007	Transcription	Transcription Factor	WRKY	ACAAGCTCCTAGACCACCCTTACAACCAAGCCAACAGCCCTCACTTGCTGACACAGTCAGCGCCGCCGCCTCCGCCATCACCGCCGATCCAAACTTCACCGCCGTGCTCGCCGCCGCCATCTCCTCCATCATAGGCAGTGCTCATAATTCAAACAACAACAACAGCAACAACAACACAAGCCGGACTACCATTAGCAGCTTT
GmaAffx.92945.1.S1_x_at	CF808670	At5g07100	6e-08	Transcription	Transcription Factor	WRKY	CATGACCACTTCTTTCTCTGACCTTCTTGCTTCTCCCACAGACAACAACAAACCACCACATGGTGGTGGTGGTGGTTTGTCTGAGAGAACTGGCTCTGGTGTCCCCAAATTCAAGTCCACACCACCACCTTCTCTGCCTCTCTCTCCCCCTCCCATTTCTCCTTCTTCCTACTTTTCTATTCCTCCTGGTTTGAGCCCTGCTGAGCTTCTTGACTCACCTGTTCTCCTTAACTCTTCCAACATTCTGCCATCTCCAACAACTGGAGCATTTGTTGCTCGGAGCTTCAATTGGAAGAGCAGTTCCGGGGGGAACCAGCGAATTGTCAAAGAAGAAGACAAAGGCTTCTCAAATTTCTCCTTTCAAACCCAACAAGGACCTCCTGCTTCATCCACAGCAAC…
Gma.12895.2.S1_at	BM187616	At5g16880	2e-76	Transcription	Transcription Factor	MYB	GGTTCCCTGGCCGTGACAATGAAAGCTTGGCTCCAATTTTCACTCCTCCTCGTTCAGTGTCTTCTGCTCCGGAGGCTGATGTCAACCTTCAACAGCAGTTTGAGCATGATATTCCTGAGCAGTTTCATCATGATGTTCCCGTGCTTAGTTTTACGCCTGAACAGACAAAGGAGGCCCTTGATGTTGCAAGGAATAGCATTGAGCTTCTTTCCACTGTGTTGTCGTCTTCACCACAACAAGATGCTTTACAGGATGATTTGACCACCACACTTGTGCAGCAGTGTCGTCGGTCACAGACTACTGTCCAGCGAATTGTTGAAACGGCTGGGGATAATGAAGCAGTGCTTTTTGAGGCCTTGAATGTTAACGATGAGATTCAGAAGGTCCTCACCAAATACG…
Gma.12250.1.S1_at	CD411563	At1g29800	9e-46	Transcription	Transcription Factor	Zinc Finger	GTGGCTATGCTGCTTGTTATACCTACANCTGCAGTAAAGGTGCATTTGTTGGATGNTCACNTGAANGNAGTATGGTGANCTACTNGCACNCAAGAAAATTCCCGTTTCTATGGCAGCCAGTCTATAACTGCAACAGATATACTTTTTGGCTCGTTGCCTAGGCCACCTGCCGCTGCCATTCTCTATCGTGCACTTGCTGATTTGTATTCGAAGTTTGATGATTAATTGAATGGTTCAACGTCGCCTTTCATTCCTTTCTCCTTTTGGACATTGGCATTGAAGACATAGTTTGTACAGCTGCTAAGTCACACTCATTGTAAATGTTCATCGCGTCATTATTTGTCTTGTAAATATGTAAATGTTGATATTGTACACTCCACGTTGACCAAGATGGAGGGA…
GmaAffx.81266.1.S1_at	BF009919	At1g68360	1e-29	Transcription	Transcription Factor	Zinc Finger	AATACGAGTGCCAATACTGCTGCCGAGAGTTCGCNAATTCACAAGCACTTGGCGGACACCAGAACGCGCNNANGANGGAGCGTCAGCAGCTGAAGCGNGCGCAGTTACAGGCCTCNCGAAACGCCGCCGTTTCGTTCGTNCGGAANCCGATGATCTCCGCCTTCGCCCCTCCGCCGCACCTNCTGGCTCCGCCGGGGACCGTGGTGGTCCCGGCGGCACCTCCCTCGTGGGTGTACGTGCCACCACGTGCCGCGCCTCCTCCCTTCCACGTGTCAGNGTCGCACGGTTGTGCGTTCCCGTCGGCGCNTGGCAACAGCAACAACAACNGCTTCAGCAGCAGTAGTAGTAATAATAGTAATAACGTGACCATAACAACGGGTGTGAAATCTGCGGGTGCTG…
GmaAffx.86323.1.S1_at	BM887582	At5g25160	7e-07	Transcription	Transcription Factor	Zinc Finger	ACACCATCATGGTTGGTCAAGGCCAATCATTGATCAACAACCCGGAATAGCAAAGCTTGCTGTGCCAGATTTTCATCACAGAACAAAATCAGCATTATCAGCATCACAAAGCAGTGTTGGTAGGTTTGAAATAATAGTTAATAGTAGTAATACCATGTTGAATTCTGCAGCCAGTAATAAAGAAATCGGTGGATGTGTGGCTAGTGGTGGAACTTGTTTGAAGACTACTACTAATCAAGAAGAAATGAAGCACCTTGATTTGTCCCTCAAGCTCTGAAGTCTGAACCAAAGCCGCGATTTCAGCTCGAACCGTCAAGGTTTTTGGACTCTCAGAGACCACATCGTGATCACAATTGTGACTGCAATTTCCCACGATGTCAAGGATCGCGATGAAACTGT…
GmaAffx.56116.1.A1_at	BU544778	At1g12760	2e-34	Transcription	Transcription Factor	Zinc Finger	TTGCATCTGCCTTTCTTCTTATGATGATGGGGTTGAGNNAAGAGAACTTCCTTGCGGTCACCATTTTCACTGTGTCTGTGTGGATAAATGGCTGTATATTAATGCTACATGCCCCCTCTGCAAGTATAACATCTTAAAAAGTAGCAACCTCAGTCAAGAGGAAGTGTAGAAGATCGATGTCAGGAAAGTTTTTGGCGCCCATGTTGAGGAATCTGCACACTTTCGATTCACAGCCATGTTAATATACTTTGATACAGGCCTATACAGTTGCTCCTGCTGCCGTTTGCTGTTATCATGTAATGATAGCTTTTTTGATTGTTTGTAGTTATTGTGGCTTCTTACTGGTTGTGTATATCAGTGTTGTTCAGTGCATACCGGCTATAATTATCTCAAG
Gma.5669.1.S1_at	BE821741	At5g60170	8e-67	Transcription	Transcription Factor	Unclassified	AATATCGGATGCCTAATTCTATGGATGTGTTCAACAGGACATTTGGGATTTGAGATTGTTGGGTATATTGGCCATGGTAAAGCCAAGTCAGAAATAAACAAACAGAATTTTTCTGCATTGCCAAAGGTGATGGGGATGGCTCATGACATAACCTGTCTATTGGGCTACGAAAGGATGAAACTCTCGCTTATAGCTGCAGCTGGTTACTGTTCTTGATTTGCAGAAGCAAGCTGCGTTGAGATTTAAGAAATCAATCATGGATCGGAAAGTATTTGGCAGGTAGATCTTAGTTGAGTGGTTTCTCTTAGTACAGAACATGGAAACCTGTTGATCGATCGACTATCAAATAATCTCTCCTATTTTGTTAATGA
Gma.1869.1.S1_at	AW596927	At3g06190	2e-84	Transcription	Transcription Factor	Unclassified	TTGTTGCAAGGCCTGAAAATCTCAGAGCTGTGATGCAAACTGATGGTTTTGAGTACTTGAAGGAAAGTTGCCCNTCTGTTTTGACTGANCTTTTGGAGTATGTGGCTAGATTTACTGAGCATTCGGACTTCTTGTGCAAGCATAGGAATGAATTGATACTTGATGGCAGCGACGTAAATGGAAGGCGGGTGAAGCAAAGGCTATAGTGCTAAAGTGCAAACACTGACAAGTTCTCTGTACAACCCTCTACTCCTTGTTGCATTTAAAAATTTCCGTGAGAGCCACAGATAGAGGGAGATGATAAGCATTTATAGGATTAGTGGCAATTTCTAATTTTTTTTAGCTTCATGTCTAGGAGATGTAAATGTAGTTTGNTTTTTATGCTGTTGCAGGTCTGTC…
GmaAffx.2736.1.S1_at	BE057231	At5g20510	2e-22	Transcription	Transcription Factor	Zinc Finger	TATTGGAACAAAACAGCGAGGATCTGAATCAGGGAAGTATTCAAAGGAAACAAAGGACGAGGAGGAAGAGGTACTGGATGAAGAAGATGACGAGGAGCATGAGGAGACCTTGTGTGGGGCATGTGGGGAGCACTATGCATCCGATGAGTNCNNGATTTGTTGCGACATATGTGAGAAGTGGTTCCATGGCAAGTGTGTGAAGATCACTCCNAGCCAGGGCCGAACACATCAAGCAGTATAAGTGCCCCTCATGCAGCAATAAGAGAGCACGGCCTTGATATAGTTGAGAAGTGGGTCAGTCCTCACCCCTTGTAACTAAATCATGTTGGACGTCTAACTTGTTAGTGGCTTAGGCTTCCTTTGTCATGCCATGATGGTGTGGAATATGTATTCAGTACT…
Gma.4324.3.S1_a_at	AW598682	At1g34190	1e-55	Transcription	Transcription Factor	NAC Domain	AAATCCAGAGGATGCCAATCAAACTGTTGGTGAATTCTGGATGCATGGTGAAAGTAATCAGCNNNNNNNNNNAGGTGTTGTATATGAATCTGTTGGCTTTCCTACGGAAGGCAATAACAATCAAAGTAGCACTGTGGAAGATGTTGCTACAAGTAGCTTGTCCTCTGCTCTCTGGGCCTTTGTTGAGTCAATACCTACTACTCCTGCATCAGCTGCTGAAAGTGCATTGGTGAACCGAGCTTTGAATCGAATGTCTAGCTTCAGCAGGTTGAAGATCAAGCACACCAACATTGCTGCATCAGGTAAAGACACTGGAACTATGAAGAGAGCTGGCAGAAAGGGACTTCCATTCCTTTTCTTCTCTATTCTTATTGCTTTATGTGCTTTTTGTTGGGTTTT…
Gma.2702.3.S1_a_at	AW185294	At5g13180	4e-41	Transcription	Transcription Factor	NAC Domain	GAAGAATGGAGAGCTTAGATTGCCTCCGGGGTTCCGTTTCCACCCGACTGATGAGGAGCTGGTTCTGCAATACTTGAAGCGCAAGGTCTTCTCCTGCCCTTTGCCAGCCTCTATCATTCCTGAGCTTCATGTTTGCAAGTCTGATCCTTGGGATTTGCCAGGTTCCTTTCTATTTTCCATTCACACCCATCATCCCCTTTCTCTTTCTCTAATTTCAATTCCATGCCCCCATTTTTAGGTGATTTGGAGCAAGAGAGATACTTCTTTAGCACCAAAGTGGCCAAATATCCCAACGGAAATCGC
GmaAffx.2026.1.S1_at	CA799083	At5g64530	2e-49	Transcription	Transcription Factor	NAC Domain	ATGTTTGATGTGCTTCCTGATTATGTATGAAAATATGTATACTGACTATTTTTGGTTGTGATTTTCTTTTGGATGATCTGGTAGAGGAAGAAGAATCTGATAGACGATATTCTTGCATTATCCAATTGGTTTTGATACCAGCAGCAGGGGCTTCTCCCACATGGAACACAAAATATTTCTTCATGCCAACTCTCTTGTTGCTTGTGCTTGAAACCACTGGTTCTTCTATTCCCGTTGGTTTCCAATACCCATTTCCAGTGACCCTATTTTGTGTCCTTCTGCTGTAGTAGTACCATTGGTTCCCCTCTGCTAAAGCTCTACCATCAAGTTCCCATGGATCATATGGGTAGACCTCAA
Gma.593.2.S1_a_at	CA800286	At1g74840	6e-38	Transcription	Transcription Factor	MYB	ACCACCGACACGGTCTCTGCAATTCCAATGGAGGGAGAACAGGTCCAGAATCAAGACACGCTGTCTCATTCACAACAACAATCACCCTTGTTNCCTGCTGAAACTAGCAAAATCAATGGGTTTCCAATGATGCCAGTGTATCAGTTTGGGTTTGGTTCTTCTGGAGTGATTTCAGTCCAAGGTGGCAATGGAAACCCAATGGAAGAACTCACTCTGGGACAAGGAAACGTGGAAAAACATAATGTGCCAAACAAGGTCTCTACAGTGTCTGATATCATCACCCCGAGTTCTTCTAGTTCTGCCGTTGACCCACCGACACTGTCCCTGGGGCTATCCTTTTCATCTGACCAAAGACAGACATCATCAAGACATTCAGCTTTACATGCCAT
Gma.10456.2.S1_a_at	AW185209	At5g47390	1e-112	Transcription	Transcription Factor	MYB	AAAAGACGGTCCAGCTTGTTTGATATTGTTGCAGATGAAGCAGCTGACACTGCAATGGTACAGCAAGACTTCTTGTCTGCTAATCAGTTACCCACTGAAACAGAAGGCAATAACCCCTTGCCAGCTCCTCCTCCCCTCGACGAAGAGTGCGAATCCATGGATTCCACAAACTCAAATGATGGAGAGCCTGCCCCATCAAAGCCAGAAAACACACAGTCATCTTATCCAATGTTATATCCTGCATATTATTCTCCGGTGTTCCCGTTTCCTCTGCCCTATTGGTCAGGATACAGTCCAGAGTCCACCAAGAAGGAGGAGACACATGAAGTACTGAAGCCAACTGCAGTTCATTCTAAAAGCCCTATCAATGTTGATGAACTGGTTGGCAT
GmaAffx.15471.3.S1_s_at	BE346777	At3g46130	3e-38	Transcription	Transcription Factor	MYB	TCCACCCCGATCTCAAACGAGGGAAGCTCACACCCCAAGAACAACACCTCGTCATGGACCTTCATTCCAAATGGGGAAATAGATGGTCAAGAATTGCTCGCAAGCTACCAGGGCGCACTGACAATGAGATTAAGAATTATTGGAGGACTCACATGAGAAAGAAAAAGGCTCTGGAGAAAAAGCATGCATCAGCATCAGCATCATCACCTGTTTCTTCTAGTTGTCAATCTTCA
GmaAffx.15471.2.S1_at	BI784829	At5g59780	1e-34	Transcription	Transcription Factor	MYB	TAAGTTATACATGAAGCACCCCTTTAACCACCTCACTTTGTTGTAGGTTTGAATAGAACAGGTAAGAGTTGCAGGTTACGGTGGGTTAATTACCTCCACCCCGATCTCAAACGAGGGAAGCTCACACCCCAAGAAGAACACCTCGTCATGGACCTTCATTCCAAATGGGGAAATAGGTTTGAGAACCATGCAGAAATAATTAAACTATAAGCTACCTACCTTCCAATCATCATCACTCATAATTTTAATTAATTTTTTCCTACCATACAGTACTATTAGTATTAATTAGTTCTTTGTCTTATGTTTTTTTTTTTTTTTATATAGAATAGGATATCAAAAGATTTATAATAATTTATATACATTGAGCTAGATCGTTTGACACCTTATTTTGTTAATTAG…
GmaAffx.19793.1.S1_at	BU547638	At3g20740	1e-108	Transcription	Transcription Factor	Polycomb group	GAGGGTGTAGTTGACATCCTTCAGAAATACCCTGTTCCTGAGTGTGATATCTGGTTCATCAAGTTTTCTTGTGATTTCCATTTCAACTTAGCCGCAGTGGGTAACAGGGAAGGGAAGATTTTTGTTTGGGAATTGCAGTCAAGTCCTCCTGTACTTGTTGCAAGGTTGTCACATCCTCAATCAAAATCTCCAATCAGGCAGACTGCTACGTCCTTTGATGGAAGTACTATATTGAGTTGCTGTGAGGATGGGACAATATGGCGTTGGGATGATGTTACAAACTCCCCAGACTAACTTATCACATACTATATCAATCTGATGTACCTATATCACTGAATAAATCATTAAGTTTAGTCTGTGAATCCGCGAGTGCGTCCTCAAGCTAAGTTAATGTTTGTT…
Gma.984.1.A1_at	BF219561		3e-11	Transcription	Transcription Factor	Unclassified	AAAATGACCTTGATAGACCTATGGATCACTCTTTCTTTGGATCACCCCTCAGTAGCATGTCATTAGATTTTGGAGGACTCGGCAGTCCATTCCATTTAGATGATTTCATGTGTGATGATGAAATGATACAATACTTTGGAGCATAAATTATTGAAACTGCTAGCTCAGCAGGGACCGAACTAGAAAAATTCCAGCACCTGTTGCTTCTCTGGGTTATGGTTCCTAGATTGGTATTAGTGTTTATGGAGTTAGAGATTGAAAGATATAATATTAAGAACGTTAACAAGTCATAAGCACAGGTCCAGAAGAACTGAAGCATGAATTCCGTTTTATTGATTACCCCATTTCCATATCAATAAATATGTTTTGGGGTTGTATGTAAACTTGTCAATTGATGGA…
Gma.9522.1.S1_at	AW307593	At1g17520	2e-41	Transcription	Transcription Factor	MYB	GAGGCTTGTTAGTCAAGGGAAACTTGAAAAGGTACNAAATGGTTACAANGTGAAAAANGAAGCCTCCTNGGGGACAAANTCACCTTCACCAAAANCAAAGGATGTCCGGCCNCCACAACNCACAACNGCAATCNCCAGCTTCTNTCTTNATGACTAATGACACAATAAAGGAAGCTGCGGATACTGCAGCCTACAGAGTTGCTGATGCTGAAAGTAAATCATATCTGGCTGCAGAAGCAGTAAAGGAGGCTGAAAAAATATCATTGCTGGTTGAACATAGTGATTCAATGTTACAGCTAGCAAAAGATATATATGAACAATGTTCCCGTGGTGAAATTATCCTCTTGGCTTAAGATGGTCTAAGTAAGGTCTATAAATAGATTCGTCCTGATGTTGGTT…
Gma.3712.1.S1_s_at	AW507983	At3g48530	1e-153	Transcription	Transcription Factor	Unclassified	TGCTCCTGAAATCTACCATGATTATAGATCTATTACAGCAAAAGACTTCCTGACAGCCNTTAGAAGCTACTTAGAGAAGCATGAAGGGGCCTTTCCAATGTCAGGTGACCTGATTACATGCAATAAGNATTGCACAATCAAAGAATTGATTCAACTGCTTGACCATGAGAAGANTCATAGGGTCTACGTTGCTGACAATGANGGGAATCTNGAAGGACTAATCACACTAAGAGATATCATCTCAAGGCTAGTACACGAGCCTCGTGGCTATTTTGGTGATTTCTTTGATGGGGTTCTCCCAATGCCTCCAAACAGCAGGGTTTGAAATGCTTNCAGGAAGAATAAGTTCTATTCCATAAGTAACAAATTGATGTGTNNTTCTCATCAGAGCTGACGACA…
Gma.6642.1.A1_at	BE610052	At1g08320	7e-47	Transcription	Transcription Factor	Basic Leucine Zipper (bZIP)	ATGTCGATTGCTGACAGTCCGTCAAGCAGCACGGTGTTTTCTTGTGATTGGAGAGTATTATGGCCGTCTTAGAGCCCTTAGTTCTCTTTGGGCATCAAGACCACGAGAGACATTGATAAGTGATGATAACTCATGCCAAACAACCACGGAATTGCAAATGGTTCAATCTTCTCAAAATCATTTCTCAAGTTTCTGAAATACATATATATATATTGTGTAGTAATTGAAACCCGGTGCAAGTGGATTTCTTTGGGCTGCTTTAGAAGGAATGGAAAGAGTGTCAGCGTCATCAAAGAATTAATATCNNNTTTTTTTTCCTTTCAATCTTCTGCTCTTGTGTCTCTTATGTTTTGTTATAATTAAATGGAATCCGAGTTTTATGTGAATGACGAGGAAGCT…
Gma.10890.2.S1_at	BI426453	At4g34590	4e-33	Transcription	Transcription Factor	Basic Leucine Zipper (bZIP)	TTGTTCTTGTTTAGTGTCTGGGTCCTGCGAACTCCAAGTACAAGAAGGGTCAATTTTTGTTTTTCTGTTAACTTTTGATTACTATGGCTTGTTCAAGTGGAACATCTTCAGGGGCGACGTCGTCGATGCTTCAAAATAACTCAGGTTCGGAGGAGGAGCTGCAGGCACTGATGGAGCAGAGGAAGAGGAAGAGAATGATATCGAACCGCGAATCGGCTAGGCGATCTCGAATGAGGAAGCAGAAGCACTTGGATGATCTAGCATCGCAGGTGACTCAGCTCAGGAACGAGAACCACCAGATTCTCACATCGGTGAACCTCACTACCCAGAAGTACTTGGCGGTTGAGGCTGAGAACTCTGTTTTGAGAGCACAAGTGAACGAACTCAGCCACTGGTTGG…
Gma.7045.1.S1_at	AF532621.1	At4g34590	1e-32	Transcription	Transcription Factor	Basic Leucine Zipper (bZIP)	AATAATACTGCCCTCTCTATGTTATTATTCTCCCCAAAAA
GmaAffx.86781.1.S1_at	AW620821	At1g61700	7e-35	Transcription			TATTAGAGTGGGTTCGTTTCTTCCTCTTTCGATTTCATCATCTTCTCATTCTCTGTTAATTCGTTTCTTACATCTTAAAAAACAATATAAAGANNGGCGTGGTTTTGTTGTGAGTACTGAGCTGAGAAGAGGGAGAAGATGATCATCCCCGTTCGTTGTTTTACCTGTGGAAAGGTAATTGGAAACAAATGGGATACCTATTTGGACCTTCTCCAGGCAGATTACAGTGAAGGAGATGCACTGGATGCATTGGGACTGGTTCGGTATTGTTGTAGGCGCATGCTTATGACCCACGTTGATCTCATTGAGAAGTTGCTCAATTACAATACTTTGGACAAGTCTGATCTCAATTAAGAAGAAGGCTTGAGGAATAACAGATGACCAAGATGCTTCTGTTGT…
GmaAffx.90130.1.S1_s_at	CF805855	At5g65670	7e-34	Transcription	Transcription Factor	AUX/IAA	CAAAAATAGGTCTTCTTCTTCTCTGATCTACCAAAGCTTCAAATTCTCCTTAGTTTGGTTTGTCTGTGAGTTTGGAGTGTAATGTCGCCGCCGACGCTGGTAACGGAGGAGGAGGGGCGGAGCACCGTGGCGTCCGATTCTTCGCAATCCTTGGACTGTTTCTCTCAGAATGGTGCTGGATTGAAAGAACGGAATTACTTAGGGTTGTCTGATTGCTCATCAGTGGATAGCTGTGCCTCTACTGTGCCAAGCTTGTGTGATGAGAAAAAGGAGAACATGAATTTGAAGGCTACAGAGCTGAGGCTTGGTCTTCCCGGATTCCAATCGCCTGAAAGGGAACCGGATCTTTTCTCTTTAAGCTCACCAA
Gma.9135.1.S1_at	CA802445	At5g46760	2e-50	Transcription	Transcription Factor	Basic Helix-Loop-Helix (bHLH)	GGACGTGCACCACGCCAACGTAAATTTGGTCAACGATATGACCATGCTACAAGCAACGGTGAAGATGGGAAGTAGGTTTTACACGCAGGAGCAGCTTCGTGCGGCTCTGGCGGCTAAGGTTGGGGATGCACGATGATGTTGGCTCTGCACTTTGCGGCAGCGTTTGAGATTATGTGTGNNTNTGNGTCGTGTTATTAGCTAGCTAGCTCTTTGTAAGTTGTGCTGCTCTGGGATATTTTAAGCCTTCCCGGTAGCTGTTTCTGTAAAATTATAAGCTTTTTTTCTTTATTGGGTAGCTTAGTATTGAATTTTGAGGTAATCAAATTGGGAAGCTCCATGGAGTAGTAGAACTAGCTAGGGACACTTTTCATCAAATCTGTGGGTGGAGTGGAGATAGCA…
GmaAffx.92127.1.S1_s_at	CF807852	At1g46768	1e-39	Transcription	Transcription Factor	AP2/EREBP	ATAAGCTCAAGAATCAACACCGCGAGAAGCAGTCGATGAAACCTTACCGTGGAATAAGGATGCGGAAGTGGGGGAAGTGGGTGGCGGAGATCAGAGAACCCAACAAAAGGTCGAGGATATGGTTGGGTTCTTACACGACACCCGTGGCCGCCGCACGTGCCTACGACACCGCTGTCTTTTACCTCCGGGGTCCCACCGCGCGCCTTAACTTCCCCGAACTCTTGTTCCAGGACGACGACCAGGAGGGCAGTGATTCGGTGCAGCACGGCGCANCAGGGAACATGTCCGCTGATTCCATTCGCCGAAAAGCCACGCAAGTCG
GmaAffx.765.1.S1_at	BU082671	At5g41800	3e-70	Transporter			ACATTTTGAAGAGTCTGCTGCCAGATAGTGGACCTCCTTTGGCTCCAACTTGGGTTCTTGGACTTGCAATCATCTTTGTTCTTCTTCAACTCTTTGCCATTGGTCTGGTTTATTCTCAAGTTGCTTATGAGATAATGGAGAAGAAATCAGCTGATGTGAGGCAGGGGATGTTTTCCAAAAGAAATCTCATTCCTCGCATAATTCTCCGAACAATTTACATGATATTCTGTGGGGTTTTGGCAGCCATGCTACCATTTTTTGGAGACATTAACGGTGTGGTTGGTGCTATTGGTTTCATCCCTCTAGATTTCATTTTGCCTATGCTTCTATACAACATGG
Gma.7779.1.S1_at	BU550200	At2g47160	3e-11	Transporter			TCTCATTTAGTGCTCGCGTGGGTGAGTTCAAAACTGAGCAGAGTCCACGATCTGGTGCAAGAGGTCCCCTCAGTCCAAAGGCAGGAGAAGTGAGATTATCAAATCTGGGAAGAAGTCCACTTAATCCAGATTCAAAACAGCAGGACCAAAACTAATAATTAAACGTAGAAGATTGCAGTCATATGCCTTAGAAGGACTTTATAGGAGGCTTATTTGTTGCTACATTTCCATTCTAGTTTGTTCTTTAATTTTGCTTGTCATGGTTGTAACTTGTAAAGTCCTTTCCCTTGTCCCATATTCGACAGATATGAGATATGTAACAAAGTGTGGCGCTTTCCTATATCAATTGTA
GmaAffx.91491.1.S1_s_at	CF807216	At3g08580	6e-15	Transporter			CTTTCTGAGCCCTACAAAGGTATTGGTGATTG
GmaAffx.92457.1.A1_s_at	CF808182	At3g08580	2e-22	Transporter			TACTGTGCGTAGAAGAATGATGATGACATCTGGAGAAGCTGTAAAATACAAGAGCTCTTTGGAAGCATTCAAGATAATTGTCGCAAAAGAGGGTACTAAGTCACTCTTTAAAGGTGCCGGTGCAAACATATTACGTGCTGTTGCAGGTGCTGGAGTGCTCGCTGGTTATGATAAAGCTACAGCTCGTCTTGTTCGGAAAGAAATACGGTTCTGGTGGTGGAGGTTAATATACAGATAATGACGACGACAACTATCTGAGGCAATGATGTTGCTTCCCCTTTGC
GmaAffx.27787.1.A1_at	BG789758	At1g17840	2e-20	Transporter			TCCTAGGCCATTTTGGAAATACCCTATGTTCTATGTTGCATTCCATAGATATGCCTACCAAGGATTGTTCAAAAATGAGTTTGAAGGACTAAGATTCGCTACAAATAACGTTGGTGGTGGCTACATTAGTGGTGAAGAGATTCTAAGAGATATGTGGCAAGTGAACATGAGTTACTCAAAGTGGTTTGATCTTGGAATCTTGCTAGGGATGATTATTCTGTATCGTGTTCTCTTTTTGATTAACATCAAAACTACTGAGAAGCTGAAGCCAATCATTGTATCATTCATGTCATCATCAAGGTCTTCACCTAAGCCANCAATACAGATCATGCAGAATCCCAATGCAACTCCTTTACAAGAAGTTCAAGTCATATAAAATTGAAGAATCTGTAGGTTCAA…
Gma.3858.2.S1_s_at	BI321280	At1g67940	1e-87	Transporter			AAGTTGCTTCTAATGGCCGACCTGGATGCTTCTTTCATGGATAAGTCCGGGGCTGAACTCTCTGTCGGTCAAGCTCAAAGAGTTGCACTTGCTAGGACTTTAGCTAATTCACCCCAGGTTTTGTTGCTGGATGAGCCAACTAGTGCCTTAGATCCAATATCGACAGAAAACATAGAGGATGCCCTGGTGAAGCTGAACAAGAATCAGGGCATGACAGTCATCATGGTCTCTCATAGCATCAAGCAAATCCAAAGGATCGCTCACATAGTGTGCCTGCTTGTTGATGGTGAAATTGTTGAAGTTCTCAACCCTCATAATCTC
GmaAffx.75214.1.S1_at	AI437929	At3g59140	3e-61	Transporter			GCCAGCGGCTGGTAGAGTACAAATAAATGAATTGCAGATACGTTACAGGCCTGATGCACCACTAGTACTTCGTGGAATCACATGCACATTTGAAGGAGGTCACAAAATTGGTATTGTTGGCAGAACAGGCAGTGGAAAGTCTACTCTTATAGGCGCCTTATTCCGTCTAGTGGAGCCAGCAGGTGGAAAAATCATTGTTGATGGAATAGACATTTGTTCTATTGGACTTCATGACTTGAGGTCACGCNTTGGTATTATACCTNAGGATCCTACTCTTTTTAATGGGACAGTCAGATACAATTTGGACCCTTTATCTCAACACTCTGATCAAGAGATATGGGAGGTTCTAGGAAGTGTCAGTTGCAAGAGGCTGTCCAAGAGAAAGAAGAGGGATTAGAC…
Gma.17512.2.S1_at	AI941258	At5g13450	3e-59	Transporter			AGAACTTCCTTGTTATTGTTGCTGAGAATGGAAGGCTTAAAAACATAGACACCATTGCAAAGAGGTTTGCNCAGTTGTCAATGGCATATAAAGGAGAAGTGCAAGCAACTGTGACCACTGTTGTTCCTCTTCCCCCTGAAGAGGAAAAGGCATTGAAGGAGACTCTTCAGGAAATAATAGGTTCTGGAGCNAAGGTTCATCTTGAACAGAAGATTGATCCAAGCATACTTGGTGGNCTTGTGCTTGAATTTAGCCAGAAGGTCTTTGACATGTCAATTAAGACCAGGGCACAACAGATGGAGAGGATCCTCCGNGAGCCNGTNTCNATTGCCAACATCTAGAAGACNANANTNNCTCCTGACAATCTGTGTTATCATGGTTTAA
Gma.3412.1.S1_at	BQ628088	At3g47950	6e-31	Transporter			ACGTGAACTTCAATGGGCACATGCACAAAGAACATTACATGGATTACAACCAGCTGACACCAAGTTCAATGAGCGTACACATGTCAGTGAACTCAATCAAATGGCCGAAGAAGCTAAAAGGAGAGCTGAAATTGCAAGGTTGAGAGAACTTCATACACTAAAAGGTCACGTAGAATCAGTTGTGAGATTGAAGGGGCTTGACATAGACACAATTCAGCAAGCATACACACTCTAAAGATGCTTAATATATTTGCATACTTATACTGTAAAGAGTTACATTCTAATGTTGCTGAAGAACCATATAATGTAATGATCACACACGTTCTGT
Gma.4014.1.S1_at	BQ453861	At5g62670	9e-74	Transporter			AAGATGTTCACCGAGCGCACACATTTCAATGAACTCAATCAAATGGCTGAAGAAGCTAAAAGGAGAGCCGAAATTGCAAGGCTGCGAGAACTGCATACACTAAAGGGGCACGTAGAATCAGTTTTGAAATTGAAGGGGATTGATGTAGACACAATTCAGCAGGCATACACAGTCTGAATATGTTTTTTTTTTTTTTTTTTTTTATATATATATTTGCATACTGATACTGTAAAGGGTGGGGGCACNATCCAATGGTGCTGACGACTTCTGAGAGGAATAGAACCTAATGATGTTTACACTCGAGTTGAGTTCAATGTCCTCTCACCGTTTTGAGCACTTAAAAGGAGTGCTTTGTAAGGTCTATTTACATATGCTTCTTGTTTCCTGTGGTCANNANAN…
Gma.16198.1.S1_at	AW306344	At1g55730	2e-51	Transporter			AATGCTGCAGAACATGCCAGTGCTATCATGTTTGCCGTGAAGGACAAGCTTGATATCACTATTGGAGTTGCTATTGGATCATCTACACAGATATCTATGTTTGTGATCCCTTTCTGTGTGNTTGTTGGATGGTGCATGGGAAAAGAAATGGACTTAAATTTTCAACTATTTGAGACTGCCACACTTTTTATCACTGTGTTAGTAGTTGCATTTATGATGCAGGAANGAACCTCAAATTATTTTANAGGGTTGATGCTTATACTATGCTATCTAATAGTTGCTGCCAGTTTTTTCGTACATGTAGACCCTAAAAGTGGTGATGACTAAATATTTAGTGTAGGTGTGGCAGTTGTCAATGCTGCATTTCTTTACCACTTTCTGTAACAAAAAGGTAGTAAG…
GmaAffx.52801.1.S1_at	BE822362	At1g63440	9e-40	Transporter			AGGCTGCTGATATTGTCCTCATGAAGAGCAACTTGGAGGATGTCATAACTGCCATTGACCTTTCCAGAAAAACATTTTCCCGTATACGCCTGAATTACTTTTGGGCTTTGGGTTATAACTTGCTTGGCATCCCAATTGCTGCTGGAGCTCTTTTCCCTTCTACAAGGTTCAGATTGCCACCCTGGATTGCTGGGGCTGCTATGGCTGCCTCCTCTGTCAGCGTTGTTTGCTGTTCTCTGTTGTTGAAATATTACAGGAGACCCAGGAAGCTAGACAACCTTGAGATACGTGGCATAA
Gma.7773.1.A1_at	BU550115	At1g08350	7e-61	Transporter			GTTCGCCATATATACCACGATGTTAAAAGAGAGTGAGTTACCTATCTCAGAAGCAAAAGCAATATTGGTTATAATGCAAGGGTATCCCTTCCTTGAGTTATGGACTACCCTTTGGAAAGTCTAGTGTACACAGTATGATGTAACGGTATCCCTTGAATTTTTTTAGTTAAAGGACATTTGTGCAGACAATGTATCCTTTATTTTACTTTTCTCAACTCCATGACTGCACATTTTGGAAGAGGCTTCCTGTGGTGGCACGTTTTACCCTGGGAAAAGAGATGAGTGGAATGACATTTCTAAGAAGGATTAAGTGTCTATTTTTGTTTTGAAGTTTATTAGAGTTGATTTTAAATCCTTAAATATAATTAAAATGTGCCAAAAATAATTCCAGCCACCAAT…
GmaAffx.82435.1.S1_at	AW203405	At1g14670	1e-115	Transporter			TTCAGATCCGCGGTGAGGAAGGACTACTACTTCCAGATGTACTACGACGACCTTCCNATTTNGGGNTTCATAGGGAAGGTNGACAAGGAAGGGAAGGACCCCAGTGATTATAGGTACTTCCTGTATAAGCACATTCACTTCGACGTNTTCTACAACAAGGACAGGGTCATNGAGATCAANGTGCGCACCGATCCCAATGCGCTNGTGGATCTCACCNAGGATNCTGAGGTTNANGCCGAGTTTTTGTACACGGTNAANTGGAAGGAGACNAACACGCCNTTCGAGAAGAGGATGGACANGTACTCNCAGTCNTCNTCGCTGCCGCATCATTTGGAAATCCACTGGTTCTCGATTATCAACTCNTGTGTGACNGTGNTGCTCTTGACCGGGTTCCTCGCC…
GmaAffx.90654.1.S1_at	CF806379	At2g01970	2e-31	Transporter			TTACTACTATGCACGCTCCGACATGTCTGGATTC
Gma.1806.1.S1_at	BI971557	At2g23980	1e-124	Transporter	Ion Channel Families	Cyclic nucleotide gated channel family	TCCGTTTTTACTCCCAACAATGGAGGACCTGGGCTGCATGCTTTATTCAAGCAGCATGGCGTCGGTATTCCAAAAAGAAAATTATGAAGCTTCGTCAAAAGGAAGATGAGTCAGACGGAGCTCATGAAAATGTTGGTGGCAGTTCCTACAGCTTTGGTGCTGCCTTGTTAGCCTCAAAGTTTGCTGCGCACACNCTACGTGGTGTACATCGCAATCGACTTGCCAAGACTGCCAGGGAGTTAGTGAAACTACAGAAACCCCCTGAGCCTGACTTCTCTGCAGATGAT
Gma.10847.2.S1_a_at	BE800382	At2g03530	9e-50	Transporter			TGGACTTTGCTTCTCTATGTTCTCACCAGCATTCAACATAGCAACAAATGACCAATGGAATACTTTGAAAAAAGGGGTTCCCCATTTGACAGTTTATACTGCATTCTTCTATTTTTCAATATCTTGTTTTGTTATTGCCATGATTCTAAACATCACCTTCCTCTACCACCCTGTCCTAAACCTACCCAAGTCATCATTTAAGGCTT
GmaAffx.3548.1.S1_at	CA851347	At5g58070	1e-08	Transporter			TCTGGACATAACTTTGGTTAATTTTGAATCCTAGATATTANGNNGGAAACCCCATCTGGATGATGAGATCTACAACNAGCTTGTTCAGAGAGCTAAGNATGTAGGATATGATGTGAGCAAACTCCNCAAGACCCCACAGAGCGATCCTCCACCAGAGGAAGAAGGCCCTGATGACACCAAAGGCATTTGGTGGCTCAAATCCATTTTTGGAAAATAGGCCTNNNCCATNATGATATATAATTTATNANAATGAAAATGTATTTCAATTNCATNNNATGNAATGANTAGACAGATNANGAANNTTNANTTGGGCNNTTTNANNNAGTTAGAGCAAACTCAGTTATATATGTATTGGCTTGCTCTGTAATATGTATATAAATTTTTGTGTGGTGTGGCACT…
Gma.1906.1.S1_at	BI095213	At3g18830	7e-22	Transporter			ACCACAAGTGGGGTTGTCTCAATGACTTTTTTGTCCCTCTCTGAAGCCATCACCATTGGTGGAGCTTTCTTCCTTTATTGTGGCATTGCTACCCTTGGGTGGATATTCTTTTACACCCTGCTTCCTGAGACTCGGGGTAAAACGCTCGAAGACATGGAAGGGTCTTTTGGTACTTTTAGGTCCAAATCCAACGCCACTAAGGGAGTAGAAAATGGGAATGGCCAAGTANCACAAGTCCAGCTAGGGACCAATGTCCAAACATAGACAAATGAGCATTGGGACATCCA
Gma.3167.1.S1_a_at	CD400867	At3g27080	2e-53	Transporter			AAGGTTTATTTTGATAAGGCAGCTGTGTACTTTCAGCAAGCTGTTGATGAGGATCCTTCAAATGAACTTTACCGCAAATCATTGGAAGTGGCTGCTAAGGCTCCTGAGCTGCATGTAGAAATCCATAAGCAGGGATTTGGTCAGCAGCAGCAGGCGGCAGCAACAGCTGGATCTTCTACTTCTGCTTCGGGTACAAAGACTCAGAAGAAAAAGAAGAGCAGTGATCTGAAGTATGACATATTTGGATGGATAATTCTGGCAGTCGGCATTGTTGCATGGGTGGGATTTGCAA
GmaAffx.91106.1.S1_at	CF805636	At3g21690	1e-131	Transporter			CTAGCCGGCGTAGTGTTGACCGTGATATACGTAT
GmaAffx.42701.1.S1_at	BI317008	At5g40780	1e-23	Transporter			GCGTCATGTGGCTTGCGATCTACAAACCAAGGAGATTCAGCATGTCTTGGTGGGCCAACTGGATCTGCATTGTGTTTGGCCTATTGTTGATGATTTTATCACCAATTGGAGGANNNAGGTCAATCATAATTAGTGCCANGGACTACAAGTTCTACTCATAAATTCATTCCTAACTGAGTCAATGATGGGAATCTGAAGCATGCAATTGCAAATACAAGAAGGGAATGAAAGCTCAATAAAAGTCATNNGTGTTATAGAATCTGGTTTATCTTAGGTCGCTGGGTGCTTTAACTATAGAATGCAAGAATGCATTGGTTGAGGAGGATCATCTGCAACTTGCTTGTTAGTGGAAAAGAAAATTATGAAAAGGGAATTTTATATATATTTTCTTTGTCAATT…
GmaAffx.28978.1.S1_at	BU547563	At5g16150	1e-56	Transporter			AAGCAGTTTCTTTGTCATTAGGCACACATTGGATCTCCAACTTNGTCATNGGCCTCTACTTCTTGAGNGTTGTAAACAAGTTTGGTATCAGCTCCGTGTACTTGGGNTTCTCNGCTGTCTGTGTTCTTGCTGTTTTGTACATAGCTGGTAATGTTGTNGAAACAAAGGGTCGATCATTGGAGGAAATAGAACGTGCTCTCAGTGCTTCANCATGAAAATNTTCNAGGAAATGCNTNTGTTCATAATTCCTATGCTGCTCANAGAACTGTTTTATGCTCTTACTANNNGTTCCACACATTTGTCTGGCACGAGTGATNACTGGGATAACTTGTTTATTGTAACCAAATTTTGCTCATGGGCAAATATGGGAACAATTTGGTGTGAGCTTTGGTCAAGCAT…
Gma.11183.1.S1_at	CD396098	At5g46110	1e-145	Transporter			AGTAGGTTTGGTCAAGTTCGTCTCAGATCTCTTCTGGGTTGGTATGTTTTACCATCTCTACAACCAGGTGGCTACCAACACACTGGAGAGAGTGGCTCCTCTCACTCATGCAGTTGGGAACGTACTGAAACGTGTATTTGTNATTGGATTNTCNATTATAGTCTTNGGTAACAAGATTAGCACCCAAACTGGTATNGGAACAGCCATTGCAATTGCTGGNGTGGCACTCTACTCGTTCATCAAAGCCAGNATGGAGGAAGANAAGCGACAAGCNAAAGCAGCATAAGANNNNAGTNGTCAACCTGGAGGATGTCTTGCACTGTA
Gma.5693.1.S1_at	BU083047	At4g39850	4e-89	Transporter			ACCTATATGGGCTAGCGAACAAAATGGGGATCACTGTTGTTACTTCCTCACAACGTCCTGCTTTAATACCATTTCATTCCATGGAATTGCGTCTGATTGATGGTGAGGGTAATTGGGAACTTCGTTCGATCAAGCAATGACTTTCGCACCTGCAGATTCTCATTGTTACTATTTGAGATGTTGCTGAGTCTTTGAACATACAGAATGATTGCAAGCAGATATTAGGCTTGCCATGATGGTCATTCCTTTATATTTTTTTTTCTTCTTTTTTCTTTTTTCATTTTGGGTTTACCATATTCTCCAAGCTTGCTCCGTCGNCNTGTGGGGACAAACAAACAAAAACAGCATCGATAGCCAAAATGATTGATAGTAAGTTGGAGTGCACAACCTTTTCATGAT…
GmaAffx.92422.1.S1_s_at	CF808147	At2g34250	1e-108	Transporter			TCTCGTTCCTACCTGAAGTTCAGACTGCTGATAGGAAAGTGCCATTTAGAGAGAAGGTCATATATACTGTGATCTCTCTGTTCATTTTCCTTGTTTGCAGTCAGCTTCCTCTGTATGGAATACACTCAACAACAGGTGCTGATCCATTCTATTGGATGCGTGTTATCCTTGCTTCAAACCGTGGAACTGTTATGGAGCTGGGAATCACCCCTATTGTGACATCTGGGCTGGTAATGCAACTTTTGGCTGGATCGAAGATCATTGAAGTGGACAACAATGTACGGGAGGATCGTGCACTCTTAAATGGTGCACAGAAGCTACTTGGCATCTTGATAGCTGTTGGTGAAGCAGTTGCATATGTTCTTTCTGGAATGTATGGTAGTGTTGGTCAACTTGGAG…
GmaAffx.93612.1.S1_s_at	CF806622	At2g34250	1e-114	Transporter			TTATTTTATACCTCCAACATGCCCATTATTCTTCAGTCTGCCCTTGTTTCCAATCTCTACTTCATTTCTCAGCTTCTACACAGAAAGTACAGTGGAAACTTCATTGTAGATCTATTGGGCAAATGGAAGGAGTCTGAATATGGAGGTGGTCAGTCTGTTCCTGTTGGTGGTATTGCATACTACATCACTGCACCTTCCAGCTTAGCTGATATGGCAGCCAATCCTTTCCATGCATTATTCTACCTTGTGTTTATGTTGTCAGCCTGTGCCTTGTTCTCTAAAACTTGGATTGAAGTCTCTGGTTCATCTGCTAGA
Gma.8556.1.S1_at	BU764573	At2g39890	2e-39	Transporter			GGCTACCTAGCCTTTAACACATTTGTGGCGGCTTTCCTGCCATTCCTTGGAGATTTCATGAGCCTCACAGGGGCGATCAGCACATTTCCCCTTACGTTTATTCTTGCAAACCACATGTACCTTAAGGCAAAGAAGGACAAACTAAACAGCTCACAAAAGCTCTGGCACCGGTTCAATATTGGTTTCTTTGCCATTATGTCTCTGGCAGCAACAATTTCAGCCATACGGCTCATTTCTGTAGACTCCAAAACATACCATGTTTTTGCTGATTTGTGATTAAATTCATTGTATTCTTTCAGCAATTGTAGCACCAGAGGCTTTAGTGTTTCAGATGCTTT
Gma.1382.1.S1_at	BQ612821	At1g04690	1e-166	Transporter			ATGAGCTTGGTGTGCCATTGTCTCAGCTTGCGATTGCGTGGTGTGCTGCTAATCCTAATGTTTCCTCGGTTATCTGTGGTGCTACAAAGGAGTCTCAGATTCAAGAGAACATGAAAGCAATCGATGTCATTCCATTACTGACTCCTGTTGTGATGGAGAAGATTGAAGCTGTTGTTCAAAGCAAGCCAAAGCGCCCTGAATCATACCGATGAATTGAAGTTTTTCCATGGTGGACACATATATGCATTAGATGGGAGGCTCCGTCATCCCCGTGCACTTGAGTGAAAATTCTTGTTGAAAATTATTGGTGTGGTTGATGTGATTTCTTGGGACTTCTTTTCTTTGTCATTTTTTCTTTCTGGCACTGATTATGCCTTCTCTTTTATG
GmaAffx.18686.1.S1_at	BU548864	At1g31120	1e-123	Transporter	Inorganic Solute Cotransporters	Putative potassium transporter family	GCAGCCACACCGAGGTCGATGAAGTTGAGTTCTTAAACAACTGCAGGGATGCTGGGGTGGTTCACATTCTANGAAACACAGTTGTCAGGGCAAGGAGGGATNCAAGATTCCACAAGAAAATAGCTGTTGATTATATATATNCATTTCTCAGGAAGATATGCAGGGAAAATAGTGTGATCTTCAATGTTCCTCATGAGAGTCTATTAAATGTTGGTCAGGTTTTCTATGTATAGCCTCTACTCCTCTTCTCTTGGTAATTCTTGCGTGAACATTGAGTTTATAGGCACATTCAATCAAAAGCATGTTAAAATAGTTAATAATAATAAAATATGTATTGAAATCTATATGTTAATATTGTTTTAATATTATTCAAAAGCTTTTGATTGATTGAGTTTATAA…
Gma.2707.1.S1_at	BQ740787	At5g26330	6e-23	Transporter			GACATCCTAGTTTTCAACTACCCATCAAATGCACACAACGTAGAGGAGGTGACAAAGGCCAACTACGATTCTTGCAGCTCAGCCTCTCCTATCGCCACTTTCACCACTCCACCGGCCAGAGTCCCCCTTAGCAAATCCGGTGAACATTACTACATCTGTGGAATTCCGGGGCACTGTTTGGGAGGACAAAAGCTTTCCATCAACGTCACCGGCGGCAGCACCGCCACCGCCCCCACCACTCCTTCTAGCCCTTCTCCATCAGGTGCTGTCAGTCCTCCCCCACAGAACTCTGCTGCTGCATCTCTCGGTCTTGTTGGAGTATCCGCCACCCTTCTTTCAGTTGCCGCGGCTTTTTTCTATTATTCTATTTATTAGGATTCTTCGCTCTTTGATTTATCT…
Gma.14471.4.S1_x_at	BQ081409	At2g37170	3e-54	Transporter			CAAAACTTGCTATAGCAGTAAGCTATAACTCATTTGAGGCTCTGTGAGAATTGAGAAATGGCTAAAGATGTTGAGGTTCAAGAGCAAGGAGGAGAGTACTCTGCCAAAGACTACCATGACCCTCCTCCAGCACCTTTGTTCGACCCAGAGGAGCTCACACAGTGGTCCTTCTATAGAGCCCTCATCGCTGAGTTCATAGCAACCCTTCTCTTCCTTTATGTCACTGTGCTCACCATTATTGGCTACAAAAGGCAGACTGATACAACGGTAGGTGGCACCGACTGTGATGGGGTTGGCATTTTGGGCATCGCTTGGGCCTTTGGTGGCATGATCTTCATCCTTGTTTACTGCACCGCCGGTATTTCAGGAGGACACATAAACCCGGCGGTGACATTCGGG…
Gma.6288.1.S1_at	AW348556	At4g00430	1e-139	Transporter			GTGTTCTTGGTGCACTTGGCCACAATCCCAATCACTGGAACTGGTATCAACCCTGCACGAAGTCTCGGTGCTGCCATCATCTTCAACAAAGACCTTGGCTGGGATGATCACTGGATCTTCTGGGTTGGACCTTTCGTTGGTGCAGCTCTTGCGGCTCTTTACCACCAAGTTGTAATCAGAGCCATTCCCTTCAAATCCAGTTAATTAATTGGATTACAACGATTCGTGGTCAATCAAGTTGGGTAA
Gma.7546.1.S1_at	BU083528	At1g71880	2e-22	Transporter			GGTGGTGGCAACTTGCCGGCTTTCATGGTGGGTGCNGCGGCNGCCGCNTTGAGCGCCATAATGGCGATTGTCTTGCTGCCAACTCCAAAGCCAGCTGATGAGGCCAAGGCTTCAAGCATGATGGCAGGGGGCTTTCACTAGTTAATNGAGTTTTGCATGTTTCAGTTTTGTCCCCTGCTTTAATAGNAANAAANNAAAAAAANANAGTAATAAAAGANGAAAANTTGGATAGTCTNTTNNNNNTTGANTTGAAGCTGGTGTGTAATTANGTAATAGACCCACCAAGTGCTACATTTNTAACCTTTTGTAGCACCCACTGAACATAGTAATT
Gma.13295.1.S1_at	CD412186	At5g53180	2e-58	Transporter			TTTTAGGGCAACATCCAGTTCCGATGACGGGCCCTCCTCCTCAACATTACAATGGAGCTCAGTACGCACCAGTTACTGAGCAAACTCTGATGTCTCATTCTCAGGCTGGATGGGGGACAGGTCCACCTCAGTCTATGCAACAGATGCATAACNATCCTTACACGCCATCCGCCATGGTGCCACCGCAAACAACCCCTGGAATGCAGTTTCCAAGTCACATTCAATAGCTTGCATCTCATGTCTCATACACCAAGTGGTGAACAAGGTCAGTGCCATCTGCAGAAGTGAGGACTACCATTTAAATTGTTGCTTCCTATGATGTGAGGAAACTGGCGTTTGCTGATGTGATTCCGAAACTCTCATTCTCCCTTGGTTTATTATTATTAGATGAGATGAGAT…
GmaAffx.24383.1.A1_at	BU546906	At1g69870	1e-40	Transporter			GGCTTGCCTAGAGGATTCGGTTGCAAAACTCGAATCGGGATCGGATTGTTGTTTGTATGCTCAGCTAAGGCGACGTCAGCTGTAGTTGAAACTATGAGGCGAAATGCGGCCATTGAACAAGGCTTTGAGGACCAACCTAATGCTGTAATTGACATGTCGGTTTTATGGCTGTTTNCTGAGTTTGTTTTGCTTGGAATAGGCGAGGCTTTTAACTCGGTTGCGCAGGTTGAGTTTTTCTACACTTGTATCCCCAAGACCATGTCTAGTTTTGCAATGGCTCTTTTCACTCTTGAACTAGCTGCTGCTAATGTAGTGGGGAGTGTGTTAGTGAGCATTGTGGACAAGGTCACTAGTGTAGGAGGGAACGAGAGCTGGATAGCAACTAACATTAACAGGGGA…
GmaAffx.77717.1.S1_at	BI788393	At3g54140	1e-111	Transporter			GGCCTCTTCATATCCATATTTTCCATGGTAGCTGCAGCAATATTGGAGCTCATACGGCTTAGAATGGTGAGGAGGCACAACTACTATCAACTTGAGGAGATACCAATGACAATATTTTGGCAGGTTCCTCAATATTTCATCATAGGCTGTGCAGAAGTCTTCTATTTCATTGGTCAGTTGGAGTTCTTCTATGAGCAAGCCCCTGATGCTATGCGAAGCTTTTGTTCTGCTCTCTCACTTACCACTGTTGCGCTTGGACAGTACTTGAGCTCTCTGCTTGTGACAATTGTGACAAAGATCAGCACTAGGAATGGAAGTCCAGGGTGGATACCTGATAATCTAAACTTTGGTCACATAGATTATTTCTTCTGGCTATTGGCATTGCTAAGTGTAGTGAAC…
Gma.11144.2.S1_a_at	CD401702	At1g19910	4e-22	Transporter			CGTGCTGGTCAGTCTAGAGCTGATTAAGAAAGA
GmaAffx.91894.1.S1_s_at	CF807619	At4g38510	4e-41	Transporter			GTATAATAGACAGATATACCCACCAATCAACGTCCTCCCATCACTATCTCGGTTGATGAAGAGTGCTATT
Gma.5527.1.S1_at	AI416580	At5g62600	1e-89	Transporter			AATGGACTTACTGTTCCTGTTGAAGAGCTGTCAGATGTTTGCCGACGTAACAGGGCCGTTCAGGAAATAGTTCAGGAAGCTTTGAGACCGCTTGAGTTGAATATGGTGAATGTATCATAGAGGATTGGTAAATGCCNNTGATAGAGAGGNCCATTTTGTTTAGGNTCCTGTCTGTTAGTTAGGCTAGTTGGTTGTGTATTATCTATCTGTTATATTCATTTTTTTTTATCCATTATCATTCTCCAATTTTTTAGAAGAATTTGCCCCTGCATGCTCTGATGTGTTGGCCGGAAG
Gma.11249.1.S1_a_at	AW348404	At3g50590	1e-157	Unclassified - Hypothetical Protein NOT Supported by cDNA			GAGCAGGACCAGTTCCTTCTCCGTTCGGTTGAGTCTCAAAGATGGGTCTTAATCCTTGC
Gma.10639.1.S1_x_at	BI470008	At2g41010	3e-27	Unclassified - Hypothetical Protein NOT Supported by cDNA			GGGTGCCTGCCGACGCTCGACACGTCGGCCTTCCTGCTGGACCATCACCAGCAGGTGGTGGGGCCCTCCTCTGTTAACTCTGGGCCTGCCACCGGGCTTTCTGGGCCCGGCCCGCTCCCCTTCGCCCAACCCCTCCTTGACGCTTCCTTCGCCTCCGCAGGGTTAGATTTTGACACCTTCTCCAGCTTCCCCACTCTCGAGTCGTGGAAAGTCATGTGATAAAGAAAGAAGAGAAAAAAAAAANTTGAGAATATGAGATGAGATAGATTCTCTGAAAATTTTCTTTTTNCTTTTTCCCTTTTTGCCCCTCTCGTGGGTTAATGAATCTAGCAGGGGAAGCTAGCTAGGATGATCTTATGTAAATTTGGGAAGGGAAAATGGATATGGAACTAGTATCTC…
GmaAffx.52494.1.S1_at	BE473800	At1g21230	4e-23	Unclassified - Hypothetical Protein NOT Supported by cDNA			AGAAGTCTCACTAACCACTTTTTGTCTTGCTTGAAAGAGGATCGCCTATCTGATGTTGTTCAAGATGGCATTATGAATGAAGAAAATAAAAAGGAGATCATGGAGGTTGCTATTCTTGCTGCAAAGTGCTTGAGACTCAATGGGGAGGAAAGGCCTAGCATGAAGGAAGTGGCTATGGAGTTGGAGCGAATGAGGCTAACCGAGAAGCATCCTTGGATAAATACATTCCAAAATCCAGAGGAGGCTCAGTTGCTTCAAAAGGGATCATCTAGCCTGTGTGTATCAGGTGATAGCGGCAGCCATCAATACACTGGGTATGACAGCATTAATGATCATGCACAAATTGCTTTCGATG
Gma.5477.1.S1_at	CD414466	At2g45540	6e-98	Unclassified - Hypothetical Protein NOT Supported by cDNA			TTCACTGACCCAGCTTTAAGCTTGAAAGTGGTCGATCAAATGCTCAAGCTTGGNTGGGAAGGTGATGGGCTTCAGCCTCTCATAAAATCATAGCTTTTANGGTATACATTAATGGGTTACAGATCTTCTANACANNATNAGTTAGGAAAATTAGGTNGAGGTTATGACANNNGNNNNNNNNNNNNNNNGTTGCGCCNCNATGGTTTAGANATATCTTGTGACATATGTAACATTCTATTGTTACCACTAGAGTTAGATTCCTTAGATTTAGCAGAGGGTTCTTTGCTCCTCCGGTTGTGCTATAGTGTTGATATTGGACTAGCTTCTGAGTTGCGACTGAGGTTTGAGCCATTTTTGTCNNACCATNTTTTTTATTANAGAGAATGAANATNTAATAGC…
GmaAffx.813.1.S1_s_at	AW781933	AtCg01130	5e-50	Unclassified - Hypothetical Protein NOT Supported by cDNA			AACGATGGAATCGTCCATTTCGATATATAAAAAATAATCGATTTGAAAATGTCGTAAAAAATGAAATTTCAGAATTTTTTTTNCATACATGTCAAAGTGATGGAAAAGAAAGAATATCTTTTATGTATCCACCAAATTTATCAACTTTTCATAAAATGATGGAAACCAAATTTTATCTCTTCACAAAAGATAAAATTTCCTATGATGAATTGTCTAATTATTGGAGCTATACTAATGAAGAAAAAAGAAACAAATTGAGCAATGAATTTGTAAATAGGGCAAAAGTAATGGATAAGGAATTAATTTCTCTGGATATATTAGAAAACCGAATTCGATTGTCTAATGATGAAACTAAAACAAAATATTTAACTAAAATATATGATCCTTTCCTGAACGGAC…
Gma.11341.2.S1_at	BQ081111	At4g17900	8e-59	Unclassified - Hypothetical Protein NOT Supported by cDNA			AAGCTACCGCTTCCAAGTCCTACAAGANNANCCCATTCCCTCCCTCATTGCCCCCACTCTTCTCCACTTCTCAATCCTCTGTAACTTCAAAACATACACCTCTTCTCTCTGTTTCTCTTCACTCTCTCTCTCCCTCCCTCTTCAACTAACATGGCAATTGA
Gma.11341.3.S1_s_at	BM177332	At4g17900	2e-53	Unclassified - Hypothetical Protein NOT Supported by cDNA			AGCCACTGCTGAAAGAGAGCTTCTTTGTTCAATGCAAGTTGCATGCTGACTCTCACAAGAGCGAATGCAACATGTATTGCTTGGACTGTATGAATGGCCCTCTCTGCTCTCTCTGCCTCGCTCACCACAAGGATCACCGTGCAATCCAGATTAGGAGGTCCTCATAC
GmaAffx.30088.1.S1_at	AW734985	At2g20280	1e-122	Unclassified - Hypothetical Protein NOT Supported by cDNA			CTGCCCCAATGGTGGTAAGAATTGCCATTATAGACATGCTCTTCCACCTGGTTATGTTTTGAAATCTCAAATGAAGGCTTTGTTAGAGGAAGAAAGTGAAAAAATATCAATTGAAGAGGAGATTGAAAANCAGCGTGCCAAAGTGGCAACTACAACTCCTATGACTCCTGAGTTATTCTTTGA
Gma.6969.2.S1_at	BI321314	At3g53970	4e-77	Unclassified - Hypothetical Protein NOT Supported by cDNA			GCTGGATTTGGTGAACCTGCTGATCCTCCAACTCAAATTATTTTCCCTTCAGTTCCCNNNGGNTCTGGTAGTGATCTTGTTCCNGGGCCTGCTGCTGGAGTGTTTCCTTCAAGGGGTGGTCATGGCATTGGTGGAAGCATGCTNGTAGGGCCTAATGACCCCCGTTGGTTNNNTGGTGNNNNNNGTATTGGTGGAGATCCTGCTTTTCCTGGAGGATTGCCGGGTGTTCCTCCCGGTGCNCGATTTGATCCNTATGGACCTCCCGGTGTTCCTGGTTTTGAACCCAACAGATTTGCAAGGAATCCTAGGAGGCCAGGATATGACACTCATCCAGATTGGCAACATTTTCGGAGAGATGCTGATTCAGACTACATATAGTCGTAATACGGACAAGTTGTC…
GmaAffx.52739.1.A1_at	BU090805	At1g44750	2e-48	Unclassified - Hypothetical Protein NOT Supported by cDNA			AATTAGGCTTCAACGCGGTGTTCTCTTTCTTCCTCAATTCCCAGAAATTCACAGCATTCATAATCAATTCTGTAGTCCTCCTTACCATATCAGCTTCTCTGCTTGCAATCAACTCCGATTCCGACGAGGACTCAACCGGTCTTTCCAGAGAAAAGCATGTAATTGGATTCTTCTGCACCATTGGTGCATCAGCTACATTCTCTTTGTACCTCTCTCTTGTGCAGCTTTNTTTTNAGAAAGTTATAAAGAGAGAAACCTTTTCTGCTGTGTTGGACATGCAATTTTACCCATCCTTCATTGCTACATGTGCTTGT
Gma.12651.1.S1_at	BQ628085	At4g20130	1e-123	Unclassified - Hypothetical Protein NOT Supported by cDNA			AGATATGGATTTTCATCACCCGTGAATCCTTGGGACAAGATCAAATTCTCAGGCAATGCGCGTATTCATTTGGATTCCTTCTTGTCAATCTTCAATATATCTGGCCTTCCTGAAGAGTATTACCATAATAATTGTCTGTCAAAAGCCGGAGATAGTTTTGTTGATGGAGCAGTCATAGCTGCAGCACGAACATTGCCAACTTGGTCAGATGGGGATGTGCCTCCAATCCCTAGCATGGAAAGAAAGGCTGCGAAGGAGTTGCAAGATGAATGTCAAAAGATGCTTGCAGAATTTGCTACAACCTCTAAGCAAGACCAGAAATTGCTAGATTCAATGGCAGATGCTACGAGGACACTTGAAGCTGCAATAAAGTATAGATTGCACAGGAAATTGTTCATG…
GmaAffx.49229.2.S1_at	BE609485	At2g29050	1e-39	Unclassified - Hypothetical Protein NOT Supported by cDNA			AGTCATTGGAATTCGGCTTGAGCAAGAATTTGGGTTTGTGCTAATTGGACTGCTATTTGTCATATCTGGATTTGGGGGGAGTTTGCTTTCTGCTCTGTTTATCCAGTCAAACATTTCTGTTGGTGCTTCTGGTGCACTTTTTGGCTTGCTGGGAGGCATGCTTTCAGAACTCATTACTAACTGGTCTATATATGATAACAAGCTAACAGCACTCCTCACCCTTGTGATCATCATTGTTATCAATCTAGCAGTTGGAATTCTCCCACATGTGGACAATTTTGCTCATATTGGAGGCTTTCTTACTGGATTTCTTCTCGGATTTGTGTTTTTGATACGTCCCCAGTTTGGATGGGTTAACCAACGATATGCTCCCCTAAATTATTCTCCAGGA
Gma.6346.1.S1_at	BQ613019	At1g43850	2e-08	Unclassified - Hypothetical Protein NOT Supported by cDNA			TGGTAATTATGGCACAATGGGTCTTGGTCAATCCGCTATGCCTAATGGAATCAGAACTGCTATGGTAAATAATTCAATCATGAATGGAAGGGGAGGAATGGCGTCTCTTGCCCGGGATCAAGCTATGAATCATCAACANGATNTGTCAAACCAACTACTTAGTGGNCTAGGGGNNGTTGGTGGTTTTANTAATCTTCAATTTGATTGGAAACCTTCTCCTTGAGAGCCNTTTGTAGATNNTATGAATGTTGTGGTTCTTGACAGTTGCTCATGCAACATGAGCAATGGTATTTGCCTTCGGCCCCTGATGATGGCAGAAAGTATTTGGGTTGGGTAGAGTCATAGGGCGTTGGCCACTGTGCTAATATATGATTTT
Gma.5309.1.S1_at	BM092263	At5g20700	5e-27	Unclassified - Hypothetical Protein NOT Supported by cDNA			GAATCCCACCAACGCAAACTTTAATTGAAGAAGATGAACAGTCATATCCCACCTCGGATTTTCTCAGCTCGTGTCACTTGTGCCGAAAGAATCTCGATGGCAAAGACATATACATGTACAGAGGAGAGAAAGCATTTTGTAGCAACGAGTGCCGTTCAAGGCAAATATCGATGGACGATGAACGCAAAGAACGGTGTAGATCAGAAGCTTCAAGGTCTGTGGAGTTGTCAAGTTCACCATACACAGCAAGGGATCAAATGTTTTCAACTGGGATTGTTGCCCTTTAGCGTTTAATTTCTGTCACTGTAGTA
Gma.5377.1.S1_at	CD401646	At2g07340	6e-44	Unclassified - Hypothetical Protein NOT Supported by cDNA			AACAGGTGCAAACCCAGATGCGTTCCAAAGAAGCAGAAAANAAGCGTGCTTTTCTGACCATGGAGGAGCTGAAGCAAGTTCCTGATGATACNAATGTTTACAAATCCATTGGNNNNNNNTTTGTATTGGAGACCAAGGCAACATTAATGAATGANCAGGAGANCAAGTTTAAGGATGGTGAAGCTTCAATTACTGCATTACAGAGCTCAAAAGAATACTTGGAAAAACAGATGGCAGAGGTGGAAACCAATTTGAGAGAACTGCTACAACAAGATCCTGGTCTTGCTAGGCAAATCATGTCTATGAATGTAGTGTAAACTTTCCNTTAGTGAAATTAACTTNNANTGGNNGGGTTTTCTGGTGCATTTGAGCAAANTAGAAAATTCAGGACTTGGTGAG…
Gma.9134.1.S1_at	CA801591	At1g49180	2e-41	Unclassified - Hypothetical Protein NOT Supported by cDNA			ATGCTGAGACAGTTTGCGGTTCTCCATTATATATGGCTCCAGAAGTTCTTCAGTTCCAGAGATATGATGACAAGGCAGACATGTGGAGTGTTGGGGCCATTCTTTTTGAGCTTCTAAATGGCTACCCACCTTTTAATGGCAGAAATAATGTTCAGGTGTTGAGAAACATCAGATCCTGCACCTGTCTTCCATTTTCTCAACTGATTCTTTCAGGATTGGATCCTGACTGTCTTGATATTTGTTCAAGGCTACTACGCTTAAATCCAGTGGAGCGCCTCTCCTTTGATGAATTTTATTGGCATAGCTTTCTACAAAGAAAACTGATGGGAACATGATAACTATACCAGGATTTGAAGTGTTCACGATCTTTCCATGGTAGTTATCTTCAAAACTATCAAA…
Gma.2580.1.S1_at	CD412837	At3g24570	2e-54	Unclassified - Hypothetical Protein NOT Supported by cDNA			ACTCATGCTTAAACCGAATTCCTTCCGCTTTGTTGCCACTAAAGTTGCCGTTGATGGGTTTATCTTTGGACCATTGGATTTACTTGTGTTTTTCNCTTATATGGGTTTTTCTGCTGGAAAGAGTGTTCCTCAAGTAAAAGAAGATGTGAAGAGAGATTTTCTCCCAGCCTTTGTTTTAGAAGGGGGCATATGGCCAATTGTTCAGGTTGCGAACTTTCGGTTTATACCTGTGAGGTATCAACTCCTTTATGTCAACTTCTTCTGCTTGTTGGATAGCTGTTTCTTGTCTTGGGTTGAGCAACAACAGGATGCTCCATGGAAACAATGGTTGAAATCATTTCTACCTATGAAGTAATAGAGCTTTGAAAATAGCTCAATTTATTTGCGGAGTTGCCAGTT…
Gma.929.1.S1_at	CD412359	At4g14310	1e-64	Unclassified - Hypothetical Protein NOT Supported by cDNA			ACTGTTGCTAAGAAGGTGATCCTTGAACAGATAACCAGTTCCCCATGGAACAACTTTTTGTTCATGATGTACTATGGCTTGGTTATAGAAGGAAGACCTTGGAGTACAGTCATAAACAAAGTTAAAAAGGATTACCCTTCTGTTCANTTGACTGCATGGAAGTTTTGGCCTATAGTTGGTTGGGTGAATTACCAGTATATGCCTCTGCAGCTCCGTGTTGTATTTCACAGCTCTGTTGCTGCTTGCTGGGCAATCTTTCTGAATCTGAAAGCAAGGTCTGTTGCAATTAAGGCTNCCTAGGACATCANAAATTTCANACTTTTGGGTAATTTTCTGTTTCCTTCCTATGTA
GmaAffx.15904.1.S1_at	AW348412	At5g01300	2e-47	Unclassified - Hypothetical Protein NOT Supported by cDNA			AAGAGTTTAGGCTAGTGTCACCGGCGTTCAGCAACGAGGGGAAGTTACCTCGGAACTACACTGACGAGGGCCAGGGTGCGAAAAAGAACATATCCCCTCCGTTGGAGTGGTACAACCTGCCGGAGGGGACCAAGACCCTCGCCCTCGTCGTGGAGGATATCGATGGATCCGATTCNGNTGGGCCCATNNTGCCATGGACCCACTGGGTCGTCGCAAACATCNNGGCCACGGTGAAGGGCNTGCCGGAGGGATTNTCCGGCAAGNCNGCCGAGATGGGNGGNGANTACGCGNCGATCAAGGAGGGGAACAATGACCTGAAGNNGNCNGGNTGGAATGGGCCCAGGCTGCCCACGCCTGGNCACAGGATTCAGTTTAGGCTCTATGCTTTGGATGATGAGC…
GmaAffx.58497.1.S1_at	BE609379	At3g14270	5e-87	Unclassified - Hypothetical Protein NOT Supported by cDNA			AAGGCTGCTTCTACCAATTGGTGTCAATGACACTGTAATTCCAGTATATGATGATGAACCCTCAAGTATTATAGCTTATGCCTTAATGTCACCAGAATATCATTTCCAATTAAATGATGAAGGAGAAAGGCCAAGAGAAGGAAATGAGTTCACTTCATCATATTTTTCTGACTCAGGCACCTTGCAGTCATTCTCATCTGTTGANGAAACAGCTTTTGATTCTCANAAAAGTTTTGGATCGATAGAGGAAATGATATTTTCCATGTCTGGGTCTCGTAATTCATCAATATTGGACCCAATGTTATATACTAAGGCTATGCATGCTAGAGTTTCCTTTGGAGTAGATGGTCCCCTTGGCAAGGTAAAATATTCTGTGACTTGTTACTACGCCAAGCGATT…
Gma.8819.1.S1_at	BE820500	At3g20790	1e-133	Unclassified - Hypothetical Protein NOT Supported by cDNA			GTTTGTAATGGTTGTCTCCTCCAGATCCCCCAAGACCTTGTGGCGAGTTGTTGGCTTGAATGGAACCCTGCAAGTTGAGCGTGGATTCCAAGGACAACATGGTTACCTGGTTTCATTTTATGGTACCGATGGACAAAACAAAAGCTCTTTTTTCCCATTCAGTGGAGTAACTGAAGAATTAAAAGCTTTTATTAATGATGTATCTGAAATCACCCTCAAGAAGCGGAATCAGTTTGTGACTGAGCCTCGCCTCTCTTATGTCGAAGGTGCAAGAGATGTTGCTGTGTTAGAGGCAATGCTTGAATCTGGAGCTAGGCAAGGTGAGTTAGTTCGTCTGAAAAAGTTTTGAGGCAATAATGGAATTGGTCACCTAGTTCAATGTCTGCGGATATTTACTCT…
GmaAffx.88992.1.S1_at	CK606304	AtMg00030	2e-28	Unclassified - Hypothetical Protein NOT Supported by cDNA			AACGGCGTACCTTTTGCATGATGGGTCAGCGAGAAAATGG
Gma.4336.1.S1_at	BQ079907	At4g28460	0.002	Unclassified - Hypothetical Protein NOT Supported by cDNA			AGGCATGCACCCTTTTGAATTTGGTAGCGGTTGTTATGTTCGTTGCCATTTTGATTAGCCAAAGTAGGGTGGAGGCTAGGGTTTTATCTCATTCGGAGGAATTTGCATTTGCAAGAGCTAATAATCTCCAAACATACACCTCATCAGCCTATGAGCAAGCCAAGAAAACCATGGGTTTTTGGATGCAGCGTTTGGCTTCTGGACCAAGTCCTAAAGGCCCTGGTCATTGATACCTCACCCTAATACACCACATCCATGTTCACATGTAGCTAGAATAGCTCAATTATTTTATCACTTTCGTCAATTTATTAAAAGTTTCTTTATTCAATATGATCTATCGGTGAACACACACCTATCTATCCACAT
Gma.739.1.S1_at	BG882670	At5g27490	3e-91	Unclassified - Hypothetical Protein NOT Supported by cDNA			AGCAGCTTCAGGGATCTGTTCCTGCCGTTCCAGATTCACGACCCGCCACCGTCAATTTCGCAGATTCAAATCTTCAGACNTTTCCTCCNTCTGGNNCTCNGGGCAAGATNACNGCTGCTTCCGGGCCTCCTCGTGACGCTGATGATTCATTTTCAAAACCTGTATCTGGTTCTGATGAACCNCAGCAGGGTGGTTGGTTTCAGACTTTTACAATTGCTGCTTACAAACCATACTTTGATGTTGACACTTCAGATGTTCTNGAGAGGATTATCGACTCACTATTTCCATTTAGAGGATCTTTCAATGAAAAAACTGCTACCAACCCTGATTTGTAT
GmaAffx.66595.1.A1_at	BU549225	At3g27960	6e-56	Unclassified - Hypothetical Protein NOT Supported by cDNA			GGTATTGCTCTTAATCAAATGGGACNCGCCTGTGTGCAGTGTTATGCCTTAAGTGAGGCTACAGAATTATTTGAAGAAGCAAAGAGTNTTTTGGAACANGAATATGGACCGTATCACCCAGAAACACTTGGGGTCTCTAGTAATCTTGCTGCCACATATGATGCAATTGGCAGGCTGGACGATGCAATACAAATTCTGGAGTACGTTGTTAACACGAGGGAGGAAAAACTCGGGACCGCAAATCCTGAGGTGGATGATGAGAAGAGAAGGCTGGGTGAGTTGTTGAAGGAAGCAGGTAGAGTTCGGAGCAGAAAAACCAGGTCACTTGAGAACCTTCTTGATGGCAATGCTCACGCTGCAAACAACGTTGTCATCAGGGCATGATGAGGATGTCTGTCT…
Gma.10860.3.A1_at	BE210775	At4g19860	1e-10	Unclassified - Hypothetical Protein NOT Supported by cDNA			AATCACATTCTGTTGAAGTATTCGTAACGTGGAGGGAATACTTTCTGTCTTTGGAAAAAGCTAGGGTTCATGGTAACCCACCTTTTTTCCAATCCAGCTGTATAGTTACTTTAACGTTTGCCAATTTGGAACACGTGAATGGATGTCTGGAGCCGTAAAGGGCAAACCAAACACTCACTATATTGTTGATTATGGTTGACATCTCTTGTATATAATGATATTCGTTTGATGTTGCNGTGCCANANNNNNNNNNATTTGTGTATGATATGCGAAGCGTATGTATCAGTTATGAAAATGAATACCATCGTTCTGGCATTCTTGTA
Gma.8745.1.S1_at	BU763194	At2g04100	9e-38	Unclassified - Hypothetical Protein NOT Supported by cDNA			GCTTATGTGAACCTGGGAGCCTATTATCTTGTGGGAATTCCAATGGGTTTGTTATTGGGTTTTCATCTGCAACTAAGAGCCAAGGGCCTTTGGATGGGAACTCTATCAGGCTCTCTTACACAAGTCATTATTCTTGCTATTGTAACAGCACTAATAGATTGGCAAAAAGAGGCAACTAAAGCCAGGGAGAGAGTAGTTGAGAACTCAATTAAAGCTCACATTTGATGTATTCCTATCAAGTTTAAGAAAACTGAAAAATAAATGNCTGCAAGTGCTCACAATCGAAGTCTTTTTGGTTTCTGCATTGACTGTGATCAGCAGTGGAGTGGAAAGATAGTGAGTGTGTGTCAGGTTTCATTAATTATGTTTTTGGTTCATTTTTTGTGTGTTTGTGAAGAG…
GmaAffx.3852.1.A1_at	BU547704	At2g17030	6e-21	Unclassified - Hypothetical Protein NOT Supported by cDNA			GGATGATGGTAAGATCTCGCCCTTGTCGGAGTGTGCCGGGTTTTCGGAGTTGTTCTGCCCGCCGCCGGATTGGGTCGGGTTGCAGTGACACATCACACATGGATCCATAATAAAACCCGACTTTTATGAAGACTATGTCTCCAGTAACCTAACCTGGGTAAAGCAACATGCATGCATGAGTACTCCTCCAGTGTAAATTGAATAAAGGCTAAGATGCTTGGAAGTGGTCGACTTACATTTTGTTGAGGTTAATAAGTGGCTTCTATTGCATATTCATTGA
Gma.10495.1.A1_at	BG511781	At2g26850	2e-18	Unclassified - Hypothetical Protein NOT Supported by cDNA			TCACGATGGAGGCTGACCACTGTCAGTANNNAANNNCATAGGGAGGANNNGAACGANGCTGATGGATTTTATGGCGGAATAAGAAAGATTACCAGCGAGGCTGAGATTGCCACTTGGAAATGCCTTTGGCCANNTGAAGTCTTGGATTAGTAGGCACTAGCACTGGATCTGATCAAATTCTCTACAACTTAGCATGATTTCAATATAGAAGCTTTGTTTCAGAAACTGAAGCATTGACTGGTTCTGGATTATACATGGCAATATACAACCTGAAGTGGACTTCAGTTCAGATATTTAGGCCAACCCGATTTTCTTCTCTTTTTTGTCACATTTTTTCATGAAAAAATTTATGCATATTCATGTGGTTTCCCTCATTGTAAATTGNNNNTTTAAGCACAA…
Gma.17219.1.A1_at	AW310286	At2g46760	2e-49	Unclassified - Hypothetical Protein NOT Supported by cDNA			GAAACTTAGCATTTTTAGGAGCAATCAAGAAGTATCACAATGCAGACAAATTTTTGAAGGTTAAAGAGGAGTATGATCCACAAGGTCTTTTCTCTAGCCTGTGGACAGACCAAATGCTTGGACTTAAAGAAGGGGTGACAACATTCAAGGATGGGTGTGCGTTGGAAGGAATGTGTATTTGCTCACAAGATAGTCACTGTGCACCAAAGAAGGGATACTTTTGCAGACCAGGGAGAATTTATACGGAAGCAAGGGTTTGTACTCGTGATGTTAAGAAATCCAAAGAAGCAGATGATGTCAAGGACGAACTATGAAAGACCAGGGATAATTGTACTNTTTTTATAGTACTTTTTGCTTCTTTAGAAATAAAAGAATCTTATTTTTCCTTTAGAAATAAAA…
Gma.7531.1.S1_at	BI784696	At5g59050	3e-08	Unclassified - Hypothetical Protein NOT Supported by cDNA			CCGCAGGAATGGACGTACTGACTCCTTCGATAATAGTTCGTTCAAACAAGATTCAATTAAACCTTGGTGGAGAAAGAAAGCTAGTGAAATTAGTAGGATTGTGATAGGGAAGTTGGTTTTTTTTATAATATAAAGATGANATTCAAGAATGTGTTTGGGTAGTTTAGTGGCAATAAATCATCCGGTTTTTGTGAGAGATGCAGCTTTTGGGATCTGTTAGTTGAAGAAACAGTGAAAGATAGTAGTTTAGGGGAAGCTTTTTNTTTTTTTTTTTACTTTTATGAAGAATATATTTATAATTTGTAATAAGTGGGGTTCGTTTTCTTCCATGCTAATGTTAAATTAATGTTGATGGAAGAAGGGTAAAGAAGGGCTTATTGTGTTGGAAGAGGGTTCAGA…
GmaAffx.69671.1.S1_at	BE347898	At5g25360	3e-39	Unclassified - Hypothetical Protein NOT Supported by cDNA			GATTACTGCTTGGATCACTGACCTTTTCACTTGTATGGGTGGTTGTTTTGGATGCTGTATGAAACCCACACCAATTATTGCTGTGGATGAACCTGCAAAGGGACTAAGAATTCAGGGGCAGACAGTAAGAAAACCACACATATCAGATGGTTTCTGGNGTTNNNGCACTTGTGATCTGGATAACAGCAACATTCAATCTCAGAGAAGTATCTCGTCTGTCAGTACATTAAATCAAATTCTCTATCATAGCGGTGGAACTTCTACCCCAGGCGCCAATCCTGAATTTGTAAACCCAGGTCTTCTTCTTTGGAATGAGAGCAGGCTTCAGTGGGTTGGAAGTGGCAAATCTAGGAAGCATAGCCAACAAAAAAGAGAACCCAGACTAAATTGGAATGCAAC…
Gma.11990.1.A1_at	CD403519	At4g35920	8e-31	Unclassified - Hypothetical Protein NOT Supported by cDNA			GTCTTGTTGTTGCTATACTTGCTGCGTAAGGAGGAAGCTTCGGAAGATGTTGAACATCACAGGGGGATTTATTGATGATTTCCTCTCTCATTTGATGTGTTGCTGCTGTGCCCTTGTGCANGANNNGANANNNNTGNNGNNNNNNNNNNTTNNNGGTTNTNNNAAGACCNAAACAAGCCCTCCACCCTCTCAGTACATGGAATCTTAACTAACAAATGAGATTATCATTTGGTTGTTCGGGATTCAAGGTTCCTTGAAGACCTTATTAAAATAGAGGCTATTTGGCTATATTAGAATTCTCACAGGAAGGCAGGAATTATGTATTTTTATTCTCACCGCACCTGGCCTCGTTTTAACTATGTATAGTAATTTTATTTTGTTGTACTCGAAAAAAATTGC…
Gma.4222.1.S1_at	BU083971	At5g06570	1e-47	Unclassified - Hypothetical Protein NOT Supported by cDNA			AAGGGCTGAAACTGCCTCCGGTGCTGCTATGCGTGGCGGAGATGGACTTGGTGAGGGACACGGAGATGGAGTACTATGAGGCCATGAAGAAGGCCAACAAGGATGTGGAACTTTATGTTAGCAAAGGGATGACACATAGTTTTTATCTGAATAAGATTGCTGTGGATATGGACCCCAATGTTAGTGCTCAAACCGATGCTCTCATTTCTAGGATCAAGGAGTTCATTGAGAAGCACTGAATGGATCGGTTATCCGGAGTTGCTATAGTATTCAGAGAAGCTTAATTAAGGGTTTTGATATATATAGTTTATTTGTTGCACTAATAATTAATCGAGTTTGTTTCAGCTTAAATAATAATTTTGAGTTCGAGTTTTGGTAAGTGGTTTATCATTCCTAGTC…
Gma.13522.1.S1_at	AW101034	At5g11040	1e-45	Unclassified - Hypothetical Protein NOT Supported by cDNA			TGGAAGTTCTGGTTCGCAATAACACCAAGGATATGATCAAAATGAGTCTTAATATTACATGCAGAGATGTAGCTGGGGAAAATTGTGTAGATGNTACCAAAGCAACTGTTCTATGGACTGGTGTTCTGAGTGATATTACTATGGAAATTCCCCCACTTCAACAAATTAAACACTCTTTCTGCCTACATTTTCTTGTCCCCGGAGAGTATACATTACTTGCTGCAGCAGTGATTGATGATGCAAATGACATTCTTCGAGCTCGTGCAAAGACCACTTCAGCTGCTGAGCCAATTTTCTGTCGTGGACCACCATATCATGTTCGTGTTCTTGGGACTGCCTGAAGTTATGGTCCTTAAATCTGATGTGAAACTTGTAAAGTTTTGCGGATTTCACAATTTA…
Gma.7762.1.A1_at	BE821610	At5g13390	2e-56	Unclassified - Hypothetical Protein NOT Supported by cDNA			TGGTGAAGAATTTGGCCCTCCTCATTCTTACCTTCCCCAGTCATATACTTTTCAACAGGTACGTGTGGAGCCATACCAAGCAGAGTGACTCACCCCCGTGGATAACTTTGCCTCTTAATCTGCTTCCTATTGCATGTACAGATGTACTCAAGATTAAGATCTTGGGTATATTGGGAGTTATATATTCCCTGGCCCAATATCTAATTACTAGGCAACAATATATCTCTGGTCTAAAGTACATCTAAAAGATCATATATACTGTACGATATGTTTGTCAATTTAGGTATTCATGCACGTGCTTGTCTTGCCTAAATTTGT
GmaAffx.93341.1.S1_at	CF809066	At2g40730	1e-93	Unclassified - Hypothetical Protein NOT Supported by cDNA			GTAATGAAGCTTCCTCTGGGCAAATGCTGCAATATGCTTGGCTTGTTGGATCACAATACAAACCAATGGAACTGGCAAAATCTGACTGGGCTGCAATTAAGAAGTCTCCTCCATGGGCCATTGATTCTTGGGGCATGGGTTCTCTAATCTATGAGCTATTCTCTGGTATGAAGTTGGGCAAAACAGAGGAGTTACGCAACACTGTCTCCATTCCCAAGTCTCTGCTTCCAGATTACCAGCGGCTACTGAGTTCTGTGCCCTCTCGTAGATTAAATACATCAAAGCTTATAGAAAACAGTGAGTATTTTCAAAATAAGTTGGTAGACACAATACATTTCATGGAAATTCTTAGTTTGAAAGATAGTGTTGAGAAAGACACCTTCTTCCGCAAGCTTCCAA…
Gma.16425.2.S1_s_at	AW099501	At5g03380	0.0004	Unclassified - Hypothetical Protein NOT Supported by cDNA			CCAATGCTTGTTCCATCATGTGATAATCAGTGATTAATTTTCGTTTTCGGTGTACTCTTACACACGGACGGAATACGGGATACGGAATATGCACGCACGTTGTAATTTGTAAATAAAAAAACTGGAAAAAAAAATCGACCTGCGTGTAAAAAATGA
Gma.7233.1.S1_at	BQ453257	At4g18030	0	Unclassified - Hypothetical Protein NOT Supported by cDNA			ACTGGTGGATCATGAGGATGGCCCTCTTGTGCCTGAGAAGATATTGGTTGCTNTCAAAGTGTATTGGGTTGGCACCAGCAAAAACAAAACATCCANTGAGGAATAAAACCACTNTTNTTCNGGTGTNANATCTTNTACTTCAGCCNGCAGTAACATCCAAGGTTTCTAAATCCAACCCAAAGAAGGAATGGNNGGAAAAANNNTATGAATAATGAGAAGAGAAAAAAGATTGTAGAGCAAAGNAAAAGCAAAGATTGGTATGGTNANTTCGAGTTTATTCTACGTCTGCCTTACACCAAGTGTAGAANTNTAGATAAAATAGGTTCNNAGTAGTCTTAAATTAATTTTGGAGGATATGGACCAGCAAGTTTAGCTNNCTNAATAATTTAAGCCCNAGNT…
GmaAffx.92786.1.S1_s_at	CF807256	At4g18030	1e-106	Unclassified - Hypothetical Protein NOT Supported by cDNA			GATTGGCACTACTAGATATCGGAATGTGATGGACATGAATGCAGGCCTTGGAGGATTTGCAGCTGCACTTGAATCACAAAAGTCTTGGGTGATGAATGTTGTGCCGTCAATTGCTGAGAACACTTTGGGTGTTGTCTATGAGAGAGGTCTGATCGGCATTTATCATGACTGGTGTGAAGGCTTTTCCACATACCCAAGGACATATGATCTTATTCATGCTAATGGTTTATTCAGCATATACCAGGACAAGTGCAACCTAGAAGACATCCTTCTAGAGATGGATCGCATCCTAAGGCCTGAAGGAGCAATCATCAT
Gma.1939.1.S1_at	AW100789	At1g31850	1e-153	Unclassified - Hypothetical Protein NOT Supported by cDNA			ACTCTTCACTGCTGAAAGCCACAGATGTGAAATGAAGTATGTGTTGCTGGAAATGGATCGAATTTTAAGGCCTGGTGGGCATGCTATCATTCGAGAGTCCACTTATTTTGTGGATNNCATTGCTACTATTGCCAAGGGTATGAGATGGGTGTGTCGCAAAGAAAACACCGAGTATGGAGTTGACAAAGAGAAGATTCTGATATGCCAAAAAAAGCTATGGCACTCATCCAACAACGGTTCAAGATGACAAACTCTGGAACCTGTGCAGTGGTGAGAGGGGGTGGCTACAATTGTAAATCCAGAAGCAGAAGCAAAGGGAAATGGATTCAGAGCCACCATCAACTAAACATTGATTCATTCTATAATATAGAAGCCAAGAATCGGTCGAGTTC
Gma.2036.1.S1_at	AW457958	At1g69750	1e-22	Unclassified - Hypothetical Protein NOT Supported by cDNA			AAGTAACTGCTTTCTGAGATTCTGCAACCGCATGAAACCCTAGAAATGAGTGCCGNAGGTGGTGCATTTGGTGGCAATAGNGGGCTCCGTCCAGTGCCTCCCGAAAAGGGNATNTTNCCATTNGANCACATGCATTTGTGTGACCTNGAGAANATAGAATATCTCAATTGTCTAAAGACTGCTGGGCACCAGTCTGANAAATGCAGGCNATTCTCAAAAAAATACCTGCAGTGTCGCATGGAGAAGAACTTGATGGCAAAGCAAGACCTNGGTGAACTTGGTTTTAAGGAAAGTAATGTAGAAACTCCTGGAGGGAACATTACTGACAGGGTTGATAATCAAGANCAATGAACCCCAAGANTTAAGAATGCATATTGATTTTGAGGTTGAGTTTTGGTG…
Gma.8096.1.S1_s_at	BQ079403	At2g20190	3e-30	Unclassified - Hypothetical Protein NOT Supported by cDNA			TTTTCGAAGCTTTTGGTAACCAGAGTGCAGATGTTCGGAAGACCGTTGTTTTCTGTCTCGTGGATATTTATATCATGCTTGGGAGAGCATTCTTGCCATATTTGCAAGGGCTTAACAGCACACAGTTGAAGTTGGTCACCATTTATGCAAATCGAATCTCACAAGCCAGGACAGGCAAAGCGATTGATGCCGTTCAAGACTAGCAGGTTTATTGGGAAGAAAAAAGTTGTGGCTTTTTGGGTGTTGTCTATTCATTGTTGTGTATTTGTATATCTGCGTGCATGAATTTAGATGTGGGTTCCATTGTCTTTCCTTCTCCTTGGGTCTCTTTAAATATATA
GmaAffx.80511.1.S1_at	AW755736	At1g13750	1e-43	Unclassified - Hypothetical Protein NOT Supported by cDNA			TAAATGCATGCACTTCTCCCAACAGGGATTCGAACCTTGGTTTACCATATCATAGTAGACTAACCCCTTTTGCTAAACTCAACCATACCTGGCTGTTTTTCATGCTATGATGATGAGTGGGATGGGGAACTCAAGAGTGTTAATTTTCTCTTTGCTTGTTCTTGCAACCTTTCAGCAAGTGGTGTCCGATGAGCACCAACCCCTCTCAAAAGTTGCCATTCATAAAACAACACTTGCTCTTGATGAACGTGCTTATATCAAAGCCACTCCTAGTGTCCTTGGCTTGAAGGGACAAAATACAGAATGGGTTACACTGCAATATAGTAATCCAAAACCCACAATAGATGATTGGATTGGAGTGTTTTCTCCTGCAAACTTCAATGCTTCTACCTGCCCTGC…
Gma.10413.1.S1_at	CD396410	At1g48090	2e-65	Unclassified - Hypothetical Protein NOT Supported by cDNA			AACAGATGCCTGGATCAGTCCCTCTCTCCTCAACTTTTGGAAGCAGTGCCCGTGACTAGGACTATACATTGTTCATCACATTCAACATAGTCAAGTCCCTATCTAAACAGCCCTGTGCTCTATTGAAATTCTACCGATTAGTCCACCTGATGACTTCCGTTCAACCCATGCAGACAGTCACATGAGCCCACTCATATCAGGACTCAGATTGTAATGCTGGTTTCAGGAATGCAACCATATACCTACCCGAAGATAACGGTTACAGTTAGTTGGAGGGAATTGGTTCGAAATCTATCTATTGCTATGAGTCTCGGAGAAGGCCCATATCTCCAATTTTTTCTTAGAATATCATATAAATCCAATACTTCTTGTATAATATTGAGTGAAATAGTTTTCTTT…
Gma.5330.2.S1_at	BM092298	At1g62280	2e-25	Unclassified - Hypothetical Protein NOT Supported by cDNA			GGAAATCCATCACAGGTGCTTTTGTCACCCCATCAAAGATGCTCCTCTTTCTGTCTTTATTCCTTTTTATGTCTCANGCTNNCAGGCCANCCATGTTCAAGAAATCCATGAAGAGGTTAAACGTTACATGGTGGGCGTATNNATTCCCTNTAACCTTCCTTGGACTAGCTTGTGCTGAATATGCTCAAGAGGTGAAAAGTGNCNNNGCNTCNNGGTTAATGCTGGTTATATGTATGGTCTCCGTGCTGGTTTTTATTGCTTTGATGATCATCACTGTACTCAAAATTGAGAGACTGTTCCATAAA
Gma.1935.1.S1_at	BI970041	At5g50380	1e-45	Unclassified - Hypothetical Protein NOT Supported by cDNA			AATTTACAGGGTTCAGACAGCTTGGAAGGTACCGGATGANCAGCTTCGGGAGGAGCTGCGGATATCTATATNAGANAAGGTGATTCCTGCATACCGCTCGTTTGTGGGAAGGTTTAGGATTCAGTTAGAGGGAAGGCATGTGGGGAAGTACATTAAGTATACACCAGAGGATCTAGAGACCTATCTATTAGATTTATTTGAAGGATCCCCGGCTGTATTGCATCACATAAGGAGGAAAAGTACATAGTATATCATAAAAGATGCTTTTAGCAGGTGAACTCATTTTATGAGGATTACTAGAAAATGGTTTCCTGTGTCATGTGTATTTCTACTTGGATAGGTGTTATATTTTACAGGTGTTAATGTTAGAATGGGATTTTGTGACATTCGACTCTTCTT…
GmaAffx.60859.1.A1_s_at	BU550962	At2g20370	3e-14	Unclassified - Hypothetical Protein NOT Supported by cDNA			ATGGGATCCTTTCTTCTCCAAACCAAAGCCGGGTGGGGATTCCGATGATTTGTCAGCTGAGGCTGCGAAGAATTCTTGGAAAAATGAACAAAGAAATCAGTCGTGATTAGCAAAGGGGAGGTAAAAATTGCATCTGTAGGCNNNNTAGATGTGGTTTAATGCTGACTCAAATGGTTTCCCTGAATTAGGGAAGAATTACAGCTATAAAATAATTGCTCCGCTCTTGCTATATGAAAACTTACTGCAATGCATGTGATTGTGTTTGCTGAGCAGGCTTCCTCATTGAAGACCCCTAGCATGGAGAGATGTTCTCTGCTTTTTACAGTTTTGTTATATAGATTTTTTCTTCTTCTGATTTCTGCCTTGTTATTTGCGTTAGTGTTTCCTAGATGTATTTTC…
GmaAffx.87739.1.S1_at	BE440603	At2g28110	4e-42	Unclassified - Hypothetical Protein NOT Supported by cDNA			ACTACAAATGGGTTCTCTGGCTTTCTCTTTCCCTCTATTTCTTCACCTCCTACCTCATCAGCAACAACAACAACAACAACCACCACTCCAAACAACCATCTCACGTCTCGAGAGCCCTCATGGAATCAAACCACACCACACCTCCTCAACAACAAGCTCTTAACTCTCTAGGGTCTTTGAAGAACTTGAAGGTGTTTGTNTANGANCTTCCTCNGAAGTACAACACGGATTGGTTNNCGAACGAGAGGTGCAGCAAACATTTGTTNGCGTCGGAGGTTGCAATTCACAGGGCTTTGTTGACCAGCGAGGTTCGCACGTTTGACCCATACGACGCTGACTTTTTCTTCGTCCCCGTTTANGTGTCTTGCAANTTCAGCACCGTNAANGGCTTCCCNGCGA…
GmaAffx.89865.1.A1_s_at	CK606142	At1g55360	1e-173	Unclassified - Hypothetical Protein NOT Supported by cDNA			AGCTACTGGTTGTTATAATCTCCTTTGCTCTGGCTTTATTCAAATTAACAGTGATATAGCCCTGGGAGCAAGCATCTCCCCACTTTCTAAGTATAGCTCTTCCCAATATGATATCAGCATCCTGGTCTGGAAGGACCCCAAAGAGGGTAACTGGTGGATGCAGTTTGGNAATGANCATGTTATGGGATACTGGCCGGCTCCTCTATTCTCGTACCTCTCNGACAGNGCGTCAATGATTGAGTGGGGGGGAGAGGTNGTGAACTCNGAGTCCGACGGCCAACACACCTCGACTCAAATGGGGAGTGGCCATTTCCCTGAGGANGGTTTTGGCAAGGCTAGTTACTTCAAGAACATTCAGATTGTTGATGGTGACAACAAGCTTAGAGCTCCAAAAGACCT…
Gma.1830.1.S1_at	AW780481	At1g08580	2e-14	Unclassified - Hypothetical Protein NOT Supported by cDNA			GAAGACATTGAAACTTAAACAACTCAAGCGCAAAGGGAAGAACAAAAGAAAATCTGATGTGCCTGCTGCTGATGTTTCAGCCGATGCAATGGTGGAATAAACAGGAAAAGCTTTAATATTCTACGTACTTGGTAGGGTGGAGGTAGAAGAGGCAATGTCTGATGGTATAAAATGTTGTAACCCTCGACTCGAGTGATTGTTATGGTATTCCTAT
Gma.3555.1.S1_at	BU764259	At1g72510	4e-48	Unclassified - Hypothetical Protein NOT Supported by cDNA			ATTTGCTGTATGTGACTGTTGTGGANNNNNAGAAGAGTGCACCCCAGCCTATATAGAAAGAATCAGAGAGAGGTACTTTGGAAAATGGGTTTGTGGGTTGTGTGCTGAGGCTGTTAAGGATGAAATTGTGAGGTCTGAGAGACTTGTTTGCACAGAAGAAGCAATGGCTAAGCACATGAACTTCTGCAAAAAGTTCAAGGCATCAGGGCCTCCTCCAAATCCGACAGTGCACTTGATATCAGCCATGAGACAGATTCTTAGAAGGACTTTGGATTCTCCTAGAGTAAGGTCCACACCAAATAGTCCAACCAAGACTCTCACAAAAATTCATGGTTCTGTGCTTACAAGATCTGAGAGCTGCTTCCCTACTCTCTCTGAAGGGTTGTGATGAAGGGAATA…
GmaAffx.7416.2.S1_at	BG352899	At1g76020	1e-64	Unclassified - Hypothetical Protein NOT Supported by cDNA			AACACAAGTAGTTGGGAGCTCTTATTATAAAACCATAAAGAATGGCTTCAATGACACAACAACTGATATTCAGACCAGAGTTTCTTTTAAGTATGCTGCTTCGAGAGGGGTGTATGGAACGCCATTTTTCTATGTCAATGGATTCTTGTTGCCTGATACTGGAGCTGCTGTTGACTACAAGACTTGGAGAAAGGTCATTGACCCATTGGTTGGTGCTAAGAATAAGAAGAGTATCCAAAATGAAGAGTCCCTTCATTTCTTCTTGTGAAAATTGTCGGTATATAAATAAAGTCCAGTTGCATTAGCACTGTATCAGTGAAGGAATCTGAAGAATGTATCCGCTGACTAATAATGGAATCAAATGTTATAAAACATTCCTTAGTCCATACATATACATAT…
Gma.4299.1.S1_at	BE822291	At2g12400	1e-41	Unclassified - Hypothetical Protein NOT Supported by cDNA			TTCAGACATTTGCAAGACACCCGGTCGGATGACTCCAACCGTTTATGGCCAAATGGAAGCTGCAGTGAATGTAAGCTATGGTTTATATCATTATGGCCCATTCTTGGTTGGCCTACAAGACTGCACTTTCGTTCGGAAAATATTCACAGACATCAGCAACAATCACTGCCCTGGTCTGCAGAGAAACAGCCAATTGATTTATATTGGGTTGGTTTTGGTATCAGCTGCTGTAATGTTGTCTTTGATCTTTTGGGTCATCTATGCAAGAGAACGGCGGCACCGCGTTTATACTAAACAGTTCATTGAAGGCTAAATGTGTTGGGACTTAAACTACATTAGGTACATTATGGTTCTCAGGTACATTTGTGTTATAGATTGTATTCCAGGGTTGGGTCTCTT…
GmaAffx.84688.1.S1_at	AI460889	At4g14240	6e-55	Unclassified - Hypothetical Protein NOT Supported by cDNA			AAGTCTTCTTACTGTACGACCAGAAACAGAGACACCTGTCAGTGCTGTATCCATCCGGAGAATTCCACGGGTTCCATCAGATATGCCTCTCTATGATATACTAAATGAGTTCCAAAAGGGAAGTAGTCATATGGCTGCTGTTGTTAAGGCTAGGGGAAAAGGCAAAGAAACTCCACAAATCATTGATGAAGAGAAAAATGAAGAAAACAAAAGCATTGGTGGGGATTCACAGTTGACCACTCCGTTGCTACAGAAGCAGGATGCAAAATCAGGAAGTGTTGTTGTTGACATAGTCAAGCCTTCAAAGCCTTCCAGCATTAATAAGCTGTCTGTTTTGCAACGTAGTGATAGCACAACAAATGGTCCCTCTTC
GmaAffx.32615.1.S1_at	BQ628912	At4g17110	4e-23	Unclassified - Hypothetical Protein NOT Supported by cDNA			ACTGTATCGCGGAGTCACTTGTTGAGGAAACAGAATTTGAAGAGTTGAAGGTTTGGTCTGCACCTGACTCATATCCATGGACCTGTCATATCTATCCAGTACAGAGTGATGCTTTGCATTTTGTTGCTCTACGACAAAGCAAGGAAGAATCCGACTGGAAGCCAAAGAGGGTCCGTGATAACCCTCACTGTCAGTTGCAATCACCTTAGTCTTTAAACTGGTTAACCTCCGTTTTTTATTTCTTTGGAGGTCAGCTCCAAAGAATGTGCGTGTGCCATCTCCGAAAGAAGACAGTAATGTAAGTTGGACGATGTTTATAATAGGAGAGGCTGTGTTTGTCGCGTGATTATTATTACTACTTTCCAGCATCCAATGGTGATGGGACTCAGATTGGGATCA…
Gma.2910.1.S1_at	BE822330	At4g01290	5e-25	Unclassified - Hypothetical Protein NOT Supported by cDNA			TCCTCCCGTTCATCATTCTATGTTACAACAACAGATGCATATGCAAGGAAACCTTCCCNCACCTCATTTATTACGTGGATTCCCAAGNGGTGCACCTATGCCANCTCATNCNAGCAATCCAATGACTGGCTTCATGCAGGAACCAAACCCNATGCAANGNCAAGGCTTCCCATTTANTGGTCACCAGCATCCTACTTNTGGTGGCCCTGGAATGCAATTACAAGCTCCTGATGTTGGNGGTGGAAGAAATCATCCAGAAGCACTTCAGAGGCTTTTTGAGATGGAGCTGAGGTCAAAAAACCCAAAGCCAATCCATGCTTCAGGTCACAGCCAGGGGATGTATGGTCAAGAGCTAGACTTGGGTTTTGGGTATAGATAGTGTATTGTCATTGTTGATGT…
Gma.17662.2.S1_s_at	BQ630190	At3g14280	1e-11	Unclassified - Hypothetical Protein NOT Supported by cDNA			ATGGCTGTAAACTGTACTTCCTCAATTCGAATCCCAATTCAGAAATATGGATCATTTCTCAAGTACCCCAACAAAAAATTGATGTCCAAACGCAGCTATGTCCCAATGAAAAAGGCATCGGTACTGAGGATCACAGCATCCATCAAGAACAAGGTTTATGAAGATCACTCNCAGGGCATAATCTGCTACCAAGATGAGTTTGGAGAAATAGTTTGTGAAGGGTATGATGAAGGGCCTTGTTTCCAAAGAATTCCAGAGACGACCAATCGTCCAAGAGATGCTCAAATCACGAAGAATCTTCTTTTACGACAAAGTTGGATTCAGATAGTTAAAGGAGAGAACTCGAATGATGGTCTGCAAAAGGACTTGAACTGTAATGGCTTTAACTCATTCTGCTAA…
Gma.7551.1.A1_at	BG650203	At3g28970	6e-10	Unclassified - Hypothetical Protein NOT Supported by cDNA			CCTCCCTGGACTGAGAAGTTTTTCTGGTCTAAAGAGGAAGTTACCCGAGGACTTGAGCAAAAGTGATGATATGGATTCCAATGACATGATTCTTTCAAATTGTAAAAGNNNNNNNGCTCATGATGCGGTGGATTTGGAGGACAATCCACCAGGGAATACAGCAGATGACTGTATGGAAACCAGTAGACAAAATAGTCCGTTGTGTTCATCGATGTCCCCATGTGCAGTTGAAGGTTGTCTGTCTAAGGGATTTGCAGGACTACTCTCAACTCGTTCCTTTGTGCAGTTTGGTAGGGAGAGAAGGGCTTCCTTTTGATGAAGCACCCCCACCTATAGTTAAAGAAGTATATAGAAGTTTCTTTTGCTAGTTGATATCTGTTGATGTATTCATTTTGAATG…
GmaAffx.43754.1.S1_at	BM525005	At2g26570	1e-59	Unclassified - Hypothetical Protein NOT Supported by cDNA			GAAGGTGGATCATCCCCAGAATCAAAACATGGAAAGAAGAAGAAGAAGTCAATTTTCCCAAGGGTTTTGATGTTCTTTGCAAGAAGAAAAACACATTCAACCAAGTCTGGGTAAATCCCAAATTATACTGCAGTTGTCTTGGCTCTCATCCTTTTTGGAGATCTCACAGTGACTTGAAATGCTGGACTATTCAATTGCACCGACCTGTAAATGTTGGCGATTGCTGTGTGTATGCTTTGATTGTATTCTCTCTCACTGAAGGGTTTGGTTTGGTATATGGTCGCCTGCTCAGTGTTTTACGTGGACATAAAAAATAAGTTCATCTTTTGTGGGAAAACAGAAAATTAGATGATTCTGTATTGTGTATAGCTTCTGATATATTGAACCTCGGCTTTTGTA…
Gma.2498.2.S1_at	BM271411	At2g26780	1e-31	Unclassified - Hypothetical Protein NOT Supported by cDNA			AAGTCCGGGCAAGCACCTTTGGCCAGTGACGCTGCTGGATCAGAGTTGAACAGTGTTGAAGAGATTTCTGTTCCACATAACAAAATAGTTGACTGTTTAACCTCTTGTATCCATGTGGCACATATAAATGATATTCTTGAAAAGCAAAAGGGCTTAGCACACATGTATACAGCATTCTTGTTACCTGAACATAAATGGACTGTCAAAACTACAGCCTTTGTATCCATCAGAGAACTTTGCTCAAGGCTTCAAAATGTTGTGAAGGACTCCCAGGGAAGTAACGAACTTGCTGGAGCAACTTCCTTTGTTCAGGAGATATTTCATTCTCTGTCACCAAAAATACTACATTGCATAAGCACAATAAAGATTGCCCAGGTTCATGTTTCAGCTTCAGAATGT…
Gma.9518.1.S1_at	CD393486	At2g44360	6e-48	Unclassified - Hypothetical Protein NOT Supported by cDNA			CAGACCGAGAAATCCCAATCCTATGGCAGAGGAAGGGAAACCCGATGAACAGCTCTTTCAGCTTCTCTCCAATCTTCTCCACCAGGTGGAATCACTGACGAATCAAGAAGAAGTTGAGCTGCGTTCTAAAATTGAAACTCTTGGATTAGAGGTTACAAAAGTTCCTTCAAAGTCAACGCAGCACCTTAACGAGTTGGAAATAGCTGAGGAGTTGGATAAATTATCAGCAAGATTGGATAATCTTGATGAGATGATATCATCATCAATGGCTTCAGATCCACAGGTGCAGTCACTCTTGAGTGATACAGCCGATGTGTGGATGCCAGTTATCACTGCTACTTCTGAGGAAAGGCGCAACTTCACAGCGGCTACTGGAGACAGCACCCTCCAAACTGATGT…
Gma.7763.1.A1_at	BU550040	At3g10650	0.002	Unclassified - Hypothetical Protein NOT Supported by cDNA			ACAGAACCCTTCTCCTTTTCAGGCTTCTGGCAGTCTAGGAGGGAGTTNNNCATTGGGCACAGGTGGAGGTGACAAATCTGCTAGAAGAATTGTGAAAGTTAAACATAANCCACGCAAGAAGTAGNNNCNNNNNNNATGAAAATGGTTACCTTGTATCATGCTGCAGGCTAATCTTATAGTGCAACAAATAAATAAGCTCTGAAGAGTGATTGCAGGATATTACTGCTCACATGGCAGTCTGGACAAGTGGGGTGCTATTGCTAATCAGCATATGCAAACTTGTCAGTCTTCTTTTCCCTTCCATATTCAATAGAATACAAGGCTGAAGTTTTACCAATTTTGTATTAGTATGATATGATGAAACATGACGTCCTGTACTACCAGTAATGGTTTTAGGTC…
Gma.4253.1.S1_at	BI972239	At3g20015	2e-39	Unclassified - Hypothetical Protein NOT Supported by cDNA			GTTTTATTGCCCAGACCACGAACCTGCCCCGGGCTTCGGGAGTATCCATTTTTGACACGTGTTATGACTTGTTCGGGTTTGTGTCGGATCGGGTTCCAACCGTGTCGTTTTACTTCTCGGGTGGGCCTATTNTGACCCTGCCAGCTAGGAACTTTTTGATCCCAGTCGATGACGTGGGAACTTTTTGCTTCGCCTTTGCTCCTTCTTCTTCTGGTCTTTCCATCATCGGAAATATTCAGCAAGAAGGGATTCAGATTTCGGTTGATGGAGCTAATGGGTTTGTGGGATTTGGACCCAATGTTTGTTGAGTAATAGTAATAGTAATAGCCATTGCCATGTATATCAACCAACGATATGAATTTTTCTAGTCTTAGTCATGTAACATATAAAAGAAACAAC…
GmaAffx.69457.2.S1_at	BI943979	At3g52870	8e-15	Unclassified - Hypothetical Protein NOT Supported by cDNA			GGGCACCAACTTTCGCATAGATGGTCAACCGGGGCAGGACCTAGAATNNGNNGTGTTGCTGACTACCCTGTGGAGCTTAGACTACAAGCCTTGGAAATGCTTAACCTTTCTCCAAAAGTTCCTCCTTCTCCTTCCTCATACAGGTTTGTGGGTGGTCTTGTGTCGCCTATGGCCAATGGCACTAGAATTGACAGTGATGAGAATTCTGTTCATTGAGCTAGTAACTGATCTTAGGATTATGAATGACGCTTCCTGCCTAGTGTAGTAACACTTTAAGGTTTTTTCTGCTAAGCTTTTAAGTTCTTTAGTTAAATGTAAAATACCTGTTCTTTGTGTTTG
Gma.1760.1.A1_at	BE822283	At3g48050	0.004	Unclassified - Hypothetical Protein NOT Supported by cDNA			GATTCGGTTACACGCAACATTCATGGCAGTAGTGTCATGGCTCTTCAACGCAAATATTCAAGNNNAGCTTTTTATGGAAAATGTCGGAAAATTGGGGATATTTTTGAGTGTTGAGCCATGGACAATGAGCAGAGATGTTACCCTTGCTGCTGATATGCTTCTTGAATTCTGACTTGATAAAGCGATCAGAGCCTCTGATGCAGTTGTTTTGTATGAATCTGCTCCCTTATTGTCGCTTGCAGATAAAGTTTTTCCTGTGTAGATATCTAACTGAAACAGTTGGTGTGATAATGCCGCCTAGAATCAGAGAAATGGGCATCAAGTGTTTGACTGTGACTGCTCTGCAACAGCACCGAGCCCAATCCATTCTCGAGCATTTGGAAGGAGAGGATTGGATGT…
GmaAffx.91222.1.S1_at	CF806947	At3g48050	3e-22	Unclassified - Hypothetical Protein NOT Supported by cDNA			GCAAATATTCAAGAGCTATTTTGGAAAATGTCAGAAAAATTGGGGATATTATTTTGAGTGTTGAGCCATGGACAACAAGCAAAGATGCTACCCTTGTTGCTGATGTGCCTCTTCAGTTCTGACTTGATAAAGCGATCAGGGCCTCTGATGCAGTTGTTTTGTATGAATCTGCTCCCAGATTGTCGCTTGCAGATAAATGTTTTTCCTGTGTAGATATCTAACTGAAAACAGCAGGTGTGATAATGCCG
Gma.4440.1.S1_at	AI442853	At2g35860	1e-119	Unclassified - Hypothetical Protein NOT Supported by cDNA			TAAATTCGGTCACGGCGATTCCTCCGCCTACCTGTTTGATCCTGATATTTACACTGATGGTAGGATCTCCGTTCAGGGAATTGACGGCGTTCTTATCCCTCCTGAAGAAGAAGAAGAACGCACTCGCCGCACCACTCCACTTGTTAAGGTTGCTGCTCCTAAACCAAGAAGAGGGAAGTTGATGGAAATCGCTTGTAGCATGTTTGGATCTTTTGGACAAGTCTGCCAATGAAATCGCATTCTCAACTAATCACAAAAATAATAAAGAGTGAATGTATGTAAACTCGAAGAATGTTGTAGAGTAGTCATTTCAATACAAAGGATGGATGCATGGTGAATCTATAAACGGAGAGCGAGCGATTACACGGAAGATAACAAAAACAAATTTTCTGTCATTTT…
GmaAffx.71245.1.S1_at	AW830372	At2g40420	4e-68	Unclassified - Hypothetical Protein NOT Supported by cDNA			CATAGGATCCCTCGCAGTTAAGATTNGCGTCATCATAACCAATTTGGGGGTTCTTATCATCTATTTCATTATTCNNGGAGACGTGCTCTGTGGAAATGAGTCGAACGGTATCACACACTTGGGTATTCTACAAGAATGGTTTGGCATCAACTGGTTGACCTCTCGTGCTTTTGCTCTTCTTTTTGTTGCACTCTTCATAATGCTTCCACTTGTTATGTTACGTCGTGTTGATTCACTGAGGTATAGTTCTGCAATATCAATCCTACTAGCATTGGTGTTTGTTGTAATATGCTCNTCAATGGCGGTTAGTGCATTGTTGTCTGGAAAAAGTCAGACACCGAGAATAGTGCCTGATTTCTCTCAAGTCACTGTCCTTGACCTTTTCACCACTATACCAGT…
Gma.7057.1.S1_at	BE658762	At1g05840	7e-99	Unclassified - Hypothetical Protein Supported by cDNA			AAGATGGTATCTGGTGTATTGGCTGGCAGANAAGTGTNGCACAAACAAAGAATGGAAAGGACATGACCCTTCTTGGAGATTTGGTGCTATCNAACAAACTAGTGATATATGATCTTGAAAATATGGNCATTGGATGGACTGACTACAATTGCTCTTCCAGCATTAAAGTGAAGGATGAAGCGACTGGAATAGTACATACAGTGGNTGCACACAATATTTCTTCAGCTNCTACCTTATTTATNGGAAGAATATTGACTTTCTTTTTGTTGCTAACTNCCATGCTAAACAATTAAATTAACTTGGTCTTGATATAATANGNATGNCATTCATTCNATTNTGTTGTACCATAATTCCTNNNNNNNNNNNNNGTGCAGTGTGGTTGNTATGGTATAGTCAATC…
GmaAffx.74165.1.S1_at	BQ611537	At3g12050	2e-13	Unclassified - Hypothetical Protein Supported by cDNA			GGTGGCGGGATCTTATTTTCCAGAGGATACGTGCTGTTTTTGGTTTTGGAATTTGAGATTTTTCTGATTGTGTTTCCTGCGTTGTAGAATTCGCTGATTTTGACATTTATTAGTAAGGAACGATTAATGGATGATTGAGATTATTGGATATTGTGGATTGCAATGCTTTCTGCTTCTGCATCTTTAATACTTTATGCATCTGTGGTTGTGCTATTTGGCATGCTTGGTGTGAATGTTGTTTGTGAT
GmaAffx.91706.1.S1_at	CF807431	At4g12790	2e-31	Unclassified - Hypothetical Protein Supported by cDNA			AAATTCATCCTTCTCATTCTTGCATTGTCTACTTTGCCATCAGATTTTTACTCTTGCGACCAAAGTCATAAAATTCCCAGAAAGGAAGCAGTAATGGCAAGAGAATGATCAAGCTAGCCAATTTTTCATCCCATTTAGAGGATAAACTGTATAAATGTTCAACTTCCTCAATTCACATTAAAACAATCTAATGAGATACTACATATTAACAACTTCAGCTTGGTACACCATAATGTCGAAGTTAAGCAGAACTTTCAATTATACCAAGCAGTGTTGCAGAAGGGGATTGGCTACTCATCATCCTCAGGGTCAAAATCCTTAACCTTCACATCTGCATCTTCTCCATATTGAATGCAGTTGTCAATTTGGGCCAGTACATATTGTATACTTTTTTCCTTC…
Gma.6859.1.S1_s_at	AW309700	At1g63970	9e-86	Unclassified - Hypothetical Protein Supported by cDNA			ATCAACATTCCCCACGATAGAGGTTGCGAGGCTCATTCCGATGGTGACGTTCTGCTTCACTGCGTTGTTGATGCGATTCTAGGGGCGCTAGGTCTTCCTGATATTGGCCAGATTTTCCCCGATTCTGATCCTAAGTGGAAGGGTTGTGCCTCTTCCGTCTTCATCCATGAATCTGTGAGACTTATGCATGAGGCTGGTTATGAGATTGGGAATTTAGATGCTACATTGATACTTCAGAGGCCAAAACTAAGCCCACACAAGGATGCTATCAAGGCCAACTTATCTGCACTGCTTG
GmaAffx.37882.1.A1_s_at	CD396401	At3g12760	7e-05	Unclassified - Hypothetical Protein Supported by cDNA			TCTTGTGATGAGTTGTGCTATTCTGTGATTGAACTCCTCTTTGTTATTAAGTGGGATTCNGTCTAAATTNNNAGNNNNNATNNNTNCTAGAGCAAACTCATTCTTNNTGACAAGTAGTNGCATCATTTGTGAGATTGTTGATATGGCATATGAATTTCCTTGGNNNGTATTGTGGAATTAGTAATGGGAGCCTACTAATTCCACGGTGTTATAGTTTCTGGTCTC
Gma.10779.2.S1_at	BU578186	At3g13410	7e-72	Unclassified - Hypothetical Protein Supported by cDNA			TGGTGCAAAATATGCCGTTCTTTATGTGTCGGATCCCTCNAGGTCAATCCAGTATCCTTCTTACAGGGATCTGCAAAGATTTCTAGCAGAAAGTACAGCCGGGAATGAATCAACCAATTCCACAATTTGTGATGAAGTCTGCCAGCTTAAATCATCTCTTCTAGAGGGAATTTTAGTGGGTATAGTTTTGCTAATAATTTTGATATCGGGCCTTTGCTGCATGATGGGAATTGACACCCCAACAAGATTTGAGACGCCACAAGAGTAATGATCCGTTTGCTGAA
Gma.5711.1.S1_at	BI784811	At3g14260	6e-38	Unclassified - Hypothetical Protein Supported by cDNA			GGAGGGTTATAGATTTCCAGTTCCAGGAACAAGGAATGACCACAAAGGACCATGCTTTCGAGTTTCAAAAACTTATAAGATCTCTAGAGGGGGTTCAACCTATGAAGTTGAACTTGGATTGGACAAAAATCAACCGTATACTCATAAAATAGAACGCAACACTTGCAACTCAGCTTGCAAAATATCTAACGAGCTTGGAGTGGTAGTTGCAGAGCTAAGGAGAAAGAAGTCACCTTGTGGAGTTGATTTAGGAGATGATGTTTTCACGATGGTAGTGGAGCCAAATATAGATCTTTCTCTAATTATGGGGCTTGTTGTAGCCTACAATCTTATAAACTGTAAAATTTAATTAGCACTTTGGAAGCAACAGTTTGCACAATTAATAGTGATTTGCATCTT…
Gma.6554.2.S1_at	BQ627729	At2g46080	0.0002	Unclassified - Hypothetical Protein Supported by cDNA			GTGCGGGTGCTGAGAAGCTTTCACAAGGAATTGATCTTCTTGCAAAGGGAGTAGATGGGTTTTTTCAAGCCGTTATGACTAGTCGCGATACTTTGNTCAGCTCTGTGAGGTTTGATAAAACTGTAAATGATCGTTCCCCAGGCCGTAACAGAGACATGCAGGTAGTTCACTAATTATGCAGTAGCCTAACTCTGGTAGGTTTTGGGGGGGTGTTCCTTTGTAGGATTAGTAGTATTTTCGGTCTTTAGTAGTATTTAGCCGAAAT
GmaAffx.90735.1.S1_s_at	CF806460	At3g02420	3e-70	Unclassified - Hypothetical Protein Supported by cDNA			ATACTTCATCTACTGCCTTACATTTGTTACATCTCATCTTTGCCTTAAATTTGCTTTGATCCCTATCTTATGTTGGTCCTTTGAACATGTTGCCAAGTTCCTTAGACGTAATTTCAGTCGCTCTACCTTGTACAGGAAGTACTTGGAAGAGCCTTGTGTTTGGGTGGAGTCAAACAGTTCTACCCTCAATATAGTGACATCACATGCCGAGATTGGACTTGGATTCCTGCTGATAATCTCATTGTTCTCGTGGCAGCGGAACATAATACAAGCATTCATGTACTGGCAGCTTCTGAAGCTCATGTATCATATTCCTGTTACCGCCCCTTACCATCAGAGTGTTTGGG
GmaAffx.92269.1.S1_s_at	CF807459	At3g04830	3e-92	Unclassified - Hypothetical Protein Supported by cDNA			CCATCCATAAGAGGAGGGTGGCAATGGCAAAGGCACAAGGCAAAATTTCTGTGGCTATTGATTGGCTTAATAAATATCTGGAAACATTCATGGCAGATCATGATGCATGGAGAGAATTGGCTGAAATATACATCTCCCTGCANATGTATAAACAAGCAGCGTTTTGCTACGAGGAGTTGATATT
GmaAffx.92984.1.S1_s_at	CF808141	At3g08610	2e-16	Unclassified - Hypothetical Protein Supported by cDNA			TGGGAAACGCTCAGTATTACATTCACANANCNGCNCATGGCAGACCTAAGCACATCGGNAACGATATGTGGGANGTGGCNATGGANCGAAGGGACAAGAAGCTTNTCGAGCAAGCCTCTCCCTCCAATTAACATCGTTGTTTTGCCNATGNCATTGTGAAGAAAATAAACTGCTCACCTGGATTTACGNCTGTGTTCTNGGGAAGCAGGGTTAATCACAAGAATCAAATTCCGTCTGTTTTCTTGTATGCAATTCAACATAAG
GmaAffx.21378.1.S1_at	AI856773	At3g10250	1e-54	Unclassified - Hypothetical Protein Supported by cDNA			GAGGTGGTCCTAGATCCAGACACTTCTTCATTTGGATTTCTGGGGCAGATTCCCAGAAATTTTAGCCTTTCAGATCTGACTGCTGATTTTTCTCAGAGTTCTGNNNNNNNNNNNNNNNATATACTGGAGACCTATTCTAGGTCACCCTTCCTAGCTACGGATAATGAGAACTTCCTTGACAGAGGAGAACANGACAANAATAGGCTGGACTCCATATCAGAAGGCTTGAGTTATGAAGACTTTGGGAGTGAGTGAATAGTTGANTACCATTTAGTCATCAAACTTTCANGTTGAACAAAATGCTTAAAATGTTGTACATAAAACTTTAGAGGTTTTGAAATTTTAACTGTTGGATGAACATATGCATTGGTGTGTAGAACGTGCATTCACCTCATTCTT…
GmaAffx.92133.1.S1_s_at	CF807858	At2g33220	7e-34	Unclassified - Hypothetical Protein Supported by cDNA			ATATAAGGAAGAAGCCCGGGATGGCGAGCGTGAAGGACATGCCGGTTCTCCAGGACGGTCCACCACCAGGCGGGTTCGCTCCGGTCCGGTTCGCCCGGCGCATCCCCAACAAGGGCCCCAGCGCCGTTGCCATCTTCCTCACTGCTTTCGGCGCTTTCTCTTGGGGCATGTACCAGGTCGGCCAGGGCAACAAGATCCGAAGGGCACTGAAGAAGAAAAGTATGCTGCCCGCCGATCCATACTGCCTGTGCTACAGGCTGAAGAGGATGAGAGATTTGTTAAAGAGTGGCATAAATATCTCGAGTATGAGGCAGAAG
Gma.6357.1.S1_at	AW459487	At2g37110	5e-87	Unclassified - Hypothetical Protein Supported by cDNA			CATTTTGGAAGATGAGGTGCAGCGTGAACANTGTGAGTCANCATGTGACTTGGCAACTCATGTCTTCTGTCATGTATGTGCTCTTTGTCAAGAAGGTCGTGAGCTCCGTCGNAGGTTACCTCATCCTGGCTTTAATGCTCAACCAGTACTGGTTATGATTCCCCCAGGAGAGCAGACCATGGGACGTGAGGCTTGAAAATTT
Gma.17789.1.S1_at	BG511704	At2g38310	9e-67	Unclassified - Hypothetical Protein Supported by cDNA			ACTCCATCAACGATGATTTCACAAAAACACTGTCCGTATCTTTCTTTTTTAATTTTTACCTTTTGTAATTTAGCTATTAATTAGTTGTTGTGTACTTTTTGATTAATATCACAAGGTTGTGTGAGTTTGTGACTNTGTGTCTGAGAGGAAAAACAAAAGGAGTCTCTTAATTTTACCCTTGTGTGATCGNTNTGTGTTTCTCTTTGTTGAGANAGTGAACATGAACCAAGGATTTTATGTAATGTTGGTGTAATCTTTGTT
GmaAffx.71101.1.S1_at	BI784912	At2g40430	3e-23	Unclassified - Hypothetical Protein Supported by cDNA			GTTGTTGTTGGCTACCAAACTTATGTCGCTCCAAAAATTCTGGAGGCGTTGATGTATGGTAAGAAGAGAAGGTGATGGATGAAATGAATACCTATAAAGTTTTTCTAAAGGAAGATCATGTTTCTCAATTGTTTGGCCTAATATATGTGTATTATTTTTAATGTCAATTTATTTAGTAAGTGGAAATGTCCACATGTATTAGAACTCCTTTTTGCATCGTTATATT
GmaAffx.73085.1.S1_at	AW459316	At2g41760	1e-75	Unclassified - Hypothetical Protein Supported by cDNA			TCCACCACACTCCTTTTTATTGTGAGGAGAATGTATACTTGCTTTGCAAAAAGTTGTGCAATGATGGAATAGCAAATGCTGATGGATCTGATCTTTTTGTTGCTTTCATTTCCAACGAAAAGAAACAGATCCCACTTTGGAATCAAAAGGCTAGCAAAAGAGCTGATGGGGTGATTCTATGGGATTATCATGTAATTTGCATTCAGATAAAACAAGGAGCTGTCCCTCCACTAGTGTGGGACTTAGATTCGACTCTTCCTTTTCCTTCACCTCTACCATCATATGTGTCTGAAACAATTCGTCCGTCTTTTCAGCTTTTTTCTGATTATAATAGATTATTCAGAGTTGTGCATGCCCCGCTATTTCTTCGTTGTTTTGCATCTGATAGAAGACACATGA…
GmaAffx.10329.1.S1_at	BG511541	At2g42570	2e-43	Unclassified - Hypothetical Protein Supported by cDNA			AGAAGCCAGTGCATTTCCTAGATGTGACTACACTCTCACAGTACAGGAAAGATGCACATCCAGAAGGCTACAGTGGGGTTATGCCAACTGATTGCAGCCATTGGTGTCTTCCAGGACTGCCAGATACATGGAATGTGCTTCTGCATGCGGCTCTATTTGACTGAAGGAAAGGAAGCAGCTAGCTAGTGACTTGCAAACTTTGTTTATTAGAGGAAAACCAATTGTTTTCTAATGTAGGAAATATTTAATTTGGCATTTGGTTTCTTGGAATTGGACAATAAAAGGGTTTGATTCTACAAATTGTAAATTTTCATATTATTTTGGCATAGACATGCCTTGATTGTACCAAATAGCTCCCCTTTGGAATATTGAAAAGCATTTGCACTGATGTTTCCTTTG…
Gma.8087.1.S1_at	BM093904	At3g44150	1e-82	Unclassified - Hypothetical Protein Supported by cDNA			AGATGGGTGTGCTAAATGCTCGAGTAACTCGAAAGCTGTCTGTCTCAACAATCAGGATTGCGCACTACAAACATCCACCTGCAAGAGCCATGGAGGAACTGTGGATTGCAGCATAGGAATACAATTGGCNTTCTCTGGNACAGATAGACACCTTGCAGTTCTCAACTCTTGGTATGAAGTGAAAAACCTTCGCCAGTATTCACTCTATGGTCTTTATTCAAATCTGAGAGATTCCCTCACTAGCCAGTATGATAAGTTTTTTTAATTCCCTTTAGTTCTTTGGTTAGTTTTATCTGTACCATTCCNTTGTNATTTGCTCTTGTTATTACTTTANCCACATCCCAACCCTTCTCTTATCAATATATTTGTGAAAAACCAGAATGANGGCNTGTATATTTA…
GmaAffx.6597.1.S1_at	BQ628751	At3g51980	3e-13	Unclassified - Hypothetical Protein Supported by cDNA			AGAACCACTGAAGCTCGGGTTTTCAAGGACTTTTGTGCTTTAGGTGATGCACTGAACAGAATGAGACANNNNNNGNATGATTTGATGGCGGATGAGTATCAGAGAGACTATGTGATGGATGTGGAAAATCTTCGTGTTGAAGTGGAACACACTTTCCNAAGAAAGCTGAAGCAATCATGAGTTGACGTGTCCATAAATCTTGTATCAGTATCTAGTTTCTAGAGATTTCTCACAATTTTGAAGCTGCTGTAGGTGTTTGATGAATTCATGTTAATTTTATAGGTGTACAGGTTAATCCCCGTCAATATACTAGTACCTGGTGATTTGTATTCTGCCATTAGTCCTTTTTTACGTATAGAATTTGTGTTAACAGGCGTCTTTT
GmaAffx.57462.1.A1_at	AW350198	At3g52610	5e-09	Unclassified - Hypothetical Protein Supported by cDNA			AAATTGAACCATAATCCGCTTCTGAGGCTGGGCAATTGGTTATAATTTCATAATCAAATTCATAAACTTCGTTGCCTCTTCAATTTCAGTCTGTGACTCTGTGATTCTCCTTGCT
Gma.17487.1.S1_a_at	CD392400	At3g56680	4e-90	Unclassified - Hypothetical Protein Supported by cDNA			CCGTAGTTATGGAAGGTATGCTAGGAGTATCCCAACCTCTGCTGTTAACTTGGTGCCATTTAACTTGCAAAAAGCTCAACCTTCATTTGCTCAATATGATGCTACGTTTAATCAGTTAGGTCAGATGTCACAAACTCAGGCCTCACTTGGCTATATACCTCCTTCAACCCCGATAATGGGTCCTTTTGGCACCACAGGATTAAATCAGACATCTAGTGAGGGTGTTTACCTACAGTGGCCTAGTGCTGCAATGATGTATGCACATTCATACGACCAATTTAGACATGCTGTTTTCCAGGCTCCATTTGGTCAACAGCCGTTGAGCTTT
Gma.10907.2.S1_s_at	AI900862	At3g15450	3e-50	Unclassified - Hypothetical Protein Supported by cDNA			GTCAAAGATCCAGGTGATGCCACGTGTTGGAAGTGAAGCTAATTGGGCAACTTGGGGCTAACAAGCTTAGCTGATTCTTAGTCCAGCATTTTTCTTTCTAAGTGGTTAAAAGTGTAACCTAATATGATGAGTGTGTGACTCTTTGCTTTTAGCCCGTTTGGATATCTGCTTTTCTCGTTTGGTTCCATTGTTGTGTACATATTCATACTTCAATATT
Gma.5774.1.S1_at	BG511460	At3g16270	2e-31	Unclassified - Hypothetical Protein Supported by cDNA			GCCGGACCTAATGGAAGATCACCTTTGCCAGACATATTTCAACCAAATTTTCAAACTCAAACTCCTAGCTCAATGATCAACACTTCAAGGAAAGAAGAAACTAAAGCATTTGACTTTATCTCGGACCATATGTCATCTGCTCGTGATTCAAGGAGAATGATTTAAATTTTCTATCTTGTGCTGTTGTGGAGGATATTTACGGTGTGGAATTGATGGATTGACATTAATAGATCAAACGGTTTATAGTTTCCTTACCTGTGCAAAAAGTTGATTTCTCTTGCCGTGATGGAGCATTATAAATGACATTCTACATGTCCATGTTGACAACAAAATAATAAAATGAGAATACGTTTTGGACATGAAGAAGAGATTCAAATTGGTTGCGCTTTTAATTAGATT…
GmaAffx.57851.3.S1_at	BE022732	At3g17800	6e-81	Unclassified - Hypothetical Protein Supported by cDNA			GGTCAGGTTGATTCATGGCCAAGTGAAGATGGAAAACTGGAGGAGCTTCACTCACCGGAAGCCTATGAGATGATCCAAAACCACTTGGCTCTCATTTTGGGCAACCGTTTAGGGGATTCAACATCTGTTGCTCAGATCAGCAAAATCAGAGTAGGACAGGTCTATGCAGCTTCGATAATGTACGGGTACTTTCTCAAGTGGGTTGTCCAAAGGTTCCAGCTGGAGAAGACAATGAAGATTCTTCCTAATGGAGCAGAAGAGAATAGCATTCAACATACTGTTGTAGATGATTCAAGAATCAGTGGTGGAGATGGCCGTTCTCATGTTATGTCCCATCCTGAAGTTTCTACTTTGCCTGGTGGTGGCATCAGCTCAGGGGGATTTGGTTATGGTTCAAAA…
Gma.5297.1.S1_s_at	BM092144	At3g19540	3e-69	Unclassified - Hypothetical Protein Supported by cDNA			GTAATATTAAAGAGTCTACCATCGACCACAGCCAGTTTGGCACTAACAGCTTCTACATGGNGTGGAAGTTCTGTGTTTGAAAAGNNNGTNAACGTGGTTGTTTTTGATANNGCCGAGATAATGGAGTAGAGTTACAGGGACAATACTCAATGTACCGAACATCTCTTGTANGTTTCCGGTTGTGTTATGATTTTAT
Gma.2191.1.S1_at	CD396052	At3g21190	7e-97	Unclassified - Hypothetical Protein Supported by cDNA			CCTAGACTCTGAAGATTCTGAGTTGGAGAAAGTGATTGACTTTTATATTAGTTCTGAGAGTGATGTTTTCGTACCNGCAATATCAGGTCTATTTTATGCAAATGTAGCTGGTAAGAGAATNGGCTCNGGTAAATCCCAGATACTGGTTCCGGCNAATATTCCAGATTCATCTGCTTCTGCCTCCAGTTTCTTGTCCCATTATGTCTCCAAGAAAAACCACTTTGCCTATTCTTGTTACTGTTAGTTCGAAGTGAAGACATTCNTAGCATCCAGTNGNNAATGTTGTGTACNAATTGTNCTGAATGATGNNNCTTTCCAAAATGTACCCTTTCGGGAATTTCAGTNNTATGGCCTAAGGCNTCTTGTTTGANTGTTCACCAAAAAANTTNAAGTTACTGT…
Gma.15963.1.S1_at	CD415633	At4g10300	1e-37	Unclassified - Hypothetical Protein Supported by cDNA			AGTCCAAGCTCACTCAACTGGGTGTTAGGCAATGGCCCAAATGGGGTTGCCCTCCAAGNAAGTTCCCATGGACATATGAAGCCAAAGAGACTTGCTATCTTCTGGAAGGAAAAGTGAAGGTCTTTCCTAGTGGGTCNAATGAGTCAGTTGAAATTGCTGCTGGTGACTTGGTTGTGTTTCCCAAAGGGATGAGTTGCACTTGGGATGTGTCTGTTGGTGTAGACAAGCACTATAATNTTTGAATAATAAGAACTNCCATGAATTGATGATTTTNNTTGGATANTAATAAGAAACTTTGGAGTGGTATTTAGCTTTGA
Gma.7729.2.S1_at	CD403163	At2g43950	1e-105	Unclassified - Hypothetical Protein Supported by cDNA			TCCAACTATTGGAGTGCTGTCTACAAGCGCACCTATGGTAAAGATTTCAAATTTAAAGCTGGTTATGATTCAGAGATTCGCCTTGGCTGGGCATCTCTTNGGGTTGGAGANTGAAGGNGGGAAAGCCAAAACAGCTCCGATGCAGATGAAAGTTCAATTCATGCTACAAGTGCCACAGGACGACATAAAATCTTCTGCTTTGATGTTTCGGATTAAGAAAAGATGGGACTTTTAAGGCTCTACTGGTGACTTTACCTGTTTTTTATATATAAAAAATGGGTATTTGACTTTGGGCAGTTCCATTGTGTTTTAGTTTGTTGCATCCACAGTCCACTCTTTGCAAAAGGGGGTATTGACTATTTGACAGGTTGATATTTCTCCAAGTCAGCTAATTGCTTC…
GmaAffx.41046.1.S1_at	BI094873	At4g25760	5e-15	Unclassified - Hypothetical Protein Supported by cDNA			GGAAGTCTCCAATTCCTTACTTGTTTGGAGGCTTAGCAGTGATGCTGGCTATCATATCTATGGCATTGGTGATCCTTGTTTGCTCCTACAGAAAACGTGATTCTCAGTCATCATCATCATCATCTGAAGTTGATCAAGAAGAAATTAAATCACAAGCAATGTCCAAGAACTTAGAGACAAACTCGGAGCCTGAGGTTCTTGTCATAATGGCTGGGAATCACAACCCCACATACCTTGCCAAACCAATCACTTCTTCTTCTTCAATTTACTGCACTTGTGGGGCTCAAACAAACCCTTCTTCATCCTCATCCACTGAGTGAAGGCTAACCAAATAACAATATCTCAAGATCAACAAAATTTTGCTCTACTCTGGCAGTTTTCTTCCTTTTCAATTTTCAT…
Gma.3126.1.S1_a_at	CD411138	At2g19180	8e-14	Unclassified - Hypothetical Protein Supported by cDNA			GAATGAATCTACTGATGGTGAGGATACTGATATAGAGATAAATGGCCNAGANGGGACAAATGGGACTGTGAAAGTGAAGGTTCTGACATTTTCAGAAAATGTAGCTCACTCAGAAGATGAGGAAGGATGATCCNTAATTTAGCCAAGCCAGTTGCTGCGGTTTGTCATGATGCAATGTCAGGTTGTGGAGAAAAGTCCAAAAAAAAAANNNGGCATGAGAAAAAAACCAATACTGAAAAGGACTGTGTGTGCAAATGGAAATTCCTTCAGATGCACAACTGGTGGTTCTTTTGGGATTAAACCCATCTCACTCTACTTGACTCAACATTGATCTGTTTATTTGCAATGCTAGGTTGAATCCTTGTAGGCTGAATGTGTGTATATATTTATTTATCCAAC…
Gma.8303.1.S1_at	BU550325	At2g24020	2e-52	Unclassified - Hypothetical Protein Supported by cDNA			GATGTTTCCGATTATATGCCCTATTTGGAGGAAAAAAGGACAATANTGGGAAAAGTGATGATGNTCCTTCTAAGGCNGGAATTCTAGGAAACATGCAAAATCTTTATGAGACTGTGAAGAAGGCACAAATGGTTGTCCAAGTTGAAGCNGTGCGNGTGCAGAAAGAACTCGCAGCAGCAGAGTTTGATGGTTATTGTGAGGGTGAGTTAGTNAAGGTAACGCTGTCNGGGAACCAGCAACCTGTAAGNACGGAAATTACTGAGGCAGCTATGGAATTGGGANCTGAAAAACTTTCTCTTTTAATCACTGAGGCATACAAGGATGCACACCAAAAGAGNGTCCAGGCCATGAAGGAAAGGATGAATGATCTTGCACAGAGCTTAGGAATGCCACC
Gma.13345.1.S1_a_at	CD415448	At2g04900	6e-21	Unclassified - Hypothetical Protein Supported by cDNA			TAGTTGCCGCCCCAATTACAAAACACCCCAANTGTTTTTGGAGGCCTTCTAACAGCNGGNTATCTTGGCTTTCTCTGGGACGTGTTATACTGTCGCATTTCTTGAAGACAGAAAATATTCAACCATGGCTCCATTTGGCGGTTTTGCATTTATAGCAGCTTGGGGTAGCTTGTTTTTCTGATGACATCGGCTCTGCATTTCTTAAGCTTTTTACTAAGTAATTACGCTATCACTGAATCAACAGTTGTCAAGCCCATATTATACTTCATATTTGTAAATCTTTTACCATTTGTCTTGCCNATGCAATNGGTTTATGATCATGAAATATATGTATCTACCGATGA
GmaAffx.76359.1.S1_at	BG406101	At1g71110	2e-65	Unclassified - Hypothetical Protein Supported by cDNA			TGTTGTCAATACGTTCATCTATGCAACTGCAAACATAAATGTAACACAAGGTAGTCCTGGCTCTTACAATCAGTCTGGGCCTAGAATGCCGACTTTATGCTACCCTTTTGACTCTCAATTTCAAGAGCGTCAATGTACAGATCAAGAAGTTTCTTCTGCCAATGCTTCAATGGTTTGGAAGAACTATGAATGTGAGGTATCTGAANCTGGCATTTGCACCACAGTTGGCAGGGTGACCCCCNAGATTTANTTGCAGATAGTAGCTGCGGTGAATGAAANCTATGCATTAGAACATTACACTCCACCTTTACTTAGCCTTCAGAATTGCAATTTTGTCAGGGATGCATTCACAAAAATCACTTCAAGCTACTGTCCTCCATTAAACCATTACCTCAAGAT…
Gma.16736.1.S1_at	BE807299	At1g33810	1e-42	Unclassified - Hypothetical Protein Supported by cDNA			CGAGGCAGGGTGATGGCACTTCCACCATGCACGTCCCTGCCTCCAAGTCCAAGCATCATCACCATGACCTCCACGACGACCTCGGAATCGAGATTGATCCTGAACTACGCTACAGCTTCCAGCGCAATTTTCAGTTTCTTCAGCGTGTTTTTAGCATTGACACTATGGTGAAACCTCTTCCTCCTGTCATGGCATACAATGTCTCTCGCAACTTGAACTTCTTCACTCGCATTTTCACACAATTCTTTGATCCTGAAGGTATTGCAAATGCCCAGAAATCCTTGGGCATAGGACAGGAAGATAAAGTTCGCAAAGTTCGTTGAAGACAATGGGGGAAGCACAAAAAAGAATGTGAATGGAAAAAGGGAAAGAACTTAGAAGAGGAAATAGACTTATCTT…
Gma.13383.1.S1_s_at	CD416391	At1g52220	1e-20	Unclassified - Hypothetical Protein Supported by cDNA			TTGTTGCAAGCTTGCCGCCACCATTGCTGCTCCCTGCTAGAAAATATCATCCGGGCAACTTCCCAAGTTCCCCTTTTTCTCTTCTTTCAGGGAGACGGAATCATGTTTCTTTTGTTGTGAAGGCTTCTGGAGAAAGTTCTGAATCTTCAACTACCCTTACTGTTTTTAANGTCTGTTCANAATGNTTTGGGATCAACCTGAGGACCGTCTGGGACTTATTGGTTTGGGATTTGCAGCCATAGCAGCATTTTGGGCATCAACAAATTTGATTGCGGCCATTGACAAATTGCCAGTTTTCCCAACAGTACTGGAATTAATTGGAATATTTTACTCNGTGTGGTTTACTTATCGCTATCTCATATTCAAACCTGACCGGGAAGAGCTTTTTCAAATCTTGAA…
Gma.4123.1.S1_at	BG511670	At1g53400	7e-46	Unclassified - Hypothetical Protein Supported by cDNA			GAAACCTAAGCCTTGGAAGCATCCTCAACCCATAACAAAGACTCAGCTCACACAATTACGTGATGAGTTTTGGGACACAGCTCCTCACTACGGTGGCCGGAAAGAGATTTGGGATGCTCTTCGAGCCGCTGCCGAGGCTGATCTAACTTTAGCACAAGCAATTGTGGATAGTGCCGGGGTCATTGTCCAGAGTTCTGATTTGACAGTATGCTATGATGAAAGAGGAGCAAAGTATGAGCTACCCAAGTACGTTTTGAGCGAGCCAACTAACCTGATTCGGGACACTTA
GmaAffx.1301.37.S1_at	BI321301	At1g59710	1e-83	Unclassified - Hypothetical Protein Supported by cDNA			TGAATGGAAAGCTTTATCCTCTTCGNCTTGCAGCTTCCTCCAAACACTGTCACCATGCGGGTTGTTTTGGTTCTTCCCATGTCAAATTTGGCAAGAGACTTTGAGGNACAAGGCTTACTGTGAGAAGCCTTNAGAGTTTTNCAACGAANGNNNACNTATNNGTANNTATGTACTGATCGAAGCCAGTTCAGAATTTAGGAATNNATGTNNTCTAGTCCATTNCATTTATTAAGCAGAGTTCATCNTGGTCCTGTGNGGGAAGCTTAGNGTTGTCATNGNATGGNTCANAANNGNAATNTCCTTTCATCAATGACATGTGNTATAGGCGATTCTGATGGTGGATTTTGTTGGGGCTTCTTTTTCATTAACTCCAGCTTCAATATAAGCATNTGTTGCATG…
Gma.2994.1.S1_at	BE820625	At1g63000	1e-147	Unclassified - Hypothetical Protein Supported by cDNA			TTGCGAGTGAGGATGCCTATCTCATCCGATTTATTGAACCCGCGCAATTTTATCACTAAGATCACTCGATATGAGAAGGTTGTGGATA
Gma.5898.1.S1_at	AW348390	At1g63000	1e-143	Unclassified - Hypothetical Protein Supported by cDNA			GTCGGATTTGTCGAACCCGCGGAATTTCATCACTAAGATCACTCGATACGACAAGGTTGTCGACATTCCCAACTCCATGACCATATTGGACGAGCTTCTCCCAATCTCGCTGGAGATGGCCAAGCGGAACCTCACTGGGATCTGGAATTTCACCAACCCTGGAGTCGTAAGTCACAACGAGATTTTACAGATGTACAAGGAATACGTGGATCCGAACTTTACATGGAAGAACTTCACTCTGGAGGAGCAGGCTAAGGTGATTGTTGCCCCTAGAAGCAACAACGAGCTTGACGCCTCTAAGTTGAAGAATGAGTTTCCTCAACTTTTGTCCATCAAAGACTCCCTCGTTAAGTATGTATTCCAGCCAAATCAGAAAAAGGCATAACATAACTTGGACAT…
GmaAffx.92727.1.S1_x_at	CF808452	At1g67785	2e-11	Unclassified - Hypothetical Protein Supported by cDNA			AAAGAAAGATGGTGAAAGTGGCGACGTACTTCGCGATGACGCTAGGAGCCTTCGTGTTCTGGCAGTCCATGGACAAGCTCC
Gma.7874.1.S1_s_at	BI893945	At1g68310	4e-54	Unclassified - Hypothetical Protein Supported by cDNA			GTTATAGGTCTATGCTTACGTGTCAAGCTCATGAGAAGCTTNNNNNNACGATACAAGGTGGATATCAGAGTGGCACNTGNATCTCATGCANCCGAANCTGCAGTTAACAAACAATTAAACGATAAAGAACGTGTGGCAGCTGCACTGGAAAACTCAAACCTTCTGAATATGGTTGATGATTGCCTTGCTCCATCTTATGATTGAAGGAACTTTTTTCCTCCTCCAAATGCAATGAACTATGTAGGTGCTTTTATGCCTGTCGTAGAAGTTGGTCAGCTTTATCTGTGTTTATGATATTTTTGGTTGCTGGCATATTGGTC
Gma.17989.2.S1_s_at	BM953789	At1g68440	5e-13	Unclassified - Hypothetical Protein Supported by cDNA			ATCAACGATCTCCAAGTGGGTCTGAACTCTCTGCAGAACCCATCTTTCCCTTCTCAGATCACAACCTCCCTCGCTTACAATTTCTGCAAATGGGGCGCAGTCATTCTCGCCCTTGTCGCCACCTTCGGCAGCATAATCAACAGAGTCACCATCTTCATCATCCACTTCCGCGCCAAAGCCCCTTCTCTCCCATCCCTAAACCTTAACGACGACGATTTTTACACCTCCTCTGACGACGAAGACGACTTCCAAAACGACGAGGACGACGACCTAACCTACTCCTCTTCCGAGCCCGAAGACGAGCCCTCCGCGTCTTCCAGCTTCATCCGTTTGGAAGACTATTTCCGAATCAGAGGAACCGATAACCTAGACGACGAGTTTCAGACTCAAAACGGCACG…
GmaAffx.80776.2.S1_s_at	BE607638	At1g70160	1e-59	Unclassified - Hypothetical Protein Supported by cDNA			GATGAATTACTCACCATTCCAGAACAAGATGAATGGGTATACAGTGATGGAAAGTCGACAACTTGTGTTGCCTTTATCCTTTCTATGTATAAAGAGGCTGAAGTTTTTGGTCCCATTGCTAATTCCATTCAAGTAACCGAGTTCACCATTCGCGATGCATACATGCTCAGAATTTTCGAGGACAACCAAACACGCCTACCAAGTTGGTGCAACAATGAGAATGACCGGATTCCATTCTGTCAGATTCTTGGTGAATACAAGATGGAACTGCCTGGCTATAACACCTTGGAGCCATATGCCAACATGAATGAGTATTGCCCTTCTCTTCCTCCAACTTATGATAGGCCTTCTCGATGTTAGATCCAT
Gma.1255.1.S1_at	BU549822	At1g02816	2e-41	Unclassified - Hypothetical Protein Supported by cDNA			CTCCCTTTCCTCTGTGTAGAAATCAAGTTCAATTAAACTCTCCTTTATTTAATTATGATTATTATCTGTGGACGCTTGTGCTCTATGATATCTCTTGTTAGATGTTGATTTTATTAGTACTAATATATATTATTATCGTATGACATATTANANTTATTGTTGCCGCCTGAAAGCAGCACGATTGATTTTCGATTTTCCTCATGATGGAAGAAAATAGTAATTTATAGGTATTAGATAATTTATAAGAACTTGTGTAAGTGCATTATTCCGATCCTGGACTCACCAGACAAAATAAATAAATGCGATAGGGCGATATTGGTGCTTAGTTTCTCGTTCTCTCTGGTCCATTTGGTTCAAATTAGTGCAAAAGATGGTTTGGGATTAGCCAGAATAGAAATG…
GmaAffx.7342.1.S1_at	AW507595	At1g03250	2e-83	Unclassified - Hypothetical Protein Supported by cDNA			TAGAACAAGAGATGCGCTTCGCCGTAGTTGTCTTTCTGAGCTCATTGAGGGTTATGAGGAATGTGTACGAGCTTTCATAACAGAAAGCACAGATGGAGATATTCTTGAACTACAAATTCAGGATCCTTTTCATAGATTGTTACTGCATGGAGTTTGTGAGTTCTACAATCTGGCGTCGGATACAGTGTCAGGTTATAATGGCGTGGAGTCGTCAAGGATTACAAAGATAAAGAGGAAGAAAAAGGGTTCTCCTGTGCTCCCAAATATCACCCTGTCCCATTTTCTGAAGATGTCCAAGGAAGGAAGTTGGTAGTTTCTTCAGGCAGTGTTGTTCATACAATAAAACTGAACCTTAGTGTTGTCCCAGGGTGAACAATGTGCAATATTTCGTATTTATTC…
GmaAffx.44856.1.A1_at	BE824220	At1g05970	2e-07	Unclassified - Hypothetical Protein Supported by cDNA			GATAGAGGGCATTATGGCTGACAAAACTGCTCATCGTTTGGCACGAAAGTATAATCTACATGTTGCAGATGATTGGGCTCGTTTGGATTAACAACTTATGTAAATAGCTTTTTAGTTTTCCTTGCTAGGATTTAAGGTTTGTTGCTTCTTTCTACTCCCACTACTACTACTAAAGAAGCTCAGATCATACATGTTATATGATATGCTCTTTGATCCATGCCCAAGATCACCTTTTGTTTCG
Gma.16290.1.S1_at	CD405423	At1g13360	8e-35	Unclassified - Hypothetical Protein Supported by cDNA			TCGTGGCGGCACGAGACCTTGCCAACACAATAGAAGATTTAATGAAAACAAAAGGAAAAAAAGGGTTTTAGAGATGTAAATATTTTCTTCTCTCTCAGCTTTTTNTTTTTTNTTTTTTNNTNCCCTTCTCTTGATGAAGGGAATTACAGAAGAAAGATTATAAAGCAGGACATAGGATAACA
Gma.1078.1.A1_at	AI442774	At1g17270	9e-26	Unclassified - Hypothetical Protein Supported by cDNA			ATATGTGCCATGTCTAGTGTGTTCATTGGAGCCCCTGGTTCCACTTTCACTGAAGACATCCTGCGGTTGAGAAAGGACTGGGGATCAGCATCCATGTGTGATGAGTATCTTTGCCAAGGTGAGGAGCCAAACATTGTAGCGGAAAATGAATGACANCAAAAAACGGTTTTCTCGAGCCCATGACTCTGGACCAGCACACGTATTTTCTTGTGCCATGATT
GmaAffx.93304.1.S1_s_at	CF809029	At1g17455	1e-26	Unclassified - Hypothetical Protein Supported by cDNA			TGCCTGATAATCTGAGTAGAAATGTGGGTTTGATTAGAGAGCTCAATAGCAATATCAGAAGGGTGGTTGATCTCTATGCTGATCT
Gma.3346.1.S1_at	CD412200	At1g19130	3e-31	Unclassified - Hypothetical Protein Supported by cDNA			ATCTATTTTCTCGTTCCTTCTGGGAGTGTGTCTCGCCTCCATCGCATACCCTGCGCCGAAACCTGGCATCATTACATCGGCGACCCTCTCACCGTAGTGGAATTGAATGAGAAAGATGGGAGCGTAAAATTCACTTGCCTTGGATCAGATCTGACTCAGAATCAGGTGCCGCAGTACACGGTGCCTCCCAACGTCTGGTTTGGCTCTTTTCCTACCAAGGACTTTACCTACTCTGCGGACGGGGTATTCGGAAGTGCTGAAGCTGAAGCTGAAGCTGAAGCTAGAGATAGTGAGAGGAACTACACTCTTGTAGGATGCACTTGTGCCCCTGCGTTTCAGTACCAGGACTTCGAGCTCGCTAAGCCTTCTTATCTCCTCGCTCGTTTTCCCCAATTCCAC…
Gma.17908.1.S1_s_at	CD393355	At1g27350	1e-20	Unclassified - Hypothetical Protein Supported by cDNA			AGGGCCCTGCCGGAAGAAGATAAATACCGTCTTTCATTTTCCGGCGATCTCTTTTTTCTTCCATCACCGTTTTCCGGCTATCCCTAATCCTTAACAGAAATGACGACATCAAGGCGCCTTGCGGACAGGAAGGTGGAGAAGTTTGAGAAAAACATCACCAAAAGAGGATTTGTGCCAGACACAACCACTAAAAAGGGGAAAGACTACCCTGTTGGCCCAGTGCTGCTCGGTTTCTTCGTCTTTGTTGTCATTGGATCATCTCTCTTCCAGATAATCAGGACAGCAACGAGTGGAGGCATGGCTTAAATGGAGCTTTATTTTGGATTGTGTCATCATCTCTTAGCCTCCTCGTAGAAAATGCTAATACTTCTCTACATGTACTGTACTTGTACTAGACCC…
Gma.12411.1.S1_at	BI969225	At1g63980	2e-27	Unclassified - Hypothetical Protein Supported by cDNA			CAGGTGCCTGGAGAATCATTGAAACTGAAACAGCTCAAAGTTCTTATTGATGAACATTCATCTTCAATTTTGTCTGATTTTTCTTCAAGAAGAGAGTCTGTTGCTTACTTGAAGCAAAAGCTGACAGGTAGTAGGAAGTTTTATATCGAAGGGAAAAGAGTGCGATTGGCATCAAAGAGAAGCTGAAATTTTGATACTTCTTTTTCTTGGCCTCTTCTAATTCATTATATTTTAGGAGAGAAAGGGGGCAGTTTGGAATTTAGTCTAAGGTAAATTTGCATTGGTTAGCTTTATCAACGTATGTTGTAGTATTAAATAGCATTTTATGAAATTTAATAATTTTTTCTTTTAAGTTTAAATTTTAAAAGTGCATGTGTATCCTGGATTGAATATTGANAT…
Gma.15485.1.S1_at	AI443804		1e-05	Unclassified - Hypothetical Protein Supported by cDNA			AAACTCATGAGGCTGCTACTGCTGCTGATGTTCTTTCTGTGTTTCTCATATGTTCTCTCTGTCTCTGCTATTCCTGCAACAAGAACCCAAAATTTGAAAGGCGAAGAAGAAGAATTTTCAGCCCTGCCTTCTTTAACTAGGTTGGATCATGTGGTTGGAAATGGTGAGGTGGTGCTCGTTGACATGAATGAAGGATTCATGGAGAGGAGGGTCGATTTGGAAACCCAAGACTATGAAGGGACTGGTGCAAATAAAGATCATGATCCAAAATCCCCAGGAGGGGCTTAATTAACCTTAATCCCAAAAACGACAAAGTGTTTTAAGTTAGTTGCACCCGAAAATGTAATAGAGGATCTATATGTATCTATTTTTATATATTTGGTCTTCTCTTGTAAAATC…
Gma.3256.1.S1_at	CD418225	At1g23750	2e-55	Unclassified - Hypothetical Protein Supported by cDNA			GAGAATAAAACAAATCCAGCGAAGAAATCTTNTNTTTTTTGTCNGAGACATNTNATCATGCCCATCACATTCACCTTAGTTTAGGAATAGAGATTTGAGNAGCNAGTAGNTNCCAACAGTTGCTTCTNACTNTTGCAACNGACTCTGGATCTTGTAGCTTAACCNCTGAACAGATGGTCGCTGTAATTGCAACAAGAAAATGGGAATTGGCTTCCAGATCATNNGCTTTTTGTTNTGCTATCTATTGACAATTTTAGATTATGTGTATCNGAATTTTATATANGGCAGGTGANTGTTTATATTTGATGTAATCCTTTGTTTAGTCTCATGTTTGTC
GmaAffx.90445.1.S1_s_at	CF806170	At3g23570	3e-56	Unclassified - Hypothetical Protein Supported by cDNA			TTCCTCCAAAGCTTGCAGAACAATTTAGACAAGCCCTAAAGGCTAAACCTCAGATTGATAGTTATGTAAAAATATTTCCTAACGTCTCACACGGTTGGACAGTGAGGTACGACCCTAAAGATCCAAAAGCTGTAGAGGCTGCAGATAAGGCTCATCAAATCATGATAGGTTGGTTTCATAAACATTTAAAGTGAGAAATCTTATGTGATGTTTGATCCACCAGTGAAGTCTCACTTAAATAAAACAACGGTGGATCACAGTGGGTGGCCGGCAATAAATGCTTTCACTAATTGAAGGCAGATTGTGCTCCTTTGATCTCGAAACTGTA
GmaAffx.90541.1.S1_s_at	CF806266	At5g22060	4e-52	Unclassified - Hypothetical Protein Supported by cDNA			TTAAAAACTAGCTAAATTCCTCTCTCTCTCTCTTTCTCTTCGAGGGTTTGGGTTTCTCTTCCTCCCTTGGAGAAAAAGAAGAGCCACCGCTGCGACGCCGTTCGTGCATTTTTGAGGTGCCGCTG
Gma.5750.1.S1_a_at	BE823667	At4g17890	1e-144	Unclassified - Hypothetical Protein Supported by cDNA			GATCTTTTTGGTGACTCAAGAGACAACAACATCGATCTTACTGCTGGTGACCTCATCAATCGATTATCTTTCCAGGCACAACAGGATCTCTCTTCCCTTAAGAACATTGCAGGAGAGACTGGAAAGAAGCTCAGCTCACTGGCCTCCACATTGATGACAGATCTTCAGGACCGAATC
GmaAffx.90652.1.S1_at	CF806377	At5g13800	4e-29	Unclassified - Hypothetical Protein Supported by cDNA			CATAAATTTCTTACTTCGCGGGTGGATCAGAAACCTAGAGTCTCAGGGTTCTGTGTCATTACCATTGCTTGAAGATCTAGACAGTATGAAGCACTCTATTATTGACAGGGAATTAGAATTTCCCAGAGAAGGTTCAAAAAAGTCAGTGATGGTCAGATATTTCGCTTCCAATTTCTCACTTTGGGACAGGATAAGATCTTTCATCAGATCTCAATCCAAGTTCAGTAATATTCTGGCAGCCAAACCTCAATGACAGGGTGAATCATATGGCATCTTCAAATATAAATCAACTTTGTATACTGTCTTCTCTTTCATAG
Gma.1487.1.A1_at	CD397045	At2g34460	1e-100	Unclassified - Hypothetical Protein Supported by cDNA			GGGACAGTTACTGAATCCAGCTTACATCTTTCTTAATGTTTTTGGACTCACCTTGGTAGCGAAACTACAGGCAGAGAAATATATCAGGAAATCTGGTATAAACTATACAATAATAAGACCAGGCGGGTTGAGAAATGATCCTCCTACTGGAAATGTTGTTATGGAGCCAGAGGACACCCTTTATGAAGGTTCCATATCCAGAGATCTAGTTGCTGAAGTGGCTGTGGAGGCATTGGCTTATCCTGAGGCATTTTATAAAGTTGTGGAAATAGTGTCTCGCCCTGATGCTCCTAAACGCCCATACCATGACCTTTTTGGTTCCATAAGGCAACAATGATGCCTGAGATTTGGACTTGATTGCAGATTAGCAAATGTTGATTTGCTTTATGGTGGCAAATT…
Gma.15653.1.S1_at	BI969594	At3g11210	1e-90	Unclassified - Hypothetical Protein Supported by cDNA			GAACTAATCCGCAAAAAGCTCAGTGCAACGCAATCAGGAAGAACCAATGAATCCTGTGGAGAGTATGCAGATGGGTTAATGGAGCTTTGTGAGGAGATGAATATCAAGGCCATTAATCTGTGGTCTGCAATTCAGACAAGAGAGGATTGGTTAGACGTTAGCTTCACGGATGGAGTTCATCTATCAGCAGAGGGAAGCAAGGTAGTGGTGAAGGAAATATTAAAGGTTCTAAGAGAAGTAGATTGGAAACCTAGTCTGCATTGGATGTCA
Gma.6518.1.S1_at	BQ627558	At3g11210	3e-84	Unclassified - Hypothetical Protein Supported by cDNA			GATGCAACAATTACCCCAAACAGTGATNGGANGCCATCAAGGACAAATGAAGCTTGTCGAATATATTCAGAGGCATGTTTGGATGTGTGCCGTGAGATGAATATCAAGGCCATTGATCTGTGGTCTGCTATTAAGAAAAGAGATAATTGGCAAGATGTCTGCTTCATTGATGGAATTCACTTGTCATCCGAGGGAAGCAAGATAGTGTTGAAAGAGATACTGAAGGTCCTCAAAGATGCAGAATGGGAACCAAGTCTATATTGGAAATCAATGCCAAGTGAGTTTGATGAAGATTCACCATATGATCCAATTGCACCTGATGGAAAGTCAACTATTAATATTTCCAACTGGGCCTTCCCTGNCAATGACAAATGGGAGTAGACTACTTTATTATGTGCA…
Gma.5294.1.S1_at	BE658252	At5g59845	2e-20	Unclassified - Hypothetical Protein Supported by cDNA			CTTAATTAGGCTCTATGGATAGTTAATAAAAATG
Gma.5294.1.S1_s_at	BE658252	At5g59845	2e-20	Unclassified - Hypothetical Protein Supported by cDNA			ATCCACACATCAACTTCAAGCCTTTGATTCAGTCACTACCGTGCATGTATATCTCCACCTTAGAGATATTCCACCATGGACCCTTGCTAGCTGATTATGTTTACTACCTTTATTGTTGTGTTTGTGTATTACATAAAGAGAAAAATTTGGTCACTTTAGTTGGATCGGATATGCATGATACATGAGAGTGAGAATAAATCGGGGTCTTCTTTGTCCTCGTGTGAATTTGGTCTGTCTTAATTAGGCTCTA
Gma.579.1.S1_at	BQ298402	At2g33470	5e-86	Unclassified - Hypothetical Protein Supported by cDNA			GGATTTCTTAGTGGCATTATTCCAAAACTTAATTGAGCATGCAGATTGGTCAATGTCACAAGCCTGTACAGATTCCTATAACAAGACTCTAAAGAAGTGGCATGGCTGGCTTGCAAGTTCAAGCTTCANTGTAGCNATGAAGCTTGCTCCTGATAGGAANAAATTCATGGAGGTGATACAAGGCACTGGTGATATCAGTGCTGATATACAGAAATTTTGTACTGACTTTTCTCCTATCTTTGAAGAGAATCACAAGTTTCTGGCTCGTTGTGGNTTGGATGATATGAAGGCGTCATGAAGTCACGGNTTCATGATCAGAAGTCTCTTGATGAATGNCTCTTGCATTCTTACTCTCATGTTGAGTNCTNAAACTNTATGTTTCTTTGTNGGCATCCAGAC…
GmaAffx.43343.2.S1_at	BI945998		2e-16	Unclassified - Hypothetical Protein Supported by cDNA			GAAAGCAAAAGCGATTCCCGTAGTAGCGGCGAGCGAAATGGGAGCAGCCTAAACCGTGAAAACGGGGTTGTGGGAGAGCTATACAAGTGTCGTGCTGCTAGGCGAAGCAGCAGAGAATGCTGCACCCTAGATGGCGAGAGTCCAGTAGCCGAAAGCATCACTAGCTTACGCTCTGACCCGAGTAGCATGGGGCACGTGGAATCCCGTGTGAATCAGCAAGGACCACCTTGCAAGGCTAAATACTCCTGGGTGACCGATAGTGAAGTAGNNNNGNNNNNNNAGGATCATATCAAGATTCATGGTTTCTGAGCGGTTGGAGTCTTAAGTGTCAAATTTTACCTGCCTGACTATGTGTTAGGCATAATATATAATCTGAGTCGTGTGGATGTGAT
Gma.2661.1.S1_at	AW568722	At5g18250	4e-33	Unclassified - Hypothetical Protein Supported by cDNA			TTCGCCTCTCATTAGGGATAGCTTCTCCATGATTGGTTCTGCCGTTGGCGGCGTNGCAAGTGCATTTTATGGATTCAATCTTGTTATGCCNATTGTCCAAAGAAGGATCAAAGGACCCATGTGGTTGCATTTTCTCATNGGNGCACCACCTGTGATAGTATTNTCTTCAGCCTGTGCNGGACTGGCGGGTGGGGCTGTTCCTGCTGCAGCACAACTTGTTTCCTCNTCTTATCATGCAGCTTACTCTTCTCCTACCTCACCTCCGCCATCAAAGGATGAAAATATTCAAAGGTCGAGAAAATGATATAATGGACTTNTGNNTCTGACCATNCATTCATGATGGGTGTGCTGAGAGTTTTGTTTTTCTTGTGTAAATACTNCTCTNGAGATTGGTATGTT…
Gma.17717.2.S1_a_at	AI973919	At5g20090	5e-49	Unclassified - Hypothetical Protein Supported by cDNA			TTCAGAGCATTCTGGAACAGTCCAGTTGGTCCCAAAACAACTCACTTTTGGGGACCTATTGCCAACTGGGGATTTGTAGCAGCTGGATTGGCTGACCTGAACAAACCTCCAGAAATGATCTCTGGCAACATGACAGGAGCAATGTGTGTCTATTCAGCATTGTTCATGAGATTTGCATGGATGGTTCAGCCACGCAACTATCTACTTTTTGCTTGCCATGCCTCAAATGAGACTGTTCAACTCTATCATTTTTCCCGATGGGCAAAGGCACAGGGGCTTCTGTCGGAAAAGAAGGAGGAAGCTTCATCCCAGTGATTTG
GmaAffx.6537.1.S1_s_at	BQ081300	At5g23040	3e-09	Unclassified - Hypothetical Protein Supported by cDNA			ACACTTGAACTCTTAACGTCATTGGTAGTTTATTTGTTCTTGTTCGTTGCTTGTACTTTTCTTAAGTGAAGTGGAAACTATTCTTTCAACGTTATAGTCGGTGATGAGTTTATAGGTGATCAAACAATTTTTTT
Gma.6183.1.S1_s_at	BM527940	At5g11500	3e-57	Unclassified - Hypothetical Protein Supported by cDNA			TGGTGTTCTACTTCAAAGCGCGCCCTGAAGCCGGCGATTTCACCATCTTCATGGGCCTCNACNAAGTNCGAGAACNAGGANCTCATCAAATACGGTTTTCCCGAAGACATCTGGTTCCATGTTGATAAAATGTCTTCAGCCCATGTCTATGTCAGGCTGCACAAAGGCCAGACTCTCGATGACCTGAGTGAGGCTTTACTGGAAGATTGTGCTCAGCTTGTCAAAGCAAATTCAATTCAAGGAAATAAAGTGAACAATGTTGATGTTGTTTACACTCCCTGGTCTAATTTAAAGAAAACTGCTTCAATGGATGTTGG
Gma.14258.1.S1_s_at	CD418598	At5g11970	8e-21	Unclassified - Hypothetical Protein Supported by cDNA			GATCAAGGTCTTATGCAAATGGGCAAATGATGCAGATAGAGAGCTACTATGGAGCTCCTAGGCCTTATGATCTTAGTCTCAGAACTTATAGTGCTTCTTATGCACAAACTCAAATAGGTCCTCCTAGGGACTTGAAGTTGAAGAAAGGAAAAAGCATTTCTGCAGGGTCTTCTTTCTCCAAGTCTTGGAGCTTTGCTGATCCTGAGCTTCAGAGGAAGAAGAGGGTTGCTAGCTATAAAATGTATTCTGTGGAAGGAAAGATCAAAGGGTCCTTCAGGAAGAGCTTCAGGTGGCTGAAGAACAAGTACTCCCATGTGGTTTATGGTTGGTAGTGGTTTAATTAATTGCTGCTCGTATTTAAATTTCTGGTT
Gma.1585.1.S1_at	BQ628922	At5g13030	0	Unclassified - Hypothetical Protein Supported by cDNA			GGTCTCTACCAGTGGGATACCTGATGACGAAAGGAAGATCTCGATGGATTCAGTGAATCCTAAATATATACTGAGGAACTATCTCTGCCAGACTGCAATTGATGCTGCAGAAATAGGTGATTTTGGAGAGGTTCGCAGCCTGCTCAAATTAGTGGAGCATCCGTATGATGAGCAACCAGGAATGGAAAAATATGCTCGCTTGCCCCCAGCTTGGGCATATCGACCAGGTGTATGCATGCTTTCTTGTTCTTCATGAGGCTCCCATTTAGGTCTAAAGGATTACAAAAATGAAAACATAAAAACTAGGAATTAATTAAGAGCAAAAAAATAGTAGCGTGTTTCTTTGTTTATTATTTTTCCATATGTTTCCAATATACTGTCCCCGAGTATTATTTAACA…
Gma.17745.1.S1_at	AI856393	At5g13100	1e-134	Unclassified - Hypothetical Protein Supported by cDNA			GAATTACTGAACCTCCATTTTTCCTTTTCATGAAAGGAACAGGTTGGTGCGGTGCTGGAGCTGACCACTATGAGCCCCTCATTGCTCATCCTTCCGCCTTTGTTTCCCAAGAAAAGGTTGCTGTGGTACTGTGAGGTTTCGCGGCCTGCAATTTTGTGGAGTAGAGATCGAGTAGAATTAGAATTTTCTTCACCCTATTTTATGGGCCACTCTCAACTGTTTGGCCTCCTGCATTATGGTTCTTCTCCGTCCCAAGGGAGAAACCACCACCTAATCGGGTAGCCATTTGTTTTGTTACTGACATTTAGAATCAATCATCTTTGACTCTCTTGACATTGGACAAGCAGGTTTGCCATTGCCGTTGCCTGCTGTTTGAGCAACCCTAGAGTATTATTGTAT…
Gma.4178.1.S1_s_at	BQ299028	At5g13190	1e-51	Unclassified - Hypothetical Protein Supported by cDNA			TTGGAGATCCAAAGGGCATCCCCATCCAGCAAACCATTTACAGGGACACTCCTGCTCCTTTCAACTGCCCTTACTGCGCTCATACCGCTCTCACTACCGTCAGATCAAAGCCCAGTCTGGCAGCATTTGTTGGATGCTTGATGCCAATGATGCTTGGAGTTTGCTTTCTTTGCCCTTCAATGGATTGCCTTTGGCATAAATATCACTACTGTCCTAAATGTCAAGAAAAGGTTGCTGATTTTGAGAAATCAGATCCCTGTGTTGTGATGGATCCACCACACTGGACTCAGGAGAGCTTTGCATTGTCTGGATAGGATG
Gma.10959.2.S1_at	AI938035	At5g01750	2e-72	Unclassified - Hypothetical Protein Supported by cDNA			GAAAGACCATTTCATGGTCACGGTTTATCCCAACATTGATTATGCGTTCATAGTGGCGCTAATCGTGATTCTTGACGAGATTAACGACGATGAGAAGGAAGATTAGAGGAAAGCTATACATTCAGCGAATCTTTTTGTTTGTTTAGGTGTTTCGTCTTTCTAATTTATGAGTGAATAAAAATATTTAAATTCGAGCTGCATTCATTTTTAATTTTTTATGTTTGGTACCATCTTAATTAAGATCCTAGGTTATTCTGTAGTGTGTGAAGATATTCTCACAAATTTTGATTTTTTTTTTTAACCGCCTAATTAATTTTCGATCAG
Gma.7742.1.S1_at	AW309947	At5g03345	2e-32	Unclassified - Hypothetical Protein Supported by cDNA			TCAGGGCCTCCTTTGAATGTGGTGATTGAGGTGACTCTAGGGTTAGTTTTTTGCATGTGGGCTGCACTAACCGTGCCAGGAAAGTTTTTGTCAATCCACCCTCACTCTGAAGAGAACAGAATTGTTTCTTTACCTTCCAACGTGGACTTCATGATCTTCAACCATCGATACAAAGTCTTTCCTGTGGAAATGGATGTGAAGCTGAAGCATTGAGAACTTTTATATAATTGGACCGAGTAACTTCATTTCTTACACGAGGAAGAAAGAGTCTTTCCTCGAAAATTGAATAATCTCTTAGTGCATTTGATTTTGATGTTAGTACTGGTTGATGTACGAGATTTTGGAGATTTCTTTTGTAGCTTCATACCTTACATTTCTGTACTGGGCACCTACCCGTCT…
Gma.2758.1.S1_at	BQ453089	At4g28190	1e-103	Unclassified - Hypothetical Protein Supported by cDNA			GTCAAAAGCTGCAAATGGCTCCCATAGATCCCANAATGGNCGGGCTTGTCACCGTGATGAGTTTGTTCGCTGCACTAGTTGCAATAAAGAGCGTAGGTTTCGTCTGAGGACTAAAGAGGAATGCCGCATTCACCATGATGCTTTGGCAGATGCAAATTGGAAATGTTCTGATCTTCCATATGACAAAATTACNTGTGATGATGAAGAAGAAAGAGCAAGCCGTAGAGTTTACAGGGGATGCACTCGTTCTCCAACATGCAAAGGTTGCACTTCTTGTGTGTGCTTTGGCTGTGATATCTGCCGCTTTTCAGATTGCAGCTGCCAGACTTGTGCTGACTTTACAAACAATGCCAAAGCTTGANTCCNTTCATATCATATTCTCTGCNATTTTCTCACTTC…
Gma.10317.1.S1_at	BG650489	At4g29870	1e-40	Unclassified - Hypothetical Protein Supported by cDNA			TACTTCATGGTCGTCTCCGGCATTGTTTACGACATCATCGTCGAGCCCCCCGGCATCGGCTCCACTCAGGACCCCTACACCGGCGCCGTCCGCCCCGTCGTCTTCATGTCCGGCCGCGTCAACGGCCAGTACATCATCGAGGGCCTCTCCTCCGGATTCATGTTCGTCCTCGGTGGCATCGGCATCATTCTCCTCGACCTCGCCCTCGATCGCAACCGCGCGAAATCCGTCAAGGTTTCCTACGCCTCCGCCGGCGTTTCCTCCGTCGTGCTAGCTTACGTCATGAGCATGCTCTTCATCCGCATCAAGATCCCCGCTTATCTTAGATGAATAATGGATCCACGAGATTCCTGAGTTTTAATTAATTTGTAGTTTGACTGAGGTTTTCGTTT
Gma.3140.1.S1_at	BE820684	At4g30200	7e-34	Unclassified - Hypothetical Protein Supported by cDNA			CCCCAAGATGGAAGCACATCCAAGAAGAGAAGTGGAGAAAGGCAAGAGGAGGGCCGTGTNNNNNANGGCTTTTCGGATCGNGATTTTGAGTATTATGTGAAGGTNATTAGGTGGTTAGAGTGTGAAGGNCACATAGAAAAGAACTTCAGGCAGAAATTTCTGACTTGGTACAGCTTAAGAGCCACNNCTCAAGAAGTNAGGATTGTGAAAATATACATTGATACATTTCTTGAAGATCCNGCATCTCTTGCAGAGCAACTTGTGGACACCTTNTCNGAATGTNTNTCCAGCAAGAGAACATCAGTNGTGCCAGCGGGGTTCTGCATGAAGCTTTGGCATTGACCAGATTTTGTAGGTCCAGCTACTAGCC
Gma.3916.1.S1_a_at	BI941697	At4g31130	2e-67	Unclassified - Hypothetical Protein Supported by cDNA			AAGCACACCACTTTCACAGTGTTCTTCAACATTTCTTTGTTCACCACTGGATTAGCTGCAGCTATGCTGTTATGGCCAACAATCACCGAACACATTCACCTGACACGCAATGTGCACCGCAATATCAACTATGAATGTCCTACAGCTAAAACTGGTCTACTTGGAGGTGGTGCCTTTCTATCACTTGATTCATCTCTCCTTTGGTTGATTGCCCTTATGCTAGCTGACAATGCTCGCGAGGACTTCTTTGAAGAAGAAGGAGAAGATGGTGACAAGGGTGAATTTGGCACAGCCTCCTCTGATGCTTATTATGAT
Gma.7636.1.S1_at	AW351204	At5g41950	1e-107	Unclassified - Hypothetical Protein Supported by cDNA			AAAAGCTTCAGCAGATACCCAGAGGAGAANATAAACAAGTACCACCTCAAAATCTCTCAGGCAGATNNNTAGATGCAGTGAGTGGNGATAAGAAGACTATCAAAGTAGATATAGCAGATATTANTTCTGTATCAGCATGTGCTGATCTTACCTTACCACCTGGTGCAGGCCTCTGCATAGATACAAGTTATGGATCAGTTTACTTGGTTGCTGACTCTTGGGAATCATTGGATGGCTGGCTGGATGCANTTCGTCTAGTTTACACAATTTATGTGCGAGGCAAAAGTGATGTACTGGCTGGTATAATAACAGGATGAATATAANTTTTAATTGTANCNACCAATTTGATNTGNNATGCCANTTTTTGTAAGAACTCATTATCCAGTGTTTTTCACTTCG…
GmaAffx.50646.1.A1_at	AW310451	At5g51920	2e-06	Unclassified - Hypothetical Protein Supported by cDNA			AAAGGATCGGCTACATCTTCTTGCGCTCCACCGCCCGGATTTTGTGATATGTAATCTTGAAAACACTCATTCCAATCCTTCAAGAGTCACTTGCCTCTTAGTGAGAAAGAAATCCTTTGAGGTCTCAGCTACTTCATCTCAGGCAGTTGAATGAGTGAGAAAGAAATCCTTATGATTTTAGAGCAATTAGCAAATGTACAAAATTTCCATGCAGATCCTTAGGTGTTTTTTCTCCTATCAGAATTGGAATTTCACCTAGGTAACTTGTGTCAATCTTTAATGTAAACTTTTATTATGTGAACTACTGAGGCGAACCGCCAATTCTGATTGG
Gma.2845.1.S1_at	BI426775	At5g53620	2e-37	Unclassified - Hypothetical Protein Supported by cDNA			CTGTACAATTACCTGTTGGCAATGGNGGAAGCATTGACANATCAAGTATGAGCAGTGCCCAAATNTCAGGCTCAGCAAATGGNAGGCTAGTCTCAAGCTTTGCTTCTAAACAGCAGACCAGGGCAACTGGTGCTGTGTACCCTTCTCNAAGATAGGAAGATGGAAGGGCGTGTTAGATTATCCTGTCTCACCAGGATGCGGATGAAAACATACAAGATTATTTATCGGGTTTGTGGGAGAATGTTTTTTGAAGCATTGACGGAGTAATCTTGTGCCCTGGGCAAAATNTGATTTTAAGTTGCCGGTGCTATCTCCANCTNNNNNTTCTGTAGTANTTTATTTCTCCCAGCTGTTACAATTCNGTGTGCTTTCATTAATGTGGGCCTC
Gma.1320.2.S1_s_at	BM523412	At5g24890	5e-08	Unclassified - Hypothetical Protein Supported by cDNA			GGTTCCGATGATCGGATCTTTCTTAACGTGTCACCCGAAGAAGGTGATGGGTCGAACTTTCGTATTTCGGGCCCACCCAAGTTCTTCGCCGGCGGCGAGTCGGAGAGTTCGTCGTCGATCGGAACCCCTGATGACAGCGACAACGAGGAGGAGGAAGAAGTGCAGAGCCAGTTAAAGATACGAACTGGGTTGGGTTCTTTGGATGCTTTGGAAGAATCTCTTCCCATCA
GmaAffx.91897.1.S1_at	CF807622	At5g49610	2e-57	Unclassified - Hypothetical Protein Supported by cDNA			AATGTTGTTCTAGCGGGATACCATCGCATGTTTGGTCATAGGCCAGATGGAAGTTTCATATGTTTGGTGTTTGATTCGGAGTTGAACAAGTGGAGGAAGTTCGTTTCGTTCCAAGATGACCATTTTACTCACATGAATAAGAACCAGGTTGTTTTTGTCAATAATGCTCTGCACTGGTTGACTGCTAGCTCTACTTATATACTTGTGCTTGATTTAAGTTGTGAGGTTTGGAGGAAGATGCAATTACCGTATGACTTGATTTGTGGAACGGGAAATAGGATTTATCTCTTGGACTTCGATGGCTGCTTGTCTGTTATTAAAATTTCAGAAGCATGGATGAATATATGGGTGCTAAAAGATTACTGGAA
Gma.9632.1.S1_s_at	CD405173	At2g06520	2e-20	Unclassified - Hypothetical Protein Supported by cDNA			GGACTCACAGCAGCTTCTGTGACAGCATCTATGGTGGTTCCGGAGGTGGCTCATGCTGCTGGATATGAGTTCTCCCCTTCCCT
GmaAffx.30993.1.S1_at	BE659155	At2g29530	2e-30	Unclassified - Hypothetical Protein Supported by cDNA			TCGATATCGGGTGCCGCTATTTGCTTCTCCTCTGAACCATCCAACCATTCAACGGCCCTGTGTTTGTTAATTGAGATTTGAGATTCAACGCTCTAACATTGGTACAATGGCTNCCAACATCTCGCCTTCTGCCCTTGATAAAGAACAGATATTTGGAATGGCTGAAAAGGAGATGGAGTATCGAGTTGAATTATTCAACAAGATGACCCAGACCTGTTTTAAAAAGTGTGTTGACAATAGGTACAAGGAGTCCGAGCTAAATATGGGTGAAAATAGTTGCATTGATCGCTGTGTTTCAAAATACTGGCATGTGACTAATCTAATTGGCCAGCTGCTTGGTTCTGGAAGGCCTCCTATGTAATCCAATACTGTTATGTCTCCTTTCGCGGTTAGCAACAT…
GmaAffx.22313.1.S1_at	BU548419	At3g20970	5e-13	Unclassified - Hypothetical Protein Supported by cDNA			GATGCATTATGTTCCTGAGGTCAAAGGTGTGGAACAAGAATTGGATGCTGAGGATGATGGAGCAGCATTAAGTGGAGAAATTAAATAGNTGANCTTTTTTTTGTTTTTTCTCAAAATTGCTACTTGCATTTAGTCTCTTCATGCATGCATTTTCGCACTCAACAGAGACTTAGAAGTACAACAGCAGTACATGATGGAAACAAAAAAAGGTGTGAGTCTACACAAAAAATATATTGAATAAGTCGTGAGTTGGATACATTATAGTATGGCATGAAATCATCGTTCCATGCTAGTTGGATCTTCCTGACATAGATGAAAGTAATTTATGACACGATGCCATTACAGAGATAGGGTGTACTGTACCTTATTCTTTTCGGCCTGCTTGGCTATGATTCTTGT…
Gma.4166.1.S1_at	AI748072	At1g54320	1e-43	Unclassified - Hypothetical Protein Supported by cDNA			AAAGCGAAAGAAACCTAACACAATGGCGTCTTCGATCGCAGCTGGTGCTGGATCCACCGATCCCACAGCTGCCAGAAGAAACACTAAGCGACCCAAGTATTCAAAGTTTACTCAGCAAGAACTTCCAGCGTGTAAGCCAATTCTCACGCCACGAGCGGTTATTTCGGCATTCTTGCTTGTCAGCATTGTATTCGTTCCTATTGGAGTTGCTTCACTAATTGCTTCAAGGNNNNTTGTTGAAATTGTTTCTAGGTATGAATCAACATGCATACCAGATGGTGTTACTGACAAGGTAGCATACATTCAGAGTCCTGCAGATAAAACATGCCACATATCACTACCTGTGCACAAGCAT
GmaAffx.34491.1.S1_at	BE820865	At1g54320	1e-118	Unclassified - Hypothetical Protein Supported by cDNA			AAGCAGGAGGATCTTATTGTCTGGATGCGTACTGCTGCTTTGCCAACTTTTAGGAAGTTGTATGGAAAGATAGAGGTGGATCTCAATGCAGGTGATCAAATAAATGTAACACTGCAAAATAACTACAACACNTACAGNTTTAATGGCAAGAAAAAGCTTGTTCTATCAACTACTAGCTGGCTTGGTGGGAAGAATGACTTC
Gma.16213.1.S1_at	BE658101	At5g21105	1e-152	Unclassified - Hypothetical Protein Supported by cDNA			ACATGCACCGTTGAGGAACACTGCTGTGATATTTCCATATGGTTGGACTGCTTTGAGGTTTAAGGCTGATAACCCAGGAGTTTGGGCCTTCCATTGTCACATTGAACCCCATTTGCACATGGGAATGGGTGTGATTTTTGCTGAGGGTGTTCACAAAGTTGGAAAAATCCCAAGAGATGCACTAACTTGTGGGCTTACTGGGAATAAGCTAGTAGGAAATAGACACTATTGAAACTAGCTAGCCACATATCAACATCAAAAGAATCTTAAATGGTGTTTATTTAATTTAATATTTGAACGTTGAATTAATATTATGTTTTAATTTTTCATTTTAAAGTTTATATATATATATATANATATATATATAAAGAAANNNNNNNNNNNNAATGGAAATTGGGA…
Gma.6772.1.S1_at	AW349464	At1g23040	7e-06	Unclassified - Hypothetical Protein Supported by cDNA			TAAAGGGCATCATATTAAGGCACCAATTTTGGTCCTCAATTTGTTCCTTGTCCTAATTTGTTCCACAGCTTCTTCCGTCAACGTTGTTGAATCAAGGAAACTTGATGAGACCACTCCAGTGCCTGCCACAAACGGTACTGAAGAAAAGTGTGGATCATGTGGTGGTACCACTTATCCGTCGCCACCGCCACCGTTACTACCACCACCGTCGCCACCACCGCCTTCACCAAAGAAAACACCACCCTCTCAGTATTGTCCGCCACCACCACCGTCATCGTTCATATACATCACGGGGCCGCCGGGGAACTTGTATCCGGTCGACGAGAATTTCAGCGGAGCCACCAGCCATCACCGGAGCTTCGCCGCCGTGTTGATGCCACTTTTGGTTGGCTTGTTTAG…
GmaAffx.92055.1.S1_s_at	CF807780	At2g18910	8e-34	Unclassified - Hypothetical Protein Supported by cDNA			AAATCGGGCCTTACACCGTCTTCATGACGCCGCCGTCTACACCCAAACCCTCCGACGACCACCCCGTCACCACCAAGATCGCACCTCCGCCGCCTCAGATTCCCAAAGCCGTTCCTTCCCCCAAACCCGTCTCCGACCCCGACGATTCCGTCTTCGGCTTCTTCAGAAATGCCGTTACCAAGGTCCAAACCGCACACTCAAGTTTGGATGATCATTTGGCACGTTGGTTTGGGTTGAATCAGTCAAAGTATCAATGGGCTCTTGACGATTATTATGAGAGCAAGGGAATGGAAAAAGGAGACATTAAAGTGAAAGAAATATCGAGCAAAGTACAGAGTGTTTGACTTGCCTAGAGTTGGTGGATTATTCAAAAGTGAGGTGTGAAGACTCCTGCTTTGA…
Gma.11333.2.S1_at	CA938453	At2g01190	1e-22	Unclassified - Hypothetical Protein Supported by cDNA			ACATCAGCAGCAGTATGTCACATACTCACAGATTCACCATCCTTCTCAGTCCATGGCTCCCAATTCTGCTGCCCCTGCCAATTATGCTTTTGATTATGCGGATCCTGCTCATGCTCAAATATACTACTCTCAACCTATGGCACCCACAATNCCTTCACAGTACCAGACTATGANNNNNNNNNNNNNNNTGATGCAGGAAGGTTCAGCTCAGCATCCCTCAGACAGCGTGAAGCANNNGCAGCAGATAAGAACCTCACAACCATTATAANCCANTCCTTAAAAAAAAANNNNNCAATTTTGAAAAAAATGGGTTTGNTTTCCCTTTAAGTTTTTATATGCAGTTCNTNTCGTCATGTTTGATAAANCTGTTTGTGGTATGTNNATTTGGATAGNNAAAAA…
GmaAffx.48531.1.S1_at	AW471529	At1g54390	3e-37	Unclassified - Hypothetical Protein Supported by cDNA			TGATGCCTCCACCAGGAAGTCATAAAAAGGAGTATGCTACCCCGATGGATGTTGATCAACCCATTGATCCAAATGAACCGACATACTGTGTTTGTCATCAGGTATCTTTTGNNNANNNGNNNGCTTGTGACAATGAAAATTGCCAAGGAGGTGAATGGTTCCACTATTCGTGCGTTGGGCTAACGCAAGAGACAAGGTTCAAGGGAAAGTGGTACTGTCCGACTTGCATATTACTCCCACAATGTCAACGATGAATCTTTGCACGAACTAAATTACATTCATAAATGACCACTGTTTCAATAGAATTGTCACTTTTTAGTGAATNNNNNNNNNNNNNNNNNNNNNNTATTTGTCTTCTATATTGCTTGGTCATTTGTGCTTGGCAAA
Gma.5849.1.S1_at	CD402150	At5g48485	5e-15	Unclassified - Hypothetical Protein Supported by cDNA			TGTGGTAATGGCTTCTTCTATGTGGAAAGGGTCCAAAGGTCTTAGTCTCTGTAACATGGATGAAGGTGGATTGGAGGCTTGCAAGCCCTCAGTGACTCAGCCAAACCCAGTTGATCCATCCCCTGATTGCTGCAAGGCTTTGGCTGGTGCTGACTTGAAATGCCTTTGCTCTTACAAGAACTCATCAGAGTTGCCTTTTCTTGGAATTGATCGAACTCTTGCTACTTCACTTCCTGCAAAGTGCAATCTCACTCCCCCAGATAATTGCTCATAATTAAGCTTCTCTGAACTATTATTTGTGCTCTCTTTGTGTGTTGTAATCTTTTTTCTGCAGATAGATGACCTATTGAGAAAAAAGGAAATAATCGTACTCTAATTTCTATATCTCTTTTTTTTGTG…
GmaAffx.36409.1.S1_at	BQ473745	At5g48485	8e-14	Unclassified - Hypothetical Protein Supported by cDNA			CAATGGCCAATACTCGTTTTGTCGCATGCCCAGCGATGGGTTGGCGGCATGCAAGCCGAGTGTGAGTGGGGACTATCCTGCTGATCCCTCCACTGCTTGTTGCTCAGCCATTGCCAAGGCTGATCTTAAATGCTTCTGCCGCTTCAAGGATTCGGGCCTTCTCTCTATGTATGGTGTTGATCCCAACAAGTGCATGGAACTCCCTGTTAAGTGCAAGGTTGTCGACTCTTTCCACTGCTAGATTCATTAGAGGGGGCACTAATCAATATAAACTACACAAGGGCACTTAATTAACTATGTACTCTCGTTGATTGCCATTGTTAATTTTCTAGCTTGTGCCCCTGCTGTTTATGTTTCTTATTTTCCAACGTGCTTGTTGCTAATGTAATGGATCGTGGC…
GmaAffx.91488.1.S1_at	CF807129	At3g49780	0.0006	Unclassified - Hypothetical Protein Supported by cDNA			TGCTTTGTGGTTGAATTTTTGGTTAGTTTTCTCCTTTGGCCTTGGTTGAATTTTGTGTAATTTGCATACGTTGGTCCTTCTCCTAATTTTTATTCCATGAGAGGGTGTGATAAAA
Gma.5825.1.S1_x_at	CA937503	At1g74940	2e-27	Unclassified - Hypothetical Protein Supported by cDNA			GAAGGTGATATTATTCGGAGACAAAACAACAACAACAACAACAAAAACAACGTTGTAGTTCTCAGAAGAACCGAACCACAACCTTTGATTGAGCCCGAATCATCGTACCCCACATCGAGTTTTCTCAGTTCATGTCACTTATGTGGAAAGAAACTCCACGGCAAAGACATATACATGTACAGAGGAGAGAAAGCGTTTTGTAGCCCTGAGTGTCGTTCGAGTCAAATAACGATGGACGAAAGGAAGGAACGGTGTAGTTCAGAAGCTTCAAGGTCTGTGGAAATGTCAAGTTCGCCATATACAAGGGAACAAATATTTTCAACTGGGATTCTTGCGCTTTAGCGTCACTCTCTGGG
Gma.7986.1.S1_at	AW782198	At5g11090	0.0007	Unclassified - Hypothetical Protein Supported by cDNA			AGATCTAATGGATGCGCGGACGGTTTCCAAATCCAAGCGAAAACTGATTATGTGCTTCGTCTCTGTGTTTGCGTGTGTCTGTGTGTATATAATACAGAACTTATATATTCAGTTGCAGCCATTGATGGCCATTCTTGGAGCTTCTGGACCTAATTTTATGGAAAACG
Gma.17743.1.A1_at	AW348671	At2g06530	3e-87	Unclassified - Hypothetical Protein Supported by cDNA			AAATGAACTTGCCATCTTTGCAGAAAATCATGCAAGAATTTGAGAGACAGAATGAGAAGATGGAATTGACATCTGAGATGATGGGAGATGCAATAGATGATGCTTTGGAAGGAGAAGAAGATGAAGAGGAAACTGAAGATCTAGTTAACCAAGTCCTTGATGAGATTGGAATTGACATCAACCAAGAGCTTGTAAATGCACCATCATCAGCTGTTGCTGCCCCGGCTNCAAAGACAAAGGTACCNCAAGTTGAAACGACTGGGAATGATGATGGNGGGATAGATAGTGATTTACAGGCAAGGTTAGACAATTTAAGAAANATGTAATCTNTCCTCNNTATGATATCAGGGACTCNAGTTTTACTGGGNAAATTGATGCTCATNTGTACCNNATATAGCA…
Gma.6614.1.S1_at	BU082985	At5g63880	2e-20	Unclassified - Hypothetical Protein Supported by cDNA			GGAAATCCAGCTTACAGTCCAAGATCTTCCTGAAGTTCCTCCCTCAGCTAATGAAGAAATTGAAGAAAAGTTGGACCTTCCTGATGTCCCAACCAAAGCNCCTGTTACCAGTGATGCTGAAGTATCTACGAAAAGAAAAGTTATGGAGGAACCATTGGCAGCTTGAAGAACATTGCGACCCAAAACATGTCAATTGCTTTGCAAACCAAGGCATAAGATCTGACTTTGTGTTTGCCTGTATCCTTCAAATTCTGTTGCAAAATTCGTGCAGTTACTGGAGTTTGATTGGTTTTACCATTTGCAGTGACAT
GmaAffx.86112.1.S1_at	BI787565	At2g39760	2e-63	Unclassified - Hypothetical Protein Supported by cDNA			ATCATGAGCGACACTTTCACCGTTGGTGGTTACGATTGGGCTATTTACTTCTACCCNGATGGGAAGAACCCTGAGGACAATTCCATGTACGTTTCGGTCTTTATTGCGCTCGCTAGCGACGGAACCGATGTTAGGGCTCTCTTCAAGTTGACGCTGGTGGACCAGAGTGAGAAGGGGAATGATAAAGTTCATAGCCATTTCGATCGCCCTCTAGAGAGTGGACCTTATACCTTGAAGTATAAAGGCAGCATGTGGNNNNNNNNANNNNTNNNCNNAANNNNNNNNCTGGAAAATTCACTGTATCTAAAAAATGATTGCCTTGTCATGCATTGCACTGTTGGGGTCGTTAAAACTCGTTTTGAGGGATCTAAACAGGGTGTTATCGTGCCACAGTCA
GmaAffx.17892.1.S1_at	AI442822	At2g21970	3e-49	Unclassified - Hypothetical Protein Supported by cDNA			TTGAGATCATCTCTGGTCGTCTAGCTATGATGGTGTTTGCAGCGACGGTGACAATGGAANTGGTGACAGGNAACTCTNTGTTCAGAAAGATGGANATTGAAGGAATCACAGAGGCTGGTGGGGTGTGTTTGGGTGCAGTAACTTGNGCAGCACTCTTTGCATGGTTCTNCAGTGCNCGAAACAGAGTTGGTNGAATCTTCACCGTNAGCTGCAACGCATTCATNGANTCNGTAATTGACCAAATCNTNGATGGTTTGTTCTATGAAGGCGACNNNCCTACTGATTGGCCNGATGAACCGTGATCAAATATACCATTCTTNCCATTTTACANACTTTGCAGATTTAATGTGTCTAAAAACCATAGACACAGTTAGACTAAGATGTAATATTAAATAATAT…
Gma.684.2.A1_at	BU084534	At1g29390	5e-11	Unclassified - Hypothetical Protein Supported by cDNA			GCATTGCTCTTGCTGATGGTAGCTCCCTACGAGGCTATGAAATTAAGGTATACAAAAGAAGGTGCTGTGATTTCATTATTAATCTCGGTGTATCTGGCTTTCCAGCATTTCTCAAGAACAAGCTTACAACAATCATTTGACCAAGGTTCAATTGTTGCCACCTTAGCTGTCATTTGTATCACTGTTGTATCTTTGTTGCTTCTAATCTGAGTTGGCTTTGAAATGATGTACACAGTACNCTAATTGTAAATAAGAATAATAGTTGTTGGAGTGATGATATTAAAAAGTTATGGGTTATGTTGGATACTCAGTCTTGT
GmaAffx.8268.1.S1_at	BI972916	At1g56090	2e-12	Unclassified - Hypothetical Protein Supported by cDNA			TATTATTGCTGATTGTGCTCCCCATGAAACAGACCTCAAGTTTTCATCCAAGCAAGGANNANNNNAAAACAATGAGCCTAAGAAGTCCACAGCAGATGCTATAGCTCCTAAAGCACCAAACAAGGAATCTACCGAGCAACATTCAAAAGGATGGCAAACAATTCCAAAACCAAAAGGACATTCAGCTCTAGACTACGCACGGTGGGACAGTGTTGAAGATGATTCCAGTGATGATGACGATGAAGATGAAGATGAAGAGTCTCTGCCTCAGTACCGATTTCGTGTAAGAACAGTTGGTGTCCGTCCTGTAAAGTGAGACGATTCTACTGTACAGTACATATAAATGGCTTTTTTTATCCCATAGACTATAGTGAACATGTAAGTAACATTTGATGGGCA…
Gma.6941.1.S1_at	CD396371	At3g07950	1e-107	Unclassified - Hypothetical Protein Supported by cDNA			TTCCAACCATTATATCTGGCACGTATATAAGCTGGATTTATCTTAGATACTGGCAGAGGAAACCAGAAACTAAACATAGAGGTGANCTGAGTGAAGATTTTGCTTTCTCCACATTTTTNCCAGAATTTTTAAGACCNGTCATNGACCCTATCGCTTCAATATTTCATCGAATGCTCTGTGGAAGATATGATGCTTCTAATGATGNTNNNGGCNACAGTCTGGAAANTGAGCCTTTACCAGGTTCNGACTCAATTGAGGCATCCAGGAGANGAGAAAGAGGTGCTCGAGCACTGGAAGAACGATTGGCTGCAGAGAGGTTGGCTGNTGCACGACGTGAGTTGCAAAGAGAGGCTGAGGAAAATGTNTAATTCCNCAGNNTTTGTAAATTTNGGATCAGTT…
GmaAffx.29412.1.S1_s_at	CA851741		1e-09	Unclassified - Hypothetical Protein Supported by cDNA			GAAAGTCGGCCATAGTGATCCGGGAGTCCCGTGTGGAAGGGCTCTCGCTCAACGGATCAAAGGTACGCCGGGGATAACAGGCTGATGACTCCCAAGAGCTCTTATCGACGGAGTCGTTTGGCACCT
GmaAffx.69394.1.S1_at	BG157419	At3g15430	1e-148	Unclassified - Hypothetical Protein Supported by cDNA			ATTGATTTCCCACCTTTGGCACGAGTGGTTCACGTTTCAGCCTCCTTTAACCATGCAGCTNTNGTTATGCAATCTGGAGAGGTATTCACATGTGGAGATAATTCATCTTCTTGCTGTGGGCATAGAGATACAACCCGACCAATTTTCAGGCCACGCCTTGTTGAATCCCTGAAGGGAATTCCTTGCAAACAAGTTGCAGCGGGGCTTAATTTCACAGTCTTCCTCACCAGACAAGGTCATGTTTATACATGTGNANCCAACACACATGGCCAGCTTGGTCATGGTGATACTCAGGACAGGCCAACCCCCAAAATGATTGAAGTCCTTAGCTCTGTTGTTCAGATTGCTGCGGGACCAAGCTATATCTTATCCGTAACAGAAAATGGGACAGTATACTNC…
Gma.16916.2.S1_at	BE474155	At1g72160	1e-105	Unclassified - Hypothetical Protein Supported by cDNA			GTGTACTACAACGTGTTCGGTGAGTTTGAGGACAAGGAGTTGTACAACAAGACATTTTGGGACGAGGAGAAGAGGAACAAGTTGATAAGGTGGATGATTCAGTCGTTGGAGAAGAGCGTGAGAAGCCTTGACTTCTCTCCGACAGGCATATCGACAATAGTGCAGGTGAACGACCTTAAGAACTCTCCTGGGCTTGGCAAGAGGGAGCTGAGGCAGGCCACCAATCAGGTCCTTCAATTGTTTCAGGATAACTACCCTGAGTTT
Gma.10328.1.S1_at	BE058328	At1g52380	9e-59	Unclassified - Hypothetical Protein Supported by cDNA			GAAGCTCACAAATATGGACAAGAAGGGTGTTACTTTTGCCTGCNTCAATAGTGCCAGCGAAGGGAAAGGTGGTCTTTCAACATTTGCCTTGAAGTTCAAGGANGGCTCCATAGTGGAGGANTTTAAAGCCNCTGTNATGGAACACAAAGGTGAGACATCCACAGTTCTNAAGACCCCTGAAAATTCTCCAAAGGCTTCTGATGATTGANAGACACTCCTTACTCATGNCTCANAANGTCTGTCTNNNNANANNTNNNTTNNNANNNNNANTTNGNTNNNCCNNNNNNGNNTGCCCTTGTGTGGCATAGTCTATTATACTTAAA
Gma.3859.1.S1_at	BI470430	At3g21175	5e-53	Unclassified - Hypothetical Protein Supported by cDNA			TGCTGTTCCGGTCTAACAATTATGTAGTAGTCTGCGATATTGATGCTGGTATAAGTGCCAAGACATTGTTTGTGTATATGTTATCCGATGATCTTCCTTCTGTGTTTATATAAAAAAATTCATTAGTTAGGGCCTGTGTTGTAAAAANNNNNNNNNNNTNNNNNNNNNNNNANNNNNNTCATTGAGATCAAAGTTCTGCTACCCTCATTTTAGAGATGAAATTTCGGTGATATGCTATGCTATGCCACTCAAGGATGGGTTGCTGGTTTGAATATCAACGCAACGGTGTGCTAATCACGACCTTTGATGGAGTTTAGGCTTGTGCTGCTGTGCTCCTGGTGAGAACATTTGGATATGTTAATTAATACAGATAGACTAGATCCAAATGTACATACATAA…
GmaAffx.83057.1.S1_s_at	CA935881	At1g67340	1e-50	Unclassified - Hypothetical Protein Supported by cDNA			TCCTTCCGATTTCATCAACATCATCTTAACATGCAAGAGGCTAAACCGCTCAGGCCTGCACCGTCTTGTGTTGTCTAAAGCTGGGCCCAAAGTATTCGCCATAAAGCCGAAAAATTGGTCAGAATATGCTCACTCTTTTCTCAAACACTGCGTCAATGCCGGTAACGTGGATGCCTGTTACACTCTCGGAATGATCCGATTTTACTGTTTGA
Gma.5720.2.S1_s_at	BG652626	At1g51200	1e-25	Unclassified - Hypothetical Protein Supported by cDNA			AAGACTGGGTGCCAAGCTCCTCCTGAAGGTCCTATATTGTGCATCAACAACTGTGGGTTTTTTGGAAGTGCAGCTACCATGAACATGTGTTCTAAATGCCACAAAGACATATTGCTGAAACAGGAGCAGGCCAAGCTTGCAGCATCATCCATTGGGAATATTATGAATGGGTCATCAAGCAGCACTGAAAAGGAACCTGTTGTTGCTGCTGCTGCTAATATTGATATCCCAGTTATTCCAGTAGAGCCTAAAACTGTCTCTGTGCAACCTTTATTTGGTTCAGGTCCAG
Gma.10919.4.S1_x_at	BG046811	At2g36320	1e-16	Unclassified - Hypothetical Protein Supported by cDNA			ATTCTTGCAATTTCGTTGTACAAACAAAATTCCCCTATTTTCGGCACGCCTTTGTTGAATTTCCAATCTCTAATTTTTTTTCTTTCTATTTATACGTAATAATTCCAAAAAGCCTAACGCGAGAGATTCATCAGTTNTTCAATTATTCCTCGAATTTTGAAGGAATCATACAAACGCTTGAAATATTCGTCATCAACAACAACCTCACGCTGCTATAGATTTTTTTTTTCTCTTCTTACAGATCCAAACATGGCCGAAGAACACCGATGCCAAGCTCCCGAAGGTCACAGACTCTGCTCCAAC
GmaAffx.90586.1.S1_s_at	CF806311	At5g01960	1e-108	Unclassified - Hypothetical Protein Supported by cDNA			CCACCACCTTTCTGGCATACAATATTCATCATTTTGGTTAATGATACATTGGTGCGGCAAGCAGCGATGGCTTTCAAATGTTTGTTGCTTATTTACTACAAAAATGGAAGAGGCCATAACTTCCGTCGGCAGGGTCAAATGTTAACTTTGATTGAGTATACTCTGCTGCTGTATCGTGCTTTGTTGCCAACACCAGTTTGGTACCGATTTTTCTTGAACAAGGATTATGGAAGTCTCTTTTCCTCATTGACTACAGGATTGTATCTAACTTTCAAGCTAACATCAGTAGTTGAGAAGGTCCAATGCTTTGTTTCTGCCTTAAAAGCATTATCAAAAAAGGAAGTTCATTATGGGGTTTATGCCACAACGGAACAGGTGAATGCTGCTGGTGACTTGTGT…
GmaAffx.80262.1.S1_at	AW458205	At5g22000	2e-30	Unclassified - Hypothetical Protein Supported by cDNA			GTTCTCTCGGAACAACACTATGCCTGACCTTGGATCTGAAGTTAGGCGANAAGTTAATGCAGGGATTGCAACTGTGTCACGCATGATGGAACGCCTGGAGACCAGCGACAATAATAGAAGCAATAGCAATTCTGCCCCCAGTAATATAGAGGATGGTTCAGTTCAGGAATATAATGGTCAAACTTTAACACCAGGCAATGAAGGGGACGGTCTTTTGAGAGACAATAACACAAAAGCTTCTTGTGCTGCAGGCTCTAGTTCGAACTAGGCATGTAGAAGGAATTGCTTGAACTCTGAATTTGTTTTGTCCAAAAGGTAGAAATAGAATTGCCCATTGGGNATGTGAAATTCCATGGATGTGATGCATTGCCTATTGGCTGGCGCAGACCAGGCAAGTGA…
Gma.10616.1.S1_at	CD402599	At4g21790	3e-84	Unclassified - Hypothetical Protein Supported by cDNA			GGACTTGATTTATTACATGCTGGTTGAGGTCCTACCTTCAGCTTTAGTCCTCTACATCCTGCGCAAATTGCCCCCAAAGAGAATATCAGCCCAATATCATCCCATCCGTTAACTGCTGTTCATATTGGATCCTAATTTATTAATTTATCTGCCCATTGTTTATTATTTCAATGGTTCNNNGTTAGATGGATACTTTTAAGCTCATCAGGAAAAACAGATAAAGAAAAAGGATNCAGATAAANGNCTCATGGCAGCAGTTCNTATGTGNGTGATACTCAGCAGTTGCTACCTNGGAAGGAAANTTTGGATTCAGGTTTTGTACGGTATACATGCAATGACAAGNCTCAAGAACTTGAGTTATTCTCTGCAGTTTGGATGNTGTAGTGTTTCNGGCACAAG…
GmaAffx.40829.1.S1_at	BQ473174	At3g62770	1e-49	Unclassified - Hypothetical Protein Supported by cDNA			AGTGGCTGGCTGTCTCAAGTGACAAGGGGACCGTTCATGTCTTCAACCTCAAGGTTGATTCCGGACTGTTGGGGCATGATAGATCGCACAGTACTTCTGAGGCAAATCTTGCTAGCCCCACCGCGATGTCGTCTCTTTCCTTTTTTAAAGGTGTGCTACCCAAGTATTTTAGCTCAGAGTGGTCTGTGGCTCAATTTCGCTTGCAAGAAGGTTTGCAATATGTTGTTGCATTTGGCCATCAAAAGAATACAGTTGTAATACTAGGCATGGATGGCAGCTTCTATCGATGTCAGTTTGATTCTGCAGCTGGTGGAGAGATGACCCAACTTGAATATTACAATTTCCTAAAGGCAGAGGAGACATTCTAGTCTAGTATGGATGCATCATGTATAGATCTTC…
GmaAffx.80532.1.S1_at	AW620511	At1g21070	2e-62	Unclassified - Hypothetical Protein Supported by cDNA			GCTAGCCTGTGTAGATCTAGTGTCCGTAAAGCGGTTACCATTTCACCACTCACCACTACGAAGATGGAAAGCGAAAAGAAATCGTCGGCAATATCTGATGTGGGAGCATGGGCCATGAACGTTGTCAGCTCCGTCGGAATTATTATGGCCAACAAACAGCTTATGTCCAACAATGGCTATGCTTTCAGCTTTGCCAGTTCCTTAACTGGGTTCCACTTTGCCGTAACTGCTCTCGTTGGTCTGGTGTCAAATGCTACCGGTTACTCAGCGTCAAAGCATGTTCCTATGTGGGAGCTTATTTGGTTCTCACTGGTTGCCAATATGTCTATCACGGGGATGAACTTTAGCCTCATGCTCAACTCCGTTGGATTCTACCAAATATCAAAACTGAGCATGATT…
Gma.705.1.S1_a_at	BE823322	At2g14880	7e-31	Unclassified - Hypothetical Protein Supported by cDNA			AAATCCGTGGTATCATGAAACCCCGCAAAGTCTCCCCCGAGATGGAAGACCTCGTCGGCGCTCCCGAGATGGCTCGAACCCAAGTCCTCAAACGGATTTGGGCTTACATTAAGGACAACAATCTTCAGGACCCTACAGACAAGAGGACTATA
Gma.11428.1.S1_at	CA852590	At2g02180	0.0008	Unclassified - Hypothetical Protein Supported by cDNA			GAAAGGTGTTTGTATGTCTTCTACTAGAAAGTGTCTCCCACTCTATTCCTCTTACTGTTTTCCCATTCTTGCNGNNNNNNNNGGNNATNNNGNCNNNNNCTTTGGTCCTTTTCNTTTTGAGGAAGCTTCCACCTAAGCGTGGTATCANNCANTATCACCCAATTCGCTGAAAAGGGGATTTATCAATCGTTCACTATTTTCTTGAATGATTATCACTCTCCAAGGGTAATTTTTTAGAGTAGAGACAAGTCAGTCTTCTATGTTCGGTGGCAAAGCTTGTATGCTTTGTCTCTAGAACATTATGGTTTAGTTTTGCGATCCAGCATTTCGACACGATGATAATTGGGAGAAGGGGATATAGTGATATCTTGTATAATTAGTGTTTTGAACTGCTACGAG…
Gma.11962.1.A1_at	CD416828	At1g03110	2e-24	Unclassified - Hypothetical Protein Supported by cDNA			TCTACCTGGTTTTAATTATCCCTCTTTGGCTTGTGTGCGAGTAATTTCCAGTATTGATGTTGAGAAAGAGCCAGTTGTTCTGGGAGATGATAACATTCCTGGG
Gma.8026.1.S1_x_at	AW621035	At3g57890	0	Unclassified - Hypothetical Protein Supported by cDNA			GGGGCTACAAAAGGCAACCCATTCANGTTACCAGATGCCTATATGGNATCTCAGCATAAAAATCAAAAAAATTTAGGGGAGATAAGGCANCTCTTNCGAGAAGCACCTTTAGAAGANAGTCGCAAACGAGAATTGTCATCTGCACTTCATGTCTACTTCAAGGACTGGTTATATGCTTCAGGAAACATTCGTCAGCTTTATTGTNTACAAGGCGATTGATCTTTGTCAGACAATGGAATGGCACAGTTAATGGTANAGGAACGAGGTTTCTGGTTTCCTTTTTGTACTTCCTCTTNCAATTCCTCTTGCCAATTCTATTGGCGGCNTAGGTAGCTGAGATCANANGANGTGAATTAGAGTAAAACCTATTTATGCCGTGACATCAGCGGTGCACAGAAT…
Gma.14118.1.A1_at	CD415858	At1g68185	4e-06	Unclassified - Hypothetical Protein Supported by cDNA			GCCACATTTGGGAGTTACGTACCCTAGAAGGTTGTTTGTTTTTAGCATCTTTAGTACAAGAAAAACAGTGCCAGTTCGGCCGAACTGTATAGCACATTATTTTTTTATGTAATTGTCTAGTATCGCTCCTTTTGGTGGATGTTTCTTTGTTTATGGTATAGGTTTCTGATAATGCAG
Gma.12214.1.S1_at	BG653814	At3g07370	1e-106	Unclassified - Protein with Unknown Function			ATGATCCTGTAATCACTCCAAGTGGACTTACATATGAGAGAGCAGTGATTCTTGAGCATCTTCAGAAGGTGGGTAAATTCGACCCAATCACACGGGAACCCCTTGATCCATCACAGTTAGTGCCAAACTTGGCCATTAAGGAAGCGGTCGAGGCATTCTTGGACAAACATGGATGGGCCTACAAGATAGAATAANGNAAGATTAAGTTGCAAATTAACNATGCGTGGTAGNTTTTGTATGTTGAGCAATGCTGCAGGATGTTGTGTTCTGCAAGCGTGGCCATAGTTGTATGCTTTAATTGNNANTNNNNNNNNNNGTTTCCTGGGGTCCTGACTTCTCAACATCTTATTATGAAGTGTATATATGGTTGATTGTCGTATGCTGTGTAAATATAGTAGT…
GmaAffx.93453.1.S1_s_at	CF807372	At5g17540	1e-127	Unclassified - Protein with Unknown Function			CAAACTGATCAACGCTGCTCCAACTTCGAGGTCCTCACCGCATGCCTCTGGCGCTGCCGCACCATTGCGCTGCAGCCCGACAAAGACGAGGAGGTTCGCATCCTCTGCATAGTCAACGCTCGCTCCAAGTTTGACCCTCCTCTGCCTAGCGGTTACTACGGCAACGCTTTTGCCTTCCCCGTTGCTGTCACCACTGCGGGGAAGCTGTGCGATAACCCTTTGGGATACGCTCTCGAGTTGGTGAGGAAAGCCAAAGCGGATGTGACTGAGGAATACATGCACTCGGTGGCTGATTTAATGGTCACCAAGGGCCGGCCTCACTTCACTGTTGTGAGATCGTATCTCGTGTCGGATGTGACTCGTGC
GmaAffx.92932.1.S1_s_at	CF808678	At1g27730	2e-56	Unclassified - Protein with Unknown Function			TCCTCCGCCGTGACAACGAGTTCGGCGTCGAACGGCGGTGCTAGGACCCACGAGTGCTCCATCTGCCAAAAGACGTTCCCAACAGGACAGGCCTTGGGAGGACACAAACGTTGTCACTACGAAGGCGGTAACAGCGCCGTAACCGCCTCTGAGGGAGTGGGGTCCACTCACACAGGAAGCCACCGCGATTTCGATCTGAACCTCCCGGCTTTTCCGGACTTTTCAACAAGGTTCTTCGTTGATGACGAGGTTACCAGTCCTCATCCATCCAAGAAATCCCGTCTCAATTTGACCATACCCAAGATTGAAATCCCTCAATACTGATGATCCA
GmaAffx.2290.1.S1_at	AW350497	At3g53990	6e-53	Unclassified - Protein with Unknown Function			GATTGCTCTCAAATGGGCCATCGAAAACTTGGCTGATAAAGGCCAGACCTTGTACATCATCCACGTCAACCCTAATTCTTCTGATGATCGTAACCAGTTGTGGGTCAAATCTGGTTCTCCTCTTGTTCCTTTGNCAGAGTTCAGAGATGCAGNAGGTTACGAAGCACTATGGCGTGCAAACTGATGCAGAGGTTCTTGATTTGCTTGACACTGCTGCCAGGCAAAAAGAGGTCAACGTTGTGGTGAAATTGTACNNGGGTGATGTAAGAGAGAAACTTCTAGATTCCATTGAAGATCTGAAGCTAAACTCTTTGGTCTTGGGAAGCAGAGGTCTTGGAACAATTCAAAGGATGATATTGGGANGTGTTAGCAACTTCGTGATGACTCATGCTCCATGCC…
Gma.17877.1.S1_at	BQ612471		0.0002	Unclassified - Protein with Unknown Function			ATGCACAGTGACCACCATGGTGGCAGAAAGTTCCCTTTTGGTGGTCATCATCATGGTAATAATAACGCCTCTCAACATCATTTTCCAAACCATGGTGGGCACCATGAGTATTTTTCGGAGGAATCCGAGGAGTACGAGGAGTCTTATGCAGAGGAGCATGTTGGTGGAGTCACGGCTAAGGTGGATGAAATGAGATATGAGCGTCATAACTGGGGTGGTGGGGATACTCGCTATGCCAATCCCTATGGCATGAACATGAATCACAAACCCCACAAATTTCAGTGGACAGCAAAGG
Gma.17201.1.A1_at	BE440598	At5g20250	1e-06	Unclassified - Protein with Unknown Function			CAACAAGGTGTATGCTGGGAAACAATGNGGTGNTGNATTTNGATTACGACGCTGATTCCGGCTTGCTCATCTTCAACATAGATCATTTGCCGCAAGAGGGACACAGGGTTCACTTAGTTGAGTTAGTTTATAGTCTATCTTCTTAATTATTTAGTTACCATATTGTTGAATCAGAGAGGGAGAGGATATTGGTATGGTGGTGTGGTGGTATTTCTTTCTTTTGCTGGATAGGATACAGTAGAGGGTTTTCAACAATTTCTACTTTGTAAGATTTCACGAGCCATCTTTGTTTTCGAATTT
Gma.18104.1.S1_s_at	CD396950	At3g17210	4e-41	Unclassified - Protein with Unknown Function			AGCACGTTTTCCTTGCAAAGTTCAAGGACGACGTCACTCCAGAGCGGATTGAGGAGCTCATCAAGGACTATGCCAATCTTGTCAATCTCATCCCACCCATGAAGTCATTCCATTGGGGCAAGGATGTAAGTGCTGAAAACATGCATCAAGGCTTCACTCATGTGTTTGAATCAACCTTTGAGAGTACNGAANGGCATTGCAGAGTATACAGCTCATCCTGCCCATGTTGAATATGCAACTTTGTTCCTTTCCTACCTGGACAAAGTCATTGTGATTGACTATAAGCCTACCATTGTTAAGCTTTGATGGGAGAAGTTATGCCTCGTTCACTGCTAGTGTTCTTATAAAAATAAATTTGGTTTCCTATCTAAGCAATTCCTGTGTACACTACGANNNTCC…
Gma.1959.3.S1_a_at	BG509121	At4g35770	5e-21	Unclassified - Protein with Unknown Function			GAATCCATGCCACACCAGTTTTTCAGTTATAAACTCCCTGAATCCTCACAAGGGACGACGGATAAGCGTTGCTGTTCCACCCAAGTTTCCAAACTTCCGNAGGGAAGCATCTCTGCAGGGGAATTTGGAGGCTATTAGAGTCCCAACTTCGGTGCCTGTGCGTGTAGCATACGAGCTTCTTCTAGCTGGTCATCGATATTTGGATGTAAGGACCCCGGAAGAGTTCGATGCTGGACACGCTCCTGGCGCAATTAACATACCTTATATGTTCAGAGTTGGATC
GmaAffx.51957.1.S1_s_at	CA785233	At3g54680	8e-15	Unclassified - Protein with Unknown Function			TCCGAACCAGGATCGGACGCGATCTCGCTCCGACCCCTGGGCCGAACCGGAACCGGTTCACCGCTCTTGTCGCTCCCCGTTGTTTCCAGCCCCGACAAGGACTTGCCCTTGCTCTCTCCTCAGCCGCCCAAGACGGACAAGTTCGTACCGCCACACCTTCGGCCCGGGTTCGTTCCCAGGGAGGAGGCTCCCCCGCCCGGGCCCGAACTTCGGCCCAACGGCCGGCCCAAGTCGGGTGGCGGCCCGGACAGGATGAGAAGGGTTGGGCCGGGTGGCGTCTCGGATG
Gma.17294.1.A1_at	AW310775	At4g26590	1e-38	Unclassified - Protein with Unknown Function			TAATAGCTGGTAGTGGTGGCATCCCACCAGCCAGATCCGTCAACTACATTACTTGGGGAATGGTGGGAATCTTGTTCAATTTCTACGTTTACAATAAGTTCAAGGCATGGTGGGCTAGACACAATTACATCCTCTCAGCTGCTTTAGATGCTGGTGTTGCTTTCATGGGTGTCATTCTCTATTTTGCCCTTCAATATTATGATATTTTTGGTCCAACATGGTGGGGTCAAGATGCTGATGACCACTGTCCTTTGGCCAAATGCCCCACAGCTCCGGGCATAATTTCTCATGGATGTCCTGTTCTCTGACCTCATGCAAGTAAATTAAATTGGAACTTGAACAAACATGTTTACATTATCTCTACTTGTTTTCACTTCGATCCTTGTTGTATTCTAT
GmaAffx.61273.1.S1_at	AW101401	At1g23740	6e-44	Unclassified - Protein with Unknown Function	Hormone Induced		GTTTTTCAAGGACACTGATGCACCCTTACCTATTGTTCCAGGGTTTGATGCTGCTGGTGTGGTGGTGAGAGTGGGAAGTAAAGTGAGCAAATTCAAGGTTGGAGATGAAGTTTATGGTGATATCATTGAGTATGCTTGGAATAATCCAAAGACCATTGGGACTTTGGCAGAATATACTGCTACTGAGGAGAAAGTGTTGGCTCACAAACCCTCCAATTTAAGCTTTATTGAAGCAGCTAGCCTTCCTGCAGCCATCATCACTGCTTATCAAGGATTTGATAAAATTGAGTTTTCTGCTGGCAAATCTATACTTGTTCTAGGAGGTGCTGGTGGAGTTGGATCCCTTGTTATTCAGCTCGCCAAGCACGTTTTTGGCGCATCTAAGGTTGCAGCCACTGC…
Gma.15888.1.S1_at	CD415933	At5g01650	3e-49	Unclassified - Protein with Unknown Function			TCTCCACCAACGTTAACCTAGACGGCGTCGACACCTCCTCCATTCTCTCCGAAGCCACCTCAACCGTCGCCAGCATCATCGGCAAACCCGAGGCCTATGTGATGATTGTATTGAAAGGATCAGTGCCTATATCTCATGGTGGGAGTGAGCAGCCAGCAGCTTANGGTGAATTGGTGTCCATTGGTGGTCTTAGCCCTGACGTGAACNAGAAACTNAGTGCTGGCATTGCTTCAATTCTCGAAAACAAGTTGTCTGTGCCNAAGTCNCGATTCTACTTGAAGTTTTATGACACNAAGGGTTCCAANTTTGGATGGAATGGATCTACATTCTGAATTCCGAGTTATNTTGGTAANGATGCCATGGATGTCGGATGAACTCGTNATTCTGTTTTNGAACTTT…
Gma.7107.1.S1_at	AI855972	At5g40210	4e-06	Unclassified - Protein with Unknown Function			AGTACAAACTCTTCCACATTCTTATCATCATAAAAAAACATAAAGAATCCATTTTCTAGGCATACAACAGCATAGTACACATACATGNACTGNANGNTCAAAGCTNTGGATTCATTGTCNCNCNANATGANTCCNGTGCTGCTTATACCTAAGTTGTTGACTTGTTTTCCTCTAAAATAAAGCGAATGGAAGATTTTCAGTATATATGACATTGGATGGGATTGCATTCAGTTAAAGTTCTTTCTTGTCTCCTTTCACCAATGAGCAAACTAAGGGTGGTTATACATAGCATGCTGNTACTTGTGATATATACGTACTGTACACTTGCCTTAGAATGGAACCGATACTGTTCTTTCCACAAACGGGGAGCAACCTTTCTTCAAGTGTTTTATGGAAAAA…
Gma.13305.1.S1_at	CD393357	At5g32440	2e-15	Unclassified - Protein with Unknown Function			ACAATACAGCCCCTTTCCTGGGTGTTTCCCTCCTGATGCCTTCTAGGGCGATCAGTATGTAGGATATCATAATTGAGGCAGTAAAATAGCTGCATCTGGTTAATATCCCAAAGAAAAAAAATGCGTATTGTTAAATTGTTGCAGTTTGTGAAGCTCCTGTAGGTCAAGGAATAGTAACTGTTTCCAGTTCAGGGGCGATTCGGATAGAGTTTGATATTATAGATGAAATTATTCGTCAGTTTATTCAATTGTTTATTCCCCATTTTAGCATTGAGATTTGAGTGTACTGTAATTACTAAGGATGTTCAAGATCACTTTGATGTACCATCACAGCAGACTACTA
Gma.5709.1.S1_at	BG157556	At4g35110	1e-25	Unclassified - Protein with Unknown Function			GGCAAAGGCTAACTCTGATCGTGAAATGGAAACATTGAACAAAGAGCTGGAATCAAATCTGGAAAGTTTGGCTCAGAAAGAACAAGAGGTAACTGATATCAAAACAAGAATTGAAGNGATCAGAGAGCNTTTAAGCGAGCTTGAGCTGAAGTCTTNTGATTTGGNCAAGAACATCTTGTCAATCAAGTCCAAGGTTGATAATTTAGACAGCAAATCCTTGCTAGATGAACTAGTTTAATGAAANTNTNTNNNNNNTTTGTCTTTGAATTTCNTCCTCAGAATTATGGTAATGCTTAAATTGTAGAATATGGTACTGAATAAACGCATGAGCTATATTTTTAAGCTAGGCAATGGTATGAATACAA
GmaAffx.92184.1.S1_s_at	CF807909	At4g35110	2e-28	Unclassified - Protein with Unknown Function			AATGCTTCACCAAAAGTTGTTCCAATCACCTCTGTTGATGACACGGGATGTCTTACTAAACCAGATGGTGGGTCCATGAATTTTTGTTTCTCTGGTCTCCATGATAATGAGGACAGTGATGGAGAGGAGACTGAGTCTGTGGTTTCTGACTCGCGAGTCCCGGTTGGAAAATACCATGTGAAAGAAAGCTTTGCTCCCATCCTGAGATCCATCTTTGAAAAGTACGGGGACATAGGAGCAAGCTGCCATTTGGAATCAGTTGTTATGCGGTCATATTACGTTGAGTGTGTGTGCTTTGTGGTCCAAGAGCTACAATCTACCCCAATAATGCAATTGACAAAGTCTAAAATCAAGGAATTGATGGCTATTCTTAAGGATGTAGAATCTGCTCAGCTTCGC…
GmaAffx.93465.1.A1_s_at	CF809190	At5g23340	1e-39	Unclassified - Protein with Unknown Function			GAAACCTTGAGGCACTGGACATTGGTTGCTGTGAAGAGTTGACTGATGCTGCTTTTCAGCTATTAAGCAATGAGGAGCCTGGATTGAGTTTGAAGATTTTGAAGATTAGTAATTGTCCAAAGATCACAGTGGCAGGTATAGGCATCATTGTGGGTAAATGCACGTCTCTGCAATACTTGGATGTGAGGTCATGCCCGCATATTACAAAGGCTGGCCTAGATGAGGCTGGTTTCCATTTTCCTGAATGCTGCAAGATTAATTTTAATGGTAGCGTTAATGAGCCTGTTGTGCTTCTTTGATACTCTAATTATTTTAAAAGATTGGCTTCATAGTTAAATGTTCCTATATAAACTTTATTGATAAGGCGTGCCTTTGTATATTTGATGAGAATGTGGTCTG…
GmaAffx.92641.1.S1_s_at	CF808366		2e-15	Unclassified - Protein with Unknown Function			GTCAACATCCGCAGGGACCATCGCAATGCTTTGTTTTAAT
GmaAffx.90343.1.S1_at	CF806068	At5g15230	4e-36	Unclassified - Protein with Unknown Function			GTTCTTTGCTGCTATGATCTTGGCACTCNTTGCCATTTCCATNCTTCAAACAGTGGTNATGGCTGCTAATGANCAAGGAGGCCACTTGTATGACAACAAGAGCAAATATGGAAGTG
GmaAffx.33851.1.S1_at	BG652918	At4g20260	3e-40	Unclassified - Protein with Unknown Function			GTTGAAGCCCCTCCTGCAGTAGAAACTAAAACAGAAGAAGAAACAAGTAGTGTTGTCAAAGAGAGGGA
GmaAffx.33851.1.S1_s_at	BG652918	At4g20260	3e-40	Unclassified - Protein with Unknown Function			GCTATATATATGTAGCTGCTTCATGAAGATGCAGAAGATCNNNNNANNTNCNTNNNTNNTTNGNNNNNATANNCNNNAANNNTNNCANANNNNNNNCNNNTNNTTTTNTTCCNGTGNAAAATTGGTTTTGTGCTGCTTAGTTTGATATTGTTGCAGATTTGGTGATTGATATGCATGTCAATTAATGTTTTTATGATGAATCGTTTNNTAATANTNNTCATTTTTCAGTCAAGGAATTGTGACGTTTAGTTTGG
Gma.16938.1.S1_at	BI094938	At5g25100	1e-37	Unclassified - Protein with Unknown Function			TAGTTATAGCAACCAGTGGTTTTGGATTAATCTACTACACTTCTTGAAGGACGAAGGACCGGTTTGTGTAAGGATTTTGAAATTCAGGTACTGTCATGTTCAGAATCAGATGTAACCTATTCGTATACAATTTTGAATTGTGACGACTGTTATTCTTTTGTT
GmaAffx.81398.2.S1_at	BQ785562	At5g09390	1e-69	Unclassified - Protein with Unknown Function			TGATACCAGTAAGCCATCTACGGATGAAAATAATGCAGTTAGTCAATCTTCTTCAGATGCCATAAATTCTGGTCCTGAGGGTGGAGCATCTCAAAGCGANTTACGTGTATGATGAATCTTCTGGGTACTATTACAGCAGCAATTTGGGCTATTATTATGATCCAAATACAAGGCTCTATTACTCAGCAGCATCGGGGCAATGGTACTCCTTTAATGAGGAGACTAGCACATATGAAGAAGTTCACGAGGTTGCATCCAATGTGAGCTGAGTGACTGATTTAAGGGGGAGAATAGGCTATTTAGCATAGCCACAATCACTGTCTATCAGTGGCTCATCATGTACAGACCGAAGCACTCTTGATCTTTTTGTACGTTATGAGGGACTTTCTTCTTAGGTGC…
Gma.9244.2.S1_a_at	BG315755	At1g30300	1e-35	Unclassified - Protein with Unknown Function			CCTCTCTGTTAATCGATTATTACTCTCAAAGCGACGCCACTCACAAATATATATTGATCGACGCTGGCNAAGACNNCTTCANGGGAGANCTGTACTTAGNTNNTTTNNNNTCNNNNACATNCNNANNNNNNNNTTGGATTGGATGATATACGAGCTGTGCAGCCGTTTAGTCCCACTAATGATATT
GmaAffx.88678.1.S1_at	BU760549	At1g70770	9e-64	Unclassified - Protein with Unknown Function			TTTTCTGCTGTGACCGCATCTCAGTTTCCCTGGGTGAAATTGTTCAGGGAGTCAACTGTGGCTAAGATCACCGATACACCACTTTCTCACATATCTGATGCTGTATATAAAACATCAATGGACTGGATTAACCAACGTTCTCCTGAGGCACTTAGTACCTTTCTGATTTGGTCTTTAGATAGCATTCTTGCTGACTTGGGTAGCCAGCAAAATGTGGCCAAGGGTTCCAAAAAGGCCGTGCAACAAGTGTCCTCAAAATCTCAGGTTGCAATGTTCGTTGTTTTAGCAATGGTATTGCGTCGGAAGCCTGATGCTCTTATATCTGTATTGCCCACATTGAGG
Gma.2313.2.S1_s_at	BI700522	At4g27450	1e-105	Unclassified - Protein with Unknown Function			GTCCTGATCAATCTTTCTCTCGTCATCAAAGGNTGTTTTGTGGGATNGATNACATATANTGTCTCTTCTTGGGGAGCTTGAACAACTTGTCCCTACTCAACAAGCAATATGGATTGTCAAAGAGTACTGANGAGGCCATGTTTGTNATTGAAGCTTACAAGACACTCCGTGACCGGGGTCCATACCCTGCAGATCAAGTTGTCAAGGAGCTTGATGGCAGTTTTGCNTTTGTTGTCTATGACAGCAAGGTTGGCAGTGTCTTTGCAGCACTGGGTTCTGATGGAGGAGTGAAGNTGTATTGGGGTATTGCAGCTGATGGATCTGTGGTGATCTCTGATGATCTAGAAGTCATAAAAGAGGGTTGTGCCAAATCCTTTGCTCCCTTTCCAACAGGGTGTA…
GmaAffx.36066.1.S1_at	BI970282	At4g18590	2e-28	Unclassified - Protein with Unknown Function			AGTGGTTCAGGTGAGCCAATGTGATGGTGGGGTTNCCACAGCAAAATCCACNGATGACTGTCAATTAACCATAAAAGGGTTGCCACAAGTCCCTCTTATGAANTATATTGAGGTCATTGGCATTGCTGAAAGTAACANNTCTATTGATGCCGAAATATGGACTGACTTTGGNAGNACNTTTGNNACNNNCNNTTACNATCAGTTGTGCCAACTAGCCAATGGTGAATTTAAGGGTCTGTTTCTCTAGGGACATCAAGGAATGTCGGGTCAGCAATTGGATGGGGTTTGTTTGAAGTTGCTGCTTTTTATACTTGCACCTGTTTACATGTAAATGTAGGAACTATGCTTTTGAGTATGGTATCCGCAGAGGAGCAGGGCACATGTGCTCTGTAGGAACT
Gma.5895.1.S1_at	BQ610249	At4g28000	3e-85	Unclassified - Protein with Unknown Function			AGTCAGGTGGCTGCAAGTTTTGCGTCAGAAGGATCCGTAATGAATGAGTTGAAGCAGTGGAATGATTTGTATGGAGAAGGAGGTNCNAGGAANANACAACAACTCACTTACTTCCTATAGATTGTGGAATGCTACTTTTATTTTTGGTTTTGTGACCATTCATCCTCAACGATACATTTCAACAAAGGAAGGAATCCTTCACCAGAGATGTTGAATTGAAAGCATGCCGAAATGTCAGAGATCTTATGATTCCCAGAAAAGCTCGAGTTCTGGCACACACTTCTAATCTCTAAAGGATGTGTAGACCATCATGCACTATGTTTAGGAAAGGGTTCTCGGTTTTTGCTTGGGTTGACTAGAAACAA
Gma.11326.2.S1_at	AW350021	At5g19140	1e-105	Unclassified - Protein with Unknown Function	Stress Induced		GAAGGGTCAGCAGTCCTTGCAGGCACAGAGTAAAAGATNCATTTTCAAATAAAGTACCGTGTGATGTATTAATGGAGTAATGTGTTTATGTGCTTGTGACGGTAAGGCTTGCATGCGGGGCCATGTAAATACCTTTAATGATAACTATGAGAAGAATGTGACTGGTAGTAGAGTTTATCATGGTGTTCATTAGCTAGGATTTTCTCTGTTTCT
Gma.2677.1.S1_at	CA937161	At2g46370	1e-172	Unclassified - Protein with Unknown Function	Hormone Induced		GAAGGATTTACAATTAGCCGTGGAAGCTGCAGGGAAGTTGCTAGCAGAGGAGAAACTGGAAGTAGTTGACTTCAGTAGCCAGGTTGATTTATCCAAAGAACCAGGGCACTATGTCATCTT
Gma.2386.1.S1_a_at	BM568050	At3g59690	8e-67	Unclassified - Protein with Unknown Function			TTCAGCCCGGGCCAAAGCACGTGCTAGNAGTAATCCTAGAGAAAGGCTTGGTGGAACTCCAACTAGTACTGATTCAAAGAGGAGGCTCTCATTCCCTTTATCACAAGGAATTGGATCATTCAAGTGGTCTAAAGGGTTCTCAAGCAAGGATCAAAGGGTGCCAGACAAATTTCAGTCACTT
GmaAffx.87789.1.S1_at	BM567887	At4g36720	2e-55	Unclassified - Protein with Unknown Function			TACTGGGCAGCCTATGGTTCATTCAGNCTNGNTGAAGTGTTCACNGACAAGCTTATTTCTTGGTGTCCTATNTACTATCACCTGAAGTTTGCATTTCTTGTTTGGCTTCAACTTCCANCTACCAGTGGNGCAAAACAAATATATGCAAACCACTTGCGCCCCTTNTTGTNGAGGCATCAAGCACGAGTTGATCAAGTCTTGGGTTTTGCATATTGTGAAGTGATAAAACTNGTNAGTTCATACCAAGCAGAGATCCAGTTTGTCAGGAGCATGGTAGTAAAGATAACTGGATCAGCGGATCAAATGTTGAGAGGCNNTGCTGAATCAGATANNNGATCGCCGCAACATANTTCANCCGAAGACCCNGCCTCTGATGCTGAANCNGACCAAAACCACAAT…
