# Supplementary material for: Microarray Detection Call Methodology as a Means to Identify and Compare Transcripts Expressed within Syncytial Cells from Soybean (Glycine max) Roots Undergoing Resistant and Susceptible Reactions to the Soybean Cyst Nematode (Heterodera glycines)
Source: Hindawi journal article supplement (doi:10.1155/2010/491217), 2010-01-01
Supplement: f5 [file 491217.f5.xls]

## Sheet: Sheet1
Probe Set ID	Representative Public ID	At Gene ID	At BLAST E-value	Functional Category	Subfamily	Gene Family	Sequence
Gma.10796.1.S1_a_at	BE819933	At5g05170	9e-26	Cell Growth & Division			GACCCGTTTACGACAAGAGTCACTGGTCCTGATGTTGAGCAGTGTGGAATCAACTGCTAGAGAAATAAAAGCTGGCAGATTGAACAACAGCTTTCCACTCACCTGTGTCAACCAACAACATAAGCCTGATGGAATGTTGTGTTTGTCTTCCAATTCTTTTGTTTACAGATTTTGATATTTGCTTCTGCTTGTTTAAGTTATGTGCAGTTAATGGTTCATACAGAGGAAAACATGTTTAAGTATGTGCAGTTAATGGTCCATACAGAAGAAAACAGGNTTAAGTTATGTGCAGTTGATGGTCCATACAGAAGAAATCAAATTAGAATCAAATCATTTAAGGTTGCTTANTTTTTTGTAATACTATGAACATACCTTCCATTCTTTTGAAGAAGC
Gma.10796.2.S1_at	CA935397	At5g05170	0	Cell Growth & Division			ATAGAACAACAACTTGCCACTCACCTGTTTCAACCAACAACATAAGCCTCCTGGGAATGTTGTGATTGTCTTCCAATTCTTTTGTTTACAGATTTTGATATTTATTCTTGCTGATTTAAGTTATGTGCAGTTTATGGTCCANNNNNNGAAGAAGAAATCATGTTTAAGTTATGTGCAGTTAATGGTCCATACAGAAGAAATCAAATTAGAATCAAATTATTTAAGGTTGTTTATTTTTTTTGTAATACTATGAACATACCTTCCATTCTTTTGAAGAAGCTGTTTGTCTTATTTAAACTATTCATCAGAAGACCACATCCTTGTATACGTCTTTGTTATATTAACGAGTTTTTCTTCTG
Gma.10862.1.S1_a_at	BI969361	At4g32410	0	Cell Growth & Division			TGGGCAGGCAAAATCGTACCCCAACCATTGTTATTGTTTGGTCCGTTCTTCTTGCTTCAATATTCTCCTTGCTGTGGGTGAGGATTGATCCCTTCAC
Gma.10862.2.S1_x_at	AW310022	At5g05170	3e-15	Cell Growth & Division			TGGTCCGTTCTTCTTGCTTCAATATTCTCCTTGCTGTGGGTGAGGATTGATCCCTTCACCTCTGACTCCAACAAATTAACCAATGGTCAATGTGGCATCAACTGTTAGTTCTCTTGTATGATTCATTTTGTGTTGTTATTCCCTTTTGCTTGGAGATACACAAGGTTGCTGTCGTGTATATAGCAAGAATTTTCAGCCTATCAAAGTTGTCTGGAGGATTGAACCCCTGAAATAGATGGGAATGTACCCTCTCTGTTTCTATTAT
Gma.14281.1.S1_at	BI968274	At5g38470	1e-92	Cell Growth & Division			TGAGATTGATTCGAGACCATCAAGCTGACTTCCTTCGCNTGATAAATGAACCTGCNGAAGGTGNNGAAGGGAANATATTGGGGCAGATGGCTTCTGNNATGCCACAAGCAGTAACNGTCACNCCTGAGGAGCGNCANGCAATTGAACGTCTTGAAGCAATGGGTTTTGATCGTGCAATCGTATTGGAGGTGTACTTCGCTTGNAACAAAAATGAGGAATTGGCTGCCAACTACCTTTTNGATCACATGCATGAGTTCGAGGAACAATAGATCTNCTTTNGAATTTGCCAAATTATTTCNTGTCATCTTTTTNTCTCGATGGGTCTTTGTTACANNCTATGTTTAATGAGGTAATGCTTNNGATAATGTCAAATCTCAAGTGGATAAGGGATGTTTTANT…
Gma.15130.1.S1_at	CA935370	At2g19770	2e-49	Cell Growth & Division			GAAATAACTGCTATCATGAATGACTTTAACGAGCCTGGATCACTTGCTCCAACTGGATTGTTTCTCGCTGCCACCAAATACATGGTCATCCAGGGCGAGCCTGGTGCCGTCATTCGAGGCAAGAAGGGTCCTGGTGGTGTTACTGTGAAGAAGACCGGTGCGGCCTTGATCATTGGCATTTATGACGAACCAATGGCTCCGGGTCAGTGCAACATGGTAGTGGAAAGGCTTGGTGATTATCTCATTGAACAGGGTCTCTAATCCTCTATTTATGTCTTGCTATCGTGCATATTTCATTGGCTTCTGTACGAGTTTTTGCATCGACCTCGACTGTAATGCTTTGATTGCAGTGTAATAATATTGTTGGGTGGGTATCAAAAGTCACGGCATGTGCGTGTT…
Gma.15151.2.A1_s_at	BU577357	At3g27280	7e-18	Cell Growth & Division			TGCTGTGTGATGACATGCTTGGATCATCNTTGTCTTTAGTTTTTCCGTTGTTGGAAATATTTTTCTTGTGTTTTCACTTGTAGACTCTCTCATTTGAGCATAGTTCATAATGATTTTAGGAAGGTAATAAGTTAGAAATGAATTTGGACCTTCGTTTTTTCATGGTGAAAGGGTCTGTTTAGTTGCAGAGTAAAAACTATCTCCAAAGTATATAAGGTGAGAGAGGAACTTGAATACTTGATTGTGTGGTTAATGTTGGTTCTTTGAC
Gma.2911.1.S1_a_at	BM891517	At5g56950	1e-106	Cell Growth & Division			CCCTTCTCTTATTTTGCGCCTGGTAGAGAGAATGTGGTTATAGGTAGAGATGCTGTGATTTGT
Gma.2911.1.S1_x_at	BM891517	At5g56950	1e-106	Cell Growth & Division			GACAAGATTATTCCCCATGCTGTATCATGGTTTACTGGGGAGGCCATTCAGGGGGANGAGTTTGGAGATCTGGAGGATGACGAGGATGATGAAGATATTGAAGAGGATGATGATGAAGAGGAGGAGGAAGATGAAGATGACGATGATGACGAAGATGATGAGGAAGAAAGCAAGACTAAAAAGAAGTCATCAGCACCTAAGAAGAGTGGAAGAGCACAGCTTGGTGATGGCCAGCAGGGTGAGCGACCTCCAGAGTGCAAGCAGCAGTAGATGCAGAAGGTCATTTATGTAGTTGTTGAGTTTTGTTGGTGTTCGAGAATGTTTGATGTGAAAGTGGGTTTCATGTTTTAATGCTTCTTAAGTTGATTTTCCTCACTATATCTTGGTAGTTCGAATTTG…
Gma.2911.2.S1_a_at	BU926887	At5g56950	1e-15	Cell Growth & Division			GGTGTTCGAGAATGTCCTAATGTGAAAGTGGGTTTCATGTTGTTTTTTAATGTTTCTTAAATTGATTTTCCTCCCTATATCTTGGCAGTCCGAATTTGTTGCGAGTCCCTTCTCTTATTTTGCGCCTGGTAGAGAGAATGTGGTTATAGGTAGAGATGCTGTGATTTGTTTATGCTGGAATTTGTACTGCCATCAGTATACTTGA
Gma.3450.2.S1_at	BE329952	At1g62040	7e-56	Cell Growth & Division			AGGCTGAGTCTGCTCGCATTAGAGACAAGTATCCTGATAGAATACCTGTGATTGTTGAGAAAGCTGAAAGAAGTGACATCCCAGACATCGATAAGAAGAAGTACCTTGTCCCAGCAGATTTGACTGTTGGCCAATTTGTTTATGTTGTCCGTAAAAGGATTAAGGTCAGTGCAGAGAAGGCTATTTTTGTTTTTGTCAATAACACTCTACCTCCAACTGCCGCTTTGATGTCTTCTATTTATGAGGAAAATAAAGACGATGATGGTTTTCTTTACATGACTTACAGTGGAGAGAACACTTTCGGTTCTCGCTAGGGTCAAATTTAATAATATATGAGATCCTCTGTAAATAGATGCTGCAAGATGTAAACTTTCTGCTGTCGATAGTCGATGCCTATCC…
Gma.437.1.S1_s_at	CD401627	At4g29350	3e-44	Cell Growth & Division			GAGTATGAAAAGTCACGGGATCTGCGTGTNGNGAAGAAAGTGTTTGATGCTTGAGAAATGATGACTATAATCTCTATCTTTGTACTTTTTTAGTGGGGTACCTGTATACATTACA
Gma.4420.1.S1_s_at	CD390821	At5g38470	6e-94	Cell Growth & Division			AACAGTCAACAGTTCCAAGCCTTACGCGCTATGGTACAGGCTAATCCACAAATATTGCAGCCTATGCTACAAGAGCTTGGCAAACAAAATCCTCATCTTATGCGATTGATTCAAGAGCATCAAGTTGACTTCCTTCGCCTAATTAATGAACCNGTTGAAGGGGGTGAGGGAAATATACTGGGACAGCTNGCTNGTGCCATGCCGCAAGCAGTGACNGTCACCCCTGAGGANCGGCAAGCAATTGANCGTCTCGAAGCAATGGGNTTTGATCGTGCAACTGTATTGGAGGTGTACTTNGCTTGTAACAAAAATGAGGAGCTGGCTGCCAACTACCTTTTAGATCACATGCANGANTTTGATGAATAATTAGATCTCCTTTNCAATTTGTCAAAATANTTG…
Gma.525.1.S1_at	CF921971	At5g61640	7e-68	Cell Growth & Division			TGGTTTGCACCGGAACCACTAACCACGTTGAAGTGGTTCGGGTCCAGTTCGACCCGAAGGTTTGCCCCTACAATGATCTACTCGCTCTCTTTTGGTCTCGGCATGACCCCACTTCCATCAACCGTCAGGGCAATGATGTGGGTGCACAGTATAGATCAGGAATATACTACTACAACGATACCCAAGCTCGTTTAGGCCAGGAATCAAAAGATGCAAAACAATTGGAACTGAAGGAGAAGATTGTGACAGAAATACTTCCAGCAAAGAGGTTTTACAAAGCAGAGGAATACCATCAACAATATCTGGAGAAGGGTGGAGGTCAAGGCAACAAACAATCCGCAGAAAAAGGCTGCACTGATCCCATCAGGTGCTATGGCTGATGAATGATGATCACTTTCT…
Gma.5418.1.S1_at	BG237178	At2g21770	3e-50	Cell Growth & Division			GCTATTCTCCTGTCTTCAATCTTAACCCTACTTTGGGTGAGAATCAACCCATTNTTGGCCAAAAGTGATGTGGTGTTGGAAATTTGTGGATTGAATTGTGACTAAAGGTAACAAAAAATGGAAGGGCATGCCATGGTTTGACGTTTTACACTGATAAGATCTGCAACATGCATAAGTTTTTGGTCAAAGACACATGACACATCCCTGGATCTGTTGGTGAGAACTGCCACTGCAAAAAAAAATGTTATTNGTGGGTGGTGTTTGTAGATACAANANTATGTTTTGAGAGGTTTCATTATTTTTTTTTATACATGTGCATTATCTAAATTAGTCTGAAATCACAGGTGAGATGTTATTTATAACTTCTTCGGAATAAGGCATCTCTCATTTGTAATCATA…
Gma.5497.1.S1_at	CD414002	At2g27960	9e-39	Cell Growth & Division	Cell Cycle		TCCGAAAATGAGTGGCGGGCAATTGGGGTTCAGCAGAGCCGTGGCTGGGTTCATTATGCAATTCATCGCCCTGAGCCACACATAATGCTCTTCAGGAGGCCTTTGAATTATCAGCAGCAGCAGGAAAACCAGGCCCAGCAAAGCATGCTTGTCAAATGAACACTATCTATGCAAATCTGAAAGTGGGATTACAATGTTATATAGGTTTTAATTTTGTTGGTAATATGGATGTTATGAAGAATGAAGAACCCTGGTGGAATTCTCTTTTTGTGGAGAATTTTCATGTGGTTTCAACTGTCATTTTAATGTGTTGTTGACATGATGATGTGTCATGGATTTTTATTGGTGTACCTCTCGTGTACTCTTATNNGCTCGGTGGATTATATAATAGTCATTATC…
Gma.5594.1.S1_at	BQ786297	At3g09840	3e-21	Cell Growth & Division			AGAAATCAAGGCTGCTCATTTTGAGGAATCAATGAAATATGCTCGAAGGAGTGTTAGCGATGCTGACATTCGCAAGTACCAGGCATTCGCCCAAACATTACAGCAGTCTAGAGGATTTGGAAGTGAGTTCAGGTTTGCAGATTCCACCTCCGCCGGTGGTACAGCTGCTGCATCTGACCCATTTTCCTCTGCTGGTGGAGCTGACGAGGATGATCTTTACAATTANNTNNNNTTGTATGCCTGTTATTTGTTCGTATATGCCGTGCTATCTTAATTATCTACTTCTCATTTCGTGTATGCAAATGAGGTCTGTAAACGCTTCCTTTGGATTATTATTGTCTATTGTTTTTGCAAACGGCATTTGTTCATATGGCCAGAGCATTAGGTTCGAGCCTCTTC…
Gma.6330.1.S1_at	BE658773	At1g62040	4e-58	Cell Growth & Division			TAAGAGAGAAGTATCCTGACAGAATTCCAGTAATTGTTGAAAGGGCTGAGAAGAGTGATGTTCCTGAAATTGACAAGAAAAAGTATCTTGTACCCGCTGATTTGACTGTTGGTCAGTTTGTGTATGTGGTGCGGAAGAGAATCAAGCTGAGTCCTGAGAAGGCGATCTTCATTTTTGTTAAGAATATTTTACCACCAACTGCGGCAATGATGTCTGCAATTTATGAGGAAAACAAGGATGAAGATGGCTTTCTATATATGACTTACAGTGGAGAGAACACATTTGGGCTTGTGTTCTGAAATAATCCGTCGTGACAGGCAACCATCTGAATAGAACTTCCTAAAATTGACCAATGTTAAGAAGTCAGCTTAATTGTAAATTCTCTGGTTTGATGCTTTT…
Gma.6791.1.S1_s_at	BE801043	At1g03080	8e-15	Cell Growth & Division			ATGTGTGCGACCTCCCACCAAGGGAGATTGATTGTTACCATATAGTTTGAAGTAAGTGAGACATTAGCTTTCTTGTTTGTAAAATTTTGTTTCTAAGGATGCTTCAAGACCCTACATATTTTGATCATGCTGTACATGTTGTGCCTCATTTACTCGTAAGAAGAGGCCAAGGCTA
Gma.6815.1.S1_at	BQ610426	At5g55310	0	Cell Growth & Division			CCCCTTCGAAGAGTTCAGATGGAAAGAGAAAAAAGAACTTGNGTCCCGAAATGCTAGAGAAAAAGATATCTCAAACCAATGCAAAAATTGAGAAAATGCAACGTGATATGAAGACAAAAGAAGATCTGAAAACTGTGGCATTGGGCACATCCAAGATAAACTACCTTGACCCTAGGATTACAGTTGCCTGGTGCAAGCGGCATGAAGTTCCTATTGAAAAGATTTTCAACAAGTCTCTGCTGGCGAAATTCTGTTGGGCAATGGATGTGGATCCTGACTTCAGATTCTGAGATCTATAGAATGGAGCCATGTTATGATGGGTGGGGAAAAACATTTCTTTTTTACTTATTTCTTTTCTATAAGATTTTTTTTGTTTCGTCAATTTTAGCGGAAATTGAT…
Gma.8173.1.A1_at	BF598954	At1g26830	6e-97	Cell Growth & Division			TCGAAGCAGCCATTGTGAGGATAATGAAGTCTAGGCGGACTCTAGATCATAATAATATTGTTGCTGAGGTCACAAAGCAGCTGCAGTCACGGTTTTTGCCTAATCCTGTTGTTATTAAGAANAGGATTGAATCCCTTATTGAGCGTGAGTTTTTGGAGAGGGATAAAGTGGACAGAAAACTGTACCGCTATCTTGCTTGAACTGTATGTGCTTTTGATTTGGCATGGCNCTTGTGTGATTCTGTCTGTCATAAGTTTGANTGCACATCACAAATTGCCGCAAGTAGTGTAACTCTCNNNTGCATACTCAACNAAACCTAGATTTNTNAGGGTTACTTCNTTTCAGGCTGCNAAACTTNAATATATCNNNTTTNNNTNCTTANNTNTANNNAAAAATAAA…
Gma.8420.1.S1_at	D50871.1	At2g26760	1e-108	Cell Growth & Division	Cell Cycle		TATCACTTTTTGGTTAGGGATACCAAAGCCTCCACTCCGTCTGACAAAGAGATGGAGAACATGGTGTTTTTCCTTGCTGAACTTGGATTGATGCATTATCCTACTGTAATCTTGTACCGTCCTTCTCTGATTGCTGCTTCTGCTGTGTTTGCGGCTCGATGTACCCTTGGAAGGAGCCCTTTCTGGACAAACACTTTGATGCACTACACAGGCTACTCTGAGGAGCAACTAAGGGATTGCGCCAAAATCATGGCCAACCTTCATGCTGCTGCTGCACCAGGAAGTAAGCTTAGGGCAGTTTACAAGAAATTCTCTAACTCGGATCTTTCTGCTGTTGCTCTTCTTTCTCCAGNNNNGNNNNTNNNAGNANNNNNNNNAGNNAGNNNNNNAGGGGAAGTT…
Gma.9505.1.S1_at	BI786624	At5g63190	1e-105	Cell Growth & Division			TCTTTCAAAATTATGTCACCGACAGATATTCCTATGAATCTCAGTCGTTGTGTAAATTTGGTCTTATATTTCGTTNANAGCTTTTTAGAATGGTGTTGCGTCAAGAGGTATGAGAGGAATATAGTGTATTTTTCAGCCTTAA
GmaAffx.12491.1.S1_at	BE347527	At1g58025	3e-09	Cell Growth & Division			ATAGTCAGTCTGTCTGGAGTGGACCACACTCACTAATACGGAAGACAAATTCTGCTCGGACTAGTTCAATTCACGCTGCTATAAGGACTTTCATGGAGTAGCTTTTTATCTTTATCAGTTCACTACACTTCCTAGCAGCCTATGTCATTAATATTTTAGTTGATGTCCCTTCGTTATTATATGGTGTATTATAGTTCTCAGTTTCTTGATAACAACAGCAGATTTTGTAACAGAAGAATTTGTGCTTCAAACCAGTTCTACTTAAAAAATTATGAAAGNAAAAGTAACCTGCCACTTGCCGTCATAGCTCAAGTGGTCAA
GmaAffx.88982.1.A1_s_at	CK605701	At4g24010	2e-24	Cell Growth & Division			CGGACCCTTGGTTTGCAGTGTTTGCATTTGTGTATGTATCTACTCAAATTCAACATTTGATTGAGGTTCTATCTGGGGATGGCTCTGTGGCTATGTGGTGGGATGAACAAAGAATTTGGATTCTGAAGTCAGTTACCAGCATATTTGCAATTATAGATGGAATCAAGAAGTGGCTGGGGTTGAACAAGGTGAAATTCAACTTGTCAAACAAAGCCATTGACAAAGAGAAGCTCAAGAAATATGAGCAAGGTAGGTTCGATTTCCAAGGTGCAGCTGTGTTCATGGCTCCATTGGTCCTATTACTCATAGCCAACATTGTTAGCTTCTTTGTTGGTATATGGAGACTATTCAATTTCAATGTGAAGGATTTTGAAGAAATGTTTGGTCAACTTTTCCTAG…
GmaAffx.90790.1.S1_s_at	CF806515	At5g63190	2e-47	Cell Growth & Division			GAAGCATGCCAGTGTATCCGTGACCTGGGAATGCCTTTCTTCAACCACGAGGTTGTCAAGAAAGCTTTGGTTATGGCCATGGAGAAGAAGAATGATAGGATGCTGGATCTGCTGCAGGAATGTTTCAGTGAAGGTCTAATAACCATCAATCAGATGACCAAAGGGTTCACCAGAATCAAGGACGGTCTTGATGATCTCGCTCTGGACATTCCAAACGCTAACGAGAAATTCAGCTTCTATTTGGAGCATGCCCTGAAGAAGGGCTGGCTCCTACCATCATTTGATTCCACTGCCACAGATGTCTAACTGGCCCAGGCTGCAGCAGCTTCTTGAGGAGGACTATATTTTCATTGTTTCTCTTATATATGTTGTTGCACTTTAGCTTCCGCTGAATGTGGA…
GmaAffx.91087.1.S1_s_at	CF806812	At4g11050	1e-22	Cell Structure			AGTCTCAATTCTCTCAATCTTTCAATATCCAAGCTTTATGGTCCAATCTGGGGTGTCACAAAGTCAGGTGATTCATACACATTCCCATCATGGCTCAGCTCATTATCAGCTGGCAAAAGCCTTGAATTTGTCTACATCCATTCTGCTTCTCCAGCAGATGTCTCCGTGGCGAACTACGTGTTGGCCTGAAAGTGGCATGGGAATGGTTTACTGCTTTCTTGTGTAAGACTGTGTAGCCATACAAATGTGCAGCGAGGGGAGTGTCTTTACGTTTTTCCTTCTATAATTTGGTGTCAAATCTTCTTCTTCTTCTTCCCTTGTGTATTTTGCATTTCAGTAGGTTAGATCAAAATAGGTAGATTATATAAGATGGAAGGACCGGAGCAGAAAGGAGTGAAG…
GmaAffx.90181.1.S1_at	CF808382	At5g09810	4e-55	Cell Structure			AGTGCTTCTAAGTTGGGTCAAGAGCTGGATGGT
GmaAffx.90437.1.A1_s_at	CF806162	At5g19780	6e-73	Cell Structure			GTATGCCAAGCGTGCTTTTGTCCACTGGTACGTGGGTGAGGGTATGGAAGAAGGTGAATTTTTTGAAGCCCGTGAGGACCTTGCAGCCCTTGAGAAGGATTATGAAGAAGTGGGTGCTGAGTCTGGTGAGGGCCAGGAAGAGGATGAAGACTACTAGAATCTACTTCAGATTCTTGTTCTTGTGGTCTGTTTTCTGTTGTGTTTGATGTTCAGATGTGTACCAGTACCGATGTGGTTTTAATTTGGATGCATTGCTTTTATGCTTCGCTGCTCCTGTTACGTACCTAAACTGAA
GmaAffx.88908.1.A1_x_at	CK605775	At5g59880	1e-64	Cell Structure			CAACCTTGCGTTTGAGTGCCATTTTAGTCGTCTTATCCCTTACTAGTTGAATTTGTAACTGTTTGTGTTATCAGACAAAAAATGGGGTTTCTTCACTTATTGACACTCGTC
GmaAffx.88705.1.S1_s_at	CK606623	At2g18050	2e-24	Cell Structure	Histone		TGTGCCTTGCTGCACAATCTTGAAGAAAGTTGTGTAGTGTAGGATGGTAGATAGTTTAGT
GmaAffx.88786.1.A1_s_at	CK606552	At4g34050	1e-108	Cell Structure			AGTGTCTACCCAAGAGAACCTGAATCCATGAAAGAACTGAGAGAGTTGACAGCAAAACACCCATGGAACATCATGACAACCTCTGCAGACGAAGGGCAGTTCTTGAACATGCTCCTTAAGCTCA
GmaAffx.87008.1.S1_at	BE804610	At3g16850	1e-128	Cell Structure			GAATAGTTGATTCGCCTTTCACTCCTATCTGTCTTTNNAACGNGACNTTTTCTNCCAGTTCNGAGTCATCNNNTCCTTCATGGTTTTGTTCTNACNTAATGGGAATCTCCNAGGANGTGTTTCCTGAGCCATGTCCTGATCTGCAGAACACGTATTCAAACTTTTCCTCTTGCTTTTCTTCCCTACATCCGTCGTCTAGTTNTGTCTCAAGCGCATGAGATNGCCATCTCTAAGNATCTAGTCATTNCTTTGATTCAACCTGTACATGAGACACAAAATTCATATTCCATCAGGAACTTCATTACAATTTTCCAATAAAAGGAAATTCTTGATGTAAAGATGTTCTTTCTCTTCAACATTTCAATGAACCTTCCTCTTGTCTGTGCATGAAAAGTCCGT…
GmaAffx.54208.1.S1_at	BE824212	At4g31140	1e-24	Cell Structure			ACTTCATGTGGTGGTTTAGATATTCGTGGTAATATTTCTTATGCATTCAATAGCTACTTCCAAGTGAATGACCAGATTGACAGTGCATGCAAATTCCCTGGCCTTTCTGTTGTCACTGACAAAGATCCTTCAACTGGAGATTGCAAGTTCAAAATCATGATTCAGACAGATTCTGCTGGTCTACATGGGAATGGGAGAATTTGGTCTCTCAGAATAGTACTCTTTGTACTTTTGTTTTTCACTCTTATGT
GmaAffx.59853.1.S1_at	BQ612438	At5g36890	1e-152	Cell Structure			TAACTTGCCGTTACATGAGATGCTAGATGACAAACTGAGAGTTCGCTATTTCAAAGGATATCTTGCGTCAGTTGCTCAGGCTATAAAGGATGGAGCAGATGTAAGGGGATACTTTGCGTGGTCATTACTAGACAACTTTGAATGGGCTCAAGGTTATACAAAACGCTTTGGATTGGTCTATGTAGATTATAAAAATGGGCTCAGCAGGCACCCCAAGTCTTCTGCATATTGGTTTTCACGGTTTCTGAAAGCTGGTGAAAACAAGAAGGGTAAAGAAGAGTAGCTTACTTTCTTCATTATGTGTCTTTCCATACCAGATACAAGGAATAAAATAAAGTAAGCACAGAATTCCACCTTTATCAGTACTTGGAAGCTTTGTATGGGCTATAATGCCATTTC…
GmaAffx.74332.1.S1_at	AW348552	At4g10840	2e-61	Cell Structure			GAATTCTTGAACAGGAGTGTGGCCCNTGTCATCAGGATACTCTTGGGGTGTACAGCAANCTTGCAGCTACATATGATGCTATGGGAAGAGTGGGAGATGCGATTGAAATCTTAGAATATGTTCTCAAGCTGAGGGAGGAAAAGCTTGGGATAGCAAATCCTGATTTTGAAGATGAGAAGCGTCGTCTGGCNGAGCTTCTGAAAGAAGCAGGCAAGACACGGGACAGAAAAGCAAAATCTCTGGAAAACCTTATTGATCCTGGCTCAAAGCGGACGAAGAAGGAGGGGGCAAAGAGGTGGCCTGGTTTGGGGTTTAGAATTTAACCATAGTTTTATTCATTTAAATATATATATTGAATGCACATTCTGTAACATAGGATATCTTGTATAGGGTTGAATA…
GmaAffx.75793.2.S1_at	AI494968	At4g38710	5e-23	Cell Structure			ACAAAGGGCGGTGGTGAGTGCTTCTGCTTCATCATCATCAGAGAATGGCGGCTACTGTGTCTTCTGCTTGGTCAAAGCCCGGCGNGNGGGCCCTAGATTCCGAGGAACACGAAGCCGAGCTCCTTCAACAGAACAACAACAACCCCAACGACAAGCCACTCGCCGACTTCCCCTCCCTTGCCGCCGCCGCCGCCACCAAGCCCAAGAAGAAGAAGGCCCAGACCTACTCCCTCGCCGAATTCACCGCCAAGCCCGACTCCGCCTTCGCCGACCAAGATCCC
GmaAffx.85041.1.S1_at	AI938331	At5g59910	1e-42	Cell Structure	Histone		GTACACCCTGACATCGGTATTTCTAGCAAGGCCATGGGGATCATGAACAGCTTCATCAACGACATCTTCGAGAAGCTCGCGCAGGAAGCGGCGCGTCTCGCCAGGTACAACAAGAAGCCTACTATTACCTCCAGGGAGATTCAGACCGCGGTCAGGTTGGTGCTGCCCGGGGAGCTTGCCAAGCACGCCGTTTCTGAAGGAACCAAAGCCGTTACCAAGTTCACTAGCTCTTAGAGTTAGGGTTTTTTTTTTTTTTTTTTTTTTNCTGTAAAGCTAAGTCGTATAGCTAGTGGCTTCTTTTCGGATTCTATATGCCTATGAATTTGTGATTCTATTAGTCCC
GmaAffx.92070.1.S1_at	CF807049	At4g34050	1e-110	Cell Structure			TATGAATTGGGGTTGCCCGTGATTGAAAAGGCTGGA
GmaAffx.92828.1.S1_at	CF808553	At1g11580	2e-92	Cell Structure			ATAAACCGCTGTCGCATTGATGCCTTCCAAGACACTCTCTACGCTCACTCCAACAGGCAGTTCTACCGAGACTCTTTTATTACTGGCACTGTTGACTTTATATTTGGAAATGCAGCTGTTGTTTTCCAAAAGTGCGACTTGGTGGCCCGAAAGCCCATGGATAAACAGAACAACATGGTCACTGCCCAAGGACGAGAAGATCCAAACCAGAACACAGGAACTTCAATTCAACAATGTAACCTAACACCAAGTTCGGATCTTAAGCCTGTCGTGGGCTCCATCAAAACTTTTCTAGGGCGCCCATGGAAGAAGTACTCCAGAACTGTTGTGATGCAGTCGACATTGGACAGCCACATTGACCCAACAGGATGGGCTGAATGGGATGCCCAAAGTAAAGAC…
GmaAffx.93161.1.S1_s_at	CF808886	At5g09810	1e-86	Cell Structure			GCTGAGGACATTCAACCTCTTGTTGTTGATAATGGAACTGGAATGGTCAAGGCGGGTTTTGCAGGTGATGACGCTCCTAGGGCCGTGTTCCCCAGTATTATTGGGCGACCACGCCATACCGGTGTAATGGTTGGGATGGGTCAGAAGGATGCTTACGTGGGTGATGAAGCTCAATCAAAAAGGGGTATACTCACCTTGAAGTATCCTATAGAGCATGGCATAGTCAGCAACTGGGATGATATGGAGAAGATTTGGCATCACACATTTTACAATGAGCTTCGTGTTGCCCCTGAAGAACACCCTGTACTTCTTACCGAGGCACCCCTCAATCCCAAGGCCAACAGAGAGAAGATGACCCAAATTATGTTTGAGACTTTCAATGTGCCTGCCATGTATGTT…
GmaAffx.93438.1.S1_x_at	CF809163	At1g50010	5e-71	Cell Structure			CAACACCTTCTTCAGTGAAACTGGGGCNGGAAAGCACGTGCCNCGNGCGATTTTTGTAGATCTNGAGCCNACTGTGATTGATGANGTTAGGACTGGGACATACCGCCAACTATTNCATCCTGAGCAGCTCATTAGNGGAAAGGAGGATGCNGCAAACAACTTTGCCCGTGGCCACTATACCATTGGAAAGGAGATTGTTGANCTTTGCTTGGANCGCATCAGAAAGCTTGCTGACAACTGCACNGGTCTCCAAGGTTTTCTGGTTTTCAATGCTGTG
GmaAffx.9561.1.S1_x_at	BI974310	At5g65360	0.0005	Cell Structure	Histone		CAAACCGCTCGTAAGTCCACAGGAGGAAAGGCTCCTAGG
GmaAffx.2378.1.S1_at	BG652106	At3g54560	2e-30	Cell Structure	Histone		TAGTGTTAGTAAGTGTAGTAGGCCTTTGCTACTGTTTAAGAACAGATGTTGATGTTATTGTGTAAATGGTCATTCTATTGGCTTTTAACTTGCCTGTTGTGATACTCCTGGAATTGTAACGCTGTTGGATTTTA
GmaAffx.24396.1.A1_at	BU547464	At3g55260	1e-71	Cell Structure			ATAGTGCACAACTGGTTGGGCCCTGGTGTTTGTCCAAAGGTTGTCGCAAAAGGTTTCAGGTGCATTTACAGTAACCAGGGTGTCTGGTATCTTGACCATCTGGATGTACCTTGGGATGAGGTATATACAGCTGAGCCACTACAGGGAATACATACAGCTTCCGAACAAGAGCTTGTAATTGGAGGAGAAGTTTGCATGTGGGGTGAGACGGCTGATACATCCAATGTTCAGCAAACAATATGGCCTCGAGCTGCTGCAGCTGCAGAACGCTTATGGAGTCAGAGAGATTCTACCTCACAAAATATTACCTTAATAGCATTGCCCCGGTTGCAAAACTTCAGATGTCTATTGAATAGACGAGGGGTTCCAGCTGCTCCTGTCACAAATTATTATGCTAGA…
GmaAffx.29260.1.S1_at	BI471456	At4g12390	1e-49	Cell Structure			TATGCGTCAAGTCTCTGTTGGCCTACGCAAGCGTGATTCGCCGAAGCGACCGACAACTAGCCACGACCGCTCTGTCGGTAAGCATATCGAGGAGCCGATCCTCCGCATGGTTGGTGAAGAAGATGTTGAAAGCGAGAGGCATGAAGCCTAGAGAATACAGAGCGGTGCAAGACTGCGTGGAGAACATTGGTGACAGCGTGGACCGTCTCAGGCAATCGGTTACGGAGTTGGGGCGGACGGGCGAGGACTTCGTCTGGCACATGAGCAACGTCCAGACTTGGGTCAGCGCTGCCCTCACCGACGACAGCACTTGTCTTGACGGCTTCGCTGGTTCCGCCATGAACGGAAACGTGAAGGCTCTTATAANNGACAGGATTGTCCACGTTGCTCAAGTCACAA…
Gma.9025.1.S1_at	BQ612940	At2g05630	1e-57	Cell Structure			GAAATAATCCGTGACTGGTAACCATCTGAATAGTACTTCCTAAAATTGACCAATGTGAAGAAGTCAGCTTAATTGTAAATTCTCTGGTTTGATGCTTTTATGTAAAGTTTATTATGTCTANTGNAACTTATTTGAAAATTGTCGTGTTTCTATCAGTTCTAAATTGCATAAGTTTAAGGGTATGTTCTTTGTTCACACCGTTGATCCCTGACCTGCATGTCCGATTGGTGTCATACAATTTGTAGTTTACA
Gma.79.2.S1_at	AW310410	At4g13340	6e-05	Cell Structure			TTGTTTATAGTGCTATGGCCACGACAAGAGTGTT
Gma.7369.1.S1_s_at	CD399383	At5g59910	1e-41	Cell Structure	Histone		TTCACCCCGACATTGGTATTTCCAGCAAGGCCATGGGCATCATGAACAGCTTCATCAACGACATCTTCGAGAAGCTCGCCCAGGAAGCGTCGCGTTTGGCTCGCTACAACAAGAAGCCCACCATCACCTCGAGGGAGATCCAGACCGCCGTGCGTCTCGTGCTCCCTGGTGAATTGGCCAAACACGCCGTTTCTGAAGGGACCAAGGCGGTTACCAAGTTTACCAGCTCTTGAATTAGGGTTTGTTAGGCGGTTGTGTTGCAGATCTAGGGTTTTC
Gma.7351.1.S1_at	BU082673	At4g31340	2e-51	Cell Structure			GCTAGAGTGTTTTCAGCTGTTTTCTGTAGCAAAAAAGTGANTAAACCTGCTCGAAATGGAAACANTCACCATGCACGACGTAAACNTAAGCGAGGGCATCTAGACAAGCACACAACATGAAGTTGGTTCCTGCTTTATTTTTTTTCNTGGAAAGANNTTAGATAATTTTTCCTGTTCGCANGNGCTTATTGAGGGGNATNTATCTTTCCTGTCGTGTGGGGTTTNGAATATTTTACTTCTCTTTTTTTGGGTGAGGTAACTTTAGGATGTTTCACTGTAGAAAAGGGCACACANTATGTTTAGNTGTTNATGTATTATCANNNNNNNNCTNNGTTATATTTNNTTANNANNCCTTGCACTCCCTTTTCNCTGNTGGTTTTATTTTCTTAAATTCTTGAC…
Gma.6406.1.S1_at	CD394756	At5g09810	0	Cell Structure			TGAGTGGTGGTTCCACAATGTTCCCNGGNATTGCTGATAGGATGAGCAAGGAGATTACAGCATTGGCACCNNGTAGCATGAAAATTAAGGTTGTAGCACCACCAGAGAGGAAGTACAGTGTCTGGATTGGAGGCTCNATCTTGGCNTCCCTCAGCACCTTCCAACAGATGTGGATTGCGAAGGCAGAGTATGATGAATCTGGACCATCAATCGTACACAGGAAATGCTTCTAAGTTATAANNATGGAGTNTGAAAGNTGGACCAGGGAAATTACTATTTATACNAANACTACAAAAATACCATCNAGTGGTTGAGGAACTTTCATTTNCCTACNCTTTACCATNCCTTTTATCTATCTTGTTTTTGTGTTTTCCTTTCTTTGNTATGTTGAGATAAGAG…
Gma.6302.1.S1_at	BI786195	At2g44450	1e-142	Cell Structure			GATCCAACCCTTTCCGTGGAAGAAGCTCTCATGGATATTTATCGAATTGATTATTATTATCGTCATTTCTTTTATCTTCGATCAGCAATTAAGGCTGGCGCAAACGTTAAGGGATTTTTTGCATGGTCATTTTTGGACTGTAATGAATGGTTTGCAGGGTTCACTGTTCGGTTTGGATTAAACTTTGTAGATTACAAAGATGGCTTAAAAAGGTACCCTAAGCTTTCTGCTCAATGGTACAAGAACTTTCTGAAAAGAAACTAGTGTTAGACCCACCGTTTGAAAGCTATGCAGCACCTAAAAACGGTTAGGTTAAGCTCAATGTTTGTAGTTGTAGCTAATTCCACGTATAAGTCATTAGGTTGTTGTTTTCTGTTAGAATAATTTCATGGCACACTA…
Gma.6199.1.S1_at	BQ612015	At5g66920	0	Cell Structure			TTGACGGTTATGACTTTTGGGTCGTGGGTTATGGTTTTGGTCAGTGGACACCAGCCAAAAGAAGAACCTATAATCTAGTTGATGCTCTGACCAGGCACACTACACAGGTATACCCAAATGCTTGGACTACAATATTGGTGTCCTTGGACAATCAAGGTATGTGGAATCTGAGGTCTGCAATATGGGAAAGGCAGTATCTTGGGCAACAATTATATCTCAGGGTTTGGACTTCTGAGCGCAGCCTTGCTAATGAATATGATATTCCCAACAATGCATTGCTTTGTGGCAAAGCTGTTGGACATAACAACCCCTAGTATCACTATCAACACCAACTAATCATATTGTGCCGTTTTCTAGTCATGAGGGTTTGACTAAAATTGGAAGAGTTGGAGAGAATTT…
Gma.6283.1.A1_at	CD397881	At5g65360	1e-70	Cell Structure	Histone		GAAGCAACTCGCCACGAAAGCAGCACGCAAGTCCGCTCCGGCGACCGGCGGCGTGAAGAAGCCACACCGTTTCAGGCCGGGTACGGTGGCGCTGAGGGAGATCCGAAAATACCAGAAGAGCACCGAGCTTCTCATAAGGAAGCTTCCTTTCCAGAGACTCGTAAGGGAAATCGCTCAGGACTTCAAGACCGATCTCCGCTTCCAGAGCAGCGCTGTCTCCGCTCTGCAGGAAGCCGCGGAGGCCTACCTTGTTGGGCTGTTCGAGGACACCAACCTCTGCGCCATTCACGCCAAGAGAGTTACCATTATGCCCAAGGACATTCAGCTTGCTCGTAGGATTAGGGGCGAGAGGGCTTAGGGTTTGTTCGTGTGATGTACAAAGCTGTAGTACTTTCTTAG…
Gma.5949.1.A1_at	CD412339	At5g65360	5e-65	Cell Structure	Histone		CTTGGTAGGGTTGTTTGAGGACACTAATCTCTGTGCCATTCACGCCAAGCGCGTCACCATCATGCCGAAGGATATTCAGCTTGCGCGGAGAATTAGAGGCGAGAGGGCTTGAGGATTTTTTAATGATTTGTCACTGCTAGGATACGTTAAAACTGGATCTGGTTTATGTAGTTTGTGGTTTTGGTGTATTTATTCGACCGTAAGGGTTGTGGTTGTTAGTATGAAGATGNAGAGTTAACATTATCTGGCTAATTAGTTGGTTAATGTTTACTTTGAATTTGCTG
Gma.5989.1.S1_at	CD399531	At2g17390	1e-114	Cell Structure			TAAGAATAAGAACACTGCTCTCCATTATGCAGCTGGTTATGGCAGAAAGGAATGTGTGGCCCTTCTCCTTGAAAATGGTGCTGCAGTTACTCTCCAGAATATGGATGGTAAAACTCCAATNGATGTTGCGAAGCTAAACAATCAAAATGAAGTCCTNAAGCTACTTGAGAAAGATGCTTTTCTGTANTTGNAATGCATGATGCCATGCTGTCACCAACAAG
Gma.6150.2.S1_s_at	CD416056	At5g59880	6e-60	Cell Structure			TGCAAGCAACTGATCCTACTGAGATGGGTCTTGATGTGTTCAAAAGCCG
Gma.6150.2.S1_x_at	CD416056	At5g59880	6e-60	Cell Structure			GGGAGCTGGATGGAATTCAAGTAGAGNTGCAAGCAACTGATCCTACTGAGATGGGTCTTGATGTGTTCAAAAGCCGNGCCAACTAAAATGATTATANAAAATAGTAGGCTTTCTGGTGGGAGCAGCACNCCTNAAGCCTTAGTTACTCATNNGGAAAATATCCTAGTTTGTGGGATGGTCAACTTGGGTAGTTATGGTCCCAAACTCTCNNAATTTTCCAAGTTGTGGCATAAANTTCTATTGCACCTTTTNACAAGCTTTGCTTGTTCCAGTGTGTTTTATTATGATTTGTGATTTATACAACCTTNGCGTTTGAGTGCCANNNNANNNNNNNNANNNCNNANNANNNGAATNNNTAACTGTTTNGTGTTATCAGACAAAAAATGGGGNTTCTTCACT…
Gma.5683.2.S1_at	CA935387	At1g11840	1e-139	Cell Structure			TGTCACTGAATACACCAAGGGAAATGCTTATGCACAGGTTGCTATTGGTACTGATGATGTATACAAGAGTGCTGAGGTTGTCAACATAGTCACACAAGAGCTTGGAGGGAAGATTACTCGGCAACCAGGACCANTTCCTGGCCTTAACACAAAGATCACTGCTTTCTTAGATCCTGATGGATGGAAAACTGTTTTGGTTGACAATCAAGATTTTCTGAAGGAGCTGGAGTAAAGAGTTATGGCTTTTTAATTTAAAGTACTAGTGCTATTGTATGAATAAGTGATCAGCTCCTGTATTTATCAGTGAAGTAGTAGTGTTCAATACGGTTTCTCTGATGTGTTTGCCTGTTTGGTTGAGATTCTAGACAGTCTAC
Gma.5793.2.S1_x_at	CD393846	At1g06760	2e-13	Cell Structure	Histone		ACCGACTAAGTCTGCTCCTGTTAAAGCCGCTGCTGCTCCCAAGAAGCCCACCAAAGCTGCGGCTAAGCCCGCCGCCAAGCCCGCTTCCAAGCCCAAAGCTGCTGCACCTAAGAAGAAGGCTGTTGCCAAGCCCAAGGCCAAAGCTGCGGCCACCAAGCCCAAGGCCAAGCCCGCTAAGGCCGCGCCGAAGAAGGTCGCCGCTAAGCCTGCGAAGAAGACTCCCGTAAAGGCCGTGAAGAAGCCCAAGAGCGTCGTGAAGAAACCTAAAAGCGTGAAATCTCCAGCGAAAAAGGCCAAGGCTAAGAAGTGAGGGATTGGAGTGGGTTTTAGTTTGGCGTTATAGTGTTTATGTATTTCGGGTTGAATCGTAGTATAGGT
Gma.5833.3.S1_at	BI469020	At2g18050	5e-26	Cell Structure	Histone		TGAAGGAGAGCACCGCCAAAGCGACGAAGGAATCGCGTCCGAAACGAAACAAAATCGCAACCGCCGTTGCTCCGAAGAAAACCGAGGCGGTTAAAAAGCCCGCGAAGAAGGTCGGGCCGAAGAAAACGAAGAAAGTGTCGACGCCTGCGNNNCCCAAGCAGCCCAGGTCCATTAGGTCTCCGACCAAGAGGGCCCGTAAAGCTGCCGTCGCTGCGGCTTGATGTTTGATGTTTTTCTTGTTTAGTTAAAACTCTGGCATATAATATATGTAGATATGAAAAGGTGTGTGTTANCCTTGTTGCACAATCTTGAATATAGTTGTGTGGTTTAGGATCGTAGATAGTTTAGTGTTCTGCAATGTTCGCTCTAAGAAGTGATCAATTGGAGATGAATTTTACT…
Gma.5502.1.S1_at	CD417859	At5g44340	0	Cell Structure			GTCCAGCGTGTGTGATATCCCACCTAAGGGTCTTAAAATGGCATCCACTTTTATTGGTAACTCGACNTCAATCCAGGAGATGTTCAGGAGAGTNAGTGAGCAGTTCACGGCNATGTTCAGGCGCAAGGCTTTCTTGCACTGGTACACCGGGGAAGGAATGGANGAAATGGAATTCACCGAGGCNGAGAGTAACATGAACGATCTTGTTGCTGAGTATCAGC
Gma.5449.1.S1_at	BG511648	At2g30620	1e-16	Cell Structure	Histone		CAGCGAAGAAAGTAGCGCCTGCTAAGAAAGCGCCAGTGAAGAGTGTGAAACCAAAGAGTGTAAAGTCTCCAGCGAAAAAGGCTACGGCTAAGAGAGGGGGTAGGAAGTGAGAATGTGGTGGGTAGAGTGGTTTTAGGGTTAGTTTTGTGAAGTTCTTTGTCCTCTTGGTGGTGTAGTTGGGGTTACAGATGATCCTATAATATATGAAATCTGATTTTATGAAACCTTTGTTTTTTTTTTCTTTTATTTAGTTTGAATTTTTTCTTTGGTTCGACCTTAGGGAGTAGATTAAAAAAAGCTTCTAGCTCTGCTTTTCAGCTAAATGAGTTAATCATAAAATGTATCTTATAGAGTATGAGGTTTCTCTGCGTTATAGTACCTTTGATGGATCAATGTAGT…
Gma.5323.1.A1_s_at	CD402653	At5g59970	1e-37	Cell Structure			ACGGATTTGGCGGTTAGACAATTGGGGATTTCNGCACTGCGTCCTCGATTAGNGTTTCTTATAGTGTCAATTTCGATGTTTATATCCTGCAATAGTTCTTTAGCTGTAGCTTGAGGTTTAGCAACTGCTCTTGTTTCGCTTTGGGTTGTAGCTATGAGA
Gma.4491.1.S1_at	BI967493	At2g20520	1e-56	Cell Structure			GGTGCTGTTGCCGTTGGAGCTCTTTGGAACCACCAAGACCACTCATTCTTCTGAGGCTCCTTCTCCTAAGGGTTCTAAGAGTACTCCTGAGATTCCCAGCGTGGGTAAGGCTGGTGGCGCTCCTTCTCCTCATGGTGATAAGAAGGATACTAATGCTGCCAATGGGAGGAATGTGGCTTTTGGACTTGTCGTTGGACTTGCCTTGATTTGCATAGAAGCTCTCCATTGATCATCAGATAACTTGTGTCTCGTGTTTTTCATCTTTTTCTTTTACTCTCCATCACTTCATTTGT
Gma.4424.1.S1_at	BG237912	At1g11840	1e-130	Cell Structure			TGATAAGCCTGAGTACAAGTACACTATAGCTATGCTCGGGTATGGAGAGGAGCACGAGACAACTGTGTTGGAGTTGACATATAACTATGGTGTGACTGAATACTCTAAGGGAAATGCTTATGCACAGATTGCCATTGGTACTGATGATGTATATAAGAGTGCTGAGGTAGTTAACCAAGTCATAAAAGAGGTTGGAGGGAAGATTACTCGGCAACCAGGGCCAATTCCTGGCCTTAATACAAAAACCACTTCGTTTTTAGATCCAGATGGATGGAAAACTGTCTTGGTTGACAACGTTGATTTCTTGGAAGAAC
Gma.4466.1.S1_at	BQ629041	At5g48160	5e-81	Cell Structure			GTCAATCTAATGAGTGCCACCCTTTCAGAACAAACCCATGAGTACTGGTTCAGTGTATGTTATAATCTTTTACATATTATAGCAATGTTATTCTGTTGCACAATTGATGAAGAGTTAGTCTAATTCCATTAGGTTCAAGACAATGTAAGCCTTTTGTAGATCAAAGAGGTACTAGTAAGTAAAGGCTTAACTCAGTTTGAAATTTGGTTTGTTCTATGCGGTAT
Gma.4185.1.S1_at	BQ742395	At4g17030	3e-58	Cell Structure			AAAGGGTTCCATGCACATACACCGGCAATGTCTTGTTCCACATCAAGGAAACTAGCACCAACCCTGGTTACTTTGCTTTGGTCATTCTCAATGTAAATGGAATACACGACGTCACTGCTGTTGAATTGTATCAGATGGGACAATGGAAGTCACTTAACAGGAACTATGGAGCAGTGTTTGACTTTCCTAACCCACCAAGTGGCGAAATCCGGTTAAGGTTTAGGGTGAGTGGCATGTCTGATTGGGTGGACCCCATGATTGTCATACCCAGTAACTGGCAGCCTGGAAATACTTATGCCACCAAGGTTCAGCTTAAATAGAAAGAATCCCAGGAACAGATTACAAATAATAGGCACTAGAGTATATTCAGTTTGTTTCTTATATGGTGTCACTCAATGT…
Gma.3604.1.S1_at	AW349604	At4g34050	1e-102	Cell Structure			TACTTCACCTGCCACATATGGAAAAAACACAACCTTCTACTATTTTACCTAATCCTTAAATAAACATAATGTGTGTCTGCTTGGATAGTTACTCTGTTGTTGAGTTTTA
Gma.3917.1.S1_at	BE658782	At4g19420	1e-158	Cell Structure			GAGAAGTGACTCTCCAGAGCTGAAAAAGACAACAATTGCAAAGGCTGTAGCAGATTGGTTTTATGAAAGAAGGCCTTTCCATCAGATAGATTGCCCTTACCCTTGCAACCCCACTTGTCACAACCGTGTTTTCGATCCACAAGACGACCATCCAGGAGTATAGAAATATTCATTTCATCAAAATCTAGCACACATTTATTTCTATCATTTTTATAAAAACCACACACACTTATTAGTTATTGGTTAGCATGGGATTGAATAAGAAAATATGATCTCCAATTTTATTATTAGGCCACCAAAATTACAAGGAAATGCCGCCACTGCACTAAACTTAATTGTGTGCCGGGCGCACCTCCATCATTGTTTAGTA
Gma.3064.1.S1_at	CD403129	At5g65360	1e-70	Cell Structure	Histone		AATCCCGTTGTATTTTTCTCAGATGGCTCGAACGAAGCAAACGGCCCGCAAGTCCACCGGCGGCAAGGCGCCGCGGAAGCAGCTGGCGACTAAGGCGGCTCGCAAGTCGGCTCCGGCGACCGGCGGCGTGAAGAAGCCGCACAGATTCAGGCCGGGAACCGTGGCGCTGCGCGAGATCCGGAAGTATCAGAAGAGCACGGAGCTACTCATCCGGAAGCTTCCGTTCCAGCGCTTGGTCCGCGAGATCGCGCAGGACTTCAAGACCGACCTCCGGTTCCAGAGCTCCGCCGTCTCCGCGCTCCAGGAGGCCGCCGAGGCTTACTTGGTCGGTCTCTTCGAAGACACGAACCTCTGCGCCATTCATGCCAAGCGTGTTACTATCATGCCCAAGGACATTCA…
Gma.2240.1.S1_at	AW311147	At5g13870	1e-142	Cell Structure			TCACATCGACGGGTGCGAGGCTTCGGTGAACGCCAAGTTCTGCGACACGCAGGGCAAGAGGTGGTGGGACCAGCCTGAGTTCCGTGACCTTGACGCCGCCCAGTGGCGTAGGCTCAGATGGGTGCGCCAGAAATACACCATCTACAACTACTGCACTGACACTAAACGCTATCCTCATATCTCTCCTCCTGAGTGCAAAAGAGACCGTGACATTTAAATTTCGAGTGAATAGATATTTTAGTCCGTGATATTTAAATTTCTCATTCACTTTATTATTGTTGCTTCTCTTTTCATTTTTATCACCCTGCCACACATTCACATTTCCACTTCCTATGTACAA
Gma.2338.1.S1_s_at	CD409383	At5g10980	3e-71	Cell Structure	Histone		GTTAGAATGCTTCTGTTTTAGTTTTTACCTGCGGGATGTTGCAGCCACTTTAGAAACTGTATTGGACAAC
Gma.2338.3.S1_at	BI426604	At5g10980	5e-66	Cell Structure	Histone		GATTCGCGGTGAACGTGCTTGAGGTGGTGGTTGTGAAGATGAAGATGAAGATGGGTTGCTGCGGGTGGTGTTTTTGTTGTTCAGATTCCTTTTTTTTTTTTTTTNNCAATGGATAGGGTTGTTAGGGAGTGTAGGTGTTTTACGGTATTACCCATTAATTGTGATACAGGCAAATACTGCCAAGTGTCCGTGACTGTGTTTTCTTCCTTTTAGAAAATTGGCTTGTAATTGATTTTTGGACATGTGTGTCATAATGTTTCTGTTTTTAGTTTTTACCTACGGGATGTAGTCACTTTGGAATTGTATTGGACAACATTCAGTTGCCATCTAATCTCGTTTAAGCTAAGTTTGTTGTGCTAATTAA
Gma.2464.1.S1_a_at	BG839541	At5g15650	0	Cell Structure			GGAGCATCAGTGGCCAATGGCAAAGCGTGAATCGGTTTTTGGTTAACTGCATAACAGCCACANAACTTGGAANTGGAACTATTTATATACTGTATTTTTTTTCCTTAGTATTTATCTTCAACTTAGCTGTTATTCTCGGCTTAAAATTTGCAGCATTGTTAGCTGTAATTCTGTTTAATAACTTCATCATTTGAGCTTAGAAACAATAAGTACACCCGTAGGGCGTTACTTTCTTTTTATTATTGTTTGATGGGTAGAGATCACATGGCAGCATTTCGTTACATGTGAAATAA
Gma.2470.1.S1_s_at	AI442629	At1g09560	3e-63	Cell Structure			AAAGTCTGGCTTTTGGTCCTTTGATTCCCAACTTCACTTGTCACATATCATATTATGAAGCTCACAGGTTTCCTGCAAGCGGTGACTCTTGCTTTGGTGTTAGCCACCGTCTCTGCATCAGATCCTGATCCTCTTCAAGACCTCTGTGTCGCAGACCTTGCTTCAGCGGTTAAAGTGAATGGATTCACATGCAAAGATGCTGCCAAGGTAAATGCGAGTGATTTCTTCTCAGACATACTAGCCAAACCAGGTGCCACAAACAACACCTATGGCTCCCTAGTGACTGGAGCCAACGTTCAGAAAATCCCAGGACTCAACACCCTTGGCGTGTCTTTATCACGCATTGACTATGCCCCAGGTGGCATCAACCCACCTCACACGCACCCACGTGCCACCGAG…
Gma.2623.1.S1_at	CD414993	At1g07790	1e-41	Cell Structure	Histone		TTCACCCCGACATCGGAATCTCAAGCAAGGCCATGGGGATCATGAACAGTTTCATAAACGACATCTTCGAGAAGCTCGCCCAGGAGTCGTCGCGATTGGCTAGGTATAACAAGAAGCCTACCATTACTTCCAGGGAGATCCAAACGGCGGTGCGTTTGGTCCTCCCTGGGGAGTTGGCCAAACACGCTGTCTCTGAAGGTACCAAGGCCGTCACCAAGTTCACCAGCTCTTGATTNGTTTTGTTTCCTGTGTTTCGATTAGGGTTTTCTGTTGACCCCGATTTGATTCGCATTTTTAAATTAGGGTTTTATTTTCCTTTTTGTTGCTTTTGAGGGTGTAGAT
Gma.2798.1.S1_at	CD417686	At5g59970	5e-35	Cell Structure			CACCGTAAGGTGTTGCGCGATAACATTCAGGGAATCACCAAGCCTGCGATTCGGCGTTTGGCTCGCAGGGGTGGTGTGAAGCGTATCAGTGGTCTCATCTACGAGGAGACACGTGGCGTGCTCAAGATCTTTCTGGAGAACGTGATTCGTGACGCCGTTACCTACACTGAGCACGCTAGGAGAAAGACCGTTACGGCAATGGATGTGGTTTATGCTCTCAAGAGNNCAAGGAAGAACCCTCTACGGATTTGGAGGCTAGTTTNNNNNNNNNNNNNNTTTTTTTNAATTTTTATTGTTAGGTTTCGTTTGTTTTGGAGGTTTATGTGGGATGTAAGAGACCCTTGCTATTAGGGAGATAGGGAAAAAAATTGCAAGGATTTGGTGTAGTAAGTTGCTGGT…
Gma.2801.1.S1_at	BI785739	At3g18080	0	Cell Structure			GGAAACCCAACTGTTATCTTATCTGAAAATGGCATGGATGATCCGGGTAATGTGACTCTTCCCAAGGGTTTGCATGACACCACAAGGATAAACTATTACAAAGGCTATTTGACTCAACTAAAGAANGCAGTTGATGATGGAGCNAATGTGGTTGGNTACTTTGCATGGTCATTGCTGGATAACTTTGAATGGAGGTTGGGTTACACATCAAGGTTTGGCATTGTCTATGTTGATTTCAAAACCCTCAAGAGATACCCCAAGATGTCGGCATACTGGTTCAAGCAACTCATTACCAAAAAG
Gma.17619.1.S1_at	CD405083	At5g54640	3e-42	Cell Structure	Histone		CCGTCGGTCGTATCGCCAGGTTCCTCAAGGCCGGAAAGTACGCCGAGCGCGTCGGCGCCGGAGCCCCCGTCTACCTCGCCGCCGTTCTCGAATATCTCGCTGCTGAGGTTTTGGAATTGGCTGGAAACGCTGCGAGAGATAACAAGAAGACTCGAATTGTTCCACGCCACATCCAATTGGCGGTGAGGAACGACGAAGAGTTGAGCAAGCTTCTAGGAGATGTTACCATTGCTAACGGCGGTGTTATGCCTAACATTCACAACCTTCTTCTTCCCAAGAAGGCTGGGGGCTCATCCAAGGGTGCNGCTGCTGACGATGACTCTTAAATAGGGATTCACTGTTCACAAAGTTCTTGAATTTAGATTCTATGTTTGCTCTNCTTTTTTTTTTCCTTTTTAT…
Gma.17625.1.S1_a_at	BI971077	At4g14960	1e-60	Cell Structure			GTGCCTAAAGATGTTAATGCAGCTGTTGGAATTATCAAGACCAAGCGCACTATTCAATTTGTTGACTGGGCCCCACCGGGTTCAAGTGTGGAATCAATTACCAGCCTCCGACTGTTGTTCCAGGTGGTGATCTTGCCAAGGTTCAGAGGGCCGTGTGCATGATCTCCAATTCCACCAGTGTTGTTGAGGTCTTCTCTCGCATCGACCACAAATTTGACCTCATGTAT
Gma.17861.1.S1_at	AW310110	At1g09560	3e-84	Cell Structure			ACACAGTCCATTGCTCTAACGTTGTTTGCAGCGACGCCACCGGTTCCAGACAATGTGTTAACCAAGGCGTTCCAGGTGGGTACCAAGGAGGTTGAGAAAATTAAGTCTAGGCTTGCTCCTAAGAAATAATTAATACTAATGTGGGATGTGGTTGTAATGTCTCTCTCATTGTTCTTACTTCTTACACCTTCCTCTCTTGTCCTTGTTCTTGTTGCTTTACAATTCATGTTTGTTGGGAACTCATAAATTCAAAGATTTGGAATGAGAGTANAAAANNNANNANANNCATTTCTTTGATGATTGGAATTTGAAATTAGATGCTTGCTTCCTTGCATGCTTCTTCGTTTTGTTAATTAAATGCGCTATTAGTGGTTCTGTCCTGTGTTGACTTCTTAA
Gma.17868.1.S1_at	BM270176	At5g62700	0	Cell Structure			GAACGATCTCGTGTCGGAGTATCAGCAGTACCAGGATGCCACTGCTGATGAGGATGAGTATGAAGAGGAAGAGGAGGAGGAGGAGTTTGCCCAACATGATATGTGAATTTGAACTTGGGTGTGGTGTANNGNGGTGGCTTTAGACAAGAAGATGGATAACAAGCTGCAACTTCCTGTTGCCGGTTGATGATTGTCTCTTTTGAGGGGATGGTTTTGTTCCGGCTAGATCTAGTTTCTATTACTGTTCTATAAAACTGATTCTGGTTTGTTTCCGTTTTTATGTATAACCTGTTGGTAGGGAAGAC
Gma.17868.2.A1_s_at	BQ253153	At5g62700	3e-36	Cell Structure			AACGATCTTGTGTCAGAGTATCAACAGTACCAGGATGCCACTGCTGATGAGGATGAGTATGAGGAGGAAGAGGAGGAGGAGGAGTATGGCCAACATGATATGTGATTTTGAACTTGGTAATGTATTGCGGTGGCTTGAAGATGTATAACATGCCGCAACTTCCTGTTGCCGGTTGATTGTCTCTTTTGAGGGGATGGTTCTGTTCCGGCTAGATCTAGTTTCCATTACTGTTCTATAAAACTGGTTCTGTTTGTTTCCGTTTTTATGTAACCTGTTGTTTGTAGGGAAGA
Gma.17926.1.S1_a_at	CD401821	At3g62830	0	Cell Structure			GACCCTGATGCTAGGATAGAGTACAGGCCCAACACAGAGGATGACCCGCACAAGAGAAAGCCTGATATAAGTAGGGCTAAGGATCAACTTGGCTGGGAACCCAAGGTTGACCTGCGCAAGGGCCTCCCACTAATGGTTTCTGACTTCCGGCAACGCATTTTTGGTGACCAGAAGGAAAAGGCATCCGTAGCCTAATTCTAGCATGTCATGTATCTTAGAGCCAGAAAGAGAAAAAATAATAGTTCGAGGATAACCCTGGCCCG
Gma.17982.1.S1_at	AW185083	At5g07720	1e-108	Cell Structure			CTCAGTAGCATGGAGAGGGCTTTCAATTTTGCTGATAATCAGGTGCTCAAGCTCTATGGGTTCAGGCACCGTGGTCTCTTGAGTCCTAAGATCAAGAGGATCAGAAATGAGACAGTTAGTCCTTTGGAGTTTGTAGACCAGTTTGATATTCGAAGACATTCTACAGAAAACACGNNNANCAAAGAGCTAGTGAGAAAGTTGTTGTTCAATGGGTGGTATTATAGAGAGTAATTATTTAGAAGTGGAGTTTCATTTGGGGACAGTTCACATGTAACTTTTGCTTCTTCTGTCGTCTTGGTACTTCTGTGAGAATTTTAGGATAGAATTCTTTCGTAAGTTCTTCTTTCTTCCAGATTTGAGCAATCAGCAAACAAATTTTATTTACTCATCTACTGTATA…
Gma.1913.1.S1_at	BI970928	At3g12110	0	Cell Structure			GAGGAACAACCATGTTCCCTGGTATTGCTGACAGAATGAGCAAGGAAATTTCNGCATTGGCACCCAGCAGCATGAAGATCAAGGTTGTAGCACCACCTGAGAGAAAATACAGTGTCTGGATCGGTGGTTCTATCTTGGCATCTCTTAGCACCTTCCAGCAGATGTGGATTGCAAAGGCAGAATATGACGAATCTGGTCCATCAATTGTGCACAGAAAGTGCTTCTAAACTGTTTCGATAGATAGGGTTATTGAAGGGAAAGACTACTATCATCACGATTTGTCTGGAAGCAATGCATTGCAGATTGTAACCCTTTGATTCTAGCTTTTGTTATCCTTTCATTTTATTCTCTTGTTGGAGTGATCATTTATTTGCAGAAGGTG
Gma.1975.1.S1_a_at	CD418592	At1g07790	2e-46	Cell Structure	Histone		CACCCTGACATTGGTATCTCAAGCAAGGCCATGGGAATCATGAACAGCTTCATCAACGACATCTTCGAGAAGCTTGCCCAGGAATCTTCTAGACTTGCCCG
Gma.1975.1.S1_s_at	CD418592	At1g07790	2e-46	Cell Structure	Histone		CACTAGCTCTTGAACTGACTATTATGCCCCTTCGCTTCGATCTAGGTGTCTCTGTTAGGAATATGTTTTATGTTGAAGTGTTGGTTTATTTTTTCTTTTTGGTGAAAGCAATTTGTAAGTGAAGAATATGGGATTTGTTGATCCTTCTTTGTATGGAATTAGTTGCTAATACAGAGACG
Gma.1975.4.S1_at	CD403154	At1g07790	1e-46	Cell Structure	Histone		GAACAAAATATCTTTGCCTGGCTCTTGTTTTTCTTCATGTGTTTCTGTTAGATCTAGCGACCTATGCTTAGATTTGAACAGTTAACTT
Gma.1975.4.S1_x_at	CD403154	At1g07790	1e-46	Cell Structure	Histone		ATCGTGATGGCACCAAAGGCAGAGAAGAAGCCAGCAGAGAAGAAGCCCGCGGAGGAGAAGAAATCGACGGTGGGAGACAAGGCTCCGGCGGAGAAGAAGCCAAAGGCCGGAAAGAAGCTTCCGAAGGAGGGAGGCGCCGGCGGAGAAGGGAAGAAGAAGAAGAGAAACAAGAAGAGCGTGGAGACATACAAGATCTACATCTTCAAGGTTCTGAAGCAGGTTCACCCTGACATTGGTATCTCAAGCAAGGCCATGGGAATCATGAACAGCTTCATCAACGACATCTTCGAGAAGCTTGCCCAGGAATCTTCTAGACTTGCCCGCTACAACAAGAAACCCACCATCACTTCNAGGGAAATTCAGACCGCGGTCAGGCTTGTGCTGCCCGGTGAATTGGCC…
Gma.2190.1.S1_a_at	CD390492	At3g02230	0	Cell Structure			GCTTGGGAGTGAAGACTGGCCTTCCATACATCTGGCACAGCAAAGCAAGCAACCCTTTTGTCAATCTCAAAAAGGAGTACAAGGGCATCTTCTGGCAAGAAGAAATCATTCCATTCTTCCAAAGTGCCACTCTTTCAAAAGAGTGCACGTCTGTCCAAAAATGTTACATTGAACTCTCCAAGCAAGTCAAGGAGAAGCTTGGGGCTGTTGATCCCTACT
Gma.2190.1.S1_x_at	CD390492	At3g02230	0	Cell Structure			GGGAGTGAAGACTGGCCTTCCATACATCTGGCACAGCAAAGCAAGCAACCCTTTTGTCAATCTCAAAAAGGAGTACAAGGGCATCTTCTGGCAAGAAGAAATCATTCCATTCTTCCAAAGTGCCACTCTTTCAAAAGAGTGCACGTCTGTCCAAAAATGTTACATTGAACTCTCCAAGCAAGTCAAGGAGAAGCTTGGGGCTGTTGATCCCTACTTCATCAAGCTAGCAGATGCCATGGTTACTTGGATTGAAGCTTGGGATGAGCTTAACAACAACACATCTGAAGAAGTTCCTTCAAAGCCAACCAATGGTGCTGCTG
Gma.14873.1.S1_at	CD487575	At5g59970	2e-40	Cell Structure			ATTCAGGGCATAACGAAGCCCGCAATTCGCCGTCTCGCGAGACGTGGCGGCGTGAAGCGTATCAGTGGTCTCATCTACGAAGAAACCCGCGGTGTTCTCAAGATCTTCCTCGAGAACGTCATTCGCGACGCTGTCACCTACACTGAGCACGCTCGCCGCAAGACCGTCACTGCCATGGACGTTGTTTACGCCCTCAAGAGGCAGGGCAGGACCCTCTACGGTTTCGGCGGTTAGAGAATTACCGATTTCTGCATTGCGTCGTGGATTAGGGTTTCTTATAGTGTCAGTCAATTTCGCTGTTGATATTATGCAACGGTTCTTTAGCTGTAGCTTGAGATTTAACGATTGTTCTTTGAGTCGTAGTTATG
Gma.12446.1.A1_at	CD411372	At5g59970	9e-37	Cell Structure			TCGCAGAGGTGGTGTTAAGAGAATCAGTGGTCTCATCTACGAGGAGACACGTGGCGTCCTCAAGATNTTCCTCGAGAACGTTATTCGCGACGCTGTTACCTACACCGAGCACGCTAGAAGAAAGACCGTTACCGCTATGGATGTTGTTTATGCTCTCAAGAGGCAGGGCAGGACTCTCTACGGTTTCGGTGGTTAATTTCTAGGGTTTCCATCGGCGTAGCAGCTGCTTATTGGTTATTGTTGTAAATGGTTGCTTTTTAGGCTTCTTGTTATATTTGCTTCAATTGTAATGGAACNNAAGAGTATTTTGTTTCTGGTATTTGAATCTTAATGGTTGAAGTTCTCTTAATTGTCATGGTTACTCTGATTATCTGCTAGTTAATTGCG
Gma.12995.1.S1_at	BU763539	At5g59970	5e-37	Cell Structure			GCGACAATATCCAGGGAATCACGAAGCCCGCGATTCGGAGACTGGCGAGAAGAGGTGGCGTGAAGAGAATCAGTGGTTTGATCTACGAAGAGACCAGGGGCGTGCTCAAGATCTTTCTCGAGAACGTGATTCGCGATGCCGTGACGTACACGGAGCACGCTAGGAGNAAGACAGTGACGGCCATGGATGTCGTTTACGCTCTCAAGAGGCAGGGAAGGACTCTCTATGGTTTCGGAGGCTGAGGGTTTGGCCTTCTTTGGTGGCTTTGGTTTGTGTAAATGGAAGGAATTTGTGTTTTGTAGTGATTATATATGTACTTGGATTATCTTCTGCTCGGTACATGCTCAAGGTTCTTCTGTTTTTTTTTTTTNAATTCTACTAGTAATTGCATCCTAATTG…
Gma.13325.1.S1_at	CD410143	At1g50010	0	Cell Structure			CAAGGATGTGAATGCTGCTGTGGCCACCATCAAGACCAAGAGAACCATCCAGTTTGTGGATTGGTGCCCCACTGGGTTCAAGTGTGGTATAAACTATCAGCCTCCTACTGTTGTTCCTGGAGGTGACCTTGCCAAGGTGCAGAGGGCTGTGTGCATGATTTCGAACTCCACTAGTGTGGCTGAAGTGTTCTCCAGGATTGATCATAAGTTTGACCTCATGTATGCGAAGAGGGCCTTCGTGCACTGGTATGTGGGTGAAGGTATGGAAGAGGGTGAGTTCTCAGAGGCTCGTGAGGACCTTGCTGCTCTTGAGAAGGATTATGAGGAGGTTGGTGCCGAGTCTGGTGATGGAGATGATGATGGTGAAGGAGATGATGATTATTAGAGTGTCTGAAATAT…
Gma.13580.1.S1_s_at	BQ611050	At5g19780	0	Cell Structure			CAATGTAATTGTTTCGAGTAAAAAGGGTATATGCTTCGTTACATTACCCTGAACCAGTATTGTTCGTTCCTTTTTGTTTTTACTCCTGTGTGATATAGTTCTCCATTATTCAAACTGTGAAGTGATATCATCATTATGCTTCTATTTTGGTGGTTTAGGACCTGTTGTTTGCGACCTCTGTCATGTTTTCAGAATTGTCCAT
Gma.13580.2.S1_a_at	AW780839	At5g19780	0	Cell Structure			AGGACTGTTCAGTTTGTTGATTGGTGTCCAACTGGATTCAAGTGTGGTATCAACTACCAGCCACCTTCTGTTGTTCCTGGTGGTGACCTTGCTAAGGTTCAGCGTGCTGTATGCATGATCAGCAACAACACCGCAGTTGCTGAGGTGTTCTCTCGCATTGACCA
Gma.13580.2.S1_x_at	AW780839	At5g19780	0	Cell Structure			AGGACTGTTCAGTTTGTTGATTGGTGTCCAACTGGATTCAAGTGTGGTATCAACTACCAGCCACCTTCTGTTGTTCCTGGTGGTGACCTTGCTAAGGTTCAGCGTGCTGTATGCATGATCAGCAACAACACCGCAGTTGCTGAGGTGTTCTCTCGCATTGACCACAAGTTTGATCTGATGTATGCCAAGAGGGCTTTTGTTCACTGGTATGTTGGTGAGGGTATGGAAGAAGGGGAGTTTTCTGAGGCTCGTGAGGACCTTGCTGCTCTTGAGAAGGACTATGAGGAGGTTGGAGCTGAAGGAGCGGAAGATGATGAGGAAGGAGAGGACTATTGATAATCGAAGGCTTTTTTTTGTTATCAATGTAATTGTTTCCGAGTTAAAAGGGTATATGCT
Gma.15648.1.S1_s_at	CD404676	At5g54640	4e-42	Cell Structure	Histone		TGTCCTCGAATATCTCGCAGCCGAGGTTTTGGAGTTGGCTGGAAACGCTGCGAGAGACAATAAGAAGACTCGAATTGTGCCGCGCCACATTCAATTGGCGGTGAGGAACGACGAAGAATTGAGCAAGCTTCTTGGTGACGTCACCATCGCTAACGGTGGCGTTATGCCCAACATTCACAATCTTCTCCTTCCCAAGAAGGCCGGTGGCTCATCCAAGGGCGCTGCTGCTGACGATGACTCTTAAATAGGGATTCGCTTTTCTTGATTTTTTTATTATCAAATTTAGATTATCTTTTGGCCTCTCTGT
Gma.15752.1.S1_at	BE610171	At5g59970	1e-37	Cell Structure			TGCTAGGAGGAAGACTGTTACCGCTATGGATGTTGTTTATGCTCTCAAGAGGCAGGGCAGGACTCTCTATGGTTTCGGTGGTTAAATTTTAGGGTTTTGATGGGCTTAGCAGCTGGTTATTTTTGTAAATGGTCGTTTGTTTGGGAGTATTTGATTTTGTGCTTTTTTGTTTTTTAGCCTTTCTTGTTAGGTGTATTGTTATTTTTGCTTCAATTGAAATGGAACAAAGAGTGTTTTGTTTCTGGAATTCTCTTCTTGTTGAAGGTGTACACTGATTACCCGCTAGTTAATTGCGACTTTGGAGATAAANNNNNNNNNNNNNNNNNNNNNNNNNNNNNNNNNNNNNNNNNNNNNNNNNNNNNNNNTTTGCAGCTTTTGTGATCGTTATTGCGTCTGTTC…
Gma.15760.1.S1_at	BE823195	At5g65360	1e-70	Cell Structure	Histone		GGGCTCTTTGAGGATACCAACCTCTGCGCTATTCATGCTAAGAGGGTTACCATTATGCCCAAGGACATTCAGCTAGCTCGTAGGATTAGGGGCGAGAGAGCTTAGGGTTTATGATTTACAAAGCCGTAGTGTTTTCTAAGGGTTATTATTTTGCAATCGATTCCTTCAGCTTAGTATTAGGGTGAAAGTCCTTGTTTTATTGTGACTGTATTGGAAACTCGTTTCTGTAATGTGAGAAATATTAATGTTGAGCCCT
Gma.15878.1.S1_at	CD393373	At2g30620	5e-15	Cell Structure	Histone		AACAAAGGCTGTTCCTGCCAAGCCCGCGGCAAAGCCCAAAGCCAAGCCCGTCAAGGCTTCAAGGACGTCGACGAGGACTTCACCAGGGAAGAAAGCAGCTCCTGCTGCTAAGCCCGCGGCGAAGAAAGTTGCGGTGGCAGCGAAGAAAACGCCAGTGAAGAGTGTGAAACCGAAGAGTGTAAAGTCTCCGGCCAAAAAGGCTACGGCCAAGAGAGGGGGTAGGAAGTGAGAAAGAGTGGTCGGTGGGGTAGGGTTGTTTTGGGGTTGGTGTTGTGAAGTTCTTTGTCCTCTTGGTGTAGTTGGGGGTTACAGATGATGTTCCTATAACAGATGAAATCTGATTTTATGAAACCTTTGTTATTTCCCTTTTTAGTTTTGATTTTTTTTTGGTTCGACCTA…
Gma.16073.1.S1_at	CD395530	At1g54690	4e-43	Cell Structure	Histone		GGTTCCCCTGTTTACCTATCTGCGGTTCTCGAATACCTTGCCGCTGAGGTTTTGGAGCTTGCCGGCAACGCTGCGAGGGACAACAAGAAGACGAGGATCGTTCCNAGGCACATTCAACTTGCGGTGAGGAACGANGAGGAGTTGAGCAAGCTGATGGGGTCTGTGACCATTGCCAATGGTGGTGTTCTGCCTAACATTCACCAGAATTTGTTGCCCAAGAAGGCCGCTGGCAAGGGAAAGCCCGAGATTGGATCTGCCAGTCAGGAGTTTTAGATTCTTAGGGTTTCATCTTGTTAGTATTTAGAGTGCNAAATTGAAAGAAAATGGAACTAGTTTTGGTATGTAGTTGGCCGCGTAGTACAGTGAGACTAGGATTGACATTGAATGATGTATAGTCAT…
Gma.16587.1.S1_x_at	AI736119	At5g49720	0	Cell Structure			CCATGATGTTCGTACAAACTACAATTACACAGAGCCAACNCTTGCTGGAAATGCNGGTTTAGTTGCNGCACTAGTGGCATTGTCAGGCGACAAANGCACATCNATTGACAAAAATACCATTTTCTCTGCTGTTCCCCCAATGTTTCCTACACCGCCACCACCNCCAGCNCCATGGAAACCATAAGCNCATCNTGCCATTGGTTATTTCTTTCTAGCAAGTANCCCAGATGATNTGAGTGCACCGNTAACCTTCGTTGTTTTGTATCAACTNNAAGATCANGGTAATTTTGNAGAAAAAAANGCTTNGNGANNNNGAAGNNNTGGAGCTTGGCCNACTGAATATAGCTGCCTGGGGCCAATGATCGACTCAAGATTNAGCATTAAGAATTGATAAAGTGG…
Gma.16587.2.S1_a_at	BI497998	At5g49720	1e-43	Cell Structure			GGAAATGGAGGGACACTTCTAAGCCAAACCCAAATACAATTGTTGGTGCCATGGTTGCTGGTCCTGACAAGCATGATGGCTTCCATGATGTTCGTACAAACTACAATTACACAGAGCCAAC
Gma.10997.1.S1_at	CD396418	At1g18650	5e-37	Cell Structure			GTCACGGTGGCATTGGACTTGTACACAGCAGTAGTTTCTTCTCGATNGCGCTCTTCTCTGCCTTCATGATGATGCTCTGCTGGGGTTGAGAATGAAAATAAATGGGGCTTGGCCTGGGTATATGGTGCAAAATGCCGTATGTCACTGTATTAATGTGAATGTTATTTTCTAGGTGCTGAACTTGGGACGTTAGTTTTTGGGGTTCTTATAATNTTTTTCTCCACCTTCCACTAGCTATTGGGTTTTTGATTAAT
Gma.1034.4.S1_s_at	BG155028	At4g34050	2e-98	Cell Structure			GAAAGAGATACGCAAGATGACTGCAAAACACCCACTGAACATCATGGCAACACCAGCAGACGAAGGACAACTTCTGAGCATGCTTGTTAAGCTCACGAATTCAAAGAACGCCTTGGAAATTGGTGTATTCACTGGTTACTCTCTGCTCTCCACTGCCCTGGCTCTTCCCCCTGATGGAAAGATCTTGGCTTTGGATGTGAATCGCGAATACTATGAGTTAGGATTGCCAATAATTCAAAAAGCTGGAGTGGCTCACAAGATTGATTTCAGAGAAGGACCTGCTCTTCCGTTTCTTGACGAGATGCTTAAAGATGAAAATAAAAAGGGGTCGTTGGATTTCGTTTTCGTGGATGCTG
Gma.10687.1.S1_at	CD415391	At1g54690	2e-50	Cell Structure	Histone		TCCAAATCCGTTTCAAGATCGCAGAAAGCTGGTCTCCAATTCCCCGTTGGAAGAATCGCTCGATTCCTTAAGGCTGGGAAATACGCCGAGCGTGTTGGTGCTGGTGCTCCTGTGTACCTCTCTGCAGTGCTCGAATATCTCGCTGCTGAGGTTTTGGAATTGGCTGGGAATGCTGCTAGGGATAACAAGAAGAATCGTATTGTTCCTAGGCACATTCAGCTTGCTGTGAGGAACGATGAGGAACTGAGCAAGCTTTTGGGGTCTGTTACCATTGCCAACGGAGGTGTCTTGCCGAACATTCACCAGACTCTGCTTCCCAAGAAGGCTGGAAAGGGGAAGGGCGAAATTGGATCTGCCTCTCAAGAGTTTTAGGGTTTTTGTTTTACCCATTTGGACTAT…
Gma.10707.1.S1_x_at	BI967315	At5g02560	1e-40	Cell Structure	Histone		GAAGCCGGTTTCAAGGTCCGTCAAGGCCGGTCTCCAATTCCCCGTCGGAAGAATTGGCCGTTATTTGAAGAAAGGAAGGTACGCCCAGCGTGTCGGTACCGGTGCTCCCGTTTACTTGGCCGCAGTTCTCGAGTACCTAGCTGCTGAGGTGCTTGAGTTGGCTGGGAATGCTGCACGTGACAACAAGAAGAACAGGATTATTCCGAGACATGTGCTNTTGGCTGTNAGGAACGATGAGGAGTTGGGGAAATTGCTTGCTGGTGTCACCATTGCNCATGGTGGTGTNCTTCCAAACATTAACCCTGTTTTGNTNCCTAAGAAGACNNAGAGGGCTGCCAAGGAGCCTAAGTCTCCATCCAAGGCTACTAAATCTCCTAAGAAGGCCTAGATTATCCTTTT…
Gma.10707.3.A1_a_at	AW350624	At5g02560	9e-21	Cell Structure	Histone		CGTATACTTGGCTGCAGTTCTCGAATACCTAGCTGCCGAGGTGCTTGAGTTGGCTGGGAATGCAGCACGTGACAACAAGAAGAACAGGATTATTCCAAGACACGTGCTTTTGGCAGTGAGGAACGATGAGGAGTTGGGGAAATTGCTTGCTGGAGTGACAATTGCACATGGTGGCGTGCTTCC
Gma.10707.4.S1_at	AW309587	At5g02560	2e-42	Cell Structure	Histone		TAAATCTCCTAAAAAGTCTTAACTGACTTAGTTTATTGTTTCTCTATTTAGTGTGCACAAAATGTAAATCTGTGTTTAGGTTCCTTCTTGTATCACCATTATTTGTAGTTCTCAAGTCGCTGTTTCTTTTTCACATTTTCATTCAATCTGTTGAGACAGCAAGCTCTCAGTAATGGATTGATTT
Gma.10707.5.S1_x_at	CD398411	At5g02560	1e-40	Cell Structure	Histone		CAGCGTGTCGGTACCGGTGCTCCCGTATACTTGGCTGCAGTTCTCGAATACCTAGCTGCCGAGGTGCTTGAGTTGGCTGGGAATGCCGCACGTGACAACAAGAAGAACAGGATTATTCCAAGACACGTGCTTTTGGCAGTGAGGAACGATGANGAGTTGGGGAAATTGCTTGCTGGAGTGACAATTGCACATGGTGGCGTGCTTCCAAACATNAACCCTGTTTTGTTGCCTAAGAAGACNGAGAGGGCTTCCAAGGAACCTAAATCTCCATCCAAGGCTACCNAATCTCCTAAGAAAGCTTAAGTGTTTTTATTTTATTTTATTTGAATATGTAAATCAGTCTTTAGATGCTTTTTATGTGAAAGAAAAAATTATCTATTGCNAACACTGTAATTCCTA…
Gma.10738.1.S1_at	BG653978	At5g09810	8e-86	Cell Structure			AAGAAATCACTGCACTTGCTCCTAGCAGCATGAAGATTAAGGTTGTGGCTCCACCAGAGAGAAAGTATAGTGTTTGGATTGGAGGATCAATCCTTGCATCCCTCAGCACCTTCCAGCAGATGTGGATATCGAAGGGTGAATATGATGAGTCTGGTCCATCCATTGTCCACAGGAAGTGCTTCTAAGTCCAAAAGAAATGCTTTAATGGTGAGTTATGTTTTTGCTATGGCTTTTTTGGTGTCTGTGTCATGTCGTGCGAACTATGTTGTCATGGATAA
Gma.10738.2.S1_s_at	BQ629434	At5g09810	1e-104	Cell Structure			TGTTTTTATGGGTCTGTGTCGTGTCATGTTANACAATATTGCCATGGATAAAGAGGTGAGGAAGCATCATTAAAGGAGAGGGTCTATTCTTAGCTTGATGCATCATATTTTGTGTGGGGGCCAGACAGTTAGAAAGGCATTTCTTGCGTTTGGCTATCCGTGGTTCATCTATATCTTCTTAGTAGGTTGTTTGTAGCAAGGGAGTGATTGTGATGATCTCTTTTTCCTCCATTTTCTTTTTGTATTTTTAAAGTTTANATTTGAAGGATTTTTNCCCCTTGGAACATTGAATCATTGAT
Gma.10779.1.S1_a_at	AW309422	At5g66920	0	Cell Structure			GGTTATGATTTTTGGGTCATTGGTCATGGTTTCGGCCAGTGGACAGATGCCAGCAGGNAAAACATATAATCTAGTGGATGCCCTGACTAGACACACTACACAGGTGTATCCAAAATCCTGGACTACTATATTGGTGTCTTTGGATAACCAAGGCATGTGGAACTTGAGG
Gma.11070.1.A1_at	CD412352	At5g59970	1e-40	Cell Structure			GAAAGTTCTTCGCGATAACATTCAGGGTATCACGAAACCTGCGATTCGTAGGTTAGCGAGAAGAGGTGGTGTGAAGAGAATCAGTGGTTTGATCTACGAGGAAACCAGGGGGGTTCTGAAGATTTTCTTGGAGAACGTGATTCGAGATGCTGTGACCTACACCGAGCACGCTAGGAGGAAGACGGTGACTGCCATGGATGTGGTTTATGCGCTCAAGAGGCAGGGAAGGACCCTCTACGGTTTTGGAGGCTAAAGAATTTAACCCTTCTTTTCTGGGTTGCAGGATAAGACATTGGTTCTTTTGAATTTGCGTGGTGTTTTAGTTTAGGTTTGTTATGTATCATACGAATCTCTGGTTTGCATAGAAAATATTTCATTTGAAATTTAAATGGAGTATCG…
Gma.11070.2.S1_s_at	CD393765	At5g59970	1e-40	Cell Structure			CTGTTCTTCTGAAATTCGGTGTGATGTTTAGTTTAGATTCGTTCTGTAACATATGAATCTTCAAAGGTTCTGTTCGGCACAGAAAATGTACTACTTTAATTGAAATTAAAATGAAGGAGCAGCGTTTTCGTGG
Gma.11213.1.S1_s_at	CD394730	At5g10980	4e-71	Cell Structure	Histone		AACGTGCTTAGGCTAATAATAAGAGTAATAACGTAGTTGCTGCTGCTTTTTTTNCGTTTTGCAATACATTTCTTGTTTTAGGGTTATTTTTAGTGTTATGTTCCGGTTTGTCTGTTATGGGATGTATAGAAGATAGATATATCNATCAACNACTTAGCATTTGTAATGATCCTAAACTGAAATATTT
Gma.11213.1.S1_x_at	CD394730	At5g10980	4e-71	Cell Structure	Histone		TGGAGTCAAGAAGCCTCATCGCTATCGCCCTGGAACTGTTGCTCTTCGTGAGATCCGAAAATACCAAAAGAGCACAGAGCTTCTGATCCGCAAGCTCCCCTTCCAGCGTCTTGTTCGTGAAATTGCGCAAGACTTCAAGACCGATTTGAGGTTCCAGAGTCACGCTGTTCTTGCGCTTCAGGAAGCTGCGGAGGCTTACTTGGTGGGTTTGTTTGAGGACACCAACTTGTGTGCGATTCACGCCAAGAGGGTGACCATCATGCCAA
Gma.11334.1.S1_a_at	BI967327	At4g34050	2e-41	Cell Structure			CCCAGGATCGAGATTTGCATGCTCCCGGTTGGTGATGGAATCACTAT
Gma.1181.1.S1_s_at	BE657911	At3g12110	0	Cell Structure			GAAAATCAAGGTGGTTGCACCTCCTGAGAGAAAGTACAGTGTCTGGATTGGTGGNTCTATCTTGGCATCACTTAGCACCTTCCAACAGATGTGGATCTCNAAGGGNGAATATGATGAATCTGGGCCAGCNATCGTTCATCGGAAGTGCTTCTAANGTTGGGTCAAGNNNAGCTGGATGGTGATCAAGTTCTTCATGCACCCAGTCCTGTGCCATATTTCAGTNAAGTTTGGTTGACTTATTTGNTATTTGAAGCTTTGGGTTTTTAATAGATATATCTAGTTTAATGAATGGATTTGTAAGTTGAGTATGTTATAAGTTTCTCCGTTAGGTCNCCTTGGAAGCCAGACTTTTTNATGCAATTGGCGGATGGTATTGGAACTTTGTA
Gma.1166.1.S1_at	AY151271.1	At5g34850	0	Disease & Defense			AGTACTGGGGACACAATCGCAGAAGAAGAAAACTGAAGCATTTTCTATTGAAAGTTATTGATGAAGTTGCCAGCATGTAATTTGAAGTTGAAGCACTAGCATATTTGGCGTTTTGAAAAGGATAAAAATGTGCCCCTTGATTAATATATGC
Gma.11336.1.S1_at	AI442808	At1g18250	6e-66	Disease & Defense			GCAATTAATTAACGAGTGCTCCTTGGTTTAAGTCGATCTCTCCATTATTACAACATGCCGGAAGCCCACCGGCGACCCTGGCGGAGTTCACCCTGGGCAACGAGCAGGACTTCTACGACGTGAGCCTGGTGGACGGGTACAACCTACCCATCTCCATCACCCCCTTCAAGGGATCCGGAAAATGCAGCTACGCCGGGTGCGTGAGCGACCTCAACACCATGTGCCCCGTTGGCCTCCAAGTGCGCTCACGCGACAACAAGCGCGTGGTGGCCTGCAAGAGCGCTTGCTCCGCTTTCAACTCCCCCANGTANTGNTGCACNGGCTCNTATGGAAGCCCACAGGCCTGCAAGCCCACCGTCTATTCCAAGATCTTCAAGACCGCATGCCCCAAGGCCTACT…
Gma.11263.1.S1_a_at	CA802847	At5g25610	4e-76	Disease & Defense			GGAAACGGGATTGCAGAAATACACCGTAGCACCGGGAGTGAAGAAGTTATCAGGGGACAAGGCTGTTGTGTGCCATAAGCAGAACTACCCTTATGCTGTTTTTTACTGTCACAAAACCGAGACCACCAGAGCTTACTCTGTGCCTTTGGAGGGTACTAATGGGGTTAGGGTTAAAGCGGTAGCAGTGTGCCACACTGACACATCAGAATGGAACCCTAAACATTTGGCCTTTCAGGTGCTCAAAGTTAAGCCAGGAACTATTCCTGTCTGCCACTTCCTTCCTGAGGATCATGTTGTTTGGGTTCCCAAGTAGATTTGC
Gma.11154.2.S1_at	BU547879	At1g63220	4e-46	Disease & Defense			GAGGCAACCATTCATTTAGATCCAGTGTTTGAAGCCGGTAGCATTCCAGAAACTGCTTACAAGGTTGTGAAGGACGAAGAATATTGTGGTGAGATTAAGGTGGCTCTCACTTTCACTGCTGAGAGAAATGAGGAGCAGGGNTATGATGCACCTGAAGAGAGCTATGGTGGATGGAAAGAATCCAGTGGGGAATATTAAAGTGAAAGAAGAATTTACATACTTCAATGGCCAGACTTACCTTTATAATGAAAAATAAGCAGTTTTGGTGTCACTTTTAGGCAATTTCCATTATTGTGTTTTCTGGTGTGAAGATCCAATAGTGTTGTGCTTTTAGGTTGCATTCCTCCCTTTGGATATTAAAGTACATTATGCTTGATATATTATCTTTTATGCGTCAGT…
Gma.11119.2.S1_s_at	CF920743	At1g24020	1e-05	Disease & Defense			AATAGAAGCGATTGATGAGGCTAACTTGGGATATAGCTATAGCGTAGTTGGGGGAGATGGGTTGCCAGACACAGTGGAGAAGATCACATTCGAATGCAAATTGGCTGCTGGCGCCAACGGAGGGTCTGCTGGGAAGCTAACTGTCAAATACCAAACCAAAGGAGATGCTCAGCCCAACCAAGACGACCTCAAAATTGGCAAAGCCAAGTCTGATGCTCTTTTCAAGGCCGTTGAGGCTTACCTTTTGGCCCATCCTGATTACAACTGATCCTCTTCATCACTATTCAGTCAGCAACGACCTTGCTTTATATTATATACAAGAGTTTTCTTGCCTTGTGTGGAGCTTTATCCAATCACTGTGTGTGGTGTGTGCTTAA
Gma.10773.1.S2_at	CD398431	At5g36930	1e-121	Disease & Defense			ACGGGACGAAGAGGCTCTGCCACATCCGCGGGAAGATGCACAAGAAGGTGTGGATCGCCGCCGGAGACATCATCCTGGTTGGACTCAGGGACTACCAGGACGACAAGGCTGACGTCATCCTCAAGTACATGCCCGACGAGGCCAGGCTCCTCAAGGCCTACGGCGAGCTCCCCGANACCACTCGCCTCAACGAGGGCATCGGCGCCGGCTTGGACGAGGAGGACGACGCCACCGCCAACGACTACATCGAGTTCGAGGATGAGGATATTGATAAAATCTAATCNCNCTCNCNNNCGCAATTATCATTCATATNNTNTCNTCNNNNTNTCTGTCTCTAGTAGTATTTCGCTCTCTGCTTG
Gma.10757.2.S1_s_at	BG650239	At3g16920	1e-138	Disease & Defense			TGCTCATGATGCTTTTGTCGGCAGCTGGAAGCCTACCAAGAATGACACTATGGAGAATCGGGTTCCTGG
Gma.10720.2.S1_a_at	AW396215	At1g77490	1e-137	Disease & Defense			AAGTGTCATGTTTTCTTGTGCCAGTATCTTTTAGTAATACAAGAAGANGCTATTTTCAAATCANGTGATATCNCATGTAAAATNTNGAAGTTTTAAATGAAGAAGAAAGGAATAAANTTCAATAGTGTGCCTATTTGAATTGCAGAG
Gma.10658.1.A1_at	CA852384	At1g70890	1e-22	Disease & Defense			GAGTCGATCAAACACTGGACTTGTACNANAGATGGTAAGATTACAACATGTCTGGAGAGTATTGAATCCGTTGATGAACCGAACAAAACAATCACCTACAAGCTCTTCGGAGGAGATATTGGTCATAAGTATAAAGTCTTTAAGCTCATTTTTCAAGCTATTGACACCGATCATGGGGGTGTTATTATCAAATGGACCGTTGAATATGAGAAGATTGATGAGAATGTTGATCCTCCGTATGGCTACATCGAATACCTGCACAGTGGCAGTAAACAGATTGATGGCAATCTTCTCAAGCCATAGCTCCAAAAGTTATGCAGAAAATAATTAATAAGTAAGAAATAATTGGCTTGGCCTTAGAATATATAGTGCTTGTCTAGTTATCAGTATAAT
Gma.10988.3.S1_at	CA938233	At1g47128	0	Disease & Defense			TACAGTTGCTGCCCTAACGACTATCCCATCTGCAACACTTATGCTGGAACTTGTCTCAAGAGCAAGAACAACCCATTCGGAGTGAAGGCATTGAGGCGTACTCCGGCTAAACCCCATTGGACCTTTGGGCGTAAGAACAAGGTCAGCAGTGCTTAAGCAGATAAAGGAAATGTGAACGTGCAGGAAGGAGCCAATGATGAAGTAAATGAAAGACGAAGAATTAAAACACCAGCTGATACACTTCCCCTT
Gma.10988.3.S1_s_at	CA938233	At1g47128	0	Disease & Defense			TCTCAAGAGCAAGAACAACCCATTCGGAGTGAAGGCATTGAGGCGTACTCCGGCTAAACCCCA
Gma.10988.3.S1_x_at	CA938233	At1g47128	0	Disease & Defense			GTTGCTGTCCTCTTGAGGGTGCTACCTGCTGTGATGACCACTACAGTTGCTGCCCTAACGACTATCCCATCTGCAACACTTATGCTGGAACTTGTCTCAAGAGCAAGAACAACCCATTCGGAGTGAAGGCATTGAGGCGTACTCCGGCTAAACCCCATTGGACCTTTGGGCGTAAGAACAAGGTCAGCAGTGCTTAAGCAGATAAAGGAAATGTGAACGTGCAGGAAGGAGCCAATGATGAAGTAAATGAAAGACGAAGAATTAAAACACCAGCTGATACACTTCCCCTTTACCTTCACATAAATTTCTCTGTGCCATTTTATTATGATACAAATTGATACTATTCTGTATCAAATTTCAGTCAGATATTGGCTGTGTACATAGGGTTATATTATTGAT…
Gma.10936.1.S1_s_at	BI700784	At4g37520	1e-116	Disease & Defense			AACGTGGATCCTAGGATTGCCATCAACATGGACCCAACAACTCCTCGTAAATTCGACAATGTTTATTACCAAAACCTTCAACAAGGAAAGGGCCTCTTCACCTCGGACCAAATCCTCTTCACGGACCCAAGGTCTAGGAACACCGTTAATTCCTTTGCTTCCAGTACCAACGTTTTCAACTCCAACTTTGTGGCTGCTATGACCAAATTGGGTCGCGTTGGAGTTAAGACTGCAAGAAATGGGAAAATTCGTACCGATTGTTCTGTGCTTTAAGTTAAGGCTTTGGTTGATCATGTAAAGTCGCAAACAGTGCATGTTTTGGAGGTAAACAACAACACAAGTTGCAATTTTAGTGCGGGGGGATTTGCAAAGGGTAGTTAGATTCATTGTTGTTAATAA…
Gma.10850.2.S1_at	CF920623	At1g76180	3e-11	Disease & Defense			GAAGACAGAGGAGGCCACAGCTACTACTCCTCCTCCACCACCACCTGTTGCATCATTGGAGCATGGTGAAGGTGCTCATCATGAAGGAGAGGCCAAGGAGAAGAAAGGTATATTAGAAAAGATAAAAGAGAAGCTTCCTGGTTATCACTCCAAGACAGAGGAGGAAAAGGAAAAGGAAAAGGAGAGTGGTGCTCATTGATATTTAAGATTGAGACAAGGCTTTTTTGTTGGTTGGAGATGCATGATTGTGGTGTGCTTTGTT
Gma.16507.1.S1_at	AW101606	At1g05260	1e-125	Disease & Defense			GACAAACTCAGTTACAAAGGCTCAAATCATTGAATTGCTTGAAGGGTCAGTTGAAAATTTCTTTGCTGAGTTTGCAACCTCCATGGAGAAAATGGGAAGAATTAATGTAAAGACAGGGACAGAAGGAGAGATCAGGAAGCATTGTGCATTTGTAAATAGCTAAGAATCTTGTCTTGTTCATGGATGAATCTTGTATCATTTATTTTTTGGGTTTGGTTATTTATGCTATGCCATGTTTTTTTATTAGTTATGCTATGCCATGTGGTGTCTGTCTACATATGAGTGATCCCGTATGGTATGGTTGTTGTATGTGCGATGGAATAAGTGGGTTCCATTGTTATTCTTATAATTTCCAACTTTGCTGGTAGATCTTGTAATAAGAAGCAGAATTTCTTGTGC…
Gma.15568.1.S1_at	AI442650	At5g49040	3e-39	Disease & Defense			GGCTCCGTTGGAATCTTTGACACCCCTTTAACCGTGGGACCTGAGGTGTACTCCAAGGTTGTCGGAAAAGCCGAGGGCTTGTTTGCCTCCACGTCACAAACGCAGTTTGACCTGTTACTGATTTACAACTTCGCGTTGACCCAAGGGAAGTACAACGGCAGCACCATCACGTTCACGGGGAGGAGCCCCCTCTCGGAGAAGGTGAGGGAGCTGCCCATTGTTGGTGGTAGTGGGGTCTTCAAATTTGCCACTGGGTATGTTGAGTCTAGGACGCTAAGTTTTGATCCCCAAACAAGGAATAACACGGTTCAGTTCGACGTGTATATTTACTATTGATGATTATTGAATGTGTTTTTTTCATGTTGATGCGTTATCGCTTTGGTCTGTCTCACCTAGTTT…
Gma.13160.1.S1_at	L10292.1	At3g09640	1e-107	Disease & Defense			TACTGACCAAGATATCGTTGCTCTATCTGGGGGTCACACTATTGGAGCTGCACACAAGGAGCGTTCTGGATTTGAGGGTCCCTGGACCTCTAATCCTCTTATTTTCGACAACTCATACTTCACGGAGTTGTTGAGTGGTGAGAAGGAAGGTCTCCTTCAGCTACCTTCTGACAAGGCTCTTTTGTCTGACCCTGTATTCCGCCCTCTCGTTGATAAATATGCAGCGGACGAAGATGCCTTCTTTGCTGATTACGCTGAGGCTCACCAAAAGCTTTCCGAGCTTGGGTTTGCTGATGCCTAAGCAACGTTTAGGGGATTGTTGAAGAGGCATGGTGCCCATAATATTTCTCTAAAAAATTGTATGGTCATGGTTTTTAATGCCAATGTGGGTTCCCCAGA…
Gma.1327.2.S1_s_at	BI970072	At5g25610	1e-53	Disease & Defense			AATGCTCGAGTTATTTCTACAGAAGCAGAAAAGGAAAGTAAGTCCCAAAAATTCTCGGTGAAAGATGGAGTGAAGTTGTTAGCAGAAGATAAGGTCATTGTTTGTCATCCTATGGATTACCCATATGTTGTGTTTATGTGTCATGAGATATCAAATACTACTGCGCATTTTATGCCTTTGGAGGGAGAAGATGGAACCAGAGTTAAAGCTGCAGCTGTATGCCACAAAGACACATCAGAATGGGATCCAAACCATGTGTTTTTACAAATGCTTAAAACCAAGCCTGGAGCTGCTCCAGTGTGTCACATCTTCCCTGAGGGCCACCTTCTCTGGTTTGCCAAATAGGTTACTTAAGTCTTTATTTGTTAGTGTGTCCTTAAATAAGTAGGCATTTCCATA…
Gma.12498.1.S1_s_at	BQ611770	At1g05260	1e-112	Disease & Defense			CCTGGAAGTCGCAAGACATTTGATCTTAGCTACTATAGTCACGTTATTAAGAGAAGGGGTCTATTTGANTCAGATGCTGCATTNTTGACTAACTCAGTTACAAAGNCNCAAATCATCCAATTGCTTGAAGGGNCAGTTGAAAATTTCTNTGCTGAGTTTGCAACCTCCATNGAGAAAATGGGAAGAATTAATGTGAAGACAGGGACAGANGGAGAGATCAGNAAGCATTGTGCATTNNTAAATAGCTAAGAATCTTGTCTTGTTCATGGATGAATCT
Gma.15307.1.S1_at	U64866.1	At5g25610	2e-27	Disease & Defense			GAATCATCAAATGCTTCATCAACTTATGGGAGTTGATCCTGGAACTAACCCTGTTTGCCATTTCCTTGGAAGCAAGGCCATTTTATGGGTACCCAATTTATCTGTGGACACTGCCTATCAGACCAACATTGTTGCTTAATTAGTCCATGCATCTTGAGCACCATGAGAATGAGATTGTGTATAAAATAAATTATCATGTGCTGTGTGTTGTGCAAGTACTACCTTCTCTAGCTAGATTGCTAGAGCTAGAATTTCAACCTACCTATGTGTACTGATAAGATCTGC
Gma.15464.1.S1_a_at	AW101841	At1g08830	1e-64	Disease & Defense			GAGAATCGTCATGCTGGTGATCTTGGGAATGTTAATGTCGGTGATGATGGTAC
Gma.15464.1.S1_x_at	AW101841	At1g08830	1e-64	Disease & Defense			GTGCCCCTGAGGATGAGAATCGTCATGCTGGTGATCTTGGGAATGTTAATGTCGGTGATGATGGTACTGTCAGCTTCACTATTACTGACAGCCAGATTCCTCTCACTGGACCAAACAACATCATAGGAAGGGCGGTTGTTGTCCATGCTGATCCTGATGATCTTGGGAAAGGTGGTCATGAGCTTAGCNAAACTACTGGAAATGCTGGTGGCAGAGTAGCTTGTGGTATCATTGGTCTGCA
Gma.15464.2.S1_at	BG653526	At1g08830	2e-64	Disease & Defense			ATGGTTGCCTGTCAACTGGAGCGCATTTCAATCCTAATAACAACGAGCACGGTGCCCCTGAGGACGAGAATCGTCATGCTGGTGATCTTGGGAATGTTAATGTCGGTGATGATGGTACCGTTAGCTTCAGTATTACCGACAGTCAGATTCCTCTCACTGGACCAAACTCCATCATAGGAAGGGCTGTTGTTGTCCATGCTGATTCTGATGACCTTGGAAAAGGTGGTCATGAGCTTAGCAAAACTACTGGAAATGCTGGTGGCAGAGTAGCTTGTGGTATCATTGGTCTGCAAGGATAAACTAATCACATGAGGTTGGAACCGTGCTTTAGAATTGTGGAATAAAGTAGCACCCATTTAAACCCGTTTGGTTAGGTCCGGTCTGTGTACGGCTGAATTC…
Gma.2205.1.S1_at	AF127110.1	At1g70890	3e-23	Disease & Defense			CTTTCAAGCGATTGATAAGGAAAATGACAGTGCTATTATCAAATGGACAATTGAATATGAGAGGATTGGTNGAGGAAGTTGATCCTCCATATGGCTACATTGAATACGTCCACAAATGCA
Gma.2220.1.S1_s_at	AF128268.1	At1g17860	3e-17	Disease & Defense			TACTCAGAAATCTTCCGTGGCACACCAGTCAAATTCAGCATACCTGGGATAAGCCCTGGAATCATCTTTACAGGTACTCCACTTGAAATCGAGTTCGCAGAGAAACCNTATTGTGCTGAATCCTCCAAATGGGTGGCGTTTGTGGACAATGAAATCCAAAAGGCATGTGTGGGTATTGGTGGTCCTGAAGGTCATCCTGGTCAACAAACATTTAGTGGCACATTTAGCATTCAGAAATATAAATTTGGATACAAACTTGTGTTCTGTATCACTGGCTCAGGCACTTGTTTAGATATTGGAAGGTTTGATGCCAAAAATGGTGAGGGAGGAAGACGTTTGAATCTCACTGAGCATGAGGCCTTCGACATTGTTTTCATAGA
Gma.17765.1.S1_at	BM188674	At3g60280	4e-26	Disease & Defense			TGTGCCCCATTTCAGGCCACTGTGCTGGAGGCATGAAGCTGCAAATTAATGTGGCTGCTGCTAGTGGGACCCCCCCAACAACCCCAAGTGGCACCCCACCAACCACCCCATCAAACCCTTCTCCTTCTCCTCCCTCTGAGTCAGGATCCACCAACACCACTTCACCACCAAAGCCTAGTGGAGCTGTAACTGTTTCCAGTGGCATTGGCCTTTTGGTGGGGTCTTTCTTTGTGTCAGCAATTATGTTTGGTTTCATGGGCTAGGGAAGAGGCAGTGCTGTTTTTTTTTTNATTCTCCTTTTTATTAATATGTTATTGTTTTGCTGAGAGTTTGTGTGAATTTCATCATTTAATCCAGATGTATATCTAATCTTGATATGTATCTCCTTTTAATATTTAA…
Gma.17271.1.A1_at	AW310765	At2g38390	0.0002	Disease & Defense			GTCAACTAGTTGGATTGCAAGGTCTGGATTACAATAATGGCATATACAGTGGAAAGAATAAGAAACTGTATTGTTTTATAAGGTTAGTCATGTCAGTTTTTATTTTTGCTATAAAAAAGTTTAAGTGGGTTGGATTCGGAAACTTATCAAGACTCAATGAGTTTAAGTGAGTTGGATTCCGAAAAAGTTTAAGCCGTTGGGTTGAGATGCTGAGTTTCTATGTTAAGATTCAATTGTATTTTTATGTTGTATGTGTTGGTTTCAATCCAAAAGGAATTACTCTTTTCAAGTACTAAGCAACTTCATATGTATCGTGAATTGAACTCACATGGTTATTACATCGTTAACTTCTAAGCCCAATGTTATGCATGCAA
Gma.2821.2.S1_a_at	BI469945	At4g11650	4e-69	Disease & Defense			GACGCGGGAAGTGCCTCACCGGCGACTGCGACGGTGTTCTTGAGTGCAACAAAACAGGTACACCTCCGAACACGTTGGTGGAATTCGCGTTGAACCAGTACAACAACCTCGACTTCTACGACATCTCCCTCGTCGACGGTTTCAACATTCCCTTGCAGGTGAGCCCGACCTACAACTGCAGCTCCGTGAAATGCGCCGCCGACATCATCGGAGAGTGTCCCACTCAGCTTCAGGTTCCCGGCGGCTGCAACAACCCGTGCACGGTTTTCAATACGACTCAGTACTGTTGTAGCACCGG
Gma.2821.2.S1_at	BI469945	At4g11650	4e-69	Disease & Defense			ACAGGTACACCTCCGAACACGTTGGTGGAATTCGCGTTGAACCAGTACAACAACCTCGACTTCTACGACATCTCCCTCGTCGACGGTTTCAACATTCCCTTGCAGGTGAGCCCGACCTACAACTGCAGCTCCGTGAAATGCGCCGCCGACATCATCGGAGAGTGTCCCACTCAGCTTCAGGTTCCCGGCGGCTGCAACAACCCGTGCACGGTTTTCAATACGACTCAGTACTGTTGTAGCACCGGTGCTGCGGGTTGCGGTCCCACTGATTATTCCAAGTTCTTCAAGGAGAGGTGTCCAGATGCCTTTAGTTACCCTATGGATGACGCAAGCAGCATGTTCACTTGCATGGGAGGATCTGATTATAGGCTTGTGTTTTGCCCTTAATTAATTCATCAT…
Gma.2773.2.S1_at	BU765875	At1g65870	2e-38	Disease & Defense			GCTACCGTCGAATACAATGCATATGTCTACCATTATTCTTCCACCAGCTCTTCTTCCTCTCCCCACCTTTTTAATCAGGGACTTCATTTATGTCATGGAGACTACTAAGCTTATAATAAACTCAGAAAAGAAATTAGACTACAGAAGGTGGGGGCATAAATCCAAAGACCAAGTTGCTAATTTACTCCTCTGAATCTGTCCAGTACTATAAATAAATTTGCTCTTTTCGTACACGGAATTAAGTCTTTGTTGTAGTGCAAGTTGCGTCAGCTAAATAATGTGCCACTCAAATATTTTTTCTTTTGGAAATGTTGCCCGTTGATTATTATTTGT
Gma.257.2.S1_a_at	CD400364	At3g12490	2e-14	Disease & Defense			AAACAAGTGGTTTCTGGCACCTTGTACTATATCACTTTGGAGGCAAATGATGGTGTGACGAAAAAGGTTTATGAAACTAAGGTGTTGGAGAAACCATGGTTGAACATCAAGGAGGTTCAGGAATTCAAGCCCATCACTGTTGCTGTTAATCCTCTTTCGGTGACGGTCTAGCACATAGCTAGGTTATGGAAGTGACTAGCTTGGCCGCAAGAGTAATAATATGTATGAACTGAATAAATGTACCTATTAACTCTACAAACGGTGTGGGGTTGTGCATGTTTGCCATCCTATATATTTCAGTA
Gma.2593.1.S1_s_at	CF922368	At3g09270	4e-44	Disease & Defense			GCAGTTATTGCATTCTTCCTTAGCAATAATGATGAAGAGCGAGAAAAGAGCATAGAGAAGATATGGGAGCATCTCAGGGTTGTTGAGAATCAGTGTTTTGGTGATCAGAAGAAATTTTTTGGGGGAGACATTATTAACATTATGGACATAGCTTTTGGGTCCATATTCAAAATTCTTGTGGTTGCAGAAGATATTCTTGACGCGAAGGTCCTGGAAGATGAGAAATTCCCTCACTTGCATTCATGGTATAATAATTTCAAGGATGTTGCAGTTATTAAAGAAAACCTCCCAGACCATGAGAAAATGGTGGCTTTTGCTAAGTTTATTAGAGAAAAACGTTTGGCATGTACCTAAGAAAGTAATCTTATATGAGATCAAGTATGAATCACTTTGTATCTG…
Gma.2590.1.A1_s_at	CD406617		0.0001	Disease & Defense			GGAGGCAACCACCATTAACGAGCTGAAGAAGCCTGTTGTGGAGAAAGAAGCTCCAGGGCATGCCATATGAGGGCATGCACGTACGGCCT
Gma.2444.1.S1_a_at	AF035255.1	At4g35090	0	Disease & Defense			ATGATTGTTAGAGTTGCAGACGTGCAAAGAGTACGATAA
Gma.2444.1.S1_x_at	AF035255.1	At4g35090	0	Disease & Defense			TTCCTGCTAATGCTCCCAAGTGTGCTCACCACAANAATCATCATGAAGGTTTCATGAATTTCATTCACAGGGATGAGGAGGTNAATTACTTCCCTTCAAGGTATGATCCTGTTCGTCATGCAGAAAGNGTTCCCCATACCTCCTGCTATCTGCAGTGGAAGGCGTGAAAAGTGTGGAATTGAGAAGGAGAACAACTTNCAAGCAGCCCGGAGAGAGATACCGNTCTTGGGCACCTGACAGGCAAGATAGATTTNNTCGCCGATGGGTTGATGCTTTATCTGACCCACGGGTCACCCATGANATCCGCAGTGTCTGGATATCNTACTGGTCTCAGGCTGACCGTTCTCTAGGCCAAAAGATAGCNTCTCNTCTNAGCANGAGGCCAAATATTTAATGTTG…
Gma.2444.2.A1_a_at	CD401237	At1g20620	2e-22	Disease & Defense			ATATTTATATACCTTTTCGGCATGTTTCGCTGCTATTGTT
Gma.2302.1.S1_a_at	AW307490	At3g45310	1e-148	Disease & Defense			AATATGGTCCCTGGTGACTACCACCTTGTCATGCTTCAGAGTTTAGAGCGTATTGCTGATGCCAGTATTGATGAATGATGATTAAAGATAAGTGTAATTGTATGATGAAAATTGCTCCTAGTTGGGTTGG
Gma.2302.1.S1_at	AW307490	At3g45310	1e-148	Disease & Defense			TGGAGTTTTCACTAGTGACACTTGTGGTAGCACTTCCCAGGATGTGAACCATGCCGTTCTTGCTGTTGGATATGGAGTTGAAAATGGTGTCCCATATTGGCTCATAAAAAATTCATGGGGAGAAAGCTGGGGTGAAAATGGCTACTTCAAGATGGAATTGGGGAAGAACATGTGTGGTGTTGCAACTTGTGCATCTTATCCAATTGTGGCATAAATTGCATAACAATATGGTCCCTGGTGACTACCACCTTGTCATGCTTCAGAGTTTAGAGCGTATTGCTGATGCCAGTATTGATGAATGATGATTAAAGATAAGTGTAATTGTATGATGAAAATTGCTCCTAGTTGGGTTGGCATGATGTATAAAATAAGCTAGAAGTTGTTGTAAATCACATAAGT…
Gma.2302.1.S1_x_at	AW307490	At3g45310	1e-148	Disease & Defense			TGGAGTTTTCACTAGTGACACTTGTGGTAGCACTTCCCAGGATGTGAACCATGCCGTTCTTGCTGTTGGATATGGAGTTGAAAATGGTGTCCCATATTGGCTCATAAAAAATTCATGGGGAGAAAGCTGGGGTGAAAATGGCTACTTCAAGATGGAATTGGGGAAGAACATGTGTGGTGTTGCAACTTGTGCATCTTATCCAATTGTGGCATAAATTGCATAACAATATGGTCCCTGGTGACTACCACCTTGTCATGCTTCAGAGTTTAGAGCGTATTGCTGATGCCAGTATTGATGAATGATGATTAAAGATAAGTGTAATTGTATGATGAAAATTGCTCCTAGTTGGGTTGGCATGATGTATAAAATAAGCTAGAAGTTGTTGTAAATCACATAAGT…
Gma.2302.2.S1_x_at	BU965409	At3g45310	1e-139	Disease & Defense			ACATGTGTGGTGTTGCAACTTGTGCGTCTTATCCAGTTGTGGCATAAATTGCATAAGAATATGGTCCCTGGTGACTACCACCTTGTCATGCTTCAGAGTTTAAAGATAAGTGTCATTGTATAATGAAAATTGCTCCTAGTTGGGTTGGTATGATGTATTAAATAAGTTAGAAGTTGCTGTAAATCACGTAAGAATATCATGGCCTGAATTGTGTGTA
Gma.3108.1.S1_at	CD409593	At1g29850	1e-41	Disease & Defense			AAGATTTTATATTGAGAGCTGCTCAGATGGGTCAGATAACTGAAAAGGTTTCTGAGGAAAGACTCATATCACTGTTGGAGCAGATAAACAACCAAACAACAAGGCAGACAAAAGTTACAATACAGAGGCGTCGAAGTGTTCTTGAGGATGATGATTAACTTTCACTGTCTCTTTAAACGGTGTGCCTTGAGTATTGATTTCATGCTTTATTATATATTTTACTAAGTATTGTATAAGTGGATTGAGAAATATATCTGTTTCAGATTGAAATTTTGGTTGCCTTGCCAGGCCTCCTAATTAAAATACTT
Gma.3118.1.S1_s_at	BQ786048	At3g09390	0.005	Disease & Defense			AGTACTCTTTTGACTTGAGTTACGTTGAGAAGACAACCACAGAGACTCTAGTTTTGGGTGTTGGGCCTGTGAAGGCCCAATTGGAGGGTGCTGAAATGGGTGTTGCATCTGAGAACGGTGGCTGCAACTGTGGATCAAGCTGCACCTGTGACCCATGCAACTGCAAGTAAGGTCAAGATGTATAACCTTGAAGCAGAGATAGCTGTAATATATGTATCAACAAATAATAAGAAGTAGAAGTTGCGTTTGGAGCTTTAGAATAAAGTGTTTGCTATGTGTTTT
Gma.3153.1.S1_s_at	BE822687	At5g02790	6e-91	Disease & Defense			AGATCCAATACATCAAGCCGGTCCTGCCTTTGATTACTTAGAGAATGCTCTTGGTAAATTTGGTGATGGGCCATTCTTTCTTGGTCAATTCAGCTGGGTGGATATTGCTTATGTTCCATTTGTTGAAAGATTCCAGCTCGTCTTTGCTGATGTGTTCAAGCATGATATAACTGAAGGAAGACCTAAACTTGCAACATGGATTGAGGAAGTGAACAAGATTAGTGCTTATACACAGACAAGAGCTGATCCAAAGGAAATCGTTGATCTTTTCAAGAAACGTTTTTTGGCTCAACAGTGAAAATTTGGTTGCAGTGGGTATCCTCTAAGTTGTAGATTGTTGTCAATAAAGTGTTGTGTGTTTATCGGATGCTTCTTTAGTCACATGTTGTTTTGTCACTT…
Gma.3333.2.A1_at	CF922006	At5g25610	2e-10	Disease & Defense			AATCATATTATATTTAGGCAGCTTGGAATCAAGCCTGGGAAGGATGCAGTGTGCCACTTCTTCCCTATAAAACATCTTATGTGGGTTCCCAAGCCTTTACAAGCCACCATGTGAATGGAATGAGTTCCCTGGGTTTCTGTAATAAAGGTCAATCTCAACAATGATGACCATGTACCCTTTGTGGACTTCCTCTTTGTTTGTATGTCTTGTGCCTTGTTTTATGTTAAA
Gma.338.1.S1_at	AF145348.1	At4g21960	1e-148	Disease & Defense			CAAGGGTCTCTTGATAGTGGATCACCAACTAGCCAATGACAAGAGGACCAAGCCTTATGTGAAGAAAATGGCCAAGAGCCAAGACTATTTCTTCAAGGAGTTCTCTAGAGCCATTACCTTGCTCTCAGAGAACAACCCTCTCACTGGCACAAAGGGTGAGGTCAGAAAGCAGTGCAATGTTGCCAACAAGCACCATGATCAGGACCCTTGAATTTTCCTCCCCTTGTCTATGATCGAGGAAGAAAATCTGTAATATATTATGCAAAAAATAATTAAGGTCTTTTCCTTTAAATGGGCTGGTTCAATGAACCGAGACCACTGCAGGTTCATGGGGATGGGAGGATTAAGAGGCTATGTTTTTTAATCTTCCGATGTTACTGTTGTTTTTTTTTTAATTTC…
Gma.338.2.S1_s_at	AW569086	At4g21960	1e-110	Disease & Defense			ACAAGAACACTGCTTTCTCCTGGCTCAGGAACATCTTCCATGACTGTGCTGTTCAGAGTTGTGATGCTTCACTGTTGCTGGACTCCACAAGAAGGAGCTTGTCTGAGAAGGAAACAGATAGAAGCTTTGGGTTGAGAAATTTCAGGTACATTGAGACCATCAAAGAAGCTTTGGAAAGAGAATGCCCTGGAGTTGTTTCATGTGCTGATATCCTCGTTCTCTCTGCCAGAGATGGCATTGTTTCGCTAGGAGGTCCCCATATCCCTCTTAAGACTGGAAGAAGGGATGGTAGAAGGAGCAGAGCTGATGTGGTTGAGCAGTTCCTCCCAGACCACAATGAGTCCATTTCTGCAGTTCTTGACAAGTTTGGTGCCATGGGAATTGACACCCCTGGCGTCG…
Gma.339.1.S1_s_at	AF048978.1	At1g17180	3e-84	Disease & Defense			GAGGTGCCTTCAGAAAGAAAGCGTTGCCAAGTCTCTTCCTGATCAGCAAAAGGTTTATGAGTTCATTATGGATCTAAGAAAGAAGTTAGGCATTGAGTAGGTTGGAGCTTAATGGCCATTGTGAAGTAGTGGTTTTCCATTGGTCGTTCTTAGCCTTTCAAATAAGT
Gma.4077.1.S1_at	CD414118		0.0005	Disease & Defense			ATTGCAAGCATCATGGCTGAGGAGAAGCACCACCACCACTTNCACCACCACAAGGGCGATGATGTGCCTGGCGAGGTTGATTATAAGAAGGAGGAGAAGCACCACAAGCATCTTGAGCACCTTGGGGAACTTGGTGCTGCNGCTGCCGGTGCTTATGCCTTGCATGAGAAGCATGAGGCCAAGAAAGACCCAGAGCATGCTCACAGGCACAAGGTAGAAGAGGAGATTGCGGCAGCAGCTACTGTTGGTGCTGGTGGTTTTGTCTTGCATGAACACCATGAGAAAA
Gma.3612.1.S1_s_at	BQ452792		1.1e-39	Disease & Defense			AATCCACAACAAAAGCGTGCTGTAACAGCTGTCCTTGCACAAAATCAATCCCTCCACAGTGTCGTTGTTCAGATATTGGAGAAACATGTCACTCTGCATGCAAAACTTGTATTTGCACTCGCTCAATTCCTCCACAGTGTCATTGCAGTGACATAACCAACTTCTGTTATGAACCTTGCAACTCCTCTGAAACCGAAGCTCACTAGGAATATTGAGCATGTTCCAGTGACTAACATGTTTGACAGAGTCACTAGGCTTTGTTTTCATCT
Gma.3570.1.S1_at	CD397063	At3g52960	4e-68	Disease & Defense			AAGTCCTCCTGTTATCTGACGGTAACGGAACCTTCACCAAAGCCATTGGGGTCGAACTTGATCTCAGCGACAAGCCCGTTGGTTTGGGCGTTAGGTCTAGGCGTTACGCGCTTTTGGCCGAGGATGGGGTTGTCAAGCTCTTCAATTTGGAGGAAGGGGGTGCCTTCACTTTCAGCGGCGCTCAGGACATCCTTGATGTTCTTTGAATTATTCTTCCTCTTTCGTTTATTCCACACTCCAGTTACTACTCTTTTCAATCCGGTTAGGGTTTCTTTCCTCTCATAATAACGTGGATGGATTAATTGGACCTCAGTGCTGTTACTGTTACCTGTGCCTATAATAATGAAACTCATGTGCTGGTGTTGAGCTTTTGTGGCCATTTGTTTGGCATTTTCAGGA…
Gma.4235.1.S1_s_at	U12150.1	At2g02100	3e-09	Disease & Defense			AATGGTGGCAGAAGCAAGAACTTGTGAGTCTCAGAGCCACCGTTTCAAGGGGCCATGTTTGAGTGACACCAACTGTGGCTCTGTTTGCCGAACCGAACGTTTCACTGGAGGACACTGCCGTGGCTTCCGTCGCAGATGCTTCTGCACCAAACATTGTTAATTTTAAAAAATTAATTAAGAGTGCTTTGATAGAAGATGATAGATCTATCATCTTTCTACTCGTGTTGTTAATTAACCACTTTGTGATATGAGAATAAGGGTTACCCATTCTACTATGGGTTTCTTTGTTTGCCTCTTATTTTATCTA
Gma.4265.1.S1_at	CD407325	At1g20850	1e-147	Disease & Defense			TATTGTAGAAAACGGTGGACTCCACAAAGAGGAAGATTATCCTTACATTATGGAGGAAGGTACTTGCGAGATGACTAAGGAAGAAACCGAAGTTGTNACCATTAGCGGGTACCATGATGTGCCACAAAACAATGAACAGAGCCTATTGAAGGCACTTGCAAACCAACCCCTCAGTGTGGCCATAGAGGCTTCAGGCAGAGATTTCCAATTTTACAGTGGGGGTGTTTTCGACGGGCATTGCGGAAGTGACTTAGATCATGGTGTGGCAGCTGTTGGATACGGAACTGCGAAAGGTGTGGATTATATCATAGTGAAAAATTCATGGGGATCTAAGTGGGGAGAGAAAGGATACATAAGAATGAGGAGGAACATTGGAAAACCCGAGGGAATCTGCGGTAT…
Gma.413.1.S1_at	BQ611370	At1g71695	1e-77	Disease & Defense			ATGCTACTATAAAGTTGAGTCAATTGGATGTGCTCACTGGA
Gma.413.1.S1_s_at	BQ611370	At1g71695	1e-77	Disease & Defense			GGACAAAACCCTAGCCAAGCAACTACAATCCACTTGCCCCGACGCAAACTCCGGCAACACCGCCAACTTGGACATCAGAACCCCGACTGTGTTCGACAACAAATACTACCTTGACCTAATGAACCGCCAAGGGGTGTTCACCTCTGACCAGGACTTGCTCAATGATNANANGACNTAAGGGGTTGGTCAATGCATTTGCGTTGAACCAAACGTTGTTCTTTGAGAAGTTTGTGGATGCTACTATAAAGTTGAGTCAATTGGATGTGCTCACTGGAAATCAAGGTGAAATTCGTGGCAAGTGCAATGTGGTGAATGCTAGGAAGTCTTTGTTGACGTCTGTGGTGGAAGAGGTGGTGCAATTGGTTGATCAGTTTTGAATGGAGCAAAAGTTTGTAAGTT…
Gma.4189.1.S1_at	AF039027.1	At4g21960	1e-151	Disease & Defense			CAACAAGCACCATGAGGAGCCTTAATTGCTTCCCGCTTAATTTGGGCCTTGAATTTTCTTCCCCTTCTCTATGTGGAAGAAATCTGTAAGATATTATGCAAAAAATAATTAAGGTGTTTTTCTTTAAATGGGTTGGTTGATTGGTTCAATGAACCGATCAAGACCACAGCAGGTTCATGGGGATGCGAGGATTAAGACGCTTTGTTTTTTAATCTTCCGATGTCACTCTTGTTTGTTAGTTTGTTTTTTTATTTTTTATTTCAATAAGTACTGTGCAAGTAGGTTAGAGTTGGGTAGAAGGGCATGTTCATGGTGTTAATTACTATGTTATGTATGCATGTGAGTGCTGCTATCGATGGCAAGATGTCAATGTATGCGTGTAGTGCTGTTATCGATGAG…
Gma.4362.1.S1_at	CD405619	At3g11630	1e-107	Disease & Defense			AGTTGACAGTGTGTTCTCGCACCTTGCATGGATCCAAACAGATAGAAAGTCAGGTGGCCTTGGTGACTTGAANTATCCTTTGATTTCTGATGTCACCAAATCCATATCGAAATCTTATGGTGTTCTCATTCCTGATCAGGGAATTGCATTGAGAGGNTTGTTCATTATTGACAAGGAAGGGGTTATTCAGCATTCTACCATTAACAACTTGGCAATTGGTAGAAGTGTTGACGAGACAAAGAGAACTCTCCAGGCCTTACAGTA
Gma.430.1.S1_at	CD403334	At4g16190	1e-140	Disease & Defense			TCTGGTGCTTATGCTCCAATTCGTTTTAAGGAAAAGCCTTACTGGATCATAAAGAATTCATGGGGGGAGAGCTGGGGAGAAGANGGATATTACAAGATCTGCAGAGGTCGCAATGTATGTGGGGTGGACTCGATGGTCTCAACTGTNGCTGCTATACATGTTTCTAACNATTAAATATAAGGATGGATGCCTAAACNTGGTAGGGGCACCAGTATAGTNTGTATGTAAATAATTTNCANGATGTANNATGTTATGNAGGAGGAAACTGCTAAGCNCATGTTTATGCTTTTATNCTGTAATTCTCTATGCTAGCTAGTCTAGCNACAAATNATTACCCACNGTTATNNANNNNNNANTGCAAGTAACCTGAATGAAATTAAT
Gma.4312.1.S1_at	BM523337	At2g43350	3e-74	Disease & Defense			AGAAGCTCTTGCAATCTTGAGTACTAAGATTTTATTCTACATATCTAATGTGCTGAGGACATAGGCAATCTGTCCGGTGTCTTCGAAGGACAAGTAGCAATATGTATCATCAATTAATATAATGCCCTGAA
Gma.4312.2.S1_s_at	AI939064	At2g43350	3e-36	Disease & Defense			GTTTGCACAAGGTTCAAGGCTGAATTTCCTATCT
Gma.4312.2.S1_x_at	AI939064	At2g43350	3e-36	Disease & Defense			GTTTGCACAAGGTTCAAGGCTGAATTTCCTATCTTTGATAAGGTNNNNNNNNNNNNNNNNNNNNNNNNNNNNNNNNTGAAGTCAATGGGAAGAATGCAGCGCCACTTTATAAGTTTTTAAAGGAGCAGAAAGGGGGAATATTTGGTGATGGTATCAAGTGGAACTTCACAAAGTTCTTAGTANACAAAGAAGGGAAGGTTGTGGACAGATANNNANCTACCACCTCACCTCTGAAAATCGAGAAAGACATAGAGAAGCTTTTGCAATCTTGAATAGTAAGATTTGATTCTACATATCTAATGTGCTGAGGNNANNNNNNNNNTNNNNNNNNNNTNNNNNNNNCNAGTAGCAATATGTATCATAAGTTAATATATGCCCTGAAAAGTTCTTAATGTATCT…
Gma.4312.3.S1_a_at	BF424240	At2g31570	5e-43	Disease & Defense			CATCTACTCCTTCCCTCATGGCTGAGCAATCTTCCAAGTCCATTTACGATTTCACAGTCAAGGACATCAGTGGAAATGATGTGAGTCTGAATAATTACAGCGGGAAGGTTCTACTGATTGTGAATGTCGCCTCACAATGTGGTTTGACACAGACAAATTACAAAGAATTGAATGTATTGTACGAGAAGTAC
Gma.4312.3.S1_at	BF424240	At2g31570	5e-43	Disease & Defense			GCAACACCGCGATATGAACGATGCAAAATAGTTTCAGATACGTCGCGTTGATTGATTGATATGAAGTGGTTGACTTTCTGGAACTGCATATCTATCCTCGTGTTGTCTTTTGCTTTCTTC
Gma.4330.1.S1_at	CD396375	At1g65870	5e-36	Disease & Defense			GGAGCGTTCTCTGAGCAATCAATAATCAAGTTACCCACAGACCAACCAAGGGTAGAGAAACTGACCCACTTGCATTTTTTCTACCACGACATCTTAGAGGGCAAGAACATCACGGTGGTGAAAATCATCGAGCCATCAGCGAGCGAGGTTCGTGAAGCAACTGGGTTTGGAACCACTTTCATGATGGACAATGTTTTGACCGAGGGTCCAGAGCTGAGCTCGAAGCACGTTGGGAGGGCTCAGGGGCTGTTTGGCTTGGCCTCTTTGGAGGACCGTGGAATGGTGATGCTCATTAACTTGGCTTTCAGTGAGGGTGAGTATGCTGGCAGCACTCTCAGCATGCTTGGGAGGAACCCTGTTCAGGACACTGTTAGGGAAATGCCCATTGTTGGAGGCACG…
Gma.4604.1.S1_at	CA802306	At4g14710	5e-94	Disease & Defense			ATAAAGGGTCCTGGCTTGTTATGCCTTGATGTACCCTCGCCAGTGTTTTTGTTGCCTGTCCCTGTATAAAGATTGCATTGTATTATTATTAGAATTGGGTACAGAATAAACATAAGCATATGTTAGTATGCTGATGTATATTTATG
Gma.4604.2.S1_at	AW317203	At4g14710	3e-93	Disease & Defense			GATTGCAATGATGCTTGGATTCGAGTGTGGGTCAAGAAAGGAGGAATGATCATCTTACCTGCTGGAATTTATCATCGCTTTACACTAGATGAGAGCAACTACATTAAGGCTTTGCGTTTTTTTGTTGGTGAGCCAGTTTGGACTCCACACAATCGTCCAAATGACCATCTCCCTGCAAGACAACAATATGTCAAGGATTTTGTGGAAAAGGATGTTGGCAACCATGCTGTTGATGCCGCCGCGTAAGATCTGGTTCCGCCTAATCGTAGTACGTGGGACTGAGACTTTGTGTTGCTAAAGTAAGGTTTGAACAAATGAAAATAATGGTGCCTTTAAATAAAGGGTCCCAGCTTTTTATGTTATGGTTTTTGTGTAGATGACCCTTTAAGCCTTTTACCC…
Gma.5141.1.S1_at	BI971102	At2g30210	3e-42	Disease & Defense			GAGGATCACCCTATGCATATTCATGGATTCCACTTCTTTGTAGTTGGTTCCGGCTTTGGCAACTTCAACCCAGCAACAGATCCTGCAAGGTTTAACCTTGTAGACCCACCTGTGAGGAACACCATTGGAACACCACCAGGAGGATGGGTGGCCATTCGTTTTGTGGCTGATAATCCAGGAATTTGGTTCTTGCATTGTCACATAGACTCACATCTGAATTGGGGTCTGGCAACGGCACTTTTGGTAGAGAATGGAGTTGGTCCATCACAGTCAGTTATTCCTCCACCCCCGGATCTGCCTCAGTGTTAAGATCAACAAAGCATCATTAGTCATAAATTTTATGTTCCTCAATTATTGGCTTGTTGTTTTACGAGGTCTTTAAATACTTGCTAAATAGAC…
Gma.4928.1.S1_a_at	AF002259.1	At1g51680	0	Disease & Defense			GCTGCTGTTGTTCCAATGAAGGATGAAGCCGCGGGAGAGGTACCTGTTGCATTTGTGGTCATATCAAATGGTTATACCGACACAACCNAGGATGAAATTAAGCAGTTTATCTCCAAACAGGTGGTGTTTTACAAAAGAATAAACCGAGTATTCTTCATTGATGCAATTCCCAAGTCACCGTCAGGCAAAATCTTGCGCAAGGATCTAAGAGCA
Gma.4999.1.S1_s_at	CF921017	At3g07230	9e-15	Disease & Defense			CATCTTTGCCATCAGTAAACGACAATGATTTACGACGTTAACTCTCCTCTTTTCCGATCCTTCCTCAGCCAGAAGGGAGGCTCCTCTGATAAGAGGAAATCGGACGAACAGAAGCCAAAAGAGCAGAAACCCAAAGCCAGCGAGAACAAACCTATAATGACTGAGTGATAACAGCTGAGCTGCATTCAGTTGTAGAATGAAAATAGGTGGTAGGTATTGTATTTGGTGCTAAACTAAGATCTTTTTGGCTGTGTTCTGAAGTATATGCCGGCGATGTTGGTCTTTGTTATTGTAATGGTTTGATTTTGGATATGGTTATAACGAAAACTTATAATGGACACAAGTTGAACTTGATGCACGCATGACACATGCAAT
Gma.5039.1.S1_s_at	AF243363.1	At3g09270	1e-62	Disease & Defense			TTGGAGCCAAGAATTTTTGAACCATCCAATTGTCAAAGAAAGTCTGCCCCCTAGAGATCCTGTTTTCTCCTTTTTCAAGGGTCTCTATGAAAGCCTTTTTGGTTCAAAATAGATTTGATGATGTGGTGTGAGACTTAGTATTTCTAAGAATTATGTGTTTGTTAAAGGCTTCTATGAAAGCCTCACTGCTTCAAAATAGATTCATGTATGTGAGACTCAGAATCTCTGGGGAAAATTGTGTGTGGTGTGGACTACTTGTTTTGTTTGTCATTGAGCTATATCGCTGTTAATTAGGATTTTGTTTCAAAATGATGCTTATAAGTTGTAATCTAGGATTTCTCCCTTTGAA
Gma.5401.1.S1_s_at	AW351217	At1g60740	4e-61	Disease & Defense			ACAAGCATGTTAAGTTCCTTGCTGATGGTGCAGCCAAATACACCAATGCCCTNGGTCTTGAGCTTGACCTCACNGACAAGGGTCTCGGCGTCCGCTCAAAGAGGTTTGCTNTGCTGGTGGAAGACCTCAAGGTGAAGGTTGCNAATGTTGAAAGTGGAGGAGAGTTCACCATCTCCAGTGCTG
Gma.5576.1.S1_a_at	CD417924	At3g10920	4e-92	Disease & Defense			TTGAGATGACAGATTTGCAGCACGGTAAGAGATGTGGAATAAAATGATNNNATGNNATGTAATANATANCACTANNNNTTTTATGTAGTTGTACTGAAGAACCTCGAGCAT
Gma.5576.1.S1_x_at	CD417924	At3g10920	4e-92	Disease & Defense			TGTGGCTTGGTCTGGACAAAGAGTTGAAGAGGCTTGTAGTTGAAACCACTGCCAACCAGGACCCACTGGTTACTAAGGGACCAAATTTGGTTCCATTGCTTGGTATTGATGTTTGGGAGCATGCGTACTACTTACAGTACAAGAATGTTAGACCAGACTATCTNAAGAACATTTGGAAAGTTATTAATTGGAAATATGCCAGTGAAGTGTATGAGAAAGAGAGCTCTTAGTCTGAANGNGCTACTTGATATAGCNNTTGAGATGACAGATTTGCAGCACGGTAAGAGATGTGGAATAAAATGATNNNATGNNATGTAATANATANCACTANNNNTTTTATGTAGTTGTACTGAAGAACCTCGAGCAT
Gma.5947.1.S1_s_at	BQ610509	At1g24020	0.002	Disease & Defense			GTGACCAAACCAGTTTCGTGCTGCAAAAAGTGGATGCAATTGACGAGGCTAACTTGGTATACGACTACAGCATAGTGGGAGGGACGGGGTTGCATGAAAGTTTGGAGAAGGTTACATTCCAAACAAAGGTGGTTCCTGGCACTGATGGTAATGGCTCTATCGCCAAGGCCACTCTCACATTCCACACCAAANNACGATGCACCACTCTCAGATGCAGTGCGTGATGAAACAAAGGCCAGGGGTGCTGGAATTTTCAAGGCCATTGAGGGCTACGTTTTGGCAAATCCTGCTCAATGATTATCCTTCAAACCACTTGCATGCATGCAATAATAATTATATAAGCTTATGATCTGGTTGTTGGAGTTAATTTGTATCATGTGGCTTTGTTTGGTTTAATTA…
Gma.6075.1.S1_a_at	AW317183	At3g11660	8e-74	Disease & Defense			TTGGTTCAACGCTGCACCGTCGGGGTTTGATGT
Gma.6075.1.S1_s_at	AW317183	At3g11660	8e-74	Disease & Defense			ATATACGTATTCTTCCTATCTTCCTCTACGTATTTCTTCTACGGATCACTTTGTTGTTAGACATACATATGTCTGTCTTCGTTACTGTATTT
Gma.6091.1.S1_at	AW310762	At4g35000	1e-102	Disease & Defense			TTTGATGGCCCTTGGACGGAGGACCCTCTGAAGTTTGATAACTCATACTTTGTGGAACTTTTGAAAGAAGATTCTGCTGGGCTGCTTAAACTTCCAACAGACAAGGCTTTATTGGAGGATGCTGAATTTCGCTGTTATGTTGAGCTATATGCAAAGGATGAGGATGCATTTTTTCGAGATTATGCTGAATCACATAAGAAACTTTCAGAGCTAGGCTTTGTGCCAAGTTCAAAGCCGATTTCTATTAAGGAAGGGACCATACTGGCACAAGGTGCTGTAGGAGTTGTAGTTGCTACCGCAGTGGTGATCCTCAGTTACTTGTATGAAGTTCGCAAAAGAGGGAAGTAAACTGGATTTGTTCATCTCTTGGCTGTTACGGTTGCGTGACCCTGACCCTGA…
Gma.5971.1.S1_at	BQ610718	At5g66390	1e-110	Disease & Defense			GACCAGAATCTCTTTGTCCTAGACTTTGTTACCCCAATTAAATTTGACAACTTCTATTACAAGAACTTGNTGGCCAACAAGGGTCTCTTAAGTTCTGACGAAATTCTCTTGACAAAGAATNAAGTATCNGCGGATTTAGTGAAGCAGTATGCAGAAAACAACGATNTTTTCTTTGAACAATTTGCCAAGTCCATGGTTAAGATGGGAAACATTACTCCTTTAACAGGGTCAAGGGGNGAGATCAGAAAGAACTGCAGANGAATTAACAAGTGATGNAGTGATATCATTGTCATGTNNCACGTGTGANAGTTGCACCTACANTTTACTTTTCTTNNCTNTTGTTTACNGCATTAAAAAANAGGAGTGTCNATTGATCNATTCTGTGGTGAGTTGAGNAAG…
Gma.6287.1.A1_at	BI969411	At5g60920	1e-34	Disease & Defense			AGGGTCTACTTCAACGGTGACAACTGTGTAATGCCACCACCTGATTCTTATCCGTGGTTACCNAATGCTGGTGCTAGGCAAGAGGTTTCCTTGTTTNCTTTAGTGATAGCATCTTTGGTAGCCTTGGTATTTTATGCNCNCGCATAAAGTTTCAATCTGTGNNGTACANTTAGNCTTGTAATAGAAAATTTTCAGTCAGANCAGTTTTGACTCATCTNTGATGTCAATTTGGTATTTGAAGCATATGGGAGGATGACATCCAAGATTAGNTCACGTGTCCNATGATTTGTTACNAGAGGATTNACATTGGTGGTAGAATTTGCTATTGTTGTGTTTGTTGTA
Gma.6231.1.S1_at	CD395324	At1g17860	2e-13	Disease & Defense			AGGGTTCTGGTTTGTGAGCACCAGTGGTGACCCTAATGATATCACTAGCAAGTTCAAGATTGAGAGGCTTGAAGGGGATCATGCTTATGAGATCTACAGCTTCAAGTTCTGCCCCAGTGTGCCTGGTGCGCTGTGTGCTCCTGTGGGGACTTTTGAAGATGCTGATGGAACCAAAGTCATGGCTGTGGGGGATGATATTGAGCCTTACTATGTGAGGTTTCAAAAAGTCTCCATCTTTG
Gma.6299.2.S1_at	CD397742	At1g04340	2e-32	Disease & Defense			TTGATGCCCGGCAATTCATTGCTACNATCATATTTCTTAAGGGGGTNGGAGGGATTTTGTTTGTGTTTGGNAGCACATTTGGATCTTTCNTACTGCTTTTGCATCTGGCNATTACTACTCCACTTCTGTACGATTTCTATAANCNATAGNCCCGGCAAGCCTAAGTACAATCAGCTGCTGAATGATTTCTTGCTGAACACAGCACTTTTTGGGGCATTGCTATTCTTTATTGGAATGAAGAACTCAATTCCCAGGAGTCAGCTCAGGAAGAAGACCCCTAAAGCTAAGACAGTTTAGAAAAAATAGAGCANNNGATGTATTAGTGTGCCAAAATGCTTAGTTTCGGCATTAAGTATTTGATCTTCAGCTGAGTTTGGAATAGTTACTTAGACCTATTAA…
Gma.6299.3.S1_at	BU547701	At4g14030	0	Disease & Defense			AAAATCCTAAACTGACTGGACAAGTATGGGTTGGTGGACTTATCCAGAAAGGAAGCCCTGTAGTAGCTATAACTGATGATGGTGAAACATGGCAAGCTGAAGTTCCAGAGATTCAGGGAAACAAGTTGAGAGGGGGCCCTCAGATGATTCAATTGAGTTTAGATGGGAAGCGGCTCTATGCTACCAACTCACTATTTAGTACTTGGGACAAACAATTTTATCCAGAGCTTGTCCAGAAAGGCTCCCACATAATACAGATTGAT
Gma.6332.1.S1_at	BG237174	At5g63380	4e-33	Disease & Defense			ATACAAGGGCTACCAGGTTGCTCCGGCAGAGCTAGAAGAGTTACTCCTATCTCATTCAGAGATAAATGATGCTGCAGTTATTCCATACCCTGATGAAGTAGCAGGCCAAGTGCCCATGGCGTTTGTGGTGAGACAACCTCAAAGTTCNNTTGGCGCAGCAGAAGTTATTGATTTTGTTGCCAAACAGGTTTCACCGTACAAGAAAATAAGGCGTGTAGCATTTGTTAATTCCATACCCAAGAATGCTGCGGGAAAGATACTGAGGAAGGACTTAAAACTGGCGCTCTCTAGGTTGTAATATGCTTCATTTTCGTTTTATAAGTGGTGTTTGATTTAGTCTTTTGCTCCAAATGAAAAAAAAAAAGAAGAAGCAATGCGTGTGTTCAGTTTAA
Gma.6477.1.S1_at	AW309863	At1g71695	8e-79	Disease & Defense			TCTGACCAGGACATCGCGGGCAGCCCCAAAACCAAGGAAATCGTGAACCAGTTCGCTTCAGACCAGAAACTGTTTTTTAAGAAATTTTCCGATGCTTTTGTGAAGGTGAGCCAGCTAGATGTGATAACGGATCGTATTGGGAAAGGGGAGATTCGTGATAAGTGCTTTGTTGCAAATAAGAGAAGATCTTCTATGGCGTCTGTGGTGGAAGAAGTAGTGGAATTGGCTCAGGAGATATAATTGTATTGGGTCCTTTTGCTCAGGGTGTTCTTTTTTGTTTTTCTGAATGGATTGTGTAATAAACGTTGATATGTGTTTTCTTTTCTTGTTGTCTTCTCATAGATCATTGCTTTGGATTGGTTCAAAGTTTAACCAGTATAACATNNACAAGGCAAAAGT…
Gma.6384.1.S1_at	BI968043	At2g28190	3e-69	Disease & Defense			TTGACACATGGTGCTCCTGAGGATGAAGTCCGTCATGCGGGTGACCTGGGAAACATAGTTGCTAATGCAGAGGGGGTTGCAGAGGCTACAATTGTGGATAATCAGATACCACTCTCTGGCCCTAATTCAGTAGTTGGAAGAGCCTTGGTGGTCCATGAGCTTGAGGATGACCTTGGAAAGGGTGGGCATGAACTCAGTTTGACAACTGGAAATGCTGGTGGAAGATTAGCGTGTGGTGTGGTTGGTTTGACTCCAGCATAAATAGTGAAGCAAATGTTTTTGTAGCAGTCGTGTTATTTTATCTGATGTTATGTCTTCTGTGANNGCATGATGACTCACGTTCTTACTTTCTTCAGTTACCAATGCAANCTGTAAAGCANAATGTCCTTCTAANGATNA…
Gma.6533.1.S1_at	BM526206	At4g39090	1e-140	Disease & Defense			GAACTTTATCATTTGGTACTGGTAAAATTATCTCCGTATAGGATCAGGAAACTGCTAAGACCATGTTGTTTATGTAGTATGTAATTTCTGTATGTATGCTTGACATATACAAGTGGGAAATCCAAGGAAATGTGTGGTCCTAAAAATGGTGCAAGATAAGCAACTCTCTATGGAGATTGGCGGGGTGGGGTTGTTTCAAACTGCAACAGGGGAATACTTGCCACTGATTATGTCTCAGTTATTGCATAATTAAACTAATATACGTGCCACTGTCAATGTTGGTTCTTATGGATGTGGTAGTGCCATACCCAAAAGGATACCAAAATGTTTAAGTTGCTTCTGTACCTTTGATTCGTTTACCTTTGAGTTTGTGCATGT
Gma.6564.1.S1_at	BQ613091	At2g18980	7e-48	Disease & Defense			TCGCCAACCGACAGGGTCTGTTTACCTCGGACCAGGACCTGTTCGGTGATGCCCGGACTAAGGGAATAGTTAACTCCTTTGCTGAAAACCAGAAACTGTTCTTTGAAAAGTTTTCAAATGCTGTTGTTAAGTTGAGTCAGNTGGATGTGTTGACCGGGAAACAAGGACAGATTCGCGCCAAATGCTCCGTCCCCAACAAGAAGAAGGTGGTCACCTCTGTGGTGGAAGAAGAGGGAGTGGATTTAAGCGCTCAGATGTGAGATTAATTAAGGAATGTTTGTTTGTTAATAAATTAATGACCATGTTTCGTAGTAGACTAGTAATGTGATGTACGTCAGTTACATAAAAGGAGTTTCTCCCGTGTTACTACCTGCATTCCTGCAATCCTTAATTTCTATG…
Gma.6633.1.S1_x_at	U89693.1	At3g09270	3e-21	Disease & Defense			ATTTTACTGCCATAAAGTCCGTGAAACAACAGCTTTCNATGGTTCCATTGGTGGCTGGTGATGGAACCAAAACTCAGGCACTTGCTGTTTGCCACTCAGATACTTCTGGAATGAATCATCACATGCTTCATGAACTCATGGGAGTTGATCCTGGAACTAACCCTGTTTGCCATTTCCTTGGAAGCAAGGCCATTTTATGGGTACCCAATTTATCTATGGACACTGCCTATCAGACTAACGTTGTTGTTTAATTAGTCCATGCATCTGCATCTTGGGCACCATAAGATTGTATATAAAATAAATTATGGTGTGTTGTGTATGTTGTGCAAGACCTGGAACTTCACCTTTCTACGTACGTGTGCTGTTAGGATGCAGTGTGCTTTGATGATGCTT
Gma.6999.3.S1_s_at	CF921432	At1g24020	8e-05	Disease & Defense			CTAATCCAATTCGATCAACTTCATGATTATCATCACTATCTCTCTTGCTTTTTCTGAGACTTCATATATCTGTA
Gma.6803.1.S1_a_at	CF922291	At2g15970	7e-28	Disease & Defense			CACCATTTGGACTTGGTTGATATGTGAGAATTAAACCAAGTGTCTTCTGTATCATTCATTTGTTGCAACTTGATATCTATAAACACCCGGCCATTGT
Gma.6803.1.S1_at	CF922291	At2g15970	7e-28	Disease & Defense			ACCCGGCCATTGTTTTGTGATTCATGTTTGTCCTAAGACCTAAAGTTAGCATGTGTTAAAAAGTGGAATAAAATCTCAGTTTAAGTCCTCTGGTTTCATAGAATGTAGAAAACAAAAGATGAAGAGGATTGATGTGGTGTCTTTCTAGCTGTCGTGTATTCATAAATCATGTATGATTTGGGAAATCGTTGTATTTTTACCTGTGGGATATAA
Gma.6803.2.S1_s_at	BU082740	At2g15970	2e-53	Disease & Defense			GGTTTCAGAAACTCCTTCACTAAAGCTCACGGCATATCAAATTCCATTGGCATAATACTTCTGTTGGTTTATCCCATCTGGGCGCTGGTGGTCATACTTTTTTAGGCACCACCATTTGGACTTG
Gma.7542.1.S1_s_at	CD402549	At1g32210	7e-53	Disease & Defense			GGATCATTTCCATTTAACTCCTTCCTATCAGGAGTACTTTCTTGTGTAGGAACTGCTGTTCTTGCTGTCTGTCTCAGGATCCAAGTGAATAAAGATAACAAGGAATTCAAGGATCTTGCACCTGAGCGTGCTTTTGCGGATTTTGTTCTCTGTAATTTGGTGCTTCATTTGGTGATCATGAA
Gma.8144.1.A1_at	BU548599	At5g05340	5e-32	Disease & Defense			AAAGTCTAACTGTCCAAGCACTGGCGGAGACAGCAACCTTTCCCCACTTGATGTCACCACAAATGTTGTATTTGACAATGCTTATTTCAAGAACCTCATCAACAAAAAGGGGCTTCTACATTCTGATCAGCAGTTATTTAATAGTGGTGGTTCTACAGATTCTCAGGTCACTGCCTATAGCAACGACCCTTCAGCTTTCTATGCAGACTTTGCTAGTGCCATGATCAAAATGGGAAACCTTAGCCCCTTAACAGGGAAAAGTGGCCAAATTCGTACTAATTGCCACAAGGTTAATTGATTAATTACAGAAATAATATGAGCCAAAGACACGCTCATTCAGTCACAATACGTATGGCCTAGTTTATGTTTAGTGATAATAATCTAAGAATATAATATTGA…
Gma.9010.1.S1_at	CF921194	At1g70890	1e-23	Disease & Defense			GATAAGGATCAAGGCGGTGCTTTTATTAAATGGACGGTTGAATATGAAAGGCTTGCTGAGGAGGTTGATCCTCCATATGGATACATCGAATACCTGCACAAATGCACTAAAGATATTGATGTTCATCTTCTCAAAGCATAGCTCTAAAAGTTATGCACTAAGAAATAATGGGCTTGGCCTCTGGATAAGTGCTTATATGTATAATAATCGGTGTGGAGTTTGACGAGAAGGATGCTTATATAGATCCTTCCTTTGTATGGAATAAACTTGGATATGCATGTCGGTGATGTCTTGTATGTGTTAAATTATATATGTGGAAGTGCTCAACGTGATACATATGAATATTAATGAATGTTTTATGATCGATTTTGCTA
Gma.8824.1.A1_at	BU765628	At1g49570	1e-14	Disease & Defense			ACCAGGCTCTTTTGGGTGACAGCACCACTGCTTCACTGGTCAACACGTATAGCAAGTGGCCTCTTATGTTCTTCAGAGACTTTGGAATATCTATGGAGAAAATGGGTCGCATAGGTGTACTCACAGGATCACAGGGGCAAATAAGAACAAACTGTAGGGCTGTTAACTAGATATATATCCGGCCATTTGCATTTGCTCTTTGTTGGCTTTTAGAAAACTTTGCAGAATGCAGACTTCTATTATATAAATGTATAATAATATGCTAGGGCCTAGGAGCATGTTTGTGTGTTTCGATAA
Gma.8957.1.A1_at	BU764905	At1g70890	3e-34	Disease & Defense			TAATATCATACAGCCTCTTTGATGGGGAAATCAGTGAAGGTTACAAGAGTTTAAGGGGCACATTACAAGTGATTAATAAGGAAAATGGAGGAATTGTGAAATGGACCTTCGAATATGAAAAGCTGCAGGAGAATATCACTGCTGCATCTCCTGATTCTTTTTTGGACTTTGCTGCTAAGGTCACTAAAGATATTGATGATCATCTTGTCAAGGCATAGCAAGAAAAAAAAAGAGTGTGTGATTGGTGATGAAGTGGGTTTGGCTAGAGTTTTAATCCTTATTATCTAAATAAAAGCATCATTTAGTAAACTTTGGAATGCCGGATGTGTAATAATGATATATATGCTTCTTAGTGTTCCTTGTTTGTGATAGAATGCATGGATATGATGTTTGTTCGTT…
Gma.8518.1.S1_at	AF243362.1	At3g09270	1e-65	Disease & Defense			GTTGAAGAGTCATATGAGGCTCTGCAGTTTCTTGAGAATGAGCTGAAGGACAAGAAGTTTTTTGGAGGAGAGGAAATTGGGTTGGTAGATATTGCTGCTGTCTTCATAGCATTTTGGATCCCTATAATTCAAGAAGTATTGGGTTTGAAGTTATTCACAAGTGAGAAATTTCCTAAGCTCTACAAATGGAGCCAAGAGTTCATCAACCACCCTGTTGTCAAACAAGTCCTTCCTCCTAGAGATCAACTTTTTGCCTTCTACAAAGCCTGCCATGAAAGTCTTTCTGCTTCAAAATAGACTTATTTAAGGATAGTTGTGTGAACTACTGGTCTCTCATTTGTGAGTTATTGCAGTTTGAATTTCATGTCAATTTGGTTTTATATGTAATTTAGTAACCTG…
Gma.9839.1.S1_at	CA935357	At2g28790	4e-52	Disease & Defense			CACGGACCCGTGGTGGCTTGCAAGAGCGGGTGCGAGGCTTTTCACACGGACGAACTCTGTTGCAGGAANCACTTCAACAACCCTAACACGTGCAAGGGATCTATCTACTCCTCCTTCTTCAAGCACGCGTGCCCTGCCACCTTTACATTTGCTCATGACACCCCCTCCCTCATGCACCAGTGTTCCTCCCCGCGTGAGCTTAAGGTTATCTTTTGTCATTAATATTAGGGACCAACTACTAAGCTTTCTTGTGTTAAGAAGCCGTTTGGGTCATTGTTAAGTGACTCGACTCTTGTCTTTTCTAATAAGATTCGAACAAAACAGAAATGTAGTAGTCGTGTGTCTTTGTAATTTC
GmaAffx.10710.1.S1_s_at	AW278629	At4g30320	3e-55	Disease & Defense			TAGAGCACTCCAACGGACCTTACGGTGAGAACATTTTCTGGGGCAGTGGCACGGGGTGGAAGCCAGCACAAGCTGTTAGTGCATGGGTTGAAGAGCGCCAATGGTACAATTATTGGCACAATTCTTGTGCCAATGGACAGATGTGTGGACATTACACTCAGATTGTGTGGAGCACCACCAGAAAAATTGGTTGCGCTAGCGTTGTTTGCTCTGGTGGTAAGGGCACCTTCATGACTTGCAACTATGATCCTCCTGGGAACTACTATGGAGAAAGACCTTACTGAAAATTAATTATAAGAAGTGAGACAAGTCAATAATGTTCTAATAGGATCATAGTAGCTACCCATGTTCTCCGCTGGCATATTACTATTGTCTGATTGCCATGTGCCCATGTGCATG…
GmaAffx.40923.1.S1_at	BG653848	At4g14030	2e-06	Disease & Defense			TATGGATTTAAGCTTACGTGTCGTTATTTCCCTTTAATAAACGGTATCTGTCATATGGTTGTAATGAGCTATTATGCTTTATAAATAATGCTCCTGTGAATCTTCAACATTTCGAAGACAGTTTGCAGTTGCATAAATATATGAAGCTCGTCTCCAAAAAA
GmaAffx.43227.1.A1_s_at	CD416630	At4g11600	8e-15	Disease & Defense			GTTGGATGCATGAATGAAGCTATGAATGACTGGAGCTGCCAATAAATGAATTGTGATTAGAATATAAATTATGAATAAGAAATGTATTGCAGATGCTGCTGCAATTTCCTGTGTGCCTTGTATGTGTACCGAAACAGTTACTCTTGTAGCTCTGACATTAGGTT
GmaAffx.45690.1.S1_at	BG237455	At3g45310	2e-15	Disease & Defense			GCATCTTATCCTGTTGTGGCTTAAATGTATGCAGAGAGATGTGGTGCCCGATATGCCCGTGTAACTGCACCTTGCACGTCATGCTTCGTATCGTCCATCTTAAAGGGTGAAACATTGTACTGCGATAAAAATTTACAGTATATGTTGATGTTTATCTGTAAAATAAGTTTGGAATTGGGATGTTCATTCTNCTTGANCTNNATNNCATTACAAAATCGTACTGTAAATCATTTGTCACATAGAGGTATCATAGAAATTATAAACTGTGTTATGCTCCCCAATCTCTAGCAATGTAAGGATAGCGTGCTGTGTAAAATCTGCGCACACTTGAGTTATCATCAGTCCCAATGGAGTAAAGTTTATTTGGTTAGTCCATCTCAATATTACTTT
GmaAffx.46214.2.S1_s_at	AW351024		1.1e-35	Disease & Defense			GTGAAGTTCCCACTAGTGTTGGATTCAGTTGTGAGCACAATGGTTAAAAGGCCNAAACAAGTCGAGGAGCNNNAANGAGAANGAAGAGGAGGAAGAGGTTTTGGTGATTGAAGGGATTGAGTTTGAGAGAAACACACCTGTGAAATTTGATGTGTTTATCAATGATGAAGATGATAAGCAGATTCGACCAGATAATACAGAATTTGCAGGAAGCTTTGTGAGTGTGCCTCATTCACATATGCACAAAAACAAGGACATCATTACTTGTTTGAGGCTGGGACTTACGGATTTGTTGGAAGAATTGGAAGCGGAAGATGATGACAGTGTTAGGGTGACGCTGGTTCCGAGATATGGGAAAGGGCGTGTNAAAATCAGAGGCATCAAAATAGAGCTTCTTTC…
GmaAffx.46214.3.S1_at	BM094597		1.1e-94	Disease & Defense			GACTTCAATCTCGAGGATCCTATTTCCAATGGNAAAATTTCCAACAACCTCACCATAATGTATAGGCAAGTTGTGTCTAANGGGAAGACTCCTACNTTGTTCCTTGGAAATCCTTACCGTGCTGGGGATGAGCCTGACCCGGGTTTTGGATCAGTAGAGAATGTTCCACATGGCCCTGTTCATCTTTGGACCGGTGATATCAACCAACCTAACATTGAGAACATGGGAACTTTCTATTCAGCTGCAAGAGA
GmaAffx.46222.1.S1_at	BG650417	At5g62740	9e-18	Disease & Defense			ATAGGAGCATCGTCAAGGTCCTCGTCTGTGTTCATACCTCACGGTCCTGGGGNNGTTAAAGACATTGCCGTGCAAATTCGGGATGGTCTCCTTCAGGCCACTGCCTCACAGAATTAAGCTTTCTTGGAGTTGTAAATAACAAATAGTATGTGTGTCAGGTTTTTTTCAGGAAATGCTTCTTTTGTTTGAACTTATAAAGTCTGCATCTTTACTCTTCTTATATTTGATAGATTCATAGCAGTGTCTATTTTATGTGTAAGTACTGATGTGCAGTTTTGAATACTTGTTTAAGGATAGTCTTAATGTCAAGTTGCTTGTGAATCATTAAGGAATTTGTTATGTAAGAATTACTTCCCNAAANANNNNNNNNNNNNNNANTGTCCTATCTTGCAAGTGGAT…
GmaAffx.16271.1.S1_at	CA936304	At2g37130	1e-128	Disease & Defense			GAACATCTTGCAACACAAGGGTCTTCTNANTGTGGATGAAGAGCTTGCCACTGACCCAANAACNGCANCTTATGTCCAAAAGATGGCCAANGACAATGANTATTTCAACCAACANTTCTCAAGGGCCATNNTTTTGTTNTCNGAGACNAATCCTTTAACAGGAGATGAAGGNGAAATCAGAAAGGATTGTCGCTACCTCAATGCCAATTAAATATATAACATAAGGTTGCCCTTTGTGCATGATAATATGTATAATTAGCATAGATTATAATGCACGAGTGCGCCAAAATAAACGGGTGGGACGTACTGGGCCTAGGTTACCATATTCAGTGCAATACGCCATTGGGCCTAGCCTTATGTATACGCTTATGTTTGGGCTTTTACTTCCTGCACGTTCCC…
GmaAffx.13912.1.S1_at	BI699258	At2g01890	9e-65	Disease & Defense			GAAGTTCTACTACGATGGCCAAGGAGTCATGTCTGTGAAGGTCACTGAAACTGAAATTGACATAGTATTCTATGATGTCTATGGCCATGTTCTACACAAATGGAACACATCCAAACAGCTTCACGCAAGTTGGTGAACAAGTTCAAGATCGAATCCAAGGCATTTAATTATGAAACAAGAAAAGAAAGAAAAAATAAATCTCGGGGACAAGAAACAAAAGTGCATACAAGATAGGAAAAAACAATTGAGCCCTATCATCTCCCCATCTGGTTTGGCTTCATATTTTACACTATGCAATTGACTAAAATCTGTTGTATAATAGTATCTACGGAAAAAATTCTCTCCATTTCTTTCATTTTTATGATTTTGAAAAAATAAATAATGATATTTTCTATTTAA…
GmaAffx.93338.1.S1_s_at	CF809059	At4g16190	6e-94	Disease & Defense			GTCTTCAAGTCCAACCTCCGCAGAGCCAGGCTGCACGCCAAGCTCGACCCCTCCGCCGTCCACGGCGTCACCAAATTCTCCGATCTAACTCCGGCCGAGTTCCGCCGCCAGTTCCTCGGCCTCAAGCCGCTCCGCTTCCCGGCGCACGCCCAGAAGGCGCCCATCCTCCCCACCAAGGATCTCCCCAAGGATTTCGATTGGCGAGACAAAGGAGCCGTCACTAACGTCAAGGACCAAGGGGCGTGTGGTTCGTGTTGGTCTTTCAGTACGACGGGAGCGTTGGAAGGAGCTCATTATCTGGCCACTGGTGAGCTCGTGAGCCTTAGCGAGCAACAGCTTGT
GmaAffx.93393.1.S1_s_at	CF808604	At3g09640	4e-74	Disease & Defense			TCTTGACATCGCTGTTAGGCTTTTGGAGCCACTCAANGCGGAGTTNCCTATTTTGAGCTACGCCGATTTCTACCAGTTGGCTGGCGTTGTTGCCGTTGAGGTCACNGGTGGACCTGAAGTTCCNTTCCANCCTGGAAGAGAGGACAANCCTGAGCCACCACCAGAGGGTCGCTTGCCCGATGCCACTAAGGGTTCTGACCATTTGAGAGATGTGTTTGGCAAAGCTATGGGGCTTANTGACCNAGATATCGTTGCTCTGTCTGGGGGTCACACTATTGGAGCTGCGCACAAGGAGCGTTCTGGATTNGAGGGTCCCTGGACCTCTAATCCTCTTATTTTCGA
GmaAffx.93164.1.S1_s_at	CF808889	At3g09390	1e-08	Disease & Defense			GGGAGAGCAAGCTTCAAGCAGAGATAGCCCTTAATTAGGAATAATGATAAACTATTAATGTGTAGCTAAAAACTTATGTATTATGTCTGTGATGGTTTTCGTGCACTCTGGTGTTT
GmaAffx.93558.1.S1_s_at	CF807323	At5g49040	3e-35	Disease & Defense			TACTGGCACGAAGTCTTCAGCGGAGAAAACCCCACATCGGTTAGAATCATTCCCNCACTCCCCAAATACAACNCAACCACAACCTTNGGNTCNGTTGGNATCTTNGACANCNCTTTAACNGTGGGACCNGAGGTNTACTCCAAGGTTGTCGGAAAAGCCGAGGGCTTGTTTGCCTCCACGTCNCAAACGCAGTTNGANCTNTTNCTGATTTNCAACTTCGCNTTGACNCAAGGGAAGTACAACGGCAGCACCATCACGTTCACNGGGAGGAGCCCCCTCTCGGAGAAGGTGA
GmaAffx.92986.1.S1_at	CF808711	At5g02790	4e-77	Disease & Defense			AACGTGTGTGGATCGCTAGGAACTACAAGGGGCTACAAGATAAGATCAATTTGGT
GmaAffx.92986.1.S1_s_at	CF808711	At5g02790	4e-77	Disease & Defense			TTGTACATCAGTTATTCTTGCCCCTATGCACAACGTGTGTGGATCGCTAGGAACTACAAGGGGCTACAAGATAAGATCAATTTGGTCCCTATTAACCTTCAAGACAGGCCAGCTTGGTATAAGGAGAAAGTCTACCCTGAAAATAAGGTGCCATCCTTGGAGCACAATGGCAAGGTGTTGGGAGAAAGTCTTGATTTGATCAAATATGTAGATGCAAACTTTGAAGGGACACCTTTGTTTCCCAGTGATCCTGCCAAGAAAGAGTTCGGTGAGCAATTGATATCCCATGTTGATACATTCAGCAAAGACCTGTTCGTTTCATTGAAAGGGGATGCTGTACAGCAAGCCAGTCCCGCTTTTGAATACTTGGAGAATGCTCTTGGTAAATTTGATGATGGG…
GmaAffx.91200.1.S1_s_at	CF806925	At4g24190	2e-87	Disease & Defense			GAGGTTATTTTCTTCACGGATCCAGTTGATGAGTACTTGATGCAATACCTGATGGATTATGAAGACAAGAAGTTTCTTAATGTGTCCAAGGAGGGTTTGAAACTTGGGAAAGATTCAAAAGACAAGGAACTGAAGGAATCTTTTAAGGATCTTACCAAGTGGTGGAAAACTGCTCTTTCCAAAGACAATGTTGATGATGTGAAGATTTCCAACCGATTAGATAACACTCCTTGTGTAGTGGTGACATCAAAATTTGGTTGGAGTGCTAACATGGAGAGAATCATGCAGTCTCAAACTTTGTCAGATGCTAGCAAGCAAGCATACATGCGCGGCAAGAGGGTTCTTGAGATCAATCCTAGGCACCCTAT
GmaAffx.91208.1.S1_s_at	CF806933	At3g45310	5e-42	Disease & Defense			TGCAAATTCTCAGCTGAAAATGTTGCCGTTCAAGTCATTGACTCGGTCAATATCACCTTGGGTGCTGAGAATGAATTAAAACATGCAGTTGCATTTGTTCGGCCGGTTAGTGTGGCCTTTCAGGTGGTGAATGGGTTCCATTTCTACGAGAATGGAGCTTACACTAGTGACCTTTGCGGTAGCACTTCCCAGGATGTGAACCAT
GmaAffx.91508.1.S1_s_at	CF806158	At4g14710	1e-94	Disease & Defense			AGAACCCAAGGAGTTTGTCTCGTTGGACCAACTTGCTGAACTTGGAGTCCTTAGCTGGAAACTAGATGCTGATAACCATGAAAATGATCCAGAGCTGAAGAAGATTCGTGAAGAGCGTGGTTACACCTACATGGATGTTTGTGAGGTCTGCCCAGAAAAGTTGCCAAATTATGAACAGAAAATCAAAAGCTTCTTTGAAGAGCATCTTCACACTGATGAGGAGATCCGCTTTTGTGCTGCTGGAAGTGGCTATTTTGATGTTAGGGATCGCAATGAAGCTTGGATTCGTGTGTGGGTCAAGAAAGGAGGAATGATCATCTTACCTGCCGGAATTTATCATCGCTTTACGCTAGATGAGAGCAACTACATTAAGGCTTTGCGTTTTTTTGTTGGTGAGCC…
GmaAffx.91568.1.S1_s_at	CF805995	At1g65870	3e-38	Disease & Defense			TCGTCACTGCCAGTTACCATCAAAGCATCTCTCCAAGCCTTCTACGTTCTCGTGAGAAGCTCACGCACCTTCGCTTCTATTTCCATGAAATTTTTACTAGCGACAAACCCTCTAATCTCGTGATCGACCCCCCCAAGGTGGTAGCCGACTCTCCCCTTCCATTTGGGTCCCAAGTGGTGATCGAGGACCCATTAACAATTGGGCCTGATGTCGAGTCCAAACAGATAGGTAAGGCCCAAGGGTTTTACCTATCCGCAACCCAAAGGCCCGGTTTGGAGTTGGAGATAGTCATGGGGATGGCCTTGACCTTCTTAGAAGGCGAATTTAACGGTAGCAGTTTAAGTGTGTTGGGGAGAAACAAAATCTTCAATGAGGTGAGGGAGTTGCCTATTATTGGTG…
GmaAffx.7312.1.S1_at	AW459535	At4g24190	1e-06	Disease & Defense			TTATGATTCAGTTAAGACCAGCTTGGACATCAGTCCTGAAGCAACAGTTGAGGAGGAAGATGACACCGAATTAGAGGCTGAAAGTGATTCAAAGCCTGAAGCTGATGCGGTTCATGATGGTGATGTTGATGATGCNAAGGACGAGTTGTAGATTTGCATGACATCCACTATTTAATGACGGTGCTGTCGGTTCCCTTTGTTTTTCATGGTTTCAGCTTTAAGATAGACCGTAAAAGCCTTCTCTAGCATGAGTTTTTTATTTCACAAGTTGTTAAAGGAGAACATTAGTCTTACTGTAATCATACTATCCCTTGGAATTTTGCCGTACCATATCAGTCTTAACACAATGTTCAAGTTCCTAGAAAATATGCTTGTCTTTTTTATATTTTATTTTTAGCA…
GmaAffx.6635.1.S1_at	CD412718	At3g11660	3e-11	Disease & Defense			GAATATGTTATTGACACTTGTGGTATGTATACTCTACTCGATCCGATCCAGTGTATTTTTATAGGTACCAATTTCTTCTTCCACTGTTGTTATTGTACGTGTACCTTGTGTACGAATTGGTCGTTAGATGTTTCTATTTTACGTTTTGCTATAGAAATGTGAAGCAGACAAAAGAGTCTCAGATATAGCAAAATTACAAGATGCAAGATGGAGACTAAATGTAATTGAGCTACGATGGCAATAAAATTTCTTGTTTCNANNTNNNANAANAAANNANANNANANNNNNANNAAACGTCCACACGGTGTCATTATCTTTCGTTTTCTCAA
GmaAffx.70414.1.S1_at	BI943959	At3g05600	1e-26	Disease & Defense			GGCATCGTAGATGTACCGGTTAAGTTCNNNNNAGGTGGCGTTGACTTGGTGTACACTTCTCCGGGGATGAAGGAGTATATCCACAACGGTGGTTTCAAGAAAGATGTGCCAACTTTAGAGGAAGTGGTGGTGCAGGAAGGGGTTGCACACTTCAACAACCAAGAAGCAGCAGAGGACGTGAGCAATCACATCTACGACTTCATTAAGAAGTTCTGATTCTCATCAGTGCTTAATCATTCCATTATGTCCACAACTTTGTGCCGTTTTCTGTTTCAATCAACCCGAATAAAATCATACCGTTTTAGTGCGCGTCTAGATTGCAAATTT
GmaAffx.59534.1.S1_at	CD417706	At4g21610	3e-33	Disease & Defense			AGATGATGAAGGTCCACCTCCGGGATGGCAACNTCTCCCCGCTCAGCCACCGCCACCGCCACGTCCATCCGGTTGGGCTCAAATGGTTTGCGGTTCTTGTCNTCGCCTGCTTTCATATCCACGAGGTGCCAAACATGTCAAATGTTCATGCTGTCAGACTGTCAACATTGTATTAGAAGCTGATCAGGTTGGGCAAGTTAAGTGTGGCAGTTGTGCGGTATTGCTGATGTACCCATATGGTGCTTCACAAGTTAGATGTTCATCATGCCGATTTGTGACAGAAATTGGGGCACACAACAAGCGGCCTCCATGGTCTGTACAACAAAGGAAGCCATCTCCTCCAAAAACTGGTTGTTAGTGGCCTGTCCGTTGGCCTAGTAGATGGATCATCCT
GmaAffx.59462.1.S1_s_at	BI469429	At3g60280	5e-20	Disease & Defense			AGGGTCTCTTCCATTCACAACCTTAAACCTTTCTTTCTTGTAAACTTTATTGATTGATTCTGAGAATAGAACTAAGAGGGTATAGACATGGCTAGCGCAATTGCAGCTTCTTTTTTGGTTCTGCTTCTGGCTTTCCCCACTGTATTTGGAGCTGACCATGAAGTTGGTGACACTAGTGGATGGGCCCTCGGAGTTAATTACAACACCTGGGCCTCTGGGAAAACTTTCACAGTTGGTGACACTTTGGTGTTCAAGTATGACTCCACTCATCAAGTTGAT
GmaAffx.65968.1.S1_s_at	BE608057	At4g31870	1e-19	Disease & Defense			ACAAGACCCAGGCAGGTGTCGCAGTACGCGGAGAAAGGACGCTATATAAATATATTTGTCCCCGATGCTCTCTATTTCAGCCACTCGTATATTCTTCCTCCGCTCAACAACTATAAGATTATCTTCTTCTTCTTCTTCTCTTCAATTCTTCTCCAATCCCAACCGCACCCTCTTCCGTCCCTTTCTTCACACTTCCTTCAAACCACTTCCTTCGTCTTTCTCTTTCCGAACAGATCACACTATGGCCACCTCAAACGCCAAATCAGTCCATGATTTCACCGTTAAAGATG
GmaAffx.5264.1.S1_s_at	BM521512		4.1e-29	Disease & Defense			GTTGGTGTTTTGTACATCTAATGATGATAGTTCGTGTGGGGATATTGTGGCTCCCATCGATCGTGAAGGAAACAGGCCTTTGATTGTGACTCATGATCAGAATCATCCATTGTTGGTTCAGTTTCAGAAAGTTGAAGCTTATGAATCATCAACTGCATGAGTTGGCCTTGAAAAATCATGCACGTGCTTTCCGGAATTATTCCGATACTTTGGTTACTTGTAAGACCG
GmaAffx.88251.1.S1_s_at	BU964415	At3g05600	7e-56	Disease & Defense			AGCAGTGGTGTTGTTCTTGCACGGCTTCCCAGAACTCTGGTACTCATGGCGCCACCAGATTCTAGCTCTGAGCTCCCTCGGTTACCGTGCGGTGGCACCTGATCTCCGTGGCTACGGTGACACAGAGGCCCCTTCTACGGTGAACAGCTACACGTGTTTTCATCTGGTGGGTGATATCATTGCTCTCATCGACTCTCTGGGTGTGGACAAAGTGTTCCTGGTGGCTCATGATTGGGGTGCCATCATCGGTTGGTACCTCTGCTTGTTCCGACCAGACAGAATCAAGGCTTATGTGTGCCTCAGTGTC
GmaAffx.85114.1.S1_s_at	AW760844	At1g24020	3e-06	Disease & Defense			ACTCTTGCTGAAGGTTTAGGTTATGTGAAGCACCACGTAGATGCAATTGACACAGAAAACTATGTGTACAACTATAGTGTGATTGAAGGCAGTGCATTGTCGGAGCCATTGGAGAA
GmaAffx.86757.1.S1_at	BM567976	At5g28010	5e-26	Disease & Defense			ACTGGACTTATGTCATAGACGGCAAGGTACACACATGTCAGGAGAGTATTGAAGCCATTGATGAAGAGAACAAAACAATCAAATTCATGCTCTTCGGTGGAGATATTAGTCAGCACTACAAGAGCTTTAAGCTGATCTTTGAAGTGACTGATAAGAACGATGGCGGTGCTGCTGTTAAATGGACTCTTGAATATGAGAAGATCAAAGAGAATATTGATCCTCCACATGGCTACATGGACTACTTTGACAAATCCACTAAAGAGATGGATGCTTATCTTGTCAAGGCATAGCTCCTAAAATTATCAAGAAAATAACAACAAAGGAGTAATGGATTTGGCTTTGAGGATATATATATATATATATATATATATATATANNNNNNNNNNNNNNNNNNNNNNN…
GmaAffx.88762.1.S1_x_at	CK606334	At3g09270	9e-53	Disease & Defense			TTTCTGGTCCAAATTCATTGATGATAAGNNTNTNGGTGCTGNATGGAAATCNGTTTTCACNGNTGATGAGAAAGAGCGTGAGAAGAATGTTGANGAANCANNTGAGGNTCTNCAGTTTCTTGAGAATGAGNTNAAGGACAAGAAGTTNTTTGGAGGAGAGGANNTTGGGTTGGTAGATATTGCTGCTGTCTNCATAGCATTTTGGNTCCCNATNNTTCANGAAATNGCAGGGTTGNAGTTATTCACNAGTGAGAAATTTCCTANNCTCTACAAATGGAGCCAAGAATCCCTTAACCACCCTTTTGTGCAAGAAGTCCTT
GmaAffx.88993.1.A1_s_at	CK605690	At2g38380	3e-36	Disease & Defense			AACCACTCCTGATACATTGGACAAGAACTACTACTCCAATCTTCAGGTTAAGAAGGGTTTGCTTCAGAGTGATCAAGAGTTGTTCTCAACACCTGGTGCTGATACCATCAGCATTGTCAACAAATTCAGTAGTGACCAAATAGCTTTCTTTAAGAGCTTTTCGGCTTCCATGATTAAAATGGGAAATATTGGTGTGCTAACTGGGAAGAAAGGAGAAATCAGAAAACAATGTAACTTTGTTAACAAGAAATCTGCGGAACTTGATATAGGTAGTGTGGCATCCGAATCAGAAGAGGGTCTGGTTAGCTCAATATGAATGAATTAGGAAGAGTTTTATATACACTAGGAAATCATGTGATTGAAGGTTACCAATAAAGAAGCTATATATAGGCACATTAT…
GmaAffx.89649.1.S1_s_at	CK606251	At2g43350	6e-47	Disease & Defense			TATCTTTGATAAGGTTGAAGTCAATGGGAAGAATGCAGCGCCACTTTATAAGTTTTTAAAGGAGCAGAAAGGGGGAATATTTGGTGATGGTATCAAGTGGAACTTCACAAAGTTCTTAGTAAACAAAGAAGGGAAGGTTGTGGACAGATATGCACCTACCACCTCACCT
GmaAffx.89772.14.A1_s_at	CK606614		7.1e-32	Disease & Defense			ATTCAGTGATCTGCAAAGACCTTGTTTTATATTATATACAAGAGTTTTCTTGCCTTGTGTGGAGTGTTATTCAATCACTTTGAGTGTGTGGTGTGGCTTCCAATTGATGTAACGAGTGTTTCCTTTCTTATTTCCTTTTTCCACAGAATTGTGAGAGCCAGTTGATGTCTTTGTATGTCACT
GmaAffx.89772.4.S1_at	CK606338		1.1e-56	Disease & Defense			AATTATCATCAGTGTCTTGCTTATCATATACAAGAGTTTCCTTGCGTGGAGTACTGTTATTTAGTACTTTGTGCTCAAGTTTTAAGTTGGCTTTCAATGTAATGAGTGTTTCCTTTTATTTTCTTTTGCCTCAGAATTGTAAGAGCTAGTCGATATCTTTGTACCTCCTTCATCAATA
GmaAffx.89795.1.S1_s_at	CK606628	At1g24020	8e-10	Disease & Defense			GAGGATCCATTGTGAAGTCCACAAGCAAATACTATACCAAAGGTGATGAGCAACTCGCCGAAGAATATGTGAAGACTGGCAAGGAGAGATCTGCAGGTTTCACCAAGGCTATTGAGGATTTCATTCANGCTAATCCTGATTACAACTAATTAAGTCACCAATTATAATTATGTCTCAG
GmaAffx.90331.1.S1_s_at	CF806056	At1g70890	4e-23	Disease & Defense			AATAAAATCGGTGTGAAGTTTGACGAGAAGAATGCTTAGTTATGTAGAT
GmaAffx.90350.1.S1_s_at	CF809070	At1g05850	1e-78	Disease & Defense			TCCAGAATACATAGAGCAGAATGCCACCCTTGCTTTCCAGGCTGCNATTTGGAGATGGATGACACCAATGA
GmaAffx.90390.1.S1_at	CF806115	At1g71695	4e-96	Disease & Defense			GACTTGCTCAATGATAAGAGGACTAAGGGGTTGGTCAATGCATTTGCGTTGAACCAAACGTTGTTCTTTGAGAAGTTTGTGGATGCTACTATAAAGNTGAGNCAATNNGATGTGCTCACTGGAAATCAAGGTGAAATTCGTGGCAAGTGCAATGTGGTGAATGCTAGGAAGTCTTTGTTGACGTCTGTGGTGGAAGAGGTGGTGCAATTGGTTGATCAGTTTTGAATGGAGCAAAAGTTTGTAAGTTATGTGTAGTTCTTCTTGTGTGGTGTTGTTTAATTGCTAAGGATATGGGTGTGTTCTATTTTGGGGATTGTTGTTTCCTGTTTGACATATGACTCATGTAATAAGGATAAAGTGTTCAGTATTATGTGCTTCTATTTTGTCCATTTTCTCTTG…
GmaAffx.90214.1.A1_at	CF805939	At2g47380	4e-20	Energy			CCGAGTGTGGTTAAGGAGATCATAATTGGAATAACACTTGGCTTAGCTGCTGGTGGTGTGTGGAAGATGCACCACTGGAATGAACAGAGGAAAACCAGGACCTTCTACGATTTACTGGAAAAGGGTGAGATTACTGTTGTTGCAGAGGAACAGTGAAAATGTTCTTGTTTTGTTGCCTATGCTCTCCATTTATAGGCTTTTTTTTCCCGTGTTATATTCAATTGGCTCTTCAAATGTAAATGAGCCAACATACTATGAGA
GmaAffx.89881.1.S1_s_at	CK605731	At3g51030	5e-40	Energy			GGCCCCAGTTCTTGCAGAGATTGCAAAGAAAACTCCTGAATTGATCTTCCTCAAAGTGGATGTGGATGAAGTGAGGCCTGTTGCTGAGGAATATTCCATTGAGGCCATGCCAACCTTCCTCTTCTTGAAAGATGGCGAGATCGTGGACAAGGTGGTTGGTGCTAGTAAGGATGACCTTCAAGCCACCATAGNCAAGCATGCATCTGCTGTTGCTGCTGCTTCTTCTTCTTGAAGTGAAGTATCATAATATGAAAGAAGACAAAGAATAATGCATTTTAATGTTTTCAAGTCAGTTTGNATGTTTTCTCTATGGACATTGAGTTGGCAGAACATCGAGTGATGTATAAAAATAAAATTGTTGCATTGTCTTTTTTTCGTATGATTAAATGNCAATTTAGC…
GmaAffx.6490.1.S1_at	AW596567	AtCg00150	2e-73	Energy			TTAGTAGTTCCTATACCTGTCATGTTCCTTGGATTATTCACAAGCGGTATTCAAGCTCTCATTTTTGCTACTTTAGCTGCGGCTTATATAGGTGAATCCATGGAAGGCCATCATTGACCAGTTTTCTACAAAATANGTCCTTTTCGTTTAGCTTGCCGCACATATATTGCGGCTCAATATAATCTACTTAGTAAACATCTATATCTATCTACCTATATCTATATAGATATAGGTAGATAGATATAGATAGATATTCGATTAGCATATATTAGCATATATTAGTATATATTGGATATTCAAAAAAAAAANAANAAATAAAAAAATTAAGAGCCATAATTAGAATTCTGTATGATATTTACGTTTACGGCGTGTGATAAAAAGATACTATATAGAACTAAA…
GmaAffx.65693.2.S1_s_at	CA799713	At5g65690	1e-73	Energy			AAGGTGGTTGCTATGCCAAATGCATTGACCTCTCACGGGAGAAAGAGCCAGATATTTGGAATGCAATCAGGTTTGGCACAGTGTTGGAAAATGTGGTGTTTGATGAGCATGATCGAGAAGTTGATTACTCTGACAAGTCAGTTACAGAAAATACTCGTGCAGCTTATCCTATAGAGTACATTCCAAATGCAAAGTTACCTTGTGTTGGCCCTCACCCAAAGAATGTCATACTTTTGGCATGTGACGCATTTGGTGTACTCCCACCCGTTAGCAAGCTAAACCTGGCACAGACCATGTACCATTTCATCAGTGGATATACTGCTTTGGTGGCTGGCACA
GmaAffx.59019.1.S1_at	AW133348	AtMg00160	2e-73	Energy			AAGTCATCCCTACAATAGCCCCTTGTGATGCNNNNNAACCATGGCAACTAGGGTTTCAAGATGCAGCAACACCTATAATGCAAGGAATAATAGACTTACATCACGATATCTTTTTCTTCGTCATTCAGATTGGAGTTTTTGTATCATGGGTCTTGCTTCGTGCTTTATGGCATTTCAGGTCTAAAATGAATCCAATCCCTCAAAGAATTGTTCATGGAACAACAATCGAGATTCTTTGGACCATATTTCCTAGTGTCATACTAATGTTCATTGCTATACCATCGTTTGCTTTGTTATACTCAATGGATGATATTGTAGTGGATCCAGCCATTACTATCAAAGCTATTGGACATCAATGGNATTNGGACTTATGAGTATTCAGACTATAACAACTCTGAT…
GmaAffx.75782.1.S1_at	BQ742018	At3g07480	1e-50	Energy			TGCGCGGCCCACTGCGAGGTCAACATNGCNCAGGAGTGGCTCGACAAGCTACCCCCTCGCTCCTACGACGAGGAGTACGTCCTCGTTCGCAATTCCCGAGCAAGGGTCCTCAACAAACACTCCAGGCTCGGATGCCAAGTTCTCCTCGACCNCGACCTCGAAGGTATGGTCGTTGCCCTCCCCGAACCTAGGCCCTGGGACACTTCCTAAGTCCGAACCTAAGCCAAGTGTTTATTTTCTTTTTTTGGCTCAATAATGTGATCCATGAACCTTTGGAAGCATAGCGGAACTCGGTGAACCTTGTATTGGTTTCTTCCTGTTGTTATATTTTGGGTGGTTTTAGACTCTTGTGCCGGTAATTGGCTCGCTATGG
GmaAffx.91674.1.S1_at	CF807399	At5g53560	1e-42	Energy			TGTATTTTTCATGTGTTGTGGCCTCTTGCTCAAGTTA
GmaAffx.91977.1.S1_s_at	CF807702	At4g02580	1e-119	Energy			TTCCATGGGAATTCACCGAGGCCAATCAAGCAAAGGTTAAGGAGATTTTGTCTCACTATCCATCCAACTATAAGCAATCTGCTACAATTCCTCTTTTAGATCTTGCCCAGCAGCAGCATGGAGGTTGGCTACCTGTTTCTGCAATGGATGCGGTAGCTAAGATTGTAGAGGTTCCTCCCATACGGGTGTATGAGGTTGCCACATTTTACTCCATGTTCAATCGAGCTAAGGTTGGGAAGTACCATCTGTTGGTTTGTGGAACAACACCTTGTATGATAAGAGGTTCACGAGGAATTGAAGAAGCCTTATTGAAACACTTGGGAGTGAAGCGCAATGAAGTAACACCAGATGGTTTGTTTTCTGTTGGAGAAATGGAATGCATGGGATGCTGTGTGAATG…
GmaAffx.92088.1.S1_at	CF807813	At1g51650	6e-29	Energy			GATTTTGAACTTATTGTCAAGTGGCTGTGTAACTTGAGTCTGCTTCTAGGTCCTGAAATGAGAAA
GmaAffx.91723.1.S1_at	CF805997	At5g40760	1e-153	Energy			CTTTGAAGCACTCCCACGGATGTGTATCAAGCATTTGGAACAATATAAGAGACTAAGAGTGTTTGGCACGGTTTGTG
GmaAffx.91826.1.S1_s_at	CF808285	At1g65930	2e-70	Energy			GATGACATCTGTATTGGTTTGCCCTGATGGAAAGACTATTGAAGCAGAAGCAGCNCACGGCACAGTTACCCGNCATTTTAGGGTTCATCAGAAGGGAGGNGAAACCAGCACAAATAGCATAGCATCCATCTTTGCCTGGACAAGAGGGCTAGCCCACAGGGCAAAACTGGATGNCAATGCNAAACTCTTGGATTTCACTGAAAANCTAGAGGCAGCTTGCATTGGAGTAGTAGAGGCTGGGAAGATGACCAAGGATTTGGCACTTATTCTTCATGGATCCAANNNGCTTTCAAGGGAGCATTATTTGAACACAGAG
GmaAffx.92910.1.S1_s_at	CF806558	At3g52300	6e-58	Energy			GAAAATGAGCGGAACGGTGAAGAAAGTNANCGATGTAGCATTCAAGGTGGGAAGGAACATCGATTGGGATGGAATGGCGAAGCTTCTNGTCTCCGATGAGGCTCGCAGGGAGTTCTCCAATCTCCGTCGCGCTTTCGACGAGGTTAACTCCCAACTCNAAACCAAGTTNAGCCAGGAACCTGANCCCATNGANTGGGATTACTATAGAAANGGAATTGGCACTCGNTTGGTGGATATGTACAAGGAGCATTATGAGAGCATTGAGNTCCCCAAGTTTGTTGANACAGTAACTCCTCAATANAAGNCTAAATTTGATGCCCTNTTGATTGAGCTTAAAGAAGCAGAGGAGAAATCTCTGAAGGAGTCTGAGCGNTTGGAAAAGGAAATTGNTGAAGTACA…
GmaAffx.93028.1.A1_s_at	CF808753	At3g52990	3e-51	Energy			GCCAGTACTATCTGTTGTGATCCCCCGACTCAAGACAAATCAGCTAAAGTGGAGCTTTAGTGGAGCTTTTGAGGCAAGACAATCACTTATCGTGAGAGGTCTCTTTCCTATGCTTGCAGATCCACGACATCCTGCTGAGTCAACAAGTGCAACAAATGAGTCTATTCTTAAGGTTGCCCTTGATCATGGAAAATCATTGGGAGTTATTAAGTCACATGACCGGGTAGTTGTTTGCCAGAAACTTGGTGATGCATCTGTGGTTAAGATTATTGAGCTTGA
GmaAffx.93056.1.S1_s_at	CF808781	At2g27510	9e-34	Energy			TTGCCGAGCCGGAGCATGCTCTACCTGTGCTGGGAAGATTGTTGCTGGTTCTGTGGACCAGTCTGATGGCTCATTCCTCGATGACAACCAACTGAAGGAAGGCTTTGTGCTTACTTGTGTCTCCTATCCAACTGCAGACTGTGTAATTGAAACTCACAAGGAAGGAGATCTCTATTGAGCAATGCTGGCCTTAAAGTTGGGAATTGGGGAATTTAAGGTAGACTCTGCAACTTGTTTGCTTGTTCTGCTTTAGAGTCAAATTTTCTTTTGGGATTATTAGTGATTTGGTGTAATGATTTTTTGTTTGTGCAAGCAAGCACTGTGATATTAAGACGATAAACACCCGTCGT
GmaAffx.93110.1.S1_x_at	CF808835	At3g15640	2e-25	Energy			ATAAAAGGATAGTCGGATGCCCAGGAGGTGAAGGTGAGGATGAGCATGATGTTGTCTGGTTTTGGCTGGAGAAAGACAAGCCCCATGAATGTCCAGTGTGCGCACAGTATTTTGTTCTTGAAGTGGTAGGACCTGGTGGACCACCCGATGGACATGGTGATGATGATCACCATTGATTGCATCCTTCAATTAAATCTGG
GmaAffx.93486.1.S1_at	CF806564	At3g04120	5e-31	Energy			GTGTACTGCAAAGTTGCTTGTCTAGTTGCGATTTAGTTTCTTGCTCGTGCAAAAAATGAGAGGTCTGAATAAATCGGTTTCTGGAACCAGTGGATTTACCTTGTTAGGAGCATTAGCTCTATTTTGGACTTTGCCTCTTGTGGAGGAGGATGGAGTTTTTGGATTTTTATATATTTGCTAATGTACTTGTCGTTATTGATTGTTATAGTAGATATTTGGCCGTCCTCTATTTTTCCACGTGGTTCTCGTATACTTGTCCATGTTAAGACAGATTCCAGTAATGACGTTTCGGTGGTTTATCGAAACTAATGGTTACAT
GmaAffx.93557.1.S1_s_at	CF808765	At2g36530	1e-128	Energy			TGCCATATTGGCAGTGTCTCTTGCAGTCTGCAAAGCTGGTGCTNGCNGTCCTGAAANTTCCTCTTTACAAGCATATTGCNAATATNGCGGGTAACAAAAAGTTGGTTTTGCCTGTTCCTGCTTTCAATGTCATTAATGGTGGATCACATGCTGGAAACAAACTTGCTATGCAGGAGTTTATGGTTCTTCCNGTGGGAGCTTCCTCTTTCAAGGAAGCCATGAAGATGGGTGTAGAAGTATATCACAATTTGAAGTCTGTGATTAAGAAGAAATATGGTCAAGATGCAGTAAATGTTGGTGACGAAGGTGGCTTTGCCCCTAACATCCAGGAAAACAAGGAAGGTTTGGAATTGCTGAAAACTGCCATTGCCAAAGCTGGTTACACAGGCAAAGTTGTCA…
GmaAffx.93250.1.S1_s_at	CF808975	At3g06650	2e-95	Energy			GCTATGTGCCGACCATGGTCCTTGTGTCTCTGGTGCTCACAATACTATTGTGACAGCAAGGGCAGGGAAAGACCTAGTTTCCAGTCTCGTATCAGGTTTGCTAACAATTGGTCCTCGATTTGGGGGTGCCATCGATGATGCTGCTCGCTACTTCAAGGATGCTCATGACAGGGCACTTACTCCTTATGAGTTTGTTGAAGGTATGAAAAAGAAGGGAATTCGTGTGGCAGGAATAGGGCACAGGATCAAGAATAGGGACAACAAAGATAAGAGAGTTGAGCTGCTACAGAAGTTTGCACGAACACATTTTCCTTCCGTGAAATACATGGAATATGCTGTTCAAGTTGAGACCTACACACTCACAAAGGCAAATAATTTAGTTCTTAACGTAGATGGTGC…
GmaAffx.13837.1.S1_at	BI426968	AtCg00670	7e-90	Energy			AAATTTATGGTTTCGATTGGTGCAAACCCAATAGTCTTNATTTACAATTTAAGATGAGAAGGACTTTCCCATCGGTAACAAAACAAATATAAAGTTACCCGTTAAGCGGAGAAAATACTATTTCAATTAAAGATAAAGTATGTCCTTAATGAATGAATTTTGATGGATTTTGGACGAACGGAATAAGAAGGTCAGCTACCCAGCAAATTTTCATAATTAAATACCGTTACTGTATAACTAGATTTCATTGTGAAAAAATCTACTTACTAAACTAAATATTGGATGGGTAGAGCCAAAGAGTGTGAACTGTACAAGTTAACAATAACATTAATTAAATTAATAAAAAATGAAAAGAAAGAAAGGCTCCGGTGTATAGAAAGGACCTGCCCGTTTCTAAAA…
GmaAffx.1301.38.S1_at	CA802260	At4g30210	0	Energy			AGGGATGTACACCGCGCCCTGCACACAATTTTGCAAGAGCAGGGTTCTCTCGATAGTTCCAAGG
GmaAffx.1301.38.S1_x_at	CA802260	At4g30210	0	Energy			AGGGATGTACACCGCGCCCTGCACACAATTTTGCAAGAGCAGGGTTCTCTCGATAGTTCCAAGGCTGAGAGCATGGTAAAGAATCTACAAACTACTGGCAGATATTTGCGCGATGTATGGTGATGATATCTGAATGCAAGCCGTGGGGGTGACGAAGATATTAATAAAACATAGAGTTGTGGCTAGAGGATTTTGAAAGGGCCTTATTTGTGCCACCTTTCATTAGTGCCCTCAAAATTGAGGGGGGGCGCTTGTTGCCATCACGACGACATTTCCTACGATTCTTT
GmaAffx.34569.1.S1_s_at	AW306183	At5g25450	5e-10	Energy			GAAGCATTGGGAGGTTTGCCCCTATATCAACGATCCATTCCTTGAGTGCATCAAGTATTTCATGAAGGTATTTTGATTGGAGTGGGAGGGTTTAAATTGTATTGATCTTGTGGTAAAATGTTTTCTTATAAGAAAAAAATATGGACAGCTTTGTTGGTATAAACTTATATGGAATGCATTTTTTAATGGTATAAACTTGCCTCGGGCATTTTCTAATAAATGGCAACAACAGACTTTT
Gma.9838.1.S1_at	BF595182	At3g51030	2e-48	Energy			GAGGGACAAGTCATTAGCTGCCACACCGTTGAAGAATGGAACGATCAACTCCAGAAGGGCAACGAATCCAAGAAACTCATTGTTGTGGATTTTACTGCTTCTTGGTGTGGACCATGCCGTTTCATTGCACCATTCTTGGCTGAGCTGGCTAAGAAGTTCACAAGTGTCATATTCCTAAAGGTGGATGTGGACGAATTAAAGAGTGTTTCTCAAGATTGGGCTATTGAGGCTATGCCCACTTTTGTGTTTGTGAAAGAGGGAACGCTTCTGGACAAAGTGGTGGGAGCAAAGAAGGATGAGCTGCAGCAGAAAATACAGAAACATGTGGCTTCAGCTAGTGCTTAATCTAGCTCACCTTCAGAAACTTTATATATGCGCTTTCTTTTCATAATCTTGTAC…
Gma.9944.1.S1_at	CD398368	At2g20260	2e-28	Energy			GAGAAATCATCATGGCATCAGCAGCATCTGGGTTTGTGNTGTCNCTTAATGTTGCAGCTNCCACCACAAACTCAAGGGTGGTCNTGTTCAACACNAAGAACAACNCTTCTAGGNTTNTTGTNAGGGCTTCAGATGAGCCTGCAGCGGCGGCACCCGCCACCGCCACACCCCCAGCTGAAGCTGAAGCNAAACCAAANCCACCACCTATTGGCCCCAAGAGAGGTGCTAAGGTGAAGATTCTTAGGAAGGAATCNTACTGGTACAAAGGCACTGGTTCAGTGGTTGCTGTTGATCAGGACCCCAACACTCGCTACCCTGTTGTGGTTCGATTCAACAAAGTCAACTATGCCAATGTATCAACAAACAACTATGCTTTGGATGAGATNGTGGAAGTGGAAT…
Gma.8119.1.S1_s_at	BU548381	At3g51030	2e-40	Energy			GGCCCCAGTTCTTGCAGAGATTGCAAAGAAAACTCCTGAATTGATCTTCCTCAAAGTGGATGTGGATGAAGTGAGGCCTGTTGCTGAGGAATATTCCATTGAGGCCATGCCAACCTTCCTCTTCTTGAAAGATGGCGAGATCGTGGACAAGGTGGTTGGTGCTAGTAAGGATGACCTTCAAGCCACCATAG
Gma.7343.1.S1_a_at	BU548960	At4g21090	5e-65	Energy			TTGCGTGTTCAACTTGCCATGTTATAGTCATGGACGTAGAACAATACAATAAATTGGAAGATCCAACTGATGAGGAAAATGACATGTTGGATCTAGCTTTTGGGCTTACTGAAACATCACGTCTGGGTTGCCAAGTGATTGCTAAACCCGAACTTGATGGAATTCGTTTAGCTATTCCTGCTGCCACTCGGAACTTCGCTGTTGATGGTTATGTGCCGAAAC
Gma.7097.1.S1_at	BG047373	At4g02620	4e-56	Energy			GACAAATTACCTCATTGTGGATTCAAAAACAACNGTCAAACAAATTGAGGATGCATTCAAAGAATTTACAACAAGGGAGGATGTTGCAATTGTGCTGATTAGCCAATATGTTGCAAATATGATAAGGTTTTTGGTTGATAGNTATAACAAGCCNGTTCCTGCAATACTTGAAATCCCTTCTAAAGANCATCCTTATGATCCNGCACATGATTCNGTTCTGTCACGAGTGAAGTATCTCTTCAATACCGAATCAGTTGCATCTGGGAGACGCTGAATTCACCNTTTNCAGTTGCAGCTTTTTGGGGGTGTTTGTTGTTTTTCTTTGTACANTATGGNTAATAATCTTTTCTTGAAATTCAGAGTTCTATGTAGATGTAGCTTAAATAATTTGTGCTGTCT…
Gma.7397.1.S1_at	BI970483	At2g20360	7e-66	Energy			GATATGTGAAGGTGCCTTTCCCCATTGCAAAGGCATTGGCAACACCAAGAGAAATATTACTAAACAAGGTCCCCTTTCCACTACCTGTTCCTGAGATATTAAATCTGGATAAGATCCAGGCTTTGACTACAGATACCGTTGTTTCAGAAAATGCTTTGACTTTCAATGATCTTGGAATTGTTCCTCACAAGCTGAAGGGATACCCTATTGAGTTTCTTATCTCATATAGGAAAGGAGGCCCACAATTTGGTTCTACTATCAGTGAAAGGGTCACTCCAGATTCTTGGCCGTAAGATTCTTTGGATGTTTGATCCTGAATCATTTTTCTGTCTTGCTTGTACTACCACCATTTAATTT
Gma.7412.1.S1_at	CD412844	At1g75630	3e-58	Energy			ATTGCGGTTATTATCAGCACTGGGATAAACCCAAAGGCTAAGTCTTACTATCTCTTTGATGGATATGCTCATTTGTCCTCTGGCCTTGCCTGTGGCCTAGCTGGCCTCTCTGCTGGAATGGCCATTGGGATTGTTGGTGATGCTGGTGTCAGAGCTAATGCCCAGCAACCGAAGCTGTTTGTTGGCATGATTCTTATCTTGATTTTCGCTGAAGCTCTTGCTCTGTATGGCCTCATTGTGGGTATCATCCTCTCATCTCGGGCAGGCCAATCTCGTGCCGATTAAA
Gma.6556.1.S1_at	CA782240	At3g51030	1e-41	Energy			TGCCCCAATTCTTGCAGAGTTTGCTAAAAAGTTGCCGAATGTCACCTTCCTCAAGGTGGATGTGGATGAATTGGAGACTGTTTCCAAGGAGTGGGGAATTGAGGCTATGCCAACCTTCCTGTTCTTGAAAGAAGGCAAGCTGGTGGACAAGGTTGTGGGTGCCAAGAAAGAGGAGCTGCAATTGACAATAGCCAAACATGCCGCAATTGCTGCTGCTTGAAGTGCCATATGAATATGTTAAGAATAATAGACTATTGTCTTCGAGTCAGTTTGCTTTTATTACTATTAATCTGTTATTGGGTCTGTTTGCATGATTTCAGAACGGATTTAGAGTTAGTAAAACATGGATGGGTTATGTGTAAATGAAATTGTTGCACTATCGTGATTGAAACATTTCTGC
Gma.62.3.S1_x_at	BE658575	At3g14940	4e-15	Energy			TGCAGAACACTGGTTAAGTTTGTTTGAATACTGAAAGTGAGTGCTCTAGTTTTGTTCTCAGATACACTTTTTTTGTTTTGTTATTATGTTGCCCCACCTTTCTGTACAATTTGGTATGCTGCTCTAGAATTCCAGAAGAGCTAGCTACCACACAAATGAATCAATGACATTGATCTGTTATGTTTCTTATGCTTAGTACCGTTACTACACCCTTCTATACTTCTTTGTATC
Gma.6258.1.S1_at	AW349094	At5g25450	4e-36	Energy			CCGAAGAAGAACTGGTTCGCCGCTCAGCACATGAAATCCCT
Gma.6258.1.S1_s_at	AW349094	At5g25450	4e-36	Energy			GACGATTTGTACGATCCTTACTACGATCTNGATGTGAAGGAGGCGCTGAATCGGCTTCCGAAAGAGGTGGTGGACGCTCGCCACGCGCGTCTTAAACGCGCCATCGATCTTTCCATGAAGCACGAGTACCTCCCTGACAATCT
Gma.6160.1.S1_at	CD397751	At3g52730	6e-26	Energy			AGTGGTGAATCGAATCTGCAAAGATGGAAGCTGTTTCTCGAAGAAGAGGTGGAGGCATTTTCGAAAGCCTCTACAAGGTCGTTATGCGTCGCAACTCTGTCTACGTTACCTTCGTCATCGCTGGCGCCTTCCTCGGAGAACGGGCTGTAGATTATGGAGTCCACAAGCTCTGGGAGGCTAATAATGTTGGGAAACGATATGAAGACATTCCTGTGCTAGGGCAAAGGCAGTCAGAATAGTGACCAGCTTGTTAGCCATTTTGAAGTTTTATTATTTTCATGAAAATTTGAAGTGATTAAGAGCTGGAAGCAGTTTCCATTTCTACAATAAATACCATATGCTTGTCTCTTTCAGGCTTAACTCTTATGCGTGGTTTCATTTACTG
Gma.6160.1.S1_s_at	CD397751	At3g52730	6e-26	Energy			GTAACCCTAGAGTGGTGAATCGAATCTGCAAAGATGGAAGCTGTTTCTCGAAGAAGAGGTGGAGGCATTTTCGAAAGCCTCTACAAGGTCGTTATGCGTCGCAACTCTGTCTACGTTACCTTCGTCATCGCTGGCGCCTTCCTCGGAGAACGGGCTGTAGATTATGGAGTCCACAAGCTCTGGGAGGCTAATAATGTTGGGAAACGATATGAAGACATTCCTGTGCTAGGGCAAAGGCAGTCAGAATAGTGACCAGCTTGTTAGCCATTTTGAAGTTTTATTATTTTCATGAAAATTTGAAGTGATTAAGAGCTGGAAGCAGTTTCCATTT
Gma.5672.4.S1_at	CD396011	At1g75630	4e-47	Energy			TATGGCCGGAGTGTTGGGAATCTACGGCTTGATCATCGCCGTCATCATCAGCACCGGNATTAACCCTAANGNCCAAATCCTATTACCTCTTCGACGGCTACGCTCACCTCTCCTCCGGCCTCNCTTGCGGNCNTNGCTGGCCTCTCCGCTGGCATGGCCATTGGCATTGTTGGCGANGCCGGTGTTAGAGCAAATGCCCAACAGCCAAAGCTTTTTGTTGGGATGATTCTCATTCTCATCTTTGCTGAGGCGTTGGCATTGTATGGACTCATTGTTGGCATCATCCTCTCTTCNCGTGCTGGCCAATCCAGAGCTGATTAGTATAAAATTTCCTGTTNNNTGCNGCGCACAGAACCATGAATTGGANGGTGAATGTCGCCGGGGACTAGGTCATGTTAA…
Gma.5706.1.S1_at	BI967978	At4g02580	1e-126	Energy			TTTGTTAAGTGAGCCCAAGCCTCCTCCCTGCCGTGACCTGGATTCCTGCTGAAGTGTNNTATACTTTTTGCCTTCAATAATGTGAGGCTTGCATGTGTTGGAGCTTGCCTTAATTGAAACATTGTCAGATTGTTAGATGCTCAACCAATTTTTGTATCAACCGTCCTGGATGGTTTCCATTTCAAAAATTTGTTCCATAATCGCCATAAATTTCTTGGCATGTTCATTACTTACCAGCGTTATCTATGTTTTTCTGTACTCTGTACATTAATCACCATGAACGAAATTTGAGGTTACNNTGAAATACNATTTAGTTAAGAAGTGAANTGCGTGGCATGCATNANNNANNNNNNNNNNNANNANNNATTTATCAACAATGGTATGGGAGAACAATCATGT…
Gma.5505.1.S1_a_at	BI942102	At1g13440	1e-149	Energy			AAACTTGTTTCCTGGTATGACAACGAATGGGGTTACAGTTCCCGTGTGATTGATTTNATTGNCCACATTGCATCCGTGGCTTAAANANTTGAGNCTGANCTTGGATATCATCGCTANACCGTTCCAAATTTTTATCTTAATCGAGTTTATTTTAGTGTGAATTCGGAATAAACAC
Gma.5505.1.S1_at	BI942102	At1g13440	1e-149	Energy			GATGATGTTGTGTCTACTGATTTTGTTGGTGATAACAGGTCTAGCATATTTGACGCCAAGGCCGGAATTTCTTTGAATGANAACTTTGTAAAACTTGTTTCCTGGTATGACAACGAATGGGGTTACAGTTCCCGTGTGATTGATTTNATTGNCCACATTGCATCCGTGGCTTAAANANTTGAGNCTGANCTTGGATATCATCGCTANACCGTTCCAAATTTTTATCTTAATCGAGTTTATTTTAGTGTGAATTCGGAATAAACACTTTGTGTTGCTGTGAGAGATATCATTGAAAAACAGTGCAATATGTTGAGTTGGTAGACGGCCTTATAGGTTTTTCCTCTCGTAAGGGACGATTGACTATTCTGTTTCGTTATCATAATCATCTAGTA
Gma.5584.6.S1_s_at	BG047114	AtCg00630	6e-17	Energy			TTGTTATTTTGGAATGTACCGGTTGNGATAAAAAGAGTGTTAATAAGGAATCAACGGGTATTTCTAGATATATAACTAAAAAGAATCGACAGAATACGCCTAGTCGATTGGAATTGAGAAAATNTTGTCCNCCGTNGTTGCAAACATACAATTCACGCANAAATAAAGAAATAGATCAAATTGATCGCTTGTGTGTTACCCTTCGAACCAA
Gma.5057.1.S1_a_at	AW310849	At5g13440	1e-103	Energy			GATAGAGTCAAGGACCCAGAATGGCTCATTGT
Gma.5057.1.S1_at	AW310849	At5g13440	1e-103	Energy			TAAAAGTGGTTCTGCATTCAAGTGGGATGAGTTTACAATTTATTNTTTAAAAATTTATTTGGACAATGTTACAATGCTCCTTTTGGACGTCGTTTGCCCTCAAGTTCTTGTCGGGTATGTTTAGCAAGTGATTTATGTAGCTTCGAAATTGTAACTGTTACCCTTCGGCGAGCTTATACCAATAATCGCCTGACGTTTACTTAGCATATTGGTGATGGCTTCAAGAATATTGAAGTGTGCATCATGTATAAACATT
Gma.5057.2.S1_a_at	BE475334	At5g13430	1e-70	Energy			GATAGAGTCAAGGACCCAGAATGGCTCATTGT
Gma.5057.2.S1_s_at	BE475334	At5g13430	1e-70	Energy			TTACAGGTGGTAGGTTTGCTTATGCCTCTTTGGTCCGTCTCCTTGTCCTCAAGTTTGTGCTTAGCATGTCTGCCAGTAAGGATGTTCTTGCTCTGGCTTCACTTGAGGTTGA
Gma.5057.3.A1_at	CA935008	At5g13430	1e-27	Energy			ATGGTTCTGCATACAAGCGGAATGAGTTTACAATTTCTTTTTTTAAAATTTATTTGGATTACAATGCGCCTTTCGGACGTCTTTTACCTTCAAGTTCTTGTTGGGTATGTTTAGCAAGTGGTTTATGTAACTTGGAAATTGTAACTGTTACCCTTTGGCGAGACTTATATCAATAATCGCCTGACTTTTAGTTAGCATATTGTCGACGAGTTCA
Gma.4918.1.S1_at	CA819981	At1g16700	1e-92	Energy			ATGGCAGCCGCAGGACAACTCGGTATGATATTGACATGACCAAGTGCATNTATTGTGGATTTTGTCAAGAGGCATGCCCTGTTGATGCCATTGTCGAAGGACCAAACTTTGAATTTGCTACTGAGACTCATGAGGAGCTTTTATATGACAAGGAGAAGCTGCTTGAAAATGGGGACCGATGGGAGACTGAAATTGCAGAGAACCTGAGATCTGAAAGCCTTTATCGCTGAAATTTTCCATGTGATCCTTGCCTGTTGCTTTTTCCGTCTAATTGGGCAATGATAAATAAAATGACCAGCGCATGATTTTAAAGAACTGTATGCATACACGATTGTTACATCAGTT
Gma.4327.1.S1_at	CD414299	At5g56350	1e-178	Energy			TTGAGTGCAGCTTCTGCTAGAGCTTCTCATGCTGAAACAACNGAAGAAGCAATAGAATTCGCCATGCAACATGCCAAGTCCAAGGGTCTCTGCCACAACGGGGATTCNGTNGTGGCACTNCATCGTGTGGGCACTGCNTCTNTCATCAAGATCTTGACTGTGAAATGATCACCCCNATTACANGGAATTCTTCTGCTGTTTNTGGCAAATTTTTTNGATGGTGCAAAAGAGGTCTCGNTATACCTCTTCATATCTACATTGGATGCAAACTTCAATNAAAAGCATTTATTAGGATCGGTTACCTGTTTTTCACATATCATATATTACTGGTTTTTTTTTTTTTNGTTACATTTGCCTTATCATTGTGGCGAGNAGCCACNTGNTTTCATTTGTTAAGAT…
Gma.4356.1.S1_a_at	BI942101	At5g11770	2e-82	Energy			GTCTCAATGGGAAGTTGTGCTAATGGAGGAGGATACTACCATTACTCTTACTCCGTAGTTCGGGGATGTGACAGGATTGTTCCTGTTGACATATATATTCCAGGCTGTCCTCCAACTGCTGAGGCTTTGCTGTATGGACTCCTCCAGCTGCAGAAAAAGATCAATAGGCGCAAAGACTTCCTCCATTGGTGGACAAAGTGAGGTCGATTCAATCTATTTTCTTGGCATCGAAGCTATTTTATAATAAGCAACTACATGGTAGTTTACCTTGCTAAGAAGCAC
Gma.4359.1.S1_a_at	AI794712	At1g11530	7e-38	Energy			AAATAGACTCTCAAAAATCATGGGAACACCACATCTCTTATGCTACCAATCAAAAGTACCCTATTGTAGTTCATTTCTCTGCTTTCTGGTGTGTCCCTTCTTTAGTTATGAATCCTTTCTTTCAAGAATTGGCCTCCACTTATGAAGATGTTTTGTTTCTGACGTTGGATGTGGATGAGGTTAAGGAAATTGCCTCCAAGATGGAAATCAAAGCCATGCCCACCTTTCTGTTGCTGAGTGGAGGGACTCCTGTGGACAAAATTGTGGGTGCAAATCCTGATGAAATTAGGAAAAGGATTGACCATTTTGTTCACTCAACTCGTTCCTAGAACTTTTGTTCATTGTGCTAGGAAGCATTTCATATATGTTTTATATTCCAAAGTAATATTTATACGGGTT…
Gma.4359.2.S1_at	BI968877	At1g11530	5e-36	Energy			TGCCACCAATAAAAAGTACCCAGTTGTGGTTCATTTCTCTGCTTTCTGGTGTGTGCCTTCTATAGTTATGAATCCTTTCTTTCAAGAATTAGCCTCCACCTATGAAGATGTTTTGTTTCTGACGTTGGATGTGGATGAGGTTAAGGAAATTGCTTCCAAGATGGAAATCAAAGCCATGCCCACCTTTCTGTTACTGAGTGGAGGGACTCCCATGGACAAAATTGTGGGTGCAAATCCTGATGAAATAAGGAAAAGGATTGATCATTTTGTTAACTCANCTCATTCCTACAAATCTGTGTAAACCATGCACATGATGAACAAGGAGTTGGCCAAATCCTAGAACTGTTGTTCATTGTACTAGGAACCATTTCATATATGTTTTATATTCCAAAGTAATAT…
Gma.3774.1.S1_at	BU550698	At1g60420	1e-78	Energy			GTCTTCCGGCATTGGTGTATCATGAAGGGCACCGCCATGATCTGAATTTGGTGTCTGATGGAAACGGTGGAGGGCCCTTTATTTGCTGCGTATGTGATGAGCAAGGGTCTAGTTGGGCCTACCAGTGTCTCCAATGTGGCTATGAAGTGCACCCAAAGTGCGTCAGAACTGTGGAACGTCATGACAATAATGTCTAGGAATTTTTTAATTAAATTCCTGTGGCAATTAATTCTATATCCTGTGTTACCGTCCAAGAGGGGCGATAACTTGACTTGGCTGTATCCTAATCTGCACCAGGGAAGGGACTGGAATGCCCTTTAGATAAATTAGATTACGTATCTTTATGGTGCTTTTCTACTTGTTCAGAATATGTGTGACTGAGAGTCATAAGAAGGAAAG…
Gma.3969.1.S1_s_at	AW349494	At2g02850	5e-38	Energy			AACGACCCACAATGTGGTTGCTGTGGACAGAAGTGGATACAACAGCTGCAAGACACCAGGGGGTGCTAAAGTGTTCAGTTCAGGGAAGGACCAAATCAAACTAGCAAGAGGGCAGAACTACTTCATATGTAACTACCCTGGTCACTGCGAATCTGGGATGAAAGTTGCCATTAATGCGCTGTGATATACTAGTAGTGCTCAATACTTCTTGAAATGAAGTAACTGTTAAGTTAATGGTCAATTAACTAGCATTAGTAAATGTTAGTGTGTGATATTGTATGTAGTCTTTTTTTTATATGAAGCTGTTATATATATTAATTACTATAGTTTGTGAAGCAAGTGGGAGTGAGCTGGCTTGGTAGATCAATTGTTCCTGTATTTGGTATGTGTTGTGTGGTG…
Gma.3969.2.S1_at	CD412522	At2g02850	3e-37	Energy			GTTGCCATTAATGCAGTGTGATGGTGCTTAATACTTCTTGAGTTGAAGTGAAAATTAAGTTAATGGTCAATTAGCTAGCATTAGTAAATGTTAGTGTGTGCTCATGTATGTACTTTTTTTATATGAAGCTGTTATATATATTTATTAATCACTATAGTTTTGTGAAGCAAAGTGGGAGTGAGCTGGCTTGGTAGATCAATTGTTCCTATGTTTGGTATGTGTTGTGTAGTGGGAGTATAAAAATGGTCCATTAGTCACGGGCTCTTCTTATTAGACATTGGATCTACATATTTTGAAGTTATTGAAAGTCTCAGAGCCAATNATCTGTATCTGTGTGTCGGTGTCACAGTGTATGGTTCTATTACTGATTTTGTTTGCTTCAATA
Gma.3856.1.S1_at	BE822875	At3g51390	4e-12	Energy			GTACAAGGAGCACCATATACGGAGTCGAACCATTGCCTACCCCTGAAGAGATAGAGGAAAAATCAAGGCCGTACACATGCTTGGATGCTGTAACTNNNNNNNGTTNTTNNTNNTTTTTGTACAAGTAGAAGTCTTTCCGTCTAGTAGTTTAATCGTGAAAACTCAGAAGTATGTCGATGTACCCTTTTGCTTTAGATGGGTAGGTGTTATCTTTAGGCAATTTGCTTCATGACATCTTCTGTTCTTCATTTTTTCCCTAAATTTTGGAGGTAGAGTTCCAAGTTAGATGTACAGTTGCAGTGCTATTGTGTTGTTTTGTTTTTACTGTTTAGTCTGTAGACCTGGATATCCAGCTATTATCAAACCGACTACTGCCTGGAACGCTAGAGAC
Gma.2987.1.S1_at	CD393690	At1g14450	1e-19	Energy			GGGATCTGGAAGTGGAAAACACACTGGAGAGTTCTTCAGGAGAAGGGATGCATGGAGGAAGCATCCGATGCTCACCAATCAGCTCCGCCACGCCACCCCTGGCCTTGGCATCGCCGTCGTCGCCTTCGGTATCTACCTCGTCGGCGAACAAGTCTACAATAGGCTCTATGCTC
Gma.2987.1.S1_s_at	CD393690	At1g14450	1e-19	Energy			ATAGGCTCTATGCTCCCGATCCTCATTCGATTTCTCACGTGAAAGCCGGGGATCACCACTAAACGTTTGGACGGACGCACTCCATTCCATCATCACTTAATAAGCTTGCTAGCATGTTCTCGCAGCCTTTAATGTTTAAATTTCAGACCGTGTTCGCTTCTTTGGCACTCACTATGTTGTCTTGTATGCCTACATTTTATGCCTTCAA
Gma.2679.1.S1_s_at	BI945807	At2g27510	8e-40	Energy			GGCGGTATATAAAGTGAAGCTGATTGGACCNGACGGTGAAGAGAATGAATTTGAAGCCCCTGATGACACTTACATTCTGGATNCNGCTGAAAATGCTGGAGTGGAGCTACCTTACTCATGCAGAGCTGGNGCNTGCTCTACTTGTGCTGGCCANGTTGTTTCAGGCTCTGTGGATCANGCAGATCAATCCTTTCTTGATGACCATCAAATNNAAAAGGGTTACCTTCTGACATGTGTNTCATACCCGAAATCAGATTGTGTGATTCACACCCACAAGGAGGA
Gma.2731.5.S1_at	BQ299100	At3g10860	2e-26	Energy			GATTTCGCATTGGTTTGCGTTGCGTGGTTGGTTTTGCGGTATCGAAGAAGAAGATGGGGAAACAGGTTGTGCCGGTGAAATCAGTGATCTACGCGCTTTCCCCTTTCCAGCAAAAGATTATGCCGGGTCTCTGGAAGGACTTGCCCACGAAGATTCACCACAAGGTCTCCGAGAATTGGATCAGCGCCACTCTTTTGCTCGGTCCCCTCGTCGGCACCTACGCGTATGTTCAAAACTACCTGGAAAAGGAGAAGCTGGCTCACAGGTACTGAGCTCTTGCAAGAGCTGATTGGAT
Gma.2731.5.S1_s_at	BQ299100	At3g10860	2e-26	Energy			ATGCCGGGTCTCTGGAAGGACTTGCCCACGAAGATTCACCACAAGGTCTCCGAGAATTGGATCAGCGCCACTCTTTTGCTCGGTCCCCTCGTCGGCACCTACGCGTATGTTCAAAACTACCTGGAAAAGGAGAAGCTGGCTCACAGGTACTGAGCTCTTGCAAGAGCTGATTGGATAACCTTCTAGTTTGTTGCCTTGATCTTGTTTAGCCACCCAATAATGTGACACTGTTG
Gma.17344.1.S1_at	CD409198	At2g33040	1e-137	Energy			TTCTTCAGAATCTGGCTGAGTTCCAGTTTTCTTGTGTCATGTACAATGCTGTGTTGGAGAATGCTTGTAGTGAGCAAGGAGCAAGAATGTCTGCAATGGACAGCTCTAGCAGGAATGCTGGGGATATGCTTGATCGTCTCACCCTCACCTATAACAGAACTCGTCAAGCATCAATCACCACTGAATTGATAGAGATTATCTCTGGAGCTTCCGCACTGGAAGGTTAATTACAGGAGAGCAATCTGTGTAATATATTCAACAGTGGCGCGATATTAAGATAATATCGTTGGATTCTTTTGAAATTTGTTGGTGTCATTTTTTTAATCTTACTTGACTTCTGTAATAAGTGTTCCAAGGTCAAACCCATTGT
Gma.17476.2.S1_at	BE058960	At2g36460	1e-178	Energy			GTACTGATCAATCTAAGTGCGGGTAGGAATCGGTATTTTATGGGTACAACCGAATTTTCTTGTTAATGAGTATTGTGCTTCGACTCTTCCCAGAATAATAATCGTTTGGAATTTTGCTTTTTGTTTTTCCTAGTGTTCCTTCATATCAATTTTAGTAATTCGGTGTATTGGTCAAACCTGTGCAAACAGGGGAGGGGATGTAACTTTGTTTTCTTGATAGACACCACCACCTTGCTGTTAACGAGGCTTTGTGTTTATTTTGCA
Gma.17706.1.A1_at	BI943579	AtCg00500	3e-67	Energy			TCTTATTCTGGTATGTGCGTCCGGAGGAGCGCGTATGCAAGAAGGAAGTTTGAGCTTGATCCAAATGGCTAAAATCTCTTCTGCTTTATATGATTATCAAAAAAATAAAAAGTTATTCTATGTATCCATACTTACATCTCCCACTACTGGGGGGGTAACTGCTAGTTTTGGCATGTTGGGGGATATCATTATTGCCGAACCAAATGCTTATATTGCATTTGCTGGTAAAAGAGTAATTGAACAAACATTGAATAAGGCAGTACCTGAAGGTTCACAAGCAGCTGAATATTTATTCCATAAGGGCTTATTTGATTCAATCGTACCGCGTAATCTTTTAAAGGGCGTTCTGAGTGAGTTATTTC
Gma.17682.1.S1_at	BG839162	AtCg00120	0	Energy			CAGACCCGCTATTAATGTAGGTATTTCCGTTTCCAGAGTTGGATCGGCGGCTCAAATTAAAGCCATGAAACAAGTAGCTGGTAAATTAAAATTGGAATTAGCACAATTCGCAGAATTAGAAGCTTTTGCCCAATTCGCTTCTGATCTCGATAAAGCTACTCAAAATCAATTAGCAAGAGGTCAACGATTGCGCGAGTTGCTTAAACAATCCCAATCAGCTCCTCTTACCGTGGAAGAACAGATAATAACTATTTATACTGGAACGAATGGTTATCTTGATTCATTAGAAATTGGACAGGTAAGGAAATTTCTTGTTGAGTTACGTGCTTACTTAAACACGAATAAACCTCAATTCAAAGAAATCATATCTTCTACCAAGACATTCACTGGGGAAGCAGA…
Gma.17597.1.S1_at	AW349391	At2g36530	0	Energy			AACCAAATTGGTTCTGTGACTGAGAGTATTGAAGCTGTCAGGATGTCCAAAAAAGCTGGATGGGGTGTCATGGCNAGTCACAGAAGTGGAGAGACTGAGGATACCTTCATTGCTGACCTTTCTGTTGGTTTGGCNACGGGTCAAATTAAGACTGGAGCTCCATGCAGGTCNGAGCGTCTTGCTAAATATAACCAGCTCTTGAGAATTGAGGAG
Gma.2162.1.S1_at	BI968990	At2g01140	1e-165	Energy			TTTCTTTCTCATATGCACGGGCTCTTCAGAACACNGTGCTNAAGACATGGCAAGGACACCCTGAGAATGTGGAAGCTGCTCAAAAGTCCCTTTTGGTGCGTGCTAAAGCAAACTCCTTGGCTCAACTTGGAAGATACTCTGCTGAGGGTGAGAGTGAAGAGGCCAAGAAGGGAATGTTTGTCAAGGGCTATACCTACTAAAACT
Gma.2011.1.S1_s_at	CD407513	At4g25570	5e-73	Energy			TGGGATTGCCAATCTCTACAGCTTGCATTCATGGCTTGGAATTGGGGTTATTGTCCTTTATGGCATTCAGTGGATATATGGGTTTGTGATCTTTTTCTTCCCTGGTGGGACTCCAGACATTAGACGCGCCTCACTTCCTTGGCACGCGCTATTTGGGCTGTTTGTATTTGTCTTGGCTGTGGGCACTGCTGCTCTTGGGTTTCTGGAGAAGCTCACTTTCCTTGAGAACTCAGGATTGGACAAATATGGTTCTGAGGCTTTGCTTGTCAACTTCACTGCCATTATCACAATCTTATTTGGTGCCTTTGTTGTGTTATCTGCTCTAGCTGA
Gma.17933.1.S1_a_at	CD395441	At5g53560	2e-42	Energy			TTTGTTATCTGCAACAGGGAAAGATGCAACCAATGACTTTGAAGATGTGGGGCACAGTGATTCTGCTAGAGATATGATGGAAAAATACTACATTGGTGAGATTGATGCATCAACCGTCCCACTAAAACGGACCTACATTCCACCTCAGCAAGCTCAGTACAATCCTGATAAGACTCCAGAATTTGTGATCAAGATTTTGCAGTTCCTGGTCCCTCTCCTGATCTTGGGCTTGGCCTTTGTTGTGCGACACTACACCAAGAAAG
Gma.1488.1.S1_s_at	AW394837	At5g08290	1e-79	Energy			ACGACTGGGACGAAACCTGCATGCAGATGGACGAGGTGTTGGCGTCAGTGGCGGAGACGATAAAGAACTTTGCGGTGATATACCTGGTGGACATAACGGAGGTGCCGGATTTCAACACCATGTACGAGCTCTACGACCCTTCCACGGTGATGTTCTTCTTCAGGAACAAGCACATCATGATTGATCTCGGAACCGGTAACAACAACAAGATCAACTGGGCTCTCAAGGACAAGCAGGAGTTCATCGACATTGTTGAGACCGTCTATCGTGGAGCCAGGAAGGGACGGGGTCTCGTCATCGCTCCCAAAGATTACTCCACCAAGTACCGTTACTAGT
Gma.14563.1.S1_s_at	CD399224	At2g02850	7e-37	Energy			TTGCTGCTTCACTCTCAGATGGCTCGTGCTGCCACCTACACAGTTGGAGATTCTGGGGGTTGGACCTTTAACACTGTTGCCTGGCCCAAAGGAAAGCTCTTTCGGGCTGGTGACACACTTGCTTTCAATTATAGCCCTGGGACTCACAATGTGGTGGCCGTGAACAAGGCTGGATATGATAGCTGCAAGACTCCAAGAGGAGCCAAAGTGTATAAGTCAGGGACGGATCAGATCAGACTTGCCAAGGGACAGAACTACTTCATCTGCAATTATGTTGGTCACTGCGAGTCTGGGATGAAAATTGCCATCAACGCTGCCTGAGTTTAATAATATGGTTAACTNCCCATACATATTGTATTGTAATGCAAATTGCACCCTTTAGTGGGAAGTTAGCTCCTT…
Gma.1390.1.S1_at	BE659513	At5g04140	0	Energy			AACTACGGCAGATCAGGTCACTTATCAGTCTGCTTAGGGTAACAATCTAAGGTTACATTACATTGATTACGCCAGGCTATGGAGCCATTGTTGTGTCCCTGATTTGTACAGGAATTGGAGAGGCTATCAATTAGGTGGAAATGCTAGCCAAAATATGGGATTAAACTATCCCTTGAAACCATGGTGCTGCATGTATTCTCAAGATCATTTTTGCCAGCAGTATGAGGAACCCCGTATACATCCATCTGAAGCATTAGCATTCTCTTTTGTATAGCCATGTGAAAGGAAAAAAGCNTGTATATAAAATGCAGTTGATTCGAATTTGATTGGGACTTTTGTGGACGGTCAAAATAAATAGTTGGGGCTTGATATGCCTGGGTCCCCTTTG
Gma.12202.1.S1_at	AW459431	At2g36460	1e-164	Energy			AACGCCATGAACAAGTCCCAGGGAAAGAAGCCGTGGTCCCTTTCTTTCTCTTTTGGAAGGGCACTTCAGCAAAGCACTCTCAAGGCATGGGGTGGGAAAGATGAAAACATTAAGAAGGCTCAGGATGCTTTATTTGCCAGGTGCAATGCAAACTCACATGCAACTTTGGGAACTTACAAAGGTGATGCTACCCTTGCTGAGGGTGCCTCCGAGTCTCTCCATGTCAAGGACTACAAATACTAACTAAAGGTGTTGACTTCTTTTAATTTGGAGAATTTTTGCACTATTGGCTACACCATTCTCATGTTCTTTCCTTCATAGAAGTTAGACTCGGCCGATTTGCTTTCTGCTCTCGGTTATAGGATGTCTACGGATTAAAGAATAATCGCATCAAGCTAA…
Gma.1305.1.S1_at	CD411822	At5g39950	4e-43	Energy			CTACTTCTAGAGTCTCCTCCTTCCACTCGTCGC
Gma.15499.1.S1_at	AW348149	At5g65690	1e-156	Energy			GCATTCATTATGCTACACCCTACAAAGTATGCAGCAAT
Gma.15514.2.S1_x_at	AI965499	At3g52300	1e-65	Energy			TTTCAATTAGCAAACCATCAGAGGTTGATGTTGTTCTTGCTGGTTTAATAATAACAACTACATTGAATTCTTTGTAACTCGGTTCTCTTTTTCAGTTCAAAGGTTCTTATATTACAGTGTTGAAATTNTGTGGTACTGTAGTTAATCACTTGAGACTTATCCACAAAGTGCGGTTGTGGTCGTCGGCGAAACTGCTGATAAGGTTTCCGTCCGGAGACAATTTGAAGAAAATGTTGTTTTGCGTTAGTCTTAATA
Gma.15886.1.S1_x_at	CD405745	At5g39950	3e-47	Energy			GGAGAGTTCTGCTTCTAGGGTCCAGTCTTTCCACTCTTCGGCGCGCTGGCAGCTCCACTTCAACGAGCTCAAAGAAACCAATAAGCTCGTTGTGATAGATTTCTCGGCGTCGTGGTGCGGCCCTTGCAAATTCATAGAGCCAGCGATTCACGCCATGTCCGAAAAGTTCACCGACGTTGACTTCGTCAAGATCGACGTCGACGAATTGCCGGATGTGGCGAAGGAGTTTAATGTGGAGGCGATGCCGACGTTCGTGTTGTGTAAGAAAGGGAAGGAAGTCGACAAGGTTGTGGGCGCAAAGAAGGACGAGCTCGAAAAGAAGATTGAGAAACATCGATCGCAATCTTAGCTCTGTAATCCAATTTATCCAGTTATTTATCTTTCTTTTCAAGAGAAACA…
Gma.16334.2.S1_at	BI973987	At1g80230	2e-45	Energy			ATACACTCTGGCCTTTCAAAATCCTGTGGCCTANGTTTGATTTTGATTTGTCTATACCTTNTTGTGTNNCAACTTTTGAGNTAGAAAGTTTATGCGATTATTTGAACGCAGGATGCTCATTTGCTTGAGCTACC
Gma.1651.1.S1_at	CD395076	At3g17880	6e-75	Energy			CTGAAGCCCAAGTACAAGCAGCATTATCTGCTTTAAAAGATGGGCAAGTCATGGGTATTCACTCTAGTGGTGAATTGGAAAAGAAGTTAAGTGCTGCATCAAAGACATCACGCTTGGCGATCCTGTATTTTACTGCAACATGGTGTGGCCCTTGTCGCTTCATTTCCCCTATTTATACAAGCTTGGCTGAAAAGTACCCAAAAGTGGTTTTTTTGAAAGTTGACATAGATGAGGCCAGGGACGTTGCTGCAGGTTGGAATATTAGCAGTGTTCCGACATTTTTCTTTGTTAAGAATGGCAAAGAGGTTGACAGTGTGGTCGGGGCAGACAAAAGTACACTTGAAAGCAAGATTGCACAACATGCTGGCTCT
Gma.16636.1.S1_s_at	AW705534	At3g15020	2e-52	Energy			TTCGTGCAATCCACTGTTACTGAACTTCCCTNCTTTGCTTCCAAGGTGAGGCTTGGGANGNNTGGNGTGGAGGAAGTTCTGGGCTTNGGNCNNCTCTCAGATTTTGAGCAACAAGGCCTCGAAAGCCTTAAGCCTGAACTCAAATCATCAATTGAGAAGGGAATC
Gma.16750.1.S1_at	BE658232	At5g40760	0	Energy			GATGTCTACGGTTCAAAGTGAGCTTGACTTGTCATATGGACAACGGTATCAAGGAGTAACCATTCCTGAGGCTTATGAACGCCTAATTCTTGACACAATTAGAGGTGATCAGCANCATTTTGTTCGCAGAGATGAGTTGAAGGCATCCTGGCAGATCTTCACCCCACTTNTGCACAGAATTGATGAAGGGGAATTCAAGCCACTCCCCTACAAACCAGGAAGCAGAGGTCCTGCAGAAGCAGATCAGTTACTTGAAAAAGCNGGCTATGTTCAAACACACGGCTACATATGGATCCCTCCTACCTTGTAGAGTNATCTAATGTAATAANATGAGGAATNTTTAGNTGCTAATGAATACACAATAAGCTTGNGAGGCTTCNNNTGGAACCACTCCTCATG…
Gma.16750.2.S1_s_at	BI700016	At5g40760	3e-30	Energy			ACTCCCCTACAAACCAGGAAGCAGAGGTCCTGCAGAAGCAGATCAGTTACTTGAAAAAGCNGGCTATGTTCAAACACACGGCTACATATGGATCCCTCCTACCTTGTAGAGT
Gma.17053.1.S1_s_at	BI945957	At3g04120	4e-23	Energy			GTCTTTTTAAGGTGGTGTACTGCAAAGTTNNNTNNNNNNNNNNNNNNNNNNNNNNNNNNNNNGNNNNANNNNNNNGNTCNGAATAAATCGGTTTCTGGAACCAGTGGATTTACCTTGTTAGGAGCATTAGCTCTATTTTGGACTTTGCCTCTTGTGGAGGAGGAT
Gma.17053.2.S1_s_at	AW348911	At1g13440	1e-160	Energy			GTTACTTCAAAGTAGCTTGTCTTCACATTATTACCGTATGTTTATGTTTAGCTGCGATTTAG
Gma.17053.3.S1_at	CA783832	At3g04120	1e-56	Energy			GTTGGTGATAACAGATCAAGTATTTTTGATGCAAAGGCTGGAATTGCATTGAATAAGAATTTTGTGAAGCTTGTCTCTTGGTATGACAACGAGTGGGGATACAGTTCACGTGTCATTGACCTGCTTGTAATCGTTGCCAAGAAGTCTTTTTAATTAAGGTGGTTCTAACATTATGTGCTGGTCAAGCTGCGATTTAGTGTCTTGCTCGTGCAAAAATTGAGAAGTATGAATAAATCGGTTTCCGGAACCAGTGTTGTTACCCTGTTACGAGCATTAAGCTCTTTTTTGTTGCCTCTTCTGTGTAGGGGATGGAGTTTTTTGGATTCTTATATAC
Gma.17053.3.S1_x_at	CA783832	At3g04120	1e-56	Energy			CTCCACCGACTTTGTTGGTGATAACAGATCAAGTATTTTTGATGCAAAGGCTGGAATTGCATTGAATAAGAATTTTGTGAAGCTTGTCTCTTGGTATGACAACGAGTGGGGATACAGTTCACGTGTCATTGACCTGCTTGTAATCGTTGCCAAGAAGTCTTTTTAATTAAGGTGGTTCTAACATTATGTGCTGGTCAAGCTGCGATTTAGTGTCTTGCTCGTGCAAAAATTGAGAAGTATGAATAAATCGGTTTCCGGAACCAGTGTTGTTACCCTGTTACGAGCATTAAGCTCTTTTTTGTTGCCTCTTCTGTGTAGGGGATGGAGTTTTTTGGATTCTTATATACTTGCAGATGTACTCGGGCTTT
Gma.17053.4.A1_s_at	CD407783	At3g04120	4e-10	Energy			TGTCTAGACATTATGTGCTGGTGTCTACCTGCGATTTAGTGTCTTCTTGCTCGGGCAGAAATGAGAAGTATGAATAAATCGGTTTCGGGAACCGGTGTTGTTACCCTGTTAGGAGCATTAAGCTTTTTTTTGTTGTCTCTTCTGTGTAGGGGATGGAGTTTTTGGATTATTATATACTTGCTGATGTACTCGGCTCTTTGTTGATTCTGATTGCAGACATTTTTGCCCTC
Gma.17053.5.S1_s_at	BM309062	At1g13440	6e-49	Energy			GGCAAGGTCAAGATCGGAATCAACGGATTTGGAAGAATTGGCCGTTTGGTTGCCAGAGTCGCTCTGCAAAGAGACGATGTNGANCTCGTTGCCGTTAACGACCCTTTCATTACCACCGATTACATGACATACATGTTTAAATACGACAGTGTTCACGGACACTGGAAGCATCACGATGTCACCGTTAAGGACGAGAAGACCCTTCTCTTCGGTGACAAGNCAGTCACTGTTTTTGGACACAGNAACCCTGAAGAGATCCCATGGGGGTCAACTGGAGCTGANATCATTGTTGAGTCCACCGGAGTTTTCACCGATAAGGACAAGGC
Gma.10771.2.S1_x_at	BU762116	At4g10040	8e-58	Energy			GACAATCTGGTACAACTCCTGGATATTCCTATTCTACTGCTAACAAAAACATGGCCGTGATTTGGGAGGAAAAGACCCTCTATGATTACTTGCTCAACCCCAAAAAGTATATTCCAGGAACGAAGATGGTATTTCCTGGTCTTAAGAAACCTCAGGAACGTGCAGATCTTATTGCATATCTTAAAGAATCTACTGCTTAATGATTAAATTTTCATACAGTTATGCACTTTGCTTCAAAGTTCTGGAGATTTAGTTTTCAGACATTTAATTCTGTGGTGCAGTAAATACTGTATCAACAAATAAAGTAGACTTGATTGGTTTGCAATGCTATTTTGTTCGTTTTGCATTGCTTCTTAAGAGGCTGCCATATATTGGCTACTGTTCAATTAATTTGGTTGT…
Gma.10919.1.S1_at	AW348585	At5g53560	7e-35	Energy			ATCCTGGAGGAGATGAAGTTTTGGTAACGTCAACAGGGAAGGATGCCACCATTGATTTTGAAGATGTGGGCCACAGTGATTCTGCCATAGAAATGATGGAAAAATACTTCGTCGGGAAGGTTGACACTTCCACTCTTCCAGCGAAAGTTAACCATAGTCTGCCACAACCTACACAAGCAGGTGGCGCTGGCAATCAATCTTCTGGATTTGTTGTAAAGATCTTGCAATTCCTGTTGCCATTCTTGATATTGGGCCTTGCCTTTGCCCTGCAGTACTATGGCAAAAAGAAGCATGCTAGCACCTCATGAAATATGAAGTTGAGCTAGAGCCGAAGTTTCATTAGGTTTGTTAATTCATTGCCTACTTCAATGCAGTATTAAAGNGGTAATAGACTTTAGT…
Gma.10919.1.S1_s_at	AW348585	At5g53560	7e-35	Energy			GTCAACAGGGAAGGATGCCACCATTGATTTTGAAGATGTGGGCCACAGTGATTCTGCCATAGAAATGATGGAAAAATACTTCGTCGGGAAGGTTGACACTTCCACTCTTCCAGCGAAAGTTAACCATAGTCTGCCACAACCTACACAAGCAGGTGGCGCTGGCAATCAATCTTCTGGATTTGTTGTAAAGATCTTGCAATTCCTGTTGCCATTCTTGATATTGGGCCTTGCCTTTGCCCTGCAGTACTATGGCAAAAAGAAGCATGCTAGCACCTCATGAAATATGAAGTTGAGCTAGAGCCGAAGTTTCATTAGGTTTGTTAATTCATTGCCTACTTCAATGCAGTATTAAAGNGGTAATAGACTTTAGTCAATGTTGTGTGTCTGTCATTTAAACTC…
Gma.10702.1.S1_at	BE057108	At5g08530	2e-48	Energy			GCATGGCCAGTGCAGGGTCTTATCAAGCATTTCAGGCCTGAGCTTGAGAGAAGGATTAGAGAACATGCAGAAAGGGAGCTGCTGCAGGCCACTGGTTAGGCTTTCACTAAGGGGTGTGATTGTACTGCTGGATAGCAAGAGTGAGAATAAGACAGTGCCAGTCATTTTGGAAAGATAGGTGGCTCAGGTTACTGTAGCTTTATTGCTACTTCTATTTTCTTTTATGCTGTAGCAATTATGGCTGGATCATACCTGGGAAACCATTTGGGCGAGTTTAAACTGTACCTGCTTGTCATTTGGCACATTTTCATGTAATTTGTTAATAATATCTGTATACTGTTATTAGTTTTGAAACACAATTCATGATTATGCATGTTATCAGTGAATATGATGAGGGAT…
Gma.11089.1.S1_at	AI855657	At5g50850	1e-121	Energy			ACAGTTGAAGAAGGGTTTCCTCAGCATGGCGTTGGCGCTGAAATCTGCACATCTGTCATTGAAGANAGTTTTGGTTATCTTGATGCACCNGTTGAGAGAATTGCNGGGGCTGATGTTCCCATGCCNTATGCAGCAAATCTGGAAAGAATGGCTGTCCCACAGGTTGAAGATATTGTTCGTGCTGCAAAGAGAGCATGCTACAGATCTGTGCCTTTGGCNGCATCTGCTTGAATGNTCTGGAAANTTTTCNTGTCCTGGTTAGTTCTTTGCAGAAACAAANTTTTCCCTANTTTCCGCCANAAAACAGCAGGAAGAAATTGCAACCAAAGAATGNTGATTTTAACTCATTTNTTATGTTAGGCTTTGGTTTAAAAGATTCTGTTGTATGCATAATACTGT…
Gma.11002.1.S1_at	AW350981	At1g15690	0	Energy			GATTGCTATTTCTGCATCCAACACCGGTGGTGCTTGGGATAATGCCAAGAAGTACATTGAGGCTGGTGCTTCTGAGCATGCAAGAAGCCTTGGTCCAAAAGGGTCAGATTGTCACAAGGCAGCTGTTATTGGTGACACCATTGGAGACCCTCTAAAGGATACATCTGGACCTTCACTTAACATCCTTATTAAGCTCATGGCGGTTGAGTCTCTTGTGTTTGCTCCCTTCTTTGCTACACATGGTGGCCTACTCTTCAAGATCTAAAGGATTTGATAGAAAAAGAGTATCGTCCATCATTTTTCTACAACGACAGAACAAGGAAAAGCCGTCCCTTTACCAATGCCTTCTCGTTTTTGTGTTAGTCTTTAACTCATCTGTCATGTCAATTCCATTGTTTT…
Gma.11271.1.S1_s_at	CD416236	At1g51650	2e-30	Energy			AACATATGCGCGAATCTGGTCAGGAATTGCCTCAAGGAACCCTACAAGGCTGAAGCCATCTCTCGTGAGAAGGTCCATTTTGCTCTCTCCAAATGGGTCGACGCCAAGCCTGAAAAACCTACTATTCGTTCAGACACCCCAGAGCAGTGATCCGGAATAGTTGGAAGCTATAAATGCATAAATCTTTGAGATCTGGAAGTTCATTGTCATTTTGAACCTTTCTGTGATGTTTAATTCC
Gma.11258.1.S1_at	CD403347	At5g47030	8e-66	Energy			CTAGCTCAAGGATGTTGGGCAAGACCTTGAAATTAGAA
Gma.11220.2.S1_a_at	CF920389	At4g29010	1e-121	Energy			GAAGACTTTGCAATATTATGCCCAATGGAAAGCCTATATCTGTTACTGACCAAGAGATCGTGGAGATGATACTCTTCCCAGTAGTTAATGAGGCATGCCGTGTTCTAGAAGATGGAGTTGTTATTCGAGCATCAGACCTTGACATTGCATCTGTTCTTGGAATGAGCTTCCCAAATTACCGGGGTGGCATTGTTTTCTGGGCAGACTTGGTTGGGGCCAATCATATATATACCAGCCTAAAAAAATGGGCACAATTATATGGTAACTTCTATAAACCCTCAAGGTATTTGGAAGAAAGAGCACTCAAAGGCATTCCCTTGAGTGCACCTGCTTCATCTACTCCAAAGTCAATGGCACGTCTATGAGAAAGCCAAGTGTTGAGCATATATGTTGGATGTT…
Gma.11925.1.S1_at	CF922804	At1g11530	1e-39	Energy			GTGGCTATGACTCCTGTTTTTGAAGAACTGGCTTCAAGCTATCCGGAAGTTCTGTTTCTCACTGTTGATGTTGATGAAGTCAAGGAGGTAGCCACCAAAATGGATGTAAAGGCAATGCCAACATTTTTGCTGCTGAAGGACGGTGCTGCGGTGGACAAGGTGGTTGGTGCCAATCCAGAAGAGATAAAGAAAAGGATAGATGGGGTTGCTGAGTCCACTCGTGTCTCACTGGCATAGTTAAGCATCTGTATGATATTCTACTGTTGCAAGTTGCAAGATATGTGCTTGTGGTCCTGCACTGCACTATGGCATCTGAGTCAAAGCTTTTTGTGATGTTGTATGTTGTTGAATATCAGTTCAAGTGTAATTTCCAAATTTGATAAGCGCAATGCTTTGGTT…
Gma.11932.1.S1_at	BI095057	AtCg01050	3e-61	Energy			TCTATATTTTCTCCCTGGTTAATACTATTAGGTTCAATTCAAATAATCTATGCAGCTTNAACATCTCTTGGTCAACGCAATTTAAAAAAAANGAATAGCTTATTCTTCAGTATCTCATATGGGTTTCTTACTTTTAGGAATTGGTTCTATAAGCGATACAGGTCTCAACGGGGCTATTTTACAAATAATATCTCACGGATTTATTGGCGCTGCGCTTTTTTTCTTGGCGGGAACGAGTTATGATAGACTACGTCTTCTTTATCTCGACGAAATGGGTGGAATGGCTATCCCAATGCCAAAAATATTCACGGTTTTCACTATCTTATCGATGGCTTCTCTTGCATTGCCGGGCATGAGCGGTTTTGTT
Gma.11940.2.S1_at	BE440563	AtCg00480	1e-144	Energy			GACTTTAAATCTTTGTGTACTGACCCCCAATCGAATTGTTTGGGATTCGGAAGTGAAGGAAATCATTTTATCTACTAATAGCGGACAAATTGGAGTATTACCAAATCATGCGCCTATTGCCACAGCCGTAGATATAGGTATTTTGAGAATACGTCTTCTTAAAGACCAATGGTTAACGATGGCTCTGATGGGCGGTTTTGCTAGAATAAACAATAATGAGATCACTGTTTTAGTAAATGATGCGGAAAAGGGTAGTGACATTGATCCACAAGAAGCACAGCAAACTCTTGAAATAGCAGAAGCTAATTTGAATAAGGCGGAAGGCAAGAGACAAACAATTGAGGCAAATCTAGCTCTTAGACGAGCTAGGACACGAGTAGAGGCTATCAATGTGATTTC…
Gma.1201.3.S1_at	AW733664	At3g06650	1e-167	Energy			ACGCTCCATTGGTCTGATTGGGCACACCTTTGACCAAAAGCGATTGAAGCAACCACTTTACCGTCACCCATGGGAGGATGTTCTCTACACAAAGTGAGNAAGTTTTGTGCGACTGTAAGAACTTTGNCATGCTTCAAATTAGCAATCTTTTGGGAAATCATGCACATCTGAAATATGCTGGAGTGGTTTTGTAGCTGTTAGACTAGTGTTGTACGATCTATTGGTGAAAAGTCATCTTCCATTTGTAACTTGTAT
Gma.11398.2.A1_s_at	CD413467	At2g47170	1e-27	Intracellular Traffic			TAATGCCTTTGGGAGTCTTGCGGATTGGTAATTCTGGATGCAGGGGTGAACATTATCTAGCTTTTATTTCTTGGTCCTCTTCCAAGACAACTCGAATTTGTGCTCATGTAATGCGGTTTAGGACATCTCGAATTTGTGCTCATGTAATGCGGTTTAGGACATCTCGGTGCTAAATTGTAGTAGGATTTTACTTCTTGGGATGCGTAATACTCTGATCTTTCTATTGGGTTTGGATGCAATGTCCATAACTGTAATGGAGATACTAATTCAATGCGCCACCGGGTTCTGTCTGATTTATAGTTTTA
Gma.11282.1.S1_at	AI443415	At5g59840	4e-90	Intracellular Traffic			GATTCTAAGGCTGAACCTCAGACTATCAAGATTAACCAACCCGACCAGNCAGCNACNGGGGGTCTNGCNGCTCAAAAATCGGCTTGCTGTGGTTCATGAAANAAATAACANNTCAGAATCTGCAGTTAGAGGGTGCAGATTCAACACTNGCCCTCATATGGGTGCTATAGTTATTTTGATGACATTTAAAAGTGGGAGCATGTATTTGTCCTTGTATTTCCCAACTGCAAAGANTATGTTTTGAAGATAGTGNTTTAAATTTTTNGNTTACTTAGNTGTCGGATTTGTTGTGATTANTTCGTTTGCTCCANTCTCTCCTCTTTCATTTGTACNCCGACTCTTGAAAGAAAATCTTTCGATTGGATTCAGATTGATTA
Gma.11292.1.S1_s_at	CD409565	At5g47200	1e-100	Intracellular Traffic			GAATGAAATTGACCGTTATGCAAGTGAAAATGTTAACAAGCTTCTAGTTGGAAACAAGTGNGATCTNACGGCAAATAAAGTTGTGTCCTNTGAGACAGCAAAGGCNTTTGCNGATGAAATTGGAATTCCNTTCATGGAAACTAGTGCTAAAAATGCCACCAATGTTGAACAGGCTTTCATGGCCATGGCTGCTGAAATTAAAAACAGAATGGCAAGCCANCCAGTGAACAATGCNAGGCCTCCAACAGTTCAAATTCGAGGACAGCCAGTGAACCAGAAGGCTGGTTGCTGCTCGACTTAGANAGAGACGAAGTATTTGNGGTCTNAGANGTTNNCATGTGTCTCAGTGGCATCTAAAACTAGCTTTTCACATTGCTTTCATATCAAGAT
Gma.11202.1.S1_s_at	AW309575	At1g27970	1e-57	Intracellular Traffic			CAACAGGAACGGCTTAGCGAATCTCTACCAGGAGGGTTCCATGCTCACTTTCGAAGGGCAGAAGATCCAAGGCGCTTCCAACATCGTTGCCAAGCTCACCTCCCTCCCTTTTCAGCAGTGCCACCACTCAATCTCCACCGTCGACTGCCAGCCCTCCGGCGTCAACGCCGGCATGCTCGTCTTCGTCAGCGGAAACCTTCAGCTCGCCGGCGAACAGCACACTCTCAAGTTCAGCCAGATGTTCCATTTGATACCAACACCTCAGGGAAGCTATTATGTGTTGAATGACATATTCCGTTTAAACTATGCATGAAGATGTCATATGACCGGAAAGGCCAT
Gma.1035.1.S1_s_at	CD418467	At1g30630	1e-132	Intracellular Traffic			CCAATCTAGTTGTATGCTGTCTTCATCTCGGCAAACCATCTAACAAATCATTCAGCCAGCTGAAACTTTCTCACCCAGAGCATGTATTGGTCAAACGGGTATCATCAGCTGAAGAAAGTTTTGATAGAGCGCTACAATCATTTTCCTCATGAGTGTCGATGATTGAATTTCTTTCAAGAGTTGAATGGTGTGAGGTCTTCCCGTGCAATTTTTACACCTTATCGTGGCTATTGTATTGGTTGCGTATCTTAGAACATAATCAACTGGGTAATGTGTCATAG
Gma.1045.1.S1_at	CD390651	At3g25040	1e-102	Intracellular Traffic			CAACTAGTACTTTTACAGAGAACTAGAAATATTGACAATTTGACTGGACANTATGTCTTTCTNCTNGGTGCATACAGAGNACTATACATTCTCAACTGGATCTANCGCTACTTTACNGAGCCNCACTTTGTCCATTGGATAACATGGATTTCNGGCCTTGTTCAAACACTACTCTATGCTGATTTCTTCTATTACTATTTCCAAAGCTGGAAGAACAACAAAAAGCTTCATTTGCCAGCATGAGTNTATTCTTCTGTTCTTNAAAACAAGGGTCTANGTGGACAATTAACAGTNAGCAGAGAGGATNCACAAATTTGTCTGGACATAGTGGTTTCTGATTTACAATTGCCTATTTGTTCGTTCTTGCCANCTCAAATACTACTGTACTAATNACTAGGA…
Gma.10871.1.S1_at	CD403269	At5g20720	6e-98	Intracellular Traffic			CACAAGTTGTGTATTCGAAGTATGCAGGTACTGAGGTGGANTTCNATGGTACAAAGCATCTTATTGTGAAGGATGATGACATTGTTGGTATCCTNGAAACTGATGACATCAAGGATCTTAAACCCTTGAATGATAGAGTCCTCATAAAGGTTGCTGAAGCTGAGGAAAAAACCTCTGGCGGTTTGTTGCTTACAGAGGCAACCAAGGACAAACCTTCGATTGGAACAGTGATAGCNGTTGGGCCGGGGCATCTGGACGAGGAAGGCAACAGAAAACCNTTGTCCGTGACTCCNGGGAACACAGTTTTGTACTCCAAATATGCTGGAAATGACTTCAAGGGCAAAGATGGTTCTGACTATATTACCTTGAGAGTCTCAGATGTCATGGCTGTTCTCTCCTA
Gma.1659.1.S1_at	AW132168	At3g07100	1e-54	Intracellular Traffic			AAACCTTGTTGAGGACCAGATGGGTGGTAACAGTGGGTATGCTGAATGGATGCTGCAGATATCNCGACAAGTGCAGCAATCATAATATATAGCTTCCCTGGCTAAATAAGCAAGTCAGNTCTGCTATTTGTCTCACAAGTGACGACCATTTCTTTCTGCATTGGAGNTATATTAAATCTGTCCTTTGGGGNTGCTTGGAGAAGCATTCTTGACCTGGCTAATTGATCGTGACNTGTGAGAAGCATGCTTTTGAGAGATTGTTGATTCATCCTGGGAT
Gma.1630.1.S1_x_at	BF596536	At3g62290	1e-99	Intracellular Traffic			GTGGCCAAGATAAGATCCGTCCTTTATGGAGACACTACTTCCAAAACACTCAGGGGCTTATCTTTGTTGTGGATAGCAATGATCGTGACCGTGTAGTTGAGGCTAGAGATGAGCTCCACCGGATGTTGAATGAGGATGAGTTGAGAGATGCTGTTCTCCTGGTATTTGCCAACAAACAAGATCTTCCAAATGCTATGAATGCTGCAGAAATCACAGACAAGCTTGGTCTTCATTCTCTACGCCAACGCCACTGGTATATCCAGAGCACATGTGCCACCTCTGGGGAAGGACTATATGAAGGGCTGGACTGGCTCTCCAACAATATAGCTAACAAGGCTTAAGGGACATTTTGTGGAATGCCGCTATCTTCTTGCTTGGCTTTACGATT
Gma.1630.2.S1_a_at	BI424237	At5g14670	5e-60	Intracellular Traffic			GCTGGGAGAAATTGTCACAACCATTCCCACAATTGGATTCAATGTGGAGACTGTGGAATATAAGAATATTAGCTTTACTGTATGGGATGTGGGTGGCCAAGATAAGATCCGTCCTTTATGGAGACACTACTTCCAAAACACTCAGGGGCTTATCTTTGTTGTGGATAGCAATGATCGTGACCGTGTAGTTGAGGCTAGAGAT
Gma.1321.1.S1_at	AF198627.1	At3g56240	2e-30	Intracellular Traffic	Ionic Homeostasis		TGAAGTTCTGCAAGCCGTTTCCAAATCTGGGAAGAAGACTGCATTCTGGGTGGATGAAGCACCACAATCTAAAAACAAGCCTTTAGAAAGTGCACCTGTTGCCTCAGAAAACAAGCCTTCAGAAGCTGCAACTGTTGCCTCAGCTGAGCCTGAAAACAAGCCTTCAGAAGCTGCAATTGTTGATTCAGCTGAGCCTGAAAACAAGCCTTCAGATACTGTTGTTGAAACTGTTGCTTAAGGCATTTGTGGTTCTATTTTTCTATGTGGAAGTAGGTCTGTTTCATATAGTATTTCATGTGCTTTGTGCATGTCAGCTATTATATTTGGTGTGTTGTTACTGGTATCTAAGCTACAATAACTTGTGGCCTATTTTTCACATGAGATACATTTCATGGGTGC…
Gma.1324.1.S1_at	BE658235	At2g17800	1e-96	Intracellular Traffic			TGGCACAAAGCTTGACCTTCGGGATGATAAGCAGTTCTGCATNGACCATCCTGGTGCCGTACCTATTACCACAGCTCANGGAGAAGAGCTTAGGAAGCTGATTAATGCNCCAGCTTACATTGAATGCAGTTCAAAAACACAGGAGAACGTGAAGGCAGTCTTTGATGCAGCCATAAGAGTTGTCCTTCAACCACCTAAGCAGAAGAAAAAGAAGGGTAAAGCACAAAAGGCNTGNTCGATATTGTGATTCACTAGGTGTTAACATTTGACTGCCCTTTGTTCTNCCTGTATTACCCTCCCCTTCTTTNTTTTTATCATTTCNTTGNTATTGAAGAAGTTGNAGTNNTNTGTGGGTGTTCCTCAGACAAATACTCTAGATCTCCTTGAAGCAT
Gma.14354.1.S1_x_at	AW755388	At5g59840	4e-92	Intracellular Traffic			TGTACCTACCTCCAAAGGGCAAGCACTTGCTGATGAGTATGGTATCAAGTTCTTTGAAACTAGTGCAAAAACCAACATGAANGTGGAAGAGGTNTTCTTTTCAATAGCAAGAGATATNAAGCAAAGGCTTGCAGACACAGATTCAAGAGCTGAGCCTCAGACTATCAAGATTAACCAACCNGACCAGGCANCCAGTGGTGGTCAACCTGCNCAAAAGTCGGCTTGCTGNGGTTCATGAAAAGAATCAGTATCTGTAGNAAGAGGTGCANNGGTTTCTGCAATAGCACTCNTCTGGGTGCTAATGTTATTCTGATGACATTANAANGTGGGAGCATGTATTTGTCCCTCTGTATCTCCCAACTGCAGATGTCNTNTTTTAAAGTTAATATTTTAAATTCT…
Gma.14966.2.S1_at	BM886910	At1g01620	1e-144	Intracellular Traffic			TCACGTCCCGATTTTGGCTCCTCTTCCAATCGGGTTTGCTGTGTTTTTGGTCCACTTGGCAACCATTCCAATCACAGGAACTGGCATTAACCCAGCTAGGAGTCTTGGTGCTGCTATAATATACAACAGAGACCATGCTTGGGATGACCATTGGATTTTCTGGGTTGGACCTTTCATTGGAGCTGCCCTTGCAGCTTTATATCACCAGATAGTGATCCGAGCAATTCCATTCAAGACAAGGGGTTAATCAATACTTCATCCATCTGTGTTTGAATTATCTTCAATCATGTGTCTATTTGCACAATTTATATGG
Gma.15220.1.S1_s_at	CD398333	At4g05000	1e-92	Intracellular Traffic			GGAATTAATGGTGGCATGGCTTTGAGGGAAGGNNNNTGATGCATCTGGCAGGAAAGGAAAGGGAAAGGGNGTTTACCNAGTTTGTAGACAAATACGGTGCTAATGTCGATGGTTACAGTCCTATNTACGACACCAAGGACTGGTCTCCAACCGGTGATGTCTACGCTGGCGGTACGACTGGCTTGGCTATCTGGGCT
Gma.2787.1.S1_s_at	BG510112	At1g10290	1e-112	Intracellular Traffic			ACACGCCAATTGAGTATTCATGACACCCGAGCAGCAGCTGCCTCTGGCTGGTCAAATGGTAGTGCAGAGAGTAGCCCAAGAAGCAGCAGCGGACCTGGTGATGACTGGAGATCTGCCTTTGATGCAGCTGCCAATGGCCCTGTTAGTCGAAGTGGTTCATCAAGATCGGGATCCAATGGTCACAGTCGACATTCTAG
Gma.2443.1.S1_at	BQ081268	At1g27970	7e-55	Intracellular Traffic			CTCGCCAATCTCTACCAGGAAGGTTCCATGCTCTCTTTCGAGGGTCAGAAGATCCAGGGCTCCCACAACATCGTCGCCAAACTCACCTCCCTTCCCTTCCAACAGTGCCAGCACTCCATCACCACCGTCGATTCTCAGCCCTCAGGCGTCAACGCCGCCATGCTCGTCTTCGTCAGCGGCAACCTCCAGCTCGCCGGCGAACAACACGCCCTCAAGTTCAGCCAAATGTTCCATTTGATACCAACACCACAGGGAAGCTATTATGTGTTGAATGACATATTCCGGTTGAACTATGCGTGAAAGATAGACCTCTGAGTATGTTGACATTTGCCTACAGCTGTTTTGCTTCAGACATTTGCATTTGAGAATTAACGAGTTCATTTTGGTTCGTGTTGAACG…
Gma.3977.1.S1_s_at	BG238427	At3g56190	3e-97	Intracellular Traffic			ATTGTACTACTATGTGTGTCTGTCCAGTTGTTCGTCTTACACATCCACTTACAGAGTGTACCTGCTTTGGTTTTAATTGA
Gma.3568.1.S1_x_at	BI941735	At2g44610	1e-102	Intracellular Traffic			AACTAGTGCTAAGGCTGGGTTTAATATAAAGGCCCTATTTCGAAAAATTGCTGCAGCACTACCTGGAATGGAAACACTATCTTCTGCAAAACAAGAAGACATGGTTGATGTAAACTTAAAGTCTACAAATGGCAGTGCTCAGTCTCAACCTCAGTCAAGTGGATGTGCTTGTTAAGTATACTTTATCATGTGCGGTCCACCTTTTTGTGTCATGCTTTTTGTTTTATGCGGGTTTTTCTATAGTCTTCTACAGCATTATATGAAAAGATGAAAGAATATATAAGCGGATCAGGGTAGGGGTTGATAAAAGTTCTGTCTAGACAATTTCTGTTGTTAGTTGGTTTTTTGCCTATAATGTGTACTAATGAATTTTTTTTTTTTNNNGAACGGCATAATGTA…
Gma.3568.2.S1_a_at	BM308236	At2g44610	9e-71	Intracellular Traffic			GAAAAGACAAGTCTCTATAGAGGAAGGAGAAGCAAAAGCACGTGAGCTCAATGTCATGTTTATTGAAACTAGTGCTAAGGCTGGGTTTAATATAAAGGCCCTATTTCGAAAAATTGCTGCAGCATTACCTGGAATGGAAACACTATCTTCTGCAAAACAAGAAGACATGGTTGATGTAAACTTAAAGTCTACAACTGGCAGTGCGCAGTCTCAACCTCAGCCAAGTGGATGTGCTTGTTAANTATACTTTATCATGTGCGGTCCACCTTTTTGTGTCAT
Gma.3568.2.S1_at	BM308236	At2g44610	9e-71	Intracellular Traffic			GTGTCATTCCTTTTGTTTTATGCAGATTTTTCTAGTCTTCTACATCATTATATGAAAAGATGAAAGAATATATAAGCGATCGGGGTAGGGGTTGATACAAGTTGTGTCTAGAAAATTTCTGTTGTTAGTTGGTTTTGCCCGTGATACTGTGTACTAAAGTAGTAAAGCTGCCCAACCAAAGATTGAATTATGTTCATTGTAACCCTGTA
Gma.4790.1.S1_at	BM270023	At2g45140	6e-80	Intracellular Traffic			TACGTAGTTCTTGTTGGCATCATTGGACTCATCTTGGGTTTCCTNTTGAAGAGGACGTGACCTGAGTGATGGCCAAGTTCTCNNCAAAANGNGATCAATTGTAGAAAGCAACAAGAANTATGTGCGATGATGTGNAAAAACCAANTTGTTGTCTTATTGTCGTGTATTGCTCCTACAAATTTGGAATGTGTGGTCAAAAAATAGGTACTTNTATCAGCCATAGCAATCATAGACANGTGGACAAATTTGTATCATGGGAAGTGTATTGTTATCTGNTNTGGTACATGTGATCAATTCTTTAGTAGTTCCTA
Gma.4707.2.S1_at	CA783500	At3g62290	1e-100	Intracellular Traffic			TCTTCATTCTCTTCGTCAGCGTCACTGGTATATCCAGAGCACATGTGCCACATCTGGTGAAGGGCTTTATGAAGGGCTTGACTGGCTCTCAAACAACATTGCAAACAAGGCATAGTGATTATCGGTCATGGGTTGCATCAAAGTTCATTTGAGTTTAGCGGTTGTGACTTCCAATGTTTGATGTGCTTACCCTGTTTAGAATCTTATTTTCTCTAGCATGTATTATTTGTCTTCGATAAAGAACAGATTGTCTACTACCTAATATCAAAATAATTTGCATTTTTTCTCCGTGTANAACCAAAAGGCATTTGTCTTACCCATCGATTTGTGA
Gma.4528.1.S1_s_at	CA802816	At5g19820	2e-76	Intracellular Traffic			CCGCAGCAACAACTTGCATTGCAATCTATCCTTTCTACATAGTTGTCATTGCTTTGCTGCATATCCATCATTTCTTCATAGCATCTGGCTTGGCAGTTGGTGTCTTGCTCTTTTTGGGAACAAGCTTTTTCCAGTTTGGTGGTCTCTATATTTGTACCCATTCTTTTTNCCATANGNTGGTTTCCATCATTCATTCTTGCATGGTGTTCTATANNNNNNNNNNNTCAGTTTTGAGANTGCAGAGTCAATTGTGATTGGAAAGGGAACTTTCTNTAGAATGTGTATATTATGAGTGTTAATAGTGCGATTGAGTCCAAAAGAGGAGGTTAGGGAATTGTGGCGTGGGAGCTTCTCGTTNTATTCCTCNATTGTTTTTTCTTACCATATTGCGTGAG
Gma.5383.1.S1_a_at	CD392823	At3g13772	1e-109	Intracellular Traffic			GATCCTATTAATCACCTGTGCCGAGATTACCATTGTGCTTTGCTACTTCCAATTGTGCAGTGAGGATTACAATTGGTGGTGGAGATCTTATCTCACTGCTGGGTCCTCTGCGTTGTACCTCTTCCTCTACTCAATTTTCTACTTCTTTACCAAGTTGGAGATTTCAAAGCTGGTATCGGGCATCCTTTACTTCGGGTACATGATAATTGTTTCATATGCCTTCTTTGTGTTGACGGGAACTATTGGCTTCTATGCTTGCTTCTGGTTTGTTCGCAAGATCTACTCGTCGGTGAAGATTGACTGATTTCAGGCA
Gma.6207.1.S1_s_at	CF922738	At5g45130	2e-89	Intracellular Traffic			GAGAGGTACCATAGCTTGGCTCCCATGTATTACAGAGGNGCTGCTGCTGCTATCATTGTCTATGACATCACTAGCTCGGACTCCTTTACCCGAGCTAAGAAGTGGGTCCAAGAGCTTCAAAAGCAAGGGAATCCTAATATGGTCATGGCTCTTGCTGGTAACAAAGCTGATTTGGAAGATAAGAGGAAAGTGACAGCTGAAGAAGCACGTGTATATGCTGAAGAAAATGGTTTGTTTTTCATGGAGACCTCTGCCAAA
Gma.6298.1.S1_s_at	BM309168	At3g62290	1e-100	Intracellular Traffic			TTGATGCTTTTTGGGAGTCTTCTTGTGGATTGGTGATTCTGGAT
Gma.6298.2.S1_s_at	BU080611	At3g62290	1e-100	Intracellular Traffic			GCTTTTTGGGTGTCTTGTGGATGCAGGGGTGAATATTATCTGGTTTTNTTTTTTGGTTCTCTTCTGAGACACATTGGCTTTATGTTCATGTTTTCTGGTTTAGGACATCTTGATGGCTAAAATTATAGCAGGAATTTGTTTCATGGGATGTCTAATACTTTTGAGTTTTTTTATTGGGCTTGGATT
Gma.6613.2.S1_at	BG789774	At5g65020	1e-121	Intracellular Traffic			ACAACAATGAGTTCGGGAATGCCATAAACAAGGATCTGAAAACNGATCCAAAAGATGAATATCTGCAATTATTGAGGGCAGCCATTAAGTGCTTGACTTACCCTGAGAAATATTTTGCNAAAGTCTTGAGGNTGGCTATAAACAAGCTNGGAACTGATGAAGGGGCCCTTACTAGAGTGGTGACNACCAGAGCTGAGGTTGATTTGCAGCGAATTGCTGAGGAATACCAAAGAAGAAANAGCATTCCTCTGGACCGCGCAATAGCCANTGACACTTCTGGAGACTATCAGAGCATTCTCCTTGCACTGGTTGGACATGAGGATTAAGTNTTCTTTCTTANNCTNTTCAGTTGTCATGGGATTGNTNNTTAGGCTATTTGCTTTTCCTCTTATCATGAAT…
Gma.6653.1.S1_at	U32185.1	At4g17170	1e-100	Intracellular Traffic			GGATATGGTGGAATTCCTGGACCTTCTGGAGGTAGGGATGGCCCTTCTGCTTCGGCTGGAGGNTGCTGCAGTTGAAGAGAACCTATCNNAACCTATCTGCNTCAATGTAGTCCTTTATGTCTTCTCTTCTTTTATTTTGGGTTTGGATATG
Gma.7352.1.S1_at	BI701939	At4g04910	1e-141	Intracellular Traffic			TTGCTTGTTACTGTTCAGTTGCAGAGTTTGTGTGTTGCTTGGTTGTGCTGATAGTAATTTTTAGAGGAGACGGGTTTCATAGTTTCTTGTTTTTATCTTTAGGGTTATTACTTAGTTGGAATTGTGCTGCTCTCAAACTGTAATGACCTTTATTGGGGATTCATCATTATCCAAACGTCTTATATTGAGGT
Gma.733.1.S1_at	BM178504	At2g45140	3e-60	Intracellular Traffic			AAGAGGGAAGGCAACAAAAGTCGTGGTGGAGTCTCATTTGTCATTGTCGTATTAATTGGCTTGCTTGGCATAATTATGGGGTATCTCATGAAGANNACCTAAGCATTTCTGCGATTCAATCTTTCACCATAGTTTTCGATCTTAGTTTCTTTGTTCCTNACNATTCAAGCAATNATGAGGAAAGTTAAAATAGATCAATTCAGCAGATGTTGGTTTTTCTTTTTNATTTTTGCNNTTTCTTTTCTTTTCTTTGGGTGGATAACATTTTGGANGTAGAAAACATTAGGGGAAGTTGTGGGTCTGNTGGTTAANCATATTGTGAACTGACTCATNCTTTCGTNAACNTGCATTCTTTTTGTAACTTAANGAGGGGAAGCTTCTTGTTTNCTTCTTTTTGTG…
Gma.7064.1.S1_a_at	BQ613120	At3g62560	4e-54	Intracellular Traffic			GCTCAGGTGGATGCTGTAGTGTACCTGGTTGATGCATTTGACAAGGAAAGGTTTTCAGTGGCTCTCTCAGTACATTAAATAGAGAACAAGTGTTTGCTCTTTATTATCCTCATGCTAATGTAGTCTCCACATTAGCGTATCTCTGCTCATGTAAATTGGATATACTTTAATGGTGGTTTTACTTTTTCTTTGTTATGAATGAGACATACTAGTTTCTAT
Gma.7182.1.S1_at	CD404103	At1g14830	3e-34	Intracellular Traffic			ATGTTAATTCCTATATCGGTATGGTTTGCGATACACTTAAGAATACTATACCAAAGGCCGTGGTTCATTGTCAAGTTAGAGAGGCTAAGAGATCATTGCTAAACCACTTTTATGTTCATGTTGGGANNANGNNNNNGGAGAAATTGGGTGCTATGTTGGACGAAGACCCNGCCCTTATGGANAGGAGAAATCAAATAGCTAAAAGGCTTGAATTATACAAGCAAGCTAGGGATGATATTGACTCCGTGGCTTGGAAATAATGAGATCCCAGGGTTTGCAACAGATGTTACGAGCAAGATTTGTTATAGAATTGATCATTCTTACTATTTTTTAATCAAACACGAACAGAAAAGTCTACGGTTATGGCAAGTTGAATTCGCACTTGCGAATAATTCTTTT…
Gma.6811.1.S1_s_at	CA935869	At5g12380	7e-98	Intracellular Traffic			GTGTGATGGTTGATGGTGTTAATCTGTGTTGATTTTGCTTGAGTCTGTTTTCAGTTTTCCTTGATCATGAGAACTTGGAGTTCTATCTTATAGAGTGGTAATATGATAGCTGTTTGGTGGCTTATAAATTATTANNAANAGGCTCAAAATAAAAGATATCTCAGTGGCCATTTGAATTTTTAAA
Gma.6811.2.S1_a_at	AW100836	At5g12380	5e-95	Intracellular Traffic			GCTACAGAGAGATCCATGGCACTTCCATCTCTAAGAAACTGGTGGATGAAGGATCTGATGAGTTTCAAAGGGCATTGTACACTGCCATTCGTG
Gma.6811.2.S1_at	AW100836	At5g12380	5e-95	Intracellular Traffic			ACTCACCCGTGTGGTCGTGAGCCGGGCTGAGAAGGACTTGAAGATAATCTCAGAGGTTTACTACAAGAGAAACAGTGTTCTTCTTGAGCATGCTATTGCCAAGGAAACCTCTGGGGACTACAAGAAGTTCCTTCTCACACTGTTGGGAAAAGAAGACTAAAAACTTTTCTTCGAGGGCATTTGTGATTATGAGTTTAGGACANTAAGCTATACTTGTGTGTGATGGTTTCATGTGTGTTGGTTTTCCTTGAGTCTGTTTTCANTTTTCCTTGATCATGAGAACTTGGAGTTTTATCTTATAGAGTATTAATATGATAGCTGCTTTGTGGCTTTTAAATTGAANAGGNTNAAAATAAATGATATCTCAGTGCCCATTTTATTTTAAA
Gma.6811.2.S1_x_at	AW100836	At5g12380	5e-95	Intracellular Traffic			GCTACAGAGAGATCCATGGCACTTCCATCTCTAAGAAACTGGTGGATGAAGGATCTGATGAGTTTCAAAGGGCATTGTACACTGCCATTCGTGGCATCAAGGATCCTATTAAGTACTACGAAAAGGTGGTGCGGAATGCAATCAAAAAGGTTGGAACTGATGAGGATGCACTCACCCGTGTGGTCGTGAGCCGGGCTGAGAAGGACTTGAAGATAATCTCAGAGGTTTACTACAAGAGAAACAGTGTTCTTCTTGAGCATGCTATTGCCAAGGAAACCTCTGGGGACTACAAGAAGTTCCTTCTCACACTGTTGGGAAAAGAAGACTAAAAACTTTTCTTCGAGGGCATTTGTGATTATGAGTTTAGGACANTAAGCTATACTTGTGTGTGATGGTTTC…
Gma.6851.1.S1_a_at	CD403658	At1g09630	1e-103	Intracellular Traffic			GCCGGACAGGAACGATACAGAGCAATTACGAGTGCCTACTACCGGGGTGCCCTTGGAGCTCTTCTTGTCTACGATGTCACTAAACCAACCACATTCGAAAATGTTAGCCGATGGCTCAAGGAGCTAAGGGATCACGCCGATGCTAACATTGTCATCATGTTGATCGGGAACAAGACTGATCTCAAGCATCTCAGAGCTGTTGCCACCGAGGATGCTCAGGGTTATGCCGAGAAGGAAGGCCTTTCTTTCATCGAGACTTCCGCTCTTGAAGCAACTAATGTTGAGAATGCTTTCCAGACTATTCTTGCAGAGATATACCGCATTATCAGTAAGAAATCACTCTCTTCCAATGA
Gma.7447.1.S1_s_at	BI967765	At1g01620	1e-138	Intracellular Traffic			CAAGACAAGGGCTTAGGCTCTTGTTTTTGTATGTGCTTGCTTGTATTAGTTGTTATTTATGTNTCTGGNGTCTTCTTCATTTNGAAANTTCATGTNAATCTTTTTGNNTTTNNNNTAATCCATTGTATGGATGTAAATTATGAC
Gma.8407.1.S1_at	AW348317	At1g10630	1e-100	Intracellular Traffic			GGAGGCATTATTTCCAGAACACTCAGGGTCTCATTTTTGTGGTTGATAGCAATGATAGAGATCGAGTGGTTGAGGCAAGGGATGAGCTGCACAGAATGTTGAATGAGGATGAACTTAGAGATGCTGTTTTGCTTGTTTTTGCCAACAAGCAAGATCTTCCTAATGCAATGAATGCTGCAGAAATAACTGACAAGCTTGGACTTCATTCACTCCGTCAACGCCACTGGTATATCCAGAGCACTTGTGCAACTTCTGGAGAGGGTCTCTATGAGGGTTTGGACTGGCTTTCTAACAACATTGCCAGCAANGCATGAGACATTTGAAAAATTTTGGTCTTGTCTGGTGATTTCNTGCNGAGTCTGGCGGTTCTTGGAGAAAGATGCTTATCTTTTCTAGCGA…
Gma.8407.1.S1_x_at	AW348317	At1g10630	1e-100	Intracellular Traffic			GGAGGCATTATTTCCAGAACACTCAGGGTCTCATTTTTGTGGTTGATAGCAATGATAGAGATCGAGTGGTTGAGGCAAGGGATGAGCTGCACAGAATGTTGAATGAGGATGAACTTAGAGATGCTGTTTTGCTTGTTTTTGCCAACAAGCAAGATCTTCCTAATGCAATGAATGCTGCAGAAATAACTGACAAGCTTGGACTTCATTCACTCCGTCAACGCCACTGGTATATCCAGAGCACTTGTGCAACTTCTGGAGAGGGTCTCTATGAGGGTTTGGACTGGCTTTCTAACAACATTGCCAGCAANGCATGAGACATTTGAAAAATTTTGGTCTTGTCTGGTGATTTCNTGCNGAGTCTGGCGGTTCTTGGAGAAAGATGCTTATCTTTTCTAGCGA…
Gma.8717.1.A1_s_at	BU761149	At5g46630	1e-130	Intracellular Traffic			TCTGGTTTACGTGTCCGTTTCCTCAAGGTGTGGGAGAAGAGTGGGTACAATACCGTTGAGTGGGTTCGTTACATTACAAAAGCNGGATCCTACGAGATTAGGTGCTAGACANANTTNGTANNTTNCTGGNTGGAGANTGAAGCNAAAATCCCNAATAAGNCGCAGTNCAGGCTAGTNATCCNAGNTTTCGTATTGTATTAAACATGTAATGANNNAAGGTTCAGGAGTTACTCAATGTGCTGTCAGTATGATT
GmaAffx.32618.1.S1_s_at	BM271526	At3g07680	2e-24	Intracellular Traffic			CAGACTGACCGCCAAGCAATAGTGAACGATGCAATGAGCAGAAGAGCAGTACACAAGGCAATTTTTGAATCAGCAGCACTGATTGGGGCTAGTGCGCTGCAAGTCTACCTTCTGCAGCGATTGTTTGAACGAAAGT
GmaAffx.1301.22.S1_s_at	BI945611	At1g35720	3e-20	Intracellular Traffic			ACACCACCGGTGACTATGAGAAAATGCTTGTGGCGCTTTTAGGACATGATGATGCTTGACATACTCCTTTGTGTTTGTGTGTGTGTACTTGTGGCAGAGTTACTATATAGTGTGCAGTGTACTGCTTTGTGGTTCCAT
GmaAffx.92005.1.S1_s_at	CF807730	At1g30630	1e-108	Intracellular Traffic			GATCCATGACGACGCTCCCACACCTCTCCAAGCCGTCAAACTCCTCGCTCTCTATTTCTCCTCCCCCGACACCAAGGATTCCGCCATCGCGAGTCTCAAGGAGTGGCTTGCCGATCCCGCCATTGCAAACAACGCCACGCTGAGGCTCGTCGCCGGTCTCGTCTTCCTCCATGAAAATGATTTCAACGAAGCCCTC
GmaAffx.91556.1.S1_s_at	CF807281	At2g32670	1e-90	Intracellular Traffic			AATATTGAGAAGGTTCTTGACCGTGGGGAGAAAATTGAGCTTTTGGTGGATAAAACAGAGAACCTTCGCTCTCAGGCTCAAGATTTCAGGCAGCAGGGAACCAAGATTAGGAGAAAGATGTGGTTCCAAAACAT
GmaAffx.91121.1.S1_at	CF806846	At3g07680	6e-78	Intracellular Traffic			TCGTTGTTATTAAGGCTGATTCTCCCTGGCATTACGGCGACGAAGGTGTCGATCTCGTGGTAAAGGGACCTTCTGGCGAGCAAATTCAAGATTTTCGGGACAAGACCAGTGAGAAGTTTGACTTTGTGGCTCACAAATCCGGGGTCCATAAATTCTGCTTCACCAACAAGTCTCCTTATCATGAAACTGTCGATTTTGATGTACATGTTGGTCACTTCTCTTACTTTGAGCAACATGCAAAAGATGAGCATTTCACCCCCTTGCTGGAGCAGATTGGGAAGTTGGAGGAAGCTCTATATAACATTCAGTTTGAACAGCATTGGTTAGAGGCTCAGACTGACCGCCAAGCAATAGTGAACGATGCAATGAGCAGAAGAGCAGTACACAAGGCAATTTTTG…
GmaAffx.91170.1.S1_s_at	CF806895	At5g59840	6e-75	Intracellular Traffic			GAACTATTACCACAGCTTATTACCGTGGAGCCATGGGTATCTTGCTGGTTTATGATGTTACTGATGAAGCATCTTTCAATAATATTAGGAATTGGATCCGCAATATTGAACAACATGCTTCTGACAATGTAAAC
GmaAffx.82790.1.S1_at	BM893351	At1g65320	2e-31	Intracellular Traffic			TTCATTGGCTGCAGTATTGGCTCAGATGCTATCTCACAGGGCAACTCATGTCTGGGTGACCGAGGACGAGAACGATGAAGTTTTGGTCGGTGTGGTCGGATATGCTGATATTTTAGCTGCTGTAACCAAACCACCTACAACCTTCATTCCTGCTAATAGATCTACAGAGGGGTTTGGAAATGAAATNCNNNNNNNNANNTTTTGCTTCAACTTTTTCAATTAGTACTCTTAGCAGTTTGTCTCTTTGGTGCTCAATCATCTCACAGTACATTAAGATGAAAAACGAGTTTGGATTGTTGGTTTGTACA
GmaAffx.83780.1.S1_at	BM886753	At4g21580	1e-132	Metabolism			CCTTGTTGGTTCATGGAGGTTCCAGTGGGATTGGTACATTTGCAATTCANATAGCCAAGTATCGAGGGTCACGAGTGTTTGTTACTGCAGGAAGTGAGGAGAAGCTAGCTTTTTGCAAGAGTATCGGAGCTGATGTGGGCATCAATTATAAAACAGAAGACTTTGTTGCGCGGGTNAAGGAAGAAACTGGTGGCCAAGGTGTTGATGTTATTCTTGATTGTATGGGAGCATCCTACTATCAAAGAAATCTTGATAGCTTGAATTTTGATGGAAGGCTTTTTATTATTGGCTTTCAAGGTGGGGTTAGTACACAAGCAGATCTACGCCCTTTACTTGCTAAGCGTCTCACAGTACAAGGAGCTGGCTTACGCAATAGAAGTCTGGAAAATAAAGCTGTGA…
GmaAffx.82560.1.S1_at	BE058939	At3g29200	4e-17	Metabolism			GAAGTCCAAGACTTATGGGCAAGAACTGGTTGTAACTACGAAGGAACATCGAACTGAACCTGTCTACAAAATAAATCCAAGCTTGGTTGCTGATCTATACAGTGATTGGATCATGCCANNGANAAAGGAAGTCCAAGTTTCTTATTTATTGAGAAGGTTGGATTGAACATAACAAAAAGTACCTTTTCAATTACAGTGTTCATAGGGTATTTATATTTTCTAGGAAATGATACTTGCAATGGGTAATTTCTCTTGAATCATGACTATAAACTTTAGTTTTTGTAATTAACATATGAGGAAGCTCATATTGGGTTCTTAT
GmaAffx.77177.1.S1_at	BE023016	At3g14690	1e-59	Metabolism	Cytochrome P450	CYP72A	CCTTTTGTCCAAAACGTGTCAAGCGACGTTCTTGCTCGTGCAGGCTTTGGAAGTAGCTATCAAGAAGGGAAAAAAATATTCGAACTTCAAAGGGAAATGATTCAGCTTACAATGACGCTCTTTAAGTTTGCTTTCATTCCAGGTTACAGGTTTCTGCCAACGCATACCAACAGGAGGATGAAAGCAATTGACAAAGAAATACGAGAATCACTTATGGTAATCATCAACCGAAGATTAAAAGCAATCAAAGCAGGGGAGCCTACTAACAATGACTTGTTAGGCATACTCTTGGAAT
GmaAffx.77799.1.A1_at	BI967949	At4g34240	0.003	Metabolism			GCTCAATTTGTTTTGAAATCTAGCAGTTGTTGATGCATCTTTCGTTCTTTTTTTTTTTTGTACTTTATCATGCTGTGTAGCTTTATTATTATTTTGTGTTTTAGAAGAAAACAAATAAGCGAGAGTATTGTGCATGAAAAAAGCAAAATGATCAATGCTACTTTTCTTCGTGATCGTGTTAGATGTCTTGTGGTTGTAAATTGTA
GmaAffx.81452.1.S1_at	BF596552	At1g44170	2e-10	Metabolism			ATTCACATTTGAAGCTTTTAGCCACAAAAAAGCAGTTCTATATCGCAGATTTATTGGTGATGCACCAGTAAGGTACCCACCATACACAAATACAAAGATGAGATTGCTGAAAGCTCTCATAGGTGGTGGCATACTTGGTATTATTCGCGCCCTGTTTGGTTGGTGATAGGCTTTAATTTTAATTATATTGGAATTGGAATCTTGATGCTATAGACGGCTTTTAATCTGGCTTCCTTGTATTTTAATCTCCAGTTAATTTTTTTATGTAATACTCATCAACCTTGACTTTTGGATG
GmaAffx.66796.1.S1_at	CA818986	At2g21250	2e-47	Metabolism			GGTCATTCCTAAATCGTCAAAACTGGAGAGGTTGAAAGAGAACTTTCAGGTTTTCGATTTTGAGTTGTCTAAAGAGGACATGGAGCTCATTGGAAGTATAGATAGAAAATATCGAACCAATCAACCAGCTGTGTTTTGGGGCATAGATTTGTATGCGTGAGAATGCCCTTCCTAAGTCTGTATCATGGCTGTTTGACCTTGTGTTAAGATTCAGATTTGGTATAAGCTGATCTTTCAGGCTCCTTAGTAGCTCAGTTTATTTGATAATGTAAACTTTCTTTGTTGATGGTTGAAAAATCATCTTCTCATCCCATATCCAATCTCGTGGACTAAATAAGAGAGACTTCTGAATGTTGTTGCTTAA
GmaAffx.60245.1.S1_at	AW317569	At1g17420	1e-106	Metabolism			GAGGGTGATCCAGAATATGCAAGTTTCNNTGCTGACCCTCAGAAGTATTTNCTGAATGCATTGCCNAGCTTGCTNCANGCCACAAAGTTCATGGCTGTGGTTGACACACTCTCNACTCACTCACCTGATGAGGAGTACTTGGGNGAGAGGCAACANCCTTCNATTTGGTCTGGNGACGCNGAGATNGTNGAGGCGTTCTACGATTTCTCCGCCAAGGTTCNACAGATAGAGAAGGTCATTGATAGCAGGAACCTTGATCGGACTCTAAGGAACCGTTGTGGTGCAGGGGTGTTGCCATATGAGTTGCTTGCTCCTAGCTCTGAACCTGGCGTTACATGCAGAGGGGTGCCCAATAGTGTGTCCACATAACTATACTAAACTAATAAATAAGGGAGTCAC…
GmaAffx.60847.1.A1_at	BU550307	At5g38630	9e-75	Metabolism			AATCAGTTCATCTTGCGTTACAGTTTGCCGCTCTCATTTTGAGCTTGATTGGTGTCTGGGCTGCTTGGAAGTTTCACATTGACAAGGGCATTGACAATTTCTACAGCCTGCATTCATGGCTAGGCCTTGCATGCCTTTTCCTATTCACCATCCAGTGGGGTGCTGGCTTTGCAACATTTTGGTACCCAGGAGGGTCAAGAAATAGTAGAGCTGCCTTATTGCCATGGCATGTGTTCTTTGGTATCTATATCTATTGCTTGGCTATAGCCACAACTGCTACTGGTATTCTAGAAAAAGCTACATTCCTTCAGGTCAACAACATCATATCACGCTATTCCAATGAGGCACTTCTGGTCAATTCCTTAGGCATTCTGATAGTCATTTTAGGTGGCTTTGTGA…
GmaAffx.64037.1.S1_at	BI321162	At2g25160	2e-39	Metabolism	Cytochrome P450	CYP82F	CTGGAAGGAGAGTATGCCCCGGTTCCTCACTGGCTCTGCGTGTCGTGCACATGGTCTTGGCTAGACTCTTACACTCTTTCAATGTTGCTTCTCCTTCAAATCAAGCTGTGGACATGACAGAGAGCATTGGACTCACAAATTTAAAAGCTACTCCACTTGAAGTTCTCCTAACTCCACGTTTAGATACAAAGCTTTATGAGAACTAAAATTATATATTATGCTAGTTTTTTTCCTCAAAATTAGGGGAAGCCTCAAATCGGGGCCTTCCATCATGTAATAAATGTTCAACGGGGTTGCGCTGCTGTTACACTCATAGTTATCACATTTAAATCAGTCATCGACTTGATCAAAGTATTGAGTCATTGGGTTAGGAGGGGACCCAATGAGTCGTTAGTTGAC…
GmaAffx.64615.1.S1_at	BI424359	At3g13110	5e-53	Metabolism			GGGAGACTGCAGTTATTGGGAATAATGTGTCAATTTTGCATAATGTGACATTGGGAGGGACTGGTAAGGCAAGTGGGGATAGACACCCTAAGATTGGTGATGGGGTGTTGATAGGTGCAGGGACTTGTATTTTGGGGAACATTAAGATTGGTGATGGAGCTAAGATTGGTGCTTGTTCTGTTGTGTTGAAGGAAGTGCCACCAAGGACTACTGCTGTTGGGAACCCTGCTAGGTTGGTTGGAGGGAAGGATAACCCTATTAAATTGGATAAGATGCCTAGTTTTACCATGGACCATACTTCATGGTCTGATTATGTTATATAGAAGCTAATTAATTGTCTAACATGTTTTAGAGTTTGTGTTTAGGTGGGAATTGTTTTGGTTGAGGGGGCTTGGTTGT…
GmaAffx.5285.1.S1_at	BM523736	At5g07870	5e-26	Metabolism			TAATGAGCGCTCTGGAATCTGATGAGGAGTTTATGAATGTTGTCTCGGTTTCCAATCCCTTATGCTAGTTTGCTATTGTTCCCACT
GmaAffx.49284.1.A1_s_at	BE658665	At2g36790	6e-07	Metabolism			AGGTGGTTCTTCTTACGACAGTCTCACGGCTCTGATTCATCATTTCAAGACTCTTGTGCCTAATCATGTGAATGGGAATGGGAATATCGATCACTGAATGAATATTACATTGATTCGAGTTTCATGTTTTTGATTATTAGTTATTTATCAAGTGAATGCATGAATGCCATAATTTTAGGGAATCTTAATCCGGGTAACTGGCTAGCTACCCTAAATTT
GmaAffx.90026.1.S1_s_at	CF805751	At5g60600	2e-81	Metabolism			TCTCCATGACCTTCCTTATACAGAAGACAGAATTAGCAGAGTGCATGCAGCCAGACGGTTATTTGAGTACCTATCTGACAATTCTCTAAACTTCCCTGTTATTCACCATATTCAGTTCCCAAATGGGATTCACAGGGATGACTTGGTAATTGGTGCTGGTTCTGATGCTGGAGCCCTTCTGGTTGATGGGCTTGGAGATGGACTACTTTTGGAAGCCCCGGACAAGGATTTTGAATTTATTAGAAACACTTCTTTCAATTTGTTGCAAGGCTGCAGAATGAGAAATACAAAGACAGAGTATGTCTCATGTCCATCCTGTGGCAGAACATTGTTTGATCTTCAAGAAGTAAGTGCACAAATTCGGGAGAAGACATCACACCTC
GmaAffx.89783.1.S1_s_at	CK606640	At1g76490	6e-20	Metabolism			AAATTCTAGGCTACTGGCCACCATTGTAGCCGGTTCAGTCCTTGCCGGGGAGCTATCGCTCATGTCTGCTATTGCAGCTGGACAACTTGTTAAGAGCCACATGAAATACAACAGATCTAGCAGGGATATATCTACAATTGTCCAATGAACTGGCCACAGTACACTTAAACTTGTGTTAGAGACTAATATTCTAATAAGCAAACCATCAGATAAAGACAAAAATAACGAGAAAAAAAAATTGGTATTGATGATGGTGGGGGTAAAAGATAAAGTGATGGTTGGCATCTTCCATGGGCAAATCCAGCTCCCCAGAAGCGTGGGGTTGGTTGGCACTCATTGAATGTCTGCTTCGTGTGAGGCCTTTTCTCTTATGGAGA
GmaAffx.89726.1.A1_s_at	CK605851	At1g55020	0.007	Metabolism			AAGGCAATCAATCAATCTTCTGAGAGTGTTTGGTTGAAAGTAGCAAAGATGTTTCCTTTCGGGCAAAAGGGTCAAAAGATAAAGGGGACTATGGTGGTTATGCAGAAGAATGTGTTGGATATCAACAGCATCACCAGTGTTGGAGGGATCGTTGACCAAGGCTTAGGCTTCATAGGCAGTGCAGTCGATGCACTTACTTTTGCAGCCACCAAAATCTCCATCCAGTTGA
GmaAffx.89628.1.S1_s_at	CK606096	At3g55440	1e-105	Metabolism			CCAGTTTGGGCCATTGGAACAGGAAAGGTTGCAACTCCTGCTCAGGCTCAAGAGGTTCATGCTGATTTAAGGAAATGGGTTCATGACAATGTGAGTGCTGAAGTTGCTGCATCTGTAAGAATTATCTATGGAGGCTCTGTAAATGGAGGAAACTGCAAAGAATTGGCAGCACAGCCCGATGTTGATGGATTTTTGG
GmaAffx.89241.1.S1_s_at	CK605667	At3g17390	6e-71	Metabolism			AGTGGTGCTTACATTGTGAGACAGGCTGCTAAGAGCATTGTGGCAAGTG
GmaAffx.89259.1.S1_s_at	CK605646	At1g55020	1e-28	Metabolism			AAGTGTGGAGTACTGTTGATAGCAAAGATGTTTGGGATCTTCGACAAGGGGCAAAAGATAAAGGGGACAGTGGTNTTGATGCCAAAGANTGTGTTGGANTTNNAANGCCNTAACCTCNATCGGTAAAGGTGGTGTTATTGACACAGCCACCGGCATCTTAGGCCAAGGCGTCANGCTTAGTTGGTGGAGTAATTGATNNTGCCACTTCCTTCTTAGGCNGTAATATCTCCATGCAATTGATCAGTGCTACTCAGACTGATGGCAGTGGAAATGGGAAAGTTGGAAAAGAAGTCTATTTGGAAAAACATCTTCCGACCTTGCCAACGTTGGGAGCAAGGCAGGATGCGTTCAGTATTTTCTTTGAATGGGATGCTAGTTTTGGAATTCCAGGAGCATTTT…
GmaAffx.89435.1.A1_s_at	CK606245	At3g17390	2e-78	Metabolism			GCAAATGGCCTTGCTAGAAGGTGCATTGTGCAAGTTTCCTATGCCATTGGTGTCCCTGAGCCCTTGTCAGTGTTTGTGGACACTTATGGAACTGGGAAGATTCCTGACAAGGAGATTCTGCAAATTGTGAAGGAGAATTTCGACTTCAGACCTGGAATGATCACCATTAACTTGGACCTTAAGAGGGGTGGTCATAGGTTCCTCAAGACAGCTGCCTATGGACACTTTGGAAGGGATGATGCAGACTTCACCTGGGAAGTTGTGAAGCCACTCAAGTCAGAGAAGCCTCAAGCTTAAGAGTGTTGTTAAGTTAATCACTCCCTTCAGTGGATGTCTTGCTGGGTGTGGATGAATAATTTGCGTGTTTCATGACTACTACTACTACTACTCCATTCAATG…
GmaAffx.89562.1.A1_at	CK606162	At3g23810	4e-37	Metabolism			GTCGATTGATGAACTGGGATGCGCCACTGGACACCCCAGTTTTGTGATGTCCTGCTCCTTCACCAACCAGGTCATTGCTCAGCTTGAGTTGTGGAAGGAGAAGAGTACCGGCAAGTACGAGNNGNNGGTTTNCGTTTTGCCCAAGCACCTTGATGAGAAGGTGGCTGCACTTCACCTGGGCAAACTTGGAGCTAAGCTGACCCAGCTTAGCAAGTCCCAGGCTGATTACA
GmaAffx.88740.1.S1_s_at	CK605984	At1g69230	4e-28	Metabolism			GTGGTGGTCAGAGTTCCTTAGGTTATCTCTTTGGCAGTGGGGTGCCTGCCAGCAGTGCAAACAGTCAGCCTGCAAATGGTGCTCGCACTCAAAATGCTAGTGCTCCTTCACCACCAGTCGATAAGCAAAGTCCAGCACCAGCACCAGCACCGGCACCTGCATCATCACCAATTGATAAGCAAATTCCAGCTGGAATTCCTGGAAGTCTTAAAAACAATTACCATCGTGCTGATGGGCAAAACTGTGGCAACTTTCTTACTGATCGGCCATCTACCAAGGTTCATGCTGCCCCAGGTGGCGGATCTTCCTTGAATTACCTCTTTGGTGGTCCTCCAGGGAACTAATTCATCATTGTGATTCAAACCTACCATGTGATGTATCATGTGTAAAATAGATAGC…
GmaAffx.8642.1.S1_at	BU545035	At3g15290	1e-100	Metabolism			GGTAGTGATAACCTCCCATGATTATTCAGGCTTCATAGTGAATCGAATCCTTATGCCTATGATAAATGAAGCATTTTTTGCTCTCTACACTGGTGTTGCAACCAAAGAGGATATTGACACAGGAATGAAGCTGGGTACTAACCATCCAATGGGTCCTTTAGAGCTTGCAGACTTCATTGGATTGGATGTGTGCTTGTCAATAATGAGAGTTCTTCATGCTGGCCTTGGTGACAACAAATATGCACCTTGCCCTCTACTTGTGCAGTATGTTGATGCTGGAAGACTTGGAAGAAAACGAGGTATTGGTGTGTATGAATANNGTAAAGATCCAAGGTCTACAAAATCATCTTCCCGTCTCTAAAATGTTTGTTTCACTTGGAAGAACAAGTTTTCAACACC…
GmaAffx.86175.1.S1_at	AW349132	At5g19440	1e-41	Metabolism			CAATGGTTCACCAACGTTTTCAAATAATAGTTTTGGGTGGATCAATGTGAAAGATGTTGCAAACGCGCATATTCAAGCATATGAGATTGATTCAGCTAGTGGAAGATATTGTCTGGTTGAAAGAGTGATACACTTCTCCGAACTTGCAAAAATTTTACGTGATATGTACCCAACTTTACAGATTCCAGACAAGTGTGAAGACGATGAGCCTTTTATGCCAACATTTCAGGTTTCCAAAGAAAAGGCAAAGAGCTTGGGAGTTGAATTTATTCCCTTGGAAGTGAGCCTCAGGGAGACAGTTGAAAGTTTAAAAGAAAAGAAGTTTGTGGACTTCTAGTTCGTGATATCTCCTAGAAGAATAAATATTGATAACACTAACTTTGTCTAGTCAGTGATTTT…
GmaAffx.90163.1.S1_s_at	CF805888	At5g18670	6e-21	Metabolism			TTCTTCTGAGTCTGGTGTTCCAGGTGGTTTTGAACAAATAAAGAAGAATCTATCTGGAGATATATGTATTGGATTTGTTCACATATCATAGAATGGGAGCATCTTTCTTTTCTCCAGAGCATTTTCCTTTGTTCACCGAGTTTGTCCGGAGCCTTAAGCAACCTGAACTGCATTCAGATGATCTACCGGCCAAGGAGGAAGAAGGCGCCGAATCTGCCATGGATATGAGCCATGAATCAAGTGTGAGCATGCAAGCAGCCTAATGGTTGTAAATTCGTAATGTATGATAATCATGTAGATAACAATTAGTTATACCCTTGGATCAGTGCATGGGATGAGATTGAGAACAGGTTATTTTGTAAGCACAATATGAGAATCTTTTTTGCCGGTTTATCCTCA…
GmaAffx.90296.1.A1_s_at	CF806021	At5g23250	2e-29	Metabolism			GTTGACTGCCTTCAGAAGTTCCTAACTGATCCTCAAACAGAAGGTATCATTCTTATAGGAGAGATAGGAGGAACTGCCGAAGAGGATGCTGCTGCACTAATTAAGGAGAGTGGAACTGAGAAAGCCTGTTGTTGCTTTTATTGCTGGTTTAACTGCTCCNCCCTGGTCGTCGTATGGGTCATGCTGGAGCTATTGTGTCGGGTGGCAAGGGCACTGCACAAGACAAAATTAAAACCCTCAGGGAAGCTGGGGTCACAGTTGTGGAGTCCCCTGCCAAAATTGGAGCTGCCATGCTAGATGTTTTCAA
GmaAffx.90369.1.S1_at	CF807463	At5g17380	0	Metabolism			AATGCAAATTGTACTCCTATGGCTTTTTATGCTTGAATTA
GmaAffx.90332.1.S1_at	CF806057	At5g25880	3e-20	Metabolism			GAATCTTCAACATTATTCTCATGTAATTTACAGCGGAAGCCTTGGCTAAACTGGTGACCGAGGAGAACTACGAAAAGGGCTTGATTTATCCACCATTCTCTAACATCAGAAAAATTTCAGCTAACATAGCTGCAAGTGTAGCTGCCAAGGCATATGAGCTAGGCTTGGCTACACGTCTCCCTCGTCCTCAGAATCTTGTGAAGTATGCTGAGAGCTGCATGTATACCCCTGTCTACCGAAACTATAGGTGAATTATGGGGCAAGTCACTTAACTTTGGCTGTAATAAACATATGTTTTGGTGGCATATGTGAGTTGTTTTATGTAACTTACGCATAAGTGAGAGTGGTCTTATGCTTTTTATTACGAAATCACCAAAACTGCAGGTGAATCATGCTTTT…
GmaAffx.90263.1.S1_s_at	CF805988	At1g55020	1e-80	Metabolism			GGAATTTGCTAGAGAGGTGATTGCCGGTGTAAACCCAAATGTGATCCGTCGTCTTCAAGAATTCCCACCAAAGAGCACACTTGATCCCACTCTCTATGGTGATCAAACCAGTACCATAACAAAAGAACAATTGGAGATTAACATGGGAGGGGTCACAGTAGAAGAGGCACTTAGTACTCAGAGATTATTCATATTAGATTACCAAGATGCATTCATCCCATATTTGACGAGGA
GmaAffx.90450.1.S1_at	CF805871	At4g24380	4e-56	Metabolism			GAAGCAAATTTAGAGATCCCAGCATATGCGATGTTGCCTACAAAGACCCCATCAAAGCTAAATCTGTTCACTTCATTGGGGAAAAAGATTGGCTGAAACTGCCTTCAGAGGATCTAGCGTCTGCATTTGACAAACCCTTCATAATAAGGCATCCCCAAGGTCACACCGTCCCACGATTAGATGAAGTGGCTATCAGTCAATTGAGAAAATGGATTACAGAAGAAGTCCTTTGTCAACCAAAAGTTGAGGTCTCAGTTTGTGAGCGTGAAACAGACCATGAAGAAAAGATGTCAGAGAAGACGACCAAGATAGAACCATGCGGTACCAATCA
GmaAffx.90459.1.A1_s_at	CF806184	At3g08590	4e-58	Metabolism			AAGGCTAGGGATGCTATTCTTAGCGGGAAATTTGATCAGGNNCGCGTCAACCTTCCAAATGGTGACATGGTGGGGCATACAGGTGACATTGAAGCAACAGTTGTGGCNTGCAAGGCAGCTGATGCTGCTGTGNNNNTGATTCTTGATGCAATAGAGCAAGTGGGTGGAATTTATNTTNTCNCNGCTGACCANGGGAATGCNGAGGATATGGTCAAGAGGGATAAATCTGGAAAACCACTTCTAGGCNNGGATGGAAAAATCCAGATTCTTACTTCCCATACTCTTGAGCCTGTGCCAATTGCTATTGGNGGTCCNGGATTGGCCCCTGGTGTNAGATTCCGNAANNATGTTCCAACNGGNGGNCTTGCCAACGTTGCTGCAACTGTGATGAATCTTCAT…
GmaAffx.90936.1.A1_s_at	CF806661	At4g24160	7e-71	Metabolism			TACAAGTGCTAGGTTTGGTACACATTCAACTGGGGAAATACTGACTGAAGAGGAATCAACATTGCTGACAGACTATGTTTACCACACATTGGCGGCCAAAGCTAGTGGAGAGCTGTGCTTAAAATATATTTTTTCATTTGGAGCATTTGCTAGGATGCCCCTTCTTCTCAGTGCCTCAGAGTGGAAGGTGCCCACCACTTTCATGTATGGTTTCCAAGACTGGATGAATTATCAAGGTGCCCAAGAAGCTCGCAAGCATATGAAGGTTCCATGCGAAATCATCAGGATTCCTCAGGGTGGGCACTTTGCGTTCATTGACAACCCAACTGCCTTCCATTCAGCTGTTTTTTATGCTTGTCGAAGGTTTCTTACACCTGATCCAGACAATGAATCTCTTCC…
GmaAffx.90954.1.S1_s_at	CF806679	At4g30440	1e-113	Metabolism			TGCAAACCGGGTTGAAGAAGTTCGTCAAGTGGTACCTTTCCTATTACGGCTACAATCACGGCAAACCTGTAAATTAAT
GmaAffx.90963.1.S1_at	CF806688	At4g13940	1e-109	Metabolism			TCCAGACCGCCGTTCTCATTGAGACCCTCACCGCCCTTGGCGCCGAGGTCCGCTGGTGCTCCTGCAACATCTTCTCCACCCAGGACCACGCCGCCGCCGCTATTGCCCGCGACAGTGCCGCCGTCTTCGCCTGGAAGGGTGAGACCCTCCAGGAGTACTGGTGGTGCACCGAGCGCGCCCTCGACTGGGGCCCCGGCGGTGGACCCGACCTCATCGTCGACGACGGTGGTGACGCTACCCTTCTCATCCACGAAGGCGTC
GmaAffx.90963.1.S1_s_at	CF806688	At4g13940	1e-109	Metabolism			ACTTCGGCCGCCTCGAGATCGAGCTGGCCGAGGTCGAGATGCCCGGCCTCATGGCCTGTCGGACCGAGTTCGGCCCCTCCCAGCCCTTCAAGGGGGCCCGCATCACCGGCTCCCTCCACATGACCATCCAGACCGCCGTTCTCATTGAGACCCTCACCGCCCTTGGCGCCGAGGTCCGCTGGTGCTCCTGCAACATCTTCTCCACCCAGGACCACGCCGCCGCCGCTATTGCCCGCGACAGTGCCGCCGTCTTCGCCTGGAAGGGTGAGACCCTCCAGGAGTACTGGTGGTGCACCGAGCGCGCCCTCGACTGGGGCCCCGGCGGTGGACCCGACCTCATCGTCGACGACGGTGGTGACGCTACCCTTCTCATCCACGAAGGCGTCAAGGCCGAGGAGC…
GmaAffx.90733.1.A1_s_at	CF808300	At5g15490	1e-112	Metabolism			ATAAGGCCAACCTGAGCATATACGATCCACAAGTAACTGAGGACCAAATTCAGAGGCATCTATCNATGAACAAGTTTGATTGGGATCATCCTATCCACTTGCAGCCCACAAGTCCTACTACTGTGAAGAAGGTCAGTGTTGTTTGGGATGCCTATGAAGCAACAAAGGATGCACATGGCCTTTGCATTCTAACCGAGNGGGATGAGTTCAAGACTCTTGATTACCAGAAGATATTTGACAACATGCAAAAACCAGCATTTGTTTTTGATGGCAGAAACATTGTGGATGCTGATAAGTTGCGTGAGATTGGCTTCATAGTTTACTCAATTGGTAAGCCCCTGGACCCATGGCTCAAAGACATGCCTGCTGTGGCATAAAATAGATCATTGATCAAGTACA…
GmaAffx.90600.1.S1_at	CF806325	At3g57520	1e-101	Metabolism			AGCAGATTATCATGCTGCAGCTCGTGCAATTGGTGGATGTCCTATTTATGTTAG
GmaAffx.90600.1.S1_s_at	CF806325	At3g57520	1e-101	Metabolism			GACAAGCCAGGCAATCACAATTTTGATCTTCTTAAGAAGCTGGTTCTCCCGGATGGTTCGGTTCTCCGTGCTCAGTTACCTGGCAGGCCAACTCGTGATTCTCTATTTGTGGATCCAGCCAGAGATAGGACTAGCTTGCTCAAAATATGGAACCTGAACAAATGCTCTGGAGTTGTTGGTGTATTTAACTGCCAAGGTGCTGGATGGTGCAAGATAGAGAAGAAAACCCGCATCCATGATACATCTCCTGGTACACTCACCGCCTCTGTCTGCGCCTCTGATGTTGACCTCATCACACAAGTAGCAGGTGCTGAATGGCTTGGAGATACAATTGTTTATGCTTACAGATCAGGTGAGGTGATTCGGCTACCAAAAGGGGTTTCAATTCCAGTGACACTA…
GmaAffx.91462.1.S1_s_at	CF806716	At4g01850	1e-113	Metabolism			GCGACCAAATCTCCGATGCTGTCCTCGACGCTTGCCTNGANCAGGACCCAGACAGCAANGTTGCCTGCGAAACATGCACCAANACCAACTTGGTCATGGTCTTCGGAGANATCACNACCAAGGCCAACGTTGACTACGAGAAGATNGTGCGTGACACCTGCAGGAACATCGGCTTCGTCTCAAANGATGTGGGACTNGATGCNGACAACTGCAAGGTCCTNGTNAACATTGAGCAGCAGAGCCCTGATATTGCNCAGGGTGTNCACGGCCACCTTACCAAAANACCNGANGAAATNGGTGCTGGNGACCAGGGTCACATGTTTGGCTATGCCACNGANGANACCCCNGAATTGATGCCATTGAGNCATGTTCTTGCAACNAAACTCGGTGCTCGTCTCA…
GmaAffx.91462.1.S1_x_at	CF806716	At4g01850	1e-113	Metabolism			GACTGTTGAGTATTACAATGACAACGGTGCCATGGTTCCAGTTCGTGTCCACACTGTGCTTATCTCCACCCAACATGATGAGACTGTGACCAACGACGAAATTGCAGCTGAC
GmaAffx.91944.1.S1_s_at	CF808330	At1g59950	9e-91	Metabolism			GAAGCTTCAGAATCTGCTCTCTGTTGCTACCATCCGTCCCGTGGTCGATCAAGTGGAGATGAACCTTGCATGGCAACAGAAGAAGCTAAGAGAGTTCTGCANAGAAAATGGGATAATACTGACTGCGTTCTCTCCACTGAGGAAAGGTGCGAGCAAGGGCCCAAATGAAGTGATGGAGAATGATGTGCTGAAAGAGATTGCAGAGGCTCATGGGAAATCCATAGCCCAGGTGAGTCTGAGATGGTTGTACGAACAAGGTGTGACATTTGTGCCAAAGAGCTACGATAAGGAGAGGATGAACCAGAATCTGCA
GmaAffx.91821.1.S1_s_at	CF807546	At1g80360	1e-106	Metabolism			GGTATTCCTGAACTCAGAGCAGCATTAGTCAAAAAGTTGCGTGATGAAAATAATTTGCACAAATCTTCAGTAATGGTTACATCAGGTGCCAATCAGGCATTTGTGAATCTAGTTCTTACTCTCTGTGATCCGGGTGATTCNGTGGTTATGTTTGCTCCTTACTACTTCAATGCNTACATGTCCTTCCAGATGACTGGCNTTACCAATATTCTAGTTGGTCCTGGTAGCTCAGACACACTCCATCCTGATGCAGATTGGTTGGAAAGAATATTATCAGAAANTAAACCNNCTCCAAAGCTTGTTACTGTTGTAAATCCAGGCAATCCATCTGGAACTTACATTCCAGAGCCCCTTCTAAAGAGGATTTCAGATCTCTGCAAGAATGCTGGCTCTTGGCTT…
GmaAffx.92117.1.S1_s_at	CF807842	At5g37600	5e-89	Metabolism			GCAGAGTACATATGGATCGGTGGATCAGGAATGGACCTGAGGAGCAAAGCAAGGACTCTCCCAGGACCAGTTAGCGACCCTTCAGAGCTTCCCAAGTGGAACTATGATGGTTCCAGCACAGGTCAAGCTCCTGGTGAAGACAGTGAAGTGATTTTATACCCACAAGCCATTTTCAGGGATCCATTCAGAAGGGGTAACAATATCTTGGTTATCTGTGATGCCTACACTCCTGCTGGAGAACCTATTCCCACTAACAAGAGGCACGCTGCTGCCAAGGTTTTCAGCCATCCTGATGTTGTTGCTGAAGTGCCATGGTACGGTATTGAACAAGAATACACCTTGTTGCAGAAAGATATCCAATGGCCTCTTGGGTGGCCTGTTGGTGGTTTCCCTGGACCT…
GmaAffx.92143.1.S1_s_at	CF806865	At5g22140	3e-17	Metabolism			GGGAGAGAGAAAATTTCAAGCACAAAAAATGGCGGAGAAGAAAGTGGTGATCCTAGGAGGTGGTGTTGCCGGTGCCAACCTTGCAAAAACTATACAACGTCAAGCCAACGTCACCCTTATTGATCCGAAGGAATATTTTGAGATTCCATGGGCAAGTTTGAG
GmaAffx.92410.1.S1_s_at	CF808078	At1g51410	1e-118	Metabolism			TGACCTACTTGACCCAGCAGTGAAGGGAACTCTTAACGTTCTTAAATCATGTGTAAAATCGCCATCTGTGAAACGAGTCATCTTAACATCTTCTGTGGCTGCAGTTGCATATAATAAAAGGCCTAAAAGTCCTGAAGTTGTAGTTGATGAAACCTGGTGGTCTGATCCAGATTACTGTAGGGAATTAAAGCTGTGGTATTTACTTTCAAAGACTTTGGCTGAAGATGCTGCCTGGAAATTTGCCAAAGAAAACGACCTTGACTTGGTTGTTGTTAACCCAGCAATGGTTGTAGGGCCTCTTTTGCAAGCAGAGCTTAACACTAGTGCTGCTATTATTTTAAACCTAATAAATGGTTCAGAAACTTTTTCAAATGATACATATGGATGGATCAATGTGAA…
GmaAffx.93267.1.S1_s_at	CF808992	At2g26230	4e-61	Metabolism			GCGTGGGCATCACTCTCTTCTCAGACTGCGTCAACTCGTATCTCCGCGATGACAACTCTGACATCGTTGCTACTGATACCATGAAAAACACAGTGTATGCAAAAGCAAAGGAATGCTCAGACATACTTTCTGCTGAGGACTTTGCTATTTTGCTTGCT
GmaAffx.93598.1.S1_at	CF809323	At1g01470	3e-59	Metabolism			ATCATCATCAATAATGGCGGAGTTGTTGGAAAAGGCCAAAAACTATGTTGCGGAGAAAGTCACCAACATGCCCAAGCCAGAGGCGAGTGTCACCGACGTGGACTTCAAGCGCGTGAGCCGCGACAGCGTCGAGTACTTGGCCAAGGTCTCCGTTCAGAACCCTTATTCCACTTCCATTCCCATTTGTGAGATCAAGTACTCCCTCAAAAGTGCTGGCAGGGAGATAGCAGCAGGAACAATACCTGACCCAGGGTCATTGAAGGCAAGTGACACAACAATGTTGGATGTGCCAGTGAAGGTGCCTCATAGCATATTACTGAGCTTGGCAAAGGACATTGGTGCAGATTGGGACATTGATTACCAATTGGATATTGGACTTGTTATTGACCTTCCTGTCAT…
GmaAffx.9360.1.S1_s_at	BI787001	At1g02500	3e-11	Metabolism			TCATCTCCACACAGCATGATGAGACTGTCACAAATGATGAGA
GmaAffx.93157.1.S1_s_at	CF808882	At2g37790	2e-48	Metabolism			GATATTCTCCACTAGGTTCACCAGCAGCTCTCAAAAGTGATATTCTTAAGAATCCTGTTGTCACAGAGATTGCAGAGAGATTGGGGAAGACACCAGCACAAGTTGCCCTTCGATGGGGCTTGCAAGCAGGTCATAGTGTGCTTCCTAAGAGCACTAATGAGTCCAGAATCAAGGGAAATTTTGATATCTTTGACTGGTCTATTCCTCAAGATTTGATGACCAAGATCTCTGAAATTAAGCAGGAAAGGCTAGTTAAGGCCAGTTTTTTTGTTCACGAGACCTATGGTGCCTATAGGAGCATTGAAGACTTCTGGGATGGTGAACTCTGAGCAATATGCATCTTTGAGACGTTGAAAAATACATTGCTCCTAGAGC
GmaAffx.93553.1.S1_s_at	CF809278	At1g55020	3e-42	Metabolism			GAAAAACTAGAAAAGATCCCAACAGTGAGAAGCCGAGCGATTTTGTTTACCTTCCAAGAGATGAAGCATTTGGTCACTTGAAGTCATCAGATTTTCTCGCTTATGGAATCAAATCTGTATCCCAAGATGTCTTGCCTGTCTTGACTGATGCATTCGATGGAAATATTTTGAGCCTTGAGTTTGATAATTTTGCTGAAGTGCACAAACTCTATGAAGGTGGAGTTACACTACCTACAAACTTTCTTAGCAAGATCGCCCCTATACCAGTGATCAAGGAAATTTTTCGAACTGATGGCGAACAGTTCCTCAAGTATCCACCACCTAAAGTGATGCAGGT
GmaAffx.93074.1.S1_at	CF808799	At3g02360	1e-115	Metabolism			GCTTGATACAAAATTGTCCCAGCTCATGGTGCCTTTTTAATTTTCACATTT
GmaAffx.92834.1.S1_at	CF808559	At5g28050	6e-81	Metabolism			GCGAGGCACTGGATTCTACCAGAAAGCACAATTGNAGATTAAAAGGGCTGATGGCAAAGCGGCAAACATTGCTGAAGAA
GmaAffx.92834.1.S1_x_at	CF808559	At5g28050	6e-81	Metabolism			TAGCTTCTGCGTTTGCTGGACATAAGGAAGCTATACAGCAAAGGGACCACAAATTTTTAAGAATTGCTGTTGAAGAAGCCTATAAAGGGGTAGACTGTGAAGATGGGGGTCCCTTTGGTGCTATTATAGTATGTAATGATGAAATAGTTGCTCGATGTCACAACATGGTTCTGAGGAACACAGACCCTACTGCTCATGCAGAAGTCACTGTTATAAGAAAGGCTTGTGAAAAGTTAAACCAGATAGAACTTTCAGACTGTGAAATATATGCTTCTTGTGAACCTTGCCCTATGTGCTTTGGAGCAATTCACCTCTCACGAGTTAAGAGGTTGGTTTATGGAGCAAAGGCAGAGGCAGCAATTGCTATTGGATTCGATGACTTCATTTCAGATGCATTGC…
GmaAffx.92851.1.S1_s_at	CF808576	At1g59950	7e-91	Metabolism			ATCCCTCCCGCAGTGAATCAAGTAGAAGTTAACCTTGGGTGGCAACAACAGAAGCTTAGAGATTTCTGCAAGGAAAAGGGTATTACTGTAACTGCCTTCTCACCCCTGAGGAAGGGTGCTAGTAGGGGTGCTAATTTTGTGCTGGACAATGATGTAATCAAAGAATTGGCAGATGCTCATGGCAAGACTGCAGCCCAGATTTGTCTTCGATGGCTATATGAACAAGGGTTGACTTTTGTGGTTAAGAGCTATGACAAAGAGAGGATGAAGCAAAACTTGGGGATTTTTGATTGGTCACTGACTGAGGATGATTACAAGAAAATAAGTGAAATCCACCAAGAGAGGCTCATCAAAGGACCAACCAAGCCTCTTCTTGATGATCTATGGGATGAAGAATGA…
GmaAffx.92525.1.S1_s_at	CF808250	At2g45550	2e-46	Metabolism	Cytochrome P450	CYP76C	TGTTTCTAGATTTATTTGTGGCTGGAATAGACACAACATCAAGCACGATAGAATGGGTAATGGCTGAGTTGCTACGTAACCCTGAAAAACTAGAAAAAGTTAGGCAAGAGCTTCAACAAGTCCTTGCCAAAGGTGAACAACTAGAAGAATCACATATCTCGAACCTTCCTTACCTACAAGCAGTGGTGAAAGAAACTTTTCGCTTGCATCCACCCACCCCAATGTTACTGCCACACAAGTCAGAAGTCGATATTGAACTATGTGGCTTCATGGTGCCT
GmaAffx.92722.1.S1_at	CF807561	At1g47480	7e-65	Metabolism			CTCGAAGCCAATTGGGTCGGAGGCTGTTGAGGGGCACGAGCAGAGTTTGGCCATGAAGGTCTGGAACTTTGCCTGCCCTGATGCCCCCGGTGGAATCGATAACCCCTGGATCAACCCCTGTGTTCCTGGGGCACCCTCTTTGGCCACTCTTGCCTGCTCTAAGTTGCTCGTTACTATCACTGGCAAAGACGAGTTCAGAGACAGAGATATTCTCTACCACCACACCGTTGAGCAAAGTGGCTGGCAAGGTGAACTTCAACTCTTTGATGCTGGCGATGAGGAGCATGCTTTCCAGCTCTTCAAGCCTGAGACTCATCTTGCTAAAGCCATGATCAAACGCTTGGCTTCTTTTCTGGT
GmaAffx.1301.92.S1_s_at	BM527505		2.1e-47	Metabolism			GTCAACATCCGCAGGGACCATCGCAATGCTTTGTTTTAATTAAACAGTCGGATTCCCCTTGTCCGTACCAGTTCTGAGTTGACTGTTCGAC
GmaAffx.1301.127.A1_at	CD406089	At2g44160	3e-05	Metabolism			ACTTTAGCTATGTCACTTCTGTTGGTTGTCATGTTCTTTTCCTTTCTTTTGTTTTCTTCTCAGTATGATGATTCATATTACACATGGTTCTAAGTTGAAGTGCCAAATTATTTTTCTGGGCTATGTCCCTAACGTCTTTATATTTTCATTCTTCAAAGTCGCATGGGTAACCTGTACGTTGACATAAGGACAAGTTACTCCTTCCTCTGAATTGGATGTTTCTTAAT
GmaAffx.1301.39.S1_at	BI785728	At5g23250	1e-110	Metabolism			AAGGATAGTGGAACTGAGAAGCCTGTTGTTGCTTTTATTGCTGGTTTAACTGCTCCCCCTGGCCGTCGTATGGGTCATGCTGGAGCTATTGTGTCGGGTGGCAAGGGCACTGCACAAGACAAAATTAAAACCCTCAGGGAAGCTGGGGTCATGGTTGTGGAGTCCCCTGCCAAAATTGGAGCTGCCATGCTAGATGTTTTCAAGCAGAGGGGCTTGGTTCAATAGTTTGGGTTCATTTAATTTCATCAAGTCATTTTGGTTTCGATTATTTACAAACTGTTCAAAATTTCTTGATTCCCATTGGTAATGATGGGCTATTTTTTTTTTATTTTTTTTTTAAGTTACGAGAGGGGCATTAAAATAAAATTCAAGATGCTTTATATTTGCAGAAAGTTTGAT…
GmaAffx.11858.1.A1_s_at	AW351023	At4g34920	4e-17	Metabolism	Phospholipid Biosynthesis		AGTCAGTGCTTCTCCAAAGGGTATGCAGATAGACTGCAGATTTTTTCTACGGATTTCATTGACCAGGATTTCGTTGATGCATGCGTTGGACTCACACGTGCCAGGGTTGAGGGTAGAGCCTGAAAATTGAAATTATCTCTCTTATGCTCGTAACTCTTCTTGTTCATGGTTCTGTCTCTTTT
GmaAffx.15940.1.S1_at	AI522941	At1g12240	6e-48	Metabolism			TCTCTTCCCTTGTTGCCTTTGGAGGGTACAGGGCCTCCAACGCGCCNCATGCNGACGTGNCATCGNCANCATCGAACGATGANCAACCTAGTCCNACATCGGTGCCTTCTCCGAAATGGTACCCGGTTTCNCGNGGTGTTTCTTCNGGGGTGTCNGAGAAGTCATCAAGCATGTTGTTTGCGGTTAAAGATGGAGCTTCGNANGCATTTCCNTGGGACAANAGCATGNTGTCNTGGCAGAGAACTGCTTTTCATTTCCAACCAGAGAAAAACTGGATGAACGATCCNAANGGTCCTATGTACTACAAGGGATGGTATCACTTNTTCTACCAATACAACCCGAACGGTGCAGTTTNGGGTGACATAGTTTGGGGACANGCAGTNTCAAGGGACATGATCC…
GmaAffx.23763.1.S1_at	BU579160	At5g65110	0	Metabolism			GAATGACATTGGAACCTACCGAAATGTTGACTATGTGGCTCCCAACAAAGCCAAGGCAATCCACAAGCTCGCGGAGTATCTTAGTTTCCAAGTGAGGAATATTGCAAGGGAACTTGTTGATGCATTTGATCTTCCGGATCACGTTACACGGGCCCCCATTGCCAAGCGGTCAGGGGCCTACTCGCAGTACACACAATATGTGGGATTTTAAAAAAAGGAACGCAAAGAAGATTGATGTATTTGCGGGAATTAACATGAGAAAATATTTTCTTGGCTCATTGTTGAAATTTATATGCTAGTGGTTGCTCCTGACCAAGAAACTACTACACACGACCAGAACCATAAATGAATGAAATGAAGTTTCAGTCGAANANANNANNNNAAANNNAAAANNANNNN…
GmaAffx.24756.2.S1_at	BI316523	At5g02310	2e-89	Metabolism			TAAACTTGGGTCCTGTCGGAGAATCTACCTACTGGTCATGGCTGTACAGATTCTACTGATGCTGACATAGCTGCAAGCTTTCTTCTGCTCCATGCCTTTCCATAAAGTAGGTGCACATGTGTACATATATCATCATACTAGTGAGAGGAGCAATTGCTTCAAGGTATAGTTTGTGGAATTATGGGCTTATCAGTGGTTTAGGATGTCTGAAGACAATAATGTTGGTTCTGTATCCCTTCCTCTCCGTTTCTTTTTAGTTGGGCCATCCCCTCTACCCAGGTAGAGGAAGCAGGATAATTCCCTTGGGCATATTGTATACAAGGTATATATACATACTGATTTTTACTGTCAATATATGTTTGCTTTTTAGTATATTTCAGCAACAATGCTAATAGACTA…
GmaAffx.26275.1.S1_at	BU547220	At4g34200	1e-96	Metabolism			AACTTGGTTAATGCTGATTTCACTGCNAAGCAAAGAGGGATCAGGATAACTGAGGAGANGGTTATTCTTGATGGTTCACCTGAGAATCCACTNGAATTCNTTCAGGTNCAGATTGCTAATGTGGAATCNCGATTTGCTAGTGCNATATCAGATTCTGGGGAGATTAAAGTTGAGGGTCGGGTNAAAGATGNNATCCCCCATCTNACAAAGGTTGGGTCTTTTGATGTTGATGTNAGTTTGGAAGGTAGNATCATACTGTGTAGGCANGTAGATCAACCAGGCATGATNGGAAAGGTTGGGAGCGTTTTGGGNGAGGAGAACGTGAATGTNAGNTTCATGAGNGTNGGAAGNATNGCTCCACGCAAGCAAGCTGTTATGGCAATTGGAGTGGACGAACAA…
GmaAffx.37677.1.S1_at	BE022626	At1g49650	8e-09	Metabolism			TTGTCACCATTATCAATACCTATCACTGTATGTGGT
GmaAffx.37677.1.S1_s_at	BE022626	At1g49650	8e-09	Metabolism			TAAGTTGCTCGTTACTATCACTGGCAAAGACGAGTTCAGAGACAGAGATATTCTCTACCACCACACCGTTGAGCAAAGTGGCTGGCAAGGTGAACTTCAACTCTTTGATGCTGGCGATGAGGAGCATGCTTTCCAGCTCTTCAAGCCTGAGACNCANNNNGCNNNNNNCNNNATNNNNCNCNNGGCTTCTTTTCTGGTTTGATGGATGGCTTGTCATGAGAGATTCCAAACATAATAAATCGTGCGTGCCTTCACCTGTCTTGTCTACTACTCCAGTTTTA
Gma.9110.1.S1_at	BE658682	At5g09650	1e-106	Metabolism			GTGAGGTTCTCAAGGTCAAACCCTTGGGTGCATTAGCCATGATTGATGAAGGAGAACTTGATTGGAAAATAGTTGCAATTTCATTAGATGATCCGAAGGCGCCATTTGTAAATGATGTTGATGATGTTGAGAAGCATTTTCCAGGAACTCTAACTGCAATTAGGGACTGGTTTAGAGACTACAAGATACCTGATGGAAAACCTGCTAATAAATTTGGACTTGGCAACAAGGCAGCAAATAAGGATTATGCGCTTAAGGTCATCACAGAGACCAATGNAGNCNNNGNANTAAACTTATCAAGAGATCAATTCCTGCAGGAGAGTTGTCACTTGTGTAGAGATGTATTGGGGGAATGTCTATTGTTCATGCCATTGCTTGCATTTTCTACAATTCTATTTA…
Gma.8509.1.S1_x_at	AF320024.1	At2g26670	1e-101	Metabolism			GGTTATACCATTCCTGAACCTTCTTCTCCTGGTCTTACCTATGCACAATATCTTAAGGAGTTATCTGTGAAGGATCCCCAAGCATTCATTTGCCATTTTTACAATATCTACTTTGCTCATTCAGCTGGTGGTCGAATGATTGGGAAAAAGGTTGCTGAAAAGTTACTTAACAACAAGGCGTTGGAGTTCTACAAATGGGATGATGACCTTCCACGATTGTTGCAGAATGTGAGAGACAAGTTGAATAAAGTTGCTGAACCTTGGAGTCGGGAAGAAAAGGACCACTGTCTGGAAGAAACAGAAAAATCATTCAAGCTCTCTGGAGAGATTCTCCGTTTGATTTTATCATGATAATAGATGCCCTGCTATCTGTGTAATTATGGGTATTAAAGTGCATGG…
Gma.8520.1.S1_at	CA802722	At5g51260	5e-54	Metabolism			GCTTGCTGGATATCACACATGGGAAAAGTTAATTACCAAGAATACATCTGAATACCATGGTAAGACAGCAGTTACATACAAATCTACTGAGAGAAAGAAGCTGGAGGAAAAAGGATACAAAATCATTGGAAACATTGGAGACCAATGGAGCGATCTATTAGGAACCAACACAGGCGATAGGACCTTTAAGTTGCCTGATCCCATGTACTACATTAGTTGAGGTCTCTAGGGCTCTTACTAGCATGTTCCTATGAATAAAATAAGATGCATGTTGTAATAATGGAGAGATCGACTTAAACCAAGGAGCACTCGTTAATTAANTGCTATGTATGTNNNNGACTTTGTGTGAGACAAAAGGTCACGTGGTAAGAGACTGTACAAGCACAACGGTGTTTTATC…
GmaAffx.10297.1.S1_at	BE475510	At3g13750	7e-42	Metabolism			GCACAGTGACAGTGTCTCCTGAAATTTTTGGAGGAGATCCTTGTCCAAGTGTCATGAAGAAACTCTCAGTGGAAGCCATTTGCACCTGATCATTTTCAATCTCCGAAAATAAGTGGAATAAAGTTTCCATATTGATTTATTCTGCAATTGAATACATGGTCTTTGGGTCAAAGTTTACACCTGTAGACCACCAGAGGCATTAATTTGGCTTTACCAAGGTGAAGTTGCAAATGAACACAACACACCATGTGGTTGAAAGCCTGCTGGGATGATTGTNGNGGNTTTNTGTGTATATATATTGGTGTTGTGNTTGTTATACTGANGTGGAGGAGAGGNTGAAAANGNTACCTGATGCACATTGAGACGACATCGATTGAGTCCATGTGCAAANTTGGTTTT…
Gma.9828.1.S1_at	AF529301.1	At2g32150	3e-83	Metabolism			CAGACTATGCAGTGGAGTGTGTGAATGACTTGGCACAAGTGATCCCAGAGATATGGGCAAACGAAATGGACGGTGAGGATCAAACGATGACACGTACCAAGAGTGAATTGGAGGCCGTACTCGCGTGTGCTGTGGTTGGAGCTTGAAAAGTGTTTGGATGTGGAGGAGGATAAGGCCTGACGTTGTACAATGTACATTCCCAAACCAACCCAACTATCTAAGCAATTAAAATAATAGCAGCAAGTACTATCAGAACACCAACAACCAAGACAATAACAATAAGTAACATGGGCCCCTA
Gma.9551.1.S1_at	AY157739.1	At4g09320	2e-72	Metabolism	Nucleotide Biosynthesis/Metabolism		GAGAAGAAAGGTTTCTACTTGAAAGGTTTGAAACTTGTTACTGTGGACCGTCCTTTTGCTGAGAAGCACTATGCTGATTTGTCTGCCAAGCCTTTCTTTAGTGGTTTGGTGGATTACATTATCTCTGGCCCTGTTGTTGCCATGATCTGGGAGGGCAAGAATGTTGTTACAACTGGCCGAAAGATTATCGGAGCCACAAACCCAGCTCAATCTGAGCCTGGAACTATCCGTGGTGACTTTGCCATTGACATTGGAAGGAATGTTATCCATGGAAGTGATGCAGTTGAAAGTGCTAACAAGGAAATTGCATTGTGGTTCCCTGAGGGCCCTGCTAACTGGCAAAGCTCCCAACACTCTTGGATCTATGAGTAAATCATATGCCTCAAGTTGATCTTGAAA…
Gma.9622.1.S1_s_at	BQ610840	At5g54160	2e-48	Metabolism			GATTCATATCAAGTTGCATTTGGATTTTGACTTTGAGACTCTGCTTGGGGTGCTACTTACGAATGTTTTCCCGGAAAAACGTAAATTTCTTCTAATGCTTTATGAAAAGAATAACGAACAAGTTCAATGTATACCGCCTTTATAAAATAATA
Gma.7613.1.S1_at	BG508937	At3g05970	5e-66	Metabolism			GTGAAAATTGAGAGTCTCCCCCCATCACCAACCACAACATAAAAAGAGAGAGGTAAATAAAGACACGCTACTCATACGCATCGTATGCAACATAGCAGAAGCATCCAATGGGAACGATTTTGCAACTTACTGTTGTATTGTATTGATAATAAAGAGTTGTGCTAGAACCGGAATATGATTCGTAGCATTATTTATGTAGCCTACGCTCCGTTACGTTCAAGTTGCCTTACGCCATTTTTATAATT
Gma.7625.1.S1_s_at	U04526.1	At1g55020	0	Metabolism			GAGGGAGACTCCAAATTGGACTACTGATAAGAAGGCATTAGAAGCTTTCAAAAGGTTTGGAAGCAAACTGACTGGAATTGAAGGAAAAATCAATGCAAGGAACAGTGATCCAAGTCTGAGAAACCGGACTGGGCCAGTTCAGCTGCCATACACTTTGCTCCATCGTTCAAGTGAGGAAGGGTTGACTTTCAAAGGAATTCCCAACAGTATCTCTATCTAATTAAAAAGAGTTTGTGGTTTCCTTATCTATGTTGTACTTCTGAATAACATAGACTTTATGCATGTCTATGCGTAATTATTGCCTGAACTTCTGCACTAT
Gma.8251.1.S1_a_at	AW394443	At4g34230	1e-125	Metabolism			GAAAGTATACTACTAGCACGACACACGCAACATCCATCCTTCCATCATGAAGAGTCTGGAAAAGTTATTAATTAATTGAGAACTAAAGCTGTATTTGTTGTTCACTCTAAAAAAGAAGCTGTGTTTTGTTTATTAAAAAGAGTGCTCTGTTTTCTCTGTTTTGGTTACACGACGTTCATTAAAATATAGTATTTGATATCAAATTCTCGTGGAAAGCAAAAGACACCATAGTTTTGTTGTGTA
Gma.8351.1.S1_s_at	AI443561	At5g19440	4e-99	Metabolism			AAATGCATCTTTTGGTTGGGTCAATGTGAAAGATGTTGCAAATGCCCATATTCTAGCATATGAGAATGCTTCAGCTAATGGAAGGTATTGTTTGGTGGAGAGAGTGGCACACTACTCAGAAATTGTGAAGATTTTACGTGATTTGTACCCGACATTACAACTTCCAGAGAAGTGTGCAGATGATAACCCATATGTGCCAATATATCAGGTATCCAAAGAAAAGGCAAAGAGCTTGGGGATTGAATATACTCCTTTGGAAGTGAGCCTCAAGGAGACTGTGGATAGCTTGAAAGAAAAGAAGTTTACCAACTTTTAATTTGTGATATCTCCTAGAGGAGAAAACGTTAATAATAGAAACCTTGTGTGGTTGGTCACTTGGCTTGTGATGCTCATGCTTCT…
Gma.8065.1.S1_at	AW309960	At5g16990	1e-130	Metabolism			ATATAAGCGGATTCGTTTGCAAGGCTTTAACTTCATGGATTTCGTTCACCTATATCCCAAGTTCTTGGAGTTTCTCCTGCCAAATATCAGAGAGGGGAAGGTTGTGTATGTGGAAGACATAGCTGAGGGGCTTGAGAATGGACCTTCAGCATTGGTTGGCCTTTTTAGCGGTCGCAATGTTGGAAAACAAGTGCTCGTTGTTTCTCATGAGTAAAAAGCATTTGTTTCTTGTGTTCA
Gma.8074.1.S1_s_at	BE823449	At2g44520	1e-101	Metabolism			TTTACCTCCCTGTGTTTATGTCTGGGCTTTTGATTCACCGTCGTTCTGAAAACGAACAATTCTTAGAAGACAAAGCAAAGGGTTTTGTGAAATCTGCATCCTCTACGGAGTCTTCAGAGTTGGATGATGATAACGGCGATCAAAATATCAAGGCCAGGCGTCCCTATCGGACTGAAGCGCGTCCTCCCGTATCGTATGCCTCTGTTGCACCTTTTCCCTTTTTGCCTGCTCCATCATATAACTTCCCTTGATATCTGTCAGTTATACGGATTTTGTATGACTTCAACATTTTCTCGGCCAAG
Gma.8020.2.S1_at	BG789780	At1g13280	4e-58	Metabolism			GACTCAATGAGGATCCACATTTTTTTTGTTTCTTTTTTAAGGAAAAAATTCGGTTACAGTTTCTTAGGTGTTGTTCTCTAGTCAGAATTGGAGTTTTATTTCGACAATTTACGTAATAAAAGTTTTCATTAAAGGTTTATACAGATTGTCGAAGTGAGGCTTAATTTTCATAGAAGAACAGCACAAATTAAAAACTGTTTAAGTTTTCTCCTTAATTTTTATTTTTTTTAATTCTCTTCATTGTTGGCTTGGTTTGGAGACACTTGCAACAAGTTCACAATTTAACCACCTGTTACTTGTATTGAAATTTATTAATGTAGTAATTGTGGGTCAAGATGTCAGGTAGTAGTAGTAGAGTTTTTTATGTTGTTGAATAATGAAAGTGACAAGTGAGGTTGG…
Gma.6843.1.S1_at	CD402735	At2g28760	1e-179	Metabolism			TGTCCGGGAACACAAACTCGAAGTTTCTGNTATGTCTCTGACCTGGTTGATGGCCTTATCCGTCTCATGGNAGGATCAAACACCGGACCAATCAACCTTGGAAACCCAGGTGAATTTACAATGACTGAACTTGCTGAGACNGTNAAAGAGCTTATTAATCCAGGTGTGGAGATCAAGATGGTGGAGAACACTCCTGATGANCCNCGACAAAGAAAACCAGACATCACAAAAGCAAAGGAATTGTTGGGCTGGGAGCCAAAGGTCAAGTTGCGTGATGGTCTTCCTCGTATGGAAGAGGATTTCCGTCTGAGGCTTGGAGTTGGCAAAAAGAATTAACTTGTTTTTCGCTCCTTTGGTGACATGTTAAAGTAGAATAATAAGTGAGATGGGTCTGGCCCG…
Gma.6764.1.S1_at	AW394737	At3g23940	1e-119	Metabolism			GGAATGCCTGAGATGTTAACACCAACAAGTGCAATAATGGGTGCAGGTCTTGGAAAGGAAGTTGCATTATTGACTGATGGAAGATTTTCAGGAGGTTCACNNGGATTTGTGGTTGGCCATATATGTCCTGAAGCACAGGAAGGTGGTCCAATTGGCTTGATTCANAATGGAGACGTAATCAATGTTGACATCAAGAATAGGAGAATTGATGTTTTGGTATCAGATGAGGAGATGGAAGCACGCAGGAAAAAGTGGACTGCTCCTCCATACAAAGCTAACCGAGGAGCTCTGTACAAGTATATTAAAAATGTGACACCTGCTTCTAGTGGATGCGTAACAGACGAGTAGAAAGACATACCTGCAGAGCAAAAGCTGATAGTATGCCTTGGTGAAA
Gma.6917.1.S1_at	CD412438	At5g42740	1e-100	Metabolism	Sucrose Biosynthesis		TCCTCACAAGACATTCAGCGGCAATCGACCTTCTCTCAGCCTACTGCTTCCATCATTGAATGCTTATAATATTGGGCAGTTGTTGGCAATCTATGAACACAGAATTGCTGTAGAGGGTTTCATTTGGGGAATCAATTCTTTTGATCAGTGGGGAGTAGAGCTGGGGAAGTCNCTGGCTACTCAAGTCAGAAAGCAACTTAATGCATCTCGTACTAAAGGAGAACCAGTTCAGGGCTTTAATTTCAGTACTACAACAATGTTGACAAGATATCTTCAGGCAAGTTCAGATGTCCCAGCGGATCTGCCAACTGTTTTACCGAAGATCTAAGCACCTTTTTGCAGATTGTTATTTTGATGATTAAGAAGAAAATAATCTGGTCTTGTATAGCATGACCACGG…
Gma.6730.1.S1_s_at	BE211440	At2g36800	2e-72	Metabolism			GGGTGCCAATGCTTACGTGGCCACTATTTGCGGATCAGTTTTTGAATGAAAGCCTAGTGGTGCATGTACTAAAAGTTGGAGTGAAGGTTGGGGTGGAAATTCCGCTTACATGGGGTAAGGAAGTGGAAATTGGTGTGCAAGTGAAGAAGAAAGATGTTGAAAGGGCAATAGCAAAGTTGATGGATGAGACAAGCGAAAGTGAAAAAAGAAGAAAAAGGGTGAGAGAGCTTGCTGAGATGGCTAACAGAGCCGTAGAGAAAGGGGGATCCTCTTATTCTAATGTGACCTTGCTTATCCAGGATATCATGCAGAAAAACAAGAGAGATGTGTGATAAGTCCAAATTTTGTA
Gma.7120.1.S1_at	BM093481	At2g38400	1e-176	Metabolism			GAGGCCTAATGCTAGGAGTTGAACTTGTCACTGATCGTGAACTTAAAACTCCAGCAAAANNTGAAACGCTGCATGTAATGGACCAAATGAAAGAATTAGGAGTACTTATTGGTAAGGGTGGTTACTATGGAAATGTCTTCAGAATTACACCCCCGTTGTGTTTCACCAAAGAAGATGCAGACTTTGTAGCAGACGCAATGGACTTGACCTTGTCTAGAATGTGAAGCTGAGCCAAGATCCTAGCTTTAATAAAAGTCTATTATATCATAAATGAAACTGTATTATCTCATCTCCATAGCTGGTAAAAATTACATAGATGCAGACTTATATAGCTAAAATAGCAGACCAATCTACTGTGATCTTAGGCTATGCATGAGCCAACAACTCGT
Gma.7251.2.S1_a_at	AW396102	At5g03290	7e-41	Metabolism			GGTATTGCACTTGCTGAGGCTGTACATGGTTCAGCACCTGATATTGCTGGAAAGAATTTGGCTAATCCAACTGCTTTACTGCTGAGTGGTGTTACAATGTTGCGCCATTTGGACCTCCACGACAAAGCAGAACAGATTCAGAAAGCTNTCCTCANCACGATTGCAGAAGGGAAGTACCGAACAGCTGATCTCGGTGGCAGTTCAAAGACAACTGAATTCACAAAAGCAATCATTGATCATCTTTAAATTTTGGTTGGAGTCAGCAAGAAATTCTTGCTTATGATTTTNGANTTTCAGTCAATTTTCTATCTATTTCCCCAATTAATCGGAAAGAATGGGATTACCTCAGCTTAAAGGAAAACTCACCCATGTTTGTGTGACATTTTACAACCAAAGNCA…
Gma.7310.1.S1_at	BQ630696	At5g54960	1e-117	Metabolism			AAATAAATGTTTGCTTTTCCAGATTTGTATCTGGTCTCGTGTTGCTGACTTGTTGACTTGTTGTAATCATGAACTATTATTGCTTTGTAATAATGTCTTGTATAATGGAATTGTTA
Gma.7310.1.S1_s_at	BQ630696	At5g54960	1e-117	Metabolism			TTCGCTGTGGACAAAAGACCATCATCTTTCTCATCAATAATGGAGGTTATACAATTGAAGTTGAGATTCATGATGGTCCATACAATGTGATAAAGAATTGGGACTACACTCGCTTTGTGGACGCTATCCATAATGGGCAAGGCAAATGCTGGACTGCCAAGGTACGTACAGAGGATGATCTGACTGAAGCAATTGCAAAAGCTACTGGACCACAGAAAGATTCACTATGTTTTATAGAAGTTTTTGTACACAAGGATGACACCAGCAAAGAATTGCTGGAATGGGGATCTCGTGTTGCTGCTGCTAACAGTCGTCCTCCTAATCCTCAATAGAAAATCATTTCCTAATTATTGGCCTGTTTTGTGTATTTTGT
Gma.7435.1.S1_at	BU547689	At2g18560	9e-50	Metabolism			GGTTTGTATCGAGAACCCGCAAAGTGGGACTGTTGGTTCCGGAGTGGGCCCAACAGGTAACAATACTGAAGCATCGTTCTATTGGGGGTTTTCTTTCGCATTGTGGATGGGGTTCGACGCTTGAGAGCGTAACGAATGGTATTCCCTTGATCGCGTGGCCGCTGTACGCAGAGCAGAGGATGAACGCGACGTTGCTGGCGGAGGAGTTGGGNCNNGNGGTGAGGACCACGGTGTTGCCGACGAAGAAGGTTGTGCGTAGGGAAGAGATAGCGCGGATGGTGAGGGAGGTTCTTCAGGGTGATGAAAATGTGAAGAGCAATGGCATAAGGGAGAGAGTGAAAGAGGTGCAACGAAGTGCAGTGAATGCTTTGTCGGAAGGTGGTTCGTCCTATGTTGCTC…
Gma.6651.1.S1_at	BQ629334	At3g10850	7e-19	Metabolism			AAGCTGGCCAAGCAACAATTCCCTCAACCATTGAGGATGAGTTGGAGACCAATCCCTTTATGAGGGTTGATCTACCTGAGATCCAGGAGAGGGTGGGCTGCAAGTCACCTGTTGAAGCATTAGGAGAGATAAGGAAGCAGAAAGACAATTGGAGAGGCTAATGAAACTAGCATTCTCATTTGTTGATATTTCATTTTCCTTTTCTGTTTTATTCATATGAATAAGGCCTTTATGTAGATACTGTAACAATATGTTTTGCCTGAAACTTAAATGACAGAGTCAGAGGCTTGTCAANTTAGGGGCATGGGTTGTGATTGGCATTGTCGCCTATATGCATTTTATGTTGGTTTTCCAAATACTAAGATGGTCTATTTCATACATGTCATTTACTTGTGAACT…
Gma.6602.1.S1_x_at	CD415212	At3g02780	1e-121	Metabolism			TTGGGTCGCATTCTTTACAAGGCACCTTCTGATGGCAAATGGGGAGAGCATGAACTGGACTATCTGCTTTTCATTGTCCGGGATGTTAATGTGAACCCCAATCCTGATGAAGTGGCTGATATCAAATATGTGAACCGTGATCAGTTGAAGGAGCTGTTGAGGAAAGCTGATGCAGGTGAGGAAGGTCTGAAGCTATCACCTTGGTTCAGACTAGTTGTGGACAATTTCTTATTCAAATGGTGGGACCATCTTGAGCAAGGAACTCTTGGGGAGGCCACTGACATGAAGACCATTCACAAGTTGACATAAGTAAGTTCAGAGGAGCTTCCTGCATCCCTGTAATGAAGGGTGGCTGCATTCCGACC
Gma.6602.2.S1_s_at	BI320883	At3g02780	1e-94	Metabolism			AAGTATGAGTTGCTTCTTCAGCAACGATCTGCAACCAAGGTAACATTCCCTCTTGTGTGGACAAACACCTGTTGCAGCCATCCACTGTACCGTGAATCTGAGCTTATTGATGAGAATGCCCTTGGAGTAAGAAATGCAGCTCAGAGGAAGCTTTTGGATGAGCTTGGTATTGTTGCTGAAGATGTACCAGTTGATCAGTTCACCCCATTGGGTCGCATTCTTTACAAGGCACCTTCTGATGGCAAATGGGGAGAGCATGAACTGGACTATCTGCTTTTCATTGTCCGGGATGTTAACGTGAACCCCAATCCTGACGAAGTGGCTGATATCAAATATGTGA
Gma.6570.1.S1_at	AW350797	At1g30620	0	Metabolism	Galactose Metabolism		GCAAAAAGCTCATCGTAACGGTTACGGTATTTCATCTGCAATCTGAGTTTCTAGCCATTCAGCCAAGCAGTTGGCCATCAACTGCTCTTTTACATGGTGCTCAGGATTTTTTTTTTNCTTTTTCTTTTTGGTCGTCCTTAGGGAGTTTGGTAGTTGATTCGTTATACTTACATGTGTATTCAACATACAATGAGTCAATAATAATAAATAATATAATGCCCAGCCTCTGGTTGGT
Gma.6570.1.S1_s_at	AW350797	At1g30620	0	Metabolism	Galactose Metabolism		CAAAGTAGACTACCTTCCACGTCGACCCGGCGATTATGCCGAGGTGTATAGTGACCCTTCTAAGATCAACAGGGAACTGAATTGGACCGCACAATACACTGACCTTGAGAAGAGTTTGCAGGTTGCATGGAAATGGCAAAAAGCTCATCGTAACGGTTACGGTATTTCATCTGCAATCTGAGTTTCTAGCCATTCAGCCAAGCAGTTGGCCATCAACTGCTCTTTTACATGGTGCTCAGGATTTTTTTTTTNCTTTTTCTTTTTGGTCGTCCTTAGGGAGTTTGGTAGTTGATTCGTTATACTTACATGTGTATTCAACATACAATGAGTCAA
Gma.6442.2.S1_at	BM270161	At1g52760	1e-34	Metabolism			GCTCACGGAACTTCTGACGGCGTTACCTGCCCNNCNTCNNCCAAGCTGCTGTATGAGAAGGGTTCCAGTGAGGATAAGACGTTGAAGCTCTACGATGGAATGTATCACTCTTTGATTCAGGGAGAGCCCGATGAGTCTGCGAATCTCGTGTTGGGGGACATGAGAGAGTGGATTGATGAGAGGGTTCGACGGTATGGACCTAACAAAAATTCCCAGTGAAACAAACCATTACTAAATTCCTATTTTGGTTCCACATTGNNTATTTTGTGTCTATCAAAACTTTATTAAAGTTGTTATGTGAAGACGGAAGAGTATCCTTCTTCTATCATATTTGGATTTCAATCAAAAATGACATTTAATCAATCCAGTTATCGG
Gma.6540.1.S1_at	AW309284	At4g39330	4e-86	Metabolism			GTTGCCCATCTTGGAATTGCTCAAAGTCAACGGGACCTTATTTCTCGTGGGTGCACCAGACAAGCCCTTACAATTGCCNGCTTTCCCATTGATATTTGGCAAGAGATCAGTGAAAGGTGGGATCATAGGGGGAATAAAAGAGACGCAGGAAATGTTGGAGGTTTGTGCAAAGTACAATATAACGAGTGACATTGAATTAATCACACCAGACAGAATCAACGAGGCTATGGAGCGCCTTGCTAAGAATGATGTGCGCTACCGTTTCGTCATTGATATTGCTAATGCTGCCGCTTCCAACAACTAAACTAGCCTTCAATTCGGATCAAATTTTACTTGTTTCGATATTTACTGTTTAATAGACCCGTGATTTTACCTCTGCAATTGGACGAATAAGTCATA…
Gma.6545.1.S1_s_at	BQ627693	At3g09820	1e-156	Metabolism			GGATTTCTTTCACAATTGGTTAAGCATAAGCCCATTGAAGAATGCATTAGAGCTGGGTGTTATGCAGCCAATGTTATCATCCAAAGGCCTGGCTGCACATACCCACCGACGCCTGATTTTCATTGAGTGATTCCTCTTTTTCTGTTACTGCTATGAATTTTTTTCTTTTTATCATTGAGAAGGATTTTAATAGCCACACTCTAACTGGTGTGGGGTTTTTTAACCCCCCGNCTAGGGAAAACANCGTGAAAAAGTTGCAGNAANNGAGATAAAACTTGAATAAGTTCATATATTTGAAGTCCGATCA
Gma.6257.2.S1_a_at	BE658112	At5g17310	1e-58	Metabolism			GGCTATTGGGATTAATGTTCCTCGATCACGATTCCTTCCTGTGAAGGCAACTTCAGATTTGNTTCTTGTCCAGTCTGACCTCTACACTTTGGAAGACGGATTTGTCATTCGGAACAAAGCNAGGGAAAATCCTGAAAACCCTTCTATTGAACTGGGACCAGAATTTAAGAAGGTTAGCAACTTCTTGGGCCGCTTCAAGTCAATTCC
Gma.6192.1.S1_s_at	AW396773	At3g57520	1e-105	Metabolism			ATGACTCAGAGACCGGGTTGACAACCTTCTCCATTCCAGTTTCTCCAGAGGAGATGTACAGATGGTCAATAGAGATCCAAGTTTGAGTCCTTTTTAAGACTTGGTGTTTGATGCATTGTTGTATCAGGAGAAGGGTTTTGTTGTAATTAAGCATTGAGGGAATTGTTGGAGTCAGGCAGAGAGAGAGGGGGGAGGTTTGTTGTAAGACACCNTAGTATTAGTATCATGTAGTGGAGAAAAAGGGTTGTTGATCCTAATAGCTAGACAAGGCATGTTGTAGTAGTCATGGGGTGGGGAAGTCCTTTTGTTGTAGCATGTAATTTGGTTTAGACTT
Gma.6263.1.S1_at	AW311303	At1g79550	1e-173	Metabolism			AAGACATTTGGTGAAGCATTGGATANGACNCAGACCNTNATTTGGAATGGACCAATGGGTGTTTTTGAGTTTGATAAGTTTGCCACAGGAACAGAGGCNATAGCCAAGAAACTGGCAGAGCTGAGTGGGAAGGGAGTNACNACCATCATTGGAGGAGGTGACTCNGTTGCCGCTGTGGAGAAGGTTGGNCTTGCAGACAAGATGAGCCACATCTCCACTGGTGGTGGTGCCAGCTTAGAGCTTCTTGAGGGNAAGCAACTCCCTGGTGTCCTTGCNCTTGATGATGCTTGAGNAAANATCANTNGTTCCTNTGNANTTTGTGCTTTATATTATTATTATGGTTGGNTTTCAGCCAACAGTGGATTNAGGTACAATGAGAGNNGCNNNNTNTTGCTCCTG…
Gma.6080.1.S1_at	BQ611386	At2g21045	2e-40	Metabolism			GTAACCATAGATGTCCATGCTGCCAAAGATCTGCTCAATTCATCTGGTTATCGTTATCTGGATGTTAGGTCAGTTGAGGAATTCAACAAAAGCCATGTTGAGAATGCTCATAATGTCCCCTATGTCTTCATCACAGAAGCAGGACGGGTGAAAAATCCAGATTTTGTTGACCAGGTGGCAGCAATATGCAAGANTGAGGATCATTTGATTGTGGCTTGCAATAGTGGAGGAAGATCACTCCGAGCCTCCGTTGATCTGCTTGATTCAGGATTTAAGAATATTGTTAACATGGGGGGAGGCTACTCTGCGTGGGTGNNATGCTGGATTTGCCGGGAACAAGNCAGGAGAAGACCTCAAAACTAGNTGCAAGTTCCGTCCTAANATCGCAAAACCCACTGC…
Gma.6005.1.A1_at	BM188184	At5g61510	4e-48	Metabolism			GGGATCTTTGGCATGCTTGAAGCTTAGGGGCTACATGGTAAGTTTTGGGCAGTCATCTGGTTCACCTGATCCGGTTCCATTATCTTCCCTGGCNNNNNAANNNCCTTTTCTTGACTAGGCCTAGTCTAATGCAATATGTTGTCACTCGGGATGAGCTGTTGGAGGCTGCTGGAGAGGTGTTTGCTAACGTTGCTTCTGGTGTGTTGAAGGTCCGTGTTAATCATACTTACCCATTGTCTGAGGCTGCAAAAGCACACGAAGACCTGGAGAATCGAAAGACNTCAGGATCTGTTGTGTTGATACCCTAAGACTCTCAGTTGTGTATGTGTTATACACCAAGTCCTTGTTT
Gma.6037.1.S1_at	CD390794	At2g19070	1e-26	Metabolism			AAAGCCATTAGGTTATGCTGCTCAAAAGATAAGGGAAGCAGTTAACGCGGTTACGGGTGAGTATGTAAAGTCACAATTAAGTGTTGGTTTAGGGCAAGAGCAAGTGGATCACATTAGGGCTTTTTTCATGGGACAAGGACACGGTACAAAACCGGCGTATGCTAGGGATCATAACATTCTCCTCACNAGCTGGATGAACATGCCAGTGTATGAAGCTGATTTTGGTTGGGGAAAGCCTATGCAATTCACTTTAGCACATGTGTTTCAACAAGTTGATAGGGTAGGGATTTTTCCAAGCCCAGATGGAGACGGTGTTGTTGTCTACCTTAATTTCGAGACAGCACAATTGCAACTTTTGAAGAAGTTGTTCTACGCGGATATGTATGTATCCTCATTATA…
Gma.5787.1.S1_at	BQ298856	At5g66280	2e-66	Metabolism			AAGCCATGTGGCTGATGCTGCAGCAGGANAAGCCCGATGACTATGTTGTGGCCACNGAAGAGTCCCACACCGTNGAGGAGTTCTTGGAAGTCGCGTTCGGCTATGTGGGACTCAATTGGAGGGACCATGTCGTCATTGACAAGAGNTACTTTCGCCCCTCTGAAGTCGATAACCTCAAAGGGGACGCTTCCAAGGCCAAGAAGGTGCTTGGTTGGAAACCTAAAGTGGGGTTTGAGCAGCTTGTGAAGATGATGGTTGACCGGGACATTGAGATGGCTAAGAAAGAGAAGGTTCTTGTTGATGCTGGCTACATTGATGCTCAGCAACAACCTTGAATCTCATCTGCAACTTGAGGAAGAGGGGNTTTTGCTGTTTTGATCATATAATGCCGTTGACATA…
Gma.5913.1.S1_at	BM731481	At1g74920	0	Metabolism			AATGACACTGTATATGGCTTGGGTTCTGCTGTAATATCAAATGATCTAGAAAGATGTGAGCGCATTACTAAGGCTTTTAAGGCTGGAATTGTGTGGATTAATTGCTCTCAACCATGCTTCACTCAAGCCCCATGGGGAGGCATTAAACGCAGTGGTTTTGGTCGTGAATTAGGAGAATGGGGACTTGATAATTACTTGAGTGTGAAGCAAGTGACCCAATATATCTCTGATGAACCGTGGGGCTGGTACCAGTCTCCTTCAAGGCTGTGATAGGTATCCAAAAGCTAACATTAATAAGTTGTGGGTAATATCAAATTACGATTATGACCCCAAAGTCGAGAAGA
Gma.5803.1.S1_a_at	BU084390	At5g03630	1e-114	Metabolism			GGTCTTTCTGGAAGGTGGAACTCCTGAAGANAACCAGGCTATTGCTAAAGTTGCTAAGGTCCAGCCTCCGGTTGCGGATGTAAATCAACTTGCTAAGGAAGGCCTTTCCTTTGCTAGTAAAATATAATGG
Gma.5803.1.S1_at	BU084390	At5g03630	1e-114	Metabolism			GAAGGCCATCAAGGCAGCTGAGGAAGGAANAACAGTTGAGGAGTATGATTACCTTCCATACTTCTATTCCCGTTCATTNGATCTGTCTTGGCAATTCTATGGCGACAATGTCGGCGACACAGTNCTATTCGGAGACAACAATCCTGCGTCNTCAAAGCCNAAGTTTGGGACATACTGGATTAAAGANGGGAAAGTTGTNGGGGTCTTTCTGGAAGGTGGAACTCCTGAAGANAACCAGGCTATTGCTAAAGTTGCTAAGGTCCAGCCTCCGGTTGCGGATGTAAATCAACTTGCTAAGGAAGGCCTTTCCTTTGCTAGTAAAATATAATGGTTTTATTTGGGAAGGATAAAGATGCTTGGTGGTTTGCATAGATTGTATCTGACAGGCTTTATTTTACT…
Gma.5803.2.S1_at	BU761097	At3g09940	9e-15	Metabolism			CGAGCGGCACGAGATACTGGATTAAAGATGGGAAAGTTGTTGGGGTCTTTCTGGAAGGTGGAACTCCTGAAGAGAACCAGGCTATTGCTAAAGTTGNTAAGGTCCAGCCTCCGGTTGCAGATGTAGATCAACTTGCTAAGGAAGGCCTTTCCTTTGCTAGTAAAATATAATGGTTTTAATAGGGAAGGATAAAAATGCTTGGTGGTTTGCATAGAAGATTGTATCTGATCTGGCTTTATTTTACTCTGAATTATGCATTACAGAAACTTTATTTTGTGTTTTTCGTTTGATGTGGTTGCACGGGATATATATATATATATTGCCGTATCTATTTCATTTCTCTGGCCACTTGTTGGGTTCTGTTTACGATTTCCAGACTTATAAACGCATCTATTTGCA…
Gma.5819.1.S1_at	BF219559	At2g17630	3e-47	Metabolism			GAGATCTTTGATGAATGTGCCTTTCACTTTGGAGAAATCAGAGCTGGAGGGTGAGTTTATCAAGGAGGCTGCTAAAGAGAAGATGGTGCAGCTCAAGGGACATAGATCAGTGGGAGGTATGAGGGCTTCTATTTACAATGCCATGCCCTTGGCTGGGGTTGAGAAGTTGGTGGCTTTCATGAAGGATTTTCAGGCAAGGCATGCCTAAAGGAGTAACCTCAATCTGAAACAAATACTTGCATTGCATAAACCTAATGCCTAAAGGATTTTATGCTAATAAAGTGTTTGTCTGGTATTCAGAAAGGGTCACAATCTCTTGTCAGTTTTTTGCTTTCTTTAGTTAGGTATCTTTGCTGTCTCTTTTTGTTTACTTTCTTGTTCCATGTTTGATATTCAAAT…
Gma.540.1.S1_s_at	AW598718	At2g26670	2e-96	Metabolism			ATGCTGAATTCAGAAACACTGGATTGGAAAGGTCTGCAAGTTTGGTAGAAGATTTGGATTGGTTCAAGGAGCAAGGTTATACCATTCCTGAACCTTCATCTCCTGGTCTTACCTATGCACAATATCTTAAGGAGTTATCTGTGAAGGATCCTCAAGCATTCATTTGCCACTTTTACAACATCTACTTTGCTCATTCAGCTGGTGGTCGAATGATTGGGAAAAA
Gma.5503.1.S1_at	CD405755	At3g15730	1e-104	Metabolism	Phospholipid Biosynthesis		GTGCCAGAGATTCTGAGATTGCCATGGGTGCTTATCAACCATTTCATTTGGCTGCCAGGCAGCCTGCCAGGGGACAGATCCATGGTTTCCGCATGTCGTTGTGGTATGAGCACCTTGGCTTGCTTCATGACTCTTTCCTCCACCCTGAAAATGAAGAATGTATTAAGAAGGTGAACCAAATTGCTGACAAGTATTGGGATATCTATTCAAGTGAGTCACTTGAGCATGACCTTCCTGGTCACCTGCTCCGATATCCTATTGGGGTTTCCAACGAAGGAGTTGTCACTGAGCTTCCAGGATTTGAATTCTTCCCTGACACCAAGGCTCGTGTTCTTGGCGACAAAGTTGATTACCTTCCACCGATCCTTACTACTTAAGTTTCATTTTATAAGCTTGTTA…
Gma.5478.1.S1_at	AW350606	At4g34135	1e-132	Metabolism			CAAGTGCTAATTCTGGACCATCAAGCTGTGGGAGCCTTTGTCACACACTGTGGATGGAATTCCACGCTCGAAGCAGTGTCGGCGGGGGTCCCCATGCTCACCTGGCCCGTCTCTGCAGAGCAATTCTACAATGAAAAGTTTGTGACCGATATACTTCAAATCGGGGTCCCTGTTGGTGTTAAAAAATGGAATAGAATTGTGGGGGACAACATAACCAGTAACGCGCTTCAGAAGGCACTCCATCGTATAATGATAGGGGAAGAAGCAGAGCCTATGAGAAACAGAGCACACAAACTGGCGCAAATGGCAACAACGGCGCTCCAACACAATGGATCATCTTACTGCCACTTCACTCATTTGATACAACACCTTCGCTCCATTGCAAGCCTTCAAAATTAA…
Gma.5590.1.S1_a_at	BE822176	At1g22410	1e-130	Metabolism			GTTACCACACACACTGTGACCCAAGGCTCAATGCTTCACAATCTCTTGAGCTTGCTTTCATCATCGCNGAGCGTTTGAGAAAGAGCAGGATCAGATCGCAGCAACCTCTTGCCCCTCTAGGAGT
Gma.5578.1.S1_x_at	BE659192	At2g40890	0	Metabolism	Cytochrome P450	CYP98A	GAAGCAATGAGGCTTCACCCACCAACCCCACTAATGCTCCCACACCGTGCCAATGCCAATGTCAAAGTTGGAGGCTATGANATTCCNAAAGGGTCCAATGTGCATGTGAATGTGTGGGCNGTGGCCCGNGACCCGGCNGTGTGGAAGGATCCNTTGGAGTTCCGACCCGANAGGTTCCTTGAGGAGGATGTNGACATGAAGGGCCATGACTTTAGGCTACTTCCATTCGGGNCGGGTCGNCGNGTATGCCCGGGTGCCCAACTTGGTATCAACTTGGNANCATCCATGTTGGGCCACCTCTTGCACCATTTNTGTTGGACCCCACCTGAAGGAATGAAGCCTGAGGAAATTGACATGGGAGAGAATCCAGGGCTAGTCACATACATGAGGACTCCAATA…
Gma.5578.3.S1_at	AW310572	At2g40890	9e-24	Metabolism	Cytochrome P450	CYP98A	GAAAATTGCCTTGTGTCTATGTAACTACATTTGAAATGGCAATTCAAGGAACTAAGGAAAAACCCATAGCGAGTTTGGCTTCTCCTCTTCAGATTTTGGATTGAAATTCCTGTTTAAGATTAATT
Gma.5510.1.S1_at	AF135485.1	At5g06900	4e-96	Metabolism	Cytochrome P450	CYP93D	GTGGCTTGGTAGTTATTCCCGTCCATTTCTCTAATGCTGCCTAATAATTTAAAG
Gma.5510.1.S1_s_at	AF135485.1	At5g06900	4e-96	Metabolism	Cytochrome P450	CYP93D	CACATGGGCCATTGGTAGGGATCCAAATTACTGGGATGACGCACTCGAGTACAAGCCGGAGAGGTTCTTGTTCTCCGACGACCCGGGCAAGAGCAAGATTGACGTGAGGGGGCAGTACTATCAGCTCCTGCCCTTTGGGAGCGGGAGAAGAAGCTGCCCCGGAGCCTCGCTAGCGTTGCTTGTCATGCAAGCAACGCTAGCGAGTTTGATCCAGTGCTTCGACTGGATCGTTAATGATGGTAAAAACCATCATGTTGACATGTCTGAGGAAGGGAGGGTGACTGTGTTTTTGGCCAAGCCACTCAAGTGCAAGCCTGTTCCGCGTTTCACTCCGTTCGCTGCCTGAAGACTGTGAATGGAATGGTTTCTCTAGTTGTGTGTGCTTTACCTACTCTATAT…
Gma.5513.1.S1_s_at	AW310453	At5g02230	1e-111	Metabolism			CTTGCTGTGGAGACATCTGTGACTGCTTAGATCATTGATGAACAAAAAAATAAAATAAAAAAANTAAGAAAAAGAGAGAGAAAGAGAGAAGTCCTTTGTGAATTTCCCGAGTTGGGATGTAGTAATTGTATGTAGTTGATGTAGATGCTTTGATCATATTACAATTAT
Gma.5529.1.S1_at	AW432588	At1g59950	7e-95	Metabolism			TAAGTCAAATCAGCCAGAGCCGTTTGATCAGCGGACCCACCAAACCACAACTCGCTGATCTCTGGGATGATCAAATATAAACTATTTACTACTATGCAGCTCCCACTCTATTTTTATAATCCATCTTTTTACCTCTTGTTTCATTTTACGTTTAAATAATTCATGCCATGCCACTTCTTATTTTAGATTTCACAATCAATAAACTAGGCACGCGCGGCACATGATATGAA
Gma.5609.1.S1_at	CA935501	At3g53620	1e-91	Metabolism			ATAAACATTCTGATTTCCGTGCCGTTCTGTTATGGCACTACTGCTGCCTCGGTTCTTGACACAACAGTGTCAAAAACTTTCTGCTTTGGGATGCGGCTGTACTGCTACTCAATAATGAGTTCATTTCTAGTATTGAAGAGNNNNTCCTTTGTTTGGTATTGGAGAAATNGTAACACATGAATNAANTTTCAGTTAAGCAAATTCCTCGAGTTTTATTGTAT
Gma.5611.1.S1_at	AW309826	At4g37360	1e-110	Metabolism	Cytochrome P450	CYP81D	TACCACACGTGGCTTCAGAAGACATCAATATCGAAGGATTCAATGTTCCACGAGACACAATTGTGATTATTAATGGTTGGGCCATGCAAAGAGATCCTAAGATATGGAAAGATGCGACAAGCTTTAAACCTGAGAGGTTTGATGAAGAAGGAGAGGAGAAGAAGTTGGTAGCATTTGGTATGGGAAGAAGGGCTTGCCCAGGAGAACCCATGGCTATGCAAAGTGTTAGCTATACTTTGGGATTAATGATTCAATGTTTTGACTGGAAACGAGTAAGTGAGAAGAAGCTTGATATGACAGAGAATAATTGGATCACCTTGTCAAGGTTAATTCCATTGGAGGCTATGTGTAAAGCCCGCCCACTCGCCAGCAAAGTTGGAAGTTATTAACAATATTTTA…
Gma.5618.1.S1_at	BU549496	At2g05710	0	Metabolism			TGGGTATTGTTCCTCTTTGCTTTAAATCTGGTGAGGATGCTGACACATTGGGATTGACTGGTCACGAACGTTATACTATTGACCTCCCAAGTAACATCAGCGAGATAAGGCCTGGCCAAGATGTCACNGTAACAACNANTACNGGAAAATCTTTCACCTGCACAGTTCGCTTCGANACNGAGGTGGAACTTGCTTACTTTAACNATGGGGGCATTCTTCCNTATGTCATCAGGAACCTCATTAAGCAGTGAAGTCATGGCTGATGGGAAATGTTAAACNATGTTGCCACTGCGTGTACACGTTTTGAGTGGTNNNAATANAATGTGAGAGAAATGAGAATAAATTCAATAAATAGGAAAGATCCCTTCTTAAGAAGGCAATTTTTTGACANTTCCAGGT…
Gma.5674.1.S1_a_at	CA937173	At3g58610	1e-117	Metabolism	Amino Acid Biosynthesis/Metabolism		AATCCTTTCATGCATGCTCGTGGTGTTTCTTTCATGGTTGATAACTGTTCAACCACAGCTAGGTTGGGTTCGAGGAAATGGGCTCCACGATTTGACTACATCCTAACCCAGCAGGCCATGGTGGCTGTGGACAATGGAACTCCTGTTAACAGGGACTTAATCAGCAACTTCCTGTCAGACCCAGTGCACGGAGCCATTAAAGTTTGCGCTGAACTGAGACCCACAGTAGACATTTCTGTGCCACCAGATGCAGACTTTGTTCGTCCGGAGTTGCGTTCTAGCAATTAGAACTTAAAAGCAATTATGGCTTTCACTTCGAATCTTTTTCAGATTTCTCAGAACTGCAGTTATCTTGTTAGTTTGGGTTTTCATGATTGGATGCTAGTGTGTAAGTTGTAT…
Gma.4529.1.S1_at	BI967748	At1g12000	1e-129	Metabolism			AACTGCACTCACCTCAATGATGGATGTGGAGAGGAGGCATGGTAAATTCAAGCCCGTGATCAAGAAAGCAATGGTGGAGCTTGAAGGGGCACCCTTCAAAAAGTTTGCCTCCTTGCGTGATGAATGGGCCCTGAAGAATTGCTACATCAGTCCAGGTCCAATTCAATTCTCTGGCCCAGGATCTGAAGTAATTAATCACACTCTACTCTTGGAGCTTGAAGCACAAGCTTAGGCATAATATGAGGTCCTTGTTTTGACGGTGGCAATTCATATTGTTTTTTGGGATCTTTCAATATATATTTGATCTGTTACTGTCTAGTGTTTGAGTTTACTTGTGAAATTAATCAGTTAATGATTCTTGAGTTGGTTGATGAGTATGAATTGGTCAACTCAAAAGTT…
Gma.4624.1.S1_s_at	CF921137	At2g43900	0.0003	Metabolism			GAACTCAAGTCAAGCGTTACCAAGAACAATGATTTTGAACCGAGACCAAGTGCTACCAAATATGATGATTTTGAACTCAGGTCAAGCGTTACCGAGAATGATGATTTTGAACCGAGACCAAATATTAGCAAGTATGATGACTTTGAACTCAGGTCAAGCGTTACCGAGAATGATGATTTTGAATCGAGACCAAGTGTTACCAAATATGATGATTTAGAACTCAAATCAAGCATTACCAAAAACGATGATTTTGAACCGAGACCAAATATTAGCAAGTATGATGACTTTGCATCCAGGTCAAATACCAAGTACGATTCTGAACCTAAAGCAAGTGCTACCAAGTATAGTGATTAAATGAAAATCAAGTAATTGTATAATACAGTCGAAGAAAATCGTGCT…
Gma.4589.2.S1_at	BI943736	At1g76490	1e-165	Metabolism			TGTTGTGTGTTATCCTCTTGTTTAAGGCTACTGCTTCAATAATGTGGTACTTTAGAGGGTAGTGTTTTTACGTGTTGTAATCTCCATCTTGTTGATTTGTAATTGTAGCAAGAGATGTCTCCAATTAGGATGTAGAGTTGTTAATAATAACAGTCTCTGGTTGCTCA
Gma.4512.2.S1_at	CD409073	At2g30540	2e-38	Metabolism			ATATTTAGAAGATCACAGGGTGCTTGATCAGTGGTGTATCAGGATGGACAAGGTGACGAGGTTGGCTTCTGAAAAGGGTGTGGTGATTTTCACAAAGAGNTCTTGTTGCCTCTGCTATGCAGTNAACATTCTGTTTCAAGAACTTGGNGTGAATCCTGTGGTTCATGAGATTGATCATGACCCTGAAGGCAGAGAAATGGAGAAAGCTCTATTGAGGCNAGGCTGCACTGCTCCAGTNCCAGCTGTNTTCATAGGAGGGAAGCTAANGGGATCCACCAATGAAATCATGTCCCTCCACCTAAGTGGTTCACTCACTCAGATGCTGAAACCTTANCAGGCTTTGTCTTGAAAAGAAGCAC
Gma.4839.1.A1_at	AW310019	At5g57850	6e-09	Metabolism			TCATCGTCTGGGATGATCAACCCATTGGCAATGGAAGGGTGGGAGAATTAACAATGTTACTTTCGGATATGCTTTGGGATGATATGGTAGCTGGCCCTGGCACACAGAGGATACCTGTTCCTTATGTTGAGTAAACCTACAAAGTCATCAAATTACAGGCTGGGAACAACTTTCTTACTTTTCTATGTCATGTTCNTAGGAGTTCTCCTTGCAAAGATTTATCAAGAGGTTTCTCTTTGTATTTGCTTTTTGTATTTCNAAGTGTGAACACTGAACAAGTCCTTAAGTGAAGCACCAGGTGTTTCCTGCAACACAAAATTNACGTAGCAGATAAATAGTCCTTGAACTGTTTCACGTTGTTG
Gma.4839.2.S1_at	BI974385	At5g57850	2e-58	Metabolism			TCTCTTCATCATCCGAGTTGCTTGAAAAGCTTCATGAAAAATGGAGTTCAGTGGAGAAACCACCATACCCAGCTATGTATTCTAGTATTTATGGAGGTATCATACTTGATCCAGCAATGATGGTAATCCCCATTGATGATCACATGGTTCACAGAGGGCATGGTGTGTTTGATACAGCTATTGTTCTAGATGGATACCTCTATGAGTTGGATGTTCACCTTGACAGATTCCTAAGTTCAGCCTCCAAAGCAAAGATATCCTCTCCCTTTTCTCGATCAGTGCTTCACAGCATTCTAATACAACTAACTGCAGCATCAAAATGCAAGAAGGGAACTCTAAGATACTGGCTCAGTGCAGGTCCTGGAGATTTCTTGCTATCATCAGCAGGATGTCCAACAT…
Gma.5046.1.S1_s_at	L43921.1	At3g12120	1e-147	Metabolism			TTATGGAATCCTGAACAAGGTCTTCCATAATATTACAGACACTCATGTAGCNCATCACTTGTTCTCCACAATGCCACATTATCATGCAATGGAGGCNACAAAGGCAATAAANCCCATNTTGGGAGAGTATTATCGGTTTGATGNGACTCCATTTGTCAAGGCAATGTGGAGAGAGGCAAGAGAGTGTATTTATGTGGAGCCAGATCAAAGTACNNAGAGCAAAGGTGTATTTTGGTACAACAATAAGTTGTGATGATTAATGTAGCCGNGGNCTTCTTNNNNNNNNNNNNNNNNNNNNTGAACTTTCCNTTGTGACTGTTTAGTATCATGNTTGCTTATTGGGAATAATTTTGTTGAACCCTGATGTTGGTAGTAAGTATCTA
Gma.4902.1.S1_at	CD398435	At3g15730	0	Metabolism	Phospholipid Biosynthesis		ATGGGTGCTTATCAGCCCTATCATTTGGCTACCAGGCAGCCNGCACGTGGNCAGATNCANGGTTTCCGCATGTCATTGTGGTATGAGCACCTTGGCATGCTTCATGACTCCTTCCTCCAGCCAGAAAGTGANGAATGCATTAANAAGGTGAACCAAGTTGCTGACAAATATTGGGATCTGTATTCTAACGAGTCACTTGAGCATGACCTTCCCGGTCACCTTCTCCGCTACCCCATCGGGGTTGCCAGTGAAGGAGATGTCACCGAGCTGCCAGGATTTGAATTCTTNCCCGACACCAAGGCTCGCATTCTTGGTGGCAAAGCTGACTACCTCCCCCCTATTCTCACTACTTAATTTGATTTTGTACTTTGTTACAAACTTGTTATTGCTTACATCCTA…
Gma.5150.4.S1_a_at	BM887549	At1g64440	9e-35	Metabolism	Galactose Metabolism		GAAGAGTTCCCTCTGTCAGCAATGAACCCATATGGACGAACTAAGCTTATCATTGAAGAAATTTGTCGTGATGTCCACCGTGCAGAGCCAGATTGGAAAATAATATTGTTTTTATACTTCAACCCAGTCGGTGCACACCGTAGTCCGTAGGTCTTGTGAATTTAGTTT
Gma.5129.1.S1_at	CF920232	At5g22140	1e-125	Metabolism			ACAAGGGATGTATGCAAGTGCTCATGCTCAAGTGGTTGCCAAGAACCTGAAGCTATTGATAGAGGGAGGAGGCAAAGAGCGTAAGTTGGGAACATACAAGGCACAGCCACCAATATCTATAGTTTCACTTGGAAGGAAAATAGCTGTTGCACAGTTCCCATTCATGACTGTGCTTGGAAGGCTTCCTGGCATGATCAAGTCAGGGGATTTGTTTGTTGGGAAAACCAGAAAGGAATTAGGACTCGAACCTAATGTTAAAAAATCTTAAATTTGGTATATTGAGTGAGTGTTGTGGTGTGTAATTGTGTATATACACTTCTTCAACTCTTTTTCTTCCTTGTCATTGTTGTGCATGTGTAAGTTGATTGTATGTGTTTACTTTCCTATTGTAT
Gma.3557.2.S1_s_at	BI974043	At1g59960	2e-20	Metabolism			ACCACCTTAGTCTCTGAAGTCACTCTCCCCTCCTCCTCCGGCCAGCGGAAGATGCCGCTGATGGGCCTCGGCACCGCGCCGGAAGCAACCAGCGCGGTTACCACAAAAGATGCTGTTCTTGAGGCCATCAAGCAGGGCTACAGGCACTTTGATGCTGCTTCTGCTTATGGTGTGGAACAGTCTGTGGGAGAAGCCATAGCTGAAGCACTTAAGCAAGGACTAATTGCATCCAGAGATCAACTCTTCATCACTACCAAATTGTGGGTCACTGATAACCATGCCCATACTA
Gma.358.1.S1_at	AW310270	At3g48690	1e-65	Metabolism			AATTGGATCGGAACCTGTTGCAGGGCACCAACAGAGCGTGCCCTATTTGGTATGGGATTTTGTTTATCCATCTGCGCCTGGAGGGATTGACAACCCTATGATCAATCCAATGGTTACTGGGGCGCCTAGCTTGGCTGGACTTGGGTGTTCTAAGATTCTGGTTTGCGTTGCTGAAAAGGATCTGATAAAGGATAGAGGGGTTGCGTACTATGAGGCTGTGAAGAAGAGTGGCTGGCAAGGTGAAGCGGAACTGTTCGAAGTGGAGGGCGAGGATCATGCTTTCCACATCCACAATCCACAAACCCAGAATGCCATGAAAATGATCAAACGCCTCTCGGATTTTCTCCTCCACTAAAACACATACCCTGAGGATTCTGAGTTTTAATGTCTCATGGATGT…
Gma.3643.1.S1_at	CA936445	At1g43710	0	Metabolism			AATGCTCTTGCCAGGGATGTGGAATACCTTGCTTCTAGGGATGCCACNATCATGGGTAGTCGGAATGGCCATGCTCCCATATTCCTNTGGTATACCTTGAATCGGAAAGGATATAGAGGTTTTCAGAAAGAAGTACAGAAATGCTTGCGAAATGCNCACTACTTCAAAGGCCGCCTTGTTGAGGCTGGGATTGGTGCAATGCTTAATGAACTGAGCAGCACGGTTGTGTTTGAGAGGCCACATGATGAGGAATTTATACGCAAGTGGCAGTTAGCATGCAAGGGGAATATCGCACATGTGGTGGTGATGCCAAACATCACTATTGAGAAGCTTGATGATTTTCTGAACGAGCTTCTGGAGAAGCGTGCTACCTGGTTTCAAGATGGCAAGGATCAACCC…
Gma.3956.1.S1_x_at	BE659401	At3g43190	0	Metabolism	Sucrose Biosynthesis		GGCAAATTTACTCGGACAGGCTCTTGACACTCACTGGTGTGTATGGCTTCTGGAAGCACGTGACCAATCTTGAACGCCGTGAGAGCAAACGTTACCTCGAGATGTTCTATGCTCTCAAGTACCGCAAATTGGCTGAGTCTGTGCCCCTTGCTATTGAAGAGTAAATTCATGTTTGAAGAGAACATCAATGGAGAAACCGGCTTTTGGTCGTTTGAAGTCTTATGGAGCTTTCATAAATAACGCCATTGATTTTGATTGTGATCAGCTTTTGGATTTAAAGAGTCTAAAAAAAAGTGTCGTTTGTTTTTATATTTTGCTTAGGTTTTGGGTAAAAAAAGTAAAAAAAGAAAGTCTTTTTTTTTTNNNNAAATTCTTTTTGTTGTTGCAATATTGTGTATG…
Gma.4096.1.S1_at	BG508949	At4g14880	1e-121	Metabolism			GAAAGTCCAATACTGTCTGGAGGAAAACCTGGCCCTCATAAGATCCAAGGAATTGGTGCTGGCTTCATCCCTGGTGTTCTGGATGTCGATTTACTTGATGAAGTTGTTCAAATTTCAAGTGAAGAAGCCATTGAAACTGCTAAACTTCTTGCTTTGAAAGAAGGTTTGCTGGTGGGAATATCATCTGGTGCAGCTGCAGCTGCTGCAATTAAGATAGCAAAGAGGCCAGAAAATGCTGGAAAACTCATTATTGCGGTCTTCCCAAGCTTTGGAGAGCGTTATTTATCATCTGTGCTCTTTGAATCCGTGAAGCGAGAAGCAGAGAGCATGGTCTTCGAGCCTTGAATA
Gma.4097.1.S1_at	AW350249	At1g77120	1e-179	Metabolism			GATTAACAAGGCTTTTGATTACATGCTGAAAGGGGAGTCCATCAGATGCATCATTCG
Gma.4030.1.S1_at	CD414923	At3g14680	6e-92	Metabolism	Cytochrome P450	CYP72A	AATTTATTTTGCTCGAGCGATCAAGAATGATGTGAAACTTGGAAACCTTTCCCTACCTGCGGGAGTGCAAGTTTCCTTACCAATACTATTGATTCACCAGGATCGTGATATTTGGGGTGATGATGCTACAGAGTTCAACCCAGAAAGATTTGCTGAAGGAGTAGCAAAGGCAACAAAAGGCCAAGTTGTGTTTTTCCCATTTGGATGGGGTCCTAGAGTGTGCTTAGGCCAAAATTTTGCTTTATTAGAAGCGAAGTTGGTTTTGTCATTACTCTTACAACGCTTCTCATTTGAGCTTTCTCCTACCTATGCACATGCTCCAGTCACTGTGCTCACTCTTAATCCAAAATTTGGTGCTCATATCATCTTACA
Gma.3838.1.S1_at	AW099128	At4g15940	5e-86	Metabolism			CGGCAAAAGGGCTCAACCAAGGACATGATNTTTAAGATCCCATTTCTNATTAGCTACNTNAGCTCTGTCATGACATTGTTTGAAGGNGATGTCATACTAACTGGTACTCCCCCGGGTGTTGGCCCTGTNAAAGAGGGTCAAACAATTACTGCTGGNNTTACAGGCCTTGTGGACGTACAGTTTAATGTTGAAAAAAGAGCTAGGCCTGTTCTTTCTTGATAAAACCCTCCTCGAAGGTACTACAGTTCTACAGAAAATATCTTGCCAAAAGGAAACCAGGGGACACAATAAAAATTCAGTTATATGGACTTNAGAGTCTANNCGATATTTAACAGTTTNTTTTTTTGTAATGGTCGTCGAATCCGTACTATAGATCTTTTGGAGTGCTATTTTAGACTT…
Gma.3881.1.S1_at	X92437.1	At2g30490	0	Metabolism	Cytochrome P450	CYP73A	CGACGCAAAGCTTGGGGGCTATGATATCCCAGCTGAGAGCAAGATCTTGGTGAATGCATGGTGGCTGGCCAACAACCCTGCACACTGGAAGAAGCCAGAGGAGTTCCGGCCTGAGAGGTTCTTCGAGGAGGAGTCGCTTGTTGAAGCCAATGGCAATGACTTTAGGTACCTTCCCTTTGGTGTTGGCAGAAGAAGCTGCCCTGGAATCATTCTTGCA
Gma.3881.1.S1_s_at	X92437.1	At2g30490	0	Metabolism	Cytochrome P450	CYP73A	TTAGACTCCACCACATGATCATGATCATATGATCAATCCCCTTAATTTTTTCTTTTTTCTTTTCCCTTTTCTTTACTCTGTATTGTATCAATGCTTGAAAATGGGGTTGTTCCAAAAATGTCATATATATTTGGCCTGCTAATGGGTATTGTAAATCTCTGAACTTGAAGTGATGCACGGTTTTGAGATGGTTTTCTAAT
Gma.3881.2.S1_at	AW349366	At2g30490	6e-82	Metabolism	Cytochrome P450	CYP73A	TGCGAAGCTTGGTGGCTATGACATCCCAGCAGAGAGCAAGATATTGGTGAATGCATGGTGGCTGGCCAACAACCCTGCACACTGGAAGAAGCCAGAGGAGTTCCGGCCAGAGAGGTTCTTGGAGGAGGAATTGCATGTGGAAGCCAATGGCAATGACTTTAGGTACCTTCCCTTTGGGGTTGGCAGAAGGAGTTGCCCCGGAATCATTCTTGCA
Gma.4425.1.S1_a_at	BQ297572	At5g01410	1e-139	Metabolism			AGCCATGGTTGGTATCAATTTGACCGATGACAAGGTTGAGAGGTTCGCCAATCGCTCTGAATGAA
Gma.4375.1.S1_s_at	AF363021.1	At5g37600	3e-40	Metabolism			ACGAAACCGCTGACATCAACACCTTCTTATGGGGAGTTGCAAACCGTGGAGCTTCAGTTAGGGTTGGGAGGGACACAGAGAAAGTAGGGAAGGGATATTTTGAGGACAGAAGGCCAGCTTCTAACATGGACCCATATTTGGTTACTTCCATGATTGCAGACACAACCATTCTGTGGAAGCCATGAGCAAAA
Gma.4375.2.S1_at	BQ080891	At5g37600	2e-95	Metabolism			GATCAAAACCGCCATTGAGAAGTTGGGGAAGAGACACAAGGAGCACATTGCTGCTTATGGAGAAGGCAACGAGCGTCGTTTGACAGGGCGCCACGAAACCGCTGACATCAACACCTTCTTATGGGGAGTTGCAAACCGTGGAGCTTCAGTTAGGGTTGGGAGGGACACAGAGAAAGCAGGGAAGGGATATTTTGAGGACAGAAGGCCAGCTTCTAACATGGACCCATATGTGGTTACTTCCATGATTGCAGACACAACCATTCTGTGGAAGCCATGAGCAAAACTTGCATGTTGTCTCCCTTTGGATGGAACAAGGAACAAGGAACAAGGAACAAGGAACAGTTATGCTTTTCTAAGTAGGGTTTGGTCCTTTTTATTTTTTACCTTTTGATTTTTCTA…
Gma.4206.1.S1_s_at	AF195798.1	At4g15350	2e-74	Metabolism	Cytochrome P450	CYP705A	CGTCCCGAGAGGTTCTTAGAAACTGGTGCTGAAGGGGAAGCAGGGCCTCTTGATCTTAGGGGCCAGCATTTCCAACTCCTCCCATTTGGGTCTGGGAGGAGAATGTGCCCTGGTGTCAATTTGGCTACTTCAGGAATGGCAACACTTCTTGCATCTCTTATCCAATGCTTTGACCTGCAAGTGCTGGGCCCTCAAGGACAAATATTGAAAGGTGATGATGCCAAAGTTAGCATGGAAGAGAGAGCTGGCCTCACAGTTCCAAGGGCACATAGTCTCGTTTGTGTTCCACTTGCAAGGATCGGCGTTGCATCTAAACTCCTTTCTTAATTAAGATAATCATCATATACAATAGTAGTGTCTTGCCATCGCAGTTGCTTTTTATGTATTCATAATCATCAT…
Gma.4108.1.S1_a_at	BI701465	At4g32520	7e-60	Metabolism	Amino Acid Biosynthesis/Metabolism		GCGATTAATTGAGCATGGATATAAACTGGTTTCTGGNNGNNGTGACAATCACCTGGTTCTTGTCGATCTAAGGCCATCTGGTCTTGATGGTG
Gma.4279.1.S1_at	CA935007	At4g38690	1e-142	Metabolism	Phospholipid Biosynthesis		TTTGAATCACTTGAGCGAGCACCCTCCCGTTACGTCGCGCAAATACTTCTACAGGATCGAGAACACCGTTACCCCCGTCGCGGATAACCCCGTTCTCTGTGTTAAACCTGTTACCCGACGCATTCATGGCTACGCCAGGCTCTTCATCGCTCAATGCTTCGCCAAAGGATTCGCTGATAGGCTTCAGGTCTTCTCCACGGATTTCATTGACGAGGATTTCGTTGACGCATGCGCTGGACTCACTCATGCAAGGGTCGAAGGGAAAGCCTGAATGCCCGAATTCAACTATTAATATTGTTTGTTAGGGATGGATGTTTTGCTTTGTGTGTTCCTTTGATCTTTGATGGTGTCGTCACTGTACTTTTTTTATTTATTTGTTGTAAAGCTGTATAGATTTTA…
Gma.4230.1.S1_at	BE820796	At4g25050	2e-28	Metabolism	Fatty Acid Biosynthesis		ATTGCAGCCCAGAGGGCGTCGGTTTCAGCTTAGATGTGCGGCAAAACCAGAGACAGTGAAGAAGGTGTGTGACATAGTCAAGAAGCAATTGGCACTGCCAGATGAATCAGCTGTTACTGGAGAGTCTAAATTTGCTGCGCTTGGAGCTGATTCTCTTGACACGGTTGAGATTGTGATGGGACTTGAGGAGGAATTTGGTATTACCGTGGAAGAAGAAAGTGCCCAGAGTATCACCACCGTTCAAGACGCTGCTGATATGATCGATAAGCTTCTTGAAACCAAGGCTTAAACTAGTAAAAAGGACAAGCATGTCCATTTTAGAGTTTTTTGCTATGTCGACGGAAGGGGTTTTTAATCTTTATCTTTGGTATTACAACTTGATTGTCTAAGTAACTGCTA…
Gma.4125.1.S1_at	BM567768	At3g58580	1e-122	Metabolism			TTTAGCAGTTGACCCGCTTAACATTCTACGTCCTCACAGCAAGTTGGTTCATCAGTTACCACTGGTNAGTGCATACNCATCTTTTGCNAGAACAGTTGGCCTTGGATATGAGCAGCATAAAAGGAGANTGGATGGTGGAACNAATGAACCTTTATTCACAAATGTCACTAGAGATTTTATTGGCACTCTAGATTACATATTTTACACAGCGGATTCATTGGTTGTGGAGTCATTATTGGAGTTNCTGGATGAGGAGAGTTTGAGGAAGGACACAGCACTTCCTTCACCTGAATGGTCCTCAGATCACATNGCTCTCTTAGCNGANTTTCGCTGCTGCAAGAATAAATCTAGGCGTTGACAGTTAAGGTCACTTTCAGTGATACATAANNAAAAANNNNN…
Gma.4182.1.S1_s_at	CF920322	At5g28050	2e-63	Metabolism			GATGGGGGTCCCTTTGGTGCTATTATAGTNNTGTAATGATGAAATNNGTTGCTNGATGTCACAACATGGTTCTGAGGAACACAGACCCNACTGCTCATGCAGAAGTCACTGTNATAAGAAAGGCTTGTGAAAAGNTAAACCAGATAGAACTTTCAGACTGTGAAATATATGCTTCTTGTGAACCTTGCCCNATGTGCTTTGGAGCAATNCACCTCTCACGAGTTAAGAGGTTGGTTTATGGAGCAAAGGCAGAGGCAGCAATTGCTATTGGNTTCGATGACTTCATTTCAGATGCATTGCGAGGNACTGGATTCTANCAGAANGNCACAATTGGAGATTAAAAGGGCTGATGGCAAAGNNGCNAACATTGCTGAAGAAGTTTTTGAGAGAACNAANGGA…
Gma.2387.2.A1_at	AW309516	At2g44160	2e-11	Metabolism			TGGTCAAGAGGATGCATCACCCTCAGGGTACAAGCTACTTCTTGGTGAGTTTGGTCGACAATGATTACATCAATGGTGATCTTTTCACCGTCTTTGCAGATTTCTGACATGAGCTTATTATTTATTAGTTCTTTAGTTATGTCACTTCTGTTCGTTGTCATGTTCCTTTCCTTTCTTTTGTTTTCTTCTCAGTAGGATGGTTCATATTACACGTGGTTCTAAGTTGAAGTACCAAATTATTTTTCTGGGCTTTGTCCCAAACATCTTTATTTTTTCATTCTTCTGAGTCGCATGAGTAACCTGT
Gma.2434.1.S1_a_at	AW348548	At3g02770	1e-46	Metabolism			GAATATCTATCTCTCATTCTCTCGTGCCTCAACGCTTTTTTAACTCCTTTCGCTTTTCCATTCCAACCTCTTTCACACTTCAGATCTGTTTCTTCATCGGTTGTTCAAGTAAATGGCCTTNGTCACCACTGCTGAAGTGTGTGATGCGAACCCNCAGTTAATTTTGAGTGGGGAGCTTCGTGCCCTTCAGCCAGTTTTTCAGATTTANGGNCGTCGACAGGTNTTCTCTGGACCTATAGTTACCTTGAAGGTGTTTGAAGACAATGTTTTGGTTCGTGAGTTCCTTGAAGAGAAAGGCAATGGAAGAGTNCTNGTTGTTGATGGAGGCGCGAGTTTAC
Gma.2434.2.S1_at	AW310370	At5g16450	2e-36	Metabolism			GATTTCAATTCATGCAAGGACTATATTTATGGGCAGCACAGGATCTAGTGTAGTGCTTTCGGTACTTGTGTTCTTGACCCGGTTCCTCGCTTCCACAAAATTATAACCGATAGAATCCCCTTGATAATCAAAGTAGGTTGGAGTGTTTGTCCATTTCATACCAACATTATCTCTGTTTTGAATTACTGTCACGAAAGCTTGTTTTTCCCCCATATATTAAGTTAATGGTTGTCTGTTATTAAGTTTGGAGAGATATAAGTCATAAGTGCAAAGTATACACATCCATATTTTGACCAGATGATCTTATTGTAGTTGCATAAGATGTTGCGGTCTAGA
Gma.2439.1.S1_at	BI972053	At1g03210	7e-41	Metabolism			GAATAAGATGGTCAGGTCAGTGCTTTAGTTTGCAGGCCCNGCGTNTGGTNTCATCAGTTCAAATCAATGCCAAAT
Gma.2308.1.S1_s_at	AF022462.1	At4g15350	6e-75	Metabolism	Cytochrome P450	CYP705A	GACAGACCATCGGAGTTCCGTCCTGAGAGGTTCCTAGAGACAGGGGCTGAAGGGGAAGCAGGGCCTCTTGATCTTAGGGGACAACATTTTCAACTTCTCCCATTTGGGTCTGGGAGGAGAATGTGCCCTGGAGTCAATCTGGCTACTTCGGGAATGGCAACACTTCTTGCATCTCTTATTCAGTGCTTCGACTTGCAAGTGCTGGGTCCACAAGGACAGATATTGAAGGGTGGTGACGCCAAAGTTAGCATGGAAGAGAGAGCCGGCCTCACTGTTCCAAGGGCACATAGTCTTGTCTGTGTTCCACTTGCAAGGATCGGCGTTGCATCTAAACTCCTTTCTTAATTAAGATCATCGTCATCATCATCATATGTAATATTTACTTTTTGTGTGTTGATA…
Gma.2311.1.S1_at	AF141602.1	At3g01120	1e-167	Metabolism	Amino Acid Biosynthesis/Metabolism	Methionine Biosynthesis	TGAAGCGGGTCTACTATCCAGGCTTGCCGAGTCANCCTGAACATGAGCTTGCCAAGAGGCAGATGACTGGTTTCGGTGGTGTTGTCAGTTTTGAGATTGATGGAGATCTACATACCACAATAAANTTTATTGATTCANTTGAAAATCCCNTATATTGCGGCCTCGTTTGGTGGCTGTGAGAGCATTGTGGATCAACCTGCTATTTTGTCTTACTGGGATCTTCCTCAGTCAGAAAGGGCCAAGTANAAGATTTATGACAACCTGGTTCGCTTCAGCTTTGGAGTTGAAGATTTTGAGGATTTGAAGGCTGATGTCCTGCAAGCTCTGGAAGCTATATAGACAGTTTTCCTGATTCACCCANGTTTTTTTNCTTTTANTAATNGTGNTATNTGTTNNTNN…
Gma.2313.1.S1_at	AF452454.1	At3g22890	0	Metabolism			GATGGAAGGTGCTGGTTGATTACTATGATAGCTTAGTACTCTCAAGCAACGGCAAAGTGCAGGAAGCTGTTCCAGCTTAATCTTGTATCATATCATAATGTATATATCTCATGATTGGGAGAAACCTTAAGCTTATGTATTCTCCTGCTAAGACATACTTCACGAGGATCCTCTGGCCCAATCTAATAATAATAATAAATTAAAACTTTGGGGAGGCACAAGCACGGACACATTG
Gma.2313.1.S1_s_at	AF452454.1	At3g22890	0	Metabolism			AGCGTCTAAACATTCTTCCTTTCAGGGTTGCTGCATATGACAAGACTCAGGGTAAAATGGCATTCTTTGACCCTTCAAGGCCTCAGGACTTCCTGTTCATATCAGGCACAAAGATGCGCACACTGGCAAGGAACAAAGAAAGTCCTCCTGATGGATTTATGTGCCCTGGTGGATGGAAGGTGCTGGTTGATTACTATGATAGCTTAGTACTCTCAAGCAACGGCAAAGTGCAGGAAGCTGTTCCAGCTTAATCTTGTATCATATCATAATGTATATATCTCATGATTGGGAGAAACCTTAAGCTTATGTATTCTCCTGCTAAGACATACTTCACGAGGATCCTCTGGCCCAATCTAATAATAATAATAAATTAAAACTTTGGGGAGGCACAAGCACGGA…
Gma.2281.1.S1_at	BI317540	At1g54580	9e-27	Metabolism			GAGTCTCGAGTGTTTTAGTTGTGAACTCTGTTGNNNCGTGATTAAANCAAGTCTGAGAAGAAAAACAAATTAGTCCAACCTTTTGTTTGTTTCTGGAAGTTAGTTATATNAAGTTGTGTTTTTGCNTTAANGGGTTTTTGTCAATGATATGNTAATTTTAATAGATGTAGATTTATGTCAATGATATTGTATGTTAATTTTATTCAGTCTCGTATCTAGCTGAATAATTAAGAATTATACTACGTCATGCCTATAACACTTGAGGTGCTTAAA
Gma.2750.1.S1_at	AW349237	At4g33510	0	Metabolism	Amino Acid Biosynthesis/Metabolism		TCTGGACTTAAAACCCGCTCTTTTGATGCAATAAGGGCTGAGCTGAGGGCATTCTTTGATGTGCATGATCAAGAAGGAAGCTACCCAGGAGGGGTTCATTTAGAGATGACAGGGCAGAACGTGACAGAATGTGTTGGAGGCTCAAGGACTATTACTTATGATGACTTGAGCTCACGCTACCACACACATTGTGATCCAAGGCTTAATGCTTCTCAATCTCTCGAGCTTGCATTTAATATTGCGGACAGGTTGCGCAAGAGAAGGCTCAATTCAACTCGATCACTTGGAATTTAGACAAGAGGGGGTCTGTCTTCCTTTGTACCTGGATCACAATACTGGTCAAACATGTGTTGAGTTTTCTTGAGCACAGTGAACAAATACTCTACTGGGAGCCACTCT…
Gma.2635.1.A1_at	BE659549	At1g08250	8e-57	Metabolism			TCCTTTCAAGACGAGCATTGTTTTCGCACACGACAAAGGAACTTCGGTGCTTTTCAAAGTGCTTTC
Gma.2635.1.A1_s_at	BE659549	At1g08250	8e-57	Metabolism			GAACCGTCCGATTAGGCTGGTGGATGACGCGAACGTTGGAACCGCGAAGCACTTTGAGTACTTGTTCTACGTTGATTTTGAGGCTTCCATGGCTGAGGTTAGGGCACAGAACGCGTTGGCAGAGGTGCAGGAATTCACGTCTTTCTTGCGAGTGTTAGGGAGTTACCCTATGGACATGACACCCTGGACACCTT
Gma.3082.2.S1_a_at	CD404827	At2g42910	4e-49	Metabolism			TCTGGTCATCATGTAGTCATTGTTGATGATTTGGTCCAATCTGGAGGCACCCTGATTGAGTGTCAGAAAGTTTTGGCAGCCAATGGTGCAGCAAAGGTGAGTGCCTATGTTACCCATGGCGTGTTTCCTAACCAATCATGGGAGCGATTCACTCATAAAAAAGACGCCTTGGAGAATGCATTTGCCTACTTCTGGATTACAGATTCTTGCCCTCTTACTGTCAAAGCTGTAGCAAATACAGCTCCTTTTGAAGTGCTGAGTCTAGCCGGGTCTATTGCTAATGC
Gma.3168.1.S1_at	CA819733	At5g54500	7e-92	Metabolism			TGAAAGGTGGAAGTCCATATGGTGCNGGAACTTANGCCGGTGANGGCTCAAGACAGCCAAGTGAGCTNGAGTTACANCAAGCATTCCACCAAGGNAAGTACATTGCNGGCATCACAAAGAAGCTCAAGCAAGCTGCATAATGTTNGCCTTNCNTNNATATNAGATNATACTATTATTATTAAACCATACCACAATATTGCTTGAAAATCATTNNCNANTTTTTAGNCTTGAAATATATTGAGTTTTNTTTTNCTGNGCTTGCAAGTATTTTTTTTTTNCTTTNCTAATCTTNGTNAAGGAAATGCTTTGTANGAGTGTTACATGTTGCAGTGGATGTTGCAATTTGTTGAATGAGGAAAGTTTGTGNNTNTNGTCCTTTNGTGTTANGCNGAAACANTA…
Gma.2854.2.S1_a_at	D86930.1	At2g26230	1e-118	Metabolism			AGCACTTCCTGATACCCGTGAAAGGATGGTAGCAACAGAAGTAACCGCACTGTGGAGGTATTCGTATGAATCGCTGTATAGCCTCCCTCAGAAGCCGCTTTACTTTACAGAAAAGTATCAGGAAGTGAAAAAAGTTCTGGCTGACACTTTTTTTGGCCCACCAAAAGGGGGAGTCTATAGCCCATCTGTTCAAAACACACTCTACCTGATGGCAAAGGCCACACTGAACAGNTTTCCTGACATAGCTTATGTCAGTCTAAAGTTGCCAAATCTTCATTTCATACCTGTCAATATCTCAAACCAGGATGGCCCTATTGTGAAGTTTGAGGATGATGTGTACTTGCCAACGGATGAGCCACATGGGTCAATTCAAGCTAGTTTGAGCCGCCTTTGGTCAAA…
Gma.2876.1.S1_s_at	CD396422	At5g43330	1e-167	Metabolism			GCCTAAATTAGACACCATTGCTTTTTGTCTACTGTCCTTGTTAGTAGGTTCCCATGTTTTGCCTATAGAAGTGTAGCTTCAATTTTGAATAATGCTCCTTCTAAGATACAAAGGAACTATCACTGGAGAAGAGTCTGTTTTTCATTGGAATTACTTGTATTTCAACATCTAATCCTTTTAGGAGGAGGATATTTGAGCCCATGGGCCGCATATTGAATTTTGGATTAGTCCTAATTTTATGTGCGTTAGTGCCCCCGGTTGAANNNNNNNNNGTGTTTGTGGTGGNTGTACAAGATTTTTGATGTATGTGGGATGCACAAAGCGTGCAAACATATACTTCTAGGCCTTGTGGTCGAGTATTATG
Gma.2891.1.S1_at	BI971321	At1g23820	1e-140	Metabolism			TGTCGCCAAATATTCAAAGGTTCTGTCAACTATGCATGGACCACAGTTCCTACATATCCTAGTGGGATGATTGGTTTTATGCTTTGCTCAACTGAGGGTCCTCTTGTTGATTTCAAGCATCCAGTGAATCCTTTAAGTGAGAATGATAGTCAACAGTCAAGACCATTGAAATTTTACAATTCTGAGATTCATACAGCGGCTTTCTGTTTGCCATCTTTTGCTAAGAGGAAGATTGGTTCTAAAACAAATTGAAAATATTTTTCCTGGGATTGAAGGAGCAAATGTGGCTGTAGGCATTCATCCTTTCACTGGATTGGTCCATCCATCAATGAACCTTGGAATAAGTTAATATCTTCAAGATGACATTGAAGAGCAACTTTACTTCTATTTCATGAAATG…
Gma.3190.1.S1_at	CD396812	At1g65290	1e-42	Metabolism	Fatty Acid Biosynthesis		CAGAATGACCTTGGATTGGATAGTTTAGATTCNGTAGAGATNGTGATGGCTCTTGAGGANGAGTTTGGGTTCGAGATTCCTGATAATGAGGCAGACAAGATCAACTCCATTAAACTTGCAGTGGACTTCATTGCATCTCATCCTCAGGCAAAGTAGTGGAATTCNNNNNNNNNNNNNNTTTTGTTTCTCAACATCTAGTTTAGATGANNCATCNGACATTTTTGCTTCCANAGTGGAACTTTGTTTTCTCATCCCTCAGAAGNGTGTTAGCTGGGGATGTGCCAGCTTCATTTGGCGGTATTGGCATCCAGAACTTCACATTCTGTGTTCCTCCTATATTCGTGTCAATAAGAATTGTGTTAAATTTCCGATTATGAAATTGTGAGGTCTTGAGTTGTC…
Gma.3046.1.S1_at	BQ741319	At4g12110	2e-89	Metabolism	Lipid Biosynthesis/Metabolism		GTGGTTTCAGAATGCGTTGCCTGTTGACTNTTTNGGAACCNACCAAAATTCTTGTAGACATATATATATATATATATATCTGCTGTGGCAAAATAGATGTCTTTGGTTAGCTTCAGGGTGGAGATTAGTAGAATGGAGCTTTACAATTTGTGGTTTTGTGTTGGAAGAGGAGGGGGGCACGGGAGGAATTTCTTCTGTTGTCATGTTCTGGAATTCAAACATTTTGGTTTTGGTTCATGTCTGTCAGAATGTTCCTTCTCCTATGGATTGTAAATTCAGAATCTTCTATTGTCATGTTCTGGAATTCAAACATTTTGGTTTGGGTTCATGTCTGCCAGAATGTTCCTTCCCCAGTGGGTTGTAAACTCAGAAATATGTAATAGGCTTCCTCGGCTGGGA…
Gma.3508.1.S1_s_at	BI968765	At3g13750	0	Metabolism			ATCATGCATTGCCTGGCCAAAAACAAAGATTTATATAAGAGAATTTGGATGCGCAAAGACTGTGTATACTGTACATAGTCAAGTCAGGCTATTGTGCTGAATATTGCCCCATGTATTACAGGGCTTGTATCAATGAAGATTGAGCCCTTACACATTTATTTAATTTACTATGATACAATGGAAAGAATTGTAGACACGCAAAATGTGTCGGAGAGTATATTTGCTATATTCTGCCAGAAATAATTGTGTTTTCCCATTATAATTATT
Gma.3518.1.S1_at	AF301590.1	At5g37600	0	Metabolism			TCAAAGCAGCAATTGACAAGTTGGGGAAGAAGCACAAGGAGCACATTGCTGCTTATGGAGAAGGCAACGAACGTCGTTTGACAGGACGCCACGAAACCGCTGACATCAACACCTTCTTATGGGGAGTTGCAAACCGTGGAGCTTCTGTTAGGGTTGGGAGAGACACAGAGAAAGCAGGGAAGGGATATTTTGAGGACAGAAGGCCAGCTTCCAACATGGACCCATACGTGGTTACTTCCATGATTGCAGACACAACCATTCTGTGGAAGCCATGAGCAAAACCTGCATGTTTTCTCCCTTTGGATGGAAAGGAACAGTTATGCTTTTCTTAGTAGGATTTGGTCTCTCTCTCTTTTTACCTTTTGATTGGTACTATGGTT
Gma.1917.1.S1_s_at	AF243365.1	At1g78380	4e-82	Metabolism			ATGAGTTCGTTGTGGAGATAAGAAAGAAGTTAGTCATCGAGTAGGTTTCATGTTGGATCTTAATAGCCATAGTGAAGTATTGGTCGTTCTTGACCTTTCAACTAAATAATATTTGTGTAATAAAAAGGCATTTGGATGTGCCAAA
Gma.1928.3.S1_a_at	BI426837	At5g26667	8e-94	Metabolism			GTGGCAATGACAAATTTCTTATTGATGGTTTTCCCCGCAATGAGGAAAACCGGGCAGCATTTGAGAAAGTGACAGGAATAGAGCCAGCATTTGTCTTATTTTTTGATTGCCCTGAGGAAGAGATGGAGAGGCGACTTCTTAGTAGGAACCAGGGTAGAGAAGATGACAATATTGAAACAATAAGGAAGCGGTTTAAGGTTTTCTTGGAGTCTAGTCTTCCCGTGATTAATTATTATGATGCAAAGGGAAAAGTTCGCAAGATTGATGCTGCAAGACCTATCGAAGAGGTATTTGAGACAGTCAAAGCAATTTTTGGTCCAAAGAATGACAAGGCTGATTGAGCATGTTCATCTTGACTCCATGGTGGAAATTTAGAGGTCATATCAGTATTGGTGGCTT…
Gma.2019.1.S1_at	U26457.1	At1g55020	0	Metabolism			CCAAGTTCGAGACCCTTATTGACATTTCAGTGATAGAGATATTGTCAAGGCATGCTTCTGATGAGGTCTACCTTGGCCAAAGGGATAATCCAAATTGGACTACGGATTCAAAGGCATTGGAAGCTTTCAAAAAGTTTGGAAACAAACTGGCAGAAATTGAGGGAAAAATCACACAGAGGAACAATGATCCAAGTCTGAAAAGCCGACATGGGCCAGTTCAGCTTCCATACACATTGCTCCATCGTTCAAGTGAGGAAGGGATGAGTTTCAAAGGAATTCCCAACAGTATCTCCATCTAAAATGTGTGTGTGGTTTGCTTATCTATTGTG
Gma.2069.1.S1_at	CD414638	At2g38670	1e-134	Metabolism			TGCTCGAAAGCCCAAAAGATATTACTACTGCCACAGTAGCCCAAAGGATAATGGCTAATCATGAAGCTTATGTGAAACGCAATGCTAAGAAAACTAGGAGTGAGCAGAGATACTANGAAGAGAAAAAATACGTCTCTGGAGACTAGAGTGTATATAATGATCTTTTACATTAGTTNGGTACTGCTCTTCAAGNTTGACCCTGTCACAGAGATGCNACCNNTATAGTATNNNNNGAATCTANACACNCTTTGTGAAGGACATNTNGTNCAGGGTATGTATAACATAGGAGTGGNNATAACTCNGGAATACCGATGTACTTTAATGTCCTGANGTTTTANTTNTGTNNTCTGAAAGGCAACCATGTGGTTTGCTCACCAGTTTTATGCCATTTGGTTTTTG…
Gma.2105.1.S1_at	BI424905	At5g37600	1e-162	Metabolism			AGAAGGCCATTGAAAAGCTTGGATTGAGGCACAAGGAGCACATNGCAGCATATGGAGAAGGCAACGAGAGACGTCTCACNGGAAGACATGAAACTGCAGACATCAACACCTTCTCTTGGGGTGTGGCAAACCGTGGAAGCTCCATTAGAGTTGGAAGAGACACAGAGAAAAATGGCAAAGGTTACTTNGAGGACAGAAGGCCTGCTTCTAATATGGATCCNTATGTAGTCACCTCCATGATCGCAGAGACTACCATCCTCTGGAAACCATGAAAANACAGTCATATNGTCTCTAGATTTGGACCACTNAAAATTGTGTNNNNNATAGTCATTTGATCTAAAANTTTATATTTGCAAGGTGNTGTTTAGTTAGGAATTTCTAAGTGGTCTTTTTGAGCCT…
Gma.2183.1.S1_at	CD402949	At1g08630	1e-155	Metabolism			GAAAGCTAGACTTTTGGCTGATGGATTAAAAGAAGTTAAAGGACTGAGAGTGGATGCTGGTTCTGTGGAGACCAATATGGTATTTATTGACATTGAAGAGGGTACAAAGACTAGGGCAGAAAAGATATGCAAGTACATGGAAGAACGTGGTATCCTTGTGATGCAAGAGAGTTCATCAAGAATGAGAGTTGTTCTCCACCACCAAATATCAGCAAGTGATGTGCAATATGCATTGTCGTGCTTTCAGCAAGCTCTAGCTGTCAAGGGAGTACAAAATGAAATGGGCAACTAGTGGAAGAATTTGAATATGGCACGTTGCTGCCATATTAGTCATTAAAAAGGAATTCCGTGTTCCATTTGCCTTTGCTCATTTGATTTTCTTAAATGTACCCTAAAGAA…
Gma.2211.1.S1_at	AI442877	At3g53520	1e-162	Metabolism			GTTTACCATGTTAGAGCTTGCTCAGGTTGTNAAAGAAACAATTGATTCAAGTGCTACAATAGAATACAAACCAAATACTGCTGATGATCCACACATGAGGAAGCCAGATATTAGCAAAGCNAAGGAACTGCTGAACTGGGAGCCAAAAATCCCNCTGAGAGAAGGGTTGCCTCTNATGGTTAATGATTTCCGAAATCGNATTCTGAATGAANACGAAGGAAAAGGGATGAAATAAGCATAATAGCAAACCCTGTATGTATATGGAGATGAGCNTGTCTCCTTCATTTTTTNGTTCTNATTTGCGGTCAGCATCAACAGAAAAATTCTGGNAACACGTCANNNNNNNNNNNAGATATANCTACTGCTGGCCTTTTNACATTTAATCATTTATGCTTGCTT…
Gma.2110.1.S1_x_at	BU548865	At3g53620	1e-105	Metabolism			GAACAAGGAAGTTGCAGTGAACGACTTTCTTCCTGCCTCAGCTGCCTATGAAGCGATCAAGCATTCCATGACCTTATATGCGGAATACGTTGTGGAGAACTTGAGGCGGTAGTGTTGATTCCTGGGTGCTTGGAATTTTGTTTGGTTGTGAAGACATACATTACATGTATTCAAAGGCTGCTATTATAATTACGATTATGACGATAACAAAAGCTTTCTATCCTTGTCGCGTGTGCATTGGTCTCAGGGCTGCAACATGCATATTCTACACATGTGCTTAGTTTTGAGT
Gma.2113.1.S1_at	BM519739	At3g25140	0	Metabolism			TACTACGCAACAACAAAGCCACTGGANAAGTCATGGCATGTTCTGGGACTTGGCTATAACCCAAGCATCAGCATGGATGAGATTAACAATGCAGCAGTNGTGCACTTCAATGGCAANATGAAACCATGGCTNGACATTGCAATGNCTCAGTTCAAGCCACTTTGGACAAAGTATGTTGACTATGAATTAGATTTCGTTCAGGCCTGCAATTTTGGTATCTAAATGGTCAAGTTTCTTCTCACATGGTGATGCTGTGTTAGGTGCCACAGCAGTTTATTTGCTGTTTAGTTTTGATACATAATGCTTATACGTTTAACAGAGTTCCTAGCTGGTGCNAGGAAAAAATCTTGCTTCTTTCAATTGTAAAATAATACTTTAGTANAGNTATTCTCNNATGTC…
Gma.2139.1.S1_s_at	CF922475	At1g31812	2e-12	Metabolism			ATCCAACAAGCAGATCAATCTCTCTCTCTGTCTCCCAATCAAAACAGACATGGGTTTGAAGGAGGATTTTGAGCAGTATGCTGAGAAAGCAAAGACTTTGCCACCGACTCAATCAAACGAAGACTTGCTTATCCTTTATGGATTGTACAANCAGGCCACCGTTGGACCTGTCAACACCAGCCGTCNNGGNANTGTTCAACATGAGGGACAGAGCTAAATGGGATGCATGGAAGGCTGTTGAAGGGAAATCCAAGGACGAAGCAATGNGTGATTACATCANTAAGGTGAAACAGCTGCTGGAAGCAGNCNGGCNTGCCTGCTTGATAACATTGTCATGCCTTGCTTTCTNATTCTGTGCTAGNANGTTCNCAACAGTTTGGAAATAAACAATTGCAGTGT…
Gma.2139.2.S1_s_at	AW350419	At3g59480	1e-156	Metabolism	Sucrose Biosynthesis		GTCATTGTGGCACCCCAATTTGAAGTTGCTCCTTGTCACTCTTGGGGAACATGGTTCCAGATACTACACCAAGAGTTTCAAAGGATCGGTAGATGCTTTCCATGTCAATACAGTTGATACAACTGGTGCCGGTGATTCCTTTGTTGGTGCTTTATTGGCCAAGATTGTCGATGATCAGTCCATACTTGAAGATGAACCAAGGTTAAGAGAAGTACTAAAGTTTGCAAATGCATGTGGAGCTATTACAACTACCCAAAAGGGAGCAATTCCGGCCCTTCCCAAAGAGGAGGCTGCACTGAAACTGATCAAAGGGGGGTCATAGAATCTTTTGGCAAAATGCAAAAGTGCTAGCATGATTTCGTTTTCTTCCCCTAATGTTTAAATTTTCCGTTGGATTTG…
Gma.2141.1.S1_at	CD406772	At2g36790	3e-28	Metabolism			ACGTGGCCTCTGTTTGCGGAGCATTTTTTCAACGAGAAGCTGGTGGTGGATGTGTTGAAGATTGGGGTGCCGGTGGGGGCGAAAGAGTGGAGGAACTGGAACGAGTTTGGGAGTGAGGTGGTGAAACGGGAGGAGATTGGAAACGCGATTGCTTCGTTGATGAGTGAGGAAGAAGAAGATGGAGGAATGAGGAAGAGAGCCAAGGAGCTAAGCGTTGCGGCGAAGAGTGCTATAAAGGTTGGTGGATCTTCGCACAACAACATGAAGGAATTGATTCGGGAGCTCAAGGAGATCAAGCTTTCCAAGGAGGCTCAAGAGACCGCACCCAATCCTTAAGACTGGTTCTGCTTTTCCATCTTTTGAACAAG
Gma.2144.1.S1_a_at	BE821591	At4g11010	2e-93	Metabolism	Nucleotide Biosynthesis/Metabolism		TATCACGACCTGAAAGAAAGACCCTTCTTCGATGGGCTGTGTGATTTCCTTAGCTCTGGCCCTGTTATTGCAATGGTGTGGGAAGGACAGGGAGTTATTTCCTATGGCCGAAAGCTAATTGGAGCCACAGATCCTCAGAAATCAGAACCTGGAACCATTAGGGGTGATCTTGCTGTTGTTGTTGGAAGAAATATCATTCATGGGAGTGATGGTCCTGAGACTGCCAAGGATGAGATTAAGTTGTGGTTTAAGCCAGAGGAGTTGGTTAGTTTCACTAGCAATGCAGAAAAGTGGGTTTATGGTGTCAACTGATTCTTTCCCTCATGCCTTGGGTTTTCTATAACAACTGCTCAGTG
Gma.17599.1.S1_at	BI699318	At1g23800	0	Metabolism			GGCAACAAGGGCTTCTACATTCAACCTACAGTCTTCTCAAATGTTAAGGATGGCATGCTGATTGCAAGGGATGAGATCTTTGGTCCAGTCCAATCCATATTAAAATTCAAGGATCTTGGTGAGGTAGTTCAAAGAGCAAATAACACACGTTACGGGCTTGCGGCCGGAGTGTTCACAACGAACATGGACACTGCCTACACTTTGACGCGGGCACTGAGAGTTGGAACAGTNTGGATAAACTGCTTTGACACATTTGATGCT
Gma.17594.1.A1_at	AW310993	At1g64660	3e-16	Metabolism			TGAGCTTGGGCTACTACGAGACCCTCATGTCCTGCTCCGGCAGCAGCACCAGCAGTGAACTCAGCACTGAGGAGAAGGAGCTCGCCGGAATCTCGCCGGGGCTCGTGAGGATGTCGATTGGGTACATTGGAACCTTGGAGCAGAAGTGGAGCCAGCTCCAAAAGGCGCTCACTAGACTAAACGACTCTGGATACAACAAGATCGCTTGAATTGCTTTTCTCATCATGCACATGCACATGCACCCTCGTCTTCTTCCTGCTCCCTTAATGTTATGTTATCTAT
Gma.17686.1.S1_at	BF597378	At2g45550	1e-108	Metabolism	Cytochrome P450	CYP76C	ATTTACACCTGAAAGATTCCTGGAAAGTGACATTGATTTTAAAGGCCATGATTTTGAGCTAATACCCTTTGGAGCTGGAAGAAGGATTTGTCCTGGGTTGCCATTAGCATCTAGAACTCTGCATGTTGTGTTGGCATCTCTTCTATACAACTATGATTGGAAGCTCACGGATGGACAAAAGCCAGAAGACATGGATGTATCTGAGAAATATGGAATTACCTTGCATAAGGCACAACCTCTACTAGTTATTCCCATCCAAGCAT
Gma.17702.1.S1_at	CD414209	At3g14680	1e-67	Metabolism	Cytochrome P450	CYP72A	AAGCTTTCCTACTTGCCATTTGGATGGGGTCCTCGACTCTGCATAGGACAAAACTTTGGCTTGTTAGAAGCAAAAGTAGCTGTGTCAATGATCCTGCAACGTTTCTCCCTCCATTTTTCCCCCTCCTATGCTCATGCCCCCTCCTTTATTATCACTCTTCAGCCTGAGCGTGGGGCTCATCTCATTTTACGCAAACTCTAGAATGCACTTTTTAGTCTAAATAAGGCTTCTTCATTTGAGGCGTGTTTGCAATTTTAGTTTTCCTATTCCTGCTAGTTTCTTATGTAGACGATAGATCNGAACCTTCACTTCAAATCTATTTCCAAGATCAATATATACCTGTTTNGCCTAAGTTACTGGTGTAATTACTCCTCCT
Gma.17702.2.S1_a_at	AW831290	At3g14680	4e-32	Metabolism	Cytochrome P450	CYP72A	GGCTAGGGAGGAGGTTTTCCAAGTGTTCGGGAATGAAAAGCCAGATTATGAAAGGATTGGTCAACTGAAAATTGTAAGTAACATAATTAATTAATTAATGGCTTGATTCATTTCAGTTCACCCTAATCATCGTCCTACACTACAGGTGTCGATGATTCTACAGGAGAGTCTCAGATTATACCCACCAGTGGTTATGTTCGCTCGGTATCTTCGTAAAGATACAAAACTTGGAGAGCTTACAATTCCCGCAGGAGTGGAGCTTGTTGTACCTGTGTC
Gma.17610.1.S1_at	U50075.1	At1g55020	0	Metabolism			CTATCTAAGGGCTCTATGGTTGCTGAAGTACTGTCCCTGGCT
Gma.17610.1.S1_x_at	U50075.1	At1g55020	0	Metabolism			TGACTACTGGACTTCTGATGCCGGGCCATTAGAGGCCTTTAAGAGGTTTGGAAAGAATCTTGAAGAGATTGAAAAGAAGCTTATAGAGAAGAACAATNATGAGACATTGAGAAACCGCTATGGGCCGGCTAAAATGCCTTACACTTTGCTCTATCCTTCTAGTGAGGAGGGATTGACTTTCAGAGGAATTCCCAACAGTATCTCTATCTAAGGGCTCTATGGTTGCTGAAGTACTGTCCCTGGCTTTAAATA
Gma.17610.2.S1_s_at	AW348397	At1g55020	0	Metabolism			TATCTAAGGACCCTATGGTTGCTTAAGTACTGTTCCTGGTTTTAAATAAATGTGAAATTGAAGGAACCAGATTCCTTAATCAGTTGTGT
Gma.17774.1.S1_at	CA935572	At3g02360	3e-05	Metabolism			CAAGTAGTGCGTTAATCCAAGTAGTTGATTTCCGTTGCTTTTATAATTATGTTGTCAAATTGGGCACCCAGTTGTTAGAGGCACTGGTTTCTCCTTTTTGATGTTTTGATACATTTTTGTTTGGTTTAATTCGTCTTATGTTATTAGCTGAAAACAATGCTGTTACTGCGTTTGCGAATCAACATGATCTCTTATATGCAA
Gma.1738.1.S1_at	AW278755	At2g39770	1e-170	Metabolism	Colanic Acid Biosynthesis		GGTCCTGGCTGCGTTATTGAGCAAGGTGTTAGACTCAAAAGCTGCACAATAATGCGTGGAGTCCGAGTTAAGAAGCATGCTTGTGTATCCAGCAGTATTGTTGGGTGGCATTCAACTGTTGGGCAATGGGCTCGAGTGGATAATATGACCATCCTTGGAGAAGATGTCCATGTATGTGATGAAATTTACAGCAATGGTGGTGTTGTTTTGCCGCACAAGGAGATCAAGTCAAATATTCTGAAGCCGGAGATTGTCATGTGAGTGAGGTCAATGATGTTCAAATTGGTACCATGTGGTGAGGAGGTAGAAAAATTATTGAGTCTGGAATATGTTTGTCCGTTTCATTTGGTTTTCCTTTTTACTTCATGGCATTTCTTTCCTTTCTATAAGTCAGTTTTT…
Gma.1535.1.S1_at	L01628.1	At2g22780	1e-152	Metabolism			GAGTACCTGACTGGTCGCATACAAAACGGTGGAACTGAAGTTGTTGAGGCCAAAGCTGGAGCTGGTTCTGCAACACTATCAATGGCATATGCTGCTGTTAAATTTGCAGATGCATGCCTTCATGCCCTGAGAGGAGATGCTGGCATCATTGAATGTGCATATGTTGCTTCACAGGTGACTGAACTCCCATTCTTTGCATCAAAAGTACGACTTGGCCGAGTTGGGGTGGAGGAAATTCTTCCTCTTGGTCCCCTGAATGATTATGAGAGGGAGAGTTTGGAAAAGGCCAAGAAAGAGTTAGCAGCAAGCATTGAGAAGGGCATTTCTTTCATCAGAAAATGAGTAGTTGATGATAGTACGTCCCGAAAATAAATGGTTAGATTGTGCTGTGTCCATTGT…
Gma.15059.1.S1_at	BG725838	At2g39420	1e-39	Metabolism			GAGAACAGCCTACGAACTTCTGAGGGTCAGTACAGAAATTGAGCAAAGTCTGCATGAGGTTTCACTACCCTTTATAGTTTTACATGGTGAGGAAGATCAAGTGACTGATAAAGCAGTTAGCAAACAACTATATGATGAGGCGGCAAGCTCAGATAAGACNNTAAAGTCGTATCCAGAAATGTGGCACGGTCTATTGTATGGAGAGCCACCACAAAATTTGCAGATTGTATTCTCCGATATTATTGGTTGGATAGNCCAGAAATCTCGCTATGGAANTACACGATTGGAGAGAGAGCTAAAAGAAGAACACGAACATTTGTTCAAGTCTGATCTCTAGCCAAAGAAATTTGTCTTTCTTGGAGGTCTTTGGANAACAAGTGTGCACGACATCGNCTGCTA…
Gma.15392.1.A1_at	CD416483	At4g17770	1e-36	Metabolism	Trehalose Biosynthesis		AATGCAAAGGCAACCCTATCTCCAGTTGCTGAAGTGTTTCCATGCACTGTTGGCCAGAAACCTAGCAAGGCAAAGTATTATTTGGAAGACACAAGTGAGATTTTGAGAATGTTGCAAGGCCTTGCCAATGCTTCTGAGCACTCTACTAGAACTTCTTNNNAACCAGCTTCTCATTAAGGTTCTTTTTAATGTGTAGAGTGCAAACACACACACACACAATTTGGCTACAATGTAGTACTATTTTTCTATACTATACTGGGATATCTATCTTGTGTTAGATTTCGTGATCTATTTTATTTTCTGGCTGACTTGCCTTCATTTATTGATATCCCAACTATGTTGCAACTATCAATAGGTTGTTTTGAAAGTAGATGAATTACATGGGGTACTGTATTTATT…
Gma.1546.1.S1_a_at	AW348242	At1g62660	1e-108	Metabolism			GCAAGCAAATCGTTGGCAGCGCTGTTCCAGTACTTAAAGATGAAAAGTTTTCCTTGCGGATACTGGTGGACCATTCTATTGTTGAAAGCTTTGCTCAAGGTGGAAGGACGGTTGTGACATCTCGGGTTTATCCAACAAAGGCAATCTATGGAGCTGCTAGGTTGTTCTTGTTCAA
Gma.153.1.S1_x_at	Y10491.1	At4g31940	1e-122	Metabolism	Cytochrome P450	CYP82C	ATCCACACAGATCATAACGTTTGGTCAAATCCATTAGAGTTTAAACCAGAAAGGTTCCTTACGACTGATAAAGATATAGACATGAAGGGTCAACATTTTCAGCTATTACCATTTGGAGGTGGTAGGAGGATTTGTCCTGGAATAAACTTAGGCCTTCAAACAGTTCGTTTGACACTTGCTAGTTTTTTGCATTCCTTTGAAATCTTAAATCCATCAACTGAGCCTCTTGATATGACTGAAGTCTTTAGAGCAACCAACACTAAAGCCACTCCACTTGAGATTCTTATTAAACCACGCCTATCTCCTAGTTGTTATGAAAGTATCTAATATTTAATTATGTGTTAGTTGTGTGAACCTGCTGTCTGTATTTTTTATTTTTAAACTATATGTAATCTGTTT…
Gma.1449.1.S1_at	AY157740.1	At4g09320	2e-72	Metabolism	Nucleotide Biosynthesis/Metabolism		AGTAATACAAATGCCTCAAGTTGATCTTGAAATTGGCCTTAGGTTGATCCAGATTATCTACATGTTTTCTGTTTTTGTCCATTGTTGGACTTTTGCTAAGAGTTTGGTACCGTGGTTTGCATGTAGAGTCTATTTATGTCATTTCTGTTGAANCATGCTCACAGTTTGATAAATTAAA
Gma.1449.1.S1_s_at	AY157740.1	At4g09320	2e-72	Metabolism	Nucleotide Biosynthesis/Metabolism		TGGACCGTCCTTTTGCTGAGAAGCACTATGCTGATTTGTCTGCAAAGCCTTTCTTTAGTGGTTTGGTGGATTACATTGTCTCTGGCCCTGTTGTTGCCATGATCTGGGAGGGTAAGAATGTTGTTACAACTGGCCGAAAGATTATCGGAGCCACAAACCCAGCTCAATCTGAGCCTGGAACTATTCGTGGTGACTTTGCTATTGACATTGGAAGGAATGTTATCCATGGAAGTGATTCAGTTGAGAGTGCTAACAAGGAAATTGCATTGTGGTTCCCTGAGGGCCCTGCTAACTGGCAAAGCTCCCAGCACTCTTGGATCTATGAGTAATACAAATGCCTCAAGTTGATCTTGAAATTGGCCTTAGGTTGATCCAGATTATCTACATGTTTTCT
Gma.1451.1.S1_at	BE209936	At2g39570	1e-149	Metabolism			GAACTTCTGGTTGCTAATCCTGTGGAGCTGAGTGGAAAGGGGAGACCCCGTGTATTCTATGATGTTACGTTGACTTTAAAAGCGTTGGGAGTAGGCATTTTCTCGGCTGAAGTTGTTAGACATTCAACACAAGAACGTCAATGGGAAGTGTATAGATTTTTGTTGGAGGAAAGCCGTGACTTTCCATTGACCAGAAGCCAAGCAAGAACTCAGATTGTTGACAAAGTTAGAAGAACACTGATGGGCTGGTAATCTGGTTCAGTATCAAATGAAAAAGCACTTTCCGTTCAGTTTTTATGTTAAATATCAATTTGGTTTGCCGTTTGAATATGGTTAAGTTAGCAGGGTATCTAATTAACGACAAACATATACTTTTAGCATTGTACATCATCTTATGTT…
Gma.1430.2.S1_a_at	BF068964	At3g22850	2e-97	Metabolism			GCATTTGTTGCTGCGGATGCTGATGGGAGTGTTCCCTTTGTCTGGGGAACTGATGCTGATGGAAATCTCGTTTTCTCAGATGAGACAGAGATCGTAACTAAGAGCTGTGGGAAATCTTACGCACCATTCCCCAAAGGATTTTTCTTTTCAACATCCGGAGGTTTGAGCAGTTTTGAGCATCCACTGAATGAGGTGAAGCCTGTACCAAGGGTTGNNAGTTCCGGACAGGTGTGTGGTGCAACTTTCAAGGTGGATGCTGAGGCTAAGAAGGAAGCAACTGGCATGCCAAGGGTTGGGAGTGCTGCTAACTGGTCAAATAATATCTGATTGCGACTCTATTCTGTTTGAATTATGGGCTTTTATTTTATCATAGCTGCACTCGGC
Gma.1445.1.S1_a_at	BQ454241	At1g80820	2e-88	Metabolism			GATGAAAAGAATCCGAGAGCAAAACCCTACACTTTTTCA
Gma.1445.2.S1_at	BQ610936	At1g15950	1e-135	Metabolism			TGAGTCAGTGTCTATATGAAACAGTGAAGAGCCTGCAGGAGAAAGGCCACCTTCCAGTTCCTGCAAAGCAGCAGGAAGAAGATTCAACTACCGTGAAATCCTAAATGAGCAGCTAGTTGTCCACTAAGGCAAGAAGCTGCAGCTTGTGGCAATCTGTGCTCATCTTATATATTATAATAGAGAATCCTACATTAGAAGACTGCTGTATTTGGATTTTGTTAAAAAGACATCAACTAAATTGTTGCCGTGTATGAACTTATAA
Gma.13487.1.S1_x_at	BG045417	At3g14390	1e-128	Metabolism			TGATGCTTACCAGCATATAGAGCTGGTTTCCCCTGCCCCNTCAAATGCTGANACANNAACTTTTGATGTGGTTGGCCCTGTCTGTGAGTCTGCAGATTTCTTAGGAAAAGGAAGAGAACTNCCTACTCCAGCCAAGGGTACTGGTTTGGTTGTTCATGATGCTGGTGCTTATTGCATGAGCATGGCATCAACCTACAATCTNAAGATGCGGCCTCCTGAGTATTGGGTTGAAGATGATGGATCAGTGAGCAAAATAAGNCATGGAGAGACTTTTGAAGANCACATTCGGTTTTTTGAGGGGCTTTGANNNNNTNATTTATNTTGTANGAAAGAAGGNTGGAGAATTNTTNTGTANTTGGAGTTTGAATCTTTCCTNGTCAATGAATGCATGACTCTTAG…
Gma.1370.1.S1_at	BQ079614	At2g15230	1e-132	Metabolism			GATGATCCGCAAAGGTACCTACTCCAAGTATGATTATGGAAAGCTAAAAAATCTGATAGAGTACGGCAAGTTCAATCCACCAAAGTTCGANCTTAGTCGCATACCCAAATCATTGCCTCTGTGGATGGCNTANGGTGGAAATGATGCTNTGGCAGATATAACTGATTTCCAGCACACACTCAAGGAATTGCCATCCNCACCGGAAGTGGTTTATCTTGAAAACTATGGTCATGTTGACTTCATTTTAAGCTTGCAAGCAAAACAAGATCTTTATGACCCTATGATTAGTTTTTTCAAGTCATCCGGAAAATTTAGTAGTGTGTAAATTTCCTTCATTCCGGTATGATGGATGCAATACAATGGTCTACGTGTTTATATATTACTGCACTTTCTGTAAAG…
Gma.12207.1.S1_at	U43683.1	At5g13710	1e-167	Metabolism			TGGGCTACCTGACATTCGATTGACTGCTAAGTGTCTTGAAGCTCTGAAGCAAGCAGGTTTTGAGGTAATATGGGAGAAAGATCTAGCAGTGGACTCTCCTCTTCCTTGGTATTTGCCTTTAGACAAAAGTCACTTCTCACTGAGTAGCTTCCGTCTAACTGCTGTCGGGCGACTTTTCACCAAAAACATGGTCAAGGTTCTGGAGTATGTTGGACTGGCTCCAAAGGGTAGTCTAAGGGTTCAAGACTTCCTGGAGAAGGCTGCAGAGGGACTAGTTGAAGGAGGGAAGAGAGAGATTTTCACACCAATGTACTTCTTCCTGGCNCGGAAGCCTGATTNAGACAGGAACTAAGCTGGNTGTACAAATAGGTTGCTGTTTTCATCAGTTACNGTGATTCT…
Gma.12152.1.S1_at	BG650241	At1g74260	1e-125	Metabolism	Purine Base Biosynthesis		GGGTGGCAGCTATTTGTTCCCCAGATGGGAGGCATCTTGCCATGATGCCTCATCCTGAGCGTTGCTTCTTAATGTGGCAGTTCCCATGGTATCCAAAGCAGTGGGATGTGGAGAAGAAGGGGCCTAGTCCTTGGTTACGCATGTTCCAGAATGCAAGAGAGTGGTGTTCCTGAAATGATCAAATGTTTTTCTCATCTTGTCTTATCTTTTTCTTTNCTTTTTCCNNATATAAAGCACTTGTCCTTGCTTTAGTTGACAACTTATCCATGTCCTCCTTCAATAATTAATGGACAGGTTACTCATCAATAAC
Gma.1248.1.S1_s_at	AJ518837.1	At2g32150	2e-86	Metabolism			AAAGGAGCTGACTATGCTGTGGAGAGTGTGCATAACTTGGCACAAGTGATCCCAGAGATATGGGCAAACGAAATGGACGGTGGTGATCCAACGATGACACGTTCGAAGAGTGAATTGGAGGCCGTACTCGCTTGTGCTCTGGTTGGAGCTTGAAAATTGACGTTGTACAAAAATGTACATTCCCAACCAACCCAACTATCTATGCAATTAAAAATAATAGTACAGTAGTATAAATAGTATCAGACCACCAATAGCGAAGACAATAACAGTAAGTAACGTGGACCCCCTAAGCAATTATTTGCGACATGTGAATATTGTAAG
Gma.1269.1.S1_at	AW309671	At1g51410	1e-135	Metabolism			GACCTTGGGGATTGAATTTATTCCTTTGGAAGTGAGTCTTAGAGAGACAGTGGAAACTTTGAAAGAAAAGAACTTTGCCAACTTTTAGTCTCTGATATCTCTGCTTGATCAGGAGTGAACACGTTGAGAATCTCAACGGTGTTTCGNTTGTGGTTCTGGTTTTAGAATCTCATTGCTTGAAAATAAACTATTGTACTGAAATGTCAAGCTTGTGTGTTGTAATAAAACAAGATTAATTGTTGGTTTTATTTCGGTTTGTACTCATGAAGGAAACCAACGTGTGGTATA
Gma.15918.1.S1_s_at	BM519864	At2g16570	1e-109	Metabolism			TTGTTTCTCTGGGAATTACCCTGTGGAGCCNAGAGAGCTTAANGTGAAGAGGGTTGGGGACTTTGTTGATGATGGCTTGAATGGNAGCTTGGAGTCTATTGATGGTGGTTGGGTTCAGGCAAACCNAAATCAAATCAAGNTTGGTACTGGTACTAGTACTAGTATTTCATAATANTCCTATATCTGGTTTTTGCAGCATAAGGCATCCCTCAGTGGACAAAAATCAGATGCAGTTCTTCAGGTGTTTTTGGTGTTGTTCT
Gma.1555.3.S1_at	CD397060	At1g03475	1e-163	Metabolism			CTGACTGCTCGGTGGGAATACGATCATAAACCGGAAGAAGGAAGCGAAGAATGGAAACTCTTGGACGCATGCATCAACCCCAAGGAATGGATCTAATTCATCAGTTGACCCCCCAATTTGTCAGCTTTTTAATTTAATAATAAGGGAGCTTGTTTCTTTTTTCGGTGTATATCAAGTGCTTGTTATGATGAGTCAGAATGTTAGCTTGTTGTACTAGGTGGATTGTAAATCACGTATTTTGCTAGAGTCATCCGCGTAAAGCGTGAAAATGCAGAAAATTACAAATGTCTAGGCTGCGTCTGTAGTATACCTACTGCCAACCATTGTTCTTTCTACAAGTAACTCCTCAATCCCATGTAAGAAAACAAAAGGCAGCTTCTTTAATGCCAGTATTGCACA…
Gma.15478.1.S1_at	BI968543	At1g02500	0	Metabolism			CATTCCACTGCAATGTGCTGGGAGTTTTTTAGCGTTGCCCTTATAATGTCTATTATCCATAACTTTCC
Gma.15478.1.S1_x_at	BI968543	At1g02500	0	Metabolism			TGGTGTGCCCGAGCCTTTGTCTGTCTTTGTTGACACCTATGGCACCGGGAAGATCCATGATAAGGAGATTCTCAACATTGTGAAGGAGAACTTTGATTTCAGGCCCGGTATGATCTCCATCAACCTTGATCTCAAGAGGGGTGGGAATAACAGGTTCTTGAAGACTGCTGCATATGGACACTTCGGCAGAGAGGACCCTGACTTCACATGGGAAGTGGTCAAGCCCCTCAAGTGGGAGAAGGCCTAAGGCCATTCATTCCACTGCAATGTGCTGGGAGTTTTTTAGCGTTGCCCTTATAATGTCTATTATCCATAACTTTCCACGTCCCTTGCTCTGTGTTTTTCTCTCGTCGTCCTCCTCCTATTTTGTTTCTCCTGCCTTTCATTTGTAAT
Gma.15478.2.S1_at	BQ453781	At4g01850	0	Metabolism			AATTCATTCCACTGCTCTATGCTGGAAGTTTTTTGAGCGTTGCCCTTATAATATGTCTAATATCCATAACTTTCCACGTCTCTTACTCTGTGTGTTTCTCTCCTCTTCCTCCTATTTTGTTATTTGTATGTTCTTTTGTAATTTTTTACGTGATCAACTAAAAACATGTACTCTCTGTTTGTATGTATGCCCTACCAATGTGTCTCTTAATATCAATATCAAAAAGAGAGTGTTCAAGTTAANNNNNNNANNNNAANNNNNNNNNNNNTNNAGNNNNNNNNNCNNNNTNGGTNATATGATAAATGCTAGGCAAGTGTGTTGTTGTA
Gma.15483.2.S1_a_at	AW309524	At1g23190	9e-39	Metabolism	Sucrose Biosynthesis		GATGGATCACGATTGATTTTCCGCCTATCTGGAACTGGNNNNGNNNNNNGCAACAATTCGANTATACATTGAGCAATATGAGAAGGATCCATCAAAGATTGGGAGACTTTCAAANGAAGCNCTTGCTCCTCTTGTGGAAGTTGCNTTGAAACTTTCGAAGATGGAAGAATTCACTGGTCGATCCGCTCCAACAGTCATTACATGAACACATTCAAGTGGAAGGTGGTTAGATCCTGAAGCTTCTCCCAGTCATTTCATTTCTTCTTTGTCCAGTATCTTACGGATAGCCGAACAGTAGATTTGGTTGTTTGCAGCCTTTGCTATGG
Gma.15564.1.S1_a_at	AF293970.1	At2g22240	0	Metabolism			TTAGCTGCTCCTATTATCTTGGACTTGGTCCTTCTTGCTGAGCT
Gma.1559.1.S1_at	CD394386	At1g69230	1e-06	Metabolism			AAGAGCATGGGTCGTGGAGTTAGCAGTGGTGGTGGTCAAAGTTCNTTGGGTTATCTTTTTGGCAGTGGAGAGGCCCCTGCCNCAAAACCNGCAACAAANAATGCCCCAGCCCAACCTGAAGTGCAGGCTGTAAATAATGNGCCTCCTNCAAAAGCATCTCCTCCTACTAAAACAATAGACCCTAACAAGGCTGCTGGTATNAACAGTCATTCTACTGATGGCCAGAACACCGGCAACTTCATCACGGACCGACCCTCAACCAAGGTCCATGCTGCCCCTGGTGGTGGTTCTTCNCTNGNGTTATCTCTTTGGTGNACCTGGNGAGGGGAAATGATACCTTGNTTGCAAAGCTTTTGCTCGATGANNNANGATTTATTTTGNAAATTCAGGTCGTGGAAA…
Gma.1560.1.S1_s_at	BQ298777	At1g78380	3e-74	Metabolism			GAGACACTAACTGACAAACCCTTTTATGGGGATGACACGTTTGGCTTTGTTGATCTTTGTTTGATCACTTTCTCTAGTTGGTTTTATACTTATGAGACATATGGGAACTTCAAAATGGAAGAAGAGTGTCCTAAACTCATGGCTTGGGTCAAGAGATGCATGGAGAGAGAGACTGTGTCCAATACTCTNCCTGATGCTAAGAAGGTGTATGGTCTTATTGTGGAACTGCAGAAGACACTTGAATCGAAATAGAAGATTTCAATAAATCAACCCATTAAATAATATTTTCATGTTAAATATGTTGTTGTAAGGTCTTGTGTACNNNTCCTCTATGGTTGTGTGGGTTGGGTCAGTCATTTATGTGGTTTACTAGACACTAATACATCTTCTCTATTGAAG…
Gma.1571.1.S1_at	BQ612406	At1g74920	0	Metabolism			AGAAGTTTTTGGACCTGTGCTATGTGTGAAAACATTCAGTACCGAAGAAGAAGCTATTGAACTAGCAAATGACACACACTACGGCTTAGGGTCTGCTGTAATGTCAAAAGATCTAGAAAGATGCGAGCGCATATCAAAGGCTATTCAGGCTGGAATTGTATGGATAAATTGTGCTCAACCAAGCTTCATTCAAGCTCCATGGGGAGGCGTTAAACGTAGTGGTTTTGGTCGTGAACTAGGAGAATGGGGACTCGAGAACTATTTAAGTGTGAAGCAAGTGACCAAGTACATATCTGATGAACCGTGGGGCTGGTATCAGTCGCCTTCAAAGCTGTGATATGAATTGCTGTTCTAAAATCTGGCATGAATAAGTTGTGGGGGACATTAATTTGTGATGAT…
Gma.1650.1.S1_at	BM893382	At5g40370	1e-40	Metabolism			GAGATATCGAAGATGGCTCTGCCCAAAGCTAAGGAGATCGTGTCGTCCAATTCCGTCGTCGTTTTCAGCAAAACCTATTGCCCTTTCTGCGTCGATGTGAAGAAGCTCTTCGGTGACCTCGGTGCCAATTACAAGGCCATCGAACTCGACACTGAATCCGATGGAAAAGAGCTCCAAGCAGCATTAGTTGAGTGGACGGACCAGCGAA
Gma.16580.1.S1_at	CD404403	At1g19600	1e-147	Metabolism			GAAAGATGATCCTATAGCTGCTGTAGAATTTCTTTCCAAATACTGCCAATGGGCTGTTGTAACATTGGGTGCTAATGGGTGCATTGCCAAACATGGAAAGGAGATGATACAAGTCCCGGCCATTGGGGAAACAAAGGCAACCGATGCTACAGGAGCAGGGGACCTTTTTGCAAGTGGATTTTTGTATGGAGTGGTCAAGGGTTTGTCACTAGAAGAATGCTGCAAAGTAGGCACATGCAGTGGTGGATCTGTTATCCGGTCTCTTGGTGGTGAGGTAACGTTGGAGAATTGGCAATGGATGTACAAGCAGATGCAGATAAACGGTCTGCCCACGCCTNCCGGTTTATGCAAATGAATAGTAGCAACCGTTGCCCCCTTAATTTGTGCTGTCTTATATTT…
Gma.16444.1.S1_a_at	AW101824	At1g20330	1e-179	Metabolism			GGCGGAACCATATTGTGGTCACTGTTCTCGCCGCTTTGGGAATCGCGCCTAAGGGGACCGTCGATGTTCATGAGATGCTCTTCAAGACCGCTGACTATTTGACCAGAGGG
Gma.1689.1.S1_s_at	AB007907.1	At3g02360	0	Metabolism			GCCAAAATCTGTAGTTATGCACAGGGAATGAATTTGATCCGTGCAAAGAGTATTGAAAAGGGTTGGGATTTGAAGTTGGGTGAACTGGCCCGGATTTGGAAAGGNGGTTGCATNATTAGAGCAATATTCTTAGACAGAATCAAGCANGCNTATGANAGAAACCCTAATCTGGCAAACCTTCTTGTGGATCCAGAGTTTGCAAAGGAAATAATNGATNNCCAATCTGCCTGGAGGAGAGTTGTTTGCCTTGCTATCAATTCTGGTATNAGCACTCCAGGTATGTCTGCTAGTCTTGCTTATTTTGACACTTACAGAAGGGAAAGGTTGCCAGCTAATTTGGTGCAAGCTCAACGAGACTACTTTGGTGCTCATACATATGAAAGGGTTGACATAGAGGGG…
Gma.16930.1.S1_at	CD400862	At4g13930	0	Metabolism			TTTGGTGATAGCAGTGCCTTGGCCCCNGGTGGAGTGCGAATTGGNGCCCCTGCCATGACTTCTAGGGGTTTGGTTGAAAANGACTTTGAGCAGATTGGTGAGTTCCTTCACCGTGCTGTGACTCTCACACTGGAGATCCAGAAGGAGCATGGCAAACTTCTCAAGGATTTCAACAAGGGNCTCGTCAACAACAAGGCNATTGAAGATCTCAAAGCTGATGTTGAGAAGTTCTCTGCCNNNTTTGACATGCCTGGCTTCCTGGTATCTGAAATGAAGTACAAGGATTAGGTTCAANCATANCNCTNTCTACTNAATTGTGTCACTCAANGTTCGNCACAAAGNGCAGAAATGGAGAAAAAGGAAATANGTGTCTTCCTTTCCTGGGAGTGATAGGGTTTA…
Gma.16735.2.S1_at	BI699988	At1g75280	1e-108	Metabolism			AACTATTGCACCCAAGTTGATCAATAAAATCAAAGCATCTTGTTGTGTATGGCTGGAGAATATGTACTGTCTTTCTATTATTTAGTTACTTGTGCTTGTGTTGGCGTCAAAAGAGTTCTTCCTTACTTTACACTGTAANCTGTACTGTTGTTCGCTTAGCTTGNNNNNNNNNNNAAGTTCTTCTAGTATTTATTATGGNTCCGTTGCAATTTGTTCATCACCACTCTGATCCTAGTGGATGTGCGTTGAAACTCAATTGCCAACAAGTATTACAGTGTGATTATCTCGAAGTTCTTAT
Gma.1681.1.S1_s_at	BI967482	At1g02500	0	Metabolism			AGTGGTGCCTACATTGTGAGGCAAGCTGCAAAGAGCATTGTTGCAAATGGACTTGCTAGGAGGGCAATTGTGCAAGTTTCCTATGCCATTGGTGTGCCTGAGCCCTTGTCTGTGTTTGTTGACACTTATGGCACTGGGAAGATCCCTGACAAGGAAATCCTCAGCATTGTGAAGGAGAGTTTTGACTTCAGGCCTGGCATGATCTCCATCAACCTTGATCTCAAGAGGGGTGGAAATGGCAGGTTCTTGAAGAC
Gma.1681.2.S1_a_at	BI786679	At4g01850	1e-58	Metabolism			AGCACAAAGCGGGTTACTGTCTGTTCAAGCTACCATCTCTCTCTCTCTTTCTTAGTGCCTCCTTGCCAGAAGTTAAAATGGCCCAAGAAACTTTCCTATTCACATCTGAATCAGTGAACGAGGGGCACCCTGACAAGCTCTGTGACCAGATCTCCGATGCTGTGCTCGATGCATGCTTGGAGCAGGACCCTGACAGCAAGGTTGCCTGTGAAACCTGCACCAAGACCAACATGGTGATGGTTTTCGGAGAGATCACAACCAAGGCCAACGTGGACTATGAGAAGATTGTGCGTGACACATGCAGGAACATTGGTTTTGTCTCTGATGATGTTGGTCTTGATGCTGACAACTGCAAGGTCCTCGTCAACATTGAGCAACAGAGTCCTGATATTGCTCAAG…
Gma.10876.1.S1_at	CD391960	At5g22740	0	Metabolism			CAGACCTTAACATTCTCAATTGTAGGATTTGGCTACGTTGGCACCATCGTGTAAACCTCNTTGAGCCAAATTTCTCAAGTTACTTAAGTTTCANCAATGTTGTGTCCATATTTTTCTAGTTTCTCCTAAAAAAAANTACATCAANNGAGGCTGATTTCTTCAAGCAACAAACNCNGTACCAAANTCATCTACAGCTAGTTTAGCTCAAATNATTTTCAATTCGGAAAGAAAAAANNNGTCCTTTCCAANATTTCATTGNCATCCATCATCAAGAAGATACAAATCATCACAGNCAAAGTGCTGTTATTACTAGAATTGCATTANACAGGCTTAAGNGCAGCTATGAAGANGTACCNAAAANNNAAAGTGGTTAAATTAGAGCCTTAGANATNAAGTAGA…
Gma.1079.1.S1_s_at	AW350347	At4g13940	0	Metabolism			AGTTTTGTGATGTCCTGCTCCTTCACCAACCAGGTCATTGCTCAGCTTGAGTTGTGGAAGGAGAAGAGTACCGGCAAGTACGAGAAGAAGGTTTACGTTTTGCCCAAGCACCTTGATGAGAAGGTGGCTGCACTTCACCTGGGCAAACTTGGAGCTAAGCTNACCNAGCTTAGCNNGNCCCAGGCTGATTACATCAGTGTGCCTGTTGAGGGTCCATACAAGCCTGCTCACTACAGGTACTAAGTGATTGAGATGATCAACTGAAAAGTGAGTGAGGGAAAGACAAAAATCGGTTTTATCAATCGGATTTGATTGTTTAATTTTCCTTTTTTTGATTTTTGGTGTTAGACTTTTCAGATTTGTGGTAGAAGAATTGTAGCCNNNNNNATTTTTATTTCT…
Gma.10794.1.S1_at	BU577866	At5g66680	1e-157	Metabolism			GATAATTTGGAATACTCTGTTGAAGTTTATGAGTGGTCTGGGACANCATGGGAACCTTANGTAGCTGATGATGTTCAAGTGCAATTTTACATGATGAGCCCCTATGTCTTGAAGACTTTATCAACTGANGGCAAGGGCCNTTATTTCACATCATTTAAGGTTCCAGATGTCTATGGGGTTTTCCAATTCAAAGTTGAGTACGAAAAACTTGGATATACAAGCTTATCTTTATCAAAGCAGATTCCTGTTCGTCCCTTTAGACACAATGAATATGAAAGATTTATACCAGCAGCNTATCCCTATTATGGAGCANCATTTTCAATGATGGNNGGNTTCTTCATCTTCACNGCAGTTCATCTATACAGCAAGTAGA
Gma.10216.1.S1_at	BI969369	At5g54160	1e-68	Metabolism			GGTGTTAATTTTGACTTGCCACATGTCATAGAGCATGCTCCTACATACCCCGGTATCGAACATGTAGGAGGAGATATGTTTGAGAGTGTTCCCAACGGAGACGNCATTTTTATGAAGTGGATACTTCACGATTGGAGTGATGAACAATGCTTGAAGTTGTTGAAGAATTGTCATAAAGCTATTCCTAGTGATGGAAAAGTGATTGTTGTGGACTTAATTCTTCCCATTTTGCCCGAGAGCACAGTTACTGCTAAGAGTGGTTTCCAAGCTGACCTCTTAATGATGACTCAAAACTCAGGAGGAAAAGAGAGAACCCAACATGAATTCATGGAATTGGCATTAAGTTCTGGATTCAGTGGCATCAAAATCGTTTGCAGTGTCTCTGGCTTCTGGGTTATG…
Gma.10690.2.S1_s_at	AW394305	At5g66120	2e-62	Metabolism			GGTAATGGCTGTTGACATGTCATATCGCCTAGGTTGGATTGATGATTCTCTAGTGAAGAGAGTTGGAGATATTTTAAAACAGGCTAAGTTACCNNCAGCCCCTCCTGAGACCGTGACTGTGGACATGTTTAAATCTGTCATGGCAGTGGATAAGAAGGTAGCAGATGGGTTGCTAAGGCTTATCCTTCTAAAGGGNCCTCTAGGCAATTGNGTTTTCACAGGGGATTATGACAGAAAGGCTCTAGACNATACGCTTCGTGCATTCTGTAAATCCTGATCTTTGTGCTCCATGTTTCTATTGCAGCTTTATCCAATTCCTTTTAG
Gma.10695.1.S1_at	CD394954	At4g11820	2e-58	Metabolism	Lipid Biosynthesis/Metabolism		CAGTCAACATCCGTTTAGCTTGTCAAACANTGNCTAGAGTGATGNATGTCGATGGAAAATTGAAGTCAAGACATGAGTTTCCCCCNGNAGGAGTTTGTTGAAAACNTGAAGNTAATGGAGCATAGNTATGGTGNNAAGGAATTTGTGACAAGCAAGGACANTAGCCTTTTATCTCCNGGCACATTCTANCTCACTGAAGTTGACTCCATGTATCGGAGATTCTATTCAAAGAAAACTAAAGANAGCAGTTTGACTCNCGCTGAGAACGGTGTGATTGCTAATGGCGTTGCTAATGGCNNNNNNNNNNNNCACTGATGTTGAGCATGTACAATCAGCAGTCAACTTCGCCTAGAATGAGGAAGGGTATTGTTATTTGCGAAGTTCTGTTGGTAAATTGTT…
Gma.10721.1.S1_s_at	AF074940.1	At3g17240	0	Metabolism			TTGAATACCGTGTTGGCAAGTTCCCNTTCNTGGCTAATAGCAGAGCTAAGGCAATTGACAATGCTGAAGGACTGGTGAAGATATTGGCTGAAAANGAGACAGACAAGATATTGGGAGTGCACATTATGGCACCCAATGCAGGAGAGCTTATTCATGAAGCAGCAATAGCACTACAGTATGATGCATCTAGTGAGGACATTGCACGTGTGTGCCATGCACATCCAACAATGAGCGAGGCTGTGAAAGAAGCCGCAATGGCCACTTATGACAAGCCCATTCACATTTAAAAGGAGCCGGTTGCTACTTTCTTCTTGTTTTCATTTTTGTCCAAGAATTTTACAATGACTTGGAGATGATACATCCTGTGTTAAATTTAGATTCAGGTTTTTAAATGCAAAT…
Gma.10722.1.S1_at	BE823336	At3g55440	7e-84	Metabolism			CTGCCTTTCAAGCTGCTTCGGAAATTGCTGTTTTTGAGTTTT
Gma.11164.1.S1_at	AW350722	At2g33150	0	Metabolism	Amino Acid Biosynthesis/Metabolism	Isoleucine Catabolism	TGCTGCAATTCCTGTTGCTGTTAAGGCTGCAGGTCTAGAGCTTGATGATATTGATCTTTTTGAAATAAATGAGGCATTTGCCTCCCAGTTCGTGTATTGCCGTAACAAGCTAGGGCTTGATCCAGAAAAGATCAATGTTAATGGAGGTGCAATGGCAATTGGGCATCCTCTGGGTTCAACAGGTGCTCGATGTGTTGCAACTCTGTTGCATGAAATGAAGAAACGTGGCAGGGACTGTCGATTTGGAGTTATATCTATGTGCATAGGTACTGGAATGGGGGCAGCTGCTGTTTTTGAGAGTGGTGATTGTGCTGATGAGCTATGCAATGCCCGGAAAGTGGATGACCTTCTTTTATCCAAGGATGCTCGCTTGAAATAGTTACTTCATACTCACTATAT…
Gma.11027.1.S1_at	BG511525	At5g43940	0	Metabolism			GTTGCAGCATCAGGGCAGGAAATATCNACCCGTCCNTTCCAGTTGGTGAGTGGACGNGTCTGGAAAGGAACAGCTTTTGGTGGCTTCAAGAGCAGGTCACAGGTGCCTTGGCTTGTAGACAAGTACTTGAAGAAGGAAATCAAGGTTGATGAGTANATTACCCATACTTTGACNCTTTCGGAGATCAACAAGGCTTTTGATCTTTTGCATGAAGGGGGATGNCTTCGNTGTGTGCTTTCNACACAAGAATGAGGTTATCTATGCTAGCCTGGCTACTTTCGTGAGGAATGGATGTGTTGGGTTGCTTTTCCCCTCTTTTAGTGGTTGTAGTTTGAACTTGAAATAAATCTCGAGTGGNTATAGTTTGTAAGTAAGATCATTTTGGTCTATAATATGGAT…
Gma.11028.1.S1_s_at	BE823084	At5g14780	1e-121	Metabolism			GATTGTTAACAATGCTCGAGGGGCAATTGCGGACACNCAAGCAATTGCNGATGCTTGCTCCAGTGGCCACGTTGCAGGTTATAGTGGTGATGTTTGGTTCCCACANCCAGCTCCAAAGGATCATCCATGGCGNTACATGCCAAACCATGCCATGACTCCTCATATTTCTGGNACCACCATNGATGCACAGTTACGTTATGCTGCTGGNGTCAAAGACATGCTTGATAGGCACTTCAAGGGTGAAGACTTTCCAGAACAAAACTACATTG
Gma.11028.2.S1_s_at	CA782711	At5g14780	1e-169	Metabolism			GGGCAATTATGGACACCCAAGCAATTGCTGATGCTTGCTCTAGTGGCCACGTTGCAGGCTATGGTGGTGATGTTTGGCCCATACAACCAGNTCCAAAGGACCATCCATGGCGNTACATGCCAAACCATGCCATGACTCCTCATATTTCTGGCACCACCATTGATGCACAGTTACGTTATGCTGCTGGTGTCAAAGACATGCTTGATAGGCACTTCAAGGGTGAAGACTTTCCAGAACAAAACTACATTGTGAAGGAGGGTCAACTTGCAAGCCAGTATCGTTGAAGTGATGCTTTTGTTGAATTTGAATCTTCCATTTTAAAGTTCCACGGATTAGCAAATAAAGATCTATATAGAGGGCACTCTAATTATATAATGTACTTGCTTTGTTGAATTTGAA…
Gma.11052.1.S1_at	AI795084	At3g23490	5e-57	Metabolism			GCCATGCATATTTATACAATGTTTTATGGCTTTGGATATTTCATGACACTTGCACCATGTATTTTAATGCCAGTTAATTATAAGATGGAGAAGCTTGTATTGTGCTTGGTTGAGCAAGTCAAATAA
Gma.11082.2.A1_s_at	AW310165		0.006	Metabolism			TCATTTTCTCTTCATCTAGATTTTTCATGACAGATATTCCTTTCATTAAAACAGGTTGCGTGAATGGTGGAGTTCTCAAATGTTCNACTGTCTTTTCTAGATCTTTGTGTGTTTCTTGTCACG
Gma.11126.1.S1_at	AI960156	At5g11670	1e-160	Metabolism			CAAGGGCAAAGTGTACTATTCTGGCCAGGCCAACAATGCNTACATNTTNCCCNGGNCTTTGGTCTNGGGNTTGGTAATCTCAGGAGCAATCAGAGTGCATGA
Gma.11126.1.S1_x_at	AI960156	At5g11670	1e-160	Metabolism			AAGTCCATTTGATCCTGTAGAATACAAGGGCAAAGTGTACTATTCTGGCCAGGCCAACAATGCNTACATNTTNCCCNGGNCTTTGGTCTNGGGNTTGGTAATCTCAGGAGCAATCAGAGTGCATGANNGATATGCTTCTAGCAGCTTCGGAAGCCTTGGCTAAACTNGTGNCCNANGAGAACTACGAAAAGGGCTTGATTTATCCACCATTCTCTAACATCAGANAAATTTCAGCTAACATAGCNGCAAGTGTAGCTGNCAAGGCATATGAGCTAGGCTTGGCTAC
Gma.11275.1.S1_at	CD407624	At5g64370	0	Metabolism			CCCGCAATAGGGACGGCTTGTTAGTAACAGACATGGATCTTAACCTGTGCAGGCAGGTGAAAGACAAGTGGGGTTTCAGAATGACTTCACGGTACGAGTTATATGCCGACACACTCGCCCGCTATGTGAAACCAGACTTTGAGCCACAAGTCACCAGTGACCCCTTGTTGCATAGGAAGTCCTTGTGAACTATGCTCTCAAGTGTTGGTGTTAATATGTGTTCATTGCTTGTGGTTCAGATTCTGGTCTGTCGTGGGATGGCCAGTGGAAACAACCTTAAATAAAGTTCTTTCATGTTGAGTACATGTTCATGTATTAAATTCTGTTGTCAATGGTTCACCGTCATGGTTGGTTGATTTGGTCCCATTTTACATG
Gma.11238.1.S1_at	BQ454110	At5g60600	0	Metabolism			GGCATTCAAGGCCATAGTAAGATGAGCATTGTCATATCCAATTATTGTACACATGTAATATAAGATAACACTCAATGCTTAAGTTTGAGCCTAGTTTTAAGTTCCTTTTGAGAAAGATCCCAATTAAAGCTTGTTGTGAGGAAATCGACAGCTAGAACATGTATACAGATAACAGTGTATTGCTTTGCCCCATCAGCCATCAATAATAAT
Gma.1179.1.S1_at	AY096000.1	At3g16150	1e-159	Metabolism			GCGCATCGGTGATTCGCCGCTGATAGGCGCCGGGACCTACGCGTGCGACGTGTGCGGCGTATCGTGCACGGGTGAAGGCGAGGCCATCATACGTGGCACGCTGGCGCGTGAGGTGGCAGCGGTGATGGAATACAAAGGCTTGAAGCTTCAAGAAGCCGTGGATTTTGTGATCAAGCACCGTCTCGATGAAGGGATGGCTGGTCTCATTGCTGTGTCCAACGCTGGGGAAGTGGCTTATGGTTTCAATTGCAATGGCATGTTTAGGGGCTGTGCCACTGAAAATGGCTTCATGGAGGTCGGAATCTGGGAATAGCTTCATTATTTTCCTTCATGGTTNGTTTCGATGCAACTTTTGGATTTCTGTACCATGTTCCACTGTAGTGTAGGGTCTTTCTGCTG…
Gma.12012.1.S1_s_at	BU548282	At1g55740	1e-160	Metabolism			AAAGGATGCATCCATCCCAGTTACCTTGAAAACCAGAGAATATGAAGTTTTCACAATAGTTCCCGTGAAGGAATTGAGCAATGGTGTCGAATTTGCTCCTATTGGTTTAATAAAGATGTTCAATTCAGGAGGGGCTGTCAAAGAGTTTAATTGGGGATCTAATGAAAGTACAAATGTAGCCATGAAAGTCCGTGGTTGTGGCCAATTTGGTGCTTATTCATCAGCTCAGCCTAAGTTGATAACAGTTGACTCAGAAGAGGTAGAATTCAAGTATGAGGAAGAATCTGGATTGGTGACTATTGATTTGAGAGTACCTGAGAAAGAGTTATACCAATGGAGCATTTCTATTGATTTTTGAATCAGAGACTTTGTCTCAAGATGAAGGGGTTTAGAGTTATA…
Gma.1137.1.S1_a_at	BF067710	At5g48930	0	Metabolism			AGCAGAATCCACAATGCATTGTTACGAATGGACAACGATTATTTGAGATCGGCTCTTGACTATCTAGAACTGCAACCCGATCTAAAAGCGCTGGTTCGTGGGGCTCATACTTTCAAGTGTCCAAACCTTGGTATCACTAGCTGGACTAGGCTTCCAATCCATGATGCTGACTTTGGTTGGGGAAGGCCAATATTCATGGGACCTGGTGGAATTGCATACGAGGGGCTATCTTTCATAATTCCAAGCTCAACCAATGATGGGAGCCTATCTGTGGCCATAGCTCTTCAGCCTGACCATATGAAGCTGTTTAAGGATTTCTTGTATGACATTTGAAGAATCATTGCCTTCAAGCCATATGGAACGCCACAATGTTTCTAGGTGGGGTTTTCTTTCCCCTCG…
Gma.1137.1.S1_x_at	BF067710	At5g48930	0	Metabolism			GAACTGCAACCCGATCTAAAAGCGCTGGTTCGTGGGGCTCATACTTTCAAGTGTCCAAACCTTGGTATCACTAGCTGGACTAGGCTTCCAATCCATGATGCTGACTTTGGTTGGGGAAGGCCAATATTCATGGGACCTGGTGGAATTGCATACGAGGGGCTATCTTTCATAATTCCAAGCTCAACCAATGATGGGAGCCTATCTGTGGCCATAGCTCTTCAGCCTGACCATATGAAGCTGTTTAAGGATTTCTTGTATGACATTTGAAGAATCATTGCCTTCAAGCCATATGGAACGCCACAATGTTTCTAGGTGGGGTTTTCTTTCCCCTCGTACCTTTGTTATCTGTCGATGCTTTTGACAAACGGTATGCAACTGTTAATGGGACTCCTTTCAGTT…
Gma.11933.1.S1_s_at	BU082906		0	No Homology to Known Proteins			TTTTCGGGTTCGAGAAGGCACTTGTNTTGTTTNTCGTACGAAATGGAGACTAAACNGAGTTCGGTGANGGTTACGCTCAGTTACGGCGCGTTGACGTGCGCCGCGGAANTTCTCGCGACTTTGCTAGCTTCTGCTGTCGTCAAAGCCNCGCTTTTGGCCCCGGATCTCTACCGGCTGCTATTGANCAACACGCCTACNNCCAAAGGAGAGAGNAAAANTCAGAGTNAAGACAAGCAACGTGATGCAGAGGG
Gma.11237.1.S1_a_at	BU548971		0	No Homology to Known Proteins			GGAGTTTAAGCCCAATCCACTAATCTTTAGGAGGGATAGTGTTTTAATTTCCCGCTTAGCATAAGTAGTACATTTCATCATCATCTTGAGGACTACGTCAATGGATGTGGAACTCAAAACACTTGCATGGAACCCTGGGAGATATTTTGGTTCCCTTGGGTACTTCACTTACTCACCAACCATGGTTAGGACATAGGTGAATCTCATCACTCTCTATCTCTCTTCTCCCTGCTTTCTGTCTGCCAACTTTTACATCGAGATGGACCTTGATACTCTATTAATTATATGTTTAATTAAGCCTATATGGTTTGGATTGTAATTAGGAATACTAAAGTAGGAGGATTTCATTCTCTGTCCATGCTGGATGAGAATGGATTTGCTACTCATTCTACTATGCCT…
Gma.11211.1.S1_s_at	AI442578		0	No Homology to Known Proteins			ATGGCCTCCGTTCAGTGCCACAAAACCTGCAAAGTGAGCTGCCAACAGGAAAACCAGCACGCCTCGTTTGGGCAGAAAGTTTCTGACTTGTTCAAAGGGCATCAACATAATGACCACAGCTCCAATTATGCCACCCAAACCAAAGTGCTTTCCCAGTCAGGGTCAGGGTTAGGCCCCTTCACCACCAAAACTCAAACACAATGCGGTTGCCCCCAAACACATCTCAGTACCACTCATGGCTCCAACACAAAAGGCCATGGCCATGGCCAAGGGAGAATTAAGAGGGAGCACAAGAGAGGGATGCTGCAGAACATCAAGGATCGCTTATCAGGTGACACCAGCAGCGACAGCNNNNNNNNNGAGAGCGACAACGAAACTTGCCACAAG
Gma.11229.1.S1_s_at	AI443813		0	No Homology to Known Proteins			AGGGTACTCAAAGATTTTTGCAACGCTTGGANTTGTATGCAAGTGTTGTGATGGGGTTGGAGGNGCCTGCACTAGTANATGGACAGAATCTTGCAATAACNTNCANTGTTTNCCTTGGAAATCACACTAGTTAATTATTTTCTGTATCTTTCCTTGT
Gma.11054.1.A1_s_at	BI970377		0	No Homology to Known Proteins			AGGTTGTCAGTCTCATTTGTCTTGCTTCTTATAGAGTGCAAGGCATAATTTTTCACAATTTTGTAATAATAGTATGATATGGTTGAACATAATCTGCTGTACTTGTAATGGTTTTAGGTCATATAGTAATAGATCAAAGGATTTGGTCAGTTATGTTCACAAAATCCCTGTATTCTCGTTACTTGTATCATAGCC
Gma.11007.1.S1_a_at	CA850791		0	No Homology to Known Proteins			CTTGTCTAATAAGGGTATTTGTGTCCTCCGAGACAGCAAAATTTTATTTATGTATGTGATGGAATTTGTATCTTGTTGATCTTTTTTTAACTTTGGATAGGGAATCAATCACATGGA
Gma.11007.1.S1_at	CA850791		0	No Homology to Known Proteins			TCTCTGATTGAAGTTATGGATTTGGGCTTATCCTCTCTGTCCTTTGTCATTTTCTTTACTAATTTAATTTTGTACTTGTCTAATAAGGGTATTTGTGTCCTCCGAGACAGCAAAATTTTATTTATGTATGTGATGGAATTTGTATCTTGTTGATCTTTTTTTAACTTTGGATAGGGAATCAATCACATGGACCATTGTTGCAATTAGAAACCATAACCCCTCCTAAGTTTTATCGTTNTCAATCAAGAATTTGATCAGTTATTAGTAT
Gma.11007.1.S1_x_at	CA850791		0	No Homology to Known Proteins			TCTCTGATTGAAGTTATGGATTTGGGCTTATCCTCTCTGTCCTTTGTCATTTTCTTTACTAATTTAATTTTGTACTTGTCTAATAAGGGTATTTGTGTCCTCCGAGACAGCAAAATTTTATTTATGTATGTGATGGAATTTGTATCTTGTTGATCTTTTTTTAACTTTGGATAGGGAATCAATCACATGGACCATTGTTGCAATTAGAAACCATAACCCCTCCTAAGTTTTATCGTTNTCAATCAAGAATTTGATCAGTTATTAGTAT
Gma.10626.1.S1_at	BE821063		0	No Homology to Known Proteins			TTTATCATTTCTTGCCTGTGGACTGTAGTGATTGAACAAATAAAAGTGACCTGTCCTGGGATACTGACAGGTGACAATTATCAGCACTGTTTATCACTCCAGCCTGCCTATATTGGAGGATTGAAAGTGATTTTCCCTTTATTTGAATCGGGAAAGTAAACTCTCCCCAGCCTTGATGATGTTTTTTNGCTTCTGTATTCCAGGCAAATGTAAGTTTGTATCCTGATATTTAAATGCCGGAGGTTTGTAATTTGTAAGCATATCTTAGTTTCTATTCTTTTGACATTTTGTATCACACCTTATAGATCATT
Gma.10888.2.A1_at	AI748644		0	No Homology to Known Proteins			TTCACTTGAGTTCTCTTGATGTTGTTGTGATTCGTGAAGGCTGTGAAAATGCATGTGTGTCCATTGGGTACGT
Gma.10850.1.S1_at	BI788127		0	No Homology to Known Proteins			GAACCTTCGTAGCCATGGCCTTGGTGGCTTAAGATCTTTCATGAGAACAATTGTCTTTGATTCGTCCCACGTGGTGGCATTTCCGCCCTTGATCTTTCTTTT
Gma.10920.1.S1_at	BQ612383		0	No Homology to Known Proteins			GTGACTGGATGTACATCGAACCCGAATATACCTTGCTATCCGCCACCAAAACGAGCATGTCCTATATATATTCGTAATTGCTGACGAAAATTATATGTTTCTGGACTCTAAAGTTTCACTCAAATCGAGGGGAGAAGCAATTAATGTCATGCTGCTATATATATATATATATAGTTTTTATTTGGTGCCTCATCTTTTTAACACTATTCCTGTGTTAAAACTCGGTGGTGTCACATCTTTGCTTTAAAATTCCGTGTTCTTTTCCAGTTTGCAGTTGCAATAATCTTCTAATGTTGTACTGAGGCAAAGGCTTGCCCTTTTAGCCACTCAATAAATA
Gma.10921.1.S1_s_at	BQ611250		0	No Homology to Known Proteins			GATTGTTTGAACGTGTGCAAATGTATGCATCAGTAGCTTTGGTTTTTTATTTTTTATTTTTATGTTTAATTATTNACCAAGTTTTAAGGAGTTTGTTGTTAGGTTGTCTGATTGTTATGTGTGAGTAACTTAGCAGCTTAAGCTTAGTTGCTGAAGTTTAGCTAGT
Gma.10969.4.S1_at	BG508006		0	No Homology to Known Proteins			TGGAAAGTTTTTTGCTTAAAGAGAGTGTTGCCTCGTGCCGAATTCGGCACGAGGGATAATTTTAGGTTTGGAATATGCGTTGTGGTTTGAGCATCTGTTACTGTTATGGTTGGGTTTTTGACATCTGATAATGAATCTGTGTACTGGAAGGATTACTGGGTCTTGGTCATCCAGATTGAAATACCTGAAAATCCTTGCTACCTATAAAA
Gma.16828.1.S1_s_at	AF047051.1		0	No Homology to Known Proteins			GTTGGATTCAAGTAGTTTATGTTCGTCTTATGTTATTAGCTCAAAACAATGTTGTTACTGCTTTTG
Gma.16829.1.S1_x_at	AF047049.1		0	No Homology to Known Proteins			GTATTATTGAATTTCTCCGGAATCTTCTTCTGTGTATGGTTTTCCTTCCTTTGTGTTTTCTTTCCTGTTGAATCGGTGGCCGTTGATCTTTGGT
Gma.16832.1.S1_s_at	L22029.1		0	No Homology to Known Proteins			ACTACTAGATAGTGGTTTTGCTTAGCTTCCCGAGTAGTTATTAATGAAGAATATAAGCCAATAAAGAACGTTGTTGATAGCAGGAAGATGCACTTCGCAATTACACAAGGAAAACAACGGAAGCAAAGTTTCCGCGCATTTTGTCACATAAGAAGAAAGAAGTGTCCATCCTTTTCTTCTTCGTTTGTATTGTTTATGAATTTTTATTATTGTGTTTTTAGACAGTTGTATGGCACTATATCACATGAATGCATTTTGGTTTGTAACCTGCTACGTTTGCAAGGG
Gma.16421.1.S1_at	BI969187		0	No Homology to Known Proteins			TGGTTTTGGAGTTCATTCATATTTAATAAATCTACCTAAGTTTTTCTTAATTTTGTATTTTGGCANNNTNNGNCNNNTNNNGNNNNNCNCCAATGATGATAAATCCTAAGGCTTGTTTCTCTAAACATTCGCAGTGGCCGCCCAAGAGCTTTCGCCTTCGCCAGGCTAGAGAGCTAATGCTGCTATTATCCTTCCTTGGATGTCTGAGGTCAAATTATATCATAAGTTTGACTATTTTCTCATTTCAGGCTAGCACCTGTGTCCTTGGTACGATTTTGTTACACATGGCTAAATGAAGATGGTGTTTTCGTCACTCATATTTTTGTATCCACTGGAATTAGTCTGTTCCCGCATAGTTGACAAATAAATACTATGTATAGATGGAATGGATCCTGAATC…
Gma.16606.2.S1_a_at	AW396382		0	No Homology to Known Proteins			GGATTCTAATTCTATGTTTTAGCCTCTCGGGGGTGTCGTCGTCTTTTTACCCAGGAAAGGGGGNNNNGNNGAAAAGGCGAATGCAGTAGTAGTGAACCGAAATGGACATCGAGGAGTTGTTGTCGATGATTCGGGTACATGTGCTGCCTGTTGTATTGCTCGTGGCTGATGTTGTTGCTATGTTGGCGTGATTGTGAATATGCTTGCAAATTGATTGGTGTGGCTCATGGTCATTCGTGGCTGCGTTT
Gma.16644.1.S1_at	BM094345		0	No Homology to Known Proteins			AATCAAGCCTCATCATCGATGCAGTTCCTCATCCTCGAACAAGTTCAGTTCTTGAAGGTGAACGACGATTCCCTCTTGCAGTGGGAACTCGTCGACGTCGTTGACGCCGAAGAGGAGATAGATGGCTTTGGTTCTTCGGATTCTTCCGTTTCTTGGTTCNAANTCCGATTCTTCTCCCTGCGATGCCCCAATTGAAGAAATTCGACACCTTCTTCTTCATCCCGATGTTGGTTTACAAGATCGACATGATGGTGTTGATGAATCGGAGCAAGATTCNGGTTTGGAAAATCATCATCACTACCATTATCACCATGATGAT
Gma.15638.1.S1_at	CA802038		0	No Homology to Known Proteins			CCTCATTAGGGTCTTTGGTCTATTTTTATTCGAATTATGGCGTGAACTTTGGATGATTTGAGTTTAAGCTTCAAGGCTTTAGTATGTTTTGGTTTAGTATATGATTTGAATCATGGCTTGAATTTTGGATTAATATATATGATCTGGCTTCTATATGGTGCTATTCCTGCTA
Gma.15564.3.S1_s_at	AW185750		0	No Homology to Known Proteins			CTTACCACTATTAGCTAGCATAGCTCTATGGATATGAA
Gma.15575.1.S1_at	BU765551		0	No Homology to Known Proteins			AACAATCAAATGCTTCCGAAATCTGAAACAAGTTCTAAAGAAAACATGGAGCCTAGCAAGGAGGAGTTCCATCTATGGAACTTGAATGGGGAGTCCAAAGCACTTTTGGATTGTGGTGAAGAGGATTCCAAGCTTGGAATCATCAGAACAGAAGATGATCACCCCTTCAGTTCAGCAGAAATGCATGCCACTGCCTCTTTGCTTTCGGCTTGCTAGAGACGGAAATACTAGTATACTACAAGGGTGTTGAAGCAATTTGAAGATTNAAATGAACCCACCAAGTTCAAGTTGTTAGCAAATATTGCATTTTCAATTCAGAAGAGCATAGTCTAAAGAACGTCTTATGGTACATGTATTCATATTTGATGGATATGGGCAACCATTATGTTACTGCTANAA…
Gma.15543.1.S1_s_at	L22030.1		0	No Homology to Known Proteins			TGAAAGCACCATTCATGATGAATCATGTTCTAGTTTTCATCGAGGAATAAAGGCAAGCTCTATTTTGAGCCAAGTGAAACATCTATCTTCCTGTCTAAGTTCTTTGAATAAAAGTCTGAATGTGTCATCTCTATGCTACAATGTTTATGATTCAGATCAGGTTGATTCTATTTGTTTGA
Gma.15882.1.S1_at	BQ452888		0	No Homology to Known Proteins			TCAAAAATTTCAGCTCGGATCGATAATGATATGCGGAGTGATTATTCGCAGAAATCGACAGTAACACGGTTTTCTGCCAGGGTTACAAATGATACCCTCAGTAGTTCGTCACACATGTCATCAGTATCCCGTGGCTATGGCTCTCGGGTGAACTTTGACATCACCAGCTTCGCATCATCCCGGGGAATTGCCCCTCCTGGCTGGACTTCGCGAGTCCATTNGGCTATCCGAAGCAATACTTCGGCAACTTGATTCATGGACGCATGTCCATAACATATATAAGGAAGCCACTTCTGGGAGAAAGTACTGTT
Gma.12892.1.A1_at	CD394551		0	No Homology to Known Proteins			GCAATAGCATGAGAATATGAGATCATGGATTTTGAAAGGACCCAATGGAAGCCNATTTATTATGTCTTTTTGGNTTGTCTTTTGGGAAGTACGTATGTGTATGTATGGGTTTGGTTTTATATATGTAGTATCCTGATCAAGTTTCNANTTGTTTTTTCTTCTTTGTTGAGATATTGTAATGTACTGATGCTATCCTTTCACCAACTTGAATGTACAAGTGATCTTGTTACTGATCCTATCCTTTGTTGAATCAATG
Gma.1295.1.S1_at	CD397377		0	No Homology to Known Proteins			AGTTTCAGCAAAATTCACCAATGGCTTTCTCCAAAGCATTGTTCCTCGCCGTCGTAATGTCGGTGTTCGTCGCCGTCATCTCCGCCGCTGAAGCTCCGGCTCCGAGCCCTACCTCTCCCGCTGCCGCCGTGTCGCCGTCATTCGTCGCCGGTGTTCTCGCCGCCGGAGCCGCTCTCGCGTTCGGATCTACACTCCGGATCTGAGCGTAGCTCATGGATTTTATTTGTGGATTTTTAGTAGAAGCCGAGATTTGAGTAGCATTAGTATATAATTCTCTCTATTGATATTGCTATGTAGCGATTATTGCTAGATATGTTGATTTCTGGATCTATATTGCTTTTATGGTTTGACTAGTATTCTTATTGTTGTTATCATTGGTTCTAGTACAT
Gma.11500.1.S1_at	BE058294		0	No Homology to Known Proteins			ATTCTAAGCTTTACGTATTCGGATTTATAGCCTTTTGTATTTTCTGTATTCGATTGAACTTTCTTCACTTATTCTCTTTGTATTGCTGCCTTGGGAGAACCAGATTAATGCACAG
Gma.1209.1.S1_at	BQ629459		0	No Homology to Known Proteins			AGAAATGATCACTAGCAGGGCTAAAGCACCCTTCCCTTTAGAGAGAGAAATTGTGACAACTTTGGCTAAAGGGGGGGCCCTGCCCTTGTCCATTTTTATACTTGACGGATGGCACAGTAATGTAACAACACGCTTGTGGGAAAACACTGATTTTCGTGTGTTTTAGTGCTATTGTTATTATGGGCCTTCCCTTGGAGGGTGTATGGACTTGTTACAGAAGAAGGGAAGGGTGATATCTTGGTCGGATGTAATTTAATGTGGTTGGTGCTACTGTTGTCTTTTTGCCTATGTAGTTACGTCGCATGCACGCATTTA
Gma.13580.3.S1_at	BI973761		0	No Homology to Known Proteins			TACACCACCCTGCATAGTTTGTTCAGCTATAATACTACTTGAGCTTCTTTACCTACTTTTCAAACCTACATTGCACACAAAATGGCAACATCTTGGTCATGTTATCTACTTGCATTGCTTCTTTTTATGTCAACTATTGTATCAGAGAGTAGAGTGGCAAGGAAGGACTTGGGCCTGGACCTTGGTGGGTTGGGGGTTGGACTTGGACTGGGTTTGGGCCTGGGNATAGGAGGTGGCAGTGGCTCTGGAGCTGGTGCCGGAGCAGGGTCTGGTTCTGGTTCTGGTTCTGGTTCTAGTTCCAGTTCTGCCTCAAGTTCAGCTTCCTCATCTTCCAGT
Gma.13218.1.A1_s_at	CD391892		0	No Homology to Known Proteins			TTTACCAATATATGGCAATGGAGCCTTTTCAGTTTATCAAGTACTTTTATTGCTGAGAAAAAAAAGTACTTTAATTGATGTGTTTGCGATTTCAGTGTATCATTAGTATGTACTTACTAGTAGAAAAACTGAAGATATGCTGTTGCATTGTGTTGT
Gma.13298.1.S1_s_at	CD395877		0	No Homology to Known Proteins			TTCTGGTGGTGATCGCCATCGGGTTGTTATTCGGGTTCGGAGTGTTCAAGCATGGATTCCACAAGATCAAAGACACTGTCAGTTTCTGCGATTCTTGCGGCGGCGGCGCCGCCGGCGGAGGAAGACCCTTCATCGGTTATGCACCGCCGCCATTGTTCTAGTTCACCATTCTCTTGTTCTATTTCGCTCTTGTTAATTGTTCTGGGGATTTGTTTNGTTTCTTTNTATAAATTAGTATTCGTTAGGGTTCATATTTGTAATTACCTGCTTCTTG
Gma.14471.1.S1_s_at	CF921241		0	No Homology to Known Proteins			GAGCATAAGGGTGAGCACCATGCTGGAGAATACA
Gma.13983.1.A1_at	AW101913		0	No Homology to Known Proteins			TTTTTCACCTTGGAATTCATCAATGTCTTCGAAAGTAGGTTGTCTGTAGCAAAGGAGTGATTGTGAATGCTTATTTTATTTTCTATGTATCCTTTTTCAGAGTTCACATTTTTTTTGNCNNNCGNNNNATTAATGTGAATGTCTATAGCTACATGTATCGAGAATTTTATATAAGATTGTCAGTTCGCACTCAAATTATCAAATTTTAGTTTATTCATGAATCACTTGCCCGATATTTGAGTGTGCTATAGGCATGAAGACACACTTAAAAGTTGTAATGGTGAGGATACCTGCACGATCCCTGGTTT
Gma.14945.1.S1_at	BG157566		0	No Homology to Known Proteins			GCAGATTCCACCTCCAGTGGTGGTGCTGCCACCGCATCTGATCCATTTGCTTCTGCTGGTGGAGCTGATGAAGATGATCTTTACAGTTAGGTCAACTTGAATGGTAGTAAATGCCGTGCTATCTTAGTTATGTACTTCTCATTTTGTGTATGCAAATGAGGTCTCTAAAGGCTTCCTTTGGATTATTGTTGTCATTGTTTTGCAAACGGCAT
Gma.1543.2.S1_at	BG507578		0	No Homology to Known Proteins			TTACATTTGCGGTTGTTAGGGCCATGTTGATGGAACACCGCCGAATTATGTATCTTTATCACAGTCGTGCTTTTCGGAAAGGAAAAGGATAACTTAGAGTGAAAACTTTTACAGTTGATATATGTAGTTTGGGATTCTGTTATGAAATATTTGTTTTCGTTGGGTATGACTATGAAATGTGGCTGAAGAAACCGAAGTCTGCTTGTATTATGCACTCCGGCTTCCTTTCATTGGATTTAATCATTTGTTTATTCAAGTATTCAACAAGTGGGTTTGGAAGTGGGAACCATGATCTCATCTATGCATGCACACAACACAAAGAAAGCATGGGCTGCATTGTAGGAGGCTGCAGAATTCACCCATTGTTGCTTTGTGCTTTGGTTAAAACT
Gma.13643.1.A1_at	CD402512		0	No Homology to Known Proteins			GCTTAATTACTTTCCGTTGTGATCAATTGTTGTACCGATGGGTGTTTATGAAAGTGGAGCTTCGGGAAAGATGGGCACTCGTCATGTGCTGCAACTCGATTTGTCGCAACAAGAGGAGAAGAAGATACCTTGATGAAACCCCATCAGGATGTGAACCAAGGCCACTGCTCAAACTCTTCGATATGCGCTAGCTAGGCAATCCCTTTACTTAATCTGATAATTGATCTCTTGCTACCAGATCTGCCCTTACGGATCTGTTGAA
Gma.17258.1.S1_s_at	BG509247		0	No Homology to Known Proteins			CGTTCTGAACAGAAGCTATATATATGTAGCTGCTTCATGAAGATGCAGAAGATCATATACGTGCATTCTTAGTTTGCATATAGTCCAAAATTGTCACATACCATTCCCTTATTCTTTTATTCCTGTGTA
Gma.16977.1.A1_s_at	BE821395		0	No Homology to Known Proteins			TGTGCAGTTTGACAATCTACCAAGTTGTGCTT
Gma.16950.1.S1_at	BQ454216		0	No Homology to Known Proteins			AGGCTTTGATTGGTGTTAGGCTTTCAACAAGGTGAATATTTCAACCATTAAGAGGCGCAGGTCGTTTTTGAATGGCCTTAACATGCCACCTACTTCTGCTGATGTGATAATATTCATGCTACCTTTCCTTGGTGGCATGGTAAACATTCCTCTAGTTGGCCGAATCTTCTTTTCTTGGTTCTCTGCGGTATTGAAGCATTTTGGAACTTCACATTGCATTCATCTTCTATAAATTGCATGTTTAGGAATTCAAATTACAATGGAGACGGATTGTCAGTTCTAGGGATTCA
Gma.17798.2.S1_at	CD412748		0	No Homology to Known Proteins			AAGATACGGCAGTTGTTGTTACCACTTCCTTAGGTGGCACCCTCAGAAATAAAAAAATATGCTCCATATTTTATGTAGTTGCAATACCTGTGCCCTGTCACTGAGGCCGGTGTTGGGAACTACTGCTTTATCTTGTATAGGATGAAAAATGTGTCAAAAAGCAAGTAATAATATAACATAGAGTGGGGAGTACTTTATGTTGGTATGTGATGCTAA
Gma.17888.1.S1_at	BQ473851		0	No Homology to Known Proteins			TACACCAAGATCCTAAAAAGCACTACAAATACCAAAATCTTCCACCATCAAATTACAAGAACAAATCACCATCCTCACCATACAAGTACCCATCATGCTGCACCACCACCTTACAAGTACCCATCTCCTCCACCACCACACTGTACAAGATACACCATCTACATGCACGCCCAGTGTACAAGTANNNNNCTCCTCCTNCANCAGATTACAAGTACAAGTCACCTNCNCCTNCATACAAGTACCCTTCACCTCCACCAACACCTAAGAAACCATACAAGTATTCATCTCCACCTCCCCCATACCACTACTAAATAGTGATTTAGTATATCATCCCATGGATCTGATGAAGAACGTGTGCAAATAAAGGAGATTGATATGGACGGAAGAAACACTGAAGCA…
Gma.17894.1.S1_s_at	CD393748		0	No Homology to Known Proteins			TCGGTTGTGCTGTCATTGATGGCTATCTTGAAGCATTGAATTCGTTAATTTCGTTGGGTTTGTACAAAATTGATTCGTTTTATATACAGAGTGGTGATTATGAGCTTTGGTATCTATACTTATAGGTATACCGGAGAGAGATTATACAGTATTTAATATACTTATTGTTATTTGTTTTAGGACTTAGGGAGAATAAGAAGGATTTTATCCTTTACATTGGACCCGTATTCTTTTTCAAT
Gma.17678.1.S1_at	CA803049		0	No Homology to Known Proteins			GAATTTTAGTTGAGTACACATTTAATCATTGTTGTCAGAGATTTTTTAAAGTTGAGCATGTTGCTTCCTAGGTTTGGTTGATTATTGTTTTTTATAATTCGGTTCTCCCTTTCGGCTACTCTTAAGCATGAATGAATTATAAATCTATTCGTTGTTCGTCA
Gma.17607.1.S1_s_at	BE658397		0	No Homology to Known Proteins			AGTTGTAAAGCACTCTGCGCTCTCTCTGCATGATCATG
Gma.17607.2.S1_s_at	AW201640		0	No Homology to Known Proteins			ACCACCAGTTCACCCTCCCTACATTCCACACCCAGTTTACCACTCTCCTCCACCACCACCTTACAAGAAGCCTTACATCTATGCATCACCTCCCCCTCCTTACCACTATTAGCATACCTCTTATCGATATGAA
Gma.1877.1.S1_at	BG791149		0	No Homology to Known Proteins			ATTATTAATCGATGGTTGTCACTTTGATGTTGTGTTCTGTGTTTGTATGTGTATACTATCTAGTAATGCGTTTGAACTGCCAAGGACAAGAGTACTTTTATTGATAATAAAGAAACGAAAACGTTTCAATTGCGTTGGCT
Gma.18044.1.S1_a_at	AW757140		0	No Homology to Known Proteins			TGAGAAATGAGCCTGACCACTATATATCCTCCATGGATCGATGACTGAAATAAAATATATATAGTAGTTTGTTTTTCTCTAGCCTTTGCGGATGATGCTGTATCCATTTTTGTTTATGTTAATTTTGTGCATATATATAGTATATAGTATATAGCATATGTATGAATATGTTTACGAGTTCATCAGTTGAGCGATTGAAGTCCTGAAACGATCGAGGTAGCTGTGTGTGGTTTAACAGCTTGGTCTTGTTTTAT
Gma.3492.1.S1_at	BE347724		0	No Homology to Known Proteins			TCTCGACAAGCCCAACAGCAGTAATTTTGGTAGATGAATCTCTTGCTGGATCTTAAACTTCAACTTGAGGATCCCTGGCTTTTAAAAGTCTTAAATCATGAGGTCACAATGAATTCTTCCAGCAGCAATGGAGTGGCTCAAAGATCAATGTCAATACACAATGGGACTGGTTGGGTTGCTTGAATCCCAGTAGTTTGCAGTACCCGCTTTCCTAGTTTATAATAAGTAGTATGGTTGAAGAGATACTAGATGCTACTTTCTATTTAGTATTNGTTTCTGCGTGTAGCTTTAATTTGCTTGCTTATGATTTTAGTTGATCTGGATTTGTNNGTTCTTGNAGCATTTAAGCTATAGTATCATATTTCACCTTAT
Gma.2921.1.A1_s_at	CD417900		0	No Homology to Known Proteins			AGTGGAGATGATGTGCTTTTCCATCTGCTACCAGCTTCATGACATTTTATGCTGTCATGGCTCTTATGATGATCTTGAGGTCTAGTGGCGAGGGGAGCTTCCATCTTGACTTTAGTTTAGCTTTACTGGTCTAAAGATTGCTGTTTTAGTGTGGGTTAAGTTATGATATTGAGAGTTTTGTGTTATCTAATTATGTACTGGTACGTTTTGTATACTTTTTGGTTTATCTTAATAGCT
Gma.3102.1.S1_at	BG839165		0	No Homology to Known Proteins			TTTCCTCAATCCTAGTCTCCTTTAGGTTGTTTGTTAGTGTTTTTTGCTTCATTGTTTTTCGATCTTATTTGAAAGTAGCTTTTAAAGCACATCACGTTGATTAGAAGCATGTTTCTTGAAAAGGGGATAAATATACTATGTTTGGGTACCTTGTGGAAATGTTATCATGTTTGGTATAGAGCTATTGCACTACTTTACTTTGGATCGGCAGAAATGTTGAGGCTCAAGTTCCTGGTACTATCTTCTGGCACTCAAGAAAAGAGTTAGCTGAATGTTTTGGTGGGGCTGAATTCTGTATGTTTTCAAGTCGGTTTTAAAANTCGGTTTATTTTCAAGGCTGTAGCTTCCAATTTTTATTATCTTTACTGTCACCTTAAGATAAGTTAAACCCTTTGAAGT…
Gma.2590.2.S1_at	CD414388		0	No Homology to Known Proteins			ATTTCATATTAGCTGCCTGCTGCGACTTCCTTATGCATAATTTTACTGTTTATAGAAATTGTGAAGCTATACTGTTGTAATTGTCATGTANATTGTTCCCTTTTTCATCTTACTTGATTTGGTAAACTCCGGTTACTTGTATCCAAATAAGATGGGCCATTTGTATTGCGGGGGCTTTGTATAATTGTACAATTATCTACTTGTAAGAAGTTCAGATTCGGGCGACAACATTTGTAATGCAGAATTAGGTCATTAACATTGTAAATCTTCTGGCGATGATTGGAATATCAATGTGAAGACGCTATATGACTTCTGCTATGACAATATCATTGTGGTTGTCAAGGTATTTTTGAAGAAATATCGTGGATTTACAAAGAATCTGGTTAGGCTTCTACAATT…
Gma.2540.2.S1_s_at	BI787366		0	No Homology to Known Proteins			AGAGGAGCACAAAGGAGAACACCATGGTGAGCACAAAGGTGAACACAAAGGAGAACAACACCATGGGGAGCACAAGGAGGGACTTGTGGATAAGATCAAGGACAAGATCCATGGTGATGGCCATGACAAGGGTGAGAAAAAGAAGAAGAAGGACAAGAAGAAGAAGGAGCATGGACATGACCATCATGGTCATAGCAGCAGCAGTGACAGTGATTAGATCTTATATGTTAAGCAGGTGTACGGTA
Gma.4176.1.S1_at	BG046696		0	No Homology to Known Proteins			AAACCACCTCATCCTGTACATGGTGCCGGGGAGGAACCAACCTCCATTCCACGAAAGAAGGGACCAAGAAGGCCNCCGAACTGATGAGTGAGTCAAAGGTTTCNGATTGNNCNNNCNTCAAATGGTTTAACTTTGACTCGATCTCTACCACCACAACATCACGATATGTTGTTACAANCATAATCGCAATTTGAAACCTTGGGCTAGCTAAAACTATTTTAATATAAAGTATTAATGGTCACTGCTACATGAGCGTCTATGATTAAATAAAAAGTAGGGAGTTTGAACCCATGTAATACCATGTTGTGAGGTTCTCCCTCTNTGTGTGTGCTTTAAATTTTCACATNTAGTTTGATTTGTGTCCGGTGTGGTCTCTGTTTCTTG
Gma.4110.1.S1_at	BU084188		0	No Homology to Known Proteins			GGAACATAATTCTCTGAGTGGCATGAAGCAGAGAAGCTATGGCCACATCTTAGCAAACCGGCAAGTCACAAAAAGGCAATGGACTCTCTCTCATTAAAGGGTCCTTATGGCTATGTATGTATTGATTCTATTGTAGTTCTTCTTCTTTGTTTCGGTAGAATGTATTAATAAACAAAGATGTTCTTCCTTTGAGAAGCTACATACCAACTTGTGTTGTCCATAACACTCAATTTGCAGATGACTAGAATCAGGCTTTCTCTTCAGTTTCTGCAAATGAGTAGGTAGGTAATTATGACCTTATATCATATCCCATGTGTGTTAGTGTGTATGCTTGCTATGTTGTGACCTTA
Gma.4111.4.A1_a_at	BI426730		0	No Homology to Known Proteins			CTTAGAACCCATAGTCTTGCGATCAAGAATTTTCATTTTTGTTGTTTCATGCCATCAGCTTATAATCCTGGAGTTTGAGCCCCCCCCTTTTGGTTGAAATAATTAAGACTCGTTTGGATTGCTCATGCGTGGTTGAAATTTGATTGTCTAGT
Gma.4111.4.A1_x_at	BI426730		0	No Homology to Known Proteins			GATGACGACAATTTCCTGGGATAATCATGCCGATTGCCTTGTCATTTGAATAATTATGGATGAGAAATATTGGTATTGATATTTTCCCAAATTTAGGACCTTGATACTTAGAACCCATAGTCTTGCGATCAAGAATTTTCATTTTTGTTGTTTCATGCCATCAGCTTATAATCCTGGAGTTTGAGCCCCCCCCTTTTGGTTGAAATAATTAAGACTCGTTTGGATTGCTCATGCGTGGTTGAAATTTGATTGTCTAGTGAAAGTTTTGTTATATTTAAGCTATTTTAATGGTTATGCAAATCTTGATTATATGTCGGTTAAATATTGATTCGGTGCAGGATTTTAAAA
Gma.4346.1.S1_s_at	AW309773		0	No Homology to Known Proteins			TTGGAGCAAAGTTAAGCCTTTAATTTGTTGTACAAGTTCTTTGAATAAGAGTTTGAATATATCGTCTCTAAGCTACAATCTTCACGACTCAAATGAGGTTGCTTCGATTTATTTGGTAGCCATCTTTCACATCTTGTTG
Gma.3993.1.S1_at	BG510822		0	No Homology to Known Proteins			TGGGAAATTCAAACATCATGGCAAGTTCAAGCATGGAAAGTTCGGCAAGCATGGGAAATTTAAGCATGGGAAGTTNGGCAAGGGTATGTTCAAGAAGNGGAAGTGATGATATTATATTAATTTTCTGTACATACAAACCGCGATTCTGGATGCTGCTGCACATTGCTTTTATAATAAACTCTACTTTGTTTGATGTCCATCTATATTTTGGTGGAACTCTAGTATTTTTTTTTATAGTCAAAGATGTATCATCCCGTTCATATTCTATTATTCTAGAAAGTGCTTATTCTAGAAAGTGAACGTCAAATAGATGATGCTCTGGATATTATGTGCGAGCTTGCAGTTGCTTTAGAAAANNANNNANTTGTTCATGCCTTTTCTGTTTNNNNGCTTTGTATA…
Gma.3707.1.S1_at	AW317215		0	No Homology to Known Proteins			AATCTCTATGGACTTCAACCTGGTGAGCATTTCTGGCAAGTTATCTTGATCAGCTGGACATGGATGGGAACAACGTTATCTAGGTCCATCTTAAGCGTCTTTCTTCCCTTATTTTCTTAAGAGTCAGATATCTCGTTTTTGTTGCTTACTTTGAGGTGATTGTATTAAACCAAATTGAGATATTCATACAGCATGTAAATCTGTGAATTGTTGCAAGTCGGGACAACAGTTTGAGACTTATGTGGGAATTCATATCAAGTGGTTTAGTTCTGGACGAAA
Gma.3714.1.S1_at	BG156642		0	No Homology to Known Proteins			AGGGTTGATTGATGTTTTGCTGCCATTGTAATATGTAGCTTTTAGTTGCACCTGTACTTGGTTCTTTTGGGGATATNTGGGAGNTTGATGTATTATATATAAAATGTGCCATGGATAGCTTATGTGGCAATGAGAGTACAGATGGCTGTAAATAACTGCATGTAGTGTAGCTTCAAGATTCCTTCCAGTTTTCTGTTTTGGATCATCATCAGATTTGGCCTTTTTTCAAGAATTGTGCAACTGTATTACATATTCGTTGAGTTTAGATGTCTGAAGAAGGAGCGAGATATCTGCCAGATGATGAAATAATGCATCCTTATGTTTCGCAAAGAAGCAGGGAAGGACATTATGACTCTCTGCTTGAGGTTTATGTTAATTGTCCTTCACTTGAAGGAAATT…
Gma.5036.1.A1_at	BM526476		0	No Homology to Known Proteins			GGGTGATGACCAATCTTTCTGCTAACTTGGCAGAAAAGATGCGGTTTCGTACAGGAGGAGAANCAGGGTGAAATGGGGGGAAGGAGCAAGAAAGGAGATATCCCATGATATCTGCCAATACCGTAACTATTGGGCTTGCATGAGTTATTGAATGTTTTGGAGTCTATGGTGGTGGTCCAGATATTATGTCCTTTACTATTTTTTTTTCCTTTTACTANNGGCNGTAGAGTGAAACAATCATCTTAGTCCATCCATGTGTTTGGGACAAGGTAATGCAACATATTTTAGCCGT
Gma.4808.1.A1_at	AW317160		0	No Homology to Known Proteins			TTGTCACAAGTTTTCTCCGATTCCATTCCAACCTCAACAACAACAGACACACCCCATCCACTTCGATCATCATCATCTCCCATTAATCTCTTCATAATCCCATATGTTCCACTTCCTAATCCCACAATTGCACACAACCTCGTTCTAATCTCAAACTTTTCAACCCTGGGTACTCTCTCTCCTTCCAATATTCCTTAGCANCNCATTTATAAAAACCATCCAATTATGTAACTCTACCCTTTNTAGTAGCATATAAACTCCCCCCAAAAAAAAACCAAAAAAAAGACTTTTTTTTTATCTTCATCTTTCNAACCTCAAAGTTTTCAAACCTGGGTTCCCTATCTCCTTCCAATATTCCNNNNCNNNNNATTNNNNNANNNCNNCCNNNTATGTAACTAT…
Gma.4496.1.A1_at	BF219518		0	No Homology to Known Proteins			GGAATCAAGCTAATATAGTCTCGCATTTTGTCTGGCAGAGTGTTAGAATTAANNTAGATCAAGTGCCTACTACTCATGTACGTGATTAGTAAAGTAAATTTTGTAAATTTTAGTTTGTTTGAGATTTTACTGAATTGAACGAGCNNGTTGCATCTGGCTTAAATAAGTTCTATGNTTGCTTTTNTNNCAATTCTGACATTGGAGTTTATGGAATATAGGAAGTGACTTGGTATACTTCAAGA
Gma.5595.1.S1_at	BM139888		0	No Homology to Known Proteins			ACAAGCACAAGCATGGGAAGATGAAGACTAACTTGAGGCTTGGGATAACGGAGTTGTTGGAGGATTTGGGTGCTGAAGATGATGAGCATGTGGTGGTNNCTTTGNTGCCCAAGTTTGGGAAGGGGCATGTCATCGTTGGTGGGATCAAGATAGAGTTTCACAAGTGAGGATGGCGATAGTTAATTGAATTGAAAAAGTTTGAATGAAATTAAGCCATATGCTTGCTGGTTAATTTCACTGTTCATAACGAGGTTTGCACTAGGTTTGAAAAATGATGGTTGGATAAAAGACGTCCTTNGAGTACCAAGAGGTGAAATCGTATCTAGCTATAG
Gma.5633.1.S1_at	BM139864		0	No Homology to Known Proteins			GTCAAGGCCCATCTGTAGCCCCGTATCCCAGAAGTTCATTCAGCAACCTTCCGGGTTCTCGACCAGACAAGAAGCATGAGTTGATCAAGAGAATCCTTAATATTTCATCCCCCTCCAAATGATATCACTTATCTCTTTTTATAATTTATGCCTTTTTCCACTCCTCATGTAAAATATATTCCCTTCGTCTATGTATTATAAAATAAACGCTCTCTTATCACTTGTGTTTCNNNNNNNNNANNNNNNNTTTTTTCTCTGTTATATACCATTGAAATTGGCGCTGTTTTCT
Gma.5576.2.S1_at	BM307580		0	No Homology to Known Proteins			CTGCATTTCTTGTACTAAGTTCCTCTTGTCTTATGGATTTTCTGATGCTCTGTTAAGATACTATTCGTTTCCAGTGATGTAT
Gma.5584.1.S1_s_at	BI967548		0	No Homology to Known Proteins			TCCACCTTACCACTACTAGGTAGCACTTTCTCTTCACACCCCCACATGGATGCATACAGAAAGTGTGAAAATGAAAGTCATGGAGTGGGAAGATGCATCTGCAGCTTGCAGATCCACAAAGAA
Gma.5584.2.S1_s_at	BM732633		0	No Homology to Known Proteins			TAAGAAAAACGAAGTGTCAATCCCTTTCTTCTTCGTTTGTATTGTTTATGAATTATTAATTACTTTGGTTTTAGACAGTTGTATGGCACTGCTTTTGTCTCTGTCGTTGAATGATATCA
Gma.5584.4.S1_s_at	BQ610991		0	No Homology to Known Proteins			TCCACCCTACCACTACTAGAATATAGCCCTTTCATATCACACCCCCACATGGATGTATACAGAAAGTGTGAAAATGAAAGCCATGGAGGGGGAAGGTGCAGTTGCAGTTTGCAAATCCACAAAGAAGTATAAATGTTTGATTATTGTTATTGTTTAGAGGACTCTGTCTA
Gma.5585.1.S1_at	AW310156		0	No Homology to Known Proteins			AGAGAATATCACACGAATCCCACCCTCCCCCAGGGTACGGATCTCCTTACCCTCCACCCCAACCGGGTTACCCATCCGCACCGCCTCATGAAGGGTACCCTCCGCCGCCGCCGCCNCCTCACGGATACGGTGGGTACCCTCCGCCGCAGCCGCCGCAGCGTCCGCCGTACGACTCCTATCAGGGTTACTTCGATAACGGGCATCCACCGCCGCCTCCGCCGCCGCACTACCACTACCAGCACGTGGATCACCATCACCACCATGAGGAGCCTGGGTGCTTTTCGTTCCTCCGAGGCTGCATCGCAGCGCTTTGCTGTTGTTGTGTGCTAGAGGAGTGTTGCTTCTGATAATCACANCGTAAAAGTTGTTTCTTCAGTTTGCTGCACTTGGTTATGGCTC…
Gma.5475.1.S1_at	BU577501		0	No Homology to Known Proteins			TTGGTCTCTGTTGAGTTACTCTGTTTAATTATCTTCTTAATTGTGTTGGTTTCGTTGGTGTTTGTTCATTGCTACATAATTTTGTGATTCTTTGTTTCCCGGCTTCATTTGTTTTATCTAGATGACCATGGTTTCAATGTACGTTTAATCATATGTAGA
Gma.5273.1.S1_s_at	AI965477		0	No Homology to Known Proteins			GTGGAGGATGGTCATGATCATCACCATCACTNNCNNNNNAAAAAACACTGGCCTCCTACCACACAAAATGAACCTTCGAAAGTAGAAAACAAGGATGGTCACTATAAGCCTCCCCACAAGAAGCATCCTCCTTCGGGAAATTAATTAATNTAGTGAAGCTGCTACGTACTACCATGCATGCACTCTTGTGAAAATA
Gma.5813.1.S1_at	AW349069		0	No Homology to Known Proteins			TTATCAAGGTCCTCCTGTGATGGCACCACCGCAATATTATGCTGCTCCACCACCACGCACAAGACAAACTGGATTCCTTGAGGGATGTCTTGCAGCTCTGTGTTGTTGCTGCCTCATAGATGAGTGCTGCTGTGATCCCTCAATCTTATGTATCATCTGATGTGATCAAAATTGCTGCAAGTAGGAAAAACAAAATGAAGAAGATACAAGTACATATATATGCAGTGTGATGCTTCCAGAGGGCTTCAGTTAGCATTATGTTTAGTTGAATAGTAGTCTTACTTTTATCCAGAACTAGAACTTATGTTTGTGCTTGATTAACATGGTTTCTTTCCATCTTGGTCTTTGGTGNGGTNGNGCATCACCAGTGATTTGATTTGTAATGTGGAAAGTAAACAA…
Gma.5929.1.S1_at	BQ610446		0	No Homology to Known Proteins			GGTGATATATATTGTACGTTGTCCATTTATTGCCGGGGAATATTTATAGTAATCTTTCATTTTCCTTTGTTCTTCCATCTTGTATTGTATGGATAGGATTATTGTTTTTTCTTCCTCCTCCTTACTTCATGTACTTGGGGATCATCTATTGTTATAGGATATT
Gma.5942.1.A1_at	AW432241		0	No Homology to Known Proteins			TTATATGTTCCCCAGGTAGCAAAGTAACGAAAGCCATTTTGTCATGTTGAGTTTGATATCATTCTCTTGTTACTGTTTTGTATTGTATATTGTGAATTAAGCGTATAGGACTCATCTCTATGGAAATGGATA
Gma.5847.2.A1_at	AW349427		0	No Homology to Known Proteins			GCTAGGTGTCAGGTTTGTTGGATTCTCTCTCGCATAGTGATGCTTGCATGCATCATGATGTCTCCATCTGCCCAAGAAATCCTTATAAAGACTTGGTCTTCACACTGACATGACATTATTTTTCGGTAATTATTTTNCGTAAAGTGTCCGTTTGTTTTANATTTTGGCAGAATTGGTCTTGATTTGTTGAATATGATCGAGATGTGTGTCC
Gma.5755.1.S1_at	BE611571		0	No Homology to Known Proteins			AACAATGCAACTTCACCCAATAACCCCCATAATCCTACTCCTATGCCTGGAAGGAATCACTCAATTGGAAAATACAACAACAGTGGCACTCANAAGATCAAAGGTCTGAGTAACCAAACGGGCTTCACCGAAGGCAATGCTAACGGAGCCATCAACTTTGGCAGTTTACATGCCTAAGTAAATCGATGTACCAAGATCTTGAAATACATAAATAATAATGTGACGCATATATTAAAATAAGAGCTTCACAGTTTGAGTGTGGCTCCAATATTTTCAGCT
Gma.5672.8.S1_at	BI970927		0	No Homology to Known Proteins			ACAATATTTGTGATTCTGACCAAGTTGGTTCTATTTGTTTGATGGCCATCTTGCACGTCCTGATCTTATTGTGTTCAAGTGACAGACAAATCAGAACAGGGAAGAGAGATTTGAAA
Gma.5699.1.S1_at	CD404425		0	No Homology to Known Proteins			TCTTCTTCCTGTGCCAGCCAGGTCANGTACGCGACNCTCGTCGCNAAANNAATAAAACCTGAGAAATCGAGAAGGGNTTGTGTAAGGCTGCANACNNGTTTNTTGTAATATGGGANNNAAACNGAGAAGAGGTTGTTACAGTGGATTGAGGTNAGAGGAGAAAGTCTCTCCATATTGATTTGAATTGTTATGGATATTCAGAGTTGTGAAATAAAAATGGCTGAGAAAGAGTAGGTTGCAGAGAAANTGTGTATGTATAGGGATGAATTTGGAGACCATAATTCAGGGTTGCATAGACAGTAGTGACACTTTCTGTTGC
Gma.6015.1.A1_at	CD395399		0	No Homology to Known Proteins			ATAGACATGCCCCATTACATAGAATCCTAAGCAATAAATAATCACNAAATAACAGGAATTTAGAACTGTGGNTAAAGGAAAATATATCTGCATCATTTTTCACTGGTTTTTCACCATGTGAGTGGGATGAATTGGTGACTATAATTGCACTTTGATTGAGCCAATTGGCTAGTTGTTTTCTCCATCTTATGGTTTTGTCTTTCGCTAAGGTTATATAC
Gma.6262.1.S1_a_at	CD416257		0	No Homology to Known Proteins			TGCAAGTTCAAGATCAGTATCGAGGTCAAATACTCCAAGGTCTACCTCTCCTTCAACTTGAAATTTGTTGGTCCTATATGGCTT
Gma.6296.2.S1_at	CD392554		0	No Homology to Known Proteins			GCTCCAAGCACATGATGCCGTTGCAGTTCAAGGCGCTACCCTAGAAGATGTGTATGAAAATTCTCGAGTGAAATTTTCTCTATCTGTAGCTTGGATTGGTAGTTGTTTTAAGTAGAGACGTTCATGTGTCTCTCCCGTGTTGGCTGAACATTTAGCGCGTATTATTTACCAGAAAAAATCTCCTTCTAGTTGTTGACTTAGGATATTGTATAATTGAGATATTTTCATGCTTGAATGGTGGTATCCGGATTTCTATATTTTTATGTTGCGTATGTTTTGAANNNNNNNNNANNANTGATTCGGTATTCTCTAACATGGAAGTGAAAACTTCCAAATTGCCATGNANNNNANANNNNANANATGAGTGTGTTTGCATTGGTTAGGAAA
Gma.6333.2.S1_s_at	CD396361		0	No Homology to Known Proteins			ATCGGCAACGGCTACGAGAACGTCGAGATGGAGCACGGTGCTATGGACGCCAAGGACCCGAACTTCGAGGATCCAGCGGAGATCGCCGCCGTGTGATCGCGGTGGTTTCCGGTGACGAGATCTGTACATACTAATAATTGCTAAGAGACGTGGTTTTCGAATTCAATAATATGAAGCAAGTAGGAGAAGAAGCGCTTTCTGTGATTGATTGTTATAGATCTGATCTGTCTCTGGAATTTGGTAGTGGCATGGCACTTGTGTTGTTGTACATATATCGAATGGTCTTGGAAGTGCGTGCACTCATATTCGCATTCAAG
Gma.6337.2.S1_at	CD391354		0	No Homology to Known Proteins			AGGTGTGGAACTGATCTTAGCTTACGGAGTATTGGTAGGAATAGTAATGAAGTATTGTTCTTTTGCACTTTGGGAAGCATCTCATATGGTTCTATCAGTTCTAGATTGTCGCTGAATCCGATGCTCAGATTGTATTTTTGGTTTCCTTCAATGTTTTATCTTCTTCAATATTCTGGCAGTTGTCTTATACTTGTTTTGTTTACTTGAATTGTTAATGTGGCAGAGATTCTTTTTGGAAGATGTTTGTGCGTGGTGTTTTGTTATTTATAATTTGGCCGGGTGGGTATAATAG
Gma.6546.1.S1_at	CD392353		0	No Homology to Known Proteins			AGAAGCGTGAGAGCCTTAGTCGTTCAAGATGAGAGCTAAGTGGAAGAAGAAGCGCATGAGGAGGTTGAAGAGGAAGCGCCGAAAGATGAGACAAAGATCTAAGTAGGTGCTTGAGCAGGAGTTGAGATGAGCTTTCCATCTGCTACCAGCCTCATGACATTTTAGGCTGTTATGGCTCTTATGATCTTGAGGTCTAGTCGCTAGGGGAGCTTCACTCTTGACTTAGTTTGCTTTACTGGTCCTGGTCCTGGTCCAAGACTATTGAGTGTGGGTTAAGTTGTGATGTTTAGTGTTTTGTGGTATCTAATTATGTACTNGTTTTTATACTTTTTGGTTGAATAGCTATATATTAGTATCGAGACTTCCATGAAAANNNNANNNNANNGTATGCTTGAAGTG…
Gma.6515.1.S1_s_at	BQ627548		0	No Homology to Known Proteins			TACCATCCTAGCGAGGTCTCTAATCTTCGGATTCTCTCTCTCAAAGATTAATGCGCCTATTAAAAGTGAAAGCAACTTAGTCATTGAATGTTCTTGTTTGCAGCTTTTGTGACAGCGTATCACATATGACAGACCATGAATTTAGTCAACTGTGCTTTTATC
Gma.6470.1.S1_at	AW760032		0	No Homology to Known Proteins			GTTCAGATATTGTCCGGTCCGAAGACCTTTCTGCANNNNNNNAAANNGTGGGAGCNCGCAANCTTGCATAAATACAGAGAAGAAGAGAAGAGTGAAGAGACGAAGGATGGGGAAGGCAAAAGAAGCGGCGGTGGTGGCGGGAGCCCTAGCATTCGCGTGGCTCGCTATAGAGCTCGCTCTCAAACCCTTCCTTACCAAGGCACGTGCTTCCATCGACAAGTCCGACCCGGCACGTGACCCCGACGACGATGCTCTTCCTAAAACCACCGCCGACGACGTTCCCGAAGCCTCCGCTGACGACGTGCCTGTCGCTGCTGATACCAAAACCACCGACGACGCCTGAACTTATCTCATTCATGTTATTTTGAATGTCCTGAAAATTACTGTCCAAATGAAATA…
Gma.6451.2.S1_s_at	CD400221		0	No Homology to Known Proteins			TCCCCTACCCTTCCGTGATGATGTAGATAGAGAATAAAAAGAGACCAGTGTGCAGTGAGAAAGAGATTGCTCACTTCTTGTGTGGGTTTGTTTTGTTCTTTGTGTTGGAATTTGTTCATGGGTGAAGAAGGAGAAGAGGTGTCAAGAGAGAAGGAACAATACATGGGAGTTTATGGAAATGAGTGGTTGTATTGTGGTTGCTNTGCAAATTGGCGCCGTTTAAGACACCAGAATTCCTGTTCCATGCCTTTTTTCAAGTGAAAAAAAAAAANNNNCAATTACTTGTTNTCTCTCAGCTTTTCTTCTTGAGATCTTAATATACATTG
Gma.6389.1.S1_at	BQ610837		0	No Homology to Known Proteins			TTTACATTTGTGGTAGCATAGGAGCTTCTTTTTTCTTTTTTTAGTAGGATCACAATGCCATTGGGCTGAAGGTTAAGACCAAAATTACTCATTGCTTTCAATAAGGCTTTGGCTGCGGCTGTCTGGGTTATGATTTAGCAGCTTTCATATTAATTTGTTCCTTTCCATCTTTGTTATCCGAAA
Gma.6605.1.S1_s_at	BM139615		0	No Homology to Known Proteins			TACTGTTATGGTTGGTTGGTTTCCGTGTTACTCCTGTCCTGTGGTTCTCGTTTTTG
Gma.6629.1.S1_at	BM523674		0	No Homology to Known Proteins			GTATTGGGTCTTTGGAACGTGATAAGGAAGATTTTCTGTTGTTGTTGTGAAAGAGGGAAGACAATGAAGGCTCCAGGGAGGAATATTCGCATTTATAGAGATGATTTTGAACGTAGCCCTAAGAACTANTTCCGTAACTTGCGCAGAGACCAACGTAACTGGCGCAATAATCAACCTCATACGATTTTGGTTTGAAATCTCAAACGTGTAAATCCACGTCAAACTAGAAGCACCTTTCAGTTGCTTCTGGTGAAACTCNTGAAAAAATGAACGTCGTGCTGTTTTATTATATTAAAGCTTGTCTGTGTTTGTGTATATGGTGCATGTTTGACGTGATTTCGGTAGATATGGTTTGAACAAATGGNNANAAAGATTCTGTTATTTGTGTTNCACTACATG…
Gma.6676.1.S1_s_at	CA819837		0	No Homology to Known Proteins			TTGTGGTCCTTTCAGAAGATGATTGGGAGCTTAGTATTCGGATGTGCTTTGCTGTCCTTGTTGTTCTAGACATCATCGATCTCTGTCTTCGGACTTGCAGATTTTTCTGCCAATTCATGTTATTTTTCTATTTACCTTACCTTTATATATTATTATTTTGTGGATGTGATCATGGGAGTTTATTAATTACTGTATTTGAATTATATACGTACATTGCTTGCATTCTTGGGAGATTTGAGG
Gma.7266.1.S1_at	BI969207		0	No Homology to Known Proteins			TAAGCCAGGCCTTTTTTTTTCTATGTTCTATGGCCTCTGGTTTCAGCCTGTCTCTGCATCTTACATCATTTCAAGTATGACACTGTTCATTGTAAGTTCAAAACCCTGGTTTTTCATGTTGAGCACACTTGTCGAGGGAGATTTATTCAGACCAAAGATTATATGACTACTGGTCTATGTCAAAGGTTGACTTGCCAGAGAACATGATTCTGTATTGGCTGTGTAACTAAAACCAAAGCATAAACCCATCTATGATGTTTTCTCCTAAAGTAGTAGACCATTTTATGTTGCTGGAATGGTTTCT
Gma.6758.1.S1_s_at	BU760603		0	No Homology to Known Proteins			TGCTGCTGTTGCCTGTTGGATGCCTGCTTCTGAGAAAGAAAAGAGAGGTTGCTTTGCACAAATTGGATTTGAAACTGTGTTTTGACTTTGAACATGACCATTATCGCTCTTAGTTTTTATTATTTTCTATGTTGATTTACATTTCGTGGATATGAAATATTGTTCTGCTTCATTAACAGGAGGATTCGTGGCTTTTTGTT
Gma.7185.1.S1_s_at	AW471611		0	No Homology to Known Proteins			AGGCATTCACGGTCTAGTAACTTGTCATTGTTTGGTCTCTAGAGACCATGAGCCCATTGCCACGAGGTTGTATTCTACATAATTATATTCG
Gma.7098.1.S1_a_at	BU544552		0	No Homology to Known Proteins			AGAGCAATGTCTATTTCCCTACTAACTTCAGAAACTGCTCACGGCAGCAAGGCATGTATCAAATGAAGAAGAATGTGTTAGAATTGATAAGTATCTTCGTTGGACAAACTATACATTGTAAAGTGGCTGTTTGGTTGGTTAGCATTTGTATGCTTTTGTACAAGTTTGTTTCTACACTGTTTCAATACCCAGTGACAGGGTTGAATATGCTACCTTTCTACTTTGACGATTGATTTGGAGGCTCTTGATCCTGATTGGAAATC
Gma.6883.1.S1_a_at	BE658807		0	No Homology to Known Proteins			GGTTTTTGGTTGTTATGGGATGCTTGTGTAGCTGTCTTTGTTGGTTAAGAA
Gma.8005.1.S1_at	BI426427		0	No Homology to Known Proteins			TGAAGGTGGCATTTCCGCGGTCTAATAATTAAAATGTGCCATTGTTTGGTCCCAAGAGACCATATATTGCCCGCTCCTGCCATGTGCGAAGTTGTATTCTATACAAGTTATAATTATGCTCGTGATATTTAACTTAGGTATTTAAGTGTGCTAATTTGGTGTACGACGTACAGTACCCTTTTTATCAACATTCTT
Gma.8185.1.A1_at	BU548568		0	No Homology to Known Proteins			TGGGCCAGCAAAGCAGAAGCATAGCTATAGTGGGTGTACATGTTTTTGCGCTCATAAATTTATGTGTAAAGTGTAAATTGAAGATGAGAGAGAGAGAGAGAGAAAAAAAGAATACGAGGTCCCATAGCAGTTTAATGAAATG
Gma.8149.1.S1_at	BQ629660		0	No Homology to Known Proteins			AACAGTTGCTGCCATATTCACCAATGGCTTTCTCCAAGGCAATGTTTCTCGCCGCCGTAATGTCGGTGCTCGTCGCCGTCATCTCCGCCGCCGAAGCTCCAGCTCCGAGCCCTACGTCTCCCGCCGCCGCCGTTTCGCCGTCCTTCGTCGCCGGTGTTCTCGCCGCCGGAGCCGCTCTTGCGTTCGGATCTGCTCTGCGGATCTGAACGTAGCTCATGGATTTTCTCGTTTACATGCGTGGATTTTTAGTAGAAGCGGAGATTTGAGCAGCATTAGTATATAACTCTCTCTCTCTCTCTCCCTCCCTCTCTCTCTATATATATTGATATTGCTATGTAGAGATTATTACTACATATGTTGATTTCTGGATCTATATTGCGTTTATGGTTTGAGTAGTAT…
Gma.767.1.A1_at	BU083371		0	No Homology to Known Proteins			ATGGCAATGCTGAAACTAGTTACACTAGTGGTGCTAATGCTGGTAATTACCAATTCAATGAAAATTCTGGTGGAGTTTTTGGCTCAGCTAGCGGTGAATTCAGCAGCAACCAAAATGACGCAACAGGTGCAGACAATGATNAATTCATTGAGCCACTTGAAGACAATGTGAGGGAGAACAATGATGAACCTACTGACTACGCTCAGAACCGCTGATGAGAATTTTCACCTTGCCTAGAGCAAGTTACTTCTTCTGGAGTTT
Gma.7875.1.S1_at	BQ610129		0	No Homology to Known Proteins			TAAGTGGATCGTGCTTAGACCGAGTAAATATAGCCAATACTTGGATACGTCGTGTAAATTAGTTTCACCCTGTTGTTTATGGAAT
Gma.9774.1.S1_at	CA935566		0	No Homology to Known Proteins			TGCTGCTCTATTATCAGGAATTATATTCCTTCAACATTTTAGCCCTTGTTGTGTCTTTGCTGCTACATGACCATTGTGCTGGGAGACCAAACTATCAGAGCAAGTTCCATGCACCAAACCACAGATTTTGGCTTTGGAAGTCTGAATATATTGGTGTATGTGAAATTATTAATATCATTATTTATAAAATATATAGTTAAATTTTGTATGTCGTTTGAAACATTCTTGCAACT
GmaAffx.10278.1.S1_at	BG237749		0	No Homology to Known Proteins			GACAAAATCGGTTTTATGAATCGGATTGATTGTTTAATTTTCCTTTTTTTGAATTTTTGTTGTTAGACTTTTCAGATTTGAGGTAGAAGAAGTTTAGCTTTTTTTATTTTTAATTTCCGTAGAATTTCTGTTCGAGTGGGTGGGACGGGTAAGGAGGAAGACATCCTGTTGGTTTCTGTGATATGAAACCAATTTGGGTTGAATAAGCATGTTTTGTTTGGGGAATGTGTGTGCATTTTGCTTTTGCTTTATTAAATACTAAATTATGTGTTTCTGTCCACCTTTTCAATATATCAAA
Gma.9854.1.A1_at	AI440587		0	No Homology to Known Proteins			AAGCCAGCGGCCCAAAAGGAACAGATGTCTGATAATCAGTCAGTAGCTCATTCTTTAGACGGTTCCGATGATGTACATATGGACCCAAAACTATTGGAATCTGAAGGTGCAGTTGAGGGAAGCAGTGTCAGCTCGGTTCCCACTTCTAGTGAGATACAAGAGGAGCATGAAGTCAAATATGATGAGAAATGAAGGTGAATCATGCATGATCTATCATGAAAAACATGATTTGGAATAAGCTTGTCACACAATCTGTTTCATAATCATATTAGTTGTACTTTGAACTGGACATCAATACAATATGCAAACGCACGTATCTTTCTATGCA
Gma.9083.1.S1_at	AW307396		0	No Homology to Known Proteins			ACAACAGGCGTATTATTCCGCTCCACCAAGTGGGTATCCTTATANNNNGCCACCGCAGCCTTATAATGCGCCGCCTCAGAGTGGCTACGGCTATAATGCGCTGCCGCAAACGGCGTCGTATGGGCAGGGGAGCGGTTACGGGTACGCGCCACAAGAGGAGAAGAAGAAGAGTAAGTTTGGTGGGATGGGGACGGGATTGGCTGTGGGTGCGGTTGCTGGGGCTCTAGGTGGAATCGCACTCGTGGAGGGTGCTGAGTATGTTGAGGACAAGATTGAAGATGACGTGGCGGAAAGAGTGGAGGATGATCTTGGTTACGATGGTGATGACTTCTAGAGAGTGGTGTGATGTTTCAGGAGGAGGAGGAGGAAAAAAAAAACAAGGAATAATAATATTTTAAG…
Gma.9194.1.S1_at	BM526746		0	No Homology to Known Proteins			CCATTATTTTTGTCTAAATACCATGTTCTGTGATGCTGGATGGCTGCAGTTGATCCGTCAGTATATGTATTACCTTTTGATTCTCTTTTGCCAACTGGTGGATCCTTATTTCCCCAGGTAAATATAGCCTTGTTTATTGTAAACGTCTACAATGTCATATAGTAAGTATATTTGACTTGAAATGGTCAGATCAGAACTCAGAATGCTTCTGTAATGGGGAAAACTAAAGCCTTGGCTGGAAGGAGGGGAGGGTCGAGAAGAGTTTTTTTNGATGGTGGGGGTTGTTGGTTGGGTTTTGTTTCCTCATGTTAATATGTGCCTCATTTACAATGTTGCACAATGCTCAGCAGTTCCTTTCCT
Gma.8787.1.S1_at	BU765191		0	No Homology to Known Proteins			ATTAAGGCCTCTCCACTCCAAGTCATTCTTACACCACGTCTTTCTGGTCATATTTATGATGAAATTTAAATACTAAAAAAATAAGATANCATGTCATGCATGGATAAATTAGGAATGCTTGGCTTTTATCGTTTTGAATAAATTACGAATGCTANNATTTTATTATTTAAATAAAATAGGAATATAAAACCTGGGATTAAGGAAAAGATTAGTCAAATCCTGAGTCATGGGATTCCTTTTTTATTTTTGGATTCTAATTTCTTATGATTAAGGGAATTGTCTCCCCCTATGT
GmaAffx.37923.1.A1_s_at	BU547349		0	No Homology to Known Proteins			CTTATTTCCTTCATCGTACATAAATAAGCTATATTTTGCTGTTGGCTTGTTTGGTGGGAAAAAAAAAAAAAGACATGGGATTGTATGGTGAAAGCTATTTGGTAACTCTTTAGAGTACATGCAGTCAAGATTGGCATTTTTATTTGTGATGTGGGACAAGTTTTTTGGTAGATGAGGTCGTGTCTAGCCTTTCCAGTCATTAATTCTAGTGAGGGATCTCTGAAGTGGTGTTCTTTT
GmaAffx.38078.1.S1_at	CD405216		0	No Homology to Known Proteins			GACGAGGAGGAGACTTCACAGCCACCTACTAAGAAGAGAAAGTGAGAATATTCGTAGGAGATTGTTTCCAGGCATTTGAGTCGAGCTTAGTTATTANGGACAGATAAAATAGCAACCTCTTTCAGTAGACCTATCTTGCTTTATTTATATGTCAACGATGAT
GmaAffx.38315.1.S1_at	CA802980		0	No Homology to Known Proteins			TTATTGGGCCATTTTGTCTCATTAGATATGAATTTTTGCTTTGCTGTCTTGGTGAAATATAGACACTCCTTGGGCTTCATATTGCTTGAATAAA
GmaAffx.34785.7.S1_s_at	BI497973		0	No Homology to Known Proteins			ACCACCAGTTCACCCTCCCTACATTCCACACCCAGTTTACCACTCTCCTCCACCACCACCTTACAAGAAGCCTTACATCTATGCATCACCTCCCCCTCCTTACCACTATTAGCATACCTCTTATCGATATGAA
GmaAffx.38936.1.S1_at	AW101501		0	No Homology to Known Proteins			TCGAAATAATTGTAGGACTGATCCAATTTTGGAAGAGGTTAGAATCAAGATCGACACTTCTCTCATGGTTCTTAATTTTTTGTTGTGTTTTTTTGGCACTGCCTGCTTATTCTTAACAATCTAGTGTGGCAACGACTACAAGCTCCAAGGATTTGGAAACTGCTTT
GmaAffx.48348.1.S1_s_at	BI945215		0	No Homology to Known Proteins			TTTTTCCCTATCTTGTGATCTATTTATGAGNGAGAAAAACAAAAGTGAGAAATTGTGCGTGTATCTGGTTGCTAATTCGAGTGCTATTAGTCTGTGGTTTGGTTGGTTTGTAACCCCGCTACTTGGGTTATGTTTGATT
GmaAffx.43695.1.A1_at	AW278143		0	No Homology to Known Proteins			TATATAGAGACTTCATGCGTGGCTGGTTCGAGATCTAATGGAATTCTGTTGGTGTTATCTGTCTAGTTTGAAGGATTAATTAGGAATTGGGGAAAGAATTGCAAAGATTTTAGAAAGCTGGAGTAGTTGTGAAGANCTGTGGAGACGAGGAAGAGAAGCATGTNTTTAATTTACTTAGCTCAGTGTATATGTATATNNAGTAAGAACTTTGATTTCTGTGTTTTTCTTTTGCNTNATGTGTTTGGAATAAAGAAAGTGATCGATGATGGGCGAATTTTTAATGGATTNATTTCTGAATANNNNNAANNNNNATACATTTTAATTTAATTTATGAACTCTACTGTTTTTTTTTTTTAAAATATAATCCTTGATATTTTGTTGGT
GmaAffx.43216.1.A1_s_at	CD414339		0	No Homology to Known Proteins			TTAACTTTAGAAGATGTGGGCAAATGAACTCACCTGGGTGATGGCTGGTTTTTCCTGCAGCTGTCTTCACTCCTGCTGAAAAATCCTCATTTAGGAATTTTTGAATTGATCCGAATTCAAAGTACAGAAGAAAAAAATGCTAATGTTGTGGTGAAAATTGTAGCTTTGTGCTCACAAATTTAATTCTCCATTTGAGGGTATGAAAT
GmaAffx.4451.1.S1_at	AW100961		0	No Homology to Known Proteins			CACCAGGTTCTCATGGGCACGGCGGNATGGGAGCAATGCTCNCNGGGGGTGCTGCNGCGGCTGCTGCTGCTTATGGTGCTCACCATGTCTCTCATGGCTCCCATGGCTCCTATGGCCAATATGCNNNACATGGTGCTCACATGCCACATGGAAAATTCAAGCAGCACGGNNNGCACGGNAAGTTCAAGCATGGAAAGCATGGCAAGTTCGGCAAGCATGGAAAGCATGGCAAGTTCGGCAAGCATGGTGGANNNTTCAAGAAGTGGAAGTGATGAATATGTATCTATGACTCCAAAATGCTGCTCTGTGTAGAGCTTATTATTGCTTTATAATAAACCATACTTTGAATGATGNNAGGGATCGATCTATGAGATCATGATACTTGACCCCTTGTTTTC
GmaAffx.26583.1.S1_at	BE801555		0	No Homology to Known Proteins			ATAAATTTCCACGAGGTGGTCACGTTGACATGAAGCTAGCTCGTTCTTTTTCCATGCAACATTTTACAATGTATATTCAATCCAAAAATAATTTCAGAACTGATTGTTTCGAAGCAAGTAGTGTTGTTTATAGTTGTAATATCCGGTGTCTATAAATTGTGATTCCTATCCAGCCAAAAA
GmaAffx.27321.1.S1_s_at	BG551437		0	No Homology to Known Proteins			CTCAATCATACTTGGTAGTCCAGTAAATTCCAATATCAGGCTTGTATTTGAAATGGGAGATACTTGTCTTTAGTATATTATTACTATTATTTCATTTGTTTTCGTACACAAACCCTGTATCCAAACT
GmaAffx.27492.1.S1_s_at	AW350702		0	No Homology to Known Proteins			GAATACTTCATGTAAGGACTATATTTATGGGNAGCACACGACCTAGTATAGTGCAGTTCGGTACTTGTGTTCTTGACCCGGTTCCTTGCTTCCACAAAATTATAACCGATAAAATCCCCTTGATAATGAAAGTATGTTGGAATGTTTGTCCATTTCATACCAACATTATCTGTGTTGTAGCTTGTTTTAATGGTTGTCTGTTACTAAGTTTGGAGAGATATAAGTCAAAAGTGCAAAGTATACACATATCCATATTTTGACCAAATGATCTTATTGTAGTTTGCTGTAAGATGTTTCGGTCTA
GmaAffx.27610.1.S1_s_at	BI426859		0	No Homology to Known Proteins			AGTTCCATAATCAAGCTTCCTCCCATTTTGAATCTGTCTGTAATGCCATTCAGTCATACATGAAATTGTATGGACTTGCCTATTTTAAAA
GmaAffx.25368.1.S1_at	BE657690		0	No Homology to Known Proteins			CGGTGGAGAGCCTGACGACGACGATAACGATGACGACGACGAAGATGAAGACGAGGAGGATGAGGAGGAGCAAGGGGAAGAGGCGGATTTGGGAACAGAGTACCTTATCCGCCCTCTAGTCACTGCTGAGGAGGAGGAAGCATCTAGTGATTTCGAACCAGAGGAGAATGGCGAGGAGGAGGAAGAAGATGTCGATGATGAGGATGGTGAGAAGTCTGAGGCTCCACCAAAAAGAAAGAGGTCAGATAAAGATGATTCAGATGACGATGATGGCGGTGAAGATGATGATGAGAGACCCTCTAAGAGGTAGAACTGGGTCCATTCTTTGCTTAAGGGCTCAGACTAGTCAACTTATCTCCCTTTGCCCTTTAAAAACATTTCAGGGACTTGTTTCATTCT…
GmaAffx.25369.1.S1_s_at	AW100848		0	No Homology to Known Proteins			CTCTTATTAGTCTTAGCAGTATCAGTATCCCAGGGAAATCCATCATTTTCTTTTTCTTAGTTTCATTGTTTTTGTAACTTCTAGTACTCAGGATGTCCATCATCATTTTCGTGAGTATGTACTACGAATCTACGATCGTGTTGACA
GmaAffx.25581.1.S1_s_at	BI699942		0	No Homology to Known Proteins			GTGGATATTACCCTTGAGGCTTAATGAGCCTACAATAAATTCCAATGTTCAAAAAGAATATCTAGCTCATCGTAACCATACTAGTACCAACAATAAGATATGGGTACGAGGATGCTTATAAACTAATGAAATTGAAGTGTAACATGTCCTTGCATGTTGTCAA
GmaAffx.28214.1.A1_at	CD414400		0	No Homology to Known Proteins			CAGGTACTGCTTAGATGTTGCTAATGTTTTAGATTTATTCCTTTTTTTTTTGGGTTAGTCGATACCCGTTTGTGGTGAAACTCGTGAACTCTAAAAGAGTGTTTACGTCAGCTTCTATCAGTGAAATAGTTTTCTTGTTTACATTT
GmaAffx.28989.1.S1_at	BU548047		0	No Homology to Known Proteins			GTTTTATTTTACACAGATTCAAGAAAGGAAAAAAACAAACAACAGGTTTGGTTTGGTTTTCGAGGCAAATATGGAAATGTCATCGTCCTCTCTGGGCAATATGCCGGTTCGGTATTGTTTTTTTAGTTGCTAGATCTTCTTCACGTTGCCAATGCGGTGGGTAGTTAATTAGTAGATATGGGNTTTGAGATTTGAGAACAATTATGTGTTACTAGAGCTAGAGTCTCCAATCCTTTTATTATTATTATTATTATTATTTTCTTTTATCTCATTCCCGTTTTCGGTGGTTTTGTTTTATGTTATGTTATTGTAGGAACTCGATTTATGGAGTTTACATGCTTCT
GmaAffx.29360.1.S1_at	CA935299		0	No Homology to Known Proteins			TTTTTCTTGTACTCTTACTCCCATGATTAATATATTCTTCTTATGATGTTGCATATATGATGCTAGTATATGCACCTTCCATTGTCATGTGG
GmaAffx.29360.1.S1_s_at	CA935299		0	No Homology to Known Proteins			ATTGATTAATCTCGCTAGCTCCTACCACTTTGTTATGCACTTTATTTAATTTCACTGTGATGGACTCTTTCGTTATTATATATATCATGTTAATTAATTACTAGTTGTCTCCTTTGTTCTGTACTCAATTCTTATTTTCTGTAACCACATATGTGGAACTTTTTCTTGT
GmaAffx.30151.1.S1_s_at	AW317339		0	No Homology to Known Proteins			GTTGACGTATTATACCTTCCTTCCAGTGTGTTTAGACTATTACTGTGATGTGAAGTCTTGAGCTTTATGAACTGTTGGTCTAAGCTTAATGTGAGGTCTTTGGCTTTGNANNNNTAATAATATCCGTTATNTTTGAGTGTGTTAAATTATTTCCTTAGTTTGAATGAGTTTATGTGCCCTGCATCATGTAATTTTACCTTCTAATTATTACTGGCTAAG
GmaAffx.30662.1.S1_at	BE023739		0	No Homology to Known Proteins			AATGTTCAACGAATAGTGATAATGATGATTATTGTGATTTTTGAAATGTGATCTAGAACTTGCACTTGGCAACGTTAGTTTGTCATGTTTTTATCTCATGTTCGTTTGTATGGTTGAAACAAAATAAATTTGTCAAACAATATGATGCTTCTTTTTATGCCGATTCTTGTTCAGTAAGATTTTTAAAGAAAATGATCTTAAGACCCCAGACTTTTATCAA
GmaAffx.34612.1.S1_at	AW311496		0	No Homology to Known Proteins			GCGGGCCGGTCGTCAGTTCAGACTAGCTGGTCAGTGGGGGTAAGAGAGTGTTCCGTTAGTGTTCTCACAGTCTCAGTGCGACCTTGCTTGGTCAACAATT
GmaAffx.34785.26.A1_x_at	BE661741		0	No Homology to Known Proteins			TCCTCCTTCCGTAAATTGCTCGTCTTTCCNAAACGTGAATAGTTTAAAGAAGGGAGTTCTCTTTATTTGTATTTCTAAATCCAACTGTTTAGTTAAGGGATGGTTATCTCTTGTAGAGCTTTTAGTTTGAT
GmaAffx.33081.1.S1_s_at	BQ453706		0	No Homology to Known Proteins			CTAGGCTACTTTTTTATATTTGTGCTGGTAGAAAAGAATTTCTTCTTTTGTTGGCATGATATACTCTACCAACTACTTGAGCT
GmaAffx.33119.1.S1_at	BQ611020		0	No Homology to Known Proteins			AGAGTTAGCTTCAAGAGTGTGTTGTGTTGTGTTGTGCCTATCCCTGCCTTATTCTAGTTCTTTTTTTCATATATATATTTGAGGAGTAAGTACTTTTGATTGAGTCAAGCTATTTATCTGATTCGGTTGCTTATTGATGAGAGGCAAATATCAAACTGTATTTTCATCTGTATAAGTATGATTCACTG
GmaAffx.3329.1.A1_s_at	BM139593		0	No Homology to Known Proteins			TGCTCCACTCCCTCGGTATCAACGACATCNCCGGCATCACCCAGGTTGATCCTGTCCCTGTTCAGCAGAACTTCCCCTTCACCAGGAGGTACTGATGATGATGGAGGCTCTTCTGCTTTGAGAAATAAGACTTTGTTTTATGCTTCTCGTTTCGTGTTTTCGTGGTTTTTATTTTATTTTATTTTATTTCTCAAGCCTTTTAATTTTTGTTGTTGTTGCTACTGCTGCTGCTTTAGATTAGACCGAGTGGAATTATTATTAGGGTTTTTGGATTATAAGAAATGATATACCGTTGGAGTC
GmaAffx.24129.1.S1_s_at	BQ610397		0	No Homology to Known Proteins			GAATGATTCCGGGTTAGGTCTTTGTCTATGTTTTAGTGTTCGTCCAAGTACTATTATTGATGTAATTCAATTCTATTTGTATCTCA
GmaAffx.23152.1.S1_at	BI701453		0	No Homology to Known Proteins			TTTTTCTGAGTTTCTTTTCTTGTCTTATTTCCAGAAACGTGGAATGTCAGCGTTTTATACTTCACTTTTACTTCGCTTATTTTTTTATTTATGTTTTGTGCTGGTCTTTGCTAGGTAAGTTCACTTATTGTCCAAGGTATGCAGTGTAGCGTTCACTTGTTATTTTTCATGTAATCTGTATTTGA
GmaAffx.23184.2.A1_at	BG651576		0	No Homology to Known Proteins			GATTATTAAAGCTCGTACACATGTTTTATTCCNNNNTGTGTTTACAGTTAAAAAGGTATGAACAATGGTCATTGGTTGTCTTTTTCTTGGTTCCTTTTTATATTTTTAAGTTAGTCTCTTGGCTCCTCTAATAGCAGTAGCTGAATGGTTTCTAAGAAAAAATTTCTAGTCTAATCTTGTGTAATTGAGATACATGGGTTTACTCTTAATGTGCTTGACGTATCGATGATTACATGAGGTAGTTTTGTCAATGACATAACGGCTGATGAGGGCAAACCTTCAAAGCTCTTTGGNNANANGATGAGGACTGAGCAGCCATTGTTGTT
GmaAffx.23289.1.S1_at	CD392087		0	No Homology to Known Proteins			AAGTAGCAACTCTGTAGCCTCTTTTCCCATCATCTCCTTACCTCCTCTTTTTTCAAATTAGTCCTGCAGAAGAAGATCATCATGAGGCGCTTAAAGTCAAGAACAACACCACTTTTGTCCAAGTTTGCGCCGTTGTTGGAGCCATGGCCAAATGATGCTATAAGAAAGGAACTATAAACCTGATCAGGACATTTGACCTGAGGAAACATGCCCTCTAGGCAAGTCTGATGCTTGGCTTTTCATCTCTGCTGTTGAGAATCAAATAAGGCATGGCTCACGTCATGAAATTATTTAGCATATCATATCTGTTTGATATTAGTATAAGTTTTTCTGTTTACTACCTCTCCTCCTTCCTTTCCCAGTTGGGACAATGATATGTTATGTATATCCTTCTCTGCT…
GmaAffx.19541.1.S1_s_at	BQ612990		0	No Homology to Known Proteins			GGAATAATTAAGACCACTCCAATTGTATTTGGACCTTTCTGATGGTGCTTGATGCTACTACTTGTAATATCTTCTTTAACTTAT
GmaAffx.16384.1.S1_s_at	AW307590		0	No Homology to Known Proteins			CAATCACGAAAGGATCAAGTTGAATGAAAATTCAACCTTGTTGCCGATCAAACTCCCTAGGTAATTTATTCAATCTGTGTGACTAGGTAGGTGCAATTACGGCTTGATGAGTGTCCTTCTGCTGTAAAGTGCCAAGTAACGATATTAATCTCCAA
GmaAffx.16696.1.S1_s_at	AW706525		0	No Homology to Known Proteins			AAGTATCACCATGCCTGTGTATCTCTATCATATCTTCCATTTCTAGTGTGCCTTTGAATAAATTCTGTGCGAGCTTGAAGAGTGTTTAATTATGCCTATGGTGTTACTTCATATATATATTTGCGTATATATAATGTATGCTATGTTGGCTATATTGA
GmaAffx.16168.1.A1_at	CD408636		0	No Homology to Known Proteins			AACAGCAGATGAAGGATAGAGCCAAGGAGCTCAAGGTCTTGCTCAAGAAAGGGGTGAAGATTGTGGGAGATTCATGCAAGAAGGGGTGGAACAAAGTCAAACACATCAAACGCTAGCTGATTAGTGNNNTTGTAATCATNTGTTGCATGGCTTATTATCCCAAAGTCTCTTGATTGNNNNNTTTTNTTTTTTGGTATTGNNNNNTATTTGTACTTTCATAGGTTTGGTTTGCATGTAAAATGTAGTCCTTC
GmaAffx.1790.1.A1_at	CD412488		0	No Homology to Known Proteins			TTTCTTTGCTTTGTTCTCTTATAATTTAATTTATTGATGTAATTTGAATTTTGTTGCCACGAAGGATGGTTCCAA
GmaAffx.1790.1.A1_s_at	CD412488		0	No Homology to Known Proteins			TATGTATGGGTGTTTTGTTTTGTGCTTGTGTAATTTTGTGGTGTTGATGTTTGTTTAACTAGCATTTGATGGGACAATCAGCTAATTTAGGAGGGCTATATACCCTACAAACAG
GmaAffx.11919.1.S1_s_at	AW760869		0	No Homology to Known Proteins			TAGTAACCATTTATTCTGATATTAAAAAAATAAACAAAACAAATAACAACTCATGTGATGTGAGTTCTGGACAGGATTCTCCAGCCAGCCGGCCATCCTCTATCTCTATTCTCTAAAACATTATATTATATCAAAATTCTACCATATCATAGAATTTCTCTATATTAATTTTCAATAACACGGAATATTGATATATTATCCACCCCTCATTTTTTACACGCAGGTCGATTTTTTTTTCCAGTTTTTTTATTTACAAATTACAACGTGCGTGCATATTCCGTATCCCGTATTCCGTCCGTGTGTAAGAGTACACCG
GmaAffx.11956.1.A1_at	BE657986		0	No Homology to Known Proteins			TTGCTTTAACTGGTACTACTTCTGCTCCCTAGTTATCCTACTTGTTTGCTTTGTTCCTTGTTTTTAGTAGCTTCGGTTAGCTGTGTCTCACCATGCTTTGTTACTCTCCNTTTTCATNTNNTTNTNNTTNTTNTNNTTNTTATTATGAACCTAGAACAATTGGATGCATTTGTGNTTTTTTANATGTGGNTGGCTAATGCTGTTAATATTTTATATCTTTTGCCATGTGATTGTTATTATGATCATTNTGAATTCAATGCAATCTGCTTGGGTTTAAATTGTGGAA
GmaAffx.12007.1.A1_at	BU551279		0	No Homology to Known Proteins			CTGGCTTCTGGCGTGGATGATTTTGGTCCCGAAGATTTCGGTGATGAAGATTTCAATCCTATGGAGGCTGCCTTGTTATCAATGATGATGCATTCTAATATGGAAGATGAAGATGACGACGATGATGAAGAAGAAGAATACAGTGATGAAGACTACTAGATTTACTTAGTTCATATAAAACCCATCTATAGACCAGTTGTTGAGGTAGTTATCTTTGGCAGTATGGTATCCTATCACTTTGCTTTAAAAAGTATTGGGGGCAGGAACTTCAAGATTTATTCTCGTTTATTTTGCTTATACTCATGCCTATACCTGGTATTTGTGATCATATGCCAT
GmaAffx.1301.58.S1_s_at	BI945616		0	No Homology to Known Proteins			GTATTGTATTGATGCGCCCCGCTTTAATTATCAGTTATAAGAATTAAGATAGCATGTCTTTGC
GmaAffx.1301.74.S1_s_at	AW704103		0	No Homology to Known Proteins			TGAGTCAGGATCCACCAACACCACTTCACNANCAAAGCCTAGTGGAGCTGTAACTGTTTCCAGTGGCATTGGCCTTTTGGTGGGGTCTTTCTTTGTGTCAGCAATTATGTTTGGTTTCATGGGCTAGGGAAGAGGCAGTGCTGTTTTTTTTTTATTCTCCTTTTTATTAATATGTTATTNTTTTGCTNAGAGTTTNTNTGAATTTCATCATTTAATCCAGATGTATATCTAATCTTGA
GmaAffx.1301.110.A1_s_at	CD399897		0	No Homology to Known Proteins			GATAGTGTTGCATTGTGTTTAGACCAGTGGACTTTGTTTCTTGTTCAATTGAATCTCTTGACAATGTTGGTGTGGCTTGATGGCCNAACTAAGCTGATTCATAGGTTTGTTGTTCTGTGTTATTGTGTGGGTTTCGATTAATGAAATTTACTGTGCGAATGAGCTAAAGTGGCTCATAAATGTTCTCTNATCTTTATTATTGTGTTCATTTCATGATGCTGACTTTATTGAAATGACNNNGGGGATCATATATAGCATTGGTCTTGTTCCATGTGATGGAATTATTAAGTAAANNANNANNNNNNNNGTTAGTTTTCTTTGTTTCTAGAAATGTACGAGAGTATTTGGTTTT
GmaAffx.14750.1.S1_s_at	BQ081552		0	No Homology to Known Proteins			GAAACTTGAAAGTCTTCTCGTGGTCTTTCTTGTAGCCTC
GmaAffx.14960.1.S1_s_at	BQ630244		0	No Homology to Known Proteins			GACATTCCTTCCATGGCTGGTGGAGTTTTCTGAACCGCTTTTTCTTTGGTCTCCCTGTGTGTAAATAAAGCTACAAGTTGTTTTTCTCTGTTTTTGATTTTTGTTGCATTTGTTGTTCTCTTGTTGGACACATCCCCCCATGTGTCTGAAAA
GmaAffx.14030.1.S1_at	BE021503		0	No Homology to Known Proteins			TGGCTCTGGCTCTTCGTCATATTCAAGTTCTGGCTCCTCTTCTTCTTCATCAGGGNCAGGCTCTGGAGCAGGTTCTGAAGCTGGTTCCTATGCAGGATCTCATGCTGGCTCAGGCTCCTCTAGAGCGGGTTCTGAAGCAGGTTCATACGCAGGGTCTCATGCAGGATCAGGATCATACGGTGGTAATGGAAAGTAATTAATTAAATGCATGCCAGTTAAACCATATCAATTATATGCATGCTGTCCTGTGGAGAAAAGAACAAGTCGGTGTCTTTGTTAGTTCACTAGAATTATACTTTAGTAAGTAAGCAAAAATAAGTTGATGCATGTGTTGTGTCCATCCTGTTCTTTTTCTTTTGTACAAGTAGGAATCGTGCTTCTCCCTGTGTCCAATATGCA…
GmaAffx.14141.1.A1_at	BI973009		0	No Homology to Known Proteins			TGTTGCCAGTGCCACTTCCCTAAGTGGCAATATGGCATCATTGGACAATATATGCCTTGTAAAAGTTACAATACCAGAGCCACTGTTCATTGAGGCCGGTGTTGGGAACTGCTTCACTATCTTGTATGTTGTATAGTACAAAATATAGGAGGAAAATCCCCCCCACCCCCAAAATAATCATAAAGGAAAAAGTATAGGTTAAAAATTGAAATAAATATAGAATATAGAGGGGGGGTAATTTACGCTGGTGTAACTCATATCATATGTGTTGGTATCAGATGCGCAATGTACAAAGTGGCTT
GmaAffx.92646.1.S1_s_at	CF808371		0	No Homology to Known Proteins			TTGAATGGCCTGAAACAAAAGTTGAAGTTTGTAATTGCTTGGTTCCTTGTTGGTTTTAGTTTTATTTTTGTGATAAAGAATTTGGTCATTTGAGGACCAAATCCAAACCCTTGCCAACATTTAAATTTTTTCTCACAACGCATAACGATTGAGTTCATCTGAATGTACTT
GmaAffx.92838.1.S1_s_at	CF806809		0	No Homology to Known Proteins			GCTTTTCTATTTATTGTGGCATTTTTGTGTTGTACCCTGTTGTTGTGTTTGC
GmaAffx.92830.1.S1_s_at	CF807748		0	No Homology to Known Proteins			CTTACCACTATTAGCTAGCATAGCTCTATGGATATGAA
GmaAffx.92743.1.S1_s_at	CF808468		0	No Homology to Known Proteins			TTTTGTTCGCTTCAGTCTGCAACGTCGCTATGTCGGACTCCACCGCCAAAC
GmaAffx.93125.1.S1_at	CF808797		0	No Homology to Known Proteins			GCAATAACTTGCAGTGTTTACCTTGGAAATCACACTAGTTAATTATTTTCTGTATCTTTCCTTGTATTCCATTAGCTGTATATTGAGTTTTGAAATATTATACAAAATTAAGCAGTCGGTGTTCTGTTCTGTGAAATGTGAAC
GmaAffx.93125.1.S1_s_at	CF808797		0	No Homology to Known Proteins			TATCATATGGGTGTGACTAAGCCTCATGTGCTTATGCTGTTGATCATCATGGTTGTCTCAATTGCAGAGAAACCATCAGTAATAGAAGGAAGGGCTCTTTCCTTGATATCTGGTCA
GmaAffx.93125.1.S1_x_at	CF808797		0	No Homology to Known Proteins			ATGGGTGTGACTAAGCCTCATGTGCTTATGCTGTTGATCATCATGGTTGTCTCAATTGCAGAGAAACCATCAGTAATAGAAGGAAGGGCTCTTTCCTTGATATCTGGTCAAGGGTACTCAAAGATTTTTGCAACGCTTGGACTTGTATGCAAGTGTTGTGATGGGGTTGGAGGTGCCTGCACTAGTACATGGACAGAATCTTGCAATAACTTGCAGTGTTTACCTTGGAAATCACACTAGTTAATTATTTTCTGTATCTTTCCTTGTATTCCATTAGCTGTATATTGAGTTTTGAAATATTATACAAAATTAAGCAGTCGGTGTTCTGTTCTGTGAAATGTGAA
GmaAffx.92943.1.A1_s_at	CF808668		0	No Homology to Known Proteins			GGTTTAAGTGCTGCTGTTTATTATGTTTTAAAATGATGTATTGAACTCGTTTCAGCGAAAGTATGT
GmaAffx.93575.1.S1_s_at	CF808812		0	No Homology to Known Proteins			GGTCATCCTATAGGATCATGGCTTTGTGAGTCNCCTTNNNACTCATACATGANNNTTCCTGNNNGTGACTCNGGTAGGTTTCAAATTCAAGCACCNGCTNCTNNNNNNNNNNNNGCTTCACCCTCTTCCACCAACCCTAATTCTTCTTCTGCTACACAAATCATTGTTTCCTCTGGTGTTCAGTCCCCACATCAGTGTNTNACACATCGTCGAATTGCAGCATGAA
GmaAffx.9539.1.S1_at	BI972166		0	No Homology to Known Proteins			TAATATTGCCCTCTCATGTTTTATTGGTATTCTTTTTTATGCTGNNNANNNNNNNNAANTTCCACGGTCAATTAGTAGTTCATAATAATCAATGTTTT
GmaAffx.93298.1.A1_at	CF809023		0	No Homology to Known Proteins			TTTCCTTTTCCATTCCTGGAATTTGGAAATTTAGTTAGAGTATATGTTTATGAAATCAAGCCATCCAAGAAAGAGTGGCCAGGATTGTTGTCACATTGTTTTTGTAGAATTCTGATGGCGCTGTCTTGACACAATAAAGAGTGTTTTTCATTTGACTGTTACTAA
GmaAffx.93298.1.A1_x_at	CF809023		0	No Homology to Known Proteins			TTTCCTTTTCCATTCCTGGAATTTGGAAATTTAGTTAGAGTATATGTTTATGAAATCAAGCCATCCAAGAAAGAGTGGCCAGGATTGTTGTCACATTGTTTTTGTAGAATTCTGATGGCGCTGTCTTGACACAATAAAGAGTGTTTTTCATTTGACTGTTACTAA
GmaAffx.93439.1.S1_s_at	CF807894		0	No Homology to Known Proteins			AGTTGTAAAGCACTCTGCGCTCTCTCTGCATGATCATG
GmaAffx.93153.1.S1_s_at	CF805913		0	No Homology to Known Proteins			ACTTTTACTACTCATCTCTCCTGAGCTTGCAAGTGCTGCCCAACCTAGTCTTATTCTTCAACTCGGCCGAAAACTTTTCCAATGCGGCAGCGCCGCCGTCCCTGTTCGTGGAAATACCCCATCCAATGGCCGCTCCTAGAGGATATACCCCACCACCAAAACACCCACTCTATGGCTGAATATTTGAGATGTTAGCATCCTTCTTTAATTTTGTGATAAAAAAAATACTTTTAAAGATGTATAATTGTGTGTCATTACTATAATATATGTCATGTATGCTTAATTTCACTGAACCATGTGTACTACTGCTTATCGGTCACGTCCATTTAGTGGCCACACCTGTATCCAG
GmaAffx.92479.1.S1_s_at	CF808204		0	No Homology to Known Proteins			TTGTGGTTCTGGTTTTAGAATCTCATTGCTTGAAAATAAACTATTGTACTGAAATGTCAAGCTTGTGTGTTG
GmaAffx.92561.1.S1_s_at	CF808286		0	No Homology to Known Proteins			CTTGAGCTTTTTGGAGGGCTTGTTTCTTTTGTTGAGGAATTGGATTGATTTGTTTCATTGATGTATTGCTTGGTTTGTTATGAAAATTTATCTTAAGGGGGGTCTATTATTCTCCTAACTCAGTGTAATGTATTCAT
GmaAffx.92225.1.S1_x_at	CF807950		0	No Homology to Known Proteins			GGAGGAGGCGGCGAACCCGATACGAATGGTGGCGGG
GmaAffx.92128.1.S1_s_at	CF807853		0	No Homology to Known Proteins			AGTATTGGGATAGTGTGTTTTTCATTTTGGTGTTGTTATTGGCAGTTTTATTAAGTGTTGTTTGCTTTTTATTACTGATCCTTTTGTCATCAGCCTGGGCTGTGTGTCTTCGGTTGTGTTGGAGACTGAAA
GmaAffx.91930.1.S1_s_at	CF807655		0	No Homology to Known Proteins			TCTTCGTAGCCATGGTCTTGGCTTAAAAACTTTCGAGAGAAGCATTGTCTTTGATGATTCGTCCACGTGGAGGCTTTTCCGCCCTTGATCCTTCTTTCCCGCACACGGACGGACGAGATCCATTTGATTTGTTTCATCCTCTGGTCATATGTTGAGTTAGCGGTTTTATTTTCTTCG
GmaAffx.9168.1.S1_s_at	BI424415		0	No Homology to Known Proteins			CACCTTATTTTCACACTGAACCTACAAACTTTTAGCAGCCACATGTATTCTGGTAGAACTATAGTTTGAGTTGTCGTCGGGTTGGACAATTTAATACCCCATTTGAATGGTATCTTCTTA
GmaAffx.91665.1.S1_x_at	CF807390		0	No Homology to Known Proteins			TTATGTGGGCTAAAATGGATTCTGCTTGTAGGTCTGTATACCCTTTTGTAATGTAAAGTGA
GmaAffx.91701.1.S1_x_at	CF807426		0	No Homology to Known Proteins			TGAACCGTGTTAATTGGATTTTAGAAAAACCAAAAAGAAAAAATAGATTGGTAGCTATTTGGGCATGCCTTGTAATATGCCTATACTTGTTTTTACATATTCAGCGTCGTGGTATTGTGTTGAGTTAGTAGTGCGTTCGTGGT
GmaAffx.91128.1.S1_s_at	CF806853		0	No Homology to Known Proteins			TGTTATTGTGTCTCTTATATCATACTTTTTTT
GmaAffx.91276.1.S1_at	CF807001		0	No Homology to Known Proteins			AAACTTGCTTCTCACGATTCAAAGATCTACTTAGTTAGGTTTTGTGAACATTCAGGGTAGTTAATTCCCCCCCTTTCTATGAAAGAATTTGTATTCATGGTATTATGGATGCCAGTATGCATTATGCAGTTACAGAAAATCTTAATGTCCACTCGTTTTATTATACATGAAGAATTGGTGATTGATAGTGAATCTCATTGTCGGTACACATGTTATTGATTGGA
GmaAffx.91410.1.S1_s_at	CF807135		0	No Homology to Known Proteins			GTTAATATGTGTACTGGTTCATACTATATATTTTCAAAGTGGGGTGCCGAAGCAGCGTGCGGCCAATCTGCTGTGTCAATGTGTTCTTTCTTTTTTATCGTTTCCAATTTGTTTTTGAAGTACTTCTCCAATTTCTGGTCACCAAATGGGGGGCCAAGGATTCTTCTATTTGTAGGGTAGTGGCACTTTCAAAGAAGGCCAAGGATTCTATTTGTAGGGTAGTGGCACTTTCAAAGAGTTTCTTTCTCT
GmaAffx.99.2.A1_s_at	BE330213		0	No Homology to Known Proteins			GTTCTGTCCTAAGTTACTTGAAACTTTGACCTGGTATTTTGATTTTAATGGTGAGACGTGTGCTACTGCTACATCATAATTCCCATCAAATTTAATTATCGATGGGTTAGAATTTCATTAA
GmaAffx.90603.1.S1_s_at	CF806328		0	No Homology to Known Proteins			GAGGAAGTAGACGAGCCCCTCAGTCCGGGCAAACACATGAAAACTGCACAAAGTGTTTTATCACTTTTGATAGCGACTATTGCGCTTCTTTGGATTCTCACCGACCTATGCAGCCTGTTATCAATTATCAAGCTTCAGCCAGAACATGGCCCCCTCCCCATTCGGTTTTCTTTGCTTGAACCTGTTGGTTTCATGGTGTTTGTTTGGGCTGTTGCAGCAATGATTGTTATTGGTGCACCATTTTCTCGTTTGGTGAGTGCCATTCTTTTATTTTGGGGTATTTGGCTGCTTGTCAGATCTTCTCAATCACTCACTACACTATGCCTTCCAATATTGGGAATCCTTCTGATGGTGTGGCATCTCTGCTCAAGGAAAAGCAGCTGCCAAATAAAGGGTAAT…
GmaAffx.90760.1.S1_s_at	CF806485		0	No Homology to Known Proteins			TAGCTACTAAACCTGAAATGGTCTGTAACAGTGTGACTTGAAAGTTGTGTGCATCTGTCCACGTCT
GmaAffx.90868.1.S1_s_at	CF806065		0	No Homology to Known Proteins			GACCATAATCTCTGGACCCTCTGGACCCTCTGGAACCTCTGGAACCTCTGGAGCCTTATACAACTATGCTGGGAATGGGAATAGCAAGACCCAAACTAAGAATGGAAACCTTCTTGGCAACCGTCTTGGCAATGAAAAGTGACAACAATCAGAACAAGAAAAAGACTTTCAAGTGAAAACTCACTCACTTACTTGCTTCTTGGACAGACAGTTTCATTTCAATAGCTTTGGTGAATAGTACATACATGATGATGCTCTAGTAAAAGTGTTTTGCTTGTTTCTTAAATTACTATTACAGTATTATGCTTTGGNTTTTCTTTCTAGTACAAAAATGAATTGCGGTGTGTGAATTTGTGAA
GmaAffx.91064.1.S1_x_at	CF806789		0	No Homology to Known Proteins			TGGTTTCGTGTTACCGTGGTTCTTGTTTTTGACCAATATATCTGGTTGTTTATAGTTG
GmaAffx.9046.1.S1_at	BI970613		0	No Homology to Known Proteins			GCCTTTTCTTACTACCTGGCAGATTTATGTTTTTGATTAACCAACCCTACTTTGGATTTTGAAGCTGCATTATCTTGGTTGGTTGAGGAAACCAAGTAGTGTGTACACAAATTGTGATTGAGGGATGCCGGGTGGGGAGGTGAATCCTGATAAGGTCAATATACCTTATCTACAACTATAACCTTGCTTGAGACAATGGTTTTTGNTATTTAATGTTCTCACAGTCGAGTCAAAAACTGGAATTTCGTGCTATTTTTATCGTGGTCGTTTACGCTAGTCGGGTTTTGAAATTTGTTTCCCTCTTTGAATTGGTGTTCACTGCTTGCGAAATTATTGGGGACATTATGTAGTGTTTATGCTACATGCAATGATAATACTCTTGTTGGGAACATTATGTAG…
GmaAffx.90320.1.S1_s_at	CF806045		0	No Homology to Known Proteins			CAGCCCAGATCGTACGCTAAGGTCCCTAAGCAATCACTTAGTGGA
GmaAffx.90138.1.S1_x_at	CF805863		0	No Homology to Known Proteins			TCCAATCCAGCAAAGGTTGTTGTTTGGTGTGTAATGTTTTAGGTTACTATGTACCT
GmaAffx.86228.1.S1_at	BG237484		0	No Homology to Known Proteins			GGTGTGACTCTTTTGATGCCTGAACATACTAGAATCCTTTCCCTTTTCATAGATGTAATTGTGTTATGTGCTCTGGAAAGGACCATGATA
GmaAffx.85382.1.S1_s_at	BI945154		0	No Homology to Known Proteins			AGACCTGGAACTTCACCTTTCTACGTACGTGTGCTGTTAGGATGCAGTGTGCTTTGATGATGCTTTGATGAATATGCAGTGTGCTTTTTT
GmaAffx.86675.1.S1_at	BI424294		0	No Homology to Known Proteins			GGTTTTGAGATTACACTTCTCTGATCTTTTCTCTCCAAAATCAAGATCAAAATCTGTAGAACCCTTTTCCTCCTTAGANNNTCTCTCTCTCTTAATTTCTAATTATATCTGACTTTTATCCTCTCACATCCACAAATGTTTTTCTCAAAGAATGTTCGTAGATTCTTCAAATTCAGAGGCCAGGTTTTTTGCCCATGTCTTNTATACTGTCTTTTCAATTTCTGATAACCTATTCACCCTCATCAAACTCTNTTCATCATCATCCACAAGAATTTTCAACCAAAACACTCATTAGTCTTTTGGCTCAACACTCAACAANTTTCTTTGGTGTGACCTTATTGCGGGACAACACACAATAATCATT
GmaAffx.88383.1.S1_s_at	CA802642		0	No Homology to Known Proteins			AAGCTACTGGATGACCTTCATTCCTNNTNTANGNNAGTTTTGTCTATCGTTTTCCTTTATATTTGTTATGAGCTGCTTTTGAAGCTTGGACAGCACCTTTTGCTTGGTATACTATGTTTCA
GmaAffx.88177.1.S1_s_at	BU764117		0	No Homology to Known Proteins			GAGGTGGTAAGTCTTGGTCATTCTTGTAACTCTTTGGTCTTTCCCCTCTACCCTAAATCCTGGTCTGTGCATAGCTTCTGTGATGTGGTCTATATC
GmaAffx.87086.1.S1_at	BM091829		0	No Homology to Known Proteins			AAATACATGTCCCTTTTCCTCCTAGTAATACTAGGGATGGCTTTTCTGGCCACTACTTCCCTTGCTGATCGTCGTTTTCTTTCGGTGGAAGATGGTCATGATCACCATCACCACCACCCACCAAAAAAACACTGGCCTCCAACCACACAAAATGAACCTTCAAACGTAGAAAACAAGGAGAACACTGAGGTGGAGGATGGTCATGATCATCACCATCACTACCCACCTAAAAAA
GmaAffx.8804.1.S1_s_at	BG362617		0	No Homology to Known Proteins			TTCTACCATTGTGAAAATTTCCTGCGACTTGAGAGGCGTGCCCTTGTGCTTTATAAGCAGTCCTGTGTAATGTGTATGCAGTCATGTCAGATACCATTAGTATGTGTATGTTAAATAGTTGCTGCTTATTTTATACA
GmaAffx.88733.1.A1_s_at	CK605991		0	No Homology to Known Proteins			AAAATTGCTCTCTAGGTGTGCCTTCGTGCTTTTAATGTAATTCTCCCTGCTTGCAGGCAGGTTGCAACATGTTTTAAGTTAATCATGTTAATGTGCATTATTGTGAGATCCTAAAGGATCATAAAAACTGCGTCTATCATTATAAGAA
GmaAffx.8889.1.S1_s_at	BG509533		0	No Homology to Known Proteins			ATGAAATAAGTAGTCCTGCTGCTTTTGTATGAATAAGTTGTCTCGCATTTTATCATTGTGCGTTTTGTATCAGTACCAGTNATCAACTTGTTTTCTTGCTTTTATGGGTTCTTTTGTTGACTTAAAACCGCAATTGAAACCTCATT
GmaAffx.88979.1.A1_s_at	CK605704		0	No Homology to Known Proteins			GCATGTTCATGTCCTTGGCCGTCATCCTCTTCATCGCCCTCTTCTCCGCCACCGTCTCTGCTCAGGGCTCCCCAACACCGGCTCCCGATGGCGGAGCAGCCGGAACAGTTTCAAGCTCCGCCTCCATGATCGGGGCTGCGGTTGTGATCACCATGCTTGCCATCTTCAAGCACTGAGTCATCCGTTTCTATATACAGCTTTACCGAGTGATGTTTATTGTGAGTTTGGTGTTTGTATATATATACAGAATATGAGGGAATTTTTAAGGTATTTTGTGTTATTTATTGTAGCTCATAGGGGGAAATAAGAAGGATCTTATATGTCTTTTCCTACGTACGTTTAT
GmaAffx.89473.2.S1_s_at	CK605927		0	No Homology to Known Proteins			TCCACCCTACCACTACTAGAATATAGCCCTTTCATATCACACCCCCACATGGATGTATACAGAAAGTGTGNAAATGAAAGCCNTGNAGGGGGNAGGTGCAGTTGCNGTTTGCAAATCCACAAAGAAGTATANATGTTNGANTANTGTTATTGTTTAGAGGACTCTGTCTA
GmaAffx.89126.1.S1_x_at	CK605598		0	No Homology to Known Proteins			GAGACTGAAGCAGGGCGTCTCTGCACCTGGAGAGTAGAACTTTTTCCTCACTNTATATTCTGTGATGTTAAATTGTACTCT
GmaAffx.89191.1.A1_at	CK606438		0	No Homology to Known Proteins			AGGGTTCTGTTTTCTTTTCGCGATGAGGGCCAAGT
GmaAffx.89191.1.A1_s_at	CK606438		0	No Homology to Known Proteins			TGTTGGATTTTATTTCGTCTTATGTTCTTAGC
GmaAffx.89191.1.A1_x_at	CK606438		0	No Homology to Known Proteins			AGGGTTCTGTTTTCTTTTCGCGATGAGGGCCAAGTGGAAGAAGAAGCGTATGAGGAGGCTGAAGAGGAAGCGCCGAAAGATGAGACAGAGATCCAAGTAGTGCGTTAAACCTAGTTTGTTTCCGTTGCTTTTACAATTGCTTATGTTGTCAAATAGGACACCCAGTTGTTNGTGGCACTGGTCTCTCCTTTTTGATGTTTTGATACATTTTGTTGGATTTTATTTCGTCTTATGTTCTTAGC
GmaAffx.89630.1.A1_s_at	CK606252		0	No Homology to Known Proteins			AAGCTCTATACCTGTCCCGTCTCTGAAGACATCATTGTTCTTATGTGCTTGGTTGTAATTGAGGCTGCTATTGGTGGTCNGTAACTCAGTATCTTTAAGTTGTATGCTATTTGAAAC
GmaAffx.89665.1.A1_s_at	CK606059		0	No Homology to Known Proteins			TGCCCGCGACGTTGTGAGAAGTCCACTGAACCTTATCATTTAGAG
GmaAffx.50677.1.S1_s_at	BI971744		0	No Homology to Known Proteins			CTGTAGTGTAGCATGCGAGTGTATTGGTGGTAATTCAAAAGTTTGTATTAATCTCTT
GmaAffx.51455.1.S1_at	BQ627628		0	No Homology to Known Proteins			TAATAGACAATACTTGATTATCATCTGGTTTTGTCTAATTCTACCCTTTTATTTTCTTTTCTCTTTTTTATTTTGTTTTGCATATTTTCCCATATTCAGANNNNNNNGTTAGCTGCAAAAATTGTCTATAGAGTCTTTTATTTTTTGCTAATGTGGGTTTCTTCTCAAATCTGTTGCTCACAATCCTTTCTGAAGCATGGATCAATCTTCAATTGCTNAGAAGGAAANGAGTTATAATAAAAGAGTATCCTAAGAATTGGCCAGTGGACAAGATACAAAGACCATTA
GmaAffx.51464.1.S1_at	BQ628397		0	No Homology to Known Proteins			TCTCCCAAATACATGCTAGTGTTGTTGATAGCATTGGTTTTGGCAGTCTCGTCCCTTTCCCATGGTCCAGTACACGGTTCAGTACACCCAAGGCCTCATCCTCCTCCAAAAATTACTCGATACTCCGCGCCACATATACATAAACCAAAACCACCAAACGTGGCAACAACAAACACCTATGCAGCAAANAANCCTCCAACTAAAGGTTGAACTGTTAGGCTATGATCAAAGGTTTTGCAACGTCAAGGGAGTATATTACAACAGTAATCGCAATTTGAAACCTTGACTANAGATACTTTAATGGCATATAGTATTAATTAATGGTCAGTGCTATGAGTATGCATGTATGATTAAATAATAGTTAGTTAGGAGTTTGTTTGAACTGTTGTAATACCTTGT…
GmaAffx.51535.1.S1_at	BI701497		0	No Homology to Known Proteins			GTCCTTATACCATATGGAGGTGATTAAATGGAGCTCCACTGTGAATTTCAGCTAGTGATTGTGGGTCTTTTGGGTGGCCATGGTGATATGGGGTATGGTAGCAGTAACTACTACCTACCAATACCCTTTTTTTTNGTTCATTGTATCTCGTGAGCTTGGTTCTTATCCCAAATGGATAGCATAATTTATAGCATTGAGTTTTAAATGTTACCAATAGAAAAAATATTTATTTTAGATTAACTCTTTAATATCATTGATTCTGCTGTATATCCGTTAATGCACCGTTATTTGTGAAAAGCTCCT
GmaAffx.5160.1.S1_at	BM270197		0	No Homology to Known Proteins			ATCTCTTCCGATGAGCCATGTATTAAGTGCCCTTTACATATGCTTCTTATTCTTATTCGTATCCGGTTTATGTTTATATGTATAAGACATTTATAAAATCAGGGTTTTCAGTAACCTTTATGTTACTGTCTCTGTTTTGTTTCACTTTTCTTTCTCTTCTAATAAATTTCTTTGCTCTTCT
GmaAffx.54898.1.S1_s_at	BQ452830		0	No Homology to Known Proteins			GAGTCTGAGTGTATCACCTCTAAGCTACGATCTTCATGACTCATATGAGGTTGCTTCTATTTATTTGGTGGCCATTTTTCAAGTGTTGTTCTTACTAAGTTCAAGGAAGCGACAAATCAAAAAGATTCAAGACAAGGAAGCAAGATTAGAAATGTTGATATCAATTCAGGCTGCT
GmaAffx.55090.1.A1_at	BI967937		0	No Homology to Known Proteins			TACGACGTCGGATCGGGATGGAACAACTTTGGTGCAGCCGGTGGCCGGTGAATCATGATTAGGGGTTATTATTTTTTTTAATTCGCAATTTTAAATAAAATTGAAAAAATATAGGCAGGTGGAGGTTTGAAAATTGAAATGTGTTATGGCCGAAATGTAACTTTGGCTGGCAATTGTCTAGTGGGGCACAAATGGATGTGGAACACATGTGTGACCNAAGGGTGCATTGCAAGTTAATGATGTA
GmaAffx.55403.1.S1_at	BM271453		0	No Homology to Known Proteins			ATATATACTTCCTCTTAAACTCCCAAAGTTTTTCAAGATGATTACTGTACCGACCTTTGTTTTTATCCTCAAGTCCTCTACATTTTTGTGGTTAGTATATTGAG
GmaAffx.55834.1.S1_s_at	BQ453267		0	No Homology to Known Proteins			CAGTGAATTTCTGATCGCACCTAATATATTGTCTTTCGATAGGTTTGACAGAATTTTTCATCGTTCTACAGTTTTGT
GmaAffx.53957.1.S1_at	BF008940		0	No Homology to Known Proteins			GTGGTCTCAGACGTTTACATGTGTCTCAGTGGCATGTAAAACTAGCTTTTCACATATTGCTTTCATATGAAGATTGCTCGTCATGATTTGCTCCTTATCGTTAAGTCGTTGTT
GmaAffx.5401.1.S1_s_at	BM732974		0	No Homology to Known Proteins			GCTGTGGATCCATAAGGTAGACAACGAGTTCNAAAAGAGAGAAAAAAANGGAAATTAAAAAAGAAAAGAATTTGCTTTTTTATCTGTTGCCTTTTTTTTTTTTNNGCCGTAAATGTAGAATTTGCTTCGTGTAATTTGACATTTTGACGTGCTTTCTTCATCTTCATTTTTACTGCCCATATGTTGGGTGAGCTGTAGCCA
GmaAffx.6418.1.S1_at	CA935147		0	No Homology to Known Proteins			TATGCTTCGCTGCTTCTGTTACAGACCCAAACGGAATGGCAATATATATTTTGACCATTGTCTGAACTACTATTTTGTTTTAGCTGTGTTAA
GmaAffx.64231.1.S1_s_at	BI786484		0	No Homology to Known Proteins			GAGTTTCGTTTCAGTTTTTGATCACCATGAGAGCTAAGTGGAAGAAGAAGCGTATGAGGAGGTTGAAGAGGAAGCGCCGAAAGATGAGGCAGAGATCGAAGTAGTGTGCTTGTTTCCCCAGCAACTATTGCTACTAGTTTTGTTTTATTTNAGCTATGTTTTTGTTTCCAAATGTTACGATACATTTTTATTGGTTTCTCTTGCTTTTGTCTTACCTCAAAAAAGATGCTCTTACCGCAAATTAATT
GmaAffx.61061.1.S1_s_at	CA782177		0	No Homology to Known Proteins			ATTTTAGTCCCTAGTCAAAATGCTGATTTTTGTCGTGTGTCTTTTTCTTATGTCTTTGGTTTCTATCCTATTTCTGTTATAGCTGTTTTGGTTGGGATCTTCAACACTGAAACTTAATGCTTGATTTTGTTACACA
GmaAffx.60419.1.S1_s_at	BQ611901		0	No Homology to Known Proteins			CCCCTGATTACATTTTTGTTAAGCGCAGCGAGTTT
GmaAffx.60419.1.S1_x_at	BQ611901		0	No Homology to Known Proteins			AATTGCTTTTATTTATCTGTGTTTTAATGTGTTGTGTTTGTCGGAACCCCTGATTACATTTTTGTTAAGCGCAGCGAGTTTCAGGACTTTGCTGCGTTGTGTTGCTTTGGTTTATTAAATGTCAACTTTCTAT
GmaAffx.65750.1.S1_at	CA935827		0	No Homology to Known Proteins			ATTTCTCTGAATGCTTTCCACTTTGGAAGGNAAAAAACAGTAACTGAAAANTCANGATTTGTCATTTGCTTGAATTCTCTGGGGCCAGANGTTGTTGNGCAGCTGTTTTATTTCATCACTTGTTCTAATTGCTTCTTNTTAGGAGCATGGTTTCTTTCTTCTNTGAGAAAGGNCAATTGTTTTGAGAAAGGAAACTGTTCATTCAAACTCTGGGTTGTGATGGG
GmaAffx.65918.1.A1_at	CD412482		0	No Homology to Known Proteins			GATTGCGATATTATACCCTTGCGGACCTAGCTTCGATCTTTAGTTCTTACCGACTATATATAGCTA
GmaAffx.65026.1.S1_at	BQ612000		0	No Homology to Known Proteins			TAAATCTCTTGTTAGTTTTCTTTGTTTGGGGGTAGTTTTTTATGTTCAAATGTGAACTTAAATTAGAATATGTTTTTTGCAGTAGATACTGTTTTGTTACTTCTAGTTTCTTGTCCGGTGTATAGATGTGGTGTGTGGATTTGTGGAAGCTACTTCTTTATGTAAATTT
GmaAffx.66239.1.S1_at	AW101381		0	No Homology to Known Proteins			ATGGTTGTACATGCTGTATCCGTGTTTTGATTCTGTAACATTTATGCATGATTTGTTCCCCGTCAAAAAA
GmaAffx.59384.1.S1_at	AW184917		0	No Homology to Known Proteins			AACCATCACCGTCCGTGGGAATGATGATGCTTCATATGGAGGTGGAATTACAGTTAGTGGACAAAATTCACCTCTTGGTGGGCTTGGAAACTTGGATAATATTCCTTGCAGCGATTTCAATAGTGGAATCAATAGTAATAATGCTGTGAGCTCTATGACTAGCATGTGGCCTTAACGTTATTCTTATTGCACCACATGACTTGTGTTGTAGTAGTACTGTCCGGTTAGATCCAACTTTATGCATGTCTTGGTTTTATTAGATT
GmaAffx.5716.1.S1_at	BQ611417		0	No Homology to Known Proteins			TTTTGGAGATTAAAGGTCACAGATTGAANNNNNNNNGTGATGGAGATGGTAGTGGNGGGNCTTTGCTGTAAATGAGGACACTTTTTTTTNTNTCTCTCAAGTGTTGCACTCTCTCTTGGTGATTGAANGCANGCNCATTAGGCAACTGNGGTCCCACTTTCNNCCCTCCTTTTTNNCATTCTTTCAAGGTTGCACGCATATCATGCTGGCATCTACTCTAAAAGTAACAAGAAAGTNTCCTGATGTTTGGCANAGTGANCNTAGTGTTTCATNATGAGTTNCTNNGNCCCCCTTNGTTTGGATATNTAGCATTTTGTGGTAAAGGTTACTTTGTTTTACATGTTGAGGGNNAGNGNGGAATGATGANAAGNAATNCTAGTTTCTGCTTTGTAATTCATA…
GmaAffx.57755.1.S1_at	AW706534		0	No Homology to Known Proteins			TAATGGGATTCGTTCCATCTTTCGGGACTTGAGTGGATAATTTGATGCAATCATGTTTATGAATGGAAGATGGTGGTGCGCTACCTTTTTTGTAA
GmaAffx.5824.1.A1_s_at	BQ298207		0	No Homology to Known Proteins			AGATGGATTGTTGGTGGCTGCGGATGGTGTTTTGTTACTAAGTTTTCTTTTTGTTGAAGCCTATAGGTTATTAGGGAAAAATAGGTGTTTACTTGGTAGTCATATTAATTGTCATTGGCAAATACTGCCTAAGACACTGTGAAGGTCTGGTTGTTAGAAATTTGGCATGTATTTGATTTTTTTGGATCCTTTATTTCTCGTTTTATTTCTGGTTGTGCAGCCACTTT
GmaAffx.58988.1.S1_at	BG237453		0	No Homology to Known Proteins			TGCTTTTATGTGTTGCTGGTACCATTTAAGGTGATGTTTTGAGCCACAGGACATCGATTAGTGCAAATTATCTTGTTAGTCCTTCGCAAATTGGCATCGTAATTTTGTTTTGAACTGTTTTTGCTACTGATGAGTTATA
GmaAffx.59014.1.S1_s_at	AW733977		0	No Homology to Known Proteins			AGGAGAGCATCATGTTGGTGAGCACAAGCCGGAGCACCATGGAGGAGAAGAGCACAAAGAGGGGTNCCNNGACAAGATCAAGGACAAGATCCACGGCGAGGAGGGTGGCGCCACCGCCGAGGGCGAGAAGAAGAAGAAGAAGAAGGAGAAGAAGAAGCATGAACATGGCCATGACAGCAGCAGCAGCAGTGACAGTGATTAGATTATCTCCCACTGCTGCATCACCTATATATCTTATAAGGTGTATGGGACCATAGTAGTGAGGGCTGTGTCTTTCTCTTTTTTTCCTACTTGTCATTTATATTTATGAGCGAGAGAAATAGTGCGTGTATCTGGTTGCTAATTCGAGTGCTATTAGTCTGTGGTTTCGTTGGTTTGTAACCCCTCTGCTTTGGTTAT…
GmaAffx.60156.1.S1_s_at	BM523697		0	No Homology to Known Proteins			GATGATACATTGGACTGCTCCTTTGGAAAGTGTATAGGCCACTTTTGCTATGTTTTTTACATTCAAAGCAATTGGTTGTCTGCTTGAATTGTCATCATGTG
GmaAffx.59682.1.S1_s_at	BI945169		0	No Homology to Known Proteins			AACAACAGCCCTTGTACTGTGTGATGATATCAGTCTACTTTTATTCTCAGCTACTTTTAACTGTCTTTGGGATATGTTCATTGTTCAATACCGAATGATGAATATCGATCTTAATGTCTGTCTG
GmaAffx.59686.1.S1_at	BI945697		0	No Homology to Known Proteins			AAAGTTGCATTTCATAACTTGTAATTGAGCATTTGGAACATCTATAGGAAATACAAGGCTTCGATAGTCGGATTTTGTATGCTTCTTGATGAATTAATGCCCTTGTTGATTTTCCTGTAACTGGGAGAATTGTTTTGAAGTTCTTTAGATTCTGACCTTTATTGATTTGTGTTGAATTCTCTGTCAAATCCTTTATGCTAATGTGCACATCATTGAGTTTCCTTTT
GmaAffx.59763.1.S1_at	AW620896		0	No Homology to Known Proteins			GCTTCCTCTTTTTTATACTTTATTGATTGTATTTTGCCATATCATCCGACTTTTATATGTATTTT
GmaAffx.59763.1.S1_x_at	AW620896		0	No Homology to Known Proteins			CGCCATTTGTGGTGTTTGTTTGTATAATTAGGTTTATGTTTACTTAATAAAGCTTCTTAAGCTTCCTCTTTTTTATACTTTATTGATTGTATTTTGCCATATCATCCGACTTTTATATGTATTTTTTGGGCTGCTGAAACTGGTGCATGTAATGATTTGGCTAGCAATGCAGTGTATTTCATGGGTC
GmaAffx.68672.1.S1_s_at	BI945193		0	No Homology to Known Proteins			TATATAGTTTGTTTTCCTCTGGCCTTTGCTGATGATGCTGTGTCCATTTTTGTTTATCTTTTGTGCATATAGTATATAGTATATAGTATATATATGAATATGTTTACGAGTTCATCAGTTGAGCGGTTTAAGTCCTGAGACGATCGAGGTAGCTGTGTGTGTGGTTTAACAGCTCAGTCTTGTTTTACTGTTGAACTTGGTTATGGTTCTCAAGCTGTAAAT
GmaAffx.69055.1.S1_s_at	BI426205		0	No Homology to Known Proteins			TTCGCAGAATTACTAGATGACGTTTGGGAAGCAGTTTTCCATTTGGCTGCATAAGTTATTTTAGCTATTAAGGATTTCAGAGTTAGATATAATTTTTCTGTACTGTTATAGATCCTTGTTTCCTATTCTGGTTTTTAAGTTTTGATGGTGGTAGCAAGTATTTGGCGTTTTTGGTATTTCCTGGCGACATTTTTATACAGGACTGTAGTGAAAGTACTTGGATTTGAAGTATATGAAGAGTTATATGTGATTACCTTGTCTA
GmaAffx.69182.1.S1_s_at	BM525748		0	No Homology to Known Proteins			TTATTTGTTGTAGCTACGCTTGTCCATTCTTAGTTCCTCAATTGCTTCTCGGGT
GmaAffx.69688.11.A1_s_at	CD413010		0	No Homology to Known Proteins			GTTTCTGTGTTCATAATCGTTTCCGGATAGATTATATCTTGTCACCTCTCCTTCATGAACTAGTTAACGATTTGTGGAGTCGATTACATTGTTTGGTTGGATATTGTTTCTGGTCAGGTTATCCTTGTGTTATGTACCATGTTTAACCTTTGTTTCATCATATAGCTCCAAAGTAACATGTAAACTTTGGTGAATTG
GmaAffx.69979.1.S1_s_at	BU761302		0	No Homology to Known Proteins			TATACGGTATGCATCTATATCAGCATACATTTGAATAAAGTGTTACGAATGACATGATTCCGAGTGGTGTGCTTTTAACTGTATAGTGAAAGATTTGTGTCATGAACAAATCTATATTTGTCCATAATGGTCTGTTTGTGCATCTAAAATCATGAAAGATTTGTATGTGTTGTGACTGATCTTATTGAAAG
GmaAffx.70057.1.S1_s_at	BU765822		0	No Homology to Known Proteins			TTGTGTTAAATTTCCGATTATGAAATTGTGAGGTCTTGAGTTGTCCTCAGCAACAGATGCATTATGCTATTCTCTTTTGCTCTGTTTTCTGTTATTACATCNNNNNTNNTNNTTTTNNTTTTGTTTNATCTCCATGCATCATAATTGAAGTTATACATTTATACTCTGCCAGATGGTTCTTATGTAATGAGTTGTTTCCGTGTTAAGAAAGAACTGCTCTTTTAGAGTTCT
GmaAffx.70371.1.S1_s_at	CA935090		0	No Homology to Known Proteins			TCACCTTTGCAGTCACCTTCGTCAACTGTATGATGATGCTCTTTGTTCTTGATAGTCCTGAGAGCAGTATCAAATGTAATGCACAGTTGTTTCTCTTGAATAAA
GmaAffx.70659.1.A1_at	AI495240		0	No Homology to Known Proteins			CAAGGCGGTGGTGATTAAGGAATTATGTTGGAAAATATGTAATATAGTTTACTCAAATGAAAGAAAATGGTCTTCAGTGTTATAATTTGTGTAATAAAAAAGTAGTACGTGGTCTGTACTGTGTTGTCTGTACCAAAATAATAAACACATGCATGTAAGGGGGTGGACACCATGCATCCTGTGTGTTTTGTTGAAGAATCAAGTGAATTTCAGTTTGAAACAGTTTACAAAATTTGATCCATGACTCTAATTAATTAAGTCTGCCTATTTCATGATTAAA
GmaAffx.71137.1.S1_at	AW394482		0	No Homology to Known Proteins			CTTTATGAGAGATCATCTTAGGAGATGATTTTTATGTGTTTGTAAACGATTGGTCTGCTTTTAGGTGAAAGATCACTCGAGGGCAAATATGGCTGTAAGGAGCCTATGTGCCAATGTAAATAAATATTTAAATTTAGGCTTGTGTGACAAGTGAGGATGGTTATTCAGCAGCATTTACACCTCAACCTCAAAGCCTGTGTTTC
GmaAffx.71175.1.S1_s_at	AW424057		0	No Homology to Known Proteins			ATGTCTTGTAATCCTGATAACTCCATTAGCTTCTTAGTACTCTAGTAAATCTTTCGGAAATTTGACAGTCAGTTACTCTTATGATTTTTGTTTTCAGTTTGAGACGGATTGATATTGATTATGCTACAGTT
GmaAffx.7160.1.S1_x_at	BE059130		0	No Homology to Known Proteins			TGCTTTTTGTTATGGGGCAAATCACTGTTAGCTTTGGCTGTAATAANNCATATAATGCTTTGTATTATGAAATCTTAGTT
GmaAffx.73090.1.S1_at	BF423877		0	No Homology to Known Proteins			TGATTCAATATCATCCGCGCTTCTGAGGTTTCNCGATGAAGCATAACGGATCAAAATGGTTGAATTTCTTGATATGAGCCGTGTTTTTGATTTGTAAATACATGTGAAATTAATTTTGGTTGTACTTTTTTTTGTTTGTTTCAATTTTTGGTGTGATGGTTGGCTGTGAGGATAAATGTTTCAGCTTTAATGCCAGTTCTGCTTCTGAGAAATCGTGATTGATAGAGCTGTNATATATTCTGAGTCCGTATTTATGAAACTGCATCAAATATTTCTTTTCGAATGTTGTTCATGCGTGTATCTGTTTTTGAACTTTTGATATCAAATTGTATTAATTGCGTGCTTTGCGTTTTATCTTGATGGGATGGCTATTCTATAGGGTTACA
GmaAffx.74679.1.S1_at	CA782166		0	No Homology to Known Proteins			CTGCGCTATTTTCATGAACCATCTGTTTGCTTGCTTTGTGTGTTACTTTATCATATTCATTCCTTTGTATAAACTCGAATGAACTCTATACGTGGATGCGCAAA
GmaAffx.7517.1.S1_s_at	AW733377		0	No Homology to Known Proteins			GAAATTTTCTCTATCCTTACCATTAATTGGTAGTTTTTTAAGTAGAGACGTTCATGTGTCTCTCCCGTGTTGGCTAGACTTTTAGCACTTATTATTTTACCACCAAAAAAAATCTCCTTTAGAATATTGTATAA
GmaAffx.74170.1.S1_at	BQ611779		0	No Homology to Known Proteins			ATGAGCATGAGCCAAGCAGCTCGCCATCTTATGCAAACAACTGCACCAAATTTGCCTGGCATTCCCACTTTGCCTAAACCAACATTTCCACCTTTGCCTTCACTTCCAACACTGCCTCAGGGCAATGTTCCACCCTTGGCTACAATCCCAACACTGCCACAACCTACCCTACCATCTTTGCCTACCACTTTGCCTCCACTTCCCAGCAGCATCCCTACCATTCCTTCATTGCCCAACATTCCCTCAATCCCCACATTCACAATTCCAACCACTATGCCCTCCATTCCTTTCCTATCTCCACCACCTTCCACCTCTAGCCCTTAAAAATACCTTTAATTAATTCCTCTGACTTTGGTATCTCTGCCAAGTT
GmaAffx.74274.1.S1_at	BQ785389		0	No Homology to Known Proteins			TGTATGAACGTGTGTCTATGAGCTTCTCAATTTCGCTTCTCTCTCATTGATGTCTTTCTTAGACAGAAAACGTAGAAAAATAAGCAGGAGAGTTAAATGTGTAATAATCAACTTGGAGGTAATGTTTCTCAGTTAGTTACCTGTGTGTGTCCTTATGCCTTTCTGT
GmaAffx.73185.1.S1_at	BI701903		0	No Homology to Known Proteins			GGATTGCCTCATTGGTCATAGTTTGGAGTCAGAGTTCTCGTTTGGCTCCCATGTGGCAAGAATGCTCTATGATGTGAGCCAATCTGTGTCTGGCCAAACAGGGAATAGCAACAATGCTGCTGTTAATTGTCCAGAAAGCAATGGTTATCGTAGCTGCTTGCCATCTCAAAACGGTGGTGGCCCTAACCAAAATTGCGGTGATTACACCAGGACTTGCTAAGAAATATATTACCAGCAGGTATTTCANTTCTGATTTCAAGGTTGTCATATTATTGAGATTGTCATAATCTGAAGATGCGTGTAATAATTGTTGCTGTCGGTTCATACTTGTGTTGTGGATGTATTATTGTGTATCACATGTAGTCTTGGTTATTAAATGTTGATAAGAATAGTATTCCA…
GmaAffx.73401.1.S1_x_at	BI971895		0	No Homology to Known Proteins			TAAGAAACGTATCAGTTTTTGGTCTTAATAAGTGTTGCTCTGCTTTGCAATAAA
GmaAffx.73486.1.S1_s_at	BM092012		0	No Homology to Known Proteins			CATAGTACTTGAATTGGCATCGGGTTTGGGTTAACAACCCGTTTTGTCTATGTAGTCTTCAATAATAATTGGCCCTATCTGTATGGCCTCGATGATCTGGATATGACAGTACTACTATATGCTTAAT
GmaAffx.72149.1.A1_s_at	BE820147		0	No Homology to Known Proteins			TATAGTTTTTATTTGGTGCCTCATCTTTTTAACACTATTCCTGTGTTAAAACTCGGTGGTGTCACATCTTTGCTTTAAAATTCCGTGTTCT
GmaAffx.73658.1.S1_s_at	BM307163		0	No Homology to Known Proteins			GAAATGGTTTGCACTTTGCAGTCAAGATTATGTTGGTAGTGTTTTTATTTGATTTGTTTATGGTTGGCTCCACCACATGCTTCTAATGTTTGAATTTCATCATGGAAGACTTCCATCATTACATTATATTGAAGCATTTCTTGCGCTTAA
GmaAffx.80951.1.S1_at	BE608612		0	No Homology to Known Proteins			AAAGGTCTCGTGTTAAATGAATTGTGGTTCGTGTCTGTTAAATGGTGGTGGATGCANAAGTCTTTTAGTTTTATCTTTCTTTTTGTTTTGTTTTTTTGAGATATATAGGGTTTTTACTTTTTAAGTTTTTGTGATGTGAAAAAAATGTGTCTGTCAGTCTGTGTGTTGCATCTACCTACTTTTGTCAGTAATTGTTCTGGATATAACATCTTTTGTCAGTAATTGTTCTGGATATAACATCAATGAAGGAGAACAAGTATTACTTCCTCTGA
GmaAffx.78433.1.S1_s_at	BM954579		0	No Homology to Known Proteins			AAATATGTGTCTGTACTTTTCTCTATTACTCGTGTGGAAAACTGTGGACAATTAAACGTTCTATATGCAAGTGACTTTTTTCTTATGTGATTTACTTCCACAACTCTTGGTTAATTAGAAAGAGGATATATGTGTGCTTTATCAGGAG
GmaAffx.78601.1.S1_s_at	BQ627607		0	No Homology to Known Proteins			ATTCCTTGAGTGTTCCTTTTCTGTCTTGTGCATCCTTAGTCATTTCTCATTTTACTCTTCATAATTAAGTACTCATCTTCTCTTGTTTA
GmaAffx.79002.1.S1_s_at	BU761095		0	No Homology to Known Proteins			TCTCCTTTTTCCCATATTTTGGGAGAATGTGGTTATATATTTGTAGTCAGGGATGCTGTGATTTGTTACTGTTGGAATTTGTACGTCATTCCAGACACTTCACATATATTATAGGTTGTGCTTTGTTACT
GmaAffx.79047.1.S1_s_at	BU763803		0	No Homology to Known Proteins			ATACTATCATCGTTTCTCGATTCTCATTGCTGACGCAGTGGAACATTATATACTATATGTTTGTGTATATTTAACCGAGTTCGGTTGGCACTTGTTATGTGGACTCCCCCTTTGAGGG
GmaAffx.79325.1.S1_at	BU763860		0	No Homology to Known Proteins			TTCATAGCAACCAAGCCAAACCTTCTCCTGCTCCACAATCAAATTCCATCAATTAAACATCCCNATAGGCTTCTCTTCCATGGCAAATTACCATTCTTCTAAATCCTTGCATCTTCCATGCAAAACCTTATCTCTAGTTCTCCTTTTTGTTTACTTGCTACTTATTGGTTCTTGTGATGCAATAAGAATAGGCCAAACTATGAAGCTGNNNGAAANAAGAGAGATTNTCNNNNGAAAGCGCAATAACCAACATGGTTTTCCATACAAAAGCATGGTTTTCAACTTCTTCCCCAAAGGGCCGGTGCCACCTTCAGGTCCTTCAAAGAGGCATAACGCAGTGGTGGATTCAACACCTAATAATTGAAGTACATGAGAAGTCCTATTTGTTCAATTTTTCCA…
GmaAffx.80234.1.S1_s_at	AW396690		0	No Homology to Known Proteins			TACTCAAATGTTGATGGGTTATTTAGTTACTCATTGTTGATGTACTACCCCTATCTTGTATTAGTAAAAGAGAAAATTTGTGATGTGTACTCACCGTCGGTGGATTACCTCGTAGTAGTAA
GmaAffx.82582.1.S1_at	BM139949		0	No Homology to Known Proteins			TTTCTCCTCATTTCTGGATCACTTTTATCAACTTCCTTTGCAGGTAGAGTACGATCCAACTCTATCAAGAACTTCGCTAAAGATGTGAATGCAATCGAAGAGGGAACACCAAGGAAACCACTGAATAAGGAAGAAGTAAGAACCATCCATGAGAGGCTTCTTAGGGCTAACACAAAAGATTATGGACGATATGATCCATCCCCATCTCTTTCAAAGCCTCCTTTCAAGCTCATACCCAATTAACGTAACGTTCAATATGTGAATCTGGGAAGTTGGTATTGGCATAAAGTACCATAAATAATCGGCTGTTTATCTTAATCTTGTAATATAGTATGTCAAATATAGAAAAAGAAATACGGGCCATGTTTGGAACCCTAATAAGTTAGTAGCATAATTATA…
GmaAffx.83775.1.S1_s_at	BQ299690		0	No Homology to Known Proteins			CTCTCATTTTCTCTATAGCTAGATGGGTTCTGGTGCTTTACAACTTCTTCTGATCTTGGGTCTTCTGGCTAGCTCATGC
GmaAffx.84747.1.A1_at	AW349406		0	No Homology to Known Proteins			GAAAGTTTCATTCAAGATTCCGTATCATCGTTGCACAACTAGAAACTATCTTATTTTGCGTCTAGGGAATCATTTTCTTGAAAATTTATTTACATGTACTGTTTATTTTCTAGGTCCGAAATTTTGGATACTATTTTTGAAGTTGGAGTAGCCGTTTTTTTTGTCAGTTTCGTGTTAGCCTGAATTGATGTTTTACCATACT
GmaAffx.83798.1.S1_s_at	CA800345		0	No Homology to Known Proteins			ATATTTTATTTCTGGCTATTTCTGCTGTCATGGACCCATGTTTCTCCTTGGAAGAAATAA
GmaAffx.84342.1.S1_x_at	AF047053.1		0	No Homology to Known Proteins			AATTGTGTTTATTTTGTACTTCAAGTTATGAA
GmaAffx.8295.1.A1_at	BE822089		0	No Homology to Known Proteins			GTCTTTTGTGGTGTCATCGTGTTTTATTTTCGTTGCCTATGGAGTATGTATGCAATTTCTATTCTACCTATGTACTTGCAGAAGAAGTCTTTTAGGCCAATT
GmaAffx.83146.1.S1_s_at	AW156842		0	No Homology to Known Proteins			GATTGCTGTTAGTTTTCAAGGTTCTGTAGATTATGTGACAATGCAGCAGCAATATTTGGATTTGTCCCATATTCAC
GmaAffx.83590.1.S1_at	BI426380		0	No Homology to Known Proteins			TTTGCAAGAAAAGTTGCCTGATGACAAGTATGAATGAGTAAAATGTGAGTGATGATGATTCTATAATGCTCAATGATGTGATTGTGAATGTATCCTAATATCAAATAAAAATAAAAATAAATGTATGGTTAGACATTCTGATGACTTTGTCGATGTCTAAACTACAAAACTAGTACTGCCCGTGTGTTAT
GmaAffx.67622.2.S1_at	CA935044	At1g32790	1e-81	Post-Transcription			GTTCAACGGTTGAGGCTTCTTGGAGATTACCATCATTCAACTCGAATTGCTTTTGTTGAGTTCACAGTGGCTGAGAGTGCAATTGCAGCTCTAAGCTGTAGTGGGGTGATTNTGGGTTCACTGCCCATAAGGGTAAGTCCATCGAAGACACCAGTTCGNTCACGTGCTCCTCGNCCTNCTATGCACTGAATCAACTTTCCATGTTTCTGGGGTTGATTGCTGCTGAGATATATTTACATATATANATANACATAGAAACAGCTNTGTTCTAAGGAACATGTGGCATTTAGTTGGTACTTTTGTCCTCATGTCTTACAGTATGGTTACTTTGCTNCCCCTTGGGGGATTATGGNTCTCTGTTTTAGCTTGTAGTCGGATCGAACTTTGAGGATCTTGATG…
GmaAffx.71117.1.A1_at	AW349652	At1g60900	8e-15	Post-Transcription			ATTATGTGGTGTTTGGATTCTATCTTGATTAGCAAGGATAATCTTTTGTATTATTATCATAAACTTGTAAGCTAGAGTTGTGGTCATAGTACAGAAACTGTTCTATTTAGATGCGAGTAGTAAGAGAGACATGATGACAATTTGTTAAAATAGTTTTACCGGTCTACATGGATCTGTGTGGTCC
GmaAffx.5378.1.S1_at	BI969133	At5g61030	2e-05	Post-Transcription			ATGATAGACCTTCTGGACCTCAATCTGGCGGCGGCGGCGGTGGTGGTTATCGCAGTGGGGGTTTTGGCGGCGGGTGGTGATTTTGCTTCTCGCAATGGTGGTTGGTGATTCAATTTTTGTGTCTTCTGCTTAGTTTTGAGATTATTTTTTTTATGTTTATGCTTTGCACTTTGGTAAAGTAGTAATTAGTGAATTTTTATGCTTTTCCTCCTTACATTTCTTGGTGATGTTATTCTGTGATGTTAATGGAGCATTTGTTTCCATCTATTATGGTCAANNNGAGTGTTAGGTTGGATTTCAANNNANNNNNNNNNNNNNNANNTCNANNNTNNTTNNNTNNNTNNNNNNACTTGAGAAAATAGCCCCGGCACTACCACCTTTTATTGTGACAGTGAGTGT…
GmaAffx.5376.1.S1_s_at	BI321591	At2g21660	1e-37	Post-Transcription			GGTTTATGATTATGCTCAGTAATTTTAGTTGTGTTTGAGTTTGAGTATCTTTATGGTTTTGTGTCACCGTG
GmaAffx.90323.1.A1_s_at	CF806048	At2g21660	3e-37	Post-Transcription			GGTTTATGATTATGCTCAGTAATTTTAGTTGTGTTTGAGTTTGAGTATCTTTATGGTTTTGTGTCACCGTG
GmaAffx.91415.1.S1_s_at	CF807140	At2g23930	1e-36	Post-Transcription			GGACTTGATTTCTGTTTGTTGTAAACATTTATATGAGTATTTCCTGGTTTTAACGGTTGTGTATTTGAACAATGTAGCTATGGAGAGTCACATGTAATTGTGGATCTTAAGAAGAGGGTCATGTTGGCCACTCATTTGGGTTCTTCGGGCTAAATTGTTCGGGAAGGAT
GmaAffx.92612.1.S1_s_at	CF808291	At1g11650	5e-62	Post-Transcription			GAACCCTCTGGATCGGGGATCTGCAGTACTGGATGGACGAGAACTATCTCTANACCTGCTTTGCTCANACCGGCGAGGTTNCNTCNGTTAAAGTNATTCGNAACAAGCAAACTAGTCAATCTGAAGGTTATGGGTTTATTGAGTTTAATAGTCGTGCTGGAGCTGAGAGAATTCTNCAAACATATAATGGGGCNATNATGCCNAATGGGGGGCAGAGTTTCAGGTTGAATTGGGCAACTTTT
GmaAffx.92769.1.S1_at	CF808494	At3g19760	1e-124	Post-Transcription			TAATCGTGAGCTTTACATTCATCGAATTGGCCGTTCTGG
GmaAffx.14915.1.S1_at	BE057713	At5g37720	2e-22	Post-Transcription			AAGCTGGAGGTGGTCCTACTATGCCTAATCGTGGTGCTGGTCGGGGACGTCGAGGTGGCCCAAGGAGTGGCAGTGGACGTGGTGGAGGTGGTGGTCGAGGCCGTGGTCGCGGCAGCAGGGGTGGTGGTGGAGGTAGAGGTCGTGGAAGAAAGGATGCTGTTGNNNNNNCAGCGGAGGAANNNGACAAGGAGCTGGAGACCTATCATGCTGAAGCCATGAACATCTCTTGATCTTGGAAGCCGCAGTTTATTTTGTAATATCACTTAAGATTGGCTTCCTTGTACAAAGCTGGTTTCCTTGGCGTTTACTTTGAATCTCTTACTGCTTGGTGCTTTTAAACATGCCATCTTATTTGACCGCATTTAAGTAATTGTTAGAGGCTGAATGATCTACTTGGGG…
GmaAffx.1301.88.S1_s_at	BG041563	At2g03680	3e-21	Post-Transcription			AGTGAGTGAGTGGTTCTCTTGCAGCAACAAGGTTTAGTGACACCAAACAGACTGGAAATGGGTCGTGGGGTCAGTGCTGGTGGTGGACAGAGTTCCTTGGATTATCTCTTTGGCAGTGGGGTACCTGCCAGCAGTGCAAATGGTGCTCGCACTCAAAATGCAAGTGCTCCTTCACCACCGGTTGATAAGCAAAGTCCAGCACCAGCAGCAGCAGCAGCACCTGCACCTGCAGCAGCAGCAGCACCAGCACCTGCACCNGCACCAGCACCAGCACCAGCTGATAAGCAAATTCC
GmaAffx.11747.2.S1_s_at	BI944899	At4g16830	3e-26	Post-Transcription			ATCTTTATTAAATTGGGATCTGACAAGGATAANCGCAAAGATGCTNTNGAGAAGGAGGAGAANTCNAAGAAGTCTGTCAACATCACTGAGTTTCTGAAGCCAGCTGAAGGGGAAAGGTACTACNCTGGTGGGCGNGGTCGGGGACGTGGCCGTGGTTCTAGAGGAGGTTACAGTGGAAATGCATACAGCAATGNTCCAGCTCCATCAATTGAGGATCCNGGGCANTTCCCANCCTTGNGTGGCAAGTGAGGTTTTCCNGAACCCTTCTGACATTTCCCTGTCCTTTTTTNGTCAATTTTGGGTTCTNNGATTTGGACTTNANNGCAGGAAAAAAACTTTGGTANTTGGATTTCCTGAATTAGAANGGTTATTATTTTGACTTCTATGCCTTAAAATGTA…
GmaAffx.34785.5.S1_s_at	BQ453262	At5g61030	5e-06	Post-Transcription			CTATCTACAAGTAAGTTCGAATTGCGGAAGCACCATTCACGATAAATCATG
GmaAffx.4391.1.S1_at	BG654256	At3g19760	0	Post-Transcription			AATACTACAGTACTCAGATTGATGAAATGCCAATGAATGTTGCTGATCTTATATAATTTGTCACGTGGTGTGCTGGATGGAGTGGATTTGTCATATCTTGTGGTAGGGAGTAGTGTTTGAATGTGGTTTCTTGCTATGGAATNCATTCGTGATGCTCTTGTACACTTTTGACTTTTGGTCAAANTAGAATTTTTACCTTAGTGTTGACTGTACCAGAGGTAGTGTTTTTCTTTGCTGATG
Gma.8349.1.S1_at	CD408617	At4g30220	9e-33	Post-Transcription			TAATCACCGCTTCGAGCTCTGTCATTGTCNCAAGTTCCAGGNNNCNNNGNTNNNGNTNTCNNNNAGCATTCTACAATGGCNACTATNCCAGTTAANCCCAAGCCTTTCTTGAACAATTTGACTGGGAAGCCNGTAATTGTGAAACTNAAGTGGGGAATGGAGTACAAGGGCTATCTCGTTTCCGTTGATTCCTANATGAACTTGCAGCTGGCCAACACNGANGAGTACATTGAGGGACANTTTACTGGAAATTTGGGAGAGATTTTAATCAGATGTAACAATGTTCTCTACCTTCGAGGAGTACCGGAGGATGAGGAAATCGAAGATGNTGCNGAAGACTAGANAGTGATANAAGCTGCTAATGGCTATGACATAAANNGAACTCGAATTTNCTACTGT…
Gma.7556.1.S1_at	BG651551	At1g20960	1e-147	Post-Transcription			TGATCAGGAGTATGGTTTCACCGTTGATGTTAATGCTGATGGCGGTGATGAAGATAGCGGCAGAGACTGAAAAGTTTCATGAAGCTTCGAATGCGAAGGACAATATTGTAGCACTGCTGAAAGATTGTATCTTATTCTGGCTAAGGAAGAGATAATTGTAGCAGTAGGAAGTAACACCTGTANCTGGAGGCTCACTATTTGCAGCATTAGGAAGTGGATAGGTTGCTTATTGAAGACGCTGGAGCCCTTTTTTGATTTTGCTTCGGAATGAACAGTAAGTTGTGTCATCGAAGGACGAAAGCAGAGTTTACTATTGTGGATGTTGGAGAACTAACTATAATATCTTAATGCTTGTTGTACGGCAGATTGTATAGATGTTTGTATTGCTTTTCGGTTATC…
Gma.7589.1.S1_at	BU548851	At5g42820	0.0001	Post-Transcription			GCAACAACAACGTTGAGGTTTGGCCCAAAATCTGCTATCAAGAGTGGCAAGTAATCTGGTTTGTGACTTTGTCGTTTGCGCTGAGTTAGATGGATTCAGTTGCCATTGTTTTTATTCTATTTGGAATTGTCAATTTAGTGATAGAACCTTGTAACATCCATAGCATCAATGTTTTAATTTTCTGCTTCAATTGTAATGTTCTGCAAGGGAGGAAGAAAAATGGAAAAAGCGGCGAGTTTAACTTGTTGCGAGGATGAAGCGATAC
Gma.8114.1.S1_at	CD398562	At4g19210	1e-102	Post-Transcription			GAACAAAAGTCTGCCGGGTCTTATTATTACCTTGATGACTGAGTTCATACTTTGGGGCTGTTCTTTCACCAACACAACCTTGCATCTGTTTGAGCTTTTCATGGGATCTCAGATTTGGTTCAGTTCATGCCTTGAAATATAAGATTGCCATTTTTGCCGATGAAAGCATCTTTCTCAATGAATAGAGGAGCCTGCATGCAATTGCAAGCCCTATGTTGGTTGGTGCATTTTGTATATTTACCCTTATATTTAGTGCAGTTACTCATCACCAGGTTTGCTACGACTTGGGTGGGTGAATCTGAATATTACATGAGTTTATATTGGTCATGGTTTTCATTCGATGTCCTAAGTCCAGAGGAACATTCATAATGTCAGACTGAGTTTATCGCCAATTTCAGT…
Gma.8035.1.S1_at	CA802740	At5g42820	1e-06	Post-Transcription			GAGAATTCACATTCTGGTCGTGGTTCTGGTAGAAGAGATTTTGACAGGTCCCATGGCCCCCATGGTAGGAGGCCTAGAAGCCGTAGTCCTCGGTATAGAGGAAAACGAAGTAGAAGTCCAGTGGGCAGAGATAGGAGTCCTCCGATCAGAGAAAGTAGTGCAGAAAGGAGAGCTAAAATAGAGCAATGGAACAGGGAGAAGGAACAAGGGGACACTGGTAACATGAACAATTCGAAAAGCAGTGATGATTATCAAGAACAGAGTGTTGCACAAAATGGTAGTGAATCTGGTAACCATCAGATATAGCAACAACAACGTAATGATTTGGCCCAAAATCTGCTAGTAAGTGTGGCAAGTAATCTGATTTGTGTTGTTTGCACCTGCATTTAGATGGATTCA…
Gma.7140.1.S1_at	BE657222	At5g04430	1e-104	Post-Transcription			GGGTGTTCCATACACATATGTGCTTCNGTCTGTTGCACCACCGGCATACAATGCAGTGAATTACAGACCAAATGGTGCTGCTGGAGGAAAGCTCCAGAACAGCAAGGAGGAGCGGAGTAACTCATTGACCATGGGTGTTGCAGATGAGCATATAGGATTGGTTGTTGGTCGTGGTGGAAGGAATATTATGGAAATTAGTCAGGCTAGTGGGGCAAGGATAAAGATATCAGATAGAGGTGATTACGTATCTGGAACAACCGATAGGAAAGTTACCATAACAGGATCCCAGAGAGCAATACGTACAGCTGAATCTATGATATTGCAGAAGGTTGCTTATGCTACCGAGAGGGGGGTGATGGAGTAGTTTGCTACTGCACTTGTCTGCTGTTAGATGCTTAA…
Gma.7420.1.S1_at	AW350244	At1g17370	1e-180	Post-Transcription			ATGGGAAATGCCCAGTCTCTTCTCTGTGGAAAACAAATTAAGTGCTCTTGGGGGAGCAAGCCCACTCCAGCCGGAACTGCTTCAAATCCCCTTCCCCCACCTGCTGCTGCATCTTTGCCTGGCCTCTCTGCAACTGATCTTTTGGTGTATGAGCGACAGCTAGCAATGAGCAAGATGGGCGGCGTCCATGCTTTGATGCATCCCCAAGGGCAACATCCTCTTAAACAAGCAGCTATTGGAGCTAGCCAGGCAATATATGATGGTGGGTTCCAGAATGTTGCAGCTGCACAGCAAATGATGTACTACCAATAACACACTGCGGTCTCTTGATGCGGTGGTTTAATGTTATCTATATATCCTGCCTTGTGCACATTGATTCGTGTTAAACTCTAGGGAGCC…
Gma.6413.1.S1_at	CD416470	At2g27040	6e-96	Post-Transcription			ATATGCTATGCGCACTTGGCTGCTACTCAGTTGGGGCAGTTCATGAAATTTGAGGACAAATCTGNAANCATCTTCAAGCCATGGTGGATTGAGCGGTGCAGGTGCTGTTCCCGTCCCTCAGTTGCCTCCCTTGCAGGAGAATGTCCGCAACACAATGTTCTTTTGTTGAGGCCTTAATGCTCTGCCCTGTCTCCTCAAGTGGTGAAAATGCTGTACATAAAACTATGTTTCTAATCTTGCAAGTTATGCGGACGAAGTTTATATTGTGGTAGACTTGGTCTTCTTAGCCATATTTAGTCTTTCTAGCACAAGCCTTTTCAAATGTTCGGGGACCTTACCTTACTTTTTGTAGCAAGACTCTCTTTAGCGCAACGTCTTTTTGTAGCAAGGCTTGATCTT…
Gma.6512.1.S1_at	AW733220	At4g16830	4e-52	Post-Transcription			GGAAGCATACTATAACCCAGGACGTGGTAGGGGCCGTGGCCGTGGTTCACGAGGNNNNNNCGGAGGCGGNNNNNNTTACCNTGGAAGTNCCACCAACAATGCACCTGCTCCATCCATTGAAGATCCCGGGCATTTCCCAACCTTGAGTGCCAAGTGAGGCCTTNCCAGAACCCTTTTGACATATCNCTGTCCTATTTTCAATTTTGGGTTCTCTTATTTGAACTTAANCAGGAAANGAACTATGGTAATTGGATTTCCTGGATTAGAAGGTTCATTTAATTTTATGCCTTAAAAGTGTAAATTTAGGTTGTTNNNCTTCATACGGTCATGTATCCCTTGAAGCCTGTTCCTCCTTGTGCTTTATTTTTACCGCGTTTGATATTTTGGGGGAATATGGTC…
Gma.5747.2.S1_a_at	BI498317	At1g48410	1e-126	Post-Transcription			AATCTTTGCTACACATATGCTCGGTGCACCCGATCTGTTTCAATTGTGCCTCCTGCATACTATGCTCACCTTGCTGCATTCCGTGCAAGGTTTTACATGGAACCCGAGACTTCGGATAGTGGCTCTATGACAAGTGGTGCTGTTGCAGGCCGTGGGATGGGTGGCGGCGGTGGTGGTGGTGTAGGGCGTAGCACCCGGGCACCTGGTGCTAATGCTGCTGTGAGACCATTGCCTGC
Gma.5747.2.S1_at	BI498317	At1g48410	1e-126	Post-Transcription			ACCCGGGCACCTGGTGCTAATGCTGCTGTGAGACCATTGCCTGCACTCAAAGAGAACGTTAAGAGAGTTATGTTTTATTGTTAAGAAGATATGATATGCATGCCAAAGATTACTTTTAGCAACCTTGTTTTGTGGAGGAGTGCTTTTTCCCTTGCTGCTTTCAAACTATCTCCAGTGGTGTGGTCTGTGTCATTAGTATTGAGTTTTTTGAAACTATTTAAGGTGTGTGGTGTGTTGAATAAGGTTGTCCAGTGTGGAGTGTTTTATCTTTGCTATGAGGGTCTGATATTTGATGCAAACT
Gma.5864.1.S1_at	BF067737	At4g13850	1e-38	Post-Transcription			AATTACATCCGCTGCATGTCTTCAAGCAAGCTTTTCATTGGAGGCCTTTCATATGGAGTTGATGACCAGTCTCTTAAGGATGCATTTTCTGGCTTTGGAGATGTGGTTGATGCAAAAGTTATAACTGATAGAGACAGTGGAAGATCAAGGGGATTTGGATTTGTCAACTTCTCCAATGATGAGTCTGCAAGTTCGGCACTCTCTGCAATGGACGGGAAGGATCTAAATGGGCGAAGCATTCGGGTATCCTATGCAAATGATAAACCATCTGCACCTCGACCTGGTGGCGGTGGCGGTTATCGTGGCGGGGATTATGATGGTGATTTTGCTTCTCGTAGTGGTGGTTGGTGATCAAATTTTTGTTTGTTGCGCCTTCTGCTTAGTTGAGATTTTATGTTT…
Gma.5892.1.S1_at	CA852600	At5g64200	9e-47	Post-Transcription			GGACGCTATGATGATGAGCGTAATAGTAGAAGCCGGAGCAGATCAGTTGATAGCNGCTCCCCTGCACGACGCAGTCCTAGTCCTCGAAGGAGTCCCTCCCCTCAGAGGAGCACTTCCCCTCAAAGGAGTNCTTCCCCTAGGAAGAGTCCACGGGGTGAAAGTCCTGCAAATCGTAGCCGNGANGNNCGTTNCNCNNNNCCCTCGCAGTGTCTCACCACGCGGTCGCCCTGATGCTTCNCGAAGNCCTTCCCCTCGAAATTCAAANGGGGATGAATAAGCTATGTTNNNCATGAAAAATTCTGGAGACGNCGGACTATTGCACCTGTAGCTGTTTTGC
Gma.5905.3.S1_a_at	BM567825	At1g20580	8e-50	Post-Transcription			GAGAGCATCACCTACACTGCCAAGGATGGCAAAACATCGCAACTTGAGCATGTNTTTATTCGAGGNAGCAAAGTCAGGTTTATGGTCATCCCNGACATGCTGAAGAATGCNCCTATGTTTAAGCGTTTGGATGCAAGAATCAAGGGNAAGGGTGCATCACTTGGTGTTGGTAGGGGCAGAGCAGTTGCAATGCGAGCAAAGGCTCAAGCTGCTGGGCGTGGAGCTGCNCCTGGAAGGGGTGTACCACCAGTGCGGAGGTGATCACCAT
Gma.5801.1.S1_at	BE555008	At2g21060	0.0001	Post-Transcription			TGAAACCATCGACTAAATACTCTGTTTCCTGTCGTGAACGTAATATGCTCTGCCTTACCT
Gma.5451.1.S1_at	BE822328	At3g19130	1e-130	Post-Transcription			GTGTGGATTTGTTCAATTTGCTGACAGAAAGAATGCTGAGGAAGCAATTCAGGGATTGAATGGGACAGTAATTGGGAAGCAGACAGTGCGTCTTTCTTGGGGTCGCAGTCCAGGAAATAAGCATTGGAGATCTGATTCCAATGGAGGCCATTATGGTGGTCATCAGGGTTATGGTGGCCATGGATTTGCTGTGAGACAGAATCAGGATATAGCCATGCAACCTGCTGCTGCAATTCAAGGTGCTTCCTAACGGGGCTTATTAGCAGAACTGTGTGTTGAAGTAGGATGGATTTTATTGCTCTCCCCTAAACTGTAGTATTATTTTTAAATTTGTAGCTGGGTTAAGGTATGCCAGGTTCTTAAGATTGTATTAAAATGTCTGAAATTTTGGATTGAACC…
Gma.5650.2.S1_a_at	BG238507	At2g21660	1e-36	Post-Transcription			GGATGTTGAATACCGATGCTTTGTTGGTGGGCTCGCTTGGGCCACTGACAACTACGATCTGGAGAAAGCCTTCTCTCAGTACGGTGACGTCGTTGAATCGAAGATTATCAACGATCGTGAGACTGGAAGATCCAGGGGATTTGGATTTGTTACCTTCGCCTCCGAGGATTCAATGAGGGATGCGATCGAAGGGATGAACGGTCAGAACCTTGATGGACGCAACATCACTGTGAACGAAGCTCAGTCCCGCGGAAGCCGCGGTGGAGGCGGTGGCGGTTACGGAAGTGGCGGTGGATACAACCGCAGTGGTGGTGCTGGAGGATACGGTGGCCGTCGGGAAGGTGCATATAACCGTAACGGTGGTGGTTATGGCGGTGACAGAGACCATCGTTACGGACC…
Gma.3704.1.S1_a_at	AW348461	At1g51510	2e-44	Post-Transcription			GGAGAGATTAAGAACCTGCATTTGAATCTTGATCGCCGCACTGGTTTTGTCANAAGGTTATGCNGTTGATTGAATATGAGCGTGCTGAGGAAGCTCGAAATGCAATANGAGAATTTGAATGGATCTGAGCTTCTTACCCAAACCATTTATGTTGACTGGGCCTTCAGCAGTGGACCTATTAACGAGTCAGTCAGAAGAAAGAATGCTAGACCACCTCGTGAACGGCGTTCCAGGAGCCCCCGGAGGAGATATTGACATGTGTAGTGAGTAAATGTTTGTGTTGATGTGTGTGAACCCGTAAGTGAGCGGCTTGGTTTCTATTGCTATAGCTGTGGAGGATTTTTCTGATACTTGTGCTTCCGTCAGGCAAAATACATATTTGATGCTGACAATTCTCAT…
Gma.2711.1.S1_a_at	BU545471	At5g11200	6e-21	Post-Transcription			TCTACTGCTGACTCTGAGGTTCTTAATCAGGTGCAATCTAGGTTTGAGGTTGACATAAAGGAGCTTCCTGAACAAATTGACACTTCGACATATATGCCAAACTGATGACGTTTTGGAACTATTAGGAGGCAGATCT
Gma.2609.1.S1_s_at	CD408095	At5g11170	3e-82	Post-Transcription			TGACATGCCTGATTCCGCAGACACATACTTGCACAGGGTTGGTCGAGCTGGAAGATTTGGCACCAAAGGCCTTGCAATCACATTTGTTTCTTGTTCTACTGATGTCGATGTTCTCAACAATGTTCAGTCTAGGTTTGAGGTGGATATAAAGCAGCTTCCTGAGCAGATTGATACCTCTACCTATATGCCATCGTAGATTTTTTTGGGAGCAATGTTAGATGCTTGGTGGCATGAGTAATAGTGACGCATGGTAATTTGAACGGTGCAGCTGGATGATTAACCGGTGCTGATAGACACCAGAGTCTGTCTACAGACTGCCATTTTACCATTGGATATTTATCGGTATTATTAGATAGCAGCAGTGTAATGGCTTATGCATTTATGTGGTTTCACTTACTG…
Gma.2609.2.A1_at	AW311028	At5g11170	4e-09	Post-Transcription			GGAACAATGTTAAGTGCTTGGTGGCATGAGTAATCGTGACGCAGAACGGTGCAGCTGATGATTAACCGTGCTGATAGATACCAGAGTCTGTTTACAGACTAGGCCATTTTACCATTGGATATTTATCGGTATTAGATGTAGCAGCAGTGTAATGGCTTATGTATTTATGGGTTTTCACTTACTGTATTTTGTGTGGCACCTACGCTGTTTTCATGAACGGTCATGTTTTGAGTTGGTCT
Gma.2497.1.S1_at	CD396374	At3g49430	3e-42	Post-Transcription			GCCACAGCAGAAGTCCCAGCAGGAGCAGAAGTCCAAAAAGAGTTAGAANNANATNTTTGGAGCGTTCTGTGTCTAGGTCTCGATCTAGATCGCGATCAGTATCACCAATCAAATCTTCTAGGCCAAGATCACGTTCACGATCTGGATCTCCTCGTCAGGTGCTGTCAGGTAGTGGTTGAGTTTCTGAAAAAGCCTGTGGTTCTCTGGTGATATTCTCCCATTCTGGTGGGCAGTATCGGAATTATATTTGAGTTGGACTAAATTGTTTTAGGGAAAATTATTGTTGTACCTAGGCTGTTTCTTGGTAAATTGTTACCAGTTTGGTGATTGTGTTGTTTCTTTTAAAACTAAAATGTTGGACATTAGCCTAGCGCTTTGTACCTTTTAA
Gma.18058.1.S1_at	CD391958	At4g25630	1e-104	Post-Transcription			GAATGGTTGATGTCATATTTTCTGANGTTGCTCANCCTGATCAGGCTAGGATTTTGGGGCTGAATGCTTCATATTATCTNAAAACAGGNGGTCATTTTGTTATTTCAATCAAGGCTAACTGCATAGACTCCACAGTCCCTGCTGAGGCAGTGTTTGAAAGCGAAGTGAACAAGTTNAAGGCNGATCAATTCAAACCATTCGAGCAAGTCACCCTTGAACCATTTGAGAGGGACCATGCCTGTGTGGTTGGTGGATACAGAATGCCCAAGAAGAAAAAAGATGCTGCTGAGTAGATTGNTTTCCAGTAGCCNGTAGGCGTGTACCAATGTNATTTCATGAGATTTNGTGTTAATTTTGTTTCGAAACCTTGGTTATAAAACAGTTCTGTTTTGAATTTTG…
Gma.18058.2.A1_at	AW832198	At4g25630	1e-26	Post-Transcription			ATGAACAAGTTAAAGGCTGATCAATTCAAACCNNNNNNGCAAGTCNCCCTTGAACCNTTTGAGAGGGACCATGCGTGCGTTGTTGGCGGATNCAGAATGCCCAAGAAGAAAAAAGATGCTGCTGAGTAGATTGCTTTCCAGGCGTGTNACAATGTTTTCATTTCATGAGATTTGTGTTAAATTTTGTTTTGAAACTTTAGTTATCNAACGTAGTTCTGTTTTGATAGTTTGATCGTTTGAATGCCCTAGAGGAAAAAAGATACTTNTGAGTATATTACTTTCCAATAGCCTGTAGGTGTTTACCAATATCATTTCATGA
Gma.1793.1.S1_x_at	AW349902	At3g56860	6e-45	Post-Transcription			TGGAACGAGTGCTGCGGTGAACCCTGGTGTGCCTGCTGCAGGGTCTGCGGTGCAGGGTGGTGGTTATAGTGCTCAGCCGAATATAAGTCCCGGTGTTGTTGGAGGATATGGGAATCAGGTGGGGTTACAGGCTGCGTATCCGAATCAGAATCAGCAGATAGGGCAGGGTGGATCTGGAAGAGGGCAGTATGGTGGTGGAGCTGCGCCCTACATGGGGCACTAGATTCCACATAAGTGCATCAGTCTTTTATTACTGGCCTGGCGTTTCTTCTGAGTTCTGAAGTTTAAGGAGCTGATGCAATTGGCGTGTTTATAATGAAATGCTACTTACTGATCAGAATATTTTAATTACCAAATGGAGTTCTGTTTTCGCCACCTGCTTTTTCTTATTTTCTTCCC…
Gma.1856.1.S1_at	BQ628889	At4g14342	3e-44	Post-Transcription			AGCGAATCACACACACTCTGAACAACGCCCACCATGCAGGCCAGTGATAGGTTTAACATCAATTCCCAGCTTGAGCATCTCCAAGCCAAATATGTTGGAACTGGCCATGCCGATTTGAACAGATTTGAGTGGGCAGTGAACATTCAACGAGATAGCTATGCATCATATATTGGACACTACCCTTTACTGGGATTCTTTGCTATTGCTGAAAATGAATCTATTGGAAGAGAACGCTACAGCTTTATGCAGAAAATGCTCCTGCCTTGTGGTTTGCCTCCCGAAAGAGAAGAAGATTAAGGATTACATCTGGATTACAAATGGATCACACAACACTGTTAATATAGCCTCCGACAGTTTGTTGTACCGTGTTATCTTATCAAGGAAACAGATGGTTGTGTG…
Gma.2060.1.S1_at	CD397075	At2g24590	3e-36	Post-Transcription			TGTGGTGAACCTGGTCATTTTGCTCGTGAATGNCGCATGCGTGGTGGTTCAGGAAGACGCCGTAGCCGTAGTCCACCCAGATTCCGTAGGAGCCCAAGTTATGGGCGAAGNNNNNNNNNTCCTCGTGGGCGGTCCCCTAGGCGCCGTAGTTTGTCACCTCGTGGACGTAGCTACAGCAGGTCACCTCCTTATCGTGGGCGTGAGGAGGTCCCATATGCTAATGGAAATGGCCTTAGGGAACGACGCAGAAGCAGAAGTTGATTTTGAGACTTGGTATCTGTGATTGTTAAGAGAATAGTGAGATTTTGTTAATCTATAGTGGTGCTTAGACTGAAGTATGAGTCTATTTTGTTGGGCAAGGCCCTGAGTTTCTACTCTTGGATTGTATTCGTTAGTTTC…
Gma.1437.1.S1_at	CD392202	At1g49760	2e-68	Post-Transcription			CAGCCAATGCCCATTCAAGCTTTGGCNACNGCNCTNGCAAATGCTCCNCCNGAACAGCAGAGGACTATGCTCGGTGAAGCTTTATACCCNCTTGTGGATCAGCTGGAACANGATNCTGCNGCAAAGGTTACNGGCATGCTTCTGGAGATGGACCAGCCTGAAGTTTTACATCTGATTGAGTCACCAGATGCTCTGAAGGCAAAAGTTGCTGAAGCCATGGATGTGTTNAGAAATGTTGCTCAACAGCAAACNAACCCAGCTGATCAACTAGCNTCACTCTCTCTCAATGACAATCTTGTGTCTTAGATTCCNTTAGTCNTTTGACNNGAATCTGNNNNCCAGTTATTNCTATNCCGTANGCTNCCCNCCAGTTTATTTGCAGGTGTCTTAGATGTTTTG…
Gma.12187.1.A1_s_at	AW734314	At1g66260	8e-12	Post-Transcription			GGGACGTCGAGGTGGCCCAAGGAGTGGCAGTGGACGTGGTGGAGCTGGAGGTCGAGGTCGTGGTCGCGGCAGGGGTGGAGCTGGAGGTAGAGGTCGTGGGAGAAAGGACGCTGTTGAGAAGTCAGCGGAGGAACTTGACAAGGAGCTGGAGACCTATCATGCTGAGGCCATGAACATCTCTTGATCTCGGAAGCCNCAGTTTATTTTGTAATATTACTTAAGATTGGCTTCCTTGTACNAAAGCTCGTTTCCTTGGCGTTTACTTTGAATCTCTTACTGCTTGGTGCTTTTAAACATGCCATC
Gma.12513.1.S1_at	CD398913	At1g76860	1e-31	Post-Transcription			GTGGCAAACTTCACGCTTATGATCAGCATCTTAATATGATTCTTGGNGATGTTGAAGAAATNNTTACTACAGTGGAAATCGATGATGAGACATACGAAGAAATTGTGAGGACTACAAAGCGGACAGTTCCTTTCCTGTTTGTCAGGGGAGATGGGGTGATATTGGTTTCCCCGCCATTGAGGACNGCATGACTGGACTGATGAACTATGTGATCATTTNAATAACAAGTGTCACTGTTNATGAAATTGTATAACTTNAAGTAGTGATCTCATTTCATATGATTAGGTTAGTTACTCAATTGGCCTNGTGTGCTAGAGATTTCTGTTANACAGTCANNTTTTCAATTATCTTTGTANCATGAGAGAATCATGGNATGCACATAAACNNNGATTNNNGCTG…
Gma.12599.1.S1_at	BM885192	At2g39780	2e-95	Post-Transcription			TAAGGACTTCCAGCCACGAGATTGTGCTCTTGGATCTGACATTAAAATCAACATGGTTACTTCTAAAAAATCTTGTCCCAAATATGTTAGCTTGCCGGAGCCGGTATCAGTGAGTAAGACAGGCACAATGGACTTCAAAGTCGGGGCTATGATGATGTAGCTCTTTAAGGTTATGGTACTGTACTTCTATTTGTAAATTTCTGTACCTTGCGAATGAACAAAGCCGCATGAATAAATTTGCTAGGATGTTGTACCATTTATCAATTTGGAGATAAATGAATAGAGTGACGAGCTGGACATCTGGATTGGGATCTAGACCTGCTAATGTTTAGNCAGAAAAAATGAAGTGATGGTCGAAAGTATTATTTGGGAGTTGGGAGCTGTCTCAAGTCTGGTGCC…
Gma.15848.1.S1_at	AW348925	At4g02840	8e-40	Post-Transcription			ACCCAGTTACTTTGGATCATCTCAGTGTGAGAGGCAACAACATTCGATATTATATCCTTCCTGACAGCTTGAATCTTGAGACTTTACTGGTTGAAGAGGCTCCTAAGATCAAGCCTAAGAAGCCAACTGCTGGGAAGCCTTTGGGNAGAGGGCGGGGGCGAGGACGTGGNCGNGGCCGTGGTCGTGGNCGTTAAGTTGCACATCACAAAATTTGTGGCATTTGCTTGTACCTTTATTGTAGGGAATTTTTCGGAGAGAAGTTTTAAAGACGTTGCAGGAGTGCTGTTGTTAGTTAGTCA
Gma.15407.3.A1_s_at	CD393885	At5g52040	1e-34	Post-Transcription			GCCGGAAGGGCCAACTGATTGTAGTACTGTTTCATGGCTGGACTAAATTTCATTTCAGCAATTTGTTTTAGTGTAGTAGTGATAAAGCTCTGAAACTTGTGTTGTTGTGACAACTTAGTCCTTTTTTGTTTAGTTAGTTTCATATTTATTTGTCAGCTTAGTATTGTAGAATCTTTGTTTACAGTAAAAAGATGGTACTATATCTTTTGATCAATATTGGCGAACTTGGCA
Gma.15462.1.S1_a_at	AW350341	At2g37220	1e-72	Post-Transcription			GTCTTGGAAGCTAGGGTAATCTATGACAGGGAAAGTGGACGATCTAGAGGCTTTGGATTCGTGACTTTCGGTAGCCCTGATGAGGTCAAAAGTGCAATTCAGTCCTTAGATGGTGTGGACTTGAATGGCAGAGCTATACGAGTCTCATTAGCAGATTCCAAGCCCAAGCGGTTCTGAAGCTTTTCATCTATACCCGAGAGAGGATTTCGGTAGTTGGGACTTGGGAGTTATACAGCTGCAAGATGTCATTGGCAATCAGTTTGGACAAGAAATACACTTACATGCATTGAGACTA
Gma.16632.1.S1_a_at	BM886453	At1g49760	0	Post-Transcription			CTGCGTGATGCATCAATCTCCCAGCNAAATTCCTGTTGGGGCTTTAGCAACAGCTCTGGCTAATGCTTCTCCAGAGCAGCAGAGGACGATGCTGGGTGAGAATCTCTACCCCCTTGTGGAACAGTTAGAGCCTGACAATGCTGCCAAAGTGACAGGCATGCTTCTTGAGATGGACCAGACTGAAGTTCTGCATTTG
Gma.16383.1.S1_at	AW317322	At4g36960	2e-38	Post-Transcription			ACAGGTCATAGAGGTTTTGGATTTGTTACTTTTGCTGAAGATGGTGNAGCAGATCGCGTCTCTCGAAGGTCTCATGAGATTTGTGGACATCNGGTGGCAATAGATTCGGCTACTCCTGTTGATGATGCAGGGCCCAGTGGGAATTTTATGATGAATAGTATGGAATCTTTTGGGGGATATGGTGGTCCTGTGCGATCTTATGGGAGGATGTATGGTAGCTTNGACTTTGATGATTGGGGTTATGGAATTGGGAGACCATCAAGAGCAGNNNATTGGAGGTATAGACCATACTAGTAGGACACAACTTATNGGTGCCNGCGAACTGTGGTGNNGTTNTTTAACTATGATTTTTAAAGNTNTGTAAGAACTATNNNNNGGATTTTATTTTATCCATCGTAA…
Gma.16817.1.S1_s_at	AF169205.1	At2g21660	6e-36	Post-Transcription			TGAAAGATGCGATCGGAGCGATGAATGGACAGAACTTGGACGGCCGTAATATCACTGTCAATGAAGCTCAGTCCCGCGGTGGCGGCGGCGGCGGCGGCGGAGGAGGAGGAGGATACAATCGTGGTGGCGGTGGATATGGTGGTCGTAGTGGCGGTGGCGGTGGCGGTGGTGGATACCGTAGCCGTGACGGTGGTTATG
Gma.10924.1.S1_a_at	BE820846	At3g62840	2e-39	Post-Transcription			GTGTTAAAAATAATACTCAGGTACTGATAAATTGTCGGAACAACAAAAAGCTTCTGGGTCGTGTAAGGGCTTTTGACAGGCACTGCAACATGGTTCTTGAAAATGTCAGGGAGATGTGGACTGAGGTGCCAAAGACTGGTAAAGGAAAGAAAAAGNCCCAGCCAGTCAACAAGGATAGATTCATCAGCA
Gma.10924.1.S1_at	BE820846	At3g62840	2e-39	Post-Transcription			GAGGAGTTCAACACCGGACCACTATCTGTACTCATGATGAGTGTTAAAAATAATACTCAGGTACTGATAAATTGTCGGAACAACAAAAAGCTTCTGGGTCGTGTAAGGGCTTTTGACAGGCACTGCAACATGGTTCTTGAAAATGTCAGGGAGATGTGGACTGAGGTGCCAAAGACTGGTAAAGGAAAGAAAAAGNCCCAGCCAGTCAACAAGGATAGATTCATCAGCAAAATGTTTCTNCGTGGAGANTCTGTCATCATTGTTCTTAGNAANCCCAAATGAGATTCTGTCATCAACTTGTANNAGTAAATGGCTCTGTAGTATTTGCCTTTTCGTTATATCTTGAATTCTTGANAAACGAATATGTAGACATTCTGNCCTTCAAAANNNATTATGTAA…
Gma.1034.2.S1_at	CD390455	At1g02840	5e-76	Post-Transcription			GCAGTCGTAGCCGTAGCCATAGTTACAGTCGGGACCGGAGCCAAAGCAAATCTCCAAAAGGAAAGTCTTCACAGCGTTCACCTGCTAAATCTCCAAAAGGAAAGTCTTCACAGCGTTCACCTGCTAAATCTCCATCAAGATCTCCCTCTCGTTCTCGCTCAAGGTCAAGGTCCCGTTCGTTATCAGGATCACGGTCCAGGTCCAGGTCTCCATTGCCTCCGCGTAATAAAAGCCCCAAAAAACGCAGTGCTAGCAGGAGTCCAAGTAGGAGCAGGAGCAGGAGCAAGAGTTTGTCTCGGTAAGCTCTGATTGTTGCAATTGAAGAAGTTGTGGATGATGGTGAGTGCTACCAAGTTTTTCTAGTAAAATTGACATTAGCCAAAAAAGGCATTTGGGTTT…
Gma.11121.1.S1_s_at	CD395997	At1g11650	8e-76	Post-Transcription			TGGTTACCAAGCTCCTCAACAACAGCAGCAAATAGGATATAGTTGAGAAGAGTCTGTTCCTTTTCTTCTGTAATCTTTTATGATACTTATCGACTTGCGTATCTCTTATCTCGTGGAAAACCCACTCTGCTACTTTTTTCCTTTGTTTGCTTAGTAACAT
Gma.11121.2.S1_at	BM519870	At1g11650	1e-118	Post-Transcription			GACCCTGTTGGGTGGTCAAAATGTTCGTCTTTCATGGGGCCGCAGTCCTTCAAACAAACAGGCTCAGGCAGATCCAAACCAGTGGAATGGTGGTGCTGGTTCTGGTGGTGGATACTATGGGTATGCTGCACAAGGTTATGAAAATTATGGGTATGCTCCTGCTGCTGGACAGGATCCCAACATGTATGGCAGTTATCCGGGGTATCCTGGTTACCAACCACCTCAGCAACAGNCAACAAATAGGATATAGTTGAGAAGAGAATGTTCCTTTTCTTCTGTAATCTTTTGTGATACTTATCGAGTTGCGTGTCTCTTCTCGTCTCGTGGAAAA
Gma.11121.2.S1_x_at	BM519870	At1g11650	1e-118	Post-Transcription			ATGTGGGTTTGTCCAATTCGCAGACAGGAGCTGTGCNGAAGAGGCACTTCGGGTGTTGAATGGGACCCTGTTGGGTGGTCAAAATGTTCGTCTTTCATGGGGCCGCAGTCCTTCAAACAAACAGGCTCAGGCAGATCCAAACCAGTGGAATGGTGGTGCTGGTTCTGGTGGTGGATACTATGGGTATGCTGCACAAGGTTATGAAAATTATGGGTATGCTCCTGCTGCTGGACAGGATCCCAACATGTATGGCAGTTATCCGGGGTATCCTGGTTACCAACCACCTCAGCAACAGNCAACAAATAGGATATAGTTGAGAAGAGAATGTTCCTTTTCTTCTGTAATCTTTTGTGATACTTATCGAGTTGCGTGTCTCTTCTCGTCTCGTGGAAAACCGAC…
Gma.11337.1.S1_at	CD402585	At1g80070	1e-160	Post-Transcription			GACTTGCAGCTTTACTCCTGGTTCTTGTTCTTTAACTGCATATAAGCTCACTCCATCTGGTTANGAATGGGGGCGTGTNAATAAGGATACGGGAAGCAATCCACATGGTTACCTTCCCACCCATTATGAGAAGGTTCAGATGCTCCTTAGTGATCGCTTCCTTGGTTTCTACATGGTTCCTGATAATGGTCCATGGAATTACAACTTCATGGGGGTGAGACACGCATCAGGGATGAAATATGGAGTGAAGCTNGGGACTCCTAGGGAATATTACCACGAGGACCATAGACCAACCCATTTCTTAGAGTTCAGCAATATGGAGGAAGTGGAGANANCTGCTGAGGGAGATCGAGAGGATACATTCTCTTGAGAGATNNNNNNNNTTTTGTTTGAGATATA…
Gma.11316.1.S1_a_at	BQ298057	At4g35750	5e-82	Protein Destination & Storage	Autophagy		AACGCTGGGCTGTATGGAAAGCTGAGGTACGTGAGCAGGGTTGATTATCTGTGGGAGAATGTGAGGAGGAACGAAGTGGAGATTCCGGAGTTTGTGTTTGATCACGACGAGGATTTGGATTACCGTCCGATGATGGATTACGGATTGGAGAGCGATCACGCTAGAGTGTACGGTGGTGCTCCAACTATGGATTCACCCGTCACCACCTACTCCATGAGGTGCATCTCATAGGATTCCCGATTCCTCTCCAGGATATCTGCGCCTCTTGTTTTTTGTGCGTTAGGTAGATTGGGCCTCCCTGTTAGTTATATGGGCCCATAGCTATGTGGTTGTTGATATTGTGCAGAAAGAAAAAGTAGTAAAACAAGCTTTTTTTAGGTCTTGCTAATGTGTTAATAC…
Gma.11246.1.S1_at	BU550454	At4g38600	4e-60	Protein Destination & Storage			GAATGGACCTTCAGAATCAGCAGATGATGACTTGCCTAGTGTGATGACATGTGCTAATTACCTGAAACTTCCTCCTTACTCTACCAAGGAAATTATGTACAAGAAGNTNCTCTATGCAATCANNGAGGGCCNGGGATCCTTTGATTTATCATGAGTTTCTGAAACTAACCAACCTTACCCTGCATGTTAATAGATGGNTCAGGGTTTATNGACTTTATTCTCGAGGNTCAGTTNTTTNTTTNNNTTGGTTGGATNTGCTTTGCTNCNNNNNNCTCGCTTCTCGAATAATAGTGTCTCATTTTCCGTGCTCAATGCAAATTGCAAGGTTGTGGAATTATTCAGTTGAATCGGGTCGCCACATTTTCAAAGTGTAGGGGAATTTACGGAGCTCTTATTTGA…
Gma.11256.1.S1_at	CD401123	At1g56450	2e-57	Protein Destination & Storage			TGTGGAATGCACTTGTACTTGGTGGGGTGAAAAANGGGCAGAAGTACNCTTGGCATGGTTAACATGATTGGCATTAATTTTGAGGACAACCATGTAGCAACCGGGCTTGGAAATCATCTNGCTAGGCCAATTCTCCGTGANGAGTGGCATGAAAACTTGACCTTTGAAGAGGGCGTCAANTTACTGGAAAAATGCATGCGTGTGCTTTTATACCGTGATAGGTCTGCTGTCAACAAAATNCAGATATCTAAAATTACAGATGAAGGTGCCACTGTTTTCCCACCATTCTCNTTGAAAACGTACTGGGAGTTCTCTGCCTTCAAGAATCCAACTGTGGGCGCTGAAG
Gma.11272.1.S1_at	CD391928	At5g59720	3e-19	Protein Destination & Storage			GATTCGGCTCATCGGTGGTTAACACACGTGTGGACTGGAGGGAGACTCCCAGAGCCCACGTGTGGAAGGTCGTGCTTCCTGGCTTCACAAACGAGGACGTGCTGGTTGAGCTACAAGACCAGAGGGTGCTCCAGGTCAGCGTGGAGAGTGGTAACTTCCTGACGAGGTTTAAGATCCCCGACAACGGTAACCTCGAACAACTCAAAACCAACATGCGTCACGGGATTCTCCTTGTCACTGTTCCCAAGTTTCATCAACCCACTTCTAATAGGAATGTCAGGGTCGTTGAGATTGAAGGCACCGACTGAACCCAGTTAGCAAACTCTGTCTCTTCCAAGTTGTTCACTCTAAACAAAACAAAAGACGCTGTCGTGTCTATGTATGTGTCCGATGGAACTG…
Gma.11169.1.S1_x_at	BI702093	At3g52590	2e-66	Protein Destination & Storage			CCGCAAATGCTATGCTCGTCTGCACCCTAGGGCTGTGAACTGCCGTAAGAAGAAGTGCGGTCATAGTAACCAGTTGAGGCCTAAGAAGAAGATCAAGTAAATTCTGGGTGGGATATTGTTGGTCTCTACTTTCGTTTTGTTTGTCTTAGAACAGTGACTTGTTTGGTATTTATCGTTTCTGGTT
Gma.11169.3.S1_s_at	BI943988	At3g52590	2e-39	Protein Destination & Storage			GAGCCTTCCCTCATGGCTTTGGCTCGCAAATACAACCAGGACAAGATGATTTGCCGC
Gma.11201.1.S1_s_at	AW597749	At4g36760	0	Protein Destination & Storage			AATTGGCTGAACTCCTATCACGCCACATGTAGGAATATTCTGGCGCCATATTTGGATGAAGTTGAAAATGCATGGCTGAAGAAAGCCACTGAACCTGTAGGTGCATGAGCTGTGTTTGGAGTTGAAAAGTTAAATAACTTAAAGATGGTTCAGCGTAATTTTAGTGTCTTCCGTATCCATAATACTGTAATCTAGATTTTAGATATCATTGGGAATGGTTATTCCTTCAAATTACTATGCACAGCATATATAATATATCAATATTCTGCTGCATCANANNNGAGGGCGTGTACAACGTTAAATTGTCTATCCGCACGGCATCACTGCATGCATCAGCTCTTTTACTTTTCCCTAAT
Gma.11201.3.S1_a_at	BG239638	At4g36760	2e-56	Protein Destination & Storage			CAGGCTCGAAATGTACCATTGCAATCTTCCATGACTGTTACAGATGAACCTGGTTACTATGAGGATGGAGAGTTTGGGATAAGATTGGAGAATGTGCTTATTGTCAAAGAGGCTGGTACAAATTTCAATTTTGGTGATAGAGGTTACTTATCTTTTGAACACATTACCTGGGCACCATATCAGAC
Gma.11179.1.S1_s_at	AW350100	At5g02500	0	Protein Destination & Storage			TTGTTGGATGGGATTCAAACTATTTTTCCCTTCTGATATGAACGTTGCTTTAAGCATTATGTTATTTGCGTTATTTTCATTATTAGATGGTATACTCAATTGTTATGCACTTTACCT
Gma.11179.1.S1_x_at	AW350100	At5g02500	0	Protein Destination & Storage			TGCTGGTGCAGCAGAGGATGAGTATGCTGCTCCTCCTTCTGGTGGAAGTGGTGCTGGCCCCAAGATTGAGGAAGTGGACTAAATGTAGTTGCTTTCCTCCAGATACCTGTTTTAAAAACTTATTTTACTTTATGCTTTTTTAATTGGATTTTAATCGCATGATTTTTGTTGGATGGGATTCAAACTATTTTTCCCTTCTGATATGAACGTTGCTTTAAGCATTATGTTATTTGCGTTATTTTCATTATTAGATGGTATACTCAATTGTTATGCACTTT
Gma.11179.2.S1_s_at	BI945894	At1g56410	6e-87	Protein Destination & Storage			TCGGAATCGATCTCGGAACCACCTACTCTTGCGTCGGTGTGTGGCAACATGACCGCGTTGAAATCATCGCCAACGACCAAGGGAACAGAACCACGCCGTCTTACGTCGGATTCACTGACACCGAGCGTCTCATCGGTGATGCGGCCAAGAATCAAGTCGCCATGAACCCCATCAACACCGTCTTCGATGCCAAGAGGTTGATTGGTCGTAGATTCAGTGATTCCTCTGTTCAGAGTGATATCAAATTGTGGCCTTTNCAAGGTCATTCCTGGTGCTGCTGACAAGCCAATGATCGTGGTTAACTACAAGGGTGAAGAGAAGCAATTTGCCGCAGAAGAAATCTCTTCCATGGTGCTCATCAAGATGCGTGAGATTGCTGAGGCTTACCTNGGCTCCACN…
Gma.11179.3.S1_at	AW423548	At3g12580	0	Protein Destination & Storage			GAGAAACTTGATCCTACTGACAAGAAGAAGATTGAGGACGCAATTGAGCAAGCTATCCAGTGGCTAGACAGCAACCAGCTCGCAGAAGCAGATGAATTTGAGGACAAAATGAAGGAATTGGAAAGCATCTGCAATCCTATCATTGCCAAGATGTACCAAGGTGGTGCTGGTCCTGACATGGGTGGTGCTGGTGCTGGGGCAGCCGAGGATGATTATGCTGCTCCTTCTGGTGGAAGTGGTGCTGGCCCCAAGATTGAGGAAGTGGACTAAATGTGTAGTTGCTTTCATCCATTTATCTGTTTAAAACTTA
Gma.11179.3.S1_x_at	AW423548	At3g12580	0	Protein Destination & Storage			GAGAAACTTGATCCTACTGACAAGAAGAAGATTGAGGACGCAATTGAGCAAGCTATCCAGTGGCTAGACAGCAACCAGCTCGCAGAAGCAGATGAATTTGAGGACAAAATGAAGGAATTGGAAAGCATCTGCAATCCTATCATTGCCAAGATGTACCAAGGTGGTGCTGGTCCTGACATGGGTGGTGCTGGTGCTGGGGCAGCCGAGGATGATTATGCTGCTCCTTCTGGTGGAAGTGGTGCTGGCCCCAAGATTGAGGAAGTGGACTAAATGTGTAGTTGCTTTCATCCATTTATCTGTTTAAAACTTATTTGATGCTTTTTTATTGNATTTTAACTTTTATGATTTTTGTTGGATGGGATACTAATTGTTTTGCCCGTGTGATATGAAC
Gma.11119.3.S1_at	CF922781	At5g53300	2e-83	Protein Destination & Storage			ATGCCATGGGCTAATTGACATAGAGAAGAGAGCGATTTTTACTTTCAGTGTTTAGGCCAAACAGCCTTGTATGAATATTTGTGGTCTTCGATTAAGGCCCCTCCAGTTGAAGATGAATGGGGAAATATTTCTTCTGTTGTCTGTATTGCAGAATGCAAACGCTACTTTTAAAACAGTGAAATGTAAGCCCAATTAAAAAGTTTAAAATTTTAANNNNNNANNNANAGTATTGTCGAATATTTAGAGAATGATTGGTTTGCTCTGTTATTC
Gma.11119.4.S1_at	BE555322	At4g27960	1e-84	Protein Destination & Storage			TGCTCAAGTTTTTAACCGTTCTATTAAGTGCCATTTCATGTTTTTCTTTTGTCATTTATGAACTTA
Gma.11119.4.S1_x_at	BE555322	At4g27960	1e-84	Protein Destination & Storage			GAGCCCTGCGCTAACTATTTCAAAGGTGTTGCTCTCAATTTGTTCCCTGTTGACGGACCCTAATCCTGACGATCCTTTGGTCCCTGAAATTGCCCACATGTACAAGACAGACAGGAACAAGTACGAGTCAACTGCCAGAAGCTGGACCCAGAAATATGCCATGGGTTAAGTGACCTTGTGGTATGTTTGAGGGAGAGCCTTTCTACTCTCAGTGTTTAGGTCTCTCAGCCCTTGTAGGAATATTTGTCGTTTTAAATCATGATTAAGGCCCCTCCAGTTGAAGATGAATGGGGGAAAACGTTTCTCCTGCTGTTTGTATTGCAAATGTTCATGGTAATTTAGAACAGTGAAATGTTGCCCCAATTAAATGTTATGCTCAAGTTTTTAACCGTTCTATTA…
Gma.11119.5.S1_at	BI315933	At4g27960	4e-84	Protein Destination & Storage			TTAAGTGACCTGTGGTATGTGTGAGGAAGAGCCTTTCTACTCCCAGTGTTTAGGCCTCTCAGCCCTTGTATGAATATTTGTCGTTTTTAATAAGGCCCCTCCAGTTGAAGATTAATGGAGCAAAACGTTTCTCCTGTTGTTTGTACTGCAAATGTTAATTTAGAACAGTGAAATGTTGCCCCCAATCAAATATGCTCAAATTTTTAACCGT
Gma.11119.5.S1_x_at	BI315933	At4g27960	4e-84	Protein Destination & Storage			TGATGATCCTTTGGTCCCCGAAATAGCCCACATGTACAAGACAGACAGAAACAAGTACGAGTCAACTGCCAGAAGCTGGACCCAGAAATATGCCATGGGTTAAGTGACCTGTGGTATGTGTGAGGAAGAGCCTTTCTACTCCCAGTGTTTAGGCCTCTCAGCCCTTGTATGAATATTTGTCGTTTTTAATAAGGCCCCTCCAGTTGAAGATTAATGGAGCAAAACGTTTCTCCTGTTGTTTGTACTGCAAATGTTAATTTAGAACAGTGAAATGTTGCCCCCAATCAAATATGCTCAAATTTTTAACCGT
Gma.11072.1.S1_at	BE661461	At5g58710	3e-94	Protein Destination & Storage			TGCTGGTCCTAATACCAATGGTTCACAATTTTTCATTACAACTGTGACAACTAGCTGGTTGGACGGAAGGCATGTTGTTTTTGGTAAAGTTCTTTCTGGAATGGATGTTGTTTACAAGATTGAAGCTGAAGGAACACAAAGTGGCACTCCCAAGAGCAAGGTTGTGATTGTTGACAGTGGTGAACTCCCTCTATAATTGTACTTCNTTGATTCTCAANCAGGACTTGTTGAAGGTGTTCCCAGTTTTCATTTCAATTCCATCTACGAGACTACTTATCTTTTATAAGCATGTTCTAATAGATCAATGACTAGTTGTNTGTTTGTGATACTNANTNGATNAAGTTTNTCCCCCTAATGATAANATGNAAAATGGCATTTGTGAACATGAACATTGTAGAG…
Gma.11115.1.S1_s_at	AI856377	At3g12580	1e-110	Protein Destination & Storage			AGTCGATTAAGCAGACCAATTGTCATGGGTTGTTCTTGATTTTGCGAAGACCCTTTTGAAGTTTAGATAATAACCTGTCTTGTCATTATGTTTTGGATTTG
Gma.11115.2.S1_at	BU764731	At3g12580	0	Protein Destination & Storage			GGCCAAAAATGCATTGGAAAATTATGCCTATAACATGAGGAACACAATCAAGGATGACAAGATTGCTTCCAAACTGTCTTCT
Gma.11115.2.S1_x_at	BU764731	At3g12580	0	Protein Destination & Storage			AAGATGGTGCAGGAAGCTGAGAAATACAAGTCTGAGGACGAGGAGCATAAGAAGAAAGTGGAGGCCAAAAATGCATTGGAAAATTATGCCTATAACATGAGGAACACAATCAAGGATGACAAGATTGCTTCCAAACTGTCTTCTGATGATAAGAAGAAAATTGAAGATGCGATTGAGCAGGCTATCCAATGGCTAGATGGAAACCAACTTGCTGAGGCTGACGAATTTGAGGATAAGATGAAGGAGTTGGAGAGCATTTGTAATCCCATCATAGCAAAGATGTACCAGGGTGCTGGTGGTGATGCGGGTGGAGCCATGGATGAGGATGGTCCTGCAGCTGGCAGTGGAAGCGGTGCTGGACCCAAAATTGAGGAAGTCGATTAAGCAGAAGATTCTCAT…
Gma.10691.1.S1_a_at	BU550066	At3g08690	5e-22	Protein Destination & Storage			ATGGGCTAGCAAATTGGAATAACGCATTATATTATAGGATAGGACGTGTTCCTTCCATTTGTTAAAAGACATTAATGTATAATCTTTCTTTTCATTCCCGCTGTTGACGTATTGAGGATAAGTCTCGTGCTGTCCACATAACAATA
Gma.10691.3.S1_x_at	CA819213	At1g64230	1e-83	Protein Destination & Storage			AAGTTTTCCACCCAAATATCAACAGCAATGGTAGTATTTGTCTTGATATCTTAAAGGAGCAGTGGAGCCCCGCCTTGACAATATCTAAGGTTTTGCTCTCCATTTGCTCCCTATTGACGGATCCAAACCCAGATGATCCCTTGGTGCCTGAAATTGCTCATATGTACAAGACAGACAGGTCCAAGTATGAGACAACTGCTAGGAGCTGGACTCAGAAGTATGCAATGGGCTAGCAAATTGGAATAACGCATTATATTATAGGATAGGACGTGTTCCTTCCATTTGTTAAAAGACATTAATGTATAATCTTTCTTTTCATTCCCGCTGTTGACGTATTGAGGATAAGTCTCGTGCTGTCCACATAACAATAGGAGGATTTTGAGTTTGTTTGTATGAAAC…
Gma.10691.4.S1_a_at	BM523847	At1g64230	1e-65	Protein Destination & Storage			TAATGGGTCCCCCTGATAGCCCTTATGCTGGGGGTGGTTTTCTAGTTACTATTCATTTTNCTNCGGATTATNCATTCAAGCCACCCAAGGTTGNATTTAGGACTAAANNNTTTTCNACCNAAATATCAACAGCAATGGTAGTATTTGTCTTGATATCTTAAAGGAG
Gma.10691.4.S1_s_at	BM523847	At1g64230	1e-65	Protein Destination & Storage			TTGAGGATAGGTAACAGTGCGGTGCGGAGGATTTTTTAGTTTGTTTGTATGAAACTTCTCTTGTGAGTGCTGGGAATTGGGAAATACATGTAGCTGATATTCTTCTGT
Gma.10691.4.S1_x_at	BM523847	At1g64230	1e-65	Protein Destination & Storage			AAGCAACTATAATGGGTCCCCCTGATAGCCCTTATGCTGGGGGTGGTTTTCTAGTTACTATTCATTTTNCTNCGGATTATNCATTCAAGCCACCCAAGGTTGNATTTAGGACTAAANNNTTTTCNACCNAAATATCAACAGCAATGGTAGTATTTGTCTTGATATCTTAAAGGAGCAGTGGAGCCCAGCATTGACAATATCTAAGGTGTTGCTCTCCATTTGCTCCCTATTGACCGATCCAAACCCAGATGACCCCTTGGTGCCTGAAATTGCTCATATGTACAAGACAGACAGGTCCAAGTATGAAACAACTGCTAGGAGCTGGACTCAGAAGTATGCAATGGGCTAGCATGTTGGAATAAGGC
Gma.10883.1.S1_at	CD399178	At4g02890	1e-167	Protein Destination & Storage			TCGCCTTCGCGGTGGTTTTTAAGCGTGTTTTTTTTCAAGTGTTCTTGTTTTAAGCGTGTCTTTTTTCAAGTGTTCTTGTATGTCATGTCTGTTATGTTCAATTTCTCCCTTGAACTTGTTTGCTNTTCTGGTTTAGGTGCTGCTTTTTATGT
Gma.10883.2.S1_s_at	AW350627	At4g02890	1e-129	Protein Destination & Storage			TGGTGGTTTCTGAGTCTGTCTGTTATGTCCAATATTAGTTGAATTCTCTGTTGTTATGTCCAGTGTATGTTGAACTCGTTGGT
Gma.10933.1.S1_a_at	AJ004897.1	At1g65350	2e-40	Protein Destination & Storage			AGAAAAGGTTGATAGCTCTCTTGAGTTTCTTATATTGGCTAGTGATGGGCTATGG
Gma.10933.3.S1_at	CD391545	At5g03240	1e-125	Protein Destination & Storage			AAGGAATCCACGCTTCACCTTGTTCTTAGGCTCCGTGGTGGCGATTTCTAGTTTCAGTTGAATCTTGCTATTGAGATTTTCTCTTCCTTGAATGTGTATGATATAACAAAATTTCTATGTCTATGTTGTCCTTAGGCTCCGTGGTGGCCTTCTCTAGTTTGGTTGAATCTTATTAATCATGTGCACTTCAATTTGAATG
Gma.10984.2.S1_s_at	BQ630694	At1g21750	1e-112	Protein Destination & Storage			GAAAGGAGCTTTTCGTCTCATGGGATATATAGACACAAAGTTACATGTGGGTTGCACACCCTTTTGTATCTCGTTATCAGAATTTAGTGAACCATAGGTGCATCTATCTTCCTTTGATCTTTTTATCTTTTTGGTTTTCTTTATGTATGGTTTTCCTTAATAAAAACGGGAGCTTTTATTTGGCGGATTAGAGTTTAGTGCTGGAAA
Gma.10966.1.S1_at	CD396963	At5g23540	1e-148	Protein Destination & Storage			GATGTTGCTTAATCTTCACAAGAAGAAATGGACTGATGGTTTGACACTTCGGCATTTTGATACACATTCNAAAACTAATGAACAGACTGTACAGGAAATGNTGAACTTAGCTNTCAAATATAACAAGGCTGTTCAAGAGGANGATGAGCTGCCTCCAGANAAGCTTGCAATAGCAAATGTGGGAAGACAAGATGCAAAGAAACATCTCGAAGAGCATATCTCAAATTTGATGTCTTCCAACATCGTTCAAACTCTCGGAATGATGCTTGATACTGTTGTCTTCTAGAGTCATTATTTTGGACCTTCTGGTTTCTGTAGCTGTGCTAAGGAGACAATTTGAGTTATTACAATCACTGTTTCCTTATTCTT
Gma.10802.1.S1_a_at	BI969275	At3g44110	1e-168	Protein Destination & Storage			AAACATCTTGATGGTAGGCAACTATTGATCAAATCAAACCCTGGGGAAGTCATCAAACCAGGTCAATATAAAGCAATAAATGATGAGGGAATGCCACAACACAATAGGCCATTCATGAAGGGTCGCCTTTACATCCAGTTTAATGTTGATTTCCCAGACTCAGGGTTTCTTTCCCCTGACCAATGCCAGTTACTGGAAAAGGTGTTACCTCAAAAGAGCAGCAAGCATGTGTCAGACATGGAGCTGGATGATTGTGAGGAGACCACTTTGCATGATGTCAACTTTAAGGAGGAGATGAGACGAAAGCAGCAACAGCAATATCGCGAGGCATATGATGAAGATGATGATGAGCCATCTGGTCAACGAGTGCAATGTGCTCAACAGTAGTGCAATTTATGG…
Gma.10804.2.A1_s_at	CF921045	At1g80920	0.0004	Protein Destination & Storage			TAGAGTCTAGACCTACATACATGTTCCCACCCAAGTGGCTGGTGTTCTTTGTGTATAGTCCAAGTGAATGTAAAGTGAGTCCTCTCTCTCTGCATAATTGAAGATGAGGAAATGACTCTTTAATCCTTAAGCCTGTGCTCGGTGGAGAAGA
Gma.10827.2.S1_s_at	BQ612452	At1g72610	3e-40	Protein Destination & Storage	Storage Protein		TCAAGAAACTTAAGGCTCGTTTCGGTGGCAGAGGCTAGGAATATTATTGCTCATGAATTTATTCCTATCTAATGTTTGTTGCTATTTATAGTCCATAATAATGCCTGTGTATGCCCTTGCCTTTTCCATTTCGATGTTTGGATCATGTACTTAAA
Gma.16887.1.S1_a_at	BI788030	At4g31300	1e-109	Protein Destination & Storage			GAACAGTCATAATAAACTCAGAGGGAGTGACCAGGAATTTCTACCCTGGCGACCAACTTCCATTATGGCA
Gma.1686.1.S1_a_at	AW350956	At5g58290	0	Protein Destination & Storage			AGAAGCTGGAATGCATGCTGTTCGCAAGAATAGATATGTCATACTGCC
Gma.1686.1.S1_x_at	AW350956	At5g58290	0	Protein Destination & Storage			ATGGCAACTAACAGAGCAGACACCTNTGGACCCTGCTCTGTTGCGTCCTGGAAGGCTTGATCGTAANAATTGAGTTCCCTTTNGNCCTGATAGACGCCAANAAGAGGCTCGTATTTCAGGTTTGCACAGCCAAAATGAACTTGAGTGATGAGGTAGACCTAGAGGATTATGTTTCTCGTCCTGACAAAATCAGTGCTGCTGAGATAGCAGCCATTTGTCAAGAAGCTGGAATGCATGCTGTTCGCAAGAATAGATATGTCATACTGCCGAAGGACTTCGAGAAGGGTTACAGGACAAACGTGAAGAAGCCTGATACTGACTTTGAATTTTACAAGTGATGATGTTGTAGCTTTGAGATTGGTGTGTGTACTCGCGAAGTTAAATATACAGTGAAGGGGG…
Gma.16719.1.S1_at	BI970910	At3g11910	1e-180	Protein Destination & Storage			AATTCTTTCTGTCAACGGATCTCAACACTGTCTGCCGACCACNGCCCGTTGAGCTTTACTACTTCCAACTNNGTGTGGAAGTTGTTCAAGTTGNGGTCATTGATCATCATCACTNNACTGTANCAGTACATAAGATTTTTGGATTAGTGAGTGTATACAGGGTATAGTTGGTTGACTNTTTTTTTNNNNNGTTCATCTTGATTGCTTCCAGATTTTGTTCANTCAGTAGTGTTANTTTAAGTGANGGGCTGCAAAATGGTGTNNNGCAGAGTTAATGTAATGTTGTAAAAGAGACTCGC
Gma.16756.1.S1_x_at	BI967486	At3g52560	1e-73	Protein Destination & Storage			ATTGGCAAAGAGAGTACACCATGGAGGACATACTGACCCAGCTGAAGAAGGAAATGGCNGCTCCTCATAACCGGAAGCTTGTCCANCCTCCNGAAGGTACCTACTTTTAGCANCCNNCAAGATGGTATAGATGTNGGATCGNATTGCATATNNGCTGNATGCAATATATAGTGTGTAATGCTTTGTNGATCCNTCCTTCTGAATTCNAGAACATANNGGGGAATGCCCCGAAAAGCTTCATNTTTCNATCTCCATGGCTTCAGAGTTGTTTTGTTGTCTTTGT
Gma.16563.3.S1_a_at	BE607683	At4g19006	5e-85	Protein Destination & Storage			TTATGTCGGGTGCATAATGCTGCTTTAAGAGCCCAACCAGCACTAGTTCAAAATGAGCAAAAGTTGTTGGAAAAGATCAACATTCTGTGTCTGATGGAGATTATATTCAGTCGGCCTTCGGAAGATCGAACTATTCCCTTGAGTGTAATTGCAGAGCGCACAAAACTTTCTATAGAGAATGTGGAGCATCTCCTTATGAAAAGCCTATCTGTTCATCTAATTGAGGGTATAATTGATCAAGTTGAGGGCACAGTGCATGTTTCCTGGGTGCAGCCAAGAGTTCTGGGTATTCAACAGATCAAATCCTT
Gma.15488.1.S1_s_at	CD399398	At1g16890	1e-75	Protein Destination & Storage			ATTTTTGCCAGAAGAATATCCAATGGCTGCTCCAAAGGTTAGGTTTCTAACAAAAATATATCATCCNAACATTGATAAGCTTGGCAGGATNTGTCTTGATATTCTGAAAGATAAGTGGAGTCCTGCNCTTCAGATNCGCACTGTTCTANTAAGCATTCAAGCTCTATTNAGTGCACCAAACCCAGATGATCCACTTTCTGAGAACATTGCCAAGCATTGGAAATCTAATGAG
Gma.15883.1.S1_s_at	AF255338.1	At3g14290	3e-90	Protein Destination & Storage			TACACTGATCCATCTGGCACATTTTGGCAATGCAATGGCAAAGCTATTGGTTCAGGGTCNGAAGGNGCAGACAGTTCTCTACAAGAACAATTCAACAAGGACCTAACCCTTCAAGAAGCCGAGACNATTGCTTTATCCATTTTGAAGCAAGTTATG
Gma.15883.1.S1_x_at	AF255338.1	At3g14290	3e-90	Protein Destination & Storage			TGTCCCGACCATTTGGAGTATCTCTCCTCATTGCTGGTCATGATGAGAATGGACCTAGCTTATACTACACTGATCCATCTGGCACATTTTGGCAATGCAATGGCAAAGCTATTGGTTCAGGGTCNGAAGGNGCAGACAGTTCTCTACAAGAACAATTCAACAAGGACCTAACCCTTCAAGAAGCCGAGACNATTGCTTTATCCATTTTGAAGCAAGTTATGGAAGANAAGGTCACTCCCAACAACGTTGACATTGCCAAGGTGGCTCCA
Gma.1602.1.S1_a_at	BI971053	At5g67380	1e-157	Protein Destination & Storage			ATAAGTATCATCTGGAGCTTGATCCTCAACTTGATGCACT
Gma.1602.1.S1_at	BI971053	At5g67380	1e-157	Protein Destination & Storage			ATAGCTAAGGTGCTTGGGACTGATGAANTGAANGCATATCTNAATAAGTATCATCTGGAGCTTGATCCTCAACTTGATGCACTNGTTGGNAGNCACAGTCGNAAGCCNTGGTCTAAATTNATCAATGCAGATAATCANCATCTTGTGTCTCCTGAGGCAATTGATTTTCTTGATAANCTCCTTCGATANGATCACCAGGACAGGNTAACAGCNAGAGAAGCAATGGCACATCCATATTTCTCTCANGTAAGGGCAGCTGANAGTAGCAGAATGAGGACACAGTAACTTNANNCANNNNNGGATCCATNANCNTGAGTTNNANATATNTGGGATTGTTTTATAATACNNCCTNAAATGTGGCATGGTTGCCTTCTNTNNNANNNATNNNTTNTNNNNNNT…
Gma.1623.1.S1_at	CD404324	At2g20580	0	Protein Destination & Storage			CTTCCTCGTTTTGGCAATGCAGCCAAGGATGTTGTTGACTGTGGATGAGAACTTGAAGCCTCTNTCAGTGCCTGTTCGTGTTGGACAAGCCGTAGATGTTGTTGGACAAGCAGGTCGTCCGAAAACAATCACTGGCTTTCAGACCCACTCCACCCCTGTTCTCCTGGCTGCTGGGGACAGGGCGGAGCTCGCAACGGAAAAATACATTCCCCTATCACCAATTCTTGAAGGTTTNGTAATNTTGAAGGAGAATCCAGATTACAGGGAAGAGTGAGANNNACCACNGTNGTGATGCTTTTTTCTTTTGTTCCAAGTGTCTGAACAGTAGTTAGTTAAAATGTATTTGAAATTGTGNCAAAATGTAGAAGAAATTATTTTNNAAATCATTTCTTCGTTTGG…
Gma.1634.1.S1_at	AF169022.1	At3g44110	1e-156	Protein Destination & Storage			ATGATGACATGCCTGGTGGTGCACAGAGGGTACAGTGCGCCCAGCAGTAATGACTTTGTGTGGAAGCTAGATTCAGAATTGATGAAAATGATGATANNANNNTNATACTGTTGATGTTCCATAACTGTAGTGTGTGGCTTAAAGATAAGTAGTGTTTGATGAAATGATTGTGAGAAAGTGAACAGTGTATCACTTGCGTTTTTATTATTGTCGAAGGG
Gma.1258.1.S1_at	AW433155	At1g14980	2e-09	Protein Destination & Storage			GCACTGAATGTCACGATGCCGATTTTTTATTTTGCTGTGGATTTCGTGTGAGCGTTATTGATTCGTTCTACACATAGACGTTTATTGTTGTTGATTTATACTGTAATTCGTTACGGAGTGATGATTATTACGCGTTGATGTTGATCTATGTATACTTGAGAGAGAGAGAGAGAGAGAGAGAGAGAGAGAGAGATTTTAATTGTTTATGTATAAAATCATTTGTTATAGGTGTTAGTGAGAAATGAGATCCAAAAATTCTTGTATCCTTCTTCAGTGATTATTATTTTGATTTCAGTCTCANNNNNNAANNNANNANANNNNNNNNAAANNNANNANNNANNANCCTCGACCTCCAGGCTAAATTCTGGAAAAGTTATTGCTGTTGCCCCTGGCTTTCCC…
Gma.1299.1.S1_at	AW309777	At2g33770	1e-142	Protein Destination & Storage			CCTTGTCACCTGCAAATCCATTTTGTATCTATTAAGAAAGCCTCCCAAGCATTTTGAGGCATTGGTGGAAGAGCACTTTAGACAATGCTCCAAACATATACTTTTGGCTTGTAAGGCATATCTTGAAGGAGCTCCTATNGGATGTGGTTTTGGTGGTGGAAAAGCTGAGCATGAAAACCAAAAGGGAACTTCTACTGGATTTAAAATAATGCTTGCTAAGCTCTTCCCAAAGCTAGTAGAGGCATTTTCTGACAAGGGAATCGATTGCAGCCAGTTTGCTGAGATGCAAAAGTAATTGTCTGTTCTACCTTGTTGTGAATAAGCCGTCCAGCTTTCTGTCAAGGATATTCAAACTTTATGTGTAATATTAATTTGTTTTCACTTATCTTGTATAATATC…
Gma.12718.1.S1_at	BE657494	At1g75760	3e-26	Protein Destination & Storage			ATCTAGAAGCTGTCTCAGTCCTGCCCCAACTGCGGGTCATGCAGAACANCNAGNATNGTTGANCCNTTCACAGCTCANTANGTATTTGCANTGGGTGTTGCAAGATTCTTGAGCTGNGCTCATTGGGTTCTTCAGGTGTTAGATAGCCGTGGGCATTTGNTGGTGGCCTTGGGGTATGGTTTATGGCCATCAATGGTTCTTATCTCGGAAATTNNCCAGACCTTCATNCTTANCAGATTTCTGTTACTATTATGTCAAAANGTGTCTTCGGGGGACANCTTGTTCTACGTCTTCCCTCTGGAGTGGTGTGATTGAAGATCTGCTTTGGTGTGTACTGTCACATTTGATTTTAACTTAATCAGGCNTTATGGTTGGTTACCCTTGTTCGAGTACATT
Gma.12215.1.S1_at	BM307262	At5g27430	4e-81	Protein Destination & Storage			TCTGCACAAGTCCAGGTTCTGAACATCAACTGGTTTCAGAAACAACCCAATGGCAACGACGAGGTCAGCATGACGATGAATATTTCCGCAGACTTGCAGTCCCTTTTCACATGGAACACAAAACAGGTTTTTGTTTTTCTAGCTGCTGAGTATGAAACTCCTAAGAATTCCTTGAATCAGATATCCCTATGGGATGGTATCATTCCCTCTAAAGAGCATGCAAAGTTTTGGATTCATACATCAAATAAATACCGCTTCATCGACCAGGGGAGCAATTTGCGTGGCAAAGAATATAACCTGACTATGCATTGGCATGTTATGCCGAAGACTGGCAAAATGTTTGCTGATAAAATAGTCATGCCAGGTTATCGATTGCCTCAGGAATATAGATGATGCCCT…
Gma.1372.1.S1_at	AW309996	At3g44110	1e-99	Protein Destination & Storage			GACTCACCTGGATAGCAGGCAGCTTCTGATCAAATCAAACCCTGGGGAGGTTGTTAAGCCTGAGTCATTCAAGGCAATAAATGATGAGGGAATGCCAAACTACCAGAGGCACTTCCTGAAGGGAAAGCTTTACATTCATTTCTCAGTGGAATTTCCTGATACCCTGAGTCTTGATCAGGTGAAGGCTTTGGAGGCTGTTCTGCCATCAAAGCCAACATCACAGTTGTCAGACATGGAGCTGGATGAGTGTGAGGAGACCACACTCCATGATGTGAACATGGAGGAAGAGACAAGGAGGAGGCAACAAGCTCAGCAGGAGGCATATGATGAGGATGAGGATATGCATGGTGGTGCTCAGAGAGTGCAGTGCGCTCAGCAGTAATGAGCCACAGGAGCGCT…
Gma.1464.1.S1_at	AW100876	At3g25230	1e-36	Protein Destination & Storage			GGAAGCAGAAAAATTGTGTACCAAGGTGTTAGACCTCGAGAGTACAAATGTTAAAGCCCTCTATAGAAGGGCCCAAGCATATATGCAGTTAACTGACTTGGATTTGGCTGAACTTGACATTAAGAAAGCTCTTGAGATTGACCCTAANNANCAGGGATGTCAAATTGGAGTACAGGACTTTGAAGGAAAAGGTGAAAGCGAATAATAGAAAGGAGGCGCAATTTTATGGAAATATGATCAACAAGATGACAAAGATTGGTTCCTGATAGCAATAAACCAGCTACCAAGTACCAACGGTATTGAATCCGTGGGTACTGGCAACAAAATCAAAACGTCATCCAATATGGAACGAGTAGAAGTTTAGTCCCTGTTTTCCTG
Gma.14338.1.A1_at	CF923111	At2g28680	3e-13	Protein Destination & Storage	Storage Protein		TTGAGAGTTACTCCATCGTAATAACTACAAAGCCATTGTTTGAAGAATTGGCTGGAAGGAGATCAATTTGGAACGCCTTTTCGCCTACACTGCAACAAGTGTCTCTTAACGTGGATTCTGATTTTCAAAAGTTTTTCATATCCAAGATCAAGGAATCTACCAATCTCATCCCTCCTACTGTTTAGTTCGATGCGTGTGATGTACGTACTACCGTATTTGTCTATGTATAATTTTCAGATGATGATGATATCGATTTAAGAAAATTCTAAACTTTTATCTTTCTAAAAGTTATGCCGTTG
Gma.15216.1.S1_x_at	CD394442	At1g55060	9e-24	Protein Destination & Storage			GCGCAAGAAGAAGACCTACACCAAGCCCAAGAAGATCAANCACAAGCACAAGAAGGTCAAGCTCGGCATTCTNCAGTTCTACAAGGTCGACGATTCTGGAAAAGTNCAGAGGCTCCGCAAGGAGTGCCCCAACGCCGAGTGNGGNGCCGGNACNTTCATGGCCAANCACTTCGACCGCCACTANTGCGGCAAGTGNGGCTTGACCTANGTCTACCAGAAGGCCGATGCTTAANNNNNTTNNNNNNNNNNNNTNCNNNGGTTNTANTTTNATTTTAGTNATTTAAAAGTTTTGGTTTATGTTTTTGTTCAATTAGTGTTATGACTGTTTGGG
Gma.15387.1.S1_s_at	CD399274	At5g41700	1e-83	Protein Destination & Storage			TGGCAAGCCACAATCATGGGACCTGCTGATAGCCCATATGCAGGTGGTGTTTTCCTAGTTTCAATTCATTTTCCTCCTGACTATCCCTTCAAGCCACCAAAGGTTGCTTTTCGGACTAAGGTGTTCCACCCAAACATCAACAGCAATGGCAGTATATGTCTTGACATT
Gma.2063.1.S1_at	AB070857.2	At1g11910	1e-167	Protein Destination & Storage			TCCTTTGTGTTCTTCTTGTCAGATGCTTGTTCTTTGGATCCAGAATCAACTAAAACAAAAGGCAACGAAGGACAGAGTATTCAACTATGTGAATCAACTGTGTGAGAGCCTNCCAAGTCCATCTGGAGAGTCAGTGATAAGCTGTAATAGTCTTTCCAAGATGCCAAACATTACNTTCACAATTGGAAATAAACCTTTTGTCCTCACACCAGAGCAGTATATTCTAANAACTGGAGAAGGCATTACAGAAGTCTGCCTTAGTGGGTTTATTGCTTTTGATGTTCCTCCTCCAAAGGGTCCATTGTGGATTCTTGGCGAT
Gma.1973.2.A1_at	BE823307	At2g30110	2e-38	Protein Destination & Storage			CTTGTGGAAGTTGCCTACTCTATAATAGCATGTTCCCTAGGCATAAGGATCGAATGGACAAAAAGGTTGCAGATCTGGCAAGGGATGTAGCCAAGTTGGAAATTCCTTCCTACCGTCGCCATTTGGATGTTGTTGTGGCATGCGAGGATGACGAGGATAATGACATCGACATCCCTCAGATATCCGTTTATTTCCGTTAGTAGGTGGCTTTCTTCTTCATAGAGGTGTGTTTGAGACTTAGGTGAAAACGACAGCAGCCAGCATGTTTGACTATATTT
Gma.17931.1.S1_s_at	AW350692	At2g30440	6e-33	Protein Destination & Storage			TCCCCTGCCGGTTGAGAACATTGTTGGTAGGTCCATGTTTCGGTACTGGCCTCCATCCAAGGCATCTGACACTGATACCCATCGTAAACTCCCACCTGGTAACAAACCTGTGGCAATTTCTTGACATGATTCCCGCAGCTTTGTGAAGGTGATGAAGGTTTCCAGATACGGTCGTTTGTTCTAAATTGTTAGCTTGAGCTGACTTTGCACACAGTTTGGGATGAATATCTTATTCATTGATACAAATTTGTCGATGACCTAATAATACCATTAAGCGTTCATTAGTGCCATCTGAGAT
Gma.17595.1.S1_s_at	BI967850	At5g41700	4e-84	Protein Destination & Storage			GGTCCTGCTGATAGTCCTTATGCTGGAGGTGTATTCCTAGTCACTATTCACTTCCCTCCGGATTATCCTTTCAAGCCTCCTAAGGTTGCCTTTAGGACTAAGGTGTTTCACCCGAACATCAATAGCAATGGTAGCATTTGTCTTGATATCCTNAAGGAGCAGTGGAGCCCTGCACTCACCATCTCTAAGGTACTGCTTTCTATCTGCTCATTGCTGACTGATCCAAATCCTGATGATCCACTTGTTCCGGAAATCGCTCACATGTACAAAACTGACCGGGCCAAGTATGAGGCCACTGCACGCAGCTGGAC
Gma.1774.1.S1_at	BG652905	At5g49910	1e-138	Protein Destination & Storage			TACAACCAACCAGGAGCTGCAGGCGCAGGAGGGCCAACACCACCACCCGGTGCCGACTCTGGCCCCTCAGAATCCTCAGGCAAGGGACCCGACGGTGATGTCATTGATGCAGATTTCACTGACTCTAAATGAGCAGGCAACTAGTTATTACCAATAGAGAGTATATGTTAGTATTTTTTCCCCCATTATATGTTTTCTTCTGTTCCAAATTCTTAATAATTTTTGTCAATGGAGAGTGGGTGCGTGTTTCCTTCAAATATTAGACACGGATTTCATAGGTTCGAATTGATGCTCGCTTTGTACCCTGGAATTTTGTCTCAGTAACAACACTGGTATTATTATGCGTGGCAAANNANNANANNNNAAANNNNNNNCANNAANNNNATGAAACGTGATGAC…
Gma.17719.1.S1_at	AI960464	At1g78870	6e-84	Protein Destination & Storage			TTGGCTTCAAATAACTATAGTGTGGGAGTGTATGCTATATAACTGTCAAATTGAAATGGAAATTTGGAGGAATTGTCTAAACTATTTTGGAGTTAATATTCCCCGTAGCTTCCGGTTACCTGTTAATTACTTTCTTTCTCCTGGAAGCATTATCTTGGAACTTGTATGAAAAATATGTGATCTTTTCTGTGACAAATTTAAACATGCTTCATCTCCCAACTCCTGAGTAATTTGGGATCCTCAA
Gma.17733.1.S1_s_at	CD410026	At2g38870	9e-15	Protein Destination & Storage			GATGCTAACACTGTGCTTAAAGGATCCATCGTCACCGCTGATTTTCGATGTGATAGGGTTC
Gma.17896.1.S1_at	AW309257	At1g50380	1e-68	Protein Destination & Storage			GACTGATGATAACATACTGCTGTTTAAATGCGAGCTTGGTGCTGGACATTTTTCCAAGTCGGGAAGATTTGAGAAGCTCCAGGAAGATGCCTTCACTTATGCATACATCATGAAGACTCTAAACATGACTAGTCGGCTTTAGTCTTTCAATGCGTGAGGCGCAGATGCAATTGATAATTGANNATTGAGATAGACCAATTATTACATTCATNGCTTGAGTGAGATCATCTGCGTAAATACCATCATCTTAGGAACTACATTGCCAACAACTTCAGAATAAAATCTGAAATTACCTTTGCAATTCAGAAAGCATGTCATTGGTGCAATTCTATTAGTAATATCCTACTAATGGATGATGTGGCAATTAAGGATGGTGCATTTGTGTGTTTGGATTTGGTA…
Gma.17451.1.S1_at	AW350045	At5g20620	0	Protein Destination & Storage			CAAAGAGGGGATTCCACCAGACCAGCAGAGGCTTATCTTTGCTGGGAAGCAGCTGGAAGATGGTCGTACTCTTGCTGATTATAATATCCAGAAGGAGTCCACTCTGCATTTGGTGTTGAGGCTTCGTGGAGGTATGCAGATATTTGTGAAGACTCTGACAGGGAAGACCATTACCTTGGAGGTGGAAAGCTCTGATACTATTGACAATGTGAAAGCTAAGATTCAGGACAAGGAAGGTATCCCTCCAGATCAGCAGAGGCTCATTTTTGCTGGGAAGCAATTGGAAGATGGTCGTACCTTGGCAGATTACAATATTCAGAAGGAATCCACTTTGCATCTTGTCCTTCGCCTTCGTGGTGGTTGCTAAGGGGAATCCCTTTTATGAAGTGTTCTCATATG…
Gma.17451.1.S1_x_at	AW350045	At5g20620	0	Protein Destination & Storage			CAAAGAGGGGATTCCACCAGACCAGCAGAGGCTTATCTTTGCTGGGAAGCAGCTGGAAGATGGTCGTACTCTTGCTGATTATAATATCCAGAAGGAGTCCACTCTGCATTTGGTGTTGAGGCTTCGTGGAGGTATGCAGATATTTGTGAAGACTCTGACAGGGAAGACCATTACCTTGGAGGTGGAAAGCTCTGATACTATTGACAATGTGAAAGCTAAGATTCAGGACAAGGAAGGTATCCCTCCAGATCAGCAGAGGCTCATTTTTGCTGGGAAGCAATTGGAAGATGGTCGTACCTTGGCAGATTACAATATTCAGAAGGAATCCACTTTGCATCTTGTCCTTCGCCTTCGTGGTGGTTGCTAAGGGGAATCCCTTTTATGAAGTGTTCTCATATG…
Gma.1756.1.S1_at	BF324935	At4g32940	0	Protein Destination & Storage			TTGTGTCAGTATTCCTTCCAATCCCTGGAGTTCTCTGCAAAGGGGTTTCAGTGCATAATAACTCCCTGTAATGTGCACTAGTAAAGACCAAAGTATGATTATTGTTACATTATGTTACATGGTTGTACTTGTATATACATATCTTGTCCCACCTTTGTAAATACAATTGGGACACTACTAGGATTGGGAAGAAGGGTCTTTACATTTATAGTTTGGCAAATAGATATTGCAACTACCTTTGTATAATTCTATTTCTGAAGAAGCAATTACAATTTACAAGGGATGGTGCCATTTACGGCATAAGGATTAAGGAGGGATAAAGGGACCAATTGCTTTGGAATATCCACTCATTACAATGCATGTATGACAACACAT
Gma.1756.1.S1_x_at	BF324935	At4g32940	0	Protein Destination & Storage			TTGTGTCAGTATTCCTTCCAATCCCTGGAGTTCTCTGCAAAGGGGTTTCAGTGCATAATAACTCCCTGTAATGTGCACTAGTAAAGACCAAAGTATGATTATTGTTACATTATGTTACATGGTTGTACTTGTATATACATATCTTGTCCCACCTTTGTAAATACAATTGGGACACTACTAGGATTGGGAAGAAGGGTCTTTACATTTATAGTTTGGCAAATAGATATTGCAACTACCTTTGTATAATTCTATTTCTGAAGAAGCAATTACAATTTACAAGGGATGGTGCCATTTACGGCATAAGGATTAAGGAGGGATAAAGGGACCAATTGCTTTGGAATATCCACTCATTACAATGCATGTATGACAACACAT
Gma.17525.1.S1_s_at	BG839191	At5g56030	1e-150	Protein Destination & Storage			GACAAATCCGTGAAGGACCTTGTTCTGTTGCTGTTCGAGACTGCTCTTCTCACTTCTGGTTTCAGCCTTGACGAACCCAACACTTTTGGAAACAGGATCCACAGAATGTTGA
Gma.17525.1.S1_x_at	BG839191	At5g56030	1e-150	Protein Destination & Storage			AACAGCATGGCAGGATACATGTCAAGCAAGAAGACAATGGAGATCAACCCTGAGAACCCAATCATGGAGGAGCTCAGGAAGCGTGCGGATGCTGACAAGAACGACAAATCCGTGAAGGACCTTGTTCTGTTGCTGTTCGAGACTGCTCTTCTCACTTCTGGTTTCAGCCTTGACGAACCCAACACTTTTGGAAACAGGATCCACAGAATGTTGAAGCTTGGACTGAGCATCGACGAGGATGCAGCTGAAGCTGATGCTGATGCTGATATGCCCCCACTGGAGGAGGAGGCTGAAGCTGATGCTGAGGGCAGCAAAATGGAGGAGGTTGATTAAACTTTTATATCATGCGGAACGGAGTTGGCTATGTTTTTTCTCTTTTTTTCCTTTCGGATTGCTCTG…
Gma.17539.1.S1_at	AF034572.1	At5g35590	1e-126	Protein Destination & Storage			TTCAGACTGCCATTTCTGCCCTGCAATCAGTTCTTCAGGAGGATTTTAAGGCCACTGAGATTGAGGTTGGAGTGGTGCGGAANGANAATCCAGAATTCAGAGTTTTAACCACCGANGAAATTGATGAGCACTTGACTGCAATAAGTGAGCGTGACTGAGTTCTTGATAAGGAT
Gma.1751.1.S1_s_at	BE473710	At3g02090	0	Protein Destination & Storage			AAGATGATGTTACACGTGCTCGTAATCAGTTGAAATCTTCACTGCTACTACACATAGATGGAACAAGCCCAGTGGCTGAAGATATTGGTCGTCAGCTACTCACATATGGTCGAAGAATCCCATTTGCTGAATTGTTTGCTAGAATTGATGCTGTTGATGCCAGTACAATTAAACGTGTTGCGAACCGATTTATCTATGACAAGGATGTTGTTATTGCTGCCA
Gma.2478.1.S1_at	CF921737	At3g25220	3e-54	Protein Destination & Storage			GGGAAAACTCACTGATGGAACTGTTTTCGATTCTAGCTTTGAAAGAAATAATCCAATTGAATTTGAGCTTGGTACTGGTCAAGTGATCAAAGGTTGGGACCAGGGATTATTGGGAATGTGTCTTGGTGAGAAGCGNAAGCTGAAAATACCANCNAAACTTGGCTATGGAGANCAGGGTTCCCCACCCACTATTCCAGGTGGTGCNACACTCATATTTGACNCTGAGCTTGTGGGAGTGAACGACAAAAGTTTAGGCGAAG
Gma.2350.1.S1_s_at	BI970635	At5g60640	1e-174	Protein Destination & Storage			TCTCTTGTAATAGCCAAGATGGATGGAACAACAAATGAGCATCCCAGGGCTAAGCCTGATGGATTCCCCACTCTTCTCTTCTTCCCGGCAGGAAACAAGAGTTTTGACCCTATTACTGTTGATACAGATCGTACAGTGGTAGCCTTCTACAAGTTCCTCAAGAAACATGCATCAATCCCATTCAAGCTCCAGAAACCAACCTCAACTTCTGAATCCGATTCCAAGGGGAGCTCTGATGCCAAAGAGAGCCAGAGTAGTGATGTGAA
Gma.2259.1.S1_at	CD392275	At1g16470	1e-108	Protein Destination & Storage			CAGGTGGATCCATCAGGTTCATATTTTTCTTGGAAAGCTTCTGCTATGGGGAAAAATGTTTCTAATGCAAAGACGTTTCTTGAGAAGAGGTACACAGATGATATGGAGCTTGATGATGCAGTCCACACAGCAATATTGACTCTGAAGGAAGGGTTTGAGGGACAGATCTCAGGAAAAAACATTGAAATTGGCATAATTGGAGCTGATAAAAAGTTCAGGGTATTGACACCAGCTGAAATTGACGACTATTTGGCTGAAGTAGAATAATCTGCAATGAAGAANCTCTTGTGTTCCTGAAGTTGTTTGTTTCACAGTTGGGTTTAATTGGTAGCTTAATTATTGACATTGTGATGGCAATAGTGAATTTGCGAGCTACTCGTTGTGATGACCANCAAGCCT…
Gma.2534.1.S1_s_at	BI967545	At4g02890	1e-169	Protein Destination & Storage			GAAGAACTTTGATGTTTAATGGGTCTGTAATAAT
Gma.2534.2.S1_s_at	CD393721	At4g02890	1e-71	Protein Destination & Storage			GGGTTTTAAGCTGGAGCTGATTTCTGTGTGATGTTCGATGTTGGATTTTCCCAAACATTTTAAGAAGAAATGTGATGTGTAATGGGTCTGTAATGACCTTTGAAAATAAGTTTGGTTTGTGTTGAACTCTATTGTCCCATTAATGTTACTACTGTTTGTTAT
Gma.2534.7.S1_x_at	AW133169	At4g05320	1e-26	Protein Destination & Storage			CAAGACTCTCACTGGCAAAACCATAACCCTAGAGGTCGAAAGCTCTGACACC
Gma.2590.5.S1_at	CA935591	At1g63800	6e-78	Protein Destination & Storage			ATTTCATGTTTAGCACTTTCAAGTGANTNNNNTGTGCTGTTTAGCCATGGTAATTTAATCAACAATGTTAGCACANNGTGTATAAATGACACTCCTTGTATTGGGTGATTCATGTTTGTTCCATTAAA
Gma.2587.1.S1_s_at	CD404912	At5g66140	1e-108	Protein Destination & Storage			TCTGGCCAGGAGACTGTCAAGTTGGCTATTCGCGCATTGCTTGAAGTTGTTGAGAGTGGAGGGAAGAACATAGAAGTTGCGGTGATGACTAAGGAGCAGGGTCTGCGTCAACTGGAGGAAGCCGAAATTGATGCCATCGTTGCTGAGAT
Gma.2892.1.S1_at	CD398484	At1g29150	1e-110	Protein Destination & Storage			CATTCTAAGCGGTCCCTTAAGTTGTTTGAAATTGCTTTGAGGGACTACAAGGCACAGTTGGAGGAAGACCCAATTGTACACAGGCACCTTTCATCCTTGTACGATACCCTTATGGAGCAGAATCTTTGCAGATTGATCGAGCCTTTCTCAAGGGTTGAGATTGCACATATTGCTGAACTTATTGAACTTCCCACCGATCATGTGGAGCGGAAGTTGTCTCAGATGATTTTGGACAAGAAGTTTGCTGGAACATTGGATCAAGGTGCTGGATGCCTTGTCATATTCGACGATCCCAAGACTGATGCTATATATCCTGCTACTCTAGAGACCATTTCCAATGTTGGGAAAGTCGTGGACAGTCTTTATGTTAGGTCTGCCAAGATAATGGCATGAGCACTC…
Gma.2954.1.S1_at	CD404770	At4g26840	2e-44	Protein Destination & Storage			GAAGAAGCGTTCTTTCGGAGAGTTCGAAGATGTCGGGCGTTACCAACAACAACGAGG
Gma.2954.1.S1_s_at	CD404770	At4g26840	2e-44	Protein Destination & Storage			GGAAGACAAGAAGCCAACCGAACAGGGAGCACACATCAACCTTAAGGTTAAGGGGCAGGATGGGAATGAAGTTTTTTTCAGGATCAAGAGAAGCACTCAATTGAAGAAGCTTATGAATGCTTACTGTGACCGACAGTCGGTGGATTTCAACTCCATTGCTTTTCTGTTTGATGGACGCCGCCTCCGAGCTGAGCAGACTCCAGATGAGTTGGA
Gma.3543.1.S1_at	BE822399	At1g44350	1e-152	Protein Destination & Storage			GATTGTGGAACAGGCTAGTGTCTACAGATGCTTGGCAGAAGTTGACTTCTTTGAAAAGGAGTACACAATTTACCCTCCCACGGTTAATGATAACCGAATGTATGAGCATGTGAAAAAGGTGTCCATTGATTTGCTGGGTCATAAGAATTTCAGGGTAGTTCCACCTATGATGGGTGCTGAAGATTTCTCTTTCTACTCCGAGNTGGTTCCCTCAGGTTTCTTCTACATAGGAGTAAGGAATGAAACANTGGGGTCTACTCATACGGGACANTCTCCATATTTCATGATTGATGAAGACGTTCTACCAATAGGTGCTGCTGCTCATGCTAGTATTGCAGAGAGGTACCTCATTGANCATGGTTGATGTTGGAANATAGTTNAAAGANCNCTGCTCTTGTT…
Gma.3341.1.S1_at	BQ299022	At4g28880	1e-55	Protein Destination & Storage			GCTTTTTTCCTAAGGTGACTGCAAACGATTGTTTGGTATAAATTACAGACTACCCAGGCTTGGCTGCTTTGCTGTATATAGATTTCAAATGTGACACGCAGCAATCTTGTGTATCCATGTTTTTATGTAAAATTAATGCGTGAATGTAGCCCTGTTTCCCCTTTTTGTTACTTGATGATAATTATCATTGGGCCATATGTTATATGGTGACTCAGTTTCATTTAAATTGATTGACGATATTATGAATTGTAGGTGTATTTTCAGTTGGTTCTGTTAAGGTATATTT
Gma.3353.1.S1_at	BI944024	At1g79940	1e-126	Protein Destination & Storage			TTTGACTTGCTATTGTTTGTGTGATTCTTGGTTGGGCTGTGACAGAAGGACAAATTTAAAGCTCAAAGTTTTGAAACGNACTCGGGCTGGCACCAGGGNTGCTGTTTTGGCTGATGAAGGACCTATCATGGAGGATGGAGTTGAGGAGGATGAGGACAACGAGGATGAAGAGTATGATGATGACTANGAGAGTGAGTACAGTGAAGATGAAGANGATGNNCAGAACACAAAAAATAAGNAACAAGCTGNCAATGGCNCNGTGAATAAACATGGNAAAGCTGCAGAAAGTTCAGGCTCTGANGANGAATGAGAAGTTTTTTCTAACATNANAGAANCNTAANTTTCATCTTTTNCCNTCTTGGATGGTAGAANTATNAACTTGTAGCAGTAATAGTCTAN…
Gma.3735.1.S1_x_at	CD391849	At2g02760	6e-78	Protein Destination & Storage			CGATTTGTGTCTCGCATGTTTCATCCAAATATTTATGCTGATGGAAGTATTTGTTTGGATATANTACAAAATCAGTGGAGTCCTATNTATGATGTGGCTGCTATACTCACATCTATCCAGTCATTGCTTTGTGATCCCAACCCAAATTCTCCTGCAAACTCTGAAGCAGCTCGAATGTTTAG
Gma.3735.2.S1_at	BU545833	At2g02760	4e-86	Protein Destination & Storage			AGCCACCAACTGTACGATTTGTCTCTCGAATGTTTCATCCAAACATTTATGCGGATGGAAGTATTTGTTTGGATATATTACAAAACCAGTGGAGTCCTATATATGATGTAGCTGCTATACTCACTTCTATCCAGTCATTGCTTTGTGATCCCAACCCAAATTCTCCTGCAAACTCAGAAGCAGCTCGAATGTTTAGTGAGAACAAGCGTGAGTACAATCGAAGAGTGAGAGAAATTGTGGAGCAAAGTTGGACAGCTGACTAAGCTTATCTTCGCATGCTTGTGGGCCTTTGAAGTCATGAATTAGATTGCACTGCTGGAATAAGAATCATTGTGCCAACTTACTGAATTTTATGCCGCATTCCTTACTCTTCTGAATGTTAGGATCATCTCATCTTTA…
Gma.3735.3.S1_at	BU764012	At2g02760	2e-63	Protein Destination & Storage			CATTCTCATATTATTGTCGCCACTTCGACCTCAATCA
Gma.3735.3.S1_s_at	BU764012	At2g02760	2e-63	Protein Destination & Storage			CAATGTCGACTCCTGCTAGGAAGAGGCTGATGAGAGACTTCAAGAGGCTGCAACAAGACCCGCCTGCAGGGATCAGCGGTGCCCCCCAGGATAACAACATAATGCTGTGGAATGCTGTCATATTTGGTCCTGATGATACTCCATGGGATGGAGGCACGTT
Gma.3735.3.S1_x_at	BU764012	At2g02760	2e-63	Protein Destination & Storage			CATTCTCATATTATTGTCGCCACTTCGACCTCAATCACCCTCGCGCCCTCGCTCTTCCCTTCCTGGTGGCGACAATGTCGACTCCTGCTAGGAAGAGGCTGATGAGAGACTTCAAGAGGCTGCAACAAGACCCGCCTGCAGGGATCAGCGGTGCCCCCCAGGATAACAACATAATGCTGTGGAATGCTGTCATATTTGGTCCTGATGATACTCCATGGGATGGAGGCACGTTCAAGTTGACTCTCCAGTTTACTGAGGATTATCCAAATAAACCACCAACTGTGCGATTTGTGTCTCGCATGTTTCATCCAAATATTTATGCTGATGGAAGTATTTGTTTGGATATACTACAAAATCAGTGGAGTCCTATA
Gma.3650.1.S1_a_at	BU548987	At1g03220	6e-64	Protein Destination & Storage			GAAGCTCCCAAGTGGGGCCCAACGTGCCGGTCATTGATCTGGTCCTGCAGAGCGAGATGGTGAAGTGGAGCATACACGGAAGAAACTCCATGGTGCAGGTGAACGACGATGTTATGTGCNTAGGGTTTGTTGATGGAGGTGAGAATCCGAGGAACCCTATTGTGATTGGAGGGTATCAATTGGAGGATGTGTTGGTGCAGATTGATTTTGATACTTCCATGGTGGGA
Gma.3650.1.S1_at	BU548987	At1g03220	6e-64	Protein Destination & Storage			TTGGGCTCTGCTTCGAATCCAACGGCGTTGGAAGCTCCCAAGTGGGGCCCAACGTGCCGGTCATTGATCTGGTCCTGCAGAGCGAGATGGTGAAGTGGAGCATACACGGAAGAAACTCCATGGTGCAGGTGAACGACGATGTTATGTGCNTAGGGTTTGTTGATGGAGGTGAGAATCCGAGGAACCCTATTGTGATTGGAGGGTATCAATTGGAGGATGTGTTGGTGCAGATTGATTTTGATACTTCCATGGTGGGATTCAGTCCTTCGCTTCTGACGAAGCATGCTACTTGCTCTCATTTCAAACCCTAGTTTTCNGGTGAATCGTGATGATTATAGTTTATTATTATCCATACCACATAGTTTTTCTTTAGATTAAGAAGAGTTTTGAGGAGTTTAA…
Gma.3950.1.S1_s_at	CD393016	At2g39990	1e-111	Protein Destination & Storage			GTTGACAAAATTCCCTCAGATTTAGAAGGGATGGAAGCATCAATGCAACATCTGCTAGTCTTGATTGATGACATCTACAAATATGTTAACGATGTTGTGGAAGGGCTAGTTGCACCAGACAACAAAATCGGGAGATTTATATCAGATGCTGTAGGTTCCCTTCCCAAATTGTCCCCATCAGTTTTTGATAAGCTTGTGAATGACAGTTTGCAGGATCACTTGCTTTTGCTGTATTTATCTAGTATNACAAGAACGCAGCTTAGCTTGGCTGAAAAATTGAACACAGCTGCTCAGATTCTGTGATTCTTCCGCTTG
Gma.4335.1.S1_at	BU548713	At2g17200	7e-23	Protein Destination & Storage			ACCAGGTCAAACAGGTGGAGGCACTGGACCNNTGAACAACNTGGGGCTGGAGATGTTATCAAGCATGTTTGGTGGACTNGGAGCTGGTAGCCTGGCTGTTCCTAACAGATCAAATGAGCCNCCGGAGCAATTGTATGCCACCCAACTTTCTCAGCTTCANGAGATGGGGTTCTTTGACACGCAAGAGAACATAAGGGCTCTTATTGCTACATCAGGGAANGTNCATGCAGCAGTTGAGCGGCTTTTGGGGAACNCCGGACAGTAGCAGGTGGTANNNNGGGACACAAGACTAGCAATTAAATCCCAAACACTAGAATCTGGTGTGAGATATTTGTCCATTTAGCTTTGATTTTCNTCATGGANTTATGTTCAAACAAATCTATTGATTTTTTTTTCATT…
Gma.4388.1.S1_a_at	AI960115	At1g63770	0	Protein Destination & Storage			TCTCATTGGAGGTTTCTGTGGGTCTCCGGTGAACTTTCATGCAAAGGATGGGTNAGGCTACAAGTTTTTGGGAGAGATTGTGCTGCAACTTGACAAGCTAAATCCTCAGGTNGCCTCGAGAATGGTGTCAGCCTTCTCAAGATGGAGGCGTTATGATGAAGACAGACAAAAGCTTGCAAAGGCGCAGTTGGAGAGGATCATGTCTACTAATGGACTATCGGAGAATGTGTTTGAGATAGCTTCGAAAAGCTTAGCTGCCTAAAAGTGTTAATGGCGTATGAAAAACTGCCATGATGTGTTAGTGGCGA
Gma.5665.1.S1_at	BQ627738	At3g52590	2e-64	Protein Destination & Storage			GAGGTGGAGTCAAGCGACACCATTGACAATGTCAAAGCCAAGATTCAGGACAAAGAAGGGATTCCTCCGGATCAGCAGAGGTTGATCTTCGCCGGNAAACAGCTGGANGATGGCCGTACCCTCGCNGATTANAACATCCAAAAAGAGTCAACATTGCATCTTGTTTTNAGGCTTCGTGGTGGTATTATTGAGCCATCTTTGATGGCACTGGCGAGGAAATATAACCAGGATAAGATGATCTGCCGCAAGTGNTATGCCCGTTTACANCCCCGTGCTGTGAACTGCAGGAAAAAGAAGTGTGGTCACAGCAACCAGTTGAGGCCAAAGAAG
Gma.5591.1.S1_at	BM270542	At1g51980	1e-145	Protein Destination & Storage			AGTTGACCAGGCACAGCTTAATCGAGCCAAACAGGCTACCAAATCTGCAATTTTGATGAATTTGGAATCAAGAATGGTTGTTTCAGAAGATATAGGAAGACAAATTTTGACATATGGTGAGAGGAAACCTGTGGAGGATTTCTTGAAGGCAGTGGATGAAGTAACCTCAAAGGATATCACTTCAATTTCGCAAAAACTCATTTCTTCTCCTCTCACAATGGCATCATATGGAGATGTTCTCTATGTTCCAAGCTATGAATCAGTGAGCCTCAAGTTCCGTTCCTAATGAGATTGTTTCCATCCATCATATTGAGTCTTCTTTGTATACAATCAAGTCTTGTACGGCTGAAAGGTGTAAAATTAAGTTAAACTTCCCTAACTATCCTTGTTGTAGTCAAT…
Gma.5581.1.S1_at	CD392224	At5g40580	1e-133	Protein Destination & Storage			TATCAAGGGCATGTCTCAGCTGCTTTNGTNCTTGGTGGGGTTGATATCACTGGACCTCATTTGCATACTATTTATCCTCATGGGTCAACTGACACCCTCCCATTTGCTACAATGGGATCAGGTTCACTTGCTGCAATGTCTGTATTTGAGTCTAAGTACAAGGAAAGTTTGAGTAGGGATGAAGGCATTAAGCTAGTTGTTGAGGCGATATGNGCTGGNATATTTAATGACCTAGGAAGTGGAAGTAATGTTGATGTTTGTGTGATAACCAAGGGACATAAGGAATATCTCAGGAACCACCTTCTACCAAATCCTCGTACCTATGTCAATCCAAAAGGCTTTGATTTCCCCAAAAAGACAGAGGTCCTCTTAACAAAGATTACACCGTTGAAGGAGAAG…
Gma.5575.1.S1_at	BU549678	At1g75950	6e-56	Protein Destination & Storage	Ubiquitin Degradation	SKP Family	AATGGGCGTTTGAATAAGTTTTATGATTCTGCTGCTTTTGAAATTTCAATGAAAAGATATGCCCTATAGTTTCTAGTTTATGTTTCTGACTATTTTGTTTGTTTTATTTATGTTTCGCGTATCAAACTTGTCTTCTTTTTTGAACTTGGGCAATCTTGAA
Gma.5421.1.S1_at	BI968175	At1g52600	2e-96	Protein Destination & Storage			GAATATGAAGTCAAAACTGCGGTCTAACTTCGGATGGTAGGGTGAGCAGAATATAATGGTAAGATTAAAAGATGAATCTGAAATCATTTTGTACCATTCATAGTATATGGGGGACAATATGATGTTAAGGATTTATGCAAAATAGTTGAATTTTGGTATATTCTTACTTCTTCCTACTCCTTGATGAG
Gma.5368.1.S1_at	BQ627877	At5g05780	1e-75	Protein Destination & Storage			GGAGTTACCTTGACCTTGTTATTGATGGAAAGCTTCCATTAAACCATGAGATCCTGTACCATCTGCAGGATGTGTTTAACCTGCTACCAAATCTTAATGTTGCTGATCTTATCAAGGCNTNNGNAGTGAAAACCAATGATATGATGCTGGTAATATACCTCTCGTCTCTCATTAGAAGTGTAATAGCACTCCACAACTTGATTAACAACAAGATGCTTAACAAGGAACATGAACGGGCAGAAGACTCGAAAACAGTTACAGTGCCAAGTGCAGCTGCATAAGTTTTGAGGGGTTTGTGATGGCCGGAGCTCTAAATGTCNNNNNNNNNNNNGNNNNNNNGNTTATTACACCTTTTNTCTATTTCTGCTAGGAGTAGAGAACTTACACCTAACATGGCAT…
Gma.5393.2.S1_at	AW598129	At4g39220	2e-62	Protein Destination & Storage			GCGTTTGTGATGACCTTTTTTTCCATGTTTGATGTTCCTGTCTTTTGGCCTATATTACTCTGTTACTGGGTTGTTCTCTTTGTCCTTACAATGAGGCGTCAAGTTGCACACATGATGAAATACAAATATATCCCCTTCAACTTGGGGAAGCAGAAGTATAGTGGTAAGAAATCTTCTGCAAGTAGCAGTGGCTCTCGTGCAGACTGAAACTTGGTTCTTATGATTTGAAGATCTACTAAGTTAGGTTTTGTGAACATTCAGGCTAGTTAATTTTCCCCCTTTTTTTAATGAAAGAATTTGTATTCTGGGTATTATGGATGCCAGTATGCAGTTACAGAAAATCTTAATGGTCCACTGTTCATGTTATACACGAATACGTGCTAATATTGGTAGAATTTC…
Gma.448.2.S1_a_at	BM091754	At3g60820	1e-82	Protein Destination & Storage			TATGCTTTCAATGTTTTGGGTGGCCTTGACAATGAAGGAAAGGGATGTGTCTTCACATATGATGCTGTTGGTTCTTATGAGAGGGTTGGATATAGCTCTCAGGGTTCTGGATCCACACTTATTATGCCATTTCTTGATAACCAGNCTGAAGTCTCCTAGCCCACTCCTGTTACCTGCCCAGGATGCTGTTACTCCATTGTCTGAAGCAGAAGCAGTTGATCTGGTCAAAACTGTTTTTGCATCTGCAACTGAGAGAGAT
Gma.4677.1.A1_at	CD406122	At1g68070	5e-41	Protein Destination & Storage			TGCAACCATCATTTCCATTCGTCGTGCATTGTGAAATGGCTGAAGATGAATGCAACTTGTCCTCTCTGCAAGTACAATATTCTCAAGGGAAACGAACAAGTGTGACAGAAAACGAAGAACCTACCAAGTCCCAACTGGGTGTTTCAACAACTGTTGTGNAATATGTATATATAATTTCAAGACAAGAAAGAGTTTACNTCCCTACTCGCTGGGTTTTGATGGTTGTTTCGTTTAGCTGTTTCTGTAGAGAAAAGATATATAGAGCATTTATTGACGAATAAGTTAGCAACTGTAGTCTACTTAGAATTATTTCGNCCTTTGTTAGATTCAGAGATGTCCNATTTGTAGGTTGTTCATTTCTTTTCTGACGGAAACTGGATTGTTTCATTTGCTACTGGT…
Gma.4940.1.S1_at	BI969941	At3g66654	1e-66	Protein Destination & Storage			GATCTTTTCATTACAACTGCACCGATACCAGATTTAAATGAGAAAATTATTGTGTTTGGGCAAGTCATCAAGGGAGAGGATGTTGTGCAGGAAATTGAAGAAGTGGATACAGATGAACATTACAAGCCTAAAGTATCTATCGGGATACTTGATGTGACTCTTAAACAGAAGGTCTGATGTCTGAAGGTTCTCTGCTAGATCAAGATCATAATTAGCTGTGATACTTAGCTGTTAACCTGTTTTGGGGGACACTGGTCAAATCTTTTGTACAGGGATGAACCTTGAGAATTTTGCCTGGGCTGCATCTATCAAGTGTTTGAGCCTTGATGTTGTTTTTGCTATTGCGTTTTTATTTAACACAGGGATTATGCAATCTCCTTTCCTTACATCCTTTTAATT…
Gma.5084.1.S1_at	AW309848	At1g07750	3e-78	Protein Destination & Storage	Storage Protein		GGAAGTGTGCATTAGAGACTCAAGTTGAGGCTGGTCATTTGCTTGTTGTGCCACAATTCTTTGTGGTTGCACAAATTGCTGGGGAAGAAGGAATTGAGAGTTACTCTATCGTGACAACTACAAAGCCTTTATTTGAAGAGTTGGGTGGAAGGGCATCAATTTGGAGCGCCTTGTCACCATCTGTGCAACAAGCATCTCTTCACGTGGATTCAGAATTTCAAAGCCTCTTCATATCCAAGATCAAGGAAACCACAAATCTCATTCCTCCCACTACTAATTAGTCACTTTGTTTATGCATATATTTATGTATTTTCAATGTATGATGTTGAGTGTTTACTTACCCTTGAGTNNCTTTTGGAGAAAAAGTCTGTGTTGCGATCAACCAGAAATGTTAAAATA…
Gma.5122.1.S1_at	CD417588	At2g18040	2e-50	Protein Destination & Storage			GAAGGTTCTAGAAGGAAGGCCTCGTGGAAGGATCCTGAAGGTCGCATCATCAAGAGCACAACCAGAGAAAACGCGGTTTCTCAGCTCAAGGCCCTCCGCGACGACATCGTTTCGGGCAAGGCCTCCTTCGAGGACATCGCCTCTCGCTTCTCCGATTGCAGCTCCGCCAAGCGCGGGGGTGATCTCGGTCCTTTTGGTCGTGGCCAGATGCAGAAGCCTTTTGAAGAAGCAACTTTTGCTCTTAAAGTTGGTGAAATTAGTGACATTGTGGATACTGACAGTGGAGTCCACATTATTAAGAGAACAAAATGAGATTATTACACGGAGTAATCTCCTAATAAGGAGAGACATTAACATCTGTAGAATATTTCCAGGATTCTTGCTCAACTCAAGATCTGT…
Gma.5138.1.A1_at	AW156694	At1g21080	0.0002	Protein Destination & Storage			GAGACCTACTTCAACCAGCAAGGATTGAGTTTGATATCCGGTTTGTAGTTTATTTGATTGTTTGTTGGTTTTTGAGGGGGTGTATTGTATGTATCGCTCGTGTGGAATGTGCCTGTATGTGCTGGAGATCGCATCTTGTCGGCGGGGACCGCATTGTGCAGTGTTGTTTTGCTTGTCTAATAATTCTACGCATAGATGAGGGAATGATAATTTAAGGTAGTGCTATCACTGCCAGCTGGTCGTGATTGGCTGCCATGTATTTTGAATTGTGTATTTTGTTGGGGTGCTTGCACTAAGGTTACTCTTTTTTCGTAAGAGGTAGTGCGATGTCCATTTTAGTAGGGATTCCTGTATAATAACTCAATT
Gma.518.1.S1_at	AW100676	At3g22630	5e-97	Protein Destination & Storage			TCCGCAAGAACCCATACTCTGTGAACATCCTTCTTGCTGGNTATGACAAAGAGACNGGCCCTGAACTNTACTATATTGACTACATTGCAACGCTTCACAAGCTTGAAAAGGGGGCTTTTGGTTATGGCTCCTATTTTTCACTNTCAATGATGGACAGACACTACCATAGTGGAATGTCAGTTGAAGAAGCANTTGATCTCGTTGATAAGTGCATTATGGAGATCAGATCCAGGCTNGTTGTTGCNCCNCCNAACTTTGTTATTAAAATNGTGGACAAGGATGGTGCAAGAGAGTACGCATGGCGTGAATCTGTCAAGGATGTTCCTGTTCCTTCAGCTTGAGTAACTCTGTCCCTAATTTTCATTGGACTTCTTTCTTTTCGATTTGCCCTGCTTTTAT…
Gma.5810.2.S1_a_at	AI965339	At3g26340	2e-94	Protein Destination & Storage			AGGGTGTTATGGTAGCTGCTGATTCTCGAGCTAGCATGGGAGGATATATATCATCGCAGTCTGTGAAGAAGATTATTGAAATTAATCCGTATATGCTTGGGACAATGGCTGGAGGTGCTGCTGATTGTCAGTTTTGGCACAGGAATCTTGGGATCAAGTGTCGTTTGCACGAGTTGGCAAATAAAAGGAGAATTTCAGTGACAGGAGCCTCAAAGCTACTTGCCAATATTTTATACTCT
Gma.5851.1.S1_at	AF456323.1	At2g16600	1e-79	Protein Destination & Storage			TTCATTTGCACGGAGAAGACAGAGTGGCTCGACGGAAAGCATGTCGTGTTCGGACAGGTCATCGAAGGATTGAACGTTGTCAAGGACATCGAGAAGGTCGGATCCAGCTCCGGCAGGACCTCCAAGCCCGTTGTCATCGCCAACTGCGGTCAACTCTCTTAGACGACGTTGACCCGCGGCTTTAATCTCTGAATCTGTGTTATTTCTTTCGGTGTCGTTTTTGCCTTTTTTTTCTCTTCTTTTCTTTCTCGTGTCGTCGTTTAGGGGATTGTGGTGTTAAGGATATCATTTCGAAACCCTTCCCCTTTCCTTTTCAATATCAGTA
Gma.5851.2.S1_at	CA936159	At2g21130	5e-77	Protein Destination & Storage			CGGTGGCTCTGAATGTGTCGTTTCTTTCGGTGTCG
Gma.5851.2.S1_s_at	CA936159	At2g21130	5e-77	Protein Destination & Storage			CTTCATCTGCACGACGAAGACGGAGTGGCTCGACGGAAAGCACGTCGTGTTCGGACAGGTCGTCGAGGGGATGGACGTCGTCAAGGAGATAGAGAAGGTCGGATCCAGCTCCGGCAGGACCGCCAAGCCTGTCGTCGTCGCCGACTGTGGTCAACTCTCTTAGATAGACGACGTTGACCCTAGGCTTTTATCTCTGTGTCGGTGGCT
Gma.5649.2.S1_at	BI785611	At2g47470	1e-137	Protein Destination & Storage			GAAAGTTGCCACAGCATTTAAATTGGAGGAAGATGTAGTAATTGCAAATCTGGATGCTGATAAATATANGGATCTGGCTGAAAAGTANGANGTGAGTGGATTTCCTACCTTGAAGTTCTTCCCAAAGGGCAACAAAGCTGGTGAAGANTACGGAGGTGGAAGAGACTTGGATGACTTTGTGGCTTTTATCAATGAGAAATCTGGANCAAGTCGAGATGGAAAAGGACAACTTACTTCCCAAGCTGGTATAGTAGAAAGCTTGGATGTCTTGGTAAAGGAGTTTGTAGCTGCCAGCGATGAAGAGAAGAAATCCGTGTTTACCCGATTGGAAGAGGAAGTTGTGAAGCTTAAGGGTTCCGCCTCAAGGTACGGGAAGATTTACTTGAAAGCTGCCAAGAA…
Gma.5781.1.S1_s_at	CD415811	At5g42300	2e-28	Protein Destination & Storage			GCGAAGGACTTTAGGTTGGGATTTGGGAATTAGGGTTNTTCGCGTGGCGAAGATGATTGAGGTGGTTTTGAACGATCGATTGGGGAAGAAGGTGCGCGTGAAGTGCAACGACGATGATACCATCGGCGACCTGAAGAAGCTTGTGGCGGCTCAGACTGGCACAAGAGCCGACAAGATCCGCATCCAGAAGTGGTACACCATCTANNANGNNNNCANNTCACTCTCAAGGATTACGAGATCCATGACGGCATGGGTCTCGAACTCTACTACAACTAAACACAACAAGGTGTGTTTTATGCGTAATATACTATGTGCTGGGAATGGGATAAGCGCTAAATGTAATTCTGACTTGCGAAAGTTCCCATGATTTGAAATAATGTAC
Gma.5781.2.S1_s_at	BG508891	At5g42300	2e-36	Protein Destination & Storage			ATATTACTATGATCTGGGAATGGGATGAGGCGCCAAATGTAATTTTGACTTGCGAAAGTCCCTATGATTTGAATAATGTACATCCCCGAATGATATTGGGTATTACATACCGATGACACCCTAAGTTGCTTTGTTATATATAACCTATCTGATGACTTGTTGCTAAGCTTCATTAATCTGATCGGTGGAAGTGTTTGA
Gma.5782.1.S1_at	CA852398	At2g21160	5e-56	Protein Destination & Storage			GGTTGTTGAATCTGGTGCTTTTCTTAGCATGGAATCCGTTTTTCTTGTTACTCTTGGGGTTGCACTCCTTGTCCTCCTGGGGCTATGGATTCATGGCCAAATACAGTACCTATCTAAGAAAACAAAGAGGGCTCCAAAAGTTGAAGTTGGGACTAAGACTACTGATGCTTCAACAGATGAATGGCTACAGGGAACTGCTTATACTCAGTCTCTGTCAAGCAAGTCAAAGAAGAAGAAGTAGATAAACAATTTCTCACGTTCAGCCACTCACNAGACTCTACCATGGATATGGAATACAGAATCCTGTAACTGACTAGGGTTGAGTATGAGAGAACACGAGGAAGTAGTTGTGAAATTTTGGCTGAAAGATCCAGCTTTCTGTTGTAGCTTAAGAATTTT…
Gma.5794.1.S1_a_at	CD400361	At5g56500	7e-85	Protein Destination & Storage			AAGTTGGAGCTGATATTGTGAAAAGAGCTCTTAGTTACCCTTTGAAATTAATTGCCAAAAACGCTGGTGTCAATGGTAGTGTTGTCAGTGAGAAGGTATTGTCCAGCGACAATCCAAGATATGGATATAATGCTGCCACCGGAAAATATGAAGATTTGATGTCTGCTGGGATCATTGATCCAACAAAGGTGGTCAGATGTTGCCTGGAACATGCAGCCTCTGTAGCCAAAACCTTCTTAATGTCAGATTGTGTGGTTGTCGAGATAAAGGAACCTGAGCCTGTACCTGCTGGAAACCCCATGGACAATTCAGGATATGGTATCTAGAGCAACGGCTGCTTCAGTGAGAAGA
Gma.6321.1.S1_at	CD417415	At5g48570	1e-82	Protein Destination & Storage			GAAAAAGCAGGCCAAGACCTTGAAGGTTGCCTGCAATCTGAACAATGCTGCTTGCAAGTTGAAGTTAAAAGACTACAAAGAAGCAGAGAAATTGTGTACTAAGGTGTTGGACCTTGAGAGTACAAATGTGAAAGCCCTCTATAGAAGGGCCCAAGCACATATGCAGTTGACTAACTTGGATTTGGCTGAACTTGACATTAAGAAAGCTCTTGACATTGACCCTAACAACAGGGATGTCAAATTGGAGTACAGGACTTTGAAGGAAAAGGTGAAAGAGAATAATAGAAAGGAGGCGCAATTTTATGGAAATATGATCAACAAGATGACAAAGATTGGTTCCTGATAGCAATAAACCAGCTACGAAGTACCAACGGTATTGAATCCGGGGTTGACAACTAA…
Gma.6228.1.S1_at	BF595226	At1g53750	1e-168	Protein Destination & Storage			GACCTGGACGATTGGACCGTAAAGTTGAATTTGGCCTTCCTGATTTAGAGAGTANGACTCAGATATTCAAGATACACACAAGAACCATGAACTGTGAAAGGGATATCCGCTTTGAACTTTTAGCTCGGCTTTGCCCAAATTCTACCGGAGCCGATATAAGGAGCGTTTGCACTGAAGCTGGTATGTATGCTATTCGAGCCAGAAGGAAGACCGTGACAGAGAAAGACTTCCTTGACGCAGTTAATAAAGTCATCAAAGGATACCAGAAGTTCAGTGCAACTCCCAAGTATATGGTTTATAACTGAGTAATTCTTTCCTCTATTTCCCAGAAACTATATTAGCGGTTACCAGTGAAAATTTAAGGGCGCATGTTTCTTTCAATTAGCAGTTTCTGAAATT…
Gma.6056.1.S1_at	BQ453230	At1g14980	2e-40	Protein Destination & Storage			TCCCTTCCGTTTCGTGGCGTGTGTTCCAAATGGCGAAGCGTTTGATTCCACTGTTCAATCGGGTTTTGGTGGAGAAAATCGTGCCTCCATCAAAGACCAACGCTGGCATTTTGTTACCCGAGAAATCCTCCAAGCTAAATTCNGGAAAAGTTATTGCTGTTGGCCCTGGCTTTCACAGTAAGGATGGGAAGCTAATTCCTGTGGCTGTTAAGGAAGGTGATACTGTTCTTTTGCCTGAATATGGGGGAACTGAGGTGAAGCTTGATAACAAAGAGTATCATCTGTTTAGAGACGATGATATTCTGGGGACATTGCATGATTGATGTCAAAATGATCCGCGGAAATTTACATGCTAGGTGTTCTGCTACATT
Gma.6014.1.S1_at	BE821831	At3g14290	1e-116	Protein Destination & Storage			TTCAGGGTCAGAAGGTGCCGACAGTTCTCTGCAAGAACAATACAANAAGGACCTAACTCTTCAAGAAGCTGAGACTATTGCTTTATCCATTTTGAAGCAAGTTATGGAAGAGAAGGTCACTCCCAACAANGTNGACATTGCCAANGTGGCTCCAACATATCATCTTTATACCCCNTCTGAGGTGGAAGCTGTGATAAGTCGTCTATGATTTTCTTTTNGTGACTTTCTNTATTCAACATTTGTGTTTCCTATCATTCCT
Gma.6468.1.S1_at	BU761589	At2g32920	8e-08	Protein Destination & Storage			TATGCTCCTCTCAAGAGTGCTTTTGAACTTGACCAGATTATAGAATTTGTGAAAGAAGCNTGGNCGTGGAGGCAAAGGGAATTTGCCCCTGCAAGGCACTCCAACCATTGTAAAGACAGAACCNATGGGATGGAAAAGATGGAGAAATAATTGAGGAGGATGAATTTTCTCTTGAAGAACTAATGGGGGAAGATGCTTCAAGCAAGGATGAGCTATGATCAATTTATAAGGAATTTATACCAAATTAAAGTTTCAACCACCGATTTTTACGTTACAGGCAACTTGTTTCTCATGATTATTGTGATCACTATTCTGTTTTTCCATGTTCCAAGTTAAAAAACCAGTCTAGTGATGAGTGATCTTCTCTGAGGATTTTGATATATGTCATTCAGTGGGTAC…
Gma.6411.1.S1_at	CD407435	At1g71950	1e-31	Protein Destination & Storage			GAGCCTGAGGCCTACCACATCAGAACCCTCACTTCAGTCCTTGGCAGTGAGGAGGCTGCAAAGGAAGCTTTGTTGTATAGTTACAAGTCTGCAGCCAGTGGGTTCTCAGCTAAGCTTACTCCGGAGCAGGTTGAACAGATTTCAAAGCTACCAGGTGTTCTTCAAGTTGTTCCTAGCAGGACATATCAGCTCCATGGACCAAATAACCTGCAGTAGAGAATGTTCACCTAAAGTTGTATCGGTTAAACCGTTATCTATGCCATGTATAAACTAAACTAGTGTGGCTCTAGACTTGTGCCAATAAGAACATGGAATTAATATATAATAATACATTACTAATATTTGTGCTATATGTTTATCAATGTGTCATGTATTCAAAGTGGCANNNANNGACCCTGT…
Gma.6391.1.S1_at	CD403463	At2g04160	5e-38	Protein Destination & Storage			AATGTTGGGCCACCAAGCACATACACTGTAAGTACCCGCTCGCCAAATGGATATAGCATTGCCGTTGTGCCACCTTCCTTGACTTTCACGAAAATTGGTGAAAGGAAGACATTCAAAGTCATTGTGCAAGCAAGCAGTGCAGCTACGCGGAGAAAGTATGAATTCGGGGATTTGCGTTGGACAGACGGAAAGCATATAGTAAGGAGTCCTATTACAGTTAAGCGCAGATGAAAATTCCCAAATTGGTCGAGTTGGTTGTGTTGTATTGTGTGGATGCGTGTGTGCATGTTTAGATATAAGGTAGTTGGACTCTATATAGCTAGGATTTTCATGNTTATGACATAACTGTGTTGTTCCTTGGTTCCTANNNNNNNNNTTGGTTATCAGTATCACTGTATA…
Gma.6692.1.S1_at	AW309658	At5g26360	1e-162	Protein Destination & Storage			ATCCGGACTATGACTGCTCTACAAGGAAAACATGCAAATGGAGAAAATGCNTGGATTGGTATAGATGGAAATACTGGNAGTATCACTGACATGAAAGAGNGCAAGATCTGGGATGCCTACAATGTGAAGGCACAAGCATTTAAGACTGCCATTGAAGCTGCTTGCATGCTTCTGAGGATTGATGATATAGTGAGTGGGATCAAGAAGAAACAGGCCCCTGGAGCCACTCCTTCAAAACCCAAGGTTGAGACCGAGGCAGATGCTGACAGTGAGCAAATCCTTCCCGATTGAGAATCTNGNTTCAACNGACATTGTTTTTTGGTAGAGTTGATGATGTGNNAGGTTCTTNATCTTCCTTAAATNTTATCACTATTCTTAGNAGTTNNGANTCCTTTATTG…
Gma.6719.1.S1_a_at	CD395628	At3g25230	1e-46	Protein Destination & Storage			AAATTGTGCACAAAGGTACTGGACCTTGAGAGTACTAACGTGAAGGCTCTTTATAGACGGACCCAGGCATATATCCAGTTGGCTGATTTAGATTTGGCTGAATTTGATATTAAGAAAGCTCTTGAGCTTGAACCTAACAACAGGGATGTCAAGCTTGAGTACGTGACTCTGAAGGAAAAGATGAAGGAGTACAACAAGAAAGAGGCAAAATTTTATGGAAATATGTTCAACAAACTGCACAAGCTAGATTCTCTTGACA
Gma.6633.2.S1_at	BE020127	At1g50490	4e-42	Protein Destination & Storage			AGAACACTGAATCTGCTCAATCCAACATTGCTCCTCCCGCTAAGCAGCCTCTACATCCTGCTAAGGCTGTTGATTCTCAATCTGTACTCAAAAGGCTGCAATCTGAATTGATGGCTTTGATGATGAGTGGAGATTCTGGGATATCTGCGTTTCCTGAGGAGGACAACATATTCTTCTGGAAGGGAACAATAACAGGAAGCAAAGATACTGTGTTTGAAGGCACAGAGTATAAGCTATCACTCTCCTTTCCCAATGACTACCCTTTCAAGC
Gma.7443.1.S1_x_at	AW100678	At4g30890	3e-79	Protein Destination & Storage			AGCTGATGCCCAATATCCCAATGGTCGNTGGCTACGATTTGATGACCAATCTGTCTTTGCTATTGGAACAAATAAGGTGCTGCATGATCAGGCATATGTNCTTTTCTACAGACAGATNTGAACATATANATATTGTTCTNTCAAATATCTACTCCCTNNNNNNNNNNACAGAAAAAACACTACTCCCCTATAAGAAAGGATTNCNGGTCGATTAATGTCNTGCATGGAGAGAAAATGTGGGTGATTATTTATTAGCTGGTGAGGGTACCATAAATGGTCGATCCAATCCAGTGTGTGAAAAAGTAATTGTTGTAATATTCTTTTTGATATTGTCTTAAACTGAAAGTTTTGTAGTCTTAGTGTAGGACATGGGTATGTATTTATGGTAACAGTGAGTAA…
Gma.7303.1.S1_at	BQ612122	At4g08980	2e-10	Protein Destination & Storage			GGCCTTTGGTTCTTGACACTTATGAGAGTGATGGCTGGGATGATTTCTCAGATGTGTCTGATTCATCAGAGTACTTGGCCTGGGACTTTGTGGCTGGTGGCATGGGAGAATACTATGNTGATGATAGTGATAGTTACGATGGAATGTGGGATGATGAAGCGAGGCTAGATGAGCTTCAGTTCGGGTTTTATGAAGGGATAGAAGATGCAGGAATGTATTGGCCTCCATCTCCATAAGAAGCTATAGCTGCTGCATTACTTGTGATCAATTGTATGCTTTTCTACTCTTGTAACTAATGCTTCTACTTTTCTTTTATGTGCTCTNTGAATGATGTGTTTTTTTTTTCCTTCAAGTAATGTTTGGCTTGCTCTGCCTAGCATATGCATAATCGAGTGAGAT…
Gma.7226.4.S1_a_at	AW202090	At2g30870	3e-48	Protein Destination & Storage			TTCTTTTGTGACTGTTTTCTCGGGTTCATCATGTATTTTACTTANNNNNNNNNNNNNNNNNNNNAAAAAAAAAAAAAAANATNGNNNNNAAGNNNNNNGGTCCAACCTATGGATCCCCCAAGAGGGTCCTGGTGTGTCTGATTGAGAAGGAAATTGAGTTTGAAACAGTGCATGTTGATCTCTTCAAGGGAGAGAATAAGGAACCTGAGTTCCTTAAGCTGCAGCCATTTGGATCCCTTCCTGTTATTCAAGACGGTGATTATACTCTCTATGAATCTCGTGCAATAATCAGATACTTAGCTGAGAAGTATAAAGACCAAGGGACTGACTTATTGGGAAAGACAATAGAAGAAAAGGGTCTAGTGGAACAATGGCTTGAAGTGGAAGCTCATAACTTTC…
Gma.7176.1.A1_at	CD407127	At3g19170	5e-64	Protein Destination & Storage			GATGTAGATGCGTATCAACTTCCTGATGCCAAAGGTTATAGTAGTATGTTGCGGTACTTACTGGGTATCACAGAGGAAGAAAGGCAAAGGAGACGTGAAGAGATATTATCTACTAGTTTGAAGGACTTCAAAATTTTTATGGATGCTATGGAAGCAGTTAAGGATAAAGGGGTTGTGGTTGCAGTGGCATCTCCAGAGGATGTAGATACGGCCAACAAGGACCGTCCCGACTTCTTTCAAGTGAAGAAAGCCCTTTAGTTTCAGTATCTATTCCCCGCATGGATTTGAAATTGTATCTTTTCTTAAAATTTCATACATCGAAACNAATGTTTCCTTGATTATTTGTTTAAATAGGTTAACTGGCTGGAGCTAGATACGAGAATTTA
Gma.6975.1.S1_at	AW349256	At1g71980	1e-27	Protein Destination & Storage			TGGCCATGTGATGACCGGTGGTCTAGTTGAATAGTCCTATGTGATGCTNGGGGCATTCCCTACCTCTGTCATTTGACTTCCGTCTTGGCACCTGGTGTACATTGTAGCTTCTCTCTGGTGTTAGTTTCGTTTACATGTGCTGGTTGAGGTTCTTACATTTATAGGTTGGAGAGCTTGCATACAGTAACTTGTGCGTATTGTTTGTACTTTGAATGTTGACGTTTTCATGGCCTTGATGTCCAAGTATAGTCAACTGCTAACAAGAGAAATGTTGGGCTGTATTGACACTAGACACATTGAAGTAAGAAGAGTTCTTTATGCTCTGTCTAGTGGATTTGTCCAACTGAATCATGAGAGATCATGTGATGTATCACTCTAGTGTTATCTATACTTGATCAT…
Gma.6975.2.S1_a_at	BU546346	At1g71980	3e-22	Protein Destination & Storage			CATTTGCATCGACACACTCCCTTCCGGAATGTTAAATTGTTCAATTGATTATATCATATGATTGAGACACGTCCATGCAGTTGAACCAGTAATTGCCAAGTCTTGAACTAAAAGGTGACCATGGATGACTGGTCGATATTTGGGCGTAGCATTTCCTCCTTTGTCTCCTCTGGCATTTGACTTCCTTCTTGGCACCTGGTGTACATTGTAGCTTCTCTGTGGTGTTAGTTTCATTTTTACATGTGCTGGTTGGCGAGCTTGCATACAGTCACTAGTGTGTATTGTTTGTACTTTGGATATTGATGTTTTCATGGCCTTGATGTCAAAGTATAGTCAACTGCTAACAAGAGAAATGTTGGGCT
Gma.8037.1.S1_at	CD405725	At3g11830	2e-35	Protein Destination & Storage			GCATGCTTGTGTCTTCTACTTGGTGTTGCTGGAAGCATGCCGATTTTTGGACCTACAAATCATGAAATGAAAATGTAATGGAGATTCTGGGAACATCATCTGATCAACCTAGGATAGCAATTTTCAAGCATTGTCTTTCTGACGATCGTTTCGACTTGAGCTTCGTG
Gma.8018.1.S1_at	CD409445	At5g64350	1e-52	Protein Destination & Storage			TCAGAAATTCTGGAGCACAAAGGATCCTGGCCAGAACCCATTCACTTTCAAAATCGGCCAAGGTTCTGTTATCAAAGGATGGGATGAAGGTGTGCTTGGCATGCAAATTGGTGAAGTTGCTCGTCTCCGGTGCTCTCCGGATTATGCTTATGGTGCTGGTGGCTTTCCTNCTTGGGGNATACNGCCCAACTCTGTCTTGGAATTTGAAATCGAAGTCTTNAGTGCNCAATGAAAACCTTGGTAGTCTGTCTCTGTCCTAA
Gma.8018.1.S1_s_at	CD409445	At5g64350	1e-52	Protein Destination & Storage			GAAGCAGTTGTTGAGGTCTGGCACCGGTCCGAAGCCAATTCCCGGTCAGAACGTAACCGTTCACTGCACTGGTTTCGGGAAGAACGGTGACCTTTCTCAGAAATTCTGGAGCACAAAGGATCCTGGCCAGAACCCATTCACTTTCAAAATCGGCCAAGGTTCTGTTATCAAAGGATGGGATGAAGGTGTGCTTGGCATGCAAATTGGTGAAGT
Gma.8301.3.S1_x_at	BI321023	At1g23260	6e-67	Protein Destination & Storage			CGGTCCCCCTAGTACTGTTCATGAAGGGCGTATCTACCAGTTGAAATTGTTTTGCAGCAGGGATTATCCAGACAATCCTCCATCTGTTAGATTTCAAACAAGGATTAACATGACATGTGTCAATCAAGAAACTGGAGTGGTTGAGCCACATTTGTTTCCTATGCTTGCTAATTGGAAACGTGAGCGTACAATGGAAGACATTTTGATTCAATTGAAGAGAGAAATGATGTCTCCCCAAAATAGGAAGCTAACTCAGCCTCCTGAAGGCAATGAAGAATCCAGGGTTGATCAAAAGGGGTTGGTGGTGAGATGTTGTATTGTGTAATTCCGTGGAGAATCCAAGAATAATAATAATGTAAATAACTATATTCAATAGACCACTTCCTCCCTGGAGCAATC…
Gma.827.1.S1_a_at	AW310266	At2g36060	4e-16	Protein Destination & Storage			GAGGTTTACCATGGAAGATATACTGACCCAGCTGAAGAAGGAAATGGCGGCTTCACATAACCGCAAGCTTGTCCAACCTCCTGAAG
Gma.827.2.S1_x_at	BQ742526	At2g36060	7e-63	Protein Destination & Storage			GGTTTACCATGGAAGATATACTGACCCAGCTGAAGAAGGAAATGGCGGCTTCACATAACCGCAAGCTTGTCCAACCTCCTGAAGGTACTCACTATTAGTGTCCAAGATCANACNGATATTGGATCATATTGCATTTGCAGTATGCAATATATAGTATGT
Gma.8154.1.S1_at	AW310537	At2g33430	3e-62	Protein Destination & Storage			CCTAGCCAAGGTTCTCGGCAGTGAGGAGGAAGCTAAGAAGAAGATTTACAATGTTTCCTGTGAGAGGTACTTTGGATTCGGCTGCGAGATTGATGAAGAAACT
Gma.8154.1.S1_s_at	AW310537	At2g33430	3e-62	Protein Destination & Storage			GTCCGGCGCAGAGAAAACATGCAGTGAAGGACCAATTTGAGATAGGGAGAGGGATGTGATGTACATACACTATGGAAGTACTTTGTTACATGCACTATTTTAGTCTTGCCTTTGGAGACATTCCATATATTTCCGGTGGGGTAACTCAAATGTTTGTTGTCAAACTTCTATGGCTGT
Gma.7789.2.S1_s_at	BG653902	At4g05320	0	Protein Destination & Storage			GTTTGAGAATGGTCTGCAGGTCCCTTGTTTGGTGTGAACTGAAGTATGTGAAAGTCTATAATCTGGTCTTTTCTTTTTNTATGTTCCTGAACTTTGTGTNTGTGTGCATCCCGGGTCCATTAGCGGACCTTGAAAAGCTATGAATGTGNACAATTTGCAATCATGTTTTAATGA
Gma.8591.1.A1_s_at	AI960591	At1g75760	6e-25	Protein Destination & Storage			TCTACTGACTGCATTGGGTTATGGATTGTGGCCTTTTATGGTTCTTCTATCAGAAATTGTGCAAACTTTCATTCTGGCAGATTTTTGCTACTACTACGTCAAGAGTCTTGTTGGGGGACAACTTGTTCTTCGACTTCCTT
Gma.9182.1.S1_at	CA819955	At3g57870	3e-81	Protein Destination & Storage			ATAGTATGTTAGTTGTTGTCAGTTATTTCTTGTTCTGTGTTAAAACTGTTATGTGATTGTTGGCTGCCATAATATGCAGACTCCATGGTTTTAACAATTTCTGCTTACTCTCAGGTCTGGATAACGTGTTAA
Gma.9885.1.S1_s_at	BG508491	At3g10410	6e-05	Protein Destination & Storage			GAAGTGGATTAATGGAACCCTTGCTGAACCTAGGGATGATAAGGAAAAATTGGTTGCTGAGATGTGATCTCTTTTATTGCTTATTTAATTAGTCTAGCAAAAGGGAACATAAATGAGAAAAGAAATTGCAGAAGTGTGACCTGTATGTAGTTTGTGTGATATGATACCACCCC
Gma.9998.1.S1_s_at	CD414830	At3g51800	1e-07	Protein Destination & Storage			ATTTTTCACCAAGTTGTATCTGCTTGATTGTGAATTTAGTACAGCCTTCGGACACCCAATGTTAATAGGAATTTGATTTCCTTGGCTATTGTACTTGACCTGAATGCTGTACTCCTGATTAAGCATAAAT
GmaAffx.10026.1.S1_at	BQ628569	At5g43010	3e-20	Protein Destination & Storage			CAATTCGGGCAGAGCGTGATTATGTGATCCATGAAGATTTTATGAAGGCTGTTAGGAAACTGAACGAGGCAAAGAAACTTGAATCCAGTGCACACTACAGTGCTGATTTTGGTAAAGACTAGAATCTATTGCAAAATTCTTGCAGAGCCATGGATATCTAGGCAGTGCATCTTGAGTTGGAAATACCTCAGGCAAGTTACTCAATTCGTAGGGCTAAGCGTGATGTTCCCTTTGGGTTGTTNNGGCTTGTGTTTTCCGAATTCTAAANTTGGAAGNNNGGTAACTTNATCAAACGGNTNAAANNGATGTTCAANTNAATTGTATTATNNTTGCCCCCACCCCANCCAACCCAAACCCCTTTTTTTTNCTGGATTGTAGAAGTGCGACTCATTTTATACT…
GmaAffx.39226.1.S1_at	AW350233	At2g30110	2e-74	Protein Destination & Storage			GGACTACCGAAACACATTTGCCAACTTAGCACTGCCTCTCTTTTCCATNGCAGAGCCAGTTCCACCAAAGGTCATCAAGCATCANNANNNGNNNNGGACAGTTTGGGACAGATGGATTCTAAAAGACAATCCTACTCTTAGGGAGCTTCTTGAGTGGCTGAAGGCAAAAGGTTTGAATGCTTATAGTATTTCATGTGGAAGTTGTCTGCTCTATAATAGCATGTTCCCTAGGCACAGAGAACGCATGGACAAAAAAATGGTGGATTTNGCTAGGGAAGTGGCCAAGGTGGAAATACCTTCTTACCGTCGTCACNTNGATGTTGTTGTTGCCTGTGAGGATGATGAGGATAATGACATTGACATCCCCCAAATATCCATCTATTTCCGTTAAGGTGGTTG…
GmaAffx.41840.1.A1_s_at	CD399255	At5g59810	3e-07	Protein Destination & Storage			CAATTGGTGCCCGTCGTGGGTTATTTGGGAATTTGTCTTGGACAGATGGCAAGCACAGAGTAACCAGTCCTATCACAATTCTTCCTTAGAAATTACTCTCGATCAGCATTCTTATGTTATCATTGTCGTCTTTTGAGTGTGTTTGCATTTGCTGTTTTTTAGGCTGTAATATGAGCGTGTTTCCTACTCCTATTGCATTAAG
GmaAffx.40840.2.S1_at	BG509258	At2g47110	8e-30	Protein Destination & Storage			AAGGCCGATGCTTAAATTCGTTGGAAGTGAATTCTCTGTGGTTCTATTTTAATTTTAGTTATTTAAAAGTTTTGGTTNATGTTTTTGTTCAATTAGTGTTATGACTGTTTGGGCTTTGATTAAACCTTTATGAATACTGTTTCGCTTTGGATTACTTATTATTTTTCG
GmaAffx.32805.1.S1_at	BM731249	At1g67680	7e-10	Protein Destination & Storage			AGAGGGTCTCAAGGTGCTGTAGTTAGAGATAAGCATGATACTGGTGCCTCATCTAACAGTTCAAATCTAAAATCAAACCAGGGAACCTCCAAAGGAGCTGCGCAGAATGCAGTTTCCGAGCAAACCAAGCCTTCATCCAAGTCAAGAAAGAAATCGAGGAATTAAATAGGATCATGGTTTTTGATGAACTTTTTTATTTGACAATTTGTTAATGCTGTTTTCAATGACTAAGATGAGGGTCCATACATACACTGTGGTCTGTGGGTTCTAATTCAAAACCGTCAGTTTTGGTTCAAGGAATGAGTATATCTGTTAGATGCAANNATCAATGTGCAAGTTTGTCGTGCGTAGTTTGTTTGAGTTTATGGGAATCATTGAAATATCACCTTTCTGTTGCTG…
GmaAffx.26791.1.S1_at	BE820779	At5g46170	4e-99	Protein Destination & Storage			TGGAAGCAGCTTGGTCGCTGGAATCNTGCTCTTTCCNGCTTCTGAAACTNTGGCCCACATTTGAGTAGTTACTAAANGGAGCTGCAAATCATTCACCAATCATGCTTGAACTGANAACTGAATGCATCTGCTGGNTTTTTTTAATTTGAGGCAATGCTTGTAAGAGTGCACNCCCTGCAACTAGGAATGATCATGTAAGAGCTTTAAGTTTGTAGTCATCTGNCCNTATNAGNTCNCNCTGTGAATATTCTAGGTATCAGTTTGGTTTGCCTTTNTGATATATTTTTCTCAAGTTAAATGAGCAATGTACTTTGCTTCTGTAA
GmaAffx.17961.1.A1_at	BE657601	At1g16030	7e-10	Protein Destination & Storage			ACAAGTTTAATGTTGAGTTGAGTCCGAAGCAATGTAAAATAGTTCCAGCTTCGTTACTCAATCTAGCAGTNTGAGTGTTATGACTGGTTTATGCTTATGCCTAAAATCAGTAAAATGTGAAAGTGCCTAGTATGGATGCAAGGAATGTT
GmaAffx.22482.1.S1_at	AW185059	At3g46460	1e-46	Protein Destination & Storage			TTTCAATGCTATTATGAGTTTCCCATCCAATTACCCAAATAGTCCACCTTCAGTNAAGTTCACNTCAGAGATATGGCANCCCAATGTATATCCNGATGGCCGGGTTTGCATATCAATTCTTCATCCTCCTGGTGAGGATCC
GmaAffx.22482.1.S1_x_at	AW185059	At3g46460	1e-46	Protein Destination & Storage			TCTCCTTCAAAAGCAGCTCAAAGATCTTTGCAAAAACCCCGTCGACGGCTTCTCTGCCGGTTTGGTCGATGAAACCAACATTTTNGAATGGAGTGTCACCATAATTGGNCCGCCCGATACTCTNTACGAGGGGGGATTTTTCAATGCTATTATGAGTTTCCCATCCAATTACCCAAATAGTCCACCTTCAGTNAAGTTCACNTCAGAGATATGGCANCCCAATGTATATCCNGATGGCCGGGTTTGCATATCAATTCTTCATCCTCCTGGTGAGGATCC
GmaAffx.92496.1.S1_s_at	CF808221	At1g78870	1e-84	Protein Destination & Storage			TGTGATGATCCTTGGCCCAACTCAGTCGCCTTATGAAGGGGGAGTTTTCAAGTTGGAATTATTTTTGCCAGAAGAATATCCAATGGCTGCTCCAAAGGTTAGGTTTCTGACAAAAATATATCATCCAAACATTGATAAGCTTGGCAGGATATGTCTTGACATTCTGAAAGATAAGTGGAGTCCTGCCCTTCAGATTCGCACTGTACTTTTGAGTATTCAAGCTCTTCTAAGTGCACCAAACCCAGATGATCCGCTTTCTGAGAACATTGCCAAGCATTGGAAATCTAATGAGGCCGAGGCAGTTGAAACGGCCAAGGAATGGACCCGGTTATATGCTAGCGGCGCTTGATGCTTTGGTGGAAACTTTTGGCTTCAAAAACTATAGTGGTGGGAGTGTAT…
GmaAffx.93136.1.S1_x_at	CF808861	At2g47110	7e-66	Protein Destination & Storage			CGATCACGTTGGAGGTGGAGTCTTCGGACACCATCGACAACGTGAAGGCCAAGATCCAGGACAAGGAAGGCATCCCTCCGGACCAGCAGCGCCTCATCTTCGCCGGGAAGCAGCTGGAGGACGGCCGCACCCTCGCCGACTACAACATCCAGAAGGAGTCCACGCTTCACCTCGTCCTCCGCCTCCGTGGCGGCGCCAAGAAGCGCAAGAAGAAGACCTACACCAAGCCCAAGAAGATCAAGCACAAGCACAAGAAGGTCAAGCTCGGCATTCTTCAGTTCTACAAGGTCGACGATTCTGGAAAAGTCCAGAGGCTCCGCAAGGAGTGCCCCAACGCCGAGTGCGGCGCCGGCACCTTCATGGCCAA
GmaAffx.93316.1.S1_at	CF808110	At2g02760	3e-82	Protein Destination & Storage			GAAGGCATGAATTTGGTTGCAGTGATGGCAACTATAAGAATGATTGTGCAAACTCATCACATTTATATTCTCTGCTGATATGAA
GmaAffx.93644.1.S1_x_at	CF806647	At5g20620	1e-165	Protein Destination & Storage			CTCACCGGCAAGACTATTACCCTAGAAGTCGAAAGCTCCGACACCATCGACAACGTCAAGGCTAAGATTCAGGACAAGGAGGGAATCCCCCCAGACCAGCAGAGGCTGATCTTCGCCGGGAAGCAGCTCGAGGACGGACGCACCCTTGCTGACTACAACATCCAGAAGGAGTCAACTCTCCACTTGGTGTTGCGTCTTCGTGGTGGTATGCAGATTTTCGTGAAGACNCTTACGGGTAAGACTATTACCCTCGAGGTGGAGAGCTCTGACACCATTGACAATGTGAAGGCCAAGATTCAGGACAAGGAAGGCATCCCACCGGACCAGCAGAGGCTGATTTTTGCTGGCAAGCAGCTCGAGGATGGAAGGACCCTCGCTGAC
GmaAffx.93468.1.S1_s_at	CF809193	At4g20850	2e-30	Protein Destination & Storage			ATCTACGGATGGTCGCAGTCAAGGAGATTTGTTTGAAGAGAATTTTAAAGAACTGAAGAAATGGGTTAATGTGAAGTCAACTAAATATGGGATCCTTTTAGTAACTCGTGAGAGGCGAGCTCAAAGGCTTGGGACTGCGTTGAAGGTACTGTGTGACATAATTCAAGATGACGCAGAGCCTGCCAAGAAGAAATTCTATGACCTTAAGCTCTCTTTGCTTGATGAGATTGGATGGACACATTTGGCTGCATATGAGAGACAATGGATGCATGTGCGTTTCCCTCCAAGCTTACCTCTTTTCTAGGACCTGCCCATCGGGAAGATGCTGGACAGCAATGTTAGGACTTTGGAACCGTGTCCTTTTCCTCAATATTTATGTAACACTAGACCCTTTACGTG…
GmaAffx.92634.1.A1_at	CF809148	At1g63800	1e-79	Protein Destination & Storage			TCATCTCACCACATGTGAACTTATCATGGATAAGGGGGGAAATTCCCCTTCCTTCTAGTTTCCCAGTCGCTGTAAA
GmaAffx.92634.1.A1_x_at	CF809148	At1g63800	1e-79	Protein Destination & Storage			AGAGTTGAGTTACCGGATGCTTATCCTTACAAATCTCCTTCCATTGGCTTTATCAACAAGATCTATCACCCAAATGTTGATGAGATGTCAGGATCAGTTTGTCTGGATGTTATCAATCAAACCTGGAGTCCCATGTTTGATCTTGTTAATGTGTTTGAGGTGTTTCTACCTCAACTTNTGCTGTATCCCAATCCATCAGACCCCTTGAATGGAGAAGCTGCAGCTTTAATGATGCGTGATCGACCAAGTTATGAACAAAGGGTTAAAGAGTACTGTGAAAAGTATGCTAAACCTGAAGACATAGGGGAAGCCACAGAAGAGAAATCCAGCGATGAGGAGATGAGTGAAGATGAATATGACTCTAGTGATGAACAGGTTGTTGGTAAAGCAGACCCCTAG…
GmaAffx.92455.1.S1_s_at	CF808180	At5g42790	3e-81	Protein Destination & Storage			GTTGGACTCCTGGTAGCTGGATTAGATGAATCAGGAGCTCACCTCTATTACAACTGTCCCAGTGGAAACTATTTTGAATATCAGGCTTTTGCTATTGGGTCTCGCTCTCAAGCTGCTAAGACATATTTGGAACGCAGGTTTGAGAATTTCGTGGGTTCTTCGAGAGAAGATCTGATCAAAGATGCACTTATTGCAACTAGGGAGTCCTTGCAAGGTGAAAAACTCAGGAGTTCTGTGTGCACAATTGCTGTGGTTGGAGTTGGTGAGCCTTTCCACATTTTGGATCCAGAAACTGTTCAACAGTTGATTGATACTTTGGAAATTGGTGAGGGAGGAAGAAGCCGCTCCAGCCGAAGAAGAAGCTCAGCCAGCAGCCGAACAGGATGCTCCCGCAGATCA…
GmaAffx.92027.1.S1_s_at	CF806741	At3g44110	7e-76	Protein Destination & Storage			CAAGGGCGGTGATCCCGAGAAGTTTAAAGAGCTGGCGCAAGCTTATGAGGTTCTGAGTGACCCTGAGAAGCGTGAGATATATGATCAGTATGGTGAAGATGCGCTTAAGGAAGGAATGGGTGGTGGCGGTGGCCATGATCCATTTGATATCTTTTCATCTTTCTTTGGCGGTGGGAGTCCCTTTGGATCAGGTGGAAGTAGTCGAGGTAGGAGGCAGAGGCGCGGAGAAGACGTGGTTCACCCTCTCAAGGTCTCTTTGGAGGACCTTTATCTTGGAACTTCCAAGAAGCTCTCCCTCTCCAGAAATGTTATATGCTCCAAGTGCAGTGGCAAGGGTTCTAAGTCTGGTGCTTC
GmaAffx.91374.1.S1_s_at	CF807099	At5g56000	1e-119	Protein Destination & Storage			AGGTCATCCGTAAGAACTTGGTCAAGAAGTGCCTTGAGCTCTTCTTTGAAATTGCAGAGAACAAGGAGGATTACAACAAGTTCTATGAGGCTTTCTCTAAGAACTTAAAGCTTGGTATCCATGAGGATTCCCAGAACAAGGGAAAGATTGCTGAATTGCTCAGGTACCACTCCACCAAGAGTGGTGATGAGCTGACAAGCCTCAAGGATTATGTGACCAGGATGAAGGAAGGTCAGAGTGACATCTACTACATCACCGGTGAAAGCAAGAAGGCTGTTGAGAACTCCCCATTCTTGGAGAAGTTGAAGAAGAAAGGGTATGAGGTTCTTTTCATGGTTGATGCCATTGATGAATATGCTGTTGGCCAGCTCAAGGAATTTGAGGGCAAGAAGCTTGTCT…
[truncated: 1,097 more rows]
