# Supplementary material for: Microarray Detection Call Methodology as a Means to Identify and Compare Transcripts Expressed within Syncytial Cells from Soybean (Glycine max) Roots Undergoing Resistant and Susceptible Reactions to the Soybean Cyst Nematode (Heterodera glycines)
Source: Hindawi journal article supplement (doi:10.1155/2010/491217), 2010-01-01
Supplement: f9 [file 491217.f9.xls]

## Sheet: Sheet1
Probe Set ID	Representative Public ID	At Gene ID	At BLAST E-value	Functional Category	Subfamily	Gene Family	Sequence
Gma.3617.1.S1_at	BE659297	At1g68290	5e-91	Cell Growth & Division			GCAAAATCTCCACCATATTTGGGATAGTACCATACTTCTGACAGAAGTCGACAAATTTTATGACTCTGACATGGACGAGTTCATCGATGCACTTCAACAGAATATTACGAAAGTATGGGCCGATCAAGTAGAAGAATGGGAGAATTGCGGTGATAAGGACCTTCCATGCCCAGCTACATACGCATCTGAAAGTACCATAGATGCCTGTAAATGGGCGTATAAAGATGCCACGGAAGGATCCGTACTAAATGATGATTACTTCCTGTCACGTTTGCCAATAGTCAATATGCGGTTAGCTCAAGCAGGAGTTCGATTGGCTGCAATTCTTAATCGTGTTTTTGAGAAAAAGTTGGCAATGTCCATCTAGTTTATT
GmaAffx.5275.1.S1_at	BM522903	At4g21585	0.001	Cell Growth & Division			ATCGTATTTTTGACACACAGTTTGCAGTGTCAATGTAATTTATTGAAAGAGAGAATATGTCAACAATTTCCATGTTATTAAAAGAATAAAGTGTCAACTAATTTGTAGCTCAATTTCAACTCCTAGAAGTCATTGGGAGGGGACATGTGATGAGGAATTTTACATCATATATTAGAGATCAGAGATCCATGTTTTTCATTATTAATGCATTATTGTACCAAATAGGAGTGATCCTGCATTGAGTTCTCGTGCATACACAAATTGTAACATCCGTAAAACCATTTCGCTCTCTAGAAGCAATATGATATGCAGCAGTCCTCT
GmaAffx.54461.1.S1_at	BQ298559	At4g24000	8e-95	Cell Growth & Division			ACTTAGTAGAAGTCCTCTCAACTGGAGGAACAATCAGAAAATGGATAATTGAGCAAAGGATATGGATGATCTCATCCATCACATCCCATCTATATGGATGTTTGGATGCTCTACTGAAGAAATTTGGTTTAAAAGAGGCTAGTTTCTTGCCAACCAATAAAGTGGAGGATGATGAACAGACTAGGCTTTACCAAATGGACAAATTTGACTTCAGAACATCAAACATGTTCCTTGTGCCAATGGTTGCACTCCTCATCATCAACATATCTTGCTTCATAGGGGGAATCTACAGAGTGTTATCTGTGGGAGATTGGGACAAGATGTTCATACAGCTTTTACTTCCAGCTTATATCATTGTTGTTAACTCTCCAATCATTGAAGGTTTGGTGATAAGGAAAG…
GmaAffx.36227.1.A1_at	BU551398	At3g03050	3e-72	Cell Growth & Division			AGTTTGCTGATCTCTATATTGTGAAATGGACATCCCTTATGATTCCACCTATCACAATTATGATGGTCAACTTAATAGCAATAGCAGTTGGAGTAAGCAGAACCATATACAGTGTCATACCACAGTGGAGCCGTCTACTAGGTGGTGTTTTCTTCAGTTTTTGGGTCTTGGCTCATCTCTATCCCTTTGCAAAAGGTTTGATGGGAAGAAGAGGGAGGACACCTACCATAGTTTTTGTGTGGTCAGGCCTCATAGCAATCACAATTTCTCTCCTCTGGGTGGCTATCAACCCCCCTGCTGGTACTGACCAAATTGG
Gma.10796.2.S1_x_at	CA935397	At5g05170	0	Cell Growth & Division			GACCCGTTTACGACAAGAGTCACTGGTCCTGATGTTGAGCAGTGTGGAATCAACTGCTAGAGAAATAAAAGCTGGCAGATAGAACAACAACTTGCCACTCACCTGTTTCAACCAACAACATAAGCCTCCTGGGAATGTTGTGATTGTCTTCCAATTCTTTTGTTTACAGATTTTGATATTTATTCTTGCTGATTTAAGTTATGTGCAGTTTATGGTCCANNNNNNGAAGAAGAAATCATGTTTAAGTTATGTGCAGTTAATGGTCCATACAGAAGAAATCAAATTAGAATCAAATTATTTAAGGTTGTTTATTTTTTTTGTAATACTATGAACATACCTTCCATTCTTTTGAAGAAGCTGTTTGTCTTATTTAAACTATTCATCAGAAGACCACATCCT…
Gma.10206.1.S1_at	BU082029	At2g21770	1e-83	Cell Growth & Division			GAATGCCAACCATTATATTGGTTTGGTCAATCCTTCTGGCCTCCATCTTGACTCTCATGTGGGTCAGAATTAACCCGTTTGTGTCAAGAGACGGCCCCGTGTTAGAAATTTGTGGATTGAATTGTGACGAGTCTTGAATAAAGAAAAGCTGAAGAAGAAGGTTAGTTATTTTTCAGCTACACTGCAGTCATGTTGAAGAATGTAGCACATCATGCTTCACAAAGTTGCACGAATTTTCGGATGGAAGTTTTATTTTTCGGGTGTGTAGAGATT
Gma.14037.1.A1_at	BU548988	At5g41770	9e-37	Cell Growth & Division			ATGGGAATTCAGTGCTGTGCTCTTATGCTGGGTGTTTGAGAAAGCTCTTAACTACTTCAGATCATCAGCTCCAGATTTGAAAGAAGAAAGGGCAATGCTATTGGAGAAATGGCTCAACATGGAGGCTACGTCTGGAGAGTTGGGTGATGTTAGCTTAGTCCAGTCTAAACTGCCCAAGAAGCTCAAGAAGAGAAGGCATGTTGCCACTGAAGATGGTTCTACTAGAATTGAAGAATTCATCGACTATTTATTCCCNGAGGAAAGCCAGACAACCAATCTCAAGATCTTGGAAGCTGCTTACNAATGGAAGAAGCAAAAATTGTCTTCTGATGATTNAACAATATCTTNTNGCTGCTATACTTCTAGCGTGTATAT
Gma.4761.2.S1_at	BI945125	At5g27620	1e-106	Cell Growth & Division			GCTGCTTTACGCAACTCAAATGCATTCCACAGAGTCATTGACTTTGATAGTTATCTTAGGGGTATTTTTTCCCGTGAGAATTCCATGCATACAATGTCCGAGCTTTCTGAATCACTGGATGCAATTGATTCTTGGGTTAGAAAATACAAAAGTCCTTCTGAGAAGGAATTGAAGCATATCAACCGAAAACTGAAGTCTTGTTGGGGTCATCACTCTCATGACGAGGGCAAGAAGCGGGAGAAGAAATCAAAGCACAAGTCCAAAAAGAGCTCAAATGAAGCTCAAAATATGCCATCTATTGCCTAGCTCATTTCATATGGATGGCAATTTTTTTTTGTTTCTATTTGGATACAAAAAATGACTCGGTCAGTGGCCAAAGGAAAAGGAATCTTTTGAAAA…
Gma.10785.1.S1_at	BM528826	At5g45190	5e-07	Cell Growth & Division			GATGCCTCGGATGGTTAGTTGACTATTATGAACCTCTATTTGTGTTGAACAATGCTGGCTGTAGTGATGGCTGTCTTGTAAGGTCTACTGATACTGAAAATTGTTTTGCAGGCTTCGGAGTTCTCTGTGGCTTCAATTTAAACCCCATCATATTGCTGCTGGAGCTGCATATNCTNGCTGCCAAGTTTCTGAACATGGATCTCGCAGCTTATCAGAACATCTGGCAAGAGTTCCAGACAACACCATCCATACTTCAAGATGTCTCGCAGCAATTAATGGAGCTCTTTTAAAAGTATGGAAGAACTGGATTACAGCGTTCTTCTTAGTAGAGTAGGTTTTGAGTATATAATTCAAAATGTTATTTACTTTGGAGGGAGACATTAGGAACTATGACATATT…
Gma.5497.1.S1_s_at	CD414002	At2g27960	9e-39	Cell Growth & Division	Cell Cycle		GCCACACATAATGCTCTTCAGGAGGCCTTTGAATTATCAGCAGCAGCAGGAAAACCAGGCCCAGCAAAGCATGCTTGTCAAATGAACACTATCTATGCAAATCTGAAAGTGGGATTACAATGTTATATAGGTTTTAATTTTGTTGGTAATATGGATGTTATGAAGAATGAAGAACCCTGGTGGAATTCTCTTTTTGTGGAGAATTTTCATGTGGTTTCAACTGTCATTTTAATGTGTTGTTGACATGATGATGTGTCATGGATTTTTATTGGTGTACCTCTCGTGTACTCTTAT
Gma.13544.1.S1_at	CD417852	At3g50070	6e-58	Cell Growth & Division	Cell Cycle		GTATGAGCAAATCCCAAGCAGCCCAAGTGGCGTNATTGATGCTGCATTTTGCTCTGATGGTTCCAACGATTCGTGGGCAGTGGGGTCATCATTNNNATATTCACCACCAGAGCCTCTCTTCAAGAAGAGCAGAACCCAAGGACAACAAATGAANTTGTCACCACTTAANCGGNTCATTNTCGGAATTGTTGGCACCTCTCCTTAATTAANTANNNCCCTTTCACAAACCAAAAAAGAAGTCTTATATTTTATTTACTGTGGTAATTAGTCTTCCATGCATGTTGCTGAACTTCAGAGCCTTCCCCTCTATATGTATCTCTTCATTTCCAACAATGTCCCTCATTCATTTAACATTTCTTGAAGAGGCAAGGTGGTGGTGGTTCAGGAATGAGTGGTCTA…
GmaAffx.81579.1.S1_at	BG046441	At2g27120	1e-135	Cell Growth & Division			AAGCTAAGTTTCATGGTCCTTGTCATTCCTTCNTCTTATCCAATGTCATATGCAGCTATTGTAATGACTGCAGAGACTTGGATTTGTGCCGTGATTCGGCTTTATTAACTGAGGAGTGGCGTTGTGCAGTGCCACAGTGTGGCCAGCCTTATGATCGTGAGGTGATGGAAAATGCTCTTNTTCAAACTGTAAGACNAAGAGAACGGCTATACCAGCTGCAAGATCTGGTGTGTACCAGGTGCCATCANGTGAAAGCTGCACATTTGGCTGAGCAATGTGTATGTGCAGGCTCATTTAGGTGCAAGGAAGATGCAAGTGAATTTCGTGAAAAAATGCAAATTTTCTTGAACATAGCTTCTCATCAGAAATTCCAACTTCTCGAAGAATGCACCTCTTGGA…
Gma.2432.1.S1_at	BU544962	At1g67230	6e-08	Cell Growth & Division			GTGGTGATACCATCGGGACCTTTGTCAACAATATGGCCTTGAGTGAGGAGGTGAACGGAACAGCAGATGATGTGGAGGAGAATGATGCTGAGTATAGGAGTGAATCCCATGGGGAAGATGCTGCTGGTGGAGTTGAGAATGAGGATGACNAAGATTACCTGCAACCCGGTGAAGCTTCAATAGGGAAGAAGCTTTGGAATTTTTTTACAACATAACACCACAAGCTTCTTGATAATGAAGCTGTGTCTTGACCTCATCAACTTTAGGGATGATGTCGGAAGTTTATCTTGTATTAACAATTGGAAGTAGATCTCTAAATTATAACCACGAGGGGTAGTACTTAGGAGAGGTGATTGAATTTCTCTAGTTTTTTTTTTCTTGTACGTTTTCATGGATGTT…
Gma.1533.1.S1_at	CD417376	At2g47980	6e-82	Cell Growth & Division			GAGGATTCCATTAGTGCATATGAACAAGATGCACAAGATGAAGGGAAAAGACAAGAGGATGAGGATGACGATGACCGATTGATAAATTCAATCCCATCATCATCCAAGCTTAGGTCACTGGGAGTTTCTAGGGGGGAAAGCAAAGTATCTGCTTCTAGAACATCAGGGGCATCAAGCTAGTCTTCCACAGTTGTTGTTTACTATTATACGTTGACAATTGCTTTGGTACTCATTAATTACTACACTTATTAAGATTAGGAGTAGTAGTACTTGTTTATTATTCAACTTGCAGAATGTATATATGGAGCTTGTTCTGATCAAGTTTCCCGGTCTTTCTGCTGAAAATACATTAGTACAGTACCATGCCTCTTGAC
GmaAffx.84527.1.S1_at	CD410727	At2g26140	3e-56	Cell Growth & Division			GAGCTCAGAGACTAGGCTTCTTATTGAGAAAGAGGTGAAGCAATTCCTGGAGAGGGCCTACAACAATGCAAAAACTATTCTGACCACTCACAACAAGGAGCTTCATGCACTTGCNAATGCCCTTCTGGAGCANGANACNCTTTCAGGAACTCAGATAAAGNCATTGCTTGCCCAAGTTAGATCTCAGATGCNNNNNNNNNAGCAGCAGCAGCCNNNCCAAACANTTGAAGCTCAGANCAGTTNACAATCCAACACNGTGCCTCCATCATCNAGCAACCCGGCATCTGCTGCTGCTNCTGCNGCAGCTGCCGCCGCCACCACAGCCGCAGCTACAGCTACTGCTGCTGCNGCCAAGGCTAAAAGTGCTCCAGTGGGATCTTAGCAGGACAAGATATGCTG…
GmaAffx.89786.1.A1_s_at	CK605840		1.1e-24	Cell Growth & Division			CTCCACGGCCAGCTTCTTAGAGGGACTATGGCCGCTTAGGCCACGGAAGTTTGAGGCAATAACAGGTCTGTGATGCCCTTAGATGTTCTGGGCCGCACGCGCGCTACACTGATGTATTCAACGAGTCTATAGCCTTGGCCGACAGGTCCGGGTAATTTTTGAAATTTCATCGTGATGGGGATAGATCATTGCAATTGTTGGTCTTCAACGAGGAATTCCTA
GmaAffx.89786.1.S1_at	CK605840		1.1e-24	Cell Growth & Division			TCCTTACTATGTCTGGACCTGGTAAGTTTCCCCGTGCTGAGTCAAATTAAGCCGCAGGCTCCACTCCTGGTGGTGCCCTTCCGTCAATTCCTTTAAGTTTCAGCCTTGCGACCATACTCCCCCCGGAACCCAAAGACTTTGATTTCTCATAAGGTGCCAGCGGAGTCCTAAAAGCAACATCCGCTGATCCCTGGTNGGCATCGTTTATGGTTGAGACTAGGACGGTATCTGATCGTCTTCGAGCCCCCAACTTTCGTTCTTGATTAATGAAAACATCCTTGGCAAATGCTTTCGCAGTTGTTCGTCTTTCATAAATCCAAGAATTTCACCTCTGACTATGAAATACGAATGCCCCCGACTGTCCCTGTTAATCATTA
Gma.7835.1.S1_at	CD410897	At1g03080	1e-18	Cell Growth & Division			TAGGCATATATGATCAACTGGCAAAGGATACTGAAGAGTGCACATCCTCATCTTCGGACACAAGCACNATGCAGTTGGAAAAGCAAGGAGGACAAACGCAAAGAAAAAAGCTAACAGAACAAGCTCGAAGAGGTTCTGAANANATNNNNNNGTTGCAGNTTGAGGTGCAGAACATCCAGTATATTNTGCTCAAACTGGCTGATGTGAAGAACANNANATGCAAAAACAAAAACTCTAGACCAACAGGTGTGTTGCTGAAGGACTTTATTCGCATTGGAAGGAAAAATAGCAGAAGGCGCCGTAAGGGGTGTGTTTGTGGATGTTCAAGGCCTTCAACTAATGAGGACTAAGTCAGATACAGTATGTTGTGAGTACTTTTTTCGTTTGTGATGTTTTCTA…
Gma.5287.1.S1_at	CD403895	At3g48390	3e-62	Cell Growth & Division			GTGTCTTATTGTTTCTCTCATGTGTGTTGTCCTTTAGCTCCCACCGAATGGTGAATATGGATAATGGATAAATCTGGCTTCTAATGATCCTTTTATTTTTTTGTTCCTTTTACTTACTCTTTTTTCCCTGAATCATCTCACCGACAGAGTTTCCTGTTATCTCAGCCATTGTATAAAGTTAAGTTGGTCGCATTCCATTAACAGCTTTTTAGGATGTTGTATTGCACCAAGA
GmaAffx.90679.1.S1_s_at	CF806404	At5g63190	1e-123	Cell Growth & Division			GGTAGTGAAACTGTGCGTATGGCTCGGTCACTCATTGCTGCTCGTCATGCTGGTGAGAGGCTATTGAGATGCTGGGGTGGAGGGACTGGTTGGGCTGTGGAGGATGCCCAGGACAAAATCATGAAGCTCTTAGAAGAGTACCAAAGTGGCGGGGTTGTGAGNGNANNNNGCCAATGCATCCGTGATCTGGGAATGCCTTTCTTTAACCATGAGGTAGTGAAGAAAGCTNTGATTATGGCGATGGAGAAAANGAATGATCATATGCTAGATCTACTGCAGGAGTGCTTCAGTGAGGGCCTGATCACCATTAATCAGATGACAAAAGGTTTCACCCGAATAAAGGATGGTCTTGATGATCTGGCTCTGGACATTCCAAACGCCAAGGAGAAATTTGGCTTC…
Gma.17018.1.S1_at	AW733556	At3g24730	1e-10	Cell Growth & Division			AGCTTATTGTGAATTGTCCTCTCCCGCCAGAAAGTATACCAAAATTTCAGATACTATACAAGGATGTCTGAAAATTGAACTCAACCCTTTACTGCTTTTTTTTTTTCTTTTTCATAGGGATAGTTTGTAAATACACCAATGGTCACTGTTCTGTTTTCTTGTCTTTCTCCTTTTTGCTTAGCATGCACTGACCCGTAAGCTTGTGTCTATTGAA
Gma.2911.1.S1_at	BM891517	At5g56950	1e-106	Cell Growth & Division			GCAGCAGTAGATGCAGAAGGTCATTTATGTAGTTGTTGAGTTTTGTTGGTGTTCGAGAATGTTTGATGTGAAAGTGGGTTTCATGTTTTAATGCTTCTTAAGTTGATTTTCCTCACTATATCTTGGTAGTTCGAATTTGTTGAGAGTCCCT
GmaAffx.74863.1.S1_s_at	BQ785704	At5g56950	5e-49	Cell Growth & Division			AAAACTCATGTTCTCTCTTGGCAAGAACTAAACTTGGCATACTTTGCATAATAAAGCCACAGGGTAGATTATTCACTAATAAAAAATAAATTTGTGTGTCTTTGTCAACCAAAAATACAAAACTGTATGAATAGGATTTGTTCCAAGTAGATT
Gma.1422.1.S1_at	BE824233	At3g27280	1e-23	Cell Growth & Division			AAGCTGATTTCGGATGCCACTGCGTCCGCCGGGATGGGGCTGATTGAGCTCAGGAGGATTGAGGCGTCTAGGGAGGTCGCTGCCACGCTGGCCAAGTCGCCGAACGTGGCCTACTTGCCTGGAGGGAAGAACTTGCTCATGGCGCTCAATGCCGGTGGACGTTGATTCATGTATCTCTGTGTGTGGTTTTCACGATACGGTGTAATGGCATGCTTGGAAGGAATGCTGTTGAGGTTCTTCTTTGCTGGGGTTATTTTTTCCCCACCTTGTTTTGTAGACCCCATTTGTAACATGTAGAATTTGGACCTTCGCGTTGAG
Gma.431.1.S1_at	CD390728	At2g29570	1e-126	Cell Growth & Division			GAATACTTCTGTGGACAAGCCTGAAGAAGCNACTGTCATTGAGATGAATGAGCCNGTGTCCTTGACATTTGCTTTGCGATATATGAACTCTTTTACAAAGGCAACGCCATTGTCNAACACAGTTACCATTAGTCTNTCAAATGAGNTGCCAGTTGTNGTNGAGTANAAGATTGCTGAGATGGGTTATGTGCGGTTCTATTTGGCTCCCAAGATAGAAGAGGATGAAGAAGATACGAAACCTCAAGTTTAATCTACCTATTAGNNNNNNNGGTTAGGATATTAGGATTTTAATGTCTTTGAACTTGTAGCTTTCGTCATACATCTTCTGTTGAAGATATTTTAACCGTGTGAGCAATGAATTCACATTTTGTGGATTTCTTAGATGTGTATTGGTTACCT…
Gma.2457.1.S1_at	BI967559	At1g53050	9e-10	Cell Growth & Division			ATTCTCAGACAATTGATCCCAGGCAAATCGAAAATGGAAAANTTTCAACTGAAACNTTAATTCAGGATGGGCATGGATCCATGGGAAACAATATCTACCACCTCTCTGGTCCNTTACTGNTTTCNTCAAACAACATNGATCAGATGCTCAAAGAGCGTGATCGAAAGATCCAAGAATATTCAAGACGAGCAAGAATGTACAAGTCTGGTGAGATAGCTCATGCAAAGNAAAATTAGGATGATTCATAGTCAATTACAANTTNTTTTTCCAATTACNCAGCTAGNTACATTTTTTAATGACNGNGATATTTATCTCAAAATTATANNAAGAGANGNNAAGGGTGGAAAGTGTGTTCATGCACGCTTCTCTTGTTAATTACATATATAGTGTAAATTGCTA…
Gma.5244.2.S1_at	CD415693	At2g32080	4e-63	Cell Growth & Division			TTGTCTTCGAGTCTGATTTGTGTTATTTTATTTTATTTTCCCTCAGCCTCCTTTCTTCTTCTCATATTGTTCTTCCATTAATGCTTTTGAAATAATGCAAACTCTGGTTGGTCAGCAGAATAATTTGAATTGCTTGGCAAGGTTAATATGAATAGGAATAACGGAAGAAAAAAAGGATCAGAGACTTGTACTTGTTTGGATAGTTTGGCACCCAAGCTACAATCTGTAATAATGTTTGATTGTTTATTTTGCGTTCCTTGCACAGATTTCGCATGGATTTAAGTTCTCATGCCTACCATATGTTAGGTTGGTGACTTAACTATTTTGTAGGGTTTGGTTTCCATCTAACAGCATGAACTT
Gma.5244.3.S1_a_at	BM893397	At2g32080	1e-98	Cell Growth & Division			TGGTGCTGGCTTCATATCTGGTCATAGTACTCAACCTGCCACTTCTTCTGAGTTGAATGTGGACAGGTCTGTTGATTTGCCGCCTCAGGATGAAATTGGGAACTTGGGGGTCTCAAAANTAATCAGGGCTGATCAGAAAAGATTCTTCTTTGATCTTGGGAGCAATAATAGGGGTCATTTCTTAAGAATATCTGAGG
Gma.1540.1.A1_at	CD401434	At3g53830	2e-29	Cell Growth & Division			CTATCTCTGTAAGGTCTTCCGCTTTCCTAGCTTTCCATTTCTAGATTGTAGCTTGACACTANNACGGAGATGCAAGGTTTTTTTGGTTTGCATTAATTTATAGCGCCCTTTATGTGGATGAGACTGATCTTTATTCTTGGGAAGGTACAAGATTAGTGGTCTTGTTTCATGGTATTATTCGATATGACTGTGTATTAACGATATGTATTTTGTTCCATTATTATGTTCATGCATGGCATTGTGATTTCA
Gma.9509.1.S1_at	BU550018	At5g61960	2e-42	Cell Growth & Division			AGAAGAGTCTGCTAATGGGATAGACTCTTCAAAAATCTCTAACTGATTTAGCCTTCCTTGGGCACTAACTGTTCAACATTGCACCATAATGCCATGTCAACCCCCCAAGTCTGTATGTATATTGACATTTTCTTTTTATGAGAGAAGAGCCAGGAGGAAAAGGGGCTCACAATTTTTTTGCTTATAGAGGAGCCTTAAACACAAGTTTTCTGAGGCTAAGGTACATAACCAGAATGAAGTCACTGATTGTAGTAACTTTTCTTTATTTCCTAAATTTTTGCATGTAGTCCTGCTACCTACCTTCTCACGAGTTTAGAGAATGGATTTAACTGAAGCTCAAAATTTTTGTTAGCTTTGAACAGATGATGTCTCACCATTTGCATTAAATTCCCTTCAGAG…
Gma.4907.1.A1_at	BE659410	At4g11060	7e-19	Cell Growth & Division			TCCAGAGATATGTGTTCGCCGCGACGGGAAAATTTGCCTCATCAAGAGTGGGGAGAGCATTGATAAAACTTCCTTGGATGAATTGCGAGAAGGGTTGTTTTAGGGAAATNTGACCATCTAACGGAAGCATATACTTCTGTGAGAAACTTCACCTTGTTGTAGCAGCATTTGTAATGAATGCTTTGGTCCTCGATTTTATTTTTTTAATATACATTATTTAGCATTCTGAATTTCAGTTTCCCATGGTTATTTTCATGTGAGAGAGGCAGAAGAACATACTTGCTTTGGTCCTCAAACT
Gma.7007.1.A1_at	CD393631	At3g20780	1e-105	Cell Growth & Division			AGATGCATGCACGTGAGCAGCAGGAGAGGAAACGAAATCTAAGCAGGTATATTCNNGATGCTTCTGGTGCAGTATACAATGTTTTGAAAGAAATGACACAGTTACATGCATCAAAGAAGATTCGTTATGGGGATGATGATGCTGANCTACTGAGTAAAGTCTCTGAGAATTTGATTACTAAAGAAACACTGTGTGAAAAGCTTTCTAAACATGTTGAACAGGTTGACTATGAAATGGCATTGGAGTATGCCACGCAGAGTGGAGTAAGCGAAGAACCCAGAGAAACAATATACATACAATCATTGGAAGCTGAAAATAAGATGATTGACCTACAGACTCCATTTATTGTTTTCAGAGTCTTTCAGTAGGCTTAGAAAATTTATTTGATAGTGAAAAGAA…
Gma.5793.9.S1_at	AI443550	At3g10220	1e-102	Cell Growth & Division			TAGGATCCAGATGTGAGGTTGAACCTGGGGCAAAAAGGGGTGTTGTAAAATTTGTTGGCCGGGCAGAATCACTGGGTCCTGGTTTCTGGGTTGGTGTCCAATATGACGAACCCTTGGGCAAACATGATGGCATGGTCAAAGGAGTACGCTACTTCGAATGCCCTCCATCTCATGGTGGAATGGTTAGACCAGAGAAAGTGAAGGTCGGTGACTACCCTGAACGAGACCCCTTTGAAGAAGATGAAATATGAGTCTTCGTGAGGAAGTTGCTTTCAACGTGGAGGGTTTCCCTTNATGTAAATCNAACATCTGTTTGGAAAACTTACATTTGTTGACATTTCAAGGCNGTGGATTTGTCGAAGGGTTTGATTGTGGCTTTTGAANNNNNNNNNNNNTCTT…
Gma.6467.2.A1_at	CD412680	At5g58230	2e-31	Cell Growth & Division			CAGTCACCCAGAAGATGCCGAAGATGGTCCACCAGAATTGCTCTTTATTCATGGAGGTCATCCAAGCAAAATATCTGACTTTTCCTGGAATCCATGTGAAGATTGGGTTGTTGCTAGTGTCGCCGAAGACAACATACTTCAAATATGGCAGATGGCAGAGAACATATACCACGACGAAGATGATCTGCCAGAAGAGTCAACGAAGGCAGCGGCATCCTAATGTAATTGACGGACATGATAATTAGTGTAGTGTTGAATACAGGTTCAGTGTTGTGGACTCGGGGAGCTTTTTCCATATTTAAATTCGTGCTGCTACTTCGTTTTGCACCTTAGTTGTAGCTGTGTTTTGTGAGGTATGAACTATGATTGCCTTCAACAGTAGCATGCTGAACAACCGAG…
Gma.4051.1.S1_at	L22162.1	At3g23730	1e-121	Cell Structure			CAAAGCACCCTTTACAGCATACTACCGCAATTTCAANGCCANTGAGTTCTCANNCAAGTCTTCCATTTCAAATTCTGGNGCTGAATATGAGGCAAATGAGCTTGATNCTTATAGCAGAAGAAGACTGAGATGGGTTCAGAAGTACTTCATGATCTATAACTACTGCAGTGATCTCAAGCGATTCCCACAAGGTCTTCCTGCTGAATGTAAACGTTGAAGGTTCTAAGAGATGAAGAGAATGGTCACTTTCTGAGTTGGATTTGAATGGTCTATGTAAAATATGCTATGTTTATGTCTTAGATTCTTTACTGACTTCTGTCCTTTTTT
Gma.5666.2.S1_at	BE609637	At1g75780	0	Cell Structure			GTCATCCACATTTATTGGCAACTCAACATCGATTCAAGAGATGTTTAGGAGGGTCAGCGAGCAGTTCACTGCTATGTACCGGCGCAAAGCCTTCTTGCACTGGTACACTGGGGAGGGGATGGACGAGATGGAGTTCACCGAGGCAGAGAGTAATATGAATGATTTGGTAGCAGAGTACCAGCAGTACCAGGATGCAACAGCAGAGGAGGATGAATACGAGGATGACGGTGATGAGCAGCAGTATGATGACCAGTAGCTGGATCAATCTTAGGGCAATGCTCTGATGGTAATTACCAATGGCGTGATGATAACTTCTGGCACCGATCTACTTTTACTGCTATTCGTGTATCTACAGCCATATGAACTCTATTTCATTCCCATTTATCTCTTCTTTTAAAT…
Gma.11125.1.S1_at	BE822591	At2g41740	1e-132	Cell Structure			GGATGAGTTCAACACTGTATTTGGAATGGCAAAAGAAGCATTTTACAAGTTGCCAAGATGGAAGCAAGACATGCTGAAAAAGAAATACGAATTGTTCTAAACTTGAAATGAAAGAGTGACGTCTGCTTCTTTAGCTGCTATACCTTTCCTCAGTTATCTTTAAAATGCTCTTANCTGTTGNGATAGTGTGGTTTTATTGGGTATATACCATAGTTTGGGTTCTTATCATAGCGTTTTGCTTTCGGCCTATATAATGGGCGTAGCTGTGGTTAGTGTCCAAGTTTGAATGTGACGCCGCATGCATGGAGAGTGTTTTTTAGTTTCTCCTTTTAGATTTTGCTGTTGCCTCTTGCAATGTTTGCATATTGTAGCAATGAAGACACTAGACAGTGGGCAGGT…
GmaAffx.12900.1.S1_at	BI969287	At4g30160	1e-165	Cell Structure			CTTGTAGTGTGTATCTTAGAGCTCAAGGGAGCTTCTCTGTTTTTGCAGTGAGGAACTAAACATGTGGAAGTAAAAGGGACAGCATCAGTGTTTTTTTTAGCATAGCTGCATCTGCTCCCAAGAAACTTTTCATGAAGAGAAACTAGAGATTTTCTACCTCTANCCATCTCTTTGCAATGGTTTGAATGTTTAGNGTTATTTCTTTGATGAGTTANCTGCGTGGCATTAATTTTNTTTATAGGGCAGAGTTTGTTTGTGAGCTTGCTTTTNANTTTTTNTTTTTNTNTTTTGGGGACTCATGTTAGTCTTCATTTTATTTTTTTAATTTAAAATTGTTTTGGTAAAGCAATTTGGGTTGCAAATGCGGTCTACTTAGGTTGTATTGATATTGAGGATAAA…
GmaAffx.89309.1.S1_s_at	CK605560		1e-09	Cell Structure			CATGATGCTTCCTTTATGTCAAGGTGTGACATCTTTACTGATGTTACCGAGTACCAACTGTGTCNGGCATATGCCGGAGAATCTGGTAAAGGAAAGTTCNAACCTAAGTGGGACACAGACAATGTCACTCCCCAACTTATCGAGCAGTTCAAGCTAAATTGTGATGCCTCGGGTCTGCCAGTCAAAGTATTTGTCAGCATCGGAGGAGATGACCCCTTCAAAGTTGCTGCTGGTGGTGCCGATGATTGGGTTCTCAATGCCACAACCACACTCCACCACATCATCAACGAGTACCACATCGATGGAATCGATGTTAACTACACCACAATCCAGTGCAACCAAACATTGTTTGTTAACTGCATTAAGGGTCTCATAAAGGGCCTAAGGGAAGCTCTATGC…
Gma.2464.1.S1_at	BG839541	At5g15650	0	Cell Structure			AATGGCAAAGCGTGAATCGGTTTTTGGTTAACTGCATAACAGCCACANAACTTGGAANTGGAACTATTTATATACTGTATTTTTTTTCCTTAGTATTTATCTTCAACTTAGCTGTTATTCTCGGCTTAAAATTTGCAGCATTGTTAGCTGTAATTCTGTTTAATAACTTCATCATTTGAGCTTAGAAACAATAAGTACACCCGTAGGGCGTTACTTTCTTTTTATTATTGTTTGATGGGTAGAGATCACATGGCAGCATTTCGTTACATGTGAAATAATAGAAAGGTTATTGATGTATGTCTTGT
Gma.2464.1.S1_x_at	BG839541	At5g15650	0	Cell Structure			ATGAGCTTAACCCTGCGGGAGCATCAGTGGCCAATGGCAAAGCGTGAATCGGTTTTTGGTTAACTGCATAACAGCCACANAACTTGGAANTGGAACTATTTATATACTGTATTTTTTTTCCTTAGTATTTATCTTCAACTTAGCTGTTATTCTCGGCTTAAAATTTGCAGCATTGTTAGCTGTAATTCTGTTTAATAACTTCATCATTTGAGCTTAGAAACAATAAGTACACCCGTAGGGCGTTACTTTCTTTTTATTATTGTTTGATGGGTAGAGATCACATGGCAGCATTTCGTTACATGTGAA
Gma.7993.1.S1_at	BI967267	At1g62510	7e-27	Cell Structure			CCTCCTCAATGGTCTTGTTGATCTTGAAGCTGCAGTGTGCCTTTGCACTGCCCTTAGGGCAAACATTTTGGGCATCAACCTCAACCTTCCAATCTCACTCAGCTTGCTTCTCAATGTTTGCTCAAGGCAAGTCCCACGTGATTTCCAATGTGCTTAATCATCATGGTCTATGATATGCACAAGTTGCTTCGTGCTTATTCGTAGTTGTGGCTTTCCGTTAATGTCTTTTATTTTCAAATTTCATTGCTCATGGTGCGATTCCTATACGTGCATGGATGGTTAACTTCTCGTTATTCTGTCGCTTTAATTAGTGTTTGTTTTATTTAGCAAAGTGTCGAATT
GmaAffx.86805.1.S1_at	AW755915	At1g11580	3e-36	Cell Structure			GTCAGCTCGCGCCTTTATGAAGGACGAACTCGAGGACTTGATATCCAGAGCAAGAACTTCTCTGGCCATGTTTGTTGCTGTTTTGCCCCCAAAGGTTGAACAAATTATTGATGAACCTTTAAGTGGAGACTTTCCCTCATGGGTGAGCAGCAAGGATCGGAGACTTTTGGAGTCTACTGTTGGCGAC
GmaAffx.90027.1.S1_s_at	CF805750	At1g11580	2e-19	Cell Structure			CAGGCCTAGAAAATCTGTTTCCAAAACTATCTGCTTAATCTTTTCTATAGCTGCTGTCATGATCTCATCAGCCTTTGTTGGTTCTTATCTCATCAAATCCACCTCCTTCTTCAACCAATCCTCTCCTCAACATCTCTGTGATCATGCACTTGATAGGGCAACATGTTTAACCCATGTCTCAGAAGTGGTACAAGGTCCGATCTTGACCCCCACAAAAGACCACAAATTCAATTTGTTACAGTCATTCCTAATGAAATACACCTCACACATTAAGAGAGTTATGAACACAGCCAGTTCTATCAAACTTAGGATCAACAGTCCCAAAGAAGAAGAAGCTTTGCACGATTGTGTGGAGTTGATGGACTTATCTATCAGCAGAGTTAGGGACTCAATGGTGAC…
Gma.2262.1.S1_at	BE821923	At3g14310	4e-96	Cell Structure			AACACTGGGCCTGGTGCTGGTACTTCTAATAGGGTCACTTGGAAAGGGTATAAGGTCATCACTGATNCTGCNGAGGCCAGGGANTATACTCCTGGAAGCTTCATTGGGGGCTCTAGCTGGTTGGGCTCAACTGGGTTTCCTTTCTCTCTTGGTTTGTAAATTATGTGAAACTTTTGAGTCTTGTAATTGTTACCTATTGTTATTGTTATGTGGCAGAGAGAAACAAATTAAGTTGGCCCAAATGTTTAGAAGAAAACAAAAAAAGGAAAGAGGGAGAGAGAGAGAGATTATTGCTGGAGAGGTGGGTGGGGGGTTTTAGTTTATCTTTCACTTGTATTGGTTGGGTTTTGGAACACACCATGTTCTTCTACCTTAGGCTATTTATTGTGATAGTGCCAT…
GmaAffx.9520.1.A1_at	BI970995	At3g19960	3e-12	Cell Structure			GCGAAGATGGCGCACTTGAGAAAATGAAGAAAAAGTGGTGGGGAAGAAGGAACAGTACAAGGATAAATTGATTTTTTTTCAAAATTTTTAATTTATCTTTTATTTTTTTGAGTTCGGTTTTGGTCTATGCACTGTTTCAAGAGCATTGCCAACTATATATATCCGAAAGTGAGGAAAATACAATAGGAAAGGTAAAAAAAAAAAAAGGAGTGGTAGGAAGAGTCCAAGGATGAGTGAATTTAGTGTAGTTTGGGTTNGTTGTTGCTANCCACCTTTCTTTAATTAGTAATTTCTGCATGAATTGTTGAGTAAGATGTATACTACAAACCTTAGTGATTCGTGTATATCGCTGATGCCCATGCCTTTTCTGGTATGTGGATTGCATGTCAAATTTGTTGT…
Gma.8821.1.A1_at	CD403460	At3g47690	8e-15	Cell Structure			GAAATTCTCTGTCAGGCTTCAGAACTAGAGAACGATCCTATGTCTCTAGCAATTAAGAAGATTNTGTATGCTGCTGATGCAAAAGGATCAGCACTAGATGAAGCTCAGGAGTACCTTAATGAAGTCATCAATGGCAATGAAGATGAAGCTGAAGCTGAAGCAGAAGCTGAAGTAGAAACTGAAGCCTGATTANGNNNNNTCTTACAAATAGATCCTGGCTGGTCCTTGTTAAACAAGCTTAGTTCCATCTGTGATGACTGAGACTGCTGGTAATCTGCCGTGGCCATGAATTACCATAATGACTTAGCTGTAGTTGTATGGATCTTTTGTTTTCTTCTTGTAAGCCTGGATCG
Gma.11156.1.S1_s_at	CD393261	At4g28300	4e-26	Cell Structure			CTCATGGTCCGAAATCCGAACCAGTCACAATTNGTCCGCAACCATCCCTACAATGAGTTGATTGAGAAACTGGTGAGCATGGGATTCAGGGGTGACCATGTTGCAAGTGTGATCCANAGGATGGAGGAGAGTGGACAGGCCGTTGATTTCAACTCAGTACTTGACAGGTTGAGCTCTGTGGGTCCTCAGAGAGGAGGATGGTCAGGGTGATGAAGAACTTTTCTGAACAGTTACTTTG
Gma.2931.1.S1_at	CD418132	At4g28300	2e-28	Cell Structure			GCTTCCTCCACCTAGTGGTGCATACATGATGTATGATGGTGAGGGAGGAAGAACACATCATCCACCCCAACCTCATTTTGCTCAACCTGGATATCCCCCAACAAGTGCTTCCCTTCAGAACCCTCCACCAGGTCTTAATCTCATGGTCCGAAATCCGAACCAGTCGCAATTCATCCGCAACCATCCCTACAATGAGTTGATTGAGAAACTGGTGAGCATGGGATTCAGGGGGGATCATGTTGCAAGTGTGATCCAGAGGATGGAGGAGAGTGGACAGGCCATTGATTTCAACTCGGTACTTGACAGGTTGAATGTGCATAGCTCGGTGGGTCCTCAGAGAGGAGGATGGTCAGGGTGATGAAGAACTTTTCTGAACAGTTACTTTGTCTACCAAACTAA…
GmaAffx.6824.2.S1_at	BQ094655	At1g14890	2e-50	Cell Structure			GGGAATGCCTTGATTTTCAACCACGTGTCAGATTACTTACCGTCCGATTTTATACATCTCCAAACTCGAAAAAAAAAAAAAAGTAGTTAAAGAATAGGTTGTGTTAAATTTGGCGTTNAAAAACAAAAAGTGCCGTGTGTGTGGGACGCGTGAGCCCTTCTTTCTTGTGTTGTAAATTTTGGTATGCTTGTAGACATATTTGCTGTCACTCGCTCAAGAAAGTAGAGAAACGCATCACTTCAATCACGTGATAGAATGAATGAAGAGTGTAGATAACTATATGGGGGGAAGAAGAAAAAACAAGTGAAAGTTGAGTGTGGAACTTTGACTTGTTACTTT
Gma.7270.1.S1_at	CD415919	At3g29320	1e-174	Cell Structure			TGATGAAGCATACCGGAACCAAACTAAATGGACAAGAATGTCGATATTGAACACAGCAGGCTCATACAAGTTTAGCAGTGACCGCACGATTCATGAATATGCCCGAGAGATATGGAACATTGAACCAGTTCAATTGCCGTAGAAAAAGTATATATAATAATGAATGAATAGCAGAGAATTGGTGCCACGTGGTTGTGATGATGATCACTGCTTAGCTTAATTCCTCGNAGCAGAGAATAAAATATAACTTTTGCATAGAGACGCGCTTCATGGNGGTGCGCTCTTGGTCAAAATAAGCTTGCAGTTCTGTCGGTGTAAATCAAACCTCTGTCTTATAATAAATATCAAATTGTTTTAGCTTCAAANNNANNNNNNANANNNNNNNNNNNTTCATTTCTT…
Gma.15979.1.A1_at	CD414564	At4g23500	1e-14	Cell Structure			AAGAAGCAGCCTTGGACCTGCACTGATATTGAAGGGATGACGAGTGGGGTGACCCCTCCACCTTGTGGTCTGTTACCTGATCAAGGGCCGGAGAAGATCACNNNNNNNGATTTCCCAGCAGATAATCTACCTATTGACATAGTGGAGCTTAAGAAATGTACTACCACCATGACATATGTTGAAGTGTAGTAGTTTATGCAAGTTATTGTTTTAGGAATAGTCCTTCTCAGATTATCAAAAAAACATTTCTCAAGTTAAGAAATGAATGGTGTTTCAAATTATAGANATGGAACGGTTGTCTTTTCTTCTCTCGTTTANNNAANNNNNNNNNNNNNTGCTGCTACAAGTTTCATAGCTAAT
GmaAffx.20675.1.S1_at	BM954626	At1g26560	1e-108	Cell Structure			ATACATTTGCCACCCAAGGATATGATGTTGGTCTACAAGCGCCTGGTCGATGCTCCATTCTCCTTCANCTGTTTTGTAGAGCGGGGAACTCTGCTACTGAACCTTACATTGTTGCACACAATGTCCTACTCTCTCATGCAACAGTAGCAGATATTTATAGGAAAAAATATAAGAAAATACAGGGAGGATCACTAGGGGTAGCTTTTGATGTCATTTGGTATGAGCCACTAACAAATACCAAAGAAGACATTGATGCAGCTCAAAGAGCTCAAGATTTTCAGCTGGGCTGGTTTCTTGATCCTTTGATGTTTGGGGATTATCCAAGCTCAATGAGGACTAGAGTAGGAAGCAGGCTACCGAAATTTTCGCAATCAGAAGCTGCTCTTGTTAAGGGTTCAT…
Gma.4597.1.S1_at	AW099840	At1g61820	4e-24	Cell Structure			GTGAGAGGTTACTTTGCCTGGTCTTTGCTCGACAACTTTGAGTGGCTATATGGGTTTTCAGTGAGATTTGGACTTCACCANGTAGATTTTNCNNNNNTNNNGAGAACTCCAAAATTATCAGCAATTTGGTACGAGCATTTCATTGAAAACTATAAACTAACTGATAGCATTGTGCCCGAACATGGCAGAGAAAAGGGAATCTGGAACAAGCCAACTACCCAACTCAGAACCTTAGTAAGTCCAGAGCCTAGAATGAATAACTTGGATTAATTTGCAATGAAATACCATATGCTTTCTCTTTTGAATCTTTATATTTGATCCACCACTTTTCGGACTTGAA
Gma.8371.1.S1_at	CD399193	At2g16230	1e-144	Cell Structure			CACCGTGTTGTACGATGTTGGATTAACCAAGTCTAGCCAGCAGACTCCAACAACTCCNGTAACTCCAGCACCAAACACTGCTGGATGGTGTNTANCNAAAGCTGGAGTTTCTGATGCTCAGTTGCAGGCCAACATTGACTACGCCTGTAGCCAAGGTATAGATTGCGGGCCAATTCANCCAGGAGGCNCTTGTTTTGAGCCTAACACANTAGCATCCCATGCTGCATNTNCCATGAATCTNTACTANCAAACTTCTGGCAAAAATCAATGGAACTGTGATTTCTCTCAATCAGCAACACTCACATCCCAAAATCCAAGTTACAATGCTTGCATTTACACTGGTGGGAGCACCTGAAAACAGAGGCT
Gma.7092.1.S1_at	CD396678	At5g55180	1e-143	Cell Structure			AAGGGCCAGACATGGTGCGTAGCTAGTGGCGGTTCTTCGGAGAAGAAGCTGCAGAACGCTCTTAACTACGCTTGCGGAGAGGGTGGGGCTGATTGCACTCCAATTCAACCAGGTGCCACGTGTTACAATCCTAACACCTTGGAGGCACATGCTTCCTACGCCTTCAACAGTTACTATCAGAAGAAGGCACGTGCATCCGGCACGTGCGATTTTGGTGGCACTGCTTATGTCGTCACTCAGCCCCCTAAGTATGGTAACTGCGAATTCCCCACAGGATACTGAATGGACCACGGAGATGGATTGTTTCTGGTGAAGCCTTGATTTGGATTTAACTGGGATTTGCCGGAGTTTTTAGGAGCTTTTCTCTTCTTTGTTATCCATTCGTAGCACGTGTTTAGG…
Gma.2245.1.S1_at	CD391149	At3g55430	1e-144	Cell Structure			AGGCAGATGCTAGCAACCAAGCTTTGCAAGCAAACATAAACTATGTGTGCAGCCAAGGAGTTGATTGTAGGCCAATTCAACCAGGAGGAGATTGCTTTGCAGCCAACAACGTTAAGGCTCTTGCCACTTATGCCATGAATGCCTACTACCAGGCCAATGGGCGCCATGATTTCAACTGTGACTTCTCTCAAACTGGTGTTATTACTACTACTAATCCAAGCCATGATAAATGCAAAATCTGAGCATGTTTATTTAAAGGTTATAATCAGAGGCAAGAAAGGAAGATAGAGAAAAGCCCATTGTCATGGTGTCAATGTGGCTTAGTGGTATCTGTGACTCTGAGATTATGCATTCATGTACTCAAAATTATTTAGTTTGTATATTGTTCTGGAAGAAGAA…
GmaAffx.68709.1.A1_at	BI969418	At1g71380	3e-32	Cell Structure			CTTGCCTTCAATAGCAGCTCATCCACAAAGCATAGGGTGTGATGGAGGTTTCAACCCATTTTTCCATTCGATGAATCCTAATCCTAACATATTGGTTGGAGCCATAGTCGGAGGTCCAAACCAAAATGACGGATTTCCAGATGACCNNAGTGATTACAGTCATTCTGAGCCTGCAACTTACATCAATGCTGCTTTTGTTGGACCTTTGGCATACTTTGCCGGTATCCGCTAATGTTTCATTCACCTAAATTACAAGGTTAAGTCTAGATGTCATTTTATCTGCACCCAAAT
GmaAffx.2778.1.S1_at	BU544520	At3g26380	1e-100	Cell Structure			GAACCCTAATGGGACCCTGGTGAATAGTTATTCTGGCTTGTGTGCAACAGTAGAATCTAGTGAAGATACTATTAATTCTGGTGGCTTGCACTCTTGGATTGCTACAGGAAGAAAAGGAGAAGTCTACGTTGCTTTCTTCAATCTAAGTGAACAGAAGAGGGTAATATCTGCAAAAACATCAGACCTGGCTAAGGTTCTTCCTGGCAGAGACTTCAGTTCTTGTCAGGGCAGTGAAGTGTGGAGTGGAGATGCTATAGAAATAACTCNGGGAACGTTATCAACGGCAGTGGAAGTGCATGGAAGTGCACTAATTGTTCTCAATTGCAACGAGTCCCCCCTCCTTTCCCCAAAAATAGAAAGAAAGAAAGAAAATAAGTAAAGCAAAATGGCATTTCATTG…
Gma.6130.2.A1_at	AW309809	At2g31960	9e-15	Cell Structure			GACAAAGTAATGAACGCTCCTCTAACCACAAAGAGTGACACTGAAATTTCATTTTCATCGATTATCTTTTATCAAACGTTTCGACCATGTGTCGTTACATTATTTTAAGAGGTTCATATACTCTTTAAATAATGTGACCACATAGATTGGATGATAATGAAAGATAATAAGATGCTTATTCATATATACTTGCGATTTTGTACATGCTTTAGTATGGATTACAGTTTAAAAGTTGTATCAGAACAGCTAGGCTCTCTATTCTGTAAATTGTGCTAGGTTTTATAATTTTATATAGCGTTTAAATGCCTTTTAATTACCCATTTTTTGATGAATCCTTCCTTCTATCTTTCTTCGTTTTGTGATGATGAGAAAGGGGTTTAACTCACTTGAGCAGGGTGA
Gma.5833.2.S1_a_at	BE801610	At2g18050	2e-25	Cell Structure	Histone		GCCAAAGTGACGAAGGCCAACGCTGAGAAAAAGGAATCGCGTCCAAAACGAAGCAAAACCGCAACCGCCGCTGCTCCGAAGAAAACCGAGGCGGTTAAAAGGGCAGCGAAGAAGGTAGGGCCGAAGA
Gma.5833.2.S1_s_at	BE801610	At2g18050	2e-25	Cell Structure	Histone		TGTGCCTTGCTGCACAATCTTGAAGAAAGTTGTGTAGTGTAGGATGGTAGATAGTTTAGT
Gma.5443.2.S1_a_at	BM891269	At5g54640	5e-14	Cell Structure	Histone		TCAAAACACTTCAAACATCTCGAACGCTCTCTTTCCG
Gma.17692.1.S1_at	CD393918	At1g52740	9e-57	Cell Structure	Histone		GATTACTGGTGAATGATAGCAGCTTGATGGAAAATTTCTCTACTAATTGTGTATTTGTTGCATGACACTTGAAAAACACAGTAGGGCCTTCTTCTATTTATGACTGAGTTGCTGCTGTTGATCATGGATATAATATTTAGTGTTTCTCTTTGTTAATTTAGTATGTCNNNTATCACTGAAAATCTTAATTGAGGATAATTCAATCTGATGGCATTGTATTCA
GmaAffx.70462.1.A1_at	CD391648	At1g54690	7e-29	Cell Structure	Histone		CTTGCCGAATATTCATCAGACTCTACTTCCCAAGAAGGTTGGCAAGGGGAAGGGCGAAATTGGATCAGCTTCTCAAGAGTTTTAGGTTTTTNGTTAGGCCTATTTGGACTATAGTTTTTATTTTATTGCGGTTGTAATATACATGTTTTGGTTAATTTTTAGATATCTGCTCTGAGGAATTAAGTGTTTCTCAGTCTTTTGAACTGGATGATTAATCTCGCTTTG
Gma.1975.3.S1_at	CD393546	At1g07790	2e-46	Cell Structure	Histone		TCACTAGCTCTTGAATTAGCTATCTTATCGCTTTCCAAAGACTCTTTTCTGTCCCAATTTGAGATTTTAATCAGTAGTAGACTTTTTTTTTTNGTTTGATAGGATTTGTAATTGAAAGAATGGTCCTGGGTTGATCCTTTTGTGTATTGAAGTGGCAAGATGTATNNNATTATATAGGAACGCAGTATTGTTTAGTATTATACTTTCAAGAATCTCCAATCGGCCATTCGTTAATAATTGTTTTTTCGGATATTTGTTTGCTTGAACTTTCCAGNNANNNANNAATAGTGTGCAAATCTTTTGAAAACTGTNNACNTTTATCGTATAGGAATCATTTTCCCTAA
Gma.11213.2.S1_at	BQ298544	At5g10980	1e-71	Cell Structure	Histone		GGCTGCAAGAAAATCTGCACCTACCACCGGTGGAGTCAAGAAGCCTCATCGCTATCGTCCTGGAACTGTTGCTCTTCGTGAGATCCGAAAATACCAAAAGAGCACAGAGCTTCTGATCCGCAAGCTCCCCTTTCAGCGTCTTGTTCGTGAAATCGCGCAAGACTTCAAGACTGATTTGAGGTTCCAGAGTCACGCGGTTCTTGCGCTTCAGGAAGCTGCGGAGGCTTACTTGGTGGGTTTGTTTGAAGACACCAACCTTTGTGCGATCCACGCCAAGAGAGTGACCATCATGCCCAAGGACATTCAACTCGCACGCCGCATCCGTGGAGAACGTGCTTAGGCTTATAATAATGATAATAGCATAGTTGTCGCCTTTTCGTTTTGCAATACATTTCTTGT…
Gma.11176.1.A1_at	CD392100	At5g65360	3e-65	Cell Structure	Histone		CCCACCCAATTCAGTTTTCTCAAATGGCTCGTACGAAGCAAACGGCTCGCAAGTCCACCGGCGGCAAGGCGCCACGTAAGCAGCTGGCCACCAAGGCGGCTCGTAAGTCTGCTCCGGCTACCGGCGGCGTGAAGAAGCCGCACAGATTCCGTCCGGGAACCGTAGCGCTCCGCGAGATCCGGAAGTACCAGAAGAGCACGGAACTTCTGATCCGGAAGCTCCCGTTCCAGCGATTGGTNCGNGAGATCGCGCAGGACTTCAAGACCGACCTTCGATTTCAGAGCTCCGCCGTCTCCGCCCTCCAGGAAGCCGCCGAGGCCTACTTGGTTGGTCTCTTCGAAGACACCAATCTCTGCGCTATTCACGCCAAGCGTGTCACTATCATGCCCAAGGATATTC…
Gma.9164.1.S1_at	CA802402	At5g59970	6e-40	Cell Structure			TTTTCCTCCCAAAATGTCAGGCCGTGGAAAAGGTGGGAAGGGTTTGGGAAAGGGAGGAGCTAAGAGGCACAGAAAGGTTCTTCNTGACAACATTCAAGGAATCACGAAACCTGCGATTCGTAGGTTAGCGAGAAGAGGTGGCGTGAAGAGGATCAGTGGTTTGATTTACGAGGAAACCAGAGGAGTTCTGAAGATATTCTTGGAGAACGTGATTCGCGATGCTGTAACCTACACTGAGCACGCTAGGAGGAAAACTGTTACTGCTATGGATGTCGTTTATGCTCTCAAGAGACAGGGAAGGACCCTCTATGGCTTTGGAGGCTAAAGAATAGAATCTTTAGGTTTAATGACTGTGTTGCAGGATNAAACATTGGTTCTTTTGAATTTGCGTGAAGTTTA…
Gma.1932.1.S1_s_at	BI970420	At3g05520	1e-109	Cell Structure			GAAGATTGTGCACTTGCCATAACAAGCATTATTCGTCACCATGAAACAGAGTACCTTGCTTCTCTTGAGGCATCATATCTAAACCTTCCTGATTCTACTTTCAAGGATCTTCGGAGAAAGCTTCCCGTCACCCGCACCTTATTTCCATGGCATAATACTTTGCAATTCAGCTTGACAAGAGACATCACAAAAGAACTTGGCATTGGAAAGTAAATACACACAGAACAAATAAAAGTTTGTGTTTACTCGATGGCGACAAGTTCCTCATATATTCACTACATGTCATTTGATCAAGTCAATCATTCTTTGGGTTGACGTTCGTTATATTCACCCATTTGCTTCATGAAGTACCCTCCTTTGTCTGAGTAAG
GmaAffx.3778.1.S1_at	BF067565	At5g03170	2e-34	Cell Structure			AAGCCAAAAGGTTCTCAGTCCTCACTCGCCTTCTCAAAACCACACAACTCATAAACCAACTCAACTCACAGCTCGTAACTTCAAGCTCAGGAGGGTTAACCCTATTTGCACCCGAAGACAGTGCCTTCTCCAAACTCAAAGCAGGGTTCCTCAACTCCCTCACTGATAGACAGAAGGTGGAGCTCTTACAGTTCCACACTCTCTCTTCCGTCATTTCCATCTCAAACTTTGATACCCTCACGAACCCGGTTCAGACGCAGGCCGGTGATGACCCTCAGAGGCTGCAACTTAACGTCACCACTTACGGCGGCAGCCAGGTCAGCATGGCCACCGGCGCCGTCAACGCCTCCGTCACCGGCACCGTTTACTCCGACAACAAGTTGGCCATATACCAGGTGG…
GmaAffx.31456.1.S1_at	BF596233	At5g04460	2e-05	Cell Structure			TTGAGGTGGTCCGAGCATATTCCATACTGTAAAAAGGAAATTAAGAGGACATAGAGAAGAAAAAAAAGTCTCAGGAAGTTGATCTCAATTCTAAAGGTGTCGAGGTTCTTATTTATAAGTGTTTAGTAGATGCCTTTGTTTTTCTGATTATATGGAACTCCACGAATTGTATAATTGGATTAGCAAATGGCGCTGTTGATTCATCATTCTTACGTAAATAAATAGTTGCCCTGATTATTCTTTGAAAA
Gma.1106.1.S1_at	CD416163	At5g53330	1e-53	Cell Structure			ACGGAGCAACTTCCAATTTGATTTTGGATTGGAGAGAAAAATTTTAGCTGAAGCAGAGAAGGATAACCCAAATTGGAGCAAATTTGGATCAGAAAATATTCCAACTAAAGTTTCTGATTCATCAACAGCAAAGGTTACTGCTTTGGATCCCATTGTGAGCAAATTTATGGCCATGGGGCTTAGCCGAGAGGCTGTTCTCATTGCCGTTGAAAATTATGGTGATAATCCAACCAAAGTTCATGAATTTGTCAATGGCTACACCCTTTTGCGTGAAATGGGATTTTCATCAAATAGCGTTGCTGAAGCCCTGGCTATGAATGACAATCATACGGACAAGGCACTAGCACAATTGCTCAATGGCTCGTCGTGAGACTCCTG
Gma.4452.1.A1_at	AW310094	At2g32240	1e-05	Cell Structure			AATCCTCAGTTAAGGGTGATGAGAGTGTTGATCAGAAAGAAGGGTTGGAAGTAAAATCCAGGGACATTGGTTCAAGCCTCTCGATTCCATCAAAAAGAAAGAGCAAGAAAAAGTCAGAAGTAACAAGTGGTCAGACATCATCTTCATCCGAGACTCATGTTCAAACTGGCCATGATTCTCCTGTCATAAATTTCAAGTTCATCTTGGGNGTAGCTCTTGTGTCCATTGTCTTTGGCATAATTCTTGGAAAGCGTTACTAGTATCAGCAGTNTATGTCTTTTGATTTTGTTATTCTTCATGTTTTTTCATTTTTTATGTTTTTTTTTTCTCTCTTCTTTCCCGTTGATTAAGATTAAATACAGATTGAAAGCTTTCTTTGCATGCTTTCAAACTCAAG
Gma.5785.1.S1_at	BI943300	At1g64390	0	Cell Structure			CTCAATATTTCAGAGAAGAGTCATCNCTTGTATTTTTCAACAGCTTTGGATGTCTTTTCTGTGTTTGATGTTGTAAGCTTTGCAGCATTTTGTANTCTCTACAGAGAAACAGTTTGTGCTATATAGTATTATGTTTTTGTGCTGTGCAA
Gma.13110.1.S1_at	CD394837	At1g69530	2e-44	Cell Structure			ATCTTGTTGTCACACGCATACCAGTAGTGCTATATAGTATAATAGATATATAGTATTATGTTCTAGGAGTATTATTATTTTTATGACTGGTTAGTGTACTAGGGTATTAGATAGTATGCTACTAGGTGAAGGGTAAGTTTTTTTGGTGATTTTAGAGGCCAGGGAATTAAGATCTAAGAAGGGGCATGTTTTAAATTGCTCCTTCATTTTAATTTTAATTTCTCGTGTCAACAAGTGGGGACCTAATTTTTTAGGCCCCTCTTGATTACTGGGGTGGATTACTCTTTTCACTTTTTCTAAANGNTTTNTTTTTTTAACCTTCTTGTGGAGAGAAGAAGCTAGTGGCAGTGGACTTTTTAATTAGTTTTTACTATGGGTGAGCTACTAAATTGGAAGAGG…
Gma.7784.1.A1_at	BM269985	At1g69530	0.0007	Cell Structure			AGTATATGCTATAATTTCTCAATTTAAGTGTTAGTATATGACTCCAAAAAAAAGACTAGTATACTAAGGTATTAATATAGTATGCTACTTGGTGGAGGAGGAGGGGGTGGGGTCAAATTGGATCGCAAAATGGTTAAGGGCTTATTTTAAATTGGCTCTTGATCATTTTTTATTGGGTCAAATGGGGGTTCCTAATTCTTGGGGCCTTTTTTTATTATTGGGGNATTTTTATTTTCATTTTTGAAAGCTTTTTCAACCTTTTTGCTGCTGAAAGCTGGTAGAGAGGGAATTTTTATATCTGTGACCTATTAAATTGGAGGAGGTGGACTGTTGCACCACCCGCCATTAGTATAGGAGAAGTTTTTGTTTTTTTTTGTTCCCTAATGGGATTATTTAGAA…
Gma.10775.2.S1_s_at	AI759701	At1g26770	6e-41	Cell Structure			AGCTGGTGATGTGAATTCAGTGTCCATCAAAGGGTCCAAAACTGGGTGGCAACCCATGTCAAGGAATTGGGGGCAAAATTGGCAGAGCAACTCATACCTCAATGGACAATCCCTCTCTTTTCAAGTCACCACCAGTGATGGTAGAACTGTGACAAGCTTCAACGTGGCACCAGCCAATTGGCAATTTGGCCAGACCTTCCAAGGAGGCCAATACTAGAGACATTATTGCAAATTTACAATGGGGGGTANAAAATAGTGCAACAAAAAAAAANNTGTTTGTATACCTATTATTAATCACCTCATTGGAAGAACCATTAAAAGTGTCATTAATAGGTATTGATTCTTGTAACTGTGATTCTGAAAGGCCAGTGTTTTTTATTT
GmaAffx.90097.1.S1_at	CF805822	At3g55500	2e-24	Cell Structure			GTCTAATTACTATGTTTCATGGCTTTTTTTTTTTTTTTTTTTTTACCTCTGTAGTTTTGAATTTACCTTGGGATGTGGATATAAGGGAAACGGCGAGAAAAAAAATGGTGGGAAAGTAATGTTGTGGTAGTGATTAGTCAAACTTTTTGACTTTTTTCGTTGTCTTGGTATACGAGTTTGAAGTTTTATAGTAGGATTCTAGGAAAATGGAGGGAAACTTTATGTAACGGGCTGAAGTGGCTTCAAATGCATGAGCCCGCAGCTAT
Gma.7006.1.S1_at	AF516880.1	At2g39700	1e-117	Cell Structure			AGGGTTACCGGCAGTGACCGACGCACCTCAACCTCCTGGAACGTGGCACCACCTAATTGGCAGTTCGGACAAACCTTCACCGGAAAGAATTTCCGTGTCTAAATCCAAGAAGAAGAAGAAGAAGAANNAAAGAGAGAAGAAAATAACAATACTCTTAAATTAATGGCTCCTGGTATTTTTGAGTTTGTTTGCTTCAGTTTCCCTGCTTCTAACTTCCCTCTATTTTCCTGGGANAGNTTTGGAGTNGGTGGTAGGGGGTTAAAAGAAAATTAAGAGAAAGGTAGTTTTAGGAAAAGTAAAAGTGAAAGTAAGGTTAATAATTAATATAAATGTAAGTCGGGGGGGNTGTTTGCATTAAATGTTAAAGTGTTTTATGTATGGGTGATGCTGGAATATTAA…
GmaAffx.671.1.S1_at	CA785167	At2g39700	1e-25	Cell Structure			GGTGGGTCAGGCTTTGTCCTTCAGAGTCACCGCCAGCGACCGTCGNNNTTCNNCNNNNNGGAACATTGTTCCATCAAATTGGCAATTTGGTCAAACTTTCACTGGAAAGAACTTCCGTGTCTGAACACCCCCTTTACTTTCTTAAGATATATAAAATACAAGTTTATTTTCTTTTTGTTTGGGTTCCCACCATTTATCTATTTCCTGATCTTTTTTACTGCAGAGGAA
GmaAffx.81362.1.S1_at	BF324988	At4g17030	6e-41	Cell Structure			AGTACCAACTTAGCCTTTTCTGTGTCACACTGCTCTTACCTGCCCTGTGTACCTCTCAAGACTCTTTTACGTGCTCCAGAGCAACCTATTATGGTAGCCCAGATTGTTATGGAAATCCAAGGGGAGCTTGTGGCTTTGGAGAATATGGAAAAACGGTAAACGATGGTAGTGTCGCAGGCGTGTCTTGGCTATGGAAGAATGGATCTGGCTGTGGAGCATGTTATCAGGTTAGGTGCAAAATACCACAATTCTGCGATGAGAATGGAGCATACGTGGTGGTTACAGATT
Gma.3716.1.S1_at	BI968899	At5g64030	0	Cell Structure			GGATTCTTAGGCCTGAAGGAAAACTTATTGTTCGNGANACTGTNGAGATCNTTGAAGAGCTTGAGAGCATGGCTAGGTCTATGCANTGGAAGGTTCGCATGACTTACTCCAAGGATAAGGAGGGNTTGTTATGTGTGGAGAAGTCCAAGTGGCGACCTAAGGAGCAGGAAAAGCTCGAGTATGCTATTGCTTAAGCATGGAGATGAGATGCCAAAATTCTTGGNTTTTTTGGCTACTCGAAATTCCTGTTTAACTGTACTTCCACTGAGTCATATGTATCATGTTAGTTAGGAATATCTATGTATTCTTTTTTCCTGTTGGGTATTAATTTTGATATCCTTTATTTATATTTATTAAATTGGTGACCTCTGTTGTAACATGGTGCCATAGCGTGAAGGAA
Gma.3604.4.S1_s_at	BI317410	At4g34050	1e-51	Cell Structure			TCACAAAAGTCTCCTTCAGAGCGATGCACTCTATCAGTATATACTTGAAACCAGTGTGTACCCAAGAGAGCATGAGAGCTTGAAGGAGCTAAGAGAGTTGACGGAAAAACACCCTTGGAACCTGATGGCTACACCACCTGACGAAGGACAACTTCTAGGCATGCTACTTAAGCTTATCAATGCCAAGAACACCATGGAAATAGGCGTCTTCACTGGTTACTCCTTGCTTT
Gma.4001.1.S1_at	BI424053	At1g05570	1e-117	Cell Structure			TTGTCATTTTGATTGCTCTTCCGCATATGACAGTGCAGGACATTGTTGTTTGCATTCTTGCTTTCATGCCAACTGGTTGGGGAATGCTGCAGATTGCTCAAGCATTAAAACCTGTAGTACGCCGGGCTGGGTTTTGGGGATCAGTGAAAACTCTTGCTCGAGGTTATGAGATTGTCATGGGTTTGCTATTGTTCACTCCTGTTGCTTTTCTGGCTTGGTTTCCATTTGTTTCAGAATTTCAAACCCGTATGCTGTTCAACCAAGCATTCAGCAGAGGTTTGCAAATTTCTCGTATTCTTGGTGGCCAAAGGAAGGAACGCTCTTCTCGCAACAAAGAATAGGTTGTNTAACTCTGAAGGNTTNNAATTATTAGGAGNCCNAAATTCTTGGTTGCCNTAA…
Gma.6130.1.S1_at	CD409089	At1g05570	1e-83	Cell Structure			GGACATAATAGTCTGCATTCTTGCAGTCATGCCAACNGGCTGGGGAATNCTGCTGATTGCACAAGCTTGCAAGCCTCTCATTNAAAAAACTNGGTTTTGGGGGTCTGTTCGAGCACTTGCNCGCGGATATGAAGTAATAATGGGCTTGCTTCTCTTCACACCAGTTGCTTTCTTGGCATGGTTCCCATTTGTTTCAGAGTTTCAAACCAGAATGCTTTTCAACCAAGCTTTCAGCAGAGGTTTGCAGATTTCTCGTATTCTTGGTGGACAAAGAAGTGAACGCTCCTCCAACCACAAAGAGTGACACTGAAGTTTCATTTTCATCTGTTATCTTTATTATCAAACGTTTCAACCACGTGTGGTTGCATTATTATAAGAGTTTCATATATTCTTTAAATG…
Gma.33.1.S1_at	U03860.1	At1g65680	2e-87	Cell Structure			GAATGCAACTATCCCGGTAGGTCAATAGCTTTCCACGTGGATTCTGGCTCAAACCAAGAATATTTTGCTACCTTGGTTGAATATGAGGATGGGGATGGTGACCTTGCCAAGGTTGAACTCAAGGAAGCACTTGATTCAGGGTCATGGGATTCCATGCAACAATCATGGGGTGCAGTTTGGAAATTTGACAAGGGCTCACCACTGAGAGCACCATTCTCTATCAAGCTAACCACACTTGAGTCTGGCCAGACCATTGTGGCCAACAATGTGATCCCTGCAGGGTGGACTCCTGGTCAGACTTACAGATCGATTGTGAATTTTGCAACCTAAGGATGTGTCCATCATTTTGCATCACCAGCTTGTAGCTA
Gma.2424.2.S1_a_at	BM524046	At3g15580	5e-23	Cell Structure			TATACCTTGGAACAAAGGCTCGGAGAATCGCGGGATATTGTGGCCAAATATCCCGATCGAGTCCCCGTAAGCCTCCTTCTTCATCCTAATCATCTTCTCCTTTTTTCTTTATATATATTTTAAAATATTTGTTTTAATAATTCTCTTTTTAATCTCGCTTTGTGGATGGATCCTTATAGCTCTCTTGATCCTTGCACTCTACTGTTTATAACGAACGATTCGATTCATGTGCCAAATATATAGAACTAGAACCACACGGTAACGGTAAACATGCTTTCCGTAACCCTAAATTGGTCATTTTATGATTCGATTCTTCTTCTTTACCTTCTGCAGGTGATTGTGGAAAGATATGCGAAATGCGATCTGCCTGAGTTGGAGAAGAAAAAATACCTTGTTCCT…
Gma.13293.1.S1_at	CD392693	At1g68725	0.008	Cell Structure			GCTCCCTCTGGCAAAGAAGGTGCGTTCTCCATTTGGTATGCTTGGATGAGAGCTGCAGGGCTGTGCGTGGGGTTCACGGTGGGGTCGGTCGCGCCGGGACGAGTTAGGACCTCGTTTGGAGTTGCGTTTTGCACTGCCATTGCTGGAATTGTGGTACTGCTTTTCGGGAACATCAGTGATGTTGGTGGTGCTGTTGCTGCGGGGCACGTTAGAGATGAATGCGAGAGAAGTTCGGCTGTGCTGCCTGGCTTGGATTCTAAGGAATCTGCACGCGTTTGAATAATGGAAACTGGAAAATGAAGAAGATTATTATTGTTGTTGTCTTGTGGGTCATATGATTCTTTGCAAAATGATGTTAATGCATGCAAGAGTAGTATTATAAGGTTTCTTTTTATGATT…
GmaAffx.494.1.S1_at	AI938330	At5g24090	2e-42	Cell Structure			GATGCTCACTTGGATAGAGCCATCCAAACTGGGCTTTTTGACTATGTGTGGGTTCAATTCTACAACAACCCTTCATGCCAATACTCCAGTGGAAACACCAACAATTTGATCAATTCATGGAACCAATGGATCACAGTGCCAGCTTCTCAAATCTTCATGGGGCTTCCTGCATCTGAGGCAGCTGCTCCAAGTGGTGGCTTTGTGCCCGCTGATGTGTTGACTTCTCAGGTTCTTCCTGTGATTAAACAGTCTTCAAAGTATGGTGGAGTCATGCTCTGGAACAGATTCAATGATGTCCAAAATGGTTATAGTAATGCTATTATTGGAAGTGTTTAATCATGCTATAGACTTATAGAAAAACTATGTCATTAATTCCATT
Gma.1277.3.A1_s_at	AW394783	At5g59370	4e-22	Cell Structure			CTAACTTTTGTTACTCATTCACGTTATTCTCTGGAGTGGTGATTTGGA
Gma.16111.1.A1_at	CD407204	At5g59370	1e-27	Cell Structure			ACAGGAAATGCTTCTGAATGTTGCAAGGTGGCTTGGTGAAAGAAAATACGGTGTCCTCGTTTTATATGATAAAAATGTGTTGTTAAATCAGTTGACTGAATTGATGACAGTAAATTCTTTCATTTGTTTTTGTTCTATTATTGGCAATTGTTCAACAGATC
Gma.4270.1.S1_s_at	CF920385	At3g46010	2e-64	Cell Structure			TTTTGTCACTGAAGAGAATTGCCAAAAGAGCAGAATTTTCTTCATTGCTTGGTCCCCTGATACATCTAGGGTTAGGAGCAAGATGATTTATGCCAGCTCCAAAGATAGATTCAAGAGGGAGCTTGATGGAATTCAGATTGAGCTGCAAGCAACTGATCCTACTGAGATGGGTCTTGATGTGTTCAAAAGCCGTGCCAATTAAATGATTCCGATTATTCATAAATAGGAGTTGTGATGGGGATGGTCAACTTGGCTAATTTGGACTCAATTTTCCAAGTTTTGACATGAGGTCTATNGCAGCTTCAACAAAGCTTCTCTTGTTCCAGTGTATCTTGTGGTTTGNGACATATAACCCGTGTTTGGGTGTNATCTTAGNCCTATTCCTANTAGTTAATTTTG…
Gma.597.1.S1_s_at	AI443313	At2g16700	1e-57	Cell Structure			TATAGTCCAATGACTGTATGACATGNGCTNTNTCTNCTTCTTTCTTGTTTTTATGCTAGTTTAATTGTGTTCGATGTAAGTGGGGCATCTAATCTTCAATCCTTAAGTCATAATATTAAGTTATGTGTAATATATGACTGTCGGGTGTATGATAAGTTAAGGGCAACAAACTTTGGTTGCAATCTCTTTAATGATGAAAATTTGTGGAAAAGAATGGATTAGCTCAACTTTTCCC
Gma.1541.1.S1_at	BE657337	At2g31200	4e-40	Cell Structure			CCTTGCCTGAAAATGATTGCCGATANGCTNTCTTTGACTTTGATTTTGTGACATCTGAGAACTGCCAAAAGAGCAAAATCTTTTTTATTGCATGGTCTCCTTCNNGTNGCCCNGCATTNCGCCCNNNAAGATGCTATATGCAACATCCAAGGACAGGTTCAGAAGGGAGCTGCAGGGCATCCATTATGAGATTCAGGCAACAGACCCAACNGAGATGGATCTTGAAGTCCTCAGAGANCGTGCAAACTGAGCANNNNCCTACACAAGAGGNTTGTGTCTAGGTGATGTAGTTANNATATCTGAGGCCTCAGGGAATGATGTTGACTGATNNNACCCTTTAGTTNTTCTACTATGATCNCTGTCTGTTTCGNNACNTATTTCTCNTAAATNAGCTGACTT…
Gma.5989.2.S1_a_at	BU965260	At2g17390	4e-41	Cell Structure			CTGCTCAATGATCCAAGTATCAAGGAATTGGCTGAACAGATAGCAAAAGATCCATCATTCAACCAGATGGCTGAGCAGCTTCAGAAAACTTTTCAAGGAGCTCCACAGGATGCTATGCCTAGCTTTGATAATCAACAATATTTTTCAACCATGCAACAGGNTATGCAGAATCCTAATTTTATGACCATGGCTGAGCGCCTGGGTAATGCATTGATGCAGGATCCATCTATGTCTGCCATGCTTGAAAGTTTTTCTAATCCATCAAATAAAGACCAGCTTG
GmaAffx.6454.1.S1_at	BQ740636	At3g04710	1e-33	Cell Structure			AAGGAGCGGCTCTGCGTTTGTTGCAGAAATTTGATGAAGCTGCAAATGCTTTTTATGAGGGAGTAACGCTTGATCCTGAAAATAAGGAGCTTGTAAATGCGTTCAGGGAAGCTGTCGAGGCTGGGAGGAAATTTCATGGAACGGCTGAAAATAAATCATAGTTTAGCCTTTTGTTAATACCATGTTTCAGAGAGAAGAGATCAAAATATTGCGGGTGGTGCAGCCTTATTCACTTGATCCTTTTTTCCCCAATGTGTGTGTGCGTGTTTTCTTTAACTAGTTACTGTCGTATAGGAAGAGTCAGCTAGTAATCTGTTTCATTAAATTGTTTTAGTAATTATAAAGGTTATGCTTATTTGACATGTTCCAAAATTGTTGCAGAATTAGTACACATTATGA…
Gma.5675.1.S1_a_at	BE822313	At5g07840	1e-61	Cell Structure			TCAGTGATAGCAGATTTAACCCACCGCTTCATTACTGTCCCGGGCTGGAATGGGCCTACGAGGAGATGAAGCGACTTCGTCAAGAAGATTTGTCTGCTGGAGAGACATCTTACAGCTCCGAAAGTTAATTTGCTTTTCAGGGACTTGGTTGGTGTTTGATAGTGTGTGTTTGGATGCCGTTCAGAGGAGATCAATGTGTGTCAGATCAGAGTTAATATGACTAGCTTCTGCGTCACCTTTATAAATTTGACATGAAAATTTGTTGATATGTGCATTCAGAAAGCGTATCCAGACATGCA
Gma.5675.1.S1_at	BE822313	At5g07840	1e-61	Cell Structure			GGAGGGATGCTGTGAAATTCTTGTTAGAGAATGGAGCCTTCATGCCACCTGATATCAGTGATAGCAGATTTAACCCACCGCTTCATTACTGTCCCGGGCTGGAATGGGCCTACGAGGAGATGAAGCGACTTCGTCAAGAAGATTTGTCTGCTGGAGAGACATCTTACAGCTCCGAAAGTTAATTTGCTTTTCAGGGACTTGGTTGGTGTTTGATAGTGTGTGTTTGGATGCCGTTCAGAGGAGATCAATGTGTGTCAGATCAGAGTTAATATGACTAGCTTCTGCGTCACCTTTATAAATTTGACATGAAAATTTGTTGATATGTGCATTCAGAAAGCGTATCCAGACATGCACTGAATCTGTATTGTGGGAATAAATGTAGAATTGAAATAAAACAAT…
Gma.3578.1.S1_s_at	AW156522	At3g48990	0	Disease & Defense			TTCATTACCGATTCTTTGCCCAAGACTGCCACCGGAAAGATTTTGCGTCGTCTTGTGGCAGAACACTTTGTCTCTCAAATTTGAGCAACTCAAGTCCTACATTTGAAGACTCTATACCTGGCCATACATAGTTGGAGTCCACACACCATAAATTTCAACAGTAGTTTGGCAACTTGGCATTTAGGAGGAGGATATTTCTGCAAATGGTCTTTCATACAGGATACAGTATATTGTAGTTTTCAATGATTCATGTGAAATGTTCACAGTGTAATGTTTTCAAGGT
Gma.7423.1.S1_a_at	BU547609	At3g48990	4e-28	Disease & Defense			TGCTGTTCTTCTTTCACATCCAGAAATTGCTCAAGCAGTTGCTTNNNGAGTGCCTGATGCCAAGTNNNGAGAGGAGGTATAATTTATTTTTGGTTTTTACACAAATGTGCTCAAAAGTTGAGTAAATGACCATTNNNTNTTAGTTCTNTGAAGTNNNTATTCATCATATCTTTTTTAACTNNNGATAGATATATTGTGCTGTCATCCCAAGAGAAGGATCAAACGTTGATGAGGCAGAGGTGCTAAGATTTAGCAAGACCAATCTTGCATCCTTCAAAGTACCAAAAAAGGTCTTCATTACTGATTCTTTACCCAAAACTGCCACAGGCAAGATTNTGCGCCGTCTTGTGGCAGAACACTTTGTCTCTCAAATTTGAGCAACTCAAATCCCCAGTC
Gma.7423.2.S1_a_at	BG046270	At3g48990	1e-139	Disease & Defense			GCTGTTCTTCTTTCACATCCAGAAATTGCTCAAGCAGTTGCTTTTGGAGTGCCTGATGCCAAGTATGGAGAGGAGATATATTGTGCTGTCATCCCAAGAGAAGGATCAAACGTTGATGAGGCAGAGGTGCTAAGATTTAGCAAGACCAATCTTGCATCCTTCAAAGTACCAAAAAAGGTCTTCATTACTGATTCTTTACCCAAAACTGCCACAGGCAAGATTTTGCGCCGTCTTGTGGCAGAACACTTTGTCTCTCAAATTTGAGCAACTCAAATCCCCAGTCTTTTGATGCTTACATATATGCCTGGGCAAAAATGATCTTTCCTACAGGATACAA
Gma.4362.1.S1_a_at	CD405619	At3g11630	1e-107	Disease & Defense			GACGAGACAAAGAGAACTCTCCAGGCCTTACAGTATGTGCAGGAGAACCCAGATGAAGTTTGCCCTGCTGGGTGGAAGCCTGGGGAGAAGTCCATGAAACCAGACCCTAAACTTAGCAAAGACTACTTTGCAGCGGTGTAGCTAGGATA
Gma.1190.1.S1_at	AF279267.1	At1g51680	0	Disease & Defense			TGAAAGGATATCTAAATGACCCAGAGGCTACAGAGAGAACTNTAGACANAGAAGGATGGTTACACACAGGAGATATTGGTTTCATTGATGATGATNATGAACTCTTCATTGTTGATCGGTTNAAAGGNAATTGATCAAATACAAAGGATTCCAAGTNGCTCCTGCTGAGCTNGAAGCNTTGTTGATTGCNCACCCAAACATTTCTGATGCTGCCGTTGTAGGNATGAAAGATGAAGCTGCAGGNGAAATTCCAGTTGCATTTGTTGTAAGGTCAAATGGTTCTGAGATNNCCGAGGATGAAATNAAGANATACATTTCACAACAGGTGGTNTTTTACAAGAGAATAGGTAGAGTTTTCTTCACGGACTCTATTCCTAAAGCACCCTCNGGCAAAATTCT…
Gma.8394.1.S1_at	CD392332	At5g62740	1e-111	Disease & Defense			CAAGTCTTCTGCTGTGTTTATTCCACATGGACCTGGTGCTGTTCGTGATGTAGCTAGTCAAATTCGAGACGGACTTCTTCAGGCTTCTCATCAGTAGCCTCTACTCCACCTAGATCTTGTATTTGGTTTGTATGGGAGTATGTTTGAAGCTATAGCGCCTGTGGTTGTATACCTGTATTTCTGTGCAGTGTGTTTTGTGATTTTGTTTTAGAATAAACTGCAAAATTGATCTTCCAAAGATTATGGCATCACCTCATTAATGTTTTTAAGATTTTTGTTATCAAATTAGTCCCACAAATATCTAAAATGTTACCACATTTGTTCACATAGAGGACTAAAGAAGTGGTAACACAAAATAATTTAGTATTTGATTTGTATCTCTGTGGGATTGATTTGTNG…
Gma.6999.2.S1_s_at	X60043.1	At1g24020	1e-07	Disease & Defense			TCACTGTCAAATACGAAACAAAAGGAGATGCTGAGCCCAACCAAGACGAACTCAAAACTGGAAAAGCCAAGGCTGATGCTCTCTTCAAGGCCATTGAGGCTTACCTTTTGGCCCATCCCGATTACAACTAATCCTCTTCAACTTACTTGT
GmaAffx.91442.1.S1_at	CF805736	At1g24020	3e-08	Disease & Defense			GGATATAGCTACAGCGTAGTGGGTGGTGCTGCGTTGCCAGACACAGCGGAGAAGATCACATTCCACTCCAAATTGGCTGCTGGTCCCAATGGAGGCTCTGCTGGCAAGCTCACTGTCGAATACCAAACC
GmaAffx.9145.1.S1_s_at	BU763814	At1g24020	4e-06	Disease & Defense			TCACAACCTTTACACAGGAATACTCCTCCTCTGTTGCCCCATCACGCATGTTCAAGGCCTTGATTGTAGACTCCAGAAATT
GmaAffx.59573.1.S1_at	AW350986	At1g13900	2e-42	Disease & Defense			GAGGCTGTAGTATTGCTGATGCTAATTCTAAAGCTGGAAATGTGATTGTGGAATCCACATTGTCTTGGTATGTCAAGGGAGGAAGTGTGCTGCTGCTTGGTGCATTCATGGGTTACGTTTTTGGTTACGTTACAAGTGCAAGGAAGAAGTCTGAGGTGCCAGAGAGCAATTGGACTCCGGTGAAGACTGAGGAAACTTGAACTGTAGAGGAAACTT
GmaAffx.90134.1.S1_s_at	CF805859	At5g34850	8e-77	Disease & Defense			GAGGGTGAAAGCATGCGATCTGTTTTTGAGAGCTGGTTCATCGAGTACAAAGTTGATGTGATCTTTGCTGGCCATGTCCATGCTTATGAAAGATCATATCGATACTCTAATGTTGACTACAACATAACAGGCGGTAACAGGTATCCATTACCTAACAAATCAGCACCTGTTTACATAACAGTCGGAGATGGTGGAAATCAAGAAGGTCTTGCTTCAAGGTTTTTGGATCCACAGCCAGAATATTCTGCTTTTCGAGAAGCAAGCTACGGACATTCCACACTGGAGATAAAAAATAGGACCCATGCTATCTACCACTGGAATCGCAATGATGATGGCA
Gma.11154.1.S1_a_at	AW309927	At1g63220	5e-44	Disease & Defense			TGATTCTCACATACAGGGCACAGGAGAAAAAGAGCACTGTGCAAGAAGATGCTGGATCCAAGCCACAATGGAATGAGAGCTTTCTTTTCACTGTCTCTGACAGTGCATCTGAACTTAATCTAAAGATAATGGATAAAGACAACTTTAGTCAAGATGATTGTCT
Gma.11154.1.S1_s_at	AW309927	At1g63220	5e-44	Disease & Defense			TTGGCGTGGCAACCATTCATCTGGATCCAGTGTTTGAAGCGGGTAGTATTCCAGAAACTGCTTACAAGGTTGTGAAGGACGAAGAATATTGTGGAGAGATTAAGGTGGCTCTCACTTTTACTGTTGAGAAAAATGAGGAGCAGGATTATGCTGAACCTGAAGAGAGCTATGGTGGATGGAAAGAATCCAGTGGGGAATTTTAAAGTGAAAGAAGTATTTACATACTTCCATGGCCAGAATTACCCTTATAATGAAAAATAAGCAGTTTTGGGGTACTTTTTGAGAATTTCCATTATTGTGTTTTCTGGTGTGAAGCAATGGTGTTGTGCTGTTAGGTTGCTTTC
GmaAffx.89705.1.S1_s_at	CK606718	At1g76180	1e-11	Disease & Defense			TAATCGATCATCACTTCACTTCACTAATACATCATGGCAGACGAGACCCAGAACAAGTATGAGAGCTCTGAGGTTGAGGTCCAGGATCGTGGTGTTTTTGACTTTCTCGGTAAGAAAAAGGATGAAGAAGACAAGCCTCATCCTCAGGAGGAGGTCATCGCCACCGAGTTTCAAAAAGTCACTGTCTCAGACCAAGGAGAGAACAAGCACAGCCTCTTAGAAAAGCTTCACCGATCTGACAGCAG
GmaAffx.84858.1.S1_at	CA853434	At4g33300	1e-132	Disease & Defense			AACTGCCACAGTTTGAGTCAACTACCTGTTGAATTTGGCAAACTAAGATCACTAGAGATCCTCCGTTTATATGCTTGTCCATATCTAGAAACACTTCCTCCTANCATGTGTGACATGAAGAGATTGAAGTATATTGATATTTCTCAATGTGTTAACCTCACATGCTTCCCTGAAGAGATTGGTAGATTAGNANGCTTAGAGAAGATTGACATGAGGGAATGCCCCATGATTAGGTATTTACCGAAGTCTGCAGTGTCATTGCAATCTCTGCAGCTTGTAATTTGTGATGAGGAGGTACAAGATATGTGGAGTGATGTTGAGATGTCCAACTCAAATGTTCTTATTCAAGTAGCAGAACAACACTATGATCTAGACTGGCTTCAAGAGTGACCCATGTGT…
GmaAffx.93392.1.S1_s_at	CF807760	At5g42500	6e-42	Disease & Defense			CACTGGGGCTTTTCGTTTTGCACGTGGCTACGCTCAAGCCAGATTTTACTCTGTTGATTTCACCAAAGGAGACGCTATCGTGGAATACGACGTATTCGTGAACCATTATTGAGATTTACTCCTTCCGTTTCGCAATAGTTACGGAGAATT
Gma.2102.1.S1_s_at	BM523392	At2g28670	8e-37	Disease & Defense			AGGGATTTTACATTGCCAGCGCTGTCGATGGAGCAAGTCAGCTTATGGCTTTCACCGCTAAGTTTGAAGAGAATGGTTACGTGGACAGTCTTAGTTTCTTTGGCGTTCATCTAACGCAGGTTTCGGAGTCTCAAATTGCCATCGTTGGAGGCACCGGAAAGTTTCTCAACGCAGAAGGCTTTGCCATTATTAAGACTTTTCCTGTTATCGGCGGTCAGCAACATAACACTGACGGTGTCCAGACTCTGTTGCAGCTCACTGCCTATCTGGCATACTAGCCTCTCTCTCTCTCTCTCTCTCTCTTATATGCTGTGCTG
Gma.5950.1.S1_s_at	BQ610563	At5g49040	4e-41	Disease & Defense			TTGTACGCGGGCACCTCACAATCGGAGTTCAATTTATTGATTGTTGTGAATTTTGCCTTGACCGAAGGAAAGTATAATGGCAGCACCATCACCGTGGTGGGGCGGAACCGCCTCTCCCTCAAGATTAGGGAGATGCCTGTGATTGGAGGAAGTGGGGTTTTTAAATTTGCCACTGGGTATGTTGAAACCAGCACTCTCTATGTTGATGCTGATAGGTCTACCATTGANNNNAACATTTATGTTTCACATTACTGATCAATTTGTGGTAACTTTATGTTACAAAACTTCTTCTATGTTCCCTTACGTACTGCTATGATTAATTGGGTATGCGGTGTTTTACATATATA
Gma.2840.1.S1_s_at	CD404417	At3g12490	1e-35	Disease & Defense			GTGGTTTCTGGTACCTTGTACACCATCACTTTGGAGGCAAAAGATGGTGGGCAAAAGAAGGTTTATGAAGCCAAAGTTTGGGAGAAGNCATGGTTGAACTTCAAGGAGGTGCAAGAGTTCAAGCTTGTTGGAGATGCACCTGC
Gma.3081.1.S1_at	D31700.1	At3g12490	1e-71	Disease & Defense			ATCCAGCAAAGGTCTAATTCACTAGTACCCTATGAGCTTCATGAGGTTGCTGATGCAAAGGCTGAGGTCATTGATGACTTTGCCAAGTTTAATCTGCTTCTCAAAGTCAAGAGGGGACAGAAGGAAGAGAAGTTCAAGGTAGAGGTACATAAGAATAACCAAGGTGGGTTCCATCTAAATCAGATGGAACAAGATCATTCCTAATTCTGATNNGAAGTTTGGCCACGCTAGCAGTATAGGCCTGGGTGGCACCTAAAATATACCTTTTTTTTTNCAGTGGGGTGTATGAATCTTATTATCTATGCTATACATAATTATATACTAATNGGGTATTGTTCTTATCTCTGTCTCAGCAAGTATGTTAGTGCTTACCCCTTTCTCTAAGCCTTGGCAGATAAG…
Gma.13182.1.S1_at	CD392298	At2g33740	7e-43	Disease & Defense			ATTGTTGTCTATGTCACTGTTCCCAACAAAGANGCAGGTAAGAAGTTGGCTGAAAGCATCGTCAAAGAGAAGCTTGCTGCTTGTGTCAACAGGGTACCGGGTATTGAATCGGTGTACCAGTGGGAGGGAAAGATCCAAACTGATTCTGAGGAACTTCTTATNATCAAGACTAGGCAATCCCTTCTGGAGGCANTGACAGAGCATGTCAANNCTAATCATGAATANGATGTGCCAGAGGTGATCTCCTTACCCATCAC
GmaAffx.89772.10.S1_s_at	CK606097		1.1e-53	Disease & Defense			AGGCTCTTGATTCCTTCAAGAGTGTTGAAAACGTTGAGGGAAATGGTGGCCCNGGAACNATCAAGAAGATNACTTTCNTTGAGGATGGAGAAACCAAGTTTGTNCTGCACAANATAGAANGCNNTTGATGAGGCNAACTTGGGATANAGCTACAGCGTNGTNGGNGGTGCTGCNTTGCCAGACACNGCGGAGAAGATCACATTCNACTCCAAATTGGNTGCTGGTCCCAATGGAGGNTCTGCTGGNAAGCTCACTGTCNAATACNAAACNAAAGGAGATGCTNAGCCCAACCAAGACNAACTCAAAACTGGAAAAGCCAAGGCTGATGCTCTCTTCAAGGCCA
GmaAffx.91519.1.S1_s_at	CF807244	At1g29850	5e-24	Disease & Defense			TGAGTTGGAAGCAATCAGACAGAGAAGGTTGCAGGAGCTTATGGCTAGCCATGGTGGCGGAAATCAACAGAACCCTGAACAGGAGAAAGCTCAGGATGATGCAAAGAGGGAGGCTGAGGAACGGAGACAGATGATGCTTAGTCAGATATTGGCTGCTGAAGCGCGAGAAAGGCTTGCTCGAATTGCTTTGGTGA
Gma.15938.1.S1_s_at	CD405157	At5g41010	2e-21	Disease & Defense			AGCGATGGATCCTCAGCCTGAGCCAGTNAGCTACATNTGCGGAGATTGTGGAATGGAGAATACGCTGAAGCCNGGTGACGTTATACAGTGCCGTGAGTGCGGTTACCGTATNCTTTACAAGAAGCGCACTCGTCGCATTGTCCANTACGAGGCACGCTGAAGAAAACTGCT
Gma.6315.1.S1_at	BE822317	At5g26990	2e-58	Disease & Defense			TATGTCCTGTTTGTGCGTTGAGGGTGGGGGTTGATATGGTAGCACATATAACCCTACAACATGGGAGTATATTTAAGATGCAGCGCAAGAGGNAATCACGGAAAGGTGGATCTTATTCAACACTATCTTTATTGAGGANNGAACTGCGAGAAGGAAATTTACAATCCCTTTTTGGCGGATCTTCATGTATAGTGTCCTCATCCAATGCAGATCCACTGTTGTCATCATTTATATTGCCTTTAGCGAATGAACATGCCAGCTCTCAGCCTCACTTACACACTGAGACAAGATCATCTAAAAAATGCTCAGATGAGACTGTATCAACAAGAAATGTGGAGACATCAACCTTGTCAGTTAAGGATAAGGAGGAGAAGGCAAAAAGATGCGAGTTTGTTCAAG…
GmaAffx.76142.1.S1_at	BE022388	At2g40000	2e-06	Disease & Defense			TGCCAAGACCTTTCTCGCTTATTATTGGGAAAATAATAATCAAAATGTGGTTCCCTGCTAGTTAATTAAAAAATTAATCAATTAATTCCTAGTCATATATACTTACTCACACAAACGGGAAA
Gma.7903.1.A1_at	BG653026	At5g25270	0.0003	Disease & Defense			GTGATATCTCAACAAGTAGGGTCTGAGGGAAATCCTTCAGAAGATCATATGGCTCAAGATTCTTCAACCCAGGTTGAAACTGATGTCGGGACATCACGCAGACAGAGTGATTCTGATCCAAGCCCCCCAAATGCANAACGNCAAAAGATGGAGTGATATAGAGGATAATGTTAAGTTTGCGGTCGTGGAAGATTGTGATCGTAAGAAACAGAATTCGGGGTGGATCTCATGATGTCAATTTGGTATTATGTGCTTACGTAGTTTTCTATATCAAGCGTGATTTCATTTTCTCCTGCTGTAGACAAACCTTAAGAAGACTGCTCTCCGAATGTGACATTTTGTACATCATTGGCATTGGAATTGAGCTTCCCTTAAGTTCAGTTTATGCTTGGAATTGGT…
GmaAffx.666.1.S1_at	BM143164	At1g03230	7e-29	Disease & Defense			ACAGAGCCTAGAATGTCGTTCGTTAAAGCTTCAATTGTTATCGGTGGATATCAGTTGGAGGACAATCTTTTGGAGTTTGATGTGGCTTCCTCCAAATTAAGCTTCAGCTCATCGCTGTTGCTCCACAATGCCACATGTTCACGTACTTGAATGTCATAGCCTTATAGCCTTATTACGTGTTGAAATTAGCCACTTTCAATTATCTAGTAGCTTCTATATCTTTCAA
Gma.6999.1.S1_s_at	AF529303.1		3.1e-56	Disease & Defense			TCACTGTCAAATACGAAACAAAAGGAGANNNNGNGCCNNANNCNNNACGANNTCAAAACTGGAAAAGCCAAGGCTGATGCTCTCTTCAAGGCCATTGAGGCTTACCTTTTGGCCCATCCCGATTACAACTAATCCTCTTCAACTTACTTGT
Gma.6999.1.S1_x_at	AF529303.1		3.1e-56	Disease & Defense			ATAGAAAGCATTGCCAGACACGGCGGAGGGTCTGCTGGGAAGCTCACTGTCAAATACGAAACAAAAGGAGANNNNGNGCCNNANNCNNNACGANNTCAAAACTGGAAAAGCCAAGGCTGATGCTCTCTTCAAGGCCATTGAGGCTTACCTTTTGGCCCATCCCGATTACAACTAATCCTCTTCAACTTACTTGTTATCACTTTCTTGCTTTTTCTTGCTTGGA
Gma.7301.1.S1_at	BM528250	At4g29210	2e-71	Disease & Defense			CCATGACTCCTCTTATTGTCACAAAGGATGATCAGTTGGTTGGGGTACTTGGAGGGAGCGGTGGAATGAACATTATTGCAGCTGTAGTTCAAGTCTTTCTTAATCATTTCATCTTGGGAATGAAACCCTTGGATGCAGTTGTGAGCCCAAGGATCTATCACAAGCTAATACCAAATGTAGTTCGTTATGAGAACTTGACTGCTCATAATGGCGATCACATTGAGCTTTCAAAAGAAAGTAGGCTTTTCCTAGAAGAGAGAGGTCATCAACTGAGAGGTTCTGAAGCACTAGCTGTGACTCAGCTTATTGTGCAAACTCTTAAAACGCCTATGAACTTCAATAGGAAAGTTGGTGAAAACACCAAATCACTTACAAAGCATGGCACTCTAACAGCAGTAA…
Gma.6847.1.A1_at	CA853003	At5g15870	5e-60	Disease & Defense			GGTAGTTGGTGTTCTTTGGGCTAATAAGAGGGACAGTGGACTATGGTTTGCACCTNNNGAGTGGAGAGAATGTAGGCTTGGCATTCAACTCTTACCGATACTGCCTATCTCTGAGGTCTTGTTTTCCAATGTTGATTTTGTGAAGGAGCTTGTGGAGTGGACATTGCCTGCTTTGAATAGGGAAGGTGTTGGAGAAGGATGGAAGGGGTTTGTCTATGCTCTGCAGGGTATTTATGACNATGAAGGTGCAATGCAGAAGATAAGAAGCTTAAATGGATTTGATGATGGAAACTCATTGACTAATCTCTTGTGGTGGATTCACAGCAGATCTGATGACGAGGAATTTGGTCATGGAAAACACTGCTGGTTTGGTCATTACTGCCACTANGTATTGTTAAT…
Gma.3749.1.S1_at	CD392491	At4g24280	6e-43	Disease & Defense			TTACAACCAGCCGGGAGCTGCAGGTGCAGGAGGGCCAACACCACCTGGTGCCGACTCTGGCCCCTCAGAATCCTCAGGTAAGGGACCCGACGGAGATGTCATCGATGCAGATTTCACCGACTCTAAATGAGCAGCAGCCAGCTAATTACACCCATAGAGAGTATATGTTAGTATTTTTTNCCCCGTTATATGTTTTCTTCTGTTCCAAATTCTTAATGATTTTTGTCAATGGAGAGTAGGTGTGTGTTTCCTTCAAAAATTAGACACGGATTTCATAGGTGCTCATTGATGCTCGCTTTGTACCNTGGAATTTTGTCTCAGTAACACTGGTATTATTATGGGTGCAATTCATTTTATA
GmaAffx.88762.1.S1_at	CK606334	At3g09270	9e-53	Disease & Defense			CAAATGGAGCCAAGAATCCCTTAACCACCCTTTTGTGCAAGAAGTC
Gma.4312.1.S1_x_at	BM523337	At2g43350	3e-74	Disease & Defense			GTGGTTTGACACAGACAAATTACAAAGAATTGAATGTATTGTACGAGAAGTACAAGAATCAAGGATTTGAAATCTTGGCATTTCCGTGCAACCAGTTTGCTGGACAGGAACCAGGAAACAATGAAGAAATTCAGGAAGTAGTTTGCACAAGGTTCAAGGCTGAATTTCCTATCTTTGATAAGGTTGAAGTCAATGGGAAGAATGCAGTGCCACTTTACAAGTTTTTAAAGGAGAAGAAAGGGGGAATATTTGGCGATGGTATCAAGTGGAACTTCACAAAGTTCTTAGTAAACAAAGAAGGGAAGGTTGTGGACAGATATGCACCTACCACCTCACCTCTGAAAATCGAGAAAGACATCGAGAAGCTCTTGCAATCTTGAGTACTAAGATTTTATTCTA…
GmaAffx.93342.1.S1_s_at	CF809067	At4g31870	3e-62	Disease & Defense			GTTAATCTCGCCGATTACAAAGGAAAGGTCCTTCTCATTGTCAATGTTGCCTCACAATGCGNGCTTGACTAATTCAAACTACACAGAGCTTAACCAATTGTATGAGAAATACAAAGGGAAAGGACTTGAAATTCTGGCATTCCCATGCAATCAGTTTGGGGCTCAGGAGCCAGGAACTAATGAAGAGATTGTGGAGTTTGCTTGTACTCGCTTCAAAGCTGAGTTTCCCATTTTCGACAAG
Gma.8399.1.S1_at	BU546941	At5g14930	3e-73	Disease & Defense			AGAAGCTATCCTTTCATGCAAAGTGTTGAAGGATGAACAATCTAGTGTGACAGAGAAGGAAGAGGAAACTGGGAAGTTGCTTGAATTCGAGAAGTATGTTTATGGGTTGCTCACGAAATATGAAGTGTCATCAGAGATTTTCCTAAGGCAAAGCAGCTACATGATTTGGTGGAATCAGTATAAGGCAATTAAGGGAACTTCTTATAATTCAGCACTCGCAGACTTCATGAGCAATCCCGATCATTATAATGTGCTGTATATTAAGGGAACTTATAATTTCCCCCCTCAGGCTTAGTGATTAGTGAACGTCCGTGTGGTTGAACAGTGTAAAATAAATTGTGGTTTTATCTCACTGTGCACCTTTTAATAAGCTTTTTTTATATTTTCCCTTGTTGATTT…
Gma.6743.1.S1_at	BE657937	At4g14420	7e-30	Disease & Defense			ATTGTTCCTGGTTGCTCATTATACCCATTTTCCATTTCTCCAGGATTTGNCTTTNGGTNTCTGTCTGGTTCAGAACGAATGTACCTTCTGTCNGATGNATTATGTNTAATTTATAATTANTNNTATATGTATNNTNNTTTTNNGTTTGCNTGACATTANAAACTNTCTTTCGATTACTAAACTTGTATACGAAGAGGGNNAAAAATGATCANAGCCNNTTCATTCAGACTGGGTGTCAATTTCGTTCTGTCCAACGGATTTGATCGAAAGGTGAAGTCTGGCA
Gma.3063.1.S1_s_at	BU549226	At3g09390	9e-09	Disease & Defense			TGAGGTGTTGGAGAGCTAAAGCTTCAAGCAGAAATGGCCCTTAGAAATAATGATAAAAACTATATGTAGTTTCAAAACTTCAAAATTATGTAGTATGTATTATGTTGCACTCTGGTGTTTTGTGTCTAAACAAACACCCTTAGAA
Gma.4305.1.S1_at	AW350687	At1g71695	6e-75	Disease & Defense			GACCAAGACCTTTACACTAATACGAGGACTAAGGGCATTGTCACCGACTTTGCCGTTAACCAGAGCCTCTTCTTTGACAAGTTTGTGTTCGCTATGCTCAAGATGGGTCAGCTTAATGTGCTCACGGGGAATCAAGGGGAGATTCGTGCCAATTGCTCCGTTAGAAATGCCAATAACAAGTCCCTCTTGACTTCTGTGGTGCAAGACGTGGTCGAAACTTTGATAGAAATGTAATGTACGTAACTGGGTCGATAGTGTATGTGTGTTGTATATGTTGTGGTCATGAATAATTGATAAGCCCTTGTTTCTTGTTCCTAGAGGTCTTTTTTGGTGATAAGGAACCATTGTGTAATGGCCCTAGCTAGTTGTACTTCT
Gma.320.1.S1_at	AF019116.1	At1g05260	2e-59	Disease & Defense			GAAGTCGTGATACATTTGATCTTGGATATTACAAACAAGTGGTTAAGAGAAGGGGTTTGTTCCAATCAGATGCTGAATTGCTTACTAGTCCNATCACAAGGTCTATTATCGCTAGTCAACTTCAGTCAACTCAAGGATTCTTTGCGGAATTTGCCAAGTCTATGGAGAAAATGGGACGAATTAATGTCAAGCTTGGANCTGAAGGAGAGAATAAGGAAACATTGTGCACGAGTTAATAACTAAGAATCTCTTTGATAATGAAACCATCTAAGTGCATTTTGTATGTCTACTTTTCTGTGTAACTTATTCTATGCTANGGCCTATGGTGGTCTTGATATATGAGATACCATATGATTTGATTGTTTTTCCAAGTGATGCGAGAAAGGGTTGGGAGTGATT…
GmaAffx.36514.1.S1_at	BE658341	At5g05340	1e-58	Disease & Defense			TTTCTCCAACAAAGGTTTTTCATCTAAAGAACTGGTTGCTCTTTCAGGATCGCACACAATTGGGCAAGCTCAATGTTCAAGTTTCAGAACAAGGATTTACAACGACACCAACATAGATTCCTCTTTTGCAAAATCATTGCAAGGAAATTGCCCTAGCACAGGTGGTGGCAGCACATTGGCCCCTCTTGACACCACCAGCCCAAACACCTTCGACAATGCTTACTTCAAGAACTTGCAGAGCAAAAAGGGTCTCTTGCACTCAGATCAAGAGCTCTTCAANGGAGGATCCACNGACTCTCAAGTAAATTCCTACAGCAGTAATCCTGCAAGTTTCNAAACTGACTTTGCCAATGCAATGATTAAAATGGGGAACCTTAGTCCNCTCACTGGGTCTAGTGG…
GmaAffx.8712.1.S1_s_at	AW349107	At5g05340	1e-118	Disease & Defense			AAGGTGCACAAACTTCAGAGCCCGCATCTACAACGAGANCAACATAGANACCGCATTTGCAAGGACNAGGCANCAAAGCTGCCCNAGAACATCAGGGTCAGGGGACAANAATCTNGCANCNCTTGATCTTCAAACTCCAACCNNNTTNGACAACTACTACTTCAAGAANCTNGTTCAGAAGAAGGGTCTCCTCCACTCTGATCAGCAACTGTTCAANGGTGGGTCCACCGACTCCATTGTGCGTGGCTACAGCACCAACCCGNGCNCCTTCTCCTCTGANTTCGCCGCCGCCATGATCAAGATGGGAGACATTAGTCCTCTCACTGGCTCCAANGGAGAAATCAGGAAGAATTGTAGAAGGATTAACTAATTNNTNATTNAGTCTNNAATATTAAGGGT…
GmaAffx.90443.1.S1_s_at	CF806168	At5g05340	1e-38	Disease & Defense			GAGCAAATTAACTATGGCTTCGTTTTGTTCTAGATTGACAATTTGTTTGGCTCTGTTTGTCCTCATATGGGGGAGTGCCAATGCACAACTTTCTACAAACTTTTACTACCATTCATGTCCAAACCTCTTCTCCTCTGTGAAATCCACAGTGCAATCTGCCATATCTAAGGAGACCCGCATGGGTGCTTCTCTCCTTCGCTTGTTCTTCCACGATTGCTTTGTCAATGGATGTGATGGTTCAATTCTATTGGATGACACATCAAGCTTCACCGGAGAGAAGAACGCAAACCCCAACAGGAACTCTGCTCGTGGAT
GmaAffx.90703.1.A1_at	CF809087	At5g05340	3e-80	Disease & Defense			TTGAGTCTCGAATATTAAGGGTCCTACTACACATACGCAAGCAATTTAATTGTGTTTAATAAGTTGTTAAAACATGTTTTGGTTGTGTTTTGGATTCCGTGGTGGGTTAATTTCCTAGTGTAGTTGCTGTTATCAATGCCGTATACGTTAGTGTGTGTTCTACTTCCCTTTATTTTTGTCTCTTTTTTACTTTTCCTTGACTATATTGTAG
Gma.876.1.S1_at	L78163.1	At5g06720	4e-88	Disease & Defense			AATTTGGACCTGAGCACACCTGATCAATTTGACAACAGATACTACTCCAATCTTCTGCAGCTCAATGGCTTACTTCAGAGTGACCAAGAACTTTTCTCCACTCCTGGTGCTGATACCATTCCCATTGTCAATAGCTTCAGCAGTAACCAGAATACTTTCTTTTCCAACTTTAGAGTTTCAATGATAAAAATGGGTAATATTGGAGTGCTGACTGGGGATGAAGGAGAAATTCGCTTGCAATGTAATTTTGTGAATGGAGACTCGTTTGGATTAGCTAGTGTGGCGTCCAAAGATGCTAAACAAAAGCTTGTTGCTCAATCTAAATAAACCAATAATTAATGGGGATGTGCATGCTAGCTAGCATGTAAAGGCAAATTAGGTTGTAAACCTCTTTGCTAG…
GmaAffx.91141.1.S1_at	CF806866	At5g06730	2e-63	Disease & Defense			TGCCATTGTCAATAGTTTCGGTAGTAATCAAACTCTTTTCTATGAACATTTTAAGGTGTCAATGATAAAAATGAGCATCATTGAAGTGCTAACGGGGTCACAAGGAGAAATTCGAAAACATTGTAACTTTGTCAATGGGGATTCTTCTAATCTGGCTACTCTAGCCACCAAAAAATCTTCAGAGGATGGTATGGTGAGCTCAATCTAGATGAGTTAACAAAAGATATCCTAATGCAAAAATGAAAGGTCATTAATAAAGGGGTTATATAGGAAGATACATGTTGTGTGCTAATGGTGAATCATAATATCGTTTGTACCTTGTATTAGCTACGGATAACAACTACTTATTTTGTAATATATTATTATTAGAATTAAGTTGTTTGGTGTTGATGGGTTT
Gma.17993.1.S1_s_at	BQ628525	At4g11650	2e-79	Disease & Defense			TGGACTTTAGTCCAACCTCGAATGGATGCACACGTGGCATAAGNTGCACTGCGGACATTAACGGACAGTGCCCTAGTGAGCTAAAGACTCAAGGAGGTTGCAACAACCCTTGCACTGTCTTCAAAACCGACCAGTACTGTTGCAATTCCGGTAGCTGTGGGCCCACTGATTATTCCAGATTCTTCAAGCAAAGGTGCCCCGATGCTTATAGTTACCCCAAGGATGATCCAACTAGCACCTTCAC
Gma.2821.1.S1_at	AI461152	At4g11650	4e-86	Disease & Defense			TGGGTGCGGTCCCACAGATTATTCCAAGTTCTTCAAGGAGAGGTGCCCTGATGCCTACAGTTACCCTATGGACGATGCAACCAGCATGTTCACTTGCATGGGATCCGATTATAGGGTTGTGTTTTGCCCTTAATTAATTCAACATCATCAACTACTTTTTTTTTNATTTTTTATTTTTATTTTCCTTCTCTAATTTCGTGATTCCTATTTGTGTTATTGTTGAATACTTTGATATGTGTATTATTTATCACCAAATAAAGACGTTCTTAATTGGGGGCTTTGGGCGCGGATCTCTGCCTGCTGAGATGTCCCAAAATAAGTNATAAACATTNACATAAATTAATTCACATGTCCCAAAAGAGTTCTTGTTATTAGAGTCCTAGGGAGTTGATTTATGAT
GmaAffx.91091.1.A1_at	CF806816	At4g11650	1e-78	Disease & Defense			GAACCCAATAACCTCTTCTATTACGGACACTGAAATAAAAT
GmaAffx.92699.1.S1_s_at	CF808424	At4g11650	2e-13	Disease & Defense			AATAACTGCACCTACACGGTGTGGGCCGCTGCCGTGCCCGGCGGCGGCGCAAGGCTTAACCCTGGCGAATCGTGGAACATCAGCGT
GmaAffx.36484.1.S1_s_at	BI425441	At2g14580	2e-50	Disease & Defense			GTAAAGGTGATTGTCAACTGATCCACTCTGGTGGTGGTGGCCAATACGGGGAGAATCTTGCTATGAGCACTGGTGACCTAAGTGGCACAGATGCAGTGAAATTGNGGGTTGATGAGAAGTCTAACTATGACTACAATTCTAATTCCTGTGTTGGTGGAGAGTGTCTGCATTACACTCAGGTTGTTTGGAGAGACTCTGTGCGTCTTGGATGTGCCAAAGTAGCATGTGATAATGGAGGCACTTTCATCACTTGCAACTATGCTCCTCCTGGCAACTATGTTGGCCAAAGACCCTACTAGGTTGTTACATTTGTAGCAGCGAGATGGCTACCATTTAAGATGATGAGTTATATACCATACATATTAAGAATAAATAATAGCATCATGAATTTATATAGAT…
GmaAffx.42847.1.S1_s_at	BU578388	At2g14580	3e-49	Disease & Defense			GATTTCATTATGTCTATTGTGTGTGTTGGGGTTAGTCATTGTGGGTGATCATGTTGCGTATGCTCAAGACTCACCAACAGACTATGTTAATGCACACAACGCTGCAAGATCACAGGTTGGTGTTCCAAATATAGTTTGGGATAACGCAGTCGCTGCTTTTGCACAGAACTATGCTAACCAACGCAAAGGTGACTGCAAACTCGTCCACTCTGGTGGTGATGGAAAATACGGGGAGAATCTTGCAGGAAGCACCGGTAACCTAAGTGGGAAAGATGCAGTGCAATTGTGGGTGAATGAGAAATCCAAGTATAACTACAACTCCAACTCGTGTGTTGGTGGGGAGTGCCTGCACTACACTCAGGTCGTTTGGAGAAACTCTTTGCGCCTTGGATGTGCCAA…
GmaAffx.88845.1.S1_at	CK605838	At2g14580	3e-48	Disease & Defense			TAACATGCAAGCATAGCATCATGAATTTAGCCAACGACTTTAAATTCGTGTTGTAATACTTTTCAATGTAT
Gma.15877.1.S1_at	BU760936	At5g55850	2e-27	Disease & Defense			GTTCACAGTGATTTTTAATAAGGCCAGGGATGAGAAAAAGACAGGTGGNAACCCAGANTCACCAGGAAAGACTGCNACTGATCCTCATAGCAAACCTGCNGTAGAGCCTGGCAAAACTCANACTAAAAAATGGTTTTGCTGCATGCAAAACCCTTCTGCCGAATCATAGCATAGCAATGGTTGCTCCTGTGAAAAGCCTGAACAGAAGAACAATGTTTNNGTGTAACTAGNGTCACAGTATTTTCTCNAAGATAAGAGCTGTAGAGNCATAAGCGAATTCTACGGAATTTNTATTNTGTGNTGTAAAAGTGAGCTGCAATGGGGGAAAGAAAAGAAGACAGACTATTATTTATGTGTGTGTATCAATGTTGTGGTTTATTATTAGGAGCCAGGGTTGCT…
Gma.18084.1.S1_at	BI317557	At1g09090	2e-64	Disease & Defense			GGAGATGCTAGGTCAGCTTTGATCACAATGCTTCAGTCTCTTCACCATGCCAAAAATGGTGTGGATATAGTTTCAGGGACAAGGGTGAAGACTCATTTTGCAAGACCCAACTGGCGCAATGTCTTTAAACATGCAGCCATCAAACACCCTGACCAAAGAGTTGGTGTTTTCTACTGTGGGGCGCATGGATTGGTTGGGGAACTGAAAAAGCTTTCTTTAGACTTTTCCAGGAAAACCAGCACCAAGTTTGATTTTCACAAAGAAAATTTTTAGATTCTTTTCTCAGTTTATTTATTATTATTTTTGGCAACTGTAGTTATATATAGTTGGATCATTTTTTGTTGTAGTGGGTGGTATATAGCTAGCTGCATTTGATACATGGAACTTACATGTATCNAA…
Gma.8512.1.S1_at	AF236108.1	At1g14700	1e-128	Disease & Defense			ACCTTCTCAAGGACGTGGATTTGGCACTAAGACAATCAACAGCAACCTGGAAGGTAGTGATTGGCCATCATACAATCAAAAGCATTGGGCATCATGGAGACACCCAAGAACTTTTAATACATTTTCTCCCACTTCTTAAGGCAAATAATGTTGATTTGTACATAAACGGACACGATCACTGCTTGGAACATATAAGTAGCCTTGACAGTTCAGTTCAATTTTTGACAAGTGGTGGTGGATCGAAGGCATGGAGAGGTGACACGAAACAGAGCGAAGGAGATGAGATGAAGTTTTACTACGACGGCCAAGGCTTCATGTCTGTGCATATTTCTCAAACTCAGCTTCGAATTTCTTTCTTTGATGTCTTCGGCAATGCCATCCACAAATGGAACACCTGCA…
Gma.3810.1.S1_s_at	BI972063		0.009	Disease & Defense			GGCACAATTAGAATGTTTGCAATGTATTGAACTCCTTAATATGTCCTTACCCTTCAAGGGCTGCTTTGTGGTTTGGCAAAGTATTTGTACTTTTGTAGTAACAAAGAGTACTCTGATGGTAATAATTCCTCCTAAT
Gma.8498.1.S1_at	AF329816.1	At1g12520	1e-107	Disease & Defense			ACAGTAAAGAGCCACTGGGCGACCTGGGAACACTAGAAGCTAACGAAAAGGGTGAGGCCTTCTATAGTGGGGTCAAAGAAAAGCTGAGGGTGGCTGATCTTATTGGACGATCTGTGGTGGTATATGCAACTGAAGATAAATCAGAACATGGTATAACTGCTGCAGTAATTGCCAGAAGTGCTGGGGTGGGTGAGAACTATAAGAAACTCTGTACGTGTGATGGCACCACCATATGGGAGGCCACGGATACAGATTTTGTTACTAGCAAGGTCTGATAGATAAAGTAATTCACTGAAAACAAAGCATTGCAATTTAGTTGTCTTGTCGCCCATCAGCTCTACCATATTTTGAGGATTGTATCCGCCTTTCAGGA
GmaAffx.78614.1.S1_at	BQ611991	At3g52120	9e-07	Disease & Defense			TTACTGAACTTGACATTGGGTGCTTTGTGCAACTCTTCAGGAAAAGTTAACTTTTACAAAGTGGGATGAACTGGTGTGTTGATAGTAGGGTTTTTATTGTGTGCTGCAGTGCTTGTAGTCTTTTGAAACTAATATTTGGGGGAGAAAAGAGGGGGAAGGGGTAATGTTCACTTCAATCGCATTTTTATCCGCCAAAGAATAATGGGTTTTTGGTTATTTTTACTTGTCAGAGCTTTTGGAACATGTTTTTTGTATCGCAAGCATATTATGAAG
Gma.18032.1.S1_at	BG650211	At4g24190	0	Disease & Defense			TGTACCAGACTGCACTCTTTGAAAGCGGCTTCCTGCTTGATGATCCCAAGGATTTTGCTTCCCGGATTTATGATTCAGTGAAGACTAGCCTGGACATCAGTCCTGAAGCAACAGTTGAGGAGGAAGATGACACTGAAGTAGAGGCTGAAAGTGACGCGAAAGAAGATTCAAAGCCTGAAACTGATGCTGTTAACGATGATAATGATGTCAAGGACGAGTTGTAGATTTTGCATGACATCCACTATTTAATGACGGTGCTGCCGATTCCCCTTTGTTTGTTTTAGCTTTAAGATAGACCGTAAAAGACTTCTTTAGCATGAGTTTTGATTTCATAAGTAGTTAAAGGAGAACATTAGTCTTACTGTAATCATACTATCCCCTTGGAATTTTGCCTNACCA…
GmaAffx.83232.1.S1_at	BE023128	At5g65970	2e-61	Disease & Defense			AGTTCTTCATCTTATCCATTTTGCTTTGTTCCAGAATGCGTTCCAAATAACATATTTCTTGTGGATATGGTATTCTTTTGGGCTGAGAAATTGTTTCCATGCTGACTACAAGCTTGCAGTAGTGAAAGTAGCTTTAGGGCTTGGGGTGCTATGTCTCTGCAGCTACATCACCCTTCCATTATATGCTCTTGTTACTCAGATGGTCTCAAGAANGANAAAATCAATATTTGACGAACAAACATCGAAGGCGTTGAAGAAATGGCACATGGCTGTGAAAAAGAAGCAAGGAGTGAAACTTGGAAATTCCAAGGTGCGAGCCATGGATGGAAGCAGCACTGATTCAACAATACACTCTTCTGGCCCCACACTACACCGTTACAAAACTACCGGTCACTCAAC…
Gma.726.1.S1_s_at	BG839313	At3g05500	4e-59	Disease & Defense			AAATACGCCGATCGCAAGGTCGCCGAATTGGACCGCCACGTTCCCTCCAACGTGAAGAAGGTCTCCTCCCAGGCCCGCTCCGTCGTCTCCGAAGTCCGCCGTGATGGTGTCTCCGCCTACGCCAAAATCGTTTACTCGAAGTATGAGCCCACGGCGGAGCAGTGTGCCGTCTCCGCATGGAGGAAGCTCAACCAGCTTCCGCTCTTCCCTCAGGTTGCCAATGTCGTGTTGCCCAAGGCTGCCTACTGCACTGAGAAGTACAATGAGGCGGTTGTTTCCTCTGCTGAGAAAGGTTATAGGGTTTCTGCTTATCTTCCTTTGGTGCCTACTGAGAAGATCGCCAAAGTCTTCGGTGGAAACTGATCTCGTTCTATTGCGTTTTTTAATTTCTATTTTTCT…
Gma.2523.1.S1_s_at	CA852440	At2g15220	1e-74	Disease & Defense			AAATCCATCTCAGTGCAAGATACGTTGGAAACAATAAAGGGGACGTGAAAACAGAGATAACAGGTGTGCTGTACCATGAAATGGTGCACGTTTGGCAGNNNNNNGGGAATGGTCGTGCTCCTGGTGGATTAATTGAAGGTATTGCGGACTATGTTAGGCTGAAGGCAAACTATGCACCTAGTCACTGGGTGAAAGCAGGGCAAGGACAGAAATGGGACCAGGGTTATGATGTTACTGCACGCTTTTTGGACTATTGTGATAGTCTCAAAAGTGGGTTTGTGGCACAACTTAACAAGTTGATGAGAACTGGTTATAGTGATCAATACTTCGTTCAGTTACTGGGAAAACCGGTTGATCAGCTCTGGCGAGACTACAAGGCCAAGTATGGCAATATTGCCT…
GmaAffx.91396.1.S1_at	CF807731	At2g15220	4e-54	Disease & Defense			GTGCACGTTTGGCAGTGGAGTGGGAATGGTCGTGCT
GmaAffx.93642.1.S1_s_at	CF809367	At2g15220	1e-12	Disease & Defense			GTATGGCACTAGTTAAGAGGCTATGAGAGCTTTGTACGATATTTTTAAAAATAAGCGAGAATGTCGCAATCTATTTGTAGATTAATTTGTATTAAGTCTATGTGTATTCAGCAGAATGGATGTTGTACCTAACTCTGATCTGTAAGCCGTGTGTGTGTGCCAATAATTGAA
GmaAffx.91273.1.S1_s_at	CF805964	At4g10270	3e-24	Disease & Defense			AAGATCATCATCACAATAACAAGATGAGTTCAGGAATTAGAGCATGGAGTGTGGCAGCAAGTGTTGGAATTGTGGAGGCCTTGAAAGACCAAGGCATATGCAGGTGGAATCATGCCTTAAGATCAGCTCAACACCATCTCAAAAACCATGTTGGCTCATTCTCTCAGGCTAACAAGCTTTCTTCTTCTGCTATGATATCCACAACACTAAAACATGAGAAGGCAAATCAATCAGAAGAGTCTTTGAGAACTGTCATGTACTTAAGCTGCTGGGGTCCCAACTAGATATCATAAGCCCAACAACAAAATATTCTTTTCTCTTTTCAATTCTAGGAATCAGGAATCAAGCAAGCTTAATTAGTCTCAAATGATGATGAGTATTGAAAGAATATTGCTTGTC…
Gma.4319.1.S1_s_at	CD393260	At3g07230	7e-15	Disease & Defense			ACCTATAATGACAGAGTGACAACAAATTTGCTGCATTCAGTTGTAGAATGATAATAGGTGGTAGNTATTGCATTTGGTTCTACAAAATTAAGATCATTTTGGCTGTGTTCTGAGGTATATGTGGTGTTTTAGACTTTGTTATTGTAATGGTTTGATTTTGGATATGGTTATAATGGACTCAAGTTGA
Gma.17869.1.S1_at	AW156331	At1g12840	6e-14	Energy			TAATAGTACATTCTATCCTTGAAGGGTTGACTGATAGCACAAACAGTGCATACTGGAAGACCGAGGATGAAGTAGGTGCCGGGATGGCTGGCCTAGCAGGTGATGCCGATGCTCACCCCTATGTGTCTTTCACCATCAATGTTGCTTGAGGGCTCTCAGAAACCAGCCCGATACTTAATTTACAATCCATTATGGGCTCCTTTGGACAGCAATAATGCCAATGCAAACAGGATTTGAAGAAGATATTGNTNCATNACGATCATATTTCATTCTTTGTTATTTATCTATATAATTGAAGCGATCAAAGTTTCAAAAGGGTTTAATGAATTTCAAGGGTAGCGTCTGGTGCCAGGATTGACCATTAGCAACTTGTATTGTTTCGTGTAAGTTTTCTTGTCG…
GmaAffx.70836.2.S1_s_at	AI988244	AtCg00180	3e-28	Energy			CGTCTTCCTAGTTATATCGCAAATCTTTTAGATAAATCTCTAAAGGAATTAGAAAGTCTAGTATACTGCGATGTGTGATTTGATAAAAATTTTTTATTGTACAGATTCCGAATGAGAAACTGTCATTCCATTTAATTTAATTGGGATGCCCTGAATCTGACATGTCTCTTGGAATGAGTAACATGAAACTCAGAATTATGGATGTATTGAATACTCCCTAATAAA
GmaAffx.44451.1.A1_at	BI970350	AtCg00170	3e-32	Energy			GAGGATTTTTTAATTGAGTATCAAGGAGTTAAAGAATTTAAGACAAAATACCAAATTAAAGTAGATCAATTTTTTTTCATTCCCGAGGAAGTGCATATTTTACCAGAATCTTCTTCCATAATGGTACGGAACAATAGTATCGTTGAAGTAGATACACTAATCACTTTAAATATAAGAAGTCGAGTAAGGGGATTGGTCCGATTGGAGAAGAAAAAAAAAAAGATTGAATTAAAAATATTTTCCGGGGATATCTATTTTCCCGGAGAAATGGATAA
Gma.584.3.S1_at	BE610674	At5g09600	7e-23	Energy			CTTCGACCCTCTCAATTTTCAATAGAATTGCTGGAGCTTTCCTAGCCGGTGTCATTTTGCTTTTTTATATGATCTATATGAAATTGGGTTTGGTTAGCCTCACCTATGACTCTTTCTACCAGTTCATATTTTATTCATCAAAACTCAACCTGCTTGTCATGGAGATTTCTGCCTTAGCCGTGTCCTATCATCTGTATAGTGCAATTCGTCATTTATTCTTATGATTAGAATCAACAATTGACACCTGAACTGTACGTTTGAACCTGAGGTGGAACTTTGCATAATTCGACCTTGGAGGCATGCATCCATATGTCTGTCAGTCATAAGGAACTTCATTAAGAAATGTGAATTTGCTTTATTGTAGTTATGTATTATTGACTTAATAATTACAATTCTGGC…
GmaAffx.41477.1.A1_s_at	BM270428	At1g12230	6e-16	Energy			GGCCTGCAGCTGTGCAGCTTCTGGCTGCTGGACTGGATGGCCATGCTGATCAAGCAAAGCGGGTGGAAGAGTTATTTGAGAAAATTTGGCCACCACCTAATGTATGATTCGACTTCTTTATGTCGCACGAGAGTCTTTTGCCTGATGGATCAATAAACATAACACACAACAGATGAAGGGAATATTCCATTGTTTTTCTTTCCCTCTTAACCTTGAATTCTTGAACAATTTAGCACGCGGTTCCTAAATGCACATTTTG
Gma.1016.1.S1_at	BE822938	At4g04950	5e-41	Energy			TTCCTGCAGAGACCATTCAAGATCGACTGAAGAATTTGATTGCCTCGTCCCCTGTGATGCTGTTCATGAAGGGTACCCCAGATGCACCAAGATGTGGTTTTAGTTCCAGAGTTGCTGATGCCCTTCGACAAGAGGGCTTGAATTTTGGGTCCTTTGATATATTGACTGATGAGGAAGTGAGACAGGGATTGAAGGTATACTCAAATTGGCCAACCTATCCTCAACTCTACTACAAAAGTGAGCTGATTGGTGGTCATGATATTGTGATGGAGCTGCGAAATAATGGGGAGCTGAAGTCGACTTTATCTGAGTAGGATTATTATTATTCCTTCAAATAACATGTGTTATGTCCTAGAAGCCAT
GmaAffx.93066.1.S1_s_at	CF808791	At4g29670	3e-59	Energy			GGAAAAGAATGCACCAAATATGATTGACATTCACTCCACGCAAGAATTTCTGAGTGCTTTGAGTCAAGCTGGAGATAGACTAGTTATTGTTGAATTTTATGGAACTTGGTGTGCTTCTTGCCGAGCATTATTCCCCAAGCTATGCAGAACAGCTGAAGAACACCCTGAAATTCTTTTCCTCAAAGTAAATTTTGATGAGAATAAGCCAATGTGTAAAAGGTTGAATGTTAAAGTACTTCCTTACTTCCACTTTTATCGTGGGGCTGAGGGGCAGCTTGAATCATTTTCATGTTCACTTGCCAAGTTTCAAAAAAATAAAAGATGCCATGGAGATACATAACACAGCTCGATGCAGC
Gma.4509.1.S1_at	AW433213	At3g51030	5e-21	Energy			GTAGCATGATTTGTGATTCCTCTAAATATTTTCTTCCACCGATTTTAANNANNNNNTNAANANNGNANNANANTNNNAGAAATTGATTGTGGTGGATTTTACTGCTTCTTGGTGCGGCCCATGCCGTTTCATTGCCCCAATTCTTGCGGATATGGCTAAAAAGTTGCCGAATGTCACCTTCCTCAAGGTGGATGTGGATGAATTGGCGACTGTTTCCNNNNNNNGGGAAGTTGAGGCTATGCCAACCTTCCTATTCTTGAAAGAAGGCAAGCTGGTGAAGAAGCTTGTGGGTGCCAGGAAAGAGGAGCTGCAAGACATAATAGTCAAACTTGCTGCAATTGATGCTGCCTGAAGTGCCATATGAATATGTTGAGAATAATTGACTATTGTCTTCGAGTC…
Gma.8119.2.S1_at	CD410224	At3g51030	3e-41	Energy			AAACATGGCTGAAGAGGGTCAGGTTGTCGGCGTCCACACCGTTGATGCGTGGAACCAGCAACTGCAGAATGGAAAAGACTCCCAAAAATTGATTGTGGTGGATTTTACTGCTTCCTGGTGTGGTCCATGCCGTTTTATTGCCCCAGTTCTGGCAGAGATTGCTAGGCATACTCCTCAAGTGATCTTCCTCAAGGTGGATGTGGATGAAGTGAGGCCTGTTGCTGAGGAATATTCCATTGAGGCCATGCCAACCTTCCTCTTCTTGAAAGATGGCAAGATCGTGGATAAGGTTGTTGGTGCTAAGAAGGA
Gma.1305.1.S1_s_at	CD411822	At5g39950	4e-43	Energy			GCTCTACTTCAACGAGATCAAAGATACCGATAAGCTCGTTGTGATAGATTTCTCGGCGTCGTGGTGCGGTCCTTGCAAATTCATAGAGCCAGCGATTCACGCCATGGCCGACAAGTTCAACGACGTTGACTTCGTCAAGATCGACGTCGACGAATTACCTGATGTGGCGCAGGAGTTTCAGGTGCAGGCGATGCCGACTTTCGTGTTGTGGAAGAAAGGGAAGGAAGTCGACAAGGTTGTGGGCGCAAAGAAGGACGAGCTCGAGAAGAAGATTGAGAAACATCGATCGTGATCTTAGCTCTGTAATCCTATTCATTCAGCTATTTATCTTTCTTTCCAAGGTGAAAAG
Gma.15493.1.S1_at	BE474397	At2g17420	5e-72	Energy			GTTTTTCGCAATTGGGCACGAGCCCGCNACCAAGTTCTTGGACGGGCAGCTTGAATTGGATTCTGATGGATATATTGTGACGAAGCCGGGGACGACGAAGACCAGTGTNGAGGGAGTGTTTGCTGCTGGGGATGTTCAGGACAAGAAGTATAGGCAAGCTATTACTGCTGCTGGCACTGGATGCATGGCTGCTTTGGATGCAGAACATTACCTGCAAAATGTTGGTTTACAACAAGATAAGAGTGATTGACTAGCTTGGGTGTGTCCGGAGATCAGAAAATGCTTAATCAGAAGCAATGTTTAATTCCTATAGAAGAATNGNGANNNNNNNNTGCATCCTACNAGAATCTNCATTTGTGGGTTGCNACATTCATATTTTTATTGCAGANNNAGANTTGC…
Gma.5427.1.S1_at	BM091753	At1g15690	0	Energy			TTGGGCCCGAAAGGATCTGAACCGCACAAGGCAGCTGTTATTGGGGATACCATTGGAGACCCTCTTAAAGATACTTCAGGCCCTTCACTCAACATCCTCATCAAGCTCATGGCAGTTGAGTCGCTTGTCTTCGCACCATTTTTTGCCACTCATGGTGGTCTGCTTTTCAAGATCTTTTGATTTGAGGGAATGCAACCGTACTTAGGGTAGAGTTTTCTATCAATTTATCCTATTTTTGTCGGAGCCTGCAGGCATTTTTCTTTTGTATCAATACCCTCTCCACCTTTAGGGGTAGCTCTTCAAATTATCAGGACTTGAAATTTGTTACCAAATGTAGTAGTAGTTTTTGCCAAAGTGAATTTTCAATTAACCAGCTTTTGGACTTTTCATCGAGTTTTT…
GmaAffx.77900.1.S1_s_at	BM139626	At5g50850	1e-53	Energy			TCAGGGTGCATACAAGATATCCAAGGGGCTGCTCGACAAGTATGGCCCCGAGAGGGTTCTCGATACTCCAATCACTGAGGCTGGGTTTNCTGGGATTGGAGTTGGCGCTGCTTACTATGGTCTAAGGCCTGTTGTGGAGTTNATGACTTTTAACTTCTCCATGCAGGCAATAGATCATATTA
Gma.4612.1.A1_at	CD404099	At3g22960	4e-54	Energy			TTTCTTTTGAAAGCCAACATTGCTGCTTGTTCAAAACCTGGGATGCTGCTAGAGTGCTAAAATGGGGCAGAGACTACATGAATGAATTTTGTTCGTTCTGTCATTTTAATTTATAGGACACGACAGAAGTTTGGGAGAGTTAATATTATGGCCTTGAAGTTCTTAGTTTTAATGCATACACCTTCAAGCTCTAGATATCTTTTTTAGTCGAGTGAGGCAATAGTGTAATAGCTACCCTTTTAAGTTGTAAGGCACACATTTGCATTTTCCATGTTTTATATCATTGCATTAGCTTTCCACTTCAATGTTG
GmaAffx.77768.1.S1_at	BI674549	AtCg00340	8e-59	Energy			CAGTCTGGGCATGGATGTTCTTGTTTGGACATCTTGTTTGGGCTACTGGATTTATGTTCTTAATTTCCTGGCGCGGATATTGGCAGGAATTGATTGAAACTTTAGCATGGGCTCATGAACGCACACCTTTGGCTAATTTGATTCGATGGAGAGATAAACCAGTGGCTCTTTCCATTGTGCAAGCAAGATTGGTTGGACTAGCCCACTTTTCCGTAGGTTATATATTTACTTATGCAGCCTTCTTAATTGCCTCGACTTCGGGCAAATTTGGTTAATTTCATTAATTCTTTATTATTATATCTGGCATATCATTTCCTTCTATGGGGAAGGAAGGCCATTTATACATCTAGGATCCGACTTCTATCATTGAT
Gma.8709.1.S1_at	BU765404	At4g36750	3e-60	Energy			ATGGCTTGCTGTTTGGTTTTCCAACAAGGTATGGCAGCATGGCGGCGCAGATGAAGGTGTTTTTCGATTCGACCGGTCAGTTGTGGAGAGAGCAGAAGCTGGCAGGGGTGCCTGCTGGCTTCTTTGTCAGCACTGGCACTCAGGGTGGAGGCCAAGAAACCACAGCTTGGACAGCAATCACACAGTTAGTCCACCATGGTATGCTCTATGTTCCTATTGGTTATACCTTCGGTGCTGGAATGTTCGAAATGGACTCGGTCAGAGGTGGATCTCCATATGGTGCTGGAGTTTTTGCTGGCGATGGATCAAGGCAGGCTAGTGAAACAGAACTGGCCCTTGCTGAGTATCAAGGAAAGTACATGGCCACAATAGTCAAGAAGTTAGGCCAGAAAAGCTAGT…
Gma.8941.1.S1_at	BU764086	At4g36750	8e-05	Energy			GCAAGTATATGGCTGTTGTAGTCAAGAAACTCGCCCAGTCATGAATGGTGTTTTCTTCATTTCATTCTATTCTTGTTTGATTATCTCTGTATTTTTTGACCGTTCTTTTTGTCAAATTGGTTCTAGCATTTTACCATTGCATTGTGATGACTGGTGAGGAACGGCAGTTCTGTTACACTATCGATTCTGTTGGGTTGGGGATTCCCATGTTGGGTTCTGCTTTGTTTCTGGAAGGTGTAGATGTTCGTAAATTTTCGTCAT
Gma.18000.1.S1_at	BG406413	At1g64060	9e-44	Energy			GGTTTTCTATTGTGGCGCACCGGTTTTGGCCAAAGAATTAAGCAAGCTCTGCTTCGAGTTCAACGAAAAAGGTCAAACAAAATTTGAGTTCCACAAGGAGCATTTCTAAGGGAATTTGGAGGGAGCTTCATATCTGTATCTAGAATCAACACAATTAATTTTAGCAACTAGTCGNAGTCAATTATAAGATATGGTTCAATAAGCTAAAACCTTAAGTATAGAATATGAGGCATTGTACATCCCGGCCGGCCGGCAAGATGGCTGGGCATTGATCATACATGTGGCTGCAGCTCAAAGGAGATATTGCCCTTACAAGGCTCCAGCAACTTCAGATACATTCTGCCGAACCGCATAGATTATTGGCCGATACATCCCATAGAAAATATACAACAGTTTTGA…
GmaAffx.14048.1.S1_at	BI942896	AtCg00730	3e-71	Energy			ATTATTATGGAGAACCTGCATGGCCNANNNNTCTTTTATATATTTTTCCAGTAGTAATTCTAGGTACTATTGCCTGTAACGTAGGCTTAGCGGTTCTAGAACCATCCATGATTGGGGNAACCCGCGGATCCATTTGCAACTCCTTTGGAAATATTACCCGAATGGTATTTCTTTCCCGTATTTCAAATACTTCGTACAGTGCCCAATAAGTTATTGGGCGTTCTTTTAATGGTTTCGGTACCTACAGGATTATTAACAGTACCCTTTTTGGAGAATGTTAATAAATTCCAAAACCCATTTCGCCGTCCAGTAGCAACCACCATCTTTTTGATTGGTACTGTAGTTGCCCTTTGGTTAGGTATTGGAGCAACATTACCTATTGA
Gma.62.3.S1_at	BE658575	At3g14940	4e-15	Energy			TTGTTCTCAGATACACTTTTTTTGTTTTGTTATTATGTTGCCCCACCTTTCTGTACAATTTGGTATGCTGCTCTAGAATTCCAGAAGAGCTAGCTACCACACAAATGAATCAATGACATTGATCTGTTATGTTTCTTATGCTTAGTACCGTTACTACACCCTTCTATACTTCTTTGTATC
Gma.10852.1.S1_a_at	CD414600	At1g03130	3e-77	Energy			AGTGCTTGGCTCTTGGGACTAGGCTCAGGTCCAAGTACAAGATCAAGTACCAGTTCTACAGGGTCTTCCCTAATGGGGAGGTTCAGTATTTGCACCCTAAGGATGGTGTTTACCCTGAGAAGGTCAACGCCGGACGCCAAGGGGTGGGTCAAAACTTCAGGTCTATTGGTAAGAATGTTAGTCCTATTGAGGTCAAGTTCACTGGCAAGCA
Gma.7436.1.S1_at	BU547698	At2g02850	2e-36	Energy			TTTGCTTCTTGGTGCTTCAGTCTGAGATGGCTCGTGCTGCCACTTATAGAGTTGGAGATTCTAGGGGTTGGACCTTTAACACCGTTACCTGGCCCCAAGGAAAACGCTTTANGGCAGGTGACACACTTGCGTTCAATTATAGTCCTGGGGCTCACAATGTGGTGGCGGTGAGCAAGGCTGGGTATGATAGCTGCAAGACACCAAGAGGAGCCAAAGTGTATCGGTCAGGGAAGGATCAGATCAGACTTGCTAGGGGACAAAACTACTTCATCTGCAATTACGTTGGTCACTGCGAGTCTGGGATGAAAATTGCCATCAACGCTGCATGACTTTCTTCTCTACTCATACGCATCTATTCTAACGCAAACTGCACCCCTTTAGTGGGAATCAACTTGTCTC…
GmaAffx.30142.1.S1_at	AW311191	AtCg01100	4e-30	Energy			TATCTCTATTCCATACATATTCGTTTCTGACTTTTTTGAAATAAATCAAACATATGGAGTTTTTGTAACGATAATTGGTATCTTTATTACACTAGCTAAAACTTATTTATTCTTATTCCTTTCTATCGCAACAAGATGGACTTTGCCTAGGCTAAGAATAGATCAATTATTAAATCTTGGGTGGAAATTTCTTTTACCCATTTCTCTCGGCAATCTATTATTAACAACTTCGTTTCAACTGTTTTCACTG
Gma.11058.1.A1_at	CD393957	At5g47890	3e-35	Energy			CTGCTCTTGTTATTGCAAATTGCCTTTTGGTTTAAAATAAGCCAGGTCTTTTTCTATGTCCCATGGCCTCTGGTTTCAGCCTGTCTCTGGATCTTACATCGTTTCAAGTATGACACTGTTGAGTTTAAGTTCAAAATCCTGGTTTTGCATGTTGAACACATCGAGGGAGATTTAT
Gma.745.1.S1_a_at	BE821420	At5g67590	6e-48	Energy			AAATCCACTGATGGGCTGGACATCCACTGGGGACCCCTACTCTCATGTTGGTGATTCTGCCTTGACTTTTGATAGNGAANAAGCAGCAAAAGCATTTGCAGAGAAACATGGTTGGGAGTATTCGGTNAAGAAGCCCCACACACCATTGCTGAAGGTTAAATCATANGCGGACAANTTCAAATGGAAGGGACCACCCAAATCTGGTGAAGAGTGATTTGTTGGTTTGTATTCATGTTAATG
Gma.1268.1.S1_at	BU578999	At1g53240	1e-143	Energy			TAAGCAATCCTGTGAACTCCACTGTTCCTATTGCTGCTGAAGTTTTCAAGAAGGCAGGAACNTATGATGAGAAGAGATTGTTTGGTGTTACCACCCTTGATGTTGTTAGGGCAAAAACTTTCTATGCTGGGAAAGCCAATGTTCCAGTTGCTGGTGTTAATGTACCTGTTGTGGGNGGCCATGCAGGCATTACTATTCTGCCANTATTTTCTCAAGCCACACCAAAAGCCAATCTTGATGATGATGTC
Gma.3253.1.S1_at	AW348452	At4g17260	1e-145	Energy	Glycolysis		TACTGTTAGTGTTAGTTCCTGCCCTCTTCTTGCAGTGCAAGTGTTTTTGTTGCGTCAAGTGCTGGCTGGATCTCGTGAGATGTGTTTTGTTTCCTGTATGGTTTTAATTAGCCAAGTAAAATTTCATATTTCTGTANNNNNNNNNNNNTGTGCCTCTATTCAGTCAATTACGGAAAAAGATCTTCATTTCTTTTTCTTTCCATTTCTATGATTTTAGAAAAAATAATGATACTCTCCTATTAATGTGTATCATGCCAGTTTCATTTATTTGTCCAAAATTTGAGTAATGGAAGAAACAGAGAGGATCTTAACCCGTGAATAACTCAATGGTAATGCGGCACATCGAATAGGTGCACA
Gma.2650.1.S1_at	AW349689	At5g20080	1e-122	Energy			CTCCCCGGATGACATACTGCTTAAACAAAAGCTTGACATTCTNGCAACAAGCCACCCAAACTTAAAGATATTCTACACTGTAGATAATCCAACNAAAAATTGGAGAGGAGGTGCNGGNTACATATCAAAGGATNTNGTTGTGAAAGGCTTACCCNGNCCTAGTGATGATACTCTNATACTTGTGTGTGGACCCCCNNGTATGATGAAAGCAATATCTGGAGAAAAGGCCAAGGACTGGACACANGGAGAGGTTTCTGGCNTCCTAAAAGAGGCTGGATACACTGAACAAATGGTATACAAATTCTGAGAAGTTTAGTTTTCTTGCATCTGAAGATAGTATTCGAAGCNCTTGTCCGCTGCAGAATTCGTGTACTGAAATGGTTTTCTGAAGAATAACAG…
Gma.9708.1.S1_at	BE658477		0.002	Energy			ATTCCTTGATGGCATTTGTAAATGCCTTAAGATGNGGATATCAGGNAAATTTTNTTCGNTTTTGGGTTGCAATTCCACTGTGACTATACGTACAGCGGGTTCCTTCTTTATGCTATTACGTGTATATACCATTCGTTTACAGATTCTTCTGTGAACTCGTTGGAAGTGGGAATGGAGGTTTATACAAATAAGATACTCAGTTTTGAATGGTTTTATACTACCATCTTGCGTGGTTGTATTGTAGTAGTCATTCTGTAGGG
GmaAffx.90759.1.S1_at	CF806484	At2g27510	2e-45	Energy			TCACTTAACCCAAGTGTAAAAATGGCAGCATTGAATATGTCCACTGTGAGACTTCCAAGAGCTTCCTTGTCTGGAACGACACCAGCTAGGAGATCTTGTGCTCTCATCAAGAATCCATCATCTTTGAG
GmaAffx.91720.1.S1_s_at	CF807445	At2g21870	1e-88	Energy			TTTGCTAAAGAGTCTGCCCCTCCTGCCCTTAAGGGAGACGAGATGCTGAAGAACATTTTTGTGGAGGTGAAGAACAAATTTGAGACCGCCATAGGAATATTAAAGAAGGAGAAAATCACCATTGACCCAGAAGATCCAGCTGCTGTTTCTCATTATGCAAAGGTCATGAAAACAATTAGAGAGAAGGCAAGCTTATTGTCGGAGTCCCAAGACATACTATCCACCATTGAAATTGAGACACAGGATATTCCAGATGCTCGGACCTATCTTCTGACTTTGAAGGAAATAAGAGTCAAGAGAGGTCTTACAGATGATCTTGGTGCGGAGGCTCTGATGATAGATGCATTGGACAAAGTTGAAAAGGATTTAAAAAAACCTTTACTGAGAAATGATAAGAAA…
Gma.4819.2.S1_at	AW597363	At2g36530	1e-175	Energy			TGGTTCTGCTGCTGTGTATGCTGGTGCCAAATTCAGAGCCCCCGTGGAGCCCTACTGATTGTTTAGCCCAAGATTACTAAGCATCATTTAAATAAGATTCTATTGATGACTGCATAGGACATGTATTTTTTGCGAAAAATAAACTTGTCTACTACTTCAGAGAATATAGGTTTTCCGGGCGTGGAATTTTGAAGCGAGAAAATAAGGCAGTAGATGTATGCCTGATGCCTAGTTTATTTGAAATCTAGCTTTAGGGGGTGTTTGGTGCGACAAATTGTTTTCCAGAATCATAA
GmaAffx.80404.1.S1_at	BM085436	AtCg00670	6e-06	Energy			CTTGGGTTGATATATAGTGCGACTTGTCAGATATAGTAGGTCATATGGGATTTCCCCGTTTTCTCCCCCGATCGAGATATCCTCTCTTTCACCCCCAAAAGAAGAATGATTGAATCATAAAAAATTTGGAGCGTGAAGTGTAATGAAATAAANTNNTATCGATTTTTTTATTTTTAGAGGTGGTATCCAGATTATTACTCGAAATTATGAATAATTTATGGTTGGCTTGATTGAACCAATAAAATAAAGTACCCAGGCTCTGTTTAGAAAAAACCAATTGGTAATATATCTACGATCACCACTTCTATCATATCCGTATATTTTACAGAAAATATTAAATAAGAAATTCAGAAAAGGAAGAAGTTTTAACAAAAATACGTAGTATTGTAATATTTGTCC…
Gma.5793.8.S1_s_at	BG508518	At5g53560	1e-31	Energy			AGTGACTGCAACAGAGAAGGATGCCACCACTGATTTTGAAGATATTGGNCACAGTGATTCAGCAACANAGATGATGGAAAAATACTTTNNTNGGTGAGGTTGACACCAACACTCTTCCAGCACAAGTTACCAGCAGCAGCAGTGTACGCCCACCAACACAAGCACCTGTCTATAACAATCAATCTTCTGGATTTGTTGTGAAGATCTTGCAGTACATAGTGCCATTGCTGATATTGGCCTTTGCATTTGGCCTGCAGTACTATGGCAAAAAAANNNNGNNCANNNAGTCAGAAAATTGAACTTGAGTTGTGACCATTGTTTTAGTACTTCTATTATTCATAAGTCTCTAACAACAGTGTCCTAGTGGCAATAGACTGGTGCCATTGTTGTTTCTTTTCT…
Gma.1186.1.S1_s_at	CD411934	At2g32720	3e-59	Energy			GATGCAACCAATGATTTTGAGGATATTGGTCACAGCACCAGTGCCGTAGCCATGATGGATGAGTTCTATGTTGGAGACATTGATACATCAACCATCCCCAGCAAGGTTAAGTACACTCCTCCAAAACAACCTCACTATAACCAGGACAAGACTCCGGAGTTCATCATAAGGATCCTCCAGTTTCTAGTTCCGTTGTTTATCTTGGGTTTGGCAGTTGGCATTCGTTTCTACACCAAATCAACAT
Gma.5797.1.S1_at	BM523730	At1g22450	3e-44	Energy			GAGAAGGTGCACCAGAATGTGACAAGTTTGCCAAATATTATCGTTCTCTTTGCCCTGGTGAATGGNTTGACAGATGGAANGAGCAAAGGGAGAATGGAACATTCCCAGGCCCGCTGTAGGTGGTGNNCATANCTGAAATGGCTGCACAATTCNTTTTNCAGTATTATATTTNAAATTGCTAGAGATAAACTCCCATACATTTGGGGAATGTACGCATTGGCCTAATAANANNTTTTGGATATATGTTTGAACTAAGCTTGAGTTATACAATTTTCAGGAAANCGCNNCTGGTGAAATGTCCAGAGATATATGCT
Gma.10771.2.S1_at	BU762116	At4g10040	8e-58	Energy			TCATACAGTTATGCACTTTGCTTCAAAGTTCTGGAGATTTAGTTTTCAGACATTTAATTCTGTGGTGCAGTAAATACTGTATCAACAAATAAAGTAGACTTGATTGGTTTGCAATGCTATTTTGTTCGTTTTGCATTGCTTCTTAAGAGGCTGCCATATATTGGCTACTGTTCAATTAATTTGGTTGTTGAAAGTTTAAACATTGT
Gma.6660.1.S1_s_at	AW348858	At4g10040	5e-55	Energy			ATATCTGAGAGAATCCACTGCACAGTGATTATACATTTTCATACATTCAATTTTTGCAGTGTGCTTTCAAAGTTCTGGAGATTTAATTTTCGGTCATTTAGTTCTGCCATGCAGGAAGTGCTGTATCTTTGGCAAATAATGTAGGCTACATTGGTCTACAACGCTATTTTGTTCATTTTGCATTGCCTCTAAAAAAAACAGCCGAATATTGGCTGGTGTAACAAATTATCTCTTTA
Gma.17435.1.S1_at	CD412525	At5g40810	1e-129	Energy			TGGTACCCCTGCTACAGAATCTCAGATGGGTAAAGANATTGTATCATTCCTGACTTGGGCTGCGGAACCTGAGATGGAAGAGAGAAAACTGATGGGATTCAAATGGATATTTGTTCTATCACTGGCATTACTTCAAGCTGCCTATTACCGTCGNCTTNGGTGGTCCGTTCTAAAGTCTCGCAAGCTGGTTCTTGATGTTGTCAACTAGCTGCCTTCCNGTTTCATTTCATTTTTNACATCAGGAAANATTATTGTTGNCAATAATTTTGTCAGATGCTAANGTTGTCTCNTCATGTCAANTTNNTTGANGGAGTAACTGAAGCNTGTTCTATTTTTGTTTGAGATAGAAATAAAGCTGCTCCGTNTATGTGAGATATANTTANNNNCACTTTTTCTTCC…
Gma.16706.1.S1_s_at	BU551340	At2g44350	1e-134	Energy			TGTGCCTCCCATTCTTACCAAGTTAGGCAAGGTTAAAAATCCATGGCCNAATGTTGATGCNCACAGTGGAGTGCTACTGAACTANTATGGTCTAACTGAGGAAAACTATTATACTGTTCTCTTTGGTGTATCAAGGAGCTTTGGAGTTGGCCCTCAGTTGATATGGGANAGGGCTCTTGGAATGCCACTNGAAAGGCCNAAAAGTGTNACACTNGAGAAGCTCGAGCAATTGGTNGCCAAATCATCNTGAAATTTNANGCNCCATTTCTNNGTTAATAATTNCTAAAATACACACTGCGGTAGATGTGTGNNGTGGTGTTGAGTTGAAAATNTGGTACCATTGTAATGAGNAATATTNANTACCCTCCCCNATGGTTTCTATTTNAGAAGATTTTGGTA…
Gma.15514.2.S1_at	AI965499	At3g52300	1e-65	Energy			TTTCAATTAGCAAACCATCAGAGGTTGATGTTGTTCTTGCTGGTTTAATAATAACAACTACATTGAATTCTTTGTAACTCGGTTCTCTTTTTCAGTTCAAAGGTTCTTATATTACAGTGTTGAAATTNTGTGGTACTGTAGTTAATCACTTGAGACTTATCCACAAAGTGCGGTTGTGGTCGTCGGCGAAACTGCTGATAAGGTTTCCGTCCGGAGACAATTTGAAGAAAATGTTGTTTTGCGTTAGTCTTAATAAATT
GmaAffx.92392.1.S1_at	CF808114	At5g47030	2e-63	Energy			CCAGAAGGGTCTCCAAGAGTTCACTCAGAAACTGAACTCAGCCACAACTGATTTGGAGAAAGCTGAAGCTCAGATTGGGGNTTGATGTCCATAGNGCTCTNAACTCTGCTCTTNCAGGCTAATAATAAGTACTGTAGTGGTAAGTCTTTCCTTCTGTATTTGGTTATTTCCCCCCACTATGTGGCATTGATTTGTCTCGGTGTAATCAAAGTTGCTAAAAGAACATTTTCACCATGAAATTCTATGTTGAAAGTGACTTGAT
GmaAffx.11243.1.S1_s_at	L17319.1	AtMg01080	1e-12	Energy			GGAAACGTATTCAGTTCATTAATTCATTCCGTGGCAAGAAATCCATCATTGGCAAAACAGTTATTCGGATATGCAATCCTGGGCTTTGCTCTAACCGAGGCTATTGCCTTGTTCGCATTAATGATGGCCTTTTTGATTCTCTTTGTTTTCTAAGTTTCTCCTTTTGAAAGGTGTAGTCTC
Gma.11940.1.S1_at	BI942780	AtCg00480	1e-76	Energy			GGAGCTGCCCTAAGTGTTCCAGTAGGTGGAGCAACTCTAGGACGAATTTTCAACGTGCTTGGAGAGCCCATTGATAATTTAGGTCCTGTAGATACTCGCACAACATCTCCCATTCATAGATCTGCGCCTGCCTTTATACAATTAGATACAAAATTAGCCATTTTTGAAACAGGAATAAAAGTAGTAGATCTTTTAGCTCCTTATCGTCGTGGAGGAAAAATAGGACTTTTCGGTGGAGCTGNANNNGGTAAAACGGTACTGATTATGGAATTGATCAATAACATTGCCAAAGCTCATGGAGGTGTATCTGTATTTGGCGGAGTA
GmaAffx.26088.1.S1_at	BI970414	At5g65750	2e-42	Energy			TCAAGGTTCACCAGAAGGAGCAGACTGAGATTGCTGAAAAAGCCNTTCAACANGAACCNATCGACTTCCCATTTTGAAAANNCNTTTGCACATGCATCCATCTTTTTTGAGAGTGATAATAATGCATTTAGTTTAATTTATCCACCACGTAAGNNGCTATAGTTGGAAGGAAGGNGACNTCATACATTTGCTTTCNAGTTTTGACCTTTTNTNATNTTNTNNNGGTTCCTTNCAAAAAGTNNGNTAAGCTGAATTTCAACATNCNTATGCTGAAANTATTTNTATTTCCTTGNNNCGATANGCAAAGGCGTGGTTGNCTTACTNGNTGAATTGATGCCNNNNNNNNNNNNNNNNNNNNNNNNNNNNNNNNNNNNNNNNNNNNNNNNNNNNNNNNNNNNN…
Gma.13515.1.A1_at	CD400856	At4g04910	2e-28	Intracellular Traffic			GTCCTAGAACAGTTGAATGTGTTTACTGATGAAGATATTGATTCTGCTGCAGAGGCGTTGAATGATATGCCTATCAGGAAACTATACATGTTGATCGAGATGGCAGCGCAAGGGGAGCATGGTGGATCTGCAGAAGCCATCTTTTCTGNNNNAGNGAAGATTAGTATCGCTCANTTCTATGATTGCCTCCAGGATGTTGTTAGGTTATAAGTTGTTGTATTAAGCGCTTTCTAAGTTAGAGTGCATATAATCCTTATTGAGTTGAAATCTTTTTTTAACAGTTCATTACATTGCTTGNTNCGGTTCAGTTACAGAGATTTTTTTGAATCAGTGTTTGTTTGGTTGTGCTGATAGTAATTTTGAGAGGAGGCAGGGGTTTCGTAGTCTCATGTTTTATCT…
GmaAffx.1301.59.S1_at	BI974591	At1g35720	4e-47	Intracellular Traffic			ATGGCGACACTTAAGGTTCCTCAGCCTCTTCCCCCCGTTGCAGATGATTGTGAGCAGCTCCGAAAAGCCTTCTCAGGTTGGGGAACTAACGAGGAGCTGATTGTATCGATCTTGGCTCATAGGAATGCTGCTCAGAGGAAGCTTATCAGAGAAACTTATGCCCAGACCTATGGAGAAGATCTCCTCAAGGCCTTGGACAAAGAACTCACGAGTGATTTTGAGAGGCTGGTTCATCTTTGGACACTTGATTCTGCTGAACGTGATGCATTTTTGGCAAACGAGGCGACTAAAAAATGGACTTCAAGCAATCAGGTTCTGGTGGAAATAGCCTGCACTA
GmaAffx.89049.1.S1_s_at	CK606168	At2g38750	2e-94	Intracellular Traffic			ACATCTCCAGGCAGTTTACAAGCACTATAAAGAGATATCTGGCAAGAACCTTGATGAGGATCTTGATGATTTAAGATTTAAAGAGGCTGTGCAATGCCTTTGTACCCCACAAACATATTTCAGCAAGGTTTTNNATGCAGCATTGCGAATTGATGTGGACAAGAATACTAAGAAATCGCTTACTCGTGTCGTTGTTACTCGAGCTGATATTGATATGAAAGACATAAAGGCAGAGTACCATAATCTATATGGGGTTTCTTTACCCCAGAAAGTTGAAGAGGTTGCTAGAGGGAGCTACAAGGATTTCTTACTAAACTTGATTGTTAGAGGAGGCTAATTGAAGAAATTGAAAAGAGAACAAAAACTTGGAAGATCAAATAAAAAAGGAAAATTTTTTCC…
Gma.385.1.S1_at	BE347563	At1g68090	8e-97	Intracellular Traffic			GGGCCTTTGAACATGCACTTTTGACAATAATCCAATGTGCTGTTAATCCAGGAAAGTATTTTGCAAAGGTGTTGCATAAGGCGATGAAAGGCTTGGGGACTGATGATTCCACACTCATTAGGGTCGTTGTGACAAGGACTGAGGTTGATATGCAGTATATCAAAGCTGCATATTTAAAGAAACACAAGAAGACTCTGAACGATGAAGTACACTCAGAAACATCCAGTCACTACAGGACTTTTCTTCTCTCACTTTTGGGCCCTAATCACTAGCCAAGATGTTCAATGATGTAAGTGGAATAAATTCACCCTTGATGTGTAAATTTGACTGTTTTTAGTGCTTTGTGATCAATGTAGCCGACAACTTGT
Gma.6298.1.S1_x_at	BM309168	At3g62290	1e-100	Intracellular Traffic			CTTCCAAAACACACAGGGTCTCATTTTTGTGGTTGACAGCAACGACAGGGACAGAGTTGTTGAGGCCAGAGATGAGTTGCACAGGATGTTGAATGAGGATGAACTGAGAGATGCAGTATTGCTCGTATTTGCTAACAAACAAGATCTTCCCAATGCAATGAATGCTGCTGAAATTACCGACAAGCTGGGTCTCCACTCTCTCAGACAGCGCCACTGGTACATCCAGAGCACCTGCGCAACCTCTGGGGAGGGTCTTTATGAGGGTTTGGACTGGCTTTCCAACAACATAGCCAACAAGGCTTGATGCTTTTTGGGAGTCTTCTTGTGGATTGGTGATTCTGGATGCAGGGGTGAATATTATCTAGTTTGTTTTTTTGGTTCTCTCATGAGACAAATTGG…
GmaAffx.5931.1.A1_at	BI967201	At3g03120	8e-25	Intracellular Traffic			ATATAGCATACTTTTCCTCTTGAAAAAAATNTTCTCCTCAAACAATGAGTTTTGCATTGTGCTCTAGTGTGGTTATAATTGTTAACATTTTCTTTTTCTTTTGTAGAGAGGGGCAATGACGCCAATGGAAGTGTGTGAAGNACTAGGTCTCTTTGATCTAAAGAATAGAAAATGGCACATACANGGCACTTGTGCACTNAAGGGAGATGGTCTTTATGAGGGCCTGGACTGGTTGGCTTCAACACTGAAGGAAAGAAAAGCTGCTGGATACTCTTCAATAGGAACCTCATCCTTCTAATNTAGGTATNNNNNNNTTTGTCATTGAGGAACGTGCAGGGTTTGGCCAGTTTCANTCAAGGATGTTGTAAAAAAGTAATCAANTTTNNNGAGTTNCATTNN…
Gma.12506.1.S1_x_at	CD404127	At3g49870	1e-93	Intracellular Traffic			ATCATTGGGTGGCATCCCTCTGTTGGTATTGGGGAACAAGATTGACAAAGCGGNGGCTCTGTCTAAACAAGCANTGACNGACCAAATGGATTTGAAGTCAATTACTGACAGGGAAGTTTGCTGCTTCATGATCTCGTGCAAAAACTCGACCAACATCGACTCTGTTATTGACTGGCTTGTAAAGCATTCCAAATCAAAGAGCTGAGAGCCTACTTTCTGTTTTGAACTCTAGTGTAATTTATGGGTGACACATTTTCTGGATTTACTAGAGGCATTTGCATGTCTAACTCGGTTGCTGATTGATTTGTTTTTCCCTTTTGTCAGATGCTTTGTAATATAATATCACATCATTCTTGTCCNATAGGGANTTAAACGGGANNANATACATGTGAAGGGTTA…
Gma.7813.1.S1_at	BU550409	At5g67560	1e-29	Intracellular Traffic			AAAGAAGCTTTGACCGACCAAATGGATCTGAAGTCAATTACTGACAGAGAAGTTTGCTGCTTCATGATCTCGTGCANAAACTCGACTAACATTGACTCTGTTATCGATTGNCTTGTAAAGCACTCCAAATCAAAGAGCTAAGAGGCTCCCTTATGTTTTGTACTCTAATGTAATTTCAGTGACATATATCTGGAAGTTGCTGGAGGCATCTGCATGGCTAACTTGGTTGCAGATTACTTTATTCCTGCCCTTTTCTCATTTGCTTCTTAATGTAATATCATGTCCAATGACGTGTATCAAACAAGATGAAATTCATGTCAAGGGTTGTTTTGTGCGTGAATCATATTGTCATTGTCAGTTTAGTTGCATTTTTAGAATACTTGCAGAACTGCAGTTGTG…
Gma.3836.1.S1_at	BI317703	At4g23460	1e-122	Intracellular Traffic			TTACTTGTATTCTTCACCGAGGATGGTAGAATGGAACGTTCCAGTTTTCTAGAGACATGGAGGTCCCTTCCAGATTCAAACGAGGTTTCCAAGGACTTCCNNNCNANNGTGATTGGCANTGCGGANGCAACANTGGAACGACTGGCTGCGTCAAACATGTTCTTTATTGCAAAGCGCAAGAATGCAAACCAGGACGTGTTTTACTTCTCAGCNAAACTCCCTAGAGGGATACCATTCTTAATTGAACTTACCACNTTGANTGGAAACCCTGGCGTNAAATGTGCAATCAAGACTCCAAGCCCTGAAATGTCAGCACTTTTCTTCNNNGCCNTTNNGACTCTTCTCANGGGTTAATGGGTTNTAAATTTAGTTTTTTCTTNTAANTNTNGTTTATATATN…
Gma.2138.1.S1_at	AB040543.1	At3g09800	7e-65	Intracellular Traffic			ATATGGCATTTCACAATGACGGAGGAAACTTGTCTTTAGGTTTTTCCTATAAACGTTTATAAGAAAGAACCTCATTGCATTCTCGAGAAGTCGAACCTGGATGTTGATGTTACTTGCGTAGTGAAAGTTAATATTGACATGCTAATACAGGCTATTCTAGCAGTACTTTTCTTCTGGCGATTTGTTATTTTAGTTACCTATTAAATTTCAGGATGGTGGCATATTCCGTATGTTCCAAAAATTTCA
GmaAffx.1729.2.S1_at	BG726769	At4g35410	6e-79	Intracellular Traffic			TGTTGGTGAATACACCCACTCACGCGTTCGTGGTTGCAGGCTCTAATCAGATCCCAAATGATCAACTTTGTGCTTCTCATTAGTCGCCAAGGGAAGGTGAGACTGACAAAATGGTACTCACCTTATTCTCAGAAAGAAAGGAGTAAGGTAATCCGTGAGCTCAGTGGAATGATTCTTTCCCGTGCTCCCAAGCAATGTAATTTTGTAGAATGGCGAGGACATAAAGTTGTTTATAAAAGGTATGCTAGTCTCTATTTCTGCATGTGCATTGATCAAGATGACAATGAATTAGAAGTCCTTGAAATAATTCATCATTTTGTGGAGATTCTTGACCGGTATTTTGGCAGTGTCTGTGAACTGGACTTAATATTCAACTTTCACAAGGCCTACTA
Gma.3839.1.S1_a_at	CD391787	At1g60780	1e-156	Intracellular Traffic			TATCAGGCTCTTCCATGGGTGAGATACATAAC
GmaAffx.46098.1.S1_s_at	BM086650	At4g24550	9e-78	Intracellular Traffic			GATTGTAACTTCCATGAGTCTGTACACCTTGATAGTTTTGATGTTGATAGAACTTTGTCATTGGTACCACCAGAAGGTGAATTTCCAGTCATGAATTATCGTATGACTCAACCATTTAAGCCACCCTTTCGTATTAATGCATTAATTGAAGAAACAGGATCCCTAAAGGCTGAAGTGACCATTAAAGTGCGAGCTGNNTTNNNCTCAAGTATCAATGCTAATACTGTTCTTGTGCAGATGCCTCTGCCATCATTTACATCTCGTGTTACTTTTGAGTTAGAACCTGGAGCAGTTGGACACACCACTGATT
GmaAffx.1729.1.A1_at	BI426505	At2g17380	2e-14	Intracellular Traffic			GGAAGAAGTCAGTTCATTAAGTAATATAATTGCACAAGCNNNNNANNNNNNNNAACAAATGNTNCANTTNCCTGCTCCTCATATAGTATGTCGAATTGTCAATGTCCGATTTTACTGTTACTAAGTTGTCTTTCTTGATGTTGTCTTTCTCACATATCATGTTTGTGTATGCCTGAACTGTATTACTTGTTGTGGTGAGATTGAGCCCCCAGGGTTACTTTTACTTTGCATGTTCTGAGATTGAAATTGAATAGATTCCTTGGTAATATCCTTTTTCTTTTTCCCATTTTGTAATATATTGTTTGCTATAAAGAGTTTGTAAGAATGATTAGAAATTATTTTAATAGGTAGAGTATTATTTTCATGGATAANAAANNANNNNAAANAANNNCTNNNNNN…
Gma.2369.1.S1_at	CA802514	At5g61790	1e-88	Intracellular Traffic			ATTCCCTTCCTGAGTGCCTACAAGCTTAAAATATACGATGTCATTGAGAAGGGTCAAGAGCAACCAAATCTCACTGTTGGAATTGTTGTAGCCGTTGTGGTTGTCATCGTGTCAGTTTTCTTGAGGCTCATATTTGGTGGGAAGAAGAAGCCCACAAGGGTGGAGAAGACAAACGTAGAACCAGCAGAAACTGCAACTAGCCAAGGCAGTGGTGAGAATGAGGAAAACAAAGAGAAGGAGGAATCATCTGCCCCTGCACGTCGGAGGCCAACAAGGAGAGATAATTGAAGAAATGATTGAAACTTAACAGACAGGGGCGGCCATTAAAGAACACTACCGCACATAAATTTTGAGCTTAGTTTGGGCATTAGGCCAATTCTGTAGTAGCAGGTTGTTGTA…
Gma.2369.1.S1_s_at	CA802514	At5g61790	1e-88	Intracellular Traffic			TATACGATGTCATTGAGAAGGGTCAAGAGCAACCAAATCTCACTGTTGGAATTGTTGTAGCCGTTGTGGTTGTCATCGTGTCAGTTTTCTTGAGGCTCATATTTGGTGGGAAGAAGAAGCCCACAAGGGTGGAGAAGACAAACGTAGAACCAGCAGAAACTGCAACTAGCCAAGGCAGTGGTGAGAATGAGGAAAACAAAGAGAAGGAGGAATCATCTGCCCCTGCACGTCGGAGGCCAACAAGGAGAGATAATTGAAGAAATGATTGAAACTTAACAGACAGGGGCGGCCATTAAAGAACACTACCGCACATAAATTTTGAGCTTAGTTTGGGCATTAGGCCAATTCTGTAGTAGCAGGTTGTTGTAATTTTTCCCTTCACCTTTTGAAAGATGATAT…
Gma.6427.1.S1_x_at	U20502.1	At5g61790	0	Intracellular Traffic			TTTGACCTCTTGTACAAGATTGCAGATATTCCCTTCTTGAGCGAGCACAAATCTAAGATTTTCGATCTCATTGAGAAAGCTGAGAAACAGCCAAATCTCACAATTGGAATTCTTGTAGCTGTTGTGGTTGTCTTCGTGTCAATTTTCTTCAGACTCATATTTGGTGGCAAGAAACCTGCAAAGGTGGAGAAGAAACCAGAACGCACAGAAGCTTCCAATAACCAAGG
GmaAffx.1112.1.S1_at	CD396251	At5g61790	2e-06	Intracellular Traffic			AGAAGACAAACCCAGAACCCGCAGAAACTGCGAGTAGCCAAGGCAGTGGTGAGAATGAAGAAAACAAAGAGAAGGAGGAATCATCTGCCCCTGCACGTCGGAAGCCAACAAGGAGAGACAATTGAAATGATTGAAACTTGACACAGACAGGGGCGGCCATTAAAGAACACTACCGCACATAAATTTTGAGCTTAGTTTGGGCATTAGGCCAAATACCGTAGTAGGTAGCACGTTCTTGTCATTTGTCTCCTGCACCTTTCGAAAGATGATATTGCATAAGGGAGTGTAGATCAGATATTTTGTGTCGTGCTGATGATCACTTTGGAGACTTGAGCATTTTAAGCTAATTGAGGCTGTACATCAC
Gma.7062.1.S1_at	AW734156	At4g34450	1e-131	Intracellular Traffic			ATGTGAAGGTTCTTGTGCGGTTGTCTTTTGGACTTGATGGTCCAAAGGATGTTGCGATGAAACTTNCTGTCAGATCCGAGGATGAAACTGTNAGCGATACNATCCATGAGATTGTGGCTAGNGGCTAGTGCACTNNNTCAAGAAATGTTGNCTCAACTCGGCCTTTCTTTTTGTTACTGAGATTGGAGTTTAGCAGCCTCATAGATAGCCGTGTGTAAAAAGNATTGCAAAACTGTACACTTNNNANTATATGCAATTTATTGGTCNCCCATTNNGCATGCTTNGTTAGACNNGCAACAATACTTNCCAGTATTACGTTGGGTNTGTTGGAGTAAACTTCAATGGTGATGATTATACTTTTCATTTATTTGTAGCAACTGTAATACGAATTTTGG
Gma.7277.1.S1_at	CD407589	At4g34450	1e-127	Intracellular Traffic			TTGGTCCTAGAGAGAGCTTGGCTGAAGCTGTAAACACTGTTATCAACCTACTTGGCTTGGAGCCTTGTGAGGGCACAGAGGAGGTTCCACCCAATTCAAGATCACACACATGCTTATTGTCAGGTGTATTCATAGGGAATGTGAAGGTGCTTGTACGGNTGTCTTTTGGACTTGATGGTCCAAAGGATGTTGCAATGAAACTGTCTGTCAGATCAGAGGATGAAACAGTCAGCGATGCCATTCATGAGATTGTGGCAAGCGGCTAGTCCATTGAGTCAAGAAATGTTGACTCAAATCAGCCCCTTTTTTGGTTAATGAGATTGGAGTTTAGCAGGCATATAGATATTGACGTTTGTAAAGAATTTCAAAATTGTAATTGTTTGTCCTTCACTCACTGCA…
Gma.16342.1.S1_at	BI968678	At5g14420	1e-55	Intracellular Traffic			CTTTGAGCAGAGTGCCCCTTCTTATTATGACAACANGGACCNNGTTGGCACAGCTCCTCCTGCCCCAAGTTCCNCATATGACAATCAGCTTTGCCCCATATGTCTGACCAATTCAAAAGACATGGCCTTCGGATGTGGACATCAGACATGTTGTGAATGTGGACAAGATCTTCAGTCGTGTCCCATCTGTAGAAGCCCCATTAACACCAGAATTAAGCTTTACTAGGNGGCNTCTTCCGTTGTGAATTAANTATTTTGTNGTGTAAGCTAAAATTCTTTGATTTTTTTAACCTTCTCTGGTTGTATACAAACGTTAGATCAGCTGTGTCTATTGATGAAA
GmaAffx.36631.1.S1_at	BI700021	At3g59290	5e-21	Intracellular Traffic			ATCACAGTTTAACAGCCAGAGCTTTANTGGACAACAAGGGAATGCNNCCCCCNATAGCTCACCAATTACCAATCAATCANNNNCTTNNNNNGCTTCACAATCNAATTCTTTAGTTTCTCAACCATCCAAGGACAAGTTTGAGACNAAATCAACAGTTTGGGCAGATACACTAAGCAGGGGATTGGTNAATTTGAATATATCTGGACCTAAAACAAATCCATTAGCAGATATTGGGGTTGACTTTGAAGCCATTAATAGGANGGAAAAGAGAATGGAGAAGCCCACTACCACNGCTGTAACATCAACTGTAACTATGGGTAAAGCTATGGGATCGGGTTCAGGTATGGGTCGGTCTGGTGCTGGTTCTCTNAGGCCTCCTCNAAACCCAATGATGGGTTC…
Gma.6833.1.S1_at	BU545297	At5g11710	1e-28	Intracellular Traffic			GATTGATCTCAATATAACTGCTCCTAAAAAAGTATCCCTTGNGGANGTTGGAATTGTGGGTGGATTGAGTGATGGATCCGATGAAAGGGAGAAAGGCCCTCCACCTTCATTTTACATGGGGAGAGCTATGGGTTCAGGATCTGGTCTTGGAATGGGTAGGTCTGGATTCACTCCTTCACAGCCANNAGCTGGAGACGACTTTTTCTCAANCCTTNGNAACCAACAANATCAATTTGGTGGGTTCCAAAAGTAAAATTCTCAGATTTTATACTCTTCCCATCACATTTTCACNCATTCTTTNTGTNNCGGCATTACCAAGCTTGNNNAAGCTTTTTGGCATGGCTTTTTGTTCATATATATTTCTCCCAATATTGTGATTATATTATTTTAAATTTTAAG…
Gma.13352.1.S1_at	M64337.1	At5g01600	2e-80	Intracellular Traffic	Ionic Homeostasis		ATCTTGAATAGCCTTATTATTAGTCTTCATTTACATTT
GmaAffx.93603.1.S1_s_at	CF809328	At5g01600	4e-49	Intracellular Traffic	Ionic Homeostasis		CCCATTTGGTTATTTCGCCCTAATGGCTCTTGCTCCATCCAAAGTTTCCACCTTTTCTGGTTTTTCTCCCAAACCCAGTGTTGGGGGTGCTCAGAAAAACCCAACTTGCTCTGTTTCTCTGAGCTTTTTGAATGAGAAACTTGGAAGCAGAAACCTTAGGGTTTGTGCCTCAACGGTGCCTCTCACTGGGGTGATTTTTGAACCGTTTGAGGAGGTTAAGAAGAGCGAGCTTGCTGTTCCAACTGCTCCCCAAGTCTCGTTGGCTCGTCAGAACTACGCTGATGAGTGTGAATCTGCGATTAACGAGCAGATAAATGTGGAATACAATGCTTCCTACGTGTACCACTCCTTGTTTGCATACTTTGACAGGGACAACGTGGCTCTCAAGGGATTTGCCAA…
GmaAffx.37006.1.S1_at	AW351002	At4g20410	6e-44	Intracellular Traffic			AATGCTACCAATAGCCAGTGCAAGGCATATCTTAATGCAATTGTTATCTACCTTTATGCCCATGACTTTAACCAAGCTGAGAAGTGTTATAATGACTGTTCTCAGATTGATGCTTTTCTGAGAAGTGACCAGAATCGTTGTGCTAGCAACCTACTTGCTGCCTACACAGATGGAGATGTTGAAGAAATCAAACGTATTGCTCAGTCAAGTGTTATTTCACATCTTGACCATGTGATCATTAAGCTTGCGAGGAAACTTCCAACAGGCGATGTGAGTTCATTGAAGGCTAACAAGGCTGAAGATGAAGAGGAGCCACTCGATGAAAATGACCTCACTTAACCTGGCTCTTTTTCTATCTGTGTCTAT
GmaAffx.91533.1.S1_s_at	CF807258	At3g54660	2e-92	Intracellular Traffic	Ionic Homeostasis		GAATTCCATACCGAGGAGTCTCCTCAAGCTATCACGAAGTCAGCGGATGGCTCATTCTCTTTAAAGACCAACAAAGGTACAGTGGACGGTTTCTCACATATTATGTTTGCTACAGGACGCANACCTAATACTCAGAACTTAGGCCTGGAGTCTGTTGGTGTGAAACTAGCTAAAGATGGAGCTATAGAGGTTGATGAATACTCTCAAACATCAGTTTCTTCAATTTGGGCAGTTGGAGATGTTACAAACAGGATAAATCTCACCCCAGTTGCTTTGATGGAGGGAGGAGCATTAGTAAAAACGCTGTTTCAGGATAACCCAACAAAACCTGATTATAGAGCTGTTCCTTCTGCTGTATTTTCTCAACCACCAATTGGACAAGTTGGTCTTACTGAGGAA…
Gma.1413.1.S1_a_at	AW734487	At1g15880	2e-97	Intracellular Traffic			ATTCTTCAAGATCTCACCCAGGAGTTTTATCGTCTTCGCTCAAGTCTTAAAGCTAAGCAAGAACATGCTTCACTGCTAGAAGATTTTAAAGAATTTGATCGAACAAGATTAGATTTGGAACAAGTAGACTCTGAACAGCATGCACTCCTAAAAGAACGCACATCTATCAGCCGAAATACAGGACATATGGACAATGTAATTTCACAAGCACAAGCAACACTAGGAGCACTTGTCTTCCAACGTTCGACATTTGGTGGTATCAATTCAAAGCTCGGCAATGTGAGCAGTCGCCTCCCAACGGTAAAT
Gma.16431.1.S1_s_at	CF922505	At4g02080	1e-103	Intracellular Traffic			CAAGATTGACATTCCATATGCTGCATCAGAAGAAGAGCTACGTTATCATCTAGGCCTGACCAATTTCACCACNGGGAAGGGGAAGGTCAACNTCACGGAGTCGAACCTTCGGCCNCTAGAAGTGTTCATGTGCAGCATTGTNCGCAAGATGGGATATGGAGATGGCTTCCANTGGGTCTCTCAATATATTAAGTAGATTCTGGCATCATTTCCC
Gma.7064.2.S1_at	BU544245	At4g02080	3e-54	Intracellular Traffic			TCTCTCTGACGAGTCACTAGCAAATGTGCCTTTCCTCATCTTGGGAAACAAGATTGATATACCTTATGCTGCTTCAGAGGATGAANNACGTTATCATATGGGCCTCACTAACTTCACCACAGGCAAAGGCAAGGTTAATTTGGTTGACTCCAATGTTCGTCCTTTGGAGGTTT
GmaAffx.87115.1.S1_at	BI970509	At3g60860	3e-25	Intracellular Traffic			TTGTTGTGACCACTCTTCAAGCTATTTGTAATTTGGGAGAGATATCTTTCGAGAAGAACCTGGCTCATTTTTTCCCTCTCCTCTCAAGCTTGATAAGTTGCGAACATGGATCAGCTGAGGTTCAGGTAGCTCTCAGTGATATGCTTAGTTTATCAGTTGGTCCTCTTTTGCTACGGTCATGCTGATTGATTACGTTAAGATCGACAATGAATTTTGAGATATAGGATATTTTTCCTCTAAATCTCTTTTGTTCATATTTTCCTCCTTTCCTTTGCCTCGGGTTACTTGCAAAAGTATAGTTCGATAGTGTTTGAATAGTTGGCAGTGATTTTGTGTTTAGAATACCTTCCCGGTCCTTCTATATTTTAGAAGCCTAAGATTACCAATCCGAATTGATCT…
GmaAffx.87115.2.S1_at	AW756094	At3g60860	1e-114	Intracellular Traffic			ACAGGGATCCTGCTGAGTCTGGCTCACATGATAATTTAGAAAGCCCGAGGACTCAAAATCTTTATGCATATTTTTCTGATGCAAAGTGCCGAGCTGCTGTTCANCTTTTATTGATCCAGGCGGTGTTGGAGATCTATAACATGTACCGAACTCAACTTTCAGCAAAAACTATACTTGTCTTGTTTGAGGCTTTGCGTGATGTGGCATTACATGCTCACAAGATTAACAGCAATATTATTTTACGTTCAAAGTTACAAGAGTTTGGCTCTATGACTCAAATGCAAGACCCTCCACTGTTACGCCTGGAGAATGAATCCTACCAAATATGTCTCACATTTTTACAGAACCTCGTTGTGGACAGACCTACTAGTTATGAGGAGGTTGAGGTTGAGACACGTC…
Gma.6172.1.S1_at	BI426133	At3g46560	8e-37	Intracellular Traffic			GGTTTGGTTTCTACCGCATATCGCAGTTTCNNNNNNCANNNNNNNNNTNTCTGGCAAAACCCTNNTCGANGGTGACCAATCGGTGGATCAAACATGGACAAGAGCATGNTAGCGGATTTGGATTCGCTNCCTGAGGCTGATAAGCAAAGAATGACTGTCATGATCGATCAGCTCCAAATNCGTGACAGTCTGAGAATGTATAATTCACTGGTTGAGAGATGCTTNANTGATTGTGTTGACACATTTAAGCATAAATCCCTGCAAAAGCAAGAGGAAACCTGTGTTCGAAGATGTGCAGAGAAATTTCTNAAGCATTCTATGCGGGTTGGCATGAGGTTTGCCGAGCTCAACCAAGGAG
Gma.15124.1.S1_at	BU548348	At1g27970	3e-57	Intracellular Traffic			CAACCGGAACGGTTTAGCGAATCTGTATCAGGAGGGTTCCATGCTGACCTTCGAAGGGCAGAAGATCCAGGGCGCTTCCAGCATCGTCGCTAAGCTCACTTCCCTCCCTTTCCAGCAGTGCCACCACTCCATCTCCACCGTCGACTGCCAGCCCTCCGGTGTCAACGCTGGCATGCTTGTCTTTGTCAGCGGCAACCTCCAGCTCGCTGGCGAACAGCACACTCTCAAGTTCAGCCAGATGTTCCATTTGATACCAACGCCTCAGGGAAGCTATTATGTGTTGAATGACATATTCCGTTTGAACTATGCATGAAGATAGACCATCATATGACCTGAAAGGCCATAGATGAAGTTTGCCTATAGCTAGCTGTTTCAGATTGCACATTTGAAATTGAAAAT…
Gma.4853.2.S1_a_at	BU547313	At5g56290	1e-171	Intracellular Traffic			ATGGAACAAGCTGGGTGCAACACAAGCAAACAGTGTTCAAAGTGCTGATGCAATAATGGCTTATCAACAGGCNCTGGATTTAAAGCCTAATTATGTNCGTGCTTGGGCAAATATGGGNATCAGTTATGCAAACCAGGGTATGTATGACGAGTCCGTTCGTTATTATGTTCGAGCACTTGCCATGAATCCAAAAGCAGAGAATGCATGGCAATATTTGAGAATTTCGTTGAGCTGTGCTTCTAG
Gma.1450.1.S1_at	AF532625.1	At1g16920	2e-99	Intracellular Traffic			GTGTATGATGTCACTCGCCATGCAACATTTGAAAATGTTGACAGATGGCTGAAAGAATTGCGGAACCACACAGANGCCAACATTGTTGTGATGCTNGTNGGNAANAAATCAGACCTTCGTCACCTNGTAGCNGTGTCAACTGAAGATGGGAAGTCCTATGCTGAGAANGAATCACTTTACTTCATGGAAACCTCAGCTCTGGAGGCTACTAATGTAGAGAATGCNTTTGCNGAAGTTCTGACTCAAATCTANCNCATTGTTAGCAAGAAAGCAGTAGAGGNGGCTGAAAATGGAACNNCATCTGTGCCTGCCAAAGGAGAGAAAATTGATCTGAAAAATGATGTNTCTGCTTTGAAGAGAGTTGGTTGCTGCTCAAGCTAANATTGGAAAACATAGTTC…
Gma.15310.1.S1_at	CD399486	At1g52280	1e-106	Intracellular Traffic			GGCATGGTGTGCTTCAAAGGGAAACATACCATACTTTGAGACCTCAGCAAAAGAAGGATTTAATGTTGAAGCTGCTTTCCAGTGCATAGCAAAAAATGCACTCAAGAATGAACCTGAAGAAGAAATGTACCTGCCCGACACAATTGATGTTGGTGGTGGTGGACGACAGCAGAGATCTACTGGCTGTGAATGTTAAAGTGCAGAGAATTCTATGGACTAGCTTTAGTTGCTTGTTTTTTGCCAAAATACAAGCGATCCTCATGGATTATTAGCCTGCAAGTACTTTATTACCTATGCAAAACCAAGGACAAAATTCCAAATTNTATTTTGTATCTATCTAGTGGATTAGATGTCCAACATGTTTATTTTTCTTCTATTTATTCTTCTTTATCTTTAATG…
Gma.1814.1.S1_at	L14929.1	At3g11730	1e-88	Intracellular Traffic			GGACAGGAGCGATTCAGGACTATAACAAGCAGTTANTATAGAGGAGCACATGGAATTATTATTGTCTATGATGTTACTGAGATGGAAAGCTTTAACAATGTCAANCAGTGGTTGAATGAGATTGANAGATATGCAAATGACNCTGTATGCAAGCTTCTTGTGGGGAATAAATCNGATCTNGTTGATAACAAGGTTGTNGACTCNNTAACNGCCAAGGCATTTGCAGATGAGCTTGGTATCCCTTTCCTTGAGACAAGTGCTAAAGACTCAATCAATGTGGAGCAGGCTTTCTTGACCATGGCAGCAGAGATTAAGAAGAAGATGGGAAGCCAAACAACTACTGGTAAGTCGGCAGAAAGTGTTCAAATGAAGGGGCAACCAATCCCACAGAAGAGCAAC…
Gma.4268.2.S1_a_at	AW569523	At3g18820	4e-62	Intracellular Traffic			GAAGAACTCTCTTGAAGGTCATCATTCTCGGTGACAGTGGGGTGGGGAAGACATCTTTGATGAACCAATATGTGAATAAGAAGTTTAGTAATCAGTACAAGGCAACCATTGGAGCGGATTTTTTAACCAAAGAAGTGCAATTCGAAGATAGGCTTTTCACCTTACAGATTTGGGATA
GmaAffx.89819.1.S1_s_at	CK606604	At3g18820	2e-64	Intracellular Traffic			TTTCTGATTCAAGCAAGTCCTTCCGATCCAGAGAATTTTCCTTTTGTTGCCATAGGAAACAAAATAGATATTGATGGTGGAAACAGCAGAGTGGTGTCAGAAAAGAAGGCTCGGGCTTGGTGTGCGTCAAAAGGAAATATTCCATATTTTGAGACATCTGCCAAAGAAGGTATTAATGTTGAAGAAGCATTCCAATGCATAGCAAAGAATGCCCTGAAAAGTGGAGAAGAAGAAGAATTATACCTGCCAGACAATTGATGTTGGAAACAGCAGTCAGCCACGGGCAACAGGATGTGAGTGCTGAATGTATAGGTTTTCTCTTCAATACAATAAAGTACATTACTTCAAATTGATTTCACTGTGTTTAGCCATTGCTGTCTATGTGGAGGCATCATTGTA…
Gma.1887.1.S1_at	CA800104	At1g02130	1e-105	Intracellular Traffic			GGAATTCGCAGATCAAATTGGCATACCTTTCATGGAAACAAGTGCAAAAGATGCTACAAATGTGGAAGATGCTTTCATGGCCATGTCTGCTGCCATCAAGAATAGAATGGCTAGTCAGCCTTCAGCAAACAATGCAAGGCCTCCAACAGTGCAGATCAGAGGGCAACCTGTTGGACAAAAAAGTGGTTGCTGCTCTTCCTAACCAGGTGGTGCTGCTTGGTCTACACTTACCTTTTGCATGTAAGGGGCATATGCTATTTCACTAAATAGTGGACCAGTGTCACGTAATCCAACCTGTGGTTTGGGAATTGGCCTAGATGATCCCATTCTTTACCATATACTTGAATGCTATGATTGTGCTTAGTACTTGTTAATGATAAAACTTTTATATTTCTGCTN…
GmaAffx.93378.1.S1_s_at	CF809103	At1g02130	4e-11	Intracellular Traffic			AACAGTGCAGATCAGAGGGCAACCTGTTGGACAAAAAAGTGGTTGCTGCTCTTCCTAACCAGGTGGTG
GmaAffx.69526.1.S1_at	BQ453506	At3g54300	3e-24	Intracellular Traffic			CTGCCGTTGTGTCTTTCAGTCTTCGNTGGATCATCTTCACAATCACATCATCAGAACACAAAGAAGAGAAGAGACCCTTCATCTTGTTATTCCACTCGGGCTAGGCCAATTTTCCCTCTAACAGTCAATTTTCATTCAGATTCGTNNNTTTCTCGATTAGATCACGAGGTGTTGGTGTGATTGTTTGTACCTTCTGGTGGTGGAGCTTGTTGGAAATTGGAGATGAGTCAGAGGGGTTTAATATATAGCTTTGTTGCCAAAGGAACTGTTGTTTTAGCAGAGCACACGCAATATACGGGGAATTTCAGTACCATTGCTGTTCAGTGCCTGCAGAAACTGCCTTCAAATA
GmaAffx.5717.1.S1_at	AW596033	At4g15780	3e-89	Intracellular Traffic			GAACATTGATAAGGCCATTGATAGAGGAGAAAATCTAACTATTCTGGCGGACAAGACAGAGACTNNNCACTCACAAGCCCAGGAATTCAAAAAGCAAGGAACTCATGTCCGTCGGAAGATGTGGTATCAGAACATGAAAATNAAATTGGTTGTTCTTGGAATTTTGTTGCTTTTGGTCCTGGTTATCTGGCTTTCTGTTTGCCATGGATTCAACTGCGCAAACTAGNAACAAATGAAAGNNNNNTTTATGGATAGNNNNTTAAATGATANATGATNTNTAAAGAGCAATTTCTTAAAAGNTTTAGCAAGAATCTGCTTAGAAGGGGGNAGTTTGGCAACNGGAGAAAAAGTTTCCTACCTTCTTTNTTNGTTGATAATNATATACGATATTCTTGGAAA…
Gma.10915.2.S1_s_at	BI424428	At2g33120	5e-95	Intracellular Traffic			GAGGGAACATATGCAGTACTGTGTTGATCATCCTGAAGAGATAAGCAANCTTGCAAAGGTGAAAGCTCAGGTTTCTGAAGTTAAGGGTGTCATGATGGAGAATATTGAAAAGGTTCTGGACAGGGGTGACAAGATAGAACTTCTGGTGGACAAGACTGAGAACCTTCATAACCAGGCACAAGATTTCAGGACTTCTGGAACCAGAATCCGTCGAAAAATGTGGCTGCAAAACATGAAGATNAAGCTGATTGTATTGGGAATATTGATAGCACTTATCCTGATAATAGTCCTATCTGTGTGTCGTGGGTTCAACTGTGGAAAATAGCACCATTCTCCGAGGCCTTTTATCATGTTATTTCAACCTTGAGATTATCGGAGAAAAGATACTAATGAATGGCA…
GmaAffx.92436.1.S1_s_at	CF806104	At4g09160	7e-54	Intracellular Traffic			GAACAGGAATTCACCTCTGCTTACCCTGTTACGGAGTTTACTATTAAACCCGCTACCAAACATTCTGTTGAGTTCCCTGTTTCTGAGAAAAGCCATCTTGTTTGGGAAATCCGAGTGGTGGGTTGGGATGTCAGCTATGGAGCTGAATTTGTGCCCAGCGCTGAGGATGGATACACTGTCATAGTACACAAGAGCAGGAAAATTGCTCCCGC
Gma.10971.1.S1_at	BI969499	At2g20840	2e-84	Intracellular Traffic			GAATTCCTGGAGCATATGTCTTGTGGTATCGCCCATTATATCGTGCTTTTAGGACTGACAGTGCTTTGAATTTTGGATGGTTTTTCTTGTTTTACCTGCTTCACCTAGGATTCTGTATCTTAGCTGCAGTTGCTCCTCCCATAGTTTTCAAAGGAAAATCCTTGACAGGCATTCTGTCAGCCATAGANNTGGTGGGTGACCATGCAGTGATTGGAATTTTCTACTTTGTTGGATTTGGATTGTTCTGCATTGAAACATTGATCAGTNTCTGGGTTATTCAGCAAGTATATATGTACTTCCGTGGCAGTGGTAAGGCTGCTGAGATGAAGCAGGAGGCTGCAAGAGGAGCANTGAGGGNTGCAANATGATAAATTACNTTGTNAANCCCTGTGTTTGAAT…
GmaAffx.90362.1.A1_at	CF806087	At1g11890	5e-29	Intracellular Traffic			AAACTATGGTGATCGAGCTCAGTATGAAATTTAAAACCTGGATTCTGTGGCTTCTTGCTTTTCTCACATGATTATCCAGATTTGCACAGATTGGTGGGAACCCTTTATGCATGAGATGATGTCAACTTTTTCTTGACAACTTCGGTTTAGAAAAAAAAAAAGACTATCCTTTGTTACATCTGGATCAGTCTTTCTGGAACAGGAACCTTTTGACCTTTATAGTAAGGAGCCAGGATATGAGAAAACTTTATCCCCGTGGGGATGCATGTAGGCATTTCTTCTTTATACTTCTCAA
Gma.2319.2.S1_at	BG653402	At1g19440	0	Metabolism			AAGAAATCCATGCTCATTCCCAATTGCCTATTTCGTGTGGGCTGCTCTGCGCTGCTTCTCTCTAACAAGCCGGCAGATCGAAGGAGGGCCAAGTACCGGCTTGTCCACGTCGTGAGGACTCATCGCGGGGCCGACGACAAGGCGTTCCGGTGTGTTTACCAGGAGCAGGATGATGCTGGGAAAACTGGTGTTTCCTTGTCTAAGGATTTGATGGCAATTGCTGGTGGAGCATTGAAGACTAACATCACCACACTTGGTCCTCTGGTGCTGCCAATTAGTGAGCAGCTTCTGTTTTTCGTGACTCTGCTGATGAACAAGTTATTTAAGGCTGGTGTGAAGCCTTACATACCGGATTTCAAGCTTGCATTTGATCATTTTTGTATCCATGCTGGTGGCAGG…
GmaAffx.78561.1.S1_at	BQ452483	At2g36750	1e-18	Metabolism			AGGAGGATCTTCTCACTTCAACGTAACCCAGCTAATACAAGATATCATGCAACAGTCCAACAAAGACTAGTACTAACGATCATCTTCGGTTATCAAAGGCATATTAATATATATACACTATTTCAGAAGAAGTTCCTAATTAGCTTGCAGAGGGTTGTAACATATACTGTGTGGCAAGCCTGTGAAGGCTCGAGGAAGAAGAGTATCCTGTGTAAACTCGAGTGATTACTGTAATAAATTNAATNCCTANCTGGAAACAAAGAATGGATATAATCATATAGACTAAGGATTTGAGGGTGAAATATACCTTGAGCTAATTGAAGTTTTAATTTTATATGTTTGATATCAAGTTTAAGCAAGGCCACCTTGAAGGACTAGGGAGGCAAGAAACAAATTTAA…
GmaAffx.92921.1.S1_at	CF807404	At3g02100	2e-39	Metabolism			TTGGGCACCCCAGAAGAAGATATTGAACCACCCTGCATTGGCTAGCTTCATTAGTCACTGTGGTTGGAATTCTACCCTAGAAGGTATATGTGCCGGTGTACCTTTCTTGTGTTGGCCATGCGCCACTGATCAATATCTTGACAAGTCATATATATGTGATGTGTGGAAGATTGGGCTTGGACTAGACAAGGATGAAAATGGAATAATTTCTAGGGAAGAGATAAGGAAGAAGGTGGATCAACTGCTTGTTGATGAAGACATCAAAGCTAGGTCATTGAAATTGAAAGACATGACCATAAATAACATACTAGAAGGTGGTCAGTCATCAAAGAATC
Gma.14345.1.S1_s_at	BU544949	At1g31070	1e-105	Metabolism			AGGAATTTGCACCAGTGAAAAATGCAAATGGATCCAATGTTGACACTCCAGACAGTGCGAAACTACTTGTTCTTCGACTCCATACTCGTTGGGTAGTTGCTGCAGGTGGCTTCTTAACACATTCAGTGCCCTTATATGCAACAGGT
Gma.4906.1.S1_at	CD412790	At5g04590	0	Metabolism	Nitrogen Metabolism		TGCTCATCAGTTGGCCATGGAAGTTATCCGTAATTATGTTGCTNCCAACCAAAATGGAAANGGNGAATNATTNCATTTNNACTTANCGAAGGAAGATGTATGTGATGNTGCTTTATGGTTGACAGGAANGGTGGATAGGCNACTGAACACAACTCTGTTGTTACTGTGTNGTAACTCNNGGGTTNGNCTAAACTAATGTTTGGGTTNTTTNNTNTTTTTTATNTGAAACGGCTTTCCNTAGAATCTTTTGGTTCATCATTTNGATCGAGTTTCTGAACANAAAATAAGCCTTTCTGTCATTTCTGTATCCAATTTTGGGTGTTCGACAGCTTGGTTTTTCTTCACAATAATCTTGNNNCTAGNNAAGACCTTTTTCCNANNNNNNNNNNNNNNNAATAA…
Gma.1137.2.S1_x_at	CA852403	At5g48930	1e-105	Metabolism			TGCAACCTGATCTAAAAGCTCTCGTTCGCGGGGCTCATACTTTCAAGTGTCCAAATCTTGGTATCACTAGCTGGACTAGGCTTCCAATCCATGATGCTGACTTTGGTTGGGGAAGGCCTATATTCATGGGACCTGGTGGAATTGCATACGAGGGCCTGTCTTTCATAATTCCAAGCTCAACCAATGATGGGAGCTTATCTGTGGCCATAGCTCTTCAGCCCGACCATATGAAGGTGTTTAAGGATTTCTTGTATGACATTTGAGGAATCATTGGCTGTCAGCCATATGGAACGCCACAATGTTTCTAGGTGGTGTTTTTATCCCCCCCGGTACCTTTTGTTATCTTTAGATGCTTTTGACCAACGGTATGCAACTGTTAATGGGACTCATTTCAGTTTT…
GmaAffx.62471.1.S1_at	AW203420	At5g61160	1e-12	Metabolism			AAGCCTCTTGGTTTGGGATCTGCAAGCTCCAGAAGATGCAACTAGAGGCATATTTCAATTGTCTCGTTCGGATATTGAAAAGCTGAAGCAAATAGTGGTGTCCAAGAAGAAAGGGAACAACACCAACCTTCGCTTGTCAACCTTTGTGTTGTCTATTGCCTATGCTTGTGTTTTCAGGGTGAGAGCAGAGGNAACAAAGAACAAGAGAGTTATGTTGGCTTTGAATGTTGATTGCAGGGCACGTTTGGAGCCACCTNTTCCACCAACATATTTTGGAAACTGCGTTGGAGCGAGACTTGCAATTGCTGAAA
Gma.5790.1.S1_a_at	BU549012	At5g23670	0	Metabolism			GATCCATATAATTGTTCTCAGATTCAAGTGAACGTCTCTTGGAGGGAAGTCTGTTCTTATTTTGCCCAGTCATTAGATA
GmaAffx.86815.1.S1_at	BI701744	At3g50560	5e-16	Metabolism			AACGAATGCTTCTTGTAAGGGAGGCAATGATTCAGACATACCAAAGACATCTCACCCCCTTCCTCCAAAACGCCAATCTTCTCCTCTCCACATCTTAAATATCCCCCTCTTTCTAAATTCCACCAACCACTTTCTTGCTTTCACTTCCAATTCTCAATTCCTCTTTATTTGATTCTGGGTTCTTTTTTTGTTTTTTGCCATACACATAATTGTCTAAAGGGAGAAAGAAAAAGAGAGATGCGAAGCATGGCAAGCTCCGCTTCCTCGCGAGGCATTGCAGCTATCGTCGGTGTGGGCCCCAACCTCGGCCTCTCCATCGCTCGCAAGTTCGCTCACGAGGGCTACACGGTTGCCATCCT
Gma.406.4.S1_s_at	BI942914	At4g01850	1e-62	Metabolism			GGCACAAGAAACCTTTCTATTCACATCTGAATCTGTAAACGAGGGTCACCCCGACAAGCTGTGCGACCAGATCTCTGATGCAGTGCTCGATGCGTGCCTTGAACAGGACCCTGACAGCAAGGTTGCCTGTGAGACATGCACCAAGACCAACATGGTCATGGTCTTTGGAGAGATCACAACCAAGGCCAACGTAGACTATGAGAAGATTGTCCGTGACACATGCCGCGAAATTGGATTCATCTCTGATGATGTTG
Gma.5536.1.S1_at	BU550770	At5g40650	1e-128	Metabolism			GTACAAGAGTATCGAGCCGTGGCTCAAGAGGAAGAACCCACCGGAGCCGGGGAAGGAGATTCTACAGAGCAAGAAGGAGAGGGAGAAACTCGATGGGATGTACGAGTGCATACTGTGCGCCTGCTGTAGCACGTCCTGCCCCAGCTACTGGTGGAACCCCGAGTCCTACCTCGGTCCCGCCGCGTTGCTCCACGCTAATAGGTGGATAAGTGACAGTCGTGATGAGTACACTAAGGAGAGATTGGATGCCATTAATGATGAATTCAAGCTCTATCGCTGCCACACCATATTGAACTGTGCTCGAGCCTGCCCAAAGGGGTTAAACCCAGGAAAGCAAATCTCACATATCAAGTCACTTCAGCCTAAAGCATAAAATCCTATTGTTAGAGGCATGATGAT…
Gma.6019.1.S1_at	AI431179	At2g20420	1e-153	Metabolism			GGGTACTCCTGCCAATTTTCTGGATGTAGGTGGCAATGCCTCTGAAAACCAGGTNGTTGAGGCATTTAAAATATTGACTGCTGATGACAAAGTGAAGGCAATTTTGGTTAACATTTTTGGNGGTATAATGAAGTGTGATGTTATAGCAAGTGGAATAGTGAATGCTGCAAAAGAGGTTGCACTGAAAGTACCNGTNGTAGTTCGTCTGGAAGGCACCAATGTTGATCANGGAAAAAGAATNTTGAAGGAAAGTGGTATGGCNTTNATAACGGCTGAAGATTTAGATGATGCNGCTCAGAAAGCAGTGAAAGCTGCTTACAAATGAAGGNTTACTTCTGCTCAAATTTAAAATTCAGTTTAGTTGCAACATTATTTTTGGTGTTAAAACATATTTTCACG…
Gma.3032.1.S1_s_at	CD397802	At4g02280	7e-66	Metabolism	Sucrose Biosynthesis		AATACGTTTCCAAATTAGAGAGGCGTGAAACTCGACGATATCTTGAGATGTTCTATATCCTCAAGTTCCGTGATTTGGCAAATTCTGTTCCGCTTGCAAAGGATGATGCAAGTTAAGTAGCTATATATATATAATTTCACCAAGGCTTGACAGCAGACATAATAAGAGTCATATATGTAAATATAAAAGTCTGCTTCTCGTGTTTTGAAATCTTGTGATGCGACCTAGAGGAGTTTCATGGAAGACTTGTCTATGTTAACTTCGATTATGTATATGCAAGAGATGGCGAGCAATTGTTGTTGAATTTGGATGTCTCTTGTTTTCGTTTGATTAGCAGTTATCAAAGATCTAGACCTGGGAATTACCTGTGAGGATTGTTATCCTTACTGATGGGTA
Gma.17145.2.S1_at	CD396752	At5g66760	0	Metabolism			TGGGAGAGCTTCCATGATGTCCAGGTGAAGGACCGCAGTTTAATCTGGAACTCNGACTTGATTGAGACTATTGAATTGGAAAATCTTTTGATAAATGCATGCATCACAATGTACTCTGCTGAAGCTAGGAAAGAGAGTAGAGGAGCTCATGCCCGTGAAGACTTCAAGGTTAGAGATGATGGNANCTGGATGAAACACACTGTGGGATTCTGGGAGAACGAGAANGTCCGGTTGGACTACAGGCCNGTGCATTTGAATGTATTGGATGATGAGGTTGAATCATTCCCTCCCAAGGCTCGGGTGTATTA
Gma.8179.1.S1_at	CD413439	At3g18860	1e-123	Metabolism			GTACTAAAGATGTCAGCAACCAAGATCATTGTTTAGAGTGTAAAATTGACATCTTTCTGCTGATGGTTGTGCGTTTGTTTTCAATTTCAAAACAANGAGCTGTTGCATTTTAGAGGATTCATTGAGAGTGACACATCAAAAGTAACCTCACAATTACAGATTTCCACCGTTCCTCCGTACTTTGAGACAATAGTTGGAACTTGGAAACCCATGACATGTTATCAGATAGATTGTGTAAACCANTTGAGCAANTTACAGCAACGATGTAGTCTTCCTCTC
Gma.2688.3.S1_a_at	BE555952	At5g51060	2e-58	Metabolism			AGGGTTCATTTGACTGGTTCAAAGGGGTAATGAACGAAGTGGCAGAAGAGGACCGAAGGAAAGTGATTGAACTCCACAGCTACTGCNCCAGCGTCTACGAAGAGGGTGATGCTCGCTCTGCTCTTATTGCTATGTTGCAGTCCCTAAACCATGCAAAGAATGGAGTGGACATTGTCTCTGGGACACGAGTCATGTCTCACTTTGCAAAACCCAATTGGCGCAGTGTCTACAAGCGCATTGCGCTTAATCATCCAGATGCCCGAGTTGGTCAGTTCCCACCCCTTCTACTCACGTTGCGTCTGCTTTTTGCTTTTTTCCAAATTCATTAAATTGCAATGCAGGGGTATTTTACTGTGGGCCATCAGCCCTCACCCATGAGCTTCGTCAGCTAGCATTGGA…
Gma.10216.2.S1_at	BM085697	At5g54160	2e-20	Metabolism			ATAGCTGCTTTGTTTGGTACATTCATTTCATATCATGGCTCCATCATTGGAAACCAGTAACGGTGAAGCCATGCACCTTAAACAGGTTGAAGAAGAGCAAGATGGTATACTTTTCGCCATGAACATGATGTCTACCATGGTGTATCCGTTTGTGGTTCGGACCGCGATTGAGTTAGGGATCTTTGACATCATAGCGAAAGCCGGTGAAGGTGCGAAGCTATCAGCAGAGGAGATTATAGAGCAACTTGGCACAAAGAACCCTGAAGCTCCCACGATGTTGGACCGGCTTCTCAGGTTATTGGCTAGTCACTCCATGCTATCTTCCTCTCTTGATACTGAAGATCTCCAACATGGCCAAAACTCTCCTAAGAGGCTCTATAGTCTTACCTATGCTTCCAA…
Gma.6550.1.A1_at	CD402638	At5g54160	2e-31	Metabolism			TGAGGCACTTCCAGACAATGGGAAGGTAATTGTGGCAGAATGCATTCTTCCAGTGGCTCCAGACTCTAGCTTGGCCACAAAAGGTGTGGTTCACANTCGANTGTGATCATGTTGGCACATAATCCAGGTGGGAAAGAGAGNACAGAGNNAGAGTTTGAGGCTCTGGCCAAAGGGTCTGGATTCCAAGGTTTCCGAGTCCTGTGCTGTGCTTTCAANACCTACGTCATGGAGTTTCTCAAAAAGGTTTAAGTTCTTTGGCGTGGATTCATAAGTTGCATTTGAGTTTTGACTTTGAGACTCTGCATGTGGTGCTACTTACAAAAGCTTTCCCGGAAAAATGTAAATTTCTCTTAATTCATTAGGAAAAGAATAATAAACAAGTTCAATGTATACTGCCTT…
Gma.6550.2.S1_s_at	BM086044	At5g54160	2e-51	Metabolism			CTTGAGCTTGATCTGTTGGAAATCATAGCCAAGGCTGGCCCTGGTGTTCANCTTTCCCCCNCNGACATTNCTTCTCNGCTCCCAACACANAACCCTGATGCACCCGTTATGTTGGACCG
Gma.9622.1.S1_at	BQ610840	At5g54160	2e-48	Metabolism			TGAGGCACTACCAGATAATGGGAAAGTGATTGTGGCGGAATGC
Gma.9622.1.S1_x_at	BQ610840	At5g54160	2e-48	Metabolism			TGAAGAACTGCTATGAGGCACTACCAGATAATGGGAAAGTGATTGTGGCGGAATGCATTCTTCCGGTGGCTCCAGACTCTAGCTTGGCCACAAAGGGTGTGGTTCACATCGATGTGATCATGTTGGCTCACAATCCAGGNGGGAAAGAGAGAACAGAGAAAGAGTTTGAGGCTCTGGCCAAAGGCTCTGGATTCCAAGGNTTCCAAGTCCTGTGCTGTGCTTTCAATACCTACGTCATGGAATTTCTCAAAAAGGTTTAAGTTCTTTGGCGTGGATTCATATCAAGTTGCATTTGGATTTTGACTTTGAGACTCTGCTTGGGGTGCTACTTACGAATGTTTTCCCGGAAAAACGTAAATTTCTTCTAATGCTTTATGAAAAGAATAACGAACAAGTTCA…
GmaAffx.16986.1.A1_s_at	AW351116	At5g54160	8e-13	Metabolism			CAAATGCTGCTTGGAAGGCCGTTTCCCAAACGGATGTTCTGATGATGACTCAAAACCCGGGAGGCAAAGAGCGATCTGATCAAGAATTCATGGATTTGGCAACTGCAGCTGGATTTAGTGGCATCAGATATGAATGCTATGTTCGAACCTTTTGGATCATGGAGTTCTTCAAGTAAACAACCATATACTACTCTGCATGCCCCTTTATGCTTTTCGTCATT
GmaAffx.45805.2.S1_at	CA784263	At5g54160	2e-50	Metabolism			GCAACTAGCCAGTGCCTCTGTACTCCCTATGGTTCTCAAATCAGCTCTTGAGCTTGATCTGTTGGAAATCATAGCCAAGGCTGGCCCTGGTGTTCATCTTTCCCCCACTGACATTTCTTCTCAGCTTCCAACACAGAACCCTGATGCACCCGTTATGTTGGACCGCATTTTGCGGCTCTTGGCTTGCTACAATATCCTTTCTTTTTCTCTCCGTACTCTCCCTGATGGCAAGGTTGAGAGGCTCTATGGTCTCGCCCCCGTTGCTAAGTACCTGGTCAAGACCGAAGATGGTGTCT
Gma.12517.2.S1_at	BM522681	At1g12000	1e-158	Metabolism			AGTCCCACTTTTTCGGCTATGAAGGGAGATGTGGCTTGCCAACTAATTTTGATTCTACTTACTGCTATGCATTGGGTTATGGTGCTGCAGCCCTNCTTCAAAGTGGGAAGACTGGATTAATATCATCGGTTGGTAATTTNTGTGCTCCTGTAGAAGAATGGACTGTTGGTGGAACTGCACTCACTTCATTGATGGACGTGGAGAGGAGACATGGTAAATTCAANCCNNNNNNNAAGAAGGCAATGGTGGAGCTTGAAGGGGCACCCTTCAAAAAGTTTGCCTCCTTGAGGGATGAGTGGGCCCTAAAAAATTGCTACATTAGTCCAGGT
Gma.3572.1.S1_at	AW310006	At5g14800	1e-106	Metabolism	Amino Acid Biosynthesis/Metabolism		AACTGGCCTGAGTGGCAGTGGTCCTGCTTATGTTTATTTAGCAATAGAGGCTTTGGCTGATGGAGGAGTAGCAGCTGGTTTACCACGTGATCTTTCATTAAGTCTAGCTTCTCAAACTGTATTAGGGGCAGCATCAATGGTCTCCCAGACTGGGAAGCACCCGGGACAGCTCAAAGATGACGTTACTTCTCCAGGTGGGACAACAATTACGGGCATTCATGAGTTAGAAAATGGTGGGTTCCGTGGAACACTGATGAATGCTGTTGTTGCTGCTGCTAAGCGCAGCCGAGAGCTTTCCTGAATCAAGAGATTAGGATTCTACTTTTTTTTTAGACCAAAATCTGATTTCGGTCGAATTTTCAGTCACTATTATGAGAACTTGGGGCTCTTCTTTGAGAG…
GmaAffx.90369.1.S1_s_at	CF807463	At5g17380	0	Metabolism			TTAGTGCTATGGAAGTTGAGACGTTGGTNCGGTACCAGCTGCCTGTGGTCGTGATTGTTTTCAACAATGGTGGNGTATATGGTGGTGACCGTAGACNCCCAGAGGAGATAGATGGACCTCACAAAGATGATCCTGCCCCCACAGATTTTGTCCCAAATGCAGGNTACCATGCTTTGATAGAAGCTTTTGGTGGAAAGGGCTATCTTGTTGGGACGCCTGATGAACTAAAGTCTGCTCTTTCAGAATCCTTCTCTGCTCGGAAACCAGCCGTAGTAAATGTTGTGATTGATCCCTATGCTGGTTCAGAGAGTGGGAGGATGCAACAT
GmaAffx.90704.1.S1_at	CF806530	At5g54960	1e-85	Metabolism			TGCGGTGTGGGCAAAAGACCATTATCTTTCTGGTCAACAATGGCGGATACACCATTGAGGTTGAAATTCATGATGGGCCATACAATGTGATTAAGAACTGGAACTACACTGGGTTGATTGATGCAATCCACAATGGTGAAGGGAAATGCTGGACTGCCAAGGTGTTCTGTGAAGAGGAGCTAGTTGAAGCAATTGCCACAGCCACAGGACACAAGAGAGACTCCTTATGCTTCATTGAGGTGATTGTTCACAAGGATGACACCAGCAAAGAATTGCTTGAATGGGGCTCACGAGTCTCTGCTGCCAATAGCCGTCCCCCCAATCCTCAGTAAACTTCAGATGTCGGCCTATGATTAAATTGCTGCAATTGCCCTTTAGCTCTATGAAATTGAGAATCAT…
Gma.10016.1.S1_at	CA852632	At1g59900	1e-106	Metabolism			AAGAAGTTGACGAAGCCATTGCTAAAGCAAAGGAGAGTCCAATGCCAGATCCATCTGATCTATTTACCAATGTCTATGTTAAAGGTTACGGAGTTGAGACATTTGGTGCTGATAGGAAAGAAGTGAGAGCTACTTTACCATAATTCAGAACTTTGTCCTTTGAATATCTTGCCACCTTGTCGTAGCAGACTCTTCAAAATAGTGAAGAATAAAAGGTTCTACAGAGGGTCATCTCTCTCCCCTATTCGTTGAGTTTCTGCCCGCGTGTATAGTGTGAATTTATTCATATGCTTGGTTAGCAATGGGGCGGGGTTTGTTATTTTTTTGTCATGTAATATTTGCGGATCTAACAGCCAAAGCATCATTGTGATTGATGCAACTGGGGTGTTCTGCAAATTT…
Gma.1111.1.S1_x_at	AW203448	At1g59900	1e-117	Metabolism			GGAAAGTCAAATGCCAGAGCCATCTGATTTATTTACCAATGTATATGTAAAAGGCTTNGGTGTCGAGGCTTGTGGCGCNGATAGGAAAGAANTTAGNGCTANTTTGCCCTGATGGAAAACTTTTCCTTTNNNTTNNTTNNCCTTAGTTTTGGACNNATCAAAATAATGAAGAATAAAAGGTTCAGAAGATCATCTCTGCNTATTTGTTGAGCTTTCCCCNAATTGTATATGAAATTGATTCTTCANTAGCAATGNGGCNGAAATTAATGNTTTGCCATNTAATTTTGGAGGATCTAACACTCATATGACCTCAATTGATTNNGCANGCAACTAGTNTCCTGCAAATTTGGAGGATTTCGTTATGCAAAACCTCCATGNTTGGCAAAATTTTGCCATTAT…
GmaAffx.88935.1.A1_s_at	CK605567		5.1e-36	Metabolism			TGTCCCTGTCTACTATCCAGCGAAACCACAGCCAAGGGAACGGGCTTGGCGGAATCAGCGGGGAAAG
GmaAffx.32084.1.S1_at	BE823130	At5g57190	1e-138	Metabolism	Phospholipid Biosynthesis		GTGATTTTTCGTTTGGCACCACAGGATTATCACCGTTTCCATTTTCCAGTATCAGGAATTNTTGAGCAATCTGTAGATATCCCTGGATGCTTGTATACTGTGAATCCCATTGCTGTAAATAGTAAGTACTGTAATGTCTTCACGGAGAACAAGAGAGTTNTTTCAANANTTTCAACTGTAGATTTTGGAAAGGTGGCATTTGTTGCAATNGGAGCTACAATGGTTGGTAGCATTACTTTTACAAAGAAAAAGGGCGANTATGTTAAGAAGGGAGATGAGTTTGGATATTTCTCATTNGGTGGAAGCACNGTAATTTGCGTTTTTGAANAGAATTCAATTGCAATTGATGAAGACCTTTTAGCAAATAGCGCCAGATCANTGGAGACCTTGGTTTCTGTA…
Gma.7691.1.S1_at	BI970858	At1g71750	1e-64	Metabolism			ATTTGAAGGTCGACGTCAACTCCCGCCATGTCATCGTGGTCGAAGACATTGTAGATACTGGACATACCTTATCAAAAGTCATTGAGCACTTGAAATCAAAAGGAGCGTCCTCTGTTTCTGTTTGCACTTTCCTTGATAAACCTGCAAGGAGAAAAGTTCATTTTCAGCTGGTGGGTGAAGGGAAATACTACCGGGGATTCGAGTGTCCCAACTATTTCGTTGTAGGTTATGGACTGGATTTCGCCGAACTGTATAGAAATTTACCTTACATTGGTGTCTTGAAGCCTGAACTTTACAAGTGATCTTATATTTCTTAGTGAAACCTGTCACACGTGGTTCTAGAAGTTTTTCTGCCTCACATTCTTCCAAGAGTAGCAGATAGAAACTAGAAGAAAACTA…
Gma.12685.1.A1_at	CD394784	At1g75330	4e-26	Metabolism			TTCATGCATTGCTTACCGGCGGAAAGAGGGGTGGAGGTGACTGACGAAGTTATTGAAGCTCCAAATTCAATAGTCTTCCCGCAAGCTGAGAACCGAATGCATGCACAGAATGCCGTAATGCTTCATGTACTTGCCAAGTAGATAGCTGAATGAATGATCATCTGAGGTTTTTGAGCNATATTAGCGTGCACTCGCNATAGTTGGTTTTAGGCCTTCAGCTAGTGAATACACTTTGCAACNGTTAGTTTTTGGCATTCAGCTGTATGTATGTTCGGTCTAGTAAGTTGGATTTTTGAGTTGCTTCGGTATTATTACTAGCAATTGAAAAACAGGTAAATCGTATACAGATGCTAGTATTGGGTTTTCTTTTTCACTACCACATCTCATTTTT
Gma.10801.1.S1_at	AW309829	At3g54020	1e-108	Metabolism			TTGAATGGGAATTCTGGAGACCCTGNAGATTGGAGGCAGAGAACTCAAGTGAATGGCAAGATCATGGAAGATGGCAATACACTCCATGCAGANTCTGCCATGAATGGTGCATAGATATAGGAGCCTCTGCTGTATAAATTGGATCCACTGCAAAGATTGCTGCTGATGGAAAAGCTGCAACCAACCTTCAATTTGAAGGATTTGTTGTCTGAAACATTCACCTGTTAATTCAAATTAGTACGCCCCAATTTGTACTAGTGAAATTGAAACTGGGTTGTGCATTTCAACATTTTGCAGCTCAGATTCCATGTCATGGTTAAATTATCTATACACCATCAGCATGTGCCATAGAAAAATTTCCATTNCCTCTTTTACCNTACATCATTGATCCCACATGCA…
Gma.6611.1.S1_at	U25027.1	At3g08510	0	Metabolism			TGCCTACCTATCTGGGAGCTTAGAAGTGGCATTCGAGCAATTCCACTGCATAGCCAAAAGGGNGATAAATACAACACTGTAAAGCTTCTCATGCGCTTTGANTTTATTAATAATTGATTCTGTGCAGTGCATGTGCA
Gma.6611.2.S1_s_at	BE805015	At3g08510	5e-77	Metabolism			GCATGGAATGTTCAGAGCCAATGGAGGGTGCGGTTATGTTAAAAAACCAAATTTTCTATTGGAGACTGGTCCAGATGACGAGGNCTTCAATCCTAAAGCTAAGTTACCTGTGAAGACTACTTTGAAGGCAAGGGTTTTATGTCAATCAGCTGCCTCATTCAAGTATCTCTAGTTTAATGTTAACAATTTTCATACGCTTCTTATTCTTAGGTGACTGTATATATGGGGGAAGGATGGTACTATGATTTCAAGCATACACACTTTGATCAATATTCACCTCCAGACTTCTACACAAGAGTGGGGATTGCTGGAGTCCCTAATGATACTATAATGAAGAGAACTAAGGCAATAGAGGATAATTGGTTACCTACATGGAATGAGGCATTTGAGTTCCCTCTC…
GmaAffx.91549.1.S1_at	CF807274	At3g08510	7e-94	Metabolism			AAAGGTACTCGCATTGACTCATCAAATTATAACCC
Gma.9179.1.S1_at	BG157597	At1g75020	2e-48	Metabolism			GGGCTCCCTGTGCTGACAAATGTATTACTACCAAAAACAAAGGGGTTTCATGCTTGCTTGGAAGCTCTGCGAGCCTCATTAGATGCAGTATACGATGTGACAANNNCATACAAGAATCAGTGTCCTTCCTTTCTGGACAATGTTTTTGGTGTTGACCCTNCAGAAGTGCACCTGCANGTGCGGCGTATTCCNGTGGAGGAGATTCNAGCTTCNGAAACCAAAGCTGCTTCTTGGTTAATCGACACATTCCAGATCAAGGACCAATTGCTTTCGGATTTCAAGATTCAAGGCCATTTCCCTAACCAACTAAATGAAAATGAAATTTCTAGATTTAAGAGCCTACTCTCTTTTATGGTGATAGTTTCTTTTACTGCCATGTTTATTTATTTTACATTTTTT…
GmaAffx.24049.1.A1_at	BE823952	At2g14260	1e-06	Metabolism			GCCAATGAACCAGGCATAACTGCTGAACTAGTGGCTGCAAATGAGAAATTGAAAAACATAATCAAGAACAAAGGGGACTGAAGTGAGTGGACAGGCAAACAGGAACAAAGGCTGCAGTTTGGAGACCGACTAATCAAATGGTGCAACATTCATNTACAAGCAAAATACTGCAATGTCCATGTATTTAAAAACACTAGCATNCCGTGAACTCAAAGATTGTCTTCATCATTGTCTTAATA
Gma.881.1.S1_at	AW278867	At1g08250	6e-42	Metabolism			ATCAGTCTAACGAAGATCGAGTCACGGCCGCATCGGAACCGTCCGATTAGGCTGGTGGATGACGCGAACGTGGGAACAGCGAAGCACTTCGAGTACTTGTTCTACGTTGATTTTGAGGCCTCCATGGCTGAGGTTAGGGCACAGAACGCGTTGGCGGAGGTGCAGGAATTCACGTCTTTCTTGCGAGTGTTGGGGAGTTACCCTATGGACATGACACCCTGGACACCTTCCTCCCGGGGAGATTAGCATCCCCTTATTTTGTCTTTTTCATCTCTCCCTCCCAAAAGAGAGGAA
Gma.15066.2.S1_at	BG044740	At1g20270	1e-109	Metabolism			GCTCACTATAGTTTTATTCCTGTTGAGCATGGTGAAGGACTTCAAGTTCTGCACTATGAAGTTGGACAAAAGTATGAGCCTCACTANGACTACTTTCTTGATGATTTTAACACTAAGAATGGGGGTCANCGTATAGCAACAGTGCTGATGTACCTTACTGATGTTGAAGAAGGGGGTGAGACAGTGTTNCCAGCTGCCAAAGGGAATTTTAGTTCTGTGCCATGGTGGAATGAGCTTTCTGAGTGTGGAAAAAAAGGACTTTCNATTAANCCNAAGAGGGGNGATGCTCTACTTTTTTGGAGNATGAAGCCAGATGCAACTTTAGATCCA
Gma.12088.1.S1_s_at	BG508802	At1g22950	9e-28	Metabolism			GAGCTGTCCTTCATCGTGGTCGTCATCGCCATGGAGCTAGAGCTACAACATCTGGTAATCGGGTCAACCTACTTCTATGGTGCAGAAGTTCTGTCTTTAGAGAGATGAAAAGGTATCAAAAAGATTTCTCCAACTGGTGTGGCGAGTGCAATCGTGAGAAAAAGGAAAGGCAGCGCTCCACAGTTGCTGCTACCAAATTGGATTTGTTCAGGAGGCAAGGTGAATCCACTGCATAATCTGTTTTGCTCAGTGGATGATTGTAAAATGTACCTGCAATCATTTGTCAATA
Gma.6668.1.S1_at	CD409399	At1g72190	4e-31	Metabolism			AATTGTATATTTCAGGGTGGCCTTCTGGTGAATGTTGCTAGAGGTGGTCTTGTAGACTATGAGGCTGTGATCAACCACCNNNNNNTCNNGTCATTTAGGAGGGTTAGGCACTGATGTTGCTTGGACTGAGCCATTTAACCCTGATGATCAGATATTTAAATTTAAGAATGTTATCATGACTCCTCATGTTGCAGGCGTTACAGAGCATTCTTATAGATCCATGGCTAAGGCTGTTGGTGATGTCGTTCTTCAACTTCATGCCGGGCTTCCTTTGACAGGGATAGAGTTAGTTAACTGAATTAGTGCCAACAATTCATTCCAGTATCTTCAACTAAATGACTTTTATAATTCAAGATGAATTTTCTGAGGTGCAAAAACACTTAATATTTTGTAAAGAAA…
Gma.9592.1.A1_at	BU548303	At4g09670	6e-25	Metabolism			AAACCGGCTTTAATGATCTTGTCACAGGGTGGGATAAACAGCCAAGTAAGCATACAGTAACCACTGATCTCCCTCAGGAGGCTCTTTTGATTAGAGAATTTGCCCGGTTGGTCGCAGAAATCAAATTCAAAAACTNNAAGCCTGACAAGAAGTGGCCAACAATTACTAGGAAAACACAGCTGGTATTGGATGCTGTGAAGGCTTCTATCCAGAGGGGTTTTGAGCCTGTTCAGATTCAGNNGNNAACAAGTCTCGCCACTGTGTCTGATTGTCTACCCTGCTGGAGTGACACGATCCTTTTTCTGTTGTGCATTGATATTCCAAATAAAATTCCATTCTACATTGTATGTATTTGTGAGCTGTTCATCTCTGCAATGCGGTGGGAAAACAGGTTATGTA…
GmaAffx.90006.1.A1_at	CF805731	At3g12120	7e-38	Metabolism			ATTAATGTAGCCGAGGCTTCTTTGAACTTTCCCTTGTGACTGTTTAGTATCATGGTTGCTTATTGGGAATAATTTTGTTGAACCCTGATGTTGGTAGTAAGTATCTAGACAGTTGCATAGCGGTTTTGTTTACAGAATAAGATATAGCCTCTCTGAACAGTTTGATTATTGCACCATGGTTTGCAATCGGTGCATGTCGACCAAGTTTCTCAAGACTGTGGAGAA
Gma.11165.1.S1_at	BQ079979	At2g02970	1e-39	Metabolism			AGCAGATCGTGGTTCTTGGTTTACATGTGTGGAGGCACTGTTGTGATTATGATGAAAATATTTNGCCTTTCGTGATGGCCACATCATACTTTCGAAGGTCATGCCAGCGGTGGGGCTCAGATTGTAAATCATTGGATTTTGGATGCAGTATATGGAGTTACTCTTGCTGAGGAACTAGTGTAGAATAGCAACGTTTCTGTGTTTAGTGGAAATCCAGGGATTGAGTGTTATGTATGCCTCTCGCTTTACTGATTACTGATAACAGTAAGGCAAGAAGTGGAGCAGGTCAGCCTAGGAATTATTCCCAGGGGGAACTAGATGCTGCATCCTTCAACAGAAAACACTTTATTATGTGGTTTTTGTACACTGCATAATAAATTATTGAGTTGATGTTTGCCT…
GmaAffx.92176.1.S1_s_at	CF807901	At5g16990	1e-97	Metabolism			GAAGGCCCTCCCAATAGTCGTGCTTACACTCCTGGCTCTCCATTAATAGGATATGGTGTGTCTAAAGTCCTGGAATCTGGGCACCCAGATTATAAGGAAGGTGATTTAGTGTGGGGCTTTACCAAATGGGAAGAGTATAGCTTGTTACCCTCAGCTCAAATACTCTTCAAAATTGAGCACACTGATGTTCCACTTACCTACTACACTGGAATTCTTGGTATGCCAGGAGTGACTGCATATGCAGGTCTATTTGAAGTAGGATCTCTTCANAAAGGAGAAAATGTTTTTGTTTCGGCTGCCTCTGGCGCAGTTGGTCAACTTGTTGGGCAATTTGCTAAACTGAATGGTTGTTATGTAGTTGGAAGTGCTGGATCTAAAGAGAAGGTGGATCTGCTGACA…
Gma.1195.1.S1_s_at	AI442801	At3g27890	2e-61	Metabolism			GAAATTTCGGAGCTTCCCATGTTGAACACTGATCTTGAGATCAATGGGACCTACCCACCAATAGTTGAAGCTTTTCGTCAAAAGATTCTTCAAGCTGATAGTATTCTCTTTGCTTCTCCTGAATATAATTACTCTGTCACAGCTCTACTAAAGAATGCAATTGATTGGGCCTCTAGGCCCCCAAATGTTTGGGCTGGCAAAGCTGCTTCAATTGTAAGTGCCGGTGGGGACTTTGGTGGGGGAAGGTCACACTATCATCTTCGCCAAATTGGAGTGTACATTGATCTTCGTTTCATCAATAAACCAGAATTCTTCCTTCTTGCATTCAAACCACCACCAAAATTCAATGATGATGGTGACTTAATTGATGAAGAGGCCAAGGATAAGTTGAAGCAAGTT…
GmaAffx.90444.1.S1_s_at	CF806169	At3g27890	1e-72	Metabolism			GAGCATCCTCGTCCGTGATTAAGGTGGCTGCACTTTCCGGATCTTTAAGGAAAGGCTCTTACAACAGAGCCCTCATTCGTTCTGCTATTGAGCTAAGCCAAGGTAGAGTTGAAGGCCTTCAAATCGAGTACGTTGATATTTCGCCTTTGCCCCTTCTCAACACCGATCTTGAGGTGAATGGGACCTACCCCCCACAAGTTGAAGCCTTTCGCCAGAAGATTCTCGCAGCTGATAGTATCCTCTTTGCTTCCCCTGAGTACAATTACTCTGTCGCAAGTCCTTTAAAGAATGCACTTGACTGGGCATCAAGGGCACCAAATGTTTGGGCTGGTAAACCTGCTGCCATAGTGAGTGCTGGACGAGGCTTTGGTGGTGGAAGATCACAATATCATCTACGCC…
GmaAffx.37206.1.S1_at	BM523216	At2g14170	1e-139	Metabolism			AGTTCTTCTTTTCATGGAGGCTGATAGCTTGGAAGAAGCCATAAACATTATCAACAGTAACAAGTACGGAAATGGTGCTTCTATATTTACTACATCNGGTGNTGCTGCAAGGAAATTTCAGACTGAGATAGAGGCTGGACAGGTTGGCATCAATGTCCCCATTCCAGTTCCTTTGCCCTTCTTCTCATTTACCGGCAACAAGGCATCGTTTGCCGGTGATCTCAACTTCTATGGCAAGGCAGGGGTTAACTTCTATACACAGATTAAGACAATAACACAACAATGGAAGGATTCAACTGGTGGTAGCAAGATTAACTTGGCAATGCCAACCTCTCAAAAATAATGTTGATAGCCAGAGCGTGTAATAAGGCTGTTTCTGAAGTCTTTGTTCTCTTGAAA…
Gma.17995.1.S1_at	BQ629324	At5g03860	8e-33	Metabolism			CGTGCATCACCCCAAGGAAGGAACCGTCAAAGCTTCGAACTAATTAAGGGGTTCATTATTGCCTAATGGTTGGATCACTTGGACTCTGTCTTGTGTACTTAAAGTTACTGTTGTGAGAAAATCACAAGTGCACGGTGGTTATCGTATTCACATGATTATGTGTATGACTTTGTGATTATCGTTATTCAAT
Gma.11039.1.S1_at	CD399802	At3g47520	1e-162	Metabolism			GTCTCTTCGCGCACTTGATGGAGATGGGGATGTGTATGAGTGCTCATTTGTGGAATCAAACTTGACTGACCTTCCATTCTTTGCTTCAAGGGTGAAACTTGGTAGGACAGGAGTTGAGGCTTTAATTCCATCTGACCTCCAAGGGTTGACTGACTATGAGCAGAAGGCTTTGGAAGCACTTAAGCCTGAACTCAAGGCCAGCATAGAGAAGGGGATTGCTTTTGCTCAGAAGCNAACTGTTGCTGCTTAAATTTCCTTGTCAGCAGGTGGTTTCTTGGGTTATGGATTTATTTGAGCATAAATACTACTTAGAGGACTTAGGTTGCAGATTTGTTGTAGCATCTTTACTGCTTCCAGAACTTAGGATTCAGACTTTCTATGTATCAATTCTACTTCCAG…
Gma.10759.1.S1_at	BE822425	At4g23850	1e-108	Metabolism			ATATTTACGGTCAAGTTTCTTCTATTGAATCTATATGGGTTTATGGAAACAGTTTTGAGGCCTTCCTTGTGGCTGTTGTTAACCCCAGTAAGCAAGCACTTGAACATTGGGCCCAAGAAAATGGTATATCCATGGACTTCAATTCTCTCTGTGAAGATGCTCGAGCAAAAAGTTACATAATTGAAGAGCTCTCAAAGATTGCGAAGGAAAAGAAGTTGAAAGGTTTTGAGTTTATAAAAGCAGTTCACCTTGACTCAATTCCATTTGACATGGAACGTGACCTTATCACTCCAACATACAAGAAGAAGAGGCCACAGTTGCTTAAATACTATCAGAATGCCATTGACAACATGTATAAGAGTGGAAGTAAACCCAGTGCCTGAGACCTGATTTGGGAGA…
Gma.12181.1.S1_s_at	BG041826	At5g18800	5e-23	Metabolism			GGCCTTCTGAAGGATCTGCACCAAAAGTGCACAAAGGAGATGGATGANTATGTTGGCTGCATGTACTACCATACAAATGAATTTGACTTGTGTCGCAAAGAGCAGCAAGCATTNGAGAAAAAGTGNTCTTTGGAATGAAATTATGCACTGCTGTTGTCGAAAATAATATCACAGGCAATTTGGAGTGAGCAAATGAGCCTGTTTTCCAAAAATTCATTG
Gma.7572.1.S1_at	BI970498	At1g78570	0	Metabolism			GGGATTACATTGATCCAAGCTTCAAGTGGACTAACTTCAATCTTGAAGAGCAAGCCAAGGTGATAATTGCTCCACGGAGCAACAATGAGATGGATGCATCCAAACTGAAGAACGAGTTCCCTGAGCTTCTTTCCATCAAGGAATCACTGATCAAGTATGTCTTTGAGCCAAACAAGAAAACTGCTTAAANNTATTNANGCGGTTTCATGTTTTAGANATCANAGATTATGCATTTTTGTNGCGGGCTACATAGATCACTCNTTATTTCATTGTTATTTNGTTGGGTTTTGATAAGAACCNTACTANAAAAGCTAGCCATGTAGTTCTTGTTCTCNTAGCTANAAGNGATTCCNGTTTCAGCATANTTCCATNATNTTACNGTGTTTAGAGGGTGACAAG…
GmaAffx.2833.1.S1_at	BQ610503	At3g23820	0	Metabolism			AGGAATATCACCTTGACAATGAATAATCACCTACGTACGTACCCAAGCCTTAATTATCCTCACACCACATGCCCTTGTTTTTGTTTTTACAAGAAACAAAGAAAAACAAATAATTCAAATACCTACCTTGGATCATTTTTCTTGTTTTTTCTTCAATTATTACTATTATTTTTTCTTAATTATTGTGGTGGTCCGTGTCCATGGATCCAAATGCATGTTGGTGTAGCAATTATACATAATATAAATATCGGGTATATATAGATGAGGGATATATATGCATATATAAATGTCAGGGAAACAAACAGAAAGCAAAAGCAGCAAGGAAGTGTATGTAATGTAATGTAATGTAGATCTGTAAGGAAAGAGAAAGAAAGGTGTAATAATGCAGGGTGGGGTCTG…
Gma.4549.1.S1_s_at	BI974530	At2g25110	6e-42	Metabolism			GCTTCCTCCGAAGGCGTCGAGGTGCAGGTTACTTACGGCACGGTTCTGAAGCTTATGCACGAGAAGACCAAATTTCGGTTGCATTCTCATGACGTGCCCTACGGTTCTGGCAG
Gma.7756.1.A1_at	BU549987	At1g16540	1e-43	Metabolism	Abscisic Acid Biosynthesis		AGTCAGTGCAAGTAGGTTTCGTCCCAATCTTGTGGTATCTGGAGGTAGGCCTTATGCTGAAGATGGATGGAGATACATTAGGATTGGAAACAAGTATTTCAGTTCGCTTGGGGGATGTAATCGATGCCAGATAATCAACCTTACAATAAATGCGGGACAAGTGCAAAAGTCAAATGAACCTTTGGCAACTTTAGCATCCTACAGGAGGGTAAAGCAGGGAAAAATTTTGTTTGGTATACTGCTGAAACATGTTTCTATTGACGGAGAGCAGCAAAAAGGTNATTTCTGGCTTCATGTGGGCCAAGATGTGCATCCGGATTAAAATATGCAATGTGTGTGTATAATCATACACAAATGCCTGCAAATTCATGTCCTCAATATAGTTCGTGACCTTGTAGT…
GmaAffx.18444.1.S1_at	BI469783	At4g11570	0.0001	Metabolism			CTTGCAGACATTGAAATGACTGAATTTGGGTCTGTGGAGCCTGAGATGGAGCTGGAGGTGGAAAAAGATTATGGCTCATCATCAGTTGATGACAATTTCTGGTAAATCCTATAATGTACAGTTGATTGAACCTCATCTGATTGTTGATGATATTAGTTACAGGTTAGTTACTTGTGTATATGGTAATCAGAATAAATGGGGTGATAAAATGATAAGTGGTATGCATTGAACATTGATGTTACTACTAATGCATTTTCT
Gma.5513.1.S1_x_at	AW310453	At5g02230	1e-111	Metabolism			TCAAGATAGCCAACCTTAATCCACANAGAACTTTGTTCTTTGAGGATAGTGTCCGCAACANACAAGCTGGAAAACGTGTGGGTCTTCACACTGTGCTGGTTGGAAAATCTCAGAGAATTAAAGGAGCAGATTATGCATTAGAAAGCATCCACAACCTTAGGGAGGCAGTGCCAGAACTATGGGAAGATGACATAAAATCAGAAGTTGCTTATCCTGGCAAGCTTGCTGTG
Gma.5606.1.S1_at	BI971017	At5g02230	5e-99	Metabolism			TTGTAATGGTTCAGGCACCTCTCAAATCTTTGACATNATAGGGCATTTTGCTCAGCNCAATCCCNGTGCAGTCNTGCCAAAGACACCAATTGTTTGCAAGCCATCAGAAAATGCCATTGAANTGGCCNTCAANATAGCCAANCTTAACCCACANAGAACTTTGTTCTTNGAGGACAGTACCCGCAACATACAAGCTGGAAAACGTGTGGGGCTTCACACTGTGCTGGTTGGTACATCACAAAGATGTAAAGGNGCAGATTATGCNTTGGAAAGCATTCACAACCTTAGGGAGGCTGTGCCTGAACTATGGGAGGCTGATATAAAATCAGAAGNTGCATACCCTGGAAAGCTAGCTGTGGAGACA
Gma.7892.1.A1_at	BU550899	At1g74210	1e-113	Metabolism			GATGATGTTACTGTTCCAACTCAAGACACTAATCAGTCATATTGGGAGATTACATCTGATGAATANNTAGAGTACATAAAGCAATATGTTGTGGGAATTGGACCTTGGAAGGACACAGTGGTACCTGTGGTAAAAAATTATATGNCAAATCCTACTAATCTTGTTGCCAGGGCACATGCTCATAACCTGCAGGTGCATCCATATACTTACCGAAATGAGTTCCCATTTTTGCATTTCAACTTCAGTCAAGATCCGTATATGGAATATGATTTCTGGATCAACAAGATAGGCGTTGATGGTCTCTTTACAGACTTCACTGGTAGTCTTCATCGTTATCAGGAATGGACCTCTAACCGTAAAGATGATGATGATGACAAGACTGAATCCAATCTATTACAT…
Gma.3133.1.S1_at	AJ272035.1	At5g27380	1e-147	Metabolism			GATGAGTTGAGGGAAACCCTCCTTAAANTTACAGGAAGCAGGTTCTGAAGAAGATGCAGNCATACATCCTTATGCAGAGGATATTTCCNGCCACTTCTCCAGCAATTTTGGTGCGTGATGGTAATTGGGATANGGGTCATGTCATTTCAGAAGCTGGANTATTTGGTACTTATTTAAGGAATAAGGANAAGNTTATCATTAATAACGAAAGTGGCTATATGGTGCGTACAAAAATATCATCATCTTATGAAGGNGGAGTTTTGCCTGGTTTTGGAGTGGTAGATACTGTATACCTAACTTGATGGAGCTAACCCCCCAAGTTATCAAAGCAATTCAAAACATTATGTATGGTTTATATATCACCACTCAAGTCTCCTCACTCCTGATTTTCTTTGTATG…
Gma.2075.1.S1_at	BI969313	At2g35120	1e-67	Metabolism			TGATGAAAATTCTGCAACCGTCGGCATAACTGATCATGCCCAAGATCATTTAGGTGATGTTGTATATGTTGAATTGCCAGAAGTGGGAGCAGCTGTAACACAAGGAGGTAGTTTTGGTGCAGTTGAAAGTGTGAAGGCAACTAGTGACATTAACTCTCCTGTTTCAGGAAAAGTTGTTGAAGTTAATGAAGCGCTTAACAGCTCTCCTGCTTTGATCAATTCAAGCCCTTATAAAGATGGATGGATAATTAAAGTTGAAATAAGTGACAATGGTGAACTAAACAACTTGATGGATTCAGATCAATACTCCAAATTCTGTGAAGAAGAAGATTCCAAGCACTGATGATCTTGGCAAGATCTTTCAGCACTCTTCAATCTCCATGGTGTAGATCATGTTTT…
Gma.9712.2.S1_at	CA936743	At1g22020	0.0001	Metabolism			AGTTGCAATCTGGTACAAGACAGTANGNAAGTAGGTACTTCCGTACTGCTGTTGAGGTTTNNTNTGGTGATCAAGTATCTTGTTCCTACCTTGGAGGCTGCACCATCCCAGCNGAATGCATCAAGTNAAGCCATTATAGGNGTTGGAACAGGGATTCTTGATCAACCAACCNGAGTACAGAATTCTTCTGGTGAATCTGCAGAAAATAATTACTCTGATAAANNGGTTAGNCACTTTGAATTCTTTTAGCTGATGTTTGATGCTGAAAGCTAT
GmaAffx.90562.1.S1_s_at	CF806287	At5g22740	1e-114	Metabolism			GTAAGGGCATAAACATAGTGTACCAAATCAGAGAAACAAGAGGAGGGTACAAAGCGGGTGCTCTAAAAGAAGGCCTAAAACGTAACTATGTGAAACACTGCGAGTACGTGGCAATTTTCGATGCAGATTTCAGGCCAGAGCCAGATTTTCTCAGACGTTCCATTCCTTTCTTGGTGGGCAACCCCGACATTGCTCTTGTTCAAGCTCGTTGGAGATTTGTGAATTCTGATGAGTGTTTATTGACAAGAATGCAAGAGATGTCCCTGGATTACCATTTCACAGTAGAGCAAGAAGTTGGATCAGCCACTCACGCTNTCTTCGGTTTCAACGGAACTGCTGGCATTTGGAGAATAGCTGCTATCAATGAAGCTGGAGGGTGGAAAGACAGAACCACAGTGG…
GmaAffx.43920.1.A1_at	BU761199	At1g60140	4e-08	Metabolism	Trehalose Biosynthesis		TTCAGGGCCTTGCTGCTTCATCCAATCCAAAACCCAGGCNTCTTGCTCATTCTCAAGTCTNTTTTGAGAGCACAGTTTGAGTTATAGANAAGTTAAGACAGCANTTATTGGTCNTCTCCTGTGAATCNATGAAATTTTTGGTTATTAATCTTAACCTGACAAACAAATGGNGCGGATCTAATTCTTTTTTGGGCTCCTGANCCGGTTTGCGTGGCATCNATCTNGGNGGNNTTTTGTTAAATANTGCGGTTCATTGNTGCCTNACAATTCTTCTCTTGTACATGGTAACATCANTTGTTATATTTGCTGGTGCCACCGAGAGCTTTAGTTGTGCTTAGAACTGTTAGATCNTTATCATCGCTGTTTGCACTGAACAATGGGGNCACCAAAACCTGTATA…
Gma.1917.1.S1_at	AF243365.1	At1g78380	4e-82	Metabolism			CTGATTATGTTGACATTAAGATACATGATCTTGGAAAGAAGATTTGGACATCAAAGGGAGAAGAAAAAGAAGCTGCCAAGAAGGAGTTCATAGAGGCCCTTAAATTGTTGGAGGAACAGCTGGGAGATAAGACTTATTTTGGAGGAGACAATATTGGTTTTGTGGATATAGCACTTGTTCCATTCTACACTTGGTTCAAAGTCTATGAGACTTTTGGCAGCCTCAACATTGAGAATGAGTGCCCCAGGTTTGTTGCTTGGGCCAAGAGGTGCCTACAGAAAGAGAGTGTTGCAAAGTCTCTTCCTGATCAGCACAAGGTCTATGAGTTCGTTGTGGAGATAAGAAAGAAGTTAGTCATCGAGTAGGTTTCATGTTGGATCTTAATAGCCATAGTGAAGT…
Gma.7287.1.S1_at	BE823827	At5g24400	1e-91	Metabolism			GTTAGGCCAATCTCAAAATTCTGTTAAGCTTCCTGTTGGATTGGTTTCACCTGAAGGGGAGTTGAAATGGTTCTTAGACAAAGGTGCAGCCTCAAAGCTGTAGATCTAGCAGCTAAGCCATGATCCTATATGTTGTGCCTGTGTATTTAACTGTTAACCTTTTTGCAATAATTAAGTGTGTATGAGAAGTAGAGACATCTAGTCCTGAATCTTCTTATCTCAGTGATAGTTTTGCGCTGAAGAGGGTCCTTTGTCATTTGTGACAATAAAGGGAATATGAAGGTAGTGTTTTGCTTCAACATTTCTAATTTCTTCCCCCCAGATTTCCAATTAATGTGCACCAACCCCA
Gma.6394.1.S1_at	AY323131.1	At5g17330	0	Metabolism	Amino Acid Biosynthesis/Metabolism		GACGAATTCCAAATCTCAGACTTTTTAAGGCGCTTTGGGTGGATAGTGCCAGCATACACCATGCCCCCAGATGCTNAACANTGTCACAGTGCTTCGTGTTGTCATCAGGGAGGACTTCTCAAGGACCCTCGCGGAGCGTCTCGTGTCCGATGTGGAGAAGGTGCTGCATGAGCTTGATTCACTTCCTGCAAGGGTCATCAGCAGCACCACTGTGACACTCAGTGCAGAAGAAAATGGCAAGGTAGTGGTTGCTAAGAAGAATCCTATGGAGACTCAGAGGGAAATCACTGCCATTTGGAAGAAGTTTGTGTTGGAGAGGAAGAAGAACAATGACAAGATGAATGGTGTTTGTTAGTGTTAGCTTCAAGGGGGTGTTGTGCCTATGCCTCTGCCTTATTG…
Gma.1419.1.S1_at	BG155556	At5g18170	0	Metabolism	Amino Acid Biosynthesis/Metabolism		GAGGCGTTACAGTTAGCTACTTTGAGTGGGTTCAGAACATCCAAGGTTTCATGTGGGATGAGGAGAAAGTGAACAATGAGCTAAAGACCTACATGACCAAAGGTTTCAAAGATGTGAAGGAAATGTGCAAAACCCATGAATGTGATCTTCGTATGGGAGCCTTCACCCTGGCAGTTAACCGTGTCGCACGTGCTACTGTCCTTAGGGGCTGGGAAGCTTGACATCCATTGCTTCTGCTTTCAATAAATTAATTAAAGAGCTCCCACTCTCAGCAACACTTCACAAAGTTTTTGTTGCTTTCAACTAATGTGTTGGGTGAATCGTATTTTCACGCCAAATTTTCTTTNAATAAATTAGTATAGTATATAAATCTTTTTGTAACTACATGTGTGGTTCTAT…
Gma.4333.1.S1_at	BI967236	At5g53460	5e-63	Metabolism			AATGTTGCCGGGAGTCCAGACGAACTTATCAAGAAGAAGCAGCAACCAAGGGACACTGTGGCAGTGGCAAACAAACAGTGATTACTTAGGAGCCTTCTGTGGTTTTTCTATTCTTAAAAGATGGAATAATAAAAGATGACTGCTGGAGATTCATTGAGCATTGTTGGTTCGTAGTTGGTGCCCCATATAAATGTAAGGGGGAAAATAATAAAGAAGCGATCTAAGGGTGCAAGGTTAGTGCACAGTAGAAAATTAGGAATGTTCATAGGCTTCGTGATGGAAAGGT
GmaAffx.90206.1.S1_s_at	CF805853	At1g28480	1e-29	Metabolism			CATCCCCATAGGAGCACGTGGCATGCCACACGCAGGAGGAATCAAAGAATCCAATGGCACCTATCCATCCAAAGCTGCCACAATGGTATCGGAGAACGCGGTGGTAATCATTGGAAAACGGGGATGCTGCATGTGCCACGTGGTAAAAAGGTTGTTACAAGGTCTGGGAGTGAACCCTCCCGTGTACGAGGTGGACGAGGACCACGAAGCCGCCGTTGCTCTCCACCTGTCCCCGCAGGGCGCCGAAACGGTGCAGTTTCCGGCGGTGTTCCTGGCCGGCAAGTTGTTCGGAGGGTTGGAAAGAGTTATGGCCACTCATATCTCAGGTGAATTGGTTCCCATCTTGAAGGATGCTGGTGCCTTGTGGCTCTGACTCTTACTCTAGCTACCTCCATCTTT…
Gma.15564.1.S1_at	AF293970.1	At2g22240	0	Metabolism			TATTAAGTATGTGCCTTACGTAGGGGANAGCAAGAGAGCCATGGATGAGTACACTTCAGAGATATTCATGGGTGGAAAGANCACCATTGTTTTGCACAACACATGTGAGGATTCCCTTTTAGCTGCTCCTATTATCTTGGACTTGGTCCTTCTTGCTGAGCTNAGCACTAGAATCNAGTTTAAAGCTGAAAATGAGGGAAAATTCCACTCATTCCACCCAGTTGCTACCATNCTCAGCTANCTNACCAAGGCTCCTCTGGTTCCACCGGGTACACCAGTGGTGAATGCATTGTCAAAGCAGCGTGCAATGCTGGAAAACATAATGAGGGCTTGTGTTGGATTGGCCCCAGAGAATAACATGATT
GmaAffx.93244.1.A1_s_at	CF808969	At5g18640	1e-23	Metabolism	Lipid Biosynthesis/Metabolism		CCACTTCCCAAGAGAGGTTTGGCTTTATAACATCGGATTAGGTAGTCTTGTGTACAACGTTGAGAAGATTTGTGATGAATCTGGTGAGGATCCGGATTGCAGCAGGTCGGTGACTGGGAATAGCATTGCTGATCACTTAGTCTATTATGGCGTAGACATGGGATCAGATGAGCCTAGTTCATGCAGAATTGTTATGGATTCTCATGTTCAGAATACTAGCATCAGAGATTCAAGAGGAAACTTAATATTGTCCAGAGATCCTGCAACCCCCCTCATCAAATTGGGTGGAGAGGGTGACAATCAGGAAAATCCCATTAATGTTGATTGAATTGGCATTAGATATCTCTTGCATGATATGTTCCAGAGGTTTGCTGTGG
GmaAffx.30024.1.S1_at	AW164766	At5g14180	2e-12	Metabolism	Lipid Biosynthesis/Metabolism		GAGAACAAGCGCAGCGTTCAGTTCATCCAGGAATATGCTCATGCTGACTACATTATGGGGTTCAATGCCAAGGACTTGGTGTATAATGCTGTTCTTTCATTTTTCAATCATCAAGTTTAACACTGGATAGAATGAATCAAGTTGTATGAAAAGAGTNCCTTCATGTATTAGGTAGCTATCATTGAGATCAATC
GmaAffx.11224.1.A1_at	CD416193	At5g08415	2e-19	Metabolism			ATCTATTGGTTTTCGTTACGTAGCTAGTGGTCCACTGGTGAGATCTTCGTACAGGGCTGGGGAGCTGTTTGTCAAGACAATGGTACGGGAAAAGACCAAGAATGTTGCTGACTCGTTGTTATGATCTTTAGGTTCTGCGATTATGTATATTAGGCAACAACAACTGACGAGGTTTTGGCATGTTCATTGCTGAGGAGAAAATGTGTGCGGGCAGAAAATTCAATACTTTTGAAGTCAATCAGCTTTACGTATTCTTTGAACCAG
Gma.10969.1.S1_a_at	U36191.1	At1g55020	0	Metabolism			TTCTGATGCTGGTCCACTAGAGGCCTTCAAGAGGTTT
Gma.11166.1.S1_x_at	AW705829	At1g55020	1e-156	Metabolism			AATCCAAATTGGACTGATGACACAAAGGCAATTCAAGCCTTTAAGAAGTTTGGAAACAAGCTGAAGGAAATTGAGGACAAAATCTCAGGGAGGAACAAGAATTCAAGCCTTAGGAACCGTAATGGACCGGCGCAGATGCCCTACACTGTGCTTCTTCCTACCAGTGGGGAAGGCCTTACTTTCAGAGGAATTCCCAACAGCATCTCTATCTAATGAGAGTGTGTGGTGTGTGGTGTGTGGTTTTCTTTCCTTCCAACGTACCTCTCATTGACAAATAAACGTGCAAACTTATGTGTGCATAATTTTCTTATGTATGCTTAAGTTTTGTAATTGGATGCTATCTAGTTTTTCATATCTAATAGGGTGTTGTGTCAGTTTTTAT
Gma.10969.3.S1_x_at	CD396552	At3g22400	1e-119	Metabolism			ATTGGACTTCTGATGCTGGTCCACTAGAGGCCTTCAAGAGGTTTGGAAAGAAGCTTCAAGAGATTGAACAAAAGCTTATACAGAAGAACAAGGACGAGACGTTGAGAAACCGCAGTGGGCCGGCTAAAATGCCTTACACTTTGCTCTATCCTTCTAGTGAGGAGGGATTGACTTTCAGAGGAATTCCCAACAGTATCTCCATCTAGGGGCTCTATGGTTGTTGCAGTACTTTCCCTGGTTTTCAATAAAAGTGAATAGAAGGAATATGATTCCTTCATCTACCTATGTATGGTTAAGTTATGTATTTGGGGTGATTGAATGTTCTCGTGTTTGCTGTTAAGTGTTAATGAAGAAATTCTGTTTGTATAAATTGCTGTTAAGTGTTCTCGCGCATGTTTC…
Gma.16423.1.S1_at	BG507821	At3g45300	0	Metabolism	Amino Acid Biosynthesis/Metabolism		CTTATGTGTATTCAGTAGCTCGGGANTGTGACAACGGAAAAGTTGACCCAAAGGATTGTGCTGGAGCTATACTTTGTGCAGCTGAAAGAGCAACCCAGGTTGCTTTGCAGGCAATACAATGTTTAGGTGGGAATGGTTATGTGAATGAGTATCCTACTGGTCGTCTCTTGAGAGATGCCAAACTCTACGAGATTGGTGCAGGAACTAGTGAGATCAGAAGAATGATTATTGGACGTGAACTCTTCAAGGAGCAATAACATGCCACCATACCTTATATGTGGATGGTGTTGAGCCCCTTGGGAAATTCCCTTGCAGATGTTTGTTAAACTAATGCTACATTCATCAAACGAGAATTGATCATTGGTCCAAGGAATAAANTTCTGCCATATTACATTTTTA…
GmaAffx.77005.1.S1_at	AW509412	At3g58610	1e-89	Metabolism	Amino Acid Biosynthesis/Metabolism		CTCGATTTCGACACGAAGGTTTTCAAGAAGGAGAAGATTAACCTCGCNGGACACGANGAGTACATCGTAAAAGGAGGCAGGGATTTGTTTCACTTGTTGCCCGATGCTTTCAAGGGNATCAAGCAGATTGGTGTTATCGGTTGGGGATCTCAGGGACCTGCNCAGGCTCAGAATCTACGGGACTCNCTTGCTGAAGCAAAGTCTGATATTGTGGNCAAGATTGGACTCAGGAANGGTTCTCGTTCCTTTGCNGAAGCTCGNGCAGCTGGGTTTTCTGAGGAGAATGGGACTCTANGTGACATATGGGAAACTGTCTCGGGCAGTGATCTTGTGATGCTGTTAATTTCTGATTCCGCGCAGGCTGATAACTATGAGAAGATATTGTCTCACATGAAGCCA…
Gma.2971.1.S1_s_at	CD409358	At4g22220	1e-62	Metabolism	Nitrogen Metabolism		GCAAATGGAGGAAGTTCTGACTATAAAAAATACTGAAATTGCAAAGCATCTTTCACTTCCACCAGTTAAGCTCCACTGCAGCATGCTTGCTGAAGATGCNATCAAAGCNGCCGTTAAAGACTATGAAGCTAAGCGTGCTAAGGCAACTGCTAGCGGAGAGGCAGCAACAGNAGAGAAGCCTGCCANTGCATGATTTCTTTCATNTATANAAAGAATGATGANNNAAACAACCNTTTGTTTGTTTGTNNNTTATTCTNNTAATCAGTTNCTNATNGAAGANCACCTTCACTNGANNNTNNGTTGGACTTAGTTATAGCTAGAGAGTATTCACATCATGCGAAGTAAATATTTGAAATGCCGGCTATGGTTTGTTATCTGCTACTGGGTTTGTAT
GmaAffx.92014.1.S1_at	CF807739	At2g18230	8e-73	Metabolism			TGAATAGCCAATTTCAGTGATCTCCAATTATGTAA
Gma.10976.1.S1_at	AI856391	At3g53620	3e-99	Metabolism			AGTAAACGACTTTTTGCCTGCCTCAGCTGCTTTNGAAGCGGTTAATAGATCCATGAGCTTGTATGCGGACTACATAGTGGAGAGCTTGAGACGGTAGTCGTTGATGAATGATGCACGTCAAGGATTTTTAACTGACGGACCAATGGAAGATGTTTGCTTGAAAAAAGGCTGCATTATCAATATTATGTAGGAATAAAAAAAAACATTTTACTTTAGCTGCCTCTTAGCTCATGCATGTTCTACAAACTNNNNGTGCTTAATTTCAAATATGTCATCCCTGCAATATCAAATNTACCTGCCTCTTATAGCACATGCACAATCCAATATCAAATGTTTTAATCNNTGTATAATTTTATATTCTCACCCTTTCTATTAG
Gma.13938.2.A1_at	CD410984	At4g26900	7e-13	Metabolism	Amino Acid Biosynthesis/Metabolism		TTTTCACAGGAAAGAGGTGCCTATTCAGTCGGTAAAAGAGCATTTGTTGAAGGAAGGCATAGAAGTTCGAATATGATCATATGCATTTAGTGGTAAAATTTTTGAGATGCACTTCACNATAATCAAACCTTGTACGTTATCACTTTTTGTGTAATCTAACGAAGCTCTCAAAATGTCAACATTTTGGATATCATGAAAAGATTTTCACAACGAGACCTTTCCTTTGTTATCTTTTTAAGGAAATTATATTTACCATGTGCAGCACTATCTCTGAACATTTG
GmaAffx.92275.1.A1_s_at	CF808000	At5g11650	7e-63	Metabolism			GCTCCAATTTTTTCTCTGGTAGCTCCAAGATTCCAATTCAAAGGAGCAAACAAAAGGGGCATTCCAGTTTCGAGGGATCCAGCAGCTTTGTTGGCAAAGTACTCTGATCCTTTGGTCTACACAGGACCTATAAGGGTCCGAACTGGCCATGAAATATTGCGGATATCCTCGTACTTGATGCGAAACTTCAACTCTGTGACTGTGCCATTCTTTGTCCTCCATGGAACTGCTGATAAGGTGACTGATCCACTGGCCTCACAAGATCTATATGATAAGGCAGCTTCAAAGTTCAAAGACATAAAGCTTTACGATGGCTTCTTGCACGACCTTCTGTTTGAGCCTGAGCGTGAAGAGATAGCTCAGGACATTATCAACTGG
Gma.6593.2.S1_at	CF923087	At1g53580	5e-41	Metabolism			GATTTTAACACTGCCCAAGAGTACGTTAATCTATCCAGCTCATGACTACAAAGGATTCACTGTGAGCACTGTTGGAGAGGAGCTGCAAAACAATCCACGCATAACAAAGGATGAGGAAACTTTCAAGAACATCATGGGAAATCTTAACCTGTCATATCCTAAAATGATTGACATAGCTGTCCCAGCTAATATGGTTTGCGGAATCCAATCCAATCCAAAGCAAGCTGAGGCTTCATAAGCCTTATCTGAGAGTCACACACTGATGTTATTTGACACAAAGACCTTGCAAGCAAAAGGGGGAAAAATTGTTATAGCCCTTTGAATTGAAGAGAAAAATGGAAATTGTAAATAAATAAAATGGTATTTGTGTTGTGGCCCAAT
Gma.7652.1.S1_at	AW351228	At2g19860	1e-34	Metabolism			TAATGTCAAGGTAAATCAGTGTAACACTAGTTTCATTTTTTTGTATACCTACTAGATCAACAGATTGAAGCAGAAAAGTCTTCGTTACTAGTCCTAGAGAGCTT
Gma.2451.1.S1_at	AW100972	At1g78680	1e-122	Metabolism			GTTTATGTTTCCACTGTACGTTCTCNAAACTATCCTGTGACTGGCTTCCAATGGCATCCAGAGAAAAATGCCTTTGAATGGGGTTCACCAAGAATTCCACACACGGAGGATGCCATTCAGATAACCCAGTATGTTGCAAATTTTTTGGTCAGTGAAGCTAGGAAATCCTTAAACAGACCAGTTGCTCAAGAGTTGCTAGACAATCTCATTTACAATTACAGTCCAACTTATTGNGGGAAGGCTGGGAAAGGATATGATGAAGTTTATATATTTGCGCAAGCCTGAGAATGCTGGAGAAATCAGCCAAGAATTGTATTGTGCATAGTAATTACCATGAATGTTGTTGTATGCACTAGTAATATCATTGTTATGATGCACAATAATGAGAGCAAGATGCTT…
Gma.1314.1.S1_at	U63726.1	At1g78660	1e-101	Metabolism			GTCCTGCACAATCATCGTTATGCCATATCCCCACGCAAGCTTCAATATAATACCAAGTTATCTGACTTTTTTGAGATTCTGGCAACATCTGAGGATAGAGATGGAAAGACTTTCGTTTCCACAGCACGTGGTAGGAAATATCCCGTGACTGTCAACCTATGGCAACCAGAGAAAAATGCTTTTGAATGGGCTACATCTTTGAAAGCCCCTCACACAGAGGATGCAATTCGGGTTACTCAGTCCACAGCAAACTTTTTCATAAGTGAAGCTAGGAAATCCACAAACACACCTGATGCTCAAAAAGTGCGAGATAATCTCATCTACAATTACAAACCTACTTTTGGTGGAACGGCTGGGAAAGGATATGATCAAGTGTATCTCTTTGAATAATTCTATCTG…
Gma.5637.1.S1_at	AY126715.1	At2g47180	1e-148	Metabolism	Carbohydrate Biosynthesis/Metabolism		TGCTGAACAGGATTTTTTGAACATGTACTTCAAGGACAAATATAGGCCAATTCCTAATGTCTANAATCTTGTGNTGGCCATGCTGTGGCGTCACCCTGAGAACGTTGAGCTTGANAAAGTTAAAGTGGTTCACTACTGTGCTGCTGGNTCTAAGCCTTGGAGGTACACNGGGAAGGAGGANAATATGGAGAGAGAAGATATCAAGATGTTNGTGAAAAAGTGGTGGGATATATATGAGGATGAGACTTTGGACTACAACAATCCACTCAATGTGGATAAGTTCACTGCGGCACTTATGGAGGTTGGTGAAGTCAAGTTCGTCCGTGCCCCATCTGCTGCTTAAGAGTGTCTTTGGAAATCAAGTGTGATCCAAGTACATGTACAAAGTCATACATCATT…
Gma.11261.2.S1_s_at	AW318293	At3g06580	0	Metabolism			TTTGTCGTAACAATGGTGCTCTTGGGGCAAGGCTTACTGGAGCTGGATGGGGTGGTTGTGCTGTTGCTTTGGTGAAAGAGAGCATAGTTCCACAATTTATCCTTAATTTGAAGGAATGTTTCTACCAGTCTAGAATAGACAAGGGCGTTATTAAGAAGAACGATCTTGGCCTTTATGTATTTGCTTCCAAGCCATCAAGTGGTGCTGCTATCTTCAAGTTTTAGTGTTCTTTAACCCGCTTCCCTTCTTATGGCTGCGACTTTCTTCCCCTGAGATCTAGACACAGATTAGATGCAATTTCTGATGGAGTAAGATTAAATGGTACCATATTTTCTTTGTTAAATTATTTTAGTTGATACGATGAAAGCAAATAATGATAATATTGCCGAACGGCTTTTA…
GmaAffx.43676.1.S1_at	AW234124	At5g50950	1e-19	Metabolism			GGACCGTCTGATTGACTAACTCGCAATGTTTTGTTCTAATAATTCCTTGTTTCATCATATCGGCTACATTTGAGGTAGTATTTTTTTAGCTACACCCGTTGATTGGTTTGAGAAATGGCAACCCAATGAACAATAATTTGGCTTCCTCAGTTGATATTCGCGAGGGAAGAGTTCTTCCAAATTTGTAACGAGA
Gma.6289.3.S1_a_at	AI437818	At1g12050	1e-31	Metabolism			GGTGTGGTGTCACGGACTAATCTAAAGCACTTATATTGGACATTGACCCAACAACTTGCTCACCATACAATCAACGGTTGCAACCTTAGGCCAGGCGATCTCCTTGGAACTGGGACAGTTAGTGGTCCTGAGCCAGAGTCCCGTGCATGCTTGCTAGAATTAACAT
GmaAffx.42255.1.S1_s_at	BQ612697	At1g12050	3e-30	Metabolism			GGCCGCAGACTCCTGTTCTAGATAACTGGTATCGCCTGCCTGTTGCCTACCATGGACGGGCATCTTCTGTTGTTATTTCCGGAACAGATATTGTCCGGCCAAGAGGTCAAGCTCATCCAGTTGGCAGCTCTACCCCCTACTTTGGCCCTTCATTAAAGCTAGACTTT
Gma.10227.1.A1_at	BE020065	At5g61290	2e-30	Metabolism			GATGGAATCCATCGAGGAGTTCTATCATTCAAATGAAGTAGCTGGCATTCCTAAACGCTACACCCATGTGGTTGATGCCTTTGATTATTGTGACAAATACGGAGAAAATGTTGGATTCCCAAAGACAGAAGAATGGAGGAAAGAGTTGTGCATATCAGCTGGAATGAACGCTTTTGCCAACTTGGAGACATATCGTGATTCGTGGAATGATGATATTGATGAGAAGCTTCAGGAGGCCCTTCGAAGTCCTTACTTCACTCAACTTGAACAACTTTCTCTGTAAAACTCGA
GmaAffx.74155.1.S1_at	AW396307	At2g39770	2e-56	Metabolism	Colanic Acid Biosynthesis		GTCATTGTGCATGAAACTGCCACTATTGGTGAGGGATGTCTCATTGGACCTGATGTTGCCATTGGTCCTGGCTGTGTTGTTGACTCAGGTGTCAGGCTTTCACGCTGCACAGTTATGCGAGGAGTTCGGATTAAAAAGCATACTTGCATATCCAACAGTATCATTGGGTGNNATTCCACTGTTGGGCAATGGGCCCGTGTGGAGAATATGACTATCCTTGGAGAAGATGTTCATGTTTGTGATGAAGTTTACAGCAATGGTGGCGTAGTTTTGCCTCACAAGGAGATCAAGTCAAACATTCTGAAGCCAGAGATAGTCATGTGAGGCTACTGTCTTAAATTCATAGCATGTGATTAGGAAGTTGTAAGTTTTTGTGTCTGAAATGTTTGTTTGTTTCTT…
Gma.2319.1.S1_at	AW349967	At4g34510	4e-16	Metabolism			AACAGTGCGGTTTGGCAGGCTCTGAGNAATGTGAGGCCTTCTCCTAATGGACCATGGGAAGATTGCATTCATAAGTATCCTGTGGAAATAGTCACATAGTGATCATAGTTCAGTTCAGTTCTCAGTCACATACTCTGGCTGCTACAACTTAATTCAGGGTACCCTTCATTAGTTTCCAGATCCATTGTCTCTCTCTCTGTTGTAGATTTCATTGTGTAATTCACTGCCTCTTTTGTGTTTGATGATTGTGGATTTTCATTGGGTTAAATTCATGTATCTGGAGTAATATGATANGGGGAATTCCTGAATTTTTTTTCTTCCTGCTGATGCACTTATGAATTTTTATTTTTTTAGTCATAAAGTTGCGCCTGGGTAACGAGGCGCTTATAGGCCCCGATG…
Gma.15037.1.S1_at	BE347885	At5g27320	2e-06	Metabolism			TGCTCCCGCTATTAGGTACTTACATGCTACTAAATGTGTCGTGAGATTTGGTGTAATCAGCATATAGCTGTGTGATGTTTTTCCTGAGCACATAATGAGGAAATTGGGTGCTGCGGATAGGTGANAGCTTTTTAGGACAAAGGGAGCTCAGGTCATGTTTATGGGAACCACCAAAGTTGTGATTACCCACTCTGACTTCTAGCCAAAAAGGAGAGGAAGGCCTTATTCTATTTCTGGGCGTGACCTTGATGCCAATCAGGTGGGGCTTGTCGTTGTCTGGCTAGTGTTATATATATATATATATATATAACTAATTTTGGAACTAGGATAGGAAAATATCAATGATATGTTGGTGCTGTTAGGTTATATACGTCTGTGCTATCTTCATATGAGTGTTTT…
GmaAffx.37736.1.S1_at	AW832101	At1g36050	8e-52	Metabolism	Fatty Acid Biosynthesis		GCATTTCAAGAGTTCAGAGCTGGGTGTTGCAGTTCCTGGAGTTTTCTTCTTTTATGACATATCTCCAATCAAGGTCAACTTTAAAGAGGAACATANTCCATTTTTACATTTCCTGACCAATATTTGTGCAATTATTGGAGGTGTATTTACTGTTGCGGGAATAATAGATTCATCGATATATTATGGTCAGAGAACAATCAAGAGGAAGATGGAGCTTGGAAAATTTACATGATGTGGTCAAATTCNGCATGAGTGCTCTAATATCCTAATTGATTTGACGTATTTGGTTGGCTGGTGCATTGAGTATNGTNNNNAATNTGGNNNNNNANGCNNANAATNCNANNGGTAAGCAGAGCCGTAGNTTCNGTTGATGCATGAAGTGTATTTTTTGGATCATGA…
Gma.10749.1.S1_at	AW349258	At3g27570	3e-35	Metabolism			GAAAAACAATCACGTTGAAAGCGACAATCTGAGCAGCAAAGAAAACGTGGGTGGTTGTTGCCAGGGTGTTAATGGAGTTTCTTGTTGCAGAAGTGCAAGTCTTGAGCAAAACAAGGAGATTGAAGAAACACCTGAAACACATAAGAAGGGGAGCNAAATCTGTTCGAATTGGCCTCAACTGCAGCAGCGTGATATTCGCACAGCTGTTGGTGTGCTTGGAGCTGTAGCAGTTGTTGTTGTGGCTTACAAACTNTACAGAAGGGCAGCGTAGGTTACTCTCTAAACCATGTTTTTTAGGTTGCTTGGAAGTTTATTACCCAATATTTTTTTTTGTCGAGGTTCAATAAATTTAAGAAACAATCACGAAAACTACTATTACCAAGTCATACATAGACACTT…
GmaAffx.43343.3.S1_s_at	AI496624	At3g48700	3e-16	Metabolism			CCTGCTGCCTACGAAGACGGTTGGACCACCCTCAAATGGATTGCTTCCCACGCCAACAACACCAACACCACCAACCCGGAGCCATGGCTACTCAACCACGCCGACTTCACCAAAGTCTACGTAGGAGGTGAAACCAGCGGTGCTAACAT
GmaAffx.81366.1.S1_at	BU550660	At3g63010	1e-116	Metabolism			TAAAGCTTGACATTTTACTTGGGTTNTCTTTTTTTTTNCNNNNNNNCCCNCACTTTTGTATCNNNNNNNTTNTCTTTTNCTNNNTTGTAGTAAGGTGTGTAGTTATAAGATTGTGTAGCATTACTTGTTATTGTCATAACATCTATGGTGGNCAATTTGAGAGTTCTGTGACCTGNGGACTACTGCTTCNTGTTCNTCTCTGTTTGTGTCTNTTGGAAGGTAGCNCCTANCACCNGCTTNGGCAGTACCAGAACTCGGTTCATTTGGGGGGTTTGGTCGAACCACCGTATACAACGCTTCAGCCCCCCTTTTAACGTTTTGAGGTCAATGGCAGGAGGGGAGATAGAAGATGAGGATTGGTTCATCACTTTGTTTGATTAAGTGAATGGTTTCCTCTTG…
GmaAffx.92897.1.S1_s_at	CF808622	At3g23490	8e-58	Metabolism			TCACCAACGTCTATGTTGCTCAGCTTCTCAGGAGACAGGCTCAGCTCAATCCCCAAACTGCCCCTCTACTTCGGGCAGCGCTGCCCGACCTGCCCCAAGACCTTGTTTCTGAGATGATGAGACCCCCTTTGAGGTCTTATGACCCTAATCTCATCCAAGACCCCACTGTCTATAGGTTGAATGAAGCTGTTATGCATTTTGGGGAGAGCATCAAAGAAATAATCAATGAGGAGTTTGGTGATGGGATCATGTCAGCAATAGATTTCTACTGCTCGGTTGATAAAATTAAAGGAGTAGATGGGAAGGATCGTGTGGTATTGACATTTGATGGGAAATATTTGCCACATTCAGAACAGAAATCTGAGCACATGGTTTCAAGAACAAGGCCACTGGGAAAAC…
Gma.5578.3.S1_a_at	AW310572	At2g40890	9e-24	Metabolism	Cytochrome P450	CYP98A	GTTGGACCCCACCTGAAGGAATGAAGCCTGAGGAAATTGACATGGGAGAGAATCCAGGGTTAGTCACATACATGAGGACTCCAATACAAGCT
GmaAffx.41059.1.S1_at	BI315893	At2g02580	3e-31	Metabolism	Cytochrome P450	CYP71B	GAGGTTTGTCCCAGAAAGGTTCGAGGATAGTTCTATTGATTTCAAAGGGAATAACTTTGAGTACCTACCATTTGGGGCAGGAAGAAGAATATGTCCAGGCATCTCATTTGGTTTAGCAAGTATTATGCTTCCATTGGCTCAATTACTTTTGTATTTCAACTGGGAGCTCCCAAATGGGATGAAACCTGAGAGTATAGATATGACTGAACGCTTCGGATTGGCTATTGGGAGGAAAAATGATTTGTGTTTGATTCCCTTTATTTATGATCCTTGAGTGCATGATTGAGGAGTTCATGTTTATCAACCCCACTTTCAAATGTCCATGTT
Gma.4374.1.S1_a_at	BM178538	At2g45550	1e-53	Metabolism	Cytochrome P450	CYP76C	CATGACTATGAGCTATTGCCATTTGGTGCTGGGAGA
Gma.4374.1.S1_s_at	BM178538	At2g45550	1e-53	Metabolism	Cytochrome P450	CYP76C	GGCCAATTTGTTGCATGGATTTAACTGGAGATTGCCTGATAATGTGAGGAAGGAGGATTTGAATATGGATGAGATTTTTGGGCTCTCTACACCTAAGAAACTACCACTGGAAACTGTTGTGGAGCCNTAGGCTTCCATACCATCTTTATTCTCTCTGAGCAGTGCCTTTGCACAAAGCGTTTCTCTCTAATAAGATTGTTGTAGGGATAATGGGTCTTGAGTGAGCTTATGTTTGTCACACTGGATTGCAAT
Gma.4374.1.S1_x_at	BM178538	At2g45550	1e-53	Metabolism	Cytochrome P450	CYP76C	CATGACTATGAGCTATTGCCATTTGGTGCTGGGAGAAGGATGTGCCCTGGGTACCCTCTTGGCCTTAAGGTCATTCAAGCAAGTTTGGCCAATTTGTTGCATGGATTTAACTGGAGATTGCCTGATAATGTGAGGAAGGAGGATTTGAATATGGATGAGATTTTTGGGCTCTCTACACCTAAGAAACTACCACTGGAAACTGTTGTGGAGCCNTAGGCTTCCATACCATCTTTATTCTCTCTGAGCAGTGCCTTTGCACAAAGCGTTTCTCTCTAATAAGATTGTTGTAGGGATAATGGGTCTTGAGTGAGCTTATGTTTGTCACACTGGATTGCAATAAATTTTTCTCTCTTTTCATAACAATGTTAGAAAGAGAGAAAAAAAAAANGATGTTGTGGT…
Gma.4628.1.S1_at	BG156501	At2g45580	1e-101	Metabolism	Cytochrome P450	CYP76C	AAGCTCACGCCGTTCGGGAGCGGAAGACGAATTTGCCCTGGCTCCCCCCTCGCCGTTAGGATGCTGCACAACATGCTCGGTTCCTTGATCAACAACTTTGACTGGAAGCTTGAGAACAACATTGACCCCATCGACATGGACTTGGATCAGTCCCTCAGGGCTATCCCTGTTCTCGTAAATGCCAACTAATTCAACATCATCTGTATGTTGGCATGCCATCCCATGTACCTTTTTCTCAGAAACAGCAAACAGAAGCTTGATTCTTTGGTTTGAATGTTTCTCGTATGTGCTAGCTTTGATCCAGCTTGTTTCTTCCAGCCTGGGTTTAGGATAAATAAATAACCAGGCTTTGAGTAACATGATG
Gma.6727.1.S1_at	Y10493.1	At3g26300	1e-103	Metabolism	Cytochrome P450	CYP71B	AGATCCCCAGTATTGGAGTGATGCAGATAGGTTTATCCCAGAGAGATTCAATGACAGTTCTATCGATTTCAAAGGAAATAGCTTTGAGTATATACCTTTTGGGGCAGGAAGGAGAATGTGTCCAGGCATGACATTTGGATTGGCTAGCATTACGCTTCCATTAGCTTTATTACTCTATCATTTTAATTGGGAACTCCCAAATAAGATGAAACCTGAGGATTTGGATATGGATGAACACTTCGGAATGACAGTTGCAAGAAAAAACAAGTTGTTTTTGATTCCCACTGTTTATGAAGCTTCATGATACACGTATTTT
GmaAffx.93571.1.S1_at	CF809296	At3g61040	6e-18	Metabolism	Cytochrome P450		TGACTGCCACGTCACGCCCTCTACCATGGACATGAGG
GmaAffx.90945.1.S1_at	CF806670	At4g37360	3e-44	Metabolism	Cytochrome P450	CYP81D	CGACTCCTCTTCCTATAATCGGCAACCTTAACCTCGTTGAACAACCTATACACCGTTTCTTCCTCCGCATGTCCCAAAAATATGGAAACATCATATCCCTTTGGTTTGGGTCACGTCTTGTTGTGGTTGTTTCATCACCCACAGCGTACCAAGAATGTTTCACTAAACATGATGTTACCTTGGCCAACAGGGTACGCTCCCTCTCGGGAAAATACATATTCTACGACAACACCACCGTAGGGTCTTGCTCCCACGGCGAGCACTGGCGCAACCTCCGCCGCATAACCTCTCTCGACGTTCTATCGACGCAGCGC
Gma.157.1.S1_at	D86351.1	At5g06900	1e-115	Metabolism	Cytochrome P450	CYP93D	AATTCCAGCCAAGACCCGATTATTTGTCAATGTTTGGGCTATTGGAAGGGACCCCAATCATTGGGAGAACCCATTTGAGTTTAGGCCGGAGAGGTTTTTTGAAAATGGACAAAGTCAATTGGATGTTAGGGGACAACATTATCATTTTATTCCATTCGGGAGTGGAAGAAGATCATGCCCTGGTACTTCTCTGGCATTGCAGATTGTGCATGTGAATCTGGCTATTATGATTCAGTGTTTTCAGTGGAAGTTTGATAATGGCAATAACAAGGTGGACATGGAAGAGAAGTCTGGCATCACTCTTCCGAGGGCTCACCCCATAATTTGTGTCCCTGTTCCAAGGCTTAACCCATTCCCTGTTATGTGATTGACGCTCCAAATGACATTAAACACCTTGTG…
Gma.153.1.S1_at	Y10491.1	At4g31940	1e-122	Metabolism	Cytochrome P450	CYP82C	ATCCACACAGATCATAACGTTTGGTCAAATCCATTAGAGTTTAAACCAGAAAGGTTCCTTACGACTGATAAAGATATA
GmaAffx.92620.1.S1_s_at	CF806894	At4g31940	1e-98	Metabolism	Cytochrome P450	CYP82C	AGCTCCTCTCTCAAGACCTCGTGAGTTTGAAGAGGATTGCACTATAGGTGGCTACACTGTCAAAAAGGGAACTCGTCTAATTACAAATCTTTCCAAGATCCACACAGATCATNNCNNNNGGTCAAATCCATTANNAGTTTAAACCAGAAAGGTTCCTTACGACTGNATAANGATATAGACATGAAGGGTCAACATTTTCAGCTATTACCATTTGGAGGTGGTAGGAGGATTTGTCCTGNAATAAACTTAGGCCTTCAAACAGTTCGTTTGACACTTGCTAGTTNTTTGCATTCCTTTGAAATCTTANATCCATCAACTGAGCCTCTTGATATGACTGAAGTCTTTACAGCAACCAACACTAAAGCCACTCCACTTGAGATTCTTATTAAACCACGTCTA…
Gma.16174.1.S1_at	AW309513	At4g14880	1e-13	Metabolism			GTTTTGGAGAGCGTTATCTATCGTCTGTGCTCTTTGAANCCGTGAAGCGAGAAGCAGAGAGCTTGGTCTTTGAGCCTTGAATGTCAAGTCATACGAGCCATTTGCTGCTTCTCAAGTTGCATTCTGTCCTTGGGTTGTGTATATATTTTTTCTCTTATGGATCTAAAAAATAAAAAGGATTTCTGTTTGCTTGTTAATTGACTAAGATTCAATAAAAATATAGTAGTTTGCTGAAANNNNNAAANNNNNNCATAATTTGTAGATCATGATGCCGCGAACTCATGCTTGTACTATTTTATTTACTAGTTAAATTTTGCTTCTTAAAACTTGTAATGGA
Gma.631.1.S1_at	AF452451.1	At4g14880	1e-137	Metabolism			AAATGCCGGGAAGCTTATTGTTGCCGTTTTTCCCAGCTTCGGGGAGAGGTACCTGTCCTCCGTGCTATTTGAGTCAGTGAGACGCGAAGCTGAAAGCATGACTTTTGAGCCCTGAATTCCCGTTTAAGGCTCTCANNNNNGAATTTTCTTGTTACTTGTACCAGGCTTTAACTAGATTGTTAGAGTACTACTGTTTGTGACTCTGACTCTAAAATAAAACTTGCTCCNAAAGACTAGTTTTTCTTGATGCCCCTGGAGCGATAATTTTGT
Gma.17998.1.S1_s_at	BI970989	At3g61440	1e-130	Metabolism	Amino Acid Biosynthesis/Metabolism		ATAGGTAGTGGAGGCACAGTCTCTGGGGTTGGACAATATCTTAAATCCAAAAATCCTAATGTTAAGATATATGGAGTGGAGCCAAGTGAAAGCAATGTGCTGAATGGTGGTAAACCTGGTCCTCATCATATAACTGGCAATGGNGNTTGGATTCAAACCAGACATATTGGACCTGGATGTTATGGAAAAAGTTCTTGAAGTTAGCAGNGAAGATGCAGTTAACATGGCTAGGGTGTTGGCATTGAAGGAAGGACTCATGGTAGGGATATCATCTNGGAGCTAACACAGTTGCAGCNCTCAGATTGGCTCAGCTGCCTGAGAACAAAGGNCAAACTTATTGTGANCTGTTCATCCAAGTTTCGGCGAACGATACCTGTCATCTGTCCTGTTCCAAGAGCT…
Gma.3362.1.S1_at	BQ454262	At1g08490	2e-92	Metabolism			GGTGGAGCTCGGTAGATATCTGTATGAGAGGCTNCTTTCAGTCCCAAATATTCGCATCTATGGGCCAGCACCTTCAGAAAAAGTCGAACGAGCTGCCCTTTGCTCTTTCAATGTTGAGAATTTGCACCCTACTGATCTTGCAACACTTCTGGATCAACAGCATGGAGTGGCTATCAGATCAGGTCACCACTGTGCCCAACCCCTCCATCGCTATTTAGGTGTCAGCTCAAGTGCACGGGCTAGTCTCTATTTCTATAACACAAAGGAGGATGTAGACAACTTTATCCATGCCCTCAATGACACAGTCAGCTTTTTCAATTCATTGATGTAACTGAAATGTATTTTTATGTATATTATATTTTGTTTATACACGAATGAGAGGGTTGGCTTAGTTGGTAG…
GmaAffx.32352.1.S1_at	AW099875	At3g55610	1e-38	Metabolism	Amino Acid Biosynthesis/Metabolism		ATAAGTCTGCTAATGTGGAGATGGCAAGGCGGATTGTACTTGATGCAAAAATAGATTATCCAGCAGCCTGCAANGCCATGGAAANCACTTCTTNTCCACAAGGATTTGATNGNANAAAGGTTGGNTAAATGATATTGTTGTTGACCTACGAACTGAAGGNGTTAAATTATATGGAGGACCAAGGGCAAGTTCTCTGTTAAATATTCCACNAAGCACANNCNTTTCATCATGAGTACAGTTCGCTGGCTTGCACTGTTGAAATTGTGGATGACGTGTATGCAGCTATTGATCATATAAATCTTTATGGAAGTGCACATACTGACTCCATCGTTGCAGAAGAT
GmaAffx.90701.1.S1_at	CF806426	At3g11670	4e-28	Metabolism			TATGCAGCTCGAAATAGTGGGTTACAGCTGTTCCTGTCATCCAAGGAAGACTAGCGTTGGTGACTATTGCAACATGTCTTTCATTGTCCAATGGAACATGCTAAGCAAGGTCGGTGCAGAATTTTTTTTCATACCGGTGCCCTGTGCTCTGAAGGACACTTGCTATTCGTAAATCCAATTCATCATTTATGTTTCCATTCCCTAGAACAGAAGATTCTTCCCCAGAGAGGGTATGCAATAGATGATGGTTTTTGCATTTGCTATACAAGCTTTCTACTATTTTGTCACATATGTCATGTGCATGCCCTTGTTATAGAGTTGCNTCAAATGTGTGACTATTAAATCACATTGTTGNATAATTAAGGAATGAGGCGGCTAACAGCTACTTCAG
Gma.10721.1.S1_at	AF074940.1	At3g17240	0	Metabolism			TTATGGCACCCAATGCAGGAGAGCTTATTCATGAAGCAGCAATAGCACTACAGTATGATGCATCTAGTGAGGACATTGCACGTGTGTGCCATGCACATCCAACAATGAGCGAGGCTGTGAAAGAAGCCGCAATGGCCACTTATGACAAGCCCATTCACATTTAAAAGGAGCCGGTTGCTACTTTCTTCTTGTTTTCATTTTTGTCCAAGAATTTTACAATGACTTGGAGATGATACATCCTGTGTTAAATTTAGATTCAGGTTTTTAAATGCAAATTAGCCCCTTGTTTACTTGTTTGCATAATAAGAGGAATGNTTGTGTTGTTCTTATCCTTGTTGAATAATATATATATCTCCCCTTCTCTCTGGGACAATATTGTAATTCTGACAGGGTGAAGAC…
GmaAffx.3725.1.S1_at	BE822926	At1g74030	8e-67	Metabolism			AGATAAAGACTGGTGCTCCTTGCCGAAGTGAGCGATTGGCAAAGTATAATCAGCTTCTTCGGATTGAAGAGGAACTTGGAAGNGTGCNATATGCCGGTGAANCTTTCAGATCACCTTAGAGTGAACNCAANTGATCNNAAAAATCTTATTCTGGAAANNNTTCTGCATCAGANTCATTGTCATCATTGANTTTACCAAGGAAAATCCTGAGTTTTGATATAGTTGCTAGCCTTCTGGGGTTTTCAGATCTACTTGATTAGCTTTAAGATATGTTTTGAACTGAAATTACCATGTGATTGGATGATAACTTGGTGCAGTAACATGGTTTCGTCGGTGTAACTTTTTTTCTTTTTTTGAAAGAACCCTGCTTGTGAATTAGTCCCCCTGCTTACGACAATA…
Gma.4516.1.S1_at	AW395106	At2g05990	1e-135	Metabolism			GATCGATTACTCATCAGCCAATGCACCTCTACAGAAAGAACTATNAGCAGAGGAGGTGGGCNACACAGCTGCCTTCTTAGCATCACCTTTGGCATCTGCTATCACTGGTACTGTTCTATACGTTGACAATGGTCTGAATGCTATGGGTGTTGGAGTTGACAGTCCAATATTTAAAGATCTTGACATTCCCAAGGACCAGCATTAAGTGGAAGCTACCCCACAAAAGCTAGTGT
GmaAffx.15949.1.S1_at	AW349503	At1g65520	3e-37	Metabolism			GGGATTCCTCTACATGAGCGAGCTTGACATCAACCTCGTTATTCCCGCGTGGTTCGTGGCTCTCCTCGAAGCCAAAATCGGCTCGCCCGCGGCTCGGCGCCACGTTGTCCTGAACGCGGCTAAGCTCACTGCCAAGGAGGCGCTGCGGCTCGGCGTCATCGACTCGGCTCACGACAGCGCCGCTGAGACCGTTGAGGCTGCGCTCGCTTTAGCCGCGGATTTGGTGAAGAGAGGATGGGTTGGACACGTGTACGCTCAGAATCGGAAGGTCTTTCTGGGTCGCGTGATTCGAGCCGTTGAAGATACCTCTGAGAGAAAGTCATACACTACTTCACGGCTTTAGCCTTTTAGGATAGGGGCTCGTGTGACATGAAGACATTTATTGGGCCGCTTTGTAAT…
Gma.12013.2.S1_at	BG046803	At4g16210	2e-43	Metabolism			AATAAAGCCCGCGAGGTATCTCTCTCAGCCACACCTTTGACTGCAGAGGNNNNNGAGANGTTGGGTTTNGTGAACCATGTNNTTGAAGAGGNTGAATTGTTGAAGAAAAGCAGGGAAATTGCGGATGCCATTGTGAAAAATAACCAAGACTTGGTNTTGAGGTACAAGGCGGTCATCAATGATGGCCTCAAGCTGGATCTTGGCCNNGCACTTTCNCTTGAAAAGGAGAGGGCTCATNANTATTATAANGGAATGACGAAGGAGCAATTCANGAAGATGCAGGAATTCATAGCTGGTCGAAGTTCCAAGAAACAGTCCAAATTGTAGGTTCTTTATTTTCGCNGATCTCTCGTGCTGTAAATGTGTATATGTTTGCTTCCCCAATTTGGGGTTTTACGA…
GmaAffx.33541.1.S1_at	BU761747	At5g25900	2e-32	Metabolism	Cytochrome P450	CYP701A	TCCTAATGAGTGGATGCCAGAGAGATTTCTAGATGAGAAATATGACCACATGGATTTATACAAGACCATGGCCTTTGGAGCAGGGAAGAGGGTGTGTGCGGGCTCTCTTCAGGCCATGTTGATAGCTTGCACTGCAATTGGCAGATTGGTTCAGCAATTTGAGTGGGAGCTGGGACAAGGGGATGAAGAGTTTGTGGATACAATGGGCCTTACCACCCACAGGCTCCATCCCCTGCTAGTAAAACTCAAGCCAAGAATCAAGTAATGATGCTATAGCATTAATGCTGCATGTCTATTTACTAAGTTTATCCATCAATAAGGCTTTTACTTTACCGTGTTTATTTTGAATG
Gma.15059.2.S1_s_at	AW620699	At2g39420	9e-42	Metabolism			TTCTCAACACAAAATACACCCTTCTACATGGCGACTGAANCNNNGTTCGAATATGAAGAGGCGAGTGAAGCTGAGATCAAATATGATGAGGAATACGTACAGAATTCTCGAGGCTTGAAGCTTTTTGCATGCCGATGGCTTCCGGCGAATGGAAGTCCAAAAGCGTTAATCTTCCTGTGCCATGGCTACGCCATGGAATGCAGCATCACAATGAAAAGCACAGGAACAAGGCTCGCAAAAGCGGGTTTTGCAGTGTATGGGATTGATTATGAAGGGCATGGAAAATCAGAAGGGGTTCCTGGCCTTGTTATGAATTTTGATTTTGTCATCGACGATTGCTCCCAACATTTCACTAGAA
Gma.3953.1.S1_at	CD412209	At3g58580	1e-150	Metabolism			TTGTCTTTTTCCCAGGTATCTCCTTNNNNGGNNNNNNNNNNNNNGNNNNNCCTTGCANTGATCTGCTNTGTATTATGCCACCTTTGTCTCATAGAAAAATTATGATAANGCCTTACTGATTTTCGCCCATATCTTACCCAATCTTTTTTCCCTATAAAGTGAAAATTTTCTTCGTNCGTTTCCATTGGTTCAATATGTAGCAATTAATCGCCCCATTCTCAAGCCATTCCGATCTTGTGGCTAATGAGCCTTGGGCTTTANNANCTCACTACTGTAGTGATAATATTCACAGCTTAGGTTATTTTGTATCTGCTTGATCATCAGAAAGTAGACAAATTCGAAACGGTATATATTGATATTAAACAGAAAAGTGTTTATGAGAATACTACCAGTAAGAAG…
Gma.1445.1.S1_at	BQ454241	At1g80820	2e-88	Metabolism			ACAGGCGTATGTTCATGTTAGGGACGTGGCATTGGCCCACATACTTGTTTATGAGAAGCCTTCTGCCTCTGGTAGATACATATGTGCCGAAAGCTCTCTCCACCGTGGAGAATTAGTTGAAATTCTCGCCAAGTATTTCCCCGACTACCCAGTTCCCACCAAGTGTTCAGATGAAAAGAATCCGAGAGCAAAACCCTACACTTTTTCAAATCAAAAACTGAAAGATTTGGGATTGGAATTCACCCCAGTGAGTCAGTGTTTATATGAAGCCGTCAAGAACCTGCAGGAGAAAGGGCACCTTCCTGTTCCTGCAAGGCAGCAGGAAGATTCAACTACTGTGAAACCTTAAACGAGCTATCCCTTTTTATCTAATTTGTCAACAAACAAGAAGCTGCAGCT…
Gma.5491.1.S1_at	AW309940	At2g23910	7e-61	Metabolism			TACGAGGATGTCTCATCCTACGGTCGTTATTTGTG
GmaAffx.90414.1.S1_at	CF806139	At2g23910	1e-14	Metabolism			CGTGACCGTTGATTTAGCTTTCTTGGTGGACGCCCACATCTGTGTCTACGAGGATGACACATACTACTGTCGTTNTTNGNGCTTCAATCACATCATAAACACCCATGAGGACGCTGTTCAGCTCGCCCGCAAGTTGACGCCTGGCGCATCTTCCTCCTTGCCGCANAGTGATGACTATGGGAAGAGTTTTATCGAACAGAGAATTAGCAACACGAAGTTGAACACATTGCTGGTGGACTTCGAGGCATAATCGACTCCCATGGTCATCCTTTTGGACGGTGATTAGAGCAATCACCTTGGCTGTCTTTCTGCGGGAAAGT
Gma.10468.1.A1_at	BI969886	At1g22610	8e-26	Metabolism			TAGTTGGCCTCTATATGCTACGTCATCCTCGGTTTAGGAGCAAGATGCCATCGGTACCAGTTAATTTCTTCAAGAGATTGCCTTCCAAATCAGATATGCTGATATGATGACCCGCTTCTGTTTCTCTTTTCTTTTTATCCATCATCCACCACCTAATAACGTATGAATAAACACACCTTCACCATTACAACACGTAAATTAAAGAGGGTACATCAAATATGTGCACATACATAGTACCCCTCCAATTTCATTAGCAAAAACACACTTTCATTGTATGA
Gma.15863.1.S1_s_at	CD413163	At4g25700	1e-101	Metabolism			CGAGCTTAACGATGTATTTGCAATAATCAACGCTGTCCCTGCCATCGCTCTCCTTTCCTATGGTTTCTTTAACAAGGGACTGGTCCCTGGCCTTTGCTTTGGTGCGGGTCTTGGAATTACNGTCTTTGGGATGGCCTACATGTTTGTACACGATGGATTGGTTCANAAGAGATTCCCGGTGGGCCCCATNGCNAACGTGCCCTATCTCAGAAGGGTGGCCTCTGCTCACCAACTT
Gma.2195.1.S1_at	BE823097	At3g13750	1e-179	Metabolism			GGAGATCCATGTCCAAATGTCTTGAAGAAACTCTCAGTGGAAGCTATTTGTTCCTGATCATTTTAACCTCAGAAAATAAATNGATTAAANTCTCNNCAGATTGATTTTTCCCACCACTATTCATTTNAATACAGTTCTTTTGGGTCAACCAAAGTCTACACTTCTGAATCTGATCAACACAAGCATTATTATTTTGGCTTTACCAAGGTGAAGTTGCAGAAAACACAACACACCATATGGTTGAAAGCCTGTAAAGATTGCTGAGATGATTGTGGATATGTGTATATACTTGTGTTCTGCATGTTATACAGAGGTGAAAGGTGATGATTTGCTTGGTGCACTATGAGACGATACNGAATNNTGANNNNGTCCATGTGCTAGTGTTTTAGACTTAGNTGT…
GmaAffx.33518.1.S1_at	BU760871	At3g13750	9e-62	Metabolism			TACGAGCTATGATTACGATGCGCCCCTTGATGAATATGGATTGGCCAGACAGCCAAAGTGGGGTCATCTGAAGGATTTACATAGAGCAATAAAACTCTGTGAACCTGCTTTAGTATCTGGAGATTCTACTGTACAACGGCTTGGAAACTATGAAGAGTGGCATTTGGAAATCAGCATTACAACTTGCCTCCTTGGTCTATAAGCATTCTTCCTAACTGCAAGCACACTGTTTATAACACTGCAAGGGTTGGTTCTCAGAGCACAACAATGAAGATGACTCGTGTTCCTATTCATGGAGGACTATCTTGGAAAGCGTTTAATGAAGAAACAACCACTACTGATGATAGTTCGTTCACTGTGACTGGCTTGT
Gma.9081.1.S1_at	CA803057	At2g22230	5e-81	Metabolism	Fatty Acid Biosynthesis		GAATACAATCCTGGAGTTTCTGCAGTGGCTATAAAGAATGTGACAATAAATGACAACTTCTTTCCTGGACATTTTCCAGAAAGGCCCATCATGCCTGGTGTTCTAATGGTTGAGGCAATGGCACAAGTTGGTGGTTTGGTCATGTTGCAACCTGAAGTGGGAGGNTCTCGTGAAAACTTCTTCTTTGCTGGAATAGACAAAGTGCGGTTTCGTAAGCCTGTGATNGCTGGGGACACCTTAGTTATGAGAATGACACTTACTAAGCTGCAA
GmaAffx.49521.1.S1_at	AW348568	At5g65780	5e-54	Metabolism			TATTTGGAGGAGGTTTCTTCATGCAACNTTTTNGTTGTTAAGGGTAACGTTATTTCAANCTCCAGCTATTAAAGGGACAATCCTACCTGGCATTACTCGCAAAAGTATAATTGATGTTGCTCGAAGCCAAGGGTTCCAGGTTGAGGAGCGATTAGTGTCAGTGGATGAATTGCTAGATGCTGACGAGGTCTTCTGCACGGGAACAGCTGTGGTTGTATCACCTGTTGGCAGTATTACTTATCTTGACAAGAGGGTAGCATATGGGGATGGTATTNGCGTGGTTGCACAGCAACTTTATACTGTCCTTACCAGATTACAGATGGGTCTTACGGAGGATGAGATGAATTGGACTGTTGAGCTGAGATAAGCGCNCCATGNATAGTTTGCAGTTCATGTTTT…
Gma.4351.1.S1_at	BE023594	At1g49670	1e-144	Metabolism			GAACACCTTTCATATCATGAACAATTGTATATTTTGACTCTCGGTGAAAA
GmaAffx.76816.1.S1_at	BI701447	At1g49670	2e-49	Metabolism			AAAGGTCTTGCACTAGCTCTTGCAGAGAAGGGTGTATTTATCACGATCGTGGATTTCTCTGAAGAAAAGGGAAGACAAGCTGCAATCCTCGTCGAGAAAATTAACTCCAATTTTCATTCTAAGTTAGGATTTCCGTCTGCCATATTTGNNNNANNNNANGGGATCTAGCTGCTGCATTTGAAAAGCATTTTTTGACATATGGAGGACTAGACATTTGTATTAACAGTGCGGGGATTAGTAGTTCTGTACCATTCCGTGATGATCAAACGGATGGCACCCGAACATGGAGATACACTGTTAATGTGAATTTCACTGCTGTTATTGATTCCACTCGCCTTGCGATTAAAATCATGGAAGCTTCCAAAAGGCCTGGTGTGATTATCAACTTGGGTTCTGCTT…
GmaAffx.93379.1.S1_s_at	CF809104	At1g49670	5e-43	Metabolism			GTTATTGGCATGATTTCTCAGTATCAAGGAGAGAAGGGTTGGACGCCATCAAAATACCCTGGACTATTGGAGAAGCTCTTAGCAAAGAGCCAAACAGTGTCTGGCTTTTTCCTGGTGCAATATGGTCACTTGTGGCAAGAACATCTTGACAGACTATTTAATCTTTACTCTTCGGGAAAGCTAAAGGTTGCTATTGATCCAAAGAAATTTATAGGCCTGCATTCTGCTGCAGACGCTGTTGAATATCTCCATTCAGGCAAAAGTGTTGGGAAGGTTGTCGTCTCCGTGGACCCAAGCTTCCTTCCTCAAGTGGCCAAATTGTGAATCAACCCATGTCAAATGACCTCACAGATTATATTATAGCTCTTTCAAATTAAAAAGGATAAGTTAAACGTGCAG…
Gma.15625.1.S1_a_at	U77678.1	At3g47340	0	Metabolism	Amino Acid Biosynthesis/Metabolism		TTGATGGCCTTAAGGCCCATGCTGCAAAACATGTGACTGAAAAAATGATGCTTAATGCTGGTAACATTTACCCCCACAACACCCCAAAAACCAAGGAAGCATATTACTACAGAATGATCTTTGAGAGGTTCTTCCCTCAGAACTCAGCTAGGCTCACTGTTCCTGGAGGAGCAAGTGTTGCATGTAGCACAGCCAAAGCTGTTGAGTGGGATGCTGCTTGGTCTAACAACCTTGATCCCTCTGGTAGAGCAGCACTTGGAGTGCACATTTCAGCCTATGAAAACCAGAACAACAAGGGTGTAGAAATTGAGAAGATAATACCTATGGATGCTGCTCCCCTTGGTGTTGCCATCCAGGGCTAATACAAAGATGTGACAAAGAATAATTTGGGCGACAATG…
Gma.197.1.S1_at	U55874.1	At3g47340	0	Metabolism	Amino Acid Biosynthesis/Metabolism		CCCTCAGAACTCAGCCAGGCTGAGTGTTCCTGGAGGACCAAGTGTTGCATGTAGCACAGCCAAAGCTGTNGAGTGGGATGCTGCTTGGTCTAACAACCTTGATCCATCTGGTAGNGCAGCACTTGGAGTGCATGCATCAGCTTATGGAAATCAGGTCAAAGCTGTAGAACCAGAGAAGATCATACCAAAGATGGAAGTTTCCCCACTAGGAGTTGCCATATAGAGCTAGTATGAGCCATAGCAAAAACTAGTAGTTGCCCTAGAACCAAAATATATTATTATACTAGTCATCAATNACTCATTAATCATCATAAATGAAAATTTGGCCTGCTGTGTAGTTTATTCAGGCAAGGCTATATATAAATA
Gma.17486.1.S1_at	L09702.1	At4g31990	0	Metabolism	Amino Acid Biosynthesis/Metabolism		AACCCAGTTCTCTTTAATGAATGGAAAGCAGAGATGGAAATGATGGCTGGAAGGATAAAGAATGTTAGACAGCAGCTATATGATAGTATTACTTCAAAAGACAAAAGTGGAAAGGATTGGTCATTCATACTTAAGCAGATAGGCATGTTCTCATTCACNGGCTTGAACANGAACCAGAGTGACAACATGACAAACAAGTGGCACGTATACATGACAAAGGATGGAAGGATTTCCNNGGCAGGATTGTCGTTGGCTAAATGCGAATACCTTGCGGATGCTATTATTGATTCATATCATAATGTCAGCTGAAACTCAATTAGATATTTTTGGTGAGTGTTATACCCAATCGGAGCGATTGGCATACATGAAAATAATTTAGAATAATTTATGTATGCATTA…
GmaAffx.30368.1.A1_at	BE820805	At3g10030	2e-13	Metabolism			AGAGCATTATGTGGAGATCAAGTTGGCACTTTGATTGATCAAACTGGTAGAGTGGAGCATTAGCTTCCAAGTTAATCGTGCATGATTTGGTTGTAATCAGATTATGGCGTCACTTAATATTTACACAAGGGATCCCTTGATTTGTTTCTGTATTGTTTGTTTTTTAATTGAGGCGTTGCCTGTTAGCTAATGTATTTACCGCGCACTACTGATTCATTAGATTTACCACACATGTAACTTAAGTCTGA
Gma.920.1.A1_s_at	AI899853	At2g35040	1e-34	Metabolism	Purine Base Biosynthesis		TTGGTCAGTGATGCCTTCTTCCCATTTGCATGGAAAGATGCTGTGGAAGAAGCATGTGAGAGCGGAATCGGTGTTATTGCAGAACCAGGTGGGAGTATCAGAGACCAGGATGCCATAGACTGTTGTAACAAGTATGGTGTTTCNCTACTCTTTACCAATGTGAGGCACTTTAGGCACTAACCTAGNTTTTTTGNTTNGGAATANCTTCATGCTTCCATCATTCAAGCGGTGTTNCTGAAACTTGTGCTTCCAATAGGTAGCNCTGAAACCTGTTTTTGAAATCAAGTGACTGTATGAGTAAGATTGTACTATCCAATTTATATAGAAAAATAAAAATTGATGTTCTGCTACTTTCTAATGTCTTATGTACAT
Gma.3345.1.S1_at	AW394524	At1g22440	4e-83	Metabolism			TACTTTGCCATTGGGTCTTTTTGCCATTCTGCTTGGTAGAACTTTGAAAGGTTCTGTTTTTGGAGGACTCAGGGCCATTTCAGACCTTTCCATTTTAGCTGACAAAGGCCACAAAAAGGAATTCCCTCTTCAAGAACTCTTCACCCATGAGGTCACATTAGCAGACATAAACAAAGCATTTGAGCTACTAAAACAACCCAATTGTGTCAAAGTTGTCATCAACATGCCATAGTCATATTAGCGCAATTGTAGGTAATCTTCGGCAAAGTTTGAAAAAGATTCACGTNTCACTCTTTATCAATTACCATTGTCTCTCTCTTTGTCCTTCTCTANGCATGTGTGTATGTGGAACCCAGATCCTCTGCCACGATCCTACCACCTACAATAGTATTTTGTCCG…
GmaAffx.93605.1.S1_at	CF809330	At1g23800	8e-08	Metabolism			GAAGGCTGTCGTTAATCCCTTGAAGAACCCAGCATGGCTTTGAGAAACACTAGTGCCTTCCTTGGATGATCAACTATCAGTGCCTCAATGATAATGATGATAAAAACAAAATCCTTTTTTTTTTTTGTTACACGAGTTGAGTTATGACATTGTAAACATAATAGTAAAGAATCTTGTCAATGAAGTAAGTGTCTATGCTGTGCGTGCTACTATATATATAT
Gma.15232.1.S1_a_at	BE819915	At1g54100	0	Metabolism			GATGCTCCTGTAGTTAAAGAAGAATTGTTTGGTCCAGTTCTGTATGTTATGAAATTTCAGACTCTGGAAGAAGCAATTGCCTTGAACAATTCTGTACCTCAAGGATTAAGTAGTTCAATCTTTACCCAAAGACCTGGAACTATATTCAAGTGGATTGGGCCACGAGGTAGTGATTGTGGTATAGTGAATGCAAACATACCTACAAATGGAGCTGAGATTGGTGGTGCCTTTGGTGGAGAAAAGGCGACCGGTGGTGGCCGTGAGGCGGGAAGTGACTCGTGGAAGCAATACATGCGGCGTTCTACATGTACCATCAATTATGGAAGTGAACTACCATTAGCTCAGG
GmaAffx.1968.1.S1_at	BE657555	At3g05020	1e-29	Metabolism	Fatty Acid Biosynthesis		AAACATGTACCAGATAAAAAATTATTTCTGCTAGACATGCATAGTTTTATATATTTTAGTATTGCGGGGTATAGTCTGAAGTGTTTTATAT
Gma.2281.1.S1_x_at	BI317540	At1g54580	9e-27	Metabolism			ATGCCGATCAATATTTATGGTGTGGGGNCAATTNNGAGTCTCGAGTGTTTTAGTTGTGAACTCTGTTGNNNCGTGATTAAANCAAGTCTGAGAAGAAAAACAAATTAGTCCAACCTTTTGTTTGTTTCTGGAAGTTAGTTATATNAAGTTGTGTTTTTGCNTTAANGGGTTTTTGTCAATGATATGNTAATTTTAATAGATGTAGATTTATGTCAATGATATTGTATGTTAATTTTATTCAGTCTCGTATCTAGCTGAATAATTAAGAATTATACTACGTCATGCCTATAACACTTGAGGTGCTTAAA
Gma.1838.1.S1_s_at	BM270054	At2g44620	8e-41	Metabolism	Fatty Acid Biosynthesis		AAACTGCAGCCATGGCGTGCCATGTCATCACACGGCGACGATCATCTCTCCAAAGAGGAGGTCGTCGAAAGAGTCCTCGCCGTCGTCAAAGATTTCCCCAAAGTCGATCCTTCCAGGGTGAGTCCAGATGTACATTTCCAGAAGGATTTGGGTTTGGATAGCTTGGACAATGTGGAAATTGTAATGGCACTAGAAGAGGAGTTCAAGCTAGAGATCCCAGACAAGGAAGCTGATAAAATTGACTCTTGTCATCTTGCTATTGAGTACATTTCTAACCATCCCATGGCTGGTTAACTAATGTGTCCTTTTTCCTATTTGGCTTCATGTTGAACTTAAACANCAGTGCAACCTTGAACCTTCCCCTTACTTTCACTGGATGTTT
Gma.3115.1.S1_at	CD392633	At3g05420	2e-91	Metabolism			AAACTCGTAACTCTGATCTTTGCAAGGAACTCCAATCAATACGTGGTCAGCTTGCTTCTGAGCAGTCAAGGTGTTTCAAACTTGAGGTGGAGGTTGCTGAATTAAGTCAGAAGCTCCAGACAATTGGGACACTACAGAAGGAACTTGAGCTCCTGCAGCGGCAAAAAGCTGCATCCGAGCTGGCTGCCCTGAATGCAAAGCAAAAGCAGGGTTCAGGTGGTGTATGGGGTTGGCTTGCTGGTGCTCCTCCCCCNACCCAGAAAGAAGATGATGGGTGATCGCGTGATTAAACTAACTGGATTACNATGCTGCATTTAGTTTCATTAGCCCATTTTTACATCCAATACACTTATTTTTTTTATTCAATTCTTTTTTTGGTGAAGGGAATAAAATTTAGCT…
Gma.254.1.S1_at	AF404403.1	At4g16760	0	Metabolism			GAAGTTCTTTGCAGCATTTATGCTTTGTTTCTACTTCATAANCATCTGGGTGATTTTCTTTCCACTGGCTGCATTAACCCAAAACAAGGATCACTTGCNAGTGAGCAGCTGAGAAACTTNTATTCACAGGTNCGTCCTAATGCAATTGCGCTTGTTGATGCATTTAACTACACTGATCACTACCTTGGTTCAATTCTTGGACGTTACGATGGAAATGTGTATCCGAAGTTGTACGAGGAGGCATGGAAGGATCCTTTGAATGATTCAGTTGTTCCTGATGGCTTTAAAGAGTATATTCAACCGATGCTTAAGCAGCAACTACGTAATGCTAGGCTGTAGTTNATTTTGTGGCAATGATGCTTTTGGCATCTAAGAAATTTACCCAGACTATTCTGATTT…
Gma.3717.1.S1_a_at	AW350536	At1g01710	1e-160	Metabolism			GTGCTGTGAGTCTGGACCACTCCATGTGGTTTCACAGACCTTTACGAGCTGATGACTGGATACTATTTGTGATCTTTAGTCCTACTGCCAATAATGCACGTGGCTATGTCACTGGCCAAATGTTCAATCAGAAGGGAGAGCTACTTGTATCAGTGGTTCAAGAAGGTGTAATGAGGGAAGTTATTTCTGC
Gma.4269.1.S1_at	CD407626	At1g27450	7e-82	Metabolism			CATAGATGATCTTATTGCCACTGGGGGAACGTTAGGTGCTGCAATTAAGCTTCTAGAACGTGTTGGGGTGCATGTTGTGGAGTGTGCTTGTGTGATTGAATTGCCAGAGTTAAAGGGGCGGGAAAGGTTGGGAGACAAGTCGCTATTTGTCTTGATTAATGGGGGAGCCTGATCTTTTTTCCAAGTGATTGTGTTTTTATTAGCTGGCTCTTGTTAGGAGCTTTATTGATGACTGCTTAGATTTCCTTAAGATANATTTTGATGCTGCGGAAACGGAAAGCGTGCTTTGTTTGAGCGCGCTCAGTTCTGCTCAATTATTATTATTATTATNNNCTTCTGTGAGTCCCGTTTGGTAATGACGATTGAGAGAACGATGNCTATAATATAGGACTTGCTTGC…
Gma.2427.1.A1_at	CD407874	At4g22570	3e-25	Metabolism	Nucleotide Biosynthesis/Metabolism		GCTATGGACTTGTTAGAACGTGTGGGAGCAGAAGTNGTGGAGTGTGCATGTGTAATTGAATTANCCAGAATTGAAGGGTCGTGAACGTTTGAACGGGAAGCCCTTGTNCGTGTTGGTNGAATATGTGGANATATGATNATNANGAAGTGNGCAAAAGAATATTAAGATGTAGATTTGGGAGATGATGTGTCTTTCAGTGGGTGCTTTCCCATTCNGATTNCAATTCTAGCTTGTAGTAGGAACGATCAAATCAAATT
Gma.4937.2.S1_at	AW100099	At4g35830	3e-77	Metabolism			AAACTACGAGATGGTGTCACAGCTACTGACTTGGTGTTGACTGTTACTNNNNNGNNNNGAAAGCATGGGGTTGTTGGCAAGTTTGTAGAGTTTTATGGGGAAGGCATGAGTGAACTGTCTTTGGCAGATCGTGCCACNATAGCAAACATGTCTCCTGAGTATGGTGCAACCATGGGCTTCTTTCCTGTGGATCATGTCACTTTGCAATATTTGAGACTGACTGGCAGAAGTGATGAGACTGTTTCTATGATAGAATCNTANTTACGAGCAAATAAGATGTTTGTGGATTANAGCGAGCCCCAAGTNGGANANAGTGTACTCATCNTATTTGGAACTCAATCTTGAGGATGTAGANCCCTGTGTCTCAGGTCCAAAAAGGCCTCATGACCGTGTCCCTTT…
GmaAffx.15177.1.A1_at	BU548038	At2g36840	6e-75	Metabolism			TTAGGATGGAACTACTTCGTCCGCTCAGAATAACTGTTGTAAGCAGGGGTCCTGATACAGAGCTGCTGGTTGCAAACCCTGTGGAGTTGTCGGGCAAAGGACGACCTCTTGTTTTTTATGATATTACTCTTGCTCTCAAAATGCTTGGCCCTTGCATATTTTCGGCTGAAGTTGGAAGACATGTGGTTGGAGACCGCGAGTGGGAAGTTTATAGAATCTTGCTTGATGAAGGGGAGGGTTTATCCATTCCAAGGAATAAGATTGAGAAAGGAGTTTGGAAGATGTTGATGGGTTGGGAGTGATCCATGGCTGGTGGCATTGTTCATCTTGGATGAACCTGTGCCCGTGTACAGATAACATGGTTATAATGTAGTTATGATATGTAACTTGTAATTATGA…
GmaAffx.44442.1.S1_at	BQ741278	At3g22200	1e-78	Metabolism			TGCTCACGAAAATCTCCTTCAGGCTCCCTTATTGTCTAGATCAAATAGCACTGAGGCTTCATTGGCAAAGGATAATTCCTCTAATGATGTAAAAAATGGTCAAGGGTACAAAGGTCATAGTATGCTTGCTCCTTTCACGGCTGGGTGGCAGTCTTCTGATTTGCACCCTCTGATCATAGAAAAGTCAGAGGGAAGCTATGTATATGACATTAATGGGAAGAAATATCTTGATGCACTTGCTGGTCTATGGGCCACTTCTTTAGGGGGAAGTGAGCCACGCCTTGTTGATGCTGCCGTTGCACAACTAAAGAAGTTGCCATTTTACCATTCCTTTTGGAATCGAACCACATTACCTTCTTTGGATCTAGCAAAGGAACTCCTAGAAATGTTCACAGCCAG…
Gma.3546.1.S1_at	CD393802	At3g48560	1e-106	Metabolism	Amino Acid Biosynthesis/Metabolism		ATCCGTCTAGCGAGAGCGAGATATTCCCAAACATGCTCAAGTTTGCTGATGCTTGTGGGATACCGGCAGCGCGAGTGACGAAGAAGGAAGAGCTTAGAGCGGCAATTCAGAGAATGTTGGACACCCCTGGCCCCTACCTTCTTGATGTCATTGTGCCNCATCAGGAGCATGTGTTGCCGATGATTCCCAGTAATGGATCCTTCAAGGATGTGATAACNGAGGGNGANGGTAGAACGAGGTACTGATTGCCTAGANCAAATGTTCCNTGATGCTTGNTTTGTACAATATATATATAAGATAATGCTNTCNTAGTTGCAGGATTTGGCCTGTGGTGAGCATCATAG
Gma.4468.1.S1_at	CD414593	At5g48230	4e-74	Metabolism			GTTGAGCTTCAGTAAGACCTATTTCATGTTCAGTAGATGTCCTTTTAAGAGCCAGCGTTTGATGCAAAGCTCAAAAGATCTTGCCTCCCTCTTTAGCAAGCGAACATGCAAGTTTCAAATTTATTACAAGGACAAGACCGAAAGAGAGCGAAATTTAGCTACAT
Gma.8414.1.S1_s_at	AF007100.1	At5g35360	0	Metabolism	Fatty Acid Biosynthesis		GTGATGTCAGAATTGCTTTTTGTAATCGCCGTGTTGTCAGTGCCTCGAAGTGAATGTTTTAATGAAATTTTGATAATTAGTCTCGTACATTCCNTTTCNTCACATNATTATATTGTAAAATCAATTAATTCANGTTTGATTTCATCCCNAATATTATTGCAAGGAATTAAGAATAGGTCCTTGCATTTTTTTCGGAAGTCATAGTTGTCACAATGGTTGGTTTAGAGGATCTTGTATTA
Gma.16155.1.S1_at	CD417819	At1g29890	1e-136	Metabolism			AGATTACAGAGACAGTACCCTTTGAATTTGCTGTGCTGAAAGGAGACTAGGAGATTTGGATTAAAATAAGGGTACATGGAAATGTGGGATCTCTTTTGGAGCAGTGTTTCTATAGTTGTGGGAAATAGTATCCTCGATGGCGGCATCAAATATAANCGTTGAGTGTTGGTTTGCATNGGAGGTTGGCAGATGAAAAGGGGGATTAACCCCGAAGGANTTTGAACCAATTTTCTATAAATTCATTTNTGCTCNNACACNTAAAANGAGNAAAAGGTAGGATCGTCATACAAATCCGTCGTCTTGGCTTCGAAGAAATNCAAGATTCATTTCATTACCCGTTCCTGTTCAATTTTCATTGTCATTTTTTGACTTTTTCGTCTGTGAAGGATAAGGAAATAT…
Gma.4358.1.S1_at	BM308967	At5g57890	8e-68	Metabolism	Amino Acid Biosynthesis/Metabolism	Tryptophan Biosynthesis	AGGGAAGATTGTTCGTGCTCCTCATGGTGTCATGCATGGAAAAAGCTCAATGGTTTACTATGATGAGAAAGGAGAAGATGGAGTACTTGCTGGACTATCAAATCCTTTCTTGGCTGGTAGATATCACAGCCTTGTAATTGAGAAAGGTAGCTTTCCTGATGATGAACTTGAGGTTACAGCCTGGACAGAAGATGGTCTTATAATGGCTGCTCGTCATAAGAAATATAAGCATCTACAGGGAGTTCAGTTTCATCCCGAGAGCATTATAACCCCTGAAGGCAAGACAATTGTCCATAATTTTGTCAAGCTTATTGAGAGAAGTGAGGCTGTTGGTTCTTGAAACAATGTTTGCTGTGTATAGTTAAAATTGTGGTTTGACACAACAAACTAAAATAAAGA…
Gma.15775.1.S1_at	BU765934	At2g37790	1e-122	Metabolism			AATATGCTTCATAGAGATGTTGACAAATGCACTGCTCCTCAAGCAGATTGATTCCGCCTTTTACCTGTTAAGATCTTAAAGCTACCAGCTGTAGTGATTCAAGTATGTTTGAGATTTTGAGAAGAGCTATTGTTCATAATAACACAAAGTAACCGAGACTTATTTTTCATTTATAATTGTTGTATCTTTAATTCAATCTAAAGAAACCAGTGCAGTGAATTTTAAAGGTCTGGTAGCCAA
Gma.9686.1.S1_at	CD394819	At1g59950	7e-67	Metabolism			GACCAAGCAGATTGCACAGGCTCATGGCAAAACTGCAGCTCAGGTATGTCTTAGATGGTTATTTGAGCAAGGTGTGACTTTNATACCAAAGAGCTACAATAAAGAGAGATTAAAGGAAAATTTAGAGATATTTGATTGGTCACTCACCAAAGATGACCATGAAAAGATTAATCAAGTCAAACAGGAGCGTATGTTCAAGTACGGAACAGCAGCATTCCCGCTTCCTGATCTATTTGATGGGGAAACTTAGTAATACATTATCAGCTTCAATATTCCATTTTCCTTGGGATTTAGGTTTCTCGTGTCTGTGACACAATAAAAGGATGAAGTGTAATCTGTCTTTAGAATACCCTTAAAGAAACTCAAAATTGAAATCACTGGTTTCACTTTTTGTGGGAA…
GmaAffx.54522.1.A1_at	BG511804	At2g44660	0.004	Metabolism			ATTTACCCATGTTACTTGTGTGTGCAGTATCTTGCTATTCAATTTTTCCACTACTANNNGAGGCACGAGAGTATCCGATCAAAGTATTGTTGCTGCTTCTGCACTCCATTTTAATGTGGTCAGGATTTTCAGCACAATTTTATGATGGGGCTGAAGCTACAAGAGTGCCAACTGCTAATTCAAAGAAAAAAGCTGATCAATTTGGATCTGAAGGTAATTCGGGTGCAACTGTGAAGAAAGGTTTTGCTANNNGCTGGATTGAGAGGATTTATCTGATAGGTCNNNTAGTTGTAGAGATATGGGGCCAAATTTTACACCCTCTACTTTTTGGTGATAAGTTTGCATTTGCACCCCTCATGTTGATCTCCATATACTGTGCTTTTGGGATCATGTACTCTT…
GmaAffx.90376.1.A1_at	CF806101	At1g55740	4e-52	Metabolism			ATGCAGCCTTTGCATCGTTCCCATACAGTATGAATTGGTTGCTCTTGGTTTCATTATGCCTCATTTTTAAGAAGTTCATTGTAGTTTCGTTAAGCTAGAAAAGAAATATACGGATAGAAATGCATTAAGATTAGCCCGCATATCCTTTAAATGGA
GmaAffx.87417.1.S1_at	BM568072	At3g57520	3e-66	Metabolism			AAAAGTCTATCACAGGGAGGTACACCTCCACGATTCCTCATCATAGATGATGGTTGGCAACAGATTGAAAATAAAGCAAAGGATGCTACTGAATGTTTGGTACAAGAAGGAGCACAGTTTGCTACTAGGTTGACTGGTATTAAAGAGAATACTAAATTTCAAAAGAAATTACAGAACAATGAGCAGATGTCAGGTCTGAAGCATCTAGTACATGGAGCAAAGCAGCATCACAATGTGAAAAATGTATATGTATGGCATGCACTAGCTGGTTATTGGGGTGGAGTGAAGCCAGCAGCAACCGGCATGGAACATTATGACACTGCCTTGGCATATCCAGTGCAGTCACCAGGCGTGCTA
Gma.1426.1.A1_at	AI443364	At1g13280	2e-13	Metabolism			TGTTCTACACCTTCTATTTGAAGGGTGTTCCTGATTTGCCTCCTGAACTGCTTGGGAAACCTGTTGAACCTTCACCAAGTGTTGAGCCTTCTCCTGCTGCTATGGCTACCGAGCCTCATGCCTGTTTGCCAAACTTCACCAACTGATAATGATTATGATGATGCAATTGAGCCTTTTTTGTTTTTCAGGAAATTTTAGTTTTGAACCCAAAATAAAGTCTAGGTGTTGCATATTGACTGTATACCAAAATTCGCCAACTGATGATGATGCAATTGAGTCCTT
Gma.8020.2.S1_a_at	BG789780	At1g13280	4e-58	Metabolism			CTTGCAACAAGTTCACAATTTAACCACCTGTTACTTGT
GmaAffx.23723.1.S1_at	BU551281	At1g71990	2e-96	Metabolism			AGAACACTTTTACTGAGAGCTACGTGACAGAGAAGTTATTCTATGCCTTAGACTCTGGTGCAGTTCCTATCTATTTTGGTGCACCAAATGTCATGGATTTTGTCCCTCCACATTCAATAATAGATGGTAGAAAATTCAACTCATTGGAAGAGTTGGCTTCGCACGTGAAGGCTGTAGCTAATGATCCAGTAGCCTATGCAGAATACCATGCATGGAGAAGGTGTGGTGTACTTGGTAACTATGGAAAAACTCGAGCTGTGAGCCTTGACACGTTGCCATGCCGATTATGTGAGGCTGTTAGCAGAAAAGGTGGAAGAAATGCGGGAAGCTAGGTTGAGTTTTTTGCTAAATTTGTAGTTCTGCATGATAGAGATTGACGCATTGAATTTAGGTTTGCAA…
Gma.2666.1.S1_at	BM092062	At1g69830	5e-71	Metabolism			GTTTTCTATGACCACTTCTATGACTGGGGTGATTCAATTCGGGAGCAGATTGTGAAGTTGATTGATGTTCGCAAGCGTCAAGGTATTCAAAGTAGATCATCTGTGAGAATTCTGGAGGCCAAGCACGACCTTTACTCTGCAGTAATCGGAGAGAAGGTGTGCATGAAGATTGGAAATGGTTCATGGTGCCCAACTGGGAGGGAATGGACACTATCAACTTCTGGTCACAATTATGCTGTGTGGCACAAGTAGTGTTCTGTTGGCATGTCATGACCCTTCTCCACTGGAATCACAGAGAAGAGAAAGGAATTACGTGCTTNNNATATGCTTCTGGAGTCTTAAGCTTGATAAAATTGAAGCTATTTCCTTAATCTCGCAGGCTTTGGAAAGCTCTTTAAT…
GmaAffx.50033.1.S1_at	BU550874	At3g57610	8e-60	Metabolism	Purine Base Biosynthesis		GTTTCTCATCGTTGAATCTTACCAAGCTNGATGTTTTATCAGATCTTGAAGAAATACAGTTNGGTGTCTNTTACAAACTTGCTGATGGCACCCCAATCAAATCATTCCCTTCAGATCTNCGTCTTCTTGAGCAACTGAAGGTGGAATATGAAGTACTTCCTGGATGGAAATNTGATATNTCTTCCATAAGAAACTATTCTGACCTTCCAAANGCTGCNAGGCTGTATGTGGAAAGGATAGAAGAACTTGTGGGGGTCCCTATTCACTACATTGGTATTGGGCCAGGACGTGATGCTCTCATATACAAATGAGTTCACATTGGATTTGCATGCCTCTGTAGGTAAGTTGAGGCTTTTTGCGGTAGAGGTGTCGATTCCCGCTAAGTTTCAGTTTTTTTGG…
GmaAffx.27805.1.A1_at	BI892863	At2g22250	1e-40	Metabolism			GGATTTCTTGGTTGAAAGCTTTAGAGAAATGGATGGTGTGAAAATATCTGAACCACAGGGAGCATTTTATCTATTCATTGATTTCAGCTCCTATTATGGAAGAGAAGTTGAAGGGTTCGGTATAATTGAGAATTCTGACTCCCTCTGTCGATACCTGCTGGACAAGGGCCTGGTTGCCTTGGTGCCGGGGAGTGCATTTGGAGATGATTCTTGCATCCGCATCTCTTATGCCGAATCCCTTACTAATTTAAAGACAGCCGTGGAGAGGATTAAGAAAGCACTTATCCCTCTAATTAGCTCTG
Gma.14855.1.S1_s_at	BU550191	At4g33680	0	Metabolism			CGGCCGAAGCTCATGGGATGTATTCGCTGAGATTCTTGAGAAGACTCATGTGGTTACAACCCCTGGTAGTGGTTTTGGACCTGGTGGTGAAGGTTTTATCAGGGTTAGTGCCTTTGGTCACAGGGAAAATGTCTTGGAGGCATGCAGAAGGTTCAAGCAGCTATACAAGTG
Gma.10473.1.S1_at	BG790969	At4g36480	3e-23	Metabolism			TCTGCTTGAAAATATCGCGGAACGGGTTTTGAAAGAAGAATCTGTATTTGTGGTTGTTTCCAAAAGATCAACATTGGACAAATGCCGTTTGCCTGTGGGAATTAGATTGTTTGTTTCTGCTGGGCATTCAGAGTCTGATCTGCTCAAGGCATCTGAATCATTGAAAAAGGTTGTAGCATCAGTCCTGGGTGGTCAGAATTGAACGCTCTACATCTTTCTTTTTCATCTAATGTACCAAAACATAAGTTCGATTCCATGTGTTTAGGTGAGCAATTTTGAAATCCAGGCGATAGAGAAAGTCCCGTAGTTCTTAATTTGTGTAGTATTTTATGTTCCAGTTTAGGGTAACAGTATTTTGTGCGTGTTGCTCAT
Gma.2061.1.S1_s_at	AW348425	At5g41670	1e-88	Metabolism			GCTGGGATTAGTACTCCCGGAATGTGTGCCAGTCTTGCTTACTTTGATACCTATCGGAGGGCAAGGCTGCCGGCAAACCTTGTCCAGGCTCAGAGGGACTTGTTTGGGGCGCATACTTACGAGAGGGTTGATCGCCCTGG
GmaAffx.41858.1.S1_at	BM523248	At4g29120	1e-130	Metabolism	Amino Acid Biosynthesis/Metabolism		GGGTTGTACCTGGACGCCATTTCCACCGGCGCGGCCGGTTCCAAGTCGCTTGATTTGTACGGAAAGAGAATCTTGAATAGGGATTTGGAACCGGGGTTCTTCGTGAACCACTTCGTTAAGGATTTGGGGATTTGCTTGAAGGAGTGTCAGAATATGGGGATTGCTTTGCCTGGCTTGGCTCTCGCTCAACAGCTTTATGTGTCGCTTAGGGCTCACGGTGAAGGTAATTTGGGCACTCAGGCTCTTATTTTGGTCCTTGAGCGACTCAACAATGTTACTCTTCCTCCCTCCTCCAATACCTGAAATTTTTAAACATGCATTGTATTGTATCTATAGTCTACTTTGCAGANNGAATGCTATCGCATAATAACTATTTGGCTGTTTATGGAATGGAACTTG…
GmaAffx.41858.2.S1_at	BG155359	At4g29120	2e-07	Metabolism	Amino Acid Biosynthesis/Metabolism		GTATTGTATCCATCATCGTCTACTTTACTTTACTTCCCTGCCATTGCTATGCAGTCTACAGAATCGTATCGCATAATAAAAACTTTCAATCCCGAAGCTGATTATTGCAATGAGCAGTGTCTTTTTTATATTATTGGTGATGTAATCTAGACACCTAATATTATGAATGGAGAACTTGTTCAGTGAACGAACGCCCAATTTCTAAATGGGAAAAATTATGGAAATTTTGTTTAAAAGCTTTCGAGTTTTTTCATTTATGTTAAGCCTGAGGCTATTCAAAATGCT
Gma.5590.1.S1_at	BE822176	At1g22410	1e-130	Metabolism			ACGAGGATGGGAGCTGAAAATATGAGGGTGAAGCTTCCACATCTCATCAGGGCAGTGCGCAGAGCAGGNCAAATTGTCACNTGGGTCAGTGATCCTATGCATGGAAACACCATTAAGGCTCCNTGTGGTCTTAAAACTCGCCCCTTCGATTNCATCAGGGCNGAAGTGAGAGCATTCTTNGANGTNCACGAGCAAGAAGGAAGCCACCCAGGAGGGGTTCATCTAGAGATGACGGGTCAGAATGTGACCGAGTGCATTGGTGGGTCAAGGACGGTCACATTTGATGACTTGAGCTCACGTTACCACACACACTGTGACCCAAGGCTCAATGCTTCACAATCTCTTGAGCTTGCTTTCATCATCGCNGAGCGTTTGAGAAAGAGCAGGATCAGATCGCAG…
Gma.2354.2.S1_at	CA819143	At1g74040	0	Metabolism			GTTGTTTCCAGTGTCAAGGCCTATATTGCTGCACTAAACAAGATGTNGGGTTTCAAGGAANCNTCTCNATCTGCTGAAAAAATTNCANTTTCTTCATTGAAGATTTGAGAATTNTGTGNTGCTNCTTTGGTAACANTTGTTTGTGTTNAACCACNAAGAGGAAGACAANGTTGCAGCAGCATTCTTGGCTCTCGCAGGTCTCCATATTTAAGGTGTCGTCCCTGTGTTTTGACCGGAATGTATTTGCAGTCAGGAATTTATTGATTCACCCAAGTAGCCTTAGCAAAGAATGTAACGTAAGTCCATTTTGAATATTCAGACTACAGGGATTCTTTCCCTTTTNATTTTATAGGGTGCCCTTTATTTGAAATTATNAAATGTCCTTNAAGATTAGAGTGT…
Gma.3920.1.S1_at	CD396826	At5g17920	0	Metabolism			TACTCCAACTTCAATGACATCATTCACTCAATCATAGACATGGATGCTGATGTGATCACCATTGAGAACTCNAGATCAGANGAGAAGTTACTTTCNGTCTTCCGNGAGGGAGTGAAATATGGTGCNGGCATTGGNCCTGGCNTTTATGATATTCACTCACCCAGGATTCCNCCNACNGAAGAAATTGCTGACAGGATCAACAAGATGCTTGCNGTTCTTGAAAGCANCATTCTCTGGGTCAACCCAGATTGTGGCCTTAAGACACGCAAATACACTGAGGTNAAACCTGCCCTCACNAATATGGTTGCTGCTGCCAAACTTATTCGCAACCAGTTANNGCTAGTNCCAAGTGAGNTGAGAATGAGCCAATAANGTCATCCATGTGAGATAATGTACTCA…
Gma.7192.1.S1_at	BU765896	At5g65940	1e-112	Metabolism			GACACTACAGCAAGGATTTCTTCGAGGGTTGTAGGGCTATACTGATAGATAAAGACAGAAACCCAAAGTGGGAACCTTCCAAATTGGAGCTTCTTAGTGATAGCGATGTTAATCGTTACTTCTCTAAACTTGATGATAAAGGATGGAAAGATTTGGAGCTTCCTAAAAGGTTTAATAATCTGCCTACATATGCTATTTCAAAGCTGTAAAGCATCATCATTCTCATATTTTCAAGCCCAAAGTATGGAAGACACGTATTGCTCCATTCAATTGATTCTTGGATGTTTCAATGTATGGCAGTTTATGAATTGCTACCGTTACAATTGATAAGATTTTAAAACTAGTGAAGTCTACCGTTGAGAATCAGAGTATGATACTCTAATAAATGTAGTTTCCAGG…
Gma.3107.1.S1_at	BE658900	At5g62790	1e-104	Metabolism	Isopentenyl Diphosphate Biosynthesis		AAGTTGTGGAGCTAACATGTGAGAAGCATCAAAATGAATTGNTATCCTCTCCTTCCCTTGAGGAAATNATTCACTATGACCTGTGGGCGCGANAATNTGCTGCTAGTNTGCAAGACTCTTCCAGCTTCACTCCTATTCTTGCATGAGGATGATTAAACTAGGGATGTGGCTGATGCTTCCCAATTGCCTGCTTTCACCATAATTTCTTCNGGCANTTGAACAATNTAGAATGNTGCATTCCACAGATGTTGAAAATTAAATAGGTTTTTTGTTTATGGAATGTTGGTGTTTTAACACCTTTCAATTGATCTTATAGTTTTGTCGTAANNNNANNNAAAACNATGTCTTTTTAATAGTCAATAGGAGCCTAGGAGGTTGGTTGGTTGCCTATGAATGT
Gma.7728.1.S1_at	BI942310	At4g15560	1e-105	Metabolism			TCCTGAGCTTATCTGGTATCCTAGATGGGCCTCTAAAGTGGAGAGCAATGATGCTTCCTGATAGGTACATTGAGCATGGATCACCCCAAGTTCAGATAGAAGAAGCAGGGCTTTCATCAAAGCAGATTGCAGCCACAGTCTTGTCTCTTATGGAAAGGCCAAAACAAGCTCTTCTGTTCAAATAAAAATGCTAAATGGAATAAAGATCTTCTTGACCTGGGACCTTGAAGATATATCGAATTCTTAGAAGACTTTTTATGTTGACATTGAGAATTAGAGGAAGCTGTAAATAACTGCACTAGCATTGTTGTTCATATCTTGATGCTCACAT
Gma.2294.1.S1_at	BI425775	At1g09780	1e-159	Metabolism			CCAGCGACTATGAGACAACTCTCGTAGAAGTGGTTGATAACTAGGAACCAATAGATGAATTTTTATAATTTGAAAAACAAACAGGGAAAGCTGTAGATTGCAGCCCTCAAAATAATTGAAAGTTTTCATCCTTATTCCACATGTGTGGTGGTTTTGTTCTTATGAGTTACCAATACCAGTCTGCAGTTGACAGAAAAGTATACCTAATTAATGGCATTTTGGCACTCTCTTTTAACT
Gma.2119.1.S1_at	BU081878	At5g03650	1e-102	Metabolism			GTACATGTGCCTTGCTAGGTAATAAGTTGTGATANCACACCCATCTTCCTNTTTTTACTTTTTAGGATTTANCGTCTTGACATGTNATAAGTTGCGNCNCGATTGANAAATGTGAATCAACAAAGCTATGGTCCGCGAACCTGAGACTCAATGTACCTATGCACNTATCAATCTTCATNAAGTGCNTACTCTGTTNAAGAGTTGGAAGNNNNNNNNNNGNTTTTACCGTGGGAAATTTTGCAGGAGGCTTTTANANATGTTTCCTTTAGATTNNATTTTTATTTATTGNTTAANCTGTTTCCTTTATATTTNAAAGTTGAGTTGTAGCANNANTCANAGTATTCTATGCAGTGTAATAAAGAC
Gma.1.1.S1_at	U36442.1		0	No Homology to Known Proteins			TTCCTAACAGCATCTCCATCTAAAGAGGTTTATGGTTGTGTTGCAATTTAAATAAAAGATGAGGTGTAATTCCTTCATTCCCGTGTATAGTTATTATGTATGTTTGGATGCTTTGATGTTTTGCTTTAATAAATTTTCTCTGTTTCTACTTTGTACCATGCTAGATTTACAATATGA
Gma.10015.1.S1_at	BI469759		0	No Homology to Known Proteins			GACTTTGGGAGTTGAGTGTTTTCACTCTGCTCGGTGTGGGATCATAACTGCGTGACGACCACGTGGGGATGAATACTTCAGTCGTGAATGAAGAAACAGTTGATGTTGGTTAAGGCCCACGGAGGATTCGAGTTCAAGATGGATTCAATGTGTCCCCTAACAACATATTCTATGTTTCATTTTTGTTTTGTTATTTTTTATTCTTTTGCGGGGAAGCGTAAGTTTAGATTTTTATATTCTGTCTTTCACAGGAGAAATTTTGATGTAGTAGTATATACTTTTACGATATCAAGCGTGGCNAATTCCATTTAGCCAGCGAACATAATATTTCTAGCATCTGCAGGTAAT
Gma.10377.1.A1_s_at	CD409364		0	No Homology to Known Proteins			GAAAAATCTGCTGTTTATCTTCATTTCCTTTTGGATTTTGGGCTTGTATAATCTTTGTTGCACTTTTGGTTTGTTTGCTTTTGGGAAGTGGTTTGAATCCATTGCAATCATACAGAAGCTATGCTGCGCTACAACTGTTGTATCATGTGTGAACCTGTTGTCCCTGTAGGA
Gma.10485.1.S1_at	CD412379		0	No Homology to Known Proteins			TAGAATCTTTAGTTGCAATGCACCAACATGCACAAATGAGGGCCTTTTTAGGATTGTGTTGCTCCCTTTAATGCGAGGGAGAGAANNNNTNNNNANNNNNAGAAAACGGAAAGTTGGCACAAGTTACAATATGCTTGCTCTGGATGAAGGGTAGTTGTTCAATTAAGGGTGTTTTGCCAAAGGGTTTGAACTTTGATATGGTTGTCGTAGGTTATGGCGACAGTGGCACGTTTGAAGATATACTCAACAGTGTTGATTGAATTTGAATTAAGCCGTTGGATCATGGATGCTTTGGTTCGTAGCTGTTGGCATAAATCAGGAAACTTTGATGATGTTGTAGTTTTCTTCAACTGTCGATTTATTGTAACGAGGTGGATTTCCACGTACGCCCCATTGTTT…
Gma.10706.2.S1_at	BI968467		0	No Homology to Known Proteins			ACTCCCTAAGTTGCCTCCACTCAAGCCACTTCCACC
Gma.10888.2.A1_s_at	AI748644		0	No Homology to Known Proteins			ATGTGCACGTGGGAATTTGAATTTGGAGTGCACGATGAGCCACATTCAAAGGGATAGAATAATGGTTCTTTTTCTTATATGTTGATTTGGAGTGGGGTAGTGTAATTTGTTGGGGCGCCACTAGTTGGAATAGGGCCCCCGAGTGTTAGAGTTCGTGTTTGTTTTAGCTTAGCAATTTGGC
Gma.11056.1.A1_at	CD402900		0	No Homology to Known Proteins			GAATAAGAGACATAAATCCAAAGGAGATTTAATTTCCAACTAATTGTCAACACAAAGATTGTAAACTTTCACAAGTGAAGAATCTGTATCCATATTGAGGATGTAAGATATTCATAGAGATTAGACAATTGGTTCTTTTGTAACAATTTAGAATTTTTTTTTGGCTTTGTATCATGTTATCAATATATTGCAGTCAAGAGAAATGGAGGCCGGGAATTTCTTAAGAGGATGCACTTTTTGGTCTTTGATGTCTTAGTAGATCTTTTATTTGACTGTAATT
Gma.11082.1.S1_at	BQ612677		0	No Homology to Known Proteins			TTATTTATCTACTTGCTAATCCTGTATTCAGCTTTGGAATAGAGTTGCAAAAAAATGATTTTAATAAAATTAAGAGAGAAGCTATGTTAAAAAAGCATACTTTTCATGGATAAAATATGGAAATTAATTTTGAACCGTAGATCTAATTGGCCTTAATATAA
Gma.11298.2.S1_at	CD415329		0	No Homology to Known Proteins			ACCTCGATTACCATATCCTGCATTTTTCTTGACAAGTGTACATTAAATTACACATGTCAATATGGTTTTATGTTGTTACCCCATTGCCACATTGTGTGTTTTGTTGTTGGTCAACCTTAGCTGCTCGACTTGCTNCAACNTGAAACAAGCAATGCAATTGNAGGAGCAGGTGCAGAAGTGTCATCCATTGTTTTCTTCCCTTNTCAATTNTTTTCCTTTTTCGTTCTTTGGTCCTTCCCAGCTCATCTCATCTCATCAACCTTTGTCCNCCCCCCACCANTTCATATGCATATTTTTCCAAATGTCAAATCATGTCTCCTTACATATTGTTCAGTCTTTTTCAGTTTTATAGGATTTGAATTGAATGAGCCCAAATATATATATATATATATATATATA…
Gma.11311.2.S1_at	AW101694		0	No Homology to Known Proteins			CACCAGGAAATGCTCTTTTAAAAATTTTGGGTGCATTGATGTGCCAAGCATTGATAGTTGTTGGACTTGTAGAAAAATAAATCAATTGCAAGCAATACTCATTTTCAACATGGTCAACAGGTAAACAATCGTAGGTTTTTCATTTTGAAAGTTGGTCCTTGAAATAAAATGATGTATGCCNNNNNNCCGAAATATGAATTTTTAAATTAACCAGAGGTGGAATTATGAGTTTAGGCAGTGGATTGCATGTTGAACTATGGTGAAGCAGGGTTTAGAAGCTTGTGGAGCTGCTGAGAAAAGAGACACAGGCTGTTACATAGATGGCGAAGTCCACCAAGGGTGCTGAAGTGAAATTTGCGCTCAATTTGTGCCTTCTTAACACTGCAATTGGTGTAATAA…
Gma.11768.1.S1_at	BG508925		0	No Homology to Known Proteins			GACTGTGCAACTTATATACTATGAACATGGCAAGCTGTACCCAATTTATGCTATTACTGAGCATTTCCTCCCTCGTTTTTTTTTGTTGTATCATGGATGCACAATCATCAATAGAGAGTAGCTTTAACAGNAANNTATTAGACGTGGTTTACTATAGGCAGTCATAT
Gma.12193.1.A1_at	CD412873		0	No Homology to Known Proteins			GAGCTAACCTTCAGCTTTTCTTTGAGTGGCTGTGTGGTTGTATAGGTANNNGCTTTATATCCCCCCTTTCTCCTTTTTGCAGTTGATATTTGTAATACGCAGATAGTGTGATTGTGTCCTCTCATCTCAGGTTTGTTAATATCTTTGTAA
Gma.12351.1.S1_s_at	BG651436		0	No Homology to Known Proteins			GGCGGTGTTGGTGCAGGGTCGGAATTTGGCAGCAGTGGCCAATTAGATAGCAAAACAAGCAGCAATGGAGATGAGGGTTTTGGGGATTACAGGGATGACAACGATGCAGATAATTTTGCCAAGAGGGCTTGATGGAATTTTATAGTTTTTTGTTTTCTGCTGCTCGTGTTCTGTATCCTACCTAAATCTCTTTGGACTTCAACCTGATAAGCATTTCATGCATGTTA
Gma.12505.1.S1_s_at	CD394519		0	No Homology to Known Proteins			ATGGTCGTGCTGTGGTTGTGGTTATGGCAATGGCAATGACAACTACAGAAAATTGCAGTGAGGTCCATTTTTTTANAAATCTTGGTGATGTTGATGTTGGTTACTTTTCCTAATTCTTACTACTGCTACTTGATATTCATTCATCTGCTACCACACCACTATACTCTTTGCTTTGCAGTTGCGTATGATCATGAT
Gma.12591.1.A1_at	CD391918		0	No Homology to Known Proteins			CTACCTGTTCACCTTGTTTGTTAATGTATTTGTTGATGTATATTATAAGTAGGAAGCATACACATAGTACAGTGGTAGGTAGAAACGTGCTTCAATTTATTGAGTTGATCCTCTAAGTTTTGGTTTTGTCTTATTATTTTAAAGGCTAGCAGTGATTGTACGAATATAC
Gma.12624.1.S1_at	CD400674		0	No Homology to Known Proteins			GCTTGTTCAGGACAATCAATTCATTGANATGGTCTATAGAGCNCTGCTGAATGCTCATCAATCATGACTTNCACGAGGTGTTTAATTATCATCTCGCTGGATGAATTGTTTTTTGGGCTGAATTACNTTTGCTATNCTTTTTAGGCCAGGCTATATNNTATGTCCTAAACTTTGAAATGTTTCAGTCNTATTNAATTTGTAAAATTGGTTGTGCNNNNNNNNNANNANTTTGATCTAGCTAGTTTCCTATGTCACTGTTTTTAGACAAGTCATCGCAATTTAACTGCCATATTAACTGTATTAGTTAGGTGACATGGCAGGAAATGGTGAGGTCCAGATGAATGGTTGTTAGCAATTCGGAACTGATTTTACAAATTATGTTGATCGACTGAAACAAAT…
Gma.12826.1.A1_at	CD391629		0	No Homology to Known Proteins			CATGTCTGGTGGCTTTAACTTGGTGCCTTCATTGAATCCGGATCTACTTCTGTAGCATATATAATTATACACGTTCATTTGTCAAGTATTAGACTGAATCAGTTCATAGTTTTCAAGTGTAGTCAAGGATGAGATCTGCTGCAAACTTCTTATTGTTCATTACTGCTCCTTGCAAGAACAGATGTTCTTTCCTGTGACATTCATTTGCTGAAACTTTATTCTGCTATTCTTGTTGCCATTTTTTTAAAAGTAGTTACTGTTATTTAGTTCTCAAATTCTCATGTATCACAAAACTATAGTTTATTTGTTCCACTAGCAGAAATTCCAGCTGCATTTGTTGTTATGTGTGGGGAGAATAGTCACATGCTTGTGACAAGTATGTTACGGATATTTTGTACC…
Gma.12956.1.A1_at	BG881842		0	No Homology to Known Proteins			GGAACTTATCGGAAGCAAATCCAGTCAACCGAAGTTGATATGCCGAGAGCATTTCTTCGCCAATCCCATGAGTACTTCCTTGTTGTAGGGAATCTGTGGNATTGACATTAGACATTAGTACTTGTTATATNAAAAACATATTTATAGGNAATTTTGGATACTGGTTTAAGTTATATTTGGAAGAANTGTAACTTAGGCAATCCTAGTAAATATGTTTCAGGCTAGGAACTTAGGATTTTGGATATTTGACAAGTTTGGTTGCTACAATCCTACTTGAGTATAGNCAGGTTGGTAAACACATCATTCAGANNTTTTTTCTTANNNANNANNNNNTCCTAANNNNNNNANNNCGGGTTTTTTTGTGGTAGTTTCGTAATCAATTTAT
Gma.13100.2.A1_at	CD401239		0	No Homology to Known Proteins			TAGTAGTAGACATCACCCTCAGCCCACTAGATGGAGATAACTGAAAAGCAATGTGCCATATTATTTTTCTTCCTGGTAGTTTGCCAATATATATTTTTACTTGAATGATGAAAGAAGCAATTAGTTTTCCCCCCATATTTGCATAATGTCCCCAGTTGT
Gma.13109.1.S1_at	CD395840		0	No Homology to Known Proteins			GAGTCCCTGGTGATGTTAATCCAAAGAAAGAGCAGTGTGTTGATGGATTGGCTTCTGACTATATCAGTAAGATACGTAACAAGCTCGGGCGTGGTGTATAAGGANAAATNATTACATGNTTCAGGACCATGTGGTCCTGGACATTCTCTGCGTGACATGTAACTACATATTTTAATTCACGAAAATAATATGTCACATGGAGATTGACTGAGACCAACATAGTCTTGGACCATATAATAATTTCTTGTGTATAAGAAGAGACTTGAAATTAAAAGTCTTGGCTTATGTGCTCCTAGTAAAACTATTGTCTTNNNNNANNNANNNNNNNCATGTATTATAGTACTACTTACATAAGCAGCCATTTTGGTTTGCATTAACCAGCTGTAATAAACTTAGTAG…
Gma.13244.1.S1_at	CD395627		0	No Homology to Known Proteins			GGCCTGGATTTGTTCTTCGCTGGGCTTTAAAATGTTGTTGGGNANNNGNGTTTTGTTTAATGGTTATGTATATTATCTTCTGCTCGGTAATGCNNAGACTTACTCNNAGTTTCTTCTATTATTCTAATTTCTACTAATAATTGCATCCTAGTTAGTGTGAATNTGAAGTAAATTTAGTGAATGACNAATGGTTATATGAATTTCGTGTGTTGAATACTTTCTATTTGGATTNTCGTTGTATGTGATAATTCGGCTACTGTGGATTAAGTTGAAGTTCAAGCTAAGCGTTCTTGGCCA
Gma.13269.2.A1_at	CD393205		0	No Homology to Known Proteins			TTGGACTTGGGAGGACATTGATTCCTTGGTCTCAACTGATCTAAATGTTCCTTGGGATGATTCTGATATCATACCCTGACCAAAAA
Gma.13337.1.S1_at	CD412716		0	No Homology to Known Proteins			TGGTTTTGGTGATTGCCATGTTGGCGATGGTAGCAACTGGGGTTTCAGCTGCTGAGGCACCTGCCCCAGGTCCTTCATCCGATGCCACCNCCTTCTTTGTACCCACTGCTCTTGCTTCTCTCTTTGTTCTTGCATTTGGCCTTCTCTTCTAATTAATTCTTCAACAACCTTTGGTTATTTGTTACATTACATATATGGAATTCACTTTGTTCAGAGGTGGTTGTGTTTTGTGTTTCGTTCTTCTCTTTTTTTCCAACTCAGCTTG
Gma.13373.1.A1_at	CD398686		0	No Homology to Known Proteins			GTGTTTTTGACGGACGAGTTGCAACAATATTCTGATTTGCTGGTAGTCATATGCATCGGGGCCATTATCGTGGAAGTTTTGCTGCCTTGTATCGCTATCCATGCAAAGTGAGGGGTTTTTCTGAGAAGCNATTAGTCCGGTTGAATTATATTGACANCNGTGAGTATNTTATTTGGGGGCACCCAAGTTGTTAAGGAACATAAATAGCAAGATTTTCTCACCTTTGGATCTTTTAGTAGTTTGCTTCGACGATCAACTCCCTTTTGCCCCAGATCTGTTGAGACATTTGTTTCATCATCTGTGCCTCTGGTTGCTGTCTTTCAGTGAAA
Gma.13378.1.A1_at	CD395558		0	No Homology to Known Proteins			TAGATGCGTATGTAACTTTATATAGAGATGAACNACCCCATTGTTTTTTTTTTTTGGTTAGTTGTTGCCTCTTTACCAATCAGTCGGTCTTATTTTCATTCTTTTTGTAGTGGTAAACTTGGTTTTTTTTTAGCTGCCTTCCACCCTACATGCCCAAAGTGAGTAAAATCTGCTCCATAGTGCCACAATGTATGCCTTTCTCTTTTCTTTTTGTTAGGGGAGGACCATGTTTCTTCCGGCAAATGTAT
Gma.13408.1.S1_x_at	BI699402		0	No Homology to Known Proteins			TCTCTCTATTATTTTTCACCCTTTTTCTCTCTTTTGCAAAGAANNCAATTTAATTANGTCNATTTGTACCAAAATGGCTTCTCAAGTTTGTGANACTTTGNCTTTCATCAACGGTGATGATGGGTTGAAAATCAACGGTGCTCTTCTAATGTCNNCNTNGATGGAAGAGCCATCACCAAGTGATGAGAGTGATGATGATCGATTGGATAGCTTGATTAGGTCCTTTGAGGCTGAAATTAGTGGAAGCAAGATGGGGGATCATCATGATTCATCATCCATAGGGTCAGAAATAT
Gma.13428.1.A1_at	CD397879		0	No Homology to Known Proteins			GGATAATTTCATAATGTCTCCCTTTTTTGTTCGATATGTATGAAACCCTGTTGGGCATGCTAAATGCCCTGTTCTCTTTGGGCTCTCTGTTGCAAACCATCTGACACAGACTTGGGTGTATTTCTGGCCAACTCACAGGCTATAACCTTTGTCACTCTGGCACACTGTTGTATGGTCTGTATTATGTTCACGTCAAAGAGATCTTTTATATTACTGACTCTTGTTTGGCTTAAA
Gma.13589.1.S1_at	CD401233		0	No Homology to Known Proteins			TGGCACGATCCTTGTGCATGCATTGCTAATCTCCCATTTTAGTTTCATAAGCAATGCTTCTAATTCTCAAGTCTCCCATGGCTCATTCTTGGATTCCCCTCACAAGCTCATCAAGACAATTAAAAGAGGCAGGCTGTTGCTGTATCCACCGCCTCCTAAACTCAATGTATCTCCTTATTGTCGTCAGGCACGACCACGAACACCACCATCACCACTAACACCGCCGCCATCANNNCCNCNNNNNCCACCAAATTAAATCCAACAGCAGCATAAGCAAGTTAAGATCGTGGAAGTTTCCTTGTAATTAGGATCTAGTAGTTCAACTTGTAATAGGATTAATTAGTTTCAATAGTGNTTCAATAATTAGTTGGTTGTTCTTTTTCTATTTTTGAACTTAGT…
Gma.13658.1.A1_s_at	CD402501		0	No Homology to Known Proteins			GGAAGCTGCATCATGTTGGTTGGTCATGCCTATGATAGCTTTTGTTGATTGCCTGTACTTATGGTTCTTTTGAAGCAGTTGATAGGACCTTGATCTTTCAGGATATATAATTGTTCATTAGGGCTGTATATTACTTTGGATTAACATTATTTATTATTAAGGGGGACCAGAAAGTTGAGAGTAAAAACCAGGTATGTGCTCTCAATGATTGTATGTACTTTACCCTCTTCGCTAGTAAATTCAGTGGTTAAACATTCGGTTGAC
Gma.13690.1.S1_at	CD403358		0	No Homology to Known Proteins			GCCAGGTCACATTAATGTTGTCGCTGCCGGTCTCATTCTTCTATNGTCTGTGTTAGTTGGTTTTCTGCTATTCGCCCTCAAGGGTTGAGGGTTTTGTACTGGGAATTTCTCACCTCCAGGGACACACATTCGCTTAGTTTACAACATTTT
Gma.13987.1.A1_at	BU547323		0	No Homology to Known Proteins			GTTAGACGATCACTCGTGCTGTTTTTTAGCAGGAACTTGTTGGTTTGGCGGAGATGTATNNNTTTACCTCCTGGGAACCAGATTATTTCAGGTTAACATTCTTGATGCTTGATCANNNTATAGAAATGCATNNGGGGCAAGGCTTGCTGCTCAAGGTGTGGCATTATTGGCTTAGGAATTGTCAGTGTCAGCTGAAACTTTGTAACATATCCATNGGCATATTGTATAAACANATTTNATCTGGTTTTGAGTATTAAAGCACTATGGATTTTCTAGCAGCTATTTTCTTTCTTTTTTAATATTCACCTTGTGCTTGCAAGAGACGGTTGGTGTGAAGTGGAAGAGGACCTTCTGNGCATCTTACCAAAGAAATTGAGTGACATTATGCATTGAAAGGTA…
Gma.14018.1.A1_at	CD413603		0	No Homology to Known Proteins			AAGCCTGGAAACCTATACCCTGGTGAGCAACCTCTCTCTCTGGAAAGATTGGACAGTTATTTAGACAAAGTTCAGTTTCACCCTATTTAGGATAAGCAACCTACTATTTTGTTTTTTCTCCCCCTTTCCTCCAACCTGATAACTGTAAATTAATTCCTTTATTCTTTTTTCAAGTCTTAATTTGTGAATAGCAAATTTTAATGTATTATGAAATACCCGAATAATTCCTACAATCCATTTTCTTGTTTAGCCTTGCTTGTTGGGGAGGGCTTGTACAAGGATGATCAATCA
Gma.14036.1.A1_at	CD414107		0	No Homology to Known Proteins			AAACCAATTGGTTGAAGACGCCACTTTCTTAATGTGGACTTGGCTTCATAATTTGGAGAAGGATTTTACTATTCATTTCAATCAATGGTCCAGTAACTTCAAACATCATTTTTTGCAGTAGTAGGGGTGTTTTTGGGATCATATCACTTGTATTTTCTTCCCATATTTTGGTTCCTAATCAGACTTATGTTGCCTGATTGAGGAACCATATTTATGGTGTCTAACTCTGTATTTAGTACCTCTGG
Gma.14044.1.A1_at	CD414064		0	No Homology to Known Proteins			GTCGTCATCTTCCATACAGTTTATTTTTATATGGTCAGATGAATAATCAAGGGCTAAATTCAATTAGATGCTGAAATTATGTAACACTAGTACAAAATTTGATAGCATGAACGCACTACTAGCTGACCATTAAATTGAGACCCACATTAGTCATTACCCTTCACTTTTGCATTACTCTCTTGATCTCTCATTTAAGAGCGTTCTTGTCTACTGTCTTAGGATAGTGTTTTCTTTTTTAAAACAGTTATTTGATACTATCTCCTTGATACGCACCATGGGTCAAGTAGTTGAT
Gma.14045.1.A1_at	CD414142		0	No Homology to Known Proteins			AAATACTTGGACCACACGCACATGGCACATCCCAACAAAGATGTGTTAACCCATATGCATGTGATGATGTTGAAAAGTTGANCAGAAGTTCTATTGGCAGCGTTTGAAATATGTATTAAATGCAGCGTATTGTAGAAAGANAAGGCTGAAATATGACGGCACAGTTCAGTGTATAAAAGTAGGTTTCTTGTGCGGTCTTAAAAGAGGAGTTATTGACATCTGAATTGAAAGGTGGCTTTT
Gma.14088.1.A1_at	CD415327		0	No Homology to Known Proteins			ATGTGTCACAGTTCCTAGTAACTTCAACTCATGATCCATGACAACCAAGATTGAAAGAGATTTGAACTGGTTCCTCTAGGATTAAGGATTCCAGTTTTTATATATGTTCGTTTCATTAACAATAAATAAGAAGGCAAAAACAAAATAATTGTATTAATTAACTTGGTCCATTCAGCTAGTGCGCTTGTGGATATATTGACCACGCAAATTAAAATCATAGTTGCCAAGTGAATGCCCTGTTACATGCTTTCTTTTCGTGGGAACTGGTTTGTGCCACTTGGTTATGTTTATGAAT
Gma.14197.1.A1_at	CD417305		0	No Homology to Known Proteins			GGAAGTAGCTCTTGATATGATATCTTTTGGTAGTAAGCAAGAACTGCACTTATCAGGGCAAAAGTATATGATGGGGGCCTTTCTGGATTGTGTTGCCCCCTTTAATTGCCAGGGAAAGAAACTGTGATTTACTGTGTTAGAAAACGGAAGGTGGTACAAGTTACAATACGCTTGCTCTGGATGAAGGGTAGTTGTTGAATTAAGGTTGTTTGCAACAAAAGGGTTTGAACTTTGGTATGGTTGTCGTAGGTTTTGGCGACAGTGACACGTTTGAAGATAGTATCATCTTGTTTCGGCTCCTTTGGTCTCCACAGTTTTGATTAAATTTAAATTACGGCATTGGATGCTTTGGTTCGTAGTTGTTGGCATAATTCAGGAAACTTTGATGAGGTAGTAGTT…
Gma.14304.1.S1_at	CA852438		0	No Homology to Known Proteins			AAATATACTTCTCTTGTCGGCGGCAATAGACAACAAAGGTAAAAGCCGGCGAAGAGCATATTTCCAAGTTTGAGGATTGTTGAAATGGGGTCATAAGTCATTTGTCTTGGTGAGAGTTTGTACTGTTGTCTTAAACCAGTCTTATATCATTTTATCATCTTAATTGAAGTAATGAACCCACAATATGGAGGGATCGTTACTTCAACTAGTCCCATGTTCTTTAAATGCATTTC
Gma.14379.1.A1_at	CD412090		0	No Homology to Known Proteins			TAATCTTAATAGTCTCATTGTGGTTTTATTTGTAGTATTCCTTTGGTAGGCATATTGGTAGCATGTTGGAAAGTGATTTTACTCGGGTAGTTATTTCACGTGTTCCAATTGTTGAGTTCCCCTGCTGATTGGAACGAGTATATGTCTGTTGATTAATTACGGATCATTGAGTAGAGCACATTTCAAAAGCCTATTGTCTATGTTNATCATCAAGGGAATACATGGTTTTA
Gma.14554.1.S1_at	CD414006		0	No Homology to Known Proteins			GAGAATCTACCATCAACCATGTCTGATATTGCTATGTTGGTAGCAGAAGAATATGAGAGGAGGACAATGAATTTTAAGAAGGCTGGCGCTGTACAAGAGAGGAACTTGAACGTGGTTTCTTGTGCTTCTTTGTTGGTTCTGAAGGAGAAGATTGAGGTGCAGAAGAAGGAGCTTGTCAAGTGGGTTTTGGAACCCAAAACCCAATTTGCAATTGCTGCTTCTAACAGTTTCTTTTCTGCTTGAACAACTTCAGCTTGCTGGTTGCAATAGTTGGCTGTTGTTGGCACCTTGTTGTTTTATTATTTTTTCCTTTTGTAATCTATGTTTCTCTGTGTTACTGTGCATAGTTATGTTTTGAATTAAAGGCAAATGTGTTCCCCGTTTAACATCTCCGGTGCC…
Gma.15101.1.A1_at	CD404204		0	No Homology to Known Proteins			GGTGATCCAACACCATGTGATCCCCGGCCTCACTGTCTTGCACATACCGAATTGTTTTGAGAAGTGCCCAAAGGTAACTGGAAAAATTTCTTAGGAAGACAAAGAAGCTGATTCAGTTAAGATTTGCTTTGTCTGGGGCTGGACGGAACTGCTGAGCTTGTCTTGTTGGATAATATGCTTTTNCTATTGTACCNTTTTTTTTTAAGTATTTAAAACAATCATAGNTTCTCCTGAAGNATAAAAAGTTNTGGTATCCTTGATANAGGCTAGAGAGGGAGGGATAAGGTTTGGTTTAGATTTTGTCTCTGGAAGCTAACTGTCACTTATGACTGTTTTTGCATTGGAAATTTTTCTGCAGTCACACATTAAATGTTACTTGATGAATGGTTCAGCGGTTAT
Gma.1526.1.S1_s_at	BE822523		0	No Homology to Known Proteins			ACATGATGAAGCGTAGGTGGATGCGGGAAAAGAAAATTGTTTTGCATAGTTGTTGGGTTTAGAATTTCATAGGATGGTTCCCTACCCACATCCTTTTCTGATAATTAGTTTCTGAATTTTTATTTTGTCCTCCCTCAGTAGGTTTAGATTAGTGCACAATNGTAATTAGGGTTTAATATCATGATCCTGTACTTAAAGTCAAT
Gma.15513.3.S1_x_at	AW598013		0	No Homology to Known Proteins			GTAACAGTTTAGGATGTCCCTGCAATTGCCATTTGTAGTTATCTGTTAATTCTGTTTGCCTTTCGGGTCTTCAACCCATTTGTTTATTACAAT
Gma.15769.1.A1_s_at	BG045620		0	No Homology to Known Proteins			CAAAATGGAGTTGCACTTTTAGTTGATGGGAAATATTTGGGAGGCATGTTGGAGGTTCTAATTTTATTTTAAAAAATTTGTCAAGTGCATATGTTTTTTGCCCCCACCTATGTATGGTCCCAAATTTTGTAACTGCACGTGTAATCATATTCAAGTACTTCAGATGTTACCCTTCACAGGTTACCATTAAAATGCAAGGTTAAAGTGTACTGTGATCAAACTGGGTCGAGTATTTGCAGAAATA
Gma.15870.1.A1_at	CD417955		0	No Homology to Known Proteins			GGAGTGTCATCAGAACTTGCTTGCTACATTTGATGTGATTTAAATAATGGAATCAAATCACATAGTGGCATTTGCTTAGTTCTGTTGTTAGGTCACCAAAGTGGCATGCTACTTGCCATTGTCCAATGTTTTGGAAAAATGGATGTCGGTGTAAGTGTAATGTCCATTCTCTGCTCTCTTT
Gma.1670.1.A1_at	BI893962		0	No Homology to Known Proteins			TCAACCTCATTTAGGCTCTCACTCATGCTTGACTGACAGCTGACAATTAACTTACAAAGACAACTCTGATGGTCAGATGAGTGTCACACGATGGTTTTGACTCAACAGTTGCACTCTTTGGTTGGTACTAGGTGTTAGTTGGCAAATCTGTTTGTTAGGTTTTCCACGTGTCATTTCTCCAGATGTATCTGTAGTATTGTTTANTCATTGTTGTATCAATTAGATNANAGGATATATGTTGTGCCATTTTCTCCCTTATTTATATTCTATATGGATATGTATGTTATAAATGTGATTGTATGTGAGTGTTTCTGAACTGTAACCTTTACT
Gma.16828.1.A1_x_at	AF047051.1		0	No Homology to Known Proteins			AGCAGTAACAACATTGTTTTGAGCTAATAACATAAGACGAACATAAACTACTTGAATCCAACAAAATGTATCAAACATCAAAAAGGAGAAACCAGTGCCACTAACAACTGGGTGTCCCATTCGACAACATAAGCAATTGTAAAAGCAACAGAAACAAACTAGGTTTAACGCACTACTTGGATCTCTGTC
Gma.16919.1.S1_s_at	BI967467		0	No Homology to Known Proteins			ATTTTATCTGTTAGTAATTTGCTACTACTATTTTACATTCTCTTTCTCTCTACGTTTTATTATAGTCATGGCATCTCAAGCAGTTTCCTTCAAGTCCTTCGCCGTTGCTCTTCTTGTGGCGCTTTTCTTCGCCGCCTCCGCCTCCGCTCAGGACTTGCCTCCGGCGGCGGCGCCGGGACCCGATGCCGGGGCCGCCGGAGCCGTTTCGAGCTCGGTCGCCATGATTGGAGCTTCCGTACTGTTGTCAATGCTCGCCATCTTCAAGCACTGAGTATAATCTGATGGATCCATCTTGTGTGAAGA
Gma.16925.1.A1_at	BG653419		0	No Homology to Known Proteins			GGTGTTCAAACATATTCACGAGGAAGGGATTGATGCGAGAAGAAGTCTTATTGAAGCTGCAGTGCGTTTCAAATAAGTATGTGATTTCCAAGTTGTAGTACATTTGAGTTGATTCACATGGTTGCTATTTGGCTTCTCTCTCACAATTCAATATACTGGTCCCTTCCTTTCTGATTTTTCCTCTTTAATCTTTTTGCAAATAACATGNAAATACTTGTTTTTCTGTTAGACNCGGTGGTTCATTAAGTGGCCAAAACCTGTTTT
Gma.17137.1.S1_at	BE022871		0	No Homology to Known Proteins			GTTCAACAAAATTGCCATGTTCTTTGCTTGTCATCATGTTTTTCCTTGCAACGACTTTGACTTTCACCTTCAAGACCATGACCTAGACAACGTCGTTGCACATTTTTTTAAACTTTGTTATTATCTTCTACTGCTTCGAGCATACTCACTTACTGGTATCATTTGTCCTTT
Gma.17203.1.S1_at	BI321695		0	No Homology to Known Proteins			TTGTTCTTTTTCTCCTACGTTTGATTTTTACAGCAGGAAATGCTCCTGAAAATTTTGGGTGCATTGATGCACAAGCATTGAGCTGTTGGATTGTGGATATGTAGAAGAATAAATCAATTGCAAGGAATATTCATCTTGAGCATGATCAGCAGGTGATGATGTCGGGTTTCTCAATTTGAAAGTGGTTCCCGGAAAGAAAATGATATTGTGTTGTTGGCTTACTAAAAAAAAAAGGCTAAAANGCAATTTTCATTTTCTCAAATCTTTGATTTTAGTCTCCCCACTTTTTAATTGAGGCATTTCATCCCTTTAAAAAGTTTGTGATTTTAGTTTCATTTTTTAATCAAAGACATTTCGTCCTCCACTTTAATAAAAAATCTGTAATTCATTTTTTTTGGG…
Gma.17241.1.A1_at	AW310327		0	No Homology to Known Proteins			GCATGCATTTTAAACGGAGAGCTACTCTAACTATGGTACTATAGAAAAAATCTAAGAGTTTTAGTATTGTTATTTTTTTGGATTAATAGTTGAATGAGTTTGAGAAGTGAAAAAGAGAGAGGGAGAAAGAGAGATTCATTAAATGGAAGCTCGTTTAACTATTGGTAAAAAAAATATCAGTACTAAAACCTTAAATTTCTCAGGCTACCATAGAATTTCTCTTTTAGACTTTTCTAACTTGATAGACTTTGTTTGGATGAGTTTGCTTGCAAATTTTACATTGGCAACTGTCCCCTTTTTTCTCTTTGATTTGGACTCTGCTGCTTTCTTTGTGAAGAATGAGGGAAGAAGACAGTAAAATCGTACAACTCAAAAATGAACTCTATCCCAATTCCT
Gma.17244.1.A1_at	AW309515		0	No Homology to Known Proteins			AAAAATTGCCTTGTTTTCTTCATGAGCACAGGGATGTGGAAGAGACTACAGCTTCATATTAAGTTTGATTCAGAATAGAAGACAAAATGGGTCTGCACATAGCTAGGGGCATTGGGGAACACGAATGACATAATCACAGCGCTCAATGCTCATACAGCACCACTTTTCTTTATCACCATTGTTGTTCACACATTCATATTACTTGCACGCAAATCTGTACACTTTATTATTTTCAACGCAACCAATGTATCCAAACTCTC
Gma.17283.1.A1_at	AW310940		0	No Homology to Known Proteins			TGGCTATCCCGCTTTATTTACTTGCAGCCAATGCAATCAAGTTTGCAGTTGTATTTAATAGTGGCCCAGCTAGCATTATCTGTCTAAGGATCAATAG
Gma.17343.1.A1_at	AW596532		0	No Homology to Known Proteins			TTTTGTTATTCCAGATTTGCTTAGATTTCTGTTGATGGTATGCATAATATATCCGCTACCCATTTTGTGAACACTTGAGTCTGAGGGAATCTTCATGACAAGGTACTGTTATTGAAACAAAACATGGTGGTTCTTAAAGCATGGTGATGGAATGCTGCTATTATGCCGAAGAGGATTCTACAANNNNANNTGGGATTTCGTTTTGTCAAATGATCTTTATGGATACAGCTTGTGGAGCGCTGATCTTTCAGTGGGCTTCCCAAGTGGGACTAATTATTACCATGGTTGTACANNGTTTCATTTTGTATAACTTTCATTGTTTTTTNAAACTGGATTAGACTGACTGGTTTGAG
Gma.17422.1.A1_at	BE821225		0	No Homology to Known Proteins			GGTTTCAGTTAAAGAGCTCGGTCCATCATTTGCTTTGAGGTTTTTGATGCAGAGATTTAACTGAATTTTCCAAGCTCTAGTCACTAGTGGCAATCGCTATACT
Gma.17425.2.S1_at	BM178990		0	No Homology to Known Proteins			GGCCTCATTTCACACAATTAATCTTAATCTCTGAATGCTTCCATCTCCGTCCATTTTAAGTATCATTGTCGTCATGCGATATTATGCTTTATTGGAAGAATCTCCAGGTGAAGAAAGAGCATCTTAGTTGCTTTTTCTGATTATCCGAGCTTTGAAAATATTTGGTGTTTGTTGCTGTCCAAATGGAGTATTGATTGTGGTCAGTGGCTGGTTTTGGAAGTGGATGGCCCTTGATGAAAACAGTTAGATATCGCAAGTCATTTTTTTTTTGTATAGAAACTTGAGTGCCATTAATATGAATATTCTTTTTTATACCCTTTTCAAGTCCAGCTAC
Gma.17601.1.S1_s_at	BI892807		0	No Homology to Known Proteins			GTTTTCAGTGAGATTAGATTCTCATTTTTCTAATTTATATGTATCCGGGGACTGTGGACTTGTTTCTTGCAACAAGCATCTTCACTTTGTTTTTCCTTTTAACTTATGAGCACTTGCTGCTGTGTGCATTGTGTAA
Gma.17639.1.S1_at	CF921774		0	No Homology to Known Proteins			GGGCTCTCGTGTCCGTAAAATGCATTCATATCATGCATCGCATAAGCATCTCTTCATAACATCATAATGAACATATCGTTCCTGCATTTGTCCGTTATCATATTCCAGCCTCACATTTTGCATGAGTCATGGCATCATCATGCATATGCGTTCAACAAACTTTTTGATCTGCAAAATTGCATACCATTTGTTTTCATGTT
Gma.17776.1.A1_at	AW348841		0	No Homology to Known Proteins			GAGCATTAGTGGTGTCACTCAAATAAGGACAAGAAGAATGAGAGGGTGTAGTTTGTAATCACCTGGTCTCAGAATGTGGTAAAATAAGATTGTTGGAGCTACTATTTGTCTCTAGAAATTAAAGTTTCTGATGTAGGCTTTCAGGCTTTTGTTACTATTAATCAATTGCTAAGAGGCTAGCTAGCTACATGCATTTCCTATCCAAACTTTGTGCTTGAACTTTCCTCGATGTGTATGAGGAGAAGAAGAGATTGAAAGGGCAGAGTGTGATTGCTAGTATCAGTAGATGAACAATATCAGTATGTACATGTAATTGCGTATA
Gma.1780.1.S1_at	BM892829		0	No Homology to Known Proteins			TGGATCCGACAAACATTCTGGCAAGAGGAGAAAGAGAGGTAGGTCAAAGAAGAGGAGTGCTAAGAGGGAAGTTAGTGATTCGGATGATTCACGTGAAGAAAGAAGGAGGAGGAAGAGAAGGCGAGAACCCAGGAGGAAGAGGGACAATTCTTCAGATGAAGACGACGAGTATAAGCGCAGGCATAGAAAGAGTAGGAAGGAGAAGAGGAGAAGGAGAAGCCGTCTATCAGATCCTGATTCCTCTGAAGATTTCATTAGAAGGCACAAGCGAAAGAACAAGAGGGCCTCATCATCATCTGACACTGATTCAAGTGGATATAATGATTCAAGGAAGGGTAGGGATGTCAATAAATCAGGAAAGAGAAGGAGCCGTCACCATGGGGATGATGAATGATTAGT…
Gma.17840.1.S1_at	BE821995		0	No Homology to Known Proteins			TTTTCAGTCATCTCTTTGGTCACGTTTTCACAGTAACATAACATATTCTGTGGAAATATGGCAAAACTTGGAGACTGTGCAGCTCATTTTTTTATTGCAGCAATGGTTTTGAGCACGTTTTACGTGACCAAAACTGTGGCACAATCAGAAATTGCACCCACATCGCAAATGGAGACTGGTGCAGGGTTTGCTTTGTCTGTTTCTGGGGTGACCTTATGTTCTTCTGTGTTGGTTTCTATTGTGGCATTTATGATGCAGTGAATTGCAAGGCATATTGGCTCCTATTCATGTTTGATTGGTCTTATCATGTACGTGTTG
Gma.17932.1.A1_at	AW350252		0	No Homology to Known Proteins			GACAATGTTGCAGCAGCATCCTTGCCTCTCGCAGTTCTCCATATTAAGGGTTGTCCCTGTATTTTGACCGGAATATATTTGCAACCTGTAATTTATTGATTCACCCAAGTAGCCTTTGCAAAGAATGTAACTTAAGTCCGTTTTAAATATTCAGACTACAGGGATTCTTTCCCTTTTCATTTTCTTGGGTGCCCTTTATTTGAAATTATAAATTATAAATGTGCTTCATAATTGGAGTGTCCCTGTCCGTTCC
Gma.2471.4.S1_s_at	CA801420		0	No Homology to Known Proteins			TAAATTGAATTCTGCATAAGGCTTTAAAGATTTGAT
Gma.2692.1.S1_at	BI425364		0	No Homology to Known Proteins			TCTTGTGACTTGACCTTATAACTCCTATCGGGATGTCCATTTTAATACTTCGACTTCGTAAAAGGATGCGTAGGGATAACAAAAGAGGCCGTGTTGCCTTAATGTGAGTAGTTTGAT
Gma.2767.1.S1_at	BQ742958		0	No Homology to Known Proteins			TTAGTTTTGATCTTTTGGCTTTACATGTCACAGTTATCGCACAATTCTGGGATGGTTGTGCCCACTTAGGCCTGCAAAATTAGGTTCATTTTGTGCAATCTTAATAGTTTTTTCCTTTTCTTTTTTTCTCTTTTCTTTTCCTGATCTTTGAATGTAAAATTTCGTTGTTATAGAAAACTGACCCTTCTTTCTCTGGGTAGGGGGAGAGCGTGTATTTGCTCTCGTTGTTTTAATATCATTTTGTGCACAGCCCCTTGTAATTTGGG
Gma.2772.1.S1_at	BG238134		0	No Homology to Known Proteins			GAGTTAATTGATTGGCGTCTGGGACGCACGCGCTGTCGGTATAACCACCGTAAGATTGAAGGTTTGGGTTTCTCAAACATGTTAATTAGTTGCCTTGATTTCTCCGAAGAACAAAACGAAAAATGATTCTACACGTCTCCCTCTCTCTCTCTCTTTGTCCTTTTCGGATTAATTAGGTTGTAATAATAAATAATATAGGAGGCTTAGCAGTGCTGTTGATTGATGAAATTTTAAATGATACNAAAGTTTGTTATTAACTGTTGTCTTTTTTTCTTGTGGAAATGACACATTTTCCCTTCATCTCTCTGTATTGAATTATCTTCTCTCCCCCATATATACAANTNNAAGGAACCTATTTGGCTATTTCCATGAGATATTGA
Gma.3000.1.S1_at	BE657172		0	No Homology to Known Proteins			TTACCATACATCTTATGCTTTTGAGCTTTGCTTGTGTTCACTTTAGTTAAGTTTTAAATAAAAGTTTATTTTATTTGGGATTTTTAGTTTATTCCTTTTGTGCTTGATCCTTGGATTGTTTGCTTATGATTTGTAAGAACTTTGTTGAATTCTAATCAAGTGGAAAAGAGTTCACAAGTAACTACACTAGGGAAATCTTAGAAGCTTTGAAGCTAAGAACAAAAGGGGTTCAATCCGAAGAAGTCAAACATATCACACGTCGATCAGAAGCAACCAATGATATTTATGCCTACGGGAGTGCATGATTCTATTCATTTGATTGTAATGGGGAAATTCAATCGGATTCTGAATGAAGAGAACAACCAATGATATTTATGCCTAGGGGTAAATTGTTAGACA…
Gma.3020.1.A1_at	AI437661		0	No Homology to Known Proteins			TTGAAGATGCTGCACATTTGATGTGTGNTCCAATTGAAGGCTAAATCGTTCACTTGTCTCTGTTTTGATCGAGAATGAAGAGAGGTTATTGGCCATATATGGTGACACTCTTTGTTATTTTTGAAGGATCTATCTAGTTTCTCTTGTTAGCATATGAAGTTAACAAAGAGCTCATATTTCAGATGAGTGAGATGACCATGTCTTTCTCTTGGACTGTGAAATACCATATAATGTGATGTGTTGATATAAATCACATTTTTACCAATTTAATTTATATGGTAACCCTAAAAAATGTGTAAATCATATTTATTCTCCTCTTGCAA
Gma.3042.1.S1_at	BM307224		0	No Homology to Known Proteins			TGGTTAAGCACATATCTGAGAATTTTTACGAATATCACACCCATTGTCCCTTATAGGGTTCGAGTATCCTTTTTTGAAAAACAAGTTCGGGTTAACATTCTCGTCTATTGGAGATATTGATCTGTTATATATGGTGTCCATACTTTCTCTTATTTT
Gma.3109.1.A1_at	CD408055		0	No Homology to Known Proteins			GATTTGCGAGTTTTTTCATTCCCAGCTTGTCTTGGAGGGAATTTAAGTAAACAAGGACAAGGATTCAAGGTTGGTGGTCAACATTATATTCTAATGGTTATGATGGCCCACGTGAAGCATGACTGATTTCCGATTTCAAAAAATGTTGTAGTCATTAAAATTGGACTGGGTTTGTAGTATTAGTTTGAAGATGCTCCGAATAATTAAGANTTTTCTATTTATATTTTGGATTCTAATATTTGCACGTTATAATTTCCTATATCTCTTTTATCAGGTT
Gma.3112.3.A1_x_at	BG839772		0	No Homology to Known Proteins			GTAGCTTTTAGACAATGATTCTGGATAACGCAATGGCAAAATATTTGCCATTCAATATAATAAAGAAATAACTGTTCTTTAAGGATGGTGAATTGGTGATTGGTGACTATCNTCCAAGTAACACCATTTTCACTCATTGGGGTCGAATAGCTTTTTTTATCCTTTTTTCATAAGCTTGGCTTATTAAGGTGTATGTACCTTGGTCCATCTTAGTNACAGTGCATGTAAGACCATATCTATTGTGATCCCCACAATTCTGTAACGTGGGGGTGCCCTACTTGTAGGTAGCTTCTCAACATTT
Gma.3121.1.S1_at	BQ453197		0	No Homology to Known Proteins			TAGTTTTTTCATGGTCATGGCCCCATTGGTAATGTAGTTAAACCTGATGATGGTCAATCAGGGACTGCTTTTTNAATTCAAACCAGTTAGGAAGACGTACCAGTTGTGCCAAGAATGTTGTTNANATTTGGNGATNGACCTTGCTTTATNTCATNACTTATTTTCCAAACAAGGTAGCGTTGCTGTTGTTATTCAAGTCGTTGGAGTCTGGGGTTTNTAAATGAGGTGTTNACCTAGAAGAATGGGTTTCATGTGTAAAGTGCGTCAACTTAAATTGTCGTTTCAGTTACCCCTACCCACCCACCCACAAAAAAATAATAATAATATCTTCTNNTNATTTTAGTATAGGTTAGATTTTAATCACCACTTTTTTTTTTNAATAATTTCGGGTTAGGATTG…
Gma.3240.1.S1_at	BE821581		0	No Homology to Known Proteins			GGTGTACCAAGCTAAAACTCGACAACCCCAAGACATGCCAGAGTACGGGAATCAATAGTGACTGCTGTGGATTTTATTTGCCTTGTGCCCTCTTCCATTTCTCAGACTGATTCTCAAATCGGAGCTCATCCAAGTTCAACAATGGAGTTGGAGGGGGCAATTGTTTGATACAGTAATGCAATAGGCAGACAAATGCTTATTGAAGCTATGGATGACACTAATCTGCAGTGAAGGTGCTGCTAAGAATTCTGATCTGCCTTCACTAGACACGGGCACTTCATTGATAC
Gma.3367.1.S1_at	BU083449		0	No Homology to Known Proteins			GATTGCTTTTGATTCCAGTTGTTTAATTGTCAACTGTTTAAGAATAGCTATGTTGCAAAGTAGAGACTACTGTGTGGTGTTGTTGATTTATTAGTAGAGTATAAAATTAAGGATGTTTTGTCAATGTGTGATGCTACATATTTTCTACTTTGATAGTTTCCTGTTCAAAATCACGCAAGTATAAGTGCATGCAATTTCAAATTCCGTGTTGTATATATGTTAAGCTACTATATGTATGTGATCTGTTGGCACGACTTGTG
Gma.3407.1.S1_at	BQ628049		0	No Homology to Known Proteins			AAGGTTAAAGCAATGTTCATAGCACATTTGGCAGAATAAAAAGAATATGGTATGCATCTAAATTTATTAAAACAATAAAAACTGTAGAGATGTGTGTACCCTGGATAGTAATTTGCGAACCATTAAACTCTTTTTTTAATTGTGTGAAGACTTTAATTATATATATTCTCGTGAAGACTGACTTCTATATCATCAAATATTTGTAAGTGCATGGAAGTCAATCTGATTTGAGGGATGCTTCTAGTTCATATGTGAAGGAAGAAAGAATAGAGGAAGTTCACTTCTGTGTTCAAGT
Gma.3441.1.S1_at	CD395226		0	No Homology to Known Proteins			GGTTTCATCTTTTCTTAATTCCAGCTNGTCTGACTTAGATATGGCGGTAAAACCAACAGTTGCATTAAGGGCTATTCTTGTTGGAGGCATAGCAGCATTTGCTAAAATAGCAGGTGCTATGAAAGCTGCAGGTGGTGCAAAAATGGGCGCAGCTGCAGCTGCCATGACAGCAGCAGCAACTGCAGCTGTGGCAGGGTCCAAACAAGAGCAAACAGATGCTTCTCAACAGTCTCCAAAATAATTATCTGTATTTTTTCTTCCAGTTTTACACTGTGTGTTGGTAAGTTTCTGTAGCCTAGTTGAATATTCCAAGTGGAAGAAAGAGGCCATATGTGAATTATAGTCTTGACACATGGTGATAACCTCTTCAAAGTCTTTGTAATAAGATTACACTAAATT…
Gma.3619.1.S1_at	AW831066		0	No Homology to Known Proteins			ACTAGGTCCCATCAAGACAGTTGGTTCCAGCTTCTGGGATTTCTATCTGAGGTCTTCTCAAGGTGCCACGAAGAGATTTTATGGACTGGTTGTTTGTTTCCTGGTGTTGTGGTTTTGTAGTGCCCTGAATTTTGTCATTTTGCGCGTGGTATGAACAATATTCCTTAGGGTCAGTTACAATTTACTAGAGTTTATATATAGCACATTCTTTTGGGGCTTTTACCTCAATATACTCGTGCCATTGTGAATGTAGAAAAGCGGAACTAGGGACGGGTGCCTGTTTAAATTTTAGATAG
Gma.3663.1.S1_at	BQ630452		0	No Homology to Known Proteins			TGGAATAGTCTATTTTGGTTGTTTTGACAGAAGATGAAATTGAAGAATGTGTTTGGGCTAGTGTTTAGGTTCAAATAAAACATCTAGTTTTTCTAGGGAGAAAAAAAGGTTGCATTGCAGCTTTTGGGACCTGGTTTTAGTNNAAGGAAATAGTGAGAGGATAGTAGTTTTAGGCAAGGCTTCTTTTTCCTTTTTTTACCCTTTTTATAGTAATATTATAAGTTGTTGTAANAAGATAGGATAAGCGGGTCGTTTTCATTTGCCTTATGGTTATGGTGATGACACTGATGGGGCTAAAGCGCAAGGTATGGTATGGTTCAACGTTGGCCAAGTTTCAAGTCCAAGTGTTGAAAATTGGTCGATTACCCATGTGTGCCTTTACTGAAAATCCCTGCTCAT
Gma.3681.1.S1_at	BQ454069		0	No Homology to Known Proteins			ATTGACTCTGTCTGGGATTTGTTATTTTTTTCTTCCTCTGTTGAGGCTGTTGTGGCCATTTGCGGATATGAAACTATTGTGTATATGGGGAAAAAAAATCAATTTATGGGGGAATGGTTTGTATAGAATGGGAACAAGGAACTATCCTGTTATTTATCAATGTTGTTTATCATGTAGCCAAAAAATGTGAATGTCTGTAAAGATGTGAAGTTGTGAACTGGTTTCTTGCCATTGTAGTTGTGATTTTAAATATTNGATGCACTGTAAAGCACTGTTTTATCAACCCCTATTT
Gma.375.1.A1_at	AW350435		0	No Homology to Known Proteins			GGCAAAGCATTTCAAATTCTGCATTCNNGNTCATGGGAGAGNACTNGGGGAATAGCAACGGGAGAGGGTGTGCTGAGAATGATGCAGATGATAAGAANNNNTGNAGNTATCGTATCAGGCCATCCAATGTTGTATCACCATTATTAAAATTTATGTCCTCTTTTTTATTCGTTTTATCATGAAGACCNACCATATTGAGGAANGNAGAGATTGCTGAAGCTGCTTTGAGGATTTGTTAATAAGCATTATTTGTCTCCTTGGTCAAATAGATGATGATGGTTTACCGTACCAGTAGAAAAGGGAAAGCATTCGCTTTTTTAAGGACTTAGTCTGTGTATGCTGACTCGGATGATAGTTAGTTTAAGCTGTAGGTGGTGAGAATCCTATCACCAGACTGAT…
Gma.3889.1.S1_at	BI699254		0	No Homology to Known Proteins			TAGAGATTTCTAAACCATGTCAAATTCAGATCATGATCTGGAGGTCTGTTTGTAGAGCTAAATGATTTGTCAAAGACTCAAATGTTGTATTATGGTTTTAAAAGATACCAAAATGCCTATTTTTAAACGATATCCGAAGAGGGTTGCAAGTTGTAAACAAGAGTGATGTATGAACCATGTAGCTCGTTAAATTTTCAGCTTATAACAATGTAGATCACTTGATTGAGACC
Gma.3947.1.S1_at	BI699928		0	No Homology to Known Proteins			GAAGGGACCACAACAATTATATTTGACTAATCACTTGCTAACGGTTGTTGAGATAAATACGTAGGCCATCCCCGGATGCTTGTAAGATAAGAAACGTGCTCTAGAGAATTTTTGCTTTATGCAGAAGTGATGGGGTTGGATGTTAGTTAAGGAGGCACATTTTGATGTAGCACATTTCCTTTTGTGGTGGTTGTCACTATGTAACGATTACTTCAAATTCCAAGC
Gma.4042.1.S1_at	AW781260		0	No Homology to Known Proteins			GGATTCAATTTTCTCATCTATATTCATGGAAGAGCTGTTGGGTTGATTAATTCTTGCCATGAAAAGTTGTAGGCTGATTGCCGTTCCAGTACTACCTGGCGCNTGCATTCTCTAGTGTCAGAGTATTGGATGCTTTTATTGCTAATGTTGTTGTAAAAAGTGTATGATGGAAAACATTGGGAAGGGTATGACATAGATCGGCATGGAGTCTTGGAGGTAGGCAGATACCTGAGACCCTTATTAAACACATTCCTATTGATTGCACAGATAGAATGGTTTACATGAACTTCTTAAAGTTGCAATTACATGGGGTAATTGACCCCGTTTAGCTCTTACAT
Gma.4149.1.S1_at	BQ473865		0	No Homology to Known Proteins			ATTCAGTACCTACACGTCATTCTACCAACGGTTTTTCTTAAATTTACATATTAGACTTGAGTGTTGTATTACTTGTTTGTGTATTTCTTTTATTAATACTAATCATTCAAACTTTATAAATTACAATGCTAACTAAATTTACATCATTTAGACCAGTGGAAACACAATATTTCTGTTGTACACTTTTTTTGTTCTGT
Gma.4551.1.S1_at	AW394473		0	No Homology to Known Proteins			ATTGCGGTTGTTAGTGACGCCACGAGCGACTTGCGGAAAATGTTACGGCTTGATTTTCCCTAATCCTGTGGCGGTTTGTGAATGAACGAGGATTTGAACGGAGGTTGTTGGTGATTAGGGCATTGTAGTGCTCGATCTTCTCTTATTTTTTCAGCGGGAAGGTCGTGTCACGAATGCAAGTCTCTTGTTGTTTAGAACTTTCTTCAGATTGCCGTACATACATGTTACTACTGGGATTAGTCTTCATACTTTTTAGATTAATTACTTTGTGATACTAATTATTAGTTTTAAGGAATAGGCTTCTGTATATCTGTGTAATGCTTTGTAAGTATTTAGGATATAGAAGCATTTTCTTCCTCTCTCAATTATGTGTCCTAGTCTTTTAAGTTTAATGTTTCT…
Gma.5163.1.A1_at	BE822452		0	No Homology to Known Proteins			GGAGGAGCCATTGTTGCAGTAAGTCCAGAAGTTTTAGTCTGGCTTCGTTCGTTGTTTCCTTATATGAAGCAGTTCCTTACTATGGGAGTGGTTTTATGAGGAAACATTATTCCATTGGAAGAGTTGACCGTCAAATGTATTGTAACTAGTGGGAATTGGTTGACCAAGGAAAAGGATATTGGAGGAACAAGCTAACATGACCGAAACCTATGTTTAGTTCAGCATTTCCATTCCTTATTCCTTATATATGGTTCACAGA
Gma.5226.1.A1_at	AW830583		0	No Homology to Known Proteins			GGAACTATGAAAATCAGCCTGCTACCAAGTAGGAGAAAAGAGACAACAGAAGTTTGCGTTTTGATGTCATTTAAACCCTGATTTATGAGCTCTGTATACTGTTTTGCAAGATACGCTCTCGCTAGTTAATAAGATTGAGTTTCTGAATGAAGTCTGGACTCTGGAGCATGGGCCCTCAGTTTAGAACTAACCTTCCAATGTTCTAGAAANCTGGTTCATNCTTCAGAGATCCTTACNTGTCTCTTTTGTACAATGTCAACNNCANATGCTTAATGTGGTTTCTAATCTTCCATTTCTT
Gma.5242.1.A1_at	BF596482		0	No Homology to Known Proteins			GATACTATTGTCTATCAGTTTTGACTAATGTAACGGGTTCCTACAATACGATGACATTAGACTGTTTTAGCATCAGGTGTGTCCTTGAACTTGGAATCAATACAGCATTAGCATTGCTGTGGTGCTATGTTGAACACGTCAAAAAACAACTACAGTTGTACCTTTGGGCAAGAAATTTAGACAACATAATTGTGTATGGAAAGAATATCATGCGGATTTGCATAATCTGTTGAT
Gma.5273.1.S1_at	AI965477		0	No Homology to Known Proteins			GGTTTAATCAATTAGAGTCCAATCTCTTGGCTCTTGAAATAAAGGCATGCATTAATCCGATGTTATTTTCTTGTATTAGTGTGGTTGNNTTTGCTTNGGTCACNTTGGCTTTGTATTTGGTTGAAATAAAGATGCACATGCTACATGTATGCAATCATAT
Gma.551.1.S1_at	BU551297		0	No Homology to Known Proteins			GAAAATCATCAACCGTTAAATTCCTTTGTTTTGAAATGCATATGTAAATCATATATTGGCTATTCCTGGGGATACAGAAGAAACTTGCCATATACTGTGATGATACCAAAAGAACTTTAGTGTGGTGGATTGTTGTTTCAATTGTTGGAAGGAGTCGTCTGAGTTTAGCTTATTATTGGTGTTATCTTTCTCTTGTCTAAGTAAA
Gma.5622.1.S1_at	BG363493		0	No Homology to Known Proteins			CGCCGCAACAACCAAGGACAATAAATCACAAGTTTCTTTTGAATTTCAGGACTTCACCACCGAGATTCATTTCAGAAAGCCACCTTTGACTTTTGCAAATCCAGTTGCATCATGTGACACTAGTATCAAAGACGACAACAAAGGTAAGAAGAAGGAACANCANGANCTTGCTCTCGACCTCAAACTCGCTCTCTAGTACCAATCATGGACCTTCAATTGTGTATATATTGCAATGATGCAATTCGCAAATATCTACAATTTGTCATCTATCAAGTTCTTTATGTATTCCCGTCACAAAAAAAAGTTATTTATATGTTGACGCATGACTTGACCGGGGAAATGNTTTCCGACGAATAACGTACATAAGTACTTTTATAGCAGTTCGATTAATGGTGTCAG…
Gma.5728.1.S1_at	AW278139		0	No Homology to Known Proteins			TTCCATGCACGAGATGCGTTTAATTTTTCTCATCACCCATCTCGGACTTGTGTATTGTTGCATTTTCCGAGAGCTGTTCCTGTTTCATAA
Gma.5773.4.S1_x_at	BG508487		0	No Homology to Known Proteins			GTAAATGTAATCTCTGGTATATGTAAATTTACATACTGAAGGGCATTGGAATTTGTAACACTATTATGATCTGACACTGATGTTAAGACTTGAATATCTATTGATGTAATACTAAATAAAAAATCGACTTGGTCACT
Gma.5799.2.S1_at	BM523744		0	No Homology to Known Proteins			GATGCATTGTCTCAATGTTCGAGAACAGCACCTGTTTGATGTAATTATCTGAATTTCAACTTGTTTTTACGTGTTAGATGTAGTCTTGTAGAGATACTTTTAGATATTTTATTAATTGTTCAGAATACGTCATAGGAACCAGAGGTGTTGAGTGTTGATGTTGTGAATGTGATTGTGTAAGAAAATGTTGGGTGGTCTCGTAATATTTTCTTTTAGTGTGATGTTTGTTCGACTTGTGATAGTTGCGGATCAGTGTTCTCTATGTATTCAACATTTTCT
Gma.5846.1.S1_at	BM567979		0	No Homology to Known Proteins			TCCAAGTTTCTGTTATGCTTACCATTAACTACCATTTAGTATGCTAGCCATTGGGAGCCTGTTAATTTACTCCTGTGCCACCAAAGTGATTCCGCTAGCTTTATGCTCTGTAGAACAATGAATTACTTCTTTTCCTTGTATATATAGCCGCTTAGTTGTGATGTATTATAATGATTCTAAAGTAGGGATGTTTCCAT
Gma.5854.1.S1_at	BM568053		0	No Homology to Known Proteins			AAGACTGGTGAGGATGTGCTTATCACCATAAGTTGGTCATACACAATCCTCTTGCAAATTTCAAGCATCGGTTTGGTGGTCACTCTTGACATTGGTGGTATAAAGTTGGGGCCATTTTCTTGTTGCCTTTTATAAGTNNNNGNNNNNNNNNNNNNNNNNNNNCTAGACTATGATGGTACCAGTGTACATCACTATTTGTCTTGGTTTGCTCTGGAATCTAAAAGCAATTTATGATACCAAAGATTTTTAATAGTTGTGTCAATTGTCAAAAGGATCTTGTGAACATTTCAGGGGATCAATATAGATAGTTCGAGTTTTTGTGTTAAAAGTGTTGATAGATTAGAGAACACAGATAGTGATTTCTCCTCACCCAAACCCCCCCAATTCTTTAGAGGATAC…
Gma.5880.1.S1_at	BQ610080		0	No Homology to Known Proteins			ATGAGTCTACTCTTGATCAAGAAGCCATACAGCTTNCNNGNGCNNNNTNNGCANNNNNGGAGAGTCAATTTTGAAATTTGGTTNGCTTGGTATGGCATAGAATATAACATATACTGATATACTATACTTATGTGTAATTTAATGTTCTCTAAAGAAAAATGTATAATTAACTAAAAAAGCCTGTGTTTATATAATGCTGGATGTACGATGGAAAAGAAAGGAAAGGAATGAGGGGGATTTGGCACAGGCAAACATATTCGAACAGGAGAAAATTTAGGTTGCNAATGTATATATCACAACTGTGTTGCTTTTGTAACCATGGAAATTA
Gma.6003.1.S1_at	BE820894		0	No Homology to Known Proteins			ACCACTTCTGAATTTTAGGCAACAATTTATGTGGCTGTAAGAACATCGAGTTATGATGAGACTTAGCAGCTGGTACCTGGTATGGAGTAGATGTAACAGTTGAGGAAAGGACAGTTATGATGCTCTCAACAAGTTTTGGTGGATGATCAAGACACACTAGGAAAAGTTGAAAAAGTTTGCATACCCAATTTCAATATAGTTTGAATTTTGAAGTATAAGACCAAATGAATTTGTCTTCCACTGTAAGAGCCTGTGGACAGTGGCAATGATTGAACAAATAAAAGTGACCTGTCCTGGGATATTGACTGGTGACGATTATCAGCATTGTCTATGACTCCAGCCTGCATACATTTCCCTCTTTATTGGAGGATTGAAAGTGATTTTCCCTTGAAAGTAAAC…
Gma.6138.1.S1_at	BQ611713		0	No Homology to Known Proteins			GCACGAGGCTTAGGAACTGATTGTTGCTTGTACAACCGTGAATCACTCTCTTCTTAGGGATTGTTTTTCTGATGTCTCGATGAGAATGTGTAATGTTAGNNNNNNNNCNNNNTNNNNNNGAGGGAGTTATTCTACTAAAACCTGAGCATTAGACATATAAGTCGGCTGTGTAGATTTTCAGGGGAAAAATGCCGGATTGCATAGACAGCGTTCTGATTTGAGTGTAGGACAAGACCCCCCTATATCATTTGGGTTAATATTACATAATTATGACTTTGCTAATGTTTCTGGATCATTTTATTTTTTATTTATCTGCAGTTATTTGGGCTTTGTTTTTCTTAGTGTGTAATAACTACATTTATTTTGGAGACGCAAATGTACTAGGAAGAT
Gma.6139.1.S1_at	CD390793		0	No Homology to Known Proteins			CAATACTACTATCTCTTGTTCCTTCTTTGGTTTATCTCTAGCTTAACCTTCTTATTGTTTTTGGACTATCATGTTATGTTTCTACGTGTGAAAATACTACTATTTGGTAACATTCACTCCTTTGACGTTAATAGACCAGTGTCTTCATCGCTGGCTCGTTGCTGGGACCAGTTCAGCCCAGTAATCCCTCTTGGCCTTTATGCAGACTTGCAAACAACACAAATGCTTGCTCTTGCTTTTCATTCCTAGTTGGGGGCATATGATACCAAAGGTTGATAATGTACTGGATGTTGCTCGTGGAAACTGATAAGCATTTATGAAGAAATTATAGTCTATGATGCGTTTGGATTTCTGTAATCTTTTTTTTTTTTTTTTNNNNACTTTTTGGTACATTTTGTT…
Gma.6187.1.S1_at	BF324343		0	No Homology to Known Proteins			GAATTTGGTTCTTCTGTGCAGAAATGCTAAAAATTAGTATATCTGAGCAATGAGTGAGAGAGGATACAACTTTGGCAGTTTAAGAAATAATTGACAGAAAGCAAGAAAACTCATCTGCTCATGCTGCTCAAGTGATTTGTTCTGCAACATCTTTTACGCCTTGGTCTAGTAGAATCCCAATTGGTGAAGGATTTTATCAATTTCTTTAGTTATATGCTTCTCACTATGACATTTGCACATTATTTGGTTGATTAATCTTCACAAAAACTCTACTTTCTCGT
Gma.6262.1.S1_at	CD416257		0	No Homology to Known Proteins			TACTCTCCCTATGAAATACGATATGACTCGCCGGATGCGCACTCCTACAGAAGGCACCGTTACCGATCTGTTTCACGAAGTGCCTCGCCTGATGATCCTTATTATGGAAGGCACCGTTACAGGTCTGTTTCTCGGAGTGCCTCACCCAGGCCAAGGAGAAGGTCAAGGAGGAGCTACTCACGGAGTGCTACACCTGTTTCAAAGAGAAGCAACTCACGAAATGTGTCCCCCAGGTCAAGGAGGAGCCATTCAAGAAGCTCTAAGAGGAGTGGCAAATGTGAGNNACGNNNCTCAAGAAGCTCGAGTGTGAATGCAAGTTCAAGATCAGTATCGAGGTCAAATACTCCAAGGTCTACCTCTCCTTCAACTTGAAATTTGTTGGTCCTATATGGCTTAACA…
Gma.6274.1.S1_at	CD392870		0	No Homology to Known Proteins			TTCCTCTCAAGTCGTAATCATGACAGCAATGGCGGTCCTTCTCGCCGTCGTCTCCGCCGCTCACGCCGCCGATGCGCCGGCACCTAGCCCCTCCTCTCCCGCCTCCGTCATCTCTCCGTCCTTCGCCGTCGGTTTTCTCACCGCCGCTGTTGCTCTCGTCTTCGGTTCTTCTCTCAGGATCTGAACATGCTGCGCTCCGCCCTCTGGATTTTCACTTTCTTTTCTATTTTTTTGTGTGGATTTATCAGAGATCGAGGCTTGACTAGTAGTAGAGTATAGTTTCCCCTGTATTGATGTGCAGAGATTTCATGTGTTCGTTTCA
Gma.6280.2.S1_at	AI938985		0	No Homology to Known Proteins			ACTCACTGAGTACCCGTTAAGCAAGCACTACTGTCGGTATAGTGTGGTCTAAANNANGTTGAATAACATCTGGATTGACACTTCAAGCTTCAATTTCTTGCTTATGAAAATAACCCAACATTACTTATATGGGATTTCAAAAGTTGTTTTGCACTCATCCATATAGAATCAAAACCAAAAGTGTTTAATTTTATGTGTTCATAATGTAAAAAAGTTTGTACTATCAACCAATCAGAAACTTATCACACATGACAGTTTTTGATTGAA
Gma.639.1.S1_at	BU081643		0	No Homology to Known Proteins			AGAGGCTAATTAATTTGTCTAACATGTTTTTAGAGTTTTTGTGTTTAAGTGGAATTGTTTTGGTTGAGGGGGGGCTTGGTGGTTGTTGTGTAAGAGAGAATCTAAGTTCTCCTGCTGACAACAGGGTGTCCTTCGAATCATGGTGTTAGATTTTTAAAAGAATAGTTACATGTAGTAGTTCTTTGTTGTTGTAAGGTGCCATGCCATGATGACAACCCTTTGTGTAAAATTTATGATATGGATATTTCAGCTTGCTTAGGTTACATTCCTGGTCTCATTGTCTATCGCTTATCCTTGCTGAGGATTCAATTTAGTA
Gma.6434.1.S1_at	BQ612772		0	No Homology to Known Proteins			CAGTAATATACATGTCTAGTTAGGTGTGGAGTGGATTTGCAACCCATTCATTTCATCATTGTACGTGTTGTTAAACCTTATTATTGGAAACATCAGTATACATTTTATGGA
Gma.6573.1.S1_at	BI941802		0	No Homology to Known Proteins			GATCGGCCACGGCTACGAGCAAGTTGAGATGCCGCACGGTGCTATGGACGCCAAGGACCCGAACTTCGAGGATCCTGTGGAGATCGCCACCGTGTGATCGCGGTGGTTTCCGGTGGCCAGGTCTGTAAATAGTAGTAATTGGCGAAACGTGTTTTTTCGTGTTCAATAATGTGAAGCGAATCGGAGA
Gma.659.1.S1_at	BU083717		0	No Homology to Known Proteins			AAGGGAGCTTTAATAATGCCACTGCTTGCACTTGCTCTTTCTAGCTATGCATCATTGGGAATATCTCTACTTGTTAATTAGTTTTTTTAGAGTTTGGCGTTTATGCGGCCATTTCCAATTTTTATTTTGATGCTGGGACATGTCAACATATTGATCTTCGCCTAGATGATTGTAAACGTTTTTGAATGCCAAGATTTTCTTCTATTTTTTTTTCACAAGAGGATTTTTTGATTGGACGAATTTAGAGACTAACT
Gma.6627.1.S1_s_at	BQ629303		0	No Homology to Known Proteins			AAGATGCTATAGATGAGGACGAAGATGAGGAGGTTGATAGGTTCGGCTTCTGATGTGATTCGTCACCAGTTGGACTGCATCAGAGCTAGATCTTTGTATAGCACCTTGACCTTCAT
Gma.6758.2.S1_at	BG155059		0	No Homology to Known Proteins			ACCCACTATCCCAATTCCAATAAATACCTTCCTCTCTATATTTTCGCACAATACCCTCTCACCCTTCAACGATGAGTTACTACAATCAGCAGCAACCACCCGTCGGTGTTCCTCCTCCCCAAGGTTACCCACCGCCGGATTCTTACGGAAAGGACGCGTACCCTCCGCCAGGGTACCCGCCGCAAGGAGGATACCCTCCGCAGGCGTATCCAGCACAGGGGTACCCTCCACCCTACGCGCCTCCTCAGTACGCTCAGCCTCCGCCGCAACAACACCAGAATTCATCTGGCCCAGGTTGCTTAGAAGGATGTTTGGCTGCTCTCTGCTGCTGCTGTCTGTTGGATGCGTGCTTCTGAGAGGAGAAGAGGTTGCTTTGCACAAATTGGATTTGAAACTGTG…
Gma.6920.1.S1_s_at	BE610331		0	No Homology to Known Proteins			TTAGCCCGTGCCCTCATATGTGTTCATCAAGCCCTGTGTGGTTGTTGCTCTAGCTCATTGCCTCATTTCTATTGTCATTGTGTCATGATATCAAAGTCAATAAATTGTCAAATAGAAATCATCATCATGATGACTCTTAAGGTACAGTCAATA
Gma.6938.1.A1_at	BU546098		0	No Homology to Known Proteins			TAGTTTCAATGTTAACACGGTGTTTTTTTTTTTTTCACCTCCAGGAGTTTGAACATTTGATGGATTGAGCTTGAGGCAGCATATACAGATGTCGCAGCTTTTAAATGGCTGTGAAACAGAATCTCTTATTTAATGCTTCAAGGTAGGGAACCACCGCTTCATTTTGATCCCATGTGACCCTGTAACAATTTATTTGCATTGGCGAGTTATTTTGGTCCTCGTTGTCGAGGTTTCACTATCACTTACTGGCTCAGCACTAAGGATATGTGGGATTCNAAATANCNTGGNCNGGGAAATGCCCTACCCAGATCGTCCTGTACCATAATATTTGCTTAAATATAAATTTTAACCATTGATTTTAGGGACACAT
Gma.7038.1.S1_at	CA799116		0	No Homology to Known Proteins			TTGTGGAGGCTTTTGCTAGGGCCGTTTCGCAGAAGAGGACCAAGGGCAAGTCCACGCCCTCGCCTTCATCGCAACCGTAGAAAATTCCAAATCGAAAAGGTTGAAATCGGACGGTGACGGTGACGGTGATTGATTAATTCTCTTTAGTGGTTCGGTTTCTGGTTTAGATAGGTTCTCATATTTTGCTATAGTCTTGTGTTACTTTTTTAATTGTTAGCTGGTGATGTTTGGATGTGTTGAATGCTGGAAACTTGATATTGGGTTTAGGATGGGTAAATGTGGGTTTAGCATTTGTAATTTTCTGTCTCATATTTNTTACTCACAGATNTGCTACTCATNGTTACATTTCATTACATCTAACTTTTT
Gma.7135.3.S1_a_at	BF424709		0	No Homology to Known Proteins			TCAGGTGTTCCTTGTTAAGATCTGTGGTTTGGTTTTCGGNAGGGAACAAGAAAAAAAGGAAAAGATGAATAGCTACAGCTACTATGGGTACCAAGAGAAGAACACCTTGACAAGCTGTGAGGAGACGAGGATGGAATCAGTGATNTGCCCCAAACCTCGCCGATTGGGTCTCATAAACCACTCTTC
Gma.719.1.A1_at	AW133378		0	No Homology to Known Proteins			ATGCCCTTTAGGTTACCCGTGCATTTTATTTTATCAGTTCTCAATGTCTAACCTCAACTGGCTGATCGAATTAGTGATACTTTT
Gma.728.1.A1_at	BE658779		0	No Homology to Known Proteins			AAATACAGAGACTTCCCTTTCAAGGAAGTTTCAACTATGATATTTTGTGTTTCTTCTTCCTAGCTTTCTATGTGTTTCTGTACTTCCTTGTACATGTTTTTGGTGGTA
Gma.7480.1.S1_at	BU548002		0	No Homology to Known Proteins			TTATGTGGATTGTACTCTGCGGCTCAAGCAGCCTTTCACTTTCTCATGACATGATTGAACGGAATCACTGCTAATTTTCTTCCAAATATCCTAGGTGCATATCAGTGGTCTGGTCTAAGTTTATCAGATTTTGTTTACTGAGTTTTCAATTTATTGTATTGATAAAGTAGCACAATAATATTCTTTACTACNCGATGTATTAGCAAATAGCCATGAATCCTTCGTGACTTTTTCGATCAATCTTGAAT
Gma.7991.1.S1_at	CD392638		0	No Homology to Known Proteins			GTCGCAGGGTCGAAAGTCCTTCTAGTGAACAGAAGGGTCCACTACACCTCAAAGGTTTCCTCTAACCGTGCCACGTGGTCTAATGTTCTCGCAGTTTCTGCCGCTGTATTGGTCTCAGCAATACTCCTTGTTAATATATGGGCATATGTCAGATCTTAAACTGCTTACATGTAGTGGAAGATCATTTCTTTTGTGCGAAATTTGCCTCCATTGCTTTTTTGCCCGGTTAAG
Gma.8185.1.A1_s_at	BU548568		0	No Homology to Known Proteins			GAAGCAGAAGCACAAGGTACCTATCTGACACACTTTCTGATCATGGGCCAGCTTAAAAGCAGATCATTGGAGCTGTGGGTCACATTCCGGCCGCCATGAACTGGGATCAGAGATCGT
Gma.8366.2.S1_at	CA935791		0	No Homology to Known Proteins			TAAATCTTCGGTTTATTGTGTATGAATTGAGAACTGTAAATTTTAAATAGCATATTCACTGTTGCTCACATTGTTCTGTGGTGTCCTCTTTATTATTCTGGCAATGAGAACACATCCCTTTTTGTTCANNNNACTGTAATATTATTTACTTGCACAATTGAGATGCTGCTGTGAAGTCTTTTTCTGAACAAAA
Gma.8648.1.S1_s_at	BU764853		0	No Homology to Known Proteins			GACCCTGAGGATGATGAGTAGCCAATCCCCTTCTGCAACACTGCTTGGTATAATTGAAAGTTCTGCTTAACTTCGACATTATGGTGTACCAAGCTGAAGTTGTTAATATGTAGTATCTCATTAGATTGTTTTAA
Gma.8652.1.A1_at	CD407809		0	No Homology to Known Proteins			ATCAGTATCCTGACCCTGATAGGATGGAAGATGACTACCATGCAGGACGTGCAACATCTGAATCACATGAAAAGGAGAGAAGTCATGATGTGGACCGTGAATATCGGCGCTCANAGAGATCACATTCCCGGGAGTATGATTATTAGGAATTGNGCATANTACTTCTCAACTTTAATTGGTAAGATTTCATCATTTGGTACATTTACTTTTGAATCTTGCTCCCCCGGTATTGGTAGTTTTTGAATGGATTAAAGCACGGTGTGATCATTACAAAGAAAACTGTAGCTGCTNCCATCCATATNNTCCATATTTNAAANCTTNAATACTNCATCTTTCGAGACGTTTGNNGCCTTTTGTCAACCTGGACTTGGACATCTAATATTGGTATTTTATTTGGCA…
Gma.8738.1.A1_at	BU764151		0	No Homology to Known Proteins			ATGATCTATATTTTCAGTGTGCTAATACGAAGCTTCTAATGATGAATGATATATGGGTTTGCACCTGCCCTGATGAGTTTGGTGATGATTTTTGTTTCTATTACGGGTTTGATATATTTTTGTGGAACATACGTCAGTTTTACATTTGGCTACACAGTTGTGCGGATGCGTTTGTCTCGTATATAGTAGTTTCATTAATGTGGAGTGCTCAGCAGGTTGTAATGACATA
Gma.8961.1.S1_at	BU765186		0	No Homology to Known Proteins			TTTCTCTTGTTTTGGGTAGTTCTGTGAACAGATAGTATTAATTTGTTATGTGTATATTAGTTGGTACTTGGTAGATTAGAGAGGGACTTGATACATACTTAGAAGATCTCACTAGCTGATTTCACACGTTTTGAAATAGTCTTTACAAGCTAAATCTTCTTCAATTCCTTCATTGAAGATTGCTTTGACTTGTTTGCAATCTTTCTGTATATCTATAGGACAAGTAG
Gma.9750.1.S1_at	CA934950		0	No Homology to Known Proteins			GGAACACCAGTCTTTACATTTAATTTTATTTTTTATAATTTGGATGATGGTAAAGCACAGATCTGAGAATGTTTACGAATATAACACCCCTTGTCCCTTGTAGGGTTCAAGTATCCTTTTTTGAAAAACAAGTTCGGGTTAAAATGCTCGTCTATTGGAGATATTGGTCTGTAATATATGGTGTCCGTATTTTCTCTCTCTTT
Gma.9776.1.S1_at	AW734330		0	No Homology to Known Proteins			GCTTCTATGATTTCATTGCCGTGGATTGTTTCTCAATTGTGAAGAATTTTGATGTTGACAAGATTCTCCGTTCTACACTTGATTGATTGCTTAGACGAGTCACTATTGTGACTTGAAATGAATTGAACAACATACACAAATGTATCTCCACTTGCTCAGTTGACATACTATTGTTACATGTGGAGAGTACAATGTGAAGTCAACTGCCCTGATTGCTTGTAGTTTGCAACCGAAAATCTTTATATATATTTTTTTGTTTGTGTACCGTCTTCCTTNNNNNNNNNNNNNNNNNNNNNNNNNNNNNNNNNNNNNNNNNNNNNNNNNNNNNNNNACCCACTTATTTTCTTACCGTTCATGATGATGTGAAAGCAAGGCAGGTGTTGTGGAGTGATCTCAGGT…
Gma.9797.1.S1_at	CA936781		0	No Homology to Known Proteins			AGAAGCGGCAGTCACACCTATTCTATAGTTGATATCATCAATCTGCACTCTTTTTTTTTTTGTATGCGTGTAAGATATTTTGTATTCCTCTCTTCATTGTTTCATTTCTTTTGGTCGCTAGTTATTTCTGATGTGTGCTTCCTGTAATCTCCTAGGCATATTTTAAAAATGCCATTTCGTCTGTTTGTAACTTAAAAAACTACTAGCAAAACGCTGGTGCACGTGTCATTGTAATTTTTCGCTAAATTG
GmaAffx.10636.1.S1_s_at	CA851343		0	No Homology to Known Proteins			TGGAATTTTCCTGCTCCTTTTGCACAAAACACACACTCTGCTTCTATTATAATTCATGCTTGTCCTTGTCCTTGTGCTGGTTTTTTTCTAGATAGGGTTTGCACTTTTTAATCAGAACTAGCCAAGACCAGGTACAGAAAGTAC
GmaAffx.11172.1.A1_at	CD404556		0	No Homology to Known Proteins			GAAACTCTGGTTTCGCCAATGAAGCATTAAGGTTGTTGAATGTTGATGTGCCACGCGAAGCAAGTGTAAGGAAGAATAAGATGTGTAAAATATTTTTAAGTCGTGTGATTTTATCGCTGGTTCATGTATGTTGGGATTAAATGTGTAATATGTATATGCAGAAGGGAGGGGCCAAGCATTGTATAGATGTTAATATTTGATGAAGCTCAGTTATGTGTTGTTACTTGTGTCGGGTTATGTATCCATCACTGATGTAAAAAAACACTGCTTCATCTATTTGTTAGTATATGGAAATNGGTATATGCTTTCTTGTATTATTGTGAGAAGCATATATTTAATGACTCTATCTTAAATTCCCTGGCATTTCTTAAAGTAG
GmaAffx.11180.1.A1_at	CA782201		0	No Homology to Known Proteins			ACGTGCGTTAGAGGGTGAGTATCACTNTCCATTACTATGTGCGACGTCGCATGCGAAGATCAGTTACAGATCTATGAANCNNNNACCATGGGTGTCGGCGAGAAGAGCAACGCGAACGGAAATCATGGGTGGTGATCCCTTCGACTTCGACCCTAGCAACACAAATCTGGAGTTTCTTTCACTTTGTTTTTTCGGTTTTTGATTCAGATGCATCTTGACTTGTTTCATATATTTTTATTGATTTTTGGATTGGTTTCTTAAATTTGTAGATCTGAGACTGGATATGAATCTTA
GmaAffx.11371.1.S1_at	BE658169		0	No Homology to Known Proteins			TCGAGCTTTTTGTTATAGCCGATCATGGTTTTCTGACTTCTCTCTCAAAGCATGCTCTTTCCAGTTTCAACCAATTTATGTTGAAATTTAATATTTCCCCACTTTGTTGGGCAAAGGTTTTTGTAATATTATAGTGGTGGCTGAAATGAACAAAAGGTTCCCGCCGATGATTTCAATTGAGCAGACTTTTTATGCCTTGTGACTAGTATGGAAACATGTTCATTATGTTTGAATTCTATATATTTAGTGAGAGATTAACATAGACCAAGGGCAAAGGTTATCTTATTACGTTGCACAACAGGGCGTGTGCCACATTATTATCAAAT
GmaAffx.12237.1.S1_at	AW781253		0	No Homology to Known Proteins			GAAGTTGTTGAAATGATAGGACCATTGTATGAGCTGGTTTGATCCGCTTATTTTCCCTGCATCCTGGGTTGTGAGTTTACAATATAGGTTTTAAGCTTTGCATGCTGCAACTTTTCATGTCTTATGTTCTGTTTGTCTCTGGCATGATTCCTTGGCTGTCCATATTGTATTTTTTTCTCCCTTCAGTGTGTGTGATCATTAACATGTACCTTATTTGTGTACCCCNAACTTCTGTGTTTGGACAAGTATGATCTGGTAACACGAATACTCTCATAGGAGATTTCTTCGGC
GmaAffx.12258.2.S1_at	BU549964		0	No Homology to Known Proteins			AAAACTTAGAAGCACTTGATCCTTTNGCATCATCAANACATCAAAACATCTTGCTTCTACATAGGAGTCATTTGACTTAATCCATCANNNNAAANATCCTTCAACTATTTNTCGTCCTTGGAAAATTCTTTTTNGCAAGAATCAANTGCNTCTTTCATTCTTCCTCACTACGAGGTTGTGAAAACAAGACAACAATTGGTACCTCTAAGCCCTACACTGGGGCAATGAAAGGCNCCATGCATAAACCTCAAANGAACCTAGGGGCAGATTAGAAGTTCTCACNCAATAGGTTCCCAGCTACAAGGTCATGACGAAAGACAACGATTGGTACCTCAAAGCCTTACACTGGGGCAATGAGGGGCACCGTGCAGGAGCCTCAAGTGAACATAGGGGCCGATC…
GmaAffx.12921.1.A1_at	BE822609		0	No Homology to Known Proteins			TTGGACATTCGGAGTGGCATCCCTGCACAGCATAACAATCTTGTTAATGATAGCAAAGCTTTGGTATCTGATCGTTGAGTTTTCCACTCACAGGAAATGCAAGTCCTTGACTGTGACATTCGCAGGTTTATAGTAATTCCATTCAGTTTGACCTATAGAATGTACAGTATATAGCAAAGTTCTCGTCAATACAAGAGCTCTATTTCTATACTCTCTGATCAGATTAAAATGTTTATCTATGACTGTACAAACTGGAATTTGGAATGACTTGATCTC
GmaAffx.1301.45.S1_at	BG157835		0	No Homology to Known Proteins			AGAGGAAGGCATATGTTTGTGTTTGTTGGTTAAGTGGACTCGTTATGTATTATGCCTAATTCTTGATCATTTATAGTTTCGCTTTGTTTACTTTGTTGTTTTTTTTTTTTTNAACATTTTGGTAGCTTTTCTGATGCTTTTTTGNTCTTTAGTTTCCCCCCAACAACTATGCTTCTGAAAACGTGTAGCATCTTTTTGGCGTTTAATAGATCTCCTACAATT
GmaAffx.1301.61.A1_at	BG650277		0	No Homology to Known Proteins			AAAAACTCGAGACCAAAAGATGAAGAGACTTCCAAGTGACATGGGCAATGAATGTAGCTAACTTTATATGCTTCATTTGCTTTTTGAATGATTGCNGGAAAGAGCAGTCCCTTGTACTTGGCTTAGAAATTGTTAGTTCTATGCCTGCATACCTAGAGACATGGTAACTTGGTTGGAAACAGGCTGTTTTTACGCTTTAGAGTGATGACAAACTATGTATCTGGAATTTTCTTAGATACGGCCATTTTTATTCACTTCAGAAATTTCTTTTTT
GmaAffx.13587.1.S1_at	BG654181		0	No Homology to Known Proteins			TTTCTAGCCCCTTCTACGAGTTTATTTTTTGTTGTTCCTTTTACCAATCTCTTTGCTATCTATCATCTTGTGTATATAAATTTTGCTGACCAGTAAAATAGTATGATAGGAACTCTGAAAGTACCATTAGGGATCTTTTATGTGCATGTTATGCCTCCTTGTTTGGACTTCTCGTTTGTGTTAGTCCCACTTAGTCTGCATGT
GmaAffx.13655.1.A1_at	BE657982		0	No Homology to Known Proteins			GAGCTTGAAAAGACCGCTTTACTCTTTGGCTGCAGAGTTTGTCTCAAAATGGACTAGTGTGTTATTAGGTGCAATGTACTGTAATTAACTTGTTAGTGAGACTGTGACACAATCTTTCCATTTCCATATTCCTGAAGGTT
GmaAffx.14100.1.S1_at	BI423789		0	No Homology to Known Proteins			ATATAGGTGCATCATTTCAACAGGAAACATCGATGCTTCCCTGGAGTTGTCTCCTCTCAATTAAAGGCATACTAGGTAGGTGCGAGAATGATTGATCAACATTCAAGTTCCTCAAGTTTTGGTCGTCCCCAATATGTATGTATTGTATTTTCTACTTGTTATTCTTTGTGATTTGCTTTTAATTTATAGTTTCCACCTCATGTTATATAATAGCATTTTGAAGTAGTTTACCCGTGAATATTGCAAAGTTGGAATTAGTTCTCTTTTTATTGTT
GmaAffx.147.1.S1_at	AW100906		0	No Homology to Known Proteins			AACCAGGTGTAGAAGTAGATTACTCCATGATAAGATTGTTGGTGGTGTCTAACTGTAATGGCATAGCTCTAGTCTCGTGAATGTGAATGTGGAGGAGTGGACTACTAACATTGTTTTTTATTCGTATGATATA
GmaAffx.14977.1.S1_at	BG157630		0	No Homology to Known Proteins			AGAGGTCGCCGAATGTTGTCACATCAAATGCTCCTGACAGTTTTGTGATCCCAGCATCATTAAAAGTTGATCATGATGACTGCAAGTATGTTGGGGATCCTTCCATCTNCAGTTCTTCAGTTGTGCCTTCTCTAACTAACATGGTTATGTGTAGGTGACTCCTTGATCCATTTCTTAGTTTCTGGGTTCTCTACTCTCACTCCTTTGCCTTCAAGTATGTACTTATTTAGCCCCTAAACCTTAATGCATCTTTTCGATGCCCTGTCTTGTCCAGATCTTCATCCAGGATCTCTTTTCTTCGTCAATTTCCTTTGTTAACATAGAAATTTATCTTAGGTTAGTCTTTTTCTTCCCCAACCTTTCATTAGTTTTGTGGTTTATGGCATCGAAGCCAAGGAG…
GmaAffx.14977.2.A1_s_at	BQ298894		0	No Homology to Known Proteins			AAAGGTCACCGAATGTTATGAAATCAAATGCTCCTGACAGTTTTTTGATCCCGGCATCATTGAAAGTTGATCATGATGACTGCAAGTATGTTGGGGATCCTTCCATCTTCAGTTCTTCAGTTGTGCCTTCTTTAACTAACATGGTTATGTGTAGGTGACTCCATGATTCATATCTTAGTTTCCGGGTTCTTTACTTCTCTCACTCCTTTGCTTTTAAGTACATGTATTTAGCCCCTAAA
GmaAffx.15910.1.A1_at	AW101877		0	No Homology to Known Proteins			ACGAAGATCGTTGATTAGTGAGAACTTTTGCTGGTTTTGGTGCTCTGTAAATATACTACATTAGGATCTTGATAGAAAAAAAAAATGAGGCACATAAATGTTAGGGTTTGCAATTTCTTTTTGTTTGGGGTTCTTTTTTCTGATTGATTGTTGTAGTTGTAGTTCGATGCTCTCTCGTTGTAAAGGTAAAGATATTTTTCACTTTGTTGTTGCAGAATGAGAATCTCTTTTGAATTTTCCAT
GmaAffx.16423.1.S1_at	BE021487		0	No Homology to Known Proteins			GTGGCGGAGGAATCTACTACTACCCTCCTCCCAGCAACGGAAACTACCCGAGACCACNNACNCGCCGAACCCGATTGTGCCGTATTTCCCGTTCTACTACTACAGCCCTCCGCCGCCCGGGTCCACCGCCGCTCCTCCGCCCTCCACGGCCTCCTCGCTTCTATGTGCACTTGCTTTCTCATCTTTTCTACTGTTGTTGCTTTGATAGTAAATGCATGAAACCAAGAAAAAGAAGGAAAATAGTAGGAATAAGGGCGCAGATTTGCAGATCTAGAGATTCCGAGGGAAATGAGAGTTGAGAGTGAGAGTGAGGTAATAGAAGTGCTCGTGAATTTCCCAATCTGCCCTGAACATGTGAAGTAAAGCACCACACCACACGCACTATATCCTCCTCTTAAT…
GmaAffx.17459.1.A1_at	BE820806		0	No Homology to Known Proteins			GGCGAAACACCACAGCAGCATTGGGATGGCCGGTAGCGGGCAATAGACACACCGCCACCACCTCTAGAGTTAACCTCAGCTCATCCGCAAAAAAAAGTTTGAGTGTTGCCTACGACACATGGCCGACCNNNAGGCNACCAAGTCCAAAGCCAAAGGTAAGCAAAGTACTAGGTCAGTGACNGACAAGTCATAANGCGTCCAGCTAAAGACGTTAAAGAAGCGCTACTAGGAGGCAACCTAGTACCTTTTGAATCTATGCTTGTTATTTGATCACTTTTNATAGTAGGACNCACCTAGTTGCTCATGATCCTNGGNATTTNAATAAAACAAGCGCAAGCTCGNAAGGTAGTCATACCTNACAAAANATATATATGTATGTTTAGGTAGTGAAAATACCTT…
GmaAffx.18610.1.S1_at	BI787904		0	No Homology to Known Proteins			ATTCAGGCAATGGTGCGTCGTCTACTGGTGGAAGCTTATCTGATGGCGACTTGGAAGTGTCAACTGCTGATTCTGAATCATATACAGGGAATGTTTTTTCTCCTTTGGATGTGAATGTCAATGTTAGTGTTCGATAACAAAGTTCTGGGATTATCCAGATTATAGAGATGTAACTTAGTAAGCACCCCTTCTCTCCCCTTTTTTTTCTCTCCAAGGAGAGGATGGGGAAAAACAAGTAACATTTGATGTGGATGTAAATTAGTTGCCTTCAGGATGTTGGAACTTGGAAGAGTGGTTTACTGAGCTTCTTAATTCAAA
GmaAffx.18709.1.A1_at	BI967583		0	No Homology to Known Proteins			AGTATAGTTCACATCTGAGTTTGTTTGTAGCGGCGCAGTACTTTGTGAACTTCTCAGTGTCGTATGTGTCCCACCTGACTAGAGTGTTGTATATTGTTATATCTCAGCCTTTGGTTATCTTTTACTCGTGCGGCAAGCCTGCTTATCAAGTTGAGA
GmaAffx.18953.1.S1_at	BM178798		0	No Homology to Known Proteins			TGTACCTAACTACTACTCATGCCGGCTTTGGTCTGCACGTGTGGTGACTATTATCTGTTCTTGGGATTGTTGAATTTGACTGCCATTGATCACTAGGAAAAAATGAGATCATAGGTACCTAAAAATAAGAAAAATGATCTCAACTGGGTGAAGAATGAAGATCCATTAGCTATGTTAGGAATTGTGTCGACATGTAAGGACTAAGGACCCCTAGTAG
GmaAffx.1917.1.S1_s_at	BQ298997		0	No Homology to Known Proteins			GAAAGCTACAAAGCTATGCTTAAGGTTTATGCATGCCACTTGCCATTTTTTGGTCTTAGTTAGTTATCTTGGACATTACTACATTCCGAAGAAAACACGGTCTCTCTCCTTTGTTAATTAATTATA
GmaAffx.20583.1.S1_at	BE819951		0	No Homology to Known Proteins			GACAGAATTTTGATGTTTGGGCCCTTAGTTGGTTCTTAGTCTCAATCATGGTGGGCTTTTTGTGCGATGGCAACACTTACTGCTTCTTTCCATTCATATTATCTGCGAGTTCTTATTTGCTGATGGGATCCNCCGTGGCTTGTCGTAGAGTCACACCTGGATCAGTTGGAGGATGATAGGATCTCAACTTAAATGTAATATTTGTAGAATAATATACAAATTTTCAAATCACTGGTTCAGCCATCATTAATTAAGTAGAACGTCTCTATTCTCAATGGATAATACATGTNCCATATGACTATGACTATAATGACCGTCAAGATCCTAGTAGCACTG
GmaAffx.20840.1.S1_at	AW156235		0	No Homology to Known Proteins			ATATGGTGTTGCTTTATTGGTTTAATGTATTTAACATAAAATTTTAAACAAGGATTAACGGTTGTAAGTAGGATGGTCAGATTTTCATTTTACTCGTTGCAGTGGCTTGTAGTCAGTTCTTAGTTCTTAGCGCTTTTATTGGTAGTGTCCTTTCTTTTCTAAAATTATGGTANGGTTAATTAACTTTTTAATTCCTCATCATA
GmaAffx.23292.1.A1_at	BI967795		0	No Homology to Known Proteins			CTACCCATTATCCAAAAACGCCAAGGCCGGTGGGCCTGGGCCCACCCCCACCAAGGTTCCGGGTACTTTGATTTGGCATAAATAACATATACATATATCACTGAGAGCTTCATCGGGCCTAGGCGGAAAAAGCTTGTTGTTACAGTGCTTCGGGTTAATTATATATCTTGTACTCTAGTCTTTTTTTTTCTCTTCCGATTTGTTAGAGTAAACTGTAACAGTAGCTGTTCTCGTAACGTCTGGTATATTGTTAATCTGGAAGTGTCTGAACGTGTTCAT
GmaAffx.236.1.S1_at	AW306854		0	No Homology to Known Proteins			TTATTACCAGCAGTTGAAGCAATCTGCTTTTCTTTTTCCCATTCTTTCTATAATAATCTTCGGGAGGTTTTGATGGAGATTTAGGTGGGCCTGGATACAGTTGGTCGTTTTAGATCCCGGGTAGAATATTTACATTATTATTTATATATGAAATGTAAGGACATCCTGCCATTCAGGATATGTTGCAGTTGTATGCCTTGAATGGGCTTTTACATAAATTTTGCTGAGCAAGTGTTAGATTCTTGTGCGGGATGGCAATATTGTGAATTTTAGATATTGCATTCATATA
GmaAffx.23906.1.S1_at	BM891960		0	No Homology to Known Proteins			GGGATATCCCTTTTGTATTATTCACAGGAAATATCCATTTGTTTCTTTGCCAGTTTATGTTCAGTGAAAAGGCTGGCTTGATGCCACTCCCATTGGTAGATGTCACATGAATACTCAGTACTATCAGTGCCAACATTTCCATCTTTCTTCTTCCAGCCTTTGCTTTGTCTTGGTTGGTATAGAAGTGACAATCCAGCCGCACTCTTAACGTGGATAATGATTTCATTTTTGAATATTGATAACCTAGTCCCCTGGAGTAGTGTTAATATTCTTTTTGGCAGTGAACACACAGTCCACTGTCAAGTTACCTAG
GmaAffx.24570.1.A1_at	BU764146		0	No Homology to Known Proteins			CCTCCTTTTGTATTTCGGTCGTCAGCAATAAATATACAAAGGTTGTTTCTTTGTTGCAGATTTTCAAGAACTTTGTCGAACTTGAAANAATTTGCTNAACCTTCGAGCCTGTATTTTTTATGTTAATGTTGCTTT
GmaAffx.24872.1.S1_at	CA935146		0	No Homology to Known Proteins			CTTCTTGATGATTTACCGATTGGCTAGAACCAAACTCATCCAACTTTGGTTCAGTATATGGATGGCTGCTTGGTTGTATAAGTCTGATTCAATTAT
GmaAffx.27061.1.A1_at	CD396141		0	No Homology to Known Proteins			AGGTGTTTGAGATTGTGGCTGACTTGTTGCTTGTGGCGGTCAAAGTGGTGGATGGTGGGCTGGAGTTTGAGGAGCTTCATTGGGATGATTGGAGAATTGGCCTTCCAGATCTTGTTCTCTCATGGCATGATGTTGGATTGGAGCTTTAGAGAATACAGTCTAAGGTTTTGTACAGATGGTCCTAGTAGTCCTTTATGTTTATGTGTTTGGTTCCTTT
GmaAffx.27505.1.A1_s_at	BI273666		0	No Homology to Known Proteins			AGTGGCAGGATGCTATATTCCACGGGGGCTACTAGATATCTGCCCTATTTTTTTTATACATTTAGTTTTTTTTTGGGTGCATTGAATCTGTCTTGTTAGTCTGTGTTGTAATGGCAACTTTTTT
GmaAffx.27583.1.S1_at	BG511686		0	No Homology to Known Proteins			TTATGTAATCCGCAAGGTTCCGTAACATTACGGAAAGAAANCAAGTATCGTTANGAAATTCGTAAGTTTCCGTAACTTTACGAAAAAAGAATCACCAAAAAANAGNNNANGGGGNTGTANTTAGTAAAANNGGGGGTGCAAATAGCACCCAGGCCCACTTGGGCCCTCNAGAANATTCCTCCAGAAGGCTGTTGCTTCTGNAGGAAGCAACCNNNNNNNNNTGGNNNNNNNNNNCTCGCCTGGGCGAGCTGGGCGGCAACCACCTCCCCTATTTTGCTATAAATAGGGGAGGAAGTGAAGAAGAAANGGGTTCAGCCCCTTAGGCATTTCTCTTTTTTTCGAATTTGCTTGGAAAAATTGTTTCCGTGAAGAAAATCTAAGCCGAGGCGCTTCCGAAAC…
GmaAffx.28238.1.S1_at	BM308645		0	No Homology to Known Proteins			TACTGATGTCAGCATGCTTCTCTTGGGACGTTCCATCTCTGGAGGTGCTTCCAGGTTGATTTCTTAGGCAAATGGATGTACCGTGCCTACAATTTTATGCCTAGTTGGCTCAGTTGCATGTTTAGATTGGTAAAACAAGGTTATATTTTTGTGATTCTTCTTCTGGGTTCAGTTCACTCCCAATTCAAGAATTTTTTTTTCTTGAATGTAGTTTCTCCTTTTCCT
GmaAffx.28382.1.S1_at	BM528798		0	No Homology to Known Proteins			TAACTAGTTAGTGGCTTAGGCATTCTGTATTGTGCCATGTTGGTGCATCGTAGGTATTCACTAGTTTGGTCTTGTCAACTTCTTAATGTGGATAGAATTATTTAATATTTGATGGGTTCTGATTCTGAACGTCTCTAACATTTGTCCTGCATTGGGATATTTATGT
GmaAffx.28517.1.S1_at	BM954423		0	No Homology to Known Proteins			AATCACATTATTGCAAGCTCCTTATAGTAAACAATGTTTTTGAGAAATTCTTCTCAGACTAAATTATAAAC
GmaAffx.29357.1.S1_at	CA803053		0	No Homology to Known Proteins			TGTCTTTGCCATTATATGGCTGCACCGTTGTCTCTTGTAACTAGGGTGTGGCTTGCCGATCGATAAAAAAAACTGGTGTGTGGCTTCAATAAATGGCCTTTGTACATACATTTCTAGTTGCAACTTGCAAGTGTTTCATACTAA
GmaAffx.29421.1.S1_s_at	CA852386		0	No Homology to Known Proteins			AAGTTCTCACGTATAATTGCCACTAGACCAAAAAGTACAAGATAGGAACATTATGACCTGCGTATGCTAAATGAAAGTGCCAGCTGACTGTAATTTTTGAAATTTATCAGCATGTGAATACATTATAATGACCGTCTGCAATATTTCTTATTTTAAAATGATGCTGACTAC
GmaAffx.30028.1.A1_at	BU544443		0	No Homology to Known Proteins			GAAAGTTGATGGTAGTGGCAAGAAAAAGAAAGGTGGGAGTGGATTTCAGGTGGGGAAGAGAAAAGTGAANNNNAAGTTGACTGCCCTTGNNAAANCTAAGGCTGCNCAGGCAATGGAGCTTGACAAATGAGGTTCGACTTGTGTAATTTTAGNCAATGTGTTGAAAATTGGTAGATGACAGTGTTGTTTTGAGGCTCAATATCCTTGTTCTGTTNNGCTATATGACTATGAGGTTGTAAGTTGTATATTAGGTGACTATT
GmaAffx.3027.2.S1_at	AW349347		0	No Homology to Known Proteins			AGCGCCGTCGCGGACTACGAATCTAGCGACGACGAGCGGCACTTCAAACGGAGGCCGTCGAGGTACGAGCCGTCGCCCCCGCCGCAGCCGGCGGNAGTGGNAGGAGGAAGGNAGGCATTCGAGAGGAACGAGGGAGCGGAAGCATAGGTGACTTGCAATTTTGATAGAGTTGTGCCGGCAGCCATTTTGCCAACGACGAAGGGAACGGACACTGTAACTGCTAAGCGGTGCTGCTGTGCTTACTTTGCTCAGAGAGACGATGCTATGATGGTCTTTATTACATTGCTCTCTCTTCCCAACCGACCTTCTTNGAATGTAACTTTGCTGCTGTCACTCAATCCCCTCAATTTTCAATA
GmaAffx.31029.1.A1_at	BE659140		0	No Homology to Known Proteins			AAGCTACCCAGAAATTGCCCTTTTGATGCCAAATATACACCGTCATGAATCTTATTTAAACATCTTATAAGCTTCTATAGGATGCCAATTAGCA
GmaAffx.33092.1.S1_at	BQ454285		0	No Homology to Known Proteins			AAGTGTTTGAAGCTTCCTCTGATAATGCTGCTAACCATGATTCCTACTGTGGAACTAGCTACTACTTGGAAACATCACTCACAAAGGTTCACTGGTCTATTGGAGAAGCGCTGTAACATGCTTGGTTGTGTTGTATACAGTGACTGCATAAATAGATAATTTTCTGTTATGTTGTAATATCAATAGATTGATCAAGGCTGTTAGAACATCCAATGTGCCACTAAAAGCAGCCTAATAATGTACGGATACATACCCCTTTTTTG
GmaAffx.33417.1.A1_at	AW348567		0	No Homology to Known Proteins			AGGGCGTGGACTTGGTCGTGGCCGAGGTTCTTATAACAATAGAGGAGACAACTCCAATAATGAAAGGCAGGACTCTGGTTATGGGGGCAGATGGGGTTCTAATAATACAAAGGATTCGGATGATGGTTTAAGCAATTTTCCAGGGGCCAAGGTTCANAATTCTCCTGGAAGGGAAGGGAACGGATGGGGATCTGGAAATTCTGGCGGCCGTGGTTGGTGAACTCACCTCACCTGTGAGAACTTAGTTTAGCTTTACCCACAGGCGGTAGGTTGGTCATTATGTAATCCTCTTTTTCCCACTGAAATGAATGGATGATGATATTTGGGTAGTTTATTTTTGCAATGTAAT
GmaAffx.34643.1.A1_at	AW349549		0	No Homology to Known Proteins			TGAAGCGAGCGAGAAGTTGAAGAAAGCGTTGATGGGAGCGGCTGCTGGTAGTTCTTGAATTTAAATCCGTAGAAATGAAATGCAATCAGTTTGCACTGTCATTGTTTTTTGAGTATATTGTCTATAATTTTTTTGGGGGTTGTAGATTTGCGTTTTTCTCTCAGTTTTTAGTTTCAGTTTTGTTGCTGCGAAATTTTTGTGTAGTTTATATATATTATGATATAGGTTGGTTCGTTAAGGCTTGTTCTTGTATTCAGTTTTGA
GmaAffx.34785.1.S1_s_at	AW310421		0	No Homology to Known Proteins			ATGATAACTCGTCGGATCGCACGGCCTTTGTGCCGGCGACGCA
GmaAffx.35114.1.S1_at	BE021763		0	No Homology to Known Proteins			GCGCCATGTGCATAAACCACCTGTATCTGCCACCGCTCCGGCGCCACAACCACTTTTCAGCCTCTTCAAACTCGCCGCTTGCGATAAGGTCTCAATCGCTTCAACAACCAAGCCATCAACGCTTCAGCCCCCAGCGCCGTCAAACGCTCCGAACGCACCCATTCTTTCATTGAAGAGCCTACGACGCTCGTGGAGCAGCTTAAGAAGGAGAGCGAGTGGCTTGACGAATCTTAAATTT
GmaAffx.35464.1.A1_at	BE657554		0	No Homology to Known Proteins			GGCGTTTTCCAATGGTCTAATATTTAGTGCATCTCTTCTGCCCTAAGCTATCTTTGGTGGAAGATTTGGTTCTATTGTGGTGGTAAAAGGAAACCCATATAATGAAGAGAATGATCCTTGCATGTTAAGTGGAGACAGGGTTAGACCTTGCAAGTTACTCAAGTTTAAAGAATATCTCTCCATGCCTTCACCGTTCCTCTTGATGTGGTTCTCTTATCTCTTGGTGCTATAGCTTGTTATGTTTAGAACAATTGGTGGTTTGCTCTTATTAATTTTTGTAATTGTAGAGACCTCCAGAACAAAAAT
GmaAffx.36836.1.S1_at	BI969127		0	No Homology to Known Proteins			GTAGTTGGCAGTTAATGTTTAGTTATGGACATGGTGGAGAACAAAAGCCTAGGTAGCCTCCTCTAAAAGCATCGTAATTATGTTAAGAGATAATGCTTCATTGTTGTGTTGCCTGTTATTGTTATATGTTTGTTTCACAGAATTAGGTCATTTTTTTTCCTGTTATGTTACCCTCTTGTTACTCCCCTACCAAAGTCACTTGGTTTGGTGGAAAGATGTTTGTACACCGTTTTATTTTAGCATATATCAACAGGCAGAAGTTTAGACTAATTTATTTCATGATTATTGTTTATGCATGTAAGCTATTAGAGCATCTTCAATAGATGTTATTAGAAACCTGATCTTTCATGCAAGATCTGATCTTGTTAAGATTTGTTGTTGGAGC
GmaAffx.36999.1.S1_s_at	BM093902		0	No Homology to Known Proteins			AATATTGATATTAGATGCTTGTGTCAAATGACCTCGGGAATAGATGCTATGAGATTTTAAGTATTTTGTGGTCTTCGTTGTTGGTTTCTTCAGTAATAGTAACATATGAAGCATTCAAAGCAA
GmaAffx.37270.1.S1_at	BF423921		0	No Homology to Known Proteins			ATTCATCTTCATCAGGAACCATGAGCTCTTTTGCTACCATGACCTTCACAGCAATTTATGATAGAAGCGATTAGTTTGACTGTGACTAGGTNGCCTTGTATTCGGCCCTCAATGATTTTTTCTCCCTCTCCTCCCCTCTATCAAANNTGNCCAATCTTTGCTGCATTTCTTGGTTACATACAAGAGTGTAAATTTGTTTTATATCTTCTTCTCATACTATATTAATCAATGGTGATGAGTTCAATTTTGGAANNNNNNANNNNNANANNTNNNNNCNANNTNTNTNTAAGAAAGGAGTGTCGTTGGTCTGTCTAGGCCATATATCACAGTATTTTGAGTCAGGGGATTGTTGAGTTTTGGCTTGTCTTTTTGTGGATCTTTTGCTGGTCTTTGCTTAAG…
GmaAffx.37663.1.S1_at	AW734686		0	No Homology to Known Proteins			TGATATATGCACAGGTTAGCCTCCANNNNNAATGTGTCACTTCTCTCTCTTATTGTTATCGCCTTGCACTTGCAACATTTTCTTTTTGGTATCACAACTGGATTTGGTTTGTAAAATTCCTTTGAATTCTTCATATTTCTAACAGTATACATTCGTGATTC
GmaAffx.38387.1.S1_s_at	BM525407		0	No Homology to Known Proteins			ATTCAATATCGCAATACGTCAGTAACCAACAGCTGTTGGATCTTATGATTAGGAGTGTAGAATCGCGTAACTATTCTCTGTATGCCACGAGGCCATCCCAACGTTATTACTAGCTACAAAAGGCCAACTTCGAGCATGGAGCAAAAAGTATATGAATAAAAAACAAGGAAACAATNAAAGAAGAAGCAAAACTTCTTCGTCCTCCATTGCCGCGTGTGAATGATGTGTTGATTTGTGTGGGTTTTTT
GmaAffx.38841.1.S1_at	AI965908		0	No Homology to Known Proteins			AAAAGAGGAATTGCGCTGATTACATATGCCAGGTCATGTGGTGTCGATTTTGGGAATTTTGCTTCTGCTAGCTTACAAGTGTGCAGTTACTGTGTATTAA
GmaAffx.39212.5.S1_at	AW423418		0	No Homology to Known Proteins			GTTTCTTATGTTGGTAATTTGTACATTGCTTCTTTATTGCTGTGGAAAATTTCGGATCTGTCATTTGACTGAAAATGAGCTGACGTGGTTTACATTAATCTTTAA
GmaAffx.39568.1.S1_at	AW760030		0	No Homology to Known Proteins			ATGTTTTCCGCCGAGGACGATCATGTGATTTGAACCGTATCCGAGGAAAAGGGACCCTCACTTGATCCAACGTCATTTTAAGGG
GmaAffx.4211.1.S1_at	BG362818		0	No Homology to Known Proteins			TCGAGTTCAATTTGCAATTCAATTGATANGTTTCTGTTATCTGCTATTGAGGATGACTAACGGNTTTNTAATACAGGAAGTTTAGACGTGGTTCAGCGAACACATTAAAAAAATCGTGTTTTTATTTTATATTTATACTGTATCTACAGTTTTTATGTATTTCAGAAATTCAGTATACGTAGNTTTTTATTANGTTATTTTAGTTATTCTTTATGTATACATANTTTTATGTATTTATATCTACTGATGTTTATATTGTTCCGAGACGCATGGATAATTGGAAAATCATGNCNGTTGTCGNTTTNGATGTTAATTGAGCCAAACCAAAATATATTATCAGCCCAGTAAAGTAGTTTTAATCTTTTTTGGTCCCCTCTTAATTGTTACTTTTTCTAGTAA…
GmaAffx.4245.6.S1_s_at	BE059910		0	No Homology to Known Proteins			GATAGCTTGGCCTCCTTGTTCTCTAGCTCTAATATTGGAAAAGTTGTTGTTCAAGTTAATAAGGCCTAGTAATGTGCTTGATCTTGATCTCAATAATATTTCAGCACCAGATATTGAACTCTCTTCCATATTTCTGTCCTTTATTGTAAACTCGTCTAAGAAGGAA
GmaAffx.42925.1.S1_s_at	CA802660		0	No Homology to Known Proteins			TTGATTTGGCTTGTAGTGCCTCTTTGTGTTAGCCTTTGTATGGGATGTAAAACAGTGTCCTCTTGAAGGAA
GmaAffx.42933.1.S1_at	CA803075		0	No Homology to Known Proteins			TCATCTTCTTTTCCCGAGACCATAGTAGAACGTACAATCTTTATTTTCCCCTGAAAATTGAATGGCATGTGATTCTTTCTATTTAACTCCTGTTTGAATGCATCCTTGTAGCAAACCTTTCCTTGATGTTACATCCAAAATTGTGAGCAAAACCTTCTTTTAGCCCTTGAAGAATATACTTATTATTATCAATGGAAGTTGTTCGTCATTTGCATGGAGAAA
GmaAffx.43923.1.S1_at	BE821464		0	No Homology to Known Proteins			AAGAGTTAGATAGGTGTTCCGGAGTGGAATTTATATTTCAAAAGCATGGGAAGTCTATAGATCTTGTGGGTTCGTTCAACTTGATATAGCAACTAANNNCTTATCTTGCTAGGTGAAATCGACTACATGCATAGAAGTTTTAACATACTTAATGAAACTTAAAGGTGGACTAACATGTGCAAGCCTTCTATTAGATTTTGGCTTTCATAAGCTGGACATTTTTCCATTCATCAATCATTCATTTGGGTCAGGTGGCCCTTAGGGATTGTAATCAGTGTCCCTTGTAC
GmaAffx.44321.1.S1_at	BE058464		0	No Homology to Known Proteins			CAGTTGAATTGCAGACTTGGCTTTCATCATATCTCGTTGTGAATGAAAGAGTTCACTGTTTGGAGATCATTTGTTGCAGAATCCAAACTATATGTGCATTATTTGGACCAGAATGCTTTTTGAGGAAGGGATGGGCTTATGTTAGAACTCTATGA
GmaAffx.46481.1.S1_s_at	BM528129		0	No Homology to Known Proteins			GCAACTTTGGTGGTCTGAAGAACTATGCTGCTCTTTTATAATGATCTTTAAATATATCCTCTTAAAATTGGATATCATTTGTCAGTTCAGAACAGTACATTGAGGACAGTGAAAAGTAGAAGCAGATTTTAGGATTCTTGATCCTAGGTGTTTGCTCCAGACCTCATTAGTCAAAGGCATGTAAAAGTTTGAATTGACATTAATGGTGATATTTCCTAGGAATATAATTTTTATTTGAAGGATCAAATTAGTTTAATACTTGTACTGA
GmaAffx.46992.1.S1_at	BU083062		0	No Homology to Known Proteins			TAGTGTATTCAAACTTTTTTCTAGATACAAAAAACAACCTTTTTGTTTTTTCACATTTACCAATAATTCAGTTTGCCTCTCATAGTTTGTTTTATTTATATTTTTCCGTCGGCTTTCGCAATTGTAATACTAGTATCCTATATAAAATTGTAGCCTTATTCTATGCCTTTATAAAA
GmaAffx.48428.1.A1_at	BG839472		0	No Homology to Known Proteins			GCTGGCCTTGGAATTCATCTTTCGGGCAGCCATGTGGCAGTGTGATGGACATTGGTCTCCTCTAGTTTCTTTGCCTTGGAGGGCATAAAATAAGATCGTATCTAGTTGGGANNANNAGGNNTNGNNNNNAATNCNGNNNNANNGTCATCTCAAGTGATAAATTAGTGGATGAGAGCATGTGTCGTTGTTGGATTTNTTGTAGTGGGTAAATTATTTACTTTGACATCGATGCTCATGCAAATGCTGTGTATCGAGAATATGCTTAATCTTACCACTGCTCAGTGGCAATGTGATTATAGACTACNATTATTGTGCAAGAGCTGACCCCAGTG
GmaAffx.4882.1.A1_at	BE820482		0	No Homology to Known Proteins			TGGAGCTACCAAGGCCAGTTATTGGTTCTCTCTCTGACTATAGNCTATTTATTGTCCTANGAAGTTATTTCTGGTTTCATCCCTTGTGNACTTTTTCAGATACTAATGTTNCANCGNNTNTTTTTNCATAACCCTTNGTCGTGGAACTANATNGTNAAAATTGCAGTATTTAGTGTANANNANANNCCAGTNNNGGTATTTCTTAGCGTGCAGGATACCATGGGAAGCATTTATCAGATA
GmaAffx.48948.1.A1_at	AW310566		0	No Homology to Known Proteins			GAGGAACCAGAACCAGAAGTTGTGAAAAAGGAAAAGANNAANAAANGGAAGGAAACTGAGAGTGCTGAGTTGCAGAATGGGAATGNCGATAATGCAGGAGAAAAGAAGAAAAAGAGAAAGAAGCATGCCGAGAAGGAAGAATCTCCTGAAATGCCAAGCAAGAAGAAAGGCAAAAAAAAGAAAAGTGGGGACTAAGGTGAAGTCATCTGCTAATCAATCTGGTGAATGACAACCATTTTTGTATACTCCGGGCAGCTCAGTAGTTTGTTTGGTATAATTTTTGTTTTCATTTTTATGCAATTTGTAGCTTTATACATCCTTTATTATTATTTAATGGGCTTGAGTGGATAAT
GmaAffx.4922.1.A1_at	BI970569		0	No Homology to Known Proteins			ATAGTGGCTATGTTTGATTTTTGGCTCTGGCCTGCTGTGTCCCGAGACACCATTTGATTCATATATTGCCCTCACCACAGAAACTCAGTGGACTTAGTCGTGCTGTTGTAACATTCTTGCCTGTGTCTGGGTTGGATGTTGTGGCAGTCATTGTTCAATTTATATGTGATTCTTTCGAGCGTGTTATAGTACAGAAGATTGTAGTTTTGTGTTAGATGATAGAAATATATTCCTTTTTCTGT
GmaAffx.49400.1.S1_at	BE805470		0	No Homology to Known Proteins			AATATCGTAGATGAATGGCACTGTAATCTGATCGATCTTCTAATGGTGCTTGTCCTCCATAATATCGGGTTTACTACAACAAAATACTGAGAGTTTCCTGAGACATTTAACTTNTNAGCTGANAAGTGAGAACTCCTGAAAATTGTAAATCAGAAAATTTTGTTCATTATCGTGGTACCCCCTCCTGGAGACTACATAGAAAT
GmaAffx.50095.2.A1_s_at	CD417493		0	No Homology to Known Proteins			TACGCACGTTTCTGTTAGGGTTCAGGATTATTACAGTATTAGTATTCTTTTTTTTACCGGTGTAGTGAAATACATTACTGGAGAAGAATAGTGAGAGGAGCATATATATCTATATGTTACTACAGCTTTATTAAAAGAAAAACTCTAGATTGCTTTTGCTTTTCCAATTTATGTTGTCGGTTATGGATACCAAAAAAAAAGGAGGAATGGGATTGTTTGTGGTTGTGGGTTGCGAGATTACATGTGATGATTCCGCTGCAATCTACCGACACTA
GmaAffx.50307.1.S1_s_at	BI424576		0	No Homology to Known Proteins			TTTGTAGTATCCATAACACTGCAGAACTGTTAGGTGCCACTGGAAATTTTTCATATCAAGCATTCCAGTGTTGGGGTATGCAAGTCATTTGTTTTTGTTAAAATACATAGATCTAGAGCAATCAAATGTTG
GmaAffx.50897.1.S1_at	BM177461		0	No Homology to Known Proteins			GATGATCTATAGGAAGTGGAGTCTCCTTACCGGNCCGGTCNCCATTCTCGGCGGCGTAGTCGTCGCCATCGCCGCCGCAAACGTCATCTTCGTCAAGAATGATCCTTTCCTCAAACCAGAGGAGAGGAAGTATGAAAATGAACCTGCTACCAAGTAGGAGAAAAGAGACAACAGAAGTTTGCGTTTTGATGTCTTTTAAACCCTGATTTATGAGCTCTGTATACTGTTTTGCAAGACANGCTCTNGGTAGTTAATAAGATTGAGATTCTGAATGGAGTCTGGACTCTGGAGCACGGGCCCTTAGTTTAGAACTAACCTTCCAATGTTCTAGAAAACTGGTTCATATTTCAGAGATCCTTATTTTTCTCTTCTGTACAATGTCAACTGCAAAT
GmaAffx.51287.2.S1_at	BE820683		0	No Homology to Known Proteins			GAAGCAGCCGCTACTACTAATGATGTGGAAGACAAGCAGATAGATGGTCAAGCTTAAAAGGTCAGATGTTTATTGGAGTAGATGTGGCCGTTCATTTGTGAANNGANCGCACTCAGAATAATTTTCTTTAACACTGCTTTGTCGGCCAAAATTTTGCAATGTGATGTTCCTTTGGACCAAAAGTTTAAAGCAAAACCTGAGTTTTTTTTTTTCTTTCTATGCTACAGCTGTTTATGATTTACAGACCTTAGCATATTTAAGTGGAAGCACCAAAGCAACATCTTTCAAAATTGTATTTGGGCTTAGGGTTATTATTTTATGGTTTACAAATTTCCATGTTGGCAGAGTGATGTTGAGATTCGC
GmaAffx.51412.2.S1_at	BI424433		0	No Homology to Known Proteins			CTTGGCTTGGAGTGGTGGTTCTAAATNATATCAAAGAANATAGCNNTGAGTATAGATTTNNGTTATTCAATCTTGAATNNGAAGNGGTGTCACTCAAGGCTACTATCATTTCTTGTCACTATAGTGTAGATTTATTTCAANAGCNTTGCACAGATNNTGGTTTTNTGTGGTTGAAGATTTCTGCACCTGTCAATGATTANGGGATAAAGAGCNTATTCTAATTCAGGATTCTCNTTTAGGTTTCCTGACAAGTTNTTTCCAAGGAATATACTGTTTCTTCTTAGGAGGACCACAATTCTCAGAGGATGATGCCTCCACTATTTGATTGGTCTCCAGAATATTCTGTTGCCTTATGAACATTNTCCATTGTTTATTTCTTTTGCAGGTCGGATTGGTAAA…
GmaAffx.51829.1.S1_at	BU763894		0	No Homology to Known Proteins			ATATGTACATGTAGTGTGCGCGCTATACTTTACGTATGTTCTTAGTGAGTGGGTTGGGTTCATGTTTTCATACTAATGCACGCTGAGACAGTGTGTGATATCGGAATCTCAGTTGAT
GmaAffx.52057.1.S1_at	CA819136		0	No Homology to Known Proteins			CTACTTTGCAGGCTATACCTACCAATGTCTCTTTCTGGGTACCGCACGTTGAATTTCACTACGGATTCATTTCATCTCCCCTTATTTTATAATACTTCTTTTCTACGGAAAGTCATTGCTGCTCTACAATCTTCTTAGCTCTAAGCTTGATTGGAACGTATATGTTTGTTGATCAATAATTTAAGACACGACTCTTTGCAAGTTATAT
GmaAffx.52493.1.A1_at	AI856188		0	No Homology to Known Proteins			AAGATGTGCATCCTGGTGGGCAACCTTCACATTTTTTGTGTGTTTGTGTTCATTAAAATTCAGCAAACCACTTCTCCAACCACAAGGACCCAATTCACTATGGCTTGCCATATTAGGAATGTTCAGTTTTACTGTGTTTGTATCTGCTGCTTCTGTTATGGTTGTTGTTGAAGCACAGTTCACTCGTATGCAGATAACTGTTATGCTCAGTGCCTTCTTGGCTCTGCTGTTAGCTTAATTAGACAGTTTTCATATGTGTACTTATGTTTCCTTTAGCCATGGCGGAAAAAGTTGTTGTAATCTTTTTATTTACATAATTTCATTCGCATAACAATAAAACGATGTTTGGGTATGTGCTAT
GmaAffx.53445.1.S1_at	BE058743		0	No Homology to Known Proteins			AGTATGCTGATTTCCATGACATTTAAAAGCATTTTATTGACAAGCGGATTATGAGTTGTCATCTGCCCCACCACAAAAGATCTTTTTGTAGAAAGGAACTAATTGTTGTGCCAGCAGAGAACCTTATTTTGTTATGTTATAAGAATATTGTTCTGTTCCCTGTCCCTCCCCTTCTATTATATGCTTTACTGGGATGGGGAATGTTGCAGAGTAATGAATGTTGTTTAGCTTTATATGTTCCTCCATTATGTTTATTCAAGGTTTTATATTTTGTCTCTGCATGCTGCGTGCTTAATTCAACTAATATTCAATCAGGTATGTTGCTGAGGTTTTTCA
GmaAffx.54085.2.S1_at	BQ629483		0	No Homology to Known Proteins			AAGGAGGCAGGAATTGCATGTGCTTGGTAACCAAAACCAAACAAAGCCTTAAGANGTTCANTTTTGGGATGATGNGTTNTTCTCNNAGACANCANCAAAATCCAAAACTGTTNNTTTTTTTNCGTGATCTCTTNACTTTTCTGAACGCCACACAGATCCAANNNNNNTGGCAGAGCTGCTACTAATCACATGCATCTCACTACTTTTCCTCATTCAATA
GmaAffx.5448.1.S1_at	BU549130		0	No Homology to Known Proteins			GTACGAGGATCTTGAAGGCCCTTCTTCAGTTGCACCTCTCTCAGATTTGGAATGCCTGCAGTGGGATGATGACTACTGAAGAACAAGATAAGAGAATTGAATTNNANATNTATATATATATANNNAAAAGCAAGTTTGCAGATCCATGGTTTTTTNCATTGTGGGATCATAAGCATCGTGCATAGTAAATTAGTAATCACGTACCCTTTTTTTTNGTTGGATTTTTAAAACAGTCTTCTACATACTGATTTTAATTATCATTATAAACATGATCATACACATCATTAGGACATCATCATAGGGAAAGTTCTTGGGTACACATACACTGTATAGATTTATGATATCCAGGCCTTTTCGGTGTTAGTT
GmaAffx.54802.1.S1_at	BI425255		0	No Homology to Known Proteins			TTCCTTTCCTTATTAGCGAGAGGAAAAAAAATTAATTTAAAAGGCTTCTTGTTAATTTCCCTGGAAACTTCATTTTATTTTCCTCTTTTCTCTTCTTCGCGCTCGTTCGTTCGTTCCTCTGATTATTATTCATCGATCAGAATTGATGATGGAGTCCTCCTTCGATCCAACGGTCAACGGCTCACCACACCTATCCCTTTTCAACGGCCACGATTGAATCGGCGAGATCCGTCGGTCAACGGTCTCTTCTAAGGCGCGGTTAGGTTAGGAAAGAGAAAGAGAAAGAAAATGAAGGTGGCAAAGTCGCGTGTGTGGCAGCCACTG
GmaAffx.55940.1.S1_s_at	BQ627807		0	No Homology to Known Proteins			TTTTTGGATCTAATTCGTCATTTTCCAAAGTTTATGGTTCTCTTTTGTTGCCAAGTGTTGGCATAAACAATACACCGAGTACAATTGTCAATAATTGATATACTCGTTGAATTTTCCACTTATGGAAATCGAATATTGACTCTGG
GmaAffx.56430.1.S1_at	AW734641		0	No Homology to Known Proteins			GTATATCATTAGTATTGCCTCGGCAAAGGTAGTGGAGAACTAGTTTCTTTTGATGTTAATGATGTTGTTGAGTTGTCTGATGTTTTTTTTTTTTGGATTTTGTAACTTATGCTTTGTGTTTGTTGTTGCTAGACTAAATTTTTAGTTCTAGACTCTAGCCTCTTGTTTTGCACATGTATTATGTATATGTATTACCTTTGGTGAATGAA
GmaAffx.56626.1.S1_s_at	CA935145		0	No Homology to Known Proteins			TGCACTATAGCATTTCTGGTTTTCATTTCTGTAACATTTTACTTCTGGATTTTGTCTAAATTTGCATTGAAATGTATGATCGGAGCTTGTGGATTTTGTCTGGATTTGTTATAATCGGAGCTTGCTTTCA
GmaAffx.57065.1.S1_at	AI938354		0	No Homology to Known Proteins			GTCAAGGCAAGTTAGAAGTCTATTCTAAAACCATGAGCAAGAGATCGAGAAAGTGAAAAACCATGTTCATTATTATACTTTTTCATTTTGGTGTAATTTTTTTTAAAATTTCTTGTTTAGCTTTTTGTGTTAAGAGGCATTAGACATTACAGAGTGGGAAGTATCATGCATGNCNTNNNNANANAACTAGTTTCTGTCAATAATTCTACCTTGATAATGGCATGTAACCATAATGGAACAGAGCATTTTTTGGAGTTCAATAATGAGATTGTAAATAAGGGTGCACAAATTTAACTGTGCATCTTTTGGT
GmaAffx.57445.1.A1_at	AW348690		0	No Homology to Known Proteins			GGGTAACCGCTCTCTAACAATGAGATATGGAATAACAGGTAACTTTCTCCAGACATGACATGCTGAGGAGCAGATGCTTCGGAAATAGTCGTGCGGCACTTACGTCGTGGTTTGCAATAAAGATGAAGATATGAAAAACAGTTGTGCTTATAGCTAAAAAGTTAACGTTTCTATGTATATATATTATGTGCATGGAACAGTGAAGAGTTGTACGTATCTAAAGAGTNNAGGTGAACGGATTTATAAACTGGCATGTACTCTGGACATCAATCTAT
GmaAffx.57748.1.S1_at	AW306274		0	No Homology to Known Proteins			TTACGCGCTGTTGAGGAACTTCCGCGANGCNNNNNNNNGCCGGCNAAGGGAGTTGGTGGAGTTGGAAAAACACGAGAGCAACATCTGGAAGAAGNATGATGAAGGGCACCGCCCCAANCTGCAACNGAAGGACNAATAAGGCAGAAGTTTCTTTCGAATTTCAGGACTTTACCACCGAGATTCAATTCAGAAAGCCACCTTTGGTTTTTCCTAATCCAGTTTCATCATGTGACACTAGCAAAGACAACAACAAAGGTAACAAGAAGAAGAAACAGCAGGATCTTGCTCTCGATCTCAAACTCGCTCTCTAGTGATGATCACCAATATCGACCTTCAATTGTATCAGAGTTTTCTCAAATGGCCGCTTATATATATTATTATTCCTGTGCTAATTAACGT…
GmaAffx.59155.1.S1_at	BG511534		0	No Homology to Known Proteins			TTCTTCTATCCACAGCATATTCATTATATATAATAAAAGGTTTGAGTCTGTTTGAGTGTCTCNNNNNNNNNNNNNNNNNNNNNNNNNNNNNNNNNNNNNNNNNNNNNNNNNNNNNNNNNNNNNNNNNNNNNNNNNNNNNNNNNNGGGAAAATTAGTTGTCGCCAGTGATGGCATTTAAATGTATTGTGGGATTTCAGTGCTGTTAGTATT
GmaAffx.59623.1.S1_at	BI699291		0	No Homology to Known Proteins			AGTGTACTTGTGTGGTTCATCGATAAATTCTNTCTTTCATAGTGCTCTGGTTGCTCTNACCTTATAGTGCATTCCTAGGATACTGGAGATCATGAAAGATTGCAAGTATCATTGAACTGGTAATATCCGTGGAGTTCTATATTTCTGGACCTTCGATTTTCAANAGCTTAAAGCCACCTGTCCTGCAAAACCTGTCACAGTTAACTGCTGGAGTACATACCTCCAACAAAGATGTTGGCTGTTCATGCAACTTGCTTATGCTCATCTTCTTGATGTTGGCTGAAATCATGGTTTTCTGTCAGAGAACTCAGCAAGGTTCGATATAAAAGGCATGATCTTGGCAACTAGGTTGCTCCATTTGTTGGAATAGTGTTATTGGATTGCAATTTTCTCATTCCA…
GmaAffx.61669.1.S1_at	AI794709		0	No Homology to Known Proteins			ACAATGCTTTGATGTCTGTGAGCTCTTTTGTCGTAAAATGCTCGAGCGCAGATTCTATGGAGTACGATAACATCGAATTATTGGACTGTGGAAAGACGGAGAATTCCAATCATTGTAATATTGTTGCTCTTGTATGGAACCTTTTAAAACATGTACCACTTATTCGAT
GmaAffx.61861.1.S1_at	BM270636		0	No Homology to Known Proteins			ATGATGACGAAAACAACCGTTTGTTTGTTTGTTTATTCTTAATCAGTTTCTTATCGAAGAGCACCTTCACTTGAGACTTTGGGTTGGACTTAGCTGGAGAGTATTCACATTCTGTGAACTAAATATTTGAAATGCCAGCTATGGTTTGTTATCTTCTCGGTTTGTATTTAGTAGTACTGCATTATTAAATGTGTAAGAATGCTATAAAGCAGATTTGAATGTTTGAAAGTTCCCCAATACAATTAAGTG
GmaAffx.62153.1.S1_at	AW394575		0	No Homology to Known Proteins			CTCTGCCTCAAGTACTGAAAAATTGAATTAGATGGTCTCTGCTGGGTTGGAAGGAAGAACGTGGGAACTGGGAAGTGAAGCTACTTGGTCAAGAATAGTACGATAGTACGTCTAAGAGGTGAAATTGTGTTGACTAGTCAATTAATCAATTAATTAGGTAACAACCACCGTCTATTGTCAGTGCACTGTGACCACATTTGCT
GmaAffx.64621.1.S1_at	BM523229		0	No Homology to Known Proteins			CTTTTGGGTGTGACACGGTTCTATGATCCATATATGTCTCTTTCACAAAGATAAACTTATATGCAGCATAAGATGGATTTGATTGGGGTTTTCATATTAATTGTAGTGGCCCAAGCTTTTCTCTGTAGTGATATTAAGGAGCATTGCTTCATTGTTGGGTTTCAAGCCTGTGATAACTACCAAAGTCC
GmaAffx.65048.1.S1_s_at	BQ628412		0	No Homology to Known Proteins			ACTACAACGGGAACCAGAACCAGCAGGAGTTTGAAGATGAACATGAGAACTTCGAGCCATGAGCTTGGATCATTGGCAAAGTAAAGAGTTCACTATACTTTTGAGTATCCACTATGGGTGTTTAATGTTTTTATTGTGTTTTAGATTCAAGAAAACACAAAGTTAAAGGATATGTTAACTATGAAGGGCTTT
GmaAffx.6512.1.A1_at	CD392631		0	No Homology to Known Proteins			GAAAAATAATGTCTCTTACACCCAGAATGATGGTTGTCTTGTGCCCATGGCCACCCTTCACCGACTTAAGCTGCTTGAGTTGGGATAACTCTATGTACACTCAAGCTTCACACATGGATTCATATTAATGTTAGATATTATGTTGTGATATCCTTTGCCAAGATTAAGAAGCTCGTCTTTGTAATGTGGCAT
GmaAffx.6522.1.A1_at	CD394786		0	No Homology to Known Proteins			TGCCGTTTTGTTAACTTGCGTTTATACGATTGCGTCTTTGTTCGGTTTTGTGGTTGCAGGAAATAACCAAATTGGTT
GmaAffx.65393.1.S1_s_at	BU760770		0	No Homology to Known Proteins			GTTTACTAGTGTGATTGGATCTCCCGTTGAAAACTCAAAGCTATGCTTCTGTTGAATTCACTTTCGCCGAATAATAGGAGTATTTTGAATCTTTCTATGCA
GmaAffx.65609.2.S1_at	AW306365		0	No Homology to Known Proteins			ATGGAGCAAGAGATTCCTCTCCTGAGGATGCTTGAGAATCTTAAATTGTTCCTTTGACCAAAGGGTGAATGGCCAATGAATTCCTTCCTGCACTAAAACTGTCGTGTTGAGGACTTGACACTGTTCCTGGTTTTGATGGAAAATTCATGCGACAGCATTAATCGATGAGCACGTGCTGTCTGTCGGGGATGCTGATCCAAGTCCCCTGGGTACCCTCCTCATCAGTTGGAGTTCAAACAAACTCTTGCTGGGTATCACTTTCCCAAAAGAATGATCCGTCACTCTTCCAGAAGGTATACCTCCTTCAGGTCATGTCCAACACGGTTGA
GmaAffx.65892.1.A1_at	CD406505		0	No Homology to Known Proteins			AGATGAGGAGTCTCCACAACCACCTTCTAAGAAGAGGAAATGAGAATTATACTAGTATGAAAAAATTGTCATCTTCCTGCCTTTTGTAATGCTTTCTAGTTTTTAGTCAAATTTAGTTCTTAGGACAAGGATTTACCAGCTTGGACCTGTCACCCCATGCTTTTATTGTCTAATATCATAACTTATAAACATTAGTATATTCTCATGTTACGATGTTGTTAGCTTTGGAAGGCATTGTAGTCTGTGGCAAAAATGGTTCAGGTCATGGTACTCATTTCCTTTTTCGTTGGGCTTGTAAGTCTGCCA
GmaAffx.6609.1.A1_at	CD411809		0	No Homology to Known Proteins			GGGAAAATGCCAGTGACCTATAGTTGATTGTGTCGTTTGGATGATGATTGCTCCCAACATATATTCTAATATTTTTAACTTTCTATTTGTCTCATTATGTGCCTGGAATTTTGTACAATGGAAGTCCATTTTGTTAATCGACTTCCTGTTATATTTTACCTTAGTCAAATACTACTACA
GmaAffx.66562.1.S1_at	BU760937		0	No Homology to Known Proteins			GCATGTCATGAATAAGTTTGCTACAATAGGTCGATTCTTTTGGGAAAATTTTTCCGTGTATTTTGTAATCGATAATGTTATATATAGGCTTTATTCATGCACTTTTTTTTTATCTGAATAATGATTTGTAGACACCTAATGCAAATCTATACCTTGAGAGAGAGAAATAGAAGAGAGATAATTTGATGAGTGACATG
GmaAffx.67375.1.A1_at	BE659769		0	No Homology to Known Proteins			TTTGTTGGCTGGATTTTTATGTTAGTGTTTCGTGTTCGTGTTCATGTTCAAACATTTGATAATGATATGCGCTGTTTTTGGTGCTGCTTTTGTTTTTACTCATGAATGCGTGTTCTATTTTG
GmaAffx.68418.1.S1_s_at	BI425533		0	No Homology to Known Proteins			GGATGCAGCCTTAGCTGTGAAGTTGTTGCGGTATTTGTTGGAATCGAGACTCATGTTGTTGCTCCAGTTATGTCTTCGTTGGTTAGGACATGCGTTTGAGTTTATTGAGTTTAATTTATAAAATCAGGTTTAGCTTCGCTAGACCATTTTTAAAA
GmaAffx.68432.1.S1_at	BI426680		0	No Homology to Known Proteins			TGGAATTTGAATTTTCTCTTTTGAGGTGACTATTCTAAGCAATTATAAATGTTATGTTGATTTGCCAATGTGGCTTACCTCCAGCTGCTAACTAGTACTGAGTCCTGTATATATGGCCGTTTCATGTATACAATCACTCGTTGAATTGTAACTT
GmaAffx.70056.1.S1_at	BU765705		0	No Homology to Known Proteins			AGGGCACCCTGCTACTGTCCAGTGTCAGTGTTTGTGACTTTTTGTACTACTACCACTCATTCCTTTAATTGTGCCCTTTCATTTTCATTATTTAGCTGCTGCATCCATGCATGTGTTAGTTTTTGAATGTTTCATTTTCGACTTGTGGCCATGGAGGGTGGAAGTCTGTGTCCATTTGATTGTAACATTAACTTGGGTATTTGGACTGTCTAGGTAAGTCTATGTTCTGATAAATTTCATGTTTATGTATAGGTATATATAGGTAGGGTCTGATTCGTCATTTGTGAGGACTGGGTGTCATTTACGTGTGTTC
GmaAffx.70298.1.S1_at	BI698911		0	No Homology to Known Proteins			ATTATTTTTCTCTTGTGCATATAGTTATAACTCTGTACCAATAATAAAGGTAATATTCTTGCGTACTATGATTTCTTTTTAACATTTTAGTATATAAGTGCAGGTAGGGAGTGTCTTTCTTCCGCTAGGTACAATAATGAACTTGGAGAAATTGTTGTTTTGGCTCATTTTGATCACTGATGTATTATTTTTGTTCGCACTGAAAGCAACATATTTGTCA
GmaAffx.70399.1.S1_at	CA936776		0	No Homology to Known Proteins			GAGGAACGACCAGCAGAATTAATTTTTCATTTTTTCATTTTCACACACCAAAAAATAAAACCAGGAACAAGACCTTTGGATTTCGAGGCCGAATTGCCGGTTCGGTATTTTCCCCCCCTTAGTTTATAGATCTTCTTCACGTTGCTAATGATTGCGGTGGGTAGTTAATTAGTAGATTTGGATTTGAGATTTCAGGACAGTCATGTGTTACACTGTTACTGGAGCGAGTCTCGAATCCTTTTGTTATTAATATTTTTTTATCTCATTCCCGTTCTCGGTGGTTTAATTAATTTTATGTTATGCTATTGTAGGAACTGGATTTATGGAGCTTACATGCTTATTAATTC
GmaAffx.70622.3.A1_at	AW349250		0	No Homology to Known Proteins			CCAGTTACTGTACCCATAAGTGATGATGCCAATGATAATAATAAAGCTCAATTGGTCATAATTGGGGATAGAAAAGACGACGTGGAAGCCAGAACCACCACGGTCAATTTATGTGGGCCTTAATCGGATCACAAAGTAATAGTAGTAGTAAAGATAGTGTGACACTAGTCCATGATCAATGTACTGTGATCTTAACTGTACTTGTTTATTAAATGTTTCCAGAGTTGGGTAGTTTTATGCGAATTCTGAGCTTCACCTCCGCATTTTACGAGACAT
GmaAffx.70823.2.S1_at	BU765789		0	No Homology to Known Proteins			CATTTTTTGATTCTTCGTTCCTCCAATAATTCTCTCTTCTACCATTCATTCATTTTATGGTCATTGGCCATGACCCAAACCATGTCAGGCCCAAATGACTGGCTCCAATTCTACAACCAAAATCTCACACCTTCAATCCCTGACTTCACCGTTACTACTGCAGCTGCTACTACTGCTATCGTCGCGGCCACGAGT
GmaAffx.70975.2.S1_at	BG790871		0	No Homology to Known Proteins			AAATTGTGACTCCTTGAACATCTGGTATATACCAAAGACTTCTGATTCAGTTTGGAGAATCAATTNTGTCCTTCCAGATTGGAGAAAGTAAATCCTACATAGCCACCAACAAAATATCATTAAAAGAATCAACCTATATGCTTTATCATTGGTGATTGTTTTTGTTACATTGCGGGCTACTACTACGAGAGTTTTTCCTTGATCTTGAGTCAATTTATTTCAGTTTTATGCTTTGTTTATATTTCTCAGAGTTGGGATGCCTGAGTAATCATTTAGTCGTACATCATAAACCGGGTTCATNACTTTGTTAGATAGCATAATTGCTGTTTTGATGAATGAACAAGATTGAGCGTTTTGAACTTGTTGAGTTGTTCCTTATATATGTATGCATTATAGTTT…
GmaAffx.71413.1.S1_at	BI699409		0	No Homology to Known Proteins			TACTGATATGGTTAGGTCTGGTTCTTGTTCGGGTCNNNNNAATGGCTCTTCCTTCTTTGATAAGCACCCTTCCGTTTCACGGGATCATCAAAACATGGAAGAACATTCAGAACATATAGATGTGGTTAACTGCAAGTTGATTACAGCTAAAGATAATGCATACTATGGTAATGGATATGTCAGTGCAAACGATTCTTCAATGCCAGTTGAAGACGCAGGCACACAATTTTCTGGCATCAGTTCTTTTCCCACTGAAAATGACAAAGGAAATGGAATTAAGAAAGTGGAAATATCAGCTGACATTTAGGTGCAGCTATTTTTGTTATTTCTTCATATCATTTAATTATCCCATCATCGAAATAGGTGGTGAGTTGGGAAATTTTTGTCCGGGGTTTTCAT…
GmaAffx.72175.1.A1_at	BE822067		0	No Homology to Known Proteins			AAGGTAGTATTATGGAGCATGGTAAATGATAAGTTTCTGTTAATAAGTATTAGATATGATAGTATGACATTAAAAAAAATATCTAACAGTTATTAATGGAAAATTATTAGATTACCTTATCCAAATCCTTGATGTATTGCACCTTTTGTTATTTCTATTTAATTTTGTATAAGTAGCAATGAAAATAGGTTAGATTGTTCGGTAGAAGCTTATGGCCTAACCTACATCTGGCCTAAACTAAACCTTTTTAGAAAATAGGTCAAGATAATTTTTTTTGTAAATTAAAGTCTATCTAGTTAAACAG
GmaAffx.731.1.A1_at	AI416901		0	No Homology to Known Proteins			TGGCTGCAGCTGTTTGCTAGAAACAGGGTTGCCAATAATTGACTTTGTTATTACATAATAGTAGAGAGGGGGTTGGTTGGCCTGAGGCATGATAAAACGTGGGTTTAAGCATGCACATTTGATTTTATTTTTTTTTCCCTTGAACTGAACCATTTTTACTACATAGGTTCCGTCTATCGAATCATAGGAAAAGCCAAACACATGTGCCCTCGAGATTATTTGTTATATTGTTATCAATCTTGTAATATACGGTGGCTTTTACTGTATGTATACCTTCAGTCCTTTAGTATGATGAGTATTATCAATTTATAATATAAGGCACTCATTTATTTTTGT
GmaAffx.74003.1.S1_at	BI784769		0	No Homology to Known Proteins			CAGCCATTACTTTAGGTCGTCACGTGAAAATAAAAGNATAAAATACNGTCGATAAACTCTTTTACAAATAAAGTTNNNAANGCTTTCTTTTCAAANAACAAGATCGATCATAAATGCATNCATCATTNAAAGCTGTCCAAAATATGNNAGTTTNACAAAATATATAGTGTCATCCAGAGCAAAGGTGTCCANAGNGNTGGCTTCAGCCACANGTATACAATNATCAAATNCCTATACATCAGGTCTACCCATACAAAANCAAAAGAGTAAACCTAANAGTNAGTCCTAGATACACNCACCCTCAAAAANTATACAAAACTAATCCAAGGAGCTGTCCACTCCACCGTGCGCTGAAGCGTCCGTGCAGGTTTATCTGGATGCACCAAAGAAGTAGCCGTG…
GmaAffx.74624.1.S1_at	BU926261		0	No Homology to Known Proteins			AGCATATGGGATTTCAGTCTTTAAAGCCCGCTTTTACGTGACATCCATCATTGTAATGATTCCCATAAAAAACCCTCATTCTAAAAGTCCTAGAAAGAAAGCATGTGA
GmaAffx.74678.1.S1_at	BM522927		0	No Homology to Known Proteins			CACTTCCTAAGTCCAAAGCGAACCTCTTTTATTTTTATGGCTCAATAATGTGATCCATGAACCTTTGGAAACATAGCAGAACTGTGGTTGAAGCTTGTATTGGTTTCTTCTTGTTATATTTTTGGTGGTTTTAGACTCCCGTGCCTGTTATTGGCTCGCTATGGATAACTATTTGCAAACTTGTGTTTTGTTATTATG
GmaAffx.74830.1.S1_s_at	BG155453		0	No Homology to Known Proteins			ATATTCTTGACTCTTGCATGCACTTCAATCCTTCGTAGCATTAATGATGTGGCCAAGTCATCATGAGCATCATACTTATTTCTTTGTGAATGTAAATCAAAATTATAAGAGAGAAAATGGTGCTTTTGTACTACAGATTACTATAA
GmaAffx.75093.1.A1_s_at	CD407666		0	No Homology to Known Proteins			TTCTATCATTTGTGGCTATTTATTGTGCCTGCAGATTTATCTGTCATAAAGTAGGTAAATATCTGACATGGTGAAATATTTAGAGTTTTTAGTTCTAGTCTCAAGGATCTTAAATAATTTTAAACTTGCAAGCTTGTGGAGAAAAGGTAGCTTGTTATAGTTGTATTTATTGTTTTTACATTAGAGACCATACCTTCAAGTCGGATGTTAATTACATTCCTAGCAATCGAATATTGTCC
GmaAffx.75412.1.S1_at	AW100606		0	No Homology to Known Proteins			TCTCTTTTCCCATGTCAGGATCCTTTAATTATGCTCCCAAATTTGGTGGCGGTGAATCAAGTTCTGACAATCTGTAGTGACAATTTATAA
GmaAffx.75618.2.A1_at	BG510710		0	No Homology to Known Proteins			GTGTATGGCTTCCTGAAAATCTGATTTTTGTCTTTGCCTACGGTCATGGAATTGCTTGCTGGGTCCTCTAAACCAGAAGAATGTTGTCTAAATCCACTTCCATGGTGATTGCATGGTGCAAGGACCAATATTTGGCACTGATGCTGGAAAGAAAAATACAACTGTATATCTGTTTCGGTCAGTTGGTGCTGCAAAGCATTCATTTACTCTTGTATCATAGTAGTTACTAGTTACTGTATAGAGACGCAATAATTCTTTGTAGGATTGGATAGAGCTGCTTGGTGTTGTAGAAAAGAGTTATACTATTACTGAGAAGTTCTTTTTTTTTGTAATCATCTTATAAATCTTAATATAAGGAATAACATCAGCTTCATACCTAA
GmaAffx.75881.1.S1_at	AW598783		0	No Homology to Known Proteins			GACTGTCTTTTTTAAAGATCATCTTGTAGTTGTAACATTAAATAGTAAGTTGCACTGTTGAGTTACCTATCCACACATTATGATTCACAAGGTCTTATGAATGCTAGTTTTGCGAGTTTGTATTCCACATGACTAAAA
GmaAffx.76350.1.A1_at	BE555004		0	No Homology to Known Proteins			GAGTGAGTATTATTAGGTTTGGTAACAAATAAAAAAAAGATTGTGATGGACATTGAAGACCTCTTAAATCAGGGAATAGTCTCGTGAATCATGTTCTCTAAGGTGTAAAATGGCTTGGTATAGCATGCTTTGAAATTCATCACTTTCGGTCATGTATATCGACAGATCTCTCATTCATGTCTTGACATAGTTCTGTAATTTTTACTCCATTGAGGGAAGCATCTTAAGAAATGTGTTGGATCGTTGATACCCATGAGAAAGTGGGTGACTGAATGTATACTTGAGTGTGATATCTGTAGTACTTTGGTTTTTGTTATCAACTTTTGCTTGG
GmaAffx.76350.1.A1_s_at	BE555004		0	No Homology to Known Proteins			GTATAGCATGCTTTGAAATTCATCACTTTCGGTCATGTATATCGACAGATCTCTCATTCATGTCTTGACATAGTTCTGTAATTTTTACTCCATTGAGGGAAGCATCTTAAGAAATGTGTTGGATCGTTGATACCCATGAGAAAGTGGGTGACTGAATGTATACTTGAG
GmaAffx.76438.1.S1_at	BM885487		0	No Homology to Known Proteins			CAATCTCAGAGTTTCAATGGCTCAAATCAAGAACCCCTATGAAAATCAAGCTCTGATTCACCATTCATTACGCCTGAATTGAAGCTCGGAGGAATAGGAAGACTACTGCTGTACACAACAAAAAGAAGAGATTTAATTTGAACCACCCCTTGAATTATTAAGCCATTATTATCACTAGGTCTAATAGAACCCTCTTTTGTCCTTATGTATGTTAGCCATTTTCTTTTCTTACCCTTTTCATGATTT
GmaAffx.7738.1.S1_s_at	BE058056		0	No Homology to Known Proteins			GACAAAGTTGTCTCTGATCTGTACTCTTCCACTTAATGCTATTCCTGACTTTGGAACCAAAA
GmaAffx.7777.1.A1_at	BE209406		0	No Homology to Known Proteins			TCAACTCCCAAATCATGTGAAGACACTGTACCTGCTTATGGAAATATCTCAAAGGATTCACAGCTCTCGAGTAACTAAATTCAGAAGGAAAAGCAGCCTAGGATCAAATCATGATCATGGAGGCGATCAAGTTCAAGAAGAGTGCTAGTCCACAGCCAAAATTTCTTGGACNATATTCCAATGGCTTACCTTCAAGCTAATATGGCATCCTTAAGTCTGATGAAAATAGTTTTAAGTAGTTCACTAGAGGTCGTGAACTTGGTTTATGTAACAGAAGTCATTTTATAGATGTTTTTGTCTTTGACTCTTCTTCCTTTCAATATTTAACCATATTGATTACATACCTTAA
GmaAffx.77770.1.S1_x_at	AW119465		0	No Homology to Known Proteins			GTAGAGAGCTAGTTCAGGTTTTTCCTCGTTCATTTCAGGTGATTGCTTCATTTGTATCCGTAGTTGTATTCAGTATTTATACTTATTTATTCACAAT
GmaAffx.78046.1.S1_at	BM269693		0	No Homology to Known Proteins			GACAGGCTGCCTCTGATAAGTGACAGATTAAAATCCAGACTTGGTCCAAGAAGTGACGAAGGACTGCGAGACAGGGGGAGGTCGAGGTCGAGGTCGAAATCTAGGAGGAAAGGCTCTTCTCACTCCAGATCCCCTGATGCCACACCACCAAAACGATATGATAAAAGGACTTCTGTACCTCGTAGCAGGTCTAGATCCAGCTCTGCATCCGGCCAAAAGGGTTTAGTTTCTTATGGAGATGCCAGTCCTGATTCTGGCTCAAGGTAGCTAGGTATTATGCTCTCAAGTCCCAGCTGGACCTGAAATTGCTATACATTATATTACAAGTCTCAAGAAGAGTTAAGTGTTGCATTAGCTTAAAAACGACCGTTCTATCATGTTACTTTTAGTAAGAGCCAA…
GmaAffx.78069.1.S1_at	BM271106		0	No Homology to Known Proteins			ATTGTGTATATTTAACTGAATTCAGTTGGCACTTGTTATATGGGCTCTCCCCTTTTAGGGGTTTATGGCCTTCTCTTCGTGTTAGTGTTAGTGTCATTGTGTGAATACTTAATACATTAATTGAATGCTTATATTTGTCTTTTCACTNNNNNNNNNNNNNNNNNNNNNNNNNNNNNNNNNNNNNNNNNNNNNNNNNNNNNNNNNNNNNNNNNNNNNNNNNNNATTTCAGTATTTTACACATGGTTAATCTCTGAATGGTTGATTGAAAATGTCTTGTGAGGTTTGGTTT
GmaAffx.78171.1.S1_at	BU551047		0	No Homology to Known Proteins			ATTGATTTCTATATAGTCGAGCAAATAAAGATTTTTGTGCCATGAAAGTATTAACATCTGGGGAGGGAAAAAGTGTGATATACTTCATTTTGAATTATAAATTAATGGATGCACTACAGAGTCAACATATTCAAACCCTAGATGAAGATTATACATTGGTGATTTAAATCTCAGAATCATGCATAGAATCAAAACATTACTTTCTTCTTATCATGTTGTGTAGGAAGGGTAGTATATAGACTTCACTGGTGTGTAAATAAAAAGGAAAATGTTANACAAGATTTAGTCAAAGTCAATTNTTCCCTTTTGTATCTTGTTCTTTTTTAATGTNTGAGAGGGGGAAAAGAAAGGGCAAATATAATTAAATTTAAAGGAATGCATAAAAATTGGTTGAAAGGN…
GmaAffx.78636.1.S1_at	BQ627652		0	No Homology to Known Proteins			GGTGGCTGCTAAGTGCATGGAATATGAGACAATTAATTAAACCTGCAGCATGCATGTGTTGGAGTTCCCTTTCTCAAGGTAGAAATAATAANTCTAGTGGAGATGTAAACTACCATATTTTTAAGTTTGGTGGGTCAGCATAATAGTGATAATACTTCCCTTACTTTTGCTTCTTAGTAATTTACTAGAACGTGGGTTTCTCGGATGTATTTGATGANATATGAGAGCGGTGAATGGTGTATTTTTTAT
GmaAffx.78938.1.A1_at	BU550637		0	No Homology to Known Proteins			TGTTTAAGGCTATTTTACTGTTTTGGATAATTTAGATGATGGTTTCGAGAGGTATTATTATGGGCTGATTAGTTTATTTCTCTGCTCACAGTATGATATGTTTTTTGATATAATTTTGCCAATGGATTTTTAGCTTATTATGCGCATATATGTTAGCCCCTTTTATTGCCATGTGAGTTTTTTGCTAGTTAAGTTGGGATTGTCATCACACTCCTG
GmaAffx.79541.1.S1_at	CD406120		0	No Homology to Known Proteins			AAAGTTAAACTCAGCATGATCTTCTTACTAACAACTTCAACATATAAATGATATAAATTATAATCTACTATTCATATATATCACGGCGAGTTNTTCAAGTTTTCTTGTTAGTAGATTTTGTTGCTTGGCTTTGTATTGAAGCGTTATTTTGCAGCCACTATAAGTGATTTGTA
GmaAffx.80271.1.S1_at	AW156732		0	No Homology to Known Proteins			GTCGGGATCATCTCAAACGCCGTCGTCGTCGAACGAAACGACGCCAGCCAGACTAAACGGTGCGTCGTCTATAACGCCGTCGCGGTTTGGAGTGTATTCACTAACCATTCTGGTCGGTGCTGCTCTAAGCACCACTCTTGGTTAGAAAAATCAAACTTTTTTTTGGAACTTGAATTATAGTTCTGGTCGGTGCTGCTCTAAGTACCACTATTGATTAGAAAAATCAAACTTTCTTTGGAACTTGAGTTATAGTATATAGTAATTGTGAACACTTTTATGTATTTTTTCTAATATTTTTACTTGGACAAATGAGATCGCGTCTCATAATTAATTTTATGTCGTATAATCTGTGTATCTATGGTTACCAATG
GmaAffx.80351.1.S1_at	BG156741		0	No Homology to Known Proteins			AGTAGTGCTGATAGGAGCTGCATTAATCGATTTTGTTGTTGCTGATTTCAATTGGNCTGCGGCAGTATAGAAGAAATCAACGATGCATTGGTGTTTACCTGGCTTGATGGGGTGACTGAATATGCCTTTAGAAGTTTTAGGATTATTTCTAAATGTGTTCCTACATGCAGGTCCCTAAAGCTTACTTCCTGCTTCTAGATAGTTGGTAATCTTATCTGAGGGTAGCTAGTACCATGGGAGAAGTGGCAGTAATGCACTCTGAGCCTCTGCAGTTCGAGTGCAATGACATTACTGTGAATATGACTGAGAAGGAAGTGTATCCTCCAGAATCAAATGTGGATCACTTGCCTGGAGAAGAATCGAGTCAATCAACAGACCACAAAAATATCAATTACTTGC…
GmaAffx.8096.1.S1_at	AW156218		0	No Homology to Known Proteins			TGGCCGGAAGACTGTGCACAATCACAAACCACGTGAGAAACGGGTGAGTTTTAGCCCAATGGAAAATGAAGAAATTCATGTAGTAGGAGCTTCTCAATAAGGTTACTTTCTTCCTTGTAATTAGTATTTAAGTAGAAGCAAAGTCGTGACCAAGGCAAAAATGCAGAAGCAAGAAGCTAGCCGGAGCAATAACACTCTCATAGGTTCGTTTTGGTGCGTCTGAAGCATGTTAATTTTGTTCTGTAATTAATGTGTAACCTACTTCACTATGAGAGCAG
GmaAffx.81061.1.S1_at	BI317366		0	No Homology to Known Proteins			GTATGGCCTCTCACTACAGTTGCATCATCTTGGCTTTTGTCATTGCTATTTCCTTTTCAAGCATTGACATGGCATTAGCATCACGCAATCTCCTNCAGACAACATTGCCAACTTTGCCTCAGGGAAATGTCCCTCCTTTGCCTGTTTTCCCAAATCTTCCACTGCCACCTTTTTCCTTCCCCAATATTCCTATTCCTAAGATCCCCAACATTCCTAACATTCCCTCAAACCCCATAATT
GmaAffx.81610.1.S1_at	BG154885		0	No Homology to Known Proteins			GACGAGGCGTGATCCTGAGTCATGCACGACTCAGGTAAATCGCATAGCATTCTTTTGTTTATTTTGAGTTGTAACAGTTTTGATGGGTCATTTCTTTTGGAAGTTGGAAACATATTGTCATAGTTTAATTAATTTGTATATCTGCATGTTTCT
GmaAffx.81692.1.S1_at	CA937041		0	No Homology to Known Proteins			GGAGCTGTAACCCATTTTTTAATGCTAATATAGTGATCCAATTGTGAGTAGTAGATTTTTTTTCTCTATGTGCGGATAGTACTTAAAGATTGTATTTTTTTTTTCTTTTTTTTCTTACTGGGTCTGACTCTGATTCAGTTAGTGATTTAGTGCANCNNCGTACTTTAAGTTTCTGATTTATTTAATTGTTTGATTTCTTTTTAGTGATCTTTGNTAGTGNATAATTTNGCTATGCTGTTTTGGTTCTTTTGATTTCTCAGTTTGATTGAGTAGGCTTTAATGGGTTTGTTTTTCTTGTGATGGTTGTTTCTTTAATCAAGAAGGTGGTGTTGTTGCTATTTACTAAACCATGAGTGGATCATGTATTTGTTAGCTTAATTGAATGCATCTCTTATTCTG…
GmaAffx.83872.1.S1_at	CA819826		0	No Homology to Known Proteins			TTGTCTAGGGCGCTTTTCCACAAAAAAATTGTGGCGGTAATTTCAACTTTCTTCAGTCTGTCAATGTTACCGTCTGTTGCTAAGCATGGACCTTGCGAGTTACCTGACATCGGAATAAAAATAGGCTTAATATGCCATTACGTCGGTATAAGTATGTCAATTTTT
GmaAffx.84401.1.S1_at	AW311519		0	No Homology to Known Proteins			GGCACCAGGGCACCAGGTAGATTTTACGGGCATGATTCATATGGCATCCTGAGCTTTGTGTGCACGAGTATAAGTCTCCATTCGAGGTTTGAAACGTTCTTTCTATCCGCGTCTCTTCTTGACTTTGGAACGC
GmaAffx.84483.1.S1_at	AW100747		0	No Homology to Known Proteins			GAAAATAGGACTACAACTGTTTCCTAAAGACATTTCTTTCTTAGGATCTGCTATTCTGATCCTGGCATTGATTCTAATTGATTTTCATTGCTTCTTGACTATTTCTAAGCCTTTAA
GmaAffx.84557.1.S1_at	AW156713		0	No Homology to Known Proteins			ACAAAAGCTATACCGACTTTTTCAGTTTTCTGCGTGTGGTACACGTAAGCATGACTTCATCGTGTAGTTTCCACTTTTTACTTTCAGACTTTCATGATGTATACTTCTA
GmaAffx.84855.1.S1_at	AW459549		0	No Homology to Known Proteins			GTAACAAAGTGGTTTAGACATCAATAGAGGTGGTGCTTAATTATCANATGTTGCGGTGCATTTCTGTGTGCATCACCTCGTTACCTTTGACTTGTTTTGAGAGTACCATGAGAATC
GmaAffx.85220.1.S1_at	BE022901		0	No Homology to Known Proteins			GGGCCCACGATACATTTATCTCCCGATCAATCACAAAAATTAGTTAACTTATCGGACCTTTTACTTNNCTTCAAAGAAAAATACTCAGAATAAGGGCAAAAAGAAAAAAAAAAAAAAAACGTAAAAAGAGGTGCAACACGAGGACTTCCCAGGAGGTCACCCATCCTAGTACTACTCTCGCCCAAGCACGCTTAACTGCGGAGTTCTGATGGGATCCGGTGCATTAGTGCTGGTATGATCGCACCTGATAAGTATTGCACAATCAATTACTATATTCCTTGTGCCTGCCCGGACG
GmaAffx.86081.1.S1_at	BG041479		0	No Homology to Known Proteins			AACGGAATTCTATCTTGCCTTGCATATTGGACGGACTGCCTGACCCATTTGCCAAATCAATATCCAAAGTATTTTGGCGAGTATGAAAAATATGATGATGTGGATGAATCAGCTTCGGTATATTTTGATCCAAGTGTGAAGTGGTGTACTTACGATAATGATTTCTGAAAAGGAAAATATGTGTACAAGAACGGACCTACAAGTATTAGGCTTTGGTTATTTGTTTTGGATGGGTAGAACTTTTCAATCTGAGTCATACAGATTTCATAGGAAACAGTTGAAAAAATATCTTAAAACATAATCTCGCATGCTGGGCTTGCGTTTAAAAAATCTA
GmaAffx.87741.1.S1_at	BQ613105		0	No Homology to Known Proteins			ATGATATGAGTAACCACCACCCTTTCTTCTCACCAACTTCTCGTTCTTCCTCTCATGCTTCACTTCCAGTTTTTGGTTCTTCTTCCTACAAGAATAGTTCCCACCATCGTGAGAATCATTACCCTTTTGCTCAAGATTGGCCTCAAGATGAACTATTCATGAATGATGATGCGAGCTCACAAAGCTCAATGAACTCCTTCAAGTGTTTCAATCTCAATTGCTGCGACCCCGGCAATGAAGATGAGCATGATCCAACTCTAGCACTAGGAGCAGAACACCTTTTCTACACACCAAAAGGCAATGAAAAGTACACAAGATTTTGTCCTAGAGA
GmaAffx.88411.1.S1_at	CA820153		0	No Homology to Known Proteins			GTGTTTTCAGGTCAAATTCCCCAAGTGGCAGGCCTTGATCACACACATTGCCGCTGTTTGTGATGTAAGATGAAAAAAGAAAATGAAAGAAAGAAAAACAGAAGAAAGTAACAATTTCCTTTTTTGTTTCTCACCATCCCTTGCAATAAAATCATTATGTATGCTTCTCTAAGCCAGCTAAAGGTTATGTTGGCCGAGTTTGAGCAATGTAACACGGTTTTGTTGT
GmaAffx.89191.1.S1_s_at	CK606438		0	No Homology to Known Proteins			CAAACTAGGTTTAACGCACTACTTGGATCTCTGTCTCAT
GmaAffx.89191.1.S1_x_at	CK606438		0	No Homology to Known Proteins			AGCATTGTTTTCAGCTAAGAACATAAGACGAAATAAAATCCAACAAAATGTATCAAAACATCAAAAAGGAGAGACCAGTGCCACNAACAACTGGGTGTCCTATTTGACAACATAAGCAATTGTAAAAGCAACGGAAACAAACTAGGTTTAACGCACTACTTGGATCTCTGTCTCATCTTTCGGCGCTTCCTCTTCAGCCTCCTCATACGCTTCTTCTTCCACTTGGCCCTCATCGCGAAAAGAAAACAG
GmaAffx.89512.1.S1_s_at	CK606530		0	No Homology to Known Proteins			GTTTGCTGTTATGTTTTTCTGCCAAAGCAATAGCAACAAGAAACCTTGCTGGTTATGCAGATGAAAAGGGTCCGAGTAGGAGACTCCTTGGCCGTTCTCCATGCAAGAGGGGAAGAATGACTTCTGAAGTGGTTCAAGGAGACAGGAAGCAGCAAAGGGAGGACAGTCCACGTTGCAACAATTATCTGTGATTTGCAGGCTGGGGTTGTTTGTATGTGTTGCAATTGCAAGGATCNACTACACGAATTTTTTTNNAATAAAATGGACACATGAGATGTCACTGTTTGTTGGTTTAGTTTCATGAAATTTGTGTTCACAGAATTTCTCTCAAGAATAACTTTGAGATATATGATCAATTTAAGGATGGGTGTGGGTAATATCTGATTTTTAGAAACGGGT…
GmaAffx.89657.1.S1_s_at	CK606067		0	No Homology to Known Proteins			TCAGAGTTTAGAGGAATACGCATGCGCATAGTTTTACTAATGTAAGTAGAGTTGATGGAACATGTTCGCATTGTGTGGTTTAGGCATAGGAGTGGATGAGAGAAAATGAGAAGAAAAAAAAAAAATGGGTAGATATATTTTCTTCTGTTTGATGGTGGGTACTGGGTAGCGAAGAAAAT
GmaAffx.89772.2.S1_x_at	CK605863		0	No Homology to Known Proteins			GCCTGTGTTGACCTTTTATCTAATAAATGCATCCCTTCCAGANNTCGGGGTTTGTTGCACGTATTAGCTCTAGAATTACTACGGTTATCCGAGTAGTAGATACCNTCAAACAAACTATAACTGATTTAATGAGCCATTCGCAG
GmaAffx.89772.5.A1_at	CK605781		0	No Homology to Known Proteins			TACATGCTTAAAATCCCGACTTCGGAAGGGATGTATTTATTAGATTAAAAACCAATGCCCTTCGGGGCTCACTGGTGATTCATAATAACTTCTCGAATCGCATGGCCTTGTGCCGGCGATGGTTCATTCAAATTTCTGCCCTATCAACTTTCGACGGCTGGGTCTTGGCCAGCCGTGGTTACAACGGGTAACGGAGGGTTAGGGCTTGACCCCGGAGAAGGAGCCTGAGAAACGGCTACTACATCCAAGGAAGGCAGCAGGCGCGCAAATTACCCAATCCCGACTCGGGGAGGTAGTGACAATAAATACTGATACAGGGCTCTTTTGGGTCTTGTAATTGGAATGAGTACAATTTAAATCCCTTAACGAGGAACAATTGGAGGGCAAGTCTGGTGCCAG…
GmaAffx.90082.1.S1_s_at	CF805807		0	No Homology to Known Proteins			AACAGGAGGATTGCAGAAGTTGCTTGAGTGGAACTCGAGCTTGGTTGGATAATATATTCTTTTAAAGTTCAGACATCGTGTTTCCATTTTTCTTAAATTTGAGTATTTTGAATTTTTAGGAGGATGGTTTTGCTCGCATCCTCCTCTTGCTGAAAACTTTGTAGGTAGGAATGATATAATTTTGCATGCTAGGTTCTCTACATGCCATTGTCAAACGGGAATACTCATTTGTTTTCTTGT
GmaAffx.90644.1.S1_at	CF806369		0	No Homology to Known Proteins			TTCATATTCATATAAGGGTCACTTGGTACACCTACTAGTAGAATTTGTCATTTATATCTTGTCCCTGTTTGCAAGAATGCTACGAAA
GmaAffx.90874.1.S1_s_at	CF806599		0	No Homology to Known Proteins			TAAATCTCCACCTCCTCCCCACAAAGATCCATACCATC
GmaAffx.90917.1.S1_at	CF806642		0	No Homology to Known Proteins			TGATCGTAACTGTTTCATGTGAAATAATCTTGTTTAAAATAGGGATAATAAATGTGTATTCAAGTTGCTGTAGTAGTATTTGCATGTCGTGCAAACAGTACTATGCTACTTGAAAGAAGTTGGTGATTTTATGTGTTGTGTGTTGTCACGATTGGACATCTTAGCATAATGATGCCAACAAAATAATT
GmaAffx.9183.1.S1_at	BI425067		0	No Homology to Known Proteins			AAAATTCCACCGATCATTTAAATTGTAATATTCGTTAATTTCTGTCAAAATGAAATCCGACCGTTCGGTCATGCCGTAACCACGTTGGAAACCAAAAAGAGGCAAAATAATAATATAATAATAAAAAAATATCTTTTAGTAAAATAAACCAAAAAAAAGCAATCGGACGTTTCTCTTTGGGATTTCTCTTTCTTAATTGAATTGATTAATAACTAAAGTGAAACTAAGGCTAAAATCAACTCGCAAAGTCAAGCTCGTCCGCAAAAAATCACTAAAAAGGATTTTAAGGTTCGATACTTCAGTTTTTCTCACCACG
GmaAffx.92383.1.S1_at	CF808108		0	No Homology to Known Proteins			GTATGTACTTAATTAATGCAGATCACCTGCATGTGCATGTGTATTTCTGGTTCATTTAGCCTTCTT
GmaAffx.92778.1.S1_x_at	CF808503		0	No Homology to Known Proteins			ATTACATCACCCAATGAACTTTCAGTGGTTTCCAATCAGATAGCTCCCACAGAAATTGTGTATATATACTTGTTGTAAGAAA
GmaAffx.92956.1.S1_s_at	CF808681		0	No Homology to Known Proteins			CGGTAGGATTTGTTTTCATGGTCTACGGGTCCAGAAATGTTCCACAGCTATTCTTCATAGAACACTGACCCCGTAGTTACCCAAGTGCCCAGGAGACAGAGGAGTTGATGGACGTTTTACTAAGAATGTCCCGAAAAAAGAAAAGAAAAGAAAAAGAAATAGTGATTGTTCATCCATGTAATCATATACAGTGATTGGTTCTGACTATTAGTTAGTCATTGGCTGCCTACCC
GmaAffx.93031.1.S1_x_at	CF808756		0	No Homology to Known Proteins			TGCCATCTCAAACCTCAGCTGATGACAAGTACGACTATTCATCTCCTCCACCACCAGAGAAACCCTACAAATATAAATCACCACCACCACCAGTTTACAAGTACAAATCCCCACCACCACCACCACCTGAGAAGCCCTACAAATACCCATCACCACCACCACCACCAGTTTACAAATACAAGTCACCACCACNNCNCNANAAGTACCCTTCTCCTCCACCACCACCTAAAAAGCCCTACAAATACCCATCTCCTCCACCTCCAATTTACAAGTACAAATCACCACCCCCACCATACAAGTACCCATCTCCTCCACCACCACCTTACAAGTACCCATCTCCACCACCCCCAGTGTACAAGTACAAGTCTCCTCCTCCACCAGATTACAAGTACAAGTCAC…
GmaAffx.93214.1.S1_at	CF808939		0	No Homology to Known Proteins			CAATTATATACAGTATACTGCGTGTAATGTTTCTCCATAAGGCAGTTTGAATTCTGTCGTTATCACTTATGATTAATT
GmaAffx.93422.1.S1_at	CF806182		0	No Homology to Known Proteins			GTCTCTCTCTCGTGTGGTGTGTGGTGTTTGCTGTGCTCTCCTTTTCGTTATGCCTTTTATTATTACCTATCTGTCGCTCCACTCCGTATTACGACTCTGGATCAGAGGGATACATCAGAGGATTCGCTCCAACTCCTATCGAATAAGGTATTATCTGTCAATTTACATTGGAAAGGGTTAGGATATTGAATTTTACATAATTAAAGATAAAATCAACGATAGCTATAGTTTTAAAATTAACCATCGATTTAGTTGCAACTGGAACACAGGTTTCTTTCAATGAAATAATATTAATATCAATTTAATAAGCTGGTAATGTAAAATACTGCTAATGTTAATATGAAGTTTGGATGGTCTTATTGGCAGAAGATGCTAGGTGGTGTTCATCAATATTCTGAA…
GmaAffx.9540.1.S1_s_at	BM092247		0	No Homology to Known Proteins			TTTAATGGCCCCACAAACTGTGGAGACCCTGCTGCTTGCTACACTTCATTTATTTCCTGAAGTTTGGATGCATGTGTGAAATTTGAGTTGGAAATAATATTGAAATATTTGTGGCTTTTCTTCAA
GmaAffx.971.1.S1_at	BG237894		0	No Homology to Known Proteins			TTCTCATTGTTGCTGAGTGAATGCTTTTTTAATTACTATTGGTTTTCTGTGTTTTTAAGACTGACCTGTTGAGTTATTAATTGCTTACACTTCATGATAGTACTGAATGTGTTAATACGTAATGCGACTACTAATTACTATGTACTTGGCTGTTATATTCAAGATCGTGATA
Gma.10855.1.S1_a_at	BU550914	At4g00660	0	Post-Transcription			CACAGGGTTGGTCGTTCAGGGAGGTTTGGGCACCTNGGTTTAGCAGTGAACTTGATTACCTATGAGGATCGCTTTAATTTATATAGGATTGAACAAGAACTTGGAACTGAAATAAAGCAGATTCCCCCACAAATTGATCAGGCAATTTATTGCCGGTGATTGGC
Gma.10855.1.S1_at	BU550914	At4g00660	0	Post-Transcription			GTGATTGGCTGTAAATACCATGGTTGTGTTTACCATTGTGGCTAATAGCAGTGGTTAGTGTGACCGTGGCTAAAGTAGGTGCAAGAGAGGATTTGCAAAGCAAGTGACAAATTCTGTATTAGTGGACCCTGGTATGGGAGGATGCACTGTCGAGAACTGGGTATTATTGGACCCATTANTTGAGTGCTTTCGGATTAATTCCAGTTTGGGTTTCTGTTGATTACATTTGNNNAACGGNNNANNNTTNNNAANNNNNNNANANNNNNTNNNNNNNNNNNNNNNNNNTGTTGATTACATTTGCAGATCGATCATTT
GmaAffx.65020.1.S1_at	AW101190	At4g38680	7e-33	Post-Transcription			ACGCGCGAAGGCTGTTGATGTCACTGGCCCCGACGGCGCCAGCGTCCAGGGAACCAGACGAGGCGGTGATGGTGGCCGAAGCTATGGCGGGGGACGAGGAGGTGGTGGAGGTGGCTACGGTGGAGGCGGTGGCTACGGTGGTGGTGGTGGCTACGGTGGAGGCGGTGGTTACGGTGGTGGTGGAAGAGGCGGTGGAGGCGGTGCTTGCTACAACTGTGGTGAATCGGGACATCTGGCTAGGGATTGC
Gma.13038.1.S1_at	BE822071	At1g45976	3e-90	Post-Transcription			GCTCTCAAGTTCAACCTTCAGCAAGCNTATGTCCAAAGCAGAGATAGTAAAGAAGGATGTGGTGACAGTGAGGTCGACGATACAGCTTCTTGCTGCAATGGCCGTTCCCTCGATTTTCATCTGCTTTCAAGGGAGAACACCGACATGAAAGAGATGATGACATGCAAGGCNNGNNGAGTCAATGAAGTGACCATGGTTTTGTTACCNTTGTAAGCATCTTTGCCTCTGTAAAGATTGTGAAAGTAAGNCTTAGTTTCTGTCCTNTATGTCAATCCTCCNAATTTATCGGCATGGAGGTNTANATGTAACTGCNAAGTATACTTCTACTTGTGAAATCTCTAATTTCATGTTTTTATTATGTGTCCTTTCATGTAGNTTGTGTNTCAAGGACCATGACNC…
Gma.16181.1.S1_at	CD409246	At2g28600	3e-70	Post-Transcription			GAAGGTGCTTAGTCATCAATTTTTTTATGTTCATTCCGTCTCTGCGGCTCATGATATCAAAAGATCAATTCCTTTTACTTTGGAATTTGGGCTGGGAGCTGAGTGGTAGGGATTGTAGGTTTCCTATGCTTGGAATTTGGAAACCTTCACGTTAAGAATCCCATTAAGAAATTTTTTGCAATATTATCTCTGCTTCTGTTTCAAGACTGTATTTTACTGTAATCGAATGAGCTTC
Gma.15106.1.S1_at	CD411452	At3g04610	4e-71	Post-Transcription			GCAAACATCAGCTACATCCGTCGAGCTAGTGGAGCAAGTATTACAATTCAGGAGACCAGGGGTGTGCCAGGAGAGATGACTGTTGAGATAAGTGGTACTGCTTCACAAATACAGGCTGCCCAACAGCTAGTGCAGAATTTCATGGCTGAAGCTGCAAGTGCGGCACAGGATCATATGGGGGGTTCAATTAACCAAGGTTACAATTCCTATCCTACAAATCCTGTCTATGCATCTCCGCCCTCAAGTGCTGCTGGTCATGCGGGCCATGCACCTTCTGCAGATTATGGTTCCGTTTACGGCACCAATTATGGCTATTGAGAACATTACTTTACATTCAATTTTAAATGAGGAGCCCTACGTTTTGTAAACATTGAGAGTTCAATTTCAGTTNTAGTTCTC…
Gma.3943.1.S1_at	CD396571	At3g04610	1e-124	Post-Transcription			ATTCCTCTATCTTATGCTGATGCTGTTATTGGAACAGCTGGAGCAAGTATAAGCTACATCAGACGAGCTAGTGGGGCTACTGTTACCATACAAGAAGCAAGAGGTGTTCCTGGGGAGATGACAGTTGAAATCAGTGGAACTGCTTCTCAAGTCCAAACAGCACAGCAACTAATACAGAATTTTATGGCTGAAGCTGCAGCTGCAGCTGCAGCACCAGCACAGCCGCAAACAACTGTGCCTGCTGCAGACCAAGGATACAATTCTTACCCTGCCCATGGTTCTGTCTATGCCTCTCCTCCTTCCAATCCTGGACATGCTGGAGGCTATGGCTCAGTTTATGGTGCAAACTATGGGTACTAAGCTGGGCAGAGCAACTAATGCTGCTATTATTGAAATTTA…
GmaAffx.30043.1.S1_at	AW099862	At2g21660	2e-29	Post-Transcription			TGGTGATGGTGGTTCTCGCTACTCTCGCGGTGGGGAAGGCGGTGGATCCGATGGAAACTGGAGAAATTAGGCATATGACCCTGTAAATTAGGGTTTATGATTAAGTTCAATTATTTTAAGGTGTTGTCTGTGTGTGGTTTAAGTTTCGGTATCTGTGTTGGTTTCGTTTCGTGTTCCTGTGGTTTTCGTTTTTGACCTACAATTCTAGTTGTGTTTATAGTCGATCGAATGAAATGATAGTAAGAAATTATCGCATCAAANNTNNANNNANNNNNCNNNNTGTTTGCTGGANNTGGAAATCGAATTGGATTAATGGTGATGGTTCTTAGTTTACCGGATTCGGTAAATTGTATACTCAAAACGATAAAAATCACTAATTTATTTTTTTAAAATTGGCAT…
GmaAffx.23435.1.S1_at	AW349191	At1g60650	4e-06	Post-Transcription			GTTCTCGTTCATCACTTGATCGCTACTGATTTCTACTGCTGATGTTTTTAACGGGAAATCCAAATGCAGAAGCCACATTAGAGACCTAGTTCTTGTTCTTGTTACGTAGGACATCCTGTTTGGGACAACTGCTACTGCTAGATTGTAGTTTCATAGATTGTGGATTTCATAGTTTGTTTCCTTATTTAGATCGTGCCAATCCCTGTT
Gma.7065.1.S1_at	BQ297832	At1g17370	1e-44	Post-Transcription			ATATCAAATACTTCCCACTGCAGGGATGAACCAAGGGTATTCTCCTGCGGAGTTGTTGGCTTATCAGCGCCAACTGGCCTTGAGTCAGGCTGCTGTATCTGGTCTTTCAGGTCAAACTCTTCTGCAAATGACTGGACAACATGGCCTAGCTCCAGCTTCGATGGGCGTAAACTCTGGGGCATCTCAAGCCATGTATGATGGATATACCGGTAATTCATCGAGACAGCAGCTTATGTACTATCGTTGACACACTGGCCAGCGCAGATTCACAGTTGCATTGTTATCTTCTGGGGGCTTTGATGTGCATCACATTTCTCTTTGCTTCCCCACAGCATGTCCTTTTCATACTGGGCTT
GmaAffx.11747.1.S1_at	BE822429	At4g16830	2e-12	Post-Transcription			GGGATTCTGGGAATCACTCAGAAAGACGTGGTTATGGTGGACCTCGTGGGCCCTACCGTGGTGGTGGTGGTGGTCGCGGTCGTCGNGGAGGTTTTACCANCGGTGAAGTTGGTGAAGAAGGACGCCCAAGAAGAGCATTTGAACACCACAGTGGGACTGGACGAGGAAATGAATTCAAACGGGATGGCTCTGGACGTGGGAACTGGGGTACACAGAATGATGACATTGCTGTGGTTACTGAGGAAGTGGTGTATGAAACTGAAAAGAATTTTGCTGATGAGAAGCCTGCAGGCGAGGAAGATGCACCTGAAGGAAACAAGGACTGTCCTTTTTTGTCAATTTTGGGTTCTCTGATTTGGACTTGAGCAGGAAA
GmaAffx.8086.1.S1_at	BE657368	At2g23350	0.0007	Post-Transcription			CAAATGTATTCCAGTCTTCTATTGAAACTTGGAAAATTCTTCGTTGACAACTTACAAGATCACACAAAATTCTCAATACAACATAGGATACGAACGAGTAAAGAAAAAGAAATTCCGTCAAAATTGAATACATATTTCACCACAGACTGACTTAATCAATACAAAAAGATGCGAGACACAAAACGAAAAGAAGAAAATAATTGAAAAGTGCTACAAGAAGTTCATGATTTACTCTTTAACCCAACCAATCCAGAAGCTAGTAGGAATTTCAACAAAGTACAACAACATCAGGACCCTTCTGGTCTTGCATGCAGCCAAGAAAGGTACTTACAGGTGATCGTTATTGTGCCACATGAACTAAACAGATCTCGTAGTTATTTATCAGTAACATCATCATCA…
Gma.16282.3.S1_x_at	AI900989	At1g43190	1e-126	Post-Transcription			TAAACTTCTCCGAAATAAGCCAGATCATGCACTTATCCAGATGGGAGATGGTTTTCAAGCNGAATTGGCNGTACANTTTCTGAAGGGAGCCATGTTGTTTGNGAAANCGATTNGAGGTCAACTNNTCNAAGCATCCNAACATAACCCAAGGTGCTGACACACATGAATACATCAATTCAAATCTCAATCGTTTCAACCGTAANGCAGCCAAAAACTACCGGTANTGCTGCTCCCCAACAAAGATGATCCANTTGTCCACNCTCCCNCAAGACATNACNGAAGAGGAGATTGTGAGCCTTNTNGAGGANCATGGAACCATTGTCAACAGCAANGTCTTTGAGATGAANGGNAAAAANCAGGCNCTNGTTCAGTTTGNGANTGAGGAGCAGGCTACTGAAG…
Gma.7856.1.S1_at	BI971143	At1g43190	5e-07	Post-Transcription			TTTTTTCTCTTTGAATCATTTATCTTTTCATCTCCATTGCCTCTACTAGATATTTAGGTTTCTAACATAATATTGTGGGGCAAGCTTTATTATTGCAGATGGATGTAGTCTTAAAGAATAGAAAAAGGAGGAGGGAAGTTACTACCTTCTTCGGGGTTGAGGGATTGCCTTAGGGTTTTTTATAATGATTGTTGTATATTTTCTGTAATTCAGGCTAAGTAGGCCTTTTCTGTTGTATTCTCNATCCATTTCAATTTTCTTGTCCAACTAAGTA
Gma.12187.1.A1_at	AW734314	At1g66260	8e-12	Post-Transcription			GAGAAAGGACGCTGTTGAGAAGTCAGCGGAGGAACTTGACAAGGAGCTGGAGACCTATCATGCTGAGGCCATGAACATCTCTTGATCTCGGAAGCCNCAGTTTATTTTGTAATATTACTTAAGATTGGCTTCCTTGTACNAAAGCTCGTTTCCTTGGCGTTTACTTTGAATCTCTTACTGCTTGGTGCTTTTAAACATGCCATCCTATTTGACCGCATTTAAGTCTTGTTGGAGGC
GmaAffx.15743.1.S1_at	CA802922	At3g62310	4e-43	Post-Transcription			GAATTTTATTCGTACTGTTACAGACATACGTGGTGAATGGTTGGTTGATATAGCACCACATTACTATGATTTGTCTAATTTCCCCCAATGTGAGGCAAAACGTGTCCTTGAGAGACTTTACAAGAAGCGAGAAAAGGAAAAGGAGGAAGCCAGGAGCCGCAGATGAAGTCATAGCTGTCCACACTATTTTTGCCTTCGGATTTGGATTGGATATTTTGCCTTCTGCAGCTGAGACTTTCATGATTCCTCGTGACACTTACCTTGTAATATCCTTCACATCCGAAAGGAATACTGAATGTCGATAGTTTAGTTCAAAATGAGCTTAAGTTCCTTGTACCATTGCTAGAGT
Gma.5765.2.S1_at	BM526581	At1g14220	2e-09	Post-Transcription			GATGAAGAGCAAGTTCCTTTTTGTTTTCCTATTATTGGGAATTCTTAACTGTGAGGCACAATATTTCAATGCCAACCCATACGACTATTTACAACTAGCCTTAAGGTGGCCTAATTCCTATTGCTTGACACATGAAGGTGGTTGCAGGGAAATAGTGCCACAATATTTTACTATTAGCTACCTTCATCCCATGAGAAGAGGAGGCCCTGATCTGCAAAATTGCCCCTCACCATTTAATATGCCAAATAGCACTATGGAGATAAACAAGAATGACCTACTCAAATACTGGCCTGATCTGAGAACTGATAATTTTATTGAGAGCAAGTCATTATGGAGGGACCAATGGAGAAAGTTTGGTTCATGCTATAGTATGATGCCAGATGACTATATTGT
Gma.1643.2.S1_at	BI321500	At1g55300	3e-52	Post-Transcription			GAGCCTGATCTTAATGTATAGTTTTCATTCACATAACATTTCTATTAACATGCCTCTCTGCCTAATATATATATATATATGCTCTCATAAATACTTTTTTTTATTCTTTTTCCCATTTTTCAGCCTGAGCTTGTCTCC
Gma.3860.1.S1_at	BG839262	At1g14650	5e-90	Post-Transcription			ACCACCTTTGCCTCAAGGAGTGCCACCNCCACNGCCACCAGAGGAGGCTCCTCCNCCACTCCCAGAAGAACCAGAACCAAAGAGGCAGAAACTTGATGATTCTGCTCTGATNCCTGAAGATCAATTTCTGGCTCAACATCCTGGGCCTGTTCGCATCAGTGTATCTGTTCCTAATGTTGATGAAGGAAATCTNAAGGGACAAGTTCTGGAAATTACAGTGCAATCTTTGTCTGAAACTGTTGGTAGTCTGAAGGAAAAAATTGCTGGGGAGATCCANCTCCCTGCTAATAAGCAGAAATTGAGTGGAAAGCCTGGCTTTCTCAAGGATAATATGTCACTNGCCCATTACAATGTTGGTGGAGGTGAAACACTTACCCTCNCNTTAAGAGAGCGTGGTGG…
Gma.2161.1.S1_a_at	CD404355	At1g03330	2e-42	Post-Transcription			TCTTCTCGTACTTCAAGGATTTGGTGGGGAGGGAAGTAATCGTGGAGCTGAAGAACGATTTGGCCATCAAAGGNACNTTGCATTCTGTTGATCAGTACCTCAACATCAAGCTCGAAAACACTAGCGTCGTCAATCAAGAAAAGTACCCTCACATGCTTTCTGTAAGNAACTGCTTCATCAGAGGTTCGGTAGTGAGATATGTGCAATTGCCTCCAGAAGGNGTGGACATTGAATTATTGCACGATGCCACAAGAAGAGAAGCNCGGGGCGGTTANTGTCTTCATTTTGTGNTGTANTCTTATTTANTGAGANNATTCNGTGGGCTTNCATAAGGTGGATGTTANCCTTCCTACTNCAGAAGGAAACTCTTTTCAGATGTT
Gma.15988.1.S1_at	BE657247	At2g23930	5e-36	Post-Transcription			GAAATCGCATGATTGTTGGCACTCTCCGTGGCTTTGACCAGTTTATGAATTTAGTTGTTGACAACACTGTGGAAGTGAATGGCAATGAGAAAAATGACATAGGGATGGTGGTAATCAGAGGAAATAGTGTGGTCACTGTTGAGGCGCTTGAACCCGTGAACAGGGCCTGATTACTATTTCTTGTAAACATTTATAAGTAGATTTTCTGGTTTCTGTGTTTGAACAACGTAGCTATTGAGAGTAACATGTAATTGTGAATCTTAAGAGTGTCATGTTGGCTGCTAATTTGGGGTTCTTTTTCAGGCTAAATTGTCAAGGCGGGATGCCTTCTATTGTTTTAGTGTGTTGCCTGTGTGACTTGACTCAATTGAATATATCCCTTTTAGCTG
GmaAffx.63983.1.S1_at	BI427431	At2g03870	4e-43	Post-Transcription			GTTTTGGACCTTGCAAAGTTTGTAGACAAAGGCGTTCAAGTTAAGCTTACTGGTGGNAGACAAGTGACAGGGACTCTGAAAGGGTATGATCANTTGCTTAACCTTGTCCTAGATGAAGCTGTAGAGTTTTTAAGAGATCCTGATGATCCNCTCAAAACTACNGANCAGACCAGAAATCTTGGCTTAATTGTTTGTAGAGGAACTGCTGTNATGCTTGTGTCCCCAACTGATGGTACAGATGAGATCGCCAACCCCTTTATNCAGCCAGATGGGTCNTAAGTGTGAAGTATTTGTATCTTAAAGTCTGTATGCTAGCTGATCAATACGTCATCGCTTAGCTACTGAGACATTAATGCGGGGATACTGATTAACGTTTTGTCTATTTTGTAGGCTTGGATA…
Gma.7350.1.S1_at	BU547120	At5g54580	6e-28	Post-Transcription			AAAGGCTTCGAGAGGAGTTTGCAAAGTTNGGTGAAGTTGTTCATGCNAGGGTNGTAACTGATCGAGTCTCAGGTTACTCTAAGGGNTTTGGTTTTGTTCAATATGCTACAATAGAAGANGCTGCAAAGGGCATTGAAGGCATGGATGGCAAGTTTTTGGACGGTTGGGTTATATTTGCAGAGTATGCGAGACCAAGACCACCACCAGGCCAACCTCTAAATAGCAACAGTTCTCAGTATGGCCGGCAGTGATTCCTGTTATTTATNTAAAACATTCTTATGCCCATTGAACTGGTTGTCTCAATTAGCAATTGCAATTCAAAAAGTATTATTTATTAGGGCATGGATGCTCGGGTGATCTTTAATTATCTATANAAGTTCTAGATTATTGTAATGGAAG…
Gma.4891.1.S1_at	AW666297	At3g14450	1e-15	Post-Transcription			TTCCATCCTTTTTCTGTCAACAGCAGTTACTTTTTTGTTACCAGAGCTTATAACTATCATGCACTAGTTAAACTTCCTAGCATCCAGTCTTTGATTGTGAAGTATTTATACCGTATCTACATTGAAATGGTCTAGTTTCAGTTTTTTTTGTTACTNGGAGCTAGTACTAATCGTACTTTAATTTAGCNTGAATCTTTTGCNCNNNNNNNANTNNNNNNTNNNTNTNNNNNCNGTNTGTTTAGCATCTAATTAGGGCAAACGTTCAAACAATAAAGATTTGTGAGTGTGAAGATGTGATTTTGAGTTCCCTCAAATTAAAAAGGTAGGTGCACATTAAAACATGAA
Gma.16165.1.S1_at	CD405682	At3g15010	0.0004	Post-Transcription			AGAGGTGTATCATCGCTTATTGGGCGCAGATGCTTTGTGTGCTTCTGGTGATTGCGTGAATTGCAGACTATGTGCTCTGGTGTAATGTATTTGTTAGACTGTACTTTTACAGCCTCTTGACTTCATCTGCTCCCTTTTAAGCCTTGATTCATATGAATGTTACTAGTTAAAGCTGTTGCGATAGACTAGTTTTGTACTTTTAGCTGGATCATCTGGGCTGATACAGCCTGTTTTAATTATATAGTCCTGGACTATGGTGAATTTTATT
Gma.10694.1.S1_at	CD401683	At3g48670	7e-60	Post-Transcription			GAACATAATCCTAGTGGGCGATACTTAACCTCGGTGTTATGGAACTATAAACAAGGAAGAAGAGCAACTCTGAAAGAAGGAGTACAATTTATATCGAATCAATGGAAAGTCCTTAAACGCAAGAAGGGAATGACATGAAGGTTTGTTTATAAGTATATTAGGTATTGCATTTGTCTTTTGAACTTAGTGGTTAATTTACATTATTCACAACTCCCACCTTTTTATATGATTAGTGTTATTGTTTCAATTATTGTCGTGTAACTAAGGATTGTATTTCTGAAAGGTTGATGTTGGTTTTGGCGAGAGAATTATGCATTGCAGCCTGGTAGCATGCATCCGTATTGGGAGAGCAGCNAACCTAGCGGTTGTGTTTTAGGTTAAGTGATTTATGATAATGTC…
Gma.1749.1.S1_at	BE824426	At2g04240	2e-31	Protein Destination & Storage	Ubiquitin Degradation		CTCTGTATGCCTCACTCAGTTTGAACCNGAATCNGAGATAAACCGCTTATCGTGCGGNCATCTCTTCCACAAAGTGTGCTTNGAGAAGTGGCTGGACTACTGGAACATTACATGCCCNCTTTGCNGGACTCCCTTGATGCCNGAAGATGACACACCTTGCTTTCAGTAAGCAAAANCAAGNGAGCATGNCAATAAGAGAGAGTTTCATGTACAGTGTAGTGTACATATTCTTGAGGGTTTTTGATGTTCATGCATCTGAGTTCTGCCACCTTTATAAGTTTTTAACCTTTTTCCTTTTATGGTCTGAGTTTGTGGAGGATTTTGTTTTTCCCTTTTTCTGTCTGTGCTNTTTAGCACACATGAGGGGTATACTTTTTGCTTGCATGNTATGTTTGTTCA…
Gma.4642.1.S1_at	BI321936	At2g37150	3e-69	Protein Destination & Storage			GAGGGTTTCATGATTGTTGATCGCACTTCACTGTATGGACCTAGGAATATGCTTGATCGACATAGAGACATGAGGATGGACATAGACAACATGAGTTATGAGGAACTACTTGCACTTGGAGAGAGAATAGGCCATGTGAGCACAGGATTGTCTGAGGATTTGATTTCCAAGTATTTGACAGAAACAATATACTGTTCATCTGAGCAAAGTCAAGAAGAAGAANCTTGTGCAATCTGNCTGGAAGAATACAAGAACATGGACGATGTNGGGACGCTGAAAGCTTGTGGACATGATTACCATGTGGGTTGCATTAGGAAGTGGTTGTCTATGAAGAAAGTATGTCCTATATGCAAAGCTTCTGCTTTGCCTGAGGATAAGAAGGGCAAATAAACAATTTAT…
GmaAffx.49469.1.S1_s_at	BG047279	At3g11110	6e-20	Protein Destination & Storage			AAGTGGCTCACTCATCACTCTAGTTGCCCTCTCTGCAGAGCTTCTCTCAAGGTTGAATCTTCCTTCCCTAAGATTTTGATTCAGGAACCACCCCTTAGAATTGACT
Gma.16744.1.S1_at	BI970347	At1g68070	3e-67	Protein Destination & Storage			CTGCAATCATCATTTCCATTCTTCATGCATTGTGAAATGGCTGAAGATGAATGCAACTTGTCCTCTCTGCAAGTACAATATTCTAAAGGGAAACGAACAAGTGTGACAGAAAAGTGAAGAACATACCAAGTACCAACTGGGTGTTTCAACAACTGTTCTGTAATATGTATATATAATTTCAAGACAAGAAGGTAAAGTTTACCTCCGTACTCGTTGGGTTTTGATCGTTGTTTCGTTTAGCGGTTTCTGTAGAGAAAAGATATATAGAGCATTTATTGGTGAATAAGTTAGCAACTGTAGTATGCTTAAGCATTATTTCGTCCTTTTTAGATTCAGAGTTGTCCAATTTATGGATTGTTCATTACTTTTCTGACG
Gma.4662.1.S1_at	BQ740603	At5g49570	1e-60	Protein Destination & Storage			CAGTTGGCAGGTTTTTGACAAGCAAACCTCTCAGTTCTTTGAAGACCGTTTCCAGCGCAGAACATACACAATCAGTTCTGCAAGTTTTCCATGTAATGTTTTCAGGTTTAGGTTTCTGGCAGTCAGAGATATTCAGTCTAATTCCCGGCTGCAAATCGGTAGCATTGACCTCTATGCAAAATCTATATGAAATCCGGAGACTTTAATTACCTCCCGACTAAATTACGAAATAGTTAAGGTCTCCTTCTTCCGATGATCCGAAAAATTAAGATAAAAGAAAAAAAAATCTATATGAAATATAGGTAAATTGTGAGCATAGTTGAGCAAATTCTTTTGTCTATGTCTTATTTTATAAGAAAAAGAAAATTAAGATTAAANNNGTCTATGCCTTAAAAGGAA…
Gma.15880.1.S1_at	BE823347	At2g30410	6e-46	Protein Destination & Storage			GAAGGAGCTGCATTCTTATGAGAAGGAAGTTGAGAGAGAAGCTGCCAAAACAGCTGATATGAAGGAAAAAGGAGCCGATCCCTATGATCTCAAGCAACAGGAAAATGTCTTGGCTGAGTCTAGGATGATGATTCCTGACTGCCGCAAGCGCCTTGAGGCCGCTTTGGCAGACTTGAAAGGATTATTGGCTGAGTTGGAGGAGTCGGATGAGAAGGCCAGTCCTGAGATTGATGAAGCTCGGAACACCATCGTAGAAGTTGAAAAAGTATTTGAAACAACAGAAGATTAACAAGGTTGTTTGATTAGTGCTCTTGATGGAGGATATTGGACCTGTATTGTACATTTTCCTGGTCACAAACAATCATACATTCTTCTTGTTCCATGTGCCCTCTCCTCCAC…
GmaAffx.90980.1.A1_s_at	CF806705	At5g19180	2e-46	Protein Destination & Storage			GGAAGAACATCCTAAGTTGCGATTATCAAAAGCTAGTATTACACATCGAGGAAAGAATCTGTACATGCAAGCTCCCCCTGTATTGGAAGAAATGACTCGATCAAACCTGAATCTATCTCTTTTTAATCTCATGGGTAAATTGCCCAAGGATGTTGTGCATGTGAATGGTACAACAATCAAGAACGACCAAAAGTTTTCCTGTTTGAGAAAATTACGTGTTGTTTTCAAGGGAGTTGACGGGGTTACAGATATGGATACAGCTGGAGGAGCATAACTTACCACATCCAAACATGTTTTGCTGCTAGAATTTTTTCGGCTCTATATGCATAGTTTATGTTAGATATCATAGCTTGTTTCCAATATTGGTCAGGTAAGGTTTTACAGTTTCTACCTGTCAAA…
GmaAffx.91367.1.S1_s_at	CF806415	At5g53300	7e-79	Protein Destination & Storage			TTAAGTGACCTTGTGGTATGTTTGAGGGAGAGCCTTTCTACTCTCAGTGTTTAGGTCTCTCAGCCCTTGTAGGAATATTTGTCGTTTTAAATCATGATTAAGGCCCCTCC
GmaAffx.92802.1.S1_s_at	CF806550	At1g75440	2e-76	Protein Destination & Storage			GATTGCCTGCAATAGGCTCCAGAAAGAGCTCGTGGAGTGGCAGGTCAATCCCCCAACTGGTTTCAAGCACAAAGTCANNNACNANCTCCAGAGGTGGGTGGTTGAAGTCACTGGAGCTCCTGGGACACTTTACGCTAACGAGACCTACCAGCTTCAGGTCGATTTTCCTGAGAATTACCCGATGGAAGCTCCTCAGGTGATATTCTTGCATCCGGCTCCGCTGCATCCCCATATCTACAGTAACGGCCATATTTGTTTAGATATATTGTATGATTCATGGTCCCCTGCGATGACAGTTAGTTCTATCTGCATCAGTATTCTCTCAATGCTTTCAAGCTCAACCACAAAGCAACGCCCTGAAGATAATGACCGCTATGTAAAGAACTGCAGAAATGGCAG…
GmaAffx.92634.1.A1_s_at	CF809148	At1g63800	1e-79	Protein Destination & Storage			ATGATGCGTGATCGACCAAGTTATGAACAAAGGGTTAAAGAGTACTGTGAAAAGTATGCTAAACCTGAAGACATAGGGGAAGCCACAGAAGAGAAATCCAGCGATGAGGAGATGAGTGAAGATGAATATGACTCTAGTGATGAACAGGTTGTTGGTAAAGCAGACCCCTAGCTTTG
Gma.15387.2.S1_at	AW101379	At5g41700	1e-83	Protein Destination & Storage			TGCCATGGGATGACCGTATTGAGTTTTTAGCTGTTCAATGAAGCTGCAAAATCATAATTTATGTAAAAGAACAAAAGATATTTTGAACGGAATTTGAATGCTTTCTTTTATTATTAGTGAAACTCCACAATGGTAAGAAGAGACCCGGTTGCCAATTTGTGAATATTTTCTTTGCTATGGAAGAATGTAATGTTATGCAAACTTTTCTGCATGTTGATTTGATATTCCAA
Gma.8301.1.S1_at	CD401870	At1g23260	4e-71	Protein Destination & Storage			TTCAATAGATGATCCAAGTTCACGGACTTATGCATAATGCATTTATAATGTAATTATGGACCACTTCCGTATGTTACCTGGAGCAATCCAA
Gma.8301.3.S1_at	BI321023	At1g23260	6e-67	Protein Destination & Storage			CGGTCCCCCTAGTACTGTTCATGAAGGGCGTATCTACCAGTTGAAATTGTTTTGCAGCAGGGATTATCCAGACAATCCTCCATCTGTTAGATTTCAAACAAGGATTAACATGACATGTGTCAATCAAGAAACTGGAGTGGTTGAGCCACATTTGTTTCCTATGCTTGCTAATTGGAAACGTGAGCGTACAATGGAAGACATTTTGATTCAATTGAAGAGAGAAATGATGTCTCCCCAAAATAGGAAGCTAACTCAGCCTCCTGAAGGCAATGAAGAATCCAGGGTTGATCAAAAGGGGTTGGTGGTGAGATGTTGTATTGTGTAATTCCGTGGAGAATCCAAGAATAATAATAATGTAAATAACTATATTCAATAGACCACTTCCTCCCTGGAGCAATC…
Gma.3801.1.S1_at	BI497593	At2g33770	1e-113	Protein Destination & Storage			TGCTTTCCTTGTCACAACCAAATCCATGATGTATCTATTAAGAAAGCCACCAAAGCATTTTGAAGCACTGGTGGAAGAGCACTTTAGAAAATGCTCCCAACATATACTTCTTGCTTGCAAGGCTTATCTTGAAGGAGCTTCTATTGGATGTGCTTTNGNNAGTGGAAAAACTGGACATGAAAACCAGAAGGGGACTTCAACAGGATTTAAAATTATGCTTGCTAAGCTNTTCCCCAAGCTTGTAGAGGCATTTTCTGATAAGGGANTTGATTGCAGTCAGTTTGTTGATCTNCANAAANAANCTTTACTTACTAAGTTGNAAGTANCTGCCAAAAATCCCGACCGAGATATCCCAANCTTATGTGTAATATCAATATANNNANATTCTCAGTATAATAT…
Gma.16756.1.S1_s_at	BI967486	At3g52560	1e-73	Protein Destination & Storage			CAAAGAAATTTGGTCTTCTTGCAAATTGGCAA
Gma.9526.1.S1_at	BU549400	At3g17000	5e-90	Protein Destination & Storage			GAGATTCCAGATCAAGCAGGCGACAGANTTGTTGAAGAACAAGAACTNCCTGTCAATGNTAATNCTAACCCTGCAGGAGTTGAAGCTTCAATGGANANTTCATCCAGNGNCTCAAGTAACCAGTTGCTCCAAAAGTCAGATGCAAGGGTTCAAAATCTGAAACCAGAGACAAGGATTCAAAAATCTGACGATCGATTGTTTACACTTGCTGCTATTGGGCTTACTATAGCAATTGTGGTTCTTTTGCTGAAGAAGTTCATTAAATCTACAGAATATGGTGCTGTTTTCATGGATGAATCTTAGATGAATNNTTTGNTCNTGTTNGCTTCAATATCAAGATTCTTAGCCCANGGTATAGTCGATAGGAAAATTTAGAACTTCTCTGATATTTTATGATNT…
GmaAffx.90199.1.A1_at	CF806975	At3g57870	1e-77	Protein Destination & Storage			TAGGGTTACATCAGCTAAATCTATAAACTATTTTTAGTATGGCAGATGTTTCTTCATTTGCTCCGTGTTAAAACTGTTTTATCATTGTGATTAATGGCTGCCATAACATTTAGACATGAT
Gma.5718.1.A1_s_at	BQ629764	At5g05080	2e-08	Protein Destination & Storage			GCTGTTAATGGTTCTTCTGCTGCTACAGTCATATCTGCTGCTTCTGCACCACCAAAGAAGGAAGGTGGACAAGCAAAAGCTCAGGCGGACAAGAAGAAGATAGATGCCAGAAAGAAAAGTTTGAAAAGATTGTAATAAAAATCTTCAATCATTGAAGTTTTTTATTTGTGTTTTAGTTTTACATTTTGATAGAGAAAGAGGGGAGGGAGTNGGGGATGTGGTCTCCTGGGNTCAACATTTGCNTTATAAAACGAGTGAGGTATTTTCTTTGGGAGTAAAT
Gma.1408.1.A1_at	AW830681	At1g55860	2e-28	Protein Destination & Storage			TCCAAGGAATTTCAGGCTCCCAGAAGTTTCAGATACACAAAGCATATGGAAGTCCTGATCACTTGCCTTNTGCTCATACTTGCTTCAATCAATTAGATTTGCCGGAGTATCCATCTAAACAACATTTGGAAGAGAGGTTACTGCTGGCAATTCACGAAGCAAGTGAGGGTTTTGGATTTGGTTGAGAAGCTTCAGTGCGGATGGGACAAAATACAATGTATTACATTTTTAGGTTAGGACCTATTTTAAAATGGAATTGAGTGGTACAGGGCAGGGGGTCGAAGTTTTTAAGTTCATATCATGTTAATATGTTGTACAGTCGTATATTTGCAATGGGA
Gma.1820.1.S1_at	BE658197	At1g55860	1e-127	Protein Destination & Storage			GTGTCTCCAACTTGTCATTTGGAGAAGGAGTTNGTGCTGCTATTCTGTTGTGGGCACTATTGGTAAGCATCNCAATGAGTCNATGAGGCATTCTGATGTTGGTGATCAATTTATTCTGATGNTCTCCCNGNAAAAANTGGCTAGAATGTTTTTTNCNNNATTNTNATNNNNNANANTCTGCCATGCCTAGTTTGGGAGCTTTCTGACAGCCTTCATACTGTGTCAAGCTTTTGCANTNTGGTCCAATCTTAATTTATATGTAGTTTCTATGGCCAAACAGCCTTTTATAGTTCTAGAATTTNCTAATAAGATTGAGGATGTACATATTCTGGAATACATAATTGATGNTTTTGCTCCANNNNNNNNNNNNNNNNNNNNNNNNNNNNNNNNNNNNNNNNN…
Gma.1782.2.S1_a_at	BU579169	At5g15400	5e-88	Protein Destination & Storage			GATGAAGGATCCAGTTATCTTGCCTTCTTCAAGGATCACGGTTGATCGTCCTGTCATTCAGAGGCATCTTCTTAGTGATAGTACTGANCCATNCAACCGTNCTCATCTTACNGCGGATATGTTGATTCCCGANGATGNGCTAAAAGCNAGAATTGAGGAGTTTGTCAGGTCTCAGGAAATGAAGAAACACTTNAGCCTACAGAGNACCAAGGCCACAATTCAGACTACAA
Gma.12475.1.S1_at	CD392558	At4g01000	8e-21	Protein Destination & Storage			AAATCAACTCCCCTGGATGAACTTCCAAAGAAGCTGNTTGCGAAGAAGTAAGGAGANTTTTGANANGGCAGTTNTTTCTCTGTACAGTATTTCNTAACTNTTTGCACCTTNTACNTGGGTGTCAGTTNTATCCTCTGATGACTTNNGGAACTNNGACTGATGCATGCCTTTTCTGTTCGTTTTAGTGTTCATATTGGGCTGTATTTTGATGTAATAAATACCGTTACCAGCNAGCCAAAGGAAGCTGAACACTGTATAACCCAAGAAT
Gma.5658.1.S1_at	AW351312	At2g21270	1e-120	Protein Destination & Storage			GCCCAAGTTCAACCCATTTTCTGGAACTGGGAGACGCTTGGATGGAAAACCNTTNAATTATCAGCCTCCTCCAGTTTCNTCTTCAGGGTCNAAGGACCAGAAANCTGATGTTGTCAATTNGCNGTCTTCTACAGCTTCTAGTTCACAAAGTAATGCTCGTCAATCTCAGGGCAAGCTTGTGTTTGGGTCAAATGCNAACCGTACTAANGAGACAGGAAAGGCGAAAGAGTCAAAACCAGAGCCACCTAAAGAGAAAGAAGAGCCGAAATTTCAACCTTTTTCAGGGAAGAAGTATTCTTTACGGGGTTAANNNNNNNNNNNNNNNNNNATTAAAATGGCCTTTTACTTTTAAAGCAAGTTACTTTGTTGATCTATGCATGGATCGATGTCTATTGCAAA…
GmaAffx.90621.1.S1_s_at	CF806346	At2g21270	1e-103	Protein Destination & Storage			GATATCATGGGACATCATTTGAGCAGATATATCGATGCTACCCAGCTTCCTTTATTGAAAAGCCCCAAATCGAAAGTGGTGACAAAATTATCATGCCTCCATCAGCCCTTGACCGTCTAGCATCTCTGCATATTGATTACCCAATGTTGTTTGAACTCCGTAATGATGCTGCCGAGCGGGTTTCTCATTGTGGGGTTCTGGAGTTCATTGCTGAGGAAGGCATGATATACATGCCATACTGGATGATGGAGAACATGCTTTTACAAGAGGGGGACATTGTCAAAGTGAAAAATGTGACACTTCCAAAGGGGACATATGTTAAGTTACAGCCCCACACAAAAGACTTTTTGGATATTTCCAATCCAAAAGCTATCTTAGAAACAACATTGAGGAATTTTT…
Gma.4777.1.A1_at	BI969077	At1g08190	1e-09	Protein Destination & Storage			TCTTTTGCTGTCATGGTTATCACACAACTTGTCTCATGGATTCATCTTACACTAGTAGTAACAAGAAAGAGGTCCAAGCCACGACCCTNNANNCNGNANNNNATGATGATTACAATGGTTATGACGATGATGCTAGTGATGACGATGAAGAAGCCAAATCGGGTGGTCCTCGTATGCGTTGTATATTGTGTACTACTGCTGCTAGTTGAGTGTGTTTTTGTATGTGTCCACAGTTTGTGTTTGCATGGTTAATGTTTTAGTTCATAGTTCCATGCACAACGAGC
Gma.5966.1.S1_at	CD418432	At4g32940	1e-125	Protein Destination & Storage			GTCCAGAACTGCTTAGCAGTGTTAGACCTGCTGGGCAACCACTTGTTGATGACTGGGACTGCCTTAAAACANTGGTTAGGACTTTTGAGACACATTGTGGATCNCTGTCTCAGTATGGGATGAAACATATGAGGTCCTTTGCAAACTTCTGCAACGCTGGAATACGNAAAGAGCAAATGGCTGAGGCCTCNGCACAAGCATGTGTCANTATCCCTGNNANGTTCCTGGAGTTCTNTGCACAGGGGTTTCAGTGCATAATTCCTAGAATNCGCTCCATTGAAGACNGAGTATAGTCGTTGTAACATTATTCTTTACGAGNGTTATGNACTGTACNNNCTGNNCATGATTTCTTATACCAACCCTGTNAATANNNATGGGACGCTGGGGAAACCTNTTTAC…
Gma.12349.1.S1_at	BQ094104	At1g75850	2e-38	Protein Destination & Storage			AGATCACTAGTTCTACTATCCAAGGGCTTATAGAATTGATCANGACCGAGATGCAGAGTGACTCTGCTTCAGCTCTTCCAGCTTCGGATGCCTTTTTTACCAGCACATTGAGGTACATCCAATTCCAAAAACAGAAGGGTGGTATACTGGGTGAAAAATATGATCCCATCAATGTCTCAATCCCTGCCTAACATATCCANGACNCCCAAATGGGAAGTTGTATGAAAAGCCAAACATGTTGTTGTGAGTGTTCATCTTCATCTTNANNNNNAAAANNAAAAAAGGTTTATCAGTGTTCACTACTNGTGCATTATAAANTGTTTGCAGTGGCATCAAGTTNATTTNGAAGTGAATAATNNNNNNNCTTCCTACAAATTCTTCTACTTGCTAAATG
Gma.10732.1.S1_at	CD391457	At2g28000	1e-177	Protein Destination & Storage			TGCAGCATTGATTGCTCAAAATGCTGGAATAGAAGGTGAAGTTGTTGTGGAGAAAATAAAGAGTGGTGAATGGGAGGTCGGTTACAATGCNATGGNAGACAGGTATGAGAATTTAGTGGAGGCTGGAGTTATCGACCCTGCCAAGGTAACNAGGTGTGCNTTGCAGAATGCTGCTTCAGTTGCTGGAATGGTGTTGACCACNCAGGCCATTGTGGTGGANAAACCTAAGCCCAAGGCACCTGTAGCTGGTGCCCCACAAGGCCTTACCGTT
Gma.17973.1.S1_s_at	AI460813	At2g18600	6e-82	Protein Destination & Storage			GACAAAGGTCTATCATCCAAATATTGACTTGGAAGGAAATGTTTGTCTCAACATCTTACGAGAAGATTGGAAACCTGTCCTTAATATAAACACTGTCATCTATGGCTTGTATCATCTNTTCACGGAACCAAATTACGAGGATCCACTGAATCANGATGCNGCTGCTGTGTTGAGAGAGAACCCNAAGATGTTTGAATCTAANGTGAGGAGGGCAATGGCTGGAGGGTATGTGGGGCAAACCTTTTTCCCACGCTGTATTTAGACCTTTTGCACGATACCTTCAAGNTCCTGTTCAAATATGTTATCAATGCGTGAAGGCCCTTGGTTTGTAAAATTTATCAAAAAATTGGATTTTACTTTCGTCAGTTATGTTATTTTTCTTGGTGGAGCGACAGGCCA…
Gma.3661.1.S1_at	BI425132	At1g47710	2e-34	Protein Destination & Storage			AGAAGTTCATATGGATCCCCTTTTATTTTTGTTGTTACCAGCAATTATTANTTATTACCTACGAGTGTTACATGAGGGCCTATGTAATTACGTGATTAGCCAAATATTCATGCTTTAGTGGGATGG
GmaAffx.67038.1.S1_at	BE022668	At1g47710	1e-106	Protein Destination & Storage			ACTCTGCTGTGGGTCAAAACTTGTTTGTTTCCGATATATTTCATAAGTCTTTTATAGAAGTAAATGAAGAAGGCACTGAAGCTGCAGCGGCCACCGCTGCAACTATACAATTTGGGTGTGCGATGTTTCCAACTGAAATAGACTTTGTAGCTGACCACCCTTTCTTGTTCCTGATCAGAGAAGATTTAACTGGAACAGTACTCTTTATCGGACAGGTGTTGAATCCTCAGGCTGAATAATATTAACATTGGTAGCAAAACTTATGCTCCTATTCTGTTGTCTTGATTTACCTATGGTTGGATGATCCAAAATTTCTGGCAGTTTCACATGTGGCTTAAGAAGGTAAAAAGGTACATATGGATCACCGTTTTAAGTTTTGAACACTTACGAGTATGGCGT…
Gma.1605.1.S1_s_at	BI425139	At1g48900	0	Protein Destination & Storage			TCCCTTTTTGTGTATATTTACTTATTTANTATTCAGAGNAATCAANNNNNNNAGTAATCTTATTNGAAATTTTCATAGTCTAGNAACATTANAAACAAAAGCTATATTCCTCGGATCATGCTTGTCTCGTTTTGGATTC
Gma.17407.1.S1_at	BG650554	At4g30600	1e-87	Protein Destination & Storage			AAGCTTCACGCAATGGTTCGGATGTGGTTCTCGTTGATACAGCTGGTCGTATGCAGGATAATGAACCACTTATGAGAGCACTGTCAAAACTCATCTACCTTAACAATCCAGATCTAGTCTTATTTGTTGGAGAAGCACTGGTTGGTAATGACGCTGTTGATCAGCTTTCAAAGTTCAATCAGAAATTAGCNGACCTTGCAACATCACCTAATCCAAGATTGATTGATGGGATCTTGCTCACGAAATTTGACACCATAGATGATAAGGTGGGAGCTGCACTTTCAATGGTTTACATATCTGGAGCTCCTGTCATGTTTGTGGGCTGTGGACAGTCTTATACTGACCTCAAGAAGCTCAATGTCAAATCAATTGTGAAGACTCTCCTTAAATGAGGGCACA…
Gma.7039.1.S1_at	CD406816	At1g53530	1e-35	Protein Destination & Storage			GAAAATTTGGTCCTGTTCCTTATGACCTTATTGATGGCAAGATGTTCTGGAGGATAACGCCACTTAAAAAATTTGGACCTTTCTGGAATAAATGATCTGAAGCAAAGNATTCTGTCATGGAAGCTACAATCTTTTGCAGCATGGCTTTGTNNNATGTTTAATTTTGAAAGGCAAAACCCTACCTATCTGTAGTTAATTCCCTAGACTGGTGCACTTTGCTCACCAAAGATTNAAATTGCCACATTTTGTTATAAGGGCAGTTTTNNTNTTTTTNTTTTTTTTTTGACGAAGCAGTTTATCTTTTATGCATGAAGTAAATGACAAGTAGTAGATGATCATAANAATCTACTCAGATATTAGAAATGGNACATAGAATTTTCTGTTGTTTGAGCACATCCC…
GmaAffx.39534.1.S1_at	BF595998	At3g08980	2e-45	Protein Destination & Storage			TAGCTACAAGTTTTCACATGGCGATGTGGTGGTCTTTCGCTCCCCACAAAATCGCAAGGAGACACACGTAAAGAGAATAGCTGCATTACCTGGTGAATGGTTTGGCACTCATCAGAAGAATGATGTGATTCAGATTCCATTAGGACATTGTTGGGTTGAAGGAGACAACACAGCTTCTAGCCTGGATTCAAATTCATTTGGACCAATTCCTTTGGGCATAATTCGGGGAAGGGTTACCCATGTTGTGTGGCCTCCTCAAAGAATAGGAGCTGTCAAGAATACTCCACCACAGTTGGATCGACTACAGGAATAANNNNATATTGTCTTTTTTGTATAGTTGGATCCCAACTCTATTGTTTGGCCTCCTCAAATAATAGGTGTGAAAGAACTACTTCAGAA…
Gma.5127.1.S1_at	BE021594	At3g45010	5e-24	Protein Destination & Storage			GAATTTGTGGTCTCATCCGAAGTTCCTTTCACAGTTGATGATTCTGAAGCTGGATTATTGAAGAAGTATGGACCTTTAAGTTTCCTTAAGGTCCATGATGCGGGTCACATGGTTCCGATGGATCAGCCGAAGGCTTCGTTAGAAATGCTGAAGAGGTGGACTCAGGGAACCCTTTCAGAATCTGCAGCTGATGCGGAGAAATTGGTTGCGGAGTTGTAATCACTTTCGTTATTGCAATTAGTCCAGAAAAGGGATACAAAAGTATTATGCAATAAAGAGAAGGGAATTAAAGTGATCAGCATGTGTTATTAATTATAAAGTGAGATTGAATCAAGGCCATGCAGGAAAAAAACTATTCATATATAGAATTTCGTGTGTGCATGTATACTGTTTTAATAA…
GmaAffx.11242.1.S1_s_at	AW317461	At2g27920	5e-29	Protein Destination & Storage			GTGGATCTCATTTGTGCAACCAAGGGGACTGAAGCTTGGCTTAAAAAACTCGAGTGGACAGGGCTTCAAAATTTCTTGGAGAAAGACAGAACCCCCCTCTACTGTGGAAGTGACAAAACGACCAAAGGGTTTTTTAAGTCATACAAAAACCTACAATTCTATTGGATCCTTGGAGCGNGTCATTTTGTACCTACTGACCAGCCCTGCGTAGCACTGGATATGGTGGGTGCAATTACACAATCACCAGCGGCTTGAGGATAATATGCACCGAAT
Gma.725.1.S1_at	CA803003	At4g36195	1e-33	Protein Destination & Storage			TGCCTTCCTACACCATCACATGTAGCAATTGTGCCCATTGTACTGATTTTCGAGGATGTCCTCAATCTCCTTTGGTCCTTGAAGGTAATGAGAAGAACTGCTCCTCACCTGATGCAGTTCACAAAGTAAGGCAACAGATTACAGAACATATGGACTTGTGGCTATCTGAGTGCCAAGAAGGCAGCAGTTATATATGATCACTAGTATGTTAACCCACGCACTGAAATGAATAAAGTAATAAATTAGTATACACTAATTTCATCCTTCATG
GmaAffx.19977.1.S1_at	BU926774	At5g55160	3e-45	Protein Destination & Storage			GAAGCCTTCTGATCAAGGAGCACATATTAATCTCAAAGTCAAGGGCCAGGATGGCAATGAGGTTTTCTTTAGGATTAAAAGAAGCACTCAGCTCAAGAAACTGATGAACGCATACTGTGATCGTCAATCTGTAGATTTTAACTCAATTGCTTTCTTGTTTGATGGAAGGAGACTCCGAGCAGAACAGACCCCTGATGAGCTAGAGATGGAGGATGGTGATGAGATAGATGCAATGCTGCACCAAACCGGAGGTGGACATAAGTTTCTTCAAATGTATGATGATCATCTTCATCAAAATGCTTGAGAAAACGCATGGTATTCGGTGCTTGCTT
Gma.3183.1.S1_a_at	BE822841	At3g20050	2e-51	Protein Destination & Storage			AGGTGCTTTCTGTTAATGCTGCTAAGGATGCCACTGAGCTGGTCACAAAATTACGGGCCTACCACCATTCAGCACAAACTAAAGCCGATAAGAAACATTTATCAAGTATGGGTTTGGACCTTTCTGAAGGGAAAATCAGAAACAACTTGGAGGCTGGAGTNATTGAGCCTGCAATGAGCAAAGTAAAAATTATTCAGTTTGCAACTG
GmaAffx.35346.1.S1_at	AW432825	At5g59190	2e-79	Protein Destination & Storage			GTAATCTCTGGCACTTCAATGGCCTGCCCTCATGCTACTGCAGCAGCTGCATATGTCAAATCATTTCACCCTAGTTGGTCTCCTGCTATGATCAAGTCTGCGTTGATAACCACTGCTACTCCAATGAGTCCTATTCTTAATCCTGAAGCTGAATTTGCATATGGAGCAGGACTAATTAATCCTGTTAAGGCCGCAAATCCTGGTTTAGTATATGATATTAACGAAGCNNANNANANNNAGNNNNNGNGNGNNNNNGNGNNNNNNNNNNANNNNNTNCNNANNNNNNCANNAGATCATAGCAGTTGTAGTGGACGAGCTAACAAGAAAGCTGTATATGAATTAAACCTCCCAACATTTGCTCTTTCTGTTAATGGCTTAGATTATAGTCGTGCTTATCGA…
Gma.9157.1.S1_at	BG237924	At4g22670	1e-21	Protein Destination & Storage			GAATACTTTTAGATGCTTGTAAGTTATTTGAGACTTCAACTTTCCAGCCCTCTGGCATCGGGTATTTAATGTTTATTGCATTTTTAATCTTACCGAAATTATTAAACTTTTTACCGTTTGTTAGTCCTGTTTCTTAGGTGCCCCTATATAGCTCGTGTTGGTAGTATGTTTATTTGTCAACAATGCAATGTTATTTTCCCNGAGTGAATTTGAACNGTTTGAAGTTTATATTTTTGCGTTTCAGG
Gma.17363.1.S1_at	AW471877	At1g35620	0.002	Protein Destination & Storage			TTGTGGTGGCAGTACTGATGCTAATTCAGACATTCAGTAAAGGAGGTGATGAATACCAGAGTGTACCCAATCAAGTTCAAACTGATCATGCAATCAGTTCTGTTTCTGAAGCNNNANNCNNNNNGTATAAACCTGGTGACAAGNAAGACTAAAAATTAACATAATACATTGATAATTAATGAACGTGGTCAGGAGTATTCTAGAAAGTAGCTGGCTTTAGAATTACCATACCTATTGGTATGAGTAAATATTTTGAGTTTGTGTATCTCCATAATTTTGAATACTGTTCAAACTCTTGCCTTTTGATTTACACCTTTCCACTAGTTATTTCTT
Gma.5649.3.S1_a_at	BM085101	At2g47470	4e-38	Protein Destination & Storage			ATCGGCCTCAGCAGACGACGTCGTTGTGCTCTCTGAAGATAACTTCGAGAAGGAAGTTGGTCAGGACAGAGGAGCTCTCGTTGAGTTCTATGCTCCTTGGTAACTTACCAATCTTCTCGATCTCTTTCTCTCTGTTTCTATCAACTATTTCTTATTCCATCGTTACTTTGATTTTTTGAAATCGTTATCAGGTGTGGACACTGCAAAAAGCTTGCTCCAGAATATGAAAAGCTTGGTAGCAGCTTCAAGAAAGCCAAATCTGT
Gma.3734.1.S1_at	BI469811	At2g38870	5e-15	Protein Destination & Storage			AAAAAAGATGTCGTCCGAGTGCAAAGGTAAGAGCTCATGGCCTGAGTTGGTTGGAGTGGAAGGAACGGTGGCGGTGGCTACAATTGAGAGGGAGAATCCTTTGGTGGACGCTAACACTGTGCTGAAAGGAACCATAGTCACCCCTGATTTCCGATGTGATAGGGTTTGGGTTTGGGTCACCAAAGACGGAATTGTTTATCAGGTTCCAACAATTGGATAAGAAGTGTTTACACTAAAGCACACTTCATATGATGATCTAAGAAGTCATGA
Gma.6057.1.S1_at	BI968398	At1g05820	7e-28	Protein Destination & Storage			TATTTGGGACTATACCTGATGAACGGAAATGGACAACCTGCACTTCTCTACCTTGTTCCATGTACACTAGGTGTCACAGTCATACTGGGATGTATAAGAGGTGAGTTGGAGAGCCTTTGGAATTATGGCACAGACTCATCGTTGTCCACAGAGCCCCCTGGCTCTGAAGTTTAAATGATCACGTTATTCATCTTTTGAGGATTGAAGAAACTGAACTGCAACTTTGGGAAATGTTCTCAGCTCAGTGGTTAGGAAAGAAAGACACCAGGTGTACAGGCTCCGTAACTATCTTCTGTATTAATGCTTGAGTGCTCTTTATGGCTGCGTCATATTATACTACATTTCTCTTGTAAAAAGGATGAAAAGCAGATGGAAAAGTACGTATTCAAAATTCACCAT…
Gma.1066.1.S1_at	BG363651	At3g13670	0	Protein Destination & Storage			GGTGATGTCAAAAGGCACACAGTATACACAACAATCATACAAAGTAAGTGACTCATTCCCATTCAAATGGATAAACAAGAAGTGGAGAGAAGGTTTTCATGTGACNTCAATGGCNACTGCTGGAAGTCGTTGGGGTGTTGTTATGTCNCGAAATGCNGGATTCAGTGATCAGGTTGTTGAACTTGATTTTCTCTATCCTAGTGAGGGAATCCACAGGCGATGGGATAATGGTTATAGGATTACAGCAACTGCTGCTACATGGGATCAATCTGCTCTTATACTGAGCATTCCTAGGCGCAAGCCCGGAGATGAAACCCAGGAAACTCTGCGTACATCTCAATTTCCAAGCACACATGTTAAGGAAAAATGGTCAAAAAACCTTTACCTTGCTTGTTTGTG…
Gma.7789.1.S1_at	BI321596	At4g05320	0	Protein Destination & Storage			GAAGACTTTGACAGGCAAGACTATTACCTTGGAAGTTGAAAGCTCAGACACAATCGATAATGTCAAAGCAAAAATCCAGGACAAGGAGGGTATCCCACCAGACCAGCAGAGGTTGATATTTGCTGGGAAGCAATTGGAGGATGGAAGGACTCTTGCTGACTACAACATTCAGAAAGAGTCTACTCTTCACCTTGTGTTGCGTCTTCGTGGTGGGTTTTAAAAGTCTGAGAATGTTCTGTAGGTGTCTTGAAGTCTAAGCATGTGGAAGTTCCGAAGATCTTT
Gma.7789.2.S1_at	BG653902	At4g05320	0	Protein Destination & Storage			AAACTATCACCTTGGAGGTTGAAAGTTCAGACACAATTGATAATGTCAAGGCAAAAATACAGGACAAGGAAGGTATCCCCCCAGACCAACAGAGGTTGATCTTTGCTGGGAAGCAACTGGAGGATGGAAGGACTCTTGCTGACTACAACATTCAGAAAGAGTCTACTCTTCACCTTGTCTTGCGTCTTCGTGGTGGGTTTTGAGTTTGAGAATGG
Gma.3541.2.S1_a_at	BI094890	At3g22480	4e-40	Protein Destination & Storage			AAAGCTGAAGGTGGCAAGGAACCAATAAATGAACAAGCNGTAGCAAATATGTATGNTNNAATGAGGTCTGAGCTCAACCAAATTTACTCCAAAATAACTGAACTGGAGATGGAAGTTAGTGAGCACACATTGGTTACCAATGCCATTCAACCACTTGACCAATCTAGACGATGCTATCGTATGATTGGAGGGGTGCTTGTGGAGAGAACCATCAAAGAGGTCTTGCCTGCTGTGCAGCGAAATAAAGAAGGACTCGAAGAGGTTGTGGCAAGGCTTAACGAGGCGTT
Gma.13364.1.A1_s_at	BI969885	At2g43070	0.01	Protein Destination & Storage			CCTTTGGAATTATGGCACAGACTCATCGTTGTCCACAGAGCCCTCTGGCTCTGAAGTTTAAATGATCACGTTATTCACCTTTTGATGATTGAAGAAGCTGANCTGCAACTTTAGGCAAGNNAGACNCCAGGTGTACAGGCTCCGTAACTATCTTNTGTATTAATGATTGAGTGCTCTTTANNNCNNNGTCATATTATACTACATTTCTCTTG
Gma.10984.1.S1_at	BQ295988	At1g21750	1e-168	Protein Destination & Storage			AAACGGGAGCTTTTGCTTGGTGTAGTAGAGTTTAGTGCAGGGAAAGGTGTAGCTGGGATCCGAGTTAAATTAATGGATGTTTTTAGATCACCCAGTANNNNTAGTCTCTAGATATCTTAATAGTAATTTTAAGTTTCATATCGTGACGTATGTTATGATATAAAATTTTCAGNTAANNNTGTTTTGCAAACCCNGTTAGTAGTTGCTCTGTATTTCTCCGTGTTTGGCCTTATACAGTTAT
GmaAffx.69694.1.S1_at	BQ785570	At4g28940	6e-25	Protein Destination & Storage	Storage Protein		AAAGCTTACAGAGAGTTTTTGCACTCTAAATTTGATGTCACTGCTATTGACATGGAAAGTGCCGCCGTTGCTTTAATCTGTCTCCAACAAAAGAAACCCTTCATTGCCATTAGATCACTATCTGATTTAGCTGGTGACAGTTCTACTTTGTCTAATGAAGTGGATGTGTTTGCCTCGTTAGCATCGCAAAACGCTCTAGATGTTGTTGTCAGATTTATCTCCTTATTAAATCAGTAGCTCTAATGTGTTTCTCA
GmaAffx.53993.1.A1_at	BQ628559	At3g61540	5e-83	Protein Destination & Storage			GCCAGAGAAAGACTCCCTGTACTTTTTACAGGAGAGATGATTTTCCCATGGATGTTTGATGAGATTCATGCATTGAAACCTTTCAAAGAGGCAGCTCATATATTGGCAGAGAAGAAGGACTGGCCCCCACTATATGATGTTCAGGTTCTGAATAACAACAAGGTACCTGTTGCGGCAGCTGTGTACTATGAAGACTTGTACGTGAATTTTAAGCTGGCCATGGAAACAGCTTCTCAAATAGCAGGGATTAGGCCATGGATAACTAATGAGTTCATGCATTCTGGCTTGCGTGATGATGGGAGCAAAGTTATTGATCANTTGTTGGGGATGCTAAATGGAAGGAAACCTCTATTTTGATCACCATTNNATNCNTGTTTGNAAANNCNGTTGANAAATAAG…
Gma.7635.1.S1_at	AW310136	At2g41790	1e-146	Protein Destination & Storage			GTTCATTTAAAGGACTTTCTGGGCAGATGAAATTATAGCNAGTGCATCCTCCAGGTTTATAAACTTCCNCACNTTACAGAAATAATTTAAATGAAATATCACCTGTAATATTGGGCACTCTCATAATAGCTTGGACAAAATGTTCCCTTTTCAGTTCATGGACGTGCTAAGTGCTATTCATCTGGATTTGAAATGAGTGATAACTTACATGAGCAGAATTATATGAATCTCATTTCTGGTATGAGTGGCTTATCAAATCATTTTGTAATATTATATAATCGTTATACGGTTATAAACACTTTTATTTGCTCTATATGCACCGACTTACTGTGATTTACAAGTTAAAAATCAGTTTAGACAATTATGAGGGCCAT
GmaAffx.83218.1.S1_at	BQ628574	At4g20070	9e-20	Protein Destination & Storage			TTGGTTTTAGTTATCCTGTTATCAGGAAACGGCTCCAAGTTGTTTATCATGTTCTTTGCCACTGTCAAATTAAA
Gma.6719.5.S1_at	AW598355	At3g25230	2e-80	Protein Destination & Storage			GTTCATAGAGTACGATACTGCCTTTAGNGAAGAGGAGAAGAAGAGCTCCAAANCCTTGAAGGTTGCCTGTAATNTAAACAATGCAGCATGCAAGTTNAAATTAAAAGATTANAAACAAGCAGAGAAATTGTGCACAAAGGTACTGGACCTTGAGAGTACTAATGTGAAGGCTCTCTATAGAAGGGCCCAGGCATATATCCAGTTGGCTGATTTAGACTTGGCCGAATTTGATATTAAGAAAGCGCTTGAGATTGACCCTAACAACAGGGATGTCAAGCTTGAGTACAAGACTTTGAAGGAAAAGATGAAGGAGTACAACAAAAAAGAGGCAAAATTTTATGGAAATATGTTCAACAAACTGCACAAGCTAGATTCTCTTGACAGTAATAAACCAGCGTC…
Gma.9631.5.S1_at	AW156269	At4g32420	8e-22	Protein Destination & Storage			GAGACAGCAGGTCCAGGTCATCGTCCAGAAGCCCNGATGGAAAGNAAGGCTTGGTCTCATATGGCGATGGTTCTCCATACTAANGTGAAAGGTGAAATATGTGGTGCNGAGGGCTTTGGGTNACNNTGTAANCTTNAATGAGNTGCAGGCTTCAATTTTTGAACTTCANCACCTGCATTGCTTGATGGAATTCGTGAATGAC
Gma.1352.1.S1_at	BM520240	At5g13120	2e-78	Protein Destination & Storage			GATATTGTTAGGTTGATCGAATCACAGGAGACAGATAGGGGTGACCGTCCTACAAAGAAGGTGACCATCAGTGACTGTGGTGAGCTTCCAAATGCTTGAGGTGGTTCTTGTGTAATTTTGTTGGTTATTCCTTCTATTAACTTGTTGAGTTGAGAAGGGAAAGAGGGGCGGGGAAGAAGAAACTTTGGCTTTCTTAAATTTTNGTCTGACTATTCTTAAAATATGTTCTGTAACACCTTATTTTCACACTGAACCTACAAACTTTTAGCAGCCACATGTATTCTGGTAGAACTATAGTTTGAGTTGTCGTCGGGTTGGACAATTTAATACCCCATTTGAATGGTATCTTCTTAAGCCAAAGTGCAGTTTCCATGGGGAATNNNANNNCTAGAGAATTAT…
Gma.12552.1.A1_at	CD391083	At2g36130	6e-25	Protein Destination & Storage			TTATCAAAAGACTTGGCAGCGTCCAAACAGATAACAACGACAGGCCCATCCATGACGTTAAGATACTACGTACCTCAGTCAAGGATTAGTAGTGGACCAAACNAAACATNAAGGCATTCGGCATTGCTATGACGAAGAATGTCAAGACTTGGCTTCGTGATTAATCTTCAGAACTGTCAGTTG
GmaAffx.70933.2.S1_at	AW156633	At2g38730	1e-30	Protein Destination & Storage			AAATGTGACTGGCTTGACAACAAGCATGTTGTCTTTGGGAGAGTGCTTGGAGATGGTCTTTTGGTTGTCAGGAAGATTGAGAACGTGGCAACCGGACCCAATAACCGGCCAAAATTTGCTTGTGTNANNNCNGNANGNGGTGAAATGTAAATTTTAACCCAACTTGGCTAACAAACAATAGTTCTCTTAGCAAAGTTGATTGAATCCTCAGCAGTAACTGCACCTCCTATACAGATGTGGGCTTTCTACACATATTTCCGTGGCTTGAAACTAAATATTCTTGTCATGGGATT
Gma.11072.1.S1_s_at	BE661461	At5g58710	3e-94	Protein Destination & Storage			GAAGCTGAAGGAACACAAAGTGGCACTCCCAAGAGCAAGGTTGTGATTGTTGACAGTGGTGAACTCCCTCTATAATTGTACTTCNTTGATTCTCAANCAGGACTTGTTGAAGGTGTTCCCAGTTTTCATTTCAATTCCATCTACGAGACTACTTATCTTTTATAAGCATGTTCTAATAGATCAATGACTAGTTG
Gma.10742.1.S1_s_at	BE659530	At1g51980	1e-165	Protein Destination & Storage			GGGATGTCATGAATGTGCCAAGTTATGAATCTGTTAACAGCAAGTTCCATGCAAAATGAAATTGCATGTGATCCACCNNNNGCTCATNATATTTTCTGGATCACAAGCATGCCTACTTCNAATTTTCNAGAGCAATATACACCGAATCAGCAATGCTGAA
GmaAffx.92767.1.S1_at	CF808492	At3g16480	4e-06	Protein Destination & Storage			GCATGTGATCCACCAGCTCATTATATTTTCTGGATCACAAGCATGCCTACTTCAAATTTTCGAGAGCAATATACACCGAATCAGCAATGCTGAAAATAAATCCCAGAGAAGTTTTTGTGCGGACCTGAGGAACCATTTATTCTGGTTCCATGTTTTTTTTAATTTTTTTTTATATAACGATTTGCCTTAGTGTATTAGGTGCATGGTCTCATGACTAATGCTCAC
Gma.1751.1.S1_at	BE473710	At3g02090	0	Protein Destination & Storage			GCTGTTGTCAGTGATGTAATTGGCATCCTTCGCAATTACTCATTCCTGTTGAAAATGGTGTTTACTTA
Gma.1751.2.S1_at	AI443536	At3g02090	1e-177	Protein Destination & Storage			CAGTACGATTAAACGTGTTGCCAATCGATTTATCTATGACAAGGATGTTGTTATTGCTGCCATGGGTCCTATTCAGCGTTTGCCTGATTACAACTGGTTCAGACGTAGAACCTACTGGAACCGTTACTAGTTCATTATAGTTTTTTTTTTTNNGCCTCATTTCAACTTCATGGGAGGTCTGGCATAATGTTTTATTCTAATTTACAACATTTATGCCTCTGTTTTTCATT
Gma.17631.1.S1_at	U08383.1	At5g42020	0	Protein Destination & Storage			AAGATCACCGATTACAAACGAAAAGGGACGTCTTAGCCAGGAAGAAATTGANAGAATGGTTCGNGAAGCAGAAGGAGTTTGCNGAGGAAGACAAGAAGGTGAAGGAGAGGATCGATGCTCGCAACAGTCTTGAAACCTATGTATACAACATGAAGAACCAGATCAGTGACAAGGACAAGCTCGCTGACAAGTTGGAGTCTGATGAAAAGGAGAAAATTGAGACTGCTGTGAAAGAAGCANTGGAATGGCTGGATGACAACCAGAGTNTGGAGAAAGAAGATTATGAAGAGAAGCTGAAGGAGGTTGAAGCCGTTTGCAACCCAATCATTAGTGCTGTGTATCAGAGATCTGGAGGAGCCCCAGGCGGTGGTGGTGCATCAGGCGAAGAAGACGAGGACG…
Gma.8123.1.S1_at	AF243380.1	At2g02380	1e-73	Protein Destination & Storage			AATTGGTTTCGGGTGTATGTCTATAAAGCCTTATGTTTATTTTCCATTTCATATTCTTCCCAGAATCCCAGTCAATGTAGCTTGAT
Gma.1082.1.S1_at	AF243374.1	At2g29420	1e-51	Protein Destination & Storage			GCAGCTGGCTGCATGTCTCTTTGGTTCAGTGTCCTGGAAGAGCTTGGAGAGATGGAGCTACTCAATGCTGAGAGGTTCCCTTCTCTTCATGAATGGAGTCAGAACTTCTTACAGACTTCACCTGTCAAAGATTGCATTCCATCCAGGGAAAGTGTGGTTGAATATTTCAGCTTTGGCATCAACTATGTGCGTTCCTTAGCAGCATCCAGTAAATCTTGAAACTGAAAATATACCTTTAATCAACTACATGCATCATTTATAATTGTTCACATTGTTTGTATTGGAATTGGAGTTTGGCTTCAAATAGTGTTGGTTATCTTATCATATGTAGTTGTGTGAAATGTGTAATCAGTTTTCTGTGCAATGGTGGCACTACTAGCTATAGTGAAATTTTCAGTT…
Gma.1502.1.S1_at	AF243369.1	At2g29420	1e-51	Protein Destination & Storage			TTCGCTGAGCAAAAGCTTTTAGATGCAGCATGGATTGGTATGTATAGCAGCGGGGATGAGCAGCAAAACGCTGTGAAAGTAGCCAGAGAAGCAATAGAGAAGATAGAAGAAGAGATTAAGGGGAAGAAATATTTTGGAGGGGAGAATATAGGATACCTTGACATTGCACTTGGATGGATCTCTTACTGGCTTCCTATTTGGGAGGAAGTTGGATCGATACAGATAATTGACCCATTGAAATTTCCAGCCATCACTGCATGGATCACCAATTTTCTTAGCCATCCTGTGATCAAGGACAACTTGCCCCCAAGAGACAAGATGCTTGTTTACTTCCACAGTCGCAGAACTGCGCTTTCTTCAACTTTTCAGGGCTGATTCAAGTTTTAATTTGGATCTATA…
GmaAffx.17961.2.S1_at	BG511562	At1g16030	1e-25	Protein Destination & Storage			CAAGCATGGGAGGTTGAGTCCTGAAGAGATGAGGAGAATGGTGAGAGATGCAGTGAGGTATAAGGCAGAGGATGAGGAGGTGAGNAACAAGGTGAGGNNNAANAACTTGCTTGAGAATTATGCNTTTGAAATGAGGGACAGAGTGAAGAACCTTGAGAAGGTTGTGGAGGAGACCATAGANTGGCTTGACAGAAACCAATTGGCTGAAACTGATGAGTTTGAGTACAAGAAGCAGGAGTTGGAAGAAAAGTTTCGGAAGTTTAGGTAATGGTAATTCTTGGTAGAACAAGTTTTAATGTTGAGTCCGAAGCAATGTAAAATAGTTCCAGCTTCTTTACTCAATCTAGTTGTCAGAGTGTGTATAACTGGTTTGTGCTTTATGTCTAAAATGTGAAAGTA…
Gma.11115.2.S1_s_at	BU764731	At3g12580	0	Protein Destination & Storage			TTGTTCTTGATTTTGTCAAAGACCCTTTTGAAGTTTAGATAACAGCGTGTCATTATGTTTTTATTGCGATTTTATTTTTCTCTT
Gma.5024.1.S1_at	AW310126	At4g16660	8e-40	Protein Destination & Storage			GAGAATTCTGATTCTAACTCAGCTGATAGTTCCTCTTCAAGTGATTCATCCGTTAACAGTTCAGAAGGCACAAGCGAAGAGACGGTAACTGAGCAAACTGAAGGTCATGATGAGCTATGATTAACCTGGCATACATGTTAGGCCGGTTTGAATCATCTACCTGCAACGTTTTTATAGTCAGAGATGTAGACTGGTAATGGTAGAATTAATAGGTGAAAAGGAGGCAGTGTCGGTTCTCGGCGAGCAGGAGAATAGAGTTGAGGCAACATTTGCTGGTTGAGTTCTAAAATTTTGAGGTTAGATGGCTACTACTGTAGTAGATGATTTATTACCCTTTTATATTTAAGGGGGCAACTTGTAATTTGCAGTCATATGAAAGCTTGTATTTGCCGAAACACA
Gma.17525.1.S1_at	BG839191	At5g56030	1e-150	Protein Destination & Storage			TGGATTTCTGGCGTTTTCTGAAATTCATGATAANNNNNNNNANNNNNTTGCTAACTTGAACATGATCACATCTTTAATCGTG
Gma.8966.1.S1_at	BU765374	At1g56630	7e-08	Protein Destination & Storage			GATGGTTTCTATTTGCTTTCAGGACAATAGGGTTAATAATTCCTGGGGTACCTGCTCATGGTCCACAAGATTACTTTAATTCTACCCTTTTAGGAAAGATTGAAAAACACTTCAAAGTAGAGTGATGCGCATGAAGATGGATGTATCAATGTTTTAAAAGTCAAATTTGAAATCGAAACAAAAAGACTATACGTCGCGGTTTAATTGGTTCAACTAGCCAATGTTGTTTTTAAATTAGAATCAAACTAGATAAATAACAAAAGGCAATGGGACCAAAATATTGTTAAGGTTCAGTTAGGATTAGTTAATTTCTAGCTTATAAG
GmaAffx.19743.1.S1_at	BU544499	At5g02880	1e-47	Protein Destination & Storage	Ubiquitin Degradation		AGCAGTCCTCCCATTATTAATTTGTTGGAGATTGTCCGAGAGTTTGATAATGANCAGCGACGAGCATTTCTGCAGTTTGTGACGGGCGCNCCTCGCCTTCCTCCGGGAGGATTGGCATCTCTCAATCCGAAGTTAACTATTGTNCGAAAGCATTGTAGCAACCGGGCAGACACAGACCTACCTAGCGTGATGACTTGTGCAAATTATCTCAAGCTNCCTCCGTACTCATCAAAAGAAAGGATGAAAGAGAAGCTCTTGTATGCCATNACNGAGGGTCAAGGATCTTTCCNCCTTTCATAATTGCACTCTCTTNACTGGTCCATANTTGAANNNTNATNNANATGTAATTATTANGGTAATTGATAGTTATGTAGATAAGGGTGCTAGTGGCTTGCTGGC…
Gma.855.1.A1_at	BE822234	At1g51760	3e-30	Protein Destination & Storage			GCATGAACATTTTGGGACTGTTGCGGTGAATTTGCTTGGCATCAATAAAGTTAATGACATGCCACCATTGATGGGAGCTGAAGACTTTTCATTCTATCAAGAGGTTATGCCTGGCTACTTTGCCTTTATTGGAATACAGAATCCCTCACATGAAAAACTGGAGCAAGTACACTCACCCTATTTCAAGATCAATGAAGATGTGCTTCCTTATGGGGCTGCACTTCATGCCTCATTAGCTGTTAGTTATCTTCTAAAACATCCGCAGGATGTACCGTCTGCA
GmaAffx.57967.1.S1_at	AW102170	At1g44350	6e-24	Protein Destination & Storage			GAGTTCTGTGGCAATGAACATCCCACAATCCCTCCAACCACAAATGATGTGAGAATATACCAACTAGCACGGCAAGTGTCTAGCAAGATTGTTGGAGAAGATAACATANAATTAGCACCCCTCTTCACANGGAGTGAAGATTTTGCATTTTACTTGGAAAANGTACCCGGGTCATTTGTTCTTGTGGGCACACGAAACNAGAAGAGTGGATCCATACATCCTGCTCATAGTCCTTACTTTTTCATTNACNAAGATNTNCTTCCCATTNNGGCTNCATTNCATNCANCATTTNCTCTTTCATACCATTCATATTCAAC
Gma.15530.1.A1_at	CD402825	At5g05670	1e-43	Protein Destination & Storage			GCTTATTCTCTGCAACAAAACAGACAAAGTCACTGCTCATACTAAAGAGTTTATCCGAAAACAGATGNNGANGGAAATAGACAAATTACGGGCATCAAGNAGTGCAATATCAGCAGCTGACATNGCAAATGAGTTCACCCTGGGGGTACCCGGTGAGCCNTTTTTTTTTACCCAGTGCTCTAACAAAGTGACAACTGCAGANGCTTCTGGTTTAACTGGGGAAATATCTCAGCTGGAAGAGTTTATCAGAGAACATGTAAAGCNATAGCTGGATNTTGTGTTTAAACTTGCGGATTTTTGNTNGAANTGAATGAATNTGTAGNGTTGNTCTTCTTGGTTGNTATTTCTTTGATTTCAAAGAACTGTCTGGATAAGAAGAGGCAAAA
Gma.16462.1.A1_at	BE822196	At1g21760	4e-09	Protein Destination & Storage			ATGGATTATTTTGTACCTGGTTGAATTATTATGATGCCTCAGAATAGAATTGGTCCATTGTAAATAATCCATAACTTAAGNTCGTAGTCGTAGAATTTGTAAATTTATTTATTTGTATGTTTATGTGTAAGTATGGCGTGATGAGATTGATTTGGTTCGAGTTGCGGAATTATCCCTTTATTCTGCTTTATGCATCTGGATAACGGGAATAATCGTAATTTTTGTTTTGCAAATCATGGATTCGTTTGTTGAGGACA
Gma.14173.1.S1_at	CD417087	At2g25490	1e-118	Protein Destination & Storage			AAATGGCTGTTTATCTCTGCCAGCATAGTTACCGAGTTCTGGAGTTAGGTATTTTTCTTTCCAGTGTTGGCACCCGATGTTTTTAGCACTGTTTTGTATCGGTTTTGCCACCATGTGTGTCCTTGTCCTTGTTTCTTTGCAGCAGTACATGTATCGAGTCTTTCCAGTGGTGTTTACCCAATTTTTAACGTATTTGAGCTTATGCTCTGTACGCGATTTTTGGGTCTAAGTTTTAGTCAAGGGGCATGTTGAAGTTCCAGTTTATGTGGTGATGTTGTCCTGGTTACTTTGGCAGTTCTTCAGAGTTTTATGAAGCCTTTGTCATCGGGAGCTTTGGTCATGGCAGCAAGTTATTATACAGGTCTGTCGTCACAATCTTTTCCCTTTGGGGGATGGGTT…
Gma.2639.1.S1_at	BI968490	At2g25490	1e-102	Protein Destination & Storage			AATGGCTGCATATCTGAGAACATAGCTACCGGGTTCTGGAGTNTAGGAATCTTTGTTACTGGTGTTGGCACCTGATGTTTTTAGCTCAGCTTTGCATTGGTTTTGCCACCATGTGTGTCTTAGTTTTCTAAGTTTTTACAGCTAGCTGTACCACTGTATCAGTCTTTGTTTACCAAATGTTTCATGTGTTTGAACTATGTTCTTCACATGATGTTTGGGTATCAGTTTTACTCACAGGGCAGGTTAGAAGTTGCAGTGTCATGTGCTGTTATTAGCGTGGTTGCAGTTGTCAAGTTCGGTGTTATGAAGCCTTGTTTTTAGGGACTGGCTGTGGCAGCAAGTTATAC
GmaAffx.67457.2.S1_at	BE804564	At4g08980	5e-77	Protein Destination & Storage			CTCGATCGGCTACTTGAGATGCTTATCACAAGAAGTTGTGGAACCCTCCGCAAACTCAGTGTTTCTGGCCTCCAAACTGAGAGCATCTTCACTTTCATTGCTGAAAATGCCTGTTCCCTCCATACATTGCGACTGCCNNNGANCNNNNNGNNNGATTCCATTGTGGAACAGATTGCTGGGAGGCTTTCTATGATTTCTTTCTTGGATGTGAGCTACTGTATTAAAATTGGTCCCTATGCGCTTGAGATGATTGGCAAGAACTGCAAGCTTCTAGAAGGGTTGTGTCGAAACATGCACCCATTGGATACTGCGGAGAAGCCGCATCAAGACGATGAAGCATATGCNATNGCCTCCACAATGCCTAAGCTCAAGCATCTTGAAATGGCTTATCATCTTATC…
Gma.3177.1.S1_at	CD399870	At4g26780	2e-60	Protein Destination & Storage			GAAACAACTTGCAGAGGTACTCAAAAAGTTTGGTGTGNAAAAATTTGATCCTACAAATGAGCCNTTTGATCCACACATGCACAATGCCATCTTCCAAATCCCTGATGCTTCNAAGGCNCCTGGCACTGTTGGAGTTGTTCTGAAGGCAGGATATANGCTCTATGATCGTGTTCTTCGTCCGGCAGAAGTTGGTGTAACTCAAGAAGTGGAGGATAACNAAGCAGCTGANTGATNATGATGGNATGAAGAAATGCCTGAGCAGTGGTGGGTTCTTAGTGGATNNCATTCNATGTCTTTTTGCAATATGCTTCTCCTCAACANTAGTTTTGCTGGATGGACTGTATTTTGTCCTGCACGGAANGGACTATTCTTTTCTCCTATTATTCGGAGTTTTNTTTT…
Gma.11277.1.S1_a_at	CA802310	At1g78850	1e-41	Protein Destination & Storage			TTCTGATGAGAGTGAGTGCCAATTGCCTGAGAGATGTGGGAAATTTGGGTTGTGTGAAGATAACCAATGTGTGGCTTGTCCATTGGAAAATGGACTACTTGGTTGGAGCAACAATTGCACTGCCAAGGCTGTGACATCATGCAAGGCTAGTGATTTCCACTACTACAAAATTGAAGGAGTTGAGCATTACATGAGCAAATACACTACAGGGGATAGAGTGAGTGAGAGTACTTGTGGAAACAAATGCACCAAGGATTGCAAG
Gma.11277.1.S1_at	CA802310	At1g78850	1e-41	Protein Destination & Storage			GTGTGGGTTATTTCTACCACAAGGAGAATTCAAGGTGTTGGGTAGCTTATGATCTTCAAACCCTTACTAGAGGGGCCAATTCCTCACATGTGGGGTATATTAAGGTGCCTAATAAGTAAAATATTAAAACCTTGATATTGCGGTTTTATACAGTTTTACT
Gma.11277.1.S1_x_at	CA802310	At1g78850	1e-41	Protein Destination & Storage			TGATGAGAGTGAGTGCCAATTGCCTGAGAGATGTGGGAAATTTGGGTTGTGTGAAGATAACCAATGTGTGGCTTGTCCATTGGAAAATGGACTACTTGGTTGGAGCAACAATTGCACTGCCAAGGCTGTGACATCATGCAAGGCTAGTGATTTCCACTACTACAAAATTGAAGGAGTTGAGCATTACATGAGCAAATACACTACAGGGGATAGAGTGAGTGAGAGTACTTGTGGAAACAAATGCACCAAGGATTGCAAGTGTGTGGGTTATTTCTACCACAAGGAGAATTCAAGGTGTTGGGTAGCTTATGATCTTCAAACCCTTACTAGAGGGGCCAATTCCTCACATGTGGGGTATATTAAGGTGCCTAATAAGTAAAATATTAAAACCTTGATATT…
Gma.3293.1.S1_at	CD390735	At1g75950	1e-55	Protein Destination & Storage	Ubiquitin Degradation	SKP Family	CCTTCATGAACTTAAGAGCACTTTGAANTGTAAGTAATAGTTATGATGAGGGNTGCGTTGATTCTGACACGAGGGTTATTGAGTTCAATAACAGCCAACNNTTGGCTCCANATTTNTCATCCCGTNNANTANNNNATAATGTGTATATGCACCTTTGTAAAGGGGAGGTGCAGAAACAAGATTCGGAGACCATTTGATCATGTTTGCCAAGGTGGTAGGTAGCTCCATGTTTCATGGTCGATTCATATTACTTTTCATCACGTCTCACTAATCTACATTAATGTGTTACTTTCAGACTTTGTCA
GmaAffx.57556.1.S1_at	BE823008	At3g08970	2e-39	Protein Destination & Storage			AAATCAGGGATCCAGCAGCTCTAGGGACTCCATTTCCTATGCTCTCTTAGATGCTGCAAAGCAAAAATCATTTCTAAAGGCATTTGACAAAACAGGTTATAAATCATCAAATAATTTGTTGATTGCCTACAAACCTCGAAGAGGGAAGTATAGTATATTTATGGGTGAAATGACAATAGAGGAGATAGAGAATTTCATTAGCTCCGTTCTCAGTGGAGATGTACCCTTCAGAGAAGCAACACGGGGGAAGCCTGTACTAGAGTATTAGGTCATAAAAGTGGGTTTTGACTGTTATGGCTGCATGCTCATGTACAGAGTCAAGAGATACATAGAATCTTTTGTTTTTTTTTATACTATCAAGAGTACAAATGATCTAATTAAGATAACGGCACATAGGAT…
Gma.5202.1.S1_at	BI970179	At5g53150	5e-83	Protein Destination & Storage			GACCTCCTCCAGATAGCAACAGAAGCTAACGAGACAACGGATAATGCTTAGGAAGCCTGATGAAGAAACGAGGTCTGGTTCACCTGCTGTGAAATGGGAGAGAGAATGCTTCAAAACCTTGTAGAGCAGAAATGTTAAACGAGGGTAGTAAACAGATAAAGAATGATAAATGACAGTGCAAAGGATAGAGATGTTGGTGTGACTGATGATGCAATAGGCTTGAGAAATCAAAATGTAGATCAATGAAAATACACTCTTCCACGACTCTTTCATTTTTTTAAGCCTGACAGATATTCTATAGTGTCCTTTTTGTGTTATAAATGGATCGAAGTGATCCACAGCTTTTCGGTTTTTGTTGTATAATTTTCAGACATGTTATTCGTAGAATCGTGGCAGTTA…
Gma.12151.1.S1_at	BE820895	At5g48030	3e-66	Protein Destination & Storage			TTAACGTCAGCATTCCAAACAATCTGACAGAGAGNCANNNNGAATTGATTGAAGAGTTTGCCAAGGAAGAGCAAGGAGATTTTGATAAACAGAGAGTTGCATCTGCTTCTGGTTGAAANCATTGCAAGAGTTATTATCAAAATCATATGCTCAACTAGGCGGTTGTTGAAGTTTTGTAGGATTAAGGATTGGTAATTCTTTTCTTAATTCCTTCCACTTTTTCGAGTGTATGTAATATTTATTTCTCGTCCCAAGGGATGATCACAATTCAAAATTNTTTTGTTAGAACTTAGAAGGCAATCCCCTCATGCTCCTCTAGGCTAGAATTCTAGTCAGTGCTGTATATAGTTTCCTTATAACATAANAAANNNNNCAAGTCACTCAATGTGATTCTTTTTC…
Gma.2546.1.S1_at	CA783454	At3g62600	1e-111	Protein Destination & Storage			GGAGATCTTTACGTCACTTTTGAGGTTCTATTTCCCACGTCTCTAAGGGAGGAGCAGAAAACAAAGATAAAAGCAATTCTTGGTTAGAATACGAACAAGATAGGTGTTATTTCGCTTATTATGTCCTCAATGTAACATGGTTAGGTGGTTATAGTAAACGCATACCTTGGGCTTCTCGTCCATTCCCCTTTTTTTTNGTTAGTTGACAAATAGATACCTTTTNCCCCCGTTCGTAATGATGCGCATCCTGTAACTCTTGCCGTCCATTGAATTCAATTGCCTTCTTGGCGGTGCTATTTTGATACAAGGAAAATAACACTCGCTGAAAAGAAAAAGAAAATGCTTCCATTGTTTTGTACCGTGCCTGAAATCGTTCATCTTGTGAACTAAGATTAGATT…
GmaAffx.69311.1.S1_at	AW620208	At3g46230	4e-40	Protein Destination & Storage			GCATTGTGGATTGTAATTGCTCCAGTGATTGATAACTGTGTGGCTGTGTAATTCATGTGAATAAAGTCCTACCTTCAGAGTTCAGAATATAT
Gma.7766.1.S1_at	BU550058	At5g12020	8e-36	Protein Destination & Storage			CCTAACTCGTACGTTTTCGTGATCGACATGCCTGGCCTNAAATCTGGGGACATTAAAGTGCAGGTGGAGGACGACAACGTGCTTCTGATAAGCGGCGAGAGGAAGAGGGAGGAGGAAAAAGAGAAAGAAGGGGGAAAGTATTTGAGGATGGAGAGAAGGCTTGGCAAGTTGATGAGGAAGTTTACTCTCCCTGAGAATGCCAACACCGATGCTATCTCTGCTGTCTGCCNAGACGGTGTGCTCACTGTNACTGTCAATAANCTGCCTCCTCCTCAGCCCAAGAAGCCCANGACTATAGAGGTCAANATAGCCTGAATTCCAACTTCCAACGCTATCTATCCCTGTTTTTGTT
Gma.11131.1.S1_at	BI968388	At5g59720	3e-19	Protein Destination & Storage			CCGGCTTGGAATTCGGATTCGGATTCGGATCATCCGTGAACACACGTGTGGACTGGAGGGAGACTCCCAGAGCGCACGTGTGGAAGCTGGTGCTTCCCGGCTTCTCCAACGAGGACGTGCTGGTTGAGCTCCAAGACGAGAGGGTGCTCCAAGTCAGCGTGGAGAGCGGCAACTTCGTCACGAGGTTTAAGGTCCCCGACAACGGTAACCTAGAACAACTCAAAGCCAACATGCGTCACGGGGTTCTCGTTGTCACTGTTCCCAAGTTTCATCAACCCACTACTACTGCCCCTGCCAATAGGAATGTCAGGGAAGTTGAAATTGAAGGCACCGACTGAACCCAGTGACCAAAACGCTGTCTTTAATCATGTCTTGTTCGATGGAACTGTGTTTTCTTAT…
Gma.2587.1.S1_x_at	CD404912	At5g66140	1e-108	Protein Destination & Storage			CGTTGCTGAGATCGAAGCGGAGAAGGCAGCTGCAGAGGCTGCTAAGAAAGCCCCTCCTAAGGAGACATAATTTTCTGTTTTGTGTTATGCGAGCATTGTTCTTGCTAGGTATTGGCTGTACTCACTGAAGCTNAAAATTGATGCCATTGTGTCTGAGATTGATGCAAAGAAAACGGCTGCTGAGGCTGCAAAGAATACCCTTTCTAAGGAGACATGATTTTATGTTACTTTTATTTAGCTCGTGAATTGTTCTTGCTAGATGTTGGCCTAACTTAAAATGACTGCTTTATTGTTTTTGGGTACTGCCATTAGTGTTGGTCATATTTAATTGCATGTCATTATTATTGAAGTTCAATTGAGTAGGGTGATACACANCATCTTCATAGACAGGAGCTGGTT…
Gma.1756.3.S1_a_at	BE608520	At5g42790	2e-54	Protein Destination & Storage			TTGGTGTTTGAATCGTGAAAATGTTCAGAAACCAGTACGACACGGACGTGACGACATGGAGCCCGGCGGGGAGGCTGTTCCAGGTGGAGTACGCGATGGAGGCGGTGAAGCAGGGCTCGGCNGCGATAGGGCTCCGATCCAAGACCCACGTGGTCCTCGCATGCGTCAACAAGGCTAACTCCGAACTNTCATCGCACCAGAAGAAGATCTTCAAGGTCGACAACCACATCGGCGTCGCCATCGCCGGCCTCACCGCCGACGGCCGCGTCCTCTCCCGCTACATGCGATCCGAGTGCATCAACTATAAC
Gma.16887.2.S1_at	BG509166	At4g31300	1e-112	Protein Destination & Storage			GAAATGGAGCCCCACAACTCCTTGCTAGACATTCTTGGTGCCCCAGAGCCGATGAGCATGTGATGTGAAGAAGTTGCCGTGTTTCAGAAATGTTTCCTGATAGATTATATCTTGTCTTCTCTCTTTTATGAACTAGCTAACGATTTGTGTAGTCAATTACTTTGTTTGGTTGGATATTTTTGATGGTTGAGTTATATCCTTTTGTTACGTACCATGATTAACCTTTNTTTCCTTCATCATATAGCTCCAAAGTAACGTGTACTTTGGTGAATTGGTCTTGCATAGA
Gma.5810.1.S1_at	AW309249	At3g26340	1e-125	Protein Destination & Storage			GTTACCCCAAGCACCGTGGAACAAGAAATGGTTGAGGCNACTGGNGCTTGATGAAGNAACTCGTGGATNTNNNTTTNAGTTTCCTTTGCTTGCNAGCNTATTTTGAACCNNNNGNATGAAACTGATTACTTTATAATTGNAAATTGACANTAGTTTGATAAATACAAGTGCTGTCCTATCCTGTTGTGTTTTNNATCAANNNATATTTATCATNNAAAATGATAGATTAGAGCNCATNTATAATGTGNAGTGNTTTAAATNGGTAAAGCAGGTCAGANGNGTATTGCNNGNTNTTGCTAATGTAATNCATCTTGCGATTAATGGTTTTCGTGGCAACTTCTGAAAGTTNTACAAGAANCTTCCTAGGGAGAATTGTGGTTCAATGTCTTCGACTGATTG…
GmaAffx.90062.1.S1_s_at	CF805787	At1g53750	2e-93	Protein Destination & Storage			AGTTGTTGAGCTTCCCATGCTCCACCCTGAGAAATTCGTTAAGCTAGGAATTGATCCTCCAAAGGGTGTTCTTTGCTATGGTCCACCAGGGACTGGCAAAACACTTTTAGCTAGGGCTGTGGCTAATAGGACTGATGCTTGTTTTATAAGAGTTATTGGAAGTGAGCTAGTTCAGAAATATGTTGGTGAGGGTGCTCGAATGGTTCGTGAACTATTTCAGATGGCCCGCTCTAAGAAGGCATGCATTGTGTTTTTTGATGAAGTTGATGCAATTGGGGGTGCACGGTTTGATGATGGTGTTGGTGGTGATAATGAGGTTCAGCGCACTATGCTTGAAATTGTGAATCAGCTTGATGGGTTTGATGCTCGTGGAAACATCAAAGTCTTGATGGCAACTAA…
Gma.1686.1.S1_at	AW350956	At5g58290	0	Protein Destination & Storage			ATGGCAACTAACAGAGCAGACACCTNTGGACCCTGCTCTGTTGCGTCCTGGAAGGCTTGATCGTAANAATTGAGTTCCCTTTNGNCCTGATAGACGCCAANAAGAGGCTCGTATTTCAGGTTTGCACAGCCAAAATGAACTTGAGTGATGAGGTAGACCTAGAGGATTATGTTTCTCGTCCTGACAAAATCAGTGCTGCTGAGATAGCAGCCATTTGTCAAGAAGCTGGAATGCATGCTGTTCGCAAGAATAGATATGTCATACTGCCGAAGGACTTCGAGAAGGGTTACAGGACAAACGTGAAGAAGCCTGATACTGACTTTGAATTTTACAAGTGATGATGTTGTAGCTTTGAGATTGGTGTGTGTACTCGCGAAGTTAAATATACAGTGAAGGGGG…
Gma.1686.2.S1_at	BU544127	At5g58290	2e-50	Protein Destination & Storage			AGTTCCCTTTGCCTGATAGACGTCAAAAGAGGCTTGTATTTCAGGTTTGCACAGCCAAGATGAACTTGAGTGATGAGGTAGATCTGGAGGATTATGTTTCTCGCCCTGACAAAATCAGTGCTGCTGAGATATCAGCTATTTGTCAAGAAGCTGGAATGCATGCTGTTCGCAAGAATAGATATGTCATACTGCCAAAGGACTTCGAGAAGGGTTATAGGACAAACGTGAAGAAGCCTGATACTAACTTCGAATTTTACAAGTGAATTTGTACGCATGTTGATAAGTTTTCTTAAATATTACACACAATTTATTAAGCTTATACGCTATACCCAATAAGG
Gma.11232.1.S1_s_at	BI943460	At5g19990	0	Protein Destination & Storage			ATTGATATCCTGGATCAAGCCCTCCTTAGACCTGGACGGATTGACCGGAAGATTGAATTTCCAAACCCTAATGAAGAGTCTCGGCTGGATATTTTGAAAATCCATTCAAGAAGAATGAATTTAATGCGTGGCATTGATCTGAAGAAGATTGCCGAGAAGATGAATGGAGCATCTGGTGCTGAACTTAAGGCTGTTTGCACCGAAGCTGGAATGTTTGCATTGAGGGAGCGGAGGGTACACGTGACTCAGGAGGATTTTGANATGGCTGTGGCCAAGGTGATGAAAAAGGAGACTGAAAAAAACATGTCATTGCGGAAGTTGTGGAAGTGATTTTTATTTCATGTTTGTGGTGCACATTATTATCCTGCGAAGATGGGCAGCGAACACACCTTAGGGTTA…
GmaAffx.65487.1.S1_at	AW101035	At5g05780	4e-59	Protein Destination & Storage			AAGACGCAGCAAATCTCATCTCGACCAATCGAGAAGGTGGTGGTTCACCCTCTCGTGCTTCTCAGCATCGTCGACAACTACAACAGAGTCGCCAAAGACACTCGCAANNNNNGTCGTCGGCGTCTTGCTCGGCTCCTCCTTCAAAGGCACCGTCGACGTCACCAACAGCTACGCCGTGCCCTTTGAAGAAGATGACAAGGATCCTAGCATCTGGTTTCTTGACCACAATTACCATGAATCTATGTTTTCCATGTTTAAAAGANTAAATGCAAAGGAGCATGTTGTGGGGTGGTATAGCACTGGTCCAAAGCTGCGCGAAAATGATCTTGACATTCACGGCTTATTTAATGACTATGTTCCAAATCCTGTCTTGG
GmaAffx.88721.1.S1_s_at	CK606003	At1g20200	2e-93	Protein Destination & Storage			AAGTGGGCTGTGATAGTGCGTTTACTGTTGGGAGAAATACCTGAGCGGACTGTCTTCATGCAGAAAGGAATGGAGAAAGCTCTAAGGCCTTACTTTGAGCTTACAAATGCTGTGCGGATTGGAGACTTGGAACTGTTTAGGAATATTGCGGACAAGTTTGCCACTACCTTTAATGCAGACAGAACCCATAATTTGATTGTTCGTTTGCGGCATAATGTCATCAGGACTGGTTTACGCAACATCAGCATCTCCTATTCTCGCATCTCTCTAGCTGATGT
Gma.13205.1.S1_at	CD390316	At4g38630	6e-13	Protein Destination & Storage			TACAAAGGATCAAGGCAGCCAGTCAGACATGAGCAAATTGTTGGCCGATCAATCCTTTGTATCTTCTATCCTTGCATCGCTTCCTGGGGTTGACCCAAATGACCCTTCTGTCAAGGATTTGCTGGCTTCCATGCAAAATCAGTCTGAGCCTCAACAGAAGAATGACGACAAGCCATCAAACGAGGAGGAGAAGAAGTAATCTTTGAGAACCACTTTGCCCTGTATGGTTTTATTTTCTTGGTAGCATTCTTCGCGGCTGTTACTAATCGGGGGAACTATTTACGCATGTTTCAATGTGTCTCTCTGCACTTTAATTGGAACCAATGCATGTCTCTCGATTGAATATTGGATGATTTTTAACTTAAAATGTTCTTGATTATCATGCCTTGTTCTTGGTTG…
Gma.4383.1.S1_a_at	CD411135	At1g64520	1e-108	Protein Destination & Storage			GGATCTTTTGGCAAAGACTGTCAGAGATGAAATAGCTGGTTGCAGTGAGAAGGCCTATGACTATCTTTCAATTAAGGATGCTAAGCAAATGTTGCTGTTCTCCTCNGACCAGGAACTCCTTGAATATATTAAAGAGGAGCATCCTGAGTGGGAGATTAAGAATGGTAGTGTCTTTTTCCAAAAGGCAAAAGAATCTGCACCTTGCAAAGAAATACCCTCTCTGCAGCTCATCAACCAGACGCTTAGTTATGCTAGGGAGTTGGAGAGGATTGTCTGAGAAGAAATGCAATGGCGGCTTCTGTTCCCAAAATTTCTAGGTGTCTGGATAATAGTTGCTAATACTGTCTTTTGAAATTGTTCATTTCTGATTCAATGTGAAACTATAAAATTGTTCACCTC…
Gma.4383.1.S1_x_at	CD411135	At1g64520	1e-108	Protein Destination & Storage			GACAGTGCCACATGATACATACGTTTATTTNATGGATCTTTTGGCAAAGACTGTCAGAGATGAAATAGCTGGTTGCAGTGAGAAGGCCTATGACTATCTTTCAATTAAGGATGCTAAGCAAATGTTGCTGTTCTCCTCNGACCAGGAACTCCTTGAATATATTAAAGAGGAGCATCCTGAGTGGGAGATTAAGAATGGTAGTGTCTTTTTCCAAAAGGCAAAAGAATCTGCACCTTGCAAAGAAATACCCTCTCTGCAGCTCATCAACCAGACGCTTAGTTATGCTAGGGAGTTGGAGAGGATTGTCTGAGAAGAAATGCAATGGCGGCTTCTGTTCCCAAAATTTCTAGGTGTCTGGATAATAGTTGCTAATACTGTCTTTTGAAATTGTTCATTTCT…
Gma.4344.2.S1_a_at	BI700879	At4g24820	1e-153	Protein Destination & Storage			AAGCCATGGCAAAAGCCTTTGGAGTGACAGNNGATTTCATTGATGTGGAGCTATCACGNTTTATTGCAGCAGGGAAGCTTCATTGTAAGATTGATAAAGTTGNAGGTGTTCTTGAAACTAATCGCCCTGATGCTAAGAATGCTCTTTACCAAGCAACTATTAAGCAAGGGGACTTCCTATTGAATCGGATCCAGAAATTGTCACGTGTGATAGATCTTTAGGTCATTTTTTGCATTTTAGANTAAAAGTTTATTGGAAAGGCAGAGATAACGACAATTTCACGGTATTTTACTACGAGGGTGAGGCACGGCATTTCTGTAGTCCATTTGATGTGCAAATATGATT
Gma.4131.1.S1_a_at	BG507809	At2g27600	0	Protein Destination & Storage			GAACATTTGGCTCGCAAGACAGAGGGGTTTTCAGGTTCAGATATATCTGTCTGTGTGAAGGATGTTTTATTTGAACCTGTTCGCAAAACCCAAGATGCCATGTTTTTCTTTAGGAATCCTGAGGNTATGTGGATCCCATGTGGNCCAAAGCAACAGNGTNCAGTNCAAACTACAATGCAGGATNTTGCTGCGAAAGGACTTGCTTCTAAGATCCTNCCACCNCCTATATCGAGAACAGATTTTGACAAAGTACTTGCTAGACAAAGACCCACTGTAAGCAAGTCTGACCTTGATGTTCACGAGCGATTCACAAAGGAATTCGGAGAGGAAGGATAATTCTGACAGAATTTTTCTTCAACCATCTTCACTAGTTTAAACATGTTATGATTTGTAATTTAC…
Gma.3511.3.S1_a_at	AI443341	At2g28840	4e-06	Protein Destination & Storage			GGGAGCAGATAGACTTCAATTAGATTCTTCTGGGAAAATTACAGATGAAAAGCAATGATAAAGTGGTGGTGATTATTTTGATTCCAAGCCGGCAGNAAATTATATAAATGGTGGTTTTAATTTCTGTTTGATAACTGCCTATATTGGTATCTTATTTGTATTCATTTTCTCACAATTGTCCAAAGATCACTACGGTCATGAGAGACAGCTGCTTGTAGTCGGTTTGAGTTTTTTACTTCTGTAATCTGATTCTCAGTTGGAATTGGAGAATCAGAACAGTTATGTATTCCCCCCCAAATATCAAACATAGTATCCATGAGTTAAAGGTAGTTTTCT
Gma.17958.1.S1_at	BI969270	At5g60160	0	Protein Destination & Storage			GCAACCAATGTTGTCACATCCTTCATATTCAGGGAGATAGCATCAAAACATAAACTTCCCGTTCAGGACTTTGTGGTGCGCAATGACATGNNNTGTGGTTCAACCATTGGTCCTATTCTTGCTAGTGGCNTAGGTATTCGCACTGTTGATGTAGGTGCACCGCAGTTGTCAATGCATAGCATACGAGAAATTTGTGCTGTTGATGATGTGAAGNATTCATATGAGCANTTCAAGGCATTTTACNAAGAATTNTCTCATGTNGATGGTAAGATGGTCGTGGATATATAGGANTATCTCTAATCACGAAATCCTCATTNNNATCCTTTGCTCTAGAAGCTGTTGCTGAAATGGTCGTGTTTNGTAATTTAGTANCNNTATAATGCNGACNTTATTATNNNN…
Gma.2859.1.S1_at	CF922080	At1g62290	6e-62	Protein Destination & Storage			TTGACTATGGCAATCTCCGAGTTGGTTTTGCCAAAGCTGCCTAACAAGACATGTTGGAGATTATATAGGGCATGTTTTAATAAGCTCGTTANTGTATTGTAAATAAGCTTTCTGTAACTACTATGGCACAGGTTTACATTATAGATCNNNNGAATGTACTTGTGAAACTATGCACCTTGATGTATTGTGTNNNTGNATTTGAAGGGACCATTTTCATTAAATGTCANNNANAANNNNANANNATNTATTATACCCNNTATGTTATATGCCATGTCNNNGTNNNNNNCATGGATGGCCTAAAATTTCTGCTCTANNNAAANNNNNNGGCCAATGATGATGCTAATGGAATATGATGCACAAAGCATCTGATTATGAAAAATATTTAACCATTACTGATTT…
Gma.11023.2.S1_a_at	AW278528	At2g17760	2e-15	Protein Destination & Storage			GTTTGGGAGTCCTGAAAAGCAACAACGTGAATATCATAGGACAAAATTTCATGACTGGTTACCGTATAGTCTTTGACCGTGAGAACATGATTCTTGGTTGGAGGGAATCTAACTGTGAGTACAGTTCACCCCTATTGCTTCAGTACACTGCATCCTTTCTCCATTAATTATTCTTAATGAGACATGTTATTCACAGGTTATGATGATGAACTCTCTACTTTACCTATTAACCGATCAAATACACCTGCTATTTCTCCTGCCATAGCTGTGAATCCTGAAGCAAGATCAAGCCAGTCTAATAATCCTGTGCTGTCACCTAATCTCTCATTTAAGATAAAACCTACTTCTGCGTTTATG
Gma.7581.1.S1_at	BI969748	At1g10870	1e-158	Protein Destination & Storage			GATGAGGCTCACCATGCTGCTGATGCCAAAGGGCATCAGCATGGTCCTGAAGCCTGTCTGAAAGTTGAAGANACTACTGAGACAGAGAGGTGTTTCCGTGGATGGTCATTATTACATCTGGCATGTCATTCTGGCAGTGCACTNATGGTTGAGTTGTTGCTCCAATTTGGTGCTGATGTAAACATGTGTGACTATCATGAAAGAACTCCCTTGCACCATTGCATTACAAGTGGGAAAAATCAATTGGCAAAGTTTCTATTAAGAAGGGGTGCAAGGCCGTCAGTTAAAGATGCCGGAGGACTCACTGTACTTGAAAGAGCAATGGAGAGGGGAGCAATAACTGACGAAGAACTATTTATCTTGCTTGCTGAATGCCAG
Gma.8338.1.S1_at	BI893450	At5g51070	1e-74	Protein Destination & Storage			GGGTATTGTCCCTAGGAATCCATGTAAAGGTGTCTGAAGCAGTGAAGAACCTTGTCTGCCAACAAGGCTATAACCCCACATATGGTGCTCGCCCTCTTAGAAGGGCCATTACATCACTAATTGAAGACCCTTTGAGTGAGGCATTACTTTATGGAGAGTGCAAGCAAGGAGACACTGTCCTCGTTGATTTGGATGCTAATGGTAACCCCTTTGTTACAAATCAGCTCGATCAGATTGTCAACTTATCTGACTGACACAAGGTCATGCCTCTAATTATTGTATGTAAACAGTAGTATAGTATGATAGGTTATACACATGATGGAAAATATTTTGTCTCTTTGGTAGCATAGGTTACATGATTCTTATCATCTTATGTAATGAGTAAGCACACCACATCAA…
GmaAffx.72349.1.S1_at	BF424576	At5g23140	6e-52	Protein Destination & Storage			AAGACTCAGACTCAGTGCATTCGCTCCTACAGTCTGATCCCAATGGTGATAGAGCACTCTTCCCGAGGTGAGAGGGCATACGACATCTTCTCGCGCCTTCTGAAGGAGCGCATTATCTGCATCAACGGACCCATCTCCGACGACACTGCCCACGTCGTCGTTGCGCAGCTCCTCTTCCTCGAATCCGAAAATCCTTCCAAACCCATCAACATGTACCTCAATTCCCCCGGTGGCGCCGTCACCGCAGGGCTTGCTATTTATGATACGATGCAGTATATCCGGTCTCCAGTCAATACAAT
Gma.3179.1.S1_at	AW278252	At2g44140	8e-22	Protein Destination & Storage			TCGAAGCTCGCAGAAGAATCAAATGGTGCACCATTGTTTACTGTAACTCAGTCTCGGAGTTTCTCAAAGCAAGTCACCAGTAATGATGTGTCAGGTGACAACACTGGATTCCAAGAGGAAGATTTCCCTGGCATGGACCGTGGCAATGATACAGGAACCAATGAGGATGATTGGCAACTCTTATAAATGCGATTGCTGGACTATGACATGGATTCAAAGTACAGGGTCAAAAATTTGTTGCATGATTCTCATGGGCCTAATTGCCACTGCAAGTTTGGTTGATCCCTGGCATGGGGCTCCCCACTCTTCAAACATTGTTTAATAGTCGTGTAGAAAGTAATTTAAANTCATTATGATTCTTTGGCTTAAANTCATTTGCTCATTTGTTCNTATNAGCTA…
Gma.17905.2.S1_at	CD393233	At4g01320	1e-115	Protein Destination & Storage			CTTCAGCAATTGGTCAGCTTTGGTCTGAACCTAGTCAGCCGATCATTTGAATTTCAGGCTGATGGCTTTGCCAAGAAGCTTGGATATGCATCTGGATTACGCGGTGGTCTTGTGAAACTACAGGAGGAGAATCTGTCAGCTATGAATACAGATCCTTGGTACTCTGCTTATCAC
Gma.4814.1.S1_s_at	BE657319	At3g02530	1e-136	Protein Destination & Storage			GTGCTGGTGCATTTGAAGTTGCTGCTAGACAATATCTGATGAATGAAGTTAAGAAAACAGTTCAAGGGCGTGCACAACTTGGTGTTGAGGCTTTTGCTGATGCACTTCTTGTGGTGCCTAAGACACTTGCTGAAAACTCTGGGCTTGACACTCAAGATGTGATTATTGCCCTTACGGGAGAGCATGACAAAGGGAATATTGTGGGGTTGAGCCTGAACACAGGAGAACCTATAGACCCTGCAATGGAGGGTATTTTTGACAACTACTCTGTGAAGCGCCAAATTATAAACTCAGGGCCAGTTATAGTATCTCAGTTACTGGTGGTGGACGAAGTAATTCGTGCTGGACGTAACATGCGGAAGCCAACTTAAGTGTTCTTTCTTACTNGAAGTTTCTCTT…
Gma.8037.1.S1_s_at	CD405725	At3g11830	2e-35	Protein Destination & Storage			AAATCCCAAGTCTGAGAGTGCACAAGGAGATGCTGCTGCAAGTGCCATGGGCAGAGGTCGTGGAGGTGGATTCCGTGGTCGTGGACGAGGAATGCGAAGATGATGATGAGAAGTGTATTCTACGGGTTGAGTGTCTGTTCATTGTCTGTCTAATTCGTGAGGCCAATGCATGCTTGTGTCTTCTACTTGGTGTTGCTGGAAGCATGCCGATTTTTGGACCTACAAATCATGAAATGAAAATGTAATGGAGATTCTGGGAACATCATCTGATCAACCTAGGATAGCAATTTTCAAGCATTGTCTTTCTGACGATC
Gma.4039.1.S1_at	BI969363	At5g20890	2e-70	Protein Destination & Storage			CTGGAATTGATGTTATTTCTGGCTCTGTTGGAGACATGGCTGAACGNGGGATATGCGAAGCATTCAAAGTCAAGCAAGCTGTATTGCTATCTTCAACAGAGGCAGCTGAGATGATCCTTAGAGTTGATGAAATCATCACGTGTGCTCCGAGGAGGAGAGAAGACCGAATGTAAAATATNNTGAGGGTCCAACTTTGGATGATTGGGGTGCCAGCATTTTTTGGCGTAATATGAGTGCTGTGATATTTTGATATGGTGGTTGTAATTGGAAGAAACTTGGTTGTAATGCTAAAAATTTGTTAGGTAAATTTTGATTTGTTTTGGAACCCAGTCGCACGCCAGTGGATTGGGGTGGGTGGCGGAGAAATTTTACTTAG
GmaAffx.90585.1.S1_s_at	CF806310	At5g10770	2e-56	Protein Destination & Storage			TTCTACGGTCTCGATATTACTGCCATCGCCGTAGGCGGTGTCAAACTCCCAGTCTCCTCCTCCACCTTCTCCACCGGCGGTGCAATCATCGACTCTGGCACCGTGATCACCCGCCTCCCCCCAACCGCCTACGGCGCCCTCCGATCCGCCTTCCGTCAAGGCATGTCAAAATACCCCTCCGCCGGGGAACTCTCCATCCTCGACACGTGTTATGATCTCAGCGGTTACAAGGTGTTTTCCATTCCCACGATAGAATTTTCGTTCGCCGGCGGCGTCACGGTGAAGCTGCCTCCACAGGGTATACTCTTCGTGGCGAGTACCAAGCAGGTTTGTTTGGCTTTTGCCGC
GmaAffx.91690.1.S1_at	CF807415	At2g23070	1e-172	Protein Destination & Storage			TGTTCGTTCTTGACAGGGGGGCAACAGTCTGAACTGTTATTTCTGGTGGAACTTGCTTTTAGGTGATTCCCCTGTTCTGTTGTAAAACTCATTTTAATTAGCTTTTTGCATAATAGTTTTGTTTCTGGTTTTTTAAAATTATTTTTGGGTGGAAATTCAGCTCTCTACAGTTTTATTTG
Gma.5686.1.S1_at	CA935460	At2g44680	1e-103	Protein Destination & Storage			ACATTTCCACACCTCTTCTTGATGACTTATGGACAACTGAAGCCACAGAAACCAGCACAAGGCTATGTTCCNAGAGTTTTTGGGTTCAAAGTTCACAAGCCATAAAGCNGAAGTTGAAGCTTTCATGAAAGTAAAAATCTNCCCGTGTCTCATTTAACTCTTCNTTATGGTTCTCTTTGCAACANCNGGCNAATCATATGCTTTCCAAACCAGTACAATCTAGGCATCTGTTTTANTTGTTATAGGAGCTTGTTGTAAAGAAATATGCAGACATGNGAAGCAAGTGCTTAGTTTCAGCTTCNGATTCAATGAGNAAGTGCTTAGGTACTTGATGATACTTTTTAATGACTNTTTACGAATTGTATTCTTGCGATTAACTTAATATT
GmaAffx.13269.1.S1_at	BE822975	At2g44680	4e-55	Protein Destination & Storage			AAACTATGACTTTGGCCGATGTCCAAGAGTTTTCTGCTCTGGACAACCCTGCCTTCCAGTTGGCCAGTCAGATGTTCCTAGGTCAAGTACTGTAAAGATATATTGCCCCAGGTGTGAAGACATTTACTACCCAAAGTCCAAGTATCAAGACATTGATGGAGCTTATTTTGGAGCTACATTTCCTCACCTTTTTCTGATGACTTATGGGAATCTGAAGCCACAGAAGCAATCACAGAACTATGTACCTAGAGTTTTTGGTTTCAAAGTTCACAAGTCCTGAAGCTGGATGGAGTTTCAAGCTTTCATCAAAGTAGNAATCTGAGCATGCCTTGCTTAGTTGTATTTNCTTTAAAATTCAGTNNNNNNNNNNNTTCTGAAATCAGTACATTCTAGATCCAN…
Gma.10799.1.S1_at	BG237181	At4g26100	1e-163	Protein Destination & Storage			AGTTGATAGGCACTGCCAACGTTGCNTGTGTTGCTAAGTTGAGCTGTGAGNAAATTNGGATCTGAACTTGAAATTCTGNCTTTGTATTGTTAACNCATCTGGTCAAACCGATGAAGCTGTGAAGCTGAAATAATTTGAGCNNAANCNAGGGATTGTGCTTGCTGTAAAGCTCAGTTTTAATTGGNNCTNCTNGCTGGAACTCCTAAGTTTTATAACATNNTTTTCTGNNAGTTATTATATTGGNTTACCAGATGTTTACAGTTTCACGNNNNTGGACTGCAAATGTCAAAANCTATCAAATACCAGCAAAAANTGTAATTAGCCATTGTACTCTTGTTGGATAAGATTCCCTTGGTTTACACGATGTAATTGTCTGGCAAATATTTTGGTATTAGGAAC…
Gma.1067.1.S1_s_at	AW350176	At4g31180	1e-58	Protein Synthesis			AGCTCAGCGTGTTCATGTGCCAGAATTTTTGGAACAACGTGCAGCAGCTTGCGGCATNGATGTCAAAACAATATCTTCGTACATTGATTCTTTCAGATATGGNGCACCACCACATGGTGGCTTTGGAGTAGGGTTGGAGCGTGTAGTGATGCTCTTCTGTGGCCTGAATAACATTCGCAAAACATCACTCTTTCCTCGTGACCCACTTAGGATT
GmaAffx.90973.1.S1_at	CF806698	At5g56680	2e-63	Protein Synthesis			GGGTTTTGATAGTTATTTCATTTCTTTATCCTCCACTTTGATGCTGGTTGTTTTCATTCGTTTACAAACTCTGCTCTGCA
GmaAffx.93118.1.S1_s_at	CF808079	At2g40010	1e-123	Protein Synthesis			TGTGGAAATCATTACACCTGTGGAACTCATTAGGAAGGGAGACAAGGTTGGATCTTCTGAAGCTGCATTGCTTGCCAAGCTAGGCATAAGGCCCTTCTCATATGGGCTTGTGGTTCTCTCTGTTTATGATAATGGTTCAGTGTTCAGCCCTGAGGTTCTTGATCTTACTGAGGATGACCTCATTGGGAAGTTTGCTGCTGGTGTCTCAATGGTTACTTCACTTTCATTGGCTATTTCATATCCAACACTTGCTGCAGCA
GmaAffx.77719.1.S1_at	BI892705	At1g14320	3e-77	Protein Synthesis			ACCGGCGAGGTGTTACCGGCAGATAAAGAACAAACCGTACCCGAAATCCCGTTTCTGCCGCGGCGTGCCGGAGCCGAAGATCCGAATCTACGACGTGGGAATGAAGAAGAAAGGCGTGGACGAGTTCCCGTTCTGCGTGCACCTGGTCTCGTGGGAGAAGGAGAACGTCTCCAGCGAGGCTTTGGNGGNGNNGCGCATCGCATGCAACAAGTACATGGCCAAGTTCGCCGGAAAAGATGCCTTCCACCTGCGCGTGAGGGTGCATCCCTTCCACGTGCTCCGCATCAACAAGATGCTATCGTGCGCCGGGGCCGACAGGCTCCAGACCGGCATGAGGGGCGCCTTTGGGAAGCCGCAGGGGACGTGCGCTAGGGTTAACATTGGTCAGGTGCTGCTCTC…
Gma.16348.1.S1_at	BI786109	At1g26910	1e-115	Protein Synthesis			ACAGGAGGCTCTTCGTCGTGCTAAGTTTAAGTTCCCTGGTCGTCAGAAGATCATAGTTAGCCGGAAATGGGGTTTCACCAAGTTTAGCCGTGCTGATTATCTCAAGTACAAGTCAGAGAGCAGGATTGTGCCTGATGGTGTGAATGCTAAGCTTCTTGGGTGCCATGGACCACTGGCAAACCGTCAACCAGGACAAGCTTTTCTATCTAGTGCTACTGCTACTGCTTAGATGGCTTGTTACATGGAAACAGTGGGCTTTGACCACAATAGTTGTGTTTGACTCAATTTGAGTTTCTTAATTGCTCTACTCGTAGTATTAAACTATTAAACTATGTTAAGTTTATCTAATCTTTTATGAACCATCTTAAATGGAATGAATGTCATATTTTGTTGGTATTT…
Gma.10892.4.S1_s_at	CD403449	At5g45775	1e-83	Protein Synthesis			ATTTCAGGGGAGTGTTTTTATCAGTTTTGTCAACTATCTTTCTGGGATAGTATCTTAATTTTGAGGCAGGTT
GmaAffx.1642.1.S1_at	BQ252711	At2g37190	4e-12	Protein Synthesis			CGTTGATGGGAAGGACCCCAAGGATCTGCAGCAGGAGATTTCTGATGGAGATGTTGAGGTTCCTCTTGAATGAAGTTGCTGAAATTTCAGTGGTTTTTTGTTGTTTCGTTTATGTTGTTTTTTTGGGCAATTTTGGTTTTTTTTTCTTTTTATAAAGGAATTTGAGTCATAGGAATGGTATGATAGTTAAGACTTTGGTAAATGATATCACATTGTTGGGTTTTTGAGTAATTTTGTAATGGAGTTGTGATTTGTATTGTTGCCA
Gma.18037.1.S1_at	BU549263	At5g48760	1e-98	Protein Synthesis			AGATGCTCTGAAGGTGTTGAGACTTCAGAAAGGACACAAGTACTGCATACTGGGCAGGTTGTCATCTGAAGTTGGATGGAGCTACTATGATACCATCAGGGAGCTAGAAAAGAAGAGAAAGGAAAAGGCACANTTGGTTTATGAGAGAAAGAAGCAGCTCAACAAATTAAGGGTGAAAGCCGAGAAGGTTGCTGAAGACAAGCTCGGTTCCCNACTTGATATTCTTGCTCCAGTCAAGTACTGAGTAGTCTATGTTTTTAAATTTTTTTATGCANCTTATACCCANTTGAAACTACCTTTCAGTTTTGCTTGTTANNNGCTATGAAGTATTGACACCGATACGGACACCGGACACGGACACGTTGACACCTGTAATGTCCAAAATATAGAACGTAGTAT…
Gma.16202.1.S1_at	BI427211	At2g39460	1e-59	Protein Synthesis			TTTGGTTTTCATAGTCGACTTGCGGGCTGACAAGAAGAAGATCAAGGATGCAGTCAAGAAGATGTATGATATTCAGACCAAGAAAGTAAACACCTTAATCAGGCCCGACGGCACCAAGAAGGCTTATGTCAGGTTGACACCTGATTATGACGCCCTGGATGTGGCCAACAAGATTGGAATTATCTAAACTAATTCCTGGCCTCACCAAAGTCGATTTCTGTTTAGATGGTAGTTTGTTTTGTGAACATTGAGGGGAGACATTTGAAGGTTTTTTTTTTTTTTTTTGAAAGGGAGACATTTGAAGGTTAAGTTCTAAATTTTGCGGTTTGTTATTTGGTGTATTTTAGTTCAATTGGAATTATATTTACATTGTTACAATTTCAAATTTGATGAGTAAAT…
Gma.4021.1.S1_at	AW348942	At2g39460	2e-61	Protein Synthesis			TGTCACTTTCCACAGGCCGAAGACCTTGAAGAAGGACAGGAACCCCAAGTACCCTCGCATTAGCGCCCCGCCGAGGAACAAGCTTGATCATTATCAGATCCTGAAATACCCCCTCACCACTGAGTCTGCCATGAAGAAGATTGAGGACAACAACACTTTGGTTTTCATTGTCGACCTGCGTGCCGACAAGAAGAAGATCAAGGATGCGGTGAAGAAAATGTATGACATCCAGGCCAAAAAAGTGAACACCTTGATCAGGCCTGATGGCACCAAGAAGGCATATGTCAGGTTGACACCTGATTACGATGCATTGGATGTGGCAAACAAGATTGGGATTATCTAGGGTAGTACTAGTACTTAGGCAGCTCTATGGTTATTCTTGAAGAAAACTTTTTTAAA…
Gma.5741.1.S1_at	AW351098	At3g53020	2e-55	Protein Synthesis			GTGGACTGCAATGTACCGAAAGCAGCATAAGAAGGATATTGCTCAAGAAGCTGTGAAGAAGAGAAGACGTGCTACCAAAAAACCTTACTCTAGGTCTATTGTTGGTGCTACTTTAGAAGTTATCCAGAAAAAGAGAACCGAGAAGCCAGAAGTTCGAGATGCAGCTAGGGAAGCACAGCTTCGTGAAATTAAGGAGAGGATCAAGAAAACTAAGGATGACAAGAAAGCTAAGAAAGCAGAAGTTGCAGCTAAGTCCCAAAAATCACAAGGGAAAGGAAGTATTTCGAAGGGTGCCATGCCCAAAGGTCCCAAACTTGGTGGGGGAGGTGGGAAACGCTGAGCTTTTAAGTTTTGTTCTTATTTTTGGCTACANTTTAAATAGAGCTGTTTTGAAACTTC…
Gma.3966.1.S1_at	CA853710	At1g70600	2e-61	Protein Synthesis			CAACGTCGAAAAGCTATGGTCTCTCATACCCCAAGACGCGAAGGAAAAAGCCCTAAAATCGAAGGACACTGCCCCTCTAATCGACGTCACACAGCACGGGTACTTCAAGGTCCTCGGAAAAGGTGTTCTGCCCCAAAATCAGCCTTTTGTTGTTAAGGCCAAGCTTATTTCCAAGATCGCCGAGAAGAAGATTAAGGAAGCCNGGTGGCGCTGTTCTTCTCACCGCTTAGGTTTAAAAACTGTTTTTTAATTGTGTTGTTTTGTTTCGGATAACTTTTTTGATTATATATTGCAAGTGATACATTGTGTTTTTTTTTAGTGTTTTTGNTGTTGGATTTAGGTTGATTAAAAGGTTTATGCGAACAGTTTTGACCTAATATCCTAAAACCTTGTTTTAAT…
Gma.17555.3.S1_at	BQ743039	At4g18100	2e-56	Protein Synthesis			GAGAAAATGGCGGTACCTCTGCTCTCGAAGAAGATCGTGAAGAAGAGGGTGAAGAAGTTCAAGAGGCCTCAGAGTGACAGGAAAATTTCCGTCAAGACAAACTGGCGTAGACCAAAGGGTATAGATTCCCGTGTTAGGAGAAAGTTCAAGGGATGCACTTTGATGCCAAACATCGGTTATGGTTCTGACAAGAAGACCCGCCACTATCTCCCTAATGGTTTTAAGAAATTTGTTGTTCACAATGTGAAGGACTTGGAACTGCTCATGATGCACAACAGGACTTACTGTGCTGAGATTGCTCACAATATATCCACAAGAAAGAGAAAAGATATAGTTGAGAGAGCTGCGCAACTTGATGTTGTTGTGACAAACAAAACAGCCAGATTACGCAGCCAGGAG…
Gma.7306.1.S1_a_at	CD409753	At3g10950	4e-46	Protein Synthesis			CCAAGAGAACCAAGAAGGCCGGTATTGTTGGAAAATACGGCACCCGATATGGTGCTAGTTTAAGGAAGCAAATCAAGAAGATGGAAGTTAGTCAGCACAGTAAATTCTTTTGTGAGTTCTGTGGAAAGTACGCTGTTAAGAGGAAGGCCGTGGGTATTTGGGGCTGCAAAGATTGTGGAAAAGTGAAGGCTGGAGGTGCTTACACATTGAATACTGCGAGTGCTGTCACTGTCCGGAGCACCATTCGGAGGCTGAGAGAGCAGACTGAGAGTTGAAAGCA
Gma.16150.1.S1_at	CD399557	At3g60245	1e-43	Protein Synthesis			TCCAGAAACCATGACTAAGAGAACGAAGAAAGCAGGCATTGTCGGAAAATATGGTACCCGATATGGTGCTAGTNTGCGGAAGCAGATTAAGAAGATGGAAGTTAGTCAGCATAGCAAATTCTTTTGTGAATTNTGTGGNAAGTATGCTGTGAAGAGGAAGGCTGTGGGAATATGGGGATGCAAGGATTGNGGTAAAGTNAAAGCTGGCGGTGCCTACACTTTGAATACTGCNAGTGCTGTCACTGTGCGCAGCACCATCCGGAGGTTGAG
Gma.10596.1.S1_at	CD399436	At3g59540	4e-32	Protein Synthesis			TAGGGTTTATGAGGTGCACTTGCAANGNNNNNNNNNNNNNACATCACATTTCGTTGCGCCTNTGNTCTCTGTCACTGCTGCGTCTCTCGTAACCATGCCTAAGCAAATCCACGAGATTAAGGATTTCCTTCTCACTGCTAGAAGGAAGGACGCAAGGTCGGTGAAGATCAAGAGGAGCAGAGATGTGGTTAAGTTCAAGGTCAGATGCTCGAAGTACCTCTACACACTTTGTGTGTTTGACCCAGAGAAAGCTGATAAATTGAAGCAATCTCTTCCTCCAGGTTTGAGTGTTCAAGACCTGTAAAGGTACAGGGCGAGAGACCAAGAAGAAGCAATTCATTGATTCTTCTGAACTTCGTTTCTCTGTAGTTGAAACTTGAGATTCTTTTCAGTTTCTTT…
GmaAffx.12010.1.S1_s_at	AW568804	At1g74060	8e-08	Protein Synthesis			GGCCGGGGTGAAACCACATGAGCTAGTCTTCTAGAGGAAAGAGGGGTGTTACTCTTGTTTTTGATATCGTGTTTGTTTATTGATGCTGGTTCTTATAGTTGCCCTCTTATAACATTCTTGTTAGCAGACAAATGAAGAACCTAAAAT
Gma.11038.1.S1_at	AW350755	At1g80750	2e-60	Protein Synthesis			GAAAGTTCGGTATTGTATGCATAGAAGACATGGTTCATCAGATTTATAATGCTGGTCCACACTTTAAGGAAGTTGNNAGATTTATGTGGCCCTTTGAGCTNAACAAGCCAGCTGAAGGATTGAAAGGATCAAAAACCNNATTCAANGAAGNTGGAGACACAGGGAACCGTGAGGATCTCATCAANGAACTNATCAATAAAATGAATTAGTGGCCTTTTGTAGTATCAAAATTTTGATGTTTACTATGTCCATTGGATGATCCTAGGTGCAATATCTCATTTTTGAAGTAATCAATTTATTACCTAGAGAAACATTGCCACAGGTTCTTGTTATAGTTGAGTTTTAAGTGTGTATTTATCTTTACAGTCTTCATTTACTTATTGAATTCCATTAGGCATTG
GmaAffx.91862.1.A1_at	CF806742	At5g41520	3e-26	Protein Synthesis			CTCGCGAGTATGTGAGGGAGACTTTTGCTTGGATGCACTATTACTGGTTCCTCACCAACGATGGAATCGAGTTTCTCAGAACTTACCTTAACCTTCCTTCCGAAATTGTCCCTGCTACTTTGAAGAAACAGGCCAAGCCACCTGGCAGGCCCTTTGGCGGCCCATCCGGTGATCGCCCTAGGGGTCCACCACGCTTTGAAGGGGAGCGTAGGTTTGGTGGTGATCGTGATGGATACCGTGGAGGTCCCCGAGGAGGACCTGGTGGTGACTTTGGAGGAGACAAGGGAGGAGCTCCTGCTGACTACAGGCCCTCTTTTGGGGGTGCTGGTGGAAGGCCTGGCTTTGGTCGTGGATCTGGTGGTTTTGGAGCGCCAACCAGCTCAAATCTTCCCTAAGTAT…
Gma.1465.1.S1_at	CD416674	At5g23740	3e-66	Protein Synthesis			CATTATGTTTTTCGAATACTATTTGCCTTTTAATTT
Gma.15476.1.S1_at	CD415960	At3g52580	6e-59	Protein Synthesis			CATCACTGGCGGGATGAAGGTTAAAGCTGACAGAGATGAATCATCTCCATATGCTGCTATGCTTGCTGCGCAGGATGTTGCTGCTAGATGCAAGGAACTGGGCATAACTGCTCTTCATATCAAGCTCCGTGCCACAGGTGGAAACAAGACAAAAACACCAGGTCCTGGTGCTCAATCAGCTCTTCGAGCCCTTGCTCGTTCAGGAATGAAAATTGGTCGCATAGAGGATGTGACCCCCATTCCTTCCGATAGCACACGGAGAAAGAGTGGTAGAAGGGGTAGAAGGCTTTAAGCTTCTTATGGTATATGACTGGAGTTGCCATATTTTAATTTCCATGTCAAACAAACAGATTTGTGCCATTTTGAAATTTTCTTCAATCAGAACTTCTTTTGTATTTC…
Gma.18010.1.S1_x_at	CD398452	At2g09990	2e-70	Protein Synthesis			AGCAAGTGCAGTGCTTCGGGCGGAAGAAGACGGCGGTGGCAGTGACCTACTGCAAGCGCGGCCGAGGCCTCATTAAGATCAACGGCTGCCCGATCGAGCTGGTGGAGCCGGAGATCCTCCGCTTCAAGGCCTTCGAGCCAATCCTCCTCCTCGGTCGCCACCGCTTCGCCGGCGTGGACATGCGCATCCGCGTGAAGGGCGGCGGTCACACCTCCCAGATATACGCCATCAGGCAGAGCATAGCCAAGGCTCTCGTCGCTTACTACCAGAAGTACGTCGACGAGCAGTCCAAGAAGGAGATCAAGGACATCCTCGTCAGGTACGACCGCA
Gma.4710.2.S1_at	CD402482	At2g09990	6e-70	Protein Synthesis			GTTCTACCAGAAGTACGTTGATGAACAGAGTAAGAAGGAGATCAAGGACATTCTGGTGAGGTACGATCGTACCTTGCTCGTCGCGGATCCCAGGCGCTGCGAGCCCAAGAAGTTTGGTGGGCGTGGCGCACGTGCGAGGTTCCAGAAGTCTTACCGTTGAAGGAGAATGGTGGTGTTTTTGTGTTTTTTTGTTTTTGGTTCGGTTCATGTTTTATGCTGTGGAAAAAATGAAAACTTTTGTTGGTGGTTTTGGTAGTTTTATAATTTTGATCGTTTTTTTTATAATGGTTGGATTATGGATTCTTGTTTTGATTCAACTTTTTCTGTTTAGGTAATATGAAGGTACGGATTATT
GmaAffx.89533.1.S1_at	CK606509	At4g09800	8e-25	Protein Synthesis			GTATTCTCAGGTGGTGTCAAATGCACTGGATATGAAGTTGAGGGATGATTTGGAGCGCTTGAAGAAAATCAGAAATCACCGTGGTTTGAGGCACTACTGGGGTCTTCGTGTTCGTGGTCAGCACACTAAGACTACTGGTCGCAGGGGTAAAACTGTTGGTGTCTCTAAGAAGCGTTAAGCTGTGTTATATGTTTGCTTTGAGAAATAGATATTTGTTAGGGAAGCAAATTTTGAATTATGTTGGACAAGTTTCCATAGAACATAAATTTTATTGGTTAAGTGCTGTGATGCTTTCAATTTTTTTAA
Gma.15851.2.A1_x_at	CD392230	At3g56340	3e-33	Protein Synthesis			GGAAGCCTGTGTCTATGAACAGTACACGCTTCCGAAACTCTATGTGAAGATGCAGTACTGTGTTTCCTGTGCTATCCACTCTCATGTTGTGAGGGTTCGATCCCGCACTGACAGGAGGAAGCGTGACCCTCCACAGCGATTCATCAGGCGCAGGGATGATGCACAAAGGCCCGGTCAGCCTGGTCAAGCACCTCGTCCTGCTGGCACAGCAGCACCTGTCCGAACCTAAAAACAAATCCCAAGACAAAGCCTTGATGTTATGCTGACCAACCATATCCTAAGAACAAATTTGTTGCTGCTTTATTTTTGAACATCAGTTTTGTGGAGGGGTATTTTATTCTGATTATCTACTATAGTCGTTGGATAGTATCTTTCTGGTTATAATGGTGGCTATTTTTG…
Gma.11190.1.S1_at	CD402535	At5g35530	1e-106	Protein Synthesis			ACGATCCACACCCCCAAGGAAGAGGAAGAATATGCCCGGCCTGCTGCTGTTTTGGCAACTGATATTGAGGTCCCTGTTGCTTGAAAATGTTTTATTTGTTCTTGAGTAGAAATTCATAGCACCTGAGTACCTAGTATGCAGTGTTCATTTGCTTAGACCTGGTCAGATTTTTGTAGTGTCTTATCTTTGTTGGGAAAGACTAGTTAAATTTTTTTGTAGTTTCTTAACAGTTTATGAAATTGCTACAAAGTGCCAAGTATTTTAAGCATCAATT
Gma.9006.3.S1_x_at	BU926695	At5g35530	1e-113	Protein Synthesis			GAGAGCCCAGAGAGCCAAATCTATGAAGTTTAAGGATGGTTACATGATTTCTTCTGGGCAACCTGTCAAAGATTACATTGACTCTGCAGTGAGACATGTGCTCCTGAGACAGGGTGTTCTTGGCATTAAGGTGAAGATCATGCTTGATTGGGATCCTAAGGGGAAACAGGGTCCTAAAACTCCCCTCCCTGATCTTGTCACAATCCATTCTCCAAAGGAGGAAGAAGAATACATCCAGCCTGCTCCAGTTTTGGCTGCTAATGATATTGAGGTCCCTGTTGCTTGAAAAGTTATACACTGGAGAAGTAATTCATAGTAGCTGAGTGCCTAGTTTTTCTTGTGTGCAATGTTTGTTGTCAAAGACATGTTCAAAATTTTGTAGTTTCTTGAATTTTGAAG…
Gma.11295.2.S1_x_at	BE209656	At5g56670	9e-23	Protein Synthesis			CGATCTCGTTCTGTACGTGCAGCCGCAGCAAGTGATCGAAGCGAAAAGAGAGAAATTCATCGTCGCAGTAATCATGGGTAAGGTTCATGGATCACTTGCACGTGCTGGTAAGGTTAGAGGGCAAACCCCGAAGGTGGCCAAGCA
Gma.10679.1.S1_at	CD391962	At2g37270	1e-101	Protein Synthesis			GATTATCAAGCATGCAATGGAAATTATTCACTTGCTCACTGACCTGAACCCAATTCAGGTCATTGTTGATGCCGTCATCAATAGTGGTCCCCGTGAAGATGCAACTAGAATTGGTTCTGCTGGAGTGGTGAGGAGACAGGCCGTTGATATCTCACCCCTTAGACGTGTTAATCAGGCCATCTATCTTCTAACAACAGGTGCTCGGGAAGCTGCTTTCAGAAACATCAAGACAATTGCTGAATGCTTGGCTGATGAACTTATTAATGCAGCTAAAGGTTCATCCAACAGTTATGCTATCAAGAAAAAGGATGAAATTGAGAGAGTTGCCAAGGCTAATCGTTAAACCAACAAAGGATACAGTATTGGTGACCAGAAAGATTTTGTTTCGACCTTTGAACT…
Gma.17859.1.S1_at	CD395921	At3g02560	4e-88	Protein Synthesis			GAAGGATGTTGTCTTGATTGCCACAAGGAGGATCGTGCGACCGCCAAAGAAAGGCTCTGCTGTTCAGCGACCCCGAACCCGCACTTTGACCGCTGTCCATGATGCCATGCTGGAGGATGTTGTGTATCCTGCAGAGATTGTTGGCAAACGGGCCAGATATAGAATTGATGGCTCAAAAATAATGAAGGTTTTCTTGGACCCCAAGGAGCGCAACAACACTGAGTACAAGCTGGAGACCTTTTCTGGAGTTTACAGGAAGCTTACTGGAAAAGATGTAGTATTTGAGTATCCAATCTCAGAAGCCTGAGATGCTGCTGCTTGGTTTAATGGAGTATTGTTTTTTTGGCAGATTTTTCTGTTAGAATTACATATTTATGTTAAACAATAACCAAAATTTTG…
Gma.11157.1.S1_s_at	AI856076	At5g39850	3e-92	Protein Synthesis			ATCTTCGAGGGAGAGGCGCTGCTCCGAAGGATGTTCCGTTACGGTCTCCTCGATGAGACACAGAACAAGCTTGATTACGTCCTCGCCCTCACCGTCGAGAACTTTCTCGAGCGCCGCCTCCAGACCCTTGTTTTCAAGTCCGGCATGGCCAAGTCCATCCACCATGCTAGGGTTCTTATCAAGCAGAG
Gma.6450.1.S1_at	CD401012	At1g18070	3e-56	Protein Synthesis			GAGGTTCACTCTTCGCACTGAAGGAAAAACTGTTGCTGTGGGAAAAGTCACTGGTCTGTGAATTTGTAACAATTTTGACTTGAGGACGGGAATTCCTGCNCAAATNTANTGGAGTGGCAGCTNNGAGGCATAATTGACAGCATCAAGTTTACCATATATTCATTTCGGTATTTATTTTGCTTTTACTTGGGGTAGTATTCAGTGAAGAGTTATTTGTTGCCGCTGGTGTCCATGATGTACTTGTATACGGCCTTACAAGGCNTGGNTGCTTCAGTATTTTGCGGTTGGCTGCTTCCAACCGTGCTACTCNTGAGATATAATTTGAAAATNGATGGTTTTAAATCAATCTGCCTTATTAGCTGTGGAATCTGATGACTATTTTAGCCCAACAGCGG
Gma.17980.1.S1_at	BM526726	At5g60390	5e-78	Protein Synthesis			AAATGGTTATGCTCCTGTGCTTGACTGCCACACTTCTCACATTGCCGTCAAGTTTGCCGAACTTGTGACCAAGATTGACAGGCGATCTGGTAAGGAGATTGAGAAGGAGCCCAAATTCTTGAAAAATGGAGATGCAGGTTATGTTAAGATGATTCCCACCAAGCCTATGGTGGNCGAAACTTTCTCCGAGTATCCTCCTCTTGGTCGTTTTGCCGTGAGGGACATGCGACAAACTGTGGCTGTTGGAGTCATCAAGAGTGTGGAGAAGAAGGACCCAACTGGAGCCAAGGTCACCAAGGCTGCACAGAAGAAGAAGTGAATACATTTTTGTGTTTCTTCAAGTACATGCGATCATAGTTACATTTATAGTTACANNNNNCNNTNGNNNCNNANNANTNN…
GmaAffx.92783.1.S1_s_at	CF806186	At5g60390	1e-108	Protein Synthesis			TGGACGGGTTGAAACCGGTGTCTTGAAACCTGNAATGGTGGTTACCTTTGCACCAACTGGACTAACAACTGAAGTTAAGTCTGTGGAGATGCACCATGAAACTCTCACTGAGGCCCATCCTGGTGACAATGTGGGATTCAATGTTAAGAATGTTGCTGTCAAGGATCTCAAGCGTGGTTTTGTTGCGTCTAACTCTAAGGATGACCCTGCCAAGGAGGCTGCTAACTTCACATCCCAAGTTATCATCATGAACCACCCTGGACAGATTGGAAATGGCTATGCACCTGTTCTTGATTGCCACACC
Gma.11231.1.S1_at	CD400835	At1g57720	6e-78	Protein Synthesis			GGTTGTGGCTCTTCCGCGGCCAAGAGATTCCACAATTTGTGATTGATGAATGCTATGATATGGAGCTCTATGACTGGACCAAGGTTGATATCTCTGATGAAACTCAGAAAGAGCGCGTCAATCAGATGATCGAGGATTATGAACCATTTGAGGGAGAACCTCTTTTGGATGCTAAGTGCTTCAAGTGAGAAACAAAATTTTAGTCCCTAGTCAAAATGCTGATTTTTGTCGTGTGTCTTTTTCTTATGTCTTTGGTTTCTATCCTATTTCTGTTATAGCTGTTTTGGTTGGGATCTTCAACACTGAAACTTAATGCTTGATTTTGTTACACATTATCTTTTATGACTATAGCANGACCAGTATACAAATTTATTTANNNNNNNANNNNNNNATGAATTT…
GmaAffx.93348.1.S1_x_at	CF809073	At1g56070	6e-81	Protein Synthesis			CAGCAAGTAGTGCATTACTGGAAATGATGATATTTCATCTACCCTCTCCATCAACAGCCCAGAAGTATCGTGTGGAGAATTTGTATGAGGGTCCCCTTGATGATCAATATGCTTCGGCTATCAGAAACTGTGATCCTGAGGGTCCTCTGATGCTCTATGTCTCAAAGATGATTCCAGCATCTGACAAGGGCAGATTTTTTGCTTTTGGTCGTGTATTCTCTGGCAGAGTTTCAACTGGTTTGAAGGTGAGGATTATGGGACCAAATTATGTCCCTGGGGAGAAGAAGGATTTGTATGTTAAAAGTGTTCAAAGAACTGTCATTTGGATGGGAAAAAGACAGGAAACTGCGGAAGATGTCCCCTGTGGT
GmaAffx.84576.1.S1_s_at	AW185105	At4g26310	0.0002	Protein Synthesis			TCTCCAATTCAAAGCCTCTCTTCAGAATCTCTTCCAACCTCGTCGCTCACGCATCCTCCGCCACAACCTCTCCGCCGCCACCTTCGCCGCCAGTCCCCTCTCCATCCGCCCTCAACAGCCTCCTCACCGCTCCGTGGTCCGCCACTCAGTCACGCGGAATCACGCTCTCTGGATCTGATGTTCGAGTCGGGAATCTCATTGGAAACCGAGGACGCGCTCACGAGGTTCTCAAACTGTATCGCCCTCTTGAAGGAACGGGCAAAGCCA
Gma.18085.1.S1_at	BI971003	At3g26618	0	Protein Synthesis			TTTGTTTTGGATGATTGCGTCCTCCAAGCATGATTTGGATACTATTGATTATGGTTCTAAGACTTAGACTTTGCCCTTTGGTTTTTGATCCATAAGATGTGTAGCATTCACTTTTTTCCTTTCCTCTGCTTCATACATTTTGCTATTTTGTTACTCAATGTATGCTTATGGCAACTCTGCCAGATTATGCGCTGATTCTTCAAGAAATAGCACTCAGGAAGTCATGAT
Gma.5683.1.S1_at	CD410890	At2g04520	1e-45	Protein Synthesis			GGGAACGGCCGCTGCGAGGCGATGTGCATCGACGGCACCAAGCGCCTCTGCCACATCCGCGGCAAGATGCACAAGAAGGTCTGGATCGCCGCCGGCGACATCATCCTCGTCGGCCTCCGCGACTACCAGGACGACAAGGCCGACGTCATCCTCAAGTACATGCCCGACGAGGCCAGGCTCCTCAAGGCCTACGGCGAGCTTCCTGACAGCACCAGGCTCAACGAGGGCATCGGCGCTGGCCTTGATGAGGAGGAGGATGGGGCCGGAAATGATTATATCGAGTTCGAGGATGAGGATATTGATAAGATTTGAAGGAAGAGAAAAAAAAGTTAGGGTTTTGGTTTTGGTTTGTGTTGCTGATGCCTCTTTTTTTGTTTTTGTTTTTGTTTGAGATTATAT…
GmaAffx.58915.1.S1_at	BU763501	At2g05830	2e-93	Protein Synthesis			AGGAACTCTTATTGCCGATTCTGCTGCAGCTGCATTAATGAAGGCAGGACATGTGGATGCTGTTGTTGTTGGGGCAGATCGGGTTGCATCAAATGGTGACACAGCCAACAAAATTGGAACCTACAGCGTTGCCTTGTCCGCTAAGTTTCATAATGTACCTTTTTATGTGGCTGCACCCCTAACTTCCATTGATCTATCACTTTCTTCTGGACAAGAAATTGTCATTGAGGAGAGGTCTCCCAAGGAATTGCTGAACACACATGGAGGACTTGGAGAGCAGATTGCTGCCTCAGGAATTTCTGTGTGGAACCCAGCTTTTGATGTTACTCCTGCTAATCTAATATCGGGGATCATCACTGAGAAGGGTGTCATTACGAAGACATCTGCTGGTGATGCATT…
Gma.16127.1.S1_at	BE473742	At1g10840	1e-155	Protein Synthesis			GGATGACTTGTCACTAGAACAACAAAAGTTCCAATTCTANTATCGNAGCNTGTCTCGTCAACAAGCTCAGCAGCAAGCATGGCTTCAAAAGAGAAGGNCGGAGAACATGGCTCGTAAAGCTGCTGGAGAAGAACCTTTGCCNGAGGAAGATCCTTCAAATCCNATTTTCAAGCCGCTCCCAGAGCCNTCNCGGTTGGAGAGCTTCCTCATAACAAATCAAATTTCCAACTACTGCAACCAAATCAATGGGGTGTCAGGGCAGAGCTTTAACAGACTCTATTTGATGAAGGCTTTGCATGAGGATTGANAANGCNATTTTTGTTNGTCATTNTGATNGTTTGANCCAATTTCTTTTCCNTATAGGATGAGAATTTTATGGCGAATTTGGTAGTATANNNT…
Gma.17703.1.A1_at	CA819637	At5g27640	9e-10	Protein Synthesis			AGCAGATCCACGTAGAAGAGAGTTTACAGAGGCATAAGCTCAGGGATGGAGAGGCTAGCGATGAAGAGGAGGAATACGAGGCAAAGGACATCGAGGTGGAGGAAGTGATCGATGTAACAAAAGAGGTCCTTCACCTTGAGTATGGTCAAGAGTGAGTTTTTTAGCTGGGAGGACTTGGATTCGAACATTTTATTCACTTGTCGAGGTATAGTTGTTGGGCAGCTTACTTCGATTTCATCTTTGTAAAACCCAATTTTGTAATCTTTCATTAGTTTTGTTTTTTTCTTATTGTCAAATTTAACGTGAAAGACATTTTTGCTGCCTCCTTGGGCGGGAAGTGTTCACTCATATTCCTCGCTTCCTTCGCACTAACAACATGCCTGAAGA
Gma.6308.1.S1_at	BG359665	At3g13920	1e-150	Protein Synthesis			AGGGTGTTGCTATCAATTTTGTGACTGGGGATGATGAAAGGATGCTGTTTGACATCCAAAAGTTTTATAATGTGCAGATTGAGGAGCTGCCAGCCAATGTAGCCGATCTCATTTGATTTGGTCTTCCCATCATTGGTATGCTTTTTGTTATGGAGGCCGCTGTCATTATTTTATTTTTCACGGCCCAGGGCCTTTCTCTAGCAAGACTTGAACTTAACCCCAAACCGGTGATTTGAATTTGCCATTCTTCTCTCTAATTTTGGGTCTAGCAGAATGCGTTGTTGCAATTTTGTTGCTTGCTTGTTTGTTTGTCTTATTACTAAAGATTGTAGATTGCTGCTTTCTCTTT
GmaAffx.92104.1.S1_at	CF807829	At3g13920	3e-69	Protein Synthesis			TTATGTAATGTTTCTCACTCTAACCTGTCTCCCCC
Gma.16681.1.S1_at	AW306243	At1g54270	0	Protein Synthesis			TGACATGGACCAAAACACACGTGATATTATCATGCGTGAATTCCGGTCCGGCTCTTCNCGAGTTCTCATTACCACNGACCTTCTNGCCCGTGGNATCGATGTGCAGCANGTGTCTCTGGTCATAAANTATGATCTGCCAACCCAACCTGAAAACTATCTCCACCGCATAGGNCGTAGTGGTCGNTTTGGAAGAAAAGGAGTTNCTATAAACTTTGTCACGACNGATGATNCCAGNATGCTGTCTGATATTCAGAAGTTCTACAATGTGACTGTAGAGGAGCTGCCATCAAATGTTGCTGATTTACTCTGATGAGTTAATGTTTGTTCTCTGTTAAGTCATCAGGTTCTTATTCTATTTGGCAAGTATTATTTNTNCTNATTTTNTCTCTATATATTTTA…
Gma.6129.2.S1_s_at	AW186006	At1g13950	5e-72	Protein Synthesis			CACTGGGAAAAAGCTTGAGGATATTGTCCCATCTTCCCATAACTGTGATGTTCCCCATGTTAATCGCATTGACTACCAGCTCATTGACATCTCAGAGGATGGATTTGTGAGTCTGCTGACTGAGACTGGTGGTACTAAGGATGACCTTAGGCTTCCAACCGATGAAAATCTGCTTTCGCAG
Gma.4288.1.S1_at	BE659478	At1g11480	9e-16	Protein Synthesis			CACGGTACAGTAGAGCAGCTTCGGCGGTTGAACTTGCACAAGCATTCTCCAGATCTGTATCAGATCCAAAAGTGAATGATAGGTTTTCAGGTCAAAGGGGTCTGAACACNNNCNANAGCAGCAGGACACAAGTTCCATTTTCACGGCTTNTTGGTCCTACATCAAGGCCTCAGATCAATGGTTATTAAAATATTTGGTGGATAATTGGACTCACTCAAGACCAATTTCTATGAGATAGCATTGGATTCATGCAATGTGGAATTGCAGAGCACTTCATGTAGTGGCTGTGGTTTTAGTTATTTTCTCCNCATTCACAACAATTGAGTGAGAAATTAATGATTTCTCAAGTTACATAGCCTTGGTTGTGACAATACCTTCTTACAATTACCATGCTTTATT…
Gma.6914.1.A1_at	BG155750	At1g07910	1e-22	Protein Synthesis			AGAATTCGTGGCCTCATATTACCTTGTGGACTGCCGAAGGTGTTGCAGCCAAGGATGCCAACATGTTACCACAGTTGCTTGCAGAGGGGAAAGCAAATCGGATTGACTTCAATCCTCCCATCAATATATCTGGCACACTCGACTTTTATTGAGTTGAATTCCTTTTGCTACTCATCTTTCTAAAATAAAACCAACTGAAATTAAGGTGGTCATGTGCTTTTATTTGTTCAACAAAATCATACCCTTTGCTGGCATACAAGTTGGATCCGATATTTAGTGAAGATAGATGATGGAGAAAAATTTTGTAGGAGCGAGCATTTTCTCCTGAAGAACTGTGTACATATATATATAGGCTTTTTAGAAAGCCNGAGTATGGTTTCTGGAGTCTCATTGCCGAAT…
Gma.9931.1.S1_at	CD391412	At3g06440	1e-84	Protein Synthesis	Protein Modification		ATGGGCACATGGTCCTGGCTATGTTATCTCACGAGACATAGCAAAATTTATTGTCCATGCCCACCAAGAAAGAAAACTCAAGCTCTTTAAATTAGAAGATGTTGCCATGGGCATATGGATTGAACAGTTCAAGAATGATGGTAAAGAAGTACATTATGAAAATGATGAGAGGTTTTACAACGCTGGATGTGAATCAAATTATGTAATTGCCCATTATCAAAGTCCGAGGATGGTGCTATGCCTTTGGGAGAAATTACAGAAAGAACACCAGCCAGTGTGCTGTGAGTAAGTCATCTATGTTTTTGAGTTGTAACTGTTGATTCTGAGGTTTGAGCAATTNTAAATGTTAAGGTAAAATGTAAGTTACCACTAATCATCTTACACGTATTTTGTATCCTA…
Gma.17829.1.S1_at	CD400127	At5g23535	1e-67	Protein Synthesis			TAAGCGTGTCATTCGCTCTCAGAATCGTGTCATTGTTGAGGGTAAAAATCTGGTGAAAAAGCACATCAAGCAAGGGCAAGGTCATGAAGGGGGCATCTTTACAGTTGAAGCTCCAATCCATGCCTCCAATGTGCAAGTTCTTGACCCAGTGACAGGGAAGCCTTGCAAGATTGGACACAAATATCTTGAAGATGGTACTAAAGTCAGAGTATCAAGAGGAATAGGATCATCTGGGTCCATAATCCCTCGGCCTGAGATCTTAATGATAAGAACTACCCCACGACCTACTGTCCTTGGTCCCAAAGATACTCCAATGGATCTTGTCTTGGAGAAGACTTACGATGCTAAAACAGGAAGGGGCATGCCTGAGCTTTAAGGAGATTAGGTACCTTATTCAAG…
GmaAffx.92260.1.S1_s_at	CF807985	At3g11710	3e-53	Protein Synthesis			ACAACTCAAGGATCGACAATCAGGTGATGATGAAGCAATGGCCTTCGATGAAACATTTTGTACGGCTCTAGAGTATGGTTTG
Gma.5843.2.S1_x_at	BE824014	At3g12390	5e-67	Protein Synthesis			TTCAAGAGTCCAACGTCTGACACGTACATTATATTTGGGGAAGCCAAGATTGAAGACTTGAGCTCACAGCTACAAACTCAGGCAGCAGAGCAATTCNNNNCNNNNAATTTGAGCAATGTTGGATCAAAGCCTGAATCTTCTGCTGTTGCTCAAGATGATGAGGAAGTGGATGAGGCTGGTGTAGATCCCAAGGACATAGAGTTGGTGATGACTCAAGCTGGCGTGTCAAGACCTAAAGCCGTTAAAGCTCTCAAGGCGGCCGGTGGTGACATTGTTGCTGCCATTATGGAGTTAACTAATTAATTGTCTGGTTTGTCTGAATTTTAGAATGTGTAGCTATTTTTCTTTGTTGATTGAAATTTTTGTTTTCCTTGAATTTGAAATACTGGTTTCAGTGGT…
GmaAffx.91206.1.S1_x_at	CF806931	At3g12390	7e-68	Protein Synthesis			ATGGTGAACCTGTTGTCGAGGATGATGATGATGAGGAAGAGGATGATGATGATGATGATGATGAGGATGATGACCATGCCGAAGGACTAGAAGGTGATGCATCTGGTAGGTCGAAGCAGACCAGAAGTGAAAAGAAGAGTCGCAAGGCAATGCTTAAACTTGGAATGAAACCTGTCACAGGTGTCAGCCGAGTGACAGTCAAGAAGAGCAAGAATATCCTGTTCGTTATCTCAAAACCAGATGTTTTCAAGAGTCCAACATCTGAAACTTACATTATATTTGGGGAAGCCAAGATTGAAGACTTGAGCTCACAGTTACAAACTCAGGCGGCAGAGCAATTCAAGGCTCCTAATTTGAGCAATGTTGGATTGAAGCCCGAATCTTCTGCTGTTGCTCAAG…
Gma.900.1.A1_at	BE822955	At5g43810	1e-38	Protein Synthesis			TACATATGCCAGGTGTACACGCTCAGTATCAGTTGTTCCTCCAGCATATTATGCACATTTAGCAGCGTTTCGAGCACGTTTCTATATGGAACCAGATATGCAAGACAATGGCTCTGCAGGTGACGGTAATGGTCATGGTGCCAAAGCAACACGAGCAGCTGGTGATTATAGTGTCAAGCCNNNNNCAGACTTGAAAGAAAATGTGAAGAGAGTCATGTTTTACTGTTAGACTGCTTAGTGGCTTGGCCTTGGTAGAATGATAGATATATGGGGCAAGCATCAACATGATAAGCAAGTTTTCAAATCATGGAGTGCAATGTTCACCTCACATTACTTTGTACATTAGTCGTGTAGGTTTTGCTGTGGTAGATCCATGATTACAGTTCTTGAGCCATAGTT…
Gma.13510.1.A1_at	BG157753	At1g76400	2e-09	Protein Synthesis	Protein Modification		AATATGGCTCTCATTTTGACCTTGTTTTATAGTTGCAAAGAGATTAGCGATACTTCTGACGGTTGGAATTTTGGTGCAGTCTATTATTGTCTAGACTAAGGATCTCATCTTAACTATCGCTAATTTTATATCCATGCTTATCTATACCTATGTGAAAAAATGGATTGCATGCACTCCTAAATGGTCGTTAATACCCTTGAACCCTTTGGTTCAAGTTATGACTCGAATCTTGTGTTTCACA
Gma.1226.1.S1_at	CD393432	At1g32990	6e-68	Protein Synthesis			CTGCTTCGGTTCTACTTCTTAAAGCCGCTGGGGTGGAAAAGGGTTCAAAAGACCCCAAGGCGGAAATGGTAGGAAAGGTCACGATTGATCAATTGCGTACAATTGCTGCTGAAAAGCTACCGGACTTGAATTGCTCGAGTATCGAATCAGCTATGAGAATTATAGCGGGCACTGCGGCAAACATGGGGATTGTGGTTGATCCTCCTGTTCTTGAACCCAAACAGAAGGAATTTGTGTAGAGAAATTTCAGTTTGGCCGAGTGTAAAATCGCGCAGGACATATTTACTGA
Gma.2784.1.S1_at	AW310361	At3g01790	1e-63	Protein Synthesis			ACTGAAGTCATTCGCAAAGCTGTTCTGCGTATGCTNCCTAGAAACAAACTACGTGATGACAGGGATCGAAAATTAAGGATCTTTCCTGGCAGTGAGCACCCNTTTGTTGATCGCCCACTTGAACCGTATGTGATGCCTCCTAGAAGCGTACGGGAAATGAGGCCGCGAGCAAGGCGTGCCATGATTCGAGCACAGAAGAAGGCAGAGCAGCAACAACAGAAGGCTGATGGAATGAAGGGCAAAAATGGTGAAGCACAGGAAGAAAGTGCATGAAGACGCAATTTTGCTCAAAAGATGGCACTGATCATTGGTTATCATTGAAATGGAAAGCCATCTGTCTCTGTTAGCAATCCTACAATGCCCTATTGAATTGTGTTTGAATTTTCTTTTTTTATAAGT…
Gma.13142.2.S1_a_at	BF069870	At5g15220	1e-43	Protein Synthesis			TGAATTTTGCAGCATCATTGTGCAGAAGATTGAATATCAAGGAACTTGCGACAAATGTTCCTGTGTATAAAAGCACCAGTGATGTTTCTGGAGAAGGTTTGAGTTTCACGTTCAGGCGTTGGGCTTCCAAAAAGACTGCTGGTTCCACAAAGAATGGACGGGATTCAAAACCCAAGAACCTTGGAGTGAAGAAATTTGGTGGGGAGAGGGTGATACCTGNAAATATCATTGTTCGACAGCGTGGCACTCGTTTTCATCCAGGAAACTATGTTGGACTTGGGAAAGATCATTCTCTGTTTGCAT
Gma.14251.1.S1_at	CD418459	At5g56940	7e-55	Protein Synthesis			GAAGTTCTCGGTTACTACAATCCCTTACCAGGTCAAGATGGTGGCAAGAGAATGGGTCTCAACTTCGACAGAGTGAAGTATTGGCTTTCTGTTGGAGCTCAGCCTTCGGAGCCTGTGGAGCGGCTTCTATTCCGAGCTGGAATGCTGCCCCCACCTCCGATGGTGGCAATGGGGCGTAAAGGTGGACCACGTGATACTCGCCCAGTTGATGCTCTCACTGGACGTGTGCTAAATCAAGAAAAGGCAGCTAATGCCAATAACAATGAGCAGCAGCATGACACTCCTGAAAACCCTTAAAGTGATGTATTTTAGGATTTTTTCCCCCTTTTTTCATGACCNTTTTGTTCNNAGATATATCTTTAATATCTATGTTCCCNATTGACTTTACAGANACNCANT…
Gma.16095.1.S1_at	CD410387	At3g27160	1e-35	Protein Synthesis			ACTTCTCAGAACCAGAAACCCTCCTCCTCACAGCCCCTAATTGCCCAATACAACCCTCCTCCTTCACCCTCTTGCGCTTCTTCTTCTGAGTTGTCCTCTGTTATATGCCCATCCATGGCGTACTCCAACACGCTCTTCTTCCGGTCGCCGTACAACGTGCAGGTGGTGGTGGCCGAGGACGAGTCCGAGGAGAAGCTCCTGGGCAGGTTCCGCAGAGAGGTGATCAAGGCCGGCATCGTTCAGGAGTGTAGGAGGAGACGGTATTTCGAGAACAAACATGAAGAGAAAAAACGCAAGTCGCGCGAGGCTGCCAGATGTAACCGCAAAAGGCGGCCCATGTCAAAAACTGTAGGACAGAAGAAGCAGGATGTCTCAGCAACCAAAAGAGAAGACGATGAG…
Gma.5851.3.S1_at	CD397657	At1g74970	3e-64	Protein Synthesis			GACGCTAAGGAATATCTTCAAGGAAATCCATTGTGGCTTCAATACATTAAGGTCCCCTTAATAACTTTGGGATATGAAAGTAATTATGATGTTTTTGTCAAAGCTGAGGGTGGTGGCCTGTCTGGTCAGGCTCAGGCAATCTCTCTTGGCATTGCTCGTGCCTTGCTGAAGGTGAGCGAAGATCATAGAGNACCTTTGAGACAGGAAGGACTTCTTACNAGAGATTCCAGAGTGGTTGAGAGGAAGAAAGTTGGTCTCAAGAAAGCTCGTAAAGCCCCTCAATATTCCAANCGTTGAGGTTGGGATGTTACATGTATGGTCTGTCTTTTCTTTCCTCCTGGTGTCTCTGGAAATGNGTTACATTTGGAACTATTGATTGTTTTCATTTGTAGTTGTAGG…
Gma.2547.2.S1_at	BG154569	At5g26830	1e-128	Protein Synthesis			GCGAGATCAGATCCACCAAGCAGGGTATCACGTTGATGCTGATACAACTGATAGGAAGATTCAGAAAAAGGTACGAGAAGCACAGTTAGCACAATACAACTTCATATTGGTTGTTGGAGAGGAGGAAGCTAATTCAGGACAGGTGAGTGTACGAGTTAGAGACTTGGCAGAACATAAGGTTATGAGTATTGAGAAACTACTTGAACATTTCAGAGACAAAACTGCAGCTTTCGAATGATACTTTGCTTGTGAAAACTGAAGAAAAATTTCAGCCCCAAATACCTTAGTTTTACACAGTTGTGTGCATGTCACAATTTTATTTTTATTTTCAACCTATCAATTTATCCTGATTTTATTTTATGATTTGAATGGTAACAATATTTTCTTTGTATCGTTTTT…
GmaAffx.93165.1.A1_s_at	CF808890	At5g26830	0.0005	Protein Synthesis			GGCTTTCTGGGCTAAAAATAATTAGTTTTTTCATTTCCCCCAGTAAGAATATTATACATCAGGGTGTATGCTGTTGCTCCTTGATTATTGATCATGTTATTTTGTTGTTCCAGGTGAGTGTACGA
Gma.6.1.A1_at	BE607938	AtCg00810	7e-32	Protein Synthesis			TAGAACTCATGCCTTATCGAGCCTGTGAAGCCATTCTCAAAATAGTGTTTTCGGCTGGAGCTAATGCTAGCAATAATCTGGGTTTAAGCAAAGGAAGTTTAGTTATCAGTAAAGCAGAGGTTAATGAAGGGAAAACAATGAAAAGGGTAAAACCTGTAGCTCGAGGGCGTGCCCATCCANATTAAAAAGCGCACTTGTCATATAACCATCACGGTAAAAGGCTTACCTAGTGAGTCCGTCGTGGAAGCAAAGCCTGCTTAATCCTATTTGAGACAAAATGTATGCCTTATTATGAGTTCCCTTCCCCCATTTCATTTCATGAAAATTTCTGCATTTCGACATTATGTAGTTCATTTTCTACATTGTGACTTGTAGAGGAGTAATGAACATGCTATTTGT…
GmaAffx.80255.2.S1_at	AW423814	AtCg00050	7e-21	Protein Synthesis			CAACTCGCTCTTTATTATTTTCAGTTACTAATCCTAGTTATTTGATTTATATACTTNTTTTATAGTAAATACATGAGATAGAATATTCAAAATGGAATATTTCTATTATTTTATTCTTCATCCAATGACTATACATTCATTATATTTTTGTGTAAATAGAGGAAAAACTCGATGGAAAAATGGTGGTTTAATTCTATGTTGTTTAATAGGAAGTTAGAATACAGGTGTGAATTAAGTAAATCAATGGATAGTCTTGGTCCTATTGAAAATACCAGTCTAAGGGAAGACCCTAAAATTTTAACCGATATAGAAAAAAAAATTCACAGGGATTTGGATTATTTAGAAATGGAAGGTTTTTTTTCTAGCGATCTGAATACTGTTTCTAAGAATGATGATGAT…
GmaAffx.5910.1.S1_at	BU547049	AtCg00650	9e-28	Protein Synthesis			CAAATCCTTTATAGTATTTCTTGTAATAAATGTGATTTTTGGAATAGGGATAAATAAACCATGGAAAAATCTAAGCGACTCTTTATGAAATCCAAGCGATCTTTTCGTAGGCGTNTGCCCCCGATCCAATCGGGGGACCGAATTGATTATAAAAACATGGGTTTAATTAGTCGATTTATTAGTGAACAAGGAAAAATATTATCCAGACGCGTAAATAGATTGACCTTAAAACAACAACGATTAATAACAATTGCTATAAAACAAGCTCGTATTTTATCTTTGTTACCTT
Gma.3731.1.S1_at	AW310005	At5g15750	2e-78	Protein Synthesis			GATGGACCCAAAGGATCCCTTTCGGGTTGATNTGACTGATAAGCTTTTGGAGAAACTCTACAACATGGGTGTGATTCCAACCAGGCAAAGCATCACACTNTGCGAACGNTTAACTGTGTCATCCTTCTGTAGGCGTAGGCTCTCAACTGTTTTGGTGNGACTAAAATTTGCTGAGCACTTGAAAGAAGCTGTCACGTACATTGAACAAGGGCATATACGAGTTGGTCCAGAGACAGTTACAGACCCAGCTTTCCTTGTAACTAGAAACATGGAAGACTTCGTTACATGGGTGGATTCATCCAAAATAAAGAGAAAGGTGCTTCAGTACAATGACAAATTGGATGACTATGATTTAATGAATTAAGTGGAAAGCTAAATGTCAGCTTATTGTGGTTTACTA
Gma.2127.1.S1_at	BM270196	At3g04600	2e-94	Protein Synthesis			TACCTTACTTTTTTCCTAGAAGATGATGATGAACTTGAACACATAAAGAAGGAATATGGAGAAGGGCGCATGCTAACTGGTGAGGTAAAGCAGCGGCTAATTCAAGTTTTGACTGAACTAGTGGAGAGGCATCGCAGAGCTCGGGCTTCTGTGACTGAAGAGATGGTGGATGCATTTATGGCTATCAGACCACTTCCCCACATGTTTGACTGAAATTATCCTACCTTCGTCTGCCCAAATATTGCTCGGAGATCACTGGATAACTGGATTTATTTTGTTTCTCAACATGAAAATGGGTTTTCTATGCAACGGTATTGCTATATATGTGTACCTTTTTTTTGCCACCACCTGATAATTCAAATGCCAAGAAACTTAGTTCGGCTGAAGTAAGACCTTAGT…
Gma.8278.1.A1_at	BQ299672	At4g11120	2e-22	Protein Synthesis			GAAGGCAGTGCTGGATAATCTATCCAAGGAGGTGGGTTCATCTGTGAGGGTTGTTGATTTTCTCAGAATGGAAGTTGGGGAAGGAATTGCAAGGCAAGAAACAGATACATCTGAGACTGTTGCTCAGGTTGCCTGAGTTTAAGGTGATTCTGTGTATTCAGGNNNNNAACCCTGAGAGCTCAGCTTTTGTTTTTAAGGCTTTTGCTCTCTAGCTGATATTTAAACATGTATGTTCAGTTATTCATCCGTGGAAGATGAGGTACAGGTTCAGTTGAAAATTTGGCTATGGAGTTCTAGCTGATCCCTGTTCGACTGTATTAGTTTGTTTTGGCGCACTCGCCTGATAGTTGAACCACATAGGCTTCACATTCAAA
Gma.820.1.A1_at	AW309649	At4g11160	1e-15	Protein Synthesis			GAACTGAGTGTGGAGTAGTAATCAATAATTGGTGTGATTTCCAGATTGGAGACGTTATTCAGTGCTTGGNNACAGGTNATAAGGAAGCCNAAGTTCATTAAGTCAGAGAGTGGTGCTGTTCGAATCGAGTGCTGATCAAGTTAGTTGATGATTCTTCAACGCACANTTTTTTATAACATTACACTGAGCCGACNAAATAACCTCGTATGGGTGGATTGTTAGAGTAAGTATATTTTGTTGCACTGAAAGAAAGTGTAATTAAATTTTGAGCACTATTTGAAACGCCTAGTAGTTATTTTTTGACNATGTGCNTTGCNAAGAACAATAGTCAGTGTATTAGAATTATAAGTTACACCCACCTTCAGTTTTATAAT
Gma.7535.1.S1_at	BQ613041	At3g29590	7e-31	Secondary Metabolism			GAACTGCGTCGTGGCTTTGTTGGCTTCGGCCAAGCGAGAAGAGCTNTNGGGGGAAGAAGCGTTTTTCAAAAGCGTTATAGGGATAAGCGAGGAGTTGAACGGGTTAGAGGGTGACGTGTTGAACGGCGCGGACAAATGGATTCCGAAGATTCAATCGGTGGTATCGGAGACTCCTAGGTTGTTCTCCGTCGCCGGGTCCCCGAGGTTTGAGGTTTACGGCATTGACTTTGGGTGGGGAAGGCCTGAGAAAGTGGATGTCACATCCGTTGATAAAACGGGTGCGTTTTCGCTCTCGGAGAGTAGGGATCATAGTGGAGGGATTCAAATTGGGTTGGCGTTGACCAAGAATCAAATGGAGGCGTTTTCTAGGGTTTTTGCTCAAGGACTTGA
Gma.887.1.A1_at	BE822061	At5g41040	2e-66	Secondary Metabolism			CAAATTCTGTGTGCCAAGCTGGTGAGCTAACAGAAAAGCCCTTCTCATTTGGTGTGAGGCTCATCCAAGATGCAATCAAGATGGTCACAGACAGTTACATGAGATCAGCTATTGATTACTTTGAGGTGACAAGAGCAAGGCCTTCTCTTGCTTGCACCCTTCTCATCACAACTTGGTCTAGGCTTTCCTTTCACACCACTGATTTTGGATGGGGTGACCCTGTTCTGTCAGGGCCAGTGTCACTGCCAGAGAAGGAAGTGATTCTGTTCCTCTCTCATGGACAAGAGAGGAGGAACATCAATGTGCTTCTTGGTTTGCCTGCTCCTGTCATGAAGATTTT
GmaAffx.93227.1.S1_s_at	CF806161	At5g42830	2e-24	Secondary Metabolism			GTTCTGAGTGGATATGCCAACAAAAATGATGGGAACGTGACAGCATACCAAGGATATGAAGGAGAGGGAAGCATAGATTTGGAAATTTGCCTTTCGCCTGATGCAGTGAGCGCGCTGGAATCAGATGAGGAGTTTATGGAAGCTGCTTCTGTGGCCAATTTCCTACACTAGATAGTGAAAGCTTTTTGAGAGGCTATGAGATTCATTAATTCACAAAGCGCTCTCTGCCACCGTTTCACTCACTCTGCTCTCTTCGACTCTTCTAAAGTGGATTATGGGAAAATCACATTTACTGGTTAGATGAGAGATCTGACAATAGAATTAGTTAGCACGCTGTACATTTTAAGCTTTGTGTGTAAGAGAGACTGGCCCAGCGTGTGTAGGAACATCATATGGTTA…
GmaAffx.93030.1.S1_s_at	CF808755	At3g03980	1e-69	Secondary Metabolism			TCGGCGCGCGACTCGTCGTCAACTACACCTCCAACTCGGCCCAAGCCGACTCAGTCGCGGCGCAGATCAACGCCGGTTCCGCCACCACGACACCGCGCGCCGTCGTGGTCCAAGCCGACGTGTCCGATCCGGCTCAGGTGAAGTCGCTCTTCGACTCGGCCGAGCGCGCCTTCGACTCGCCGATCCACATCCTTGTCAACTCGGCGGGCGTGATCGACGGCACGTATCCCTCCGTCGCCGACACCACCGTGGAGTCCTTCGACCGCACTTTCGCGGTGAACGCGCGTGGCGCCTTCGCGTGCGCCAGGGAGGCCGCGAACCGCCTCAAGCGCGGCGGCGGAGGGCGGATCATTCTACTGACGACATCGCAGGTGGTGGCGCTGAGGCCGGGGTACGGGG…
Gma.11260.1.S1_at	AI759626	At3g12290	1e-124	Secondary Metabolism			GTTTTATCCACACTTTTGTTTCTGTTTAGGTAGATGAATGTATTCTACAAAATCACAAGGATCGCTTTCGATGGATAAGTAGAACTGGTCCAATCGAAACTATGTATTTGCCCTTTCACTATCTCCGAAGAAACATTCTCGATGTGGGTACTGACCATATTTTAGATTGGATTTAGAGCATAGCTATTCCTTGGTGGTAAGAAACGCTTGTAGCCAGTGTAAGATCAGTTCTAATGT
Gma.11260.1.S1_x_at	AI759626	At3g12290	1e-124	Secondary Metabolism			TGGTTGGATTACTCCAGTTCCTGGTGGTGTAGGTCCAATGACAGTCACAATGTTGCTGAAGAATACTTTGGATGGAGCCAAGCGCTACATTGAACAAAATAATTGATCTTCCTTTAATTTGAATAAATAAAAGGTATGTACTATTAGTTTGAAATTCTTTGAGAATCGGTTTTATCCACACTTTTGTTTCTGTTTAGGTAGATGAATGTATTCTACAAAATCACAAGGATCGCTTTCGATGGATAAGTAGAACTGGTCCAATCGAAACTATGTATTTGCCCTTTCACTATCTCCGAAGAAACATTCTCGATGTGGGTACTGACCATATTTTAGATTGGATTTAGAGCATAGCTATTCCTTGGTGGTAAGAAACGCTTGTAGCCAGTGTAAGATCAGTTC…
Gma.16225.1.S1_at	AW156699	At4g00620	3e-19	Secondary Metabolism			GCCATAAGAATTGCCTCTGCTGTTACACCAGTTCCTGGAGGAGTTGGTCCAATGACCATAGCAATGCTTCTCCAAAATACACTCATTTCTGCAAAGAGGGTGCACCATTTTGAATAACACTGTGAAAGGATGTATACTATTATGAGCCATCAATTTTTGTTTTGGGGAGTCTTGGATTTTAAGGTAGCATTTTTTCAACATTCGGGGGAGGGGGTGTTTGAGTTTCTTCCTCAAGCCAAAATAAGAAGAGAAAATGTTCCTTTGGATGATAATATAAAACATCTTCCATANANNNANGGCTACGAAATATAAACTGAGTGGGACGACATACAGCAATNNNNGNNNNNNNCNNNNNNCATACATTAGAGACTAAAGTGGATATGTCTGTGGGAGGCATTA…
Gma.6136.1.S1_at	BQ611704	At3g57030	1e-117	Secondary Metabolism			GAAACCGCTACTTGCAGGATCTTGCAGCTTTGGCTTGGTGGACCTAAGGCTGGCCAAGTGGATACATTTGCGGTTCTGCCTGGTTTCCCAGACAATATTAGAAGAAATTCAGAAGGGCATTTCTGGGTGGCTCTGCATGCAAAGAGAAGCCCTTTCGCGAAGTGGGTTTCTTCCAATCCTTGGGTGGGAAAGGCATTGCTTAAGATTGGATTNNNNNTNNNGNANNNGNNNNNANNATTTGCAGGGTGGAAGCCTCATGCTGCTGCTGTAAAGCTGAGTGATAAAGGAGAGATATTAGAAGTCTTGGAAGATTGTGATGGGAAGACCTTGAAGTTCATCAGTGAAGTGGAAGAGAAAGATGGGAAGCTTTGGATTGCATCAGTGTTGATGCCTTTCATT…
GmaAffx.75675.1.A1_at	AW351172	At2g37040	5e-26	Secondary Metabolism			AGAGATAGGGTTGCTCACCGGAGAAAAGAATCTCTCACCCGATGAGGAATTTGAAAAAGTATATACAGCCATGTGTCAAGCAAAGATTGTTGACCCAATTCTGGAATGTCTTGGAGATTGGAAAGGGTCTCCCATCCCAATATAATTAATGTGTAGGAGTAATCTGCCGATGTTTGACAATAACTAGCAGGCAACTTCTTTTTTCATGATG
Gma.3957.1.S1_at	BU547447	At4g24520	1e-160	Secondary Metabolism			AGCTGTGGAGTTTGATTTCTCAAGGAGGTTATCTTTACGTCTGTGGTGATGCCAAGGGTATGGCCAGAGATGTTCATCGAACTCTTCATACCATTGTCCAGCAGCAGGAAAATGTGGACTCGACAAAGGCTGAGGCTATAGTGAAAAAACTTCAGATGGATGGACGTTACCTAAGGGATGTGTGGTGATTTTTCTGATCATTCTTCTGCCCAGATTGTGGTATCCTTGCTATTTGATATGCTAAATTCAGGATTGGCTGAAGGATATTCTTGAGATTAGTCACTGCCTTTCCGGAAATTTAG
Gma.11049.1.A1_at	BI970250	At4g08790	1e-06	Secondary Metabolism	Nitrogen Metabolism		TTAGCTGTTATGAGTTTGTTATGCATTAAAATTTCTGTTTTATACCACCATACAAATTAATCTATTCTTTTTGGTTCAGGCAATGTATTGTTTGCTGTAGTTTTNNTATTGCTATTTTTCTTTTGATTAAAACCACAATTTACTGAATTCCATGGTTGGTTTTATTTGTCTTTTTCAGATCGTTTGTCTACAGGCATTGTAGTAGCTGATATTGATTTATCATTTGTTGATTCAGTTAGGGAGAAAATGCCAATTGCTAAGCAAAGGAAACNNANNNGCTTNTGGAAANNTGCATCTCTATAGGTNTTAATTGGACNAGTCAANAAGCGGTAGCTTATTTAAATATGGGATTTCTTTGTACCAAAAGAAAAATGAGACTTCCATATTAGATTCCCTTTA…
GmaAffx.37574.1.S1_s_at	BQ298504	At4g35150	8e-17	Secondary Metabolism			TTTACATAATTGGACCGACGAAAATTGCATAAAGATCCTGCAAAAGTGTAGAGATTCTATTTCAAGCAAAGGCAACAGTGGAAAAGTGATTATCATAGATGCCGTAATAAATGAGAAGCTAGATGACCCGGATATGACACAAACAAAGCTTAGTTTGGACATTATTATGTTGACGATGAATGGAAGAGAGAGAACGGAAAAAGAATGGAAACAACTCTTCATCGAAGCAGGATTCAAACACTACAAA
GmaAffx.6605.1.A1_at	CD410677	At1g17020	3e-56	Secondary Metabolism			CTCACACCCCATTCAGATGGAGTTGGTCTCACTATCCTCTTACAAGCCACTGAAGTAGAAGGGCTCCAGATAACAAAAGATGGCATGTGGGTTCCTATCAAACCCTTGCCTAATGCTTTCATTATAAACATTGGGGACATGCTCGAGATTATAAGTAATGGAATATACCGAAGTGTTGAGCATCGTGCAATGGTGAACTCTGCAAAAGAAAGGATTTCAATTGCAACATTCCNCACNNNNAAACATGATGGGGTGATAGGTCCTGCAATAAGCTTGATCACTGAAAAAACACCAGCACGGTTCAAAAGAATCGAATTAAAGGAGTTTTTGAAGAACCTATTTGCTCGTAAACTTGATGGAAAGTCTTACCTAGACACCTTGAGAATATAGCATAACTTA…
Gma.10827.3.S1_at	AW758966	At3g19000	1e-114	Secondary Metabolism			GAAACCCACCCCAGATGCTTATATCATCAACATTGGTGACACTGTTCAGGTTTGGAGCAATGATGCATATGAGAGTGTGGATCACAGAGTGGTGGTCAACTCTGAGAAGGAAAGGTTTTCCATTCCTTTCTTCTTCTTCCCTGCACACGACACCGAAGTTAAGCCTTTGGAGGAGCTGATAAATGAGCAAAACCCTTCAAAATATAGGCCATACAAGTGGGGCAAGTTTCTTGTCCACAGAGGGAACAGCAATTTTAAGAAGCAAAATGAGGAGAACATTCAAATTTATCATTACAAGATAGCTTAAAGGGTAAATTGTGTATGATATTATCATGATATGAGGCAGCGTTGATCCAAGACAACGTTACTGATATGAATAAGTCCGATCAACTTCACTGC…
GmaAffx.5524.1.S1_at	AW349732	At5g05600	3e-23	Secondary Metabolism			AAAAGTGACATACCCATTGAACCAGTAAAGGAATTGGTAAAGCCAGACAAACCTGCACTCTACACGCCCATGACCTTTGATGAATACAGGCTCTTCATTAGATTGAGAGGACCATGCGGAAAATCTCATGTGGAATCGTTAAAATCTCCAAGATGATCGATATATCGTTATCAACAAGGACATTGCTTGCAATATTATATAATTAATAGTATTGTAAATCCTGTTCCTAGATATGTACTTGTCTGAACAAATTGCCTAATAGTTAAACCACAAAAGCAATTGGATAATATAGATATGAAATTGATGTGGAAAAACTGTTTATGTTAATGGATGAATTTGGGAGGTCCGCAAAGATCATTCCTATAGCTTTGTAATTATTAGAGATTTGTGTCCCCACAT…
Gma.1326.1.S1_a_at	CD397515	At4g24780	9e-14	Secondary Metabolism			GCATCGGGGGCTGGAGCCTCCTCTAGCTATGCAAGAGCATCTAGCTTGAGTGCAAGGCCATCTTCATTGGTGGGGTCCATAACCACTGGTGCGGGTGCACTCAGCTGTAGGAAGGGTTCCCGCTGCTGATTATGACCCC
Gma.6986.2.S1_at	BI972259	At1g76150	1e-120	Secondary Metabolism			GAAAGCGGACAGTCCTTTCTGGCTACGTCGATCTGCGTGGTTTGACTTCGTCACTGTGAAAGAATTCAAATTCATTTACATGTAGGCTGTAGGTCGATAATATTTGCAGAGGAGATAATTTTAAAACGTAATTAAGTGCGATATCGATGATTAAATTTTA
Gma.6986.2.S1_s_at	BI972259	At1g76150	1e-120	Secondary Metabolism			GAATCCAGCTGTGAAAATTCCTGAAAGTAAACCTTTTTCNGTGTTTGAGGATCGAACCCAACCATCTCAGGCATTGCTCTATAGGCTATCTGGTGATTACAATCCTCTGCATTCAGATCCCATGGTTGCAAAGGTTGCCGGATTCTCGCGGCCAATATTGCATGGTCTGTGCACATTAGGATTTGCAGTTAGGGCAATCATCAAATGCATATGCAGAGGAGATCCAGACTTGNTAAAAAGCATAGCGGGCAGATTTCTTCTACATGTCTACCCNGGTGAAACTCTNGTTACTGAGATGTGGCTTGAAGGCTCAAGGGTNATATNTCGGACTAAGGTGAAAGAGCGAAAGCGGACAGTCCTTTCTGGCTACGTCGATCTGCGTGGTTTGACTTCGTCACT…
Gma.6045.1.S1_at	BQ453599	At2g38080	0.009	Secondary Metabolism			ACCGGATCTGCCACAGTGTTAAGACCAAGAAAGCATCATTAGTCAAAAAAAGTTATTTAATTTCCTCAATTATTGGCTTGTTGTTCTAGTGTTTTACCAGGTCTTTAAATACTTGTAAAATAGACAGTATTTGTCCTGTATTTCAAGGTCCAGAATTGGACCATGCTCAATTGAGCAGCTATGTTTGTGTTTTTCTTGATTGAGTGCAAGGTGATAGTGCTTTTAGAACAAAAAATAGCATAACTTGTGATCTCTCGTCATTACTATTAAG
GmaAffx.90806.1.S1_at	CF806531	At4g39230	2e-74	Secondary Metabolism			AAAGGAGTTTATGTCACGGAGGAAGATGTTGGGACTTATACCATAAAAGCAGTGGAAGACCCAAGAACCTTGAACAAAACTCTGCACCAGAAACCCCCTGCCAATGTTTTGACCTTCAACGAACTCGTGTCCTTGTGGGAGAACAAGATTAAGACCACCCTCCACAAAATCTACGTTCCAGAAGAGCAAATTCTTAAGAAAATCCAGGAGTCTTCTTTCCCTGCCAATTTCTTAATAGCATTAGGTCACGCAATGCTGGTTGAGGAAGCTTTTAACAATGAGGCTGACCCTTCTG
GmaAffx.90806.1.S1_s_at	CF806531	At4g39230	2e-74	Secondary Metabolism			AGGTTCCTCCCATCCGAATTTGGATTAGATGTGGATCATCACAATGCAGTTGAGCCAGCAGCAAGCTTTTTCAACAAAAAAGTGAAANNCANNAGGGCAATTGAAGCTGAAGGAATCCCTTACACTTACGTTTGCTCATATGCCTTTGCTGGTTACTTCTTGCCTACATTGGGACAAGAAAATGTCACAGCCCCTCCCCGTGATAAGGTTGTCATTCTAGGAAATGGAAACGTCAAAGGAGTTTATGTCACGGAGGAAGATGTTGGGACTTATACCATAAAAGCAGTGGAAGACCCAAGAACCTTGAACAAAACTCTGCACCAGAAACCCCCTGCCAATGTTTTGACCTTCAACGAACTCGTGTCCTTGTGGGAGAACAAGATTAAGACCACCCTCCAC…
Gma.428.1.S1_at	AF243378.1	At5g41210	9e-96	Secondary Metabolism			GAAGTTCATACAATCCTCTATAAGCTCAAAACGAGGCTTTCTGAGCAGCAATCTAATCAGGCAGATGGCGTGATGCAATCTAGGATTAGAACCCCTCTAAGTTCAAAGATGTGAACAAACAACCATGCCAGTAACGTGCCTGTGACAACTTATATNTGTGTGTGTGTGTGTGTTGGCTGCAAGTATCACTGTATCAGGTTTGAAACATCAAAGATGAAGTTTATGTCTGTATTGAGACCCCTTAATCTAAGTAAGTTGGGCAGGTAATAAATGTGATTTCCACATGAAGATACAATCGTCTCCTCCTATGAGCAGATTTGGCGGCAATAATGTTAGTCTGTCCTTTATATTTGCCACGCACAATATTTTCTAGGAGCTGGTAAATTGCTGTAGTATAGA…
Gma.5796.1.S1_at	CA818875	At1g50480	1e-150	Secondary Metabolism			GAGCCAGTGGTGTTGAGTACTCAGAACAGGCTGAGAAGCAGATTGAGATGTATAGCAAGCAAGGATTTTCAGGTCTTCCAATNTGCATGGCTAAGACTCAGTATTCTTTCTCAGACAATGCTGCAGCAAAGGGAGCTCCAAGTGGGTTTGTCTTNCCCATAAGGGATGTNAGAGCTAGTATAGGCGCTGGATTTATTTATCCTTTAGTTGGAACAATGAGTACGATGCCAGGGCTTCCNACAAGGCCATGCTTCTATGACATTGNNTCTNGATACAACAACTGNAAAAGTCATTGGTCTCTCTTAAATCAAAGTGACTTGNTCTATCACCTTTCAAAAGCTTTATGGATGTCATTTACATATCNNCCTTTGCGATGTTCATGAANNTCACAGTAACATT…
GmaAffx.56889.3.S1_at	AW185190	At3g59380	6e-68	Secondary Metabolism			GTGCTTTACACCATCGAAGCCATTATAGCCTACCCTGAAAATGAAAGCTCGTGGAGATATCTACGAGGACTTTATAAAGGTGAAACNACTTCATGGGTAAATGATCCNCAAGTTTCTTCAGTATGNTTAAAGATTTTGAGAACTAAGAGNAACTACGTGTTTGCTCTTAGCACTATTTTNGATCTTATATGCTTTGGTTATCNACCAAATGAAGACNTTAGAGATGCCATTGACGCCTTAAAGACCGCAGATATGGATAANCAANATTTAGATGATNATGAGAAAGGGGAACANCAAAATTTAAATATAGCNCNAAATATTTGTTCTNTCCNAAAACAAGTTGATCCAATTAGAACCAACTATTGGATTTGGCGCAAGAGCAGACTTCCTCTATCAGCT…
GmaAffx.92866.1.S1_at	CF808591	At1g30700	3e-63	Secondary Metabolism			TAAACTTGACAAGAAAACTTCACAAGTTCATGACTCCTTTTGTCTCCAAGAACCCTAGAGAGGCTTTCTACAATTATAAGGACCTTGACTTGGGGATTAACCACAATGGTAAAAACAGCTACGCTGAAGGGAGAGTTTATGGAGTGGAGTATTTCAAGGATAACTTCGACAG
GmaAffx.32157.1.S1_at	BU547860	At5g44400	4e-47	Secondary Metabolism			AGTTCTCTACAAAATTCAGTATGTGACTGGATGGCTTGATGGAGAGAAGAGTATGGCAAAGCACATGAATTGGATGAGGAAATTTTATTTCTACATGGCTCCCTATGTTTCTAAGTATCCAAGAGAAACTTATGTGAATTATAGAGACTTGGATATAGGGATGAACCAGAAGAATAACACAAGTTTATTGAAGGCTTGGTCATGGGGCTACAGGTATTTCAAGGGTAACTTCAACAGGTTAGTGAAGGTGAAAACTAAAGTTGATCCATCNAATTTCTTTAGGCATGAGCAGAGTATCCCTNTATTGCCAACTNGTAAGAAAGNGTAGAAGGNAAGAANAGAAGAAGCTANNNCAAAGGGNTACANNNNGCATTGTATTATGGCTAGAATGCTAGATCA…
Gma.1677.1.S1_a_at	BE190184	At5g38900	2e-78	Secondary Metabolism			ATAAGTTTCTTCTGGAATCTGCTGCAAAGGTTGGTATAGAAGGAGCAGAAGAGTTTCTTAAGGACCCCAACAATGGTTTGAAG
Gma.1677.1.S1_x_at	BE190184	At5g38900	2e-78	Secondary Metabolism			TTGTCTGGACTCACGGGAAACACTATTGACAGCCACAGGCTTATATATTTTGCTAGGCAGCAGGGTCTTGACAAGCAACATGATCTAGTTGAAGAACTTAACATTGGCTNNNNNNCNNNGGGAAAATACATTGGTGACCATAAGTTTCTTCTGGAATCTGCTGCAAAGGTTGGTATAGAAGGAGCAGAAGAGTTTCTTAAGGACCCCAACAATGGTTTGAAGGAGGTTGAGGAGGAGCTCAAAACTTACTCANGAAACATTTCAGGNGTTCCATATTACGTGATTAATGGGAATCACAAGTTGAGTGGTGGACAACCCCCTGAAGTCTTCTTGAGAGCTTTTCAAGTTGCTACAAATTAGAATTTCACCTTCTCANATTTTCTGCTTCCCTCTATAAGA…
Gma.13010.1.A1_s_at	CD396246		5e-07	Secondary Metabolism			GGTTCAATCATGGACTACTCATGTGTAACATTTTTTTTTATCATTAAAAATTGAAAGACCAAAAAAACNAAACNAAAGGCATGATATTTACNATAATTCACGCATATGTCTTGATATTCTGATATATCCTAGTGTTGTAAAACTGCTTTGTGTTCTCAAGTGGGTTTAAACTATGATTACTTGGATTGTAGTTTGTATGTTAGTGGCA
Gma.2776.2.S1_a_at	BU577475	At1g05010	5e-32	Secondary Metabolism	Ethylene Biosynthesis		GAAGGGTCTTCGTCCCCACACTGATGCCGGTGGAATTA
Gma.3591.1.S1_a_at	BE440266	At1g05010	1e-112	Secondary Metabolism	Ethylene Biosynthesis		GAAGGAATTAGATGAGACAAGCCAAGTGTACCCGAAATTTGTGTTTGATGATTACATGAAGCTCTATGCTGGTCTCAAGTTTCAGGCTAAAGAGCCAAGGTTTGAAGCTATGAAGGCCAATGCAAGCGTGGTTGATGTGGGGGCCATAGCCACAGTTTGAGTCTCAGGCTCTCAGCATGTGGAAGCAACATGGGAACGGTTATGTGTGTTTTCTGTTAATAATAAACAAAGGCTACTCAGAACATATTAGTGTTTGGTGTCCTTGGATAATTGGCATGGAAGCT
GmaAffx.6142.1.S1_at	BU765938	At2g06050	1e-127	Secondary Metabolism	JA Biosynthesis		GGAAGCTGTAGCTGAAGGCCATGCTGANTTGGTATCCTATGGTCGNCTTTTCATCTCCAATCCAGACTTGGTTTTAAGGCTTAAGCTNAATGCACCTCTTACCAAGTATAACAGGAACACATTTTACACCCAAGATCCTGTTATAGGCTACACAGATTATCCTTTCTTTAATGGAACAACTGAGACAAAATTAAGTAACTAGCTAAGGCCATGCATGCCCTTTAATTTTAATCTCCATATGGCTTTTTGAATAATAATGTTCATAACATTCAAAACTCTTCAGTTGAGTTTATCCTCAGACAAACAAATTAAGTGGTTCATTCACTTGTTAGGGTATTTAGATCTTAGGTTAATTAGTCTCCGGCATTTTGATTTCATTTC
Gma.17202.1.S1_at	BI972481	At2g45300	2e-31	Secondary Metabolism			AAAACAGTGAGTATATGCATGGCTTGCTTTTGTTTCTTAACATTCCCTTGTAAGAACTTGAGATAATTTGTATTGTTGGAAAGAGCTATTGATTCTGTTGTATCAAAGTAATTTAATTTCCAGTACAGACTTGGCTCTATTCCTCATATGTGGTGGTGTACATTGCATCTNTGCATTTGATCCCATTTCTATTGGGATAGGACCATACCTTTTT
GmaAffx.90764.1.S1_s_at	CF805757	At2g45300	4e-69	Secondary Metabolism			GTCAATACCTAACTGCTTTGCTTATGGCAGCTCCTTTAGCTCTTGGCGATGTGGAAATTGAGATTGTTGATAAACTGATTTCTGTTCCATATGTTGAAATGACTCTGAAGTTGATGGAGCGTTTTGGAGTTTCTGTGGAACACAGTGGTAATTGGGATAAGTTCTTGGTCCATGGAGGTCAAAAGTACAAGTCTCCTGGCAATGCTTTTGTTGAAGGTGATGCTTCAAGTGCCAGTTACTTCCTAGCTGGTGCAGCAGTTACTGGTGGGACTATCACTGTTAATGGCTGTGGCACAAGCAGTTTACAGGGAGA
Gma.6523.1.S1_at	CD416204	At2g44050	3e-76	Secondary Metabolism			GGAGATACAACCCACTATGATGCAGTTGCTAATTCAGCAGCATCAGGAGTTCTTTCAGCCAGTCTAAACTCAGGTGTTCCATGCATATTTGGTGTCCTAACATGTGATGATATGGATCAGGCTCTAAATAGAGCTGGTGGAAAGTCTGGGAATAAGGGTGCTGAGGCTGCATTGACTGCTATTGAGATGGCATCTTTGTTCGAGCACCATCTGAAGTAGTCAGTGTTTTAACCAATCTCATAGAGCTTTTGTTGGAACGGCATGAATTCCCAATTTTCATCTCCAGACTGCTTTTGGTTGTAGTTCGAAA
GmaAffx.66301.1.S1_at	BG510223	At1g03400	9e-32	Secondary Metabolism	Ethylene Biosynthesis		GGCTCTTACGGTGTTGCTGCAGGACCATATTGGGGGGTTGCAGGTTGAGACTGAACAGGGTTGGATCCATGTCAAGCCTCAGCCTAACGCCTTGGTTATTAACATTGGAGATTTCCTTCAGATAATTTCTAATGAAACATACAAGAGTGCTCATCATCGGGTGTTAGCCAATTATTCTAACGAGCCACGAGTCTCTATTGCCGTTTTCCTCAACCCAAGTGATAGGGAGAAACATTTTGGACCATTACCAGAGCTAACATCAACAGAGAAACCAGCTCTTTATAGGAACTTCACGTTCCATGAATTTATGACAAGGTTCTTCACGAAAGAGTTGGACGGTAAATCATTGACAAATTTCTTCAGGCAGTGATGTACAC
GmaAffx.70005.1.S1_s_at	CA936335	At1g06620	2e-42	Secondary Metabolism			AATTGGAGAGATACATTTGGTTTTGNTGTTGCTCCTGATCCANCCAANCCTGAAGAAATANCATCTGTNTGNAGGGANATTGTGATTGAATATTCAAAGAAAATAAGGGATTTGGGTTTTACAATNTTTGAGTTNTTGTCNGANGCTTTGGGACTTAATCCTTCTTACCTTAAAGAATTNAANTGTGNTGANGGACTCTTTATTTTGGGTCACTACTATCCANCATGCCCTGAACCTGNATTAACTATGGGCACTACCAAGCACACAGATNGTNAACTTCNATGACTTTACTTNTACAAGACCAANTTGGTNGGTCTTCAAGTTNNNNNNNANNNNNAANNNNNNNNNGTNNAATGTTNCCTCCNTTACATGGAGCTCTTGTTGTAAACATAGGAGATC…
Gma.4295.1.S1_s_at	AF488307.1	At3g25570	1e-134	Secondary Metabolism			TATGCAAGCTTCGAAACTGTTGGTTATGACTTCAAAGCGGTGAATCTGAACGAAATGGTTCAGAGGGTATTGGCATGTTTCCTCCCAACTGAGTTTTCTGTTGCAGTTCATGTGGATGGTGCAAGCAAGTCGTTTGAGCAGACCTGCTTTCTGGATGTTAAGGGATACTGTCGTGAAGAGAGGAGCCACGAAGGGCTTGGAATGGGTGGTTCTGTTGTCTACCAAAAATTCGGGAAGACTAGTGACTGTGGTTCACCTAGATCAACTCTAAAGTGCTGGAATGAGGAAGATGAGGAAGAGTAGTTTCCTTAAGTGTCTTTATTATTCTGTCCTTGTGAAAATAAGTCTGGTTTTCCAGATACGTTATTGTTTTTCTTTGTTGTCTTTTTTAGCTTCTGT…
Gma.17605.1.S1_at	BI968208	At5g13930	0	Secondary Metabolism	Flavonoid Biosynthesis		CTTTTTTCATATGTATTCTTGGCTGGCCGGTTTGAAAAAACGTATTGTGTTTCGATTTTTTTTCCCCTGCCCTGCAAATGCTTCTGTTTGTATACT
GmaAffx.42116.1.S1_x_at	BQ081473	At5g13930	3e-23	Secondary Metabolism	Flavonoid Biosynthesis		TTGTACTCCGCAGTGTCACTGTCTAATCATATATATTGAGCAAGAACACAGATCCTTCTTTTCTTCTTATGTATTATTGCTTTTTTAGTTTGAAAAATGTATTCTTTCTCTTTTGCTTTCTCACATTCTTCTTTTTTGTATACCAGT
Gma.2826.1.S1_at	CD397710	At3g55120	3e-50	Secondary Metabolism	Flavonoid Biosynthesis		TGCAGTGATAGACAACAAGCCACTTTCGGAGNCAGTGCTGGAGACTATGATCGGAGAGATTCCTGTTTCCCCTGCTTTGAAAGAGAGTTTGGCTACAAGGTTTCATCAGTTCTTCAAAGAGTTAGAGGCCAATCCCAACATTGAAAACTGAGAGTTGC
Gma.2826.1.S1_s_at	CD397710	At3g55120	3e-50	Secondary Metabolism	Flavonoid Biosynthesis		TAGAAATGCTTTCAAGGATCAAAATTTCCCACCAGGCTCCACTGTTTTCTACAAACAATCACCCACTGGAACATTGGGGCTTAGTTTC
GmaAffx.92003.1.S1_at	CF807728	At3g55120	4e-42	Secondary Metabolism	Flavonoid Biosynthesis		AGTGGTGTACTACTTATTATGGCCACACCAGCATCCATCACTAATGTCACTGTGGAGTTCCTTCAATTCCCCGCACTGGTGACACCTCCTGGCTCTACC
GmaAffx.92003.1.S1_s_at	CF807728	At3g55120	4e-42	Secondary Metabolism	Flavonoid Biosynthesis		ATTATGGCCACACCAGCATCCATCACTAATGTCACTGTGGAGTTCCTTCAATTCCCCGCACTGGTGACACCTCCTGGCTCTACCAAATCCTATTTCCTTGGCGGCGCANGGGTGAGAGGGTTGAATATTCAAGAAGAATTTGTGAAGTTCACGGGAATAGGTGTTTATTTGGAAGACAAGGCCGTGTCATCACTCGCTGCCAAATGGAAGGGCAAGAGTGCAGCTGAATTGCTCGACTCCCTTGACTTCTACAGAGATATCATCAAAGGCCCCTTTGAGAAGTTAATTCGAGGGTCAAAGTTAAGAACATTGGATGGTCGTGAATACGT
GmaAffx.93245.1.S1_s_at	CF808970	At3g55120	8e-44	Secondary Metabolism	Flavonoid Biosynthesis		TTTTTCTGATCCCTTATCTTAATTAATTTAATCACCAATGGCTCGTTCTATCGCTAACGCCAAGACTTTCTCCGCTCTCGTGCTAGACGGATTCTCCAACACTCTCACCAGACGTGGCTACTCTCAAAGCGCAACAAGGGGNAGGAGTTGCCTCCATAGCACCCAAATCAGGGGAAGACAAAGGTGTCTCATCATACAAGGTTTCCTGGGTGCCAGATCCCGTCACCGGTTACTACAAACCGGAAAACATCAAGGANGGTTGATGTTGCCGATTTGCGTGCTACCCTTCTCCGCANAAAATTCAACAACTAATTTCAACAATTTTAATTTTTTACCAAACCTTGNGTGATTGATTCGTTATGGAATTAATTTTGATACTCATATGCTCTGCCCACCTTC…
Gma.1527.1.S1_a_at	BI968185	At5g58490	1e-124	Secondary Metabolism			GGCTCACTTCAAAGACATAGCATTGGCACATATTTTGGCACTTGAGAACAAGAAAGCAGCAGGAAGGCACTTGTGTGTGGAATCTATTCGTCACTTTAGTGATCTTGTGGACAAGGTTTCTGAGTTATACCCTGAATACGATGTGGTCAAGTTGCCAAAGGATACCCAGCCAGGGTTGTTGAGGGCAAGTACAAAGGATGCATCAACAAAGCTGATTGATTTAGGTCTAGAGTTCACTCCTGTAGACCAAATCATCAAGGATGCAGTGGAGAGTCTGAAGAGCAAGGGCTATGTCTGATTTCCATGCTGCTGCAGAGGGACTGAGTGCACTGTTACAAGTGGTG
Gma.5758.1.S1_at	AW317204	At5g57580	2e-75	Signal Transduction	Calcium Binding		ATCATTCATGCCATCTCCCAGTATACCNAACTATGATGAGGATCGCTCTCGCCCAGGCAGAGCTGTTGTGGGATGGCTGAAGATCAAGGCAGCAATGAGGTGGGGCTTCTTTATCAGGAAGATAGCNGCTGAGANGCGGGCNCAGATAGAGGAGTTAGATGAATANGTTGTNNGGACAATGGTTGCAGGCTTAACAGTTAGCCNTAAGATAATACTGATATTCTGCAGATTTAGTTGTCTTTATCAGTGCCAACCAAATTGTGCAGTCCATGGTGTTAATATTCTTGATNTATGNATCTNTGTATCTGATTTGACAGCANNNCGTTTGNCCCAGTATNCTGTACAGTTTGTTGAAGCTTAGGAAAAACNGTGATTGTCAATTTGTTTTTCNNTTTCACG…
Gma.555.1.S1_at	AW734193	At4g28540	9e-17	Signal Transduction	Protein Kinase		GATATCATCAGTTTTGGACCAAGGTGGACTTTTTTCTNCCCCCAGAATTNNNNNAGAAGGTTCCTCAGTCACTGTAACGTAAAGACGTGCCAAAGAGAATTCAACTGAAATTCTTTTAATATTTTAATTACTGTACTAGATGAGACCTAAGTTGTAGTAAGTTCCATGATACACACCATGTCCTTGTTTGTTAACAATGAGGTCCAACGCTGCCTGTATGTTACATATTAACGCTGCCCTTAAGAATGGAATT
Gma.6709.1.S1_at	BE823291	At5g58380	9e-76	Signal Transduction	Protein Kinase	AtCIPKs	GTTAGGCCTGCACTTAAGGACATTGTTTGGAACTGGCAAGGAGAACAACCACAACCATTGCAACATGGAGTGGTGCAGAAAGAGGAACAACCTTCTTATCCTGGCATATCAGAGGTTGTGCCACAANCAACTGCGTAATGAATCTTGTCCCTAGATTGGGTTTTGTATTGTAGTATATGCTTTATGTTCTTGGTCAAGTGCACACTGTCATGTTGATCGTTGTCGCGGAATAAGGTGGGTGGTTAAGCATGTATGGATTTACTTGCTCAGCTTGTTTAGTTAGTTTCTTATTTGACCATTTGGGTCTTCTGTTGTTATCTCTGTATTGAGTCTATCGACTATGTTAGAAATGGCATTAGCATTTTNTAAAATGGCATCAGAATCTGCTTGAGCATGTCT…
Gma.1980.1.A1_at	BM520466	At2g25090	1e-07	Signal Transduction	Protein Kinase	AtCIPKs	TGAGGCCCGCGCTGAAGGACATTGTTTGGACGTGGCAAGGGGATGCCACGTGTGCTGCTAACTTCCCCGCCTGTCACGGTGAGGAGTGTCAAAAGCAGGTTGTTGTTAGTACTATATAATTAGTTAATTAACTATTAATTATAATTAGTGTGAGGGTCCACTGAGAGGGTTCTAGAAACGGTAGCGTTCTAACNACTTTTCTTTTGCTTTGGGTTTTGTCGCTTTCGTCTTTATTCCCTGCCTGATTTTTGGAAAGATAGGGTTTTGCACCTTTTGAAGGTGAGGCTGTACATAAACTGTAATTAATATATTGTATTTTGCTGCCCTTACATTCGGAATGGA
Gma.1518.2.S1_a_at	BM524684	At3g10300	8e-30	Signal Transduction	Calcium Binding		CGTGCTTCCAGATGGCGGACCAGGACGGAAGCGGGTTCATCGACGACAAGGAAATGCAGAGAGCGCTTTCTTCGTATAACCAAAGCTTCAGTCTCAGAACCGTTCATCTTCTCATGTATCACTTCACCA
GmaAffx.78968.2.S1_at	BM188587	At3g29000	2e-13	Signal Transduction	Calcium-Binding		AAATTGGCTACCTTATTTCTGATGGGAAGGCATCTCAGAATGATGGTGAGGGCAGAGGAGCAGGTATCAAAACCAGGGGAGTTTAGTCACCAAGAGAATGAGTCAAAGGGCAGCATAGATAGTGAGAATT
Gma.4487.2.S1_at	AW508329	At4g26470	1e-27	Signal Transduction	Protein Kinase		TCTTTTTTCATTTCAGGTTGTTCACCAGTTTGAGTTGTTGGATCTCCTCCACTGCTTCTTCTCCTGATCCTGTTCTGTTTCAAATTTCAACCCAAGGAGCTTGGGAACAAACTCCTGCTCCTTCTTCTCCTTGGTCATAGGCAATGGGAGGTGCACTGGGAAAGAGTGAATCACCTAGAAAGGGATCGATGCCAGAAACTAAGCTCGAGGCTAAAATGGTTGAAGCAATGCAGCGGAGGGAATCTCAAGGAAGTTCCGTGAAATCATTCAACACTATAATCTTGAAATTCCCAAAGATTGATGAGAGCCTTAGAAAATGCAAAGCCATATTTGAGCAGTTT
GmaAffx.45414.1.S1_at	CD408696	At5g28830	2e-08	Signal Transduction	Calcium-Binding		AGGAGCTTCCTTGAGAGAAACGCAAAGGAATTGGGTTTACCGCTAGCTCAAGCTGATGAAGCAGTTGTTCTTCTTTATGACGCTGTTTTTGCTGAAATAACACAAGAAAAANNNGGTGCCGAATTAGATAAAGAAGAGCTGGCAAAACTTGTGAAGAATATCCTCGAGAAATTCGCAGATCAGCTTGAGGTTAGTCCTGTGTATCAGGACTTAGCTTGAGGACGATGAGTAAATCGGACACATTTCATGTTATGTTTGAAACTTTGCATCATTACAGAGTATTTGGAATTNGCACCCCCTCTCACCCAAACATCAACAATATGTATACTGTATAATGAATTTTACTTATGTGGATTGTGGAGGTGCCTTAAATAGCANTGGGACTTGGGTAATTTTGTT…
Gma.1007.1.S1_a_at	CD402215	At1g18210	1e-24	Signal Transduction	Calcium Binding		AGGCGTTCGAGCTGTACGATCTGGACAAGAACGGGCTGATCTCGGCGAAGGAGCTGCACTCCGTGATGCGGAGGTTGGGGGAGAAGTGCTCCCTCAGTGACTGCCGGAGGATGATCGGAAACGTCGATGCCGACGGCGACGGCAACGTCAATTTCGAAGAGTTCAAGAAGATGATGAGTCGCTCGTAGGTGATGGTAGCTAAGTGACTCATTTATTTAAGTGAAATGAATGACACCACATTTTAGGATAATTCTG
Gma.6359.1.S1_at	CD398481	At2g46600	4e-43	Signal Transduction	Calcium Binding		CAGAGTTTGAGGACTTGCTGCCAGTGATGGCAGAAAAGCTGGATGTGGAGTCCTTTGTCTCTGAACTATGTGGAGGTTTCAAGCTTCTATCGGACCCGGAAACTGGTTTGATCACGAGCGAGAGTCTAAGGACAAANTCAGCTCTTCTNGGCATGGAAGGGATGAGCAAGGAGGATGCAGANGCTATGGTTAGACAAGGTGATCTTGATGGAGATGGAAAGCTTAATGAAACTGAATTTTGCATCCTCATGGTGAGGCTTAGCCCTGGAATGATGGAAGATGCTGAGTCATGGCTGGAGAAGGCAATTGATGAAGAGCTTAGCAAGTCCTCATCTTAGAGATAATTGGTCCCCTTTTGTAACCAATTGTAAGTTATGATATATGTATTTAATAAATCTT…
Gma.2566.1.S1_at	BE820790	At2g17290	1e-115	Signal Transduction	Calcium Binding	Calcium Dependent Protein Kinase	AAAGGCAACGCTGGAATTGGTAGGAGNACTATGCGCAACAGTCTGAATTTAAGCATGAGAGATGCACCAAGTGCTCAATAGCTTANGATTGTGCTCATTATGTACAGGTTNGTATGCAGCAAAGCCAGAAAGANAAAAANAAANNANAANNNTTTNNNAAAAANNTNNTNNTNTNNNNNTNACCNGTCCTATCCCTGAAGAACAATCAGGATTGTGGGTGCTCTCGCATGAGGANTCATCNAGNGTTACATTTATGTGCTGTATGAGTGGAAAANTTGTTTCTCGCTTTGTAAACCTTAGTGTTGGGTGTTACAGCTANTTCAAGTTGGTCTTCTATTTTTNCTGTGNTTTCATGTAGGGGCATTCTGTCTATAGTTNAAGTAGAAGGATTTTGATCTT…
Gma.1517.2.S1_a_at	BE059859	At4g23650	9e-30	Signal Transduction	Calcium Binding	Calcium Dependent Protein Kinase	CCTCTAGATGTTGCTGTTTTATCCAGAATGAAACAATTTAGGGCAATGAACAAGCTAAAGAAAGTTGCTCTGAAGGTTATTGCTNNNANCCTTTCTGAAGAAGAAATCATTGGTTTGAAGGAAATGTTTAAATCCATGGACANAGATAANAGTGGAACAATCACTTTTGAAGAGTTGAAAGCTGGTCTGCCAAAACTGGGTACTAAGGTTTCTGAGTCTGAAGTAAGG
Gma.17655.1.S1_at	BE057259	At5g24430	2e-35	Signal Transduction	Protein Kinase		GGGATAGAATCGCTACCACAGCTTTNGAGTATTTTGAGGAAACAGGAAACCGNGTCATTTCAGTTGAGGAGTTGGCTCAGGAGATGAATTTGGNTCCATCAGCCTACTCTTNAATGGGTGATTGGATCAGAAAATCTGATGGAAAACTCAGCTTGGTCGGATATACAANAGTTTTNGCATGGTGTCACAATGCGTAGTTCAAATACAAGACACCGACAGCTAGTATAACNNAAAGGGAGATTTTNTTATTATTATTNTNNTTNTTNNNATTANTNTNNNNNTTNTTNNTNTNNTTANNNTNANNTNNNNNGAAANNNGNTNNNGNNNNTNTTTCTTTCTTTAATTTGAATTGAAAGGAAAAATGGTACGGAGGGTCTTAGCAATTTTTTCGGGGGGTTT…
Gma.662.1.S1_at	CD409953	At1g70670	3e-68	Signal Transduction	Calcium Binding		TGGGTACTTATTATCGTCCGTTGCTGCTATTTTCATCAATGGAGGTNTCAGTCANAAAACCCGCCCGGGAAAGTTTCCTTCAATACTGCTACCAATTGAAGTTCAAAACATCCATAGAAGCAAGCATGGAAGTGACTCTGGTGTCTACGATAGTGAAGGAAGGTTTGTTCTTTCAAAATTTGAAGAAATTTTCAGCAAGCATGCTCGAACACACCCAAATTCTTTAACATCTGATGAATTGATGGGGATGCTTGTGGCAAATAGAGTTCCTAANGATTACGCTGGATGGCTTGCTAGCTACACGGAGTGGAAGATCCTATATGTTCTTGGCAAAGACAAGGATGGTTTACTGCACAAAGAGACTATTCGAGCTGTTTATGATGGAAGCCTCTTTGAAAA…
Gma.15250.1.S1_x_at	AI856228	At3g10190	2e-46	Signal Transduction	Calcium Binding		CTCCCGGGCGTCTCCGGAGACTGGTCCGACGTCGCCGCCGTCGACGTGCGGTGGGACCTCGCCCAGGCCTTCCGCCTCATCGACCGCGACAACGACGGCGTCGTCACGCGCCAGGACCTCGAGGCCCTCCTCACGTGCCTCGGCGCGTCGCCGTGCCCCGACGACGTGGCGGTCATGCTCGGCGAGGTCGACGGCGACGGCATCACCGTAGAAAGGCTCATGAGCTACGTCGGGTCGGGTCTGAAACCCGGGTCGGATCCGGACGAGCTCAAGGAGGCGTT
Gma.1965.1.S1_at	L01432.1	At3g43810	9e-77	Signal Transduction	Calcium Binding		GATGGCCAAGTGAGTGATCATCACATTATGGCCACAANAACCTAAATGAAGAANTGTTGATTAAAAGGAAANGACCAAAAAAACAGNGGTANGNGGAAGGNCAAGGGTTTGGGNNGTATAACAGTGATGTAGTAGTCCTTGNCCTTTCTTCTTCCTACATTTNTATTTGANGGTTTTTGAATCCAACCTTAAAATGTCAATTAGTGGCAANTCCTGCTACTAATGGNTGTAGTGGAACTGAACCTTCTTAGTTTGTCTNGTAATTTTNTCCAAGAAATAAAGGGTTGTAATGTTAATGTCNCTTCNCNTTCTNCCNCTCANNNNNNNNNNNNNNNNGATGACGAATATTGTGATATTTGACATGCATCGTAGTTTATTTGAAAAGTC
Gma.1965.1.S1_x_at	L01432.1	At3g43810	9e-77	Signal Transduction	Calcium Binding		GATGGCCAAGTGAGTGATCATCACATTATGGCCACAANAACCTAAATGAAGAANTGTTGATTAAAAGGAAANGACCAAAAAAACAGNGGTANGNGGAAGGNCAAGGGTTTGGGNNGTATAACAGTGATGTAGTAGTCCTTGNCCTTTCTTCTTCCTACATTTNTATTTGANGGTTTTTGAATCCAACCTTAAAATGTCAATTAGTGGCAANTCCTGCTACTAATGGNTGTAGTGGAACTGAACCTTCTTAGTTTGTCTNGTAATTTTNTCCAAGAAATAAAGGGTTGTAATGTTAATGTCNCTTCNCNTTCTNCCNCTCANNNNNNNNNNNNNNNNGATGACGAATATTGTGATATTTGACATGCATCGTAGTTTATTTGAAAAGTCAATGTGTGATAT…
Gma.8412.1.S1_at	BF596775	At3g16500	2e-54	Signal Transduction	Phytochrome		GTGCCATGGCACATGTTTGTATCAACAGTGAAGNGGCTACGAGTGTTGAAGAGTTCTGAGCTTTCTGCTTTTACCCTTGGGAGTAAGCAAGACAAGATACCCCTTGACTCAGCAATGAAATGAACAGCGGTTTGAGGTTTTGATCACCTGCTGAAAACTTGAAGACTCTTCCTAATTTGANGTTTTGGTTCTNTTGTCTGATGAAAAGANCATGGAATGAAGCTAGTTGCGTACATTACAACTAAGTAATGTGATGAATGTGTCTTTTTTTTTTTTNTTTNNNNNAAATGAAGATTTGAAATGTTTATGGGTTTTGTATAAATAGGGAAGGGAAACTTCACGGATGTGTGTACTTATGATTTACTGTTGAGTANCCNTTAACTTGTTTTGGTTTGTATT…
Gma.14332.1.S1_at	BQ628297	At2g03150	6e-27	Signal Transduction	Calcium Binding		GAATCCAAGGCCGATCTACAGGTAAAAGAAGAAAAGGAAGGAAAGGATGAGATTAAGAAAGAAACTCCTACTGCTAAGGAGGTTGTTGTGGACAGAGAATTGTTGCAGGCTTTCCGGTTTTTTGATCGCAATCGTGTTGGGTACATCAGGGTTGAAGATATGAGAATAATTATCCATAATCTGGGGATGTTCTTTTCGCACAGGGATGTCAAGGAACTAGTACAGAGTGCATTATTGGAGAGCAACACTGGGAGAGACGACAGAATTCTNNNNNNNNNNNTNNNGCNNNNGNGTGATATTTGATGCCCCTTGTGTCTATTTCATTGTTTACGAAACACTGGAATTGCCTGTGTTGGGACTTGGGATTAATGAAAGTTGCTTTTGTAAAATTACAGTTGG…
Gma.3083.1.S1_at	BE474466	At4g33430	0	Signal Transduction	Protein Kinase		AGCAATGGCAGAAAGACGAGACGTTCCGGCAAGACTTTAACAGCAACATACATCACCCTAATGCAAATTGGATAGTAGATTCAACTTCCCATATTCAGGCAGATGAACTATCAGGTCCTAGATGATAACATTCTAAGGACAGGTGAATACACAATACTGCCGGCTTTCTGTTGGAAAGAGATATACTTCTGATTTGTGCATATGATTTTCGCCCCCTCTACCTTTTCTCTTGTTTTCATCCTTGTGCGCAGATTCCATGCCCATTGGTCAGTTGTGATTATTAAAGAAAGAAAATTGTAATTTCTTTTGGGTTGTCAAGTTGCAGGATCAAGTGTATGTTACAACTTACTAGCAACTTTTGTCATTGTAGG
Gma.3203.1.S1_at	CA819240	At4g33430	0.0008	Signal Transduction	Protein Kinase		GGTCCTAGATGATCCCTTTAACATTCTATGGACAAGAGTGAATACACGATCTTGCCTGACAAGGCTTTCTGTTGGAAAGAGANNNNNNNNNNNTTTTGATTTTGTGCATATAATTTTCGTCCCCTCTACCTTTTCTCTTGTTTTCATCCTTTTGAAATTATCTTCTGTGCTCAGATTACGTGCCCATTGGTCAGGTTGTGATTATTAAAGAAAGAAGATTGTAATTTCTATTGGGCTGTCAAGTTACAGGATGAAGTGTATGTTACAAGCAACTTTTGTCATAGTACGTATGAGGA
Gma.1423.1.S1_a_at	AI960045	At1g19350	1e-62	Signal Transduction	Unclassified		GCAGCAGATCGCTGCCCAGGAAGGCATGCAGTGGGGTTCTGTTGCCGAGAGAGGCAGAGGAGGCTCCGATTTTGACTTCGAGAATGGCAGAGT
Gma.1423.1.S1_s_at	AI960045	At1g19350	1e-62	Signal Transduction	Unclassified		AATGGATGATTTGGAGCTTACTCTAGGAGTTGGAAAGGCTTGATTTGATGATGCTATTGAAATCATCCCTTGCTTGGATCTGCTACTACCCTCAGGGCAATTGGTTCTTGTTATGCTTAATTTCTCTATATTTTTCCTTTTATGTGTACAGTTTTTCATTTATATAGCAGTTGTTAGGTGTTACATTACTTGGAATTTGACTTCATTGTAATGCC
Gma.5111.1.S1_at	CD393948	At5g63400	5e-15	Signal Transduction	Unclassified		AAGTGCTGTCTTAAAACATAGTTCATCTTTTGATCTCGGGCTTGAACNGCNATTGTTTTTTTTTTTTTTTGGCTATAGGCAAACTTTTGTTGCCCATTTGATCCTCGGGCTGTTCTCAAAC
GmaAffx.92229.1.S1_at	CF806381	At1g26480	9e-75	Signal Transduction	14-3-3		AGACAACCTTACTCTCTGGACTTCCGATTTACCAGAGGATGGAGGTGA
Gma.596.1.S1_at	AF228501.1	At2g42590	1e-109	Signal Transduction	14-3-3		AAGCCTTTGATGATGCTGTCTCGGAGCTGGATACCCTGAATGAGGATTCTTACAAGGACAGTACCTTGATTATGCAGCTGTTGAGGGATAACCTTACTTTATGGACTTCTGATATCCCCGAAGAGGGTGAGGACCTAAAAATGGAAAGCGCAGCCAGGGTTGATCAAGGAGAAGATGAGTTAGGCCGCTAACCCATCATTCTGTCATATGTCTAAGATTTGATGCATTAATTTTTCTCAATCATATTTTCTCCATTGTAGTGAAGCCTCTATCTGAATGGTGCACTGCACCTCATCAACTTTGAGTCATTCTTATTTTTGAGTGATGGCCTATTTGAGTCATCTACTTCATTTTTATGCTATTGTTGAGTAGTTTTATTCATGTGTTTGTGACACAAAA…
GmaAffx.91867.1.S1_x_at	CF807592	At1g78300	2e-77	Signal Transduction	14-3-3		CGCGCTTTCTCTCTCTAGGATTCGACAATGGCGGCCGCTCCCTCGCCTCGCGAAGAGAACGTGTACATGGCGAAGCTCGCCGAGCAGGCCGAGCGCTACGAAGAGATGGTGGAGTTCATGGAGAAGGTCTCCGCCGCCGCCGACAACGAGGAGCTCACCGTCGAGGAGAGGAACCTCCTCTCCGTCGCGTACAAGAACGTGATCGGAGCGCGCCGCGCCTCGTGGCGCATCATCTCCTCGATCGAGCAGAAGGAGGAGAGCCGCGGCAACGAGGACCACGTCTCCGTCATCCGCGACTACCGATCCAAGATCGAGTCCGAGCTCTCCAACATCTGCGACGGTATTCTCAAGCTCCTCGA
Gma.5304.2.S1_at	CD410657	At2g24940	3e-42	Signal Transduction	Steroid Binding		ATCCATTGGTATGTGCGATCGATCATCTCCTCTGCGAAATACAATGGAGCTGACAGCCCAGCAGCTGAGCCAATACAACGGCACTGACCCATCGAAGCCGATCTACGTGGCGGTGAAAGGCCGAGTCTACGACGTTACCTCCGGAAAATCCTTCTACGGCCCCGGCGGCCCCTACGCCATGTTCGCCGGCAAAGACGCCAGCAGGGCCCTCGCCAAGATGAGCAAGAACGACGAAGACATCTCCCCCTCCCTCGACGGCCTCTCCGACAAGGAGATCGGCGTTCTCAACGACTGGGAGAACAAATTCCAAGCTAAGTACCCTGTCGTTGCTCGTCTTCTCAATTAATTGTATTCTATCTATCATATGACATCATCTCACCCTAATAACTAATAATAAAA…
Gma.2849.2.S1_at	BF009344	At5g52240	2e-69	Signal Transduction	Steroid Binding		AACCAGAGTCCATTGGTGAACCATTAGAATCTACTTCCCGTGATATTGATGCTGCTGCCAAGCCTACTGATACTGAAGATGGCAAATTAGAAACTCCAGCTGTTAAAAGTGATGAAACCCCTTCAAATGTTGATGCCGATAAAGAGTAATGGCTGAGTTGTGCCACAAATACCCCTGCAGAAAATGGAGAAAAAANGAACTTCATAGTAAAGACTGACCAAATGTAAGGCAAGTTTTCGAAGATAGTCTAGGCCACCTCTTCTGCACCGTGCCTTTGCTTGAATATTNAGTCTCATAAATAATGAATTGCCGGGTCAATTTATGTGTGGAT
Gma.2471.1.S1_at	AI938029	At3g61140	0	Signal Transduction	Unclassified		TGGCTAATGCATTCAAGACAACTGTTGCTGGACTTGAGAAAGAACTAGAAGCACTGATTACTGATAATCAGATACAGGCTCGAATTGATTCGCACAACAAAATTTTGTATGCGCGGCATGCAGATCAAAGGAATGCCACCTTTCAAAGGGTTCTGGAAACTGGAAGGGAATTTGATCGTGATGTTCGTTCCATGTTACTGAGATCAAATCTTATCAAGCATGAGTTCAATCTTAGAGCATTACGGAAACTTTGATTATGAACTGATGATAATGGGACCAAGTTGCTATTTTATTTATAGCAGGCNTTGATCAACTATAACGAAGCAAGTTTCTGGAGTGAATCAAGGTTGCAAACGTACTTTGTGCAAACATTTAACGGCATATTATGGTTTCTTTTGT…
Gma.6092.1.S1_at	BI968757	At5g14250	1e-34	Signal Transduction	Unclassified		AGGAAACTTACTGCGACAGACGAACAAATTTCATGCGATCAGTTGTATTTGTCTAAGGCTGGAAGAGAGAGACAAAGATATGACTTTGATGACTTTGACGTTCCACAAAAGTTCAACATTTAAGGGGCTAGGAATGATGGAAGTAGATCTGGTTATGGTCCATCACCCGTTTCCTTTATCTTTTGTTATTCCTGGTTCTGAGAGTGGGGGAGTGTTTTATTTCAGTCCCAAATGGAAGAGTGCTTGTTCTGAGGATGTTGAATTGTCTCAACTTATTAACTATA
Gma.9902.1.A1_at	AW395328	At1g02090	6e-09	Signal Transduction	Protein Kinase		CGACATCGACTTCAGAGGGCATGAGGAGATCTGCTCTGAATCTGGTGGAGTGATGGATTATGAAGAAGATCGAAGCCGACCAAAGAGGAGGCGGCATCCAATTTCTTGAAGATTTANTAGATAAGGGAGCTCATTGGAGATGGGTTCTTTAGTTGCTTGCCTGACTTTTATTCATGGCATGCGTCAACAGAGGATATCAGCTTTTGCAGACAGACAAGTATATCTCATCGATATTGCCCTTGTCTGTCACACCACAAAGCGAGATAGGGACAAGGAAAAAAAGGAGGGAAAACCTGTTAATTTAGGAAATTGATAGTGTTTCTTGAACCATTATTTAATCGTCTACTGAGTTGGCAATAACAAGCTGAGATGGTGGTGCGGCTATTTATTTGCGGTTGC…
Gma.2729.1.S1_at	AW396742	At1g71230	1e-135	Signal Transduction	Unclassified		ACTCTTAACAGTAAATCTAGCCTTGTATTTTGCCTCTTTTTTTCCCTCGCGCTGTGCATATTCTTGTTTTATTTCACAAGAGTATGCATGTACTGTCAACCATGCAGTGGAATTCATCTAACAGAAAC
GmaAffx.50980.1.S1_at	BE823095		0.002	Signal Transduction	Protein Phosphatase		GTTAACCAAGTTAGCGTTGGCGAGGCATAGTTCGGATAATGTGAGCGTGGTGGTGGTTGATTTGAGGAGAGATCAACGACAATCATCAAACTCCAATTAATTAACGTTGGNGAGAAACAAAACCAAAACCCTTTGTTTTCAGGACTTCGTTAAGAACGGGAAGACCAAATCAGAGGGAGGAGGGGCTTGNGGCTTTTGCTTTATCAAATGTTGATTGTAATGTAATGGGATTTTAGGTTAAAAAAACAAAGGAGCAAGGAAATTGTAACTTTGGAA
GmaAffx.50980.1.S1_s_at	BE823095		0.002	Signal Transduction	Protein Phosphatase		AGGCATAGTTCGGATAATGTGAGCGTGGTGGTGGTTGATTTGAGGAGAGATCAACGACAATCATCAAACTCCAATTAATTAACGTTGGNGAGAAACAAAACCAAAACCCTTTGTTTTCAGGACTTCGTTAAGAACGGGAAGACCAAATCAGAGGGAGGAGGGGCTTGNGGCTTTTGCTTTATCAAATGTTGATTGTAATGTAATGGGATTTTAGGTT
Gma.5924.1.S1_at	AW349257	At1g12910	1e-169	Signal Transduction	Unclassified		GATTGAGCAGCTTCAGTGGTCGTCTTCGCAGCCTGATTGGGTCGCTATTGCTTTCTCCACCAAGCTTCAGATTCTTAGGGTTTGAAATTTNATTNNTNNTNNCTNANNACTTCTGNTTNNNNTCCCTGTATGTGCANNCGAAAATTGGGGATACTTNAGATTTGAANACANNNNNCAGTTGTATTGTTGTNTCTTTNANNNNTGAAACCAATGTTAACCTTGGTAATTTCTGGCTTTGGGACGAAAGTAGTTTTGATTAGGGTTTAGGGCGTAAAACTAGCCTTAGTTTGTTTCTGCTAAGTTAGTCTGCAAGTATTTTAAAGAAATTTTCCGTCACATCAATATTGGCTTCAATGTCGAGGTTTTTGGATTATCTGTGGCTGCATTGTGAAGGATTGA…
Gma.2222.1.S1_at	CD416168	At4g39120	1e-123	Signal Transduction	Unclassified		TTGTGCGGACCTTTCTCAAGCATACCTGTACACCACAAGCCCACATCTGTTCAGTGGAGATGCAGAAGAGGCATTCATTCGTGTTAGAAGCAAGGTTAAAATTCCATTGTATGGCTGCGACTGCTATGCATATGCACTTTTGTCTTCTGGTTTTGTGGATCTTGTTGTTGAGTCTGGTCTGAAGCCATACGATTTTCTTGCATTGATTCCTGTTATTGAAGGCGCTGGAGGTGTCATAACTGATTGGAAAGGAGATAAACTGTTTTGGGAAGCTTCTCCACTTTCAATCGCCACAAGTTTTAATGTTGTGGCTGCTGGTGACAAACAGATTCATCAACAAGCTCTAGATTCATTGCAGTGGAAGTGATAGCTTGAATTAATCTTCAGTGCAAATAATCT…
GmaAffx.76914.1.S1_at	BQ452751	At5g16000	2e-29	Signal Transduction	Protein Kinase		TATGTACTCAATACCTTCCAAGCCACAGACCAAAGATGTCTGAAGTGGTTAGAATGCTTGAAGGAGATGGTCTTGCAGAGAAATGGGAGGCCTCACAGAGTGCTGAATCCACAAGAAGTAGAGGCAATGAACTCTCATCTTCGGAGCGCTACTCNGATCNCACTGATGACTCTTCATTACTNGCCCAAGCAATGGAACTTTCTGGACCAAGATNATTCACAAAGTCACNGTGACANTNAAGTTGGTGAAGAGTNAAAGAAAGTGNAAGTTTCTTCAAATGCAAGTNCCTGAGTTGCAGNGNACTTGATGTAACATTAGTAGCATCTCAAAGAGTGATGCTAGTTTCTGACTGTACANAATCTNNTTGGAGACATTGACGTATAGATTGAGTGTTATGTG…
Gma.2606.1.S1_at	BE657993	At5g48380	1e-104	Signal Transduction	Protein Kinase		GGTGTAGACCAGGAGCTTTTCCAATTTCTGAAGGTTGCANGNAACTGTGTTACAGCAATGCCAAAGGAGAGGCCTACCATGTTTGAAGTATACCAGNTTCTAANAGCCATTGGGATTAATTANAATTTCACAANTGAGGATGAGATCATGCTCCCTATAGACACTGGTGATGCTGATAACTTAGAAGAACTTATTGTAGCTCGAGAGGGACATAATTGAAAAGGTATGCGAGATATAATTAGGGCATGTAATCAATTTTAATATGTAAGTATCTCTTGCCTTGTGGTCCTAAAATAAATGTTAGTGCTATATANAGGTTTTATGGTNNAGATCCATTTGTGTGCTATCAATATTGAAACATCAATTTAATATCATCAACCATGAANGCNNATTATATAT…
Gma.15907.1.A1_at	CD407154	At5g21090	1e-15	Signal Transduction	Unclassified		CCTCAAGATCTTAGACCTATCAAACAATGATCTATGTGGTACTTTCCCGACATACGGCTCCTTTTCCAAGTTCTCCCAAGAAAGTTTCAAGAAT
Gma.15907.1.A1_s_at	CD407154	At5g21090	1e-15	Signal Transduction	Unclassified		GGACCAGAATTAATGGGATTCGTCAGATATGATACTGGAGAAAGCTGCAAATGAAAGATCCTGGATTAGGGAGCGCTTCATAGGAAATGTCTGTTTTCCTTGCATCCGTTTCTAAATTACTTTCTTATAACAAATTACCAGTATTATGCACTGTTTTCGTTTCAAAGCCAGTACGGATGGTTTGGGATGTCTATT
Gma.8468.1.S1_at	AF244890.1	At5g65700	0	Signal Transduction	Protein Kinase		TGTCTCTCTTCTGGGATTGGTTTTTTTTTTNNNCCCTAACTAGAAGGTGTTAATGTTTGGATTTTTTNATGGTTTTGTACAGTAGGATTGATGGGGGTATTTTCTTATAAAGTCACTGTCTTCATCATGTAGTACTGCTTTTTAATTTTTATTTGCGACCGTTGTTG
GmaAffx.38649.1.S1_at	AW349731	At5g40440	2e-90	Signal Transduction	MAPKK		ATGGACCTGATGATTTGTGGCAACATACAAAGAATTTATATAGCGAAAGCTCAATTTTCAGTTTCTCTGGGAAACAACATTGTGGTCCAAGTAATATCTNTACATCTCTATCAAGTATTAGAACTACATTNGTTGGTGACTGGCCTCCTGAAAAGTTGGTGCATGTTGTTGAGAGGCTCCAATGCCGCGCTCACGGTGAAGANNGAGTTGCAATTAGGGTANTCNGGATCCTTCATAATTNGAAANNAGTTCCTCATATGTGGAGATGGCATTCAAGTAGAGGGCTTGCCAAACTTCAAGGATCTTGGAATTGACATTCCTAGCAAAAGAATGGGTANATTTCATGAACANTTCATTGTGGAACCAANAANNNNNNNNNNNNNNNNNNNNNNNAGCCTT…
Gma.3189.1.S1_at	AW349565	At1g73500	7e-86	Signal Transduction	MAPKK		ACGCTTGAAGCGTGCAACTCTTATGTCGGCACGTGCGCGTACATGAGTCCCGACCGGTTCGACCCGGAAGCATATGGCGGGNAACTATAACGGTTTTGCTGCNGATATTTGGAGTTTGGGTTTAACCCTATTTGAGCTCTATGTGGGTCATTTTCCATTTCTTCAAGCGGGTCAAAGACCCGATTGGGCTACCCTTATGTGTGCCATTTGCTTCAGCGACCCACCGAGCCTCCCCGAGACCGCATCGCCGGAGTTTCACGATTTTGTCGAGTGCTGCCTCAAGAAGGAGTCCGGGGAGAGGTGGACGGCGGCTCAGCTCTTGACCCACCCGTTTGTGTGCAAAGACCCGGAAACCTGTTAAGTGGGTTGACCCGTTTTTTTTTTACTTGGATCGGGTGT…
Gma.6559.1.A1_at	CD401937	At4g08480	0.002	Signal Transduction	MAPKKK	MEKK	GGGTTAAACTTGTCACCTCCAACTGTGAAAGATAATGAAGATCTGACATTCATTGGATATAAAAGTATCTCCAATGTTCAATCTTCAAGTTGCTAGAGTTGGTCTCGGGTGTATTGTTGTAACAATAGTTCATTGTGTTGTGCCTTCAGAATTCAGAGTTTGCTTGCTTGTAACTTTACTCAATTTTTTAAGCACTGCTTTGGATCTAGCAATGGATAGGCAATCCAGAGAGATAACTCACCCTTTGGCTTTAACGCCATATTTGAGAATTATGGTCCACGTGTTATCTAATTAATGTGATAATTTGTCTGTTGTANCNNNNNNNNATATCAACGTCAAGCTGTAATAGGTTGTTCGAGGCTTCCC
Gma.4631.1.S1_at	BE824210	At1g10210	3e-22	Signal Transduction	Protein Kinase		GGCAAAGATGCTTGTTTTCGATCCAACAAAGAGGATCAGTGTCACTCAAGCACTTCAACACCCTTACATGGCCCCTCTGTATGATCCTAACTGTGACCCTCCAGCCGTCATTCCAATTGATCTTGACATTGATGAGGATCTAGGGGAAGAGATGATAAGGGANATGATGTGGAAAGAAATGCTTCATTACCATCCNGAATCTGCNATGGAGANTGCAGGGTTGTGCTAATGATATTTACTTCNTTTCANNGTTATGTTCCCTTTTGTTGGTGCCAGGATAGTTCTAATATCATAACTTGCTTCAAATAATTAGGAGGGCTTTGTCATC
Gma.4214.1.S1_at	CD418435	At2g43790	0	Signal Transduction	MAPK		TACCGCCGTCAATCTTTCCAGGAAAAGTTTCCACATGTCCATCCTGAAGCTATAGATCTTGTNGAAAAAATGTTAACTTTTGATCCTAGAAAAAGGATTACTGTTGAAGATGCACTGGCGCACCCNTACTTGACATCTCTGCATGACATCAGTGATGAACCNGTGTGCNTGACTCCCTTCANCTTTGACTTTGAACAACATGCTTTGACNGAGGAACAGATGAAAGAACTGATATACCGAGAGGCTCTAGCATTTAACCNNGAGTATCAGCAGTAGTNNNGATAGNCTTGTTNTCATTGGATTTGGATCGTGTGATGTNTGTGTCCATAGATCAAGNGATTTCATTGTGTATATATATCTATCATCTGAAACCAG
Gma.4629.1.A1_at	CA820195	At4g11260	4e-21	Signal Transduction	Protein Phosphatase		GTAAGTTTTGCACTTGTATCCTTAATTCCTTGTCATAATATATGCCAATTTTTAATTCCTTATTGTGGCATCTTCTCANNNNNNNNNANNTTNNNNNNNNNNNNNCANNNAANNNNNTNTTCNNNGNANNATATCAAGATGCAGATGAGGATACAAGAAGAGCAATGAAAAAGTCATTTGTTGAGTCTAATGGGACAGTTCTGTCTACAAACTGGAAAGAAGTGGGAACAAAGAAGGTAGAGGGAAGTCCTCCTGATGGCATGGAGTTGAAGAAATGGGAATATTAAGACATTTTCTGGATCAGTGTTGCATATATTTTTATGTGGGATTATTATACTTCGTTTACTTTTTTTTTTGGTTAGTTAACTACTGAACTGAAGATACTATTTTCTTTATTTT…
Gma.7271.1.S1_at	AW351017	At5g07120	4e-49	Signal Transduction	Unclassified		GCTGACAAATCAAGGGTTCGTAAGTTGGAGGAGCTACAAGAAACTATAAGAGNCACTGAAGATGCNAAGAATGTTGCAATTAGAGAATATGAGCGGATCAAGGAAAACAATAGGANTGAACTTGAAAGGCTTGATAAAGAGAGGCAGGCTGACTTCTTAAACATGNTGAAAGGATTTGTAGTTAATCAGGTGGGGTATGCTGAGAAAATAGCAAACGTCTGGACAAAAGTTGTTGAAGATACCCGTGGATATGTGGATGANANCACTTGATCTGTGGCTGTAAATGTAAATCTTCATTTTATTCATTGATGTGCCACTCTCCCCGAAATACGTCGTAGTCATGACAATAAACTAACGGAAGCTCTTTGTGGGTTCTTAGGCTCGTTCTCACACTTGTAC…
Gma.16637.1.A1_at	BE657305	At4g24740	2e-84	Signal Transduction	Protein Kinase		ATACTGGTTGAATTATGCACTGGTGAAGCTTTGTTTCAGACTCATGAAAATTTAGAGCATCTGGCCATGATGGAGAGGGTGCTTGGTCCTATACCACAGCAGATGTTAAAGAGAGTTGACCGACATGCAGAGAAGTATGTCCGAAGGGGTAGATTGGACTGGCCAGAGGGTGCAGCCTCACGAGAGAGTATTAAAGCTGTAATGAAGCTTCCCCGACTACAGAACATTATAATGCAGCATGTTGATCATTCAGCTGGAGATCTTATACATCTTTTGCAGGGGCTACTTAGATATGACCCCTTTGAAAGACTTACAGCTAGGGATGCTTTGAGGCATTCCTTCTTTACTAGAGATCAACTTAGGAGATGATTTTCATGTATTTGTAAACGATTGGTCTGT…
Gma.2314.1.S1_at	AW310385	At4g24740	1e-104	Signal Transduction	Protein Kinase		AAGCTTCCTAGGCTTCAGAACCTTGTAATGCAGCATGTAGATCATTCAGCTGGCGATCTCATACATCTCTTGCAGGGGTTACTTAGATATGACCCCTCTGAAAGACTTACAGCCAAGGAAGCTCTTAGACATTCCTTCTTTATGAGAGATCAATTTAGAAGATAATTCACTTTCTAAGCTGCTGCATCATCGTTGACCTTCCTAAGGGATT
Gma.8364.1.S1_at	BE659226	At4g32660	7e-80	Signal Transduction	Protein Kinase		TTTGGGACCTATTCCAGAGCATATGATTTGCAGGTCTAACAAGGGTGCAGAAAAATATTTCAAGCGAGGATCGCGACTAAGATGGCCTGAAGGAGCTGTTTCAAGGGAGAGCATTAGTGCAGTGAAGAAGCTTGGTCATCTTAAGGATATTGTATCACGAAATGTGGACTCTTCAAGGTCCTCCTTGACTGAATTGTTACATGGCTTATTAACATATGATCCTACCAAACGCATTACAGCTCGCCAAGCCCTCGATCATCCCTTCTTTAGGAATCCTACTNNNTAGGAAAACCAGATTGACCCTTGTTTTGGAATGACTTCCATTTTAAAGATTCAGTTGCACAGGCTACAGCTT
Gma.4455.3.S1_at	CB063632	At2g02800	1e-72	Signal Transduction	Protein Kinase		GAATCTCAAAAACTACTCCTTCCAGTTTATCTATTCCATCATACAGTGAAAAAAGCAATGCCTCAAGTCTTCCCACACCAAGGTCNGAGGGTGAAATCTTGTCTTCTCCCAATCTTAAGCCCTTCACATTCAATGAGCTNAAGAATGCCACCNGAAATTTTCGNCCCGATAGTCTTCTCGGTGAAGGGGGATTTGGATATGTCTACAANGNNTNNATTGATGAACACACATTTACNGCTTCAAAACCNGGATCAGGAATGGTTGTTGCTGTNAANAGGCTNAAACCTGAAGGTTTTCAAGGTCANAAGGAGTGGTTGACTNAGGTTAANTACCTNGGACAACTGTACCACCCTAATCTGGTTAAATTAATCGGGTACTGCTTGGAGGGAGAGAACCGGC…
Gma.11892.1.S1_at	CD487688	At1g01540	2e-17	Signal Transduction			ACGCGCTTTGTTGATTGCTCTTCGGTGTGTTGATCCTGATGCAACCAAGAGGCCAAAAATGGGACATGTGATCCACATGCTTGAAGCAGATGACCTGTTATTCCATACTGAACAAAGAACTGAGGGAGAGTCTTCCCGTTCCTATCAAAGTGAGCAAAGGGACTCAAATTTAGATAAGAGAAGAGATNGAGGTGCCATTGATAAAAGTGAAGATGCTAGTACTAGATGGAGATGATAACAAGCTGATAATTTAATGGAACTACGTGCTTATTTTTTGGTCTCTATTAGTTTGCCAATTCTTGTGTGTAGGTTAATTTAAAAAAATGATAGTATCTTTTTTTCTNTCTTTATTATATAGTTTTCCATTGTTGTTATCAGCCCCAGCTTGGGATTCATATT…
Gma.17790.1.S1_at	BF425730	At1g79570	1e-144	Signal Transduction	MAPKKK	Raf	TCTTTTGGCATTGTCTTATGGGAGATTCTTACTGGTGATGAGCCATATGCTAATATGCACTATGGCGCAATCATAGGAGGCATTGTGAATAACACATTAAGACCTACAATCCCTAGTTATTGTGATCTTGAGTGGAAAACACTAATGGAGCAGTGTTGGGCACCNAATCCAGCAGTNAGGCCATCCTTNNCCGAAATTGCTCGCCGCTTGCGTGTGATGTCTGCAGCCGCTAGTCAGATCAAAGGACAGGGCCACAAGGCATCTAAATGAAAANCANCNGATTTGATCTGATTGCCACACACGGTTCATTCAATTATGCTCCAAAAA
Gma.10515.1.S1_at	BM528701	At2g11520	1e-122	Signal Transduction	Protein Kinase		CCTTATCTTGCCACTGGAGTACTTTTTTCTGTGTAGAGTTGGCACTGGATTTTGTAATATATGAATTTGTTCTTTAGGATGAAGAGCAATAGCTAATTTGGGTGAATTCATTATCTATGGTTGTGCCAGTTTTCATGTTATA
GmaAffx.56354.2.S1_at	BI426749	At3g03940	1e-108	Signal Transduction	Protein Kinase		GGAAGTTCCTTGGTTGTCATGTCCAAAGGAACTCCTTACACGCAGCAGTCCTACAAAGTGAGTGAATCATTTCCTTTCAAATGGATAAACAAGAAGTGGAAAGAAGGATTCCATGTTACCTCAATGACTACTGCTGGCAGTCGCTGGGGTGTTGTTATGTCCAGGAATGCTGGGTATTCTGATCAGGTTGTGGAGCTTGACTTTTTGTATCCCAGTGAAGGAATCCATCGTCGATGGGAGAATGGTTACCGGATTACTTCTATGGCTGCTACTAGTGATCAGGCAGCCTTCATACTGAGCATACCAAAACGCAAATTACTTGATGAAACTCAGGAGACACTGCGTACATCTGCTTTCCCTAGCACCCATGTTAAGGAAAAATGGGCCAAGAATCTCTAC…
Gma.10826.6.S1_x_at	BI786194	At5g55190	1e-107	Signal Transduction	Small GTPase		GAGATATCTGCTAAGAGCAACTACAATTTTGAAAAGCCATTTTTGTACTTGGCCAGGAAACT
Gma.16292.2.S1_a_at	BG881987	At1g75840	6e-45	Signal Transduction	Small GTPase		GAGTGCGTCCAGGTTCATCAAGTGTGTCACTGNGGGTGACGGTGCCGTTGGCAAGACTTGCATGCTCATCTCCTACACCAGCAACACTTTTCCTACGGACTACGTGCCAACTGTCTTTGACAATTTCAGTGCAAATGTAGTTGTGGATGGAAGCACTGTGAATCTTGGGTTGTGGGATA
Gma.4536.1.A1_at	BI945486	At4g18250	1e-08	Signal Transduction	Protein Kinase		GAAAACTAGCAATTGTTGGACTTTGGTGCATTCAGTGGCAGCCATNNANCNGGCCATCCATAAAATCTGTCATACAAATGTTGGAAAGTNAANNNGNNNNNNNATTAACTGTTCCTCCTAATCCATTTCACTCATCNACTTCCACNATTCCTAGTGGATTCACTTCGGCAAGACTACCTTTGGAATTGGA
Gma.9853.1.A1_at	AW350335	At3g21630	4e-09	Signal Transduction	Protein Kinase		GTTGCTCTTATGACACTTTCTTCAACTACCGACGATTGGGATGTTGGTTCCTTCTACGAAAATCAAAATCTTGTGAATCTTATGTCCGGAAGATAGGATGATACCAGATTAATTGTTTTGCATTTACAATTATATGTTTTGGACCAATTTTGGGCAACACAAAAAATTGTTGAAGCGAATGATGTGTGTAAAATGGACATAGGAATAAGGAATTTGTAGATTTTTACTAGTCAGGACTCAGTAGAAAGAGTGTCTAGTTTAACAATTTTATGATAATTCATAACCAATGCACAAAG
Gma.5722.1.S1_at	BU546228	At4g10730	4e-64	Signal Transduction	MAPKKKK		AATCCCGGATGATTAATTTGACCGANGAACTGACTTATGAGAAGTTAAGATANGTGCAGTTGCAACAACAGCTNNNTGNTCTCTACAGCCAGGAACAAAATGGGGAAAGAGAGGAATTTGCATGAAAGCAGATAATTATGAACCTCCAGGCGAGTGATCAATCATACGTTGNNCTCCAATTCTTTCTCTTTNCTGAGGAGAACTACTTTTTGGATGTTTATAGTCAGTCCTTGATAAGTGTCATATATATATNNNGNTNTATNNNNNNNCTGATCCAGCCTTGTGTTCAATAANCTTTTGTGACGATCTATANATANNNCCCAGCTAGTGCAAATGAGCAANATGATGATCNGTCATAGTTAATNTCANTTATTTATTTCATTTAAAGATTCAGATGTA…
Gma.2407.1.S1_at	BI970419	At5g14720	7e-60	Signal Transduction	MAPKKKK		AGCATTGGAAGCCTTGTTGAGGAATTGCAAAGACAAAAGATGAAAAATGTTCAGTTGGAAAAACAGTTGAACAGTATGGCTAACAGAGTGGANNANNNNNCNNGAAGATATGAACTTTATCATGGTTTGACTGATATTGAAACACCCGACGTTCAGTGGTAACATTCAATGATGGTTTGAGACATACTTGAGGGATGGGGGAACGTCTCAATTGTAGTTGTATTACCATNTGTGAACTTTTGTTTGCGGCAGACACTACTACTAATTTTTGAGATGCTATTCCTTGAGTTACATGTAAAATGTAATTTATTGAGATAATGAGATCTTGTAATTTAAACACCTCTTTCTCTCTTATATCNNACCTAAAAGTTACCCTTCAGAATTCAGATGAACGCAANN…
[truncated: 779 more rows]
