# Supplementary material for: Microarray Detection Call Methodology as a Means to Identify and Compare Transcripts Expressed within Syncytial Cells from Soybean (Glycine max) Roots Undergoing Resistant and Susceptible Reactions to the Soybean Cyst Nematode (Heterodera glycines)
Source: Hindawi journal article supplement (doi:10.1155/2010/491217), 2010-01-01
Supplement: f10 [file 491217.f10.xls]

## Sheet: Sheet1
Probe Set ID	Representative Public ID	At Gene ID	At BLAST E-value	Functional Category	Subfamily	Gene Family	Sequence
Gma.3450.2.S1_at	BE329952	At1g62040	7e-56	Cell Growth & Division			AGGCTGAGTCTGCTCGCATTAGAGACAAGTATCCTGATAGAATACCTGTGATTGTTGAGAAAGCTGAAAGAAGTGACATCCCAGACATCGATAAGAAGAAGTACCTTGTCCCAGCAGATTTGACTGTTGGCCAATTTGTTTATGTTGTCCGTAAAAGGATTAAGGTCAGTGCAGAGAAGGCTATTTTTGTTTTTGTCAATAACACTCTACCTCCAACTGCCGCTTTGATGTCTTCTATTTATGAGGAAAATAAAGACGATGATGGTTTTCTTTACATGACTTACAGTGGAGAGAACACTTTCGGTTCTCGCTAGGGTCAAATTTAATAATATATGAGATCCTCTGTAAATAGATGCTGCAAGATGTAAACTTTCTGCTGTCGATAGTCGATGCCTATCC…
Gma.6330.1.S1_at	BE658773	At1g62040	4e-58	Cell Growth & Division			TAAGAGAGAAGTATCCTGACAGAATTCCAGTAATTGTTGAAAGGGCTGAGAAGAGTGATGTTCCTGAAATTGACAAGAAAAAGTATCTTGTACCCGCTGATTTGACTGTTGGTCAGTTTGTGTATGTGGTGCGGAAGAGAATCAAGCTGAGTCCTGAGAAGGCGATCTTCATTTTTGTTAAGAATATTTTACCACCAACTGCGGCAATGATGTCTGCAATTTATGAGGAAAACAAGGATGAAGATGGCTTTCTATATATGACTTACAGTGGAGAGAACACATTTGGGCTTGTGTTCTGAAATAATCCGTCGTGACAGGCAACCATCTGAATAGAACTTCCTAAAATTGACCAATGTTAAGAAGTCAGCTTAATTGTAAATTCTCTGGTTTGATGCTTTT…
Gma.5594.1.S1_at	BQ786297	At3g09840	3e-21	Cell Growth & Division			AGAAATCAAGGCTGCTCATTTTGAGGAATCAATGAAATATGCTCGAAGGAGTGTTAGCGATGCTGACATTCGCAAGTACCAGGCATTCGCCCAAACATTACAGCAGTCTAGAGGATTTGGAAGTGAGTTCAGGTTTGCAGATTCCACCTCCGCCGGTGGTACAGCTGCTGCATCTGACCCATTTTCCTCTGCTGGTGGAGCTGACGAGGATGATCTTTACAATTANNTNNNNTTGTATGCCTGTTATTTGTTCGTATATGCCGTGCTATCTTAATTATCTACTTCTCATTTCGTGTATGCAAATGAGGTCTGTAAACGCTTCCTTTGGATTATTATTGTCTATTGTTTTTGCAAACGGCATTTGTTCATATGGCCAGAGCATTAGGTTCGAGCCTCTTC…
Gma.2507.1.S1_at	CD409747	At4g24000	2e-84	Cell Growth & Division			CAAATTGATTAGAAGATTGAGCATTTCTTAGTTACCCTACGTATTAGTAGTACATGTAAGCCTTTT
Gma.10796.1.S1_a_at	BE819933	At5g05170	9e-26	Cell Growth & Division			GACCCGTTTACGACAAGAGTCACTGGTCCTGATGTTGAGCAGTGTGGAATCAACTGCTAGAGAAATAAAAGCTGGCAGATTGAACAACAGCTTTCCACTCACCTGTGTCAACCAACAACATAAGCCTGATGGAATGTTGTGTTTGTCTTCCAATTCTTTTGTTTACAGATTTTGATATTTGCTTCTGCTTGTTTAAGTTATGTGCAGTTAATGGTTCATACAGAGGAAAACATGTTTAAGTATGTGCAGTTAATGGTCCATACAGAAGAAAACAGGNTTAAGTTATGTGCAGTTGATGGTCCATACAGAAGAAATCAAATTAGAATCAAATCATTTAAGGTTGCTTANTTTTTTGTAATACTATGAACATACCTTCCATTCTTTTGAAGAAGC
Gma.10796.2.S1_x_at	CA935397	At5g05170	0	Cell Growth & Division			GACCCGTTTACGACAAGAGTCACTGGTCCTGATGTTGAGCAGTGTGGAATCAACTGCTAGAGAAATAAAAGCTGGCAGATAGAACAACAACTTGCCACTCACCTGTTTCAACCAACAACATAAGCCTCCTGGGAATGTTGTGATTGTCTTCCAATTCTTTTGTTTACAGATTTTGATATTTATTCTTGCTGATTTAAGTTATGTGCAGTTTATGGTCCANNNNNNGAAGAAGAAATCATGTTTAAGTTATGTGCAGTTAATGGTCCATACAGAAGAAATCAAATTAGAATCAAATTATTTAAGGTTGTTTATTTTTTTTGTAATACTATGAACATACCTTCCATTCTTTTGAAGAAGCTGTTTGTCTTATTTAAACTATTCATCAGAAGACCACATCCT…
Gma.5418.1.S1_at	BG237178	At2g21770	3e-50	Cell Growth & Division			GCTATTCTCCTGTCTTCAATCTTAACCCTACTTTGGGTGAGAATCAACCCATTNTTGGCCAAAAGTGATGTGGTGTTGGAAATTTGTGGATTGAATTGTGACTAAAGGTAACAAAAAATGGAAGGGCATGCCATGGTTTGACGTTTTACACTGATAAGATCTGCAACATGCATAAGTTTTTGGTCAAAGACACATGACACATCCCTGGATCTGTTGGTGAGAACTGCCACTGCAAAAAAAAATGTTATTNGTGGGTGGTGTTTGTAGATACAANANTATGTTTTGAGAGGTTTCATTATTTTTTTTTATACATGTGCATTATCTAAATTAGTCTGAAATCACAGGTGAGATGTTATTTATAACTTCTTCGGAATAAGGCATCTCTCATTTGTAATCATA…
Gma.10862.1.S1_a_at	BI969361	At4g32410	0	Cell Growth & Division			TGGGCAGGCAAAATCGTACCCCAACCATTGTTATTGTTTGGTCCGTTCTTCTTGCTTCAATATTCTCCTTGCTGTGGGTGAGGATTGATCCCTTCAC
GmaAffx.72045.1.S1_at	BG406239	At3g52750	8e-74	Cell Growth & Division			AGGCCAGTCAACTCACTCAAGCAGACACAACCTTCGGCACCAATTGGCGGTCTTCCTCTTTCACTGATGGTGGTTTGTTTGAGATACCAGAATTCCNANNGAAGAGAGGAGGTTCACGCTATCCGAGGGCGTAATCTTTTTCATCCTAATTTCTTTGATCCCTTGCATTTCTTCACCCTTGGATATACATAGCATTGGTCTAGTTCTTAGGTCCCTGTCTTGCCCTTTTTCGGATTTTAGTCAGAGTTGTGTATACAGTTTGTTCATGAAAGTTTATTACTTCCCACTGTCCAGACTTATGGGTCTAACCGGAGGTATTGCAGCATGGATGCTTTTCTTGGCATATTTGAATTAGTTTATTAGCTTGTACAGAGATTTCAGTAATGCTGAGAGCTTGTT…
Gma.8173.1.A1_at	BF598954	At1g26830	6e-97	Cell Growth & Division			TCGAAGCAGCCATTGTGAGGATAATGAAGTCTAGGCGGACTCTAGATCATAATAATATTGTTGCTGAGGTCACAAAGCAGCTGCAGTCACGGTTTTTGCCTAATCCTGTTGTTATTAAGAANAGGATTGAATCCCTTATTGAGCGTGAGTTTTTGGAGAGGGATAAAGTGGACAGAAAACTGTACCGCTATCTTGCTTGAACTGTATGTGCTTTTGATTTGGCATGGCNCTTGTGTGATTCTGTCTGTCATAAGTTTGANTGCACATCACAAATTGCCGCAAGTAGTGTAACTCTCNNNTGCATACTCAACNAAACCTAGATTTNTNAGGGTTACTTCNTTTCAGGCTGCNAAACTTNAATATATCNNNTTTNNNTNCTTANNTNTANNNAAAAATAAA…
Gma.13544.1.S1_at	CD417852	At3g50070	6e-58	Cell Growth & Division	Cell Cycle		GTATGAGCAAATCCCAAGCAGCCCAAGTGGCGTNATTGATGCTGCATTTTGCTCTGATGGTTCCAACGATTCGTGGGCAGTGGGGTCATCATTNNNATATTCACCACCAGAGCCTCTCTTCAAGAAGAGCAGAACCCAAGGACAACAAATGAANTTGTCACCACTTAANCGGNTCATTNTCGGAATTGTTGGCACCTCTCCTTAATTAANTANNNCCCTTTCACAAACCAAAAAAGAAGTCTTATATTTTATTTACTGTGGTAATTAGTCTTCCATGCATGTTGCTGAACTTCAGAGCCTTCCCCTCTATATGTATCTCTTCATTTCCAACAATGTCCCTCATTCATTTAACATTTCTTGAAGAGGCAAGGTGGTGGTGGTTCAGGAATGAGTGGTCTA…
GmaAffx.84584.1.S1_at	BI699835	At5g45190	5e-09	Cell Growth & Division			GAACTGGTCTAAGCCTGATGGTGAANATCACCATGGNGNNNAGAACCATGAGGAAACTAGAGANGGGCGNNACNTGANCATGAAGGNGCAGTTTCAGAAAGACATGGACGAAGACAATGCTGAAGAAGGGGAGATGATAGACGATGCTTCATCCTCGTTGAACAATCGCAAGAGAAGGATGGGGAGCCCTCCAGGTAGGCAACCAGAGATGAAAAAGCATCTTGATTCCAGTTATCACAATGATCTTGCCGAATAAAGGAACTTGCCGAATAAAGGAACTTGCTGAATAAAGGAACTGGGAAGGGGGAGAGTTGGTTATGTAGGCAGGGAAAACACAAGGAATGGGGAGCAAAATCATTGTTGAGGTGAATATTCTGCTGTCCTTTATTTGTTTATTTT…
Gma.5692.1.S1_at	BM522647	At5g48630	5e-30	Cell Growth & Division			TGAGAGAATCAATGCTGCTCTTCAGAAGNTGAGCCTGAGACCCTAGAACTTACTGTAGATGACTCAACGCTGAATATGTGGAATGAAGTTAATGCTATGGTGATTGGTCTGAATGATTTTTCTGGGTCAATGACATGTTTTAGGGTAGAACACTATCTAAATGTATCCAAAAGTAAGGGCACGTAATATTGGGGGTCAATTCAAAGTGTCCTATTAAAGAGCAAAAGGAGGATGAAAAAAGNNNGATTCTCGGTGAGGACCAGATANNNNNNNNCNNNNTNNNNANNANNTTTTGTTTTTATCTATTTATTGTCATAAATCAAAGTGTCTACAANTTTTTTAAAACTTTTTACCATTATTTAGTGTGANGAACAATTTATAATTGTTTTATCGGTCTTA…
Gma.5497.1.S1_s_at	CD414002	At2g27960	9e-39	Cell Growth & Division	Cell Cycle		GCCACACATAATGCTCTTCAGGAGGCCTTTGAATTATCAGCAGCAGCAGGAAAACCAGGCCCAGCAAAGCATGCTTGTCAAATGAACACTATCTATGCAAATCTGAAAGTGGGATTACAATGTTATATAGGTTTTAATTTTGTTGGTAATATGGATGTTATGAAGAATGAAGAACCCTGGTGGAATTCTCTTTTTGTGGAGAATTTTCATGTGGTTTCAACTGTCATTTTAATGTGTTGTTGACATGATGATGTGTCATGGATTTTTATTGGTGTACCTCTCGTGTACTCTTAT
Gma.10644.1.S1_at	BM092812	At1g79650	1e-55	Cell Growth & Division			GATCAACCTGAGCAAGATATGCCTCATGCCATCAATGTGACGCCAGCAGANCAGGAGGCAATTGGAAGGCTTGAGGCTATGGGATTTGATAGAGCCTCAGTCATCGAGGCATTTTTGGCATGTGACCATGACGAGCAATTGGCAGCCAACTACTTACTGGAAAATGCTGGAGATTTTGAGGGTTAAATCACTAACCTACATTGATTTGTAGTTTTGTTTGAGGCTTTATTTATTTATTTATTTTTGTTGGGGGGAGCATTTTTTTGTACTTAATGTGTCTTGGCAAATTTACGTGGATAGAGTTTTGGATTTGGTTTGACGTATTAACCGAGACAATGGACAAAAGTTACTCTTGATATTAGAATGGTTTAGTTTACACAACAGTGTTTCTGGTTATCT…
Gma.14281.1.S1_at	BI968274	At5g38470	1e-92	Cell Growth & Division			TGAGATTGATTCGAGACCATCAAGCTGACTTCCTTCGCNTGATAAATGAACCTGCNGAAGGTGNNGAAGGGAANATATTGGGGCAGATGGCTTCTGNNATGCCACAAGCAGTAACNGTCACNCCTGAGGAGCGNCANGCAATTGAACGTCTTGAAGCAATGGGTTTTGATCGTGCAATCGTATTGGAGGTGTACTTCGCTTGNAACAAAAATGAGGAATTGGCTGCCAACTACCTTTTNGATCACATGCATGAGTTCGAGGAACAATAGATCTNCTTTNGAATTTGCCAAATTATTTCNTGTCATCTTTTTNTCTCGATGGGTCTTTGTTACANNCTATGTTTAATGAGGTAATGCTTNNGATAATGTCAAATCTCAAGTGGATAAGGGATGTTTTANT…
Gma.4420.1.S1_s_at	CD390821	At5g38470	6e-94	Cell Growth & Division			AACAGTCAACAGTTCCAAGCCTTACGCGCTATGGTACAGGCTAATCCACAAATATTGCAGCCTATGCTACAAGAGCTTGGCAAACAAAATCCTCATCTTATGCGATTGATTCAAGAGCATCAAGTTGACTTCCTTCGCCTAATTAATGAACCNGTTGAAGGGGGTGAGGGAAATATACTGGGACAGCTNGCTNGTGCCATGCCGCAAGCAGTGACNGTCACCCCTGAGGANCGGCAAGCAATTGANCGTCTCGAAGCAATGGGNTTTGATCGTGCAACTGTATTGGAGGTGTACTTNGCTTGTAACAAAAATGAGGAGCTGGCTGCCAACTACCTTTTAGATCACATGCANGANTTTGATGAATAATTAGATCTCCTTTNCAATTTGTCAAAATANTTG…
Gma.6815.1.S1_at	BQ610426	At5g55310	0	Cell Growth & Division			CCCCTTCGAAGAGTTCAGATGGAAAGAGAAAAAAGAACTTGNGTCCCGAAATGCTAGAGAAAAAGATATCTCAAACCAATGCAAAAATTGAGAAAATGCAACGTGATATGAAGACAAAAGAAGATCTGAAAACTGTGGCATTGGGCACATCCAAGATAAACTACCTTGACCCTAGGATTACAGTTGCCTGGTGCAAGCGGCATGAAGTTCCTATTGAAAAGATTTTCAACAAGTCTCTGCTGGCGAAATTCTGTTGGGCAATGGATGTGGATCCTGACTTCAGATTCTGAGATCTATAGAATGGAGCCATGTTATGATGGGTGGGGAAAAACATTTCTTTTTTACTTATTTCTTTTCTATAAGATTTTTTTTGTTTCGTCAATTTTAGCGGAAATTGAT…
Gma.17633.1.A1_at	BI974471	At3g11450	8e-51	Cell Growth & Division	Cell Cycle		CTGCCTCAACAAATAACGTAGAAGACTCTCAGAATAAAAGTACAGNATAATCAGAACTCCCCTGCTAATGGAGTTTCTTCCAGTTCAGAACAGGATGTGTGGTNTGCAGTGCAGGAACGAGCGCTGGTTCAAGCTTTAAAAGTCTTTCCAAAGGAAACAAGCCAGAGATGGGAGCGTGTTGCAACTGCTGTACCTGGGAAGACTGTGAATCAGTGTAAGAAAAAATTTGCATTGATGAAGGAGAGTTTCAGGAACAAGAAAAGTGCAGTCNAATGTTCTGTTGTGATATTTTAGATTTCACTACTAATTTTTTCTTAAGAGTATAGGCTAGAGTCGAATATCCATACATTTCTAGTTTTCTTATCGCATTGATTGCTTTTGATACCGTACTTTGAACTT…
Gma.2432.1.S1_at	BU544962	At1g67230	6e-08	Cell Growth & Division			GTGGTGATACCATCGGGACCTTTGTCAACAATATGGCCTTGAGTGAGGAGGTGAACGGAACAGCAGATGATGTGGAGGAGAATGATGCTGAGTATAGGAGTGAATCCCATGGGGAAGATGCTGCTGGTGGAGTTGAGAATGAGGATGACNAAGATTACCTGCAACCCGGTGAAGCTTCAATAGGGAAGAAGCTTTGGAATTTTTTTACAACATAACACCACAAGCTTCTTGATAATGAAGCTGTGTCTTGACCTCATCAACTTTAGGGATGATGTCGGAAGTTTATCTTGTATTAACAATTGGAAGTAGATCTCTAAATTATAACCACGAGGGGTAGTACTTAGGAGAGGTGATTGAATTTCTCTAGTTTTTTTTTTCTTGTACGTTTTCATGGATGTT…
Gma.3590.1.S1_at	AW102235	At1g15130	2e-60	Cell Growth & Division			ACAGCCACCAGCAAACCATGAGTATGGCCAACCAGCATATCCCGGATGGCGTGGTCCGTACTACAATGCACAAGCACAGCAACCTGGTTCTGTTCCTCGGCCTCCTTATACCATTCCATCTCCATATCCTCCGCCTCACCAAAGTGGCTACTATAAGCAGCAATAGTGTTCATCCATACATCTTGTAGGATAAAGAGAATATTCTTTCTGATGCCATTATCTCTTGAATAAATGAGATTCAGCCCTTTATCTTATAAAAGCCTTTGCATTGAGTGAATCTTTTGTAGTTTCTGTTTTCTNTNTNTATGGTTTGTGTTGGTTTGCGTCATCATTGGATTGTGTGCATAGTTGATCTTAATACAACGTTGTATGTATAGTTTGTTTGACTTGTACCTTACG…
Gma.6791.1.S1_s_at	BE801043	At1g03080	8e-15	Cell Growth & Division			ATGTGTGCGACCTCCCACCAAGGGAGATTGATTGTTACCATATAGTTTGAAGTAAGTGAGACATTAGCTTTCTTGTTTGTAAAATTTTGTTTCTAAGGATGCTTCAAGACCCTACATATTTTGATCATGCTGTACATGTTGTGCCTCATTTACTCGTAAGAAGAGGCCAAGGCTA
Gma.5287.1.S1_at	CD403895	At3g48390	3e-62	Cell Growth & Division			GTGTCTTATTGTTTCTCTCATGTGTGTTGTCCTTTAGCTCCCACCGAATGGTGAATATGGATAATGGATAAATCTGGCTTCTAATGATCCTTTTATTTTTTTGTTCCTTTTACTTACTCTTTTTTCCCTGAATCATCTCACCGACAGAGTTTCCTGTTATCTCAGCCATTGTATAAAGTTAAGTTGGTCGCATTCCATTAACAGCTTTTTAGGATGTTGTATTGCACCAAGA
GmaAffx.90790.1.S1_s_at	CF806515	At5g63190	2e-47	Cell Growth & Division			GAAGCATGCCAGTGTATCCGTGACCTGGGAATGCCTTTCTTCAACCACGAGGTTGTCAAGAAAGCTTTGGTTATGGCCATGGAGAAGAAGAATGATAGGATGCTGGATCTGCTGCAGGAATGTTTCAGTGAAGGTCTAATAACCATCAATCAGATGACCAAAGGGTTCACCAGAATCAAGGACGGTCTTGATGATCTCGCTCTGGACATTCCAAACGCTAACGAGAAATTCAGCTTCTATTTGGAGCATGCCCTGAAGAAGGGCTGGCTCCTACCATCATTTGATTCCACTGCCACAGATGTCTAACTGGCCCAGGCTGCAGCAGCTTCTTGAGGAGGACTATATTTTCATTGTTTCTCTTATATATGTTGTTGCACTTTAGCTTCCGCTGAATGTGGA…
Gma.525.1.S1_at	CF921971	At5g61640	7e-68	Cell Growth & Division			TGGTTTGCACCGGAACCACTAACCACGTTGAAGTGGTTCGGGTCCAGTTCGACCCGAAGGTTTGCCCCTACAATGATCTACTCGCTCTCTTTTGGTCTCGGCATGACCCCACTTCCATCAACCGTCAGGGCAATGATGTGGGTGCACAGTATAGATCAGGAATATACTACTACAACGATACCCAAGCTCGTTTAGGCCAGGAATCAAAAGATGCAAAACAATTGGAACTGAAGGAGAAGATTGTGACAGAAATACTTCCAGCAAAGAGGTTTTACAAAGCAGAGGAATACCATCAACAATATCTGGAGAAGGGTGGAGGTCAAGGCAACAAACAATCCGCAGAAAAAGGCTGCACTGATCCCATCAGGTGCTATGGCTGATGAATGATGATCACTTTCT…
Gma.13541.1.S1_at	BM092024	At3g14890	2e-11	Cell Growth & Division			ATATGTTGTAGATCCTTTTTTGTTGGTGATGCAGCCGGGAGAGAATCAGATCACAGTGTCGCTGATATTAAATTTGCAGAGGCCATTGGTTTAAAATTTTATGTCCCAGAAGAGTACTTCGCTTGAGCATCTAATTAAGTCATTGGTTCATAGGAAGGTTAAGGTCTTATAGGTGTCCAGTTTNGTTTGAAAGTGACATTACCAACTGGAAGTATGGAACAGAAAGGATGTAAATGAATTTCTGGGCAATCCTAAACCCTAAACTTAACGCATAGTCGACTAA
Gma.437.1.S1_s_at	CD401627	At4g29350	3e-44	Cell Growth & Division			GAGTATGAAAAGTCACGGGATCTGCGTGTNGNGAAGAAAGTGTTTGATGCTTGAGAAATGATGACTATAATCTCTATCTTTGTACTTTTTTAGTGGGGTACCTGTATACATTACA
Gma.15130.1.S1_at	CA935370	At2g19770	2e-49	Cell Growth & Division			GAAATAACTGCTATCATGAATGACTTTAACGAGCCTGGATCACTTGCTCCAACTGGATTGTTTCTCGCTGCCACCAAATACATGGTCATCCAGGGCGAGCCTGGTGCCGTCATTCGAGGCAAGAAGGGTCCTGGTGGTGTTACTGTGAAGAAGACCGGTGCGGCCTTGATCATTGGCATTTATGACGAACCAATGGCTCCGGGTCAGTGCAACATGGTAGTGGAAAGGCTTGGTGATTATCTCATTGAACAGGGTCTCTAATCCTCTATTTATGTCTTGCTATCGTGCATATTTCATTGGCTTCTGTACGAGTTTTTGCATCGACCTCGACTGTAATGCTTTGATTGCAGTGTAATAATATTGTTGGGTGGGTATCAAAAGTCACGGCATGTGCGTGTT…
Gma.1422.1.S1_at	BE824233	At3g27280	1e-23	Cell Growth & Division			AAGCTGATTTCGGATGCCACTGCGTCCGCCGGGATGGGGCTGATTGAGCTCAGGAGGATTGAGGCGTCTAGGGAGGTCGCTGCCACGCTGGCCAAGTCGCCGAACGTGGCCTACTTGCCTGGAGGGAAGAACTTGCTCATGGCGCTCAATGCCGGTGGACGTTGATTCATGTATCTCTGTGTGTGGTTTTCACGATACGGTGTAATGGCATGCTTGGAAGGAATGCTGTTGAGGTTCTTCTTTGCTGGGGTTATTTTTTCCCCACCTTGTTTTGTAGACCCCATTTGTAACATGTAGAATTTGGACCTTCGCGTTGAG
Gma.15151.2.A1_s_at	BU577357	At3g27280	7e-18	Cell Growth & Division			TGCTGTGTGATGACATGCTTGGATCATCNTTGTCTTTAGTTTTTCCGTTGTTGGAAATATTTTTCTTGTGTTTTCACTTGTAGACTCTCTCATTTGAGCATAGTTCATAATGATTTTAGGAAGGTAATAAGTTAGAAATGAATTTGGACCTTCGTTTTTTCATGGTGAAAGGGTCTGTTTAGTTGCAGAGTAAAAACTATCTCCAAAGTATATAAGGTGAGAGAGGAACTTGAATACTTGATTGTGTGGTTAATGTTGGTTCTTTGAC
Gma.8831.1.S1_at	AW119809	At4g28510	1e-126	Cell Growth & Division			GGCAAGGGAAATCGCTCACACAATTTCAAATTCTGCCAACAAGGTTTACTTGAATTCAGATGATCTCTTGCTGAATCTTCAGGAGTTAAANTTGGANNCCAGTGGGAAGAGATAGTTGTGAGGCTGAATTTACTTAATTACTTAAACCTCTTTTTCCCAGTATCATTCATTTTCACCTGCATGTGCGTTTTATNAANTNNNCANCNNTGAGATTCAGCGTCACACAAACTGATAGTCATTATCATTAAATGGAGCACGTGAGATAAGGGAGGTTCAATCCGGGTTTATCCATTTTCAGTGGTTCTGAATTCTGATCTTGAATAATGAATAGTGGCTAACTTTGTCGGATGTCAAGGATTGGATTTGATATTGATTTGTTGAGGCTCAATTATGTTCCAC…
Gma.18102.1.S1_at	CD395085	At5g16270	1e-24	Cell Growth & Division			TTGGCACTTTGGCTGGAATCTGCAGGGTTGGGATAATATTTTCAACATTTTCTCCCCGATTCTAGCTGTGGCTTTTCATTTATAATTTTTTGGAGATAGGATTTAGCTGTTCAGTTTTAGTTCTTCAATGGCCGGGGGGTTGAAGTGGGCACTTGTACCATCCTATTGATTATTCTGGGTCCTAATGTATATATTTTTGTAAAATGTCATAATTTGTAACAGACAGATGCTAATTTGTACTGGTATGTTGTTTAAACGCATCCCTCCATGTAAGAATGTNNTGCTTTCTCTAGGCATCAGATTTATGTAACAGAAAGCACCTTGTAATTTAACTGTTCGGG
GmaAffx.80018.1.S1_at	BF071726	At3g02510	6e-96	Cell Growth & Division			TTGGGCACCCTGCTGAGACCAAGTCTGAGAACAAGACTGAGAACACTCCCAGCCAGGTCAAGGCTCTTTCCAGTGTTAAAATTGTTCAGGCGGCTATTGNGGGGTGGCACTGTTTGGCCGTTGATGATCAGGGCAGAGCTTATGCTTGGGGTGGAAATGAATACGGGCAGTGTGGCGAAGAACCCGAGCGCAAGGATGGCACTGGTAGACCTTTAAGGAGAGATATAGAGATCCCTCAGCGCTGTGCTCCTAAGCTTGTTGTTCGGCAGGTTGCTGCAGGAGGAACTCACTCAGTGGTACTTACACGAGAAGGGCATGTTTGGACATGGGGTCAGCCATGGCCGCCTGGTGACATAAAA
Gma.9509.1.S1_at	BU550018	At5g61960	2e-42	Cell Growth & Division			AGAAGAGTCTGCTAATGGGATAGACTCTTCAAAAATCTCTAACTGATTTAGCCTTCCTTGGGCACTAACTGTTCAACATTGCACCATAATGCCATGTCAACCCCCCAAGTCTGTATGTATATTGACATTTTCTTTTTATGAGAGAAGAGCCAGGAGGAAAAGGGGCTCACAATTTTTTTGCTTATAGAGGAGCCTTAAACACAAGTTTTCTGAGGCTAAGGTACATAACCAGAATGAAGTCACTGATTGTAGTAACTTTTCTTTATTTCCTAAATTTTTGCATGTAGTCCTGCTACCTACCTTCTCACGAGTTTAGAGAATGGATTTAACTGAAGCTCAAAATTTTTGTTAGCTTTGAACAGATGATGTCTCACCATTTGCATTAAATTCCCTTCAGAG…
Gma.11556.1.A1_at	CD401368	At5g08080	3e-08	Cell Growth & Division			TATCATAGTTGTGGGTGTTCTCAAACCTTGGAAGAGTAGCTAGGGTGCTTGAGTGTGGCCCTTTACCTTTTGTCCTTATATAAGAGTTGACTTGGTTGGGAAAGCATATGCAATTATGCATGTGTGTCAAAGGGACATCTTAGAGAAGGATTTTTAAGCTTTTATGTTGTGTGATTGAGATGCTTGTTTTGTGTGGTGTGACT
GmaAffx.20155.1.S1_at	CA819552	At3g11820	2e-15	Cell Growth & Division			TTTGTGGTGCTCTTCACTGTGAAGCCGTGGGAAAATAGCANTANTGGCGGCAATGGGGGTGGTCAGCCTGCACCAGCTCAAACACCTCCATCACCTTCACCTCCTGTTAATGCTTAACCTTGGGGGACTATGAGTCTATATTTCACGAAGCATATTGGTTTCATTTATTTTGATTTGAAGATTGAGCTTTTATATTTTGGGATGCAGCACGGGTGATTGGCTTATGATTTGGTAGGAAATCTGTTGGGTTGACCAGCAGTGTCATTTCAATCCATGGAAAGGTTGGATGATTAATCTGAGTTTGTAATCTGAGGGAAGTGAATGGCTGATTGTTCTGTTGAGGTAGGTTCTTGGAGATCATTATTTTGAGCATCATATTCTTTTTCTGTAAGTAGTTNA…
Gma.4466.1.S1_at	BQ629041	At5g48160	5e-81	Cell Structure			GTCAATCTAATGAGTGCCACCCTTTCAGAACAAACCCATGAGTACTGGTTCAGTGTATGTTATAATCTTTTACATATTATAGCAATGTTATTCTGTTGCACAATTGATGAAGAGTTAGTCTAATTCCATTAGGTTCAAGACAATGTAAGCCTTTTGTAGATCAAAGAGGTACTAGTAAGTAAAGGCTTAACTCAGTTTGAAATTTGGTTTGTTCTATGCGGTAT
Gma.13325.1.S1_at	CD410143	At1g50010	0	Cell Structure			CAAGGATGTGAATGCTGCTGTGGCCACCATCAAGACCAAGAGAACCATCCAGTTTGTGGATTGGTGCCCCACTGGGTTCAAGTGTGGTATAAACTATCAGCCTCCTACTGTTGTTCCTGGAGGTGACCTTGCCAAGGTGCAGAGGGCTGTGTGCATGATTTCGAACTCCACTAGTGTGGCTGAAGTGTTCTCCAGGATTGATCATAAGTTTGACCTCATGTATGCGAAGAGGGCCTTCGTGCACTGGTATGTGGGTGAAGGTATGGAAGAGGGTGAGTTCTCAGAGGCTCGTGAGGACCTTGCTGCTCTTGAGAAGGATTATGAGGAGGTTGGTGCCGAGTCTGGTGATGGAGATGATGATGGTGAAGGAGATGATGATTATTAGAGTGTCTGAAATAT…
GmaAffx.93438.1.S1_x_at	CF809163	At1g50010	5e-71	Cell Structure			CAACACCTTCTTCAGTGAAACTGGGGCNGGAAAGCACGTGCCNCGNGCGATTTTTGTAGATCTNGAGCCNACTGTGATTGATGANGTTAGGACTGGGACATACCGCCAACTATTNCATCCTGAGCAGCTCATTAGNGGAAAGGAGGATGCNGCAAACAACTTTGCCCGTGGCCACTATACCATTGGAAAGGAGATTGTTGANCTTTGCTTGGANCGCATCAGAAAGCTTGCTGACAACTGCACNGGTCTCCAAGGTTTTCTGGTTTTCAATGCTGTG
Gma.13580.2.S1_a_at	AW780839	At5g19780	0	Cell Structure			AGGACTGTTCAGTTTGTTGATTGGTGTCCAACTGGATTCAAGTGTGGTATCAACTACCAGCCACCTTCTGTTGTTCCTGGTGGTGACCTTGCTAAGGTTCAGCGTGCTGTATGCATGATCAGCAACAACACCGCAGTTGCTGAGGTGTTCTCTCGCATTGACCA
Gma.13580.2.S1_x_at	AW780839	At5g19780	0	Cell Structure			AGGACTGTTCAGTTTGTTGATTGGTGTCCAACTGGATTCAAGTGTGGTATCAACTACCAGCCACCTTCTGTTGTTCCTGGTGGTGACCTTGCTAAGGTTCAGCGTGCTGTATGCATGATCAGCAACAACACCGCAGTTGCTGAGGTGTTCTCTCGCATTGACCACAAGTTTGATCTGATGTATGCCAAGAGGGCTTTTGTTCACTGGTATGTTGGTGAGGGTATGGAAGAAGGGGAGTTTTCTGAGGCTCGTGAGGACCTTGCTGCTCTTGAGAAGGACTATGAGGAGGTTGGAGCTGAAGGAGCGGAAGATGATGAGGAAGGAGAGGACTATTGATAATCGAAGGCTTTTTTTTGTTATCAATGTAATTGTTTCCGAGTTAAAAGGGTATATGCT
Gma.17625.1.S1_a_at	BI971077	At4g14960	1e-60	Cell Structure			GTGCCTAAAGATGTTAATGCAGCTGTTGGAATTATCAAGACCAAGCGCACTATTCAATTTGTTGACTGGGCCCCACCGGGTTCAAGTGTGGAATCAATTACCAGCCTCCGACTGTTGTTCCAGGTGGTGATCTTGCCAAGGTTCAGAGGGCCGTGTGCATGATCTCCAATTCCACCAGTGTTGTTGAGGTCTTCTCTCGCATCGACCACAAATTTGACCTCATGTAT
Gma.5666.2.S1_at	BE609637	At1g75780	0	Cell Structure			GTCATCCACATTTATTGGCAACTCAACATCGATTCAAGAGATGTTTAGGAGGGTCAGCGAGCAGTTCACTGCTATGTACCGGCGCAAAGCCTTCTTGCACTGGTACACTGGGGAGGGGATGGACGAGATGGAGTTCACCGAGGCAGAGAGTAATATGAATGATTTGGTAGCAGAGTACCAGCAGTACCAGGATGCAACAGCAGAGGAGGATGAATACGAGGATGACGGTGATGAGCAGCAGTATGATGACCAGTAGCTGGATCAATCTTAGGGCAATGCTCTGATGGTAATTACCAATGGCGTGATGATAACTTCTGGCACCGATCTACTTTTACTGCTATTCGTGTATCTACAGCCATATGAACTCTATTTCATTCCCATTTATCTCTTCTTTTAAAT…
Gma.17868.1.S1_at	BM270176	At5g62700	0	Cell Structure			GAACGATCTCGTGTCGGAGTATCAGCAGTACCAGGATGCCACTGCTGATGAGGATGAGTATGAAGAGGAAGAGGAGGAGGAGGAGTTTGCCCAACATGATATGTGAATTTGAACTTGGGTGTGGTGTANNGNGGTGGCTTTAGACAAGAAGATGGATAACAAGCTGCAACTTCCTGTTGCCGGTTGATGATTGTCTCTTTTGAGGGGATGGTTTTGTTCCGGCTAGATCTAGTTTCTATTACTGTTCTATAAAACTGATTCTGGTTTGTTTCCGTTTTTATGTATAACCTGTTGGTAGGGAAGAC
Gma.2242.1.S1_at	BQ627543	At5g12250	0	Cell Structure			AACGACCTTGTTTCAGAGTACCAGCAGTACCAGGATGCCACTGCCGAGGATGATGGGGAGTATGAGGACGAGGAGGACGATGATGTTGAAGCAGACCACATGTGAAGAGACTGAATGTGAAAGATGCCTGTGTCTTACTTATGCTATGTGATGCGTAAGTGTGTTTGCTCTGCTCTCCAACGTGAAGAAGATTGTAATTACTAATAGTGTATGTACGGTTTGCGGGATAAAACTTTGATGAGCTTGGTGTGGAGAATGGAAAAAATAGGGGGTTAGTGGGAGTGGAGTTTGGGAACAATGTTATGCGGCACCTATCTGTTTGTTCTTATATTGGCTTGCTTTTATGTTGTTATATTGAGTCATGTTTCCGTAATATTTGTTGTTCTTATGCNNGACTTT…
Gma.2190.1.S1_at	CD390492	At3g02230	0	Cell Structure			TCTTTCAAAAGAGTGCACGTCTGTCCAAAAATGTTACATTGAACTCTCCAAGCAAGTCAAGGAGAAGCTTGGGGCTGTTGATCCCTACTTCATCAAGCTAGCAGATGCCATGGTTACTTGGATTGAAGCTTGGGATGAGCTTAACAACAACACATCTGAAGAAGTTCCTTCAAAGCCAACCAATGGTGCTGCTG
Gma.2190.1.S1_x_at	CD390492	At3g02230	0	Cell Structure			GGGAGTGAAGACTGGCCTTCCATACATCTGGCACAGCAAAGCAAGCAACCCTTTTGTCAATCTCAAAAAGGAGTACAAGGGCATCTTCTGGCAAGAAGAAATCATTCCATTCTTCCAAAGTGCCACTCTTTCAAAAGAGTGCACGTCTGTCCAAAAATGTTACATTGAACTCTCCAAGCAAGTCAAGGAGAAGCTTGGGGCTGTTGATCCCTACTTCATCAAGCTAGCAGATGCCATGGTTACTTGGATTGAAGCTTGGGATGAGCTTAACAACAACACATCTGAAGAAGTTCCTTCAAAGCCAACCAATGGTGCTGCTG
Gma.2464.2.S1_at	BM092071	At3g02230	3e-58	Cell Structure			GGCAAAGCATGAATCAGTTTTGGTTAACTGCATAACAACAGCCACAGAACTTGAAGTGGAACTATTTATATACTGTATTTTTTNNCCCTTAGTATTTATTTTCAACTTAACTTTTATTCTTGGCTTGAATTTTGCAGCATTGTTAGCTGTAATTCTATTTAGTAACTTAATGATTTGAGCTTAGAAAGAACAAGTACACCCGTAGGGCGTTACTTTCTTTTTATTACTGTTTAATGGGTAGAGTTCACATGGCAGCATTTCGTTACATGTGAAATAATAGAACGGATAGTGGTGTATGTCTTATTTATTACCGAGTAATCGAGTATAGATCCAT
GmaAffx.88384.1.S1_at	CA802654	At3g02230	3e-28	Cell Structure			GCAACGACATCAACCGCGTTCTTGGCCCCAAGGCACACTGCATCTCCTTCAAAGACTCTGCTTGTCGCTGTTTCGGATTCTTGTTGTCTAAGAAGAAGTACATCTTCACCATTGATGATGACTGCTTCGTGAGTCTCATTCGCCTTAATTGCTTCATCTTTTTTTTTTTTTAACTTTAATTCTTGGGTCTAACTTTTGAACATGACCTGCTTCGTGTGTCGAATTTTCTCTGGTTTTGGCTTCGGTTTTCTTCTATCTGTGTCTAA
GmaAffx.93166.1.S1_s_at	CF805719	At3g02230	1e-127	Cell Structure			TTTTCAACACCCTCTATGAACCTTTCCGAGAAGGTGCAGATTTTGTTCGTGGTTACCCTTTCAGTCTCCGGGAAGGTGTACCAACTGCAGTTTCTCATGGTCTTTGGCTCAACATCCCAGACTACGATGCTCCTACCCAGCTTGTGAAGCCTCTTGAGAGGAACACTAGGTATGTGGATGCTGTTTTGACCATACCAAAGGGCACTTTGTTTCCCATGTGTGGAATGAACTTGGCCTTTGATCGTGATCTCATAGGAGCAGCAATGTACTTTGGTCTCAT
Gma.2464.1.S1_a_at	BG839541	At5g15650	0	Cell Structure			GGAGCATCAGTGGCCAATGGCAAAGCGTGAATCGGTTTTTGGTTAACTGCATAACAGCCACANAACTTGGAANTGGAACTATTTATATACTGTATTTTTTTTCCTTAGTATTTATCTTCAACTTAGCTGTTATTCTCGGCTTAAAATTTGCAGCATTGTTAGCTGTAATTCTGTTTAATAACTTCATCATTTGAGCTTAGAAACAATAAGTACACCCGTAGGGCGTTACTTTCTTTTTATTATTGTTTGATGGGTAGAGATCACATGGCAGCATTTCGTTACATGTGAAATAA
Gma.2464.1.S1_x_at	BG839541	At5g15650	0	Cell Structure			ATGAGCTTAACCCTGCGGGAGCATCAGTGGCCAATGGCAAAGCGTGAATCGGTTTTTGGTTAACTGCATAACAGCCACANAACTTGGAANTGGAACTATTTATATACTGTATTTTTTTTCCTTAGTATTTATCTTCAACTTAGCTGTTATTCTCGGCTTAAAATTTGCAGCATTGTTAGCTGTAATTCTGTTTAATAACTTCATCATTTGAGCTTAGAAACAATAAGTACACCCGTAGGGCGTTACTTTCTTTTTATTATTGTTTGATGGGTAGAGATCACATGGCAGCATTTCGTTACATGTGAA
GmaAffx.90027.1.S1_s_at	CF805750	At1g11580	2e-19	Cell Structure			CAGGCCTAGAAAATCTGTTTCCAAAACTATCTGCTTAATCTTTTCTATAGCTGCTGTCATGATCTCATCAGCCTTTGTTGGTTCTTATCTCATCAAATCCACCTCCTTCTTCAACCAATCCTCTCCTCAACATCTCTGTGATCATGCACTTGATAGGGCAACATGTTTAACCCATGTCTCAGAAGTGGTACAAGGTCCGATCTTGACCCCCACAAAAGACCACAAATTCAATTTGTTACAGTCATTCCTAATGAAATACACCTCACACATTAAGAGAGTTATGAACACAGCCAGTTCTATCAAACTTAGGATCAACAGTCCCAAAGAAGAAGAAGCTTTGCACGATTGTGTGGAGTTGATGGACTTATCTATCAGCAGAGTTAGGGACTCAATGGTGAC…
Gma.3917.1.S1_at	BE658782	At4g19420	1e-158	Cell Structure			GAGAAGTGACTCTCCAGAGCTGAAAAAGACAACAATTGCAAAGGCTGTAGCAGATTGGTTTTATGAAAGAAGGCCTTTCCATCAGATAGATTGCCCTTACCCTTGCAACCCCACTTGTCACAACCGTGTTTTCGATCCACAAGACGACCATCCAGGAGTATAGAAATATTCATTTCATCAAAATCTAGCACACATTTATTTCTATCATTTTTATAAAAACCACACACACTTATTAGTTATTGGTTAGCATGGGATTGAATAAGAAAATATGATCTCCAATTTTATTATTAGGCCACCAAAATTACAAGGAAATGCCGCCACTGCACTAAACTTAATTGTGTGCCGGGCGCACCTCCATCATTGTTTAGTA
Gma.2262.1.S1_at	BE821923	At3g14310	4e-96	Cell Structure			AACACTGGGCCTGGTGCTGGTACTTCTAATAGGGTCACTTGGAAAGGGTATAAGGTCATCACTGATNCTGCNGAGGCCAGGGANTATACTCCTGGAAGCTTCATTGGGGGCTCTAGCTGGTTGGGCTCAACTGGGTTTCCTTTCTCTCTTGGTTTGTAAATTATGTGAAACTTTTGAGTCTTGTAATTGTTACCTATTGTTATTGTTATGTGGCAGAGAGAAACAAATTAAGTTGGCCCAAATGTTTAGAAGAAAACAAAAAAAGGAAAGAGGGAGAGAGAGAGAGATTATTGCTGGAGAGGTGGGTGGGGGGTTTTAGTTTATCTTTCACTTGTATTGGTTGGGTTTTGGAACACACCATGTTCTTCTACCTTAGGCTATTTATTGTGATAGTGCCAT…
Gma.1458.1.S1_at	BI970708	At1g76160	0	Cell Structure			ATTCAGAGCTATCATCTCGATGGCTACTCTTTCTTNGTGGTTGGTATGGATGGAGGACAGTGGACACCTGCTAGCAGGAACACGTACAATCTTCGAGANGCAGTTTCGCGGTNCACAACTCAGGTATATCCCAAGTCATGGACTGCTATATATATTGCGCTTGACAACGTGGGAATGTGGAACTTGAGGTCTGAATTTTGGGCACGGCAATACCTTGGCCAACAGTTTTACATGCGCGTTTATACAACATCGACCTCAATCAGAGATGAATATCCTGTTCCGAAGAATGCACTACTTTGTGGTAGGGCAAGTGGGAGACACACTCGACCCCTTTGAGCTAGCAAGCAAGCGCCTTCGAGTATGAAAACTAAAGCAGTTAACTTATCTGCTTCTGATTTT…
Gma.9866.1.S1_at	AI443349	At1g76160	4e-83	Cell Structure			TCAGTCATGGGTGCCGACTTTCGAGCCTTCGTCGAGGTCGTGTTTCAGAACCATGAAAACATCATCCAGAGCTGGCACATTGATGGGTACTCATTTTGGGTTGTAGGAATGGACGGTGGTGTGTGGACGCCTAATAGTCGTAACCAATACAACCTCAGAGATGCAGTATCGAGGAGCACAACACAGGTATATCCTAAGTCATGGACCGCAATTTACATGGCATTAGATAATGTGGGTATGTGGAACATGAGGAGTGAATTTTGGGCACGCCAATACCTTGGACAACAATTCTATTTGAGAGTGTATTCACCAGTTGGATCCATTAGGGATGAATATCCAATTCCNAAGAATGCTCTTCTTTGTGGCAAAGCTGCAGGCAGGACAACCAGGTGATCTCTA…
Gma.10779.1.S1_a_at	AW309422	At5g66920	0	Cell Structure			GGTTATGATTTTTGGGTCATTGGTCATGGTTTCGGCCAGTGGACAGATGCCAGCAGGNAAAACATATAATCTAGTGGATGCCCTGACTAGACACACTACACAGGTGTATCCAAAATCCTGGACTACTATATTGGTGTCTTTGGATAACCAAGGCATGTGGAACTTGAGG
Gma.6199.1.S1_at	BQ612015	At5g66920	0	Cell Structure			TTGACGGTTATGACTTTTGGGTCGTGGGTTATGGTTTTGGTCAGTGGACACCAGCCAAAAGAAGAACCTATAATCTAGTTGATGCTCTGACCAGGCACACTACACAGGTATACCCAAATGCTTGGACTACAATATTGGTGTCCTTGGACAATCAAGGTATGTGGAATCTGAGGTCTGCAATATGGGAAAGGCAGTATCTTGGGCAACAATTATATCTCAGGGTTTGGACTTCTGAGCGCAGCCTTGCTAATGAATATGATATTCCCAACAATGCATTGCTTTGTGGCAAAGCTGTTGGACATAACAACCCCTAGTATCACTATCAACACCAACTAATCATATTGTGCCGTTTTCTAGTCATGAGGGTTTGACTAAAATTGGAAGAGTTGGAGAGAATTT…
GmaAffx.9520.1.A1_at	BI970995	At3g19960	3e-12	Cell Structure			GCGAAGATGGCGCACTTGAGAAAATGAAGAAAAAGTGGTGGGGAAGAAGGAACAGTACAAGGATAAATTGATTTTTTTTCAAAATTTTTAATTTATCTTTTATTTTTTTGAGTTCGGTTTTGGTCTATGCACTGTTTCAAGAGCATTGCCAACTATATATATCCGAAAGTGAGGAAAATACAATAGGAAAGGTAAAAAAAAAAAAAGGAGTGGTAGGAAGAGTCCAAGGATGAGTGAATTTAGTGTAGTTTGGGTTNGTTGTTGCTANCCACCTTTCTTTAATTAGTAATTTCTGCATGAATTGTTGAGTAAGATGTATACTACAAACCTTAGTGATTCGTGTATATCGCTGATGCCCATGCCTTTTCTGGTATGTGGATTGCATGTCAAATTTGTTGT…
Gma.7351.1.S1_at	BU082673	At4g31340	2e-51	Cell Structure			GCTAGAGTGTTTTCAGCTGTTTTCTGTAGCAAAAAAGTGANTAAACCTGCTCGAAATGGAAACANTCACCATGCACGACGTAAACNTAAGCGAGGGCATCTAGACAAGCACACAACATGAAGTTGGTTCCTGCTTTATTTTTTTTCNTGGAAAGANNTTAGATAATTTTTCCTGTTCGCANGNGCTTATTGAGGGGNATNTATCTTTCCTGTCGTGTGGGGTTTNGAATATTTTACTTCTCTTTTTTTGGGTGAGGTAACTTTAGGATGTTTCACTGTAGAAAAGGGCACACANTATGTTTAGNTGTTNATGTATTATCANNNNNNNNCTNNGTTATATTTNNTTANNANNCCTTGCACTCCCTTTTCNCTGNTGGTTTTATTTTCTTAAATTCTTGAC…
Gma.17926.1.S1_a_at	CD401821	At3g62830	0	Cell Structure			GACCCTGATGCTAGGATAGAGTACAGGCCCAACACAGAGGATGACCCGCACAAGAGAAAGCCTGATATAAGTAGGGCTAAGGATCAACTTGGCTGGGAACCCAAGGTTGACCTGCGCAAGGGCCTCCCACTAATGGTTTCTGACTTCCGGCAACGCATTTTTGGTGACCAGAAGGAAAAGGCATCCGTAGCCTAATTCTAGCATGTCATGTATCTTAGAGCCAGAAAGAGAAAAAATAATAGTTCGAGGATAACCCTGGCCCG
GmaAffx.74332.1.S1_at	AW348552	At4g10840	2e-61	Cell Structure			GAATTCTTGAACAGGAGTGTGGCCCNTGTCATCAGGATACTCTTGGGGTGTACAGCAANCTTGCAGCTACATATGATGCTATGGGAAGAGTGGGAGATGCGATTGAAATCTTAGAATATGTTCTCAAGCTGAGGGAGGAAAAGCTTGGGATAGCAAATCCTGATTTTGAAGATGAGAAGCGTCGTCTGGCNGAGCTTCTGAAAGAAGCAGGCAAGACACGGGACAGAAAAGCAAAATCTCTGGAAAACCTTATTGATCCTGGCTCAAAGCGGACGAAGAAGGAGGGGGCAAAGAGGTGGCCTGGTTTGGGGTTTAGAATTTAACCATAGTTTTATTCATTTAAATATATATATTGAATGCACATTCTGTAACATAGGATATCTTGTATAGGGTTGAATA…
Gma.7439.1.S1_at	BU547716	At3g16630	2e-40	Cell Structure			GCAGAGCACCGGGAATTATAACAATATCACCACTGGATCCAGGNTTAATGAAACAGAATCCTCTCCTGATGGGAATGTCAGTGCAGTACTTGAGGAGGANGAAGCNCTNATNGCNGCTCATAGGAAAGAAATTGAAGATACAATGGAGATTGTTCGTGAAGAAATGAAACTCTTGGCAGANGTGGANCAACCGGGAAGCCTTATTGACAACTATGTAACCAAATTGANCTTTGTGCTNTCTCGCAAAGCAGCNAGTCTCGTGGGTCTTCAAGCTCGTCTTGCAAGATTCCAACATCGNCTAAAAGAGCAAGAAATTCTAAGTAGAAAAAGAGTTCCCCGTCAATAAGNGACTCGGTTTCTCTTATNNNNNNNNNNCTGTATTCTCGTGTTTNTTAGCAA…
GmaAffx.42428.1.S1_at	BE821424	At5g27950	2e-35	Cell Structure			GATCAATTGCCTCTAAAAGTTCCATCAATTTTTCATATTCCCAATCATTGAGTTATTCAGATNTCCGCATCAAAGCAATACTGCGAAGTTCAAATGGAAAATCTCGGTACGCTGAAGCAGATAGTGTTCCAATTCCAAAGACTGTTCTCACNGAAAAGCCTAAATGCAACAATGATTTGGAACCAAAAGTCACAACTCCTCGAAGCAAGATGGTTACATCATCAGACCAAAACTTTAGAGTTTCATTGGGTCGTCACAGAAGAAGGATGTCTGATTTGATCTAAAGGTTCAAAAGNCATCTTGGTTGCAGATTTTTTAATGTGGTGAAGGGATTGCATGTTTAACTTTTTGCAGTTTATATTTGTCTGTAACAAATAGTAGCGAGTGGTATATGAATAG…
Gma.4424.1.S1_at	BG237912	At1g11840	1e-130	Cell Structure			TGATAAGCCTGAGTACAAGTACACTATAGCTATGCTCGGGTATGGAGAGGAGCACGAGACAACTGTGTTGGAGTTGACATATAACTATGGTGTGACTGAATACTCTAAGGGAAATGCTTATGCACAGATTGCCATTGGTACTGATGATGTATATAAGAGTGCTGAGGTAGTTAACCAAGTCATAAAAGAGGTTGGAGGGAAGATTACTCGGCAACCAGGGCCAATTCCTGGCCTTAATACAAAAACCACTTCGTTTTTAGATCCAGATGGATGGAAAACTGTCTTGGTTGACAACGTTGATTTCTTGGAAGAAC
GmaAffx.6824.2.S1_at	BQ094655	At1g14890	2e-50	Cell Structure			GGGAATGCCTTGATTTTCAACCACGTGTCAGATTACTTACCGTCCGATTTTATACATCTCCAAACTCGAAAAAAAAAAAAAAGTAGTTAAAGAATAGGTTGTGTTAAATTTGGCGTTNAAAAACAAAAAGTGCCGTGTGTGTGGGACGCGTGAGCCCTTCTTTCTTGTGTTGTAAATTTTGGTATGCTTGTAGACATATTTGCTGTCACTCGCTCAAGAAAGTAGAGAAACGCATCACTTCAATCACGTGATAGAATGAATGAAGAGTGTAGATAACTATATGGGGGGAAGAAGAAAAAACAAGTGAAAGTTGAGTGTGGAACTTTGACTTGTTACTTT
GmaAffx.29260.1.S1_at	BI471456	At4g12390	1e-49	Cell Structure			TATGCGTCAAGTCTCTGTTGGCCTACGCAAGCGTGATTCGCCGAAGCGACCGACAACTAGCCACGACCGCTCTGTCGGTAAGCATATCGAGGAGCCGATCCTCCGCATGGTTGGTGAAGAAGATGTTGAAAGCGAGAGGCATGAAGCCTAGAGAATACAGAGCGGTGCAAGACTGCGTGGAGAACATTGGTGACAGCGTGGACCGTCTCAGGCAATCGGTTACGGAGTTGGGGCGGACGGGCGAGGACTTCGTCTGGCACATGAGCAACGTCCAGACTTGGGTCAGCGCTGCCCTCACCGACGACAGCACTTGTCTTGACGGCTTCGCTGGTTCCGCCATGAACGGAAACGTGAAGGCTCTTATAANNGACAGGATTGTCCACGTTGCTCAAGTCACAA…
Gma.5793.2.S1_x_at	CD393846	At1g06760	2e-13	Cell Structure	Histone		ACCGACTAAGTCTGCTCCTGTTAAAGCCGCTGCTGCTCCCAAGAAGCCCACCAAAGCTGCGGCTAAGCCCGCCGCCAAGCCCGCTTCCAAGCCCAAAGCTGCTGCACCTAAGAAGAAGGCTGTTGCCAAGCCCAAGGCCAAAGCTGCGGCCACCAAGCCCAAGGCCAAGCCCGCTAAGGCCGCGCCGAAGAAGGTCGCCGCTAAGCCTGCGAAGAAGACTCCCGTAAAGGCCGTGAAGAAGCCCAAGAGCGTCGTGAAGAAACCTAAAAGCGTGAAATCTCCAGCGAAAAAGGCCAAGGCTAAGAAGTGAGGGATTGGAGTGGGTTTTAGTTTGGCGTTATAGTGTTTATGTATTTCGGGTTGAATCGTAGTATAGGT
Gma.15878.1.S1_at	CD393373	At2g30620	5e-15	Cell Structure	Histone		AACAAAGGCTGTTCCTGCCAAGCCCGCGGCAAAGCCCAAAGCCAAGCCCGTCAAGGCTTCAAGGACGTCGACGAGGACTTCACCAGGGAAGAAAGCAGCTCCTGCTGCTAAGCCCGCGGCGAAGAAAGTTGCGGTGGCAGCGAAGAAAACGCCAGTGAAGAGTGTGAAACCGAAGAGTGTAAAGTCTCCGGCCAAAAAGGCTACGGCCAAGAGAGGGGGTAGGAAGTGAGAAAGAGTGGTCGGTGGGGTAGGGTTGTTTTGGGGTTGGTGTTGTGAAGTTCTTTGTCCTCTTGGTGTAGTTGGGGGTTACAGATGATGTTCCTATAACAGATGAAATCTGATTTTATGAAACCTTTGTTATTTCCCTTTTTAGTTTTGATTTTTTTTTGGTTCGACCTA…
Gma.5449.1.S1_at	BG511648	At2g30620	1e-16	Cell Structure	Histone		CAGCGAAGAAAGTAGCGCCTGCTAAGAAAGCGCCAGTGAAGAGTGTGAAACCAAAGAGTGTAAAGTCTCCAGCGAAAAAGGCTACGGCTAAGAGAGGGGGTAGGAAGTGAGAATGTGGTGGGTAGAGTGGTTTTAGGGTTAGTTTTGTGAAGTTCTTTGTCCTCTTGGTGGTGTAGTTGGGGTTACAGATGATCCTATAATATATGAAATCTGATTTTATGAAACCTTTGTTTTTTTTTTCTTTTATTTAGTTTGAATTTTTTCTTTGGTTCGACCTTAGGGAGTAGATTAAAAAAAGCTTCTAGCTCTGCTTTTCAGCTAAATGAGTTAATCATAAAATGTATCTTATAGAGTATGAGGTTTCTCTGCGTTATAGTACCTTTGATGGATCAATGTAGT…
Gma.5833.3.S1_at	BI469020	At2g18050	5e-26	Cell Structure	Histone		TGAAGGAGAGCACCGCCAAAGCGACGAAGGAATCGCGTCCGAAACGAAACAAAATCGCAACCGCCGTTGCTCCGAAGAAAACCGAGGCGGTTAAAAAGCCCGCGAAGAAGGTCGGGCCGAAGAAAACGAAGAAAGTGTCGACGCCTGCGNNNCCCAAGCAGCCCAGGTCCATTAGGTCTCCGACCAAGAGGGCCCGTAAAGCTGCCGTCGCTGCGGCTTGATGTTTGATGTTTTTCTTGTTTAGTTAAAACTCTGGCATATAATATATGTAGATATGAAAAGGTGTGTGTTANCCTTGTTGCACAATCTTGAATATAGTTGTGTGGTTTAGGATCGTAGATAGTTTAGTGTTCTGCAATGTTCGCTCTAAGAAGTGATCAATTGGAGATGAATTTTACT…
GmaAffx.88705.1.S1_s_at	CK606623	At2g18050	2e-24	Cell Structure	Histone		TGTGCCTTGCTGCACAATCTTGAAGAAAGTTGTGTAGTGTAGGATGGTAGATAGTTTAGT
Gma.15648.1.S1_s_at	CD404676	At5g54640	4e-42	Cell Structure	Histone		TGTCCTCGAATATCTCGCAGCCGAGGTTTTGGAGTTGGCTGGAAACGCTGCGAGAGACAATAAGAAGACTCGAATTGTGCCGCGCCACATTCAATTGGCGGTGAGGAACGACGAAGAATTGAGCAAGCTTCTTGGTGACGTCACCATCGCTAACGGTGGCGTTATGCCCAACATTCACAATCTTCTCCTTCCCAAGAAGGCCGGTGGCTCATCCAAGGGCGCTGCTGCTGACGATGACTCTTAAATAGGGATTCGCTTTTCTTGATTTTTTTATTATCAAATTTAGATTATCTTTTGGCCTCTCTGT
Gma.17619.1.S1_at	CD405083	At5g54640	3e-42	Cell Structure	Histone		CCGTCGGTCGTATCGCCAGGTTCCTCAAGGCCGGAAAGTACGCCGAGCGCGTCGGCGCCGGAGCCCCCGTCTACCTCGCCGCCGTTCTCGAATATCTCGCTGCTGAGGTTTTGGAATTGGCTGGAAACGCTGCGAGAGATAACAAGAAGACTCGAATTGTTCCACGCCACATCCAATTGGCGGTGAGGAACGACGAAGAGTTGAGCAAGCTTCTAGGAGATGTTACCATTGCTAACGGCGGTGTTATGCCTAACATTCACAACCTTCTTCTTCCCAAGAAGGCTGGGGGCTCATCCAAGGGTGCNGCTGCTGACGATGACTCTTAAATAGGGATTCACTGTTCACAAAGTTCTTGAATTTAGATTCTATGTTTGCTCTNCTTTTTTTTTTCCTTTTTAT…
Gma.5443.2.S1_a_at	BM891269	At5g54640	5e-14	Cell Structure	Histone		TCAAAACACTTCAAACATCTCGAACGCTCTCTTTCCG
Gma.10687.1.S1_at	CD415391	At1g54690	2e-50	Cell Structure	Histone		TCCAAATCCGTTTCAAGATCGCAGAAAGCTGGTCTCCAATTCCCCGTTGGAAGAATCGCTCGATTCCTTAAGGCTGGGAAATACGCCGAGCGTGTTGGTGCTGGTGCTCCTGTGTACCTCTCTGCAGTGCTCGAATATCTCGCTGCTGAGGTTTTGGAATTGGCTGGGAATGCTGCTAGGGATAACAAGAAGAATCGTATTGTTCCTAGGCACATTCAGCTTGCTGTGAGGAACGATGAGGAACTGAGCAAGCTTTTGGGGTCTGTTACCATTGCCAACGGAGGTGTCTTGCCGAACATTCACCAGACTCTGCTTCCCAAGAAGGCTGGAAAGGGGAAGGGCGAAATTGGATCTGCCTCTCAAGAGTTTTAGGGTTTTTGTTTTACCCATTTGGACTAT…
Gma.16073.1.S1_at	CD395530	At1g54690	4e-43	Cell Structure	Histone		GGTTCCCCTGTTTACCTATCTGCGGTTCTCGAATACCTTGCCGCTGAGGTTTTGGAGCTTGCCGGCAACGCTGCGAGGGACAACAAGAAGACGAGGATCGTTCCNAGGCACATTCAACTTGCGGTGAGGAACGANGAGGAGTTGAGCAAGCTGATGGGGTCTGTGACCATTGCCAATGGTGGTGTTCTGCCTAACATTCACCAGAATTTGTTGCCCAAGAAGGCCGCTGGCAAGGGAAAGCCCGAGATTGGATCTGCCAGTCAGGAGTTTTAGATTCTTAGGGTTTCATCTTGTTAGTATTTAGAGTGCNAAATTGAAAGAAAATGGAACTAGTTTTGGTATGTAGTTGGCCGCGTAGTACAGTGAGACTAGGATTGACATTGAATGATGTATAGTCAT…
GmaAffx.70462.1.A1_at	CD391648	At1g54690	7e-29	Cell Structure	Histone		CTTGCCGAATATTCATCAGACTCTACTTCCCAAGAAGGTTGGCAAGGGGAAGGGCGAAATTGGATCAGCTTCTCAAGAGTTTTAGGTTTTTNGTTAGGCCTATTTGGACTATAGTTTTTATTTTATTGCGGTTGTAATATACATGTTTTGGTTAATTTTTAGATATCTGCTCTGAGGAATTAAGTGTTTCTCAGTCTTTTGAACTGGATGATTAATCTCGCTTTG
Gma.10707.1.S1_x_at	BI967315	At5g02560	1e-40	Cell Structure	Histone		GAAGCCGGTTTCAAGGTCCGTCAAGGCCGGTCTCCAATTCCCCGTCGGAAGAATTGGCCGTTATTTGAAGAAAGGAAGGTACGCCCAGCGTGTCGGTACCGGTGCTCCCGTTTACTTGGCCGCAGTTCTCGAGTACCTAGCTGCTGAGGTGCTTGAGTTGGCTGGGAATGCTGCACGTGACAACAAGAAGAACAGGATTATTCCGAGACATGTGCTNTTGGCTGTNAGGAACGATGAGGAGTTGGGGAAATTGCTTGCTGGTGTCACCATTGCNCATGGTGGTGTNCTTCCAAACATTAACCCTGTTTTGNTNCCTAAGAAGACNNAGAGGGCTGCCAAGGAGCCTAAGTCTCCATCCAAGGCTACTAAATCTCCTAAGAAGGCCTAGATTATCCTTTT…
Gma.10707.3.A1_a_at	AW350624	At5g02560	9e-21	Cell Structure	Histone		CGTATACTTGGCTGCAGTTCTCGAATACCTAGCTGCCGAGGTGCTTGAGTTGGCTGGGAATGCAGCACGTGACAACAAGAAGAACAGGATTATTCCAAGACACGTGCTTTTGGCAGTGAGGAACGATGAGGAGTTGGGGAAATTGCTTGCTGGAGTGACAATTGCACATGGTGGCGTGCTTCC
Gma.10707.5.S1_x_at	CD398411	At5g02560	1e-40	Cell Structure	Histone		CAGCGTGTCGGTACCGGTGCTCCCGTATACTTGGCTGCAGTTCTCGAATACCTAGCTGCCGAGGTGCTTGAGTTGGCTGGGAATGCCGCACGTGACAACAAGAAGAACAGGATTATTCCAAGACACGTGCTTTTGGCAGTGAGGAACGATGANGAGTTGGGGAAATTGCTTGCTGGAGTGACAATTGCACATGGTGGCGTGCTTCCAAACATNAACCCTGTTTTGTTGCCTAAGAAGACNGAGAGGGCTTCCAAGGAACCTAAATCTCCATCCAAGGCTACCNAATCTCCTAAGAAAGCTTAAGTGTTTTTATTTTATTTTATTTGAATATGTAAATCAGTCTTTAGATGCTTTTTATGTGAAAGAAAAAATTATCTATTGCNAACACTGTAATTCCTA…
Gma.3316.1.A1_s_at	CD409980	At3g54560	2e-46	Cell Structure	Histone		GGCGACTGCTGCTGTGTACTTGGCCTCCATTCTGGAATATCTGACTGCTGAGGTGCTGGAGCTGGCNGGGAATGCTAGCAAAGATCTNAAGGTGAAGAGGATCACACCAAGGCACTTGCAACTNGCTATCAGGGGAGANGAAGANCTTGANACCCTCATCAAAGGGACCATTGCTGGNGGTGGTGTNATCCCTCACATTCACAAGTCNTTGATCAACAAAGCNGCCAAAGAATGAAAATCAAANGCCTCTTTGNTTCTCCTATTATGTGTTNCTTTATGTTTATGTAGNNNTAGTNAGTGTAGTAGGCCTTNNNTACTGTTTANGAACAGATGTTNATGTTATTGTGTAAATGGTCATTCTATTGGCTTTTAACTTGCCTGTTGTGATA
Gma.775.1.S1_s_at	CD402282	At3g54560	6e-52	Cell Structure	Histone		TGGCCTTCTGAATTCATGTTGCCCTTTACTGAAAACTAAGTTTGTGGTTATTGTGAATTGATCACAGCAGTAGGCTAGTACGAGGATTTGTTTTAACAGTTTTAGAACTCAGGTGGTAGTGTGTAAATGGCTTGCTTGCTAGACAATGCTTTCTTTAACTGTTTTAGTTGGTCTGTTTTTAGAGCTTTAACCATGTTGGATTGCTA
Gma.1975.1.S1_a_at	CD418592	At1g07790	2e-46	Cell Structure	Histone		CACCCTGACATTGGTATCTCAAGCAAGGCCATGGGAATCATGAACAGCTTCATCAACGACATCTTCGAGAAGCTTGCCCAGGAATCTTCTAGACTTGCCCG
Gma.1975.3.S1_at	CD393546	At1g07790	2e-46	Cell Structure	Histone		TCACTAGCTCTTGAATTAGCTATCTTATCGCTTTCCAAAGACTCTTTTCTGTCCCAATTTGAGATTTTAATCAGTAGTAGACTTTTTTTTTTNGTTTGATAGGATTTGTAATTGAAAGAATGGTCCTGGGTTGATCCTTTTGTGTATTGAAGTGGCAAGATGTATNNNATTATATAGGAACGCAGTATTGTTTAGTATTATACTTTCAAGAATCTCCAATCGGCCATTCGTTAATAATTGTTTTTTCGGATATTTGTTTGCTTGAACTTTCCAGNNANNNANNAATAGTGTGCAAATCTTTTGAAAACTGTNNACNTTTATCGTATAGGAATCATTTTCCCTAA
Gma.2623.1.S1_at	CD414993	At1g07790	1e-41	Cell Structure	Histone		TTCACCCCGACATCGGAATCTCAAGCAAGGCCATGGGGATCATGAACAGTTTCATAAACGACATCTTCGAGAAGCTCGCCCAGGAGTCGTCGCGATTGGCTAGGTATAACAAGAAGCCTACCATTACTTCCAGGGAGATCCAAACGGCGGTGCGTTTGGTCCTCCCTGGGGAGTTGGCCAAACACGCTGTCTCTGAAGGTACCAAGGCCGTCACCAAGTTCACCAGCTCTTGATTNGTTTTGTTTCCTGTGTTTCGATTAGGGTTTTCTGTTGACCCCGATTTGATTCGCATTTTTAAATTAGGGTTTTATTTTCCTTTTTGTTGCTTTTGAGGGTGTAGAT
Gma.11213.1.S1_x_at	CD394730	At5g10980	4e-71	Cell Structure	Histone		TGGAGTCAAGAAGCCTCATCGCTATCGCCCTGGAACTGTTGCTCTTCGTGAGATCCGAAAATACCAAAAGAGCACAGAGCTTCTGATCCGCAAGCTCCCCTTCCAGCGTCTTGTTCGTGAAATTGCGCAAGACTTCAAGACCGATTTGAGGTTCCAGAGTCACGCTGTTCTTGCGCTTCAGGAAGCTGCGGAGGCTTACTTGGTGGGTTTGTTTGAGGACACCAACTTGTGTGCGATTCACGCCAAGAGGGTGACCATCATGCCAA
Gma.11213.2.S1_at	BQ298544	At5g10980	1e-71	Cell Structure	Histone		GGCTGCAAGAAAATCTGCACCTACCACCGGTGGAGTCAAGAAGCCTCATCGCTATCGTCCTGGAACTGTTGCTCTTCGTGAGATCCGAAAATACCAAAAGAGCACAGAGCTTCTGATCCGCAAGCTCCCCTTTCAGCGTCTTGTTCGTGAAATCGCGCAAGACTTCAAGACTGATTTGAGGTTCCAGAGTCACGCGGTTCTTGCGCTTCAGGAAGCTGCGGAGGCTTACTTGGTGGGTTTGTTTGAAGACACCAACCTTTGTGCGATCCACGCCAAGAGAGTGACCATCATGCCCAAGGACATTCAACTCGCACGCCGCATCCGTGGAGAACGTGCTTAGGCTTATAATAATGATAATAGCATAGTTGTCGCCTTTTCGTTTTGCAATACATTTCTTGT…
GmaAffx.91053.1.S1_at	CF806778	At5g10980	5e-40	Cell Structure	Histone		TCCCGAGTAAGAACGAGGCAACCCAACAAACTAACTTAAACGAGATTAGATGGCAACTGAATGTTGTCCAATACAGTTTCTAAAGTGGCTGCAACATCCCGCAGGTAAAAACTAAAACAGAAGCATTCTAACACATACATATGTCCAAAAATCAATTACAAGCCAATTTTCTTAAAGGAAGAAAACACAGTCACGGACACTCGGCAGTATTTGCCTATATCCCAATTAATGCTACTACCAGCAGAAAACCTACCCTCCCTAACAACCCCATCTATTGAATAAAAAAAGGAATCTGAAAAACAAAAACACCAACCGCAGCCACCAATCATCTTCATCTTTCCAACCACCAACTCAAGCACGCTCACCACGAATCCTTCTTGCCAGCTGAATATCCTTGGG…
Gma.11176.1.A1_at	CD392100	At5g65360	3e-65	Cell Structure	Histone		CCCACCCAATTCAGTTTTCTCAAATGGCTCGTACGAAGCAAACGGCTCGCAAGTCCACCGGCGGCAAGGCGCCACGTAAGCAGCTGGCCACCAAGGCGGCTCGTAAGTCTGCTCCGGCTACCGGCGGCGTGAAGAAGCCGCACAGATTCCGTCCGGGAACCGTAGCGCTCCGCGAGATCCGGAAGTACCAGAAGAGCACGGAACTTCTGATCCGGAAGCTCCCGTTCCAGCGATTGGTNCGNGAGATCGCGCAGGACTTCAAGACCGACCTTCGATTTCAGAGCTCCGCCGTCTCCGCCCTCCAGGAAGCCGCCGAGGCCTACTTGGTTGGTCTCTTCGAAGACACCAATCTCTGCGCTATTCACGCCAAGCGTGTCACTATCATGCCCAAGGATATTC…
Gma.5949.1.A1_at	CD412339	At5g65360	5e-65	Cell Structure	Histone		CTTGGTAGGGTTGTTTGAGGACACTAATCTCTGTGCCATTCACGCCAAGCGCGTCACCATCATGCCGAAGGATATTCAGCTTGCGCGGAGAATTAGAGGCGAGAGGGCTTGAGGATTTTTTAATGATTTGTCACTGCTAGGATACGTTAAAACTGGATCTGGTTTATGTAGTTTGTGGTTTTGGTGTATTTATTCGACCGTAAGGGTTGTGGTTGTTAGTATGAAGATGNAGAGTTAACATTATCTGGCTAATTAGTTGGTTAATGTTTACTTTGAATTTGCTG
GmaAffx.9561.1.S1_x_at	BI974310	At5g65360	0.0005	Cell Structure	Histone		CAAACCGCTCGTAAGTCCACAGGAGGAAAGGCTCCTAGG
Gma.2798.1.S1_at	CD417686	At5g59970	5e-35	Cell Structure			CACCGTAAGGTGTTGCGCGATAACATTCAGGGAATCACCAAGCCTGCGATTCGGCGTTTGGCTCGCAGGGGTGGTGTGAAGCGTATCAGTGGTCTCATCTACGAGGAGACACGTGGCGTGCTCAAGATCTTTCTGGAGAACGTGATTCGTGACGCCGTTACCTACACTGAGCACGCTAGGAGAAAGACCGTTACGGCAATGGATGTGGTTTATGCTCTCAAGAGNNCAAGGAAGAACCCTCTACGGATTTGGAGGCTAGTTTNNNNNNNNNNNNNNTTTTTTTNAATTTTTATTGTTAGGTTTCGTTTGTTTTGGAGGTTTATGTGGGATGTAAGAGACCCTTGCTATTAGGGAGATAGGGAAAAAAATTGCAAGGATTTGGTGTAGTAAGTTGCTGGT…
Gma.4491.1.S1_at	BI967493	At2g20520	1e-56	Cell Structure			GGTGCTGTTGCCGTTGGAGCTCTTTGGAACCACCAAGACCACTCATTCTTCTGAGGCTCCTTCTCCTAAGGGTTCTAAGAGTACTCCTGAGATTCCCAGCGTGGGTAAGGCTGGTGGCGCTCCTTCTCCTCATGGTGATAAGAAGGATACTAATGCTGCCAATGGGAGGAATGTGGCTTTTGGACTTGTCGTTGGACTTGCCTTGATTTGCATAGAAGCTCTCCATTGATCATCAGATAACTTGTGTCTCGTGTTTTTCATCTTTTTCTTTTACTCTCCATCACTTCATTTGT
Gma.17982.1.S1_at	AW185083	At5g07720	1e-108	Cell Structure			CTCAGTAGCATGGAGAGGGCTTTCAATTTTGCTGATAATCAGGTGCTCAAGCTCTATGGGTTCAGGCACCGTGGTCTCTTGAGTCCTAAGATCAAGAGGATCAGAAATGAGACAGTTAGTCCTTTGGAGTTTGTAGACCAGTTTGATATTCGAAGACATTCTACAGAAAACACGNNNANCAAAGAGCTAGTGAGAAAGTTGTTGTTCAATGGGTGGTATTATAGAGAGTAATTATTTAGAAGTGGAGTTTCATTTGGGGACAGTTCACATGTAACTTTTGCTTCTTCTGTCGTCTTGGTACTTCTGTGAGAATTTTAGGATAGAATTCTTTCGTAAGTTCTTCTTTCTTCCAGATTTGAGCAATCAGCAAACAAATTTTATTTACTCATCTACTGTATA…
Gma.17861.1.S1_at	AW310110	At1g09560	3e-84	Cell Structure			ACACAGTCCATTGCTCTAACGTTGTTTGCAGCGACGCCACCGGTTCCAGACAATGTGTTAACCAAGGCGTTCCAGGTGGGTACCAAGGAGGTTGAGAAAATTAAGTCTAGGCTTGCTCCTAAGAAATAATTAATACTAATGTGGGATGTGGTTGTAATGTCTCTCTCATTGTTCTTACTTCTTACACCTTCCTCTCTTGTCCTTGTTCTTGTTGCTTTACAATTCATGTTTGTTGGGAACTCATAAATTCAAAGATTTGGAATGAGAGTANAAAANNNANNANANNCATTTCTTTGATGATTGGAATTTGAAATTAGATGCTTGCTTCCTTGCATGCTTCTTCGTTTTGTTAATTAAATGCGCTATTAGTGGTTCTGTCCTGTGTTGACTTCTTAA
GmaAffx.87008.1.S1_at	BE804610	At3g16850	1e-128	Cell Structure			GAATAGTTGATTCGCCTTTCACTCCTATCTGTCTTTNNAACGNGACNTTTTCTNCCAGTTCNGAGTCATCNNNTCCTTCATGGTTTTGTTCTNACNTAATGGGAATCTCCNAGGANGTGTTTCCTGAGCCATGTCCTGATCTGCAGAACACGTATTCAAACTTTTCCTCTTGCTTTTCTTCCCTACATCCGTCGTCTAGTTNTGTCTCAAGCGCATGAGATNGCCATCTCTAAGNATCTAGTCATTNCTTTGATTCAACCTGTACATGAGACACAAAATTCATATTCCATCAGGAACTTCATTACAATTTTCCAATAAAAGGAAATTCTTGATGTAAAGATGTTCTTTCTCTTCAACATTTCAATGAACCTTCCTCTTGTCTGTGCATGAAAAGTCCGT…
GmaAffx.17518.1.S1_at	AW598055	At3g62110	2e-07	Cell Structure			GGATATTCTGACTTAGTCCAGCCAGAAGCTTGTGAGCCTCTCAAGGAGAGAATATTCCCTGATCATTGTTCAGATTGTTACTATTTGACAAATCAAATTCAGAGTTCNAATAGTCAAANTNNAGCAGGACAAACTTCAGGTGACATAAGAGGTTGAGTGGAGTTGCCCNNNNNNNNNNNNNCATCTGCAGAAAGANACCGAGAAATGATTGNTTTTTGTAACTTGTGTGCAGTAACAAAATAATTGAGTGATTTATCAGAAATAGGAAGTTGGATGATTTCATGTCTTGCTTTTTCTAGCTANATATGGCTTTGGAAANGAAAATTGCAAAGTTNNGTGTTTCTNNTGATTCTAAGGGAAAGANTGNGTTTGGCTNTTGATAGAGGTGAGATATGGCTA…
Gma.15979.1.A1_at	CD414564	At4g23500	1e-14	Cell Structure			AAGAAGCAGCCTTGGACCTGCACTGATATTGAAGGGATGACGAGTGGGGTGACCCCTCCACCTTGTGGTCTGTTACCTGATCAAGGGCCGGAGAAGATCACNNNNNNNGATTTCCCAGCAGATAATCTACCTATTGACATAGTGGAGCTTAAGAAATGTACTACCACCATGACATATGTTGAAGTGTAGTAGTTTATGCAAGTTATTGTTTTAGGAATAGTCCTTCTCAGATTATCAAAAAAACATTTCTCAAGTTAAGAAATGAATGGTGTTTCAAATTATAGANATGGAACGGTTGTCTTTTCTTCTCTCGTTTANNNAANNNNNNNNNNNNNTGCTGCTACAAGTTTCATAGCTAAT
Gma.6302.1.S1_at	BI786195	At2g44450	1e-142	Cell Structure			GATCCAACCCTTTCCGTGGAAGAAGCTCTCATGGATATTTATCGAATTGATTATTATTATCGTCATTTCTTTTATCTTCGATCAGCAATTAAGGCTGGCGCAAACGTTAAGGGATTTTTTGCATGGTCATTTTTGGACTGTAATGAATGGTTTGCAGGGTTCACTGTTCGGTTTGGATTAAACTTTGTAGATTACAAAGATGGCTTAAAAAGGTACCCTAAGCTTTCTGCTCAATGGTACAAGAACTTTCTGAAAAGAAACTAGTGTTAGACCCACCGTTTGAAAGCTATGCAGCACCTAAAAACGGTTAGGTTAAGCTCAATGTTTGTAGTTGTAGCTAATTCCACGTATAAGTCATTAGGTTGTTGTTTTCTGTTAGAATAATTTCATGGCACACTA…
GmaAffx.92992.1.S1_x_at	CF808717	At2g44450	3e-51	Cell Structure			GGAACAATCCAAATTACTTATTGATTCTTTTGATTTTATTGGCATAAACTACTATTCCACTTCTTATGCCTCCGATGCACCTCAACTAAAAAGCAATGCCAAAATCAGCTACCTAACAGATTCCCTTGCTAATTTTTCATTTGTGCGTGATGGAAAACCCATTGGTTTAAATGTTGCTTCAAATTGGTTGTACGTTTATCCAAGAGGATTTCGAGACCTTTTGTTATACACTAAAGAGAAATACAACAACCCTTTAATTTATATTACAGAAAATGGTATAAATGAGTATGATGATTCATCATTATCACTTGAGGAATCTCTTCTTGATATTTATAGAGTTGACTATCATTATCGTCATCTATTTTATCTTCGAGAATCAATTAAGAATGGTGTGAATGT…
Gma.2801.1.S1_at	BI785739	At3g18080	0	Cell Structure			GGAAACCCAACTGTTATCTTATCTGAAAATGGCATGGATGATCCGGGTAATGTGACTCTTCCCAAGGGTTTGCATGACACCACAAGGATAAACTATTACAAAGGCTATTTGACTCAACTAAAGAANGCAGTTGATGATGGAGCNAATGTGGTTGGNTACTTTGCATGGTCATTGCTGGATAACTTTGAATGGAGGTTGGGTTACACATCAAGGTTTGGCATTGTCTATGTTGATTTCAAAACCCTCAAGAGATACCCCAAGATGTCGGCATACTGGTTCAAGCAACTCATTACCAAAAAG
GmaAffx.59853.1.S1_at	BQ612438	At5g36890	1e-152	Cell Structure			TAACTTGCCGTTACATGAGATGCTAGATGACAAACTGAGAGTTCGCTATTTCAAAGGATATCTTGCGTCAGTTGCTCAGGCTATAAAGGATGGAGCAGATGTAAGGGGATACTTTGCGTGGTCATTACTAGACAACTTTGAATGGGCTCAAGGTTATACAAAACGCTTTGGATTGGTCTATGTAGATTATAAAAATGGGCTCAGCAGGCACCCCAAGTCTTCTGCATATTGGTTTTCACGGTTTCTGAAAGCTGGTGAAAACAAGAAGGGTAAAGAAGAGTAGCTTACTTTCTTCATTATGTGTCTTTCCATACCAGATACAAGGAATAAAATAAAGTAAGCACAGAATTCCACCTTTATCAGTACTTGGAAGCTTTGTATGGGCTATAATGCCATTTC…
GmaAffx.28750.1.S1_at	BI967217	At2g26600	1e-128	Cell Structure			AGAAGCCTGGGCATTCATCTGAGAAGAACTATGGACTGTTCAAGGCTGATGGGAGTATATCATATGACATTGGCTTTCACGGACTTAATGCTGGACATTCATCTCTTTTGTCTCTTAAGAATATCAATACTCAAGGGTTGTCNCNNNCATACATGATGGTATTCTTTTTATCTTCTTTGATACCGCTGATTTTCTGGAGTTAGTGATCCTTATGATATCAGCCTGCTCGGCAAACCAGTTCCTGGCAATGAAATGAGTTTGACTTGGCTCCA
GmaAffx.54208.1.S1_at	BE824212	At4g31140	1e-24	Cell Structure			ACTTCATGTGGTGGTTTAGATATTCGTGGTAATATTTCTTATGCATTCAATAGCTACTTCCAAGTGAATGACCAGATTGACAGTGCATGCAAATTCCCTGGCCTTTCTGTTGTCACTGACAAAGATCCTTCAACTGGAGATTGCAAGTTCAAAATCATGATTCAGACAGATTCTGCTGGTCTACATGGGAATGGGAGAATTTGGTCTCTCAGAATAGTACTCTTTGTACTTTTGTTTTTCACTCTTATGT
GmaAffx.24396.1.A1_at	BU547464	At3g55260	1e-71	Cell Structure			ATAGTGCACAACTGGTTGGGCCCTGGTGTTTGTCCAAAGGTTGTCGCAAAAGGTTTCAGGTGCATTTACAGTAACCAGGGTGTCTGGTATCTTGACCATCTGGATGTACCTTGGGATGAGGTATATACAGCTGAGCCACTACAGGGAATACATACAGCTTCCGAACAAGAGCTTGTAATTGGAGGAGAAGTTTGCATGTGGGGTGAGACGGCTGATACATCCAATGTTCAGCAAACAATATGGCCTCGAGCTGCTGCAGCTGCAGAACGCTTATGGAGTCAGAGAGATTCTACCTCACAAAATATTACCTTAATAGCATTGCCCCGGTTGCAAAACTTCAGATGTCTATTGAATAGACGAGGGGTTCCAGCTGCTCCTGTCACAAATTATTATGCTAGA…
GmaAffx.68709.1.A1_at	BI969418	At1g71380	3e-32	Cell Structure			CTTGCCTTCAATAGCAGCTCATCCACAAAGCATAGGGTGTGATGGAGGTTTCAACCCATTTTTCCATTCGATGAATCCTAATCCTAACATATTGGTTGGAGCCATAGTCGGAGGTCCAAACCAAAATGACGGATTTCCAGATGACCNNAGTGATTACAGTCATTCTGAGCCTGCAACTTACATCAATGCTGCTTTTGTTGGACCTTTGGCATACTTTGCCGGTATCCGCTAATGTTTCATTCACCTAAATTACAAGGTTAAGTCTAGATGTCATTTTATCTGCACCCAAAT
Gma.10997.1.S1_at	CD396418	At1g18650	5e-37	Cell Structure			GTCACGGTGGCATTGGACTTGTACACAGCAGTAGTTTCTTCTCGATNGCGCTCTTCTCTGCCTTCATGATGATGCTCTGCTGGGGTTGAGAATGAAAATAAATGGGGCTTGGCCTGGGTATATGGTGCAAAATGCCGTATGTCACTGTATTAATGTGAATGTTATTTTCTAGGTGCTGAACTTGGGACGTTAGTTTTTGGGGTTCTTATAATNTTTTTCTCCACCTTCCACTAGCTATTGGGTTTTTGATTAAT
Gma.16487.1.S1_at	BU091077	At1g18650	2e-32	Cell Structure			GTCACGGTGGCATTAGATTTGTTCACAGCAGTANNTNNTTCTNGATCGCGATCGCCCTCATCTCTGCCTTCATGATGCTCTGCTGGGGTTGAGAATGAAAATGGCTTGACCTGGGTATATGGTGCAAAATGCCTTATTTCACTGTATTAATGTGAATGCTATTTTTCTAGGTGTTGAACTTGGGACGTTAGTTTTTGGGGTTCTTATATAATATTTTTCTCCNNNNNNNANNANNNANNNNNNNNNNNANNAANTAATTGAATATGGTAACAACTTGGCTCCACTTGTTCTTAATCTTAANCTCTGTACGAAGAAGTACATAACGTTGTCAATGAGATGGAAGGGTGGACCTAGTGACACCAATGCTATGTAATTTTTAA
GmaAffx.75793.2.S1_at	AI494968	At4g38710	5e-23	Cell Structure			ACAAAGGGCGGTGGTGAGTGCTTCTGCTTCATCATCATCAGAGAATGGCGGCTACTGTGTCTTCTGCTTGGTCAAAGCCCGGCGNGNGGGCCCTAGATTCCGAGGAACACGAAGCCGAGCTCCTTCAACAGAACAACAACAACCCCAACGACAAGCCACTCGCCGACTTCCCCTCCCTTGCCGCCGCCGCCGCCACCAAGCCCAAGAAGAAGAAGGCCCAGACCTACTCCCTCGCCGAATTCACCGCCAAGCCCGACTCCGCCTTCGCCGACCAAGATCCC
Gma.12193.2.S1_a_at	CA801551	At1g68060	1e-106	Cell Structure			CCCCAATTGATTATAAGATTGTAACTGGCATTCCGATGTCCATTGTTTATGTTATTGGCCGTGGATTGATGGTGAAAAGAGAGTTTAAGGAATCGGGATGCGTCTGACATAGACTCTTGTATTTCCTGCTTAGAGAGAGATCGGCTAAGAAGCCAGGCAAAGGAAGAAAATTAACTTGCATTCCGATGTCCATTGTTTATGTTATTGGCCGTGGATTGATGGTGAGAAGAGAGTTTAAGGAATCGGTATGCGTCTGACATAGACTCTTGTATTTCCTGCTTAGAGAGAGATCGGCT
Gma.4452.1.A1_s_at	AW310094	At2g32240	1e-05	Cell Structure			GTTGGAAGTAAAATCCAGGGACATTGGTTCAAGCCTCTCGATTCCATCAAAAAGAAAGAGCAAGAAAAAGTCAGAAGTAACAAGTGGTCAGACATCATCTTCATCCGAGACTCATGTTCAAACTGGCCATGATTCTCCTGTCATAAATTTCAAGTTCATCTTGGGNGTAGCTCTTGTGTCCATTGTCTTTGGCATAATTCTTGGAAAGCGTTACTAGTATCAGCAGTNTATGTCTTTTGATTTTGTTATTCTTCATGTTTTTTCATTTTTTATGTTTTTTTTTTCTCTCTTCTTTCCCGTTGATTAAGATTAAATACAGATTGAAAGCTTTCTTTGCATGCTTTCAAACTCAAGTCTTCAGCTTGGTCAGGGAACTTGTTTTAAT
Gma.16587.1.S1_x_at	AI736119	At5g49720	0	Cell Structure			CCATGATGTTCGTACAAACTACAATTACACAGAGCCAACNCTTGCTGGAAATGCNGGTTTAGTTGCNGCACTAGTGGCATTGTCAGGCGACAAANGCACATCNATTGACAAAAATACCATTTTCTCTGCTGTTCCCCCAATGTTTCCTACACCGCCACCACCNCCAGCNCCATGGAAACCATAAGCNCATCNTGCCATTGGTTATTTCTTTCTAGCAAGTANCCCAGATGATNTGAGTGCACCGNTAACCTTCGTTGTTTTGTATCAACTNNAAGATCANGGTAATTTTGNAGAAAAAAANGCTTNGNGANNNNGAAGNNNTGGAGCTTGGCCNACTGAATATAGCTGCCTGGGGCCAATGATCGACTCAAGATTNAGCATTAAGAATTGATAAAGTGG…
Gma.16587.2.S1_a_at	BI497998	At5g49720	1e-43	Cell Structure			GGAAATGGAGGGACACTTCTAAGCCAAACCCAAATACAATTGTTGGTGCCATGGTTGCTGGTCCTGACAAGCATGATGGCTTCCATGATGTTCGTACAAACTACAATTACACAGAGCCAAC
Gma.5137.1.S1_at	AW734306	At1g23220	3e-39	Cell Structure			TCAGAGCCGTGCCTTTCGTTGTGCACGTGATCTCCTGGATTCTATGCCANCAAAGAAGCTTGATAGTAAACGCCTGGCCCTCACACTTAAGAAGGAATTTGATTCTTCTTATGGTCCAGCTTGGCACTGCATTGTGGGTACTAGTTTTGGCTCCTATGTTACTCATTCCCTTGGTGGTTTCGTGTATTTTTCCATTGACAAGGTTTATGTCCTTCTCTTCAAGACAGCTGTTGAACCATTAGACCATTCATAGCTTCCACAATTGAGTTATATGCACATCTCCTTGAGAACTTAAAATAATTTAATATTTCAAACCAACTGATGTGTGAAATTACAAATTGTAANATTTAAAGACATTTGTACTCTGAAGTATTTGATGCACTTCAGTTTCGAGTGGGA…
Gma.13110.1.S1_at	CD394837	At1g69530	2e-44	Cell Structure			ATCTTGTTGTCACACGCATACCAGTAGTGCTATATAGTATAATAGATATATAGTATTATGTTCTAGGAGTATTATTATTTTTATGACTGGTTAGTGTACTAGGGTATTAGATAGTATGCTACTAGGTGAAGGGTAAGTTTTTTTGGTGATTTTAGAGGCCAGGGAATTAAGATCTAAGAAGGGGCATGTTTTAAATTGCTCCTTCATTTTAATTTTAATTTCTCGTGTCAACAAGTGGGGACCTAATTTTTTAGGCCCCTCTTGATTACTGGGGTGGATTACTCTTTTCACTTTTTCTAAANGNTTTNTTTTTTTAACCTTCTTGTGGAGAGAAGAAGCTAGTGGCAGTGGACTTTTTAATTAGTTTTTACTATGGGTGAGCTACTAAATTGGAAGAGG…
Gma.7784.1.A1_at	BM269985	At1g69530	0.0007	Cell Structure			AGTATATGCTATAATTTCTCAATTTAAGTGTTAGTATATGACTCCAAAAAAAAGACTAGTATACTAAGGTATTAATATAGTATGCTACTTGGTGGAGGAGGAGGGGGTGGGGTCAAATTGGATCGCAAAATGGTTAAGGGCTTATTTTAAATTGGCTCTTGATCATTTTTTATTGGGTCAAATGGGGGTTCCTAATTCTTGGGGCCTTTTTTTATTATTGGGGNATTTTTATTTTCATTTTTGAAAGCTTTTTCAACCTTTTTGCTGCTGAAAGCTGGTAGAGAGGGAATTTTTATATCTGTGACCTATTAAATTGGAGGAGGTGGACTGTTGCACCACCCGCCATTAGTATAGGAGAAGTTTTTGTTTTTTTTTGTTCCCTAATGGGATTATTTAGAA…
GmaAffx.90097.1.S1_at	CF805822	At3g55500	2e-24	Cell Structure			GTCTAATTACTATGTTTCATGGCTTTTTTTTTTTTTTTTTTTTTACCTCTGTAGTTTTGAATTTACCTTGGGATGTGGATATAAGGGAAACGGCGAGAAAAAAAATGGTGGGAAAGTAATGTTGTGGTAGTGATTAGTCAAACTTTTTGACTTTTTTCGTTGTCTTGGTATACGAGTTTGAAGTTTTATAGTAGGATTCTAGGAAAATGGAGGGAAACTTTATGTAACGGGCTGAAGTGGCTTCAAATGCATGAGCCCGCAGCTAT
Gma.4185.1.S1_at	BQ742395	At4g17030	3e-58	Cell Structure			AAAGGGTTCCATGCACATACACCGGCAATGTCTTGTTCCACATCAAGGAAACTAGCACCAACCCTGGTTACTTTGCTTTGGTCATTCTCAATGTAAATGGAATACACGACGTCACTGCTGTTGAATTGTATCAGATGGGACAATGGAAGTCACTTAACAGGAACTATGGAGCAGTGTTTGACTTTCCTAACCCACCAAGTGGCGAAATCCGGTTAAGGTTTAGGGTGAGTGGCATGTCTGATTGGGTGGACCCCATGATTGTCATACCCAGTAACTGGCAGCCTGGAAATACTTATGCCACCAAGGTTCAGCTTAAATAGAAAGAATCCCAGGAACAGATTACAAATAATAGGCACTAGAGTATATTCAGTTTGTTTCTTATATGGTGTCACTCAATGT…
Gma.16291.1.S1_at	AW350377	At1g04430	0	Cell Structure			ATGGACTGTCCTCTCTGACATAGAACAGAAAGGTTGCAGTCCAGAGGATCTATTAATTGAGATGGATCGCATGCTTCGACCTACTGGTTTCGTGATCATCCGAGATAAACAGCCAGTGATTGATTTTATAAAGAAGTACCTAAGTGCTTTGCACTGGGAAGCAATTGATTCCAGTTCTGACTCTGTCCAAGATGGTGACGAAGTTGTTTTTATCATCCAGAAGAAAATGTGGCTGACTAGTGAAAGCTTTAGGGACACAGAATAGGATAACCATTGCATTTTCATTTTCTTATAAATTATTATCTGCTGCTTCAAGGGATCGAAGCACGTCCTAAGGTGTGAAGCAGTAAAGTAAAACAACTTCATTTTGTAGCATTACATGTTTTCTTTTCATCTAAT…
Gma.6062.2.S1_a_at	CD395597	At4g14360	1e-135	Cell Structure			GACTGTGTTTTCTGATATTATTAAGAAAGAATGCAGTCCAGAGGATTTATTAATTGAGATGGATAGAATCCTAAGGCCAAAGGGTTTCATCATTGTCCATGATAAGCGTTCAGTGGTGGAGTATATAAAGAAATACTTGCCAGCATTACACTGGGAGGCTGTGACCATATATGATGTAGATGATGATGATACAGTGATTATAATTCAAAAGAAAATGTGGCTCACAAGTCAAAGCATCAAGGTCTCTGAATAGTGTCATANTATTCACTTGTATAAGTTACCAGTGCTACTAGGTGTATAAGTGTATTATGTAGCTCTATTCCTAAGGCCTAAGCTTTCAGTGTAGCTCTCTTCACTATAGACG
Gma.3716.1.S1_at	BI968899	At5g64030	0	Cell Structure			GGATTCTTAGGCCTGAAGGAAAACTTATTGTTCGNGANACTGTNGAGATCNTTGAAGAGCTTGAGAGCATGGCTAGGTCTATGCANTGGAAGGTTCGCATGACTTACTCCAAGGATAAGGAGGGNTTGTTATGTGTGGAGAAGTCCAAGTGGCGACCTAAGGAGCAGGAAAAGCTCGAGTATGCTATTGCTTAAGCATGGAGATGAGATGCCAAAATTCTTGGNTTTTTTGGCTACTCGAAATTCCTGTTTAACTGTACTTCCACTGAGTCATATGTATCATGTTAGTTAGGAATATCTATGTATTCTTTTTTCCTGTTGGGTATTAATTTTGATATCCTTTATTTATATTTATTAAATTGGTGACCTCTGTTGTAACATGGTGCCATAGCGTGAAGGAA
Gma.2424.2.S1_a_at	BM524046	At3g15580	5e-23	Cell Structure			TATACCTTGGAACAAAGGCTCGGAGAATCGCGGGATATTGTGGCCAAATATCCCGATCGAGTCCCCGTAAGCCTCCTTCTTCATCCTAATCATCTTCTCCTTTTTTCTTTATATATATTTTAAAATATTTGTTTTAATAATTCTCTTTTTAATCTCGCTTTGTGGATGGATCCTTATAGCTCTCTTGATCCTTGCACTCTACTGTTTATAACGAACGATTCGATTCATGTGCCAAATATATAGAACTAGAACCACACGGTAACGGTAAACATGCTTTCCGTAACCCTAAATTGGTCATTTTATGATTCGATTCTTCTTCTTTACCTTCTGCAGGTGATTGTGGAAAGATATGCGAAATGCGATCTGCCTGAGTTGGAGAAGAAAAAATACCTTGTTCCT…
Gma.1034.4.S1_s_at	BG155028	At4g34050	2e-98	Cell Structure			GAAAGAGATACGCAAGATGACTGCAAAACACCCACTGAACATCATGGCAACACCAGCAGACGAAGGACAACTTCTGAGCATGCTTGTTAAGCTCACGAATTCAAAGAACGCCTTGGAAATTGGTGTATTCACTGGTTACTCTCTGCTCTCCACTGCCCTGGCTCTTCCCCCTGATGGAAAGATCTTGGCTTTGGATGTGAATCGCGAATACTATGAGTTAGGATTGCCAATAATTCAAAAAGCTGGAGTGGCTCACAAGATTGATTTCAGAGAAGGACCTGCTCTTCCGTTTCTTGACGAGATGCTTAAAGATGAAAATAAAAAGGGGTCGTTGGATTTCGTTTTCGTGGATGCTG
Gma.11334.1.S1_a_at	BI967327	At4g34050	2e-41	Cell Structure			CCCAGGATCGAGATTTGCATGCTCCCGGTTGGTGATGGAATCACTAT
Gma.3604.1.S1_at	AW349604	At4g34050	1e-102	Cell Structure			TACTTCACCTGCCACATATGGAAAAAACACAACCTTCTACTATTTTACCTAATCCTTAAATAAACATAATGTGTGTCTGCTTGGATAGTTACTCTGTTGTTGAGTTTTA
Gma.3604.4.S1_s_at	BI317410	At4g34050	1e-51	Cell Structure			TCACAAAAGTCTCCTTCAGAGCGATGCACTCTATCAGTATATACTTGAAACCAGTGTGTACCCAAGAGAGCATGAGAGCTTGAAGGAGCTAAGAGAGTTGACGGAAAAACACCCTTGGAACCTGATGGCTACACCACCTGACGAAGGACAACTTCTAGGCATGCTACTTAAGCTTATCAATGCCAAGAACACCATGGAAATAGGCGTCTTCACTGGTTACTCCTTGCTTT
GmaAffx.88786.1.A1_s_at	CK606552	At4g34050	1e-108	Cell Structure			AGTGTCTACCCAAGAGAACCTGAATCCATGAAAGAACTGAGAGAGTTGACAGCAAAACACCCATGGAACATCATGACAACCTCTGCAGACGAAGGGCAGTTCTTGAACATGCTCCTTAAGCTCA
GmaAffx.88786.1.S1_at	CK606552	At4g34050	1e-108	Cell Structure			GAGGTAGTTGTCCTTGTCCGCATCAACAAAGATGAAGTCATAGCTTCCATGGTTCTTCTCATCTTTAATCATTTCATCAAGAACTGGTAGAGCAGGACCTTCTCTGAATTCAATTTTGTGGTCAACNCCAGCTTTTTTAATTACAGGCAAACCCAATTCATAATTCTCCCTGTTAATGTCCANGGCCAAGATCTTTCCATCTTCAGGAAGAGCGAGAGCGGTGGCAAGAAGTGAATACCCAGTGTAGACACCAATTTCCATGGTGTTCTTGGCNNNGNTGAGCTTAAGGAGCATGTTCAAGAACTGCCCTTCGTCTGCAGAGGTTGTCATGATGTTCCATGGGTGTTTTGCTGTCAACTCTCTCAGTTCTTTCATGGATTCAGGTTCTCTTGGGTAGAC…
GmaAffx.92070.1.S1_at	CF807049	At4g34050	1e-110	Cell Structure			TATGAATTGGGGTTGCCCGTGATTGAAAAGGCTGGA
Gma.1181.1.S1_s_at	BE657911	At3g12110	0	Cell Structure			GAAAATCAAGGTGGTTGCACCTCCTGAGAGAAAGTACAGTGTCTGGATTGGTGGNTCTATCTTGGCATCACTTAGCACCTTCCAACAGATGTGGATCTCNAAGGGNGAATATGATGAATCTGGGCCAGCNATCGTTCATCGGAAGTGCTTCTAANGTTGGGTCAAGNNNAGCTGGATGGTGATCAAGTTCTTCATGCACCCAGTCCTGTGCCATATTTCAGTNAAGTTTGGTTGACTTATTTGNTATTTGAAGCTTTGGGTTTTTAATAGATATATCTAGTTTAATGAATGGATTTGTAAGTTGAGTATGTTATAAGTTTCTCCGTTAGGTCNCCTTGGAAGCCAGACTTTTTNATGCAATTGGCGGATGGTATTGGAACTTTGTA
Gma.1277.3.A1_s_at	AW394783	At5g59370	4e-22	Cell Structure			CTAACTTTTGTTACTCATTCACGTTATTCTCTGGAGTGGTGATTTGGA
Gma.10738.1.S1_at	BG653978	At5g09810	8e-86	Cell Structure			AAGAAATCACTGCACTTGCTCCTAGCAGCATGAAGATTAAGGTTGTGGCTCCACCAGAGAGAAAGTATAGTGTTTGGATTGGAGGATCAATCCTTGCATCCCTCAGCACCTTCCAGCAGATGTGGATATCGAAGGGTGAATATGATGAGTCTGGTCCATCCATTGTCCACAGGAAGTGCTTCTAAGTCCAAAAGAAATGCTTTAATGGTGAGTTATGTTTTTGCTATGGCTTTTTTGGTGTCTGTGTCATGTCGTGCGAACTATGTTGTCATGGATAA
Gma.10738.2.S1_s_at	BQ629434	At5g09810	1e-104	Cell Structure			TGTTTTTATGGGTCTGTGTCGTGTCATGTTANACAATATTGCCATGGATAAAGAGGTGAGGAAGCATCATTAAAGGAGAGGGTCTATTCTTAGCTTGATGCATCATATTTTGTGTGGGGGCCAGACAGTTAGAAAGGCATTTCTTGCGTTTGGCTATCCGTGGTTCATCTATATCTTCTTAGTAGGTTGTTTGTAGCAAGGGAGTGATTGTGATGATCTCTTTTTCCTCCATTTTCTTTTTGTATTTTTAAAGTTTANATTTGAAGGATTTTTNCCCCTTGGAACATTGAATCATTGAT
Gma.6406.1.S1_at	CD394756	At5g09810	0	Cell Structure			TGAGTGGTGGTTCCACAATGTTCCCNGGNATTGCTGATAGGATGAGCAAGGAGATTACAGCATTGGCACCNNGTAGCATGAAAATTAAGGTTGTAGCACCACCAGAGAGGAAGTACAGTGTCTGGATTGGAGGCTCNATCTTGGCNTCCCTCAGCACCTTCCAACAGATGTGGATTGCGAAGGCAGAGTATGATGAATCTGGACCATCAATCGTACACAGGAAATGCTTCTAAGTTATAANNATGGAGTNTGAAAGNTGGACCAGGGAAATTACTATTTATACNAANACTACAAAAATACCATCNAGTGGTTGAGGAACTTTCATTTNCCTACNCTTTACCATNCCTTTTATCTATCTTGTTTTTGTGTTTTCCTTTCTTTGNTATGTTGAGATAAGAG…
GmaAffx.90181.1.S1_at	CF808382	At5g09810	4e-55	Cell Structure			AGTGCTTCTAAGTTGGGTCAAGAGCTGGATGGT
Gma.4270.1.S1_s_at	CF920385	At3g46010	2e-64	Cell Structure			TTTTGTCACTGAAGAGAATTGCCAAAAGAGCAGAATTTTCTTCATTGCTTGGTCCCCTGATACATCTAGGGTTAGGAGCAAGATGATTTATGCCAGCTCCAAAGATAGATTCAAGAGGGAGCTTGATGGAATTCAGATTGAGCTGCAAGCAACTGATCCTACTGAGATGGGTCTTGATGTGTTCAAAAGCCGTGCCAATTAAATGATTCCGATTATTCATAAATAGGAGTTGTGATGGGGATGGTCAACTTGGCTAATTTGGACTCAATTTTCCAAGTTTTGACATGAGGTCTATNGCAGCTTCAACAAAGCTTCTCTTGTTCCAGTGTATCTTGTGGTTTGNGACATATAACCCGTGTTTGGGTGTNATCTTAGNCCTATTCCTANTAGTTAATTTTG…
Gma.6150.2.S1_x_at	CD416056	At5g59880	6e-60	Cell Structure			GGGAGCTGGATGGAATTCAAGTAGAGNTGCAAGCAACTGATCCTACTGAGATGGGTCTTGATGTGTTCAAAAGCCGNGCCAACTAAAATGATTATANAAAATAGTAGGCTTTCTGGTGGGAGCAGCACNCCTNAAGCCTTAGTTACTCATNNGGAAAATATCCTAGTTTGTGGGATGGTCAACTTGGGTAGTTATGGTCCCAAACTCTCNNAATTTTCCAAGTTGTGGCATAAANTTCTATTGCACCTTTTNACAAGCTTTGCTTGTTCCAGTGTGTTTTATTATGATTTGTGATTTATACAACCTTNGCGTTTGAGTGCCANNNNANNNNNNNNANNNCNNANNANNNGAATNNNTAACTGTTTNGTGTTATCAGACAAAAAATGGGGNTTCTTCACT…
GmaAffx.88908.1.A1_x_at	CK605775	At5g59880	1e-64	Cell Structure			CAACCTTGCGTTTGAGTGCCATTTTAGTCGTCTTATCCCTTACTAGTTGAATTTGTAACTGTTTGTGTTATCAGACAAAAAATGGGGTTTCTTCACTTATTGACACTCGTC
Gma.1541.1.S1_at	BE657337	At2g31200	4e-40	Cell Structure			CCTTGCCTGAAAATGATTGCCGATANGCTNTCTTTGACTTTGATTTTGTGACATCTGAGAACTGCCAAAAGAGCAAAATCTTTTTTATTGCATGGTCTCCTTCNNGTNGCCCNGCATTNCGCCCNNNAAGATGCTATATGCAACATCCAAGGACAGGTTCAGAAGGGAGCTGCAGGGCATCCATTATGAGATTCAGGCAACAGACCCAACNGAGATGGATCTTGAAGTCCTCAGAGANCGTGCAAACTGAGCANNNNCCTACACAAGAGGNTTGTGTCTAGGTGATGTAGTTANNATATCTGAGGCCTCAGGGAATGATGTTGACTGATNNNACCCTTTAGTTNTTCTACTATGATCNCTGTCTGTTTCGNNACNTATTTCTCNTAAATNAGCTGACTT…
Gma.5989.1.S1_at	CD399531	At2g17390	1e-114	Cell Structure			TAAGAATAAGAACACTGCTCTCCATTATGCAGCTGGTTATGGCAGAAAGGAATGTGTGGCCCTTCTCCTTGAAAATGGTGCTGCAGTTACTCTCCAGAATATGGATGGTAAAACTCCAATNGATGTTGCGAAGCTAAACAATCAAAATGAAGTCCTNAAGCTACTTGAGAAAGATGCTTTTCTGTANTTGNAATGCATGATGCCATGCTGTCACCAACAAG
GmaAffx.6454.1.S1_at	BQ740636	At3g04710	1e-33	Cell Structure			AAGGAGCGGCTCTGCGTTTGTTGCAGAAATTTGATGAAGCTGCAAATGCTTTTTATGAGGGAGTAACGCTTGATCCTGAAAATAAGGAGCTTGTAAATGCGTTCAGGGAAGCTGTCGAGGCTGGGAGGAAATTTCATGGAACGGCTGAAAATAAATCATAGTTTAGCCTTTTGTTAATACCATGTTTCAGAGAGAAGAGATCAAAATATTGCGGGTGGTGCAGCCTTATTCACTTGATCCTTTTTTCCCCAATGTGTGTGTGCGTGTTTTCTTTAACTAGTTACTGTCGTATAGGAAGAGTCAGCTAGTAATCTGTTTCATTAAATTGTTTTAGTAATTATAAAGGTTATGCTTATTTGACATGTTCCAAAATTGTTGCAGAATTAGTACACATTATGA…
Gma.3674.1.S1_at	BI784836	At3g12360	6e-35	Cell Structure			GAATTCTCCAATTCCGAGGTTGATCCGATTTATGCGCTTTGAGTTTGAACTTGCAACCTTCAGGGGATCATGAAGAACAAATTGTTGTGAAAAAGATGACAGGTTTTTAGGTTTGCTACTTGCTCCATGTTACCACTTTAAGAGTTCTTCACTGTACAGGAAATTGTTCTCTTCGGCTTAGCTGCTGCTTTTCTAGGATCTTATATACAAATTGGAATGAAGCATGCATCATCATTGGAATGAAGCATGCATCATCCCGGTCTGTGATTTTTAAGAACAAAATCCAACATTGCTTTAATTCTCAATTATGTATTGATGTATTAGCAAAATGTCTCCCTTCCCTGTTCGTTACTGTTTTTTTTCTATCACTAGAATTGTCTTCGGGGCCTAATCTACACN…
Gma.13293.1.S1_at	CD392693	At1g68725	0.008	Cell Structure			GCTCCCTCTGGCAAAGAAGGTGCGTTCTCCATTTGGTATGCTTGGATGAGAGCTGCAGGGCTGTGCGTGGGGTTCACGGTGGGGTCGGTCGCGCCGGGACGAGTTAGGACCTCGTTTGGAGTTGCGTTTTGCACTGCCATTGCTGGAATTGTGGTACTGCTTTTCGGGAACATCAGTGATGTTGGTGGTGCTGTTGCTGCGGGGCACGTTAGAGATGAATGCGAGAGAAGTTCGGCTGTGCTGCCTGGCTTGGATTCTAAGGAATCTGCACGCGTTTGAATAATGGAAACTGGAAAATGAAGAAGATTATTATTGTTGTTGTCTTGTGGGTCATATGATTCTTTGCAAAATGATGTTAATGCATGCAAGAGTAGTATTATAAGGTTTCTTTTTATGATT…
Gma.11125.1.S1_at	BE822591	At2g41740	1e-132	Cell Structure			GGATGAGTTCAACACTGTATTTGGAATGGCAAAAGAAGCATTTTACAAGTTGCCAAGATGGAAGCAAGACATGCTGAAAAAGAAATACGAATTGTTCTAAACTTGAAATGAAAGAGTGACGTCTGCTTCTTTAGCTGCTATACCTTTCCTCAGTTATCTTTAAAATGCTCTTANCTGTTGNGATAGTGTGGTTTTATTGGGTATATACCATAGTTTGGGTTCTTATCATAGCGTTTTGCTTTCGGCCTATATAATGGGCGTAGCTGTGGTTAGTGTCCAAGTTTGAATGTGACGCCGCATGCATGGAGAGTGTTTTTTAGTTTCTCCTTTTAGATTTTGCTGTTGCCTCTTGCAATGTTTGCATATTGTAGCAATGAAGACACTAGACAGTGGGCAGGT…
Gma.4319.1.S1_s_at	CD393260	At3g07230	7e-15	Disease & Defense			ACCTATAATGACAGAGTGACAACAAATTTGCTGCATTCAGTTGTAGAATGATAATAGGTGGTAGNTATTGCATTTGGTTCTACAAAATTAAGATCATTTTGGCTGTGTTCTGAGGTATATGTGGTGTTTTAGACTTTGTTATTGTAATGGTTTGATTTTGGATATGGTTATAATGGACTCAAGTTGA
GmaAffx.59534.1.S1_at	CD417706	At4g21610	3e-33	Disease & Defense			AGATGATGAAGGTCCACCTCCGGGATGGCAACNTCTCCCCGCTCAGCCACCGCCACCGCCACGTCCATCCGGTTGGGCTCAAATGGTTTGCGGTTCTTGTCNTCGCCTGCTTTCATATCCACGAGGTGCCAAACATGTCAAATGTTCATGCTGTCAGACTGTCAACATTGTATTAGAAGCTGATCAGGTTGGGCAAGTTAAGTGTGGCAGTTGTGCGGTATTGCTGATGTACCCATATGGTGCTTCACAAGTTAGATGTTCATCATGCCGATTTGTGACAGAAATTGGGGCACACAACAAGCGGCCTCCATGGTCTGTACAACAAAGGAAGCCATCTCCTCCAAAAACTGGTTGTTAGTGGCCTGTCCGTTGGCCTAGTAGATGGATCATCCT
Gma.8449.1.S1_at	AF002258.1	At1g65060	0	Disease & Defense			CAATGCTTCACTGCATTAAGTCAAAGTCCNAGAAGCAGTTGCACTTACACATAATCATTGTATTTTTGTGTCCATTGCCCACCACCATGCCTGTATTGTGATTTTAG
Gma.6332.1.S1_at	BG237174	At5g63380	4e-33	Disease & Defense			ATACAAGGGCTACCAGGTTGCTCCGGCAGAGCTAGAAGAGTTACTCCTATCTCATTCAGAGATAAATGATGCTGCAGTTATTCCATACCCTGATGAAGTAGCAGGCCAAGTGCCCATGGCGTTTGTGGTGAGACAACCTCAAAGTTCNNTTGGCGCAGCAGAAGTTATTGATTTTGTTGCCAAACAGGTTTCACCGTACAAGAAAATAAGGCGTGTAGCATTTGTTAATTCCATACCCAAGAATGCTGCGGGAAAGATACTGAGGAAGGACTTAAAACTGGCGCTCTCTAGGTTGTAATATGCTTCATTTTCGTTTTATAAGTGGTGTTTGATTTAGTCTTTTGCTCCAAATGAAAAAAAAAAAGAAGAAGCAATGCGTGTGTTCAGTTTAA
Gma.11119.2.S1_s_at	CF920743	At1g24020	1e-05	Disease & Defense			AATAGAAGCGATTGATGAGGCTAACTTGGGATATAGCTATAGCGTAGTTGGGGGAGATGGGTTGCCAGACACAGTGGAGAAGATCACATTCGAATGCAAATTGGCTGCTGGCGCCAACGGAGGGTCTGCTGGGAAGCTAACTGTCAAATACCAAACCAAAGGAGATGCTCAGCCCAACCAAGACGACCTCAAAATTGGCAAAGCCAAGTCTGATGCTCTTTTCAAGGCCGTTGAGGCTTACCTTTTGGCCCATCCTGATTACAACTGATCCTCTTCATCACTATTCAGTCAGCAACGACCTTGCTTTATATTATATACAAGAGTTTTCTTGCCTTGTGTGGAGCTTTATCCAATCACTGTGTGTGGTGTGTGCTTAA
Gma.6999.3.S1_s_at	CF921432	At1g24020	8e-05	Disease & Defense			CTAATCCAATTCGATCAACTTCATGATTATCATCACTATCTCTCTTGCTTTTTCTGAGACTTCATATATCTGTA
GmaAffx.85114.1.S1_s_at	AW760844	At1g24020	3e-06	Disease & Defense			ACTCTTGCTGAAGGTTTAGGTTATGTGAAGCACCACGTAGATGCAATTGACACAGAAAACTATGTGTACAACTATAGTGTGATTGAAGGCAGTGCATTGTCGGAGCCATTGGAGAA
GmaAffx.89795.1.S1_s_at	CK606628	At1g24020	8e-10	Disease & Defense			GAGGATCCATTGTGAAGTCCACAAGCAAATACTATACCAAAGGTGATGAGCAACTCGCCGAAGAATATGTGAAGACTGGCAAGGAGAGATCTGCAGGTTTCACCAAGGCTATTGAGGATTTCATTCANGCTAATCCTGATTACAACTAATTAAGTCACCAATTATAATTATGTCTCAG
GmaAffx.91442.1.S1_at	CF805736	At1g24020	3e-08	Disease & Defense			GGATATAGCTACAGCGTAGTGGGTGGTGCTGCGTTGCCAGACACAGCGGAGAAGATCACATTCCACTCCAAATTGGCTGCTGGTCCCAATGGAGGCTCTGCTGGCAAGCTCACTGTCGAATACCAAACC
GmaAffx.86757.1.S1_at	BM567976	At5g28010	5e-26	Disease & Defense			ACTGGACTTATGTCATAGACGGCAAGGTACACACATGTCAGGAGAGTATTGAAGCCATTGATGAAGAGAACAAAACAATCAAATTCATGCTCTTCGGTGGAGATATTAGTCAGCACTACAAGAGCTTTAAGCTGATCTTTGAAGTGACTGATAAGAACGATGGCGGTGCTGCTGTTAAATGGACTCTTGAATATGAGAAGATCAAAGAGAATATTGATCCTCCACATGGCTACATGGACTACTTTGACAAATCCACTAAAGAGATGGATGCTTATCTTGTCAAGGCATAGCTCCTAAAATTATCAAGAAAATAACAACAAAGGAGTAATGGATTTGGCTTTGAGGATATATATATATATATATATATATATATATANNNNNNNNNNNNNNNNNNNNNNN…
GmaAffx.29692.1.S1_at	AW348396	At4g01700	2e-46	Disease & Defense			GATAGCCTTCAAAACTGCTATGTGGTTTTGGATGACAGAGCAAAAGCCAAAACCTTCATGCCACAATGTGATGGTTGGGATATATGTGCCGACAGAAGATGACATAGCAGCAAACCGAACAGCGGGTTATGGTTTGGTGACTAACATAATCAATGGTGGACTGGAATGTGGGATTCCTGGTGATGCAAGAGTGAATGATCGGATTGGGTTTTTCGAAAGGTATACGAAGTTGTTCAACGTGGACACTGGACCTAACTTGGATTGTGCATATCAGAAACCCTTCTAACT
GmaAffx.90350.1.S1_s_at	CF809070	At1g05850	1e-78	Disease & Defense			TCCAGAATACATAGAGCAGAATGCCACCCTTGCTTTCCAGGCTGCNATTTGGAGATGGATGACACCAATGA
Gma.11154.2.S1_at	BU547879	At1g63220	4e-46	Disease & Defense			GAGGCAACCATTCATTTAGATCCAGTGTTTGAAGCCGGTAGCATTCCAGAAACTGCTTACAAGGTTGTGAAGGACGAAGAATATTGTGGTGAGATTAAGGTGGCTCTCACTTTCACTGCTGAGAGAAATGAGGAGCAGGGNTATGATGCACCTGAAGAGAGCTATGGTGGATGGAAAGAATCCAGTGGGGAATATTAAAGTGAAAGAAGAATTTACATACTTCAATGGCCAGACTTACCTTTATAATGAAAAATAAGCAGTTTTGGTGTCACTTTTAGGCAATTTCCATTATTGTGTTTTCTGGTGTGAAGATCCAATAGTGTTGTGCTTTTAGGTTGCATTCCTCCCTTTGGATATTAAAGTACATTATGCTTGATATATTATCTTTTATGCGTCAGT…
GmaAffx.90134.1.S1_s_at	CF805859	At5g34850	8e-77	Disease & Defense			GAGGGTGAAAGCATGCGATCTGTTTTTGAGAGCTGGTTCATCGAGTACAAAGTTGATGTGATCTTTGCTGGCCATGTCCATGCTTATGAAAGATCATATCGATACTCTAATGTTGACTACAACATAACAGGCGGTAACAGGTATCCATTACCTAACAAATCAGCACCTGTTTACATAACAGTCGGAGATGGTGGAAATCAAGAAGGTCTTGCTTCAAGGTTTTTGGATCCACAGCCAGAATATTCTGCTTTTCGAGAAGCAAGCTACGGACATTCCACACTGGAGATAAAAAATAGGACCCATGCTATCTACCACTGGAATCGCAATGATGATGGCA
Gma.10850.2.S1_at	CF920623	At1g76180	3e-11	Disease & Defense			GAAGACAGAGGAGGCCACAGCTACTACTCCTCCTCCACCACCACCTGTTGCATCATTGGAGCATGGTGAAGGTGCTCATCATGAAGGAGAGGCCAAGGAGAAGAAAGGTATATTAGAAAAGATAAAAGAGAAGCTTCCTGGTTATCACTCCAAGACAGAGGAGGAAAAGGAAAAGGAAAAGGAGAGTGGTGCTCATTGATATTTAAGATTGAGACAAGGCTTTTTTGTTGGTTGGAGATGCATGATTGTGGTGTGCTTTGTT
Gma.11263.1.S1_a_at	CA802847	At5g25610	4e-76	Disease & Defense			GGAAACGGGATTGCAGAAATACACCGTAGCACCGGGAGTGAAGAAGTTATCAGGGGACAAGGCTGTTGTGTGCCATAAGCAGAACTACCCTTATGCTGTTTTTTACTGTCACAAAACCGAGACCACCAGAGCTTACTCTGTGCCTTTGGAGGGTACTAATGGGGTTAGGGTTAAAGCGGTAGCAGTGTGCCACACTGACACATCAGAATGGAACCCTAAACATTTGGCCTTTCAGGTGCTCAAAGTTAAGCCAGGAACTATTCCTGTCTGCCACTTCCTTCCTGAGGATCATGTTGTTTGGGTTCCCAAGTAGATTTGC
Gma.9638.1.A1_at	CA936403	At5g25610	2e-15	Disease & Defense			AAAAGGCTGTGTTTTACTGCCATGAAGTCCATGAAACAACAGCTTTCATGGTTCCATTGCTTGCCGGTGATGGAACCAAAACTCAGGCACTTGCTGTTTGCCACTTTGATACTTCGGTCTTGAACTTTGAATTGTTCCGTCAAATAATGAAAGTTGATCCTGGAACTAACCCTCTTTGCCATTTCCTTGGAAACAAGTCCATTTTGTGGGTTCCCAATTTAGCCACGGAGGGTGCCTCTCAGACTAAAATTGTTGTTTAATTAGTGCATCTTGGGCACCATCAGAAATGTGTGTATTATAAATAAATTATAATGTGATGTTGTGTATTTCTGCCCGCCGGCACTACCCTTTTTAGCTTAGAGCTGGAAATGGAGCTACGAACCTACGTGTACTGTTGTT…
GmaAffx.5264.1.S1_s_at	BM521512		4.1e-29	Disease & Defense			GTTGGTGTTTTGTACATCTAATGATGATAGTTCGTGTGGGGATATTGTGGCTCCCATCGATCGTGAAGGAAACAGGCCTTTGATTGTGACTCATGATCAGAATCATCCATTGTTGGTTCAGTTTCAGAAAGTTGAAGCTTATGAATCATCAACTGCATGAGTTGGCCTTGAAAAATCATGCACGTGCTTTCCGGAATTATTCCGATACTTTGGTTACTTGTAAGACCG
Gma.10773.1.S2_at	CD398431	At5g36930	1e-121	Disease & Defense			ACGGGACGAAGAGGCTCTGCCACATCCGCGGGAAGATGCACAAGAAGGTGTGGATCGCCGCCGGAGACATCATCCTGGTTGGACTCAGGGACTACCAGGACGACAAGGCTGACGTCATCCTCAAGTACATGCCCGACGAGGCCAGGCTCCTCAAGGCCTACGGCGAGCTCCCCGANACCACTCGCCTCAACGAGGGCATCGGCGCCGGCTTGGACGAGGAGGACGACGCCACCGCCAACGACTACATCGAGTTCGAGGATGAGGATATTGATAAAATCTAATCNCNCTCNCNNNCGCAATTATCATTCATATNNTNTCNTCNNNNTNTCTGTCTCTAGTAGTATTTCGCTCTCTGCTTG
Gma.957.1.S1_at	CD396846	At1g22900	2e-34	Disease & Defense			AGGACCTTGGGATGTTCATGCTCACCAATTTCGCTTTCACCGAAGGAGCTTATGCTGGAAGCACGTTGAGCATGCTTGGGAGGAATCCCATATCGGAGCAGAATAGGGAGTTGCCCATTGTTGGTGGCACTGGCGTGTTTAGATTTGCCACTGGCTATGCCATTGCTAATAGCGTTAATTCCGTTTCTACCCCTCAACATTTTGTTGTCGAGTACAATGTTACAGTGTGGCATGGCTAGTGTGTTTTTTTTTTATCTATAAAAATAAAATATGATACCAGAGAATTTATAATTCTGTTCAAATATCCGAACTATATCCCTTTGTAGCCGTTTGTAGTGAGACCATGGGAGTATGTATGCCTTGTGGCACCTAGAGTTAGAAGTAGCAAGTGATATGGTC…
Gma.4330.1.S1_at	CD396375	At1g65870	5e-36	Disease & Defense			GGAGCGTTCTCTGAGCAATCAATAATCAAGTTACCCACAGACCAACCAAGGGTAGAGAAACTGACCCACTTGCATTTTTTCTACCACGACATCTTAGAGGGCAAGAACATCACGGTGGTGAAAATCATCGAGCCATCAGCGAGCGAGGTTCGTGAAGCAACTGGGTTTGGAACCACTTTCATGATGGACAATGTTTTGACCGAGGGTCCAGAGCTGAGCTCGAAGCACGTTGGGAGGGCTCAGGGGCTGTTTGGCTTGGCCTCTTTGGAGGACCGTGGAATGGTGATGCTCATTAACTTGGCTTTCAGTGAGGGTGAGTATGCTGGCAGCACTCTCAGCATGCTTGGGAGGAACCCTGTTCAGGACACTGTTAGGGAAATGCCCATTGTTGGAGGCACG…
Gma.9504.1.S1_at	CA803130	At1g64160	1e-06	Disease & Defense			TACAGTCACATCTAGTCTCGACGGGCTTCGGAGCATTTCGATCGCCAAGCTAACCCTGCGTTTGAAGCACCACAAGGGCTCCCTTTCCATTGTTGGTGTCACAAACAATGTCAAACCCTCTGATCTTCCAGTGGTAGGAGGCACTGAAGATTTCATGTTTGTGCAAGGCTATATTAGTACTTCTCCAGTTGATCTCAAGGGTCTTACTGTTGTCTACAAGATTGAGTTTCATCTTTACTGGCCCCCATATGCAACTCAAGCCTCATGAACTATGTTGCATGGGTAGAATTTATGTATGTTGTGAATTTTAAGGTATCCCTGTATCTATGGTCATGAAGGTCCTGAACAAGAACAGCCTAATAATTTTGTTTGGAAAATTACCACCTGTAGCGTTATTGT…
Gma.2102.1.S1_s_at	BM523392	At2g28670	8e-37	Disease & Defense			AGGGATTTTACATTGCCAGCGCTGTCGATGGAGCAAGTCAGCTTATGGCTTTCACCGCTAAGTTTGAAGAGAATGGTTACGTGGACAGTCTTAGTTTCTTTGGCGTTCATCTAACGCAGGTTTCGGAGTCTCAAATTGCCATCGTTGGAGGCACCGGAAAGTTTCTCAACGCAGAAGGCTTTGCCATTATTAAGACTTTTCCTGTTATCGGCGGTCAGCAACATAACACTGACGGTGTCCAGACTCTGTTGCAGCTCACTGCCTATCTGGCATACTAGCCTCTCTCTCTCTCTCTCTCTCTCTTATATGCTGTGCTG
Gma.15568.1.S1_at	AI442650	At5g49040	3e-39	Disease & Defense			GGCTCCGTTGGAATCTTTGACACCCCTTTAACCGTGGGACCTGAGGTGTACTCCAAGGTTGTCGGAAAAGCCGAGGGCTTGTTTGCCTCCACGTCACAAACGCAGTTTGACCTGTTACTGATTTACAACTTCGCGTTGACCCAAGGGAAGTACAACGGCAGCACCATCACGTTCACGGGGAGGAGCCCCCTCTCGGAGAAGGTGAGGGAGCTGCCCATTGTTGGTGGTAGTGGGGTCTTCAAATTTGCCACTGGGTATGTTGAGTCTAGGACGCTAAGTTTTGATCCCCAAACAAGGAATAACACGGTTCAGTTCGACGTGTATATTTACTATTGATGATTATTGAATGTGTTTTTTTCATGTTGATGCGTTATCGCTTTGGTCTGTCTCACCTAGTTT…
GmaAffx.93558.1.S1_s_at	CF807323	At5g49040	3e-35	Disease & Defense			TACTGGCACGAAGTCTTCAGCGGAGAAAACCCCACATCGGTTAGAATCATTCCCNCACTCCCCAAATACAACNCAACCACAACCTTNGGNTCNGTTGGNATCTTNGACANCNCTTTAACNGTGGGACCNGAGGTNTACTCCAAGGTTGTCGGAAAAGCCGAGGGCTTGTTTGCCTCCACGTCNCAAACGCAGTTNGANCTNTTNCTGATTTNCAACTTCGCNTTGACNCAAGGGAAGTACAACGGCAGCACCATCACGTTCACNGGGAGGAGCCCCCTCTCGGAGAAGGTGA
Gma.6803.1.S1_a_at	CF922291	At2g15970	7e-28	Disease & Defense			CACCATTTGGACTTGGTTGATATGTGAGAATTAAACCAAGTGTCTTCTGTATCATTCATTTGTTGCAACTTGATATCTATAAACACCCGGCCATTGT
Gma.6803.2.S1_s_at	BU082740	At2g15970	2e-53	Disease & Defense			GGTTTCAGAAACTCCTTCACTAAAGCTCACGGCATATCAAATTCCATTGGCATAATACTTCTGTTGGTTTATCCCATCTGGGCGCTGGTGGTCATACTTTTTTAGGCACCACCATTTGGACTTG
Gma.4265.1.S1_at	CD407325	At1g20850	1e-147	Disease & Defense			TATTGTAGAAAACGGTGGACTCCACAAAGAGGAAGATTATCCTTACATTATGGAGGAAGGTACTTGCGAGATGACTAAGGAAGAAACCGAAGTTGTNACCATTAGCGGGTACCATGATGTGCCACAAAACAATGAACAGAGCCTATTGAAGGCACTTGCAAACCAACCCCTCAGTGTGGCCATAGAGGCTTCAGGCAGAGATTTCCAATTTTACAGTGGGGGTGTTTTCGACGGGCATTGCGGAAGTGACTTAGATCATGGTGTGGCAGCTGTTGGATACGGAACTGCGAAAGGTGTGGATTATATCATAGTGAAAAATTCATGGGGATCTAAGTGGGGAGAGAAAGGATACATAAGAATGAGGAGGAACATTGGAAAACCCGAGGGAATCTGCGGTAT…
Gma.257.2.S1_a_at	CD400364	At3g12490	2e-14	Disease & Defense			AAACAAGTGGTTTCTGGCACCTTGTACTATATCACTTTGGAGGCAAATGATGGTGTGACGAAAAAGGTTTATGAAACTAAGGTGTTGGAGAAACCATGGTTGAACATCAAGGAGGTTCAGGAATTCAAGCCCATCACTGTTGCTGTTAATCCTCTTTCGGTGACGGTCTAGCACATAGCTAGGTTATGGAAGTGACTAGCTTGGCCGCAAGAGTAATAATATGTATGAACTGAATAAATGTACCTATTAACTCTACAAACGGTGTGGGGTTGTGCATGTTTGCCATCCTATATATTTCAGTA
Gma.2840.1.S1_s_at	CD404417	At3g12490	1e-35	Disease & Defense			GTGGTTTCTGGTACCTTGTACACCATCACTTTGGAGGCAAAAGATGGTGGGCAAAAGAAGGTTTATGAAGCCAAAGTTTGGGAGAAGNCATGGTTGAACTTCAAGGAGGTGCAAGAGTTCAAGCTTGTTGGAGATGCACCTGC
Gma.3081.1.S1_at	D31700.1	At3g12490	1e-71	Disease & Defense			ATCCAGCAAAGGTCTAATTCACTAGTACCCTATGAGCTTCATGAGGTTGCTGATGCAAAGGCTGAGGTCATTGATGACTTTGCCAAGTTTAATCTGCTTCTCAAAGTCAAGAGGGGACAGAAGGAAGAGAAGTTCAAGGTAGAGGTACATAAGAATAACCAAGGTGGGTTCCATCTAAATCAGATGGAACAAGATCATTCCTAATTCTGATNNGAAGTTTGGCCACGCTAGCAGTATAGGCCTGGGTGGCACCTAAAATATACCTTTTTTTTTNCAGTGGGGTGTATGAATCTTATTATCTATGCTATACATAATTATATACTAATNGGGTATTGTTCTTATCTCTGTCTCAGCAAGTATGTTAGTGCTTACCCCTTTCTCTAAGCCTTGGCAGATAAG…
Gma.10988.3.S1_s_at	CA938233	At1g47128	0	Disease & Defense			TCTCAAGAGCAAGAACAACCCATTCGGAGTGAAGGCATTGAGGCGTACTCCGGCTAAACCCCA
Gma.10988.3.S1_x_at	CA938233	At1g47128	0	Disease & Defense			GTTGCTGTCCTCTTGAGGGTGCTACCTGCTGTGATGACCACTACAGTTGCTGCCCTAACGACTATCCCATCTGCAACACTTATGCTGGAACTTGTCTCAAGAGCAAGAACAACCCATTCGGAGTGAAGGCATTGAGGCGTACTCCGGCTAAACCCCATTGGACCTTTGGGCGTAAGAACAAGGTCAGCAGTGCTTAAGCAGATAAAGGAAATGTGAACGTGCAGGAAGGAGCCAATGATGAAGTAAATGAAAGACGAAGAATTAAAACACCAGCTGATACACTTCCCCTTTACCTTCACATAAATTTCTCTGTGCCATTTTATTATGATACAAATTGATACTATTCTGTATCAAATTTCAGTCAGATATTGGCTGTGTACATAGGGTTATATTATTGAT…
Gma.7980.1.A1_at	BU546909	At1g47128	7e-61	Disease & Defense			GGGACATCAATAGACCATGGTGTTACAGCTGTTGGGTACGGAACAGAAAATGGAATTGACTATTGGATCGTCAAAAATTCATGGGGTGAGAATTGGGGAGAGGCAGGTTATGTAAGAATGGAACGTAATATAGCAGAAGACACTGCAGGAAAGTGTGGAATTGCGATTCTGACATTGTATCCCATAAAGATTGGCCAAAATCCCTCAAACCCAGATAACTCCAGCTAAACCCACCGGGAANTTACAGGAAATAACAGGAAGACTAAAAGAGTTCTAGACTTCTGTTTAGTGGAAGTTATCTAGCCCATGAATGAAAAGGTGAAAAAAGAGAAGATTAGGCCGTACTCATTCTCTATTCTCTAATTTGAACCAGCCATCAAGGCCGTACGAGAAAGATAT…
Gma.2302.2.S1_x_at	BU965409	At3g45310	1e-139	Disease & Defense			ACATGTGTGGTGTTGCAACTTGTGCGTCTTATCCAGTTGTGGCATAAATTGCATAAGAATATGGTCCCTGGTGACTACCACCTTGTCATGCTTCAGAGTTTAAAGATAAGTGTCATTGTATAATGAAAATTGCTCCTAGTTGGGTTGGTATGATGTATTAAATAAGTTAGAAGTTGCTGTAAATCACGTAAGAATATCATGGCCTGAATTGTGTGTA
GmaAffx.45690.1.S1_at	BG237455	At3g45310	2e-15	Disease & Defense			GCATCTTATCCTGTTGTGGCTTAAATGTATGCAGAGAGATGTGGTGCCCGATATGCCCGTGTAACTGCACCTTGCACGTCATGCTTCGTATCGTCCATCTTAAAGGGTGAAACATTGTACTGCGATAAAAATTTACAGTATATGTTGATGTTTATCTGTAAAATAAGTTTGGAATTGGGATGTTCATTCTNCTTGANCTNNATNNCATTACAAAATCGTACTGTAAATCATTTGTCACATAGAGGTATCATAGAAATTATAAACTGTGTTATGCTCCCCAATCTCTAGCAATGTAAGGATAGCGTGCTGTGTAAAATCTGCGCACACTTGAGTTATCATCAGTCCCAATGGAGTAAAGTTTATTTGGTTAGTCCATCTCAATATTACTTT
Gma.430.1.S1_at	CD403334	At4g16190	1e-140	Disease & Defense			TCTGGTGCTTATGCTCCAATTCGTTTTAAGGAAAAGCCTTACTGGATCATAAAGAATTCATGGGGGGAGAGCTGGGGAGAAGANGGATATTACAAGATCTGCAGAGGTCGCAATGTATGTGGGGTGGACTCGATGGTCTCAACTGTNGCTGCTATACATGTTTCTAACNATTAAATATAAGGATGGATGCCTAAACNTGGTAGGGGCACCAGTATAGTNTGTATGTAAATAATTTNCANGATGTANNATGTTATGNAGGAGGAAACTGCTAAGCNCATGTTTATGCTTTTATNCTGTAATTCTCTATGCTAGCTAGTCTAGCNACAAATNATTACCCACNGTTATNNANNNNNNANTGCAAGTAACCTGAATGAAATTAAT
GmaAffx.93338.1.S1_s_at	CF809059	At4g16190	6e-94	Disease & Defense			GTCTTCAAGTCCAACCTCCGCAGAGCCAGGCTGCACGCCAAGCTCGACCCCTCCGCCGTCCACGGCGTCACCAAATTCTCCGATCTAACTCCGGCCGAGTTCCGCCGCCAGTTCCTCGGCCTCAAGCCGCTCCGCTTCCCGGCGCACGCCCAGAAGGCGCCCATCCTCCCCACCAAGGATCTCCCCAAGGATTTCGATTGGCGAGACAAAGGAGCCGTCACTAACGTCAAGGACCAAGGGGCGTGTGGTTCGTGTTGGTCTTTCAGTACGACGGGAGCGTTGGAAGGAGCTCATTATCTGGCCACTGGTGAGCTCGTGAGCCTTAGCGAGCAACAGCTTGT
Gma.8022.1.S1_at	BQ628998	At3g05600	1e-109	Disease & Defense			AGCTGACGACACCATGGACAAGAGTGCAAATCAAGGTGCCTGTAAAATTCATTGCAGGTGAATTGGACATGGTATACACCTCGCTAGGAATCAAGGAGTATATCCACGGTGGAGGTTTCAAGGAAGACGTGCCGAATTTAGAACAAGTGATTGTGCAGAAAGGAGTTGCTCACTTCAATAATCAAGAAGCAGCAGAGGATATCAGTAATTACATACACGATTTTATCAACAAATTCTGATCTGATCCAAAAATGAATTCNACCTGGAATAAAGTCGCAGGATCGTGCAGTTGATGTCAAAGGGTCCAAATTGTTAAGTTCTGTTTTTATTTTATTACTAGCTATGTAACATGGGCGACTCATGTTAGGGCTTATGGCATATTTGGGATGACA
GmaAffx.70414.1.S1_at	BI943959	At3g05600	1e-26	Disease & Defense			GGCATCGTAGATGTACCGGTTAAGTTCNNNNNAGGTGGCGTTGACTTGGTGTACACTTCTCCGGGGATGAAGGAGTATATCCACAACGGTGGTTTCAAGAAAGATGTGCCAACTTTAGAGGAAGTGGTGGTGCAGGAAGGGGTTGCACACTTCAACAACCAAGAAGCAGCAGAGGACGTGAGCAATCACATCTACGACTTCATTAAGAAGTTCTGATTCTCATCAGTGCTTAATCATTCCATTATGTCCACAACTTTGTGCCGTTTTCTGTTTCAATCAACCCGAATAAAATCATACCGTTTTAGTGCGCGTCTAGATTGCAAATTT
GmaAffx.88251.1.S1_s_at	BU964415	At3g05600	7e-56	Disease & Defense			AGCAGTGGTGTTGTTCTTGCACGGCTTCCCAGAACTCTGGTACTCATGGCGCCACCAGATTCTAGCTCTGAGCTCCCTCGGTTACCGTGCGGTGGCACCTGATCTCCGTGGCTACGGTGACACAGAGGCCCCTTCTACGGTGAACAGCTACACGTGTTTTCATCTGGTGGGTGATATCATTGCTCTCATCGACTCTCTGGGTGTGGACAAAGTGTTCCTGGTGGCTCATGATTGGGGTGCCATCATCGGTTGGTACCTCTGCTTGTTCCGACCAGACAGAATCAAGGCTTATGTGTGCCTCAGTGTC
Gma.15487.1.S1_at	D63781.1	At4g02340	1e-115	Disease & Defense			ACATGGTATACAACTCGCTGAACTTGAAGGAGTATATCCACGGCGGAGGGTTCAAGCAAGATGTGCCAAATTTAGAACAAGTGATTGTGCAGAAAGGAGTGGCTCACTTCAATAATCAAGAAGCAGCAGAGGAAATCGATAATTACATATACGATTTTATCAACAAGTTCTGATCTTGTCCAAAAACGAATTCAACCAGATATAAAGTCGCAGCTGAAGTGAAAGGGTGTTATAATTGCGCTTTTGTTTTGATATTTAAGGTATCGAGATCTTTTTTATGGGCAGGATTCATCAACTGCAGAAAACCTCCATACCATCAACCTTCCTATGCTTGTTTGTATTAA
Gma.7257.2.S1_at	BG155489	At4g02340	1e-125	Disease & Defense			TGGTGGTTCACCTGACCTTCGTATTGATCTACCTTCGTGGCTGACCGAAGAAGATGTCAATTATTATGCCAGCAAAT
GmaAffx.89772.10.S1_s_at	CK606097		1.1e-53	Disease & Defense			AGGCTCTTGATTCCTTCAAGAGTGTTGAAAACGTTGAGGGAAATGGTGGCCCNGGAACNATCAAGAAGATNACTTTCNTTGAGGATGGAGAAACCAAGTTTGTNCTGCACAANATAGAANGCNNTTGATGAGGCNAACTTGGGATANAGCTACAGCGTNGTNGGNGGTGCTGCNTTGCCAGACACNGCGGAGAAGATCACATTCNACTCCAAATTGGNTGCTGGTCCCAATGGAGGNTCTGCTGGNAAGCTCACTGTCNAATACNAAACNAAAGGAGATGCTNAGCCCAACCAAGACNAACTCAAAACTGGAAAAGCCAAGGCTGATGCTCTCTTCAAGGCCA
Gma.3108.1.S1_at	CD409593	At1g29850	1e-41	Disease & Defense			AAGATTTTATATTGAGAGCTGCTCAGATGGGTCAGATAACTGAAAAGGTTTCTGAGGAAAGACTCATATCACTGTTGGAGCAGATAAACAACCAAACAACAAGGCAGACAAAAGTTACAATACAGAGGCGTCGAAGTGTTCTTGAGGATGATGATTAACTTTCACTGTCTCTTTAAACGGTGTGCCTTGAGTATTGATTTCATGCTTTATTATATATTTTACTAAGTATTGTATAAGTGGATTGAGAAATATATCTGTTTCAGATTGAAATTTTGGTTGCCTTGCCAGGCCTCCTAATTAAAATACTT
GmaAffx.91519.1.S1_s_at	CF807244	At1g29850	5e-24	Disease & Defense			TGAGTTGGAAGCAATCAGACAGAGAAGGTTGCAGGAGCTTATGGCTAGCCATGGTGGCGGAAATCAACAGAACCCTGAACAGGAGAAAGCTCAGGATGATGCAAAGAGGGAGGCTGAGGAACGGAGACAGATGATGCTTAGTCAGATATTGGCTGCTGAAGCGCGAGAAAGGCTTGCTCGAATTGCTTTGGTGA
Gma.6315.1.S1_at	BE822317	At5g26990	2e-58	Disease & Defense			TATGTCCTGTTTGTGCGTTGAGGGTGGGGGTTGATATGGTAGCACATATAACCCTACAACATGGGAGTATATTTAAGATGCAGCGCAAGAGGNAATCACGGAAAGGTGGATCTTATTCAACACTATCTTTATTGAGGANNGAACTGCGAGAAGGAAATTTACAATCCCTTTTTGGCGGATCTTCATGTATAGTGTCCTCATCCAATGCAGATCCACTGTTGTCATCATTTATATTGCCTTTAGCGAATGAACATGCCAGCTCTCAGCCTCACTTACACACTGAGACAAGATCATCTAAAAAATGCTCAGATGAGACTGTATCAACAAGAAATGTGGAGACATCAACCTTGTCAGTTAAGGATAAGGAGGAGAAGGCAAAAAGATGCGAGTTTGTTCAAG…
Gma.10757.2.S1_s_at	BG650239	At3g16920	1e-138	Disease & Defense			TGCTCATGATGCTTTTGTCGGCAGCTGGAAGCCTACCAAGAATGACACTATGGAGAATCGGGTTCCTGG
Gma.6075.1.S1_a_at	AW317183	At3g11660	8e-74	Disease & Defense			TTGGTTCAACGCTGCACCGTCGGGGTTTGATGT
Gma.3749.1.S1_at	CD392491	At4g24280	6e-43	Disease & Defense			TTACAACCAGCCGGGAGCTGCAGGTGCAGGAGGGCCAACACCACCTGGTGCCGACTCTGGCCCCTCAGAATCCTCAGGTAAGGGACCCGACGGAGATGTCATCGATGCAGATTTCACCGACTCTAAATGAGCAGCAGCCAGCTAATTACACCCATAGAGAGTATATGTTAGTATTTTTTNCCCCGTTATATGTTTTCTTCTGTTCCAAATTCTTAATGATTTTTGTCAATGGAGAGTAGGTGTGTGTTTCCTTCAAAAATTAGACACGGATTTCATAGGTGCTCATTGATGCTCGCTTTGTACCNTGGAATTTTGTCTCAGTAACACTGGTATTATTATGGGTGCAATTCATTTTATA
Gma.4312.3.S1_a_at	BF424240	At2g31570	5e-43	Disease & Defense			CATCTACTCCTTCCCTCATGGCTGAGCAATCTTCCAAGTCCATTTACGATTTCACAGTCAAGGACATCAGTGGAAATGATGTGAGTCTGAATAATTACAGCGGGAAGGTTCTACTGATTGTGAATGTCGCCTCACAATGTGGTTTGACACAGACAAATTACAAAGAATTGAATGTATTGTACGAGAAGTAC
Gma.4312.3.S1_at	BF424240	At2g31570	5e-43	Disease & Defense			GCAACACCGCGATATGAACGATGCAAAATAGTTTCAGATACGTCGCGTTGATTGATTGATATGAAGTGGTTGACTTTCTGGAACTGCATATCTATCCTCGTGTTGTCTTTTGCTTTCTTC
Gma.4312.1.S1_x_at	BM523337	At2g43350	3e-74	Disease & Defense			GTGGTTTGACACAGACAAATTACAAAGAATTGAATGTATTGTACGAGAAGTACAAGAATCAAGGATTTGAAATCTTGGCATTTCCGTGCAACCAGTTTGCTGGACAGGAACCAGGAAACAATGAAGAAATTCAGGAAGTAGTTTGCACAAGGTTCAAGGCTGAATTTCCTATCTTTGATAAGGTTGAAGTCAATGGGAAGAATGCAGTGCCACTTTACAAGTTTTTAAAGGAGAAGAAAGGGGGAATATTTGGCGATGGTATCAAGTGGAACTTCACAAAGTTCTTAGTAAACAAAGAAGGGAAGGTTGTGGACAGATATGCACCTACCACCTCACCTCTGAAAATCGAGAAAGACATCGAGAAGCTCTTGCAATCTTGAGTACTAAGATTTTATTCTA…
Gma.4312.2.S1_s_at	AI939064	At2g43350	3e-36	Disease & Defense			GTTTGCACAAGGTTCAAGGCTGAATTTCCTATCT
GmaAffx.89649.1.S1_s_at	CK606251	At2g43350	6e-47	Disease & Defense			TATCTTTGATAAGGTTGAAGTCAATGGGAAGAATGCAGCGCCACTTTATAAGTTTTTAAAGGAGCAGAAAGGGGGAATATTTGGTGATGGTATCAAGTGGAACTTCACAAAGTTCTTAGTAAACAAAGAAGGGAAGGTTGTGGACAGATATGCACCTACCACCTCACCT
GmaAffx.65968.1.S1_s_at	BE608057	At4g31870	1e-19	Disease & Defense			ACAAGACCCAGGCAGGTGTCGCAGTACGCGGAGAAAGGACGCTATATAAATATATTTGTCCCCGATGCTCTCTATTTCAGCCACTCGTATATTCTTCCTCCGCTCAACAACTATAAGATTATCTTCTTCTTCTTCTTCTCTTCAATTCTTCTCCAATCCCAACCGCACCCTCTTCCGTCCCTTTCTTCACACTTCCTTCAAACCACTTCCTTCGTCTTTCTCTTTCCGAACAGATCACACTATGGCCACCTCAAACGCCAAATCAGTCCATGATTTCACCGTTAAAGATG
Gma.16720.2.A1_at	CF921114	At3g09270	1e-22	Disease & Defense			GTCAAGAGTTTATCAATCACCCTGTGATCAAGGAGGGCCTGCCTCCTAGAGATGAATTGTTTGCTTTCTTCCAAGCTTCTGCTAAAAAGTAGAGCCGTTTTAGAGGTAGGATTCCTAATAAGTTAGCATGATTTTGTTGGGAAATAATGATAATCTTGTTGTGAGTAAAAGATTGTTCTGTTTTAAATTTAATTGACTGTGGTATTGGTTGAGGGTATTGGCTATTTTAATTTTAACTATAAAAAACTGGTGTTCTGTGTTGTTGCCTGATTTCTCAACNAAATTGAACCAAGCTAAGAAGTTGCCCGAATGGGTGTGCANTATAGGATTTTGGTGCAAGAGGAATGAGTGTTGTGCTTAAACCTTTCTTCATTATTAATGTTCCTATCTCCCCCATCT…
Gma.8518.1.S1_at	AF243362.1	At3g09270	1e-65	Disease & Defense			GTTGAAGAGTCATATGAGGCTCTGCAGTTTCTTGAGAATGAGCTGAAGGACAAGAAGTTTTTTGGAGGAGAGGAAATTGGGTTGGTAGATATTGCTGCTGTCTTCATAGCATTTTGGATCCCTATAATTCAAGAAGTATTGGGTTTGAAGTTATTCACAAGTGAGAAATTTCCTAAGCTCTACAAATGGAGCCAAGAGTTCATCAACCACCCTGTTGTCAAACAAGTCCTTCCTCCTAGAGATCAACTTTTTGCCTTCTACAAAGCCTGCCATGAAAGTCTTTCTGCTTCAAAATAGACTTATTTAAGGATAGTTGTGTGAACTACTGGTCTCTCATTTGTGAGTTATTGCAGTTTGAATTTCATGTCAATTTGGTTTTATATGTAATTTAGTAACCTG…
GmaAffx.24201.1.S1_at	BQ740972	At1g05170	2e-98	Disease & Defense			CTGCTGAGAGGATTAAAGAGGTACATAGGAGGTGTGGAGAGGGTGAGAATGCTTTGTGGAGTGCCTCTTTCTAGGGGGCAAAAAAGTGACAGTGGAGTNCTTCCTAACTCAGGAAGATTAATACCAAGGCAATATGAGTCAACCCTGCAAGATTTTCTATTTTTCTTTTTCTTTTTCTATAGTTTTGTGCAGTGTAGAGAAAAATGTCATTTTACACGAGAAAAGCAGGAGTGAAAGAGAGTGTGTGAGAGAGAAATATGATAATGCTTGCCCCATGGACCTTCAACATTTTAAGAGGAGATTGACCATGGGAGCAAGAGATCGATAT
GmaAffx.71331.1.S1_at	AW597101	At1g53290	5e-29	Disease & Defense			AATAATCTTGAACTTTGTGCTCGAGAGTGCACATCCACGTCAATTGCTGTGTGGGACATTCCAAAGTGTTCAGGTCTCTGTAATCCAGAAAAGAGAATGTTGGAACTGCATCAAAAGGAAAGTTGTACTCAGAGTCCAACTGTGGACTCTGATGAATAGTATTTGTTTGTATATTTATGAGGCGAAGGTGAATTGCCTGCTCTTGTTATGTTTAACTTCCGTGAGCAGCTACCATTGCATCCTTTTCTATCCATTGATCTTTCTCTTTTTGA
Gma.2590.1.A1_s_at	CD406617		0.0001	Disease & Defense			GGAGGCAACCACCATTAACGAGCTGAAGAAGCCTGTTGTGGAGAAAGAAGCTCCAGGGCATGCCATATGAGGGCATGCACGTACGGCCT
GmaAffx.57668.1.S1_at	BM567837		1e-07	Disease & Defense			GGGAAACACACATGCCAAGTTCGATGTCATCATTAACGCCGATGATTATAACGAAATCCGCCCCGATCACGCCGAGTTTGCAGGAAGCTTTGCGAGTCTGCCTCACTCAAATAACAAAAAGATCGTTACTTCCATGAGTCTGGGATTAACGGATTTGTTGGAAGATTTGGGCGCTGACGATGATGACAGTGNNNTCGTCACGCTCGTTCCCAGGGATGGACGTGTCAAAATCAGAGCCATCAAGACACGGCTTCTTGCAGAGTGAAGGAAATACTTATGCATATAAATAAATTTGTGGGGTGTAATACTTGTATTATAGGTTAATTTTGTTACTGCTTTTTAAATTATGGAGACAATTTATAATTGTGCTTGTATTTTATATTAAGAAAAATTTAAAAG…
Gma.4077.1.S1_at	CD414118		0.0005	Disease & Defense			ATTGCAAGCATCATGGCTGAGGAGAAGCACCACCACCACTTNCACCACCACAAGGGCGATGATGTGCCTGGCGAGGTTGATTATAAGAAGGAGGAGAAGCACCACAAGCATCTTGAGCACCTTGGGGAACTTGGTGCTGCNGCTGCCGGTGCTTATGCCTTGCATGAGAAGCATGAGGCCAAGAAAGACCCAGAGCATGCTCACAGGCACAAGGTAGAAGAGGAGATTGCGGCAGCAGCTACTGTTGGTGCTGGTGGTTTTGTCTTGCATGAACACCATGAGAAAA
GmaAffx.46214.3.S1_at	BM094597		1.1e-94	Disease & Defense			GACTTCAATCTCGAGGATCCTATTTCCAATGGNAAAATTTCCAACAACCTCACCATAATGTATAGGCAAGTTGTGTCTAANGGGAAGACTCCTACNTTGTTCCTTGGAAATCCTTACCGTGCTGGGGATGAGCCTGACCCGGGTTTTGGATCAGTAGAGAATGTTCCACATGGCCCTGTTCATCTTTGGACCGGTGATATCAACCAACCTAACATTGAGAACATGGGAACTTTCTATTCAGCTGCAAGAGA
GmaAffx.52146.1.S1_at	CA934966	At3g04720	2e-46	Disease & Defense			TTTGCATTCTGGCATTGGCCTCTGCTCAGAGTGCTACAAATGTGAGAGCTACTTATCATTTGTACCAACCTGAGCAGCATAACTGGGACTTACTCGCAGTCAGTGCATATTGTTCAACTTGGGATGCTGACAAATCCTTGGCATGGCGCAGCAAATACGGTTGGACAGCTTTCTGTGGACCCTCTGGGCCTCAGGGCCAACAATCTTGTGGCAGGTGCTTGAGGGTGACAAACACTAGAACAAACGCTCAGGAAACGGTGAGAATTGTTGATCAGTGCAGCAACGGGGGCTTGGACTTGGATATTGGTCCGTTCCAAAAGCTGGACACTGACGGGAATGGCATTGCTCAAGGCCATCTTATTGTTAACTACGA
GmaAffx.92986.1.S1_at	CF808711	At5g02790	4e-77	Disease & Defense			AACGTGTGTGGATCGCTAGGAACTACAAGGGGCTACAAGATAAGATCAATTTGGT
GmaAffx.92986.1.S1_s_at	CF808711	At5g02790	4e-77	Disease & Defense			TTGTACATCAGTTATTCTTGCCCCTATGCACAACGTGTGTGGATCGCTAGGAACTACAAGGGGCTACAAGATAAGATCAATTTGGTCCCTATTAACCTTCAAGACAGGCCAGCTTGGTATAAGGAGAAAGTCTACCCTGAAAATAAGGTGCCATCCTTGGAGCACAATGGCAAGGTGTTGGGAGAAAGTCTTGATTTGATCAAATATGTAGATGCAAACTTTGAAGGGACACCTTTGTTTCCCAGTGATCCTGCCAAGAAAGAGTTCGGTGAGCAATTGATATCCCATGTTGATACATTCAGCAAAGACCTGTTCGTTTCATTGAAAGGGGATGCTGTACAGCAAGCCAGTCCCGCTTTTGAATACTTGGAGAATGCTCTTGGTAAATTTGATGATGGG…
Gma.4604.1.S1_at	CA802306	At4g14710	5e-94	Disease & Defense			ATAAAGGGTCCTGGCTTGTTATGCCTTGATGTACCCTCGCCAGTGTTTTTGTTGCCTGTCCCTGTATAAAGATTGCATTGTATTATTATTAGAATTGGGTACAGAATAAACATAAGCATATGTTAGTATGCTGATGTATATTTATG
Gma.4604.2.S1_at	AW317203	At4g14710	3e-93	Disease & Defense			GATTGCAATGATGCTTGGATTCGAGTGTGGGTCAAGAAAGGAGGAATGATCATCTTACCTGCTGGAATTTATCATCGCTTTACACTAGATGAGAGCAACTACATTAAGGCTTTGCGTTTTTTTGTTGGTGAGCCAGTTTGGACTCCACACAATCGTCCAAATGACCATCTCCCTGCAAGACAACAATATGTCAAGGATTTTGTGGAAAAGGATGTTGGCAACCATGCTGTTGATGCCGCCGCGTAAGATCTGGTTCCGCCTAATCGTAGTACGTGGGACTGAGACTTTGTGTTGCTAAAGTAAGGTTTGAACAAATGAAAATAATGGTGCCTTTAAATAAAGGGTCCCAGCTTTTTATGTTATGGTTTTTGTGTAGATGACCCTTTAAGCCTTTTACCC…
Gma.5141.1.S1_at	BI971102	At2g30210	3e-42	Disease & Defense			GAGGATCACCCTATGCATATTCATGGATTCCACTTCTTTGTAGTTGGTTCCGGCTTTGGCAACTTCAACCCAGCAACAGATCCTGCAAGGTTTAACCTTGTAGACCCACCTGTGAGGAACACCATTGGAACACCACCAGGAGGATGGGTGGCCATTCGTTTTGTGGCTGATAATCCAGGAATTTGGTTCTTGCATTGTCACATAGACTCACATCTGAATTGGGGTCTGGCAACGGCACTTTTGGTAGAGAATGGAGTTGGTCCATCACAGTCAGTTATTCCTCCACCCCCGGATCTGCCTCAGTGTTAAGATCAACAAAGCATCATTAGTCATAAATTTTATGTTCCTCAATTATTGGCTTGTTGTTTTACGAGGTCTTTAAATACTTGCTAAATAGAC…
GmaAffx.93393.1.S1_s_at	CF808604	At3g09640	4e-74	Disease & Defense			TCTTGACATCGCTGTTAGGCTTTTGGAGCCACTCAANGCGGAGTTNCCTATTTTGAGCTACGCCGATTTCTACCAGTTGGCTGGCGTTGTTGCCGTTGAGGTCACNGGTGGACCTGAAGTTCCNTTCCANCCTGGAAGAGAGGACAANCCTGAGCCACCACCAGAGGGTCGCTTGCCCGATGCCACTAAGGGTTCTGACCATTTGAGAGATGTGTTTGGCAAAGCTATGGGGCTTANTGACCNAGATATCGTTGCTCTGTCTGGGGGTCACACTATTGGAGCTGCGCACAAGGAGCGTTCTGGATTNGAGGGTCCCTGGACCTCTAATCCTCTTATTTTCGA
Gma.6091.1.S1_at	AW310762	At4g35000	1e-102	Disease & Defense			TTTGATGGCCCTTGGACGGAGGACCCTCTGAAGTTTGATAACTCATACTTTGTGGAACTTTTGAAAGAAGATTCTGCTGGGCTGCTTAAACTTCCAACAGACAAGGCTTTATTGGAGGATGCTGAATTTCGCTGTTATGTTGAGCTATATGCAAAGGATGAGGATGCATTTTTTCGAGATTATGCTGAATCACATAAGAAACTTTCAGAGCTAGGCTTTGTGCCAAGTTCAAAGCCGATTTCTATTAAGGAAGGGACCATACTGGCACAAGGTGCTGTAGGAGTTGTAGTTGCTACCGCAGTGGTGATCCTCAGTTACTTGTATGAAGTTCGCAAAAGAGGGAAGTAAACTGGATTTGTTCATCTCTTGGCTGTTACGGTTGCGTGACCCTGACCCTGA…
Gma.3063.1.S1_s_at	BU549226	At3g09390	9e-09	Disease & Defense			TGAGGTGTTGGAGAGCTAAAGCTTCAAGCAGAAATGGCCCTTAGAAATAATGATAAAAACTATATGTAGTTTCAAAACTTCAAAATTATGTAGTATGTATTATGTTGCACTCTGGTGTTTTGTGTCTAAACAAACACCCTTAGAA
Gma.3118.1.S1_s_at	BQ786048	At3g09390	0.005	Disease & Defense			AGTACTCTTTTGACTTGAGTTACGTTGAGAAGACAACCACAGAGACTCTAGTTTTGGGTGTTGGGCCTGTGAAGGCCCAATTGGAGGGTGCTGAAATGGGTGTTGCATCTGAGAACGGTGGCTGCAACTGTGGATCAAGCTGCACCTGTGACCCATGCAACTGCAAGTAAGGTCAAGATGTATAACCTTGAAGCAGAGATAGCTGTAATATATGTATCAACAAATAATAAGAAGTAGAAGTTGCGTTTGGAGCTTTAGAATAAAGTGTTTGCTATGTGTTTT
Gma.6299.2.S1_at	CD397742	At1g04340	2e-32	Disease & Defense			TTGATGCCCGGCAATTCATTGCTACNATCATATTTCTTAAGGGGGTNGGAGGGATTTTGTTTGTGTTTGGNAGCACATTTGGATCTTTCNTACTGCTTTTGCATCTGGCNATTACTACTCCACTTCTGTACGATTTCTATAANCNATAGNCCCGGCAAGCCTAAGTACAATCAGCTGCTGAATGATTTCTTGCTGAACACAGCACTTTTTGGGGCATTGCTATTCTTTATTGGAATGAAGAACTCAATTCCCAGGAGTCAGCTCAGGAAGAAGACCCCTAAAGCTAAGACAGTTTAGAAAAAATAGAGCANNNGATGTATTAGTGTGCCAAAATGCTTAGTTTCGGCATTAAGTATTTGATCTTCAGCTGAGTTTGGAATAGTTACTTAGACCTATTAA…
Gma.10658.1.A1_at	CA852384	At1g70890	1e-22	Disease & Defense			GAGTCGATCAAACACTGGACTTGTACNANAGATGGTAAGATTACAACATGTCTGGAGAGTATTGAATCCGTTGATGAACCGAACAAAACAATCACCTACAAGCTCTTCGGAGGAGATATTGGTCATAAGTATAAAGTCTTTAAGCTCATTTTTCAAGCTATTGACACCGATCATGGGGGTGTTATTATCAAATGGACCGTTGAATATGAGAAGATTGATGAGAATGTTGATCCTCCGTATGGCTACATCGAATACCTGCACAGTGGCAGTAAACAGATTGATGGCAATCTTCTCAAGCCATAGCTCCAAAAGTTATGCAGAAAATAATTAATAAGTAAGAAATAATTGGCTTGGCCTTAGAATATATAGTGCTTGTCTAGTTATCAGTATAAT
Gma.8957.1.A1_at	BU764905	At1g70890	3e-34	Disease & Defense			TAATATCATACAGCCTCTTTGATGGGGAAATCAGTGAAGGTTACAAGAGTTTAAGGGGCACATTACAAGTGATTAATAAGGAAAATGGAGGAATTGTGAAATGGACCTTCGAATATGAAAAGCTGCAGGAGAATATCACTGCTGCATCTCCTGATTCTTTTTTGGACTTTGCTGCTAAGGTCACTAAAGATATTGATGATCATCTTGTCAAGGCATAGCAAGAAAAAAAAAGAGTGTGTGATTGGTGATGAAGTGGGTTTGGCTAGAGTTTTAATCCTTATTATCTAAATAAAAGCATCATTTAGTAAACTTTGGAATGCCGGATGTGTAATAATGATATATATGCTTCTTAGTGTTCCTTGTTTGTGATAGAATGCATGGATATGATGTTTGTTCGTT…
Gma.9010.1.S1_at	CF921194	At1g70890	1e-23	Disease & Defense			GATAAGGATCAAGGCGGTGCTTTTATTAAATGGACGGTTGAATATGAAAGGCTTGCTGAGGAGGTTGATCCTCCATATGGATACATCGAATACCTGCACAAATGCACTAAAGATATTGATGTTCATCTTCTCAAAGCATAGCTCTAAAAGTTATGCACTAAGAAATAATGGGCTTGGCCTCTGGATAAGTGCTTATATGTATAATAATCGGTGTGGAGTTTGACGAGAAGGATGCTTATATAGATCCTTCCTTTGTATGGAATAAACTTGGATATGCATGTCGGTGATGTCTTGTATGTGTTAAATTATATATGTGGAAGTGCTCAACGTGATACATATGAATATTAATGAATGTTTTATGATCGATTTTGCTA
GmaAffx.90331.1.S1_s_at	CF806056	At1g70890	4e-23	Disease & Defense			AATAAAATCGGTGTGAAGTTTGACGAGAAGAATGCTTAGTTATGTAGAT
GmaAffx.36484.1.S1_s_at	BI425441	At2g14580	2e-50	Disease & Defense			GTAAAGGTGATTGTCAACTGATCCACTCTGGTGGTGGTGGCCAATACGGGGAGAATCTTGCTATGAGCACTGGTGACCTAAGTGGCACAGATGCAGTGAAATTGNGGGTTGATGAGAAGTCTAACTATGACTACAATTCTAATTCCTGTGTTGGTGGAGAGTGTCTGCATTACACTCAGGTTGTTTGGAGAGACTCTGTGCGTCTTGGATGTGCCAAAGTAGCATGTGATAATGGAGGCACTTTCATCACTTGCAACTATGCTCCTCCTGGCAACTATGTTGGCCAAAGACCCTACTAGGTTGTTACATTTGTAGCAGCGAGATGGCTACCATTTAAGATGATGAGTTATATACCATACATATTAAGAATAAATAATAGCATCATGAATTTATATAGAT…
GmaAffx.42847.1.S1_s_at	BU578388	At2g14580	3e-49	Disease & Defense			GATTTCATTATGTCTATTGTGTGTGTTGGGGTTAGTCATTGTGGGTGATCATGTTGCGTATGCTCAAGACTCACCAACAGACTATGTTAATGCACACAACGCTGCAAGATCACAGGTTGGTGTTCCAAATATAGTTTGGGATAACGCAGTCGCTGCTTTTGCACAGAACTATGCTAACCAACGCAAAGGTGACTGCAAACTCGTCCACTCTGGTGGTGATGGAAAATACGGGGAGAATCTTGCAGGAAGCACCGGTAACCTAAGTGGGAAAGATGCAGTGCAATTGTGGGTGAATGAGAAATCCAAGTATAACTACAACTCCAACTCGTGTGTTGGTGGGGAGTGCCTGCACTACACTCAGGTCGTTTGGAGAAACTCTTTGCGCCTTGGATGTGCCAA…
GmaAffx.88845.1.S1_at	CK605838	At2g14580	3e-48	Disease & Defense			TAACATGCAAGCATAGCATCATGAATTTAGCCAACGACTTTAAATTCGTGTTGTAATACTTTTCAATGTAT
Gma.17993.1.S1_s_at	BQ628525	At4g11650	2e-79	Disease & Defense			TGGACTTTAGTCCAACCTCGAATGGATGCACACGTGGCATAAGNTGCACTGCGGACATTAACGGACAGTGCCCTAGTGAGCTAAAGACTCAAGGAGGTTGCAACAACCCTTGCACTGTCTTCAAAACCGACCAGTACTGTTGCAATTCCGGTAGCTGTGGGCCCACTGATTATTCCAGATTCTTCAAGCAAAGGTGCCCCGATGCTTATAGTTACCCCAAGGATGATCCAACTAGCACCTTCAC
Gma.2821.2.S1_a_at	BI469945	At4g11650	4e-69	Disease & Defense			GACGCGGGAAGTGCCTCACCGGCGACTGCGACGGTGTTCTTGAGTGCAACAAAACAGGTACACCTCCGAACACGTTGGTGGAATTCGCGTTGAACCAGTACAACAACCTCGACTTCTACGACATCTCCCTCGTCGACGGTTTCAACATTCCCTTGCAGGTGAGCCCGACCTACAACTGCAGCTCCGTGAAATGCGCCGCCGACATCATCGGAGAGTGTCCCACTCAGCTTCAGGTTCCCGGCGGCTGCAACAACCCGTGCACGGTTTTCAATACGACTCAGTACTGTTGTAGCACCGG
Gma.2821.2.S1_at	BI469945	At4g11650	4e-69	Disease & Defense			ACAGGTACACCTCCGAACACGTTGGTGGAATTCGCGTTGAACCAGTACAACAACCTCGACTTCTACGACATCTCCCTCGTCGACGGTTTCAACATTCCCTTGCAGGTGAGCCCGACCTACAACTGCAGCTCCGTGAAATGCGCCGCCGACATCATCGGAGAGTGTCCCACTCAGCTTCAGGTTCCCGGCGGCTGCAACAACCCGTGCACGGTTTTCAATACGACTCAGTACTGTTGTAGCACCGGTGCTGCGGGTTGCGGTCCCACTGATTATTCCAAGTTCTTCAAGGAGAGGTGTCCAGATGCCTTTAGTTACCCTATGGATGACGCAAGCAGCATGTTCACTTGCATGGGAGGATCTGATTATAGGCTTGTGTTTTGCCCTTAATTAATTCATCAT…
GmaAffx.91091.1.A1_at	CF806816	At4g11650	1e-78	Disease & Defense			GAACCCAATAACCTCTTCTATTACGGACACTGAAATAAAAT
GmaAffx.92699.1.S1_s_at	CF808424	At4g11650	2e-13	Disease & Defense			AATAACTGCACCTACACGGTGTGGGCCGCTGCCGTGCCCGGCGGCGGCGCAAGGCTTAACCCTGGCGAATCGTGGAACATCAGCGT
Gma.9839.1.S1_at	CA935357	At2g28790	4e-52	Disease & Defense			CACGGACCCGTGGTGGCTTGCAAGAGCGGGTGCGAGGCTTTTCACACGGACGAACTCTGTTGCAGGAANCACTTCAACAACCCTAACACGTGCAAGGGATCTATCTACTCCTCCTTCTTCAAGCACGCGTGCCCTGCCACCTTTACATTTGCTCATGACACCCCCTCCCTCATGCACCAGTGTTCCTCCCCGCGTGAGCTTAAGGTTATCTTTTGTCATTAATATTAGGGACCAACTACTAAGCTTTCTTGTGTTAAGAAGCCGTTTGGGTCATTGTTAAGTGACTCGACTCTTGTCTTTTCTAATAAGATTCGAACAAAACAGAAATGTAGTAGTCGTGTGTCTTTGTAATTTC
Gma.413.1.S1_at	BQ611370	At1g71695	1e-77	Disease & Defense			ATGCTACTATAAAGTTGAGTCAATTGGATGTGCTCACTGGA
Gma.413.1.S1_s_at	BQ611370	At1g71695	1e-77	Disease & Defense			GGACAAAACCCTAGCCAAGCAACTACAATCCACTTGCCCCGACGCAAACTCCGGCAACACCGCCAACTTGGACATCAGAACCCCGACTGTGTTCGACAACAAATACTACCTTGACCTAATGAACCGCCAAGGGGTGTTCACCTCTGACCAGGACTTGCTCAATGATNANANGACNTAAGGGGTTGGTCAATGCATTTGCGTTGAACCAAACGTTGTTCTTTGAGAAGTTTGTGGATGCTACTATAAAGTTGAGTCAATTGGATGTGCTCACTGGAAATCAAGGTGAAATTCGTGGCAAGTGCAATGTGGTGAATGCTAGGAAGTCTTTGTTGACGTCTGTGGTGGAAGAGGTGGTGCAATTGGTTGATCAGTTTTGAATGGAGCAAAAGTTTGTAAGTT…
Gma.6477.1.S1_at	AW309863	At1g71695	8e-79	Disease & Defense			TCTGACCAGGACATCGCGGGCAGCCCCAAAACCAAGGAAATCGTGAACCAGTTCGCTTCAGACCAGAAACTGTTTTTTAAGAAATTTTCCGATGCTTTTGTGAAGGTGAGCCAGCTAGATGTGATAACGGATCGTATTGGGAAAGGGGAGATTCGTGATAAGTGCTTTGTTGCAAATAAGAGAAGATCTTCTATGGCGTCTGTGGTGGAAGAAGTAGTGGAATTGGCTCAGGAGATATAATTGTATTGGGTCCTTTTGCTCAGGGTGTTCTTTTTTGTTTTTCTGAATGGATTGTGTAATAAACGTTGATATGTGTTTTCTTTTCTTGTTGTCTTCTCATAGATCATTGCTTTGGATTGGTTCAAAGTTTAACCAGTATAACATNNACAAGGCAAAAGT…
GmaAffx.16271.1.S1_at	CA936304	At2g37130	1e-128	Disease & Defense			GAACATCTTGCAACACAAGGGTCTTCTNANTGTGGATGAAGAGCTTGCCACTGACCCAANAACNGCANCTTATGTCCAAAAGATGGCCAANGACAATGANTATTTCAACCAACANTTCTCAAGGGCCATNNTTTTGTTNTCNGAGACNAATCCTTTAACAGGAGATGAAGGNGAAATCAGAAAGGATTGTCGCTACCTCAATGCCAATTAAATATATAACATAAGGTTGCCCTTTGTGCATGATAATATGTATAATTAGCATAGATTATAATGCACGAGTGCGCCAAAATAAACGGGTGGGACGTACTGGGCCTAGGTTACCATATTCAGTGCAATACGCCATTGGGCCTAGCCTTATGTATACGCTTATGTTTGGGCTTTTACTTCCTGCACGTTCCC…
GmaAffx.88993.1.A1_s_at	CK605690	At2g38380	3e-36	Disease & Defense			AACCACTCCTGATACATTGGACAAGAACTACTACTCCAATCTTCAGGTTAAGAAGGGTTTGCTTCAGAGTGATCAAGAGTTGTTCTCAACACCTGGTGCTGATACCATCAGCATTGTCAACAAATTCAGTAGTGACCAAATAGCTTTCTTTAAGAGCTTTTCGGCTTCCATGATTAAAATGGGAAATATTGGTGTGCTAACTGGGAAGAAAGGAGAAATCAGAAAACAATGTAACTTTGTTAACAAGAAATCTGCGGAACTTGATATAGGTAGTGTGGCATCCGAATCAGAAGAGGGTCTGGTTAGCTCAATATGAATGAATTAGGAAGAGTTTTATATACACTAGGAAATCATGTGATTGAAGGTTACCAATAAAGAAGCTATATATAGGCACATTAT…
Gma.12498.1.S1_s_at	BQ611770	At1g05260	1e-112	Disease & Defense			CCTGGAAGTCGCAAGACATTTGATCTTAGCTACTATAGTCACGTTATTAAGAGAAGGGGTCTATTTGANTCAGATGCTGCATTNTTGACTAACTCAGTTACAAAGNCNCAAATCATCCAATTGCTTGAAGGGNCAGTTGAAAATTTCTNTGCTGAGTTTGCAACCTCCATNGAGAAAATGGGAAGAATTAATGTGAAGACAGGGACAGANGGAGAGATCAGNAAGCATTGTGCATTNNTAAATAGCTAAGAATCTTGTCTTGTTCATGGATGAATCT
Gma.16507.1.S1_at	AW101606	At1g05260	1e-125	Disease & Defense			GACAAACTCAGTTACAAAGGCTCAAATCATTGAATTGCTTGAAGGGTCAGTTGAAAATTTCTTTGCTGAGTTTGCAACCTCCATGGAGAAAATGGGAAGAATTAATGTAAAGACAGGGACAGAAGGAGAGATCAGGAAGCATTGTGCATTTGTAAATAGCTAAGAATCTTGTCTTGTTCATGGATGAATCTTGTATCATTTATTTTTTGGGTTTGGTTATTTATGCTATGCCATGTTTTTTTATTAGTTATGCTATGCCATGTGGTGTCTGTCTACATATGAGTGATCCCGTATGGTATGGTTGTTGTATGTGCGATGGAATAAGTGGGTTCCATTGTTATTCTTATAATTTCCAACTTTGCTGGTAGATCTTGTAATAAGAAGCAGAATTTCTTGTGC…
Gma.338.1.S1_at	AF145348.1	At4g21960	1e-148	Disease & Defense			CAAGGGTCTCTTGATAGTGGATCACCAACTAGCCAATGACAAGAGGACCAAGCCTTATGTGAAGAAAATGGCCAAGAGCCAAGACTATTTCTTCAAGGAGTTCTCTAGAGCCATTACCTTGCTCTCAGAGAACAACCCTCTCACTGGCACAAAGGGTGAGGTCAGAAAGCAGTGCAATGTTGCCAACAAGCACCATGATCAGGACCCTTGAATTTTCCTCCCCTTGTCTATGATCGAGGAAGAAAATCTGTAATATATTATGCAAAAAATAATTAAGGTCTTTTCCTTTAAATGGGCTGGTTCAATGAACCGAGACCACTGCAGGTTCATGGGGATGGGAGGATTAAGAGGCTATGTTTTTTAATCTTCCGATGTTACTGTTGTTTTTTTTTTAATTTC…
Gma.338.2.S1_s_at	AW569086	At4g21960	1e-110	Disease & Defense			ACAAGAACACTGCTTTCTCCTGGCTCAGGAACATCTTCCATGACTGTGCTGTTCAGAGTTGTGATGCTTCACTGTTGCTGGACTCCACAAGAAGGAGCTTGTCTGAGAAGGAAACAGATAGAAGCTTTGGGTTGAGAAATTTCAGGTACATTGAGACCATCAAAGAAGCTTTGGAAAGAGAATGCCCTGGAGTTGTTTCATGTGCTGATATCCTCGTTCTCTCTGCCAGAGATGGCATTGTTTCGCTAGGAGGTCCCCATATCCCTCTTAAGACTGGAAGAAGGGATGGTAGAAGGAGCAGAGCTGATGTGGTTGAGCAGTTCCTCCCAGACCACAATGAGTCCATTTCTGCAGTTCTTGACAAGTTTGGTGCCATGGGAATTGACACCCCTGGCGTCG…
Gma.4189.1.S1_at	AF039027.1	At4g21960	1e-151	Disease & Defense			CAACAAGCACCATGAGGAGCCTTAATTGCTTCCCGCTTAATTTGGGCCTTGAATTTTCTTCCCCTTCTCTATGTGGAAGAAATCTGTAAGATATTATGCAAAAAATAATTAAGGTGTTTTTCTTTAAATGGGTTGGTTGATTGGTTCAATGAACCGATCAAGACCACAGCAGGTTCATGGGGATGCGAGGATTAAGACGCTTTGTTTTTTAATCTTCCGATGTCACTCTTGTTTGTTAGTTTGTTTTTTTATTTTTTATTTCAATAAGTACTGTGCAAGTAGGTTAGAGTTGGGTAGAAGGGCATGTTCATGGTGTTAATTACTATGTTATGTATGCATGTGAGTGCTGCTATCGATGGCAAGATGTCAATGTATGCGTGTAGTGCTGTTATCGATGAG…
Gma.10936.1.S1_s_at	BI700784	At4g37520	1e-116	Disease & Defense			AACGTGGATCCTAGGATTGCCATCAACATGGACCCAACAACTCCTCGTAAATTCGACAATGTTTATTACCAAAACCTTCAACAAGGAAAGGGCCTCTTCACCTCGGACCAAATCCTCTTCACGGACCCAAGGTCTAGGAACACCGTTAATTCCTTTGCTTCCAGTACCAACGTTTTCAACTCCAACTTTGTGGCTGCTATGACCAAATTGGGTCGCGTTGGAGTTAAGACTGCAAGAAATGGGAAAATTCGTACCGATTGTTCTGTGCTTTAAGTTAAGGCTTTGGTTGATCATGTAAAGTCGCAAACAGTGCATGTTTTGGAGGTAAACAACAACACAAGTTGCAATTTTAGTGCGGGGGGATTTGCAAAGGGTAGTTAGATTCATTGTTGTTAATAA…
Gma.5971.1.S1_at	BQ610718	At5g66390	1e-110	Disease & Defense			GACCAGAATCTCTTTGTCCTAGACTTTGTTACCCCAATTAAATTTGACAACTTCTATTACAAGAACTTGNTGGCCAACAAGGGTCTCTTAAGTTCTGACGAAATTCTCTTGACAAAGAATNAAGTATCNGCGGATTTAGTGAAGCAGTATGCAGAAAACAACGATNTTTTCTTTGAACAATTTGCCAAGTCCATGGTTAAGATGGGAAACATTACTCCTTTAACAGGGTCAAGGGGNGAGATCAGAAAGAACTGCAGANGAATTAACAAGTGATGNAGTGATATCATTGTCATGTNNCACGTGTGANAGTTGCACCTACANTTTACTTTTCTTNNCTNTTGTTTACNGCATTAAAAAANAGGAGTGTCNATTGATCNATTCTGTGGTGAGTTGAGNAAG…
Gma.6640.1.S1_at	BQ628278	At5g66390	2e-62	Disease & Defense			GGGTGACCAGAATCTGTTCTTCCTAGACTATGCCACCCCATATAAATTTGACAACAGCTACTTCAAGAACCTGTTGGCCTACAAGGGTCTCTTGAGTTCAGACCAAGTCCTCTTCACAATGAACCAAGAATCTGCTGAACTAGTGAAGTTGTATGCTGAAAGAAACGACATTTTCTTTGAACATTTCGCCAAGTCCATGATCAAGATGGGAAACATATCTCCTCTGACGAATTCAAGGGGAGAGATCAGAGAGAACTGCAGGAGGATTAACGCTTGAAGAAGCAACAATCATTGCCATATTAATATATCATACACCAAGTCATGTGACCACATTTTATTTATGTTTCTTTTGTTTGTGCCCAAAATAATAAAAGCTGAGTTCATCATGAAGCCATTGCC…
Gma.6564.1.S1_at	BQ613091	At2g18980	7e-48	Disease & Defense			TCGCCAACCGACAGGGTCTGTTTACCTCGGACCAGGACCTGTTCGGTGATGCCCGGACTAAGGGAATAGTTAACTCCTTTGCTGAAAACCAGAAACTGTTCTTTGAAAAGTTTTCAAATGCTGTTGTTAAGTTGAGTCAGNTGGATGTGTTGACCGGGAAACAAGGACAGATTCGCGCCAAATGCTCCGTCCCCAACAAGAAGAAGGTGGTCACCTCTGTGGTGGAAGAAGAGGGAGTGGATTTAAGCGCTCAGATGTGAGATTAATTAAGGAATGTTTGTTTGTTAATAAATTAATGACCATGTTTCGTAGTAGACTAGTAATGTGATGTACGTCAGTTACATAAAAGGAGTTTCTCCCGTGTTACTACCTGCATTCCTGCAATCCTTAATTTCTATG…
Gma.17271.1.A1_at	AW310765	At2g38390	0.0002	Disease & Defense			GTCAACTAGTTGGATTGCAAGGTCTGGATTACAATAATGGCATATACAGTGGAAAGAATAAGAAACTGTATTGTTTTATAAGGTTAGTCATGTCAGTTTTTATTTTTGCTATAAAAAAGTTTAAGTGGGTTGGATTCGGAAACTTATCAAGACTCAATGAGTTTAAGTGAGTTGGATTCCGAAAAAGTTTAAGCCGTTGGGTTGAGATGCTGAGTTTCTATGTTAAGATTCAATTGTATTTTTATGTTGTATGTGTTGGTTTCAATCCAAAAGGAATTACTCTTTTCAAGTACTAAGCAACTTCATATGTATCGTGAATTGAACTCACATGGTTATTACATCGTTAACTTCTAAGCCCAATGTTATGCATGCAA
Gma.8144.1.A1_at	BU548599	At5g05340	5e-32	Disease & Defense			AAAGTCTAACTGTCCAAGCACTGGCGGAGACAGCAACCTTTCCCCACTTGATGTCACCACAAATGTTGTATTTGACAATGCTTATTTCAAGAACCTCATCAACAAAAAGGGGCTTCTACATTCTGATCAGCAGTTATTTAATAGTGGTGGTTCTACAGATTCTCAGGTCACTGCCTATAGCAACGACCCTTCAGCTTTCTATGCAGACTTTGCTAGTGCCATGATCAAAATGGGAAACCTTAGCCCCTTAACAGGGAAAAGTGGCCAAATTCGTACTAATTGCCACAAGGTTAATTGATTAATTACAGAAATAATATGAGCCAAAGACACGCTCATTCAGTCACAATACGTATGGCCTAGTTTATGTTTAGTGATAATAATCTAAGAATATAATATTGA…
GmaAffx.36514.1.S1_at	BE658341	At5g05340	1e-58	Disease & Defense			TTTCTCCAACAAAGGTTTTTCATCTAAAGAACTGGTTGCTCTTTCAGGATCGCACACAATTGGGCAAGCTCAATGTTCAAGTTTCAGAACAAGGATTTACAACGACACCAACATAGATTCCTCTTTTGCAAAATCATTGCAAGGAAATTGCCCTAGCACAGGTGGTGGCAGCACATTGGCCCCTCTTGACACCACCAGCCCAAACACCTTCGACAATGCTTACTTCAAGAACTTGCAGAGCAAAAAGGGTCTCTTGCACTCAGATCAAGAGCTCTTCAANGGAGGATCCACNGACTCTCAAGTAAATTCCTACAGCAGTAATCCTGCAAGTTTCNAAACTGACTTTGCCAATGCAATGATTAAAATGGGGAACCTTAGTCCNCTCACTGGGTCTAGTGG…
GmaAffx.40860.2.S1_at	BG509282	At5g58390	1e-08	Disease & Defense			CAGACTTTGCCAGTGCTATGGTCAAAATGGGAAACCTCAGCCCTTTAACAGGAAGCAGTGGCCAAATTCGTACTAACTGCCGCAACGTTAACTAAAAATTAATGGAGAAAATTAATCAATGAGCATTAATTGAGAAAATTAAGCTCGAGAATTATATATGCTCATCCAGTCACAATCTTTATGTGTTATGGTTTTAATTTCTTGGTGTATGGTGTGATACGTAGTCGGTTTATTTTTGTAGTTCTCCAAAAAATTTATGAACTGGCCAAATAAAGAGTGATATTATTCATCCAAAAAAAGAGAGAAAGTGTTGTTATTCTCATACCACTTTTTTGTT
Gma.5629.2.S1_a_at	BG042866	At5g64120	7e-14	Disease & Defense			GGACGCAGAGATGGACGCATATCACAGGCTTCCGACGTGAGTAACTTGCCTGCTCCTTTTGACTCTGTTGATGTTCAGAAACAAAAGTTCACAGCAAAGGNCCTCAACACTCAAGACCTCGTCACCCTTGTTGGT
Gma.5401.1.S1_s_at	AW351217	At1g60740	4e-61	Disease & Defense			ACAAGCATGTTAAGTTCCTTGCTGATGGTGCAGCCAAATACACCAATGCCCTNGGTCTTGAGCTTGACCTCACNGACAAGGGTCTCGGCGTCCGCTCAAAGAGGTTTGCTNTGCTGGTGGAAGACCTCAAGGTGAAGGTTGCNAATGTTGAAAGTGGAGGAGAGTTCACCATCTCCAGTGCTG
Gma.6287.1.A1_at	BI969411	At5g60920	1e-34	Disease & Defense			AGGGTCTACTTCAACGGTGACAACTGTGTAATGCCACCACCTGATTCTTATCCGTGGTTACCNAATGCTGGTGCTAGGCAAGAGGTTTCCTTGTTTNCTTTAGTGATAGCATCTTTGGTAGCCTTGGTATTTTATGCNCNCGCATAAAGTTTCAATCTGTGNNGTACANTTAGNCTTGTAATAGAAAATTTTCAGTCAGANCAGTTTTGACTCATCTNTGATGTCAATTTGGTATTTGAAGCATATGGGAGGATGACATCCAAGATTAGNTCACGTGTCCNATGATTTGTTACNAGAGGATTNACATTGGTGGTAGAATTTGCTATTGTTGTGTTTGTTGTA
Gma.4235.1.S1_s_at	U12150.1	At2g02100	3e-09	Disease & Defense			AATGGTGGCAGAAGCAAGAACTTGTGAGTCTCAGAGCCACCGTTTCAAGGGGCCATGTTTGAGTGACACCAACTGTGGCTCTGTTTGCCGAACCGAACGTTTCACTGGAGGACACTGCCGTGGCTTCCGTCGCAGATGCTTCTGCACCAAACATTGTTAATTTTAAAAAATTAATTAAGAGTGCTTTGATAGAAGATGATAGATCTATCATCTTTCTACTCGTGTTGTTAATTAACCACTTTGTGATATGAGAATAAGGGTTACCCATTCTACTATGGGTTTCTTTGTTTGCCTCTTATTTTATCTA
GmaAffx.11893.1.A1_at	CD414188	At5g60870	2e-08	Disease & Defense			GGATTAGGACCTCACAAAGTTTTATCAGTTGCAATTGGTGCATCACATGCCATGTGTTTAGCTTTGANNNNGAGTAGTTGATTTTGTCAGCTGACATGGAAATTTCTTCTTTGACTATAATGCCCCACTGAATTTTGTAAGAAGATCATTGAATTGTCGTGGTCTAATAGTGTATACCCTGATGGGTTACTAGCAGCATTTGTTCTTGGAGTCTAACACATCAAATTGACTATTCTGGATATACCAGAACTCCAGCGTTTACAGTTTGATTGTCCTAAAACCTGATTCC
Gma.18084.1.S1_at	BI317557	At1g09090	2e-64	Disease & Defense			GGAGATGCTAGGTCAGCTTTGATCACAATGCTTCAGTCTCTTCACCATGCCAAAAATGGTGTGGATATAGTTTCAGGGACAAGGGTGAAGACTCATTTTGCAAGACCCAACTGGCGCAATGTCTTTAAACATGCAGCCATCAAACACCCTGACCAAAGAGTTGGTGTTTTCTACTGTGGGGCGCATGGATTGGTTGGGGAACTGAAAAAGCTTTCTTTAGACTTTTCCAGGAAAACCAGCACCAAGTTTGATTTTCACAAAGAAAATTTTTAGATTCTTTTCTCAGTTTATTTATTATTATTTTTGGCAACTGTAGTTATATATAGTTGGATCATTTTTTGTTGTAGTGGGTGGTATATAGCTAGCTGCATTTGATACATGGAACTTACATGTATCNAA…
GmaAffx.59462.1.S1_s_at	BI469429	At3g60280	5e-20	Disease & Defense			AGGGTCTCTTCCATTCACAACCTTAAACCTTTCTTTCTTGTAAACTTTATTGATTGATTCTGAGAATAGAACTAAGAGGGTATAGACATGGCTAGCGCAATTGCAGCTTCTTTTTTGGTTCTGCTTCTGGCTTTCCCCACTGTATTTGGAGCTGACCATGAAGTTGGTGACACTAGTGGATGGGCCCTCGGAGTTAATTACAACACCTGGGCCTCTGGGAAAACTTTCACAGTTGGTGACACTTTGGTGTTCAAGTATGACTCCACTCATCAAGTTGAT
GmaAffx.83299.1.S1_at	BI701165	At1g17860	1e-20	Disease & Defense			GTGGTGACTGAGAATAATGATCCGTTATTGGTTCACTTTAAGAAAGTTGAAGTTGAATCATCAGCTACTGCTTGAGGTGGCCTTAAAAAATCATGTGGTTTCTCGTAGTGTAAG
Gma.6811.3.S1_at	AW459445	At5g58030	9e-98	Disease & Defense			ACGACCACGGACAACAATTTTGATAAAATTTGCTGAAGAGGTGTTACGAAGAGAAGCAAGATTAGGCTGATGCTTATACCAAGAATTTTCAATTAAAAATATTTTAATGCTGTACACCAATATAGAAAGATNTGGAACTTGCACCTATGGATNTGAAAAAGTAATTTAGGATTTTCACCAGCCTACCCTATTGATTTGTCAATTGAACTCATGCTTTTCATTCTAATGTATGTTCTGCTTTGGAGTC
GmaAffx.78614.1.S1_at	BQ611991	At3g52120	9e-07	Disease & Defense			TTACTGAACTTGACATTGGGTGCTTTGTGCAACTCTTCAGGAAAAGTTAACTTTTACAAAGTGGGATGAACTGGTGTGTTGATAGTAGGGTTTTTATTGTGTGCTGCAGTGCTTGTAGTCTTTTGAAACTAATATTTGGGGGAGAAAAGAGGGGGAAGGGGTAATGTTCACTTCAATCGCATTTTTATCCGCCAAAGAATAATGGGTTTTTGGTTATTTTTACTTGTCAGAGCTTTTGGAACATGTTTTTTGTATCGCAAGCATATTATGAAG
Gma.15464.2.S1_at	BG653526	At1g08830	2e-64	Disease & Defense			ATGGTTGCCTGTCAACTGGAGCGCATTTCAATCCTAATAACAACGAGCACGGTGCCCCTGAGGACGAGAATCGTCATGCTGGTGATCTTGGGAATGTTAATGTCGGTGATGATGGTACCGTTAGCTTCAGTATTACCGACAGTCAGATTCCTCTCACTGGACCAAACTCCATCATAGGAAGGGCTGTTGTTGTCCATGCTGATTCTGATGACCTTGGAAAAGGTGGTCATGAGCTTAGCAAAACTACTGGAAATGCTGGTGGCAGAGTAGCTTGTGGTATCATTGGTCTGCAAGGATAAACTAATCACATGAGGTTGGAACCGTGCTTTAGAATTGTGGAATAAAGTAGCACCCATTTAAACCCGTTTGGTTAGGTCCGGTCTGTGTACGGCTGAATTC…
Gma.6384.1.S1_at	BI968043	At2g28190	3e-69	Disease & Defense			TTGACACATGGTGCTCCTGAGGATGAAGTCCGTCATGCGGGTGACCTGGGAAACATAGTTGCTAATGCAGAGGGGGTTGCAGAGGCTACAATTGTGGATAATCAGATACCACTCTCTGGCCCTAATTCAGTAGTTGGAAGAGCCTTGGTGGTCCATGAGCTTGAGGATGACCTTGGAAAGGGTGGGCATGAACTCAGTTTGACAACTGGAAATGCTGGTGGAAGATTAGCGTGTGGTGTGGTTGGTTTGACTCCAGCATAAATAGTGAAGCAAATGTTTTTGTAGCAGTCGTGTTATTTTATCTGATGTTATGTCTTCTGTGANNGCATGATGACTCACGTTCTTACTTTCTTCAGTTACCAATGCAANCTGTAAAGCANAATGTCCTTCTAANGATNA…
Gma.5576.1.S1_x_at	CD417924	At3g10920	4e-92	Disease & Defense			TGTGGCTTGGTCTGGACAAAGAGTTGAAGAGGCTTGTAGTTGAAACCACTGCCAACCAGGACCCACTGGTTACTAAGGGACCAAATTTGGTTCCATTGCTTGGTATTGATGTTTGGGAGCATGCGTACTACTTACAGTACAAGAATGTTAGACCAGACTATCTNAAGAACATTTGGAAAGTTATTAATTGGAAATATGCCAGTGAAGTGTATGAGAAAGAGAGCTCTTAGTCTGAANGNGCTACTTGATATAGCNNTTGAGATGACAGATTTGCAGCACGGTAAGAGATGTGGAATAAAATGATNNNATGNNATGTAATANATANCACTANNNNTTTTATGTAGTTGTACTGAAGAACCTCGAGCAT
Gma.8498.1.S1_at	AF329816.1	At1g12520	1e-107	Disease & Defense			ACAGTAAAGAGCCACTGGGCGACCTGGGAACACTAGAAGCTAACGAAAAGGGTGAGGCCTTCTATAGTGGGGTCAAAGAAAAGCTGAGGGTGGCTGATCTTATTGGACGATCTGTGGTGGTATATGCAACTGAAGATAAATCAGAACATGGTATAACTGCTGCAGTAATTGCCAGAAGTGCTGGGGTGGGTGAGAACTATAAGAAACTCTGTACGTGTGATGGCACCACCATATGGGAGGCCACGGATACAGATTTTGTTACTAGCAAGGTCTGATAGATAAAGTAATTCACTGAAAACAAAGCATTGCAATTTAGTTGTCTTGTCGCCCATCAGCTCTACCATATTTTGAGGATTGTATCCGCCTTTCAGGA
Gma.3810.1.S1_s_at	BI972063		0.009	Disease & Defense			GGCACAATTAGAATGTTTGCAATGTATTGAACTCCTTAATATGTCCTTACCCTTCAAGGGCTGCTTTGTGGTTTGGCAAAGTATTTGTACTTTTGTAGTAACAAAGAGTACTCTGATGGTAATAATTCCTCCTAAT
Gma.726.1.S1_s_at	BG839313	At3g05500	4e-59	Disease & Defense			AAATACGCCGATCGCAAGGTCGCCGAATTGGACCGCCACGTTCCCTCCAACGTGAAGAAGGTCTCCTCCCAGGCCCGCTCCGTCGTCTCCGAAGTCCGCCGTGATGGTGTCTCCGCCTACGCCAAAATCGTTTACTCGAAGTATGAGCCCACGGCGGAGCAGTGTGCCGTCTCCGCATGGAGGAAGCTCAACCAGCTTCCGCTCTTCCCTCAGGTTGCCAATGTCGTGTTGCCCAAGGCTGCCTACTGCACTGAGAAGTACAATGAGGCGGTTGTTTCCTCTGCTGAGAAAGGTTATAGGGTTTCTGCTTATCTTCCTTTGGTGCCTACTGAGAAGATCGCCAAAGTCTTCGGTGGAAACTGATCTCGTTCTATTGCGTTTTTTAATTTCTATTTTTCT…
Gma.2523.1.S1_s_at	CA852440	At2g15220	1e-74	Disease & Defense			AAATCCATCTCAGTGCAAGATACGTTGGAAACAATAAAGGGGACGTGAAAACAGAGATAACAGGTGTGCTGTACCATGAAATGGTGCACGTTTGGCAGNNNNNNGGGAATGGTCGTGCTCCTGGTGGATTAATTGAAGGTATTGCGGACTATGTTAGGCTGAAGGCAAACTATGCACCTAGTCACTGGGTGAAAGCAGGGCAAGGACAGAAATGGGACCAGGGTTATGATGTTACTGCACGCTTTTTGGACTATTGTGATAGTCTCAAAAGTGGGTTTGTGGCACAACTTAACAAGTTGATGAGAACTGGTTATAGTGATCAATACTTCGTTCAGTTACTGGGAAAACCGGTTGATCAGCTCTGGCGAGACTACAAGGCCAAGTATGGCAATATTGCCT…
GmaAffx.91396.1.S1_at	CF807731	At2g15220	4e-54	Disease & Defense			GTGCACGTTTGGCAGTGGAGTGGGAATGGTCGTGCT
GmaAffx.93642.1.S1_s_at	CF809367	At2g15220	1e-12	Disease & Defense			GTATGGCACTAGTTAAGAGGCTATGAGAGCTTTGTACGATATTTTTAAAAATAAGCGAGAATGTCGCAATCTATTTGTAGATTAATTTGTATTAAGTCTATGTGTATTCAGCAGAATGGATGTTGTACCTAACTCTGATCTGTAAGCCGTGTGTGTGTGCCAATAATTGAA
GmaAffx.83583.1.S1_s_at	AW201851	At3g23800	4e-19	Disease & Defense			GGTGGACTGAAAATCAACCCCAACTTCTTTGTGGACTTTGGAACTGAGCCTGATGGTCCTTCTCTTGCCCATGAGATGAGATATCCTGGTGGTGACTGTACTTCAGATATATGGATTTAAACATACGTGTCATTATTTCCCTTTAATAAACGGATCTGTCATATGGTTGTAATGNGCTACTATGCTATAAATAATGCTCTTGTGAATCTTCAACTTTTTGAAGACAGTTTGCAAT
Gma.6299.3.S1_at	BU547701	At4g14030	0	Disease & Defense			AAAATCCTAAACTGACTGGACAAGTATGGGTTGGTGGACTTATCCAGAAAGGAAGCCCTGTAGTAGCTATAACTGATGATGGTGAAACATGGCAAGCTGAAGTTCCAGAGATTCAGGGAAACAAGTTGAGAGGGGGCCCTCAGATGATTCAATTGAGTTTAGATGGGAAGCGGCTCTATGCTACCAACTCACTATTTAGTACTTGGGACAAACAATTTTATCCAGAGCTTGTCCAGAAAGGCTCCCACATAATACAGATTGAT
Gma.18032.1.S1_at	BG650211	At4g24190	0	Disease & Defense			TGTACCAGACTGCACTCTTTGAAAGCGGCTTCCTGCTTGATGATCCCAAGGATTTTGCTTCCCGGATTTATGATTCAGTGAAGACTAGCCTGGACATCAGTCCTGAAGCAACAGTTGAGGAGGAAGATGACACTGAAGTAGAGGCTGAAAGTGACGCGAAAGAAGATTCAAAGCCTGAAACTGATGCTGTTAACGATGATAATGATGTCAAGGACGAGTTGTAGATTTTGCATGACATCCACTATTTAATGACGGTGCTGCCGATTCCCCTTTGTTTGTTTTAGCTTTAAGATAGACCGTAAAAGACTTCTTTAGCATGAGTTTTGATTTCATAAGTAGTTAAAGGAGAACATTAGTCTTACTGTAATCATACTATCCCCTTGGAATTTTGCCTNACCA…
GmaAffx.91200.1.S1_s_at	CF806925	At4g24190	2e-87	Disease & Defense			GAGGTTATTTTCTTCACGGATCCAGTTGATGAGTACTTGATGCAATACCTGATGGATTATGAAGACAAGAAGTTTCTTAATGTGTCCAAGGAGGGTTTGAAACTTGGGAAAGATTCAAAAGACAAGGAACTGAAGGAATCTTTTAAGGATCTTACCAAGTGGTGGAAAACTGCTCTTTCCAAAGACAATGTTGATGATGTGAAGATTTCCAACCGATTAGATAACACTCCTTGTGTAGTGGTGACATCAAAATTTGGTTGGAGTGCTAACATGGAGAGAATCATGCAGTCTCAAACTTTGTCAGATGCTAGCAAGCAAGCATACATGCGCGGCAAGAGGGTTCTTGAGATCAATCCTAGGCACCCTAT
GmaAffx.70836.2.S1_s_at	AI988244	AtCg00180	3e-28	Energy			CGTCTTCCTAGTTATATCGCAAATCTTTTAGATAAATCTCTAAAGGAATTAGAAAGTCTAGTATACTGCGATGTGTGATTTGATAAAAATTTTTTATTGTACAGATTCCGAATGAGAAACTGTCATTCCATTTAATTTAATTGGGATGCCCTGAATCTGACATGTCTCTTGGAATGAGTAACATGAAACTCAGAATTATGGATGTATTGAATACTCCCTAATAAA
Gma.1651.1.S1_at	CD395076	At3g17880	6e-75	Energy			CTGAAGCCCAAGTACAAGCAGCATTATCTGCTTTAAAAGATGGGCAAGTCATGGGTATTCACTCTAGTGGTGAATTGGAAAAGAAGTTAAGTGCTGCATCAAAGACATCACGCTTGGCGATCCTGTATTTTACTGCAACATGGTGTGGCCCTTGTCGCTTCATTTCCCCTATTTATACAAGCTTGGCTGAAAAGTACCCAAAAGTGGTTTTTTTGAAAGTTGACATAGATGAGGCCAGGGACGTTGCTGCAGGTTGGAATATTAGCAGTGTTCCGACATTTTTCTTTGTTAAGAATGGCAAAGAGGTTGACAGTGTGGTCGGGGCAGACAAAAGTACACTTGAAAGCAAGATTGCACAACATGCTGGCTCT
Gma.11925.1.S1_at	CF922804	At1g11530	1e-39	Energy			GTGGCTATGACTCCTGTTTTTGAAGAACTGGCTTCAAGCTATCCGGAAGTTCTGTTTCTCACTGTTGATGTTGATGAAGTCAAGGAGGTAGCCACCAAAATGGATGTAAAGGCAATGCCAACATTTTTGCTGCTGAAGGACGGTGCTGCGGTGGACAAGGTGGTTGGTGCCAATCCAGAAGAGATAAAGAAAAGGATAGATGGGGTTGCTGAGTCCACTCGTGTCTCACTGGCATAGTTAAGCATCTGTATGATATTCTACTGTTGCAAGTTGCAAGATATGTGCTTGTGGTCCTGCACTGCACTATGGCATCTGAGTCAAAGCTTTTTGTGATGTTGTATGTTGTTGAATATCAGTTCAAGTGTAATTTCCAAATTTGATAAGCGCAATGCTTTGGTT…
Gma.4359.1.S1_a_at	AI794712	At1g11530	7e-38	Energy			AAATAGACTCTCAAAAATCATGGGAACACCACATCTCTTATGCTACCAATCAAAAGTACCCTATTGTAGTTCATTTCTCTGCTTTCTGGTGTGTCCCTTCTTTAGTTATGAATCCTTTCTTTCAAGAATTGGCCTCCACTTATGAAGATGTTTTGTTTCTGACGTTGGATGTGGATGAGGTTAAGGAAATTGCCTCCAAGATGGAAATCAAAGCCATGCCCACCTTTCTGTTGCTGAGTGGAGGGACTCCTGTGGACAAAATTGTGGGTGCAAATCCTGATGAAATTAGGAAAAGGATTGACCATTTTGTTCACTCAACTCGTTCCTAGAACTTTTGTTCATTGTGCTAGGAAGCATTTCATATATGTTTTATATTCCAAAGTAATATTTATACGGGTT…
Gma.4359.2.S1_at	BI968877	At1g11530	5e-36	Energy			TGCCACCAATAAAAAGTACCCAGTTGTGGTTCATTTCTCTGCTTTCTGGTGTGTGCCTTCTATAGTTATGAATCCTTTCTTTCAAGAATTAGCCTCCACCTATGAAGATGTTTTGTTTCTGACGTTGGATGTGGATGAGGTTAAGGAAATTGCTTCCAAGATGGAAATCAAAGCCATGCCCACCTTTCTGTTACTGAGTGGAGGGACTCCCATGGACAAAATTGTGGGTGCAAATCCTGATGAAATAAGGAAAAGGATTGATCATTTTGTTAACTCANCTCATTCCTACAAATCTGTGTAAACCATGCACATGATGAACAAGGAGTTGGCCAAATCCTAGAACTGTTGTTCATTGTACTAGGAACCATTTCATATATGTTTTATATTCCAAAGTAATAT…
GmaAffx.92537.1.S1_at	CF808262	At1g11530	7e-33	Energy			AAAATTGATTCCTTGTATGTCACAAATTCCAAGTGGTTGATCTTTTGTTATTTGTATAAGTTTCGGTGTGT
Gma.6029.1.S1_at	AW309628	At1g76760	3e-44	Energy			CCTGTGTTGGTTGACTTCTATGCAACCTGGTGTGGTCCTTGTCAATTNATGGTTCCCATACTCAATGAAGTNAGCACTCGGCTTNAGGATAAGATACAGGTGGTGAAGATTGATACTGAGAAGTATCCNANCATTGCTGACAAATACAGAATTGAGGCGTTGCCGACTTTCATCATGTTTAAGGATGGAGANCCTTATGATCGCTTTGAGGGAGCATTGACTGCAGATCAGCTCATTGAACGCATNGAAGCNGGCCTCAAGGTTAAGCAATAACCCTACTATAATGAAGACACANNGAAGCTTGTCTATTGGAATGTTCGATCACATACATGATATGATTGACTGGAATCACTTGTTNNNTCAACATCATTCAGACATTTTTNGAAGNGATTAATGTAT…
Gma.8119.1.S1_s_at	BU548381	At3g51030	2e-40	Energy			GGCCCCAGTTCTTGCAGAGATTGCAAAGAAAACTCCTGAATTGATCTTCCTCAAAGTGGATGTGGATGAAGTGAGGCCTGTTGCTGAGGAATATTCCATTGAGGCCATGCCAACCTTCCTCTTCTTGAAAGATGGCGAGATCGTGGACAAGGTGGTTGGTGCTAGTAAGGATGACCTTCAAGCCACCATAG
Gma.8119.2.S1_at	CD410224	At3g51030	3e-41	Energy			AAACATGGCTGAAGAGGGTCAGGTTGTCGGCGTCCACACCGTTGATGCGTGGAACCAGCAACTGCAGAATGGAAAAGACTCCCAAAAATTGATTGTGGTGGATTTTACTGCTTCCTGGTGTGGTCCATGCCGTTTTATTGCCCCAGTTCTGGCAGAGATTGCTAGGCATACTCCTCAAGTGATCTTCCTCAAGGTGGATGTGGATGAAGTGAGGCCTGTTGCTGAGGAATATTCCATTGAGGCCATGCCAACCTTCCTCTTCTTGAAAGATGGCAAGATCGTGGATAAGGTTGTTGGTGCTAAGAAGGA
Gma.9838.1.S1_at	BF595182	At3g51030	2e-48	Energy			GAGGGACAAGTCATTAGCTGCCACACCGTTGAAGAATGGAACGATCAACTCCAGAAGGGCAACGAATCCAAGAAACTCATTGTTGTGGATTTTACTGCTTCTTGGTGTGGACCATGCCGTTTCATTGCACCATTCTTGGCTGAGCTGGCTAAGAAGTTCACAAGTGTCATATTCCTAAAGGTGGATGTGGACGAATTAAAGAGTGTTTCTCAAGATTGGGCTATTGAGGCTATGCCCACTTTTGTGTTTGTGAAAGAGGGAACGCTTCTGGACAAAGTGGTGGGAGCAAAGAAGGATGAGCTGCAGCAGAAAATACAGAAACATGTGGCTTCAGCTAGTGCTTAATCTAGCTCACCTTCAGAAACTTTATATATGCGCTTTCTTTTCATAATCTTGTAC…
Gma.1305.1.S1_at	CD411822	At5g39950	4e-43	Energy			CTACTTCTAGAGTCTCCTCCTTCCACTCGTCGC
Gma.1305.1.S1_s_at	CD411822	At5g39950	4e-43	Energy			GCTCTACTTCAACGAGATCAAAGATACCGATAAGCTCGTTGTGATAGATTTCTCGGCGTCGTGGTGCGGTCCTTGCAAATTCATAGAGCCAGCGATTCACGCCATGGCCGACAAGTTCAACGACGTTGACTTCGTCAAGATCGACGTCGACGAATTACCTGATGTGGCGCAGGAGTTTCAGGTGCAGGCGATGCCGACTTTCGTGTTGTGGAAGAAAGGGAAGGAAGTCGACAAGGTTGTGGGCGCAAAGAAGGACGAGCTCGAGAAGAAGATTGAGAAACATCGATCGTGATCTTAGCTCTGTAATCCTATTCATTCAGCTATTTATCTTTCTTTCCAAGGTGAAAAG
Gma.15886.1.S1_x_at	CD405745	At5g39950	3e-47	Energy			GGAGAGTTCTGCTTCTAGGGTCCAGTCTTTCCACTCTTCGGCGCGCTGGCAGCTCCACTTCAACGAGCTCAAAGAAACCAATAAGCTCGTTGTGATAGATTTCTCGGCGTCGTGGTGCGGCCCTTGCAAATTCATAGAGCCAGCGATTCACGCCATGTCCGAAAAGTTCACCGACGTTGACTTCGTCAAGATCGACGTCGACGAATTGCCGGATGTGGCGAAGGAGTTTAATGTGGAGGCGATGCCGACGTTCGTGTTGTGTAAGAAAGGGAAGGAAGTCGACAAGGTTGTGGGCGCAAAGAAGGACGAGCTCGAAAAGAAGATTGAGAAACATCGATCGCAATCTTAGCTCTGTAATCCAATTTATCCAGTTATTTATCTTTCTTTTCAAGAGAAACA…
GmaAffx.41477.1.A1_s_at	BM270428	At1g12230	6e-16	Energy			GGCCTGCAGCTGTGCAGCTTCTGGCTGCTGGACTGGATGGCCATGCTGATCAAGCAAAGCGGGTGGAAGAGTTATTTGAGAAAATTTGGCCACCACCTAATGTATGATTCGACTTCTTTATGTCGCACGAGAGTCTTTTGCCTGATGGATCAATAAACATAACACACAACAGATGAAGGGAATATTCCATTGTTTTTCTTTCCCTCTTAACCTTGAATTCTTGAACAATTTAGCACGCGGTTCCTAAATGCACATTTTG
Gma.6258.1.S1_at	AW349094	At5g25450	4e-36	Energy			CCGAAGAAGAACTGGTTCGCCGCTCAGCACATGAAATCCCT
Gma.6258.1.S1_s_at	AW349094	At5g25450	4e-36	Energy			GACGATTTGTACGATCCTTACTACGATCTNGATGTGAAGGAGGCGCTGAATCGGCTTCCGAAAGAGGTGGTGGACGCTCGCCACGCGCGTCTTAAACGCGCCATCGATCTTTCCATGAAGCACGAGTACCTCCCTGACAATCT
Gma.2731.5.S1_at	BQ299100	At3g10860	2e-26	Energy			GATTTCGCATTGGTTTGCGTTGCGTGGTTGGTTTTGCGGTATCGAAGAAGAAGATGGGGAAACAGGTTGTGCCGGTGAAATCAGTGATCTACGCGCTTTCCCCTTTCCAGCAAAAGATTATGCCGGGTCTCTGGAAGGACTTGCCCACGAAGATTCACCACAAGGTCTCCGAGAATTGGATCAGCGCCACTCTTTTGCTCGGTCCCCTCGTCGGCACCTACGCGTATGTTCAAAACTACCTGGAAAAGGAGAAGCTGGCTCACAGGTACTGAGCTCTTGCAAGAGCTGATTGGAT
Gma.5057.2.S1_a_at	BE475334	At5g13430	1e-70	Energy			GATAGAGTCAAGGACCCAGAATGGCTCATTGT
Gma.5057.1.S1_a_at	AW310849	At5g13440	1e-103	Energy			GATAGAGTCAAGGACCCAGAATGGCTCATTGT
Gma.4327.1.S1_at	CD414299	At5g56350	1e-178	Energy			TTGAGTGCAGCTTCTGCTAGAGCTTCTCATGCTGAAACAACNGAAGAAGCAATAGAATTCGCCATGCAACATGCCAAGTCCAAGGGTCTCTGCCACAACGGGGATTCNGTNGTGGCACTNCATCGTGTGGGCACTGCNTCTNTCATCAAGATCTTGACTGTGAAATGATCACCCCNATTACANGGAATTCTTCTGCTGTTTNTGGCAAATTTTTTNGATGGTGCAAAAGAGGTCTCGNTATACCTCTTCATATCTACATTGGATGCAAACTTCAATNAAAAGCATTTATTAGGATCGGTTACCTGTTTTTCACATATCATATATTACTGGTTTTTTTTTTTTTNGTTACATTTGCCTTATCATTGTGGCGAGNAGCCACNTGNTTTCATTTGTTAAGAT…
Gma.8709.1.S1_at	BU765404	At4g36750	3e-60	Energy			ATGGCTTGCTGTTTGGTTTTCCAACAAGGTATGGCAGCATGGCGGCGCAGATGAAGGTGTTTTTCGATTCGACCGGTCAGTTGTGGAGAGAGCAGAAGCTGGCAGGGGTGCCTGCTGGCTTCTTTGTCAGCACTGGCACTCAGGGTGGAGGCCAAGAAACCACAGCTTGGACAGCAATCACACAGTTAGTCCACCATGGTATGCTCTATGTTCCTATTGGTTATACCTTCGGTGCTGGAATGTTCGAAATGGACTCGGTCAGAGGTGGATCTCCATATGGTGCTGGAGTTTTTGCTGGCGATGGATCAAGGCAGGCTAGTGAAACAGAACTGGCCCTTGCTGAGTATCAAGGAAAGTACATGGCCACAATAGTCAAGAAGTTAGGCCAGAAAAGCTAGT…
Gma.8941.1.S1_at	BU764086	At4g36750	8e-05	Energy			GCAAGTATATGGCTGTTGTAGTCAAGAAACTCGCCCAGTCATGAATGGTGTTTTCTTCATTTCATTCTATTCTTGTTTGATTATCTCTGTATTTTTTGACCGTTCTTTTTGTCAAATTGGTTCTAGCATTTTACCATTGCATTGTGATGACTGGTGAGGAACGGCAGTTCTGTTACACTATCGATTCTGTTGGGTTGGGGATTCCCATGTTGGGTTCTGCTTTGTTTCTGGAAGGTGTAGATGTTCGTAAATTTTCGTCAT
Gma.5584.6.S1_s_at	BG047114	AtCg00630	6e-17	Energy			TTGTTATTTTGGAATGTACCGGTTGNGATAAAAAGAGTGTTAATAAGGAATCAACGGGTATTTCTAGATATATAACTAAAAAGAATCGACAGAATACGCCTAGTCGATTGGAATTGAGAAAATNTTGTCCNCCGTNGTTGCAAACATACAATTCACGCANAAATAAAGAAATAGATCAAATTGATCGCTTGTGTGTTACCCTTCGAACCAA
Gma.5427.2.S1_a_at	BM885334	At1g15690	1e-103	Energy			TTGTCATGCTCACACCACTCATTGTTGGAATCTTCTTCGGGGTGGAAACACTTTCAGGTGTTCTTGCCGGGGCTCTAGTTTCTGGTGTACAGATTGCAATATCAGCATCCAACACTGGCGGTGCTTGGGATAATGCTAAGAAGTACATAGAGGCTGGTGCGTCTGAGCATGCAAGGACCCTGGGCCCGAAGGGATCTGAACCACATAAGGCAGCTGTTATTGGAGATACCATTGGAGACCCTCTTAAAGATACTTCAGGTCCTTCACTCAACATCCTCATCAAGCTCATGGCCGTTGAGTCGCTCGTCTTCGCACCATTTTTCGCCACTCACGGTGGCCTGCTTTTCAAGATCTTTTGATTTGAGGGTAGAGTTTTCTATCAATTTATCCTATTTTTCT…
Gma.14563.1.S1_s_at	CD399224	At2g02850	7e-37	Energy			TTGCTGCTTCACTCTCAGATGGCTCGTGCTGCCACCTACACAGTTGGAGATTCTGGGGGTTGGACCTTTAACACTGTTGCCTGGCCCAAAGGAAAGCTCTTTCGGGCTGGTGACACACTTGCTTTCAATTATAGCCCTGGGACTCACAATGTGGTGGCCGTGAACAAGGCTGGATATGATAGCTGCAAGACTCCAAGAGGAGCCAAAGTGTATAAGTCAGGGACGGATCAGATCAGACTTGCCAAGGGACAGAACTACTTCATCTGCAATTATGTTGGTCACTGCGAGTCTGGGATGAAAATTGCCATCAACGCTGCCTGAGTTTAATAATATGGTTAACTNCCCATACATATTGTATTGTAATGCAAATTGCACCCTTTAGTGGGAAGTTAGCTCCTT…
Gma.7436.1.S1_at	BU547698	At2g02850	2e-36	Energy			TTTGCTTCTTGGTGCTTCAGTCTGAGATGGCTCGTGCTGCCACTTATAGAGTTGGAGATTCTAGGGGTTGGACCTTTAACACCGTTACCTGGCCCCAAGGAAAACGCTTTANGGCAGGTGACACACTTGCGTTCAATTATAGTCCTGGGGCTCACAATGTGGTGGCGGTGAGCAAGGCTGGGTATGATAGCTGCAAGACACCAAGAGGAGCCAAAGTGTATCGGTCAGGGAAGGATCAGATCAGACTTGCTAGGGGACAAAACTACTTCATCTGCAATTACGTTGGTCACTGCGAGTCTGGGATGAAAATTGCCATCAACGCTGCATGACTTTCTTCTCTACTCATACGCATCTATTCTAACGCAAACTGCACCCCTTTAGTGGGAATCAACTTGTCTC…
Gma.9944.1.S1_at	CD398368	At2g20260	2e-28	Energy			GAGAAATCATCATGGCATCAGCAGCATCTGGGTTTGTGNTGTCNCTTAATGTTGCAGCTNCCACCACAAACTCAAGGGTGGTCNTGTTCAACACNAAGAACAACNCTTCTAGGNTTNTTGTNAGGGCTTCAGATGAGCCTGCAGCGGCGGCACCCGCCACCGCCACACCCCCAGCTGAAGCTGAAGCNAAACCAAANCCACCACCTATTGGCCCCAAGAGAGGTGCTAAGGTGAAGATTCTTAGGAAGGAATCNTACTGGTACAAAGGCACTGGTTCAGTGGTTGCTGTTGATCAGGACCCCAACACTCGCTACCCTGTTGTGGTTCGATTCAACAAAGTCAACTATGCCAATGTATCAACAAACAACTATGCTTTGGATGAGATNGTGGAAGTGGAAT…
Gma.15499.1.S1_at	AW348149	At5g65690	1e-156	Energy			GCATTCATTATGCTACACCCTACAAAGTATGCAGCAAT
GmaAffx.65693.2.S1_s_at	CA799713	At5g65690	1e-73	Energy			AAGGTGGTTGCTATGCCAAATGCATTGACCTCTCACGGGAGAAAGAGCCAGATATTTGGAATGCAATCAGGTTTGGCACAGTGTTGGAAAATGTGGTGTTTGATGAGCATGATCGAGAAGTTGATTACTCTGACAAGTCAGTTACAGAAAATACTCGTGCAGCTTATCCTATAGAGTACATTCCAAATGCAAAGTTACCTTGTGTTGGCCCTCACCCAAAGAATGTCATACTTTTGGCATGTGACGCATTTGGTGTACTCCCACCCGTTAGCAAGCTAAACCTGGCACAGACCATGTACCATTTCATCAGTGGATATACTGCTTTGGTGGCTGGCACA
Gma.350.1.S1_at	D10717.1	At1g53310	0	Energy			GAGACCCAGGGATAGCTGCTCTTTATGATAGGCTCCTTGTTTCAGAGGATCTGTGGTCATTTGGGGAGCAGTTGAGGACCATGTACGAAGAAACCAAGGAACTCCTCCTTCAGGTGGCTGGCCATAGGGATCTTCTTGAAGGAGATCCATACTTGAAGCAAAGACTGCGCTTGCGTGATTCTTATATTACTACCCTAAACGTGTGCCAAGCCTACACGTTGAAACGTATCCGTGATCCAAACTATAATGTGAAGCTGCGCCCTCACATCTCCAAAGAGTCTATAGAGATAAGTAAACCTGCTGATGAACTTATAACACTTAACCCAACAAGTGAATATGCACCTGGTTTGGAAGACACCCTCATTCTCACCATGAAGGGTATTGCTGCTGGCTTGCAAA…
GmaAffx.32146.1.A1_at	BQ273585	AtCg00600	9e-14	Energy			ACCTCATCTCTATTTATTGGTCTGAGTAAAATACGACTTATTTGATTTGTAATTTTGAGAGGAATAGTCAATTTTGGAATAAGACATTCTATAGTTCCTTACTGTGTCAATTTACAATTCTCGGTCGTTGAGATTCATGATCAATACAGATTAATGGTTAAGGATAGATATTACCTTTCTTTTTACCTTTCGAACAAATAAAAATGATTGAAGTTTTTCTATTTGGAATCGTGTTAGGTTTAATTCCCATTACTTTGGCTGGATTATTTGTAACTGCATATTTACAATACCGACGAGGTGATCAGTTGGATCTTTGATTAATTAATGTCTCTTTTTTTGCGGATTCCCTATTTTTTTGTTTTAATCCTAATCTACAAGGATTAAATTCAGACTTTTTAA…
Gma.16636.1.S1_at	AW705534	At3g15020	2e-52	Energy			AATCAAATTTGCCAACCAGTAATTGAACATGTTATCACATAC
Gma.16636.1.S1_s_at	AW705534	At3g15020	2e-52	Energy			TTCGTGCAATCCACTGTTACTGAACTTCCCTNCTTTGCTTCCAAGGTGAGGCTTGGGANGNNTGGNGTGGAGGAAGTTCTGGGCTTNGGNCNNCTCTCAGATTTTGAGCAACAAGGCCTCGAAAGCCTTAAGCCTGAACTCAAATCATCAATTGAGAAGGGAATC
Gma.3253.1.S1_at	AW348452	At4g17260	1e-145	Energy	Glycolysis		TACTGTTAGTGTTAGTTCCTGCCCTCTTCTTGCAGTGCAAGTGTTTTTGTTGCGTCAAGTGCTGGCTGGATCTCGTGAGATGTGTTTTGTTTCCTGTATGGTTTTAATTAGCCAAGTAAAATTTCATATTTCTGTANNNNNNNNNNNNTGTGCCTCTATTCAGTCAATTACGGAAAAAGATCTTCATTTCTTTTTCTTTCCATTTCTATGATTTTAGAAAAAATAATGATACTCTCCTATTAATGTGTATCATGCCAGTTTCATTTATTTGTCCAAAATTTGAGTAATGGAAGAAACAGAGAGGATCTTAACCCGTGAATAACTCAATGGTAATGCGGCACATCGAATAGGTGCACA
Gma.3871.2.S1_s_at	AW351109	At3g18410	5e-47	Energy			GGGCAAGGACGGTCGTCATCCTTCTCTCCACGCTCCCAAGGTTGAGCCGGTTGAATCTGATTGATTGTCCTGTGGATAAATAAATAAAAAAGAAGGGAAGACTGTTTATCCAACTGATCATATTGCTAAATCGGAAACTGGGTTGGAGGAGTGCTTATTTTGCAGTTATTGT
GmaAffx.1301.38.S1_x_at	CA802260	At4g30210	0	Energy			AGGGATGTACACCGCGCCCTGCACACAATTTTGCAAGAGCAGGGTTCTCTCGATAGTTCCAAGGCTGAGAGCATGGTAAAGAATCTACAAACTACTGGCAGATATTTGCGCGATGTATGGTGATGATATCTGAATGCAAGCCGTGGGGGTGACGAAGATATTAATAAAACATAGAGTTGTGGCTAGAGGATTTTGAAAGGGCCTTATTTGTGCCACCTTTCATTAGTGCCCTCAAAATTGAGGGGGGGCGCTTGTTGCCATCACGACGACATTTCCTACGATTCTTT
Gma.11932.1.S1_at	BI095057	AtCg01050	3e-61	Energy			TCTATATTTTCTCCCTGGTTAATACTATTAGGTTCAATTCAAATAATCTATGCAGCTTNAACATCTCTTGGTCAACGCAATTTAAAAAAAANGAATAGCTTATTCTTCAGTATCTCATATGGGTTTCTTACTTTTAGGAATTGGTTCTATAAGCGATACAGGTCTCAACGGGGCTATTTTACAAATAATATCTCACGGATTTATTGGCGCTGCGCTTTTTTTCTTGGCGGGAACGAGTTATGATAGACTACGTCTTCTTTATCTCGACGAAATGGGTGGAATGGCTATCCCAATGCCAAAAATATTCACGGTTTTCACTATCTTATCGATGGCTTCTCTTGCATTGCCGGGCATGAGCGGTTTTGTT
GmaAffx.19546.1.S1_at	BE583628	At5g17770	1e-120	Energy			GAAATGAGATTGATAACACCATGTGCTAGAGT
GmaAffx.91300.1.S1_at	CF805768	At5g17770	1e-101	Energy			TACCAACCTGGCGAGGTTAGGGCTTTTGGGATGCTTGCNGNANGNNCTGGAATCACCCCAATGTTCCAAGTTGCCAGAGCTATATTAGAAAACCCTAATGACAGGACCAAAGTACATCTTATCTATGCCAATGTTACGTATGAGGACATTCTTTTGAAGGAAGAGCTGGACGGTCTTGCTTCTAACTATCCAGATCGATTCAAAATATACTATGTGTTAAATCAGCCTCCTGAGGTATGGGATGGTGGTGAAGGATTTGTGTCAAAGGAGATGATTCAAACCCATTGCCCTGCTCCAGCACAAGATATTAAGATATTGAGATGTGGCCCACCACCTATGAACAAGGCCATGGCTGCACACCTTGAAGCCCTTGGATATGCTTCTGAGATGCAGTTCCAG…
GmaAffx.91300.1.S1_s_at	CF805768	At5g17770	1e-101	Energy			CAATGTTCCAAGTTGCCAGAGCTATATTAGAAAACCCTAATGACAGGACCAAAGTACATCTTATCTATGCCAATGTTACGTATGAGGACATTCTTTTGAAGGAAGAGCTGGACGGTCTTGCTTCTAACTATCCAGATCGATTCAAAATATACTATGTGTTAAATCAGCCTCCTGAGGTATGGGATGGTGGTGAAGGATTTGTGTCAAAGGAGATGATTCAAACCCATTGCCCTGCTCCAGCACAAGATATTAAGATATTGAGATGTGGCCCACCACCTATGAACAAGGCCATGGCTGCACACCTTGAAGCCCTTGGATATGCTTCTGAGATGCAGTTCCAGTTCTGATTCTCTTCATCGGGGGTGCTTAACATTGCATGCATTTCATGGCCTTGGCCAT…
Gma.4356.1.S1_a_at	BI942101	At5g11770	2e-82	Energy			GTCTCAATGGGAAGTTGTGCTAATGGAGGAGGATACTACCATTACTCTTACTCCGTAGTTCGGGGATGTGACAGGATTGTTCCTGTTGACATATATATTCCAGGCTGTCCTCCAACTGCTGAGGCTTTGCTGTATGGACTCCTCCAGCTGCAGAAAAAGATCAATAGGCGCAAAGACTTCCTCCATTGGTGGACAAAGTGAGGTCGATTCAATCTATTTTCTTGGCATCGAAGCTATTTTATAATAAGCAACTACATGGTAGTTTACCTTGCTAAGAAGCAC
Gma.4918.1.S1_at	CA819981	At1g16700	1e-92	Energy			ATGGCAGCCGCAGGACAACTCGGTATGATATTGACATGACCAAGTGCATNTATTGTGGATTTTGTCAAGAGGCATGCCCTGTTGATGCCATTGTCGAAGGACCAAACTTTGAATTTGCTACTGAGACTCATGAGGAGCTTTTATATGACAAGGAGAAGCTGCTTGAAAATGGGGACCGATGGGAGACTGAAATTGCAGAGAACCTGAGATCTGAAAGCCTTTATCGCTGAAATTTTCCATGTGATCCTTGCCTGTTGCTTTTTCCGTCTAATTGGGCAATGATAAATAAAATGACCAGCGCATGATTTTAAAGAACTGTATGCATACACGATTGTTACATCAGTT
Gma.5706.1.S1_at	BI967978	At4g02580	1e-126	Energy			TTTGTTAAGTGAGCCCAAGCCTCCTCCCTGCCGTGACCTGGATTCCTGCTGAAGTGTNNTATACTTTTTGCCTTCAATAATGTGAGGCTTGCATGTGTTGGAGCTTGCCTTAATTGAAACATTGTCAGATTGTTAGATGCTCAACCAATTTTTGTATCAACCGTCCTGGATGGTTTCCATTTCAAAAATTTGTTCCATAATCGCCATAAATTTCTTGGCATGTTCATTACTTACCAGCGTTATCTATGTTTTTCTGTACTCTGTACATTAATCACCATGAACGAAATTTGAGGTTACNNTGAAATACNATTTAGTTAAGAAGTGAANTGCGTGGCATGCATNANNNANNNNNNNNNNNANNANNNATTTATCAACAATGGTATGGGAGAACAATCATGT…
GmaAffx.91977.1.S1_s_at	CF807702	At4g02580	1e-119	Energy			TTCCATGGGAATTCACCGAGGCCAATCAAGCAAAGGTTAAGGAGATTTTGTCTCACTATCCATCCAACTATAAGCAATCTGCTACAATTCCTCTTTTAGATCTTGCCCAGCAGCAGCATGGAGGTTGGCTACCTGTTTCTGCAATGGATGCGGTAGCTAAGATTGTAGAGGTTCCTCCCATACGGGTGTATGAGGTTGCCACATTTTACTCCATGTTCAATCGAGCTAAGGTTGGGAAGTACCATCTGTTGGTTTGTGGAACAACACCTTGTATGATAAGAGGTTCACGAGGAATTGAAGAAGCCTTATTGAAACACTTGGGAGTGAAGCGCAATGAAGTAACACCAGATGGTTTGTTTTCTGTTGGAGAAATGGAATGCATGGGATGCTGTGTGAATG…
Gma.10702.1.S1_at	BE057108	At5g08530	2e-48	Energy			GCATGGCCAGTGCAGGGTCTTATCAAGCATTTCAGGCCTGAGCTTGAGAGAAGGATTAGAGAACATGCAGAAAGGGAGCTGCTGCAGGCCACTGGTTAGGCTTTCACTAAGGGGTGTGATTGTACTGCTGGATAGCAAGAGTGAGAATAAGACAGTGCCAGTCATTTTGGAAAGATAGGTGGCTCAGGTTACTGTAGCTTTATTGCTACTTCTATTTTCTTTTATGCTGTAGCAATTATGGCTGGATCATACCTGGGAAACCATTTGGGCGAGTTTAAACTGTACCTGCTTGTCATTTGGCACATTTTCATGTAATTTGTTAATAATATCTGTATACTGTTATTAGTTTTGAAACACAATTCATGATTATGCATGTTATCAGTGAATATGATGAGGGAT…
Gma.11058.1.A1_at	CD393957	At5g47890	3e-35	Energy			CTGCTCTTGTTATTGCAAATTGCCTTTTGGTTTAAAATAAGCCAGGTCTTTTTCTATGTCCCATGGCCTCTGGTTTCAGCCTGTCTCTGGATCTTACATCGTTTCAAGTATGACACTGTTGAGTTTAAGTTCAAAATCCTGGTTTTGCATGTTGAACACATCGAGGGAGATTTAT
Gma.2162.1.S1_at	BI968990	At2g01140	1e-165	Energy			TTTCTTTCTCATATGCACGGGCTCTTCAGAACACNGTGCTNAAGACATGGCAAGGACACCCTGAGAATGTGGAAGCTGCTCAAAAGTCCCTTTTGGTGCGTGCTAAAGCAAACTCCTTGGCTCAACTTGGAAGATACTCTGCTGAGGGTGAGAGTGAAGAGGCCAAGAAGGGAATGTTTGTCAAGGGCTATACCTACTAAAACT
Gma.12202.1.S1_at	AW459431	At2g36460	1e-164	Energy			AACGCCATGAACAAGTCCCAGGGAAAGAAGCCGTGGTCCCTTTCTTTCTCTTTTGGAAGGGCACTTCAGCAAAGCACTCTCAAGGCATGGGGTGGGAAAGATGAAAACATTAAGAAGGCTCAGGATGCTTTATTTGCCAGGTGCAATGCAAACTCACATGCAACTTTGGGAACTTACAAAGGTGATGCTACCCTTGCTGAGGGTGCCTCCGAGTCTCTCCATGTCAAGGACTACAAATACTAACTAAAGGTGTTGACTTCTTTTAATTTGGAGAATTTTTGCACTATTGGCTACACCATTCTCATGTTCTTTCCTTCATAGAAGTTAGACTCGGCCGATTTGCTTTCTGCTCTCGGTTATAGGATGTCTACGGATTAAAGAATAATCGCATCAAGCTAA…
GmaAffx.35832.1.S1_at	AW459932	At3g24170	1e-170	Energy			GAAGCTTGTTGTTGATGCTGAGACAGATAAGGTTCTCGGAGCCTCAATGTGTGGNCCTGATGCACCTGAAATTATNCAGGGTATTGCTNTTGCNTTNNAGTGTGGAGCTACCAAGGCACAGTTTGATAGCACGGTGGGAATACACCCATCGGCTGCNGAAGAATTTGTAACCATGCGGTCAGTGACAAGGCGCGTAGCNGGAACTGGAAGTGNCAAACCCAAGACCAATTTGTAAAATGTTTAAAANGAAAATACGATNTGCTTGATGGTNGTGTAAAGATGCAAATGACTTCTTTTGGTGACCTTCCCATTACTATAGATCACAAACCCATCTGTTTTTCTTTCCCAAAAAAATGTTTGTGTTTTTTTTTTCTTTGCGAATTTCATTTTATTTAAAAT…
Gma.16750.1.S1_at	BE658232	At5g40760	0	Energy			GATGTCTACGGTTCAAAGTGAGCTTGACTTGTCATATGGACAACGGTATCAAGGAGTAACCATTCCTGAGGCTTATGAACGCCTAATTCTTGACACAATTAGAGGTGATCAGCANCATTTTGTTCGCAGAGATGAGTTGAAGGCATCCTGGCAGATCTTCACCCCACTTNTGCACAGAATTGATGAAGGGGAATTCAAGCCACTCCCCTACAAACCAGGAAGCAGAGGTCCTGCAGAAGCAGATCAGTTACTTGAAAAAGCNGGCTATGTTCAAACACACGGCTACATATGGATCCCTCCTACCTTGTAGAGTNATCTAATGTAATAANATGAGGAATNTTTAGNTGCTAATGAATACACAATAAGCTTGNGAGGCTTCNNNTGGAACCACTCCTCATG…
Gma.16750.2.S1_s_at	BI700016	At5g40760	3e-30	Energy			ACTCCCCTACAAACCAGGAAGCAGAGGTCCTGCAGAAGCAGATCAGTTACTTGAAAAAGCNGGCTATGTTCAAACACACGGCTACATATGGATCCCTCCTACCTTGTAGAGT
GmaAffx.80939.1.S1_at	BE607604	At5g40760	3e-20	Energy			TTACCAACCTGGAACAAGAGGTCCTGTAGAAGCAGATAAATTACTGCTGGAAAAAGCTGGTTATGTTCAAACACATGGTTATAGATGGATCCCTCCAACATTGTTGAAAGAACAATGTTACACTAGCTTGCACTACCTTAAAATTTGTTGATGCGTGCACTTAATAAGCTTGGGAAAATCCCCTTGGAGCAAGACTCTTCCCTAATGGGTGATTTTATCAAGCATATGAATAAATGTGGTTGACATTGTATATTTAATATTATCTGCCTACGAATGCAGAAGAATAAGTGGTTGACATGGTGCATGTTACGTTATTTGCTTGTG
Gma.17053.5.S1_s_at	BM309062	At1g13440	6e-49	Energy			GGCAAGGTCAAGATCGGAATCAACGGATTTGGAAGAATTGGCCGTTTGGTTGCCAGAGTCGCTCTGCAAAGAGACGATGTNGANCTCGTTGCCGTTAACGACCCTTTCATTACCACCGATTACATGACATACATGTTTAAATACGACAGTGTTCACGGACACTGGAAGCATCACGATGTCACCGTTAAGGACGAGAAGACCCTTCTCTTCGGTGACAAGNCAGTCACTGTTTTTGGACACAGNAACCCTGAAGAGATCCCATGGGGGTCAACTGGAGCTGANATCATTGTTGAGTCCACCGGAGTTTTCACCGATAAGGACAAGGC
Gma.5505.1.S1_a_at	BI942102	At1g13440	1e-149	Energy			AAACTTGTTTCCTGGTATGACAACGAATGGGGTTACAGTTCCCGTGTGATTGATTTNATTGNCCACATTGCATCCGTGGCTTAAANANTTGAGNCTGANCTTGGATATCATCGCTANACCGTTCCAAATTTTTATCTTAATCGAGTTTATTTTAGTGTGAATTCGGAATAAACAC
Gma.1674.2.S1_at	BU546187	At2g27510	2e-14	Energy			AACTGGGAATTTAAGCAAGCACTGTGATCTTAATTAATAAGACGATAAGCACCTTCGGTTGGCTTTTAAATGTGGTAGTTGTTTTTTCTTTCTTTTGCTTCTTTATTCGGTTCTTTTAATGTGTTTCT
Gma.2679.1.S1_s_at	BI945807	At2g27510	8e-40	Energy			GGCGGTATATAAAGTGAAGCTGATTGGACCNGACGGTGAAGAGAATGAATTTGAAGCCCCTGATGACACTTACATTCTGGATNCNGCTGAAAATGCTGGAGTGGAGCTACCTTACTCATGCAGAGCTGGNGCNTGCTCTACTTGTGCTGGCCANGTTGTTTCAGGCTCTGTGGATCANGCAGATCAATCCTTTCTTGATGACCATCAAATNNAAAAGGGTTACCTTCTGACATGTGTNTCATACCCGAAATCAGATTGTGTGATTCACACCCACAAGGAGGA
GmaAffx.93056.1.S1_s_at	CF808781	At2g27510	9e-34	Energy			TTGCCGAGCCGGAGCATGCTCTACCTGTGCTGGGAAGATTGTTGCTGGTTCTGTGGACCAGTCTGATGGCTCATTCCTCGATGACAACCAACTGAAGGAAGGCTTTGTGCTTACTTGTGTCTCCTATCCAACTGCAGACTGTGTAATTGAAACTCACAAGGAAGGAGATCTCTATTGAGCAATGCTGGCCTTAAAGTTGGGAATTGGGGAATTTAAGGTAGACTCTGCAACTTGTTTGCTTGTTCTGCTTTAGAGTCAAATTTTCTTTTGGGATTATTAGTGATTTGGTGTAATGATTTTTTGTTTGTGCAAGCAAGCACTGTGATATTAAGACGATAAACACCCGTCGT
Gma.17597.1.S1_at	AW349391	At2g36530	0	Energy			AACCAAATTGGTTCTGTGACTGAGAGTATTGAAGCTGTCAGGATGTCCAAAAAAGCTGGATGGGGTGTCATGGCNAGTCACAGAAGTGGAGAGACTGAGGATACCTTCATTGCTGACCTTTCTGTTGGTTTGGCNACGGGTCAAATTAAGACTGGAGCTCCATGCAGGTCNGAGCGTCTTGCTAAATATAACCAGCTCTTGAGAATTGAGGAG
GmaAffx.93557.1.S1_s_at	CF808765	At2g36530	1e-128	Energy			TGCCATATTGGCAGTGTCTCTTGCAGTCTGCAAAGCTGGTGCTNGCNGTCCTGAAANTTCCTCTTTACAAGCATATTGCNAATATNGCGGGTAACAAAAAGTTGGTTTTGCCTGTTCCTGCTTTCAATGTCATTAATGGTGGATCACATGCTGGAAACAAACTTGCTATGCAGGAGTTTATGGTTCTTCCNGTGGGAGCTTCCTCTTTCAAGGAAGCCATGAAGATGGGTGTAGAAGTATATCACAATTTGAAGTCTGTGATTAAGAAGAAATATGGTCAAGATGCAGTAAATGTTGGTGACGAAGGTGGCTTTGCCCCTAACATCCAGGAAAACAAGGAAGGTTTGGAATTGCTGAAAACTGCCATTGCCAAAGCTGGTTACACAGGCAAAGTTGTCA…
Gma.2987.1.S1_at	CD393690	At1g14450	1e-19	Energy			GGGATCTGGAAGTGGAAAACACACTGGAGAGTTCTTCAGGAGAAGGGATGCATGGAGGAAGCATCCGATGCTCACCAATCAGCTCCGCCACGCCACCCCTGGCCTTGGCATCGCCGTCGTCGCCTTCGGTATCTACCTCGTCGGCGAACAAGTCTACAATAGGCTCTATGCTC
GmaAffx.90090.1.S1_s_at	CF805815	At3g04780	4e-09	Energy			GATCGTGCTGCATGGTACAACAGTTGAAACAACAGACATGAAGGGTCTGAAGAAGATTGAGGATCATTAACCCCTGGAAAGAGGAGATTCAACTTTGCTCCTAATCCCTCCTTAGAAATTTTGATTGGAATTGTAATGTTAACTTGGTGAATGATGGTTTATGACTTCTAATGTCTATCTG
GmaAffx.75782.1.S1_at	BQ742018	At3g07480	1e-50	Energy			TGCGCGGCCCACTGCGAGGTCAACATNGCNCAGGAGTGGCTCGACAAGCTACCCCCTCGCTCCTACGACGAGGAGTACGTCCTCGTTCGCAATTCCCGAGCAAGGGTCCTCAACAAACACTCCAGGCTCGGATGCCAAGTTCTCCTCGACCNCGACCTCGAAGGTATGGTCGTTGCCCTCCCCGAACCTAGGCCCTGGGACACTTCCTAAGTCCGAACCTAAGCCAAGTGTTTATTTTCTTTTTTTGGCTCAATAATGTGATCCATGAACCTTTGGAAGCATAGCGGAACTCGGTGAACCTTGTATTGGTTTCTTCCTGTTGTTATATTTTGGGTGGTTTTAGACTCTTGTGCCGGTAATTGGCTCGCTATGG
Gma.7397.1.S1_at	BI970483	At2g20360	7e-66	Energy			GATATGTGAAGGTGCCTTTCCCCATTGCAAAGGCATTGGCAACACCAAGAGAAATATTACTAAACAAGGTCCCCTTTCCACTACCTGTTCCTGAGATATTAAATCTGGATAAGATCCAGGCTTTGACTACAGATACCGTTGTTTCAGAAAATGCTTTGACTTTCAATGATCTTGGAATTGTTCCTCACAAGCTGAAGGGATACCCTATTGAGTTTCTTATCTCATATAGGAAAGGAGGCCCACAATTTGGTTCTACTATCAGTGAAAGGGTCACTCCAGATTCTTGGCCGTAAGATTCTTTGGATGTTTGATCCTGAATCATTTTTCTGTCTTGCTTGTACTACCACCATTTAATTT
GmaAffx.93110.1.S1_x_at	CF808835	At3g15640	2e-25	Energy			ATAAAAGGATAGTCGGATGCCCAGGAGGTGAAGGTGAGGATGAGCATGATGTTGTCTGGTTTTGGCTGGAGAAAGACAAGCCCCATGAATGTCCAGTGTGCGCACAGTATTTTGTTCTTGAAGTGGTAGGACCTGGTGGACCACCCGATGGACATGGTGATGATGATCACCATTGATTGCATCCTTCAATTAAATCTGG
Gma.6660.1.S1_s_at	AW348858	At4g10040	5e-55	Energy			ATATCTGAGAGAATCCACTGCACAGTGATTATACATTTTCATACATTCAATTTTTGCAGTGTGCTTTCAAAGTTCTGGAGATTTAATTTTCGGTCATTTAGTTCTGCCATGCAGGAAGTGCTGTATCTTTGGCAAATAATGTAGGCTACATTGGTCTACAACGCTATTTTGTTCATTTTGCATTGCCTCTAAAAAAAACAGCCGAATATTGGCTGGTGTAACAAATTATCTCTTTA
GmaAffx.59019.1.S1_at	AW133348	AtMg00160	2e-73	Energy			AAGTCATCCCTACAATAGCCCCTTGTGATGCNNNNNAACCATGGCAACTAGGGTTTCAAGATGCAGCAACACCTATAATGCAAGGAATAATAGACTTACATCACGATATCTTTTTCTTCGTCATTCAGATTGGAGTTTTTGTATCATGGGTCTTGCTTCGTGCTTTATGGCATTTCAGGTCTAAAATGAATCCAATCCCTCAAAGAATTGTTCATGGAACAACAATCGAGATTCTTTGGACCATATTTCCTAGTGTCATACTAATGTTCATTGCTATACCATCGTTTGCTTTGTTATACTCAATGGATGATATTGTAGTGGATCCAGCCATTACTATCAAAGCTATTGGACATCAATGGNATTNGGACTTATGAGTATTCAGACTATAACAACTCTGAT…
GmaAffx.13837.1.S1_at	BI426968	AtCg00670	7e-90	Energy			AAATTTATGGTTTCGATTGGTGCAAACCCAATAGTCTTNATTTACAATTTAAGATGAGAAGGACTTTCCCATCGGTAACAAAACAAATATAAAGTTACCCGTTAAGCGGAGAAAATACTATTTCAATTAAAGATAAAGTATGTCCTTAATGAATGAATTTTGATGGATTTTGGACGAACGGAATAAGAAGGTCAGCTACCCAGCAAATTTTCATAATTAAATACCGTTACTGTATAACTAGATTTCATTGTGAAAAAATCTACTTACTAAACTAAATATTGGATGGGTAGAGCCAAAGAGTGTGAACTGTACAAGTTAACAATAACATTAATTAAATTAATAAAAAATGAAAAGAAAGAAAGGCTCCGGTGTATAGAAAGGACCTGCCCGTTTCTAAAA…
GmaAffx.80404.1.S1_at	BM085436	AtCg00670	6e-06	Energy			CTTGGGTTGATATATAGTGCGACTTGTCAGATATAGTAGGTCATATGGGATTTCCCCGTTTTCTCCCCCGATCGAGATATCCTCTCTTTCACCCCCAAAAGAAGAATGATTGAATCATAAAAAATTTGGAGCGTGAAGTGTAATGAAATAAANTNNTATCGATTTTTTTATTTTTAGAGGTGGTATCCAGATTATTACTCGAAATTATGAATAATTTATGGTTGGCTTGATTGAACCAATAAAATAAAGTACCCAGGCTCTGTTTAGAAAAAACCAATTGGTAATATATCTACGATCACCACTTCTATCATATCCGTATATTTTACAGAAAATATTAAATAAGAAATTCAGAAAAGGAAGAAGTTTTAACAAAAATACGTAGTATTGTAATATTTGTCC…
Gma.10919.1.S1_at	AW348585	At5g53560	7e-35	Energy			ATCCTGGAGGAGATGAAGTTTTGGTAACGTCAACAGGGAAGGATGCCACCATTGATTTTGAAGATGTGGGCCACAGTGATTCTGCCATAGAAATGATGGAAAAATACTTCGTCGGGAAGGTTGACACTTCCACTCTTCCAGCGAAAGTTAACCATAGTCTGCCACAACCTACACAAGCAGGTGGCGCTGGCAATCAATCTTCTGGATTTGTTGTAAAGATCTTGCAATTCCTGTTGCCATTCTTGATATTGGGCCTTGCCTTTGCCCTGCAGTACTATGGCAAAAAGAAGCATGCTAGCACCTCATGAAATATGAAGTTGAGCTAGAGCCGAAGTTTCATTAGGTTTGTTAATTCATTGCCTACTTCAATGCAGTATTAAAGNGGTAATAGACTTTAGT…
Gma.10919.1.S1_s_at	AW348585	At5g53560	7e-35	Energy			GTCAACAGGGAAGGATGCCACCATTGATTTTGAAGATGTGGGCCACAGTGATTCTGCCATAGAAATGATGGAAAAATACTTCGTCGGGAAGGTTGACACTTCCACTCTTCCAGCGAAAGTTAACCATAGTCTGCCACAACCTACACAAGCAGGTGGCGCTGGCAATCAATCTTCTGGATTTGTTGTAAAGATCTTGCAATTCCTGTTGCCATTCTTGATATTGGGCCTTGCCTTTGCCCTGCAGTACTATGGCAAAAAGAAGCATGCTAGCACCTCATGAAATATGAAGTTGAGCTAGAGCCGAAGTTTCATTAGGTTTGTTAATTCATTGCCTACTTCAATGCAGTATTAAAGNGGTAATAGACTTTAGTCAATGTTGTGTGTCTGTCATTTAAACTC…
Gma.17933.1.S1_a_at	CD395441	At5g53560	2e-42	Energy			TTTGTTATCTGCAACAGGGAAAGATGCAACCAATGACTTTGAAGATGTGGGGCACAGTGATTCTGCTAGAGATATGATGGAAAAATACTACATTGGTGAGATTGATGCATCAACCGTCCCACTAAAACGGACCTACATTCCACCTCAGCAAGCTCAGTACAATCCTGATAAGACTCCAGAATTTGTGATCAAGATTTTGCAGTTCCTGGTCCCTCTCCTGATCTTGGGCTTGGCCTTTGTTGTGCGACACTACACCAAGAAAG
Gma.1186.1.S1_s_at	CD411934	At2g32720	3e-59	Energy			GATGCAACCAATGATTTTGAGGATATTGGTCACAGCACCAGTGCCGTAGCCATGATGGATGAGTTCTATGTTGGAGACATTGATACATCAACCATCCCCAGCAAGGTTAAGTACACTCCTCCAAAACAACCTCACTATAACCAGGACAAGACTCCGGAGTTCATCATAAGGATCCTCCAGTTTCTAGTTCCGTTGTTTATCTTGGGTTTGGCAGTTGGCATTCGTTTCTACACCAAATCAACAT
Gma.13980.1.S1_at	CD412403	At1g14730	2e-41	Energy			GCCCCATGGCACGTAGCAGGTGGTAGAGCACTATTTTTCATGGCAATATGTGCTGCACTAACAGGGTTGATGGAGAAGTATACTATGTTAAAACCCGCCCTACACCAGAGAGAATCTCATTTAATCAACTTCACGGGTCTAGCTATTCTCTTGTTTGGAGTCTTTGTGGATATGGCAGTGGGTTTGGCCCGTTATGCCTGAAATATTACTTCATTTAATTTTCTCCACTTCCATGTACTTTATTCCAATTCGATTGATCCAGCATTTCTACATTTTTTTAATTTTTATTTTGTTATTGTGTTTTTATTTGCTGGAAATGGCTTGTGTAATTTTATTTTTCTTACTATCTTTTGGACTTTTGTGGGATATAAGTTGACTCTTGTGGAAATGATTTGTTTT…
Gma.3774.1.S1_at	BU550698	At1g60420	1e-78	Energy			GTCTTCCGGCATTGGTGTATCATGAAGGGCACCGCCATGATCTGAATTTGGTGTCTGATGGAAACGGTGGAGGGCCCTTTATTTGCTGCGTATGTGATGAGCAAGGGTCTAGTTGGGCCTACCAGTGTCTCCAATGTGGCTATGAAGTGCACCCAAAGTGCGTCAGAACTGTGGAACGTCATGACAATAATGTCTAGGAATTTTTTAATTAAATTCCTGTGGCAATTAATTCTATATCCTGTGTTACCGTCCAAGAGGGGCGATAACTTGACTTGGCTGTATCCTAATCTGCACCAGGGAAGGGACTGGAATGCCCTTTAGATAAATTAGATTACGTATCTTTATGGTGCTTTTCTACTTGTTCAGAATATGTGTGACTGAGAGTCATAAGAAGGAAAG…
Gma.11940.1.S1_at	BI942780	AtCg00480	1e-76	Energy			GGAGCTGCCCTAAGTGTTCCAGTAGGTGGAGCAACTCTAGGACGAATTTTCAACGTGCTTGGAGAGCCCATTGATAATTTAGGTCCTGTAGATACTCGCACAACATCTCCCATTCATAGATCTGCGCCTGCCTTTATACAATTAGATACAAAATTAGCCATTTTTGAAACAGGAATAAAAGTAGTAGATCTTTTAGCTCCTTATCGTCGTGGAGGAAAAATAGGACTTTTCGGTGGAGCTGNANNNGGTAAAACGGTACTGATTATGGAATTGATCAATAACATTGCCAAAGCTCATGGAGGTGTATCTGTATTTGGCGGAGTA
Gma.11940.2.S1_at	BE440563	AtCg00480	1e-144	Energy			GACTTTAAATCTTTGTGTACTGACCCCCAATCGAATTGTTTGGGATTCGGAAGTGAAGGAAATCATTTTATCTACTAATAGCGGACAAATTGGAGTATTACCAAATCATGCGCCTATTGCCACAGCCGTAGATATAGGTATTTTGAGAATACGTCTTCTTAAAGACCAATGGTTAACGATGGCTCTGATGGGCGGTTTTGCTAGAATAAACAATAATGAGATCACTGTTTTAGTAAATGATGCGGAAAAGGGTAGTGACATTGATCCACAAGAAGCACAGCAAACTCTTGAAATAGCAGAAGCTAATTTGAATAAGGCGGAAGGCAAGAGACAAACAATTGAGGCAAATCTAGCTCTTAGACGAGCTAGGACACGAGTAGAGGCTATCAATGTGATTTC…
Gma.1201.3.S1_at	AW733664	At3g06650	1e-167	Energy			ACGCTCCATTGGTCTGATTGGGCACACCTTTGACCAAAAGCGATTGAAGCAACCACTTTACCGTCACCCATGGGAGGATGTTCTCTACACAAAGTGAGNAAGTTTTGTGCGACTGTAAGAACTTTGNCATGCTTCAAATTAGCAATCTTTTGGGAAATCATGCACATCTGAAATATGCTGGAGTGGTTTTGTAGCTGTTAGACTAGTGTTGTACGATCTATTGGTGAAAAGTCATCTTCCATTTGTAACTTGTAT
GmaAffx.26088.1.S1_at	BI970414	At5g65750	2e-42	Energy			TCAAGGTTCACCAGAAGGAGCAGACTGAGATTGCTGAAAAAGCCNTTCAACANGAACCNATCGACTTCCCATTTTGAAAANNCNTTTGCACATGCATCCATCTTTTTTGAGAGTGATAATAATGCATTTAGTTTAATTTATCCACCACGTAAGNNGCTATAGTTGGAAGGAAGGNGACNTCATACATTTGCTTTCNAGTTTTGACCTTTTNTNATNTTNTNNNGGTTCCTTNCAAAAAGTNNGNTAAGCTGAATTTCAACATNCNTATGCTGAAANTATTTNTATTTCCTTGNNNCGATANGCAAAGGCGTGGTTGNCTTACTNGNTGAATTGATGCCNNNNNNNNNNNNNNNNNNNNNNNNNNNNNNNNNNNNNNNNNNNNNNNNNNNNNNNNNNNNN…
Gma.17706.1.A1_at	BI943579	AtCg00500	3e-67	Energy			TCTTATTCTGGTATGTGCGTCCGGAGGAGCGCGTATGCAAGAAGGAAGTTTGAGCTTGATCCAAATGGCTAAAATCTCTTCTGCTTTATATGATTATCAAAAAAATAAAAAGTTATTCTATGTATCCATACTTACATCTCCCACTACTGGGGGGGTAACTGCTAGTTTTGGCATGTTGGGGGATATCATTATTGCCGAACCAAATGCTTATATTGCATTTGCTGGTAAAAGAGTAATTGAACAAACATTGAATAAGGCAGTACCTGAAGGTTCACAAGCAGCTGAATATTTATTCCATAAGGGCTTATTTGATTCAATCGTACCGCGTAATCTTTTAAAGGGCGTTCTGAGTGAGTTATTTC
GmaAffx.92910.1.S1_s_at	CF806558	At3g52300	6e-58	Energy			GAAAATGAGCGGAACGGTGAAGAAAGTNANCGATGTAGCATTCAAGGTGGGAAGGAACATCGATTGGGATGGAATGGCGAAGCTTCTNGTCTCCGATGAGGCTCGCAGGGAGTTCTCCAATCTCCGTCGCGCTTTCGACGAGGTTAACTCCCAACTCNAAACCAAGTTNAGCCAGGAACCTGANCCCATNGANTGGGATTACTATAGAAANGGAATTGGCACTCGNTTGGTGGATATGTACAAGGAGCATTATGAGAGCATTGAGNTCCCCAAGTTTGTTGANACAGTAACTCCTCAATANAAGNCTAAATTTGATGCCCTNTTGATTGAGCTTAAAGAAGCAGAGGAGAAATCTCTGAAGGAGTCTGAGCGNTTGGAAAAGGAAATTGNTGAAGTACA…
Gma.11258.1.S1_at	CD403347	At5g47030	8e-66	Energy			CTAGCTCAAGGATGTTGGGCAAGACCTTGAAATTAGAA
GmaAffx.92392.1.S1_at	CF808114	At5g47030	2e-63	Energy			CCAGAAGGGTCTCCAAGAGTTCACTCAGAAACTGAACTCAGCCACAACTGATTTGGAGAAAGCTGAAGCTCAGATTGGGGNTTGATGTCCATAGNGCTCTNAACTCTGCTCTTNCAGGCTAATAATAAGTACTGTAGTGGTAAGTCTTTCCTTCTGTATTTGGTTATTTCCCCCCACTATGTGGCATTGATTTGTCTCGGTGTAATCAAAGTTGCTAAAAGAACATTTTCACCATGAAATTCTATGTTGAAAGTGACTTGAT
Gma.11271.1.S1_s_at	CD416236	At1g51650	2e-30	Energy			AACATATGCGCGAATCTGGTCAGGAATTGCCTCAAGGAACCCTACAAGGCTGAAGCCATCTCTCGTGAGAAGGTCCATTTTGCTCTCTCCAAATGGGTCGACGCCAAGCCTGAAAAACCTACTATTCGTTCAGACACCCCAGAGCAGTGATCCGGAATAGTTGGAAGCTATAAATGCATAAATCTTTGAGATCTGGAAGTTCATTGTCATTTTGAACCTTTCTGTGATGTTTAATTCC
Gma.17682.1.S1_at	BG839162	AtCg00120	0	Energy			CAGACCCGCTATTAATGTAGGTATTTCCGTTTCCAGAGTTGGATCGGCGGCTCAAATTAAAGCCATGAAACAAGTAGCTGGTAAATTAAAATTGGAATTAGCACAATTCGCAGAATTAGAAGCTTTTGCCCAATTCGCTTCTGATCTCGATAAAGCTACTCAAAATCAATTAGCAAGAGGTCAACGATTGCGCGAGTTGCTTAAACAATCCCAATCAGCTCCTCTTACCGTGGAAGAACAGATAATAACTATTTATACTGGAACGAATGGTTATCTTGATTCATTAGAAATTGGACAGGTAAGGAAATTTCTTGTTGAGTTACGTGCTTACTTAAACACGAATAAACCTCAATTCAAAGAAATCATATCTTCTACCAAGACATTCACTGGGGAAGCAGA…
Gma.7343.1.S1_a_at	BU548960	At4g21090	5e-65	Energy			TTGCGTGTTCAACTTGCCATGTTATAGTCATGGACGTAGAACAATACAATAAATTGGAAGATCCAACTGATGAGGAAAATGACATGTTGGATCTAGCTTTTGGGCTTACTGAAACATCACGTCTGGGTTGCCAAGTGATTGCTAAACCCGAACTTGATGGAATTCGTTTAGCTATTCCTGCTGCCACTCGGAACTTCGCTGTTGATGGTTATGTGCCGAAAC
Gma.3856.1.S1_at	BE822875	At3g51390	4e-12	Energy			GTACAAGGAGCACCATATACGGAGTCGAACCATTGCCTACCCCTGAAGAGATAGAGGAAAAATCAAGGCCGTACACATGCTTGGATGCTGTAACTNNNNNNNGTTNTTNNTNNTTTTTGTACAAGTAGAAGTCTTTCCGTCTAGTAGTTTAATCGTGAAAACTCAGAAGTATGTCGATGTACCCTTTTGCTTTAGATGGGTAGGTGTTATCTTTAGGCAATTTGCTTCATGACATCTTCTGTTCTTCATTTTTTCCCTAAATTTTGGAGGTAGAGTTCCAAGTTAGATGTACAGTTGCAGTGCTATTGTGTTGTTTTGTTTTTACTGTTTAGTCTGTAGACCTGGATATCCAGCTATTATCAAACCGACTACTGCCTGGAACGCTAGAGAC
Gma.1488.1.S1_s_at	AW394837	At5g08290	1e-79	Energy			ACGACTGGGACGAAACCTGCATGCAGATGGACGAGGTGTTGGCGTCAGTGGCGGAGACGATAAAGAACTTTGCGGTGATATACCTGGTGGACATAACGGAGGTGCCGGATTTCAACACCATGTACGAGCTCTACGACCCTTCCACGGTGATGTTCTTCTTCAGGAACAAGCACATCATGATTGATCTCGGAACCGGTAACAACAACAAGATCAACTGGGCTCTCAAGGACAAGCAGGAGTTCATCGACATTGTTGAGACCGTCTATCGTGGAGCCAGGAAGGGACGGGGTCTCGTCATCGCTCCCAAAGATTACTCCACCAAGTACCGTTACTAGT
Gma.7097.1.S1_at	BG047373	At4g02620	4e-56	Energy			GACAAATTACCTCATTGTGGATTCAAAAACAACNGTCAAACAAATTGAGGATGCATTCAAAGAATTTACAACAAGGGAGGATGTTGCAATTGTGCTGATTAGCCAATATGTTGCAAATATGATAAGGTTTTTGGTTGATAGNTATAACAAGCCNGTTCCTGCAATACTTGAAATCCCTTCTAAAGANCATCCTTATGATCCNGCACATGATTCNGTTCTGTCACGAGTGAAGTATCTCTTCAATACCGAATCAGTTGCATCTGGGAGACGCTGAATTCACCNTTTNCAGTTGCAGCTTTTTGGGGGTGTTTGTTGTTTTTCTTTGTACANTATGGNTAATAATCTTTTCTTGAAATTCAGAGTTCTATGTAGATGTAGCTTAAATAATTTGTGCTGTCT…
Gma.5672.4.S1_at	CD396011	At1g75630	4e-47	Energy			TATGGCCGGAGTGTTGGGAATCTACGGCTTGATCATCGCCGTCATCATCAGCACCGGNATTAACCCTAANGNCCAAATCCTATTACCTCTTCGACGGCTACGCTCACCTCTCCTCCGGCCTCNCTTGCGGNCNTNGCTGGCCTCTCCGCTGGCATGGCCATTGGCATTGTTGGCGANGCCGGTGTTAGAGCAAATGCCCAACAGCCAAAGCTTTTTGTTGGGATGATTCTCATTCTCATCTTTGCTGAGGCGTTGGCATTGTATGGACTCATTGTTGGCATCATCCTCTCTTCNCGTGCTGGCCAATCCAGAGCTGATTAGTATAAAATTTCCTGTTNNNTGCNGCGCACAGAACCATGAATTGGANGGTGAATGTCGCCGGGGACTAGGTCATGTTAA…
Gma.17869.1.S1_at	AW156331	At1g12840	6e-14	Energy			TAATAGTACATTCTATCCTTGAAGGGTTGACTGATAGCACAAACAGTGCATACTGGAAGACCGAGGATGAAGTAGGTGCCGGGATGGCTGGCCTAGCAGGTGATGCCGATGCTCACCCCTATGTGTCTTTCACCATCAATGTTGCTTGAGGGCTCTCAGAAACCAGCCCGATACTTAATTTACAATCCATTATGGGCTCCTTTGGACAGCAATAATGCCAATGCAAACAGGATTTGAAGAAGATATTGNTNCATNACGATCATATTTCATTCTTTGTTATTTATCTATATAATTGAAGCGATCAAAGTTTCAAAAGGGTTTAATGAATTTCAAGGGTAGCGTCTGGTGCCAGGATTGACCATTAGCAACTTGTATTGTTTCGTGTAAGTTTTCTTGTCG…
Gma.15220.1.S1_s_at	CD398333	At4g05000	1e-92	Intracellular Traffic			GGAATTAATGGTGGCATGGCTTTGAGGGAAGGNNNNTGATGCATCTGGCAGGAAAGGAAAGGGAAAGGGNGTTTACCNAGTTTGTAGACAAATACGGTGCTAATGTCGATGGTTACAGTCCTATNTACGACACCAAGGACTGGTCTCCAACCGGTGATGTCTACGCTGGCGGTACGACTGGCTTGGCTATCTGGGCT
Gma.5837.1.S1_at	CD417104	At1g71270	1e-76	Intracellular Traffic			GAGCCACTAGTGAAGGATTTTGCGAGTAGGTGGAAGGCTGCAATAGAGCTGATGCATAAAGACGTTATCACTTCTTTCAGCAACTTCTTGTGTGGTATGGAGATNTTAAGGGCTGCNTTGACTCAGTTGTTGCTTTATTACACAAGACTCTCGGATTGCATCAAGAGGATCGTTGGTGGTTCTGCATTGAACAAGGATCTTGTTTCCATATCTTCAATCATGTATGAAATTAGGAAATACTCGCGGACTTTCTAATTTGTCGAAGATGCCATAGTTATATACTGGATCTAATTCACAATCAATGATATTCCATTCAGTATTATGCCAAAAAACAACTCTCTTGGATCCTGTATGTAAACGAAAGATAGTTTGCTTCTTTCGGGACACCCAAATAAGTGA…
Gma.13222.2.S1_at	BE440348	At1g11890	1e-100	Intracellular Traffic			GTCTTCCTCTAGCTGAAGGTCTGGATGATGGTCGTGATCTTAAAGATGCGGAATTTTACAAACTGCAAGTCAAGGCTTTGTTTAAGAATCTCTCAAGAGGACATTATGAAGCATCAAGGATGTCAGTTGAAACTGGCCCTTATGTTTTTCATTATATTATAGAAGGACGGGTCTGTTACTTGACAATGTGTGATCGTGCATACCCTAAGAAACTAGCCTTTCAATATCTTGAAGAGCTNAGGAANGAGTTTGAGCGTGTTAATGGGTCTCAAATTGAAACTGCTGCNAGACCTTATGCCTTCATTAAGTTTGATACATTTATGCAGAAGACAAAGAAACTTTANCAGGATACNCATACTCAGCGCAATATTGCAAANTTGAATGATGAACTCTATGAAG…
GmaAffx.90362.1.A1_at	CF806087	At1g11890	5e-29	Intracellular Traffic			AAACTATGGTGATCGAGCTCAGTATGAAATTTAAAACCTGGATTCTGTGGCTTCTTGCTTTTCTCACATGATTATCCAGATTTGCACAGATTGGTGGGAACCCTTTATGCATGAGATGATGTCAACTTTTTCTTGACAACTTCGGTTTAGAAAAAAAAAAAGACTATCCTTTGTTACATCTGGATCAGTCTTTCTGGAACAGGAACCTTTTGACCTTTATAGTAAGGAGCCAGGATATGAGAAAACTTTATCCCCGTGGGGATGCATGTAGGCATTTCTTCTTTATACTTCTCAA
Gma.733.1.S1_at	BM178504	At2g45140	3e-60	Intracellular Traffic			AAGAGGGAAGGCAACAAAAGTCGTGGTGGAGTCTCATTTGTCATTGTCGTATTAATTGGCTTGCTTGGCATAATTATGGGGTATCTCATGAAGANNACCTAAGCATTTCTGCGATTCAATCTTTCACCATAGTTTTCGATCTTAGTTTCTTTGTTCCTNACNATTCAAGCAATNATGAGGAAAGTTAAAATAGATCAATTCAGCAGATGTTGGTTTTTCTTTTTNATTTTTGCNNTTTCTTTTCTTTTCTTTGGGTGGATAACATTTTGGANGTAGAAAACATTAGGGGAAGTTGTGGGTCTGNTGGTTAANCATATTGTGAACTGACTCATNCTTTCGTNAACNTGCATTCTTTTTGTAACTTAANGAGGGGAAGCTTCTTGTTTNCTTCTTTTTGTG…
Gma.13515.1.A1_at	CD400856	At4g04910	2e-28	Intracellular Traffic			GTCCTAGAACAGTTGAATGTGTTTACTGATGAAGATATTGATTCTGCTGCAGAGGCGTTGAATGATATGCCTATCAGGAAACTATACATGTTGATCGAGATGGCAGCGCAAGGGGAGCATGGTGGATCTGCAGAAGCCATCTTTTCTGNNNNAGNGAAGATTAGTATCGCTCANTTCTATGATTGCCTCCAGGATGTTGTTAGGTTATAAGTTGTTGTATTAAGCGCTTTCTAAGTTAGAGTGCATATAATCCTTATTGAGTTGAAATCTTTTTTTAACAGTTCATTACATTGCTTGNTNCGGTTCAGTTACAGAGATTTTTTTGAATCAGTGTTTGTTTGGTTGTGCTGATAGTAATTTTGAGAGGAGGCAGGGGTTTCGTAGTCTCATGTTTTATCT…
GmaAffx.93059.1.S1_s_at	CF808784	At4g04910	1e-65	Intracellular Traffic			CACCATTGAGTGTCATCATTCTTGATGACATTGAGAGATTATTGGAGTATGTGCCCATTGGTTCTCGATTTTCAAACTTTATTTCTCAGACACTACTGGTGCTGCTTAAACGGCTTCCTCCAAAGGGGAAAAAACTCATGGTTATTGGCACAACAAGTGAACTAGATTTCTTGGAATCAATTGGATTTTGTGATACCTTCTCTGTTACTTACCATATTCCTACATTGAACACAAAGGATGCAAAGAAGGTCCTAGAACAATTGAACGTGTTTTCTGATGAAGATATTGATTCTGCTGCAGAGGCATTGAATGATATGCCTATCAGAAAGCTATACATGTTGATTGAGATGGCAGCGCAAGGGGAGCAAGGTGGATCTGCAGAAGCCATCTTTTCTGGCA…
Gma.6613.2.S1_at	BG789774	At5g65020	1e-121	Intracellular Traffic			ACAACAATGAGTTCGGGAATGCCATAAACAAGGATCTGAAAACNGATCCAAAAGATGAATATCTGCAATTATTGAGGGCAGCCATTAAGTGCTTGACTTACCCTGAGAAATATTTTGCNAAAGTCTTGAGGNTGGCTATAAACAAGCTNGGAACTGATGAAGGGGCCCTTACTAGAGTGGTGACNACCAGAGCTGAGGTTGATTTGCAGCGAATTGCTGAGGAATACCAAAGAAGAAANAGCATTCCTCTGGACCGCGCAATAGCCANTGACACTTCTGGAGACTATCAGAGCATTCTCCTTGCACTGGTTGGACATGAGGATTAAGTNTTCTTTCTTANNCTNTTCAGTTGTCATGGGATTGNTNNTTAGGCTATTTGCTTTTCCTCTTATCATGAAT…
GmaAffx.89049.1.S1_s_at	CK606168	At2g38750	2e-94	Intracellular Traffic			ACATCTCCAGGCAGTTTACAAGCACTATAAAGAGATATCTGGCAAGAACCTTGATGAGGATCTTGATGATTTAAGATTTAAAGAGGCTGTGCAATGCCTTTGTACCCCACAAACATATTTCAGCAAGGTTTTNNATGCAGCATTGCGAATTGATGTGGACAAGAATACTAAGAAATCGCTTACTCGTGTCGTTGTTACTCGAGCTGATATTGATATGAAAGACATAAAGGCAGAGTACCATAATCTATATGGGGTTTCTTTACCCCAGAAAGTTGAAGAGGTTGCTAGAGGGAGCTACAAGGATTTCTTACTAAACTTGATTGTTAGAGGAGGCTAATTGAAGAAATTGAAAAGAGAACAAAAACTTGGAAGATCAAATAAAAAAGGAAAATTTTTTCC…
Gma.385.1.S1_at	BE347563	At1g68090	8e-97	Intracellular Traffic			GGGCCTTTGAACATGCACTTTTGACAATAATCCAATGTGCTGTTAATCCAGGAAAGTATTTTGCAAAGGTGTTGCATAAGGCGATGAAAGGCTTGGGGACTGATGATTCCACACTCATTAGGGTCGTTGTGACAAGGACTGAGGTTGATATGCAGTATATCAAAGCTGCATATTTAAAGAAACACAAGAAGACTCTGAACGATGAAGTACACTCAGAAACATCCAGTCACTACAGGACTTTTCTTCTCTCACTTTTGGGCCCTAATCACTAGCCAAGATGTTCAATGATGTAAGTGGAATAAATTCACCCTTGATGTGTAAATTTGACTGTTTTTAGTGCTTTGTGATCAATGTAGCCGACAACTTGT
GmaAffx.1301.68.S1_s_at	BI974374	At5g10230	6e-57	Intracellular Traffic			GATGAGGTCAACTTGACCCTGGCAAAAACTGAGGCAAAATTGCTGCATGAGAAGATTTCAAACAAGGCTTATAATGATGACGACTTCATCAGGATTTTGGCCACAAGGAGCAGAGCACAGATTAATGCTACTTTGAATCACTACAAAGATGCATTTGGACAAGATATCAACAAGGACCTGAAGGCTGATCCAAAGGACGAGTTCCTGTCTTTACTAAGAGCAACTGTGAAGTGCTTGATCCGTCCCGAGAAGTACTTCGAGAAGGTTGTTCGCTTGGCGATCAACAAGCGAGGAACCGAT
Gma.6811.2.S1_a_at	AW100836	At5g12380	5e-95	Intracellular Traffic			GCTACAGAGAGATCCATGGCACTTCCATCTCTAAGAAACTGGTGGATGAAGGATCTGATGAGTTTCAAAGGGCATTGTACACTGCCATTCGTG
Gma.13131.1.S1_at	CD411154	At5g11490	3e-61	Intracellular Traffic			GTATAATCAACACATCGTCAGCCAAGTCACAGATTAAAATAAAAGCTGATGACCAAAGTTCATCCCAGGCATTCTCTACTTTATTCCAATCAGCCTTGTCCAAATTTGGTTTACCTTAAATCTTTATGGTGCCTTCAGAGCTTTGAAATCAGCTGTTATGAAATGTTGCAATCCTAGATTGAATATATAAGGGAATGGAGGATATTGACTCCATACCTCCCCCCTCCCCGAAAGAGAAAGAAAATTCAGATTGATGTATAACAGGAAAATGCAGGGGGGTTCCATTGGCTAAAAGATTTTGTAGTTGTTCTGTATCCNAATCATCGTGATCCATCAAATATTCAGTTGTAGAAAACCTAGTCTGGGTTGCAAGTTTGTAGAGGTTTTATGTTGATGTTC…
Gma.1630.1.S1_x_at	BF596536	At3g62290	1e-99	Intracellular Traffic			GTGGCCAAGATAAGATCCGTCCTTTATGGAGACACTACTTCCAAAACACTCAGGGGCTTATCTTTGTTGTGGATAGCAATGATCGTGACCGTGTAGTTGAGGCTAGAGATGAGCTCCACCGGATGTTGAATGAGGATGAGTTGAGAGATGCTGTTCTCCTGGTATTTGCCAACAAACAAGATCTTCCAAATGCTATGAATGCTGCAGAAATCACAGACAAGCTTGGTCTTCATTCTCTACGCCAACGCCACTGGTATATCCAGAGCACATGTGCCACCTCTGGGGAAGGACTATATGAAGGGCTGGACTGGCTCTCCAACAATATAGCTAACAAGGCTTAAGGGACATTTTGTGGAATGCCGCTATCTTCTTGCTTGGCTTTACGATT
Gma.4707.2.S1_at	CA783500	At3g62290	1e-100	Intracellular Traffic			TCTTCATTCTCTTCGTCAGCGTCACTGGTATATCCAGAGCACATGTGCCACATCTGGTGAAGGGCTTTATGAAGGGCTTGACTGGCTCTCAAACAACATTGCAAACAAGGCATAGTGATTATCGGTCATGGGTTGCATCAAAGTTCATTTGAGTTTAGCGGTTGTGACTTCCAATGTTTGATGTGCTTACCCTGTTTAGAATCTTATTTTCTCTAGCATGTATTATTTGTCTTCGATAAAGAACAGATTGTCTACTACCTAATATCAAAATAATTTGCATTTTTTCTCCGTGTANAACCAAAAGGCATTTGTCTTACCCATCGATTTGTGA
Gma.6298.2.S1_s_at	BU080611	At3g62290	1e-100	Intracellular Traffic			GCTTTTTGGGTGTCTTGTGGATGCAGGGGTGAATATTATCTGGTTTTNTTTTTTGGTTCTCTTCTGAGACACATTGGCTTTATGTTCATGTTTTCTGGTTTAGGACATCTTGATGGCTAAAATTATAGCAGGAATTTGTTTCATGGGATGTCTAATACTTTTGAGTTTTTTTATTGGGCTTGGATT
Gma.11398.2.A1_s_at	CD413467	At2g47170	1e-27	Intracellular Traffic			TAATGCCTTTGGGAGTCTTGCGGATTGGTAATTCTGGATGCAGGGGTGAACATTATCTAGCTTTTATTTCTTGGTCCTCTTCCAAGACAACTCGAATTTGTGCTCATGTAATGCGGTTTAGGACATCTCGAATTTGTGCTCATGTAATGCGGTTTAGGACATCTCGGTGCTAAATTGTAGTAGGATTTTACTTCTTGGGATGCGTAATACTCTGATCTTTCTATTGGGTTTGGATGCAATGTCCATAACTGTAATGGAGATACTAATTCAATGCGCCACCGGGTTCTGTCTGATTTATAGTTTTA
GmaAffx.5931.1.A1_at	BI967201	At3g03120	8e-25	Intracellular Traffic			ATATAGCATACTTTTCCTCTTGAAAAAAATNTTCTCCTCAAACAATGAGTTTTGCATTGTGCTCTAGTGTGGTTATAATTGTTAACATTTTCTTTTTCTTTTGTAGAGAGGGGCAATGACGCCAATGGAAGTGTGTGAAGNACTAGGTCTCTTTGATCTAAAGAATAGAAAATGGCACATACANGGCACTTGTGCACTNAAGGGAGATGGTCTTTATGAGGGCCTGGACTGGTTGGCTTCAACACTGAAGGAAAGAAAAGCTGCTGGATACTCTTCAATAGGAACCTCATCCTTCTAATNTAGGTATNNNNNNNTTTGTCATTGAGGAACGTGCAGGGTTTGGCCAGTTTCANTCAAGGATGTTGTAAAAAAGTAATCAANTTTNNNGAGTTNCATTNN…
Gma.1630.2.S1_a_at	BI424237	At5g14670	5e-60	Intracellular Traffic			GCTGGGAGAAATTGTCACAACCATTCCCACAATTGGATTCAATGTGGAGACTGTGGAATATAAGAATATTAGCTTTACTGTATGGGATGTGGGTGGCCAAGATAAGATCCGTCCTTTATGGAGACACTACTTCCAAAACACTCAGGGGCTTATCTTTGTTGTGGATAGCAATGATCGTGACCGTGTAGTTGAGGCTAGAGAT
Gma.4171.1.S1_at	CD401267	At5g17060	3e-98	Intracellular Traffic			ATACAAGGCACTTGTGCTCTTCGGGGAGATGGTCTTTATGAGGGTTTGGACTGGTTGTCCACAACTTTGAAGGAGAGACGAGCTGCTGGATACTCTTCAATAGGACTAGGAACTTCATCCTTCTAATTTTCAAGAGGTATTTTGGCAATGGACGAATGTGTTGAGTGTGTGGCCAGTTCTAAGTTGATGTGATCGATAATCAAATATTTTTTGGGTTACATCTGAAGCTCTCATTAGTAGAAAGTTGCTTCGCCTTTCAGGGTGCTTTAGATATGTATGCGACTTTGCTCCAATTATACAAGTTTGTGCATGACGAATGATTAACTAAATTCTTTTGCGATATTGATATCCCTTATTAAGTGCACTTGTACTGGATAGAAGTTAACGGATACTGGATCA…
Gma.7813.1.S1_at	BU550409	At5g67560	1e-29	Intracellular Traffic			AAAGAAGCTTTGACCGACCAAATGGATCTGAAGTCAATTACTGACAGAGAAGTTTGCTGCTTCATGATCTCGTGCANAAACTCGACTAACATTGACTCTGTTATCGATTGNCTTGTAAAGCACTCCAAATCAAAGAGCTAAGAGGCTCCCTTATGTTTTGTACTCTAATGTAATTTCAGTGACATATATCTGGAAGTTGCTGGAGGCATCTGCATGGCTAACTTGGTTGCAGATTACTTTATTCCTGCCCTTTTCTCATTTGCTTCTTAATGTAATATCATGTCCAATGACGTGTATCAAACAAGATGAAATTCATGTCAAGGGTTGTTTTGTGCGTGAATCATATTGTCATTGTCAGTTTAGTTGCATTTTTAGAATACTTGCAGAACTGCAGTTGTG…
Gma.10871.1.S1_at	CD403269	At5g20720	6e-98	Intracellular Traffic			CACAAGTTGTGTATTCGAAGTATGCAGGTACTGAGGTGGANTTCNATGGTACAAAGCATCTTATTGTGAAGGATGATGACATTGTTGGTATCCTNGAAACTGATGACATCAAGGATCTTAAACCCTTGAATGATAGAGTCCTCATAAAGGTTGCTGAAGCTGAGGAAAAAACCTCTGGCGGTTTGTTGCTTACAGAGGCAACCAAGGACAAACCTTCGATTGGAACAGTGATAGCNGTTGGGCCGGGGCATCTGGACGAGGAAGGCAACAGAAAACCNTTGTCCGTGACTCCNGGGAACACAGTTTTGTACTCCAAATATGCTGGAAATGACTTCAAGGGCAAAGATGGTTCTGACTATATTACCTTGAGAGTCTCAGATGTCATGGCTGTTCTCTCCTA
Gma.2369.1.S1_at	CA802514	At5g61790	1e-88	Intracellular Traffic			ATTCCCTTCCTGAGTGCCTACAAGCTTAAAATATACGATGTCATTGAGAAGGGTCAAGAGCAACCAAATCTCACTGTTGGAATTGTTGTAGCCGTTGTGGTTGTCATCGTGTCAGTTTTCTTGAGGCTCATATTTGGTGGGAAGAAGAAGCCCACAAGGGTGGAGAAGACAAACGTAGAACCAGCAGAAACTGCAACTAGCCAAGGCAGTGGTGAGAATGAGGAAAACAAAGAGAAGGAGGAATCATCTGCCCCTGCACGTCGGAGGCCAACAAGGAGAGATAATTGAAGAAATGATTGAAACTTAACAGACAGGGGCGGCCATTAAAGAACACTACCGCACATAAATTTTGAGCTTAGTTTGGGCATTAGGCCAATTCTGTAGTAGCAGGTTGTTGTA…
GmaAffx.1112.1.S1_at	CD396251	At5g61790	2e-06	Intracellular Traffic			AGAAGACAAACCCAGAACCCGCAGAAACTGCGAGTAGCCAAGGCAGTGGTGAGAATGAAGAAAACAAAGAGAAGGAGGAATCATCTGCCCCTGCACGTCGGAAGCCAACAAGGAGAGACAATTGAAATGATTGAAACTTGACACAGACAGGGGCGGCCATTAAAGAACACTACCGCACATAAATTTTGAGCTTAGTTTGGGCATTAGGCCAAATACCGTAGTAGGTAGCACGTTCTTGTCATTTGTCTCCTGCACCTTTCGAAAGATGATATTGCATAAGGGAGTGTAGATCAGATATTTTGTGTCGTGCTGATGATCACTTTGGAGACTTGAGCATTTTAAGCTAATTGAGGCTGTACATCAC
GmaAffx.82790.1.S1_at	BM893351	At1g65320	2e-31	Intracellular Traffic			TTCATTGGCTGCAGTATTGGCTCAGATGCTATCTCACAGGGCAACTCATGTCTGGGTGACCGAGGACGAGAACGATGAAGTTTTGGTCGGTGTGGTCGGATATGCTGATATTTTAGCTGCTGTAACCAAACCACCTACAACCTTCATTCCTGCTAATAGATCTACAGAGGGGTTTGGAAATGAAATNCNNNNNNNNANNTTTTGCTTCAACTTTTTCAATTAGTACTCTTAGCAGTTTGTCTCTTTGGTGCTCAATCATCTCACAGTACATTAAGATGAAAAACGAGTTTGGATTGTTGGTTTGTACA
Gma.7277.1.S1_at	CD407589	At4g34450	1e-127	Intracellular Traffic			TTGGTCCTAGAGAGAGCTTGGCTGAAGCTGTAAACACTGTTATCAACCTACTTGGCTTGGAGCCTTGTGAGGGCACAGAGGAGGTTCCACCCAATTCAAGATCACACACATGCTTATTGTCAGGTGTATTCATAGGGAATGTGAAGGTGCTTGTACGGNTGTCTTTTGGACTTGATGGTCCAAAGGATGTTGCAATGAAACTGTCTGTCAGATCAGAGGATGAAACAGTCAGCGATGCCATTCATGAGATTGTGGCAAGCGGCTAGTCCATTGAGTCAAGAAATGTTGACTCAAATCAGCCCCTTTTTTGGTTAATGAGATTGGAGTTTAGCAGGCATATAGATATTGACGTTTGTAAAGAATTTCAAAATTGTAATTGTTTGTCCTTCACTCACTGCA…
Gma.1035.1.S1_s_at	CD418467	At1g30630	1e-132	Intracellular Traffic			CCAATCTAGTTGTATGCTGTCTTCATCTCGGCAAACCATCTAACAAATCATTCAGCCAGCTGAAACTTTCTCACCCAGAGCATGTATTGGTCAAACGGGTATCATCAGCTGAAGAAAGTTTTGATAGAGCGCTACAATCATTTTCCTCATGAGTGTCGATGATTGAATTTCTTTCAAGAGTTGAATGGTGTGAGGTCTTCCCGTGCAATTTTTACACCTTATCGTGGCTATTGTATTGGTTGCGTATCTTAGAACATAATCAACTGGGTAATGTGTCATAG
GmaAffx.92005.1.S1_s_at	CF807730	At1g30630	1e-108	Intracellular Traffic			GATCCATGACGACGCTCCCACACCTCTCCAAGCCGTCAAACTCCTCGCTCTCTATTTCTCCTCCCCCGACACCAAGGATTCCGCCATCGCGAGTCTCAAGGAGTGGCTTGCCGATCCCGCCATTGCAAACAACGCCACGCTGAGGCTCGTCGCCGGTCTCGTCTTCCTCCATGAAAATGATTTCAACGAAGCCCTC
Gma.2138.1.S1_at	AB040543.1	At3g09800	7e-65	Intracellular Traffic			ATATGGCATTTCACAATGACGGAGGAAACTTGTCTTTAGGTTTTTCCTATAAACGTTTATAAGAAAGAACCTCATTGCATTCTCGAGAAGTCGAACCTGGATGTTGATGTTACTTGCGTAGTGAAAGTTAATATTGACATGCTAATACAGGCTATTCTAGCAGTACTTTTCTTCTGGCGATTTGTTATTTTAGTTACCTATTAAATTTCAGGATGGTGGCATATTCCGTATGTTCCAAAAATTTCA
Gma.3839.1.S1_a_at	CD391787	At1g60780	1e-156	Intracellular Traffic			TATCAGGCTCTTCCATGGGTGAGATACATAAC
Gma.10225.1.A1_at	AW704572	At4g24550	7e-20	Intracellular Traffic			CATAATGTTTCACGGCTTCAGGTAAAGTATTTGCAGATAGCAAAGAAATCTGCAACTCATGAGCCATACCGGTGGGTTAGATATGTTACACAGGCAAATTCCTACGTCGCTCGTATATGATGCTGTTAAGAAAACTGTGGCCTCCCCCTCCCCCCTTTGTTTTTCATTTTTATTTTCCTCCCACAATTGCTCTTTACAGTTTACAGACATGCTTTGATTTTTTACTTTATTCTTTATTTGTAAATTACATTCTAAGTCGAGTATAGATGCCGTTTGTAGTTTGCCTTATTTATCATTC
Gma.8717.1.A1_s_at	BU761149	At5g46630	1e-130	Intracellular Traffic			TCTGGTTTACGTGTCCGTTTCCTCAAGGTGTGGGAGAAGAGTGGGTACAATACCGTTGAGTGGGTTCGTTACATTACAAAAGCNGGATCCTACGAGATTAGGTGCTAGACANANTTNGTANNTTNCTGGNTGGAGANTGAAGCNAAAATCCCNAATAAGNCGCAGTNCAGGCTAGTNATCCNAGNTTTCGTATTGTATTAAACATGTAATGANNNAAGGTTCAGGAGTTACTCAATGTGCTGTCAGTATGATT
Gma.1966.1.S1_a_at	BE657930	At5g05010	1e-118	Intracellular Traffic			GAACCATCAGCATTCTTCCCCATTTCAGTTCGTTTTATAGCAACTGAAACATTTAGTGACCTGAAGGTCACCAATGTCATACCGCTAAATGGTGGTAATCCTCCCAAGTATTCTCAGAGAACACAGTTGATCACAGAAAACTACCAAATTGTGTGATCGATTTTCCTCTTGACACTGAGCTTTTATGACAGTTTTGCNTTTACATTNGTGATTCTTTTATCAAAGGGCTTTTCTTTGCCATGTTGCA
Gma.2422.1.S1_at	AW309656	At5g05010	1e-125	Intracellular Traffic			CAGATTCATCAGTGTTCTTTCCCATTTCAGTCCGCTTTATGGCAACTGATACTTTTAGTGACCTGAAGGTTACCAACATCATACCATTAAAGGGTGGCAATCCTCCCAAATTTGCTCAGAGAACACAGCTGATAACGGATAGCTACCAAGTTGTGTGATTGACTTTCTTGAATTTGAGCTCCTATAACAGTTTTGCTTTTACAGTCGTAGTTCTTTTNATCAATAGGCCATGCAAAGTTGTACTTGCCTCTATTCATGAATTTGTACTTAGTTTTACTTCGCAAGACATGGCGCAAAGTATGATTTACATAATTAATGCTAAAGCGTGTCTGTTTTACTCTANNNNANNNATCTTTTATGGGGAAGGATGCATTGCCTATCTTCCCTTTTCTGCGTTAT…
GmaAffx.1729.1.A1_at	BI426505	At2g17380	2e-14	Intracellular Traffic			GGAAGAAGTCAGTTCATTAAGTAATATAATTGCACAAGCNNNNNANNNNNNNNAACAAATGNTNCANTTNCCTGCTCCTCATATAGTATGTCGAATTGTCAATGTCCGATTTTACTGTTACTAAGTTGTCTTTCTTGATGTTGTCTTTCTCACATATCATGTTTGTGTATGCCTGAACTGTATTACTTGTTGTGGTGAGATTGAGCCCCCAGGGTTACTTTTACTTTGCATGTTCTGAGATTGAAATTGAATAGATTCCTTGGTAATATCCTTTTTCTTTTTCCCATTTTGTAATATATTGTTTGCTATAAAGAGTTTGTAAGAATGATTAGAAATTATTTTAATAGGTAGAGTATTATTTTCATGGATAANAAANNANNNNAAANAANNNCTNNNNNN…
Gma.5822.1.S1_at	U42608.1	At3g11130	0	Intracellular Traffic			TCCTGCAGTTTATCCGTGAGTACACTGGCAAAGTTGATGAACTGGTGAAGGATAAAATAGAAGCGCAGAACCAAGTGAAAGCTAAAGAGCAAGAAGAGAAGGAAGTAATTGCTCAACAGAATATGTATGCTCAGTTGTTGCCTCTTGCTTTGCCTGCACCGCCAATGCCTGGAATGGGAGGAGGCTTTGCCCCTCCCCCTCCAATGGGTGGATTGGGGATGCCTCCAATGCCACCTTTTGGTATGCCACCCATGGGTAGTTACTGACAGATAAGTTCGGCAATGAACTCAAGTGTATACCGAGAGCAGTGTAGCAACTTGGGAGTTTTCAAACATTTTCTTTTGGTGTTTTAATGCAGTATTCTTTCCTTGCTTCTAATGGAAGAGGAGGTTCAGGTCA…
Gma.1321.1.S1_at	AF198627.1	At3g56240	2e-30	Intracellular Traffic	Ionic Homeostasis		TGAAGTTCTGCAAGCCGTTTCCAAATCTGGGAAGAAGACTGCATTCTGGGTGGATGAAGCACCACAATCTAAAAACAAGCCTTTAGAAAGTGCACCTGTTGCCTCAGAAAACAAGCCTTCAGAAGCTGCAACTGTTGCCTCAGCTGAGCCTGAAAACAAGCCTTCAGAAGCTGCAATTGTTGATTCAGCTGAGCCTGAAAACAAGCCTTCAGATACTGTTGTTGAAACTGTTGCTTAAGGCATTTGTGGTTCTATTTTTCTATGTGGAAGTAGGTCTGTTTCATATAGTATTTCATGTGCTTTGTGCATGTCAGCTATTATATTTGGTGTGTTGTTACTGGTATCTAAGCTACAATAACTTGTGGCCTATTTTTCACATGAGATACATTTCATGGGTGC…
GmaAffx.59378.1.S1_at	BI425133	At1g08800	0.003	Intracellular Traffic			GATCAGCTACAACAATTACGCCAGATTGGGATAAGAGAATTAGATCAACCTGTTGCTTGAGGCTGTATATAAGATTCATACACTTATGATTGGATCCGCAACCAGGAGGAAGTTACCTTGTGCACTAGTGAACCAGGTTACCAAGGCTGGTTGCAACTGTACAGTAACATAGCTTGCTTTCATCCAGGATATAAGAAAATAGGATTTTAAATAATTTTTTTTTCTTTTTCTCCCCCTGCCTTTTTGTTCGGGGTTTCATTGAACGTTTTGCTGCATTGAGTTGACAAGGTTTTCATCTGCCCATTCAAATTTTCATTTTACAATAAAATTTTCCCTTTGCCGTTTTGCATTGTAA
Gma.5383.1.S1_a_at	CD392823	At3g13772	1e-109	Intracellular Traffic			GATCCTATTAATCACCTGTGCCGAGATTACCATTGTGCTTTGCTACTTCCAATTGTGCAGTGAGGATTACAATTGGTGGTGGAGATCTTATCTCACTGCTGGGTCCTCTGCGTTGTACCTCTTCCTCTACTCAATTTTCTACTTCTTTACCAAGTTGGAGATTTCAAAGCTGGTATCGGGCATCCTTTACTTCGGGTACATGATAATTGTTTCATATGCCTTCTTTGTGTTGACGGGAACTATTGGCTTCTATGCTTGCTTCTGGTTTGTTCGCAAGATCTACTCGTCGGTGAAGATTGACTGATTTCAGGCA
Gma.6833.1.S1_at	BU545297	At5g11710	1e-28	Intracellular Traffic			GATTGATCTCAATATAACTGCTCCTAAAAAAGTATCCCTTGNGGANGTTGGAATTGTGGGTGGATTGAGTGATGGATCCGATGAAAGGGAGAAAGGCCCTCCACCTTCATTTTACATGGGGAGAGCTATGGGTTCAGGATCTGGTCTTGGAATGGGTAGGTCTGGATTCACTCCTTCACAGCCANNAGCTGGAGACGACTTTTTCTCAANCCTTNGNAACCAACAANATCAATTTGGTGGGTTCCAAAAGTAAAATTCTCAGATTTTATACTCTTCCCATCACATTTTCACNCATTCTTTNTGTNNCGGCATTACCAAGCTTGNNNAAGCTTTTTGGCATGGCTTTTTGTTCATATATATTTCTCCCAATATTGTGATTATATTATTTTAAATTTTAAG…
Gma.6196.1.S1_at	BE058075	At4g33650	1e-22	Intracellular Traffic			AATGGAGGGCCATACACGTCAGGTTNNNATCCAATGGCTGNTGAATGANCTNGCTGATTGTGCTTGTTAGTCCAANAAATTTGACTCAGCGTTTAATTATTTGTTTATGCTTATGCAATTTTTGAGGTTTGCAACTCCTCCTGGAGCTGGACTGCATTCAGTTACTATTTTTCCCATTAAAATGGTCCTGAGTGTTGGTGGGTGCTTTCTTTATCTAAGTTCCCTTTTGTTCGCATATAGCGTTATTTACCAAGGCTCCGGAAAGAATAATAGGAGCAGATGATTTTTCAGTTGAGAGAATTTTTTCACTGTATTCATGTATATTACTATTACCATTTTTGTTGGTGGCTAGTCAGCTATTGTTCATAGCAATTTTCTAGATTGATGCATTTTTTCATT…
Gma.2787.1.S1_s_at	BG510112	At1g10290	1e-112	Intracellular Traffic			ACACGCCAATTGAGTATTCATGACACCCGAGCAGCAGCTGCCTCTGGCTGGTCAAATGGTAGTGCAGAGAGTAGCCCAAGAAGCAGCAGCGGACCTGGTGATGACTGGAGATCTGCCTTTGATGCAGCTGCCAATGGCCCTGTTAGTCGAAGTGGTTCATCAAGATCGGGATCCAATGGTCACAGTCGACATTCTAG
Gma.7182.1.S1_at	CD404103	At1g14830	3e-34	Intracellular Traffic			ATGTTAATTCCTATATCGGTATGGTTTGCGATACACTTAAGAATACTATACCAAAGGCCGTGGTTCATTGTCAAGTTAGAGAGGCTAAGAGATCATTGCTAAACCACTTTTATGTTCATGTTGGGANNANGNNNNNGGAGAAATTGGGTGCTATGTTGGACGAAGACCCNGCCCTTATGGANAGGAGAAATCAAATAGCTAAAAGGCTTGAATTATACAAGCAAGCTAGGGATGATATTGACTCCGTGGCTTGGAAATAATGAGATCCCAGGGTTTGCAACAGATGTTACGAGCAAGATTTGTTATAGAATTGATCATTCTTACTATTTTTTAATCAAACACGAACAGAAAAGTCTACGGTTATGGCAAGTTGAATTCGCACTTGCGAATAATTCTTTT…
GmaAffx.32618.1.S1_s_at	BM271526	At3g07680	2e-24	Intracellular Traffic			CAGACTGACCGCCAAGCAATAGTGAACGATGCAATGAGCAGAAGAGCAGTACACAAGGCAATTTTTGAATCAGCAGCACTGATTGGGGCTAGTGCGCTGCAAGTCTACCTTCTGCAGCGATTGTTTGAACGAAAGT
GmaAffx.91121.1.S1_at	CF806846	At3g07680	6e-78	Intracellular Traffic			TCGTTGTTATTAAGGCTGATTCTCCCTGGCATTACGGCGACGAAGGTGTCGATCTCGTGGTAAAGGGACCTTCTGGCGAGCAAATTCAAGATTTTCGGGACAAGACCAGTGAGAAGTTTGACTTTGTGGCTCACAAATCCGGGGTCCATAAATTCTGCTTCACCAACAAGTCTCCTTATCATGAAACTGTCGATTTTGATGTACATGTTGGTCACTTCTCTTACTTTGAGCAACATGCAAAAGATGAGCATTTCACCCCCTTGCTGGAGCAGATTGGGAAGTTGGAGGAAGCTCTATATAACATTCAGTTTGAACAGCATTGGTTAGAGGCTCAGACTGACCGCCAAGCAATAGTGAACGATGCAATGAGCAGAAGAGCAGTACACAAGGCAATTTTTG…
GmaAffx.93603.1.S1_s_at	CF809328	At5g01600	4e-49	Intracellular Traffic	Ionic Homeostasis		CCCATTTGGTTATTTCGCCCTAATGGCTCTTGCTCCATCCAAAGTTTCCACCTTTTCTGGTTTTTCTCCCAAACCCAGTGTTGGGGGTGCTCAGAAAAACCCAACTTGCTCTGTTTCTCTGAGCTTTTTGAATGAGAAACTTGGAAGCAGAAACCTTAGGGTTTGTGCCTCAACGGTGCCTCTCACTGGGGTGATTTTTGAACCGTTTGAGGAGGTTAAGAAGAGCGAGCTTGCTGTTCCAACTGCTCCCCAAGTCTCGTTGGCTCGTCAGAACTACGCTGATGAGTGTGAATCTGCGATTAACGAGCAGATAAATGTGGAATACAATGCTTCCTACGTGTACCACTCCTTGTTTGCATACTTTGACAGGGACAACGTGGCTCTCAAGGGATTTGCCAA…
Gma.7064.1.S1_a_at	BQ613120	At3g62560	4e-54	Intracellular Traffic			GCTCAGGTGGATGCTGTAGTGTACCTGGTTGATGCATTTGACAAGGAAAGGTTTTCAGTGGCTCTCTCAGTACATTAAATAGAGAACAAGTGTTTGCTCTTTATTATCCTCATGCTAATGTAGTCTCCACATTAGCGTATCTCTGCTCATGTAAATTGGATATACTTTAATGGTGGTTTTACTTTTTCTTTGTTATGAATGAGACATACTAGTTTCTAT
Gma.7064.1.S1_at	BQ613120	At3g62560	4e-54	Intracellular Traffic			GTTGTTTATTTTTCACACCACTTGTGAAACTTCTCAAGAAAAAGAAAAAGGATGTTTCTTGTTGATTGGTTCTATGGAATTTTGGCGACCCTTGGCCTGTGGCAAAAGGAGGCGAAGATTTTGTTCCTAGGGTTAGATAATTCTGGGAAGACCACTTTGCTTCACATGCTCAAAGACGAGAGACTTGTTCAGCATCAACCTACTCAATATCCCACTTCGGAGGAGTTGAGTATTGGGAAGATAAAGTTTAAGGCTTTCGACTTGGGTGGTCACCAGATTGCTCGTAGGGTCTGGAAGGACTATTACGCTCAGGTGG
GmaAffx.32631.1.S1_at	BE659866	At1g05785	2e-30	Intracellular Traffic			TTTCGCATTTCTTGGCATAATTCTTTTCTTTGACCGTGGTTTGCTTGCTCTGGGAAATATTTTTTCCTTGGCAGGGGTAGCCATTTTGCTTGGTTGGCGTTCCACGTGGGCACTCTTCACANATAGAGCAAACTTTAAGGGTTCTGCATCATTTCTNCTAGGTCTCTTTTTCATTTGTGTGAGGTGGCCAATTGTTGGTATAATACTTGAAATATACAGTTGTGTTTTTCTCTTCAGTGGATTNTGGTCATCTATCAANNNNTNNNNNNNNNATATCCCTGTTGTTGGATGGATTATACAGTTTATCTCTCCTCCTTGATTGTCACAGAAGGGATTTAACNGATNGCCTNNTAGTATATGGCTAATCATGGGTTTCGATTGTNTTGGTAATTTTTCCAA…
GmaAffx.87115.1.S1_at	BI970509	At3g60860	3e-25	Intracellular Traffic			TTGTTGTGACCACTCTTCAAGCTATTTGTAATTTGGGAGAGATATCTTTCGAGAAGAACCTGGCTCATTTTTTCCCTCTCCTCTCAAGCTTGATAAGTTGCGAACATGGATCAGCTGAGGTTCAGGTAGCTCTCAGTGATATGCTTAGTTTATCAGTTGGTCCTCTTTTGCTACGGTCATGCTGATTGATTACGTTAAGATCGACAATGAATTTTGAGATATAGGATATTTTTCCTCTAAATCTCTTTTGTTCATATTTTCCTCCTTTCCTTTGCCTCGGGTTACTTGCAAAAGTATAGTTCGATAGTGTTTGAATAGTTGGCAGTGATTTTGTGTTTAGAATACCTTCCCGGTCCTTCTATATTTTAGAAGCCTAAGATTACCAATCCGAATTGATCT…
Gma.11202.1.S1_s_at	AW309575	At1g27970	1e-57	Intracellular Traffic			CAACAGGAACGGCTTAGCGAATCTCTACCAGGAGGGTTCCATGCTCACTTTCGAAGGGCAGAAGATCCAAGGCGCTTCCAACATCGTTGCCAAGCTCACCTCCCTCCCTTTTCAGCAGTGCCACCACTCAATCTCCACCGTCGACTGCCAGCCCTCCGGCGTCAACGCCGGCATGCTCGTCTTCGTCAGCGGAAACCTTCAGCTCGCCGGCGAACAGCACACTCTCAAGTTCAGCCAGATGTTCCATTTGATACCAACACCTCAGGGAAGCTATTATGTGTTGAATGACATATTCCGTTTAAACTATGCATGAAGATGTCATATGACCGGAAAGGCCAT
Gma.2443.1.S1_at	BQ081268	At1g27970	7e-55	Intracellular Traffic			CTCGCCAATCTCTACCAGGAAGGTTCCATGCTCTCTTTCGAGGGTCAGAAGATCCAGGGCTCCCACAACATCGTCGCCAAACTCACCTCCCTTCCCTTCCAACAGTGCCAGCACTCCATCACCACCGTCGATTCTCAGCCCTCAGGCGTCAACGCCGCCATGCTCGTCTTCGTCAGCGGCAACCTCCAGCTCGCCGGCGAACAACACGCCCTCAAGTTCAGCCAAATGTTCCATTTGATACCAACACCACAGGGAAGCTATTATGTGTTGAATGACATATTCCGGTTGAACTATGCGTGAAAGATAGACCTCTGAGTATGTTGACATTTGCCTACAGCTGTTTTGCTTCAGACATTTGCATTTGAGAATTAACGAGTTCATTTTGGTTCGTGTTGAACG…
Gma.4528.1.S1_s_at	CA802816	At5g19820	2e-76	Intracellular Traffic			CCGCAGCAACAACTTGCATTGCAATCTATCCTTTCTACATAGTTGTCATTGCTTTGCTGCATATCCATCATTTCTTCATAGCATCTGGCTTGGCAGTTGGTGTCTTGCTCTTTTTGGGAACAAGCTTTTTCCAGTTTGGTGGTCTCTATATTTGTACCCATTCTTTTTNCCATANGNTGGTTTCCATCATTCATTCTTGCATGGTGTTCTATANNNNNNNNNNNTCAGTTTTGAGANTGCAGAGTCAATTGTGATTGGAAAGGGAACTTTCTNTAGAATGTGTATATTATGAGTGTTAATAGTGCGATTGAGTCCAAAAGAGGAGGTTAGGGAATTGTGGCGTGGGAGCTTCTCGTTNTATTCCTCNATTGTTTTTTCTTACCATATTGCGTGAG
Gma.6723.1.A1_at	BU544521	At5g06140	1e-10	Intracellular Traffic			GATGCGTGGAGAAGTTTGCTTCCCAAACTGGAAGCATGTTCCTCCTCGTAGAGAAAGAATTAATCAATGAGTTCTGCAGAGCATAGATAAATTACTCTTTCATGGCTGATTACAGGGGCTACTAGGGTATGGCAAACGCAGATCGCAGCTCGTGTTTTGTAAAAGAGCTTTCGGATTATGTTGTAAAAGATGTGTTTTTTTCTGTCTGGCCGATTTTGTACAAATTTTAAACAAAGTAAAAGGTTACCTATCCGCACTTTTATTTTTTATTTTGCTGCTGTTGNTGCGATATCTCTTGTCTTCCTCTGTTGTATATAGTCACAACGGAATTACATGACAATATGGAAGGCTTTTCTTTAGTCTTTTAGATGAGTCAGCA
Gma.7447.1.S1_s_at	BI967765	At1g01620	1e-138	Intracellular Traffic			CAAGACAAGGGCTTAGGCTCTTGTTTTTGTATGTGCTTGCTTGTATTAGTTGTTATTTATGTNTCTGGNGTCTTCTTCATTTNGAAANTTCATGTNAATCTTTTTGNNTTTNNNNTAATCCATTGTATGGATGTAAATTATGAC
Gma.1659.1.S1_at	AW132168	At3g07100	1e-54	Intracellular Traffic			AAACCTTGTTGAGGACCAGATGGGTGGTAACAGTGGGTATGCTGAATGGATGCTGCAGATATCNCGACAAGTGCAGCAATCATAATATATAGCTTCCCTGGCTAAATAAGCAAGTCAGNTCTGCTATTTGTCTCACAAGTGACGACCATTTCTTTCTGCATTGGAGNTATATTAAATCTGTCCTTTGGGGNTGCTTGGAGAAGCATTCTTGACCTGGCTAATTGATCGTGACNTGTGAGAAGCATGCTTTTGAGAGATTGTTGATTCATCCTGGGAT
Gma.1659.2.S1_a_at	AW704429	At3g07100	1e-100	Intracellular Traffic			GACTGTTGAAACTTCTCTATCCTAGCTTAATTCGACTTGATGAATATCTTCTGAAGGCATCTGTACAGGCTNATGACTTAAAAAGTGTTGAGAGAAGGTTACCTTTGACTGGGGAGAGCTTAGACTCTAGAGGNCTTTATATTTATGATGATGGNNTCCGGTTCATTATATGGTTTGGTNGGGTGATTTCACCTGATATAGCNAAGAATTTACTTGGGGCAGACTTTGCNGCAGAANTATCAAAGACTACTCTCAGTGAGCATGATAATGAAATGTCAAGGAGGCTGGTGAAGGTACTTGAGAAGTTGAGANATACAGATCGTGCATATTACCAGTTGTGCCACCTTGTGAGGCAA
Gma.1324.1.S1_at	BE658235	At2g17800	1e-96	Intracellular Traffic			TGGCACAAAGCTTGACCTTCGGGATGATAAGCAGTTCTGCATNGACCATCCTGGTGCCGTACCTATTACCACAGCTCANGGAGAAGAGCTTAGGAAGCTGATTAATGCNCCAGCTTACATTGAATGCAGTTCAAAAACACAGGAGAACGTGAAGGCAGTCTTTGATGCAGCCATAAGAGTTGTCCTTCAACCACCTAAGCAGAAGAAAAAGAAGGGTAAAGCACAAAAGGCNTGNTCGATATTGTGATTCACTAGGTGTTAACATTTGACTGCCCTTTGTTCTNCCTGTATTACCCTCCCCTTCTTTNTTTTTATCATTTCNTTGNTATTGAAGAAGTTGNAGTNNTNTGTGGGTGTTCCTCAGACAAATACTCTAGATCTCCTTGAAGCAT
GmaAffx.91170.1.S1_s_at	CF806895	At5g59840	6e-75	Intracellular Traffic			GAACTATTACCACAGCTTATTACCGTGGAGCCATGGGTATCTTGCTGGTTTATGATGTTACTGATGAAGCATCTTTCAATAATATTAGGAATTGGATCCGCAATATTGAACAACATGCTTCTGACAATGTAAAC
Gma.1450.1.S1_at	AF532625.1	At1g16920	2e-99	Intracellular Traffic			GTGTATGATGTCACTCGCCATGCAACATTTGAAAATGTTGACAGATGGCTGAAAGAATTGCGGAACCACACAGANGCCAACATTGTTGTGATGCTNGTNGGNAANAAATCAGACCTTCGTCACCTNGTAGCNGTGTCAACTGAAGATGGGAAGTCCTATGCTGAGAANGAATCACTTTACTTCATGGAAACCTCAGCTCTGGAGGCTACTAATGTAGAGAATGCNTTTGCNGAAGTTCTGACTCAAATCTANCNCATTGTTAGCAAGAAAGCAGTAGAGGNGGCTGAAAATGGAACNNCATCTGTGCCTGCCAAAGGAGAGAAAATTGATCTGAAAAATGATGTNTCTGCTTTGAAGAGAGTTGGTTGCTGCTCAAGCTAANATTGGAAAACATAGTTC…
Gma.3568.1.S1_x_at	BI941735	At2g44610	1e-102	Intracellular Traffic			AACTAGTGCTAAGGCTGGGTTTAATATAAAGGCCCTATTTCGAAAAATTGCTGCAGCACTACCTGGAATGGAAACACTATCTTCTGCAAAACAAGAAGACATGGTTGATGTAAACTTAAAGTCTACAAATGGCAGTGCTCAGTCTCAACCTCAGTCAAGTGGATGTGCTTGTTAAGTATACTTTATCATGTGCGGTCCACCTTTTTGTGTCATGCTTTTTGTTTTATGCGGGTTTTTCTATAGTCTTCTACAGCATTATATGAAAAGATGAAAGAATATATAAGCGGATCAGGGTAGGGGTTGATAAAAGTTCTGTCTAGACAATTTCTGTTGTTAGTTGGTTTTTTGCCTATAATGTGTACTAATGAATTTTTTTTTTTTNNNGAACGGCATAATGTA…
Gma.3568.2.S1_at	BM308236	At2g44610	9e-71	Intracellular Traffic			GTGTCATTCCTTTTGTTTTATGCAGATTTTTCTAGTCTTCTACATCATTATATGAAAAGATGAAAGAATATATAAGCGATCGGGGTAGGGGTTGATACAAGTTGTGTCTAGAAAATTTCTGTTGTTAGTTGGTTTTGCCCGTGATACTGTGTACTAAAGTAGTAAAGCTGCCCAACCAAAGATTGAATTATGTTCATTGTAACCCTGTA
Gma.4268.2.S1_a_at	AW569523	At3g18820	4e-62	Intracellular Traffic			GAAGAACTCTCTTGAAGGTCATCATTCTCGGTGACAGTGGGGTGGGGAAGACATCTTTGATGAACCAATATGTGAATAAGAAGTTTAGTAATCAGTACAAGGCAACCATTGGAGCGGATTTTTTAACCAAAGAAGTGCAATTCGAAGATAGGCTTTTCACCTTACAGATTTGGGATA
GmaAffx.89819.1.S1_s_at	CK606604	At3g18820	2e-64	Intracellular Traffic			TTTCTGATTCAAGCAAGTCCTTCCGATCCAGAGAATTTTCCTTTTGTTGCCATAGGAAACAAAATAGATATTGATGGTGGAAACAGCAGAGTGGTGTCAGAAAAGAAGGCTCGGGCTTGGTGTGCGTCAAAAGGAAATATTCCATATTTTGAGACATCTGCCAAAGAAGGTATTAATGTTGAAGAAGCATTCCAATGCATAGCAAAGAATGCCCTGAAAAGTGGAGAAGAAGAAGAATTATACCTGCCAGACAATTGATGTTGGAAACAGCAGTCAGCCACGGGCAACAGGATGTGAGTGCTGAATGTATAGGTTTTCTCTTCAATACAATAAAGTACATTACTTCAAATTGATTTCACTGTGTTTAGCCATTGCTGTCTATGTGGAGGCATCATTGTA…
Gma.11292.1.S1_s_at	CD409565	At5g47200	1e-100	Intracellular Traffic			GAATGAAATTGACCGTTATGCAAGTGAAAATGTTAACAAGCTTCTAGTTGGAAACAAGTGNGATCTNACGGCAAATAAAGTTGTGTCCTNTGAGACAGCAAAGGCNTTTGCNGATGAAATTGGAATTCCNTTCATGGAAACTAGTGCTAAAAATGCCACCAATGTTGAACAGGCTTTCATGGCCATGGCTGCTGAAATTAAAAACAGAATGGCAAGCCANCCAGTGAACAATGCNAGGCCTCCAACAGTTCAAATTCGAGGACAGCCAGTGAACCAGAAGGCTGGTTGCTGCTCGACTTAGANAGAGACGAAGTATTTGNGGTCTNAGANGTTNNCATGTGTCTCAGTGGCATCTAAAACTAGCTTTTCACATTGCTTTCATATCAAGAT
Gma.4698.1.S1_at	AW309918	At5g60860	3e-92	Intracellular Traffic			TGTTCCACATAGTTTGTTTGAGAGAGATATACAAAAGAGTCTTTTGGTTATGCAGTGTAACAGGATGTTTTTGTGAACTCATTGTTTTATTTTGTTTAGTTCTTTTTTGGTTGGTGATGTATACGATTGATTGGCCTCAGCTGCCCTT
Gma.1887.1.S1_at	CA800104	At1g02130	1e-105	Intracellular Traffic			GGAATTCGCAGATCAAATTGGCATACCTTTCATGGAAACAAGTGCAAAAGATGCTACAAATGTGGAAGATGCTTTCATGGCCATGTCTGCTGCCATCAAGAATAGAATGGCTAGTCAGCCTTCAGCAAACAATGCAAGGCCTCCAACAGTGCAGATCAGAGGGCAACCTGTTGGACAAAAAAGTGGTTGCTGCTCTTCCTAACCAGGTGGTGCTGCTTGGTCTACACTTACCTTTTGCATGTAAGGGGCATATGCTATTTCACTAAATAGTGGACCAGTGTCACGTAATCCAACCTGTGGTTTGGGAATTGGCCTAGATGATCCCATTCTTTACCATATACTTGAATGCTATGATTGTGCTTAGTACTTGTTAATGATAAAACTTTTATATTTCTGCTN…
GmaAffx.87721.1.S1_at	AW156448	At3g07880	1e-45	Intracellular Traffic			TTCACTCCATAGGAATTCTCTCTGAGGATTTTGGTGAAATTGTCACTCCTCTACCTGTGGATGAAAATCGCAATGGCTGTACTCTATTTACTCTCAGGGAGGGGTCTCGCTATCAGCTTAAGCTAAAATTTAGTGTTCTGCACAACATTGTGTCTGGCTTGACATACTCCAACACTGTGTGGAAAGGAGGGCTTCAAGTTGATCAGAGCAAAGGAATGTTGGGTGCTTTTGCTCCTCAAAAGGAGCCATATGTATACGCCTTGAAGGAGGACACCACTCCTTCCGGTGCACTTGCAANNNNNGTTTACTCAGCCAAACTTAAGTTTGAAGATGATGACAGAAGGTGTCACATGGAACTCAAATATTTATTCGAGATAAAAAAGAGAAGCTAGTCCGGTT…
Gma.6586.1.S1_at	CA800380	At3g51670	5e-68	Intracellular Traffic			AAAATGGTACTCTCGGCTGACAACACTGCCTCAAGGAGGAAAAAGGTTGCTGCATATCGCTACGTTGTCCGCAAAAGCAGCACCATTTGAGAATGGCTATTATTAAATAGTTTCTAGGACCTTCTTTATTAATTAATATCTTGCTTGTGATGTTACTTTTTCTACCTTTTTTTGGGTTAAATTTTTAGAGGGTCTTCTTATTTATGCTTCTGAACTCATTAAAAGCCTGTTTCACAGGNTATTAACTAGTAGTAGTTTATTAACTAGTAGTAGTTGTGGTGGTACTAATGTGATGTAAAAAAAGAGAGAAAAAATGGTTGTTGTGGTGGTGGTAGCATATGGCTTGGTATAGAAGGAAAGCAAGTAAGTTTGCTTATATAGCATTACCAAATTACTGTT…
GmaAffx.90036.1.S1_s_at	CF805761	At4g09160	8e-25	Intracellular Traffic			CAAGACCAAGCCCATCCCAGAGTAACTTGAAGCTCAAGAATAAGGATTTTACTGTTACTATTATATGTTCATCATTATTACAACCACAAGAACAAGAACATTGTGCTGTTCAACTTAATTCTTTCATACGGGGTGGGGTTCTTTTCTTCATTTGCTTTATAAAATTATTTTGTTTCAAGTCTGGCGTTGGCCTATTTCATTTAAGCTTACGGTAGTTTGCTATTTGGGT
GmaAffx.92436.1.S1_s_at	CF806104	At4g09160	7e-54	Intracellular Traffic			GAACAGGAATTCACCTCTGCTTACCCTGTTACGGAGTTTACTATTAAACCCGCTACCAAACATTCTGTTGAGTTCCCTGTTTCTGAGAAAAGCCATCTTGTTTGGGAAATCCGAGTGGTGGGTTGGGATGTCAGCTATGGAGCTGAATTTGTGCCCAGCGCTGAGGATGGATACACTGTCATAGTACACAAGAGCAGGAAAATTGCTCCCGC
Gma.18004.1.A1_at	BE190655	At1g32050	5e-16	Intracellular Traffic			GAGACTTTCTCCTCAGGATTTTGCTCCGGGCTTCTATAATGTCTGTCACTTCACAA
Gma.10971.1.S1_at	BI969499	At2g20840	2e-84	Intracellular Traffic			GAATTCCTGGAGCATATGTCTTGTGGTATCGCCCATTATATCGTGCTTTTAGGACTGACAGTGCTTTGAATTTTGGATGGTTTTTCTTGTTTTACCTGCTTCACCTAGGATTCTGTATCTTAGCTGCAGTTGCTCCTCCCATAGTTTTCAAAGGAAAATCCTTGACAGGCATTCTGTCAGCCATAGANNTGGTGGGTGACCATGCAGTGATTGGAATTTTCTACTTTGTTGGATTTGGATTGTTCTGCATTGAAACATTGATCAGTNTCTGGGTTATTCAGCAAGTATATATGTACTTCCGTGGCAGTGGTAAGGCTGCTGAGATGAAGCAGGAGGCTGCAAGAGGAGCANTGAGGGNTGCAANATGATAAATTACNTTGTNAANCCCTGTGTTTGAAT…
Gma.2741.1.S1_at	BQ610111	At5g22360	2e-98	Intracellular Traffic			GAGATACGCACTATCATGGTGGACAATATTGAGAAAATATTGGAGAGAGGTGACCGGATTGAGCTTCTTGTTGATAANACAGCAACAATGCAAGACAGTGCATTTCACTTTAGNAAACAGTCAAAGCGCCTTCGAAGAGCTCTTTGGATGAAAAANTTTAAACTCCTGGCCTTATTGACATGCTTNATTGTTNTTGTTCTTTATTTAATAATCGCTGCTTGTTGTGGAGGCATCTCTCTACCGTCCTGCAGATCCTAANTTGTCACTCNNGCCAGTTTATTTNTTTTCTGAGCTCTGCAACTATCAAGATCGTNCNNGNNNATANGNNCATTGGACGACACTTAAGTATTCCAGATTCAAATTTATGAGCTGAGTGGATAAATTTGATAAAGGATTCAG…
Gma.10915.2.S1_s_at	BI424428	At2g33120	5e-95	Intracellular Traffic			GAGGGAACATATGCAGTACTGTGTTGATCATCCTGAAGAGATAAGCAANCTTGCAAAGGTGAAAGCTCAGGTTTCTGAAGTTAAGGGTGTCATGATGGAGAATATTGAAAAGGTTCTGGACAGGGGTGACAAGATAGAACTTCTGGTGGACAAGACTGAGAACCTTCATAACCAGGCACAAGATTTCAGGACTTCTGGAACCAGAATCCGTCGAAAAATGTGGCTGCAAAACATGAAGATNAAGCTGATTGTATTGGGAATATTGATAGCACTTATCCTGATAATAGTCCTATCTGTGTGTCGTGGGTTCAACTGTGGAAAATAGCACCATTCTCCGAGGCCTTTTATCATGTTATTTCAACCTTGAGATTATCGGAGAAAAGATACTAATGAATGGCA…
Gma.1537.1.S1_at	AI416863	At2g33120	1e-94	Intracellular Traffic			GTTGGACTTGTGATAATCCGTGCGTTTGTGTGTGAACGTTTTATCCATCTTCGAGGCCTTGCTTATGTTCTAATTCTAAACGCTAGCGGTTTTTG
Gma.5536.1.S1_s_at	BU550770	At5g40650	1e-128	Metabolism			CGTGATGAGTACACTAAGGAGAGATTGGATGCCATTAATGATGAATTCAAGCTCTATCGCTGCCACACCATATTGAACTGTGCTCGAGCCTGCCCAAAGGGGTTAAACCCAGGAAAGCAAATCTCACATATCAAGTCACTTCAGCCTAAAGCATAAAATCCTATTGTTAGAGGCATGATGATGTTTGCATTTGATC
GmaAffx.1301.39.S1_at	BI785728	At5g23250	1e-110	Metabolism			AAGGATAGTGGAACTGAGAAGCCTGTTGTTGCTTTTATTGCTGGTTTAACTGCTCCCCCTGGCCGTCGTATGGGTCATGCTGGAGCTATTGTGTCGGGTGGCAAGGGCACTGCACAAGACAAAATTAAAACCCTCAGGGAAGCTGGGGTCATGGTTGTGGAGTCCCCTGCCAAAATTGGAGCTGCCATGCTAGATGTTTTCAAGCAGAGGGGCTTGGTTCAATAGTTTGGGTTCATTTAATTTCATCAAGTCATTTTGGTTTCGATTATTTACAAACTGTTCAAAATTTCTTGATTCCCATTGGTAATGATGGGCTATTTTTTTTTTATTTTTTTTTTAAGTTACGAGAGGGGCATTAAAATAAAATTCAAGATGCTTTATATTTGCAGAAAGTTTGAT…
GmaAffx.90296.1.A1_s_at	CF806021	At5g23250	2e-29	Metabolism			GTTGACTGCCTTCAGAAGTTCCTAACTGATCCTCAAACAGAAGGTATCATTCTTATAGGAGAGATAGGAGGAACTGCCGAAGAGGATGCTGCTGCACTAATTAAGGAGAGTGGAACTGAGAAAGCCTGTTGTTGCTTTTATTGCTGGTTTAACTGCTCCNCCCTGGTCGTCGTATGGGTCATGCTGGAGCTATTGTGTCGGGTGGCAAGGGCACTGCACAAGACAAAATTAAAACCCTCAGGGAAGCTGGGGTCACAGTTGTGGAGTCCCCTGCCAAAATTGGAGCTGCCATGCTAGATGTTTTCAA
Gma.6019.1.S1_at	AI431179	At2g20420	1e-153	Metabolism			GGGTACTCCTGCCAATTTTCTGGATGTAGGTGGCAATGCCTCTGAAAACCAGGTNGTTGAGGCATTTAAAATATTGACTGCTGATGACAAAGTGAAGGCAATTTTGGTTAACATTTTTGGNGGTATAATGAAGTGTGATGTTATAGCAAGTGGAATAGTGAATGCTGCAAAAGAGGTTGCACTGAAAGTACCNGTNGTAGTTCGTCTGGAAGGCACCAATGTTGATCANGGAAAAAGAATNTTGAAGGAAAGTGGTATGGCNTTNATAACGGCTGAAGATTTAGATGATGCNGCTCAGAAAGCAGTGAAAGCTGCTTACAAATGAAGGNTTACTTCTGCTCAAATTTAAAATTCAGTTTAGTTGCAACATTATTTTTGGTGTTAAAACATATTTTCACG…
Gma.3032.1.S1_s_at	CD397802	At4g02280	7e-66	Metabolism	Sucrose Biosynthesis		AATACGTTTCCAAATTAGAGAGGCGTGAAACTCGACGATATCTTGAGATGTTCTATATCCTCAAGTTCCGTGATTTGGCAAATTCTGTTCCGCTTGCAAAGGATGATGCAAGTTAAGTAGCTATATATATATAATTTCACCAAGGCTTGACAGCAGACATAATAAGAGTCATATATGTAAATATAAAAGTCTGCTTCTCGTGTTTTGAAATCTTGTGATGCGACCTAGAGGAGTTTCATGGAAGACTTGTCTATGTTAACTTCGATTATGTATATGCAAGAGATGGCGAGCAATTGTTGTTGAATTTGGATGTCTCTTGTTTTCGTTTGATTAGCAGTTATCAAAGATCTAGACCTGGGAATTACCTGTGAGGATTGTTATCCTTACTGATGGGTA
Gma.2891.1.S1_at	BI971321	At1g23820	1e-140	Metabolism			TGTCGCCAAATATTCAAAGGTTCTGTCAACTATGCATGGACCACAGTTCCTACATATCCTAGTGGGATGATTGGTTTTATGCTTTGCTCAACTGAGGGTCCTCTTGTTGATTTCAAGCATCCAGTGAATCCTTTAAGTGAGAATGATAGTCAACAGTCAAGACCATTGAAATTTTACAATTCTGAGATTCATACAGCGGCTTTCTGTTTGCCATCTTTTGCTAAGAGGAAGATTGGTTCTAAAACAAATTGAAAATATTTTTCCTGGGATTGAAGGAGCAAATGTGGCTGTAGGCATTCATCCTTTCACTGGATTGGTCCATCCATCAATGAACCTTGGAATAAGTTAATATCTTCAAGATGACATTGAAGAGCAACTTTACTTCTATTTCATGAAATG…
Gma.11082.2.A1_s_at	AW310165		0.006	Metabolism			TCATTTTCTCTTCATCTAGATTTTTCATGACAGATATTCCTTTCATTAAAACAGGTTGCGTGAATGGTGGAGTTCTCAAATGTTCNACTGTCTTTTCTAGATCTTTGTGTGTTTCTTGTCACG
Gma.2574.1.S1_a_at	BI469532	At1g10760	0	Metabolism			CCTCAGGACATTGAAGGTGTCATCAAGGATGGNAAAGTCTATGTTGTCCAGACCAGACCACAAATGTAGACCTCCATACCTATGTCTTCTAAGCCANCTACCTCAACTATGTTCTATGTTCATTCCCGTGCAACATGGCGTTTCAAACGTGGCCGTGGCAGCTTCTG
Gma.12207.1.S1_at	U43683.1	At5g13710	1e-167	Metabolism			TGGGCTACCTGACATTCGATTGACTGCTAAGTGTCTTGAAGCTCTGAAGCAAGCAGGTTTTGAGGTAATATGGGAGAAAGATCTAGCAGTGGACTCTCCTCTTCCTTGGTATTTGCCTTTAGACAAAAGTCACTTCTCACTGAGTAGCTTCCGTCTAACTGCTGTCGGGCGACTTTTCACCAAAAACATGGTCAAGGTTCTGGAGTATGTTGGACTGGCTCCAAAGGGTAGTCTAAGGGTTCAAGACTTCCTGGAGAAGGCTGCAGAGGGACTAGTTGAAGGAGGGAAGAGAGAGATTTTCACACCAATGTACTTCTTCCTGGCNCGGAAGCCTGATTNAGACAGGAACTAAGCTGGNTGTACAAATAGGTTGCTGTTTTCATCAGTTACNGTGATTCT…
Gma.4425.1.S1_a_at	BQ297572	At5g01410	1e-139	Metabolism			AGCCATGGTTGGTATCAATTTGACCGATGACAAGGTTGAGAGGTTCGCCAATCGCTCTGAATGAA
Gma.5790.1.S1_x_at	BU549012	At5g23670	0	Metabolism			GATCCATATAATTGTTCTCAGATTCAAGTGAACGTCTCTTGGAGGGAAGTCTGTTCTTATTTTGCCCAGTCATTAGATAANTATGTATAGGTGGAGTTTGGTTATTCATTTGAAACTTACTTTTGCTTGGAATTTTAATCAAGTAAAATTGATGATGATACATTGGGTTGTAATTTTGAATGCGAGCAGTCCNTTGNAAAGTGTATAGGCCACTTTAGCAATGTTTTTTTTNNACAATAGGCTGTCTACTTGAATTGTCATGTGGGCATGGGTTTC
GmaAffx.64615.1.S1_at	BI424359	At3g13110	5e-53	Metabolism			GGGAGACTGCAGTTATTGGGAATAATGTGTCAATTTTGCATAATGTGACATTGGGAGGGACTGGTAAGGCAAGTGGGGATAGACACCCTAAGATTGGTGATGGGGTGTTGATAGGTGCAGGGACTTGTATTTTGGGGAACATTAAGATTGGTGATGGAGCTAAGATTGGTGCTTGTTCTGTTGTGTTGAAGGAAGTGCCACCAAGGACTACTGCTGTTGGGAACCCTGCTAGGTTGGTTGGAGGGAAGGATAACCCTATTAAATTGGATAAGATGCCTAGTTTTACCATGGACCATACTTCATGGTCTGATTATGTTATATAGAAGCTAATTAATTGTCTAACATGTTTTAGAGTTTGTGTTTAGGTGGGAATTGTTTTGGTTGAGGGGGCTTGGTTGT…
Gma.6080.1.S1_at	BQ611386	At2g21045	2e-40	Metabolism			GTAACCATAGATGTCCATGCTGCCAAAGATCTGCTCAATTCATCTGGTTATCGTTATCTGGATGTTAGGTCAGTTGAGGAATTCAACAAAAGCCATGTTGAGAATGCTCATAATGTCCCCTATGTCTTCATCACAGAAGCAGGACGGGTGAAAAATCCAGATTTTGTTGACCAGGTGGCAGCAATATGCAAGANTGAGGATCATTTGATTGTGGCTTGCAATAGTGGAGGAAGATCACTCCGAGCCTCCGTTGATCTGCTTGATTCAGGATTTAAGAATATTGTTAACATGGGGGGAGGCTACTCTGCGTGGGTGNNATGCTGGATTTGCCGGGAACAAGNCAGGAGAAGACCTCAAAACTAGNTGCAAGTTCCGTCCTAANATCGCAAAACCCACTGC…
GmaAffx.1301.92.S1_s_at	BM527505		2.1e-47	Metabolism			GTCAACATCCGCAGGGACCATCGCAATGCTTTGTTTTAATTAAACAGTCGGATTCCCCTTGTCCGTACCAGTTCTGAGTTGACTGTTCGAC
Gma.15478.1.S1_x_at	BI968543	At1g02500	0	Metabolism			TGGTGTGCCCGAGCCTTTGTCTGTCTTTGTTGACACCTATGGCACCGGGAAGATCCATGATAAGGAGATTCTCAACATTGTGAAGGAGAACTTTGATTTCAGGCCCGGTATGATCTCCATCAACCTTGATCTCAAGAGGGGTGGGAATAACAGGTTCTTGAAGACTGCTGCATATGGACACTTCGGCAGAGAGGACCCTGACTTCACATGGGAAGTGGTCAAGCCCCTCAAGTGGGAGAAGGCCTAAGGCCATTCATTCCACTGCAATGTGCTGGGAGTTTTTTAGCGTTGCCCTTATAATGTCTATTATCCATAACTTTCCACGTCCCTTGCTCTGTGTTTTTCTCTCGTCGTCCTCCTCCTATTTTGTTTCTCCTGCCTTTCATTTGTAAT
Gma.1681.1.S1_s_at	BI967482	At1g02500	0	Metabolism			AGTGGTGCCTACATTGTGAGGCAAGCTGCAAAGAGCATTGTTGCAAATGGACTTGCTAGGAGGGCAATTGTGCAAGTTTCCTATGCCATTGGTGTGCCTGAGCCCTTGTCTGTGTTTGTTGACACTTATGGCACTGGGAAGATCCCTGACAAGGAAATCCTCAGCATTGTGAAGGAGAGTTTTGACTTCAGGCCTGGCATGATCTCCATCAACCTTGATCTCAAGAGGGGTGGAAATGGCAGGTTCTTGAAGAC
GmaAffx.9360.1.S1_s_at	BI787001	At1g02500	3e-11	Metabolism			TCATCTCCACACAGCATGATGAGACTGTCACAAATGATGAGA
Gma.15478.2.S1_at	BQ453781	At4g01850	0	Metabolism			AATTCATTCCACTGCTCTATGCTGGAAGTTTTTTGAGCGTTGCCCTTATAATATGTCTAATATCCATAACTTTCCACGTCTCTTACTCTGTGTGTTTCTCTCCTCTTCCTCCTATTTTGTTATTTGTATGTTCTTTTGTAATTTTTTACGTGATCAACTAAAAACATGTACTCTCTGTTTGTATGTATGCCCTACCAATGTGTCTCTTAATATCAATATCAAAAAGAGAGTGTTCAAGTTAANNNNNNNANNNNAANNNNNNNNNNNNTNNAGNNNNNNNNNCNNNNTNGGTNATATGATAAATGCTAGGCAAGTGTGTTGTTGTA
Gma.1681.2.S1_a_at	BI786679	At4g01850	1e-58	Metabolism			AGCACAAAGCGGGTTACTGTCTGTTCAAGCTACCATCTCTCTCTCTCTTTCTTAGTGCCTCCTTGCCAGAAGTTAAAATGGCCCAAGAAACTTTCCTATTCACATCTGAATCAGTGAACGAGGGGCACCCTGACAAGCTCTGTGACCAGATCTCCGATGCTGTGCTCGATGCATGCTTGGAGCAGGACCCTGACAGCAAGGTTGCCTGTGAAACCTGCACCAAGACCAACATGGTGATGGTTTTCGGAGAGATCACAACCAAGGCCAACGTGGACTATGAGAAGATTGTGCGTGACACATGCAGGAACATTGGTTTTGTCTCTGATGATGTTGGTCTTGATGCTGACAACTGCAAGGTCCTCGTCAACATTGAGCAACAGAGTCCTGATATTGCTCAAG…
Gma.406.3.S1_at	BI700440	At4g01850	0	Metabolism			TGAAAGGGTGAAAAAGACCTCCTCAATGTATTTT
GmaAffx.91462.1.S1_s_at	CF806716	At4g01850	1e-113	Metabolism			GCGACCAAATCTCCGATGCTGTCCTCGACGCTTGCCTNGANCAGGACCCAGACAGCAANGTTGCCTGCGAAACATGCACCAANACCAACTTGGTCATGGTCTTCGGAGANATCACNACCAAGGCCAACGTTGACTACGAGAAGATNGTGCGTGACACCTGCAGGAACATCGGCTTCGTCTCAAANGATGTGGGACTNGATGCNGACAACTGCAAGGTCCTNGTNAACATTGAGCAGCAGAGCCCTGATATTGCNCAGGGTGTNCACGGCCACCTTACCAAAANACCNGANGAAATNGGTGCTGGNGACCAGGGTCACATGTTTGGCTATGCCACNGANGANACCCCNGAATTGATGCCATTGAGNCATGTTCTTGCAACNAAACTCGGTGCTCGTCTCA…
GmaAffx.91462.1.S1_x_at	CF806716	At4g01850	1e-113	Metabolism			GACTGTTGAGTATTACAATGACAACGGTGCCATGGTTCCAGTTCGTGTCCACACTGTGCTTATCTCCACCCAACATGATGAGACTGTGACCAACGACGAAATTGCAGCTGAC
GmaAffx.89241.1.S1_s_at	CK605667	At3g17390	6e-71	Metabolism			AGTGGTGCTTACATTGTGAGACAGGCTGCTAAGAGCATTGTGGCAAGTG
Gma.16444.1.S1_a_at	AW101824	At1g20330	1e-179	Metabolism			GGCGGAACCATATTGTGGTCACTGTTCTCGCCGCTTTGGGAATCGCGCCTAAGGGGACCGTCGATGTTCATGAGATGCTCTTCAAGACCGCTGACTATTTGACCAGAGGG
GmaAffx.25648.1.S1_at	AW568402	At1g22340	2e-57	Metabolism			TCTTTGCGGAGCAACCGACTAATTGTCGATTCTGTTGCAAGGAATGGGGTGTTGGGATGCAGATAGAAGGTGATGTTACGAGGGATAGAGTTGAGAGGCTTGTGAGGGAGTTGATGGAGGGGCAGAAGGGGAAAGAGTTGACCATGAAAGCCTTGGAATGGAAGAAACTGGCAGAAGATGCCACCATTCTCAAAGAGGGCTCTTCATTTCTTAATTATGATAATATGGTTCGTCAAGTTCTTTTGAGTGACAACTTGAAATCAACTTAAACAAGTTCAGTATGGACTTTGGATTTCATGTGTAGTGTCATATCTCTCAGCTCCTTTGAAAGATGCAAAGCGAGCTAATACAAGTCTAGTCTAATATTTGTGACCACATATATGAGTAGTCTGTGTGTCT…
Gma.9288.1.S1_at	BG155460	At2g15490	4e-68	Metabolism			GTCAAAGACATTGCAGAGAAAGCTAAAAGAGCCGTGGAAGAAGGTGGAACATCTTACGCTGATGCTGAGGCGTTGATTGAGGAGCTTAAAGCTCGCAGATTGGCNAGACAAGATTAGATTTTTACATAATANNNGNNNGAATTCAGTTNCTAAAGTACGCATAAAAACACAAGAAAAGAAGCTTGTTACTTTCCTGCACCACTTGAAAGTTCTAAATTGCAGTCAGCAACCACAATTTTGGTCGCAATATTGTTGTTGCGGNACCGTCTACCGTANNNNCCCACAATTGCAATGCGAATTTCAATCCCATGAAATACTCAACGTAGCCGAAACAGAATATCAGTATTGCTCTACACTTCTATTCCACTCTTTTTTTTTTGTTTGTTTGTTAAAAGACAA…
Gma.7435.1.S1_at	BU547689	At2g18560	9e-50	Metabolism			GGTTTGTATCGAGAACCCGCAAAGTGGGACTGTTGGTTCCGGAGTGGGCCCAACAGGTAACAATACTGAAGCATCGTTCTATTGGGGGTTTTCTTTCGCATTGTGGATGGGGTTCGACGCTTGAGAGCGTAACGAATGGTATTCCCTTGATCGCGTGGCCGCTGTACGCAGAGCAGAGGATGAACGCGACGTTGCTGGCGGAGGAGTTGGGNCNNGNGGTGAGGACCACGGTGTTGCCGACGAAGAAGGTTGTGCGTAGGGAAGAGATAGCGCGGATGGTGAGGGAGGTTCTTCAGGGTGATGAAAATGTGAAGAGCAATGGCATAAGGGAGAGAGTGAAAGAGGTGCAACGAAGTGCAGTGAATGCTTTGTCGGAAGGTGGTTCGTCCTATGTTGCTC…
Gma.17250.1.A1_at	BI969790	At2g36800	0.0003	Metabolism			GAATGAGACAGAGAGCCAAGGCTCTTAGTAATGCGGCAAAAAAGGCTATAAAGCTTGGTGGGTCTTCTCATAACAATATGATGGAACTGATTCGGGAGCTCAAGGAATTGAAACTCAGGAGGAAGCCTCAATAAATTAAACANGTGCCTAGTCCCAAATCATCACATGTTTTTCTTTAATTAATAAAAGTTTAGGTTTGGAATCGATTAACATGATTAGGAGATCGAGTCTGAACATTCCATGAAACACTTAAAAAAGTATTTATAATCCATCAATAAAATTCTCACAACCACCGT
Gma.6730.1.S1_at	BE211440	At2g36800	2e-72	Metabolism			AATGCTAGAAGCCTTCTCATTCGGGGATGGGNCGCCNTCAAATATTAATATTATCTCACCCTGCTATTGGAGGGTTTATAACACACTGTGGTTGGAACTCTACCTTAGAAGCAATATGTGCCGGGGTGCCAATGCTTACGTGGCCACTATTTGCGGATCAGTTTTTGAATGAAAGCCTAGTGGTGCATGTACTAAAAGTTGGAGTGAAGGTTGGGGTGGAAATTCCGCTTACATGGGGTAAGGAAGTGGAAATTGGTGTGCAAGTGAAGAA
Gma.6730.1.S1_s_at	BE211440	At2g36800	2e-72	Metabolism			GGGTGCCAATGCTTACGTGGCCACTATTTGCGGATCAGTTTTTGAATGAAAGCCTAGTGGTGCATGTACTAAAAGTTGGAGTGAAGGTTGGGGTGGAAATTCCGCTTACATGGGGTAAGGAAGTGGAAATTGGTGTGCAAGTGAAGAAGAAAGATGTTGAAAGGGCAATAGCAAAGTTGATGGATGAGACAAGCGAAAGTGAAAAAAGAAGAAAAAGGGTGAGAGAGCTTGCTGAGATGGCTAACAGAGCCGTAGAGAAAGGGGGATCCTCTTATTCTAATGTGACCTTGCTTATCCAGGATATCATGCAGAAAAACAAGAGAGATGTGTGATAAGTCCAAATTTTGTA
Gma.10650.1.S1_at	AW348549	At4g01070	1e-123	Metabolism			TTTTGGTTCAGTCTTGGGCTCCGCAGCCTCAGGTATTGGGCCATCCATCCACGGGTGGGTTCTTGACCCACTGCGGCTGGAACTCTATTCTGGAGAGCGTGGNTGAACGGTGTGCCTTTCATAGCCTGGNCCTCTGTTNCGCGGAGCAGAGGACCAANCGCCTTTATGCTCACGCATGACGTCAAGGTGGCGCTGAGGCCCAACGTTGCAGAGAGTGGCTTGGTGGAGAGACAGGAGATAGCCAGCCTAGTCAAGTGCCTCATGGAAGGTGAACAAGGGAAGAAGCTTCGTTACCGAATCAAGGATATCAAGGAGGCTGCGGCTAAGGCTCTCGCTCAACATGGTTCCTCCACCACCAACATCTCCAATTTGGCTCTCAAGTGGACCCACAAATTCAAC…
Gma.15687.1.A1_at	CD397262	At4g34135	3e-60	Metabolism			GATTTTGGACCATGAATCCGTTGGAGGGTTTGTGACACATTGTGGGTGGAACTCAGTATTGGAGGGGGTGTGTNGCAGGGGTGCCAATGGTGACATGGCCAATGTACNCAGAGCAATTTTACAATGCTAAGTTTTTGACGGACATAGNTAAGATTGGGGTGAGTGTAGGCGTTCAAACGTGGATTGGGATGATGGGAANGGACCCTGTGAAGAAGGAACCGGTTGAGAAGGCTGTGAGGAGGATCATGGTTGGAGAGGAGGCNGAGGAAATGAGGAACAGAGCNAAAGAGCTTGCTCGAATGGCNAAGCGTGCTGTGGAGGAAGGAGGATCTTCTTACAACGATTTCNACTCATTGATCGAGGATTTGAGNNTCGCGTGCCTGTTGATGATTGTTGTGT…
GmaAffx.56300.1.S1_at	AW348930	At5g66690	3e-36	Metabolism			GCAGGCGGAGATTCTGGGACATCCAGCGACGGGTGGTTTCGTGACGCACTGTGGTTGGAATTCTGTTTTGGAGAGCGTTCTGAACTTTGTTCCCATGGTGGCGTGGCCGCTTTACGCGGAGCAGAAAATGAACGCGTTTATGCTGTCGGAGGAGCTTGGGGTGGCGGTGCGGGTGGCGGAGGAGGGAGGAGTTGTGAGAAGAGAACAGGTAGCGGAGCTGGTGAGAAGAGTGATGGTGGATGAAGAAGGTTTTGGTATGAGGAAGAAGGTTAAGGAGCTGAAAGTGAGTGGAGAGAAAGCGTTGTCTAAGGTTGGATCCTCTCATCATTGGCTTTGTCAAATGAGCAAGGACTGTGAAGCTCATGTGCAGGGTTCTGAGGCTAAAGTTTCTTCTGCTTA…
GmaAffx.58580.1.A1_at	BE824464	At1g63180	5e-09	Metabolism			TTATCGTCTTTTTTAATGGTGCAGGGCAAAATACGGTATAGAGGAAATGTGCAGGGATTTGTGGAATTGGACAAGCAAAAATCCATGGGGATACCAGGGGAAGCATTAAATGAAATTGGGTTGTACTTGGAGGAGGTCTTCCTCCACCATATCATATCATCTCCACTCCAGATATAATATGTTGATGTTTCTTTTGTTGATACAATTGATTGATTGATTCTTTACACTACGTATGTTGTTGGCCTAAATAATTGTCTGATTA
Gma.4250.1.S1_at	AW351160	At3g29360	0	Metabolism	Colanic Acid Biosynthesis		GAAGAAGTTTGATTGGGACCACCCTGCTCATCTTCAACCACTGAGTCCAACTTCCAACAAACAAGTATCTGTNGTCTNGGGATGCCTATGAGGCAATCAAGGATGCACATGGCATCTGCATTATGACTGAGTGGGATGAGTTTAAGAACCTTGATTACCAAAAGGTTTATGACAGCATGCAGAAGCCTGCATTCATTTTCGATGGCCGCAACGTCGTGAATGTTAACAAGCTGAGGGAAATTGGTTTCATTGTTTACTCCATTGGCAAACCTCTAGATTCATGGCTCAAGGACATGCCTGCAGTGGCTTAAAGGGAAAAAGCACAATCTGGAGCTTCCTTTAGGGATGTTGAATTTGTTGTTGGTCTTTCAGAGAGAATGCCCC
GmaAffx.90733.1.A1_s_at	CF808300	At5g15490	1e-112	Metabolism			ATAAGGCCAACCTGAGCATATACGATCCACAAGTAACTGAGGACCAAATTCAGAGGCATCTATCNATGAACAAGTTTGATTGGGATCATCCTATCCACTTGCAGCCCACAAGTCCTACTACTGTGAAGAAGGTCAGTGTTGTTTGGGATGCCTATGAAGCAACAAAGGATGCACATGGCCTTTGCATTCTAACCGAGNGGGATGAGTTCAAGACTCTTGATTACCAGAAGATATTTGACAACATGCAAAAACCAGCATTTGTTTTTGATGGCAGAAACATTGTGGATGCTGATAAGTTGCGTGAGATTGGCTTCATAGTTTACTCAATTGGTAAGCCCCTGGACCCATGGCTCAAAGACATGCCTGCTGTGGCATAAAATAGATCATTGATCAAGTACA…
Gma.14345.1.S1_s_at	BU544949	At1g31070	1e-105	Metabolism			AGGAATTTGCACCAGTGAAAAATGCAAATGGATCCAATGTTGACACTCCAGACAGTGCGAAACTACTTGTTCTTCGACTCCATACTCGTTGGGTAGTTGCTGCAGGTGGCTTCTTAACACATTCAGTGCCCTTATATGCAACAGGT
Gma.5113.1.S1_s_at	BI971033	At5g06060	1e-100	Metabolism			AAACCTGGCTTGTGAATGGGCCAAAGACAACATAAGGAGCAACTGTGTTGTACCATGGGCAACCAGAACCCCACTTGTAGAACATTTGTTGAGAGACCAAAAGTTTGTGGATGATATTATGTCTCGAACTCCGATTAAACGTATAGCAGAACCCGAAGAAGTGTCATCGTTGGTGACTTTCCTTTGCTTGCCTGCTGCTTCTTACATCACTGGACAGGTTATTTGTGTTGATGGAGGATTAACGGTGAATGGATTTCAACCCAGCATGAGAATTACCTGAAATTACTTTCCTTCCATCTTTGTGGGAGTAGAACAACGATTCTCATTTGATTTCAACATGTGTGTGACAAGCCATGTCAATTTCGTTTTTTCTCCCTTCTAGTTGCATATGAAAA
Gma.3881.1.S1_at	X92437.1	At2g30490	0	Metabolism	Cytochrome P450	CYP73A	CGACGCAAAGCTTGGGGGCTATGATATCCCAGCTGAGAGCAAGATCTTGGTGAATGCATGGTGGCTGGCCAACAACCCTGCACACTGGAAGAAGCCAGAGGAGTTCCGGCCTGAGAGGTTCTTCGAGGAGGAGTCGCTTGTTGAAGCCAATGGCAATGACTTTAGGTACCTTCCCTTTGGTGTTGGCAGAAGAAGCTGCCCTGGAATCATTCTTGCA
Gma.8489.1.S1_at	AB030493.1	At5g54770	1e-127	Metabolism			TAGTGTGCCAGGGATGAAAGCCCTTGACATGAACAAGGCAGAGGATGCCATTGTGAAGCTCACTAGGGAGGTTGTGCCTGGCATGATTGTTACTGGGATGGAAGTTGCTGAGATTGATGGTGCTCCAAGGATGGGTCCAACATTTGGAGCAATGATGATTTCAGGGCAGAAAGCAGCCCATCTGGCTTTGAGATCATTGGGACTTCCCAATGCTTTGGATTCTGTAGGAAACGTTCATCCTGAGCTTGTCCTAGCTGCTGCTGAATCTGCTGAAATTGCAGACGCTTAATTAATGTTGCAACAAATTTAAGTTAAAATATCAGTGCTTGCAACTAGAAATAATACTTGTAGTTAGGGAATTAAGCTTTGAAGGTGTTGGTAGTGATCTATTGGGGTGGT…
Gma.10722.1.S1_at	BE823336	At3g55440	7e-84	Metabolism			CTGCCTTTCAAGCTGCTTCGGAAATTGCTGTTTTTGAGTTTT
GmaAffx.89628.1.S1_s_at	CK606096	At3g55440	1e-105	Metabolism			CCAGTTTGGGCCATTGGAACAGGAAAGGTTGCAACTCCTGCTCAGGCTCAAGAGGTTCATGCTGATTTAAGGAAATGGGTTCATGACAATGTGAGTGCTGAAGTTGCTGCATCTGTAAGAATTATCTATGGAGGCTCTGTAAATGGAGGAAACTGCAAAGAATTGGCAGCACAGCCCGATGTTGATGGATTTTTGG
Gma.8179.1.S1_at	CD413439	At3g18860	1e-123	Metabolism			GTACTAAAGATGTCAGCAACCAAGATCATTGTTTAGAGTGTAAAATTGACATCTTTCTGCTGATGGTTGTGCGTTTGTTTTCAATTTCAAAACAANGAGCTGTTGCATTTTAGAGGATTCATTGAGAGTGACACATCAAAAGTAACCTCACAATTACAGATTTCCACCGTTCCTCCGTACTTTGAGACAATAGTTGGAACTTGGAAACCCATGACATGTTATCAGATAGATTGTGTAAACCANTTGAGCAANTTACAGCAACGATGTAGTCTTCCTCTC
Gma.6037.1.S1_at	CD390794	At2g19070	1e-26	Metabolism			AAAGCCATTAGGTTATGCTGCTCAAAAGATAAGGGAAGCAGTTAACGCGGTTACGGGTGAGTATGTAAAGTCACAATTAAGTGTTGGTTTAGGGCAAGAGCAAGTGGATCACATTAGGGCTTTTTTCATGGGACAAGGACACGGTACAAAACCGGCGTATGCTAGGGATCATAACATTCTCCTCACNAGCTGGATGAACATGCCAGTGTATGAAGCTGATTTTGGTTGGGGAAAGCCTATGCAATTCACTTTAGCACATGTGTTTCAACAAGTTGATAGGGTAGGGATTTTTCCAAGCCCAGATGGAGACGGTGTTGTTGTCTACCTTAATTTCGAGACAGCACAATTGCAACTTTTGAAGAAGTTGTTCTACGCGGATATGTATGTATCCTCATTATA…
Gma.1137.1.S1_x_at	BF067710	At5g48930	0	Metabolism			GAACTGCAACCCGATCTAAAAGCGCTGGTTCGTGGGGCTCATACTTTCAAGTGTCCAAACCTTGGTATCACTAGCTGGACTAGGCTTCCAATCCATGATGCTGACTTTGGTTGGGGAAGGCCAATATTCATGGGACCTGGTGGAATTGCATACGAGGGGCTATCTTTCATAATTCCAAGCTCAACCAATGATGGGAGCCTATCTGTGGCCATAGCTCTTCAGCCTGACCATATGAAGCTGTTTAAGGATTTCTTGTATGACATTTGAAGAATCATTGCCTTCAAGCCATATGGAACGCCACAATGTTTCTAGGTGGGGTTTTCTTTCCCCTCGTACCTTTGTTATCTGTCGATGCTTTTGACAAACGGTATGCAACTGTTAATGGGACTCCTTTCAGTT…
Gma.3082.2.S1_a_at	CD404827	At2g42910	4e-49	Metabolism			TCTGGTCATCATGTAGTCATTGTTGATGATTTGGTCCAATCTGGAGGCACCCTGATTGAGTGTCAGAAAGTTTTGGCAGCCAATGGTGCAGCAAAGGTGAGTGCCTATGTTACCCATGGCGTGTTTCCTAACCAATCATGGGAGCGATTCACTCATAAAAAAGACGCCTTGGAGAATGCATTTGCCTACTTCTGGATTACAGATTCTTGCCCTCTTACTGTCAAAGCTGTAGCAAATACAGCTCCTTTTGAAGTGCTGAGTCTAGCCGGGTCTATTGCTAATGC
Gma.3572.1.S1_at	AW310006	At5g14800	1e-106	Metabolism	Amino Acid Biosynthesis/Metabolism		AACTGGCCTGAGTGGCAGTGGTCCTGCTTATGTTTATTTAGCAATAGAGGCTTTGGCTGATGGAGGAGTAGCAGCTGGTTTACCACGTGATCTTTCATTAAGTCTAGCTTCTCAAACTGTATTAGGGGCAGCATCAATGGTCTCCCAGACTGGGAAGCACCCGGGACAGCTCAAAGATGACGTTACTTCTCCAGGTGGGACAACAATTACGGGCATTCATGAGTTAGAAAATGGTGGGTTCCGTGGAACACTGATGAATGCTGTTGTTGCTGCTGCTAAGCGCAGCCGAGAGCTTTCCTGAATCAAGAGATTAGGATTCTACTTTTTTTTTAGACCAAAATCTGATTTCGGTCGAATTTTCAGTCACTATTATGAGAACTTGGGGCTCTTCTTTGAGAG…
GmaAffx.90369.1.S1_at	CF807463	At5g17380	0	Metabolism			AATGCAAATTGTACTCCTATGGCTTTTTATGCTTGAATTA
GmaAffx.90369.1.S1_s_at	CF807463	At5g17380	0	Metabolism			TTAGTGCTATGGAAGTTGAGACGTTGGTNCGGTACCAGCTGCCTGTGGTCGTGATTGTTTTCAACAATGGTGGNGTATATGGTGGTGACCGTAGACNCCCAGAGGAGATAGATGGACCTCACAAAGATGATCCTGCCCCCACAGATTTTGTCCCAAATGCAGGNTACCATGCTTTGATAGAAGCTTTTGGTGGAAAGGGCTATCTTGTTGGGACGCCTGATGAACTAAAGTCTGCTCTTTCAGAATCCTTCTCTGCTCGGAAACCAGCCGTAGTAAATGTTGTGATTGATCCCTATGCTGGTTCAGAGAGTGGGAGGATGCAACAT
Gma.7310.1.S1_s_at	BQ630696	At5g54960	1e-117	Metabolism			TTCGCTGTGGACAAAAGACCATCATCTTTCTCATCAATAATGGAGGTTATACAATTGAAGTTGAGATTCATGATGGTCCATACAATGTGATAAAGAATTGGGACTACACTCGCTTTGTGGACGCTATCCATAATGGGCAAGGCAAATGCTGGACTGCCAAGGTACGTACAGAGGATGATCTGACTGAAGCAATTGCAAAAGCTACTGGACCACAGAAAGATTCACTATGTTTTATAGAAGTTTTTGTACACAAGGATGACACCAGCAAAGAATTGCTGGAATGGGGATCTCGTGTTGCTGCTGCTAACAGTCGTCCTCCTAATCCTCAATAGAAAATCATTTCCTAATTATTGGCCTGTTTTGTGTATTTTGT
Gma.10016.1.S1_at	CA852632	At1g59900	1e-106	Metabolism			AAGAAGTTGACGAAGCCATTGCTAAAGCAAAGGAGAGTCCAATGCCAGATCCATCTGATCTATTTACCAATGTCTATGTTAAAGGTTACGGAGTTGAGACATTTGGTGCTGATAGGAAAGAAGTGAGAGCTACTTTACCATAATTCAGAACTTTGTCCTTTGAATATCTTGCCACCTTGTCGTAGCAGACTCTTCAAAATAGTGAAGAATAAAAGGTTCTACAGAGGGTCATCTCTCTCCCCTATTCGTTGAGTTTCTGCCCGCGTGTATAGTGTGAATTTATTCATATGCTTGGTTAGCAATGGGGCGGGGTTTGTTATTTTTTTGTCATGTAATATTTGCGGATCTAACAGCCAAAGCATCATTGTGATTGATGCAACTGGGGTGTTCTGCAAATTT…
Gma.1111.1.S1_x_at	AW203448	At1g59900	1e-117	Metabolism			GGAAAGTCAAATGCCAGAGCCATCTGATTTATTTACCAATGTATATGTAAAAGGCTTNGGTGTCGAGGCTTGTGGCGCNGATAGGAAAGAANTTAGNGCTANTTTGCCCTGATGGAAAACTTTTCCTTTNNNTTNNTTNNCCTTAGTTTTGGACNNATCAAAATAATGAAGAATAAAAGGTTCAGAAGATCATCTCTGCNTATTTGTTGAGCTTTCCCCNAATTGTATATGAAATTGATTCTTCANTAGCAATGNGGCNGAAATTAATGNTTTGCCATNTAATTTTGGAGGATCTAACACTCATATGACCTCAATTGATTNNGCANGCAACTAGTNTCCTGCAAATTTGGAGGATTTCGTTATGCAAAACCTCCATGNTTGGCAAAATTTTGCCATTAT…
Gma.4529.1.S1_at	BI967748	At1g12000	1e-129	Metabolism			AACTGCACTCACCTCAATGATGGATGTGGAGAGGAGGCATGGTAAATTCAAGCCCGTGATCAAGAAAGCAATGGTGGAGCTTGAAGGGGCACCCTTCAAAAAGTTTGCCTCCTTGCGTGATGAATGGGCCCTGAAGAATTGCTACATCAGTCCAGGTCCAATTCAATTCTCTGGCCCAGGATCTGAAGTAATTAATCACACTCTACTCTTGGAGCTTGAAGCACAAGCTTAGGCATAATATGAGGTCCTTGTTTTGACGGTGGCAATTCATATTGTTTTTTGGGATCTTTCAATATATATTTGATCTGTTACTGTCTAGTGTTTGAGTTTACTTGTGAAATTAATCAGTTAATGATTCTTGAGTTGGTTGATGAGTATGAATTGGTCAACTCAAAAGTT…
GmaAffx.20976.1.S1_at	AW307291	At3g44190	0.0002	Metabolism			ATGGGACTCAATCCAGATATTGTACAAGCTTGACTAGATATCGTGCATGGTGTGTATATAAATTACAAAACCGATCTGTTTCATTGTTTGTGTGGTTTATTGCAGTATTTTCAATTGATTCCTATAAAGAACACATATGTACTATATGTAAAATATCCTTATGCTTAAGTGGTGTTTCTAGAAATCATGAAATGGAATTGTGAGTTAGAAGCAGGATGCTG
Gma.5129.1.S1_at	CF920232	At5g22140	1e-125	Metabolism			ACAAGGGATGTATGCAAGTGCTCATGCTCAAGTGGTTGCCAAGAACCTGAAGCTATTGATAGAGGGAGGAGGCAAAGAGCGTAAGTTGGGAACATACAAGGCACAGCCACCAATATCTATAGTTTCACTTGGAAGGAAAATAGCTGTTGCACAGTTCCCATTCATGACTGTGCTTGGAAGGCTTCCTGGCATGATCAAGTCAGGGGATTTGTTTGTTGGGAAAACCAGAAAGGAATTAGGACTCGAACCTAATGTTAAAAAATCTTAAATTTGGTATATTGAGTGAGTGTTGTGGTGTGTAATTGTGTATATACACTTCTTCAACTCTTTTTCTTCCTTGTCATTGTTGTGCATGTGTAAGTTGATTGTATGTGTTTACTTTCCTATTGTAT
Gma.2635.1.A1_at	BE659549	At1g08250	8e-57	Metabolism			TCCTTTCAAGACGAGCATTGTTTTCGCACACGACAAAGGAACTTCGGTGCTTTTCAAAGTGCTTTC
Gma.2635.1.A1_s_at	BE659549	At1g08250	8e-57	Metabolism			GAACCGTCCGATTAGGCTGGTGGATGACGCGAACGTTGGAACCGCGAAGCACTTTGAGTACTTGTTCTACGTTGATTTTGAGGCTTCCATGGCTGAGGTTAGGGCACAGAACGCGTTGGCAGAGGTGCAGGAATTCACGTCTTTCTTGCGAGTGTTAGGGAGTTACCCTATGGACATGACACCCTGGACACCTT
Gma.4902.1.S1_at	CD398435	At3g15730	0	Metabolism	Phospholipid Biosynthesis		ATGGGTGCTTATCAGCCCTATCATTTGGCTACCAGGCAGCCNGCACGTGGNCAGATNCANGGTTTCCGCATGTCATTGTGGTATGAGCACCTTGGCATGCTTCATGACTCCTTCCTCCAGCCAGAAAGTGANGAATGCATTAANAAGGTGAACCAAGTTGCTGACAAATATTGGGATCTGTATTCTAACGAGTCACTTGAGCATGACCTTCCCGGTCACCTTCTCCGCTACCCCATCGGGGTTGCCAGTGAAGGAGATGTCACCGAGCTGCCAGGATTTGAATTCTTNCCCGACACCAAGGCTCGCATTCTTGGTGGCAAAGCTGACTACCTCCCCCCTATTCTCACTACTTAATTTGATTTTGTACTTTGTTACAAACTTGTTATTGCTTACATCCTA…
Gma.5503.1.S1_at	CD405755	At3g15730	1e-104	Metabolism	Phospholipid Biosynthesis		GTGCCAGAGATTCTGAGATTGCCATGGGTGCTTATCAACCATTTCATTTGGCTGCCAGGCAGCCTGCCAGGGGACAGATCCATGGTTTCCGCATGTCGTTGTGGTATGAGCACCTTGGCTTGCTTCATGACTCTTTCCTCCACCCTGAAAATGAAGAATGTATTAAGAAGGTGAACCAAATTGCTGACAAGTATTGGGATATCTATTCAAGTGAGTCACTTGAGCATGACCTTCCTGGTCACCTGCTCCGATATCCTATTGGGGTTTCCAACGAAGGAGTTGTCACTGAGCTTCCAGGATTTGAATTCTTCCCTGACACCAAGGCTCGTGTTCTTGGCGACAAAGTTGATTACCTTCCACCGATCCTTACTACTTAAGTTTCATTTTATAAGCTTGTTA…
GmaAffx.71432.1.S1_at	BQ742102	At2g42010	2e-80	Metabolism	Phospholipid Biosynthesis		GGGTCTGCAAACATCAACCAGCGCTCTATGGAAGGAACAAGGGACACCGAGATTGCAATGGGTGCGTACCAACCTCATCATACCTGGGCAAGAAGCCAGTATCATCCTCGTGGGCAAATCCATGGATATAGGATGTCACTTTGGGCTGAACATACGGGTACGATTGAAGACTGCTTCTTACAACCAGAGAGCCTTGAATGTGTTAGTAGGATTAGAACAATGGGTGAGCTGAACTGGAAGCAATTTGCATCAAATGATGTAACAGAAATGACAGGGCATCTGCTCAAGTACCCGGTAGAAGTCGATCGAAAGGGTAAGGTAAGATCCCTCCCGGGCCACGAAGAGTTTCCGGATGTGGGAGGAAAGATTGTAGGATCATTCATTGCCATTCAGGAGAAT…
Gma.6611.1.S1_at	U25027.1	At3g08510	0	Metabolism			TGCCTACCTATCTGGGAGCTTAGAAGTGGCATTCGAGCAATTCCACTGCATAGCCAAAAGGGNGATAAATACAACACTGTAAAGCTTCTCATGCGCTTTGANTTTATTAATAATTGATTCTGTGCAGTGCATGTGCA
Gma.7037.1.S1_at	BI969665	At5g20060	1e-98	Metabolism	Lipid Biosynthesis/Metabolism		GGCTTCCGTGCTCAAAGACCTTGAGTAACAAGTTACAAGGGGTAGATGAAGCTACAAGGCGTGCTCAGTCCTTTCCTGTTTTGCTGTGTCATGGAAAAGTTGACGATGTTGTTCCTTATAAGTTNGGTGAGAAATCATCAAAGTGCTTAAGTNCAACTGGATTNCNGGATGTAACTTTTAAAGCTTATAACGGGCTTGGNCACTACACCATTCCAGAAGAGATGGATGAGGTTTGNGCNTTGGCTAACATCAAAATTGGGCCTTGAGGGGAACATTGCTTAGTTAGCAAGCAAAATGTGAAAAATAATTCTTTTCGTTTTTNGTCCATTGTAATTTTATGTTATTGCAGATTTGNTTAGATTTCNGNNNNTGATATGCATAATATATCCGCTACGCATT…
Gma.4663.1.S1_at	AW309696	At1g73980	1e-132	Metabolism			CCACTTCCTTCTTTGTAACTGGACTAAGCAATGGCTCATTGACTGGATCATTGCTACCTAATTCTTCATCATCTTCTCAATTGGCTAATAAAGAGTCTCCCCTGATGGAAGAGGTACTAGTTATTGCACGAGGACAACGTCAAATCATGCATCAACTAGACACTCTGAGCAATTTTTTGCATGAATACTTTGGAGAAAGGTCACGCCTGGGAAGACCAGACCATACAGGAAGAATGCGTGAAGCTGAATCCGTTGCCATCCCCCTGGTTCTGACTCTGGCCTTTGGTGCTGTTGGTGTGCTTTTGTTCAGAGGTTTTACATCCCAAAAATAATGTGTATATATTTTGTTTCTTGTCAAATTGTCATCACTATGTATGAGACAAACTTCATAAGTATATC…
Gma.5819.1.S1_at	BF219559	At2g17630	3e-47	Metabolism			GAGATCTTTGATGAATGTGCCTTTCACTTTGGAGAAATCAGAGCTGGAGGGTGAGTTTATCAAGGAGGCTGCTAAAGAGAAGATGGTGCAGCTCAAGGGACATAGATCAGTGGGAGGTATGAGGGCTTCTATTTACAATGCCATGCCCTTGGCTGGGGTTGAGAAGTTGGTGGCTTTCATGAAGGATTTTCAGGCAAGGCATGCCTAAAGGAGTAACCTCAATCTGAAACAAATACTTGCATTGCATAAACCTAATGCCTAAAGGATTTTATGCTAATAAAGTGTTTGTCTGGTATTCAGAAAGGGTCACAATCTCTTGTCAGTTTTTTGCTTTCTTTAGTTAGGTATCTTTGCTGTCTCTTTTTGTTTACTTTCTTGTTCCATGTTTGATATTCAAAT…
GmaAffx.32084.1.S1_at	BE823130	At5g57190	1e-138	Metabolism	Phospholipid Biosynthesis		GTGATTTTTCGTTTGGCACCACAGGATTATCACCGTTTCCATTTTCCAGTATCAGGAATTNTTGAGCAATCTGTAGATATCCCTGGATGCTTGTATACTGTGAATCCCATTGCTGTAAATAGTAAGTACTGTAATGTCTTCACGGAGAACAAGAGAGTTNTTTCAANANTTTCAACTGTAGATTTTGGAAAGGTGGCATTTGTTGCAATNGGAGCTACAATGGTTGGTAGCATTACTTTTACAAAGAAAAAGGGCGANTATGTTAAGAAGGGAGATGAGTTTGGATATTTCTCATTNGGTGGAAGCACNGTAATTTGCGTTTTTGAANAGAATTCAATTGCAATTGATGAAGACCTTTTAGCAAATAGCGCCAGATCANTGGAGACCTTGGTTTCTGTA…
Gma.15483.1.S1_at	BE820423	At1g23190	0	Metabolism	Sucrose Biosynthesis		AACACTAGTGTTGGTTGTTTGCAGCCTTTGCTATGGGCACTTGAGTGGAATTTGATCAGTTACTTTATCAAAATTTTGATGTGCTGAATAAGTTGCAACTGCCGAGTGCTAATTCTATTATATNGTCNTAATATGATGGCTCCTCTTGTATTGGCGTTTTATTAGGAGCATTCTTTCCTTCCTTTTTTTTTTGGTCCCTGCGGTGAGATTTGACTTCTCTCCTAAACTAACTTTGGAAGAAGATAGATGGCCACCACCAGCTGAACAAAGGCTAGCCGTTTCGTTGCAAATA
Gma.15483.2.S1_a_at	AW309524	At1g23190	9e-39	Metabolism	Sucrose Biosynthesis		GATGGATCACGATTGATTTTCCGCCTATCTGGAACTGGNNNNGNNNNNNGCAACAATTCGANTATACATTGAGCAATATGAGAAGGATCCATCAAAGATTGGGAGACTTTCAAANGAAGCNCTTGCTCCTCTTGTGGAAGTTGCNTTGAAACTTTCGAAGATGGAAGAATTCACTGGTCGATCCGCTCCAACAGTCATTACATGAACACATTCAAGTGGAAGGTGGTTAGATCCTGAAGCTTCTCCCAGTCATTTCATTTCTTCTTTGTCCAGTATCTTACGGATAGCCGAACAGTAGATTTGGTTGTTTGCAGCCTTTGCTATGG
Gma.6263.1.S1_at	AW311303	At1g79550	1e-173	Metabolism			AAGACATTTGGTGAAGCATTGGATANGACNCAGACCNTNATTTGGAATGGACCAATGGGTGTTTTTGAGTTTGATAAGTTTGCCACAGGAACAGAGGCNATAGCCAAGAAACTGGCAGAGCTGAGTGGGAAGGGAGTNACNACCATCATTGGAGGAGGTGACTCNGTTGCCGCTGTGGAGAAGGTTGGNCTTGCAGACAAGATGAGCCACATCTCCACTGGTGGTGGTGCCAGCTTAGAGCTTCTTGAGGGNAAGCAACTCCCTGGTGTCCTTGCNCTTGATGATGCTTGAGNAAANATCANTNGTTCCTNTGNANTTTGTGCTTTATATTATTATTATGGTTGGNTTTCAGCCAACAGTGGATTNAGGTACAATGAGAGNNGCNNNNTNTTGCTCCTG…
GmaAffx.39202.1.S1_at	AW395777	At5g59420	3e-55	Metabolism			ATTTCAGTATACACATTTTGCTCATAAAATAAACAGCTTTGACACTGCCCCTANAAAGTTGTTGGCNTCAGATTCTCGNCTACGCCCAGATAGATATGCACTCGAGATGGGCGATCTGTCAAAATCTGGGNCAGAAAAGAGCAGTTTGGAGGANAGGCAGCGTGCTGAAAAGAGAAGCCGAGAGGAGAAAGGGCATAGCTTCACACCAAGATGGTTTGATTTAACTGAAGAAGTGACANCAACTCCTTGGGGTGATTTGGAAATCTATCAATATAATGGTAAATACANTGAACATCGNGCTGCTGCAGATAACTCNGGAAGCATTGATGATGTTGATGNTAAATCAATTGAATTTAATCCATGGCAGTATGGTAATTTGGTCACGGAATGAACTAGTTT…
Gma.16522.1.A1_at	CA851253	At5g46180	1e-40	Metabolism	Amino Acid Biosynthesis/Metabolism		AAATTTGTTCCCTGTATCTGGCTATGAGCTATGCAAAAAATTGAAGTATAGAGGAGTCCTTGCCAAGCCAACACATGATACAATTATCCGCTTTACTCCCCCACTTTGCATAAGTCTGGATGAGATCCAACAAGGTTCCAAGGTCCTGGCTGATGTTCTGGAAATTGATCTACCAAAGTTGCAGAAGACANAGCCAAAAGATGCTGCTCCGGTTGCCTCTAGTGCATGTGATCGTTGTGGTAGAGTCTTGTATTAACCATATAAAGACGTATAGATTGCATGTACCTTTAATTTTCCTTGGAAAAAATTATCACATGAAGAATGTTATTCCTTATACATGAACCCCTGGAAACTATGCTCCAATATTCCATATATCATCATAATTTAAGGCCATGATAT…
GmaAffx.83780.1.S1_at	BM886753	At4g21580	1e-132	Metabolism			CCTTGTTGGTTCATGGAGGTTCCAGTGGGATTGGTACATTTGCAATTCANATAGCCAAGTATCGAGGGTCACGAGTGTTTGTTACTGCAGGAAGTGAGGAGAAGCTAGCTTTTTGCAAGAGTATCGGAGCTGATGTGGGCATCAATTATAAAACAGAAGACTTTGTTGCGCGGGTNAAGGAAGAAACTGGTGGCCAAGGTGTTGATGTTATTCTTGATTGTATGGGAGCATCCTACTATCAAAGAAATCTTGATAGCTTGAATTTTGATGGAAGGCTTTTTATTATTGGCTTTCAAGGTGGGGTTAGTACACAAGCAGATCTACGCCCTTTACTTGCTAAGCGTCTCACAGTACAAGGAGCTGGCTTACGCAATAGAAGTCTGGAAAATAAAGCTGTGA…
Gma.15066.2.S1_at	BG044740	At1g20270	1e-109	Metabolism			GCTCACTATAGTTTTATTCCTGTTGAGCATGGTGAAGGACTTCAAGTTCTGCACTATGAAGTTGGACAAAAGTATGAGCCTCACTANGACTACTTTCTTGATGATTTTAACACTAAGAATGGGGGTCANCGTATAGCAACAGTGCTGATGTACCTTACTGATGTTGAAGAAGGGGGTGAGACAGTGTTNCCAGCTGCCAAAGGGAATTTTAGTTCTGTGCCATGGTGGAATGAGCTTTCTGAGTGTGGAAAAAAAGGACTTTCNATTAANCCNAAGAGGGGNGATGCTCTACTTTTTTGGAGNATGAAGCCAGATGCAACTTTAGATCCA
Gma.13185.1.S1_at	CD397475	At1g22950	3e-25	Metabolism			TACAAGTAAGCTATGGTTCCTGATAGTGTATGTACAAGGTATCTGCTGTATTGAGATAGTTTTCTTCAAGTGAGCTTTGGATTTTTCGTTAAAAACTGTGCGGTTTGTCTGATGCCTATTTATTGTCTGAGGAAGGGGTGAGCTGGTTGTGTTATGTAGGCTGGTTTAATGCTCAGACCTTTATTTTTTTGGCATAAAACCGCAGAATCATGTCAATAAATTTAGATTTAGACTGTAATTAATGTATTCTGAAATCTTTTAGGTTC
Gma.16580.1.S1_at	CD404403	At1g19600	1e-147	Metabolism			GAAAGATGATCCTATAGCTGCTGTAGAATTTCTTTCCAAATACTGCCAATGGGCTGTTGTAACATTGGGTGCTAATGGGTGCATTGCCAAACATGGAAAGGAGATGATACAAGTCCCGGCCATTGGGGAAACAAAGGCAACCGATGCTACAGGAGCAGGGGACCTTTTTGCAAGTGGATTTTTGTATGGAGTGGTCAAGGGTTTGTCACTAGAAGAATGCTGCAAAGTAGGCACATGCAGTGGTGGATCTGTTATCCGGTCTCTTGGTGGTGAGGTAACGTTGGAGAATTGGCAATGGATGTACAAGCAGATGCAGATAAACGGTCTGCCCACGCCTNCCGGTTTATGCAAATGAATAGTAGCAACCGTTGCCCCCTTAATTTGTGCTGTCTTATATTT…
Gma.2139.2.S1_s_at	AW350419	At3g59480	1e-156	Metabolism	Sucrose Biosynthesis		GTCATTGTGGCACCCCAATTTGAAGTTGCTCCTTGTCACTCTTGGGGAACATGGTTCCAGATACTACACCAAGAGTTTCAAAGGATCGGTAGATGCTTTCCATGTCAATACAGTTGATACAACTGGTGCCGGTGATTCCTTTGTTGGTGCTTTATTGGCCAAGATTGTCGATGATCAGTCCATACTTGAAGATGAACCAAGGTTAAGAGAAGTACTAAAGTTTGCAAATGCATGTGGAGCTATTACAACTACCCAAAAGGGAGCAATTCCGGCCCTTCCCAAAGAGGAGGCTGCACTGAAACTGATCAAAGGGGGGTCATAGAATCTTTTGGCAAAATGCAAAAGTGCTAGCATGATTTCGTTTTCTTCCCCTAATGTTTAAATTTTCCGTTGGATTTG…
Gma.2439.1.S1_at	BI972053	At1g03210	7e-41	Metabolism			GAATAAGATGGTCAGGTCAGTGCTTTAGTTTGCAGGCCCNGCGTNTGGTNTCATCAGTTCAAATCAATGCCAAAT
Gma.2144.1.S1_a_at	BE821591	At4g11010	2e-93	Metabolism	Nucleotide Biosynthesis/Metabolism		TATCACGACCTGAAAGAAAGACCCTTCTTCGATGGGCTGTGTGATTTCCTTAGCTCTGGCCCTGTTATTGCAATGGTGTGGGAAGGACAGGGAGTTATTTCCTATGGCCGAAAGCTAATTGGAGCCACAGATCCTCAGAAATCAGAACCTGGAACCATTAGGGGTGATCTTGCTGTTGTTGTTGGAAGAAATATCATTCATGGGAGTGATGGTCCTGAGACTGCCAAGGATGAGATTAAGTTGTGGTTTAAGCCAGAGGAGTTGGTTAGTTTCACTAGCAATGCAGAAAAGTGGGTTTATGGTGTCAACTGATTCTTTCCCTCATGCCTTGGGTTTTCTATAACAACTGCTCAGTG
Gma.10764.1.S1_at	AW348613	At1g11680	1e-174	Metabolism	Cytochrome P450	CYP51A	AAAGAGTATGACATTCCCAAGGGTCATATAATTGCCACATCACCTGCTTTTGCAAACAGGCTAGGTCATGTTTTCAANGACCCTGATAGGTATGATCCNGATCGATTTGCTGTGGGGAGGGAAGAGGACAAGGTGGCAGGTGCATTCTCATACATTTCATTTGGAGGGGGCNAGACATGGATGCCTTGGGGAGCCATTTGCATATCTGCAGATAAAAGCAATATGGACTCATCTG
GmaAffx.90006.1.A1_at	CF805731	At3g12120	7e-38	Metabolism			ATTAATGTAGCCGAGGCTTCTTTGAACTTTCCCTTGTGACTGTTTAGTATCATGGTTGCTTATTGGGAATAATTTTGTTGAACCCTGATGTTGGTAGTAAGTATCTAGACAGTTGCATAGCGGTTTTGTTTACAGAATAAGATATAGCCTCTCTGAACAGTTTGATTATTGCACCATGGTTTGCAATCGGTGCATGTCGACCAAGTTTCTCAAGACTGTGGAGAA
Gma.2736.1.S1_at	BQ742884	At5g57020	5e-06	Metabolism			ATTGGGATTCATTATGGTTTTGCTATAGACATTGTATGGTTGCAAATTATGTGGTGATCCCCGGTTAGACCTTAAATTTTGTTTTACCTTTCGAACAAACAAGTTTTACATAGTCCTCGCTGGCAATTCTGGAATGTCAGTAATGCCCCAAACTGGTATAACTTACAGATTGGTAATTCCTGTTTACAAATTTTG
Gma.6843.1.S1_at	CD402735	At2g28760	1e-179	Metabolism			TGTCCGGGAACACAAACTCGAAGTTTCTGNTATGTCTCTGACCTGGTTGATGGCCTTATCCGTCTCATGGNAGGATCAAACACCGGACCAATCAACCTTGGAAACCCAGGTGAATTTACAATGACTGAACTTGCTGAGACNGTNAAAGAGCTTATTAATCCAGGTGTGGAGATCAAGATGGTGGAGAACACTCCTGATGANCCNCGACAAAGAAAACCAGACATCACAAAAGCAAAGGAATTGTTGGGCTGGGAGCCAAAGGTCAAGTTGCGTGATGGTCTTCCTCGTATGGAAGAGGATTTCCGTCTGAGGCTTGGAGTTGGCAAAAAGAATTAACTTGTTTTTCGCTCCTTTGGTGACATGTTAAAGTAGAATAATAAGTGAGATGGGTCTGGCCCG…
Gma.2211.1.S1_at	AI442877	At3g53520	1e-162	Metabolism			GTTTACCATGTTAGAGCTTGCTCAGGTTGTNAAAGAAACAATTGATTCAAGTGCTACAATAGAATACAAACCAAATACTGCTGATGATCCACACATGAGGAAGCCAGATATTAGCAAAGCNAAGGAACTGCTGAACTGGGAGCCAAAAATCCCNCTGAGAGAAGGGTTGCCTCTNATGGTTAATGATTTCCGAAATCGNATTCTGAATGAANACGAAGGAAAAGGGATGAAATAAGCATAATAGCAAACCCTGTATGTATATGGAGATGAGCNTGTCTCCTTCATTTTTTNGTTCTNATTTGCGGTCAGCATCAACAGAAAAATTCTGGNAACACGTCANNNNNNNNNNNAGATATANCTACTGCTGGCCTTTTNACATTTAATCATTTATGCTTGCTT…
Gma.1195.1.S1_s_at	AI442801	At3g27890	2e-61	Metabolism			GAAATTTCGGAGCTTCCCATGTTGAACACTGATCTTGAGATCAATGGGACCTACCCACCAATAGTTGAAGCTTTTCGTCAAAAGATTCTTCAAGCTGATAGTATTCTCTTTGCTTCTCCTGAATATAATTACTCTGTCACAGCTCTACTAAAGAATGCAATTGATTGGGCCTCTAGGCCCCCAAATGTTTGGGCTGGCAAAGCTGCTTCAATTGTAAGTGCCGGTGGGGACTTTGGTGGGGGAAGGTCACACTATCATCTTCGCCAAATTGGAGTGTACATTGATCTTCGTTTCATCAATAAACCAGAATTCTTCCTTCTTGCATTCAAACCACCACCAAAATTCAATGATGATGGTGACTTAATTGATGAAGAGGCCAAGGATAAGTTGAAGCAAGTT…
Gma.14360.1.S1_at	BI943706	At5g16990	2e-36	Metabolism			ATACAACTCATTCGTTCTTACAAGAACTGAGTTCTGTTCAACATACCAAAGAATCCCCTACCTATAGCTATTGAGAGAGGGTGTGTTTACACTTTGGAAATGGCAGAGAAAGAAGTGAGAAACAAGCAGTTGGTATTAAGGGACTATGTCACTGGCTTTCCCAAAGAATCTGAATTATATGTGACTTCCAATGGTACCATCAAACTGAAGCTAGAAGGTGACTCCAAAAGGGTTTTGGTCAAAAACCTCTTTTTGGCAGCTGATCCACACCTCANGCCCTTGATGAAGAAAGCTGATAACCTTAGTGTTTTGCAGTCCTTCACCCCTGGCTTACCACTGTATGGATATGGAGTGGCTAAGGTTGTGGATTCTAGGCACCCTGATTTTGAAGAAGGTGAC…
Gma.8065.1.S1_at	AW309960	At5g16990	1e-130	Metabolism			ATATAAGCGGATTCGTTTGCAAGGCTTTAACTTCATGGATTTCGTTCACCTATATCCCAAGTTCTTGGAGTTTCTCCTGCCAAATATCAGAGAGGGGAAGGTTGTGTATGTGGAAGACATAGCTGAGGGGCTTGAGAATGGACCTTCAGCATTGGTTGGCCTTTTTAGCGGTCGCAATGTTGGAAAACAAGTGCTCGTTGTTTCTCATGAGTAAAAAGCATTTGTTTCTTGTGTTCA
GmaAffx.92176.1.S1_s_at	CF807901	At5g16990	1e-97	Metabolism			GAAGGCCCTCCCAATAGTCGTGCTTACACTCCTGGCTCTCCATTAATAGGATATGGTGTGTCTAAAGTCCTGGAATCTGGGCACCCAGATTATAAGGAAGGTGATTTAGTGTGGGGCTTTACCAAATGGGAAGAGTATAGCTTGTTACCCTCAGCTCAAATACTCTTCAAAATTGAGCACACTGATGTTCCACTTACCTACTACACTGGAATTCTTGGTATGCCAGGAGTGACTGCATATGCAGGTCTATTTGAAGTAGGATCTCTTCANAAAGGAGAAAATGTTTTTGTTTCGGCTGCCTCTGGCGCAGTTGGTCAACTTGTTGGGCAATTTGCTAAACTGAATGGTTGTTATGTAGTTGGAAGTGCTGGATCTAAAGAGAAGGTGGATCTGCTGACA…
Gma.6005.1.A1_at	BM188184	At5g61510	4e-48	Metabolism			GGGATCTTTGGCATGCTTGAAGCTTAGGGGCTACATGGTAAGTTTTGGGCAGTCATCTGGTTCACCTGATCCGGTTCCATTATCTTCCCTGGCNNNNNAANNNCCTTTTCTTGACTAGGCCTAGTCTAATGCAATATGTTGTCACTCGGGATGAGCTGTTGGAGGCTGCTGGAGAGGTGTTTGCTAACGTTGCTTCTGGTGTGTTGAAGGTCCGTGTTAATCATACTTACCCATTGTCTGAGGCTGCAAAAGCACACGAAGACCTGGAGAATCGAAAGACNTCAGGATCTGTTGTGTTGATACCCTAAGACTCTCAGTTGTGTATGTGTTATACACCAAGTCCTTGTTT
Gma.1370.1.S1_at	BQ079614	At2g15230	1e-132	Metabolism			GATGATCCGCAAAGGTACCTACTCCAAGTATGATTATGGAAAGCTAAAAAATCTGATAGAGTACGGCAAGTTCAATCCACCAAAGTTCGANCTTAGTCGCATACCCAAATCATTGCCTCTGTGGATGGCNTANGGTGGAAATGATGCTNTGGCAGATATAACTGATTTCCAGCACACACTCAAGGAATTGCCATCCNCACCGGAAGTGGTTTATCTTGAAAACTATGGTCATGTTGACTTCATTTTAAGCTTGCAAGCAAAACAAGATCTTTATGACCCTATGATTAGTTTTTTCAAGTCATCCGGAAAATTTAGTAGTGTGTAAATTTCCTTCATTCCGGTATGATGGATGCAATACAATGGTCTACGTGTTTATATATTACTGCACTTTCTGTAAAG…
Gma.7613.1.S1_at	BG508937	At3g05970	5e-66	Metabolism			GTGAAAATTGAGAGTCTCCCCCCATCACCAACCACAACATAAAAAGAGAGAGGTAAATAAAGACACGCTACTCATACGCATCGTATGCAACATAGCAGAAGCATCCAATGGGAACGATTTTGCAACTTACTGTTGTATTGTATTGATAATAAAGAGTTGTGCTAGAACCGGAATATGATTCGTAGCATTATTTATGTAGCCTACGCTCCGTTACGTTCAAGTTGCCTTACGCCATTTTTATAATT
GmaAffx.12706.1.A1_at	BE657524	At2g04350	5e-11	Metabolism			GCCTAGTCACTGCTGCTCTCAAACTCAAGAGAGAGGCCATAAAAAAGACTTTTGATGAAGAACTTTCTGAGTTGTATGCTTCATAGGCTTAGGACACTAGTTAATCTTTTTACACCTTTTTCCCATTTGCATATAGCAGGGGTTGAGGTGAGGAGAGGTTTTTGAATTTTTTTGTTGCTAATCATTTTTTTTTTTCATTTGAAGTTTATCATGCACAGTGAGGCTTGTTACGTGCAGAAGGCCAACATGTTGAATTTACTTTAGTGACA
Gma.2876.1.S1_s_at	CD396422	At5g43330	1e-167	Metabolism			GCCTAAATTAGACACCATTGCTTTTTGTCTACTGTCCTTGTTAGTAGGTTCCCATGTTTTGCCTATAGAAGTGTAGCTTCAATTTTGAATAATGCTCCTTCTAAGATACAAAGGAACTATCACTGGAGAAGAGTCTGTTTTTCATTGGAATTACTTGTATTTCAACATCTAATCCTTTTAGGAGGAGGATATTTGAGCCCATGGGCCGCATATTGAATTTTGGATTAGTCCTAATTTTATGTGCGTTAGTGCCCCCGGTTGAANNNNNNNNNGTGTTTGTGGTGGNTGTACAAGATTTTTGATGTATGTGGGATGCACAAAGCGTGCAAACATATACTTCTAGGCCTTGTGGTCGAGTATTATG
Gma.1535.1.S1_at	L01628.1	At2g22780	1e-152	Metabolism			GAGTACCTGACTGGTCGCATACAAAACGGTGGAACTGAAGTTGTTGAGGCCAAAGCTGGAGCTGGTTCTGCAACACTATCAATGGCATATGCTGCTGTTAAATTTGCAGATGCATGCCTTCATGCCCTGAGAGGAGATGCTGGCATCATTGAATGTGCATATGTTGCTTCACAGGTGACTGAACTCCCATTCTTTGCATCAAAAGTACGACTTGGCCGAGTTGGGGTGGAGGAAATTCTTCCTCTTGGTCCCCTGAATGATTATGAGAGGGAGAGTTTGGAAAAGGCCAAGAAAGAGTTAGCAGCAAGCATTGAGAAGGGCATTTCTTTCATCAGAAAATGAGTAGTTGATGATAGTACGTCCCGAAAATAAATGGTTAGATTGTGCTGTGTCCATTGT…
Gma.4408.1.S1_at	CD405342	At1g79750	0	Metabolism			GTAGTTGGACTAAAAAGGTAGCTTGAAAATTTGTGTTCTGCTATAAATGTTATGTGACAGTAATCTAAATTAGAAAANNAANNANNNNNAAANNNNNNNNNGTATATAAAATNNNTGAAAAGTTGTTGAANNANNNNNNNNNNNNNNNANANNNNAANNNNNNACTGTAGATATCTTATTAACACCTTTCTTTGTTGTAATAAT
Gma.11126.1.S1_x_at	AI960156	At5g11670	1e-160	Metabolism			AAGTCCATTTGATCCTGTAGAATACAAGGGCAAAGTGTACTATTCTGGCCAGGCCAACAATGCNTACATNTTNCCCNGGNCTTTGGTCTNGGGNTTGGTAATCTCAGGAGCAATCAGAGTGCATGANNGATATGCTTCTAGCAGCTTCGGAAGCCTTGGCTAAACTNGTGNCCNANGAGAACTACGAAAAGGGCTTGATTTATCCACCATTCTCTAACATCAGANAAATTTCAGCTAACATAGCNGCAAGTGTAGCTGNCAAGGCATATGAGCTAGGCTTGGCTAC
GmaAffx.90332.1.S1_at	CF806057	At5g25880	3e-20	Metabolism			GAATCTTCAACATTATTCTCATGTAATTTACAGCGGAAGCCTTGGCTAAACTGGTGACCGAGGAGAACTACGAAAAGGGCTTGATTTATCCACCATTCTCTAACATCAGAAAAATTTCAGCTAACATAGCTGCAAGTGTAGCTGCCAAGGCATATGAGCTAGGCTTGGCTACACGTCTCCCTCGTCCTCAGAATCTTGTGAAGTATGCTGAGAGCTGCATGTATACCCCTGTCTACCGAAACTATAGGTGAATTATGGGGCAAGTCACTTAACTTTGGCTGTAATAAACATATGTTTTGGTGGCATATGTGAGTTGTTTTATGTAACTTACGCATAAGTGAGAGTGGTCTTATGCTTTTTATTACGAAATCACCAAAACTGCAGGTGAATCATGCTTTT…
Gma.6540.1.S1_at	AW309284	At4g39330	4e-86	Metabolism			GTTGCCCATCTTGGAATTGCTCAAAGTCAACGGGACCTTATTTCTCGTGGGTGCACCAGACAAGCCCTTACAATTGCCNGCTTTCCCATTGATATTTGGCAAGAGATCAGTGAAAGGTGGGATCATAGGGGGAATAAAAGAGACGCAGGAAATGTTGGAGGTTTGTGCAAAGTACAATATAACGAGTGACATTGAATTAATCACACCAGACAGAATCAACGAGGCTATGGAGCGCCTTGCTAAGAATGATGTGCGCTACCGTTTCGTCATTGATATTGCTAATGCTGCCGCTTCCAACAACTAAACTAGCCTTCAATTCGGATCAAATTTTACTTGTTTCGATATTTACTGTTTAATAGACCCGTGATTTTACCTCTGCAATTGGACGAATAAGTCATA…
Gma.6752.1.S1_at	BU544731	At1g03090	0	Metabolism			GCATATTCATATTTGGCAAGGGTCCTGTCATCATTATTTCAGAGAGAAACTAGGCCTGNAGCTGTCTGAGGATGAAGAATCCCAACATAAACCCAAAGTTGAAACATCAGCCAANCCTCAAGGGACAGTTGTAGCACCCATGGCAGGCTTGGTAGTTAAGGTTCTAGTGGAGAACAAGACAAGAGTGGAGGAAGGACAACCTGTGTTAGTATTNGAAGCAATGAAGATGGAGCATGTTGTAAAGGCACCTTCNTCTGGCTATGTGCATGGGCTTCAACTTNNGGTGGGTGAACAGGTTTCAGATGGCAGTGTTCTTTTCAGTGTAAAGGATCAATAAAATCNCACTTGNNNNACNGCTTTNCGCCAAGACTTTGNCAAGGGGGACATTATCTGGANNNN…
Gma.2387.2.A1_at	AW309516	At2g44160	2e-11	Metabolism			TGGTCAAGAGGATGCATCACCCTCAGGGTACAAGCTACTTCTTGGTGAGTTTGGTCGACAATGATTACATCAATGGTGATCTTTTCACCGTCTTTGCAGATTTCTGACATGAGCTTATTATTTATTAGTTCTTTAGTTATGTCACTTCTGTTCGTTGTCATGTTCCTTTCCTTTCTTTTGTTTTCTTCTCAGTAGGATGGTTCATATTACACGTGGTTCTAAGTTGAAGTACCAAATTATTTTTCTGGGCTTTGTCCCAAACATCTTTATTTTTTCATTCTTCTGAGTCGCATGAGTAACCTGT
Gma.9908.1.S1_at	CD399899	At1g63940	1e-130	Metabolism			GCAACATCAGTGGAGGAGGCCCTAGAGATTGCTCGGGAATCCTTGCAAGGCGAAGCTGCTGTCTAGTACCGATCTTGGTAACATCATTCTGTAATTTATCTTCTCTTACGGCCAGATTATCAGTGACTATCTGTCATCATCTGAGTAGGGATTGCTCCTTAAGAGAATAATTTTCATTACATTCTCAGTCACCTGACATTAGTAATGGTTTTTAACTGGAATGTCTNNAATTTGGATTTGATCTGGTGCCATAAGGTATCCTTGAATTTTCTCAATAATTTAAGATAGCCTTTGCCTTTNNANNNNANNNNNATTTTCCAGCAATGTGATTTTTGTTCTTAACTTACTACCTACAACCCTTCTTCTGAAGGGACTCCTGTAGGGAATTCTGTCTGC
Gma.5803.2.S1_at	BU761097	At3g09940	9e-15	Metabolism			CGAGCGGCACGAGATACTGGATTAAAGATGGGAAAGTTGTTGGGGTCTTTCTGGAAGGTGGAACTCCTGAAGAGAACCAGGCTATTGCTAAAGTTGNTAAGGTCCAGCCTCCGGTTGCAGATGTAGATCAACTTGCTAAGGAAGGCCTTTCCTTTGCTAGTAAAATATAATGGTTTTAATAGGGAAGGATAAAAATGCTTGGTGGTTTGCATAGAAGATTGTATCTGATCTGGCTTTATTTTACTCTGAATTATGCATTACAGAAACTTTATTTTGTGTTTTTCGTTTGATGTGGTTGCACGGGATATATATATATATATTGCCGTATCTATTTCATTTCTCTGGCCACTTGTTGGGTTCTGTTTACGATTTCCAGACTTATAAACGCATCTATTTGCA…
Gma.1179.1.S1_at	AY096000.1	At3g16150	1e-159	Metabolism			GCGCATCGGTGATTCGCCGCTGATAGGCGCCGGGACCTACGCGTGCGACGTGTGCGGCGTATCGTGCACGGGTGAAGGCGAGGCCATCATACGTGGCACGCTGGCGCGTGAGGTGGCAGCGGTGATGGAATACAAAGGCTTGAAGCTTCAAGAAGCCGTGGATTTTGTGATCAAGCACCGTCTCGATGAAGGGATGGCTGGTCTCATTGCTGTGTCCAACGCTGGGGAAGTGGCTTATGGTTTCAATTGCAATGGCATGTTTAGGGGCTGTGCCACTGAAAATGGCTTCATGGAGGTCGGAATCTGGGAATAGCTTCATTATTTTCCTTCATGGTTNGTTTCGATGCAACTTTTGGATTTCTGTACCATGTTCCACTGTAGTGTAGGGTCTTTCTGCTG…
GmaAffx.93598.1.S1_at	CF809323	At1g01470	3e-59	Metabolism			ATCATCATCAATAATGGCGGAGTTGTTGGAAAAGGCCAAAAACTATGTTGCGGAGAAAGTCACCAACATGCCCAAGCCAGAGGCGAGTGTCACCGACGTGGACTTCAAGCGCGTGAGCCGCGACAGCGTCGAGTACTTGGCCAAGGTCTCCGTTCAGAACCCTTATTCCACTTCCATTCCCATTTGTGAGATCAAGTACTCCCTCAAAAGTGCTGGCAGGGAGATAGCAGCAGGAACAATACCTGACCCAGGGTCATTGAAGGCAAGTGACACAACAATGTTGGATGTGCCAGTGAAGGTGCCTCATAGCATATTACTGAGCTTGGCAAAGGACATTGGTGCAGATTGGGACATTGATTACCAATTGGATATTGGACTTGTTATTGACCTTCCTGTCAT…
Gma.2183.1.S1_at	CD402949	At1g08630	1e-155	Metabolism			GAAAGCTAGACTTTTGGCTGATGGATTAAAAGAAGTTAAAGGACTGAGAGTGGATGCTGGTTCTGTGGAGACCAATATGGTATTTATTGACATTGAAGAGGGTACAAAGACTAGGGCAGAAAAGATATGCAAGTACATGGAAGAACGTGGTATCCTTGTGATGCAAGAGAGTTCATCAAGAATGAGAGTTGTTCTCCACCACCAAATATCAGCAAGTGATGTGCAATATGCATTGTCGTGCTTTCAGCAAGCTCTAGCTGTCAAGGGAGTACAAAATGAAATGGGCAACTAGTGGAAGAATTTGAATATGGCACGTTGCTGCCATATTAGTCATTAAAAAGGAATTCCGTGTTCCATTTGCCTTTGCTCATTTGATTTTCTTAAATGTACCCTAAAGAA…
GmaAffx.11224.1.A1_at	CD416193	At5g08415	2e-19	Metabolism			ATCTATTGGTTTTCGTTACGTAGCTAGTGGTCCACTGGTGAGATCTTCGTACAGGGCTGGGGAGCTGTTTGTCAAGACAATGGTACGGGAAAAGACCAAGAATGTTGCTGACTCGTTGTTATGATCTTTAGGTTCTGCGATTATGTATATTAGGCAACAACAACTGACGAGGTTTTGGCATGTTCATTGCTGAGGAGAAAATGTGTGCGGGCAGAAAATTCAATACTTTTGAAGTCAATCAGCTTTACGTATTCTTTGAACCAG
Gma.11166.1.S1_at	AW705829	At1g55020	1e-156	Metabolism			AATCCAAATTGGACTGATGACACAAAGGCAATTCAAGCCTTTAAGAAGTTTGGAAACAAGCTGAAGGAAATTGAGGACAAAATCTCAGGGAGGAACAAGAATTCAAGCCTTAGGAACCGTAATGGACCGGCGCAGATGCCCTACACTGTGCTTCTTCCTACCAGTGGGGAAGGCCTTACTTTCAGAGGAATTCCCAACAGCATCTCTATCTAATGAGAGTGTGTGGTGTGTGGTGTGTGGTTTTCTTTCCTTCCAACGTACCTCTCATTGACAAAT
Gma.11166.1.S1_x_at	AW705829	At1g55020	1e-156	Metabolism			AATCCAAATTGGACTGATGACACAAAGGCAATTCAAGCCTTTAAGAAGTTTGGAAACAAGCTGAAGGAAATTGAGGACAAAATCTCAGGGAGGAACAAGAATTCAAGCCTTAGGAACCGTAATGGACCGGCGCAGATGCCCTACACTGTGCTTCTTCCTACCAGTGGGGAAGGCCTTACTTTCAGAGGAATTCCCAACAGCATCTCTATCTAATGAGAGTGTGTGGTGTGTGGTGTGTGGTTTTCTTTCCTTCCAACGTACCTCTCATTGACAAATAAACGTGCAAACTTATGTGTGCATAATTTTCTTATGTATGCTTAAGTTTTGTAATTGGATGCTATCTAGTTTTTCATATCTAATAGGGTGTTGTGTCAGTTTTTAT
Gma.2019.1.S1_at	U26457.1	At1g55020	0	Metabolism			CCAAGTTCGAGACCCTTATTGACATTTCAGTGATAGAGATATTGTCAAGGCATGCTTCTGATGAGGTCTACCTTGGCCAAAGGGATAATCCAAATTGGACTACGGATTCAAAGGCATTGGAAGCTTTCAAAAAGTTTGGAAACAAACTGGCAGAAATTGAGGGAAAAATCACACAGAGGAACAATGATCCAAGTCTGAAAAGCCGACATGGGCCAGTTCAGCTTCCATACACATTGCTCCATCGTTCAAGTGAGGAAGGGATGAGTTTCAAAGGAATTCCCAACAGTATCTCCATCTAAAATGTGTGTGTGGTTTGCTTATCTATTGTG
GmaAffx.89259.1.S1_s_at	CK605646	At1g55020	1e-28	Metabolism			AAGTGTGGAGTACTGTTGATAGCAAAGATGTTTGGGATCTTCGACAAGGGGCAAAAGATAAAGGGGACAGTGGTNTTGATGCCAAAGANTGTGTTGGANTTNNAANGCCNTAACCTCNATCGGTAAAGGTGGTGTTATTGACACAGCCACCGGCATCTTAGGCCAAGGCGTCANGCTTAGTTGGTGGAGTAATTGATNNTGCCACTTCCTTCTTAGGCNGTAATATCTCCATGCAATTGATCAGTGCTACTCAGACTGATGGCAGTGGAAATGGGAAAGTTGGAAAAGAAGTCTATTTGGAAAAACATCTTCCGACCTTGCCAACGTTGGGAGCAAGGCAGGATGCGTTCAGTATTTTCTTTGAATGGGATGCTAGTTTTGGAATTCCAGGAGCATTTT…
GmaAffx.89726.1.A1_s_at	CK605851	At1g55020	0.007	Metabolism			AAGGCAATCAATCAATCTTCTGAGAGTGTTTGGTTGAAAGTAGCAAAGATGTTTCCTTTCGGGCAAAAGGGTCAAAAGATAAAGGGGACTATGGTGGTTATGCAGAAGAATGTGTTGGATATCAACAGCATCACCAGTGTTGGAGGGATCGTTGACCAAGGCTTAGGCTTCATAGGCAGTGCAGTCGATGCACTTACTTTTGCAGCCACCAAAATCTCCATCCAGTTGA
GmaAffx.90263.1.S1_s_at	CF805988	At1g55020	1e-80	Metabolism			GGAATTTGCTAGAGAGGTGATTGCCGGTGTAAACCCAAATGTGATCCGTCGTCTTCAAGAATTCCCACCAAAGAGCACACTTGATCCCACTCTCTATGGTGATCAAACCAGTACCATAACAAAAGAACAATTGGAGATTAACATGGGAGGGGTCACAGTAGAAGAGGCACTTAGTACTCAGAGATTATTCATATTAGATTACCAAGATGCATTCATCCCATATTTGACGAGGA
GmaAffx.93553.1.S1_s_at	CF809278	At1g55020	3e-42	Metabolism			GAAAAACTAGAAAAGATCCCAACAGTGAGAAGCCGAGCGATTTTGTTTACCTTCCAAGAGATGAAGCATTTGGTCACTTGAAGTCATCAGATTTTCTCGCTTATGGAATCAAATCTGTATCCCAAGATGTCTTGCCTGTCTTGACTGATGCATTCGATGGAAATATTTTGAGCCTTGAGTTTGATAATTTTGCTGAAGTGCACAAACTCTATGAAGGTGGAGTTACACTACCTACAAACTTTCTTAGCAAGATCGCCCCTATACCAGTGATCAAGGAAATTTTTCGAACTGATGGCGAACAGTTCCTCAAGTATCCACCACCTAAAGTGATGCAGGT
GmaAffx.60245.1.S1_at	AW317569	At1g17420	1e-106	Metabolism			GAGGGTGATCCAGAATATGCAAGTTTCNNTGCTGACCCTCAGAAGTATTTNCTGAATGCATTGCCNAGCTTGCTNCANGCCACAAAGTTCATGGCTGTGGTTGACACACTCTCNACTCACTCACCTGATGAGGAGTACTTGGGNGAGAGGCAACANCCTTCNATTTGGTCTGGNGACGCNGAGATNGTNGAGGCGTTCTACGATTTCTCCGCCAAGGTTCNACAGATAGAGAAGGTCATTGATAGCAGGAACCTTGATCGGACTCTAAGGAACCGTTGTGGTGCAGGGGTGTTGCCATATGAGTTGCTTGCTCCTAGCTCTGAACCTGGCGTTACATGCAGAGGGGTGCCCAATAGTGTGTCCACATAACTATACTAAACTAATAAATAAGGGAGTCAC…
Gma.10969.3.S1_x_at	CD396552	At3g22400	1e-119	Metabolism			ATTGGACTTCTGATGCTGGTCCACTAGAGGCCTTCAAGAGGTTTGGAAAGAAGCTTCAAGAGATTGAACAAAAGCTTATACAGAAGAACAAGGACGAGACGTTGAGAAACCGCAGTGGGCCGGCTAAAATGCCTTACACTTTGCTCTATCCTTCTAGTGAGGAGGGATTGACTTTCAGAGGAATTCCCAACAGTATCTCCATCTAGGGGCTCTATGGTTGTTGCAGTACTTTCCCTGGTTTTCAATAAAAGTGAATAGAAGGAATATGATTCCTTCATCTACCTATGTATGGTTAAGTTATGTATTTGGGGTGATTGAATGTTCTCGTGTTTGCTGTTAAGTGTTAATGAAGAAATTCTGTTTGTATAAATTGCTGTTAAGTGTTCTCGCGCATGTTTC…
Gma.2971.1.S1_s_at	CD409358	At4g22220	1e-62	Metabolism	Nitrogen Metabolism		GCAAATGGAGGAAGTTCTGACTATAAAAAATACTGAAATTGCAAAGCATCTTTCACTTCCACCAGTTAAGCTCCACTGCAGCATGCTTGCTGAAGATGCNATCAAAGCNGCCGTTAAAGACTATGAAGCTAAGCGTGCTAAGGCAACTGCTAGCGGAGAGGCAGCAACAGNAGAGAAGCCTGCCANTGCATGATTTCTTTCATNTATANAAAGAATGATGANNNAAACAACCNTTTGTTTGTTTGTNNNTTATTCTNNTAATCAGTTNCTNATNGAAGANCACCTTCACTNGANNNTNNGTTGGACTTAGTTATAGCTAGAGAGTATTCACATCATGCGAAGTAAATATTTGAAATGCCGGCTATGGTTTGTTATCTGCTACTGGGTTTGTAT
Gma.16735.2.S1_at	BI699988	At1g75280	1e-108	Metabolism			AACTATTGCACCCAAGTTGATCAATAAAATCAAAGCATCTTGTTGTGTATGGCTGGAGAATATGTACTGTCTTTCTATTATTTAGTTACTTGTGCTTGTGTTGGCGTCAAAAGAGTTCTTCCTTACTTTACACTGTAANCTGTACTGTTGTTCGCTTAGCTTGNNNNNNNNNNNAAGTTCTTCTAGTATTTATTATGGNTCCGTTGCAATTTGTTCATCACCACTCTGATCCTAGTGGATGTGCGTTGAAACTCAATTGCCAACAAGTATTACAGTGTGATTATCTCGAAGTTCTTAT
Gma.15564.1.S1_at	AF293970.1	At2g22240	0	Metabolism			TATTAAGTATGTGCCTTACGTAGGGGANAGCAAGAGAGCCATGGATGAGTACACTTCAGAGATATTCATGGGTGGAAAGANCACCATTGTTTTGCACAACACATGTGAGGATTCCCTTTTAGCTGCTCCTATTATCTTGGACTTGGTCCTTCTTGCTGAGCTNAGCACTAGAATCNAGTTTAAAGCTGAAAATGAGGGAAAATTCCACTCATTCCACCCAGTTGCTACCATNCTCAGCTANCTNACCAAGGCTCCTCTGGTTCCACCGGGTACACCAGTGGTGAATGCATTGTCAAAGCAGCGTGCAATGCTGGAAAACATAATGAGGGCTTGTGTTGGATTGGCCCCAGAGAATAACATGATT
Gma.6602.1.S1_at	CD415212	At3g02780	1e-121	Metabolism			CACAAGTTGACATAAGTAAGTTCAGAGGAGCTTCCTGCATC
Gma.6602.1.S1_x_at	CD415212	At3g02780	1e-121	Metabolism			TTGGGTCGCATTCTTTACAAGGCACCTTCTGATGGCAAATGGGGAGAGCATGAACTGGACTATCTGCTTTTCATTGTCCGGGATGTTAATGTGAACCCCAATCCTGATGAAGTGGCTGATATCAAATATGTGAACCGTGATCAGTTGAAGGAGCTGTTGAGGAAAGCTGATGCAGGTGAGGAAGGTCTGAAGCTATCACCTTGGTTCAGACTAGTTGTGGACAATTTCTTATTCAAATGGTGGGACCATCTTGAGCAAGGAACTCTTGGGGAGGCCACTGACATGAAGACCATTCACAAGTTGACATAAGTAAGTTCAGAGGAGCTTCCTGCATCCCTGTAATGAAGGGTGGCTGCATTCCGACC
Gma.7251.2.S1_a_at	AW396102	At5g03290	7e-41	Metabolism			GGTATTGCACTTGCTGAGGCTGTACATGGTTCAGCACCTGATATTGCTGGAAAGAATTTGGCTAATCCAACTGCTTTACTGCTGAGTGGTGTTACAATGTTGCGCCATTTGGACCTCCACGACAAAGCAGAACAGATTCAGAAAGCTNTCCTCANCACGATTGCAGAAGGGAAGTACCGAACAGCTGATCTCGGTGGCAGTTCAAAGACAACTGAATTCACAAAAGCAATCATTGATCATCTTTAAATTTTGGTTGGAGTCAGCAAGAAATTCTTGCTTATGATTTTNGANTTTCAGTCAATTTTCTATCTATTTCCCCAATTAATCGGAAAGAATGGGATTACCTCAGCTTAAAGGAAAACTCACCCATGTTTGTGTGACATTTTACAACCAAAGNCA…
Gma.5674.1.S1_a_at	CA937173	At3g58610	1e-117	Metabolism	Amino Acid Biosynthesis/Metabolism		AATCCTTTCATGCATGCTCGTGGTGTTTCTTTCATGGTTGATAACTGTTCAACCACAGCTAGGTTGGGTTCGAGGAAATGGGCTCCACGATTTGACTACATCCTAACCCAGCAGGCCATGGTGGCTGTGGACAATGGAACTCCTGTTAACAGGGACTTAATCAGCAACTTCCTGTCAGACCCAGTGCACGGAGCCATTAAAGTTTGCGCTGAACTGAGACCCACAGTAGACATTTCTGTGCCACCAGATGCAGACTTTGTTCGTCCGGAGTTGCGTTCTAGCAATTAGAACTTAAAAGCAATTATGGCTTTCACTTCGAATCTTTTTCAGATTTCTCAGAACTGCAGTTATCTTGTTAGTTTGGGTTTTCATGATTGGATGCTAGTGTGTAAGTTGTAT…
GmaAffx.77005.1.S1_at	AW509412	At3g58610	1e-89	Metabolism	Amino Acid Biosynthesis/Metabolism		CTCGATTTCGACACGAAGGTTTTCAAGAAGGAGAAGATTAACCTCGCNGGACACGANGAGTACATCGTAAAAGGAGGCAGGGATTTGTTTCACTTGTTGCCCGATGCTTTCAAGGGNATCAAGCAGATTGGTGTTATCGGTTGGGGATCTCAGGGACCTGCNCAGGCTCAGAATCTACGGGACTCNCTTGCTGAAGCAAAGTCTGATATTGTGGNCAAGATTGGACTCAGGAANGGTTCTCGTTCCTTTGCNGAAGCTCGNGCAGCTGGGTTTTCTGAGGAGAATGGGACTCTANGTGACATATGGGAAACTGTCTCGGGCAGTGATCTTGTGATGCTGTTAATTTCTGATTCCGCGCAGGCTGATAACTATGAGAAGATATTGTCTCACATGAAGCCA…
Gma.9110.1.S1_at	BE658682	At5g09650	1e-106	Metabolism			GTGAGGTTCTCAAGGTCAAACCCTTGGGTGCATTAGCCATGATTGATGAAGGAGAACTTGATTGGAAAATAGTTGCAATTTCATTAGATGATCCGAAGGCGCCATTTGTAAATGATGTTGATGATGTTGAGAAGCATTTTCCAGGAACTCTAACTGCAATTAGGGACTGGTTTAGAGACTACAAGATACCTGATGGAAAACCTGCTAATAAATTTGGACTTGGCAACAAGGCAGCAAATAAGGATTATGCGCTTAAGGTCATCACAGAGACCAATGNAGNCNNNGNANTAAACTTATCAAGAGATCAATTCCTGCAGGAGAGTTGTCACTTGTGTAGAGATGTATTGGGGGAATGTCTATTGTTCATGCCATTGCTTGCATTTTCTACAATTCTATTTA…
Gma.2110.1.S1_x_at	BU548865	At3g53620	1e-105	Metabolism			GAACAAGGAAGTTGCAGTGAACGACTTTCTTCCTGCCTCAGCTGCCTATGAAGCGATCAAGCATTCCATGACCTTATATGCGGAATACGTTGTGGAGAACTTGAGGCGGTAGTGTTGATTCCTGGGTGCTTGGAATTTTGTTTGGTTGTGAAGACATACATTACATGTATTCAAAGGCTGCTATTATAATTACGATTATGACGATAACAAAAGCTTTCTATCCTTGTCGCGTGTGCATTGGTCTCAGGGCTGCAACATGCATATTCTACACATGTGCTTAGTTTTGAGT
Gma.5609.1.S1_at	CA935501	At3g53620	1e-91	Metabolism			ATAAACATTCTGATTTCCGTGCCGTTCTGTTATGGCACTACTGCTGCCTCGGTTCTTGACACAACAGTGTCAAAAACTTTCTGCTTTGGGATGCGGCTGTACTGCTACTCAATAATGAGTTCATTTCTAGTATTGAAGAGNNNNTCCTTTGTTTGGTATTGGAGAAATNGTAACACATGAATNAANTTTCAGTTAAGCAAATTCCTCGAGTTTTATTGTAT
GmaAffx.37797.1.S1_at	BU549753	At1g71920	5e-34	Metabolism	Amino Acid Biosynthesis/Metabolism	Histidine Biosynthesis	ATTGATTATCCCCTAGTACATTATGGTTATTGAAAGTTGTTGTAAGAGTTTGATATAACAGAATTTGGGTCAAGCACTGTGATAAATATACGTATATTGGGAGCAATTACAGGATATTCAAAATACTTAAGTACCCTTGCATGTTTACACATTTATTACATGCTATTATTCTCAACNCANNTGNANNNTNNNNNNNTNNTNNNNANNTANAGAATGTAAAAAATGCTTTGTTGAAAGAAAGAGGGAGACTTTATGACCTTTTGAAAGAAGTTCCATTCCTCCGGCCATTTCCAAGCCATTCTAACTTCATTCTTTGTGAGGTTACATCAGGAAAGGATGCAAAGAAGCTAAAGGAGGACCTAGCACAAATGGGTGTGATGATTCGTCACTATGACAAGA…
Gma.398.2.S1_at	BU925900	At3g22740	2e-90	Metabolism			AGTGCCAAATGCCTTATTAGCTCCCCACATCTTGTCCGAAGGGTTCACCTAGATTACCTCGATGCAGGAGCAAACATAATATTAACAGCATCTTATCAGGCCACTATTCAAGGTTTTGAGGCCAAAGGGTTCTCTAGAGAAGAAGGTGAAACTATGCTTAGAAGAAGTGTGGAGATTGCACGTGAGGCACGAGAAATTTATTATGATAGGTGCACCAAAGATTCTTCTGACTTTATGAGAGATGAAAGATATAGGAAACGTCCCATTTTAATTGCAGCTTCTGTGGGAAGCTATGGAGCGTATTTGGCTGATGGCTCTGAATATGTTGGGGACTATGGTGATGCAGTTACTGTCCA
Gma.18050.2.S1_a_at	AW597684	At5g54080	3e-45	Metabolism			GGCTGATGGATTTCTTCCCGGTGGTGCAAGTCTCCATAATTGTATGACTCCCCATGGTCCTGATACAAAGTCATATGAGGCTACCATTGCACGAGGAAATGATGGAGGACCTTGTAAGATCACGGACACAATGGCTTTTATGTTTGAATCGAGTTTGATACCCCGTATCAGTCAATGGGCCCTGGAATCACCGTTCTTGGATCAAGATTATTACCAATGTTGGATTGGCCTGAAATCTCATTT
Gma.2794.1.S1_at	AI959914	At1g77420	6e-31	Metabolism			TTTGATGAAAAACCAGTCCCTGAAAATTTGCACTCTAAAACAAACTAATTGTTAGAGTTGATTCTTTCCTTTATAGGCTGGTTACAATGTTATTTCTTATGATCATCCAACACGATTGAAAACTGGCATGGAGCTTTTAAGTGCTACTCAAGAAATCGAGTCACAATTACACAAGGTTTCTGCTCCATTATTGATTCTCCATGGAGCAGCAGATCAGGTGACAGATCCATTAGTGAGCCAATTTCTTTATGAGAAAGCTTCTAGTAAAGATAAGACACTAAAGATCTATGAAGGAAGTTACCACGGCATTTTGGAAGGGGAACCTGATGACAGAATTTTTGCTGTGCACAATGACATCATCTCATGGCTTGATTTTAGGTGCTCACTTAAATGAGGTTC…
GmaAffx.90936.1.A1_s_at	CF806661	At4g24160	7e-71	Metabolism			TACAAGTGCTAGGTTTGGTACACATTCAACTGGGGAAATACTGACTGAAGAGGAATCAACATTGCTGACAGACTATGTTTACCACACATTGGCGGCCAAAGCTAGTGGAGAGCTGTGCTTAAAATATATTTTTTCATTTGGAGCATTTGCTAGGATGCCCCTTCTTCTCAGTGCCTCAGAGTGGAAGGTGCCCACCACTTTCATGTATGGTTTCCAAGACTGGATGAATTATCAAGGTGCCCAAGAAGCTCGCAAGCATATGAAGGTTCCATGCGAAATCATCAGGATTCCTCAGGGTGGGCACTTTGCGTTCATTGACAACCCAACTGCCTTCCATTCAGCTGTTTTTTATGCTTGTCGAAGGTTTCTTACACCTGATCCAGACAATGAATCTCTTCC…
Gma.6651.1.S1_at	BQ629334	At3g10850	7e-19	Metabolism			AAGCTGGCCAAGCAACAATTCCCTCAACCATTGAGGATGAGTTGGAGACCAATCCCTTTATGAGGGTTGATCTACCTGAGATCCAGGAGAGGGTGGGCTGCAAGTCACCTGTTGAAGCATTAGGAGAGATAAGGAAGCAGAAAGACAATTGGAGAGGCTAATGAAACTAGCATTCTCATTTGTTGATATTTCATTTTCCTTTTCTGTTTTATTCATATGAATAAGGCCTTTATGTAGATACTGTAACAATATGTTTTGCCTGAAACTTAAATGACAGAGTCAGAGGCTTGTCAANTTAGGGGCATGGGTTGTGATTGGCATTGTCGCCTATATGCATTTTATGTTGGTTTTCCAAATACTAAGATGGTCTATTTCATACATGTCATTTACTTGTGAACT…
Gma.6593.2.S1_at	CF923087	At1g53580	5e-41	Metabolism			GATTTTAACACTGCCCAAGAGTACGTTAATCTATCCAGCTCATGACTACAAAGGATTCACTGTGAGCACTGTTGGAGAGGAGCTGCAAAACAATCCACGCATAACAAAGGATGAGGAAACTTTCAAGAACATCATGGGAAATCTTAACCTGTCATATCCTAAAATGATTGACATAGCTGTCCCAGCTAATATGGTTTGCGGAATCCAATCCAATCCAAAGCAAGCTGAGGCTTCATAAGCCTTATCTGAGAGTCACACACTGATGTTATTTGACACAAAGACCTTGCAAGCAAAAGGGGGAAAAATTGTTATAGCCCTTTGAATTGAAGAGAAAAATGGAAATTGTAAATAAATAAAATGGTATTTGTGTTGTGGCCCAAT
Gma.10695.1.S1_at	CD394954	At4g11820	2e-58	Metabolism	Lipid Biosynthesis/Metabolism		CAGTCAACATCCGTTTAGCTTGTCAAACANTGNCTAGAGTGATGNATGTCGATGGAAAATTGAAGTCAAGACATGAGTTTCCCCCNGNAGGAGTTTGTTGAAAACNTGAAGNTAATGGAGCATAGNTATGGTGNNAAGGAATTTGTGACAAGCAAGGACANTAGCCTTTTATCTCCNGGCACATTCTANCTCACTGAAGTTGACTCCATGTATCGGAGATTCTATTCAAAGAAAACTAAAGANAGCAGTTTGACTCNCGCTGAGAACGGTGTGATTGCTAATGGCGTTGCTAATGGCNNNNNNNNNNNNCACTGATGTTGAGCATGTACAATCAGCAGTCAACTTCGCCTAGAATGAGGAAGGGTATTGTTATTTGCGAAGTTCTGTTGGTAAATTGTT…
Gma.1248.1.S1_s_at	AJ518837.1	At2g32150	2e-86	Metabolism			AAAGGAGCTGACTATGCTGTGGAGAGTGTGCATAACTTGGCACAAGTGATCCCAGAGATATGGGCAAACGAAATGGACGGTGGTGATCCAACGATGACACGTTCGAAGAGTGAATTGGAGGCCGTACTCGCTTGTGCTCTGGTTGGAGCTTGAAAATTGACGTTGTACAAAAATGTACATTCCCAACCAACCCAACTATCTATGCAATTAAAAATAATAGTACAGTAGTATAAATAGTATCAGACCACCAATAGCGAAGACAATAACAGTAAGTAACGTGGACCCCCTAAGCAATTATTTGCGACATGTGAATATTGTAAG
Gma.9828.1.S1_at	AF529301.1	At2g32150	3e-83	Metabolism			CAGACTATGCAGTGGAGTGTGTGAATGACTTGGCACAAGTGATCCCAGAGATATGGGCAAACGAAATGGACGGTGAGGATCAAACGATGACACGTACCAAGAGTGAATTGGAGGCCGTACTCGCGTGTGCTGTGGTTGGAGCTTGAAAAGTGTTTGGATGTGGAGGAGGATAAGGCCTGACGTTGTACAATGTACATTCCCAAACCAACCCAACTATCTAAGCAATTAAAATAATAGCAGCAAGTACTATCAGAACACCAACAACCAAGACAATAACAATAAGTAACATGGGCCCCTA
GmaAffx.18444.1.S1_at	BI469783	At4g11570	0.0001	Metabolism			CTTGCAGACATTGAAATGACTGAATTTGGGTCTGTGGAGCCTGAGATGGAGCTGGAGGTGGAAAAAGATTATGGCTCATCATCAGTTGATGACAATTTCTGGTAAATCCTATAATGTACAGTTGATTGAACCTCATCTGATTGTTGATGATATTAGTTACAGGTTAGTTACTTGTGTATATGGTAATCAGAATAAATGGGGTGATAAAATGATAAGTGGTATGCATTGAACATTGATGTTACTACTAATGCATTTTCT
Gma.5606.1.S1_at	BI971017	At5g02230	5e-99	Metabolism			TTGTAATGGTTCAGGCACCTCTCAAATCTTTGACATNATAGGGCATTTTGCTCAGCNCAATCCCNGTGCAGTCNTGCCAAAGACACCAATTGTTTGCAAGCCATCAGAAAATGCCATTGAANTGGCCNTCAANATAGCCAANCTTAACCCACANAGAACTTTGTTCTTNGAGGACAGTACCCGCAACATACAAGCTGGAAAACGTGTGGGGCTTCACACTGTGCTGGTTGGTACATCACAAAGATGTAAAGGNGCAGATTATGCNTTGGAAAGCATTCACAACCTTAGGGAGGCTGTGCCTGAACTATGGGAGGCTGATATAAAATCAGAAGNTGCATACCCTGGAAAGCTAGCTGTGGAGACA
GmaAffx.31256.1.S1_at	BF009765	At1g63660	8e-51	Metabolism	Purine Base Biosynthesis		TCTCGATTACGGTTCCCAATACACCCACCTCATCACTCGCCGCATCCGCAGCCTCTCGGTGTTCTCCCTATGCATCTCCGGCACCTCCTCTCTTTCAACCATCACCGACCTCAACCCCTCCGTCGTCATTCTCTCCGGGGGCCCCCACTCCGTCCACACCCCGGACTCCCCCTCCTTCCCCGACGGCTTCCTCCAGTGGGCCCATTCCAATGGCGTCACCGTCCTCGGCATCTGCTACGGCCTCCAGCTCCTCGTTCAGCGCCTCGGCGGCGACGTCCGCGTCGGAGACAAGCAGGAGTATGGCCGCATGGAAATCTGCGCTGACAAACCCTC
Gma.540.1.S1_s_at	AW598718	At2g26670	2e-96	Metabolism			ATGCTGAATTCAGAAACACTGGATTGGAAAGGTCTGCAAGTTTGGTAGAAGATTTGGATTGGTTCAAGGAGCAAGGTTATACCATTCCTGAACCTTCATCTCCTGGTCTTACCTATGCACAATATCTTAAGGAGTTATCTGTGAAGGATCCTCAAGCATTCATTTGCCACTTTTACAACATCTACTTTGCTCATTCAGCTGGTGGTCGAATGATTGGGAAAAA
Gma.8509.1.S1_x_at	AF320024.1	At2g26670	1e-101	Metabolism			GGTTATACCATTCCTGAACCTTCTTCTCCTGGTCTTACCTATGCACAATATCTTAAGGAGTTATCTGTGAAGGATCCCCAAGCATTCATTTGCCATTTTTACAATATCTACTTTGCTCATTCAGCTGGTGGTCGAATGATTGGGAAAAAGGTTGCTGAAAAGTTACTTAACAACAAGGCGTTGGAGTTCTACAAATGGGATGATGACCTTCCACGATTGTTGCAGAATGTGAGAGACAAGTTGAATAAAGTTGCTGAACCTTGGAGTCGGGAAGAAAAGGACCACTGTCTGGAAGAAACAGAAAAATCATTCAAGCTCTCTGGAGAGATTCTCCGTTTGATTTTATCATGATAATAGATGCCCTGCTATCTGTGTAATTATGGGTATTAAAGTGCATGG…
Gma.3133.1.S1_at	AJ272035.1	At5g27380	1e-147	Metabolism			GATGAGTTGAGGGAAACCCTCCTTAAANTTACAGGAAGCAGGTTCTGAAGAAGATGCAGNCATACATCCTTATGCAGAGGATATTTCCNGCCACTTCTCCAGCAATTTTGGTGCGTGATGGTAATTGGGATANGGGTCATGTCATTTCAGAAGCTGGANTATTTGGTACTTATTTAAGGAATAAGGANAAGNTTATCATTAATAACGAAAGTGGCTATATGGTGCGTACAAAAATATCATCATCTTATGAAGGNGGAGTTTTGCCTGGTTTTGGAGTGGTAGATACTGTATACCTAACTTGATGGAGCTAACCCCCCAAGTTATCAAAGCAATTCAAAACATTATGTATGGTTTATATATCACCACTCAAGTCTCCTCACTCCTGATTTTCTTTGTATG…
Gma.16930.1.S1_at	CD400862	At4g13930	0	Metabolism			TTTGGTGATAGCAGTGCCTTGGCCCCNGGTGGAGTGCGAATTGGNGCCCCTGCCATGACTTCTAGGGGTTTGGTTGAAAANGACTTTGAGCAGATTGGTGAGTTCCTTCACCGTGCTGTGACTCTCACACTGGAGATCCAGAAGGAGCATGGCAAACTTCTCAAGGATTTCAACAAGGGNCTCGTCAACAACAAGGCNATTGAAGATCTCAAAGCTGATGTTGAGAAGTTCTCTGCCNNNTTTGACATGCCTGGCTTCCTGGTATCTGAAATGAAGTACAAGGATTAGGTTCAANCATANCNCTNTCTACTNAATTGTGTCACTCAANGTTCGNCACAAAGNGCAGAAATGGAGAAAAAGGAAATANGTGTCTTCCTTTCCTGGGAGTGATAGGGTTTA…
Gma.4108.1.S1_a_at	BI701465	At4g32520	7e-60	Metabolism	Amino Acid Biosynthesis/Metabolism		GCGATTAATTGAGCATGGATATAAACTGGTTTCTGGNNGNNGTGACAATCACCTGGTTCTTGTCGATCTAAGGCCATCTGGTCTTGATGGTG
Gma.574.2.S1_at	CD486754	At5g26780	0	Metabolism	Amino Acid Biosynthesis/Metabolism		AGTGAAAGGCGACAGATGGAACTTCTTCTGGAGTATTATTTGGAAGCTTTTGGAATTAATAACAACACGTTGCTCAATGGATAGTACCGGAGTCTTGGATGAAAATGAGAATGATATTATCAATGGTTTAAATGAAAGAGAAAAGGGAGAAATTTCCCTTCAGCTTTTCAAATATATTATTNGATTTCATNGGTGAAAATTCCTTGTGATCGTACTGCTGATGTAGCAAAAAGGAGGTCGAGCATGTGGATTTTGCTATNTTGGTGAATTTGTACTAGTATTNTGAAATAAATTACCTTAATTCCTCCTCAATTTACAAACCCCATCTCTCTA
Gma.2113.1.S1_at	BM519739	At3g25140	0	Metabolism			TACTACGCAACAACAAAGCCACTGGANAAGTCATGGCATGTTCTGGGACTTGGCTATAACCCAAGCATCAGCATGGATGAGATTAACAATGCAGCAGTNGTGCACTTCAATGGCAANATGAAACCATGGCTNGACATTGCAATGNCTCAGTTCAAGCCACTTTGGACAAAGTATGTTGACTATGAATTAGATTTCGTTCAGGCCTGCAATTTTGGTATCTAAATGGTCAAGTTTCTTCTCACATGGTGATGCTGTGTTAGGTGCCACAGCAGTTTATTTGCTGTTTAGTTTTGATACATAATGCTTATACGTTTAACAGAGTTCCTAGCTGGTGCNAGGAAAAAATCTTGCTTCTTTCAATTGTAAAATAATACTTTAGTANAGNTATTCTCNNATGTC…
Gma.9286.1.S1_s_at	CA803163	At3g62660	7e-10	Metabolism	Carbohydrate Biosynthesis/Metabolism		GGACACGCTCACTGATTAGCCTTTGCCTTCTCCCTGCTCGCCGGTAAATTCCCTTCTCTGTCACTTCTGTTCATTTAATTTAATTCTCATTCCGCCCAATTTTTATTTTTTCTTATTATTTTCTTCCCTCTTCTCTTCTCTTTACTATCAACAGACAGATCAGATATTTTACTTCACCCATTTTTATTAGTCTTCGTTACCCAGGCCATTTGTATTCTACAGTATCTTCTATTTTGTGCTTCGTGC
GmaAffx.18415.1.S1_at	BI426447	At4g02130	2e-41	Metabolism	Carbohydrate Biosynthesis/Metabolism		CATTGGTCTGGTAGTGGGAAGCCATGGATCCGTTTAAGTTCCAAACGCCCCTGTCCTCTGGATTCTCTATGGGCTCCCTTTGATTTGTATGCACACTCTTCCTCTTAAACTAATTCTTCCCTCTCATTTAATTCAATTTCTCTTTGCTTGTCATTTTTCGCTAGTTAGAT
Gma.10876.1.S1_at	CD391960	At5g22740	0	Metabolism			CAGACCTTAACATTCTCAATTGTAGGATTTGGCTACGTTGGCACCATCGTGTAAACCTCNTTGAGCCAAATTTCTCAAGTTACTTAAGTTTCANCAATGTTGTGTCCATATTTTTCTAGTTTCTCCTAAAAAAAANTACATCAANNGAGGCTGATTTCTTCAAGCAACAAACNCNGTACCAAANTCATCTACAGCTAGTTTAGCTCAAATNATTTTCAATTCGGAAAGAAAAAANNNGTCCTTTCCAANATTTCATTGNCATCCATCATCAAGAAGATACAAATCATCACAGNCAAAGTGCTGTTATTACTAGAATTGCATTANACAGGCTTAAGNGCAGCTATGAAGANGTACCNAAAANNNAAAGTGGTTAAATTAGAGCCTTAGANATNAAGTAGA…
Gma.15392.1.A1_at	CD416483	At4g17770	1e-36	Metabolism	Trehalose Biosynthesis		AATGCAAAGGCAACCCTATCTCCAGTTGCTGAAGTGTTTCCATGCACTGTTGGCCAGAAACCTAGCAAGGCAAAGTATTATTTGGAAGACACAAGTGAGATTTTGAGAATGTTGCAAGGCCTTGCCAATGCTTCTGAGCACTCTACTAGAACTTCTTNNNAACCAGCTTCTCATTAAGGTTCTTTTTAATGTGTAGAGTGCAAACACACACACACACAATTTGGCTACAATGTAGTACTATTTTTCTATACTATACTGGGATATCTATCTTGTGTTAGATTTCGTGATCTATTTTATTTTCTGGCTGACTTGCCTTCATTTATTGATATCCCAACTATGTTGCAACTATCAATAGGTTGTTTTGAAAGTAGATGAATTACATGGGGTACTGTATTTATT…
Gma.8147.1.S1_at	BG507825	At4g17770	2e-22	Metabolism	Trehalose Biosynthesis		AGCTCTTCCCACCATACCAAAAGTGTTTGCTTGCACTGTTGGANNNAAACCAAGTATGGCTGAATACTATTTGGATGATACTAGCGAAGTAATGAAGTTACTTGAAGGACTTGCAACCGCTTCAGCACCATCTGCGTCCATAGCTTCTCAGGAATTGTGAGGAACATTATAGAAACTGACACAGAAAAACAATCTTGTACAGAATGATACTTTCATAGCTGGATTTTAAAAGGTCTATATTTAGAAATTTACAGATTAGCTGATTCATGTTCNNNANAACTTGCAGTAAAAAAATTCTTTTTTTTTTTATGACAAGGATTATGACTTTCTGCACCGTTCAATGAAAACATGCGTAACAGCAATCTTTCAACAAT
Gma.6917.1.S1_at	CD412438	At5g42740	1e-100	Metabolism	Sucrose Biosynthesis		TCCTCACAAGACATTCAGCGGCAATCGACCTTCTCTCAGCCTACTGCTTCCATCATTGAATGCTTATAATATTGGGCAGTTGTTGGCAATCTATGAACACAGAATTGCTGTAGAGGGTTTCATTTGGGGAATCAATTCTTTTGATCAGTGGGGAGTAGAGCTGGGGAAGTCNCTGGCTACTCAAGTCAGAAAGCAACTTAATGCATCTCGTACTAAAGGAGAACCAGTTCAGGGCTTTAATTTCAGTACTACAACAATGTTGACAAGATATCTTCAGGCAAGTTCAGATGTCCCAGCGGATCTGCCAACTGTTTTACCGAAGATCTAAGCACCTTTTTGCAGATTGTTATTTTGATGATTAAGAAGAAAATAATCTGGTCTTGTATAGCATGACCACGG…
Gma.4333.1.S1_at	BI967236	At5g53460	5e-63	Metabolism			AATGTTGCCGGGAGTCCAGACGAACTTATCAAGAAGAAGCAGCAACCAAGGGACACTGTGGCAGTGGCAAACAAACAGTGATTACTTAGGAGCCTTCTGTGGTTTTTCTATTCTTAAAAGATGGAATAATAAAAGATGACTGCTGGAGATTCATTGAGCATTGTTGGTTCGTAGTTGGTGCCCCATATAAATGTAAGGGGGAAAATAATAAAGAAGCGATCTAAGGGTGCAAGGTTAGTGCACAGTAGAAAATTAGGAATGTTCATAGGCTTCGTGATGGAAAGGT
Gma.4375.1.S1_s_at	AF363021.1	At5g37600	3e-40	Metabolism			ACGAAACCGCTGACATCAACACCTTCTTATGGGGAGTTGCAAACCGTGGAGCTTCAGTTAGGGTTGGGAGGGACACAGAGAAAGTAGGGAAGGGATATTTTGAGGACAGAAGGCCAGCTTCTAACATGGACCCATATTTGGTTACTTCCATGATTGCAGACACAACCATTCTGTGGAAGCCATGAGCAAAA
GmaAffx.4537.1.S1_at	BU550013	At1g28480	8e-27	Metabolism			GAGCCATGTGGTAAAGCACTTGCTTCTTGGTCTTGGTGTTAACCCTGCGGTTTATGAGGTGGAGGAGAAAGATGAAGAGGGTGTTGCCAAGCAGNTGGAAGAAACAGTTCGTAGTGATGNNGGNACANCACAACAGGGGAAGGTGCAGTTTCCTGCGGTTTTTATAGGGGGGAAGTTGTTTGGAGGATTGGATAGGATCATGGCTACTCATATCTNNNNNNNGTTGGTTCCTATCCTCAAAAAAGCTGGGGCTTTATGGCTATGATGTCTTCATCTTCCCTTTTTTTTTTTNAATGTACAATAGTTATGCTGAGGTTCAAAACCTATGAACTCGTTCATACTACTTCAATCTCTTGTCACTAGGTCGACTNTGATTTTCTCTTATAAGTCTTTAGTTTT…
GmaAffx.90206.1.S1_s_at	CF805853	At1g28480	1e-29	Metabolism			CATCCCCATAGGAGCACGTGGCATGCCACACGCAGGAGGAATCAAAGAATCCAATGGCACCTATCCATCCAAAGCTGCCACAATGGTATCGGAGAACGCGGTGGTAATCATTGGAAAACGGGGATGCTGCATGTGCCACGTGGTAAAAAGGTTGTTACAAGGTCTGGGAGTGAACCCTCCCGTGTACGAGGTGGACGAGGACCACGAAGCCGCCGTTGCTCTCCACCTGTCCCCGCAGGGCGCCGAAACGGTGCAGTTTCCGGCGGTGTTCCTGGCCGGCAAGTTGTTCGGAGGGTTGGAAAGAGTTATGGCCACTCATATCTCAGGTGAATTGGTTCCCATCTTGAAGGATGCTGGTGCCTTGTGGCTCTGACTCTTACTCTAGCTACCTCCATCTTT…
Gma.4512.2.S1_at	CD409073	At2g30540	2e-38	Metabolism			ATATTTAGAAGATCACAGGGTGCTTGATCAGTGGTGTATCAGGATGGACAAGGTGACGAGGTTGGCTTCTGAAAAGGGTGTGGTGATTTTCACAAAGAGNTCTTGTTGCCTCTGCTATGCAGTNAACATTCTGTTTCAAGAACTTGGNGTGAATCCTGTGGTTCATGAGATTGATCATGACCCTGAAGGCAGAGAAATGGAGAAAGCTCTATTGAGGCNAGGCTGCACTGCTCCAGTNCCAGCTGTNTTCATAGGAGGGAAGCTAANGGGATCCACCAATGAAATCATGTCCCTCCACCTAAGTGGTTCACTCACTCAGATGCTGAAACCTTANCAGGCTTTGTCTTGAAAAGAAGCAC
Gma.1560.1.S1_s_at	BQ298777	At1g78380	3e-74	Metabolism			GAGACACTAACTGACAAACCCTTTTATGGGGATGACACGTTTGGCTTTGTTGATCTTTGTTTGATCACTTTCTCTAGTTGGTTTTATACTTATGAGACATATGGGAACTTCAAAATGGAAGAAGAGTGTCCTAAACTCATGGCTTGGGTCAAGAGATGCATGGAGAGAGAGACTGTGTCCAATACTCTNCCTGATGCTAAGAAGGTGTATGGTCTTATTGTGGAACTGCAGAAGACACTTGAATCGAAATAGAAGATTTCAATAAATCAACCCATTAAATAATATTTTCATGTTAAATATGTTGTTGTAAGGTCTTGTGTACNNNTCCTCTATGGTTGTGTGGGTTGGGTCAGTCATTTATGTGGTTTACTAGACACTAATACATCTTCTCTATTGAAG…
Gma.1917.1.S1_at	AF243365.1	At1g78380	4e-82	Metabolism			CTGATTATGTTGACATTAAGATACATGATCTTGGAAAGAAGATTTGGACATCAAAGGGAGAAGAAAAAGAAGCTGCCAAGAAGGAGTTCATAGAGGCCCTTAAATTGTTGGAGGAACAGCTGGGAGATAAGACTTATTTTGGAGGAGACAATATTGGTTTTGTGGATATAGCACTTGTTCCATTCTACACTTGGTTCAAAGTCTATGAGACTTTTGGCAGCCTCAACATTGAGAATGAGTGCCCCAGGTTTGTTGCTTGGGCCAAGAGGTGCCTACAGAAAGAGAGTGTTGCAAAGTCTCTTCCTGATCAGCACAAGGTCTATGAGTTCGTTGTGGAGATAAGAAAGAAGTTAGTCATCGAGTAGGTTTCATGTTGGATCTTAATAGCCATAGTGAAGT…
GmaAffx.93206.1.S1_x_at	CF808931	At1g78380	1e-65	Metabolism			TGCCTGCAGAAAGACAGTGTTGCCAAGTCTCTTCCTGATCAACACAAGGTCTATGAGTTCATTATGGACATA
Gma.1650.1.S1_at	BM893382	At5g40370	1e-40	Metabolism			GAGATATCGAAGATGGCTCTGCCCAAAGCTAAGGAGATCGTGTCGTCCAATTCCGTCGTCGTTTTCAGCAAAACCTATTGCCCTTTCTGCGTCGATGTGAAGAAGCTCTTCGGTGACCTCGGTGCCAATTACAAGGCCATCGAACTCGACACTGAATCCGATGGAAAAGAGCTCCAAGCAGCATTAGTTGAGTGGACGGACCAGCGAA
Gma.6289.3.S1_a_at	AI437818	At1g12050	1e-31	Metabolism			GGTGTGGTGTCACGGACTAATCTAAAGCACTTATATTGGACATTGACCCAACAACTTGCTCACCATACAATCAACGGTTGCAACCTTAGGCCAGGCGATCTCCTTGGAACTGGGACAGTTAGTGGTCCTGAGCCAGAGTCCCGTGCATGCTTGCTAGAATTAACAT
GmaAffx.42255.1.S1_s_at	BQ612697	At1g12050	3e-30	Metabolism			GGCCGCAGACTCCTGTTCTAGATAACTGGTATCGCCTGCCTGTTGCCTACCATGGACGGGCATCTTCTGTTGTTATTTCCGGAACAGATATTGTCCGGCCAAGAGGTCAAGCTCATCCAGTTGGCAGCTCTACCCCCTACTTTGGCCCTTCATTAAAGCTAGACTTT
Gma.3838.1.S1_at	AW099128	At4g15940	5e-86	Metabolism			CGGCAAAAGGGCTCAACCAAGGACATGATNTTTAAGATCCCATTTCTNATTAGCTACNTNAGCTCTGTCATGACATTGTTTGAAGGNGATGTCATACTAACTGGTACTCCCCCGGGTGTTGGCCCTGTNAAAGAGGGTCAAACAATTACTGCTGGNNTTACAGGCCTTGTGGACGTACAGTTTAATGTTGAAAAAAGAGCTAGGCCTGTTCTTTCTTGATAAAACCCTCCTCGAAGGTACTACAGTTCTACAGAAAATATCTTGCCAAAAGGAAACCAGGGGACACAATAAAAATTCAGTTATATGGACTTNAGAGTCTANNCGATATTTAACAGTTTNTTTTTTTGTAATGGTCGTCGAATCCGTACTATAGATCTTTTGGAGTGCTATTTTAGACTT…
Gma.5637.1.S1_at	AY126715.1	At2g47180	1e-148	Metabolism	Carbohydrate Biosynthesis/Metabolism		TGCTGAACAGGATTTTTTGAACATGTACTTCAAGGACAAATATAGGCCAATTCCTAATGTCTANAATCTTGTGNTGGCCATGCTGTGGCGTCACCCTGAGAACGTTGAGCTTGANAAAGTTAAAGTGGTTCACTACTGTGCTGCTGGNTCTAAGCCTTGGAGGTACACNGGGAAGGAGGANAATATGGAGAGAGAAGATATCAAGATGTTNGTGAAAAAGTGGTGGGATATATATGAGGATGAGACTTTGGACTACAACAATCCACTCAATGTGGATAAGTTCACTGCGGCACTTATGGAGGTTGGTGAAGTCAAGTTCGTCCGTGCCCCATCTGCTGCTTAAGAGTGTCTTTGGAAATCAAGTGTGATCCAAGTACATGTACAAAGTCATACATCATT…
Gma.1824.1.S1_at	BI469795	At5g26030	1e-122	Metabolism			GGAATTGGCTCTTGAATCTGGCATCAAGAATTGGGCACGTGTACCTGCCCTTGGTGTTACCCCTTCCTTCATTACAGATTTAGCAGATGCAGTAATAGAAGCTCTCCCATCAGCAACAGCAATATATGCACCGACCAGAACCTCTGAAGATGTTGATCATGACCCAGTTAGATATTTTATCAAGATGTTCTTTGGTTCAATCTTGGCATTCATCTTGTTCTTGTCACCCAAAATGATCACGGCATTCAGGAATCATGTCATTTAGAAGAATTAAATCCTGCTTGCTGAATTCAATCTGCAAGCATATAGATGAAGCCTATTGATAGCAACAAAGTATACTTTGATTTTTTGTCTTTGTTTTACTTATTTCAACCTCTACTGTATACAGCACAGAGCTAT…
Gma.3120.1.S1_at	BM270077	At1g48910	3e-92	Metabolism			TTAGCAAGGTTGTGTATGGAGATCTGAGTGAGTATGGGATACCGTATCCGAGTGAGGGGCCTTTCACCATGAAGATGAAGTATGCCAAGTTCCCAATCATCGATGTAGGAACTGTCAAGAAAATTAAATCTCGAGAGATACAGGTGTTGCCAGCTGAAATAAAGAGTATAAGAGGTAATGAAGTTNTGTTCCAGGATGGCNAATCGTACACATTCGACTCAATTGTTTTCTGTACAGGCTTCAAGAGATCAACTCAAAAG
GmaAffx.19618.1.A1_at	BU544352	At1g43670	2e-79	Metabolism			TGGTTTTACACTTGATCCTAGCCTTGGGGAGTTCATATTGACTCACCCAAACATCAAGATACCAAGTAAAGGAAAGATTTATTCGGTGAATGAAGGAAATGCCAGAAACTGGGATGAACCAACCACTAAATATGTACAAATGTGCAAGTTTCCTCAGGATGGTTCACCACCAAAGTCTCTTAGGTACATAGGAAGTATGGTTGCTGATATCCATCGAACTTTGCTTTATGGTGGTATCTTCATGTACCCAGCTGATGCAAAGAGTCCAAACGGAAAGCTACGGCTTCTCTATGAAGTCTTTCCAATGTCATACTTGATGGAGCAAGCAGGAGGTCAGGCTTTCACAGGAAAACAACGGGCTCTTGATTTGATTCCAAAAAAAATACATGAACGATCACC…
Gma.5787.1.S1_at	BQ298856	At5g66280	2e-66	Metabolism			AAGCCATGTGGCTGATGCTGCAGCAGGANAAGCCCGATGACTATGTTGTGGCCACNGAAGAGTCCCACACCGTNGAGGAGTTCTTGGAAGTCGCGTTCGGCTATGTGGGACTCAATTGGAGGGACCATGTCGTCATTGACAAGAGNTACTTTCGCCCCTCTGAAGTCGATAACCTCAAAGGGGACGCTTCCAAGGCCAAGAAGGTGCTTGGTTGGAAACCTAAAGTGGGGTTTGAGCAGCTTGTGAAGATGATGGTTGACCGGGACATTGAGATGGCTAAGAAAGAGAAGGTTCTTGTTGATGCTGGCTACATTGATGCTCAGCAACAACCTTGAATCTCATCTGCAACTTGAGGAAGAGGGGNTTTTGCTGTTTTGATCATATAATGCCGTTGACATA…
Gma.1738.1.S1_at	AW278755	At2g39770	1e-170	Metabolism	Colanic Acid Biosynthesis		GGTCCTGGCTGCGTTATTGAGCAAGGTGTTAGACTCAAAAGCTGCACAATAATGCGTGGAGTCCGAGTTAAGAAGCATGCTTGTGTATCCAGCAGTATTGTTGGGTGGCATTCAACTGTTGGGCAATGGGCTCGAGTGGATAATATGACCATCCTTGGAGAAGATGTCCATGTATGTGATGAAATTTACAGCAATGGTGGTGTTGTTTTGCCGCACAAGGAGATCAAGTCAAATATTCTGAAGCCGGAGATTGTCATGTGAGTGAGGTCAATGATGTTCAAATTGGTACCATGTGGTGAGGAGGTAGAAAAATTATTGAGTCTGGAATATGTTTGTCCGTTTCATTTGGTTTTCCTTTTTACTTCATGGCATTTCTTTCCTTTCTATAAGTCAGTTTTT…
Gma.2451.1.S1_at	AW100972	At1g78680	1e-122	Metabolism			GTTTATGTTTCCACTGTACGTTCTCNAAACTATCCTGTGACTGGCTTCCAATGGCATCCAGAGAAAAATGCCTTTGAATGGGGTTCACCAAGAATTCCACACACGGAGGATGCCATTCAGATAACCCAGTATGTTGCAAATTTTTTGGTCAGTGAAGCTAGGAAATCCTTAAACAGACCAGTTGCTCAAGAGTTGCTAGACAATCTCATTTACAATTACAGTCCAACTTATTGNGGGAAGGCTGGGAAAGGATATGATGAAGTTTATATATTTGCGCAAGCCTGAGAATGCTGGAGAAATCAGCCAAGAATTGTATTGTGCATAGTAATTACCATGAATGTTGTTGTATGCACTAGTAATATCATTGTTATGATGCACAATAATGAGAGCAAGATGCTT…
Gma.1314.1.S1_at	U63726.1	At1g78660	1e-101	Metabolism			GTCCTGCACAATCATCGTTATGCCATATCCCCACGCAAGCTTCAATATAATACCAAGTTATCTGACTTTTTTGAGATTCTGGCAACATCTGAGGATAGAGATGGAAAGACTTTCGTTTCCACAGCACGTGGTAGGAAATATCCCGTGACTGTCAACCTATGGCAACCAGAGAAAAATGCTTTTGAATGGGCTACATCTTTGAAAGCCCCTCACACAGAGGATGCAATTCGGGTTACTCAGTCCACAGCAAACTTTTTCATAAGTGAAGCTAGGAAATCCACAAACACACCTGATGCTCAAAAAGTGCGAGATAATCTCATCTACAATTACAAACCTACTTTTGGTGGAACGGCTGGGAAAGGATATGATCAAGTGTATCTCTTTGAATAATTCTATCTG…
Gma.2319.1.S1_at	AW349967	At4g34510	4e-16	Metabolism			AACAGTGCGGTTTGGCAGGCTCTGAGNAATGTGAGGCCTTCTCCTAATGGACCATGGGAAGATTGCATTCATAAGTATCCTGTGGAAATAGTCACATAGTGATCATAGTTCAGTTCAGTTCTCAGTCACATACTCTGGCTGCTACAACTTAATTCAGGGTACCCTTCATTAGTTTCCAGATCCATTGTCTCTCTCTCTGTTGTAGATTTCATTGTGTAATTCACTGCCTCTTTTGTGTTTGATGATTGTGGATTTTCATTGGGTTAAATTCATGTATCTGGAGTAATATGATANGGGGAATTCCTGAATTTTTTTTCTTCCTGCTGATGCACTTATGAATTTTTATTTTTTTAGTCATAAAGTTGCGCCTGGGTAACGAGGCGCTTATAGGCCCCGATG…
Gma.7286.1.S1_at	AW310642	At3g06860	1e-165	Metabolism			CAAAGCAGCAGATCTTGATATTTCTGCTATCATGGGCATGGGTTTTCCCCCTTACAGGGGAGGCATCATATTCTGGGCTGATTCTCTTGGATCCAAGTACATATATTCAAGATTNGAGAAATGGTCAGAGTTGTATGGGGAATTCTTCAAGCCTTGTGCCNACTTGGCTGCAAGAGCTGCCAAAGGAATTCCTCTGAGTGCCTCTNTGGAGCAGNNGGNAANGTCTCGCATGTAAGAAAAAAANAGCTCATTACGTGTTTACTGGATTGAATTTTCCTTTCCCCGTTATATCTCCTTTCAGATGGTAGGAANATANTGGTGACTNNNNTGAGAAATAGCNTTATAATGTACGATGAGAAAACATTTGAACAGCATAATTATTTAAAAAATAAAAGTATT…
Gma.3537.1.S1_at	AY004240.1	At5g64460	1e-108	Metabolism			TTCTGTTTCATTCTCTAAGTGCTTTTGGAAATGATTGTCATCCAAACGNGAANAATGAAATCTGCACACACTTTGCTAACTGTGAGCTACGTTCAATGGTTATCATTGACAGAGGTATGATTGGTTCANATGAGTCCTCTACCAACTATCCTGGCAAAGTTCCAGATGGCCTTGACCTTCCTAGTGACGTTGCTGACCAGAAGCATCCAGAGAATGGGCAGGCAAACTGATAGTGGAATTTTCTTCATTTTTATGATTTCCTAATTACATTTATGATACCAACTACGATTACTTTTAAGCATTAATTAAATGGACATCAATTTCATGTGTGAANNNNNNANNNTACGTTATTTCTTATTCAAGGTTATTGGCTTGTGTAGCTAT
GmaAffx.90450.1.S1_at	CF805871	At4g24380	4e-56	Metabolism			GAAGCAAATTTAGAGATCCCAGCATATGCGATGTTGCCTACAAAGACCCCATCAAAGCTAAATCTGTTCACTTCATTGGGGAAAAAGATTGGCTGAAACTGCCTTCAGAGGATCTAGCGTCTGCATTTGACAAACCCTTCATAATAAGGCATCCCCAAGGTCACACCGTCCCACGATTAGATGAAGTGGCTATCAGTCAATTGAGAAAATGGATTACAGAAGAAGTCCTTTGTCAACCAAAAGTTGAGGTCTCAGTTTGTGAGCGTGAAACAGACCATGAAGAAAAGATGTCAGAGAAGACGACCAAGATAGAACCATGCGGTACCAATCA
GmaAffx.24756.2.S1_at	BI316523	At5g02310	2e-89	Metabolism			TAAACTTGGGTCCTGTCGGAGAATCTACCTACTGGTCATGGCTGTACAGATTCTACTGATGCTGACATAGCTGCAAGCTTTCTTCTGCTCCATGCCTTTCCATAAAGTAGGTGCACATGTGTACATATATCATCATACTAGTGAGAGGAGCAATTGCTTCAAGGTATAGTTTGTGGAATTATGGGCTTATCAGTGGTTTAGGATGTCTGAAGACAATAATGTTGGTTCTGTATCCCTTCCTCTCCGTTTCTTTTTAGTTGGGCCATCCCCTCTACCCAGGTAGAGGAAGCAGGATAATTCCCTTGGGCATATTGTATACAAGGTATATATACATACTGATTTTTACTGTCAATATATGTTTGCTTTTTAGTATATTTCAGCAACAATGCTAATAGACTA…
Gma.10794.1.S1_at	BU577866	At5g66680	1e-157	Metabolism			GATAATTTGGAATACTCTGTTGAAGTTTATGAGTGGTCTGGGACANCATGGGAACCTTANGTAGCTGATGATGTTCAAGTGCAATTTTACATGATGAGCCCCTATGTCTTGAAGACTTTATCAACTGANGGCAAGGGCCNTTATTTCACATCATTTAAGGTTCCAGATGTCTATGGGGTTTTCCAATTCAAAGTTGAGTACGAAAAACTTGGATATACAAGCTTATCTTTATCAAAGCAGATTCCTGTTCGTCCCTTTAGACACAATGAATATGAAAGATTTATACCAGCAGCNTATCCCTATTATGGAGCANCATTTTCAATGATGGNNGGNTTCTTCATCTTCACNGCAGTTCATCTATACAGCAAGTAGA
GmaAffx.713.1.S1_at	BI968242	At5g19290	2e-62	Metabolism			AGCTGCTTCGGATCTGCCGGGAGCTTCAGGGGAGGTACGAGGAGGTGGAGGTGCCGCTGCTGGTGGCGCACGGCGGCGACGACGTGGTGTGCGACCCCGCGTGCGTGGAGGAGTTGCACGCACGCGCCGCGAGTAAGGATAAGACGCTGAAGATATATCCCNGGATGTGGCATCAGATGGTTGGGGAACCCGAAGAGAACGTGGAGCTAGTGTTTGGGGACATGTTGGAGTGGCTTCGTACACGCGCTCAACGCGCCCCCGAGCACGGTGTTGCTTAGGGTCAACTCTTTTACTTTATATTATAATAATAATAATAATAATAATATTATAATAGTGTTGGTTGGGCCAGGTTGGCTTGTGCTCTGATAAGATATTATTGTTTATTCCTATAAATTGTTA…
Gma.2069.1.S1_at	CD414638	At2g38670	1e-134	Metabolism			TGCTCGAAAGCCCAAAAGATATTACTACTGCCACAGTAGCCCAAAGGATAATGGCTAATCATGAAGCTTATGTGAAACGCAATGCTAAGAAAACTAGGAGTGAGCAGAGATACTANGAAGAGAAAAAATACGTCTCTGGAGACTAGAGTGTATATAATGATCTTTTACATTAGTTNGGTACTGCTCTTCAAGNTTGACCCTGTCACAGAGATGCNACCNNTATAGTATNNNNNGAATCTANACACNCTTTGTGAAGGACATNTNGTNCAGGGTATGTATAACATAGGAGTGGNNATAACTCNGGAATACCGATGTACTTTAATGTCCTGANGTTTTANTTNTGTNNTCTGAAAGGCAACCATGTGGTTTGCTCACCAGTTTTATGCCATTTGGTTTTTG…
Gma.4624.1.S1_s_at	CF921137	At2g43900	0.0003	Metabolism			GAACTCAAGTCAAGCGTTACCAAGAACAATGATTTTGAACCGAGACCAAGTGCTACCAAATATGATGATTTTGAACTCAGGTCAAGCGTTACCGAGAATGATGATTTTGAACCGAGACCAAATATTAGCAAGTATGATGACTTTGAACTCAGGTCAAGCGTTACCGAGAATGATGATTTTGAATCGAGACCAAGTGTTACCAAATATGATGATTTAGAACTCAAATCAAGCATTACCAAAAACGATGATTTTGAACCGAGACCAAATATTAGCAAGTATGATGACTTTGCATCCAGGTCAAATACCAAGTACGATTCTGAACCTAAAGCAAGTGCTACCAAGTATAGTGATTAAATGAAAATCAAGTAATTGTATAATACAGTCGAAGAAAATCGTGCT…
Gma.4125.1.S1_at	BM567768	At3g58580	1e-122	Metabolism			TTTAGCAGTTGACCCGCTTAACATTCTACGTCCTCACAGCAAGTTGGTTCATCAGTTACCACTGGTNAGTGCATACNCATCTTTTGCNAGAACAGTTGGCCTTGGATATGAGCAGCATAAAAGGAGANTGGATGGTGGAACNAATGAACCTTTATTCACAAATGTCACTAGAGATTTTATTGGCACTCTAGATTACATATTTTACACAGCGGATTCATTGGTTGTGGAGTCATTATTGGAGTTNCTGGATGAGGAGAGTTTGAGGAAGGACACAGCACTTCCTTCACCTGAATGGTCCTCAGATCACATNGCTCTCTTAGCNGANTTTCGCTGCTGCAAGAATAAATCTAGGCGTTGACAGTTAAGGTCACTTTCAGTGATACATAANNAAAAANNNNN…
GmaAffx.84342.2.S1_at	CA802789	At4g13360	3e-57	Metabolism			AAACTGAGTATCGTATTGCCTTGAGGTCTTCACTACGACATGATTTTTCAGAAGGTGTCCGAGCAGTGCTGGTGGCCAAGGATCAGAACCCAAAATGGAAACCATCAAGCTTGGAGGAANTTGATCCGAGTGAAGTGGAAGCCGTCTTTAAACCTTTAGGACCNGAAGTTGGGGAGTTGAGAGTGTAATTTTNGANGGAAAATGTNNTNTTCTCATTTCTTCAAATGCATTANAGAATTGTAAGCACTGCATAAAATAAATAGATGGTGTTTTCATTAGGTCTGGCATCCAGTCCAGGTCCAGCGTGTNGCTAGCACTGTTCACCATATAATAACATGAGGTCCACGTTTTTGGAAAGGTCAAATGATCTTGTTGCTTCCATTATACCCATTTGGAAGA…
GmaAffx.92649.1.S1_at	CF808374	At2g23620	2e-80	Metabolism			TGGTCACAGCCTTGGAGGGCTGAACATAGCACTTGCAATGGAGAAATTCCCAGAAAAGGTAGCAGTTGGTGTTTTCTTAACAGCTTTTGCTCCAGACACTGAACACCACCCATCTTATGTCTTGGAAAAGTACAATGAGAGGACCCCGTTAGCTGCATGGTTAGACACTGAATTTGCTCCAAGCGGAAACAAAACATCAATGTTCTTCGGCCCCAACTTCTTGTCCGACAAGCTCTACCAACTGTCCCCTATTGAGGACTTGGAATTGGCCAAGACTTTAGCAAGG
Gma.1559.1.S1_at	CD394386	At1g69230	1e-06	Metabolism			AAGAGCATGGGTCGTGGAGTTAGCAGTGGTGGTGGTCAAAGTTCNTTGGGTTATCTTTTTGGCAGTGGAGAGGCCCCTGCCNCAAAACCNGCAACAAANAATGCCCCAGCCCAACCTGAAGTGCAGGCTGTAAATAATGNGCCTCCTNCAAAAGCATCTCCTCCTACTAAAACAATAGACCCTAACAAGGCTGCTGGTATNAACAGTCATTCTACTGATGGCCAGAACACCGGCAACTTCATCACGGACCGACCCTCAACCAAGGTCCATGCTGCCCCTGGTGGTGGTTCTTCNCTNGNGTTATCTCTTTGGTGNACCTGGNGAGGGGAAATGATACCTTGNTTGCAAAGCTTTTGCTCGATGANNNANGATTTATTTTGNAAATTCAGGTCGTGGAAA…
GmaAffx.88740.1.S1_s_at	CK605984	At1g69230	4e-28	Metabolism			GTGGTGGTCAGAGTTCCTTAGGTTATCTCTTTGGCAGTGGGGTGCCTGCCAGCAGTGCAAACAGTCAGCCTGCAAATGGTGCTCGCACTCAAAATGCTAGTGCTCCTTCACCACCAGTCGATAAGCAAAGTCCAGCACCAGCACCAGCACCGGCACCTGCATCATCACCAATTGATAAGCAAATTCCAGCTGGAATTCCTGGAAGTCTTAAAAACAATTACCATCGTGCTGATGGGCAAAACTGTGGCAACTTTCTTACTGATCGGCCATCTACCAAGGTTCATGCTGCCCCAGGTGGCGGATCTTCCTTGAATTACCTCTTTGGTGGTCCTCCAGGGAACTAATTCATCATTGTGATTCAAACCTACCATGTGATGTATCATGTGTAAAATAGATAGC…
GmaAffx.62534.1.S1_at	BE022927	At1g47480	9e-07	Metabolism			GAATGGTGAGGATCATGTTTATCATATCTTCCATCCGGAATCTGAGAATGCCACGAAGTTGATCAAACGCTTGGGTTTGTTTCTGAATGAGTAGAATAAATGTCTTTGCTTGATTTCTCCTGTTGTGTTGTGTGAGAATATGAATAACAACAACCATGGAATGGTTCCTCTGTGATCTGAAAT
GmaAffx.92722.1.S1_at	CF807561	At1g47480	7e-65	Metabolism			CTCGAAGCCAATTGGGTCGGAGGCTGTTGAGGGGCACGAGCAGAGTTTGGCCATGAAGGTCTGGAACTTTGCCTGCCCTGATGCCCCCGGTGGAATCGATAACCCCTGGATCAACCCCTGTGTTCCTGGGGCACCCTCTTTGGCCACTCTTGCCTGCTCTAAGTTGCTCGTTACTATCACTGGCAAAGACGAGTTCAGAGACAGAGATATTCTCTACCACCACACCGTTGAGCAAAGTGGCTGGCAAGGTGAACTTCAACTCTTTGATGCTGGCGATGAGGAGCATGCTTTCCAGCTCTTCAAGCCTGAGACTCATCTTGCTAAAGCCATGATCAAACGCTTGGCTTCTTTTCTGGT
Gma.10749.1.S1_at	AW349258	At3g27570	3e-35	Metabolism			GAAAAACAATCACGTTGAAAGCGACAATCTGAGCAGCAAAGAAAACGTGGGTGGTTGTTGCCAGGGTGTTAATGGAGTTTCTTGTTGCAGAAGTGCAAGTCTTGAGCAAAACAAGGAGATTGAAGAAACACCTGAAACACATAAGAAGGGGAGCNAAATCTGTTCGAATTGGCCTCAACTGCAGCAGCGTGATATTCGCACAGCTGTTGGTGTGCTTGGAGCTGTAGCAGTTGTTGTTGTGGCTTACAAACTNTACAGAAGGGCAGCGTAGGTTACTCTCTAAACCATGTTTTTTAGGTTGCTTGGAAGTTTATTACCCAATATTTTTTTTTGTCGAGGTTCAATAAATTTAAGAAACAATCACGAAAACTACTATTACCAAGTCATACATAGACACTT…
GmaAffx.81366.1.S1_at	BU550660	At3g63010	1e-116	Metabolism			TAAAGCTTGACATTTTACTTGGGTTNTCTTTTTTTTTNCNNNNNNNCCCNCACTTTTGTATCNNNNNNNTTNTCTTTTNCTNNNTTGTAGTAAGGTGTGTAGTTATAAGATTGTGTAGCATTACTTGTTATTGTCATAACATCTATGGTGGNCAATTTGAGAGTTCTGTGACCTGNGGACTACTGCTTCNTGTTCNTCTCTGTTTGTGTCTNTTGGAAGGTAGCNCCTANCACCNGCTTNGGCAGTACCAGAACTCGGTTCATTTGGGGGGTTTGGTCGAACCACCGTATACAACGCTTCAGCCCCCCTTTTAACGTTTTGAGGTCAATGGCAGGAGGGGAGATAGAAGATGAGGATTGGTTCATCACTTTGTTTGATTAAGTGAATGGTTTCCTCTTG…
GmaAffx.37677.1.S1_s_at	BE022626	At1g49650	8e-09	Metabolism			TAAGTTGCTCGTTACTATCACTGGCAAAGACGAGTTCAGAGACAGAGATATTCTCTACCACCACACCGTTGAGCAAAGTGGCTGGCAAGGTGAACTTCAACTCTTTGATGCTGGCGATGAGGAGCATGCTTTCCAGCTCTTCAAGCCTGAGACNCANNNNGCNNNNNNCNNNATNNNNCNCNNGGCTTCTTTTCTGGTTTGATGGATGGCTTGTCATGAGAGATTCCAAACATAATAAATCGTGCGTGCCTTCACCTGTCTTGTCTACTACTCCAGTTTTA
Gma.1555.3.S1_at	CD397060	At1g03475	1e-163	Metabolism			CTGACTGCTCGGTGGGAATACGATCATAAACCGGAAGAAGGAAGCGAAGAATGGAAACTCTTGGACGCATGCATCAACCCCAAGGAATGGATCTAATTCATCAGTTGACCCCCCAATTTGTCAGCTTTTTAATTTAATAATAAGGGAGCTTGTTTCTTTTTTCGGTGTATATCAAGTGCTTGTTATGATGAGTCAGAATGTTAGCTTGTTGTACTAGGTGGATTGTAAATCACGTATTTTGCTAGAGTCATCCGCGTAAAGCGTGAAAATGCAGAAAATTACAAATGTCTAGGCTGCGTCTGTAGTATACCTACTGCCAACCATTGTTCTTTCTACAAGTAACTCCTCAATCCCATGTAAGAAAACAAAAGGCAGCTTCTTTAATGCCAGTATTGCACA…
Gma.4374.2.S1_at	BQ454274	At2g45570	2e-65	Metabolism	Cytochrome P450	CYP76C	CTGGAGACTGCCTGATAATGTCAAGAATGAGGATTTGAATATGGATGAGATTTTTGGGCTCTCTACACCTAAGAAAATACCACTGGAAACTGTTGTTGAGCCTAGGCTTCCACACCATCTTTATTCTCTCTGAGCAGTGCCCTTGCACAAAGGGTTTCTCTCTAATAAGATTGCTGTAGGAATAAAATGGGTCTTGTGTGAGCTTATGTTTGTCACACTGGATTGCAATGAATTTTTCTTTCTTNCTCATNNNANNNTTATAAANAATAAAATAAAAATGATGTTGTGGTGTTAGAATAGAGATTGTGGTAACCAATGTAATAGCAAATGTGTTAGTGAAAGTTTGTAGCCATTTTCTCTCTCANANAAATAGGCATCTCTCTCTCTCTCATCAAGATA…
Gma.5578.1.S1_x_at	BE659192	At2g40890	0	Metabolism	Cytochrome P450	CYP98A	GAAGCAATGAGGCTTCACCCACCAACCCCACTAATGCTCCCACACCGTGCCAATGCCAATGTCAAAGTTGGAGGCTATGANATTCCNAAAGGGTCCAATGTGCATGTGAATGTGTGGGCNGTGGCCCGNGACCCGGCNGTGTGGAAGGATCCNTTGGAGTTCCGACCCGANAGGTTCCTTGAGGAGGATGTNGACATGAAGGGCCATGACTTTAGGCTACTTCCATTCGGGNCGGGTCGNCGNGTATGCCCGGGTGCCCAACTTGGTATCAACTTGGNANCATCCATGTTGGGCCACCTCTTGCACCATTTNTGTTGGACCCCACCTGAAGGAATGAAGCCTGAGGAAATTGACATGGGAGAGAATCCAGGGCTAGTCACATACATGAGGACTCCAATA…
Gma.17686.1.S1_at	BF597378	At2g45550	1e-108	Metabolism	Cytochrome P450	CYP76C	ATTTACACCTGAAAGATTCCTGGAAAGTGACATTGATTTTAAAGGCCATGATTTTGAGCTAATACCCTTTGGAGCTGGAAGAAGGATTTGTCCTGGGTTGCCATTAGCATCTAGAACTCTGCATGTTGTGTTGGCATCTCTTCTATACAACTATGATTGGAAGCTCACGGATGGACAAAAGCCAGAAGACATGGATGTATCTGAGAAATATGGAATTACCTTGCATAAGGCACAACCTCTACTAGTTATTCCCATCCAAGCAT
Gma.4374.1.S1_a_at	BM178538	At2g45550	1e-53	Metabolism	Cytochrome P450	CYP76C	CATGACTATGAGCTATTGCCATTTGGTGCTGGGAGA
Gma.4374.1.S1_s_at	BM178538	At2g45550	1e-53	Metabolism	Cytochrome P450	CYP76C	GGCCAATTTGTTGCATGGATTTAACTGGAGATTGCCTGATAATGTGAGGAAGGAGGATTTGAATATGGATGAGATTTTTGGGCTCTCTACACCTAAGAAACTACCACTGGAAACTGTTGTGGAGCCNTAGGCTTCCATACCATCTTTATTCTCTCTGAGCAGTGCCTTTGCACAAAGCGTTTCTCTCTAATAAGATTGTTGTAGGGATAATGGGTCTTGAGTGAGCTTATGTTTGTCACACTGGATTGCAAT
Gma.4374.1.S1_x_at	BM178538	At2g45550	1e-53	Metabolism	Cytochrome P450	CYP76C	CATGACTATGAGCTATTGCCATTTGGTGCTGGGAGAAGGATGTGCCCTGGGTACCCTCTTGGCCTTAAGGTCATTCAAGCAAGTTTGGCCAATTTGTTGCATGGATTTAACTGGAGATTGCCTGATAATGTGAGGAAGGAGGATTTGAATATGGATGAGATTTTTGGGCTCTCTACACCTAAGAAACTACCACTGGAAACTGTTGTGGAGCCNTAGGCTTCCATACCATCTTTATTCTCTCTGAGCAGTGCCTTTGCACAAAGCGTTTCTCTCTAATAAGATTGTTGTAGGGATAATGGGTCTTGAGTGAGCTTATGTTTGTCACACTGGATTGCAATAAATTTTTCTCTCTTTTCATAACAATGTTAGAAAGAGAGAAAAAAAAAANGATGTTGTGGT…
GmaAffx.92525.1.S1_s_at	CF808250	At2g45550	2e-46	Metabolism	Cytochrome P450	CYP76C	TGTTTCTAGATTTATTTGTGGCTGGAATAGACACAACATCAAGCACGATAGAATGGGTAATGGCTGAGTTGCTACGTAACCCTGAAAAACTAGAAAAAGTTAGGCAAGAGCTTCAACAAGTCCTTGCCAAAGGTGAACAACTAGAAGAATCACATATCTCGAACCTTCCTTACCTACAAGCAGTGGTGAAAGAAACTTTTCGCTTGCATCCACCCACCCCAATGTTACTGCCACACAAGTCAGAAGTCGATATTGAACTATGTGGCTTCATGGTGCCT
Gma.4628.1.S1_at	BG156501	At2g45580	1e-101	Metabolism	Cytochrome P450	CYP76C	AAGCTCACGCCGTTCGGGAGCGGAAGACGAATTTGCCCTGGCTCCCCCCTCGCCGTTAGGATGCTGCACAACATGCTCGGTTCCTTGATCAACAACTTTGACTGGAAGCTTGAGAACAACATTGACCCCATCGACATGGACTTGGATCAGTCCCTCAGGGCTATCCCTGTTCTCGTAAATGCCAACTAATTCAACATCATCTGTATGTTGGCATGCCATCCCATGTACCTTTTTCTCAGAAACAGCAAACAGAAGCTTGATTCTTTGGTTTGAATGTTTCTCGTATGTGCTAGCTTTGATCCAGCTTGTTTCTTCCAGCCTGGGTTTAGGATAAATAAATAACCAGGCTTTGAGTAACATGATG
GmaAffx.93571.1.S1_at	CF809296	At3g61040	6e-18	Metabolism	Cytochrome P450		TGACTGCCACGTCACGCCCTCTACCATGGACATGAGG
Gma.2308.1.S1_s_at	AF022462.1	At4g15350	6e-75	Metabolism	Cytochrome P450	CYP705A	GACAGACCATCGGAGTTCCGTCCTGAGAGGTTCCTAGAGACAGGGGCTGAAGGGGAAGCAGGGCCTCTTGATCTTAGGGGACAACATTTTCAACTTCTCCCATTTGGGTCTGGGAGGAGAATGTGCCCTGGAGTCAATCTGGCTACTTCGGGAATGGCAACACTTCTTGCATCTCTTATTCAGTGCTTCGACTTGCAAGTGCTGGGTCCACAAGGACAGATATTGAAGGGTGGTGACGCCAAAGTTAGCATGGAAGAGAGAGCCGGCCTCACTGTTCCAAGGGCACATAGTCTTGTCTGTGTTCCACTTGCAAGGATCGGCGTTGCATCTAAACTCCTTTCTTAATTAAGATCATCGTCATCATCATCATATGTAATATTTACTTTTTGTGTGTTGATA…
Gma.5611.1.S1_at	AW309826	At4g37360	1e-110	Metabolism	Cytochrome P450	CYP81D	TACCACACGTGGCTTCAGAAGACATCAATATCGAAGGATTCAATGTTCCACGAGACACAATTGTGATTATTAATGGTTGGGCCATGCAAAGAGATCCTAAGATATGGAAAGATGCGACAAGCTTTAAACCTGAGAGGTTTGATGAAGAAGGAGAGGAGAAGAAGTTGGTAGCATTTGGTATGGGAAGAAGGGCTTGCCCAGGAGAACCCATGGCTATGCAAAGTGTTAGCTATACTTTGGGATTAATGATTCAATGTTTTGACTGGAAACGAGTAAGTGAGAAGAAGCTTGATATGACAGAGAATAATTGGATCACCTTGTCAAGGTTAATTCCATTGGAGGCTATGTGTAAAGCCCGCCCACTCGCCAGCAAAGTTGGAAGTTATTAACAATATTTTA…
Gma.5510.1.S1_at	AF135485.1	At5g06900	4e-96	Metabolism	Cytochrome P450	CYP93D	GTGGCTTGGTAGTTATTCCCGTCCATTTCTCTAATGCTGCCTAATAATTTAAAG
Gma.5510.1.S1_s_at	AF135485.1	At5g06900	4e-96	Metabolism	Cytochrome P450	CYP93D	CACATGGGCCATTGGTAGGGATCCAAATTACTGGGATGACGCACTCGAGTACAAGCCGGAGAGGTTCTTGTTCTCCGACGACCCGGGCAAGAGCAAGATTGACGTGAGGGGGCAGTACTATCAGCTCCTGCCCTTTGGGAGCGGGAGAAGAAGCTGCCCCGGAGCCTCGCTAGCGTTGCTTGTCATGCAAGCAACGCTAGCGAGTTTGATCCAGTGCTTCGACTGGATCGTTAATGATGGTAAAAACCATCATGTTGACATGTCTGAGGAAGGGAGGGTGACTGTGTTTTTGGCCAAGCCACTCAAGTGCAAGCCTGTTCCGCGTTTCACTCCGTTCGCTGCCTGAAGACTGTGAATGGAATGGTTTCTCTAGTTGTGTGTGCTTTACCTACTCTATAT…
Gma.4167.2.S1_s_at	AW423990	At5g45340	7e-52	Metabolism	Cytochrome P450	CYP707A	GGAGATTTTGGTCCTCCTACATCATCTGACCACAAAGTACAGGTGGTCTGTTGTGGGTGCAAAGAATGGGATTCAATATGGCCCTTTTGCTCTTCCCCAAAACGGCTTACCCATCACATTATTTCCCAAGA
GmaAffx.64037.1.S1_at	BI321162	At2g25160	2e-39	Metabolism	Cytochrome P450	CYP82F	CTGGAAGGAGAGTATGCCCCGGTTCCTCACTGGCTCTGCGTGTCGTGCACATGGTCTTGGCTAGACTCTTACACTCTTTCAATGTTGCTTCTCCTTCAAATCAAGCTGTGGACATGACAGAGAGCATTGGACTCACAAATTTAAAAGCTACTCCACTTGAAGTTCTCCTAACTCCACGTTTAGATACAAAGCTTTATGAGAACTAAAATTATATATTATGCTAGTTTTTTTCCTCAAAATTAGGGGAAGCCTCAAATCGGGGCCTTCCATCATGTAATAAATGTTCAACGGGGTTGCGCTGCTGTTACACTCATAGTTATCACATTTAAATCAGTCATCGACTTGATCAAAGTATTGAGTCATTGGGTTAGGAGGGGACCCAATGAGTCGTTAGTTGAC…
Gma.17702.2.S1_a_at	AW831290	At3g14680	4e-32	Metabolism	Cytochrome P450	CYP72A	GGCTAGGGAGGAGGTTTTCCAAGTGTTCGGGAATGAAAAGCCAGATTATGAAAGGATTGGTCAACTGAAAATTGTAAGTAACATAATTAATTAATTAATGGCTTGATTCATTTCAGTTCACCCTAATCATCGTCCTACACTACAGGTGTCGATGATTCTACAGGAGAGTCTCAGATTATACCCACCAGTGGTTATGTTCGCTCGGTATCTTCGTAAAGATACAAAACTTGGAGAGCTTACAATTCCCGCAGGAGTGGAGCTTGTTGTACCTGTGTC
GmaAffx.24227.1.S1_at	BQ298345	At3g14680	5e-81	Metabolism	Cytochrome P450	CYP72A	GATAGTGTTATCATTGCTTCTGCAACATTTCTCATTTGAGCTTTCTCCGGTCTATGAACATGCTCCAACGGTTGTGCTTAGTTTGCAGCCAAAACGTGGGGCACACATCGTTTTGCATAAACTATGATATGATTCATATATTGGAATTAGTCATCGGCTTGCGGGATAAGGCTACGCATATCTCACTTGGTTTAGTGTGTTATACATTATATTTCCTTTATATAGTATCAATCATGTACTTGTGTGTGGAATGAAAACTATCTTTAATTAAGGATCTTGCAAGTTGTAANGCAGGTGTATTTGAATATNTAGTATATGGTATATTGAAAACTATCTTTTGAGTTTGGTCACTGGTTACGGAGGAAT
Gma.153.1.S1_x_at	Y10491.1	At4g31940	1e-122	Metabolism	Cytochrome P450	CYP82C	ATCCACACAGATCATAACGTTTGGTCAAATCCATTAGAGTTTAAACCAGAAAGGTTCCTTACGACTGATAAAGATATAGACATGAAGGGTCAACATTTTCAGCTATTACCATTTGGAGGTGGTAGGAGGATTTGTCCTGGAATAAACTTAGGCCTTCAAACAGTTCGTTTGACACTTGCTAGTTTTTTGCATTCCTTTGAAATCTTAAATCCATCAACTGAGCCTCTTGATATGACTGAAGTCTTTAGAGCAACCAACACTAAAGCCACTCCACTTGAGATTCTTATTAAACCACGCCTATCTCCTAGTTGTTATGAAAGTATCTAATATTTAATTATGTGTTAGTTGTGTGAACCTGCTGTCTGTATTTTTTATTTTTAAACTATATGTAATCTGTTT…
Gma.6280.1.S1_at	AI988271	At3g04940	4e-41	Metabolism			GCTGGAAGATTCCTCAGGGAGAAAAACCCNGATATNAAGCTGTATGGTGTGGAGCCAGCNGAAAGTNCAGTTTTGAATGGAGGACAGCCAGGTAAGCANCTGATNCAAGGAATTGGTGCTGGTATCATTCCCAAAGTTCTGGATGTAAATCTCCTAGATGAAGTTATTCAGGTTTCAAGTGAAGAGGCTATAGAAACTGCTAANCTGCTTGCCTTGAAAGAAGGTTTGCTGATGGGAATTTCATCAGGAGCTGCTGCAGCAGCNGCAATAAAGGTGGGGAAGAGACCAGAAAATGCAGGAAAGCTCATTGTTGTGATTTTCCCCAGTTTTGGAGAACGTTACTTATCTTCACCACTGTTTGAATCCATTAGGAAAGAAGCTGAACA
Gma.4182.1.S1_s_at	CF920322	At5g28050	2e-63	Metabolism			GATGGGGGTCCCTTTGGTGCTATTATAGTNNTGTAATGATGAAATNNGTTGCTNGATGTCACAACATGGTTCTGAGGAACACAGACCCNACTGCTCATGCAGAAGTCACTGTNATAAGAAAGGCTTGTGAAAAGNTAAACCAGATAGAACTTTCAGACTGTGAAATATATGCTTCTTGTGAACCTTGCCCNATGTGCTTTGGAGCAATNCACCTCTCACGAGTTAAGAGGTTGGTTTATGGAGCAAAGGCAGAGGCAGCAATTGCTATTGGNTTCGATGACTTCATTTCAGATGCATTGCGAGGNACTGGATTCTANCAGAANGNCACAATTGGAGATTAAAAGGGCTGATGGCAAAGNNGCNAACATTGCTGAAGAAGTTTTTGAGAGAACNAANGGA…
GmaAffx.92834.1.S1_at	CF808559	At5g28050	6e-81	Metabolism			GCGAGGCACTGGATTCTACCAGAAAGCACAATTGNAGATTAAAAGGGCTGATGGCAAAGCGGCAAACATTGCTGAAGAA
GmaAffx.92834.1.S1_x_at	CF808559	At5g28050	6e-81	Metabolism			TAGCTTCTGCGTTTGCTGGACATAAGGAAGCTATACAGCAAAGGGACCACAAATTTTTAAGAATTGCTGTTGAAGAAGCCTATAAAGGGGTAGACTGTGAAGATGGGGGTCCCTTTGGTGCTATTATAGTATGTAATGATGAAATAGTTGCTCGATGTCACAACATGGTTCTGAGGAACACAGACCCTACTGCTCATGCAGAAGTCACTGTTATAAGAAAGGCTTGTGAAAAGTTAAACCAGATAGAACTTTCAGACTGTGAAATATATGCTTCTTGTGAACCTTGCCCTATGTGCTTTGGAGCAATTCACCTCTCACGAGTTAAGAGGTTGGTTTATGGAGCAAAGGCAGAGGCAGCAATTGCTATTGGATTCGATGACTTCATTTCAGATGCATTGC…
Gma.6764.1.S1_at	AW394737	At3g23940	1e-119	Metabolism			GGAATGCCTGAGATGTTAACACCAACAAGTGCAATAATGGGTGCAGGTCTTGGAAAGGAAGTTGCATTATTGACTGATGGAAGATTTTCAGGAGGTTCACNNGGATTTGTGGTTGGCCATATATGTCCTGAAGCACAGGAAGGTGGTCCAATTGGCTTGATTCANAATGGAGACGTAATCAATGTTGACATCAAGAATAGGAGAATTGATGTTTTGGTATCAGATGAGGAGATGGAAGCACGCAGGAAAAAGTGGACTGCTCCTCCATACAAAGCTAACCGAGGAGCTCTGTACAAGTATATTAAAAATGTGACACCTGCTTCTAGTGGATGCGTAACAGACGAGTAGAAAGACATACCTGCAGAGCAAAAGCTGATAGTATGCCTTGGTGAAA
GmaAffx.60847.1.A1_at	BU550307	At5g38630	9e-75	Metabolism			AATCAGTTCATCTTGCGTTACAGTTTGCCGCTCTCATTTTGAGCTTGATTGGTGTCTGGGCTGCTTGGAAGTTTCACATTGACAAGGGCATTGACAATTTCTACAGCCTGCATTCATGGCTAGGCCTTGCATGCCTTTTCCTATTCACCATCCAGTGGGGTGCTGGCTTTGCAACATTTTGGTACCCAGGAGGGTCAAGAAATAGTAGAGCTGCCTTATTGCCATGGCATGTGTTCTTTGGTATCTATATCTATTGCTTGGCTATAGCCACAACTGCTACTGGTATTCTAGAAAAAGCTACATTCCTTCAGGTCAACAACATCATATCACGCTATTCCAATGAGGCACTTCTGGTCAATTCCTTAGGCATTCTGATAGTCATTTTAGGTGGCTTTGTGA…
GmaAffx.26275.1.S1_at	BU547220	At4g34200	1e-96	Metabolism			AACTTGGTTAATGCTGATTTCACTGCNAAGCAAAGAGGGATCAGGATAACTGAGGAGANGGTTATTCTTGATGGTTCACCTGAGAATCCACTNGAATTCNTTCAGGTNCAGATTGCTAATGTGGAATCNCGATTTGCTAGTGCNATATCAGATTCTGGGGAGATTAAAGTTGAGGGTCGGGTNAAAGATGNNATCCCCCATCTNACAAAGGTTGGGTCTTTTGATGTTGATGTNAGTTTGGAAGGTAGNATCATACTGTGTAGGCANGTAGATCAACCAGGCATGATNGGAAAGGTTGGGAGCGTTTTGGGNGAGGAGAACGTGAATGTNAGNTTCATGAGNGTNGGAAGNATNGCTCCACGCAAGCAAGCTGTTATGGCAATTGGAGTGGACGAACAA…
Gma.17594.1.A1_at	AW310993	At1g64660	3e-16	Metabolism			TGAGCTTGGGCTACTACGAGACCCTCATGTCCTGCTCCGGCAGCAGCACCAGCAGTGAACTCAGCACTGAGGAGAAGGAGCTCGCCGGAATCTCGCCGGGGCTCGTGAGGATGTCGATTGGGTACATTGGAACCTTGGAGCAGAAGTGGAGCCAGCTCCAAAAGGCGCTCACTAGACTAAACGACTCTGGATACAACAAGATCGCTTGAATTGCTTTTCTCATCATGCACATGCACATGCACCCTCGTCTTCTTCCTGCTCCCTTAATGTTATGTTATCTAT
Gma.2311.1.S1_at	AF141602.1	At3g01120	1e-167	Metabolism	Amino Acid Biosynthesis/Metabolism	Methionine Biosynthesis	TGAAGCGGGTCTACTATCCAGGCTTGCCGAGTCANCCTGAACATGAGCTTGCCAAGAGGCAGATGACTGGTTTCGGTGGTGTTGTCAGTTTTGAGATTGATGGAGATCTACATACCACAATAAANTTTATTGATTCANTTGAAAATCCCNTATATTGCGGCCTCGTTTGGTGGCTGTGAGAGCATTGTGGATCAACCTGCTATTTTGTCTTACTGGGATCTTCCTCAGTCAGAAAGGGCCAAGTANAAGATTTATGACAACCTGGTTCGCTTCAGCTTTGGAGTTGAAGATTTTGAGGATTTGAAGGCTGATGTCCTGCAAGCTCTGGAAGCTATATAGACAGTTTTCCTGATTCACCCANGTTTTTTTNCTTTTANTAATNGTGNTATNTGTTNNTNN…
Gma.3362.1.S1_at	BQ454262	At1g08490	2e-92	Metabolism			GGTGGAGCTCGGTAGATATCTGTATGAGAGGCTNCTTTCAGTCCCAAATATTCGCATCTATGGGCCAGCACCTTCAGAAAAAGTCGAACGAGCTGCCCTTTGCTCTTTCAATGTTGAGAATTTGCACCCTACTGATCTTGCAACACTTCTGGATCAACAGCATGGAGTGGCTATCAGATCAGGTCACCACTGTGCCCAACCCCTCCATCGCTATTTAGGTGTCAGCTCAAGTGCACGGGCTAGTCTCTATTTCTATAACACAAAGGAGGATGTAGACAACTTTATCCATGCCCTCAATGACACAGTCAGCTTTTTCAATTCATTGATGTAACTGAAATGTATTTTTATGTATATTATATTTTGTTTATACACGAATGAGAGGGTTGGCTTAGTTGGTAG…
GmaAffx.92897.1.S1_s_at	CF808622	At3g23490	8e-58	Metabolism			TCACCAACGTCTATGTTGCTCAGCTTCTCAGGAGACAGGCTCAGCTCAATCCCCAAACTGCCCCTCTACTTCGGGCAGCGCTGCCCGACCTGCCCCAAGACCTTGTTTCTGAGATGATGAGACCCCCTTTGAGGTCTTATGACCCTAATCTCATCCAAGACCCCACTGTCTATAGGTTGAATGAAGCTGTTATGCATTTTGGGGAGAGCATCAAAGAAATAATCAATGAGGAGTTTGGTGATGGGATCATGTCAGCAATAGATTTCTACTGCTCGGTTGATAAAATTAAAGGAGTAGATGGGAAGGATCGTGTGGTATTGACATTTGATGGGAAATATTTGCCACATTCAGAACAGAAATCTGAGCACATGGTTTCAAGAACAAGGCCACTGGGAAAAC…
Gma.2434.1.S1_a_at	AW348548	At3g02770	1e-46	Metabolism			GAATATCTATCTCTCATTCTCTCGTGCCTCAACGCTTTTTTAACTCCTTTCGCTTTTCCATTCCAACCTCTTTCACACTTCAGATCTGTTTCTTCATCGGTTGTTCAAGTAAATGGCCTTNGTCACCACTGCTGAAGTGTGTGATGCGAACCCNCAGTTAATTTTGAGTGGGGAGCTTCGTGCCCTTCAGCCAGTTTTTCAGATTTANGGNCGTCGACAGGTNTTCTCTGGACCTATAGTTACCTTGAAGGTGTTTGAAGACAATGTTTTGGTTCGTGAGTTCCTTGAAGAGAAAGGCAATGGAAGAGTNCTNGTTGTTGATGGAGGCGCGAGTTTAC
GmaAffx.79869.1.S1_at	BI702308	At2g26830	4e-50	Metabolism			TGCATCGTACAACTACAGAGGCTATGATATAGGAAACCACTTTGCAGAATATGCTGGCTTTGAATGTGACTATGACTTGTACCCAAATATGAATGAACAATATCATTTTCTCCGGCATTACTTGAAACCTGAAAGACCCCAAGAGGTTTCTGAGAAAGATCTTGAGACTTTGTATGTTGAGGCAAATACATTTTCCCTTGCTTCTCACGTTTTCTGGGCTCTGTGGGGTCTAATTCAGGCAAAGATGTCTCCAATTGAATTTGATTATCTTGGTTACTTTTTCCTTCGATACCACGAGTACAAAAGGCAGAAAGAGAAGTATTTCTTGTTGGCACGGTCCTACCTTTCAGGATGCAAGAATGAGTAGATAGATAGATTATGCTTACTCAGTCACTCGTG…
GmaAffx.82560.1.S1_at	BE058939	At3g29200	4e-17	Metabolism			GAAGTCCAAGACTTATGGGCAAGAACTGGTTGTAACTACGAAGGAACATCGAACTGAACCTGTCTACAAAATAAATCCAAGCTTGGTTGCTGATCTATACAGTGATTGGATCATGCCANNGANAAAGGAAGTCCAAGTTTCTTATTTATTGAGAAGGTTGGATTGAACATAACAAAAAGTACCTTTTCAATTACAGTGTTCATAGGGTATTTATATTTTCTAGGAAATGATACTTGCAATGGGTAATTTCTCTTGAATCATGACTATAAACTTTAGTTTTTGTAATTAACATATGAGGAAGCTCATATTGGGTTCTTAT
Gma.1445.1.S1_a_at	BQ454241	At1g80820	2e-88	Metabolism			GATGAAAAGAATCCGAGAGCAAAACCCTACACTTTTTCA
Gma.1445.1.S1_at	BQ454241	At1g80820	2e-88	Metabolism			ACAGGCGTATGTTCATGTTAGGGACGTGGCATTGGCCCACATACTTGTTTATGAGAAGCCTTCTGCCTCTGGTAGATACATATGTGCCGAAAGCTCTCTCCACCGTGGAGAATTAGTTGAAATTCTCGCCAAGTATTTCCCCGACTACCCAGTTCCCACCAAGTGTTCAGATGAAAAGAATCCGAGAGCAAAACCCTACACTTTTTCAAATCAAAAACTGAAAGATTTGGGATTGGAATTCACCCCAGTGAGTCAGTGTTTATATGAAGCCGTCAAGAACCTGCAGGAGAAAGGGCACCTTCCTGTTCCTGCAAGGCAGCAGGAAGATTCAACTACTGTGAAACCTTAAACGAGCTATCCCTTTTTATCTAATTTGTCAACAAACAAGAAGCTGCAGCT…
Gma.5491.1.S1_at	AW309940	At2g23910	7e-61	Metabolism			TACGAGGATGTCTCATCCTACGGTCGTTATTTGTG
GmaAffx.90414.1.S1_at	CF806139	At2g23910	1e-14	Metabolism			CGTGACCGTTGATTTAGCTTTCTTGGTGGACGCCCACATCTGTGTCTACGAGGATGACACATACTACTGTCGTTNTTNGNGCTTCAATCACATCATAAACACCCATGAGGACGCTGTTCAGCTCGCCCGCAAGTTGACGCCTGGCGCATCTTCCTCCTTGCCGCANAGTGATGACTATGGGAAGAGTTTTATCGAACAGAGAATTAGCAACACGAAGTTGAACACATTGCTGGTGGACTTCGAGGCATAATCGACTCCCATGGTCATCCTTTTGGACGGTGATTAGAGCAATCACCTTGGCTGTCTTTCTGCGGGAAAGT
Gma.8251.1.S1_a_at	AW394443	At4g34230	1e-125	Metabolism			GAAAGTATACTACTAGCACGACACACGCAACATCCATCCTTCCATCATGAAGAGTCTGGAAAAGTTATTAATTAATTGAGAACTAAAGCTGTATTTGTTGTTCACTCTAAAAAAGAAGCTGTGTTTTGTTTATTAAAAAGAGTGCTCTGTTTTCTCTGTTTTGGTTACACGACGTTCATTAAAATATAGTATTTGATATCAAATTCTCGTGGAAAGCAAAAGACACCATAGTTTTGTTGTGTA
GmaAffx.86175.1.S1_at	AW349132	At5g19440	1e-41	Metabolism			CAATGGTTCACCAACGTTTTCAAATAATAGTTTTGGGTGGATCAATGTGAAAGATGTTGCAAACGCGCATATTCAAGCATATGAGATTGATTCAGCTAGTGGAAGATATTGTCTGGTTGAAAGAGTGATACACTTCTCCGAACTTGCAAAAATTTTACGTGATATGTACCCAACTTTACAGATTCCAGACAAGTGTGAAGACGATGAGCCTTTTATGCCAACATTTCAGGTTTCCAAAGAAAAGGCAAAGAGCTTGGGAGTTGAATTTATTCCCTTGGAAGTGAGCCTCAGGGAGACAGTTGAAAGTTTAAAAGAAAAGAAGTTTGTGGACTTCTAGTTCGTGATATCTCCTAGAAGAATAAATATTGATAACACTAACTTTGTCTAGTCAGTGATTTT…
Gma.4351.1.S1_at	BE023594	At1g49670	1e-144	Metabolism			GAACACCTTTCATATCATGAACAATTGTATATTTTGACTCTCGGTGAAAA
GmaAffx.49521.1.S1_at	AW348568	At5g65780	5e-54	Metabolism			TATTTGGAGGAGGTTTCTTCATGCAACNTTTTNGTTGTTAAGGGTAACGTTATTTCAANCTCCAGCTATTAAAGGGACAATCCTACCTGGCATTACTCGCAAAAGTATAATTGATGTTGCTCGAAGCCAAGGGTTCCAGGTTGAGGAGCGATTAGTGTCAGTGGATGAATTGCTAGATGCTGACGAGGTCTTCTGCACGGGAACAGCTGTGGTTGTATCACCTGTTGGCAGTATTACTTATCTTGACAAGAGGGTAGCATATGGGGATGGTATTNGCGTGGTTGCACAGCAACTTTATACTGTCCTTACCAGATTACAGATGGGTCTTACGGAGGATGAGATGAATTGGACTGTTGAGCTGAGATAAGCGCNCCATGNATAGTTTGCAGTTCATGTTTT…
Gma.15863.1.S1_s_at	CD413163	At4g25700	1e-101	Metabolism			CGAGCTTAACGATGTATTTGCAATAATCAACGCTGTCCCTGCCATCGCTCTCCTTTCCTATGGTTTCTTTAACAAGGGACTGGTCCCTGGCCTTTGCTTTGGTGCGGGTCTTGGAATTACNGTCTTTGGGATGGCCTACATGTTTGTACACGATGGATTGGTTCANAAGAGATTCCCGGTGGGCCCCATNGCNAACGTGCCCTATCTCAGAAGGGTGGCCTCTGCTCACCAACTT
Gma.1546.1.S1_a_at	AW348242	At1g62660	1e-108	Metabolism			GCAAGCAAATCGTTGGCAGCGCTGTTCCAGTACTTAAAGATGAAAAGTTTTCCTTGCGGATACTGGTGGACCATTCTATTGTTGAAAGCTTTGCTCAAGGTGGAAGGACGGTTGTGACATCTCGGGTTTATCCAACAAAGGCAATCTATGGAGCTGCTAGGTTGTTCTTGTTCAA
GmaAffx.15940.1.S1_at	AI522941	At1g12240	6e-48	Metabolism			TCTCTTCCCTTGTTGCCTTTGGAGGGTACAGGGCCTCCAACGCGCCNCATGCNGACGTGNCATCGNCANCATCGAACGATGANCAACCTAGTCCNACATCGGTGCCTTCTCCGAAATGGTACCCGGTTTCNCGNGGTGTTTCTTCNGGGGTGTCNGAGAAGTCATCAAGCATGTTGTTTGCGGTTAAAGATGGAGCTTCGNANGCATTTCCNTGGGACAANAGCATGNTGTCNTGGCAGAGAACTGCTTTTCATTTCCAACCAGAGAAAAACTGGATGAACGATCCNAANGGTCCTATGTACTACAAGGGATGGTATCACTTNTTCTACCAATACAACCCGAACGGTGCAGTTTNGGGTGACATAGTTTGGGGACANGCAGTNTCAAGGGACATGATCC…
Gma.3508.1.S1_s_at	BI968765	At3g13750	0	Metabolism			ATCATGCATTGCCTGGCCAAAAACAAAGATTTATATAAGAGAATTTGGATGCGCAAAGACTGTGTATACTGTACATAGTCAAGTCAGGCTATTGTGCTGAATATTGCCCCATGTATTACAGGGCTTGTATCAATGAAGATTGAGCCCTTACACATTTATTTAATTTACTATGATACAATGGAAAGAATTGTAGACACGCAAAATGTGTCGGAGAGTATATTTGCTATATTCTGCCAGAAATAATTGTGTTTTCCCATTATAATTATT
GmaAffx.10297.1.S1_at	BE475510	At3g13750	7e-42	Metabolism			GCACAGTGACAGTGTCTCCTGAAATTTTTGGAGGAGATCCTTGTCCAAGTGTCATGAAGAAACTCTCAGTGGAAGCCATTTGCACCTGATCATTTTCAATCTCCGAAAATAAGTGGAATAAAGTTTCCATATTGATTTATTCTGCAATTGAATACATGGTCTTTGGGTCAAAGTTTACACCTGTAGACCACCAGAGGCATTAATTTGGCTTTACCAAGGTGAAGTTGCAAATGAACACAACACACCATGTGGTTGAAAGCCTGCTGGGATGATTGTNGNGGNTTTNTGTGTATATATATTGGTGTTGTGNTTGTTATACTGANGTGGAGGAGAGGNTGAAAANGNTACCTGATGCACATTGAGACGACATCGATTGAGTCCATGTGCAAANTTGGTTTT…
GmaAffx.33518.1.S1_at	BU760871	At3g13750	9e-62	Metabolism			TACGAGCTATGATTACGATGCGCCCCTTGATGAATATGGATTGGCCAGACAGCCAAAGTGGGGTCATCTGAAGGATTTACATAGAGCAATAAAACTCTGTGAACCTGCTTTAGTATCTGGAGATTCTACTGTACAACGGCTTGGAAACTATGAAGAGTGGCATTTGGAAATCAGCATTACAACTTGCCTCCTTGGTCTATAAGCATTCTTCCTAACTGCAAGCACACTGTTTATAACACTGCAAGGGTTGGTTCTCAGAGCACAACAATGAAGATGACTCGTGTTCCTATTCATGGAGGACTATCTTGGAAAGCGTTTAATGAAGAAACAACCACTACTGATGATAGTTCGTTCACTGTGACTGGCTTGT
Gma.1571.1.S1_at	BQ612406	At1g74920	0	Metabolism			AGAAGTTTTTGGACCTGTGCTATGTGTGAAAACATTCAGTACCGAAGAAGAAGCTATTGAACTAGCAAATGACACACACTACGGCTTAGGGTCTGCTGTAATGTCAAAAGATCTAGAAAGATGCGAGCGCATATCAAAGGCTATTCAGGCTGGAATTGTATGGATAAATTGTGCTCAACCAAGCTTCATTCAAGCTCCATGGGGAGGCGTTAAACGTAGTGGTTTTGGTCGTGAACTAGGAGAATGGGGACTCGAGAACTATTTAAGTGTGAAGCAAGTGACCAAGTACATATCTGATGAACCGTGGGGCTGGTATCAGTCGCCTTCAAAGCTGTGATATGAATTGCTGTTCTAAAATCTGGCATGAATAAGTTGTGGGGGACATTAATTTGTGATGAT…
Gma.5913.1.S1_at	BM731481	At1g74920	0	Metabolism			AATGACACTGTATATGGCTTGGGTTCTGCTGTAATATCAAATGATCTAGAAAGATGTGAGCGCATTACTAAGGCTTTTAAGGCTGGAATTGTGTGGATTAATTGCTCTCAACCATGCTTCACTCAAGCCCCATGGGGAGGCATTAAACGCAGTGGTTTTGGTCGTGAATTAGGAGAATGGGGACTTGATAATTACTTGAGTGTGAAGCAAGTGACCCAATATATCTCTGATGAACCGTGGGGCTGGTACCAGTCTCCTTCAAGGCTGTGATAGGTATCCAAAAGCTAACATTAATAAGTTGTGGGTAATATCAAATTACGATTATGACCCCAAAGTCGAGAAGA
Gma.11275.1.S1_at	CD407624	At5g64370	0	Metabolism			CCCGCAATAGGGACGGCTTGTTAGTAACAGACATGGATCTTAACCTGTGCAGGCAGGTGAAAGACAAGTGGGGTTTCAGAATGACTTCACGGTACGAGTTATATGCCGACACACTCGCCCGCTATGTGAAACCAGACTTTGAGCCACAAGTCACCAGTGACCCCTTGTTGCATAGGAAGTCCTTGTGAACTATGCTCTCAAGTGTTGGTGTTAATATGTGTTCATTGCTTGTGGTTCAGATTCTGGTCTGTCGTGGGATGGCCAGTGGAAACAACCTTAAATAAAGTTCTTTCATGTTGAGTACATGTTCATGTATTAAATTCTGTTGTCAATGGTTCACCGTCATGGTTGGTTGATTTGGTCCCATTTTACATG
Gma.483.1.S1_at	BU083513	At2g16370	0	Metabolism			GCATCTTATGCCCTTTTGACATGCATGATTGCTCATGTTTGTGATCTCATTCCNGGTGATTTTATNCATGTTATTGGGGATGCNCATNTTTACNGCAATCANGTGAGGCCTTTGCAGGAGCAGCTCCATAACCAGCCAAANCCTTTTCCAACTTTGNAGATAAATCCAAANAAGAAAGATATAGATTCTTTTGTGGCTGCTGATTTCAAGCTCATAGGCTATGATCCTCACCAGAAGATTGATATGAAGCTGTCTGTCTAAAATCTGGGGATTCTCACTCCTTCAGGTTGTTTCTGCTTTTTGAAATGAGGCACAACCTTAGGAAGATTATGTTAAATCTGTGTACAATTAAAGAACATATCGTAGCACATACTTCATCGCATAAATACTGTTACTTAA…
Gma.2119.1.S1_at	BU081878	At5g03650	1e-102	Metabolism			GTACATGTGCCTTGCTAGGTAATAAGTTGTGATANCACACCCATCTTCCTNTTTTTACTTTTTAGGATTTANCGTCTTGACATGTNATAAGTTGCGNCNCGATTGANAAATGTGAATCAACAAAGCTATGGTCCGCGAACCTGAGACTCAATGTACCTATGCACNTATCAATCTTCATNAAGTGCNTACTCTGTTNAAGAGTTGGAAGNNNNNNNNNNGNTTTTACCGTGGGAAATTTTGCAGGAGGCTTTTANANATGTTTCCTTTAGATTNNATTTTTATTTATTGNTTAANCTGTTTCCTTTATATTTNAAAGTTGAGTTGTAGCANNANTCANAGTATTCTATGCAGTGTAATAAAGAC
Gma.11238.1.S1_at	BQ454110	At5g60600	0	Metabolism			GGCATTCAAGGCCATAGTAAGATGAGCATTGTCATATCCAATTATTGTACACATGTAATATAAGATAACACTCAATGCTTAAGTTTGAGCCTAGTTTTAAGTTCCTTTTGAGAAAGATCCCAATTAAAGCTTGTTGTGAGGAAATCGACAGCTAGAACATGTATACAGATAACAGTGTATTGCTTTGCCCCATCAGCCATCAATAATAAT
GmaAffx.90026.1.S1_s_at	CF805751	At5g60600	2e-81	Metabolism			TCTCCATGACCTTCCTTATACAGAAGACAGAATTAGCAGAGTGCATGCAGCCAGACGGTTATTTGAGTACCTATCTGACAATTCTCTAAACTTCCCTGTTATTCACCATATTCAGTTCCCAAATGGGATTCACAGGGATGACTTGGTAATTGGTGCTGGTTCTGATGCTGGAGCCCTTCTGGTTGATGGGCTTGGAGATGGACTACTTTTGGAAGCCCCGGACAAGGATTTTGAATTTATTAGAAACACTTCTTTCAATTTGTTGCAAGGCTGCAGAATGAGAAATACAAAGACAGAGTATGTCTCATGTCCATCCTGTGGCAGAACATTGTTTGATCTTCAAGAAGTAAGTGCACAAATTCGGGAGAAGACATCACACCTC
GmaAffx.11858.1.A1_s_at	AW351023	At4g34920	4e-17	Metabolism	Phospholipid Biosynthesis		AGTCAGTGCTTCTCCAAAGGGTATGCAGATAGACTGCAGATTTTTTCTACGGATTTCATTGACCAGGATTTCGTTGATGCATGCGTTGGACTCACACGTGCCAGGGTTGAGGGTAGAGCCTGAAAATTGAAATTATCTCTCTTATGCTCGTAACTCTTCTTGTTCATGGTTCTGTCTCTTTT
Gma.4279.1.S1_at	CA935007	At4g38690	1e-142	Metabolism	Phospholipid Biosynthesis		TTTGAATCACTTGAGCGAGCACCCTCCCGTTACGTCGCGCAAATACTTCTACAGGATCGAGAACACCGTTACCCCCGTCGCGGATAACCCCGTTCTCTGTGTTAAACCTGTTACCCGACGCATTCATGGCTACGCCAGGCTCTTCATCGCTCAATGCTTCGCCAAAGGATTCGCTGATAGGCTTCAGGTCTTCTCCACGGATTTCATTGACGAGGATTTCGTTGACGCATGCGCTGGACTCACTCATGCAAGGGTCGAAGGGAAAGCCTGAATGCCCGAATTCAACTATTAATATTGTTTGTTAGGGATGGATGTTTTGCTTTGTGTGTTCCTTTGATCTTTGATGGTGTCGTCACTGTACTTTTTTTATTTATTTGTTGTAAAGCTGTATAGATTTTA…
Gma.2294.1.S1_at	BI425775	At1g09780	1e-159	Metabolism			CCAGCGACTATGAGACAACTCTCGTAGAAGTGGTTGATAACTAGGAACCAATAGATGAATTTTTATAATTTGAAAAACAAACAGGGAAAGCTGTAGATTGCAGCCCTCAAAATAATTGAAAGTTTTCATCCTTATTCCACATGTGTGGTGGTTTTGTTCTTATGAGTTACCAATACCAGTCTGCAGTTGACAGAAAAGTATACCTAATTAATGGCATTTTGGCACTCTCTTTTAACT
GmaAffx.90459.1.A1_s_at	CF806184	At3g08590	4e-58	Metabolism			AAGGCTAGGGATGCTATTCTTAGCGGGAAATTTGATCAGGNNCGCGTCAACCTTCCAAATGGTGACATGGTGGGGCATACAGGTGACATTGAAGCAACAGTTGTGGCNTGCAAGGCAGCTGATGCTGCTGTGNNNNTGATTCTTGATGCAATAGAGCAAGTGGGTGGAATTTATNTTNTCNCNGCTGACCANGGGAATGCNGAGGATATGGTCAAGAGGGATAAATCTGGAAAACCACTTCTAGGCNNGGATGGAAAAATCCAGATTCTTACTTCCCATACTCTTGAGCCTGTGCCAATTGCTATTGGNGGTCCNGGATTGGCCCCTGGTGTNAGATTCCGNAANNATGTTCCAACNGGNGGNCTTGCCAACGTTGCTGCAACTGTGATGAATCTTCAT…
Gma.2427.2.S1_a_at	BU925875	At4g22570	6e-18	Metabolism	Nucleotide Biosynthesis/Metabolism		TCAAACTCACTTCCCCACTTATTTATACAATGTCGGCTTACAAAGACCAGGATACCCGTCTTCATGGCATCAAAACTAAGATTCGTGTCGTCCCCAATTTCCCCAAATCCGGTTCGTTTTCTCCCCTTTCCTTTTTTGTTGTTTTAAACTTCTGTTTTTTTTTAATATTTTTGTTTTCCGACTAAGAAACCAAAGCCTTTGAATTCATATTTAGTTTGACTTCCGTTTTTCAATTTCTAGAAAGTCTTCTTCGGAGGTTTCGTTTTTTTTTTTTTTNNCAGTTTCAATGGTTTTTTTTTTTNGCAACGGCAGGTATTATGTTCCAAGACATTACTACTCTATTGCTTGATCCCAAAGCATTTAAGGACACAA
GmaAffx.90963.1.S1_at	CF806688	At4g13940	1e-109	Metabolism			TCCAGACCGCCGTTCTCATTGAGACCCTCACCGCCCTTGGCGCCGAGGTCCGCTGGTGCTCCTGCAACATCTTCTCCACCCAGGACCACGCCGCCGCCGCTATTGCCCGCGACAGTGCCGCCGTCTTCGCCTGGAAGGGTGAGACCCTCCAGGAGTACTGGTGGTGCACCGAGCGCGCCCTCGACTGGGGCCCCGGCGGTGGACCCGACCTCATCGTCGACGACGGTGGTGACGCTACCCTTCTCATCCACGAAGGCGTC
GmaAffx.90963.1.S1_s_at	CF806688	At4g13940	1e-109	Metabolism			ACTTCGGCCGCCTCGAGATCGAGCTGGCCGAGGTCGAGATGCCCGGCCTCATGGCCTGTCGGACCGAGTTCGGCCCCTCCCAGCCCTTCAAGGGGGCCCGCATCACCGGCTCCCTCCACATGACCATCCAGACCGCCGTTCTCATTGAGACCCTCACCGCCCTTGGCGCCGAGGTCCGCTGGTGCTCCTGCAACATCTTCTCCACCCAGGACCACGCCGCCGCCGCTATTGCCCGCGACAGTGCCGCCGTCTTCGCCTGGAAGGGTGAGACCCTCCAGGAGTACTGGTGGTGCACCGAGCGCGCCCTCGACTGGGGCCCCGGCGGTGGACCCGACCTCATCGTCGACGACGGTGGTGACGCTACCCTTCTCATCCACGAAGGCGTCAAGGCCGAGGAGC…
GmaAffx.89562.1.A1_at	CK606162	At3g23810	4e-37	Metabolism			GTCGATTGATGAACTGGGATGCGCCACTGGACACCCCAGTTTTGTGATGTCCTGCTCCTTCACCAACCAGGTCATTGCTCAGCTTGAGTTGTGGAAGGAGAAGAGTACCGGCAAGTACGAGNNGNNGGTTTNCGTTTTGCCCAAGCACCTTGATGAGAAGGTGGCTGCACTTCACCTGGGCAAACTTGGAGCTAAGCTGACCCAGCTTAGCAAGTCCCAGGCTGATTACA
Gma.11164.1.S1_at	AW350722	At2g33150	0	Metabolism	Amino Acid Biosynthesis/Metabolism	Isoleucine Catabolism	TGCTGCAATTCCTGTTGCTGTTAAGGCTGCAGGTCTAGAGCTTGATGATATTGATCTTTTTGAAATAAATGAGGCATTTGCCTCCCAGTTCGTGTATTGCCGTAACAAGCTAGGGCTTGATCCAGAAAAGATCAATGTTAATGGAGGTGCAATGGCAATTGGGCATCCTCTGGGTTCAACAGGTGCTCGATGTGTTGCAACTCTGTTGCATGAAATGAAGAAACGTGGCAGGGACTGTCGATTTGGAGTTATATCTATGTGCATAGGTACTGGAATGGGGGCAGCTGCTGTTTTTGAGAGTGGTGATTGTGCTGATGAGCTATGCAATGCCCGGAAAGTGGATGACCTTCTTTTATCCAAGGATGCTCGCTTGAAATAGTTACTTCATACTCACTATAT…
Gma.6558.1.S1_at	BU084402	At1g36160	8e-58	Metabolism	Fatty Acid Biosynthesis		CTTGGTTAGAGGACCCTGTTTGTGTCTTTTAAATGTAACGCAATTATTTGTGTTGATTCCATTGGCTAAGTTGTTATCCCCAAGGGAAAGGAGGCNGTTGCATCCCTCATTGCTGAAGGGATCCGTTGCTTCAGAGTGTAAATGAAATGAGTCCTGGATGGTAATTAATTTATGCAGTTAGGGGATCACAACCAGCATCACCATGTTCCATCTATTTATTTGCTGGTTGATTGATTCTTTTCGTATANTTGAANAAAATNNNAANNNNNNGNAACATTGTTTTTAATGCATAACGATTTTGGGTAGTCA
Gma.2543.1.S1_at	AI960145	At1g80600	1e-174	Metabolism			AAGAAAGGCCTCTACTTCAAAGAATTACTCAAGCAGAAGTTAGGAGGAAACCAACATGTGAAAGAAATTCGTGGTGTTGGGCTAATCATAGGAATAGATTTAGATGTACCTGCCTCACCCTTTGTCGATGCATGCCGAAATTCTGGCCTTTTAGTATTAACTGCTGGAAAAGGAAATGTTGTCAGGCTTGTCCCACCATTGATCATAACAGAGAAAGAGCTCGAGCTAGCGGCCGACATTTTGTGCAAAACTTTACCAGTTCTTGATAACTAGGAGTGTAAGAGAAAGAGGTTTGGCTTTACAAGCAAAATAGAAAACTTAATTGGTTGTGTATTGTTGAGTAGCTTTTAGATGCCAAAACTTCATGGTTTCCCTTTCATTTAAGATGTCTCGATGGTA…
Gma.4831.2.S1_at	CA852180	At1g72880	6e-24	Metabolism			TACTTTAGACTAGAGTTTTCGGACAATCAGCAGGAGGAAGAANTAGACGAAGATCTGGATTACAGANCACTTGAAAGTGGATATGTNGCAGTGACTCCGCTGTCTNTTTCTCCTCATATTGAGACTGNTATTCAAATGGCAGCTTCTGATTGGATTTCTGCTGTGCTTCCTGGTGAACAATAAATTTNGTATGATTGTGTACATTTGAGATTTATGATGATTCTTTTTTNTNTTTTNTTCTNNNNTAAAGCAAANATGGAGCAGAAGCGGTAGTCACACCNATTCAATAGTGGATTTCCACTTGTACTATTTTTCTTTTTCTANATTNTTTTGTTCCCTTCTTCATTGTTTCAGTNCCTTTNGGTNACTTAGTTNTTTCTGATTTGAAGCAAATGCTTC…
Gma.16982.1.S1_at	BF425703	At4g14930	4e-16	Metabolism			TGCTGCTCTCACTCATGTGGAGGTAGATTGTCAGGCCTATTTTAAGAATTGGCTACAAAGTGTCCCCGAACTCCCCTCGTCATCATCTTTATAATGCTATTCCTCCGGTTCACTGGAAGTGATGCCAACTCAATCTGTTGCTAAATCAATTATTTTGATCCTGAGCAATTTGGTTGCTCCGGTATGCATGCCATTTCTCCATTATTATCATCGGGCAATAAAGACATCTCAACAGTGTTATATAATTGAATGAGAGCTTAATTTCTGGAATCTNNNNAGTAATAACANGCCACTNNTTTTTAGATTAATATAGTAGCAATTCTTAGTCTGTCTT
GmaAffx.38388.1.S1_at	CA852972	At1g69640	0.005	Metabolism			TGCTACCTATTACCATTTGATTTTCACCCTTGTATTGCTTGCTGCTACACTCAATAGTCATACCTGGTATCCA
Gma.8520.1.S1_at	CA802722	At5g51260	5e-54	Metabolism			GCTTGCTGGATATCACACATGGGAAAAGTTAATTACCAAGAATACATCTGAATACCATGGTAAGACAGCAGTTACATACAAATCTACTGAGAGAAAGAAGCTGGAGGAAAAAGGATACAAAATCATTGGAAACATTGGAGACCAATGGAGCGATCTATTAGGAACCAACACAGGCGATAGGACCTTTAAGTTGCCTGATCCCATGTACTACATTAGTTGAGGTCTCTAGGGCTCTTACTAGCATGTTCCTATGAATAAAATAAGATGCATGTTGTAATAATGGAGAGATCGACTTAAACCAAGGAGCACTCGTTAATTAANTGCTATGTATGTNNNNGACTTTGTGTGAGACAAAAGGTCACGTGGTAAGAGACTGTACAAGCACAACGGTGTTTTATC…
Gma.5618.1.S1_at	BU549496	At2g05710	0	Metabolism			TGGGTATTGTTCCTCTTTGCTTTAAATCTGGTGAGGATGCTGACACATTGGGATTGACTGGTCACGAACGTTATACTATTGACCTCCCAAGTAACATCAGCGAGATAAGGCCTGGCCAAGATGTCACNGTAACAACNANTACNGGAAAATCTTTCACCTGCACAGTTCGCTTCGANACNGAGGTGGAACTTGCTTACTTTAACNATGGGGGCATTCTTCCNTATGTCATCAGGAACCTCATTAAGCAGTGAAGTCATGGCTGATGGGAAATGTTAAACNATGTTGCCACTGCGTGTACACGTTTTGAGTGGTNNNAATANAATGTGAGAGAAATGAGAATAAATTCAATAAATAGGAAAGATCCCTTCTTAAGAAGGCAATTTTTTGACANTTCCAGGT…
GmaAffx.15177.1.A1_at	BU548038	At2g36840	6e-75	Metabolism			TTAGGATGGAACTACTTCGTCCGCTCAGAATAACTGTTGTAAGCAGGGGTCCTGATACAGAGCTGCTGGTTGCAAACCCTGTGGAGTTGTCGGGCAAAGGACGACCTCTTGTTTTTTATGATATTACTCTTGCTCTCAAAATGCTTGGCCCTTGCATATTTTCGGCTGAAGTTGGAAGACATGTGGTTGGAGACCGCGAGTGGGAAGTTTATAGAATCTTGCTTGATGAAGGGGAGGGTTTATCCATTCCAAGGAATAAGATTGAGAAAGGAGTTTGGAAGATGTTGATGGGTTGGGAGTGATCCATGGCTGGTGGCATTGTTCATCTTGGATGAACCTGTGCCCGTGTACAGATAACATGGTTATAATGTAGTTATGATATGTAACTTGTAATTATGA…
Gma.1451.1.S1_at	BE209936	At2g39570	1e-149	Metabolism			GAACTTCTGGTTGCTAATCCTGTGGAGCTGAGTGGAAAGGGGAGACCCCGTGTATTCTATGATGTTACGTTGACTTTAAAAGCGTTGGGAGTAGGCATTTTCTCGGCTGAAGTTGTTAGACATTCAACACAAGAACGTCAATGGGAAGTGTATAGATTTTTGTTGGAGGAAAGCCGTGACTTTCCATTGACCAGAAGCCAAGCAAGAACTCAGATTGTTGACAAAGTTAGAAGAACACTGATGGGCTGGTAATCTGGTTCAGTATCAAATGAAAAAGCACTTTCCGTTCAGTTTTTATGTTAAATATCAATTTGGTTTGCCGTTTGAATATGGTTAAGTTAGCAGGGTATCTAATTAACGACAAACATATACTTTTAGCATTGTACATCATCTTATGTT…
Gma.4230.1.S1_at	BE820796	At4g25050	2e-28	Metabolism	Fatty Acid Biosynthesis		ATTGCAGCCCAGAGGGCGTCGGTTTCAGCTTAGATGTGCGGCAAAACCAGAGACAGTGAAGAAGGTGTGTGACATAGTCAAGAAGCAATTGGCACTGCCAGATGAATCAGCTGTTACTGGAGAGTCTAAATTTGCTGCGCTTGGAGCTGATTCTCTTGACACGGTTGAGATTGTGATGGGACTTGAGGAGGAATTTGGTATTACCGTGGAAGAAGAAAGTGCCCAGAGTATCACCACCGTTCAAGACGCTGCTGATATGATCGATAAGCTTCTTGAAACCAAGGCTTAAACTAGTAAAAAGGACAAGCATGTCCATTTTAGAGTTTTTTGCTATGTCGACGGAAGGGGTTTTTAATCTTTATCTTTGGTATTACAACTTGATTGTCTAAGTAACTGCTA…
Gma.1838.1.S1_s_at	BM270054	At2g44620	8e-41	Metabolism	Fatty Acid Biosynthesis		AAACTGCAGCCATGGCGTGCCATGTCATCACACGGCGACGATCATCTCTCCAAAGAGGAGGTCGTCGAAAGAGTCCTCGCCGTCGTCAAAGATTTCCCCAAAGTCGATCCTTCCAGGGTGAGTCCAGATGTACATTTCCAGAAGGATTTGGGTTTGGATAGCTTGGACAATGTGGAAATTGTAATGGCACTAGAAGAGGAGTTCAAGCTAGAGATCCCAGACAAGGAAGCTGATAAAATTGACTCTTGTCATCTTGCTATTGAGTACATTTCTAACCATCCCATGGCTGGTTAACTAATGTGTCCTTTTTCCTATTTGGCTTCATGTTGAACTTAAACANCAGTGCAACCTTGAACCTTCCCCTTACTTTCACTGGATGTTT
Gma.2139.1.S1_s_at	CF922475	At1g31812	2e-12	Metabolism			ATCCAACAAGCAGATCAATCTCTCTCTCTGTCTCCCAATCAAAACAGACATGGGTTTGAAGGAGGATTTTGAGCAGTATGCTGAGAAAGCAAAGACTTTGCCACCGACTCAATCAAACGAAGACTTGCTTATCCTTTATGGATTGTACAANCAGGCCACCGTTGGACCTGTCAACACCAGCCGTCNNGGNANTGTTCAACATGAGGGACAGAGCTAAATGGGATGCATGGAAGGCTGTTGAAGGGAAATCCAAGGACGAAGCAATGNGTGATTACATCANTAAGGTGAAACAGCTGCTGGAAGCAGNCNGGCNTGCCTGCTTGATAACATTGTCATGCCTTGCTTTCTNATTCTGTGCTAGNANGTTCNCAACAGTTTGGAAATAAACAATTGCAGTGT…
Gma.254.1.S1_at	AF404403.1	At4g16760	0	Metabolism			GAAGTTCTTTGCAGCATTTATGCTTTGTTTCTACTTCATAANCATCTGGGTGATTTTCTTTCCACTGGCTGCATTAACCCAAAACAAGGATCACTTGCNAGTGAGCAGCTGAGAAACTTNTATTCACAGGTNCGTCCTAATGCAATTGCGCTTGTTGATGCATTTAACTACACTGATCACTACCTTGGTTCAATTCTTGGACGTTACGATGGAAATGTGTATCCGAAGTTGTACGAGGAGGCATGGAAGGATCCTTTGAATGATTCAGTTGTTCCTGATGGCTTTAAAGAGTATATTCAACCGATGCTTAAGCAGCAACTACGTAATGCTAGGCTGTAGTTNATTTTGTGGCAATGATGCTTTTGGCATCTAAGAAATTTACCCAGACTATTCTGATTT…
GmaAffx.58465.1.S1_at	BU926190	At1g06290	0	Metabolism			AAACATTCATGGAGGCTGAGTCAACTGTACCTGCTGGTTCATTGAAGAATGTCTTGGGTCTATTGAGATCGTTGTATGCTGTGATATGT
Gma.7492.1.S1_at	AW597705	At3g22200	1e-130	Metabolism			ACAACAAGTCACCTAATGATCCATTTCCTCCTGAATGGGGAATAGGTGCCTATTTTGGAGCACAATGTGAGAAGCATGGGATGTTAGTTCGTGTTGCGGGAGATAACATCATGATGTCTCCACCATATATTATATCTCCTGGAGAAGTTGAAGAGTTAATCAGCATTTATGGGAAAGCTTTGAAAGAAACGGAAAAGAAGGTACAGGANCTCAAGTCTCAGCGCAAGTAGCTTAGGCCTNATGATGGAATAATAAACTNTGCTGCNNCNACNTCCGGGNGAAAAGGAAATATTNNNNGTANTAACTTGATAANACTTNGTTCCAACCTTTTCGTTATTGTAAATGTCNNTAAATTGNTTNCCTANTTGCNTCCTAATTNTATGTTGTNGTTANANANAN…
Gma.10580.2.S1_a_at	BM954800	At1g06570	2e-22	Metabolism			GGTGTGCAGCACCTTGCGCTTGTTACTCACGACATCTTCACCACACTGNNNNNNNANANNNNGANNNNNGNNNANNNNNNNTTNNNTNGNNNNNNNNNNNTNCATGCCTTCTCCTCCTCCCACCTATTACGCCAACCTCCACAACCGTGCCGCTGATGTGTTGACCGTTGACCAGATTAAGCAGTGTGAGGAGCT
Gma.5590.1.S1_a_at	BE822176	At1g22410	1e-130	Metabolism			GTTACCACACACACTGTGACCCAAGGCTCAATGCTTCACAATCTCTTGAGCTTGCTTTCATCATCGCNGAGCGTTTGAGAAAGAGCAGGATCAGATCGCAGCAACCTCTTGCCCCTCTAGGAGT
Gma.5590.1.S1_at	BE822176	At1g22410	1e-130	Metabolism			ACGAGGATGGGAGCTGAAAATATGAGGGTGAAGCTTCCACATCTCATCAGGGCAGTGCGCAGAGCAGGNCAAATTGTCACNTGGGTCAGTGATCCTATGCATGGAAACACCATTAAGGCTCCNTGTGGTCTTAAAACTCGCCCCTTCGATTNCATCAGGGCNGAAGTGAGAGCATTCTTNGANGTNCACGAGCAAGAAGGAAGCCACCCAGGAGGGGTTCATCTAGAGATGACGGGTCAGAATGTGACCGAGTGCATTGGTGGGTCAAGGACGGTCACATTTGATGACTTGAGCTCACGTTACCACACACACTGTGACCCAAGGCTCAATGCTTCACAATCTCTTGAGCTTGCTTTCATCATCGCNGAGCGTTTGAGAAAGAGCAGGATCAGATCGCAG…
Gma.3429.1.S1_at	BI974673	At5g09300	1e-170	Metabolism			GATGGAAATGATGCTCTTGCTGTTTATAGTGCAGTNCACACTGCTAGAGAAATCGCTATAANAGAAAAAAGGCCNGTTTTAATTGAGGCTCTCACTTATAGAGTNGGACATCACTCTACATCTGATGATTCAACTAAGTACCGGGGAACNGNTGAGATTGAATATTGGAAGANGGCAAGGAATCCNGTGAATNGNTTCAAAAGATGGGTAGAAAGGAATGNTTGGTGGAGTGACAAGGATGAATTGGAGCTTAGAAGCAGTGTNAGGAAGCAGTTAATGCATGCGATTCAGGTGGCAGAGAAAGCACAAAAACCTCCACTTNAGGACTTATTTANTGATGTCTATGANCAANTNCCATCAAACCTTCAGGAGCAAGAGAGACTANTTAGAAANACCATC…
GmaAffx.89783.1.S1_s_at	CK606640	At1g76490	6e-20	Metabolism			AAATTCTAGGCTACTGGCCACCATTGTAGCCGGTTCAGTCCTTGCCGGGGAGCTATCGCTCATGTCTGCTATTGCAGCTGGACAACTTGTTAAGAGCCACATGAAATACAACAGATCTAGCAGGGATATATCTACAATTGTCCAATGAACTGGCCACAGTACACTTAAACTTGTGTTAGAGACTAATATTCTAATAAGCAAACCATCAGATAAAGACAAAAATAACGAGAAAAAAAAATTGGTATTGATGATGGTGGGGGTAAAAGATAAAGTGATGGTTGGCATCTTCCATGGGCAAATCCAGCTCCCCAGAAGCGTGGGGTTGGTTGGCACTCATTGAATGTCTGCTTCGTGTGAGGCCTTTTCTCTTATGGAGA
GmaAffx.5528.1.S1_at	BE822015	At5g14200	3e-36	Metabolism			TGCTTCAACCGACATGCTTAACAACAGCACAATTACTCATNNACAGGACAAGGCAAATCCATTTGCCACTGTTCTTAGTGCTGCTATGCTTTTGAGATATGGCCTAGGAGAAGAAAAGGCAGCTGAAAGAATAGAGAATGCAGTGATGGACACTTTGAACAGGGGATTTCGAACTGGTGACATATATTCTGCTGGAACGAAGCTGGTAGGATGCAAACAGCTAGGTGAGGAGATACTGAAGTCAGTTGAATCTAACGTTCCTGCTGGTGCTGCTGCAGTGTGATTTTGAAACCAACTCGCCATAGCATTTTGGGTTCTGGTTTAGGTTGGAGGCCACTATGACTGCCAAAGCCGAGAAAGTCTCCCTAGTCTATTAAGTTCTGGCTTCCTTCTGTATCA…
Gma.1689.1.S1_s_at	AB007907.1	At3g02360	0	Metabolism			GCCAAAATCTGTAGTTATGCACAGGGAATGAATTTGATCCGTGCAAAGAGTATTGAAAAGGGTTGGGATTTGAAGTTGGGTGAACTGGCCCGGATTTGGAAAGGNGGTTGCATNATTAGAGCAATATTCTTAGACAGAATCAAGCANGCNTATGANAGAAACCCTAATCTGGCAAACCTTCTTGTGGATCCAGAGTTTGCAAAGGAAATAATNGATNNCCAATCTGCCTGGAGGAGAGTTGTTTGCCTTGCTATCAATTCTGGTATNAGCACTCCAGGTATGTCTGCTAGTCTTGCTTATTTTGACACTTACAGAAGGGAAAGGTTGCCAGCTAATTTGGTGCAAGCTCAACGAGACTACTTTGGTGCTCATACATATGAAAGGGTTGACATAGAGGGG…
Gma.2061.1.S1_s_at	AW348425	At5g41670	1e-88	Metabolism			GCTGGGATTAGTACTCCCGGAATGTGTGCCAGTCTTGCTTACTTTGATACCTATCGGAGGGCAAGGCTGCCGGCAAACCTTGTCCAGGCTCAGAGGGACTTGTTTGGGGCGCATACTTACGAGAGGGTTGATCGCCCTGG
Gma.12152.1.S1_at	BG650241	At1g74260	1e-125	Metabolism	Purine Base Biosynthesis		GGGTGGCAGCTATTTGTTCCCCAGATGGGAGGCATCTTGCCATGATGCCTCATCCTGAGCGTTGCTTCTTAATGTGGCAGTTCCCATGGTATCCAAAGCAGTGGGATGTGGAGAAGAAGGGGCCTAGTCCTTGGTTACGCATGTTCCAGAATGCAAGAGAGTGGTGTTCCTGAAATGATCAAATGTTTTTCTCATCTTGTCTTATCTTTTTCTTTNCTTTTTCCNNATATAAAGCACTTGTCCTTGCTTTAGTTGACAACTTATCCATGTCCTCCTTCAATAATTAATGGACAGGTTACTCATCAATAAC
GmaAffx.4650.1.S1_s_at	BF219531	At1g11930	9e-48	Metabolism			TGTTGAACCAGCTCTGTGTGTGGATCTTGTAAAACATATTACAAACTGCCCAAACCTTGAGTTCTCTGGCCTAATGACAATTGGCATGCTTGATTATTCATCCACCCCAGAAAATTTTGAGACACTATCCAATTGCAGAAGTGAAGTTTGTAAAGCTCTTGGAATATCAGAAACGCAGTGTGAGCTGTCCATGGGCATGACTGGAGACTTTGAACAAGCTATTGAGATGGGAAGTACAAATGTTAGGATTGGAACTGCCATATTTGGAGCCAGAGAATATCCACCGAAAGAAGAGTAGCTATCCTCATTTTGCAGTCTTGTTTGCGTCGGTATATTGGTGCTTGGATTC
Gma.7120.1.S1_at	BM093481	At2g38400	1e-176	Metabolism			GAGGCCTAATGCTAGGAGTTGAACTTGTCACTGATCGTGAACTTAAAACTCCAGCAAAANNTGAAACGCTGCATGTAATGGACCAAATGAAAGAATTAGGAGTACTTATTGGTAAGGGTGGTTACTATGGAAATGTCTTCAGAATTACACCCCCGTTGTGTTTCACCAAAGAAGATGCAGACTTTGTAGCAGACGCAATGGACTTGACCTTGTCTAGAATGTGAAGCTGAGCCAAGATCCTAGCTTTAATAAAAGTCTATTATATCATAAATGAAACTGTATTATCTCATCTCCATAGCTGGTAAAAATTACATAGATGCAGACTTATATAGCTAAAATAGCAGACCAATCTACTGTGATCTTAGGCTATGCATGAGCCAACAACTCGT
GmaAffx.92157.1.S1_at	CF807882	At1g23800	1e-108	Metabolism			GCTGGTGTTTTAAATGTAGTATCTGGCTTTGGTCCAACTGCTGGTGCTGCTCTTGCTAGCCACATGGAAGTTGACAAGCTTGCTTTTACTGGTTCCACTGATACTGGGAAAGTTGTCCTTGAACTGGCAGCTAAAAGCAATCTTAAGCCTGTTACTTTGGAACTTGGTGGGAAATCCCCCTTTATTGTGTGTGAAGATGCTGA
Gma.18066.1.S1_at	BG046123	At2g37770	7e-77	Metabolism			TGGCCAGTCCGCATGAAAAGTGGAACATTTGGACTCAATAAAGAATATCTTGAGCAACCAGACATTCCCAATACATGGAGAGCAATGGAGGCACTCTATGACTCAGACAAGGCTAGAGCCATAGGAGTGAGCAATTTCTCTTCAAAGAAGCTTCAAGATTTGTTAGATATAGCAAGAGTGGTTCCTGCTGTTAACCAAGTGGAATTGCACCCAGGATGGCAGCAGCCAAAGTTGCGCGCATTTTGTGAATCTAAAGAAATTCATCTATCTGTAAGTATGGCATATATGATATATACTTTCACTTAAAAGACTTGATATTCCTAAATTATCAAGAATTTAATGGTGATGCACTCACAATGTAAAGTAAGCTTGCATTGTCAACTAATTAAAACTGAGTGT…
Gma.9686.1.S1_at	CD394819	At1g59950	7e-67	Metabolism			GACCAAGCAGATTGCACAGGCTCATGGCAAAACTGCAGCTCAGGTATGTCTTAGATGGTTATTTGAGCAAGGTGTGACTTTNATACCAAAGAGCTACAATAAAGAGAGATTAAAGGAAAATTTAGAGATATTTGATTGGTCACTCACCAAAGATGACCATGAAAAGATTAATCAAGTCAAACAGGAGCGTATGTTCAAGTACGGAACAGCAGCATTCCCGCTTCCTGATCTATTTGATGGGGAAACTTAGTAATACATTATCAGCTTCAATATTCCATTTTCCTTGGGATTTAGGTTTCTCGTGTCTGTGACACAATAAAAGGATGAAGTGTAATCTGTCTTTAGAATACCCTTAAAGAAACTCAAAATTGAAATCACTGGTTTCACTTTTTGTGGGAA…
Gma.3557.2.S1_s_at	BI974043	At1g59960	2e-20	Metabolism			ACCACCTTAGTCTCTGAAGTCACTCTCCCCTCCTCCTCCGGCCAGCGGAAGATGCCGCTGATGGGCCTCGGCACCGCGCCGGAAGCAACCAGCGCGGTTACCACAAAAGATGCTGTTCTTGAGGCCATCAAGCAGGGCTACAGGCACTTTGATGCTGCTTCTGCTTATGGTGTGGAACAGTCTGTGGGAGAAGCCATAGCTGAAGCACTTAAGCAAGGACTAATTGCATCCAGAGATCAACTCTTCATCACTACCAAATTGTGGGTCACTGATAACCATGCCCATACTA
Gma.12012.1.S1_s_at	BU548282	At1g55740	1e-160	Metabolism			AAAGGATGCATCCATCCCAGTTACCTTGAAAACCAGAGAATATGAAGTTTTCACAATAGTTCCCGTGAAGGAATTGAGCAATGGTGTCGAATTTGCTCCTATTGGTTTAATAAAGATGTTCAATTCAGGAGGGGCTGTCAAAGAGTTTAATTGGGGATCTAATGAAAGTACAAATGTAGCCATGAAAGTCCGTGGTTGTGGCCAATTTGGTGCTTATTCATCAGCTCAGCCTAAGTTGATAACAGTTGACTCAGAAGAGGTAGAATTCAAGTATGAGGAAGAATCTGGATTGGTGACTATTGATTTGAGAGTACCTGAGAAAGAGTTATACCAATGGAGCATTTCTATTGATTTTTGAATCAGAGACTTTGTCTCAAGATGAAGGGGTTTAGAGTTATA…
Gma.6192.1.S1_s_at	AW396773	At3g57520	1e-105	Metabolism			ATGACTCAGAGACCGGGTTGACAACCTTCTCCATTCCAGTTTCTCCAGAGGAGATGTACAGATGGTCAATAGAGATCCAAGTTTGAGTCCTTTTTAAGACTTGGTGTTTGATGCATTGTTGTATCAGGAGAAGGGTTTTGTTGTAATTAAGCATTGAGGGAATTGTTGGAGTCAGGCAGAGAGAGAGGGGGGAGGTTTGTTGTAAGACACCNTAGTATTAGTATCATGTAGTGGAGAAAAAGGGTTGTTGATCCTAATAGCTAGACAAGGCATGTTGTAGTAGTCATGGGGTGGGGAAGTCCTTTTGTTGTAGCATGTAATTTGGTTTAGACTT
GmaAffx.87417.1.S1_at	BM568072	At3g57520	3e-66	Metabolism			AAAAGTCTATCACAGGGAGGTACACCTCCACGATTCCTCATCATAGATGATGGTTGGCAACAGATTGAAAATAAAGCAAAGGATGCTACTGAATGTTTGGTACAAGAAGGAGCACAGTTTGCTACTAGGTTGACTGGTATTAAAGAGAATACTAAATTTCAAAAGAAATTACAGAACAATGAGCAGATGTCAGGTCTGAAGCATCTAGTACATGGAGCAAAGCAGCATCACAATGTGAAAAATGTATATGTATGGCATGCACTAGCTGGTTATTGGGGTGGAGTGAAGCCAGCAGCAACCGGCATGGAACATTATGACACTGCCTTGGCATATCCAGTGCAGTCACCAGGCGTGCTA
GmaAffx.90600.1.S1_at	CF806325	At3g57520	1e-101	Metabolism			AGCAGATTATCATGCTGCAGCTCGTGCAATTGGTGGATGTCCTATTTATGTTAG
GmaAffx.90600.1.S1_s_at	CF806325	At3g57520	1e-101	Metabolism			GACAAGCCAGGCAATCACAATTTTGATCTTCTTAAGAAGCTGGTTCTCCCGGATGGTTCGGTTCTCCGTGCTCAGTTACCTGGCAGGCCAACTCGTGATTCTCTATTTGTGGATCCAGCCAGAGATAGGACTAGCTTGCTCAAAATATGGAACCTGAACAAATGCTCTGGAGTTGTTGGTGTATTTAACTGCCAAGGTGCTGGATGGTGCAAGATAGAGAAGAAAACCCGCATCCATGATACATCTCCTGGTACACTCACCGCCTCTGTCTGCGCCTCTGATGTTGACCTCATCACACAAGTAGCAGGTGCTGAATGGCTTGGAGATACAATTGTTTATGCTTACAGATCAGGTGAGGTGATTCGGCTACCAAAAGGGGTTTCAATTCCAGTGACACTA…
Gma.7812.1.S1_at	AI443507	At4g34740	3e-11	Metabolism	Purine Base Biosynthesis		CAATAATCCTCTATTTCTATTTCTGGTTTTTGCAGCATAAGGCATCTCTCAGTGGACAAAAATCAGATGCAGTTCTTCAGGTGTTTTTGGTGTTGTTCTTCATTTCAATTGAAGTTTTACCTTGATGATTCGCACAATAATATTGTTTTACATTATAGGTCAATATAAATTCTCGAAGTAAAACTCTAATTCTGACTCAAGAAAGTACTAGAAGTACTTAAGAAACTGTATCTAAATCTTGTCCCATTTGATAGTTTAAGCCTAACCGTACTACTACCTATGTTGTGATGTGATGATGTGATGCGGGGAGGGGAAATACTGTCAAAGCATCCAGCTCCACTGGTGAGCTTCATTGGTTCATTTGGATTCTGAAGGCCGGTGATGCTTTTGTCATCTGAT…
Gma.8020.2.S1_a_at	BG789780	At1g13280	4e-58	Metabolism			CTTGCAACAAGTTCACAATTTAACCACCTGTTACTTGT
Gma.8020.2.S1_at	BG789780	At1g13280	4e-58	Metabolism			GACTCAATGAGGATCCACATTTTTTTTGTTTCTTTTTTAAGGAAAAAATTCGGTTACAGTTTCTTAGGTGTTGTTCTCTAGTCAGAATTGGAGTTTTATTTCGACAATTTACGTAATAAAAGTTTTCATTAAAGGTTTATACAGATTGTCGAAGTGAGGCTTAATTTTCATAGAAGAACAGCACAAATTAAAAACTGTTTAAGTTTTCTCCTTAATTTTTATTTTTTTTAATTCTCTTCATTGTTGGCTTGGTTTGGAGACACTTGCAACAAGTTCACAATTTAACCACCTGTTACTTGTATTGAAATTTATTAATGTAGTAATTGTGGGTCAAGATGTCAGGTAGTAGTAGTAGAGTTTTTTATGTTGTTGAATAATGAAAGTGACAAGTGAGGTTGG…
GmaAffx.91821.1.S1_s_at	CF807546	At1g80360	1e-106	Metabolism			GGTATTCCTGAACTCAGAGCAGCATTAGTCAAAAAGTTGCGTGATGAAAATAATTTGCACAAATCTTCAGTAATGGTTACATCAGGTGCCAATCAGGCATTTGTGAATCTAGTTCTTACTCTCTGTGATCCGGGTGATTCNGTGGTTATGTTTGCTCCTTACTACTTCAATGCNTACATGTCCTTCCAGATGACTGGCNTTACCAATATTCTAGTTGGTCCTGGTAGCTCAGACACACTCCATCCTGATGCAGATTGGTTGGAAAGAATATTATCAGAAANTAAACCNNCTCCAAAGCTTGTTACTGTTGTAAATCCAGGCAATCCATCTGGAACTTACATTCCAGAGCCCCTTCTAAAGAGGATTTCAGATCTCTGCAAGAATGCTGGCTCTTGGCTT…
GmaAffx.27805.1.A1_at	BI892863	At2g22250	1e-40	Metabolism			GGATTTCTTGGTTGAAAGCTTTAGAGAAATGGATGGTGTGAAAATATCTGAACCACAGGGAGCATTTTATCTATTCATTGATTTCAGCTCCTATTATGGAAGAGAAGTTGAAGGGTTCGGTATAATTGAGAATTCTGACTCCCTCTGTCGATACCTGCTGGACAAGGGCCTGGTTGCCTTGGTGCCGGGGAGTGCATTTGGAGATGATTCTTGCATCCGCATCTCTTATGCCGAATCCCTTACTAATTTAAAGACAGCCGTGGAGAGGATTAAGAAAGCACTTATCCCTCTAATTAGCTCTG
Gma.3605.1.S1_at	CD396645	At1g55810	1e-144	Metabolism			GTTACTGTTGGACCCTATACTTGGCACAGGGAATTCGGCTGTTCAAGCAATTTCTTTACTCATAAAAAAGGGTGTACCTGAGTCCAACATTATATTNCTTAATCTCATATCTGCACCTAAAGGTGTGCATGTGGTATGCAAAAGTTTTCCAAGAATAAAGATAGTGACATCGGAGATTGAGATTGGTTTGAATGAAGATTTCCGTGTCATACCTGGCATGGGCGAGTTTGGAGATCGGTACTTTGGAACAGATGATGATGATGAGCAAGTGGTAGTTTCTTCCCAGTAGTTATTGTAGGGCAGAAGCAGAATCCACAATAATTTCAGTTGTTCATCGTTACCAGTGAGACTTCCTCTCGAAAATAGGTTTAAATTTGTTTTATCACTTCGTGTTG
GmaAffx.93267.1.S1_s_at	CF808992	At2g26230	4e-61	Metabolism			GCGTGGGCATCACTCTCTTCTCAGACTGCGTCAACTCGTATCTCCGCGATGACAACTCTGACATCGTTGCTACTGATACCATGAAAAACACAGTGTATGCAAAAGCAAAGGAATGCTCAGACATACTTTCTGCTGAGGACTTTGCTATTTTGCTTGCT
Gma.8220.1.S1_at	BE821328	At5g40850	5e-64	Metabolism			GTAAGCACGCTATCTGATGTTTATGGAAATGTAGAACTTCTGCCCTGCTTTTGGGCTATCTATTGGAGTGTTTGGCATGGGCAGAGCTGTTTCAGAACCAATTTTGATTTTCCATGTTCCAGATTGGGAATAAAACAAAGTAATACACAGATTTACTCATTTTTATAAANAAAAACACAGGTTTCGACTGCCGCAGTTATCTAAGTCAGGTAACTTGTTCCTTAGCCATTGGAGAAAATTTGTTCCATATGCTATTTAGCATCTTTCTTTCAGGAAGAAATATGGAGATGAGTGTCATGTCTGTGATTTCACGTGTTCAATTTATCAATGTTGCTATTCAGAGCCATTGATTCTATTTTTCATTCATGTTTTCTTGTAACTTGATGTTAGAGATACTGC…
Gma.6257.2.S1_a_at	BE658112	At5g17310	1e-58	Metabolism			GGCTATTGGGATTAATGTTCCTCGATCACGATTCCTTCCTGTGAAGGCAACTTCAGATTTGNTTCTTGTCCAGTCTGACCTCTACACTTTGGAAGACGGATTTGTCATTCGGAACAAAGCNAGGGAAAATCCTGAAAACCCTTCTATTGAACTGGGACCAGAATTTAAGAAGGTTAGCAACTTCTTGGGCCGCTTCAAGTCAATTCC
Gma.10015.1.S1_at	BI469759		0	No Homology to Known Proteins			GACTTTGGGAGTTGAGTGTTTTCACTCTGCTCGGTGTGGGATCATAACTGCGTGACGACCACGTGGGGATGAATACTTCAGTCGTGAATGAAGAAACAGTTGATGTTGGTTAAGGCCCACGGAGGATTCGAGTTCAAGATGGATTCAATGTGTCCCCTAACAACATATTCTATGTTTCATTTTTGTTTTGTTATTTTTTATTCTTTTGCGGGGAAGCGTAAGTTTAGATTTTTATATTCTGTCTTTCACAGGAGAAATTTTGATGTAGTAGTATATACTTTTACGATATCAAGCGTGGCNAATTCCATTTAGCCAGCGAACATAATATTTCTAGCATCTGCAGGTAAT
Gma.10075.1.S1_at	CA852124		0	No Homology to Known Proteins			ACACTTATACTATCTTGCGTAATATGCAAACTATGTTTGCTCTTTTTAAGTTGTTTTGTGTAATAAAGTTGCCTTTTTATTTGAGTGAGGAGTGATACATTTGTACANNNTCTTATGCTTCACATGGGATCGATTTCATTCCCAACTAACTCCCTTTGTCTGTGAAGGGCTGTGCTACTTCTAGAGCGTGCCTAACATGTAAACTCCTATTCAATGGAGGCATTACTTAATATTCAAACATCCGACAATCTATTTCTTT
Gma.10198.1.A1_at	AW310213		0	No Homology to Known Proteins			CAAGTTAAATGTAGCCTGTCACAGAAAAGTTCTGTGTTGTCATCAAGTTAAAAATCTCAAGTTCAGATGCTAGGCAATAATTTTGATAGACTATATTTGGAAATTTACCGAAAGTGGTTGTTTTTTCTCCTTCTGTATTTTGGAGCATATTTATCATGTATTCATTTGCTGATGATGGTAGTGCCATAACTCTAATTCACGAGAAAGCCCTACCTCTTATCTATTTAACACACCTATTACATGTTATTTCTTGTACGTTTCTGGACATGGTTCTTTGTATTTCCAAT
Gma.1034.3.S1_at	CD404242		0	No Homology to Known Proteins			GTCTTCTCTTTGTTAGTCTGTTTTATATTTTATGATGCTTGTTTTTACCTCCTTGGATATGTTAACTGTGACATCGGAGAGGCATGAAGGCTGTCGGATCAATTTGATAAGGGAACTTGTGGATTTTAAATTCTGTTGTTTGTGGAACTTTTGCAGATCACGGTCCAGGTCCAGGTCCCCATTGCCTCCGCGTAATAAAAGCCCCAAAAAGCGCAGTGCTAGCAGGAGTCCGAGTAGGAGTAGGAGCAAGAGCAAGAGTTTGTCCCGGTAACCTCTGATTGTTACAATTGATGAAGTTGTGGATGATGGTGAGGGAGGGCTACCAAGTTTTTTCTAGTAAAATTGACATTAGCCAAAAAAAACATTTGGGTTTTATGTTTGATCTCCTTTTATTGAACT…
Gma.10377.1.A1_s_at	CD409364		0	No Homology to Known Proteins			GAAAAATCTGCTGTTTATCTTCATTTCCTTTTGGATTTTGGGCTTGTATAATCTTTGTTGCACTTTTGGTTTGTTTGCTTTTGGGAAGTGGTTTGAATCCATTGCAATCATACAGAAGCTATGCTGCGCTACAACTGTTGTATCATGTGTGAACCTGTTGTCCCTGTAGGA
Gma.10384.1.S1_at	BE658298		0	No Homology to Known Proteins			CAGCTCCTAGGGTCACGTCAAAGATTCTGTATTTAGTTGTTGAGTGATTGAGTTCAATTTGTTGAGAAACTCAGATGCAAGGGTCAAGAAATTGCAATAGTTGACATTTGAAGAATTTTAATGCTGAGGTTGAGTATCAGGGGCTACTTGCAACAAAATGTTTAAAATTTATGATTGCAACAAAATGTATCACTAGGATTNNNTTNNGNNNNNGATAATATGATCTGATGTACAAATTTTCATGGGATAAAAGTTTTGTCAGGCTGTCCCGAATGAACGTTTTATGAGTCACGCTAGCTGAACAGTTCCTCAAGTTNTATTTGAGACTTCTTATTTGGTTAAAACTTGTCAAATTTCCTGATTGATGATGGGGTTTTCATTGCTTGCAAATTTAAGACT…
Gma.10664.2.S1_at	BQ081617		0	No Homology to Known Proteins			TTGCCTTTTTCTCTGATGTAAAAATTATCACTTCTCCTTTTGTGAAAGAGATTGTGACAACTTTGGCTATAAAGGGGGGCCCCTCTTCCCCTCTATTTTTTCTACTTGACGGATGGCACAGTANNNTAACACCACGCTTGTGGGAAACACTGATTTTTGTGCTGTGGTTTAGTGCTATATTATTGTTATTGTTGTGTATCGTAATTGGTGTAGTAGTGTATATGGACTTAT
Gma.10706.2.S1_at	BI968467		0	No Homology to Known Proteins			ACTCCCTAAGTTGCCTCCACTCAAGCCACTTCCACC
Gma.10850.1.S1_at	BI788127		0	No Homology to Known Proteins			GAACCTTCGTAGCCATGGCCTTGGTGGCTTAAGATCTTTCATGAGAACAATTGTCTTTGATTCGTCCCACGTGGTGGCATTTCCGCCCTTGATCTTTCTTTT
Gma.10888.2.A1_at	AI748644		0	No Homology to Known Proteins			TTCACTTGAGTTCTCTTGATGTTGTTGTGATTCGTGAAGGCTGTGAAAATGCATGTGTGTCCATTGGGTACGT
Gma.10888.2.A1_s_at	AI748644		0	No Homology to Known Proteins			ATGTGCACGTGGGAATTTGAATTTGGAGTGCACGATGAGCCACATTCAAAGGGATAGAATAATGGTTCTTTTTCTTATATGTTGATTTGGAGTGGGGTAGTGTAATTTGTTGGGGCGCCACTAGTTGGAATAGGGCCCCCGAGTGTTAGAGTTCGTGTTTGTTTTAGCTTAGCAATTTGGC
Gma.10920.1.S1_at	BQ612383		0	No Homology to Known Proteins			GTGACTGGATGTACATCGAACCCGAATATACCTTGCTATCCGCCACCAAAACGAGCATGTCCTATATATATTCGTAATTGCTGACGAAAATTATATGTTTCTGGACTCTAAAGTTTCACTCAAATCGAGGGGAGAAGCAATTAATGTCATGCTGCTATATATATATATATATAGTTTTTATTTGGTGCCTCATCTTTTTAACACTATTCCTGTGTTAAAACTCGGTGGTGTCACATCTTTGCTTTAAAATTCCGTGTTCTTTTCCAGTTTGCAGTTGCAATAATCTTCTAATGTTGTACTGAGGCAAAGGCTTGCCCTTTTAGCCACTCAATAAATA
Gma.10921.1.S1_s_at	BQ611250		0	No Homology to Known Proteins			GATTGTTTGAACGTGTGCAAATGTATGCATCAGTAGCTTTGGTTTTTTATTTTTTATTTTTATGTTTAATTATTNACCAAGTTTTAAGGAGTTTGTTGTTAGGTTGTCTGATTGTTATGTGTGAGTAACTTAGCAGCTTAAGCTTAGTTGCTGAAGTTTAGCTAGT
Gma.10932.1.S1_at	BQ612822		0	No Homology to Known Proteins			TTTCTGGCTCCAACGGGCTTCGTGGGTTGGGCTTAGGAAGGCTTGTGCTTGTAATTTTGGGTCTAGTTTTGGTTCTGATGTAAAAGGGTTTCATTTGGTCTTGCTTTATTTATTATTACCATTACCATATGCCTAATAGGTTGTTTTGGGTTGAGGGGGGTGTAGGTAAAGTCACACTCTCCATGTCAACAATGTTGTATGTGAACTGGCCTTAAGTTTTTAGTTTATAGTTTAAGCTATGACAAATGAAATTGTCTTAATTTGTGCTTTTTCGCTGGCCAAGACTTTCTTTTCTTGTTTGGGGATGGTGGAAAACAATGCGACCAAGGATCTGTTCGTTTGAATTGAA
Gma.10981.1.S1_at	BM092081		0	No Homology to Known Proteins			AGCTGCTTGATCAAGTGTTTGTTGCTTATCATGTATATGTTAAGTTAGATGTTGCCTCTCTGTTTAGTTCTTTGTGAGATTTACTTGTATTTTTGGTATTATTTGAAGCGTTCAGTGTTGCAGCCATGTTTCTGCAGTTTTGATGTAGTGTTTACCCCCTGTAACCTGTATAATTTTGCTACGTTNGGTAGGTTAAGTTAGATATGTTTTCTTTGTTTAAAGACTCGTAAAAATCACAAT
Gma.11045.1.A1_at	AW100774		0	No Homology to Known Proteins			CTTTATTTTGCTTATCAACTGCTGTAAGAATTTTTATTATATTTTGTAAGTTAGTTTTTGCCCAAAGCGGTTATTTTGATATGCTTATTCAGCCTTCTACAGTGTGTTGGCTTTCCTCACTGTACTATGATAGCATG
Gma.11130.3.A1_at	BQ453096		0	No Homology to Known Proteins			TGTTCACCTAACCTACACTACAAGAAATGAAGAAAGCAGCATGAAAAATGCCAGAAGTATTCTGTTTAGTCCATTGGAGGCTACACAGGCATTTGGAATGGAGATTGTTGATCATCCTTCCTTAAGTCTCGCTCGCCTAACTAGGATGAGTTTTGTTTATTCTTTTTTNTTTTTTTTGCTGCAAATAGCAGGATTAGTGAAGTACTTAAAGTGTTACAAACCCCATCTAACGTCTTTCATTTATTTATTTTGGGAGTACAATTGGAAATGTTCAGAGAATGGAGAAGCAGTGGCTATCGAATGTATAAAAACACTAACTTCTGTTCA
Gma.11211.1.S1_s_at	AI442578		0	No Homology to Known Proteins			ATGGCCTCCGTTCAGTGCCACAAAACCTGCAAAGTGAGCTGCCAACAGGAAAACCAGCACGCCTCGTTTGGGCAGAAAGTTTCTGACTTGTTCAAAGGGCATCAACATAATGACCACAGCTCCAATTATGCCACCCAAACCAAAGTGCTTTCCCAGTCAGGGTCAGGGTTAGGCCCCTTCACCACCAAAACTCAAACACAATGCGGTTGCCCCCAAACACATCTCAGTACCACTCATGGCTCCAACACAAAAGGCCATGGCCATGGCCAAGGGAGAATTAAGAGGGAGCACAAGAGAGGGATGCTGCAGAACATCAAGGATCGCTTATCAGGTGACACCAGCAGCGACAGCNNNNNNNNNGAGAGCGACAACGAAACTTGCCACAAG
Gma.11229.1.S1_s_at	AI443813		0	No Homology to Known Proteins			AGGGTACTCAAAGATTTTTGCAACGCTTGGANTTGTATGCAAGTGTTGTGATGGGGTTGGAGGNGCCTGCACTAGTANATGGACAGAATCTTGCAATAACNTNCANTGTTTNCCTTGGAAATCACACTAGTTAATTATTTTCTGTATCTTTCCTTGT
Gma.11298.2.S1_at	CD415329		0	No Homology to Known Proteins			ACCTCGATTACCATATCCTGCATTTTTCTTGACAAGTGTACATTAAATTACACATGTCAATATGGTTTTATGTTGTTACCCCATTGCCACATTGTGTGTTTTGTTGTTGGTCAACCTTAGCTGCTCGACTTGCTNCAACNTGAAACAAGCAATGCAATTGNAGGAGCAGGTGCAGAAGTGTCATCCATTGTTTTCTTCCCTTNTCAATTNTTTTCCTTTTTCGTTCTTTGGTCCTTCCCAGCTCATCTCATCTCATCAACCTTTGTCCNCCCCCCACCANTTCATATGCATATTTTTCCAAATGTCAAATCATGTCTCCTTACATATTGTTCAGTCTTTTTCAGTTTTATAGGATTTGAATTGAATGAGCCCAAATATATATATATATATATATATATA…
Gma.1132.1.A1_at	BQ253380		0	No Homology to Known Proteins			GAAGAACTTCACTATCATAGTTGAGGAAGTTAGAGATTGCTGAAGCTGCTTTGAGGATTTGTTAATAAGCATTATTTGTCTCCAACTTCACCGTACCAGTAGAAAAGGGAAAGCATTCGCTTTTTGAAGGACTTAGTCTGTGTATGCTGACTCAGATGATAGTTAGTTTAAGCTGTGGGTGGTGAGAACCCTATCACCAGACTGATATAAGCGAATATGCGTCCCCCTTATGTTTTCTCAGATGTGTTTCTGTAGCTCCTGACTTTTGAATTTTTTTTTTAGTTAGCAATTGCTACATGGTTAATAAATGCCAGAATATGCATGGACCATATAATTAACTTGCATACTGGGGTTGTGTTTATCCATTTCATTTTCTGAATGTAGAATGATCAATTGAGT…
Gma.11500.1.S1_at	BE058294		0	No Homology to Known Proteins			ATTCTAAGCTTTACGTATTCGGATTTATAGCCTTTTGTATTTTCTGTATTCGATTGAACTTTCTTCACTTATTCTCTTTGTATTGCTGCCTTGGGAGAACCAGATTAATGCACAG
Gma.11646.1.S1_at	BG652019		0	No Homology to Known Proteins			GAACCCGAGACAATGCGATGGACGATAATAAGTGGTTGGTTGGGTTGGGGTTGAAAAATCACGTGGTGGTGGAACCCATTTGTCGTCAAACTTAGCAGTTGGTATGTGGGGTGGGGCTCATCAAAGCACTGCTCCTTTCCATCTAACTTCACATTTCTCTCGTGCANGTTTATGGTGTCGGTGGATCATATTATTATATTTTTAGTAAANGNATTTTGGGGATAGCTTCTGCCTCTCAATTCTCATCTCTCGGCAATAAAGTTTCAATTGTTTCTGTTTGGCGAGCCTTGGTTTAATATGCGTCAAAGTTTNTATGTCTTAGATAGTTATCTTCTTTACAATACCCAACCAAAAGGGATTACATGTATACCTTTTCTCTGCCTACTGGAAGTATCTAAC…
Gma.11933.1.S1_s_at	BU082906		0	No Homology to Known Proteins			TTTTCGGGTTCGAGAAGGCACTTGTNTTGTTTNTCGTACGAAATGGAGACTAAACNGAGTTCGGTGANGGTTACGCTCAGTTACGGCGCGTTGACGTGCGCCGCGGAANTTCTCGCGACTTTGCTAGCTTCTGCTGTCGTCAAAGCCNCGCTTTTGGCCCCGGATCTCTACCGGCTGCTATTGANCAACACGCCTACNNCCAAAGGAGAGAGNAAAANTCAGAGTNAAGACAAGCAACGTGATGCAGAGGG
Gma.12030.1.S1_at	CD399012		0	No Homology to Known Proteins			AGAGAGAGTTTCTGATAGGCGCCCCCAAGTTANNANCAATGCTCCAAGAAGACAACTACGAAGATAGTCATTGTCACCTATTGGTAACATCTCTTCTAGAATCATAAGCATTTGGCCCGCTTCAANNNNNNNTCTTTCATGAGAAATACTTCACAACTTTCTTTGCTGCTGACTTCAGTGTAAATGAATGGCTTGAGACATGGTCGAATCTTCAGAAAGTAATGTTCTCTCAAAATATTCTCATAATTATTTGTCAAGAGTCTGAAAAAGCAANGCACTTCATGGGATTAACATGGCCA
Gma.12193.1.A1_at	CD412873		0	No Homology to Known Proteins			GAGCTAACCTTCAGCTTTTCTTTGAGTGGCTGTGTGGTTGTATAGGTANNNGCTTTATATCCCCCCTTTCTCCTTTTTGCAGTTGATATTTGTAATACGCAGATAGTGTGATTGTGTCCTCTCATCTCAGGTTTGTTAATATCTTTGTAA
Gma.12242.1.A1_s_at	AW310746		0	No Homology to Known Proteins			GAACTGTGGAGTCAGCAGTTTCTCCAGGTCTTAGTTCACAGCTTATTGTTTGGTGCTTTGGGGCTATCCTTTTGGAGGAAAGTGCCCATTNTTGCCAAGACTGTGTTGTCNCCTTCCTCCCCTTTCCCTTTTGTGGGCTCCTTTTATAGTCTCCATGTATGTGCCAACTTATTGTTTCATGGATACAACTCTGTAATATTTTGNTACCTGTCACATAGACGGGTATGTAGGGTCGCCAATTGCTTTATTGGTAATTTTTGGTGAGGGATGATATAAAAAATTTTGTTTTTTTTACATCCTTTTTCAGTCATTATTTTTGGGTTGAGAGTATAGTCCATGAGTATTGATGAAGGCAT
Gma.12351.1.S1_s_at	BG651436		0	No Homology to Known Proteins			GGCGGTGTTGGTGCAGGGTCGGAATTTGGCAGCAGTGGCCAATTAGATAGCAAAACAAGCAGCAATGGAGATGAGGGTTTTGGGGATTACAGGGATGACAACGATGCAGATAATTTTGCCAAGAGGGCTTGATGGAATTTTATAGTTTTTTGTTTTCTGCTGCTCGTGTTCTGTATCCTACCTAAATCTCTTTGGACTTCAACCTGATAAGCATTTCATGCATGTTA
Gma.12410.1.A1_at	CD391850		0	No Homology to Known Proteins			GGAGAAATCTCCTTCCATATAATTGTTTGCACTCATGGCGTTGGGAAGGGAATGCGATTTGAACAGAGATTGCCTCAGGATTAACAGCCCAAGTATGNNNNNANTCAATGTTTCATAAGTATGGCTTCTCACCAAAAGGAAAGGTGCAACTCGAATGCACAAGCTCAAAGCTGAATCACGTTTCTGATAGAGAAATCGAATGATATGCCTTGACTCCNACTTAGTAAACATGTAGATATGCNATGTGGTTAAAGAAAGGCTTTTTAGTAATTTTATTGCATGATTTGGCTGACACGTTATTCTTTTTCCAGTGCAATGGTGAACACATCACACAT
Gma.12505.1.S1_s_at	CD394519		0	No Homology to Known Proteins			ATGGTCGTGCTGTGGTTGTGGTTATGGCAATGGCAATGACAACTACAGAAAATTGCAGTGAGGTCCATTTTTTTANAAATCTTGGTGATGTTGATGTTGGTTACTTTTCCTAATTCTTACTACTGCTACTTGATATTCATTCATCTGCTACCACACCACTATACTCTTTGCTTTGCAGTTGCGTATGATCATGAT
Gma.12555.1.A1_at	CD391198		0	No Homology to Known Proteins			AAGTCGAAACCCAATGCTACCAAGAAAGATGATATCAAATACAGACCAGACCACTTTTTCAGGTCAGCTTCCACCAGAGAATTTAGATACTTAAAAAGGGAGGAACGTTTACTCTTGGAAATTGATGATTAGGCTAATACGAGAATATGTAAAGGCCCATATGGTTGTTTTTTATTTTAGTCTTTGATGTATTCTGAAAAGCTCTACACATTCTTTCGCACTCTTGGTGTGGTCTGATTTGTCAACCCATTCTCCTAA
Gma.12687.1.A1_at	CD394817		0	No Homology to Known Proteins			TCGCACATTGATGTCCATGAGGTGATTGGAATTCTCATTCACAGGGCAGAGCCAGAGAGCAAGGGGTATTAGAGTCATTTTATTCTGGACTGAGTTGATTCGCTTCGCTTGCGTCTTAGGGCTTGAAGGAGCAAGTTATATTCTCTAGTTTGTTTTTATTTTCTTTCTAACTTTCTTGTTAGAGGTTGTTTTTTGATTAGGTAGTGTTGGTTGATAGATATATCCGTCATTCTTGTGATGGTTAGTGATTCCCAGCACCTGTTGTACA
Gma.12721.1.A1_at	CD395611		0	No Homology to Known Proteins			CCTCCATCTGCCGTAGTAGTCATATCTGGTTGGACCAGGATTGTCTCCATTGAGTCTTTTACCCAAAGTCCCACATCCTTTCAAAAGTTCAATTCCT
Gma.12826.1.A1_at	CD391629		0	No Homology to Known Proteins			CATGTCTGGTGGCTTTAACTTGGTGCCTTCATTGAATCCGGATCTACTTCTGTAGCATATATAATTATACACGTTCATTTGTCAAGTATTAGACTGAATCAGTTCATAGTTTTCAAGTGTAGTCAAGGATGAGATCTGCTGCAAACTTCTTATTGTTCATTACTGCTCCTTGCAAGAACAGATGTTCTTTCCTGTGACATTCATTTGCTGAAACTTTATTCTGCTATTCTTGTTGCCATTTTTTTAAAAGTAGTTACTGTTATTTAGTTCTCAAATTCTCATGTATCACAAAACTATAGTTTATTTGTTCCACTAGCAGAAATTCCAGCTGCATTTGTTGTTATGTGTGGGGAGAATAGTCACATGCTTGTGACAAGTATGTTACGGATATTTTGTACC…
Gma.12892.1.A1_at	CD394551		0	No Homology to Known Proteins			GCAATAGCATGAGAATATGAGATCATGGATTTTGAAAGGACCCAATGGAAGCCNATTTATTATGTCTTTTTGGNTTGTCTTTTGGGAAGTACGTATGTGTATGTATGGGTTTGGTTTTATATATGTAGTATCCTGATCAAGTTTCNANTTGTTTTTTCTTCTTTGTTGAGATATTGTAATGTACTGATGCTATCCTTTCACCAACTTGAATGTACAAGTGATCTTGTTACTGATCCTATCCTTTGTTGAATCAATG
Gma.1295.1.S1_at	CD397377		0	No Homology to Known Proteins			AGTTTCAGCAAAATTCACCAATGGCTTTCTCCAAAGCATTGTTCCTCGCCGTCGTAATGTCGGTGTTCGTCGCCGTCATCTCCGCCGCTGAAGCTCCGGCTCCGAGCCCTACCTCTCCCGCTGCCGCCGTGTCGCCGTCATTCGTCGCCGGTGTTCTCGCCGCCGGAGCCGCTCTCGCGTTCGGATCTACACTCCGGATCTGAGCGTAGCTCATGGATTTTATTTGTGGATTTTTAGTAGAAGCCGAGATTTGAGTAGCATTAGTATATAATTCTCTCTATTGATATTGCTATGTAGCGATTATTGCTAGATATGTTGATTTCTGGATCTATATTGCTTTTATGGTTTGACTAGTATTCTTATTGTTGTTATCATTGGTTCTAGTACAT
Gma.13100.2.A1_at	CD401239		0	No Homology to Known Proteins			TAGTAGTAGACATCACCCTCAGCCCACTAGATGGAGATAACTGAAAAGCAATGTGCCATATTATTTTTCTTCCTGGTAGTTTGCCAATATATATTTTTACTTGAATGATGAAAGAAGCAATTAGTTTTCCCCCCATATTTGCATAATGTCCCCAGTTGT
Gma.13218.1.A1_s_at	CD391892		0	No Homology to Known Proteins			TTTACCAATATATGGCAATGGAGCCTTTTCAGTTTATCAAGTACTTTTATTGCTGAGAAAAAAAAGTACTTTAATTGATGTGTTTGCGATTTCAGTGTATCATTAGTATGTACTTACTAGTAGAAAAACTGAAGATATGCTGTTGCATTGTGTTGT
Gma.13244.1.S1_at	CD395627		0	No Homology to Known Proteins			GGCCTGGATTTGTTCTTCGCTGGGCTTTAAAATGTTGTTGGGNANNNGNGTTTTGTTTAATGGTTATGTATATTATCTTCTGCTCGGTAATGCNNAGACTTACTCNNAGTTTCTTCTATTATTCTAATTTCTACTAATAATTGCATCCTAGTTAGTGTGAATNTGAAGTAAATTTAGTGAATGACNAATGGTTATATGAATTTCGTGTGTTGAATACTTTCTATTTGGATTNTCGTTGTATGTGATAATTCGGCTACTGTGGATTAAGTTGAAGTTCAAGCTAAGCGTTCTTGGCCA
Gma.13337.1.S1_at	CD412716		0	No Homology to Known Proteins			TGGTTTTGGTGATTGCCATGTTGGCGATGGTAGCAACTGGGGTTTCAGCTGCTGAGGCACCTGCCCCAGGTCCTTCATCCGATGCCACCNCCTTCTTTGTACCCACTGCTCTTGCTTCTCTCTTTGTTCTTGCATTTGGCCTTCTCTTCTAATTAATTCTTCAACAACCTTTGGTTATTTGTTACATTACATATATGGAATTCACTTTGTTCAGAGGTGGTTGTGTTTTGTGTTTCGTTCTTCTCTTTTTTTCCAACTCAGCTTG
Gma.13373.1.A1_at	CD398686		0	No Homology to Known Proteins			GTGTTTTTGACGGACGAGTTGCAACAATATTCTGATTTGCTGGTAGTCATATGCATCGGGGCCATTATCGTGGAAGTTTTGCTGCCTTGTATCGCTATCCATGCAAAGTGAGGGGTTTTTCTGAGAAGCNATTAGTCCGGTTGAATTATATTGACANCNGTGAGTATNTTATTTGGGGGCACCCAAGTTGTTAAGGAACATAAATAGCAAGATTTTCTCACCTTTGGATCTTTTAGTAGTTTGCTTCGACGATCAACTCCCTTTTGCCCCAGATCTGTTGAGACATTTGTTTCATCATCTGTGCCTCTGGTTGCTGTCTTTCAGTGAAA
Gma.13428.1.A1_at	CD397879		0	No Homology to Known Proteins			GGATAATTTCATAATGTCTCCCTTTTTTGTTCGATATGTATGAAACCCTGTTGGGCATGCTAAATGCCCTGTTCTCTTTGGGCTCTCTGTTGCAAACCATCTGACACAGACTTGGGTGTATTTCTGGCCAACTCACAGGCTATAACCTTTGTCACTCTGGCACACTGTTGTATGGTCTGTATTATGTTCACGTCAAAGAGATCTTTTATATTACTGACTCTTGTTTGGCTTAAA
Gma.1358.1.S1_at	BQ295834		0	No Homology to Known Proteins			TTCTCCTGACAACTAATATCAGCTCAGTATTTGTACAGATCTCCAAAACAAAAAGAAAAAAAGGAAGAAAAAGAACAATTGCATTGTGATTCTTTGCTATTAGATTTATTGCAAAATGCTGCAGTAGTTCAAGACAAGCATATGATTGGTCGGATCTCTGCCAGTGGCAAGTAACGACGTTTGGCTGAATTAGTTATGTACATTGTTTATGAGTTGATTTGTGTAAAGCATTTACTTATTCAATGGTAGTTGCTTTGTCATGTTTTTTACATGCACAAAAGATGTTTTCCCTGATCTCTCCTATCATTTGGTAACTTTGGTTACACAGTTACTTTTCCACT
Gma.13580.3.S1_at	BI973761		0	No Homology to Known Proteins			TACACCACCCTGCATAGTTTGTTCAGCTATAATACTACTTGAGCTTCTTTACCTACTTTTCAAACCTACATTGCACACAAAATGGCAACATCTTGGTCATGTTATCTACTTGCATTGCTTCTTTTTATGTCAACTATTGTATCAGAGAGTAGAGTGGCAAGGAAGGACTTGGGCCTGGACCTTGGTGGGTTGGGGGTTGGACTTGGACTGGGTTTGGGCCTGGGNATAGGAGGTGGCAGTGGCTCTGGAGCTGGTGCCGGAGCAGGGTCTGGTTCTGGTTCTGGTTCTGGTTCTAGTTCCAGTTCTGCCTCAAGTTCAGCTTCCTCATCTTCCAGT
Gma.13643.1.A1_at	CD402512		0	No Homology to Known Proteins			GCTTAATTACTTTCCGTTGTGATCAATTGTTGTACCGATGGGTGTTTATGAAAGTGGAGCTTCGGGAAAGATGGGCACTCGTCATGTGCTGCAACTCGATTTGTCGCAACAAGAGGAGAAGAAGATACCTTGATGAAACCCCATCAGGATGTGAACCAAGGCCACTGCTCAAACTCTTCGATATGCGCTAGCTAGGCAATCCCTTTACTTAATCTGATAATTGATCTCTTGCTACCAGATCTGCCCTTACGGATCTGTTGAA
Gma.13747.1.A1_at	CD404869		0	No Homology to Known Proteins			GTTTTTTCAATCTAGATACACCTATATTCTTGTAAGAATTTGTCTATGGGCTGGTGATGCTCCTTAAATTAATTTCCTGTTAGGCTTTGATGTTTCTAAGTTCTTCTGTCTTGTGAAGGCGTGTTGACATCTCACATCGGTAGGGTTTATGTTTAAAAGTCTCCTTGTAATGATTTGGGCCATCATATCCTCTTCAACTAGTT
Gma.13836.1.A1_at	CD407625		0	No Homology to Known Proteins			GCCTTTTGAACAAGCGCAGGGTGGTATGGTCGTGGATCCAAGGGAGGGCAAAGGTATATTGGCACCACAGCCCATGCCCCTCCCACCGCCACCTCCACCTCCATCCCACATGTCACATGGGAAACAGAACTACTATTCTGGGGAGGTTGGGCATGATGGTCAGGGTTATGGGTGGCAGCATGATAACCGTGATAACTTTGGTAACCAAGTCTAGTAGTGAGGTTTCCAANAGATACTTTCTTGGATTAGGTTTAGTTACTTCCGAGGATGTTTTTACTAGCATATTTGTCCTCATGCATCATTCAAATCTCTAAACAGCNATTAAACTATTTTACTTTTGGTCCAATTTCTATTTGTAT
Gma.14197.1.A1_at	CD417305		0	No Homology to Known Proteins			GGAAGTAGCTCTTGATATGATATCTTTTGGTAGTAAGCAAGAACTGCACTTATCAGGGCAAAAGTATATGATGGGGGCCTTTCTGGATTGTGTTGCCCCCTTTAATTGCCAGGGAAAGAAACTGTGATTTACTGTGTTAGAAAACGGAAGGTGGTACAAGTTACAATACGCTTGCTCTGGATGAAGGGTAGTTGTTGAATTAAGGTTGTTTGCAACAAAAGGGTTTGAACTTTGGTATGGTTGTCGTAGGTTTTGGCGACAGTGACACGTTTGAAGATAGTATCATCTTGTTTCGGCTCCTTTGGTCTCCACAGTTTTGATTAAATTTAAATTACGGCATTGGATGCTTTGGTTCGTAGTTGTTGGCATAATTCAGGAAACTTTGATGAGGTAGTAGTT…
Gma.14213.1.A1_at	CD418017		0	No Homology to Known Proteins			GTGGCTAGTTGTCATCATTTCTTTCTTTTTTGTTGCAATCAAATTGATTGACTGTGGGTGGCCACTGTTGAAAACTCGAAATAAGAGAAAGAGACAAACATGGTGGGAGAAATTTTGGGTACTACTTCTGGCTTGACTCTTCCGTGCTGGTGGGGATTTTTCTGTGTGAACATGTTTGGGAAGCCATAAAATATTGCCTTTTCTCTCTCTCTCTCTCTCTCTCGCACATTTTAAAATTTAGAAGAATACATTGCATCAACAGCTCCTATGCTGTTTG
Gma.14267.1.S1_at	CA850808		0	No Homology to Known Proteins			GAAACAGATTTATTCTATACCCGATAAGTAACAATACGCAATGGTGGGGAGACGAGAGGGGTTTACAATTTTCTCTATGAATATTTAAATAAGTAAATGCAGACATACTCACTTATCACCCCAATGACCCATTCGTAACAACTTTACTT
Gma.14304.1.S1_at	CA852438		0	No Homology to Known Proteins			AAATATACTTCTCTTGTCGGCGGCAATAGACAACAAAGGTAAAAGCCGGCGAAGAGCATATTTCCAAGTTTGAGGATTGTTGAAATGGGGTCATAAGTCATTTGTCTTGGTGAGAGTTTGTACTGTTGTCTTAAACCAGTCTTATATCATTTTATCATCTTAATTGAAGTAATGAACCCACAATATGGAGGGATCGTTACTTCAACTAGTCCCATGTTCTTTAAATGCATTTC
Gma.14379.1.A1_at	CD412090		0	No Homology to Known Proteins			TAATCTTAATAGTCTCATTGTGGTTTTATTTGTAGTATTCCTTTGGTAGGCATATTGGTAGCATGTTGGAAAGTGATTTTACTCGGGTAGTTATTTCACGTGTTCCAATTGTTGAGTTCCCCTGCTGATTGGAACGAGTATATGTCTGTTGATTAATTACGGATCATTGAGTAGAGCACATTTCAAAAGCCTATTGTCTATGTTNATCATCAAGGGAATACATGGTTTTA
Gma.14471.1.S1_s_at	CF921241		0	No Homology to Known Proteins			GAGCATAAGGGTGAGCACCATGCTGGAGAATACA
Gma.14945.1.S1_at	BG157566		0	No Homology to Known Proteins			GCAGATTCCACCTCCAGTGGTGGTGCTGCCACCGCATCTGATCCATTTGCTTCTGCTGGTGGAGCTGATGAAGATGATCTTTACAGTTAGGTCAACTTGAATGGTAGTAAATGCCGTGCTATCTTAGTTATGTACTTCTCATTTTGTGTATGCAAATGAGGTCTCTAAAGGCTTCCTTTGGATTATTGTTGTCATTGTTTTGCAAACGGCAT
Gma.15390.1.S1_s_at	BG551358		0	No Homology to Known Proteins			GAAATTATGAGAAAGGTTTGCAGCTTTTTGTAATGCCGTTTCACTTTATCATGGACCATGTTTGGATGTCAACTCTCCAATAAAACCATTTCTACT
Gma.1543.2.S1_at	BG507578		0	No Homology to Known Proteins			TTACATTTGCGGTTGTTAGGGCCATGTTGATGGAACACCGCCGAATTATGTATCTTTATCACAGTCGTGCTTTTCGGAAAGGAAAAGGATAACTTAGAGTGAAAACTTTTACAGTTGATATATGTAGTTTGGGATTCTGTTATGAAATATTTGTTTTCGTTGGGTATGACTATGAAATGTGGCTGAAGAAACCGAAGTCTGCTTGTATTATGCACTCCGGCTTCCTTTCATTGGATTTAATCATTTGTTTATTCAAGTATTCAACAAGTGGGTTTGGAAGTGGGAACCATGATCTCATCTATGCATGCACACAACACAAAGAAAGCATGGGCTGCATTGTAGGAGGCTGCAGAATTCACCCATTGTTGCTTTGTGCTTTGGTTAAAACT
Gma.15437.1.S1_at	BG508889		0	No Homology to Known Proteins			AACTTCTTGTTGCATACACGTTGAAATTCAGAGTCGGAGGAGATTTTGCTTTTGAAGCTTCACGACCATATGTAATCACCTAACTAATATTATCATGTAACGATGTCTTATGATTTTCCAATTGTGATGTGAGG
Gma.15443.1.S1_at	BG511517		0	No Homology to Known Proteins			CCTCTATAGTCTTTATTATTGCTCATCCCATAGCATGAAATCATGAATTCCAACCACACTTAACTGGCTTCGAATAGGTGTGCGATTAGATTGATTTA
Gma.15475.1.S1_at	BE190311		0	No Homology to Known Proteins			GAGATACAGATATTGATGCTAGTTCATTGGCTTCCTGTACAAAACTTCAACAGGAAGAGGACGTCTCATTCAGTGATCTAGATGATGATAGGAGTTATAGCTCTGACAAATTATCAGGCTATAGGGAGGCACATGANNNNNGGGGTTCATCACCTGAAGGTGCTACTAGTGACTGGGTTCGGCTGCGTNAAAGTTCTGAGAGNGATGGCAGGAAGAAGGTTATCCGTNTNAAGGGTAAGGATTCAGAAGATGAGTCAAATGATTGGCTCACTGTTGATGATTTCAATTAGATAGTCTTTTCTTGATTNACCAAGTTGTAAAGGTTCGATATTTACCCCCTTCCCCGTGGTTCTGTATTTAGGGAGTACAAAATTATATAAATCAAAGTATTTCTTTTCT…
Gma.15552.1.S1_at	CA852615		0	No Homology to Known Proteins			TATGTACAAGTCTGATGCTGATCGTGGTCAGTGGAAGTCGTCGAGATCACCACCTGGATCTAGATCAAGATCTGCTGAATTGTCACCAAGGCGTGGAAGATGAGGTTGCAGGTCGCTGGCAATGTGCTGTTAGGCTTCTGTACATTTCCTGTAACTTATCGTGACATTTGCAAA
Gma.15575.1.S1_at	BU765551		0	No Homology to Known Proteins			AACAATCAAATGCTTCCGAAATCTGAAACAAGTTCTAAAGAAAACATGGAGCCTAGCAAGGAGGAGTTCCATCTATGGAACTTGAATGGGGAGTCCAAAGCACTTTTGGATTGTGGTGAAGAGGATTCCAAGCTTGGAATCATCAGAACAGAAGATGATCACCCCTTCAGTTCAGCAGAAATGCATGCCACTGCCTCTTTGCTTTCGGCTTGCTAGAGACGGAAATACTAGTATACTACAAGGGTGTTGAAGCAATTTGAAGATTNAAATGAACCCACCAAGTTCAAGTTGTTAGCAAATATTGCATTTTCAATTCAGAAGAGCATAGTCTAAAGAACGTCTTATGGTACATGTATTCATATTTGATGGATATGGGCAACCATTATGTTACTGCTANAA…
Gma.15590.2.A1_at	CD399065		0	No Homology to Known Proteins			GTTGATAATCGTTTAATGCCTGTGTTGGAGCCCATTATATCTTTCTTTGGTGACTCCCAAGCTAGAGCAACTGAGGAGGATCATGAGGACTCATAATGAATGTTGGTGCTCCTTGGCAGCATAGTGTTAAAGCAAATTGGACCTTTAGGCACAAGATTGTTGATTTAGAGAAAGATTGTTTGAGATTACATTAATTTAACTTTATTTTGCAAAAAAATTGGACCTTTAGGATTTTATCATTTGTTCTGTTGTGACTTTCTAA
Gma.15638.1.S1_at	CA802038		0	No Homology to Known Proteins			CCTCATTAGGGTCTTTGGTCTATTTTTATTCGAATTATGGCGTGAACTTTGGATGATTTGAGTTTAAGCTTCAAGGCTTTAGTATGTTTTGGTTTAGTATATGATTTGAATCATGGCTTGAATTTTGGATTAATATATATGATCTGGCTTCTATATGGTGCTATTCCTGCTA
Gma.15690.1.S1_at	CD393040		0	No Homology to Known Proteins			GAAATTCCTGGATTGGCAGGAGACCTTATTTTGTTACTGGATGGGCAGCATCTCTTTTTTTTTCCTCTTCCCCTCCTTTCAATCCTAATATTCTTTCCCTCTATTTCTGTATCTTCTTCTGAAAGAGAAGGTGCAATCAATGTTTCAAATTGTGTTTGGCTTGCAAGTGAAGAAGAAAATGTGATTGTAGCTCTCCTACAACAGATACTAAAGGATGTTTCAATATCTGCCACCAGGATTCAGATTAAAAAATGTAGTTTTTCTTTTCTTTTTTTGCCCAGATATTTCTGT
Gma.15838.1.A1_s_at	CD415635		0	No Homology to Known Proteins			TATTTATTATTACATCTTCACTAGACTTCTTTGTACAGCTTGTGGTAGCAGTAGAGTGACTTAGAATATAGCTTCTCATGCTATGGAAAATCTGTTTGTTAATCTGTACTGGGAATTTCAATTTTCAACTCATCCAAACCAGAAGGCATCTTGCCTTCATTTT
Gma.1588.1.S1_at	CD404759		0	No Homology to Known Proteins			GTAATGGCTTTATTTCAGCTGATTATGAGGATGGAGGTTGGGATCGCAATAGGGGAAATGCTAGGGGCAGGGGTAGAGGAAGAGGACGTGGCTTTCGTGGTCGTGGAAGGGGAGGGTACAATGGGCCCCATGTTGACATGCAAGATGGAGGATACAACCAAGATGTACCTCAAGGCCGTGGTCGTGGCCGTGGCAGGGGGGGATATCGTGGAAGGGGTCGTGGCTTCCGATCGAATGGGCCAATCCAAGCAGCTGCCTGAGGCAACCAGTAGGCCGCCATTAGTGCAGTGCAGATGACTTGACTAGTGAAAGAAAGCCATGTCTAATTTTATGTTTTCTTTTATTTGTTCAATTTTCTTCATTTCCCCCTTCTTTTTCTCTGGGGCCCTGAAGAACTGT…
Gma.15882.1.S1_at	BQ452888		0	No Homology to Known Proteins			TCAAAAATTTCAGCTCGGATCGATAATGATATGCGGAGTGATTATTCGCAGAAATCGACAGTAACACGGTTTTCTGCCAGGGTTACAAATGATACCCTCAGTAGTTCGTCACACATGTCATCAGTATCCCGTGGCTATGGCTCTCGGGTGAACTTTGACATCACCAGCTTCGCATCATCCCGGGGAATTGCCCCTCCTGGCTGGACTTCGCGAGTCCATTNGGCTATCCGAAGCAATACTTCGGCAACTTGATTCATGGACGCATGTCCATAACATATATAAGGAAGCCACTTCTGGGAGAAAGTACTGTT
Gma.15898.1.S1_at	AW460025		0	No Homology to Known Proteins			GATTCTTCTGGCACGTAACTAACAAAATAACTTGACGCTTCTTCAAAACTAACATGTCAAAGATGTTTAGTGTAAAAAATTTTAGGTTTTCCATGACTAGTTTTAAAACTGCAGCATGTTACTTGAATTNCNNNTNCNCAGGCTTGTCTGAAGNAAGGTACTGCTATAATTGGACTTGTTATGTTTGATGATCAAATTNGCTGCCTCATTTATCTACTGTTCACCAGTTTTGAAACTCATTTGTTTGGATCAGGATTCAATAGAGGTATGCCTTAAAAGCATAACCATTTANTAGTGCCATTGTCATCATGGAGGTTAGTTTGCCGTTGATTGTGGTTTTCTATCAAGTAGTTTAGGAAANGGTAAANNGAAAAANNNANAAAAAATGCAGAAGACATG…
Gma.15940.1.A1_at	AW397591		0	No Homology to Known Proteins			TAATTTCAGTTCAGAATTGAGATTCTTATTGTAAATAGGGGCAGTTAGATTCAAAATTTCTTTGCAATTTGCGTTATATCAATAGATGTTTTTCTCCAGAAATGATCGCCGAAGGGGACTCGAGAGAAAGATTGTTCTTGCTGCAGAACATACGTTCTGGGGGAAGAAGACATGCTTAATTACTTGATTTTTTTAATGTTCATATAGTATGTTTTAGCCGCAAATTCTTTGTAAGCATTGTTTTTAGTTTTATGTCCTATGTTTTCCCAATAT
Gma.16136.2.A1_at	CD412154		0	No Homology to Known Proteins			AGAAATCGCGTAAACAAGCTGAATTTTTACATTCTCAAACTTTTTCTATGTTTTATGTGTGTGCAGTTGTGCCTCTCTACAGGAAAACAGATGAAAATTGTTTTCTCACCGTTTGCTTTCCAAGGCCGCATTACATTTCATTTAATCAGCTGGAAATAGGCATGTTTTGTGCTTGTAATGTGTAATTGTTAATCAAACCAAACTAAATTGAATATTCTGGTTTGTCTTGTCTATGCGCTTTTAT
Gma.16277.2.A1_at	CD399645		0	No Homology to Known Proteins			GACTAGTCTTGATTTCTCCAGTTATCCTTGATATGTCAAGCCAGACTGCTGATTGATTAAGTGAATGTAAGGGTATCACATGAATACCTATAGCGTCAGAAATTTTAGCTTTCAAGTTTTTCTAGCACCATGTGGCCTTATATGAGTTAGCTCATGCAAGAAGGAAAAAAAAAACAATTTTGTGCTACGGACATATTTGTAGGCAGTAATTTTTTCTATACTTTATCGATTAGTTTGCTCCTGTACCATCATTTTGATGGACCATGATTT
Gma.16295.1.A1_at	CD411116		0	No Homology to Known Proteins			TCTGGCGGTGGTGGTGCCTACCAAAGTGGCTATGATGGAAANCTAGGAGGTGGATATGGAGGGGCTAGTGGTGGCCCCTTCTATGGGAGCAGTAGAGCAGGATACAGTGCTGGTCGATATCATCCTTATGGAAGATAAGATTGCAAACAAAGCATTTATAGTCTAGGACTAATATGTCTAGCATCAAAGCTAGTTTGTGTTTGGTTCGTCAACTAGATTATATATTCTCTTTCAAAAAAAGAATTATCAAGGTCACTCTCATTTACCAGTACNACATCCATTTCTTGAAGGTCCAAACAAATTTTCTATTCCCCCTCCCCCGAAGTCTGCTTTTTGATTTATGTAAGAACTGCTGCAAATGGTTGTATTCTCTGTCTCATCATCGTTGCTTGTAATGCT…
Gma.16412.1.S1_at	BM885956		0	No Homology to Known Proteins			AACAGCACGGAGTTGTCAAAACCCAGGACCGAAGTTGGAGGTGCACGGTAGCGTTTGTACTTTGTAAATTCCTGGTTGGCCTATGGAGATAAATTGAATTTGTAATAACAAGAAGCCTGTGGAGATAGTACTTGTGACTTCCGATTATTGTCCTTTCAAATCGTAGTAGCACTACAGTGCTTGTTACAGCTCTCATTTCTTGGATACTGCTTGCACTAAGTAAACAGTTTGTGACATGAATGGTAATTTTATATGTACGCTTCGTTTGGTGCAAGAAAAATAAAGGGGAAATNGAGATGAGATAGTAAANNNNNNNNANNNNNTGGTGTGGAATTTGGAAAGTAGAAACGAACAGTAATCTGATACGGTGTATAAATTTGTGGTGGATCTTTTTTATTG…
Gma.16421.1.S1_at	BI969187		0	No Homology to Known Proteins			TGGTTTTGGAGTTCATTCATATTTAATAAATCTACCTAAGTTTTTCTTAATTTTGTATTTTGGCANNNTNNGNCNNNTNNNGNNNNNCNCCAATGATGATAAATCCTAAGGCTTGTTTCTCTAAACATTCGCAGTGGCCGCCCAAGAGCTTTCGCCTTCGCCAGGCTAGAGAGCTAATGCTGCTATTATCCTTCCTTGGATGTCTGAGGTCAAATTATATCATAAGTTTGACTATTTTCTCATTTCAGGCTAGCACCTGTGTCCTTGGTACGATTTTGTTACACATGGCTAAATGAAGATGGTGTTTTCGTCACTCATATTTTTGTATCCACTGGAATTAGTCTGTTCCCGCATAGTTGACAAATAAATACTATGTATAGATGGAATGGATCCTGAATC…
Gma.16606.2.S1_a_at	AW396382		0	No Homology to Known Proteins			GGATTCTAATTCTATGTTTTAGCCTCTCGGGGGTGTCGTCGTCTTTTTACCCAGGAAAGGGGGNNNNGNNGAAAAGGCGAATGCAGTAGTAGTGAACCGAAATGGACATCGAGGAGTTGTTGTCGATGATTCGGGTACATGTGCTGCCTGTTGTATTGCTCGTGGCTGATGTTGTTGCTATGTTGGCGTGATTGTGAATATGCTTGCAAATTGATTGGTGTGGCTCATGGTCATTCGTGGCTGCGTTT
Gma.16631.1.S1_a_at	BU549854		0	No Homology to Known Proteins			TATCAGTTTCTCCATAGTTTCCTTGGAAGGAGGAGCTGCGAGTGCTTGTACATTTTGCCTCCATATCCAGTTAAANNNTAGTTTTATTGTCGTCTTCAAAACCATCAAGTGAATGGGTATCTCAAGGATTTCAAGATTGTNCCTGTCGTCATTGTCGCCTTTTATTACGTGTTCTTCCGGTGAATGCTTTATATGATAACTCCGAGGAAATGGATCTTATACTTTCACATCTCGGGATATTTGGATTT
Gma.16828.1.A1_at	AF047051.1		0	No Homology to Known Proteins			AGCAGTAACAACATTGTTTTGAGCTAATAACATAAGACGAACATAAACTACTTGAATCCAACAAAATGTATCAAACATCAAAAAGGAGAAACCAGTGCCACTAACAACTGGGTGTCCCATTCGACA
Gma.16829.1.S1_x_at	AF047049.1		0	No Homology to Known Proteins			GTATTATTGAATTTCTCCGGAATCTTCTTCTGTGTATGGTTTTCCTTCCTTTGTGTTTTCTTTCCTGTTGAATCGGTGGCCGTTGATCTTTGGT
Gma.16861.1.A1_at	CD401560		0	No Homology to Known Proteins			GTCTTTTAGTAAGAGCATAGCTTAAGAGCATGATTGATTCACATTAGCCGTTTCGTGCGTCCTTTTCAGTAATAATTTTCTTAAGTTCAAGCTTAGAAGTTTAGACTAACTAGCATTTTGGTCGTCAGCTACTTCCTTCACTGTCAAACAGTGCCACAGTGCATTCAAGTTGTCGAAATTGCTTTTCTGTGTTTTCTCTTCCCTTGTTAGTGGTTAATGGT
Gma.16919.1.S1_s_at	BI967467		0	No Homology to Known Proteins			ATTTTATCTGTTAGTAATTTGCTACTACTATTTTACATTCTCTTTCTCTCTACGTTTTATTATAGTCATGGCATCTCAAGCAGTTTCCTTCAAGTCCTTCGCCGTTGCTCTTCTTGTGGCGCTTTTCTTCGCCGCCTCCGCCTCCGCTCAGGACTTGCCTCCGGCGGCGGCGCCGGGACCCGATGCCGGGGCCGCCGGAGCCGTTTCGAGCTCGGTCGCCATGATTGGAGCTTCCGTACTGTTGTCAATGCTCGCCATCTTCAAGCACTGAGTATAATCTGATGGATCCATCTTGTGTGAAGA
Gma.16925.1.A1_at	BG653419		0	No Homology to Known Proteins			GGTGTTCAAACATATTCACGAGGAAGGGATTGATGCGAGAAGAAGTCTTATTGAAGCTGCAGTGCGTTTCAAATAAGTATGTGATTTCCAAGTTGTAGTACATTTGAGTTGATTCACATGGTTGCTATTTGGCTTCTCTCTCACAATTCAATATACTGGTCCCTTCCTTTCTGATTTTTCCTCTTTAATCTTTTTGCAAATAACATGNAAATACTTGTTTTTCTGTTAGACNCGGTGGTTCATTAAGTGGCCAAAACCTGTTTT
Gma.16950.1.S1_at	BQ454216		0	No Homology to Known Proteins			AGGCTTTGATTGGTGTTAGGCTTTCAACAAGGTGAATATTTCAACCATTAAGAGGCGCAGGTCGTTTTTGAATGGCCTTAACATGCCACCTACTTCTGCTGATGTGATAATATTCATGCTACCTTTCCTTGGTGGCATGGTAAACATTCCTCTAGTTGGCCGAATCTTCTTTTCTTGGTTCTCTGCGGTATTGAAGCATTTTGGAACTTCACATTGCATTCATCTTCTATAAATTGCATGTTTAGGAATTCAAATTACAATGGAGACGGATTGTCAGTTCTAGGGATTCA
Gma.17241.1.A1_at	AW310327		0	No Homology to Known Proteins			GCATGCATTTTAAACGGAGAGCTACTCTAACTATGGTACTATAGAAAAAATCTAAGAGTTTTAGTATTGTTATTTTTTTGGATTAATAGTTGAATGAGTTTGAGAAGTGAAAAAGAGAGAGGGAGAAAGAGAGATTCATTAAATGGAAGCTCGTTTAACTATTGGTAAAAAAAATATCAGTACTAAAACCTTAAATTTCTCAGGCTACCATAGAATTTCTCTTTTAGACTTTTCTAACTTGATAGACTTTGTTTGGATGAGTTTGCTTGCAAATTTTACATTGGCAACTGTCCCCTTTTTTCTCTTTGATTTGGACTCTGCTGCTTTCTTTGTGAAGAATGAGGGAAGAAGACAGTAAAATCGTACAACTCAAAAATGAACTCTATCCCAATTCCT
Gma.17258.1.S1_s_at	BG509247		0	No Homology to Known Proteins			CGTTCTGAACAGAAGCTATATATATGTAGCTGCTTCATGAAGATGCAGAAGATCATATACGTGCATTCTTAGTTTGCATATAGTCCAAAATTGTCACATACCATTCCCTTATTCTTTTATTCCTGTGTA
Gma.17354.1.S1_at	AW596842		0	No Homology to Known Proteins			GCCCCTTTGGCGTTACTGTGTATATTGGTACTGCTAGTTCACGTTTCCTTCACGTTTCAAGTTGTGTTGCCCCTTTTTCCCTTAGTTCCATTACATTGGCTGGCTTATAATGGAAAAGAAAAAGTAGCCCTCATGTACCTTTTTATTTATTATTTTTTTTTTTAATTTGATTTTTCTCTAACATGTTCCGTGTACAATGATGTTAGGAATCCTTAAAGGATTAACAATGACACAATCTTATATTCTTTGGCTTTTCACCTCGAATTGATGATGTCAGGTTCAATGTTCTTATATTCTTTTGTCTTTGTGTCTAG
Gma.17357.1.S1_at	AW598033		0	No Homology to Known Proteins			GTGTAAATTGAAAATCCGGAGGGAGGGGTTTATTTGTGTTATAATTTATTAGATTAGCATGTATTTAGTTTTGATTCATTCAAAATCTCCACATGGAGGTTTTCTTCCTTGCTTTTAAGGCGGCATTTGACAAATCTTCGTGGTTATGTATATATATAAATATACACATTATACCTGCTCAATCGGGACTAGAAAGTTT
Gma.17560.1.S1_at	BG508832		0	No Homology to Known Proteins			GTCAACTTGAAAATGAGTCCTCGTTTTGTGTTGGATGTGATTTCACAAGACTTCATTGCTTCTGTCTATAGTCCTCAGTATTTTGATGGCAACTGTTCAAAGTTTCACTATCGCTGTTTAGAATTCATCATCCAATTCTGTTTAGAACCCCATGCTAGGTCATTCTCTTTTGTGCTCACCCCATCTG
Gma.17598.1.S1_s_at	BQ452947		0	No Homology to Known Proteins			ACACAAATCCAACGATACAGAGGTTATCAACAAAAGAACACCACTTCAGAGATCCCTCACTAGAATTAATGACTGGAAAGGCTAGACACGACCTCATCTACCAAAAAACTTGTCCCACATCACAAATAAAAATGCCAATCTTGACTGCATGTTCTCTAAAGAGTTACCAAATAGCTTTCACCATACAATCCCATGTCTTTTT
Gma.17607.2.S1_s_at	AW201640		0	No Homology to Known Proteins			ACCACCAGTTCACCCTCCCTACATTCCACACCCAGTTTACCACTCTCCTCCACCACCACCTTACAAGAAGCCTTACATCTATGCATCACCTCCCCCTCCTTACCACTATTAGCATACCTCTTATCGATATGAA
Gma.17639.1.S1_at	CF921774		0	No Homology to Known Proteins			GGGCTCTCGTGTCCGTAAAATGCATTCATATCATGCATCGCATAAGCATCTCTTCATAACATCATAATGAACATATCGTTCCTGCATTTGTCCGTTATCATATTCCAGCCTCACATTTTGCATGAGTCATGGCATCATCATGCATATGCGTTCAACAAACTTTTTGATCTGCAAAATTGCATACCATTTGTTTTCATGTT
Gma.17678.1.S1_at	CA803049		0	No Homology to Known Proteins			GAATTTTAGTTGAGTACACATTTAATCATTGTTGTCAGAGATTTTTTAAAGTTGAGCATGTTGCTTCCTAGGTTTGGTTGATTATTGTTTTTTATAATTCGGTTCTCCCTTTCGGCTACTCTTAAGCATGAATGAATTATAAATCTATTCGTTGTTCGTCA
Gma.17689.1.A1_at	AW310928		0	No Homology to Known Proteins			TTACTCAAATGGTCGTGGAGGTCGAAGTGGTGGCAGAGGAGGCTACCAAAANGGGCGCAANCAATANTANGATCANCCTGGAAATTATTATCCAAGGAACAACTATTATAACAACAGAGGAAGNGGNGGCAGAGGTGGTGGCTATTACAACAACCATGGTGCNGGNGGTCAAGTTAATCANGTCGCAGGTGATGTGGGGGTGCAATCATGATAAGTTATGAGTTGTTTATAGTGGTTATTACTGTCACTAGTTGGTGGTGAACCATTTTTTATNCNCCTGGCATGAAAACATGTTTTGAACAATTTTGTTTGACACTTGAANGTTCAAACGTCTAGANNNCTCCACTATTTTGTAGTCCAGTGGCTAGTGTGGNCCTTTGTCCGAAATCTCACNNNNNN…
Gma.17798.2.S1_at	CD412748		0	No Homology to Known Proteins			AAGATACGGCAGTTGTTGTTACCACTTCCTTAGGTGGCACCCTCAGAAATAAAAAAATATGCTCCATATTTTATGTAGTTGCAATACCTGTGCCCTGTCACTGAGGCCGGTGTTGGGAACTACTGCTTTATCTTGTATAGGATGAAAAATGTGTCAAAAAGCAAGTAATAATATAACATAGAGTGGGGAGTACTTTATGTTGGTATGTGATGCTAA
Gma.1780.1.S1_at	BM892829		0	No Homology to Known Proteins			TGGATCCGACAAACATTCTGGCAAGAGGAGAAAGAGAGGTAGGTCAAAGAAGAGGAGTGCTAAGAGGGAAGTTAGTGATTCGGATGATTCACGTGAAGAAAGAAGGAGGAGGAAGAGAAGGCGAGAACCCAGGAGGAAGAGGGACAATTCTTCAGATGAAGACGACGAGTATAAGCGCAGGCATAGAAAGAGTAGGAAGGAGAAGAGGAGAAGGAGAAGCCGTCTATCAGATCCTGATTCCTCTGAAGATTTCATTAGAAGGCACAAGCGAAAGAACAAGAGGGCCTCATCATCATCTGACACTGATTCAAGTGGATATAATGATTCAAGGAAGGGTAGGGATGTCAATAAATCAGGAAAGAGAAGGAGCCGTCACCATGGGGATGATGAATGATTAGT…
Gma.17900.2.A1_at	BQ610408		0	No Homology to Known Proteins			TTGTTCCGTGTTAACTGTTCCATCTAGGTTATGCTTCTCCTTGCTAGACAAGCTCACTGGTTTTTCTTATGCTTTGATAAACATTTCAATTTGCCTTATATAGCATGCATGGTGGATAGTCCAGTGGAATTGCCTTGTGAGACGTTGTTGCTTGTTTTGGTCCTTCCATGTTTGGGGTTTGAAGGTTGAGGGCCTTAAACTATAGGTGGTGATAGGAACACGTGAAATGGACAAAGAAGGTGGATCCAAGTGGTTTGGATCTCATAGCATTTGTATTTATTTTTCTTGTTTGGTCTTCAATTGGAGAGGCCGCCACCACAAACAATGGCTCGGGCAAATGCTTCTTGTAGGTTTTGCACTTTCCCAATCGTTAATACGA
Gma.17999.1.S1_at	BI971315		0	No Homology to Known Proteins			ATTGTTTTTGACAGTGTAGGGTTCTGTCAGAGTTAGACTTGACTTGATGTTTCTTTTTGGGAAATGTACGAGGATAACTGGTTCTTTATAGGATTGGCCCCGTATGATTTGGTGATGTTGGATTTATAAGTGTTTAGTTACTTATTTACTTCTCAATTGATTCTCTGTGTCATGAATTGTGGCTATAAGACGTTGTTATTTGACTTCTCAATGGACTACTATATTGGAGAGAGAATATTAGACAGTCTTTGTCAGGT
Gma.18044.1.S1_a_at	AW757140		0	No Homology to Known Proteins			TGAGAAATGAGCCTGACCACTATATATCCTCCATGGATCGATGACTGAAATAAAATATATATAGTAGTTTGTTTTTCTCTAGCCTTTGCGGATGATGCTGTATCCATTTTTGTTTATGTTAATTTTGTGCATATATATAGTATATAGTATATAGCATATGTATGAATATGTTTACGAGTTCATCAGTTGAGCGATTGAAGTCCTGAAACGATCGAGGTAGCTGTGTGTGGTTTAACAGCTTGGTCTTGTTTTAT
Gma.2143.2.A1_s_at	CD390563		0	No Homology to Known Proteins			TAGGTATAACATGGAAGATCTCGTAAACTATTCAAAGCTGTGGAAGCTGAAGTTGGCNATTGCATGGATGTGGATTTGAGGATACCTTCCAGTCTGTTCTGTTTTGTTTTTAGTCTNGGAGGTATGACAACTATTCTCGGTGTTATGTAACAAAGTCTGTTCTATTTTTGTAATTCTTTTTTTATACGCCGTTTTTGTTCTTAGTTGGGTCGAGATCGATTATTATGCCCTTT
Gma.2148.1.S1_at	CD406397		0	No Homology to Known Proteins			GCTTCCCACCAGTTTTAGGAGCATGTGTTATATTAGTTCATGTCATGGGTGTTGAATGTGTTTGATAGCTACCTGCTGCCACTGAAGGAAGAGCAAATATATAGCTTTCTGCTGCTGCTGGAGCTTTAAAGTGTGATTGTTTGACTTTGATGTCACTTGCAAGCCATTATATCTCCCGTTACGTCATACATATCTGGTATTACATTGATATTTATATCTTTCGTTTGTTGAAACTCGCGAAAATTCTGAAGCCATAAGTGGTCCCTATGGGGTCATTAAGACTAATTATACAGGTTACAGCTGTATAAGTGGATATTCCTGTCTATTTGGACCTGAAGTTGCATGGAATTATATTTGACTATTCCATAACGCCGCCGCCGCNTCATCTTCCCTTTCATA…
Gma.2364.1.S1_at	BM270501		0	No Homology to Known Proteins			TATAACTCCGCATGACTTTTGGTATTTCTTTCCTTCATAAGCTAATTATGACACCGTGAAATATATTTAGTGACTTCGTATAAATTGACCAAATATAGAGTAGAACCTATAAGACTACGGGTAG
Gma.259.1.S1_at	BI943015		0	No Homology to Known Proteins			ACGTCGAAAGCTATCTTGTGTTTGAGAGTAATTATTAGTGCTGCTCGTGAAGTTGCTCAATTGGGCGTTGATATTGTGGTTATGCCTGCTGATGATATTCTCCAACATGCTGTTGATATTGAGAAAAGCCGTTTAGGCTGTTCTTGCTCATATTTTGTATTCATTGTGGTTTGTTGCTTTTCTAATGTATCCAGCGATTG
Gma.2615.1.S1_at	BI317766		0	No Homology to Known Proteins			GGGTGCTTTTATGTTTCCACTAGTTTGACTACGATGTAATATCCTAGCATTACTGTAAATGTTCCTTATGGCGCGTTCATTGCTTGAGAAAAAA
Gma.2692.1.S1_at	BI425364		0	No Homology to Known Proteins			TCTTGTGACTTGACCTTATAACTCCTATCGGGATGTCCATTTTAATACTTCGACTTCGTAAAAGGATGCGTAGGGATAACAAAAGAGGCCGTGTTGCCTTAATGTGAGTAGTTTGAT
Gma.2772.1.S1_at	BG238134		0	No Homology to Known Proteins			GAGTTAATTGATTGGCGTCTGGGACGCACGCGCTGTCGGTATAACCACCGTAAGATTGAAGGTTTGGGTTTCTCAAACATGTTAATTAGTTGCCTTGATTTCTCCGAAGAACAAAACGAAAAATGATTCTACACGTCTCCCTCTCTCTCTCTCTTTGTCCTTTTCGGATTAATTAGGTTGTAATAATAAATAATATAGGAGGCTTAGCAGTGCTGTTGATTGATGAAATTTTAAATGATACNAAAGTTTGTTATTAACTGTTGTCTTTTTTTCTTGTGGAAATGACACATTTTCCCTTCATCTCTCTGTATTGAATTATCTTCTCTCCCCCATATATACAANTNNAAGGAACCTATTTGGCTATTTCCATGAGATATTGA
Gma.2991.1.A1_at	CD391207		0	No Homology to Known Proteins			GAGCTGGCGCAGGTACCTTGGTTTTGTTTTGCATTTTTGGTCGTTTGTACTATGGTATTGAACTCGTCCAGCATTGAGGCACAGGCCTCTTTCGCCATTTCTAGCTTTGCTCTGGAAATTGCTACTTGTTATACTAAA
Gma.3000.1.S1_at	BE657172		0	No Homology to Known Proteins			TTACCATACATCTTATGCTTTTGAGCTTTGCTTGTGTTCACTTTAGTTAAGTTTTAAATAAAAGTTTATTTTATTTGGGATTTTTAGTTTATTCCTTTTGTGCTTGATCCTTGGATTGTTTGCTTATGATTTGTAAGAACTTTGTTGAATTCTAATCAAGTGGAAAAGAGTTCACAAGTAACTACACTAGGGAAATCTTAGAAGCTTTGAAGCTAAGAACAAAAGGGGTTCAATCCGAAGAAGTCAAACATATCACACGTCGATCAGAAGCAACCAATGATATTTATGCCTACGGGAGTGCATGATTCTATTCATTTGATTGTAATGGGGAAATTCAATCGGATTCTGAATGAAGAGAACAACCAATGATATTTATGCCTAGGGGTAAATTGTTAGACA…
Gma.3102.1.S1_at	BG839165		0	No Homology to Known Proteins			TTTCCTCAATCCTAGTCTCCTTTAGGTTGTTTGTTAGTGTTTTTTGCTTCATTGTTTTTCGATCTTATTTGAAAGTAGCTTTTAAAGCACATCACGTTGATTAGAAGCATGTTTCTTGAAAAGGGGATAAATATACTATGTTTGGGTACCTTGTGGAAATGTTATCATGTTTGGTATAGAGCTATTGCACTACTTTACTTTGGATCGGCAGAAATGTTGAGGCTCAAGTTCCTGGTACTATCTTCTGGCACTCAAGAAAAGAGTTAGCTGAATGTTTTGGTGGGGCTGAATTCTGTATGTTTTCAAGTCGGTTTTAAAANTCGGTTTATTTTCAAGGCTGTAGCTTCCAATTTTTATTATCTTTACTGTCACCTTAAGATAAGTTAAACCCTTTGAAGT…
Gma.3109.1.A1_at	CD408055		0	No Homology to Known Proteins			GATTTGCGAGTTTTTTCATTCCCAGCTTGTCTTGGAGGGAATTTAAGTAAACAAGGACAAGGATTCAAGGTTGGTGGTCAACATTATATTCTAATGGTTATGATGGCCCACGTGAAGCATGACTGATTTCCGATTTCAAAAAATGTTGTAGTCATTAAAATTGGACTGGGTTTGTAGTATTAGTTTGAAGATGCTCCGAATAATTAAGANTTTTCTATTTATATTTTGGATTCTAATATTTGCACGTTATAATTTCCTATATCTCTTTTATCAGGTT
Gma.3112.3.A1_at	BG839772		0	No Homology to Known Proteins			GGTGAATTGGTGATTGGTGACTATCNTCCAAGTAACACCATTTTCACTCATTGGGGTCGAATAGCTTTTTTTATCCTTTTTTCATAAGCTTGGCTTATTAAGGTGTATGTACCTTGGTCCATCTTAGTNACAGTGCATGTAAGACCATATCTATTGTGATCCCCACAATTCTGTAACGTGGGGGTGCCCTACTTGT
Gma.3112.3.A1_x_at	BG839772		0	No Homology to Known Proteins			GTAGCTTTTAGACAATGATTCTGGATAACGCAATGGCAAAATATTTGCCATTCAATATAATAAAGAAATAACTGTTCTTTAAGGATGGTGAATTGGTGATTGGTGACTATCNTCCAAGTAACACCATTTTCACTCATTGGGGTCGAATAGCTTTTTTTATCCTTTTTTCATAAGCTTGGCTTATTAAGGTGTATGTACCTTGGTCCATCTTAGTNACAGTGCATGTAAGACCATATCTATTGTGATCCCCACAATTCTGTAACGTGGGGGTGCCCTACTTGTAGGTAGCTTCTCAACATTT
Gma.3256.3.A1_at	CD394799		0	No Homology to Known Proteins			GAGAAATAAACTCATCATGCTCATCACAGTTCACCTGAGTTTAGGAATAGAGATTTGAGAAGCCCGTAGTACCCACAGTTGCTTCTTACTGTTGCAAACAGACTATGTGGATCTTGTAGCTTAACCCCTGAACCGATGGTGGATTGAAGTGCAAGAAAATGGGAATTGGCTTCCCGATCATGCTTTTTGTTATGCTCTCTGTTGACCTTTTAGATTATGTGTTTCTTCATCTACTACGGATTGCATGTATCAGATATATTAATATATGGCAGATGGTTGTTTATATTT
Gma.3367.1.S1_at	BU083449		0	No Homology to Known Proteins			GATTGCTTTTGATTCCAGTTGTTTAATTGTCAACTGTTTAAGAATAGCTATGTTGCAAAGTAGAGACTACTGTGTGGTGTTGTTGATTTATTAGTAGAGTATAAAATTAAGGATGTTTTGTCAATGTGTGATGCTACATATTTTCTACTTTGATAGTTTCCTGTTCAAAATCACGCAAGTATAAGTGCATGCAATTTCAAATTCCGTGTTGTATATATGTTAAGCTACTATATGTATGTGATCTGTTGGCACGACTTGTG
Gma.3406.2.A1_at	BQ628046		0	No Homology to Known Proteins			AGGTATTTAAGATCCGGACGGCAATTTGTTTGCATAGGCACTTGGCATGATTAATGTTTTTTTTCCTTCTTTGATGAGTCGTGTGCTTGTGCCAAGTTCAAATGGTGAGCAACGAGGAGCTTGGTTTAAAGGTTTGACTAGTTAATTGATGTGTTCAAATTCCTGAAAATGTTATCTCACTCACGATTAAGAACTATACATGGANNNNCANCTGTTCAATTTTTTACCCTTCATTAGTCATACACTGATGTTGCTTGGAATGATTGTCGATTGAAGTTTTACAATCAACTATTCCTTTGCATAGATGATGTTCAAATGTANNNCGAATTATACTTTCCTGTANNNATATGCAATTCACATGTCATTTGTCCTAA
Gma.3407.1.S1_at	BQ628049		0	No Homology to Known Proteins			AAGGTTAAAGCAATGTTCATAGCACATTTGGCAGAATAAAAAGAATATGGTATGCATCTAAATTTATTAAAACAATAAAAACTGTAGAGATGTGTGTACCCTGGATAGTAATTTGCGAACCATTAAACTCTTTTTTTAATTGTGTGAAGACTTTAATTATATATATTCTCGTGAAGACTGACTTCTATATCATCAAATATTTGTAAGTGCATGGAAGTCAATCTGATTTGAGGGATGCTTCTAGTTCATATGTGAAGGAAGAAAGAATAGAGGAAGTTCACTTCTGTGTTCAAGT
Gma.3492.1.S1_at	BE347724		0	No Homology to Known Proteins			TCTCGACAAGCCCAACAGCAGTAATTTTGGTAGATGAATCTCTTGCTGGATCTTAAACTTCAACTTGAGGATCCCTGGCTTTTAAAAGTCTTAAATCATGAGGTCACAATGAATTCTTCCAGCAGCAATGGAGTGGCTCAAAGATCAATGTCAATACACAATGGGACTGGTTGGGTTGCTTGAATCCCAGTAGTTTGCAGTACCCGCTTTCCTAGTTTATAATAAGTAGTATGGTTGAAGAGATACTAGATGCTACTTTCTATTTAGTATTNGTTTCTGCGTGTAGCTTTAATTTGCTTGCTTATGATTTTAGTTGATCTGGATTTGTNNGTTCTTGNAGCATTTAAGCTATAGTATCATATTTCACCTTAT
Gma.3594.1.S1_at	BQ613138		0	No Homology to Known Proteins			GGCTCCTTCACCGTCGTTGCTGGGACCTCCTGCGCCACCCACCGGGGCTCCTGGTCCTAGCGAGGACGCTTCTTCCCCTGGACCTGCCACTGCTGCCAACGATGAGAGTGGAGCAGAGACCATCATGTGCTTGAAGAAGGTTCTAGGAGGCTTAGGTTTGGGTTGGGCTACCCTTGTTTTGGTCTTCTAGACAGGCTTTGTTGCTGTTATTATATTCTTGTATTGTATCATTTATTTTCCTTTTTTGTTTCTTTTTCTTTTGACCCTGTTTTGGGTACACATTACATTTATTTACATTGTTACCTTCAGACCCTTATTATTCGATTGATGTCGTTGTCATCACTAGTGCTACTGTGCTTGGCTTTTTGTCTCGTTCGTTTTGGGTTTAGATCATTATTA…
Gma.3619.1.S1_at	AW831066		0	No Homology to Known Proteins			ACTAGGTCCCATCAAGACAGTTGGTTCCAGCTTCTGGGATTTCTATCTGAGGTCTTCTCAAGGTGCCACGAAGAGATTTTATGGACTGGTTGTTTGTTTCCTGGTGTTGTGGTTTTGTAGTGCCCTGAATTTTGTCATTTTGCGCGTGGTATGAACAATATTCCTTAGGGTCAGTTACAATTTACTAGAGTTTATATATAGCACATTCTTTTGGGGCTTTTACCTCAATATACTCGTGCCATTGTGAATGTAGAAAAGCGGAACTAGGGACGGGTGCCTGTTTAAATTTTAGATAG
Gma.3663.1.S1_at	BQ630452		0	No Homology to Known Proteins			TGGAATAGTCTATTTTGGTTGTTTTGACAGAAGATGAAATTGAAGAATGTGTTTGGGCTAGTGTTTAGGTTCAAATAAAACATCTAGTTTTTCTAGGGAGAAAAAAAGGTTGCATTGCAGCTTTTGGGACCTGGTTTTAGTNNAAGGAAATAGTGAGAGGATAGTAGTTTTAGGCAAGGCTTCTTTTTCCTTTTTTTACCCTTTTTATAGTAATATTATAAGTTGTTGTAANAAGATAGGATAAGCGGGTCGTTTTCATTTGCCTTATGGTTATGGTGATGACACTGATGGGGCTAAAGCGCAAGGTATGGTATGGTTCAACGTTGGCCAAGTTTCAAGTCCAAGTGTTGAAAATTGGTCGATTACCCATGTGTGCCTTTACTGAAAATCCCTGCTCAT
Gma.3681.1.S1_at	BQ454069		0	No Homology to Known Proteins			ATTGACTCTGTCTGGGATTTGTTATTTTTTTCTTCCTCTGTTGAGGCTGTTGTGGCCATTTGCGGATATGAAACTATTGTGTATATGGGGAAAAAAAATCAATTTATGGGGGAATGGTTTGTATAGAATGGGAACAAGGAACTATCCTGTTATTTATCAATGTTGTTTATCATGTAGCCAAAAAATGTGAATGTCTGTAAAGATGTGAAGTTGTGAACTGGTTTCTTGCCATTGTAGTTGTGATTTTAAATATTNGATGCACTGTAAAGCACTGTTTTATCAACCCCTATTT
Gma.3714.1.S1_at	BG156642		0	No Homology to Known Proteins			AGGGTTGATTGATGTTTTGCTGCCATTGTAATATGTAGCTTTTAGTTGCACCTGTACTTGGTTCTTTTGGGGATATNTGGGAGNTTGATGTATTATATATAAAATGTGCCATGGATAGCTTATGTGGCAATGAGAGTACAGATGGCTGTAAATAACTGCATGTAGTGTAGCTTCAAGATTCCTTCCAGTTTTCTGTTTTGGATCATCATCAGATTTGGCCTTTTTTCAAGAATTGTGCAACTGTATTACATATTCGTTGAGTTTAGATGTCTGAAGAAGGAGCGAGATATCTGCCAGATGATGAAATAATGCATCCTTATGTTTCGCAAAGAAGCAGGGAAGGACATTATGACTCTCTGCTTGAGGTTTATGTTAATTGTCCTTCACTTGAAGGAAATT…
Gma.3839.3.A1_at	CD396897		0	No Homology to Known Proteins			AATTCTGAGTTGGAAAGTGTGAGCCGAAACTCTTGCNNGTCCCTTCGGTCAAATCTGTTTTGATTGGGAAAATGATNCGNNCTCCCTCTTCATTTTTAGGCCTTTTTTGTAATCACAATGTGTCGATCTTTTTCCAACGTCTTCAAATTGTAATCTGATATACATTTTAAAGAGAATCATAGGGTTTTGTATTAGCAAGTAAATGATTTCTACAGACAATTNATAGATAGGGAATAATTGTCCCTCAGCCATGTATGAACGACAAATTT
Gma.3872.1.S1_at	BI967563		0	No Homology to Known Proteins			TTACACATCATACACCTCTTACACTGACTCCTATTCTAATTACTACCCCGCTTACTATTCTGGCGCTCCTCCCCCTCCCCCNCCTAGACCCTTCTTCGACCGTTACGCTGGGCCCAGTGGGCCTTCTGCTCCGCTTGATTACTCCTCCACTTATGACCCCATGCCCAAGCCTCCCAAAATGGGCCTCGGCGCTGGCCTCGCCATTGGCGCTGTTGCTGGGGCTCTCGGCGGGCTTGCTCTCGACGAGGGCCTTAACTACGAAGAGGACAAGATCGCCGAGAGGGTCGAGAACGACGTCGCTGCTGCTGCGCGCGACGATTACAGCGATTACCGAGTGGATTATTGAACTCTCACTACTACCGGTGTTGTCTTGAGGTTTGAAATTCGAAGGGTATTTCG…
Gma.4110.1.S1_at	BU084188		0	No Homology to Known Proteins			GGAACATAATTCTCTGAGTGGCATGAAGCAGAGAAGCTATGGCCACATCTTAGCAAACCGGCAAGTCACAAAAAGGCAATGGACTCTCTCTCATTAAAGGGTCCTTATGGCTATGTATGTATTGATTCTATTGTAGTTCTTCTTCTTTGTTTCGGTAGAATGTATTAATAAACAAAGATGTTCTTCCTTTGAGAAGCTACATACCAACTTGTGTTGTCCATAACACTCAATTTGCAGATGACTAGAATCAGGCTTTCTCTTCAGTTTCTGCAAATGAGTAGGTAGGTAATTATGACCTTATATCATATCCCATGTGTGTTAGTGTGTATGCTTGCTATGTTGTGACCTTA
Gma.4149.1.S1_at	BQ473865		0	No Homology to Known Proteins			ATTCAGTACCTACACGTCATTCTACCAACGGTTTTTCTTAAATTTACATATTAGACTTGAGTGTTGTATTACTTGTTTGTGTATTTCTTTTATTAATACTAATCATTCAAACTTTATAAATTACAATGCTAACTAAATTTACATCATTTAGACCAGTGGAAACACAATATTTCTGTTGTACACTTTTTTTGTTCTGT
Gma.4551.1.S1_at	AW394473		0	No Homology to Known Proteins			ATTGCGGTTGTTAGTGACGCCACGAGCGACTTGCGGAAAATGTTACGGCTTGATTTTCCCTAATCCTGTGGCGGTTTGTGAATGAACGAGGATTTGAACGGAGGTTGTTGGTGATTAGGGCATTGTAGTGCTCGATCTTCTCTTATTTTTTCAGCGGGAAGGTCGTGTCACGAATGCAAGTCTCTTGTTGTTTAGAACTTTCTTCAGATTGCCGTACATACATGTTACTACTGGGATTAGTCTTCATACTTTTTAGATTAATTACTTTGTGATACTAATTATTAGTTTTAAGGAATAGGCTTCTGTATATCTGTGTAATGCTTTGTAAGTATTTAGGATATAGAAGCATTTTCTTCCTCTCTCAATTATGTGTCCTAGTCTTTTAAGTTTAATGTTTCT…
Gma.477.1.S1_at	BM308020		0	No Homology to Known Proteins			ATTACTACTTTGTCTCTGCGTTTATTCTTTTGCATTCCATCACAGCATTATTTTAATNTNTTAATGTTAAAAAGGCAGGCACCGGTTGTAATTTTTATTTATTTTAGGGTAGGGGAATGTAAAATATTTGTTGGTTGATCCCACGAGTCATTGTTTAATTATCACTAATAATTCTGCTTTTTAAGTCAATTGCTCAAG
Gma.4808.1.A1_at	AW317160		0	No Homology to Known Proteins			TTGTCACAAGTTTTCTCCGATTCCATTCCAACCTCAACAACAACAGACACACCCCATCCACTTCGATCATCATCATCTCCCATTAATCTCTTCATAATCCCATATGTTCCACTTCCTAATCCCACAATTGCACACAACCTCGTTCTAATCTCAAACTTTTCAACCCTGGGTACTCTCTCTCCTTCCAATATTCCTTAGCANCNCATTTATAAAAACCATCCAATTATGTAACTCTACCCTTTNTAGTAGCATATAAACTCCCCCCAAAAAAAAACCAAAAAAAAGACTTTTTTTTTATCTTCATCTTTCNAACCTCAAAGTTTTCAAACCTGGGTTCCCTATCTCCTTCCAATATTCCNNNNCNNNNNATTNNNNNANNNCNNCCNNNTATGTAACTAT…
Gma.4892.1.A1_at	AW310404		0	No Homology to Known Proteins			GTTGATACTTACTCCAAGCCTACTAGTTTTAACCACAAGGTTGTACTTGATGTGATNNNNNCNCTTATAATTNCGATTCCTTCCAATTCGGCTTTTAACCTTCTAACAAGACTGAGGNGAGCCTAAGTATGATATCATCAAGGTTCTGGAGGCAGCAGTTGAGCTTTTAATCTAGTTGGAGGAAAACATTGTGGGTGGGACAAACTGCCAGGGGAGTCTGAAAAGTAGGTTTGCTTGGTACCAAAAAAGATTAGATTGTAATGAATTGTGGTTTGCCTATATATTTCCTCAATGTCCATCAATGGGCAAATATAGCTTGCAGTATTGTAATTCAGGCAGTTTGTACCCTTTTTTNTGGTCTACAGGCAGAGGTGTACCTAA
Gma.4959.1.A1_s_at	AW310425		0	No Homology to Known Proteins			TTTTTATTTCATTTCCCTCGTATCATACGAATGAAGCTCTGCTGCTTGGAGAAGTTACTTTANGCCTCCTAAATGCAGAGAGATAGTGCAGAGTGTACAGTGATTTGAGCGGGNCAGNCCACATTTGAAATGGGTGTTGAAATGGTTGCTTTGTAAACTGATTTATTGTCTTTCGGANTGTTCNAACTCCNGAAGTGTTGGGAAGGAAATGATGGACAGGCCTAAGTGTAAGCAAACTGTGCTGTAATNTTTTCTTGATCTCATTCTCATATGTTCAATTC
Gma.5148.1.A1_s_at	BI971116		0	No Homology to Known Proteins			TGAGATGTATTGCATGTTTGACACATGACATAGACATGTTAGTTGGTTTTCAAGTTGAATTTCACTTTCGTCAGTGAGCCATGTTAACTTATAATTATAGGTGTGGTTAAACAAATCAATCTGCAACCAGTTCATTAACTTTT
Gma.5242.1.A1_at	BF596482		0	No Homology to Known Proteins			GATACTATTGTCTATCAGTTTTGACTAATGTAACGGGTTCCTACAATACGATGACATTAGACTGTTTTAGCATCAGGTGTGTCCTTGAACTTGGAATCAATACAGCATTAGCATTGCTGTGGTGCTATGTTGAACACGTCAAAAAACAACTACAGTTGTACCTTTGGGCAAGAAATTTAGACAACATAATTGTGTATGGAAAGAATATCATGCGGATTTGCATAATCTGTTGAT
Gma.5273.1.S1_at	AI965477		0	No Homology to Known Proteins			GGTTTAATCAATTAGAGTCCAATCTCTTGGCTCTTGAAATAAAGGCATGCATTAATCCGATGTTATTTTCTTGTATTAGTGTGGTTGNNTTTGCTTNGGTCACNTTGGCTTTGTATTTGGTTGAAATAAAGATGCACATGCTACATGTATGCAATCATAT
Gma.5273.1.S1_s_at	AI965477		0	No Homology to Known Proteins			GTGGAGGATGGTCATGATCATCACCATCACTNNCNNNNNAAAAAACACTGGCCTCCTACCACACAAAATGAACCTTCGAAAGTAGAAAACAAGGATGGTCACTATAAGCCTCCCCACAAGAAGCATCCTCCTTCGGGAAATTAATTAATNTAGTGAAGCTGCTACGTACTACCATGCATGCACTCTTGTGAAAATA
Gma.5318.1.S1_s_at	BM092330		0	No Homology to Known Proteins			GATTATAGATGTCTCTGCATCATGCTGACTTGGTGCCTGTTAACTGTAATGTGAAAATACTATCTTTTTTATAAAATGTTGTTATATGTAATAAAATCCAACCCTCTCGTGATTCTCACGAGTTTCCCAGACATCTAATTTGCATTGAG
Gma.5387.1.S1_at	BM093934		0	No Homology to Known Proteins			CTGATGGATAGTTTTTATGTTTGACACATGTAGATTTCTTGTCTTTCTGTGGGATTTATGCTGTGTTGGTTGTCTGGGGGAAGTTCATTCTTTTTCCAAGCCTTGTCCTAGCTATGGATCCACATCGGCATAAGCTTCATATGAATGGGGTTGAAACCATAATCTCCTTTCCACCTTAATACTATGGAAATGAAAGTACTTCGACATTTGCACCAAAAA
Gma.5475.1.S1_at	BU577501		0	No Homology to Known Proteins			TTGGTCTCTGTTGAGTTACTCTGTTTAATTATCTTCTTAATTGTGTTGGTTTCGTTGGTGTTTGTTCATTGCTACATAATTTTGTGATTCTTTGTTTCCCGGCTTCATTTGTTTTATCTAGATGACCATGGTTTCAATGTACGTTTAATCATATGTAGA
Gma.551.1.S1_at	BU551297		0	No Homology to Known Proteins			GAAAATCATCAACCGTTAAATTCCTTTGTTTTGAAATGCATATGTAAATCATATATTGGCTATTCCTGGGGATACAGAAGAAACTTGCCATATACTGTGATGATACCAAAAGAACTTTAGTGTGGTGGATTGTTGTTTCAATTGTTGGAAGGAGTCGTCTGAGTTTAGCTTATTATTGGTGTTATCTTTCTCTTGTCTAAGTAAA
Gma.5584.1.S1_s_at	BI967548		0	No Homology to Known Proteins			TCCACCTTACCACTACTAGGTAGCACTTTCTCTTCACACCCCCACATGGATGCATACAGAAAGTGTGAAAATGAAAGTCATGGAGTGGGAAGATGCATCTGCAGCTTGCAGATCCACAAAGAA
Gma.5595.1.S1_at	BM139888		0	No Homology to Known Proteins			ACAAGCACAAGCATGGGAAGATGAAGACTAACTTGAGGCTTGGGATAACGGAGTTGTTGGAGGATTTGGGTGCTGAAGATGATGAGCATGTGGTGGTNNCTTTGNTGCCCAAGTTTGGGAAGGGGCATGTCATCGTTGGTGGGATCAAGATAGAGTTTCACAAGTGAGGATGGCGATAGTTAATTGAATTGAAAAAGTTTGAATGAAATTAAGCCATATGCTTGCTGGTTAATTTCACTGTTCATAACGAGGTTTGCACTAGGTTTGAAAAATGATGGTTGGATAAAAGACGTCCTTNGAGTACCAAGAGGTGAAATCGTATCTAGCTATAG
Gma.5633.1.S1_at	BM139864		0	No Homology to Known Proteins			GTCAAGGCCCATCTGTAGCCCCGTATCCCAGAAGTTCATTCAGCAACCTTCCGGGTTCTCGACCAGACAAGAAGCATGAGTTGATCAAGAGAATCCTTAATATTTCATCCCCCTCCAAATGATATCACTTATCTCTTTTTATAATTTATGCCTTTTTCCACTCCTCATGTAAAATATATTCCCTTCGTCTATGTATTATAAAATAAACGCTCTCTTATCACTTGTGTTTCNNNNNNNNNANNNNNNNTTTTTTCTCTGTTATATACCATTGAAATTGGCGCTGTTTTCT
Gma.5653.1.S1_at	CD404693		0	No Homology to Known Proteins			GTTGATTCCAGTGCATTCTTGTGAGCAGACGACAAACGTAATTCTTAGGAGTCATCAATTGTTAGAAGGTTTGCATCCTAAGATTTTTTAATATCTACTGGAAGCGAAGTGATTCATAGAGATGTCTGTTGAAAAGTTGCTTCTGATTATAGACTTGATGTCCATCGAACAATATAGTTTCATTAGCTTATGAGCACGGGTGGCAAGGTGTGCGGTTGAAGGTTTACTAGCAGCTATTACTATAGGCATGCAACGTCGTACAGCAAATAAAAAANTTCAGCTTGTCACCTATAAGGATTTTTATTTTTTTTACTAGAGCTGGCCACCTATAAGTTGGTTTCTATCATACTCTGTTTCTTTCCTTCATTTCATGAGCGTAGGGGAAGATGACTCCTGAGT…
Gma.5699.1.S1_at	CD404425		0	No Homology to Known Proteins			TCTTCTTCCTGTGCCAGCCAGGTCANGTACGCGACNCTCGTCGCNAAANNAATAAAACCTGAGAAATCGAGAAGGGNTTGTGTAAGGCTGCANACNNGTTTNTTGTAATATGGGANNNAAACNGAGAAGAGGTTGTTACAGTGGATTGAGGTNAGAGGAGAAAGTCTCTCCATATTGATTTGAATTGTTATGGATATTCAGAGTTGTGAAATAAAAATGGCTGAGAAAGAGTAGGTTGCAGAGAAANTGTGTATGTATAGGGATGAATTTGGAGACCATAATTCAGGGTTGCATAGACAGTAGTGACACTTTCTGTTGC
Gma.5728.1.S1_at	AW278139		0	No Homology to Known Proteins			TTCCATGCACGAGATGCGTTTAATTTTTCTCATCACCCATCTCGGACTTGTGTATTGTTGCATTTTCCGAGAGCTGTTCCTGTTTCATAA
Gma.5755.1.S1_at	BE611571		0	No Homology to Known Proteins			AACAATGCAACTTCACCCAATAACCCCCATAATCCTACTCCTATGCCTGGAAGGAATCACTCAATTGGAAAATACAACAACAGTGGCACTCANAAGATCAAAGGTCTGAGTAACCAAACGGGCTTCACCGAAGGCAATGCTAACGGAGCCATCAACTTTGGCAGTTTACATGCCTAAGTAAATCGATGTACCAAGATCTTGAAATACATAAATAATAATGTGACGCATATATTAAAATAAGAGCTTCACAGTTTGAGTGTGGCTCCAATATTTTCAGCT
Gma.5847.2.A1_at	AW349427		0	No Homology to Known Proteins			GCTAGGTGTCAGGTTTGTTGGATTCTCTCTCGCATAGTGATGCTTGCATGCATCATGATGTCTCCATCTGCCCAAGAAATCCTTATAAAGACTTGGTCTTCACACTGACATGACATTATTTTTCGGTAATTATTTTNCGTAAAGTGTCCGTTTGTTTTANATTTTGGCAGAATTGGTCTTGATTTGTTGAATATGATCGAGATGTGTGTCC
Gma.5854.1.S1_at	BM568053		0	No Homology to Known Proteins			AAGACTGGTGAGGATGTGCTTATCACCATAAGTTGGTCATACACAATCCTCTTGCAAATTTCAAGCATCGGTTTGGTGGTCACTCTTGACATTGGTGGTATAAAGTTGGGGCCATTTTCTTGTTGCCTTTTATAAGTNNNNGNNNNNNNNNNNNNNNNNNNNCTAGACTATGATGGTACCAGTGTACATCACTATTTGTCTTGGTTTGCTCTGGAATCTAAAAGCAATTTATGATACCAAAGATTTTTAATAGTTGTGTCAATTGTCAAAAGGATCTTGTGAACATTTCAGGGGATCAATATAGATAGTTCGAGTTTTTGTGTTAAAAGTGTTGATAGATTAGAGAACACAGATAGTGATTTCTCCTCACCCAAACCCCCCCAATTCTTTAGAGGATAC…
Gma.5942.1.A1_at	AW432241		0	No Homology to Known Proteins			TTATATGTTCCCCAGGTAGCAAAGTAACGAAAGCCATTTTGTCATGTTGAGTTTGATATCATTCTCTTGTTACTGTTTTGTATTGTATATTGTGAATTAAGCGTATAGGACTCATCTCTATGGAAATGGATA
Gma.6015.1.A1_at	CD395399		0	No Homology to Known Proteins			ATAGACATGCCCCATTACATAGAATCCTAAGCAATAAATAATCACNAAATAACAGGAATTTAGAACTGTGGNTAAAGGAAAATATATCTGCATCATTTTTCACTGGTTTTTCACCATGTGAGTGGGATGAATTGGTGACTATAATTGCACTTTGATTGAGCCAATTGGCTAGTTGTTTTCTCCATCTTATGGTTTTGTCTTTCGCTAAGGTTATATAC
Gma.6165.1.S1_at	BQ611864		0	No Homology to Known Proteins			GTACATATGCACAATATATGTTTGCTTTATGTAATCCAGCAGAATTTTGTTGCCCATCCTCTGTATGTTCTTTACTGAGTGTAAGAGCTGAGGTTTCTT
Gma.6187.1.S1_at	BF324343		0	No Homology to Known Proteins			GAATTTGGTTCTTCTGTGCAGAAATGCTAAAAATTAGTATATCTGAGCAATGAGTGAGAGAGGATACAACTTTGGCAGTTTAAGAAATAATTGACAGAAAGCAAGAAAACTCATCTGCTCATGCTGCTCAAGTGATTTGTTCTGCAACATCTTTTACGCCTTGGTCTAGTAGAATCCCAATTGGTGAAGGATTTTATCAATTTCTTTAGTTATATGCTTCTCACTATGACATTTGCACATTATTTGGTTGATTAATCTTCACAAAAACTCTACTTTCTCGT
Gma.6274.1.S1_at	CD392870		0	No Homology to Known Proteins			TTCCTCTCAAGTCGTAATCATGACAGCAATGGCGGTCCTTCTCGCCGTCGTCTCCGCCGCTCACGCCGCCGATGCGCCGGCACCTAGCCCCTCCTCTCCCGCCTCCGTCATCTCTCCGTCCTTCGCCGTCGGTTTTCTCACCGCCGCTGTTGCTCTCGTCTTCGGTTCTTCTCTCAGGATCTGAACATGCTGCGCTCCGCCCTCTGGATTTTCACTTTCTTTTCTATTTTTTTGTGTGGATTTATCAGAGATCGAGGCTTGACTAGTAGTAGAGTATAGTTTCCCCTGTATTGATGTGCAGAGATTTCATGTGTTCGTTTCA
Gma.6280.2.S1_at	AI938985		0	No Homology to Known Proteins			ACTCACTGAGTACCCGTTAAGCAAGCACTACTGTCGGTATAGTGTGGTCTAAANNANGTTGAATAACATCTGGATTGACACTTCAAGCTTCAATTTCTTGCTTATGAAAATAACCCAACATTACTTATATGGGATTTCAAAAGTTGTTTTGCACTCATCCATATAGAATCAAAACCAAAAGTGTTTAATTTTATGTGTTCATAATGTAAAAAAGTTTGTACTATCAACCAATCAGAAACTTATCACACATGACAGTTTTTGATTGAA
Gma.6296.2.S1_at	CD392554		0	No Homology to Known Proteins			GCTCCAAGCACATGATGCCGTTGCAGTTCAAGGCGCTACCCTAGAAGATGTGTATGAAAATTCTCGAGTGAAATTTTCTCTATCTGTAGCTTGGATTGGTAGTTGTTTTAAGTAGAGACGTTCATGTGTCTCTCCCGTGTTGGCTGAACATTTAGCGCGTATTATTTACCAGAAAAAATCTCCTTCTAGTTGTTGACTTAGGATATTGTATAATTGAGATATTTTCATGCTTGAATGGTGGTATCCGGATTTCTATATTTTTATGTTGCGTATGTTTTGAANNNNNNNNNANNANTGATTCGGTATTCTCTAACATGGAAGTGAAAACTTCCAAATTGCCATGNANNNNANANNNNANANATGAGTGTGTTTGCATTGGTTAGGAAA
Gma.6333.2.S1_s_at	CD396361		0	No Homology to Known Proteins			ATCGGCAACGGCTACGAGAACGTCGAGATGGAGCACGGTGCTATGGACGCCAAGGACCCGAACTTCGAGGATCCAGCGGAGATCGCCGCCGTGTGATCGCGGTGGTTTCCGGTGACGAGATCTGTACATACTAATAATTGCTAAGAGACGTGGTTTTCGAATTCAATAATATGAAGCAAGTAGGAGAAGAAGCGCTTTCTGTGATTGATTGTTATAGATCTGATCTGTCTCTGGAATTTGGTAGTGGCATGGCACTTGTGTTGTTGTACATATATCGAATGGTCTTGGAAGTGCGTGCACTCATATTCGCATTCAAG
Gma.6337.2.S1_at	CD391354		0	No Homology to Known Proteins			AGGTGTGGAACTGATCTTAGCTTACGGAGTATTGGTAGGAATAGTAATGAAGTATTGTTCTTTTGCACTTTGGGAAGCATCTCATATGGTTCTATCAGTTCTAGATTGTCGCTGAATCCGATGCTCAGATTGTATTTTTGGTTTCCTTCAATGTTTTATCTTCTTCAATATTCTGGCAGTTGTCTTATACTTGTTTTGTTTACTTGAATTGTTAATGTGGCAGAGATTCTTTTTGGAAGATGTTTGTGCGTGGTGTTTTGTTATTTATAATTTGGCCGGGTGGGTATAATAG
Gma.6389.1.S1_at	BQ610837		0	No Homology to Known Proteins			TTTACATTTGTGGTAGCATAGGAGCTTCTTTTTTCTTTTTTTAGTAGGATCACAATGCCATTGGGCTGAAGGTTAAGACCAAAATTACTCATTGCTTTCAATAAGGCTTTGGCTGCGGCTGTCTGGGTTATGATTTAGCAGCTTTCATATTAATTTGTTCCTTTCCATCTTTGTTATCCGAAA
Gma.639.1.S1_at	BU081643		0	No Homology to Known Proteins			AGAGGCTAATTAATTTGTCTAACATGTTTTTAGAGTTTTTGTGTTTAAGTGGAATTGTTTTGGTTGAGGGGGGGCTTGGTGGTTGTTGTGTAAGAGAGAATCTAAGTTCTCCTGCTGACAACAGGGTGTCCTTCGAATCATGGTGTTAGATTTTTAAAAGAATAGTTACATGTAGTAGTTCTTTGTTGTTGTAAGGTGCCATGCCATGATGACAACCCTTTGTGTAAAATTTATGATATGGATATTTCAGCTTGCTTAGGTTACATTCCTGGTCTCATTGTCTATCGCTTATCCTTGCTGAGGATTCAATTTAGTA
Gma.6434.1.S1_at	BQ612772		0	No Homology to Known Proteins			CAGTAATATACATGTCTAGTTAGGTGTGGAGTGGATTTGCAACCCATTCATTTCATCATTGTACGTGTTGTTAAACCTTATTATTGGAAACATCAGTATACATTTTATGGA
Gma.6470.1.S1_at	AW760032		0	No Homology to Known Proteins			GTTCAGATATTGTCCGGTCCGAAGACCTTTCTGCANNNNNNNAAANNGTGGGAGCNCGCAANCTTGCATAAATACAGAGAAGAAGAGAAGAGTGAAGAGACGAAGGATGGGGAAGGCAAAAGAAGCGGCGGTGGTGGCGGGAGCCCTAGCATTCGCGTGGCTCGCTATAGAGCTCGCTCTCAAACCCTTCCTTACCAAGGCACGTGCTTCCATCGACAAGTCCGACCCGGCACGTGACCCCGACGACGATGCTCTTCCTAAAACCACCGCCGACGACGTTCCCGAAGCCTCCGCTGACGACGTGCCTGTCGCTGCTGATACCAAAACCACCGACGACGCCTGAACTTATCTCATTCATGTTATTTTGAATGTCCTGAAAATTACTGTCCAAATGAAATA…
Gma.6515.1.S1_s_at	BQ627548		0	No Homology to Known Proteins			TACCATCCTAGCGAGGTCTCTAATCTTCGGATTCTCTCTCTCAAAGATTAATGCGCCTATTAAAAGTGAAAGCAACTTAGTCATTGAATGTTCTTGTTTGCAGCTTTTGTGACAGCGTATCACATATGACAGACCATGAATTTAGTCAACTGTGCTTTTATC
Gma.6573.1.S1_at	BI941802		0	No Homology to Known Proteins			GATCGGCCACGGCTACGAGCAAGTTGAGATGCCGCACGGTGCTATGGACGCCAAGGACCCGAACTTCGAGGATCCTGTGGAGATCGCCACCGTGTGATCGCGGTGGTTTCCGGTGGCCAGGTCTGTAAATAGTAGTAATTGGCGAAACGTGTTTTTTCGTGTTCAATAATGTGAAGCGAATCGGAGA
Gma.6605.1.S1_s_at	BM139615		0	No Homology to Known Proteins			TACTGTTATGGTTGGTTGGTTTCCGTGTTACTCCTGTCCTGTGGTTCTCGTTTTTG
Gma.6627.1.S1_s_at	BQ629303		0	No Homology to Known Proteins			AAGATGCTATAGATGAGGACGAAGATGAGGAGGTTGATAGGTTCGGCTTCTGATGTGATTCGTCACCAGTTGGACTGCATCAGAGCTAGATCTTTGTATAGCACCTTGACCTTCAT
Gma.6629.1.S1_at	BM523674		0	No Homology to Known Proteins			GTATTGGGTCTTTGGAACGTGATAAGGAAGATTTTCTGTTGTTGTTGTGAAAGAGGGAAGACAATGAAGGCTCCAGGGAGGAATATTCGCATTTATAGAGATGATTTTGAACGTAGCCCTAAGAACTANTTCCGTAACTTGCGCAGAGACCAACGTAACTGGCGCAATAATCAACCTCATACGATTTTGGTTTGAAATCTCAAACGTGTAAATCCACGTCAAACTAGAAGCACCTTTCAGTTGCTTCTGGTGAAACTCNTGAAAAAATGAACGTCGTGCTGTTTTATTATATTAAAGCTTGTCTGTGTTTGTGTATATGGTGCATGTTTGACGTGATTTCGGTAGATATGGTTTGAACAAATGGNNANAAAGATTCTGTTATTTGTGTTNCACTACATG…
Gma.6681.1.S1_at	BQ299091		0	No Homology to Known Proteins			TAGGTGTGCCTGCCCTTTCTTTTTTCCAATTCCCCCTTTTTTTCATATTCTTATTTCATGAAAACCACTAAATCCCTTGTAATGTGGATAATTGAAATGAAAAAAAAAAAAAGAGAAATTGAATTTGTTTTAAAATTAGATTTGTAGATCCAAATGTAGGAGTGTTTGGGTGGGACTAATTATGATTGCTATTTCAGGAACAAGGTTTTGATTTGATATAGAGAATTAGAGATGTGCTGAGGCCTGATGATGATGGTGGCGGCTATGATGTGAGAAGCCTATGGTTTAGTGGATTTGGATTGATTAACTTAGAGGCTTCAGCAGATATGCCATTTGTTCAATTGTAAATGCATTTTGACTTCCCAAATCTTCTTAGTGCTTTTTCACTTCATTCTGAAC…
Gma.6758.1.S1_s_at	BU760603		0	No Homology to Known Proteins			TGCTGCTGTTGCCTGTTGGATGCCTGCTTCTGAGAAAGAAAAGAGAGGTTGCTTTGCACAAATTGGATTTGAAACTGTGTTTTGACTTTGAACATGACCATTATCGCTCTTAGTTTTTATTATTTTCTATGTTGATTTACATTTCGTGGATATGAAATATTGTTCTGCTTCATTAACAGGAGGATTCGTGGCTTTTTGTT
Gma.6758.2.S1_at	BG155059		0	No Homology to Known Proteins			ACCCACTATCCCAATTCCAATAAATACCTTCCTCTCTATATTTTCGCACAATACCCTCTCACCCTTCAACGATGAGTTACTACAATCAGCAGCAACCACCCGTCGGTGTTCCTCCTCCCCAAGGTTACCCACCGCCGGATTCTTACGGAAAGGACGCGTACCCTCCGCCAGGGTACCCGCCGCAAGGAGGATACCCTCCGCAGGCGTATCCAGCACAGGGGTACCCTCCACCCTACGCGCCTCCTCAGTACGCTCAGCCTCCGCCGCAACAACACCAGAATTCATCTGGCCCAGGTTGCTTAGAAGGATGTTTGGCTGCTCTCTGCTGCTGCTGTCTGTTGGATGCGTGCTTCTGAGAGGAGAAGAGGTTGCTTTGCACAAATTGGATTTGAAACTGTG…
Gma.6770.1.A1_at	BI700473		0	No Homology to Known Proteins			TTTTAACACCTACCACTTGCATTGCCATATTGATTGAGGAGTATGTTCTGGATCCTTAGCTCTTGAAGGCTGAAAGAAAGAATATCGTATGCTAACAACCAGGCAGCGAAATGGCTGGAGCATCATACTTTTGCAATAGTGAAGTCCAGATATGAGTTGCACATATCCATGTATCATTTATCTGTTGATAGGTGAAAGAATCAACTGCACATTGCTGGTTTATTCTTCATGTGATTGGACGTATTGAATCCAACATAGTGATTGTTCTTTTTGATCAATTGACGGAATTGTAACTTTTTTAATCCATTTACTGTCTTACCGCTCTTGGATTCTTTTTTCCTTCTTTTTAGACTGGAAATACCNNNCGAGACCTTGTATGTGTATCCGAAAGCTGTCTAC…
Gma.6855.2.S1_a_at	CA936064		0	No Homology to Known Proteins			GAAGGATATCCAGAAGTTACTTGCTGCCTGAGTGTAATTCAGAACACAAACGAGAGCTGTATGTAANAGCACGAACCGAGTGATGTGTGCACAATAAGTTAAAACTGAAGATGAGCAATAAGTATAGCTATGCAATTTACTTTGGTGTCTTTACTAAAGAAATTATCAGTTTAGGGAAGAAAATTATACTGTATTACCCCAAAATGATT
Gma.6920.1.S1_s_at	BE610331		0	No Homology to Known Proteins			TTAGCCCGTGCCCTCATATGTGTTCATCAAGCCCTGTGTGGTTGTTGCTCTAGCTCATTGCCTCATTTCTATTGTCATTGTGTCATGATATCAAAGTCAATAAATTGTCAAATAGAAATCATCATCATGATGACTCTTAAGGTACAGTCAATA
Gma.6956.1.A1_at	BI968103		0	No Homology to Known Proteins			GAAGAGTCCGGGAATGCAATAGAATNNACATCGAGCTCTTCAAAAAATTCTGACTGATTTAGCATCATGATCTAACAGTTCAATGTTGCNNNNGANATCAACTCCAAGACTGTATATTTACATTATCTTTTTGTTCGATCGAGCAAGAGGAGTTGGAGCTGGTAGGAAAGGGGGCTCAAAATTTTTTCCTATAGAGGAGCCTTGCAAGAGTTTTTGGAAGTTGAGGTACATAACCCGAATGAAGTCACTGATTCTATTGTTTTCCGTTATTTTCCTAAAATTTTGCATGGAGTACTGCTACCATCCTACAACTTTAGAGAATGGCCTAACTGAAGCTTAAAATTTTGGCTAGCTGTGAATGGACAATGTGACACTTTGCAGTTTCCTTGTGATAATGTG…
Gma.6981.1.A1_at	CD398637		0	No Homology to Known Proteins			TTTCAAATTTCAAGTGTTGCAGATTGGATAATGTGTGTACTTGACTACTACTTATGCTAGGGTTTATGGTTTTTCTTTGTATTTTTCTTTTCAAAAGAAAATGTAACCAATGAGGAGATTCTTAGTGCATACAACTTCAAGGATGAATATGTTGCAACTTNGTATGAGGNNNNAAGATTGTTTAAGTAGACCAGTGCTTCAACATTGGCCTTCTTTTGTTTTTCATTTTCCCATTTGTTGGTGTTTCT
Gma.7042.1.S1_at	AW350007		0	No Homology to Known Proteins			GGTCGTTATGGAGGAAGCTTTAGCAGAGGGTATGATCTTGGTGGGTATGGCGGACCTAGTGAGAATTATGGAGCATATGGGGCAGGTGGGGGTTCTTCGGGTGGTGCTGGTGCTGGTGCCGGTGCCGGTGCCTACCAAAGTGGCTATGATGGAAACCTGGGAGGGGGATATGGAGGGGCTAGTGGAGGCCCCTTCTATGGGAGCACTAGAGGAGGATACAGCGCTGGTCGATATCATCCTTATGGAAGATAAGATTGGAAACCAAGCATTTATAGTCTAGGACTAATATGTCTAGCATCAAAGCAGGTTTGTAGTTTGTGTTTTGTTCATCAGATAGATTATATACTCTTTCAAAAAAAAANNNTTGTCAACGTTACTTTCATTTATGAGCATACCCAT…
Gma.719.1.A1_at	AW133378		0	No Homology to Known Proteins			ATGCCCTTTAGGTTACCCGTGCATTTTATTTTATCAGTTCTCAATGTCTAACCTCAACTGGCTGATCGAATTAGTGATACTTTT
Gma.7577.1.S1_at	BE330075		0	No Homology to Known Proteins			TGTTGTCATGGCCATGTTGATCATGGCAGCATCAGCTGCAGATTCACCAGCTCCAAGTCCTACATCGGATGCTACCACCTTGTTCGTGCCAACAGCGGTTGCTTCACTCGTTGCTCTTGCTTTTGGGCTTCTCTTCTGAGTTTGTCAACAATGAAGCAAGCAACTAATTGTATTGTATGGGATTCATTGTGTTTTCATCATTTTTATGATTCATATTACTTTGTGACACATTCATTTCCCACTGTACTTTTTTGTT
Gma.767.1.A1_at	BU083371		0	No Homology to Known Proteins			ATGGCAATGCTGAAACTAGTTACACTAGTGGTGCTAATGCTGGTAATTACCAATTCAATGAAAATTCTGGTGGAGTTTTTGGCTCAGCTAGCGGTGAATTCAGCAGCAACCAAAATGACGCAACAGGTGCAGACAATGATNAATTCATTGAGCCACTTGAAGACAATGTGAGGGAGAACAATGATGAACCTACTGACTACGCTCAGAACCGCTGATGAGAATTTTCACCTTGCCTAGAGCAAGTTACTTCTTCTGGAGTTT
Gma.7858.1.A1_at	AW733417		0	No Homology to Known Proteins			GATCTGAGATTTCCACATCGAGCAACACATCAAATAGCAAAAGCAGCTCAGACTTCAAAGTAAGACCCTCAAGATCAGGGACTGGTCATGGTAGTAGTCTAAGCTCCAACNNNGATGCTCACAAGCCTCGGAGGAAGAGAAGACCTAAGAAGAAAAAGAAGCAGGTGTAGGCATGATGGCTAAACTGAGCAGTAGAATGAGCAATTGGATTTGTCGTATTCATTCGAGATTCTTACGGTTGTCTTACCTGCTGGGAGTCAGTTTCACTGGTTGATATGATGATATATATGTATTGACTTGTTAGGTTAGATCAAGAATTCGTTACTGTAGATCTTTTCTGCGGGCTCATCATATTCAACCATGGCTTACTGTAAATTATTTTGAATTCTGATTTATTTT…
Gma.7859.1.S1_at	BU082495		0	No Homology to Known Proteins			GATGCCTACCATGTGGAGCTGAACATTGCTAATTAATTGCCTGGTTTGGGTATTTATCAAAGATCAAGGGTTATGCCAATTCAAGTCTTCTATCAGATGGACGAATTTTGAGTTCTTCAATTTGTGCTGTAAGTACTGAAGCTGATTAGAAATGGAAAGAGAAGTGCTGAGCATGTGATGTATAAATAAACTTCGTATTATTAAGCTCCCTTNTGGGTGGGTAATTTGAAAGATCACTCCATATCCTGTTCATTTGGAAAGAACCAAGGCCNCAGATNNTACTTTTTGATNNNNNNNNATTGGATTTTTTNCTCCTGTCATAAAGTTGGTTTTTNNCCTNANAAAAGAGATATATTGTTACTCTTTGGATTC
Gma.7875.1.S1_at	BQ610129		0	No Homology to Known Proteins			TAAGTGGATCGTGCTTAGACCGAGTAAATATAGCCAATACTTGGATACGTCGTGTAAATTAGTTTCACCCTGTTGTTTATGGAAT
Gma.7991.1.S1_at	CD392638		0	No Homology to Known Proteins			GTCGCAGGGTCGAAAGTCCTTCTAGTGAACAGAAGGGTCCACTACACCTCAAAGGTTTCCTCTAACCGTGCCACGTGGTCTAATGTTCTCGCAGTTTCTGCCGCTGTATTGGTCTCAGCAATACTCCTTGTTAATATATGGGCATATGTCAGATCTTAAACTGCTTACATGTAGTGGAAGATCATTTCTTTTGTGCGAAATTTGCCTCCATTGCTTTTTTGCCCGGTTAAG
Gma.8185.1.A1_at	BU548568		0	No Homology to Known Proteins			TGGGCCAGCAAAGCAGAAGCATAGCTATAGTGGGTGTACATGTTTTTGCGCTCATAAATTTATGTGTAAAGTGTAAATTGAAGATGAGAGAGAGAGAGAGAGAAAAAAAGAATACGAGGTCCCATAGCAGTTTAATGAAATG
Gma.8738.1.A1_at	BU764151		0	No Homology to Known Proteins			ATGATCTATATTTTCAGTGTGCTAATACGAAGCTTCTAATGATGAATGATATATGGGTTTGCACCTGCCCTGATGAGTTTGGTGATGATTTTTGTTTCTATTACGGGTTTGATATATTTTTGTGGAACATACGTCAGTTTTACATTTGGCTACACAGTTGTGCGGATGCGTTTGTCTCGTATATAGTAGTTTCATTAATGTGGAGTGCTCAGCAGGTTGTAATGACATA
Gma.8787.1.S1_at	BU765191		0	No Homology to Known Proteins			ATTAAGGCCTCTCCACTCCAAGTCATTCTTACACCACGTCTTTCTGGTCATATTTATGATGAAATTTAAATACTAAAAAAATAAGATANCATGTCATGCATGGATAAATTAGGAATGCTTGGCTTTTATCGTTTTGAATAAATTACGAATGCTANNATTTTATTATTTAAATAAAATAGGAATATAAAACCTGGGATTAAGGAAAAGATTAGTCAAATCCTGAGTCATGGGATTCCTTTTTTATTTTTGGATTCTAATTTCTTATGATTAAGGGAATTGTCTCCCCCTATGT
Gma.8822.1.A1_s_at	BI970193		0	No Homology to Known Proteins			GGGCCTTGAGTTCTCTTAAATTGTTATTATGTAACAAAGATTACTGTAGTCCAACAATTAAGCATGTTATTTGAGTGTGAGTGTGTGTGTGTGTGAAGTGAGATTGATTGATCTTTATAAGATCACATCAACAATTAAGAGAATGGGTGTGGAGTGGGTGGATTGGNAGATGAGTGTGCCCAACGACCAAAGAGAAGGTCTTTGAGTTCTGCTTTCCGGGTTCGGTGGACCCAAATATTAGGAACACAAGATCTGTTACAGGTGTGGTGCATCATTATGTTAAAGCCTTTGTTAGAGATGTTATCGT
Gma.8896.2.A1_at	BU760781		0	No Homology to Known Proteins			TAGTGTCTTTGGCTGCTTCTGCAATGGATTTTTTGACATTTGCGGATGTTTTGCTNAGANACGAGGGTTGCAAATTTTAGGCAGTGAAATCNNAGAGGGTCGTAGTGNTCTTTTTGTGGTCTGCTCGTGTTTTTTGTTACTTGCATGACCNTGGGGNCTTCTACTNNTGTGTCTTGGNNNGCTACTTCTTGTTCAACNNTAATTNAAGTGCCCTTCCAATATATGAAAAA
Gma.8918.1.S1_at	BU762571		0	No Homology to Known Proteins			GATGTGACATACTTGTTTGCTTTTAGCTGAGGCATGATAGTCACTTTTTTTTCTTCATCACATTGAAACTTTTATATTCATGATATAGTTCCTCATCTTTCTTATTTATTAATTGTAAAATCTTGAAATATTATGATAACATTTAAATTTCTTGTTTTGCAGGGAAATGGTTACTTTGTTCGGTTTGGTAATTGCTCAGGCAAGATTGTGGTTATAGCTCCCTAAGGCTAATATCATTCCATAGTTGAATTAAATATACTTTGTCAAGTATAAAAAAGTTGTGTAGGAATCTAGATGATTTACTTAGAGCACCAATTA
Gma.8961.1.S1_at	BU765186		0	No Homology to Known Proteins			TTTCTCTTGTTTTGGGTAGTTCTGTGAACAGATAGTATTAATTTGTTATGTGTATATTAGTTGGTACTTGGTAGATTAGAGAGGGACTTGATACATACTTAGAAGATCTCACTAGCTGATTTCACACGTTTTGAAATAGTCTTTACAAGCTAAATCTTCTTCAATTCCTTCATTGAAGATTGCTTTGACTTGTTTGCAATCTTTCTGTATATCTATAGGACAAGTAG
Gma.9043.1.S1_s_at	BQ299017		0	No Homology to Known Proteins			TATCCTTATGGCTTGTGTAAATTAATTTGACATTCAATGCCCATCTGAACACATTATGGCAGTTGAGAATGGTGGAAGAAGGTAACAAGAGGGATCAAAATATTTCTTCCATATGAATGATAGAGTGGAATAAATAAAATTGCATTTATAGTTGTAGTACTTATTGTTCCTTTACCTAAGTTGTGATCTTGAAATGTTGTTATCTCATTACTTGGCCAGGCCAGAGACTACATTGGTGGCTGTTGCAAACTTGTGACGGCACTTCAAAGGCAGGTTGTCATATGTGTATTTGGACTAACCACATTGTTAATTTTGTGGAGGTCGATGAGCACTGCTCATCACTGGATATTGTATTGGGTTA
Gma.9083.1.S1_at	AW307396		0	No Homology to Known Proteins			ACAACAGGCGTATTATTCCGCTCCACCAAGTGGGTATCCTTATANNNNGCCACCGCAGCCTTATAATGCGCCGCCTCAGAGTGGCTACGGCTATAATGCGCTGCCGCAAACGGCGTCGTATGGGCAGGGGAGCGGTTACGGGTACGCGCCACAAGAGGAGAAGAAGAAGAGTAAGTTTGGTGGGATGGGGACGGGATTGGCTGTGGGTGCGGTTGCTGGGGCTCTAGGTGGAATCGCACTCGTGGAGGGTGCTGAGTATGTTGAGGACAAGATTGAAGATGACGTGGCGGAAAGAGTGGAGGATGATCTTGGTTACGATGGTGATGACTTCTAGAGAGTGGTGTGATGTTTCAGGAGGAGGAGGAGGAAAAAAAAAACAAGGAATAATAATATTTTAAG…
Gma.913.1.A1_at	AW570445		0	No Homology to Known Proteins			GAGGCTTAAGGCGTCTGAGTTGTCAAGGTGGTATCAAATTGCAATGTGGATGAATGGCTTTCAACAAGTTTAAAATGTGGAGCAGTCAAAAAACATTGACTTGTTCTTGGGATTGTTGTATGAATTGATGAGGATCGTTGTTTAACCTGGGTTTTGTTGATAAAGCGTATTATTAAGTCATCGAATGTTTTAGTAGGTAGATGATTATATACATCGACGACCGCAGTTCTCGTATTTATATTCCATTTACCCTTTTTCTGTCGATATGTTGAT
Gma.916.1.A1_at	CA783523		0	No Homology to Known Proteins			GGTCTTTTCTTTTAGTATGAACGCATTTTGTTTGGTAATACCATCTTTGGAGATGACAATCATTGAAGTTGCAGTTCCACCGGCAGCTCTGTGTGTTACACACAGCGGAGAGGTGTTGTTGCTCGTGGATGTGGCAGGAAGGAGATGCCTGTATTCACTGGACATGGAGAGGACAAGCTTTACGGAACTTCAAATTGAAGTAGACACAGAGTTTGTTTATTCTGGTTATTATGCTGAGAGCTTAGTTTTACTGAACAATGCAAGTGGTGTAGTGTCTTATTAAAGTGGTAATGTCATCCCAATCTGATACATATGCAATATATATGTTAATAACTCGTTACATGTATCTGTATTTTCTACACTTTGCGTTGCTTTCTATTAGATATGTTCTGCTTGCTT…
Gma.9194.1.S1_at	BM526746		0	No Homology to Known Proteins			CCATTATTTTTGTCTAAATACCATGTTCTGTGATGCTGGATGGCTGCAGTTGATCCGTCAGTATATGTATTACCTTTTGATTCTCTTTTGCCAACTGGTGGATCCTTATTTCCCCAGGTAAATATAGCCTTGTTTATTGTAAACGTCTACAATGTCATATAGTAAGTATATTTGACTTGAAATGGTCAGATCAGAACTCAGAATGCTTCTGTAATGGGGAAAACTAAAGCCTTGGCTGGAAGGAGGGGAGGGTCGAGAAGAGTTTTTTTNGATGGTGGGGGTTGTTGGTTGGGTTTTGTTTCCTCATGTTAATATGTGCCTCATTTACAATGTTGCACAATGCTCAGCAGTTCCTTTCCT
Gma.9417.1.S1_at	CA802413		0	No Homology to Known Proteins			ATATGCCTAGAGAATTCCAGCGTGTAATTCATTGGCCGGTAATTATACCTTGTGTTTCGGTGTTATTATAATTTGATCCCGCTAACTATTTAATGCAAATTTTTTAGAAACATGTTAAATTTGCTGACTGTTTTAAGACGCATGGCAAGAATTGCCCGCTTGTTATAATTTTTTGTAAGGGGATGCTTTTATGGCTTCAGTTTTCCAAA
Gma.9459.1.S1_at	CA819044		0	No Homology to Known Proteins			TTTTATGTGGTGCTCTATGAATGATATGTTTTTCCTTCAAGTAATGTTGGGCTTGCTCTGCCTAGCATATGCATAACTGAGTGAGATTGTTATTGACCTTACCTTAGATTTCTTACTTAAGTAGGAAAAGGAAGGGAAGAGAAGGCTCCCTTGTTTCACATGTTAGAAGTTCGACATGTTGTAATTGGAACATCTGGCTTATGACCATGTTGTACCTTCTTGAAAAATATCTGTTTG
Gma.9548.2.A1_at	CD395161		0	No Homology to Known Proteins			TTATTCTGCTGTGTATGGGTAAATAAGTTGTTTATAATATGAGATTATTAAGTGTTTAAAAAAAAAAACAAATACTCGAGACTAGTTCTCTCTCTTCTGATGTAAAAAGGTTTTATTTGGTCTTGCTTTATTTATTATTACTATTACCATATGCCTAATAGGTTGTTTTGGGGTTGGGGTGTAGGTAAAGTCACCTTCTCCATGTCAACAACGTTGTATGTGAACTGGCCTTAAGTTTATAGTTTATGCCATGAGAAATGCCAATTGTCTTAGCTGTCTCCAAAAAA
Gma.9692.1.A1_at	BG362937		0	No Homology to Known Proteins			GGAGGAGGCCCTGAGTGTTATAACTGTGGAAGAATAGGTCACTTGGCAAGGGATTGTTACCATGGACAGGGTGGTGGTGGTGGTGATGATGGTAGGAATCGGAGACGCGGCGGTGGTGGTGGAGGAGGAGGAGGGTGTTTTAACTGTGGGGAGGAAGGGCATTTTGCGAGGGAATGTCCGAATGTTGGAAAAGGAAATGAGTGAGAATGTGTTATGGTTTCTTCTATTGAATTGAGTCTGTTACTGTTAGTTGGGGTTGGTTAAATGGATTCTGTTATTTTTGTTTCTAGCCATTGGCATTTCCTTCCTTCCTTCCAAATATGTTTTTCCAGGGCTTTGCTAATTGTTTTATCTAATGCGCTTCTTTTC
Gma.9700.1.S1_at	BI968093		0	No Homology to Known Proteins			AACCCACTTGGGAGAATGCGAGCTGAACTGAGTTTTGGGAATAGTATTATGACATGGTCATTTTGAAGAGATATTCTGTTGGGAGAATGCTGCCTCTTTCATTGTTTGGGCATCTATTATGCCCTACCCATTATAGTATCATTCTTCCGTAGCAGGTCAAGATTTTTAATTAAAGTAAGGGAGAGGTCAATAATCTTTCAGTATGATAGGGTTGATTTTGTAAGTAACTGGAAAGTGCAATGGAAAAGGCAATTTGAGATGTTATGTGTTGCAAAAGAATGGAAATACAAGCAAAACAAAAAGAAAGTATGGATGGCTTTAGTGGTTCAATTTGAGGTGTCATCACAAGTTAAGAATTGGTTCACCAGACAGAGATTTGTAGATACTATATTGNAGTAC…
Gma.9776.1.S1_at	AW734330		0	No Homology to Known Proteins			GCTTCTATGATTTCATTGCCGTGGATTGTTTCTCAATTGTGAAGAATTTTGATGTTGACAAGATTCTCCGTTCTACACTTGATTGATTGCTTAGACGAGTCACTATTGTGACTTGAAATGAATTGAACAACATACACAAATGTATCTCCACTTGCTCAGTTGACATACTATTGTTACATGTGGAGAGTACAATGTGAAGTCAACTGCCCTGATTGCTTGTAGTTTGCAACCGAAAATCTTTATATATATTTTTTTGTTTGTGTACCGTCTTCCTTNNNNNNNNNNNNNNNNNNNNNNNNNNNNNNNNNNNNNNNNNNNNNNNNNNNNNNNNACCCACTTATTTTCTTACCGTTCATGATGATGTGAAAGCAAGGCAGGTGTTGTGGAGTGATCTCAGGT…
Gma.9797.1.S1_at	CA936781		0	No Homology to Known Proteins			AGAAGCGGCAGTCACACCTATTCTATAGTTGATATCATCAATCTGCACTCTTTTTTTTTTTGTATGCGTGTAAGATATTTTGTATTCCTCTCTTCATTGTTTCATTTCTTTTGGTCGCTAGTTATTTCTGATGTGTGCTTCCTGTAATCTCCTAGGCATATTTTAAAAATGCCATTTCGTCTGTTTGTAACTTAAAAAACTACTAGCAAAACGCTGGTGCACGTGTCATTGTAATTTTTCGCTAAATTG
Gma.983.2.S1_at	BI095024		0	No Homology to Known Proteins			GTTACACTATGGTAGGAGCCTTTGTCAAGGGAGCAGCTCATTGTTGGATCCGTTGAGATGAAGTAATAACATTCATCTTGTGTTTCTTGGAAAAATGATTAAACAANCACATGCTTTCACCATAAATCTAGTTTGTCATTTATCGATAGCGGTGCTTAGTGGCATTGGGCCACTACAAGGAGACCGTTGCATCTCAGTTCAGTGGTGCGTGCGGCCATTGCGGCTGTATCCCAGAGTGGTGGAACGTCAGATTGTTTCAAAATCTTCTAGAAGATCTGTCTGAAGTTGTTTCAAAATCCCAAAAATAACCTTACTGAGTGGTGGTAGTGGGGCCATTTTGGGAATTTTAATATTGTATCAAGTATCAACATCAAAGAACAAAAAACCCCTCGACCCTTC…
Gma.9854.1.A1_at	AI440587		0	No Homology to Known Proteins			AAGCCAGCGGCCCAAAAGGAACAGATGTCTGATAATCAGTCAGTAGCTCATTCTTTAGACGGTTCCGATGATGTACATATGGACCCAAAACTATTGGAATCTGAAGGTGCAGTTGAGGGAAGCAGTGTCAGCTCGGTTCCCACTTCTAGTGAGATACAAGAGGAGCATGAAGTCAAATATGATGAGAAATGAAGGTGAATCATGCATGATCTATCATGAAAAACATGATTTGGAATAAGCTTGTCACACAATCTGTTTCATAATCATATTAGTTGTACTTTGAACTGGACATCAATACAATATGCAAACGCACGTATCTTTCTATGCA
Gma.9925.1.A1_at	BF010330		0	No Homology to Known Proteins			GAAAGTAACAATCGTCGTCTTCATCAAGAACCTTCTGGNCCGTCTGCATATCTATATAAAACATGTCGTCGTCTTCGTCGGCATTACCGGTGAACAATCCCGAAAGGTCCACATCAGCATCCGCCATCACANCAGCACCACCACAACAACAACCAAAAAAAAAACCCTAAAAGCGCTTTCTTAAGCTGTTACACTTCCGCAGAAACAAAAACTCTTGCTCCGAATTCAGAATCACTTCATCGAATCGCATAGCGGAGAAAAAAAGAGAGAGTGTGTGTGGAATCGACGAAAATTGCGGAGTCAGCGATGGTTTCTGAGTTTTCTGAGTTTCTTCGAAGGTTCGACTTTTCGTCCCAATTTAGAGT
GmaAffx.10226.1.S1_s_at	BQ452761		0	No Homology to Known Proteins			GAAGCTCATTATTTTAAGGCATCCAGCGGATGCATCTTTTTGGACATTGAATGTGGCATTCTGCATGGTTGTATTTATTACAGATAACATCAAGTAACGCACTTTACCGTTT
GmaAffx.10340.1.S1_at	CA938421		0	No Homology to Known Proteins			GATTAATTGATAAATTACCCAAGAAAATAACCTAGCTAGCTCCTTGTGGCTATAGTAACAATAATAACAAATGTATGGGTACGAGTACGTGGATGGTTAAAACTATTTATGTATTGTATTTTACTTTTTTATTTTTATGTCTTACATATATGTCGAATGGATTGAAGACTTACATCGATGTAAACGTATTAATATA
GmaAffx.11172.1.A1_at	CD404556		0	No Homology to Known Proteins			GAAACTCTGGTTTCGCCAATGAAGCATTAAGGTTGTTGAATGTTGATGTGCCACGCGAAGCAAGTGTAAGGAAGAATAAGATGTGTAAAATATTTTTAAGTCGTGTGATTTTATCGCTGGTTCATGTATGTTGGGATTAAATGTGTAATATGTATATGCAGAAGGGAGGGGCCAAGCATTGTATAGATGTTAATATTTGATGAAGCTCAGTTATGTGTTGTTACTTGTGTCGGGTTATGTATCCATCACTGATGTAAAAAAACACTGCTTCATCTATTTGTTAGTATATGGAAATNGGTATATGCTTTCTTGTATTATTGTGAGAAGCATATATTTAATGACTCTATCTTAAATTCCCTGGCATTTCTTAAAGTAG
GmaAffx.1184.1.S1_s_at	BI470180		0	No Homology to Known Proteins			GGTCTGCATAGTCTACTTTGAATATGTAAAGTGTGTTTGTTGTGCCATGACAGACTCTCTATTAAAGATTTAAAGTATTAGTGTGCGGAACAGAGTTTATCCGAAA
GmaAffx.11909.1.S1_at	AW423454		0	No Homology to Known Proteins			CATGGTGTACATGACTGTAGACCAGTTGAACTAAATTCAATTTTGCAAAGTTGCAATAAATATATTTTCAATTAATATTCTCAGGCATTGCCTTAAAGACCACGTACCTCAAATTTGGGGGCATGGCTAATACTTCATATTTCTAGATGCTAATTATACTGTAAATGTGTAGTGAGGAAAACTATTCTTCCTATTCGTATA
GmaAffx.11919.1.S1_s_at	AW760869		0	No Homology to Known Proteins			TAGTAACCATTTATTCTGATATTAAAAAAATAAACAAAACAAATAACAACTCATGTGATGTGAGTTCTGGACAGGATTCTCCAGCCAGCCGGCCATCCTCTATCTCTATTCTCTAAAACATTATATTATATCAAAATTCTACCATATCATAGAATTTCTCTATATTAATTTTCAATAACACGGAATATTGATATATTATCCACCCCTCATTTTTTACACGCAGGTCGATTTTTTTTTCCAGTTTTTTTATTTACAAATTACAACGTGCGTGCATATTCCGTATCCCGTATTCCGTCCGTGTGTAAGAGTACACCG
GmaAffx.12007.1.A1_at	BU551279		0	No Homology to Known Proteins			CTGGCTTCTGGCGTGGATGATTTTGGTCCCGAAGATTTCGGTGATGAAGATTTCAATCCTATGGAGGCTGCCTTGTTATCAATGATGATGCATTCTAATATGGAAGATGAAGATGACGACGATGATGAAGAAGAAGAATACAGTGATGAAGACTACTAGATTTACTTAGTTCATATAAAACCCATCTATAGACCAGTTGTTGAGGTAGTTATCTTTGGCAGTATGGTATCCTATCACTTTGCTTTAAAAAGTATTGGGGGCAGGAACTTCAAGATTTATTCTCGTTTATTTTGCTTATACTCATGCCTATACCTGGTATTTGTGATCATATGCCAT
GmaAffx.1301.110.A1_s_at	CD399897		0	No Homology to Known Proteins			GATAGTGTTGCATTGTGTTTAGACCAGTGGACTTTGTTTCTTGTTCAATTGAATCTCTTGACAATGTTGGTGTGGCTTGATGGCCNAACTAAGCTGATTCATAGGTTTGTTGTTCTGTGTTATTGTGTGGGTTTCGATTAATGAAATTTACTGTGCGAATGAGCTAAAGTGGCTCATAAATGTTCTCTNATCTTTATTATTGTGTTCATTTCATGATGCTGACTTTATTGAAATGACNNNGGGGATCATATATAGCATTGGTCTTGTTCCATGTGATGGAATTATTAAGTAAANNANNANNNNNNNNGTTAGTTTTCTTTGTTTCTAGAAATGTACGAGAGTATTTGGTTTT
GmaAffx.1301.45.S1_at	BG157835		0	No Homology to Known Proteins			AGAGGAAGGCATATGTTTGTGTTTGTTGGTTAAGTGGACTCGTTATGTATTATGCCTAATTCTTGATCATTTATAGTTTCGCTTTGTTTACTTTGTTGTTTTTTTTTTTTTNAACATTTTGGTAGCTTTTCTGATGCTTTTTTGNTCTTTAGTTTCCCCCCAACAACTATGCTTCTGAAAACGTGTAGCATCTTTTTGGCGTTTAATAGATCTCCTACAATT
GmaAffx.1301.58.S1_s_at	BI945616		0	No Homology to Known Proteins			GTATTGTATTGATGCGCCCCGCTTTAATTATCAGTTATAAGAATTAAGATAGCATGTCTTTGC
GmaAffx.1301.61.A1_at	BG650277		0	No Homology to Known Proteins			AAAAACTCGAGACCAAAAGATGAAGAGACTTCCAAGTGACATGGGCAATGAATGTAGCTAACTTTATATGCTTCATTTGCTTTTTGAATGATTGCNGGAAAGAGCAGTCCCTTGTACTTGGCTTAGAAATTGTTAGTTCTATGCCTGCATACCTAGAGACATGGTAACTTGGTTGGAAACAGGCTGTTTTTACGCTTTAGAGTGATGACAAACTATGTATCTGGAATTTTCTTAGATACGGCCATTTTTATTCACTTCAGAAATTTCTTTTTT
GmaAffx.13300.1.S1_at	BG155364		0	No Homology to Known Proteins			ACGTCACTGTTGTTTAGGTGTCCCTGTACTTGTTGGTAAAAGCAATGGTATCCTTCGGCAAATCTGTCTTTTGAACCTACTATGATTTTACTGACCTCGAAAACTCAACTCAACAATGATGTTTTGTGCACTTTCATGTTATTAGTCTCTACAAACTGGAAAGAGGCAAATATTGATATTTTGCTTGGTTCTATTATTGTCTAGTTACTACGTAGTAGTAATTCACTTTTAACGTTCCAACTTGTGGTTTTTAAATTTCATATCTGTTGTTCTGTGTTAGCATTATATGGTCTGGTATGTAACCAAAAAGTTGTATAAATTAATGGGAGAATACCTCGTACTCAACATACACTTATAGGCAAGTAGCTTTCCCGAGTA
GmaAffx.13310.1.S1_at	BG156536		0	No Homology to Known Proteins			TCGCTGACATGGTTTGAATACCTCATCTAATTTTTATTTATGGACGTGTGATTATAATCTTCTACAACTGTAACTTACTCTCGTCATGTATCAAGATTAGTAGCTCATGACTAGTATTCGTGTAATTACCCTGACGTGTAGGGATCAGAAGAACGGCGAGTACCGTGTAACAACTATACAAATCATACAATTTGTTTACCATTAAACTTACATTTCTTGGGTCACTGTGCTTAACCCAACAGCATGTAC
GmaAffx.13356.1.S1_at	BG237838		0	No Homology to Known Proteins			GTAGTGTGTGAATTGTGTCATACCTTATCTTCAGCTCCAAAGTTAGTGTTCCCATTAAGTAAGCAATATAGTTAACGGTGTTGTCCATTATATCATTTCATGTACAAATGATTTATCAGGAAAATAAAGAAGAGAAAATCTCTGATGCTTTGAAAA
GmaAffx.1338.1.S1_at	BI967589		0	No Homology to Known Proteins			ATAGTCCTCCCTATAGTTCTAAGAAATTGATTGATCACATATTCTAATTGGTTCAAGGTGGTGGCTGCCAAGAAATTGGACTAGTTCAAACTTCAAAGATTATTAGTCAGGTCAATTCATGCTGCCTAGACCATTGCATTAGAAAAATATATACCTTGGCTTTTGTAATCAGTTTTGTTTTCTTCTTTTTGGTCGCATCATGTGTTGATTAGTTTACATTTTCCACGTACCCATTTGTACATGTTTGAAGATTGAGACATTTTGGTTTGGTTTGGTTTCTAGAAGCCTATGTATGGACACGGTGCTTGCATGTACCGTTTAGAATTATTACTTTACTACCGGGAAGAGAACTCATTGAAGCGGTTTTATTCTAGCTAGCTAGGGAGAGAAACGCTAAGC…
GmaAffx.14100.1.S1_at	BI423789		0	No Homology to Known Proteins			ATATAGGTGCATCATTTCAACAGGAAACATCGATGCTTCCCTGGAGTTGTCTCCTCTCAATTAAAGGCATACTAGGTAGGTGCGAGAATGATTGATCAACATTCAAGTTCCTCAAGTTTTGGTCGTCCCCAATATGTATGTATTGTATTTTCTACTTGTTATTCTTTGTGATTTGCTTTTAATTTATAGTTTCCACCTCATGTTATATAATAGCATTTTGAAGTAGTTTACCCGTGAATATTGCAAAGTTGGAATTAGTTCTCTTTTTATTGTT
GmaAffx.14141.1.A1_at	BI973009		0	No Homology to Known Proteins			TGTTGCCAGTGCCACTTCCCTAAGTGGCAATATGGCATCATTGGACAATATATGCCTTGTAAAAGTTACAATACCAGAGCCACTGTTCATTGAGGCCGGTGTTGGGAACTGCTTCACTATCTTGTATGTTGTATAGTACAAAATATAGGAGGAAAATCCCCCCCACCCCCAAAATAATCATAAAGGAAAAAGTATAGGTTAAAAATTGAAATAAATATAGAATATAGAGGGGGGGTAATTTACGCTGGTGTAACTCATATCATATGTGTTGGTATCAGATGCGCAATGTACAAAGTGGCTT
GmaAffx.147.1.S1_at	AW100906		0	No Homology to Known Proteins			AACCAGGTGTAGAAGTAGATTACTCCATGATAAGATTGTTGGTGGTGTCTAACTGTAATGGCATAGCTCTAGTCTCGTGAATGTGAATGTGGAGGAGTGGACTACTAACATTGTTTTTTATTCGTATGATATA
GmaAffx.14960.1.S1_s_at	BQ630244		0	No Homology to Known Proteins			GACATTCCTTCCATGGCTGGTGGAGTTTTCTGAACCGCTTTTTCTTTGGTCTCCCTGTGTGTAAATAAAGCTACAAGTTGTTTTTCTCTGTTTTTGATTTTTGTTGCATTTGTTGTTCTCTTGTTGGACACATCCCCCCATGTGTCTGAAAA
GmaAffx.14977.2.A1_s_at	BQ298894		0	No Homology to Known Proteins			AAAGGTCACCGAATGTTATGAAATCAAATGCTCCTGACAGTTTTTTGATCCCGGCATCATTGAAAGTTGATCATGATGACTGCAAGTATGTTGGGGATCCTTCCATCTTCAGTTCTTCAGTTGTGCCTTCTTTAACTAACATGGTTATGTGTAGGTGACTCCATGATTCATATCTTAGTTTCCGGGTTCTTTACTTCTCTCACTCCTTTGCTTTTAAGTACATGTATTTAGCCCCTAAA
GmaAffx.16168.1.A1_at	CD408636		0	No Homology to Known Proteins			AACAGCAGATGAAGGATAGAGCCAAGGAGCTCAAGGTCTTGCTCAAGAAAGGGGTGAAGATTGTGGGAGATTCATGCAAGAAGGGGTGGAACAAAGTCAAACACATCAAACGCTAGCTGATTAGTGNNNTTGTAATCATNTGTTGCATGGCTTATTATCCCAAAGTCTCTTGATTGNNNNNTTTTNTTTTTTGGTATTGNNNNNTATTTGTACTTTCATAGGTTTGGTTTGCATGTAAAATGTAGTCCTTC
GmaAffx.16182.1.S1_s_at	AW508093		0	No Homology to Known Proteins			TAAGCCACTATGCTAGTGCCCGGAATGCTACCATTAGTATGCCTTTGCACGCGCTGACACTAATTATGTTAAAGAGAGATGCTTCTAAAGTTCTGGGATTTGGTCTCTTCATAGNTGGTTCAGTCACTTCACAACTTTTTANNGCTGCATGGTATCATTGAAAAGTTGAATGAGAAACAAGGATGAGCTGAAATGATGCAATCCCTTCAGTTGCTGCTACTGCTCAGACTCTGTATCTTGACGAATTTTTTGACTAATAATTTATATAGACAGAGAGATAATGTTGTTGGTTTTCGTTGTGTTAGTGAGGCTGACGTGAATGGNGAANGTGTGANGCGAGAATAGTTTATTTGTAGAACTTTGGAAGAGAACATAATGGACATGTTGCTAGTGGCTACA…
GmaAffx.16198.1.A1_at	BI967872		0	No Homology to Known Proteins			TTCCACTCCTTAAAATACCTTTCATAATTTCATCCTGGGCTACCTACGCCCTCTGACTTGGTATATCTCTGCCAAGTTGCATGCATGCAATAGATCGATATAGTTTGATTTCTTTCGCGTTTGTGAGAGCATTATTGTATGGTGTTATCAT
GmaAffx.16408.1.A1_at	AW311648		0	No Homology to Known Proteins			ACAGCATCGATAACAATGGTCTCTTGAGGCTCTACTTGGGTGGCAGGAGAAACGGGTCCGGGAAAGGAAGGTCGAACCAGGCACATTCTATCGCCAGAAACGTACTTCGATTGTATTGAAAAATTGAAGGTGNNNNNNGGTTTCATGATGTTNATTAGTTAGTTAACCTATGTATTCTTGATGGTTGGTTTACTTGGTTAATTGGTTGGAGTTGGTTAAAAGAACCTGCATATCTTTTTTCTTTTTACAGTCAATAGCATGGTTCTTTCT
GmaAffx.16696.1.S1_s_at	AW706525		0	No Homology to Known Proteins			AAGTATCACCATGCCTGTGTATCTCTATCATATCTTCCATTTCTAGTGTGCCTTTGAATAAATTCTGTGCGAGCTTGAAGAGTGTTTAATTATGCCTATGGTGTTACTTCATATATATATTTGCGTATATATAATGTATGCTATGTTGGCTATATTGA
GmaAffx.16900.1.S1_at	BE022916		0	No Homology to Known Proteins			ACTGTTATTGGTTAATCTCGAATTTCTTGATTATTTGTTGTTACTTTCAATGTAGAGAAATATAACCTTTTCATGGAATGTAGAAACAAGTGCTGTTGTATACTCCCCATGATTAATAGACATGTAAACGATTATTTCATCAA
GmaAffx.1736.1.S1_at	BQ629408		0	No Homology to Known Proteins			GAGAGAGTGTCTTGTTCTCGCGCATAGTGGCGTGGGTTTTTTTTTTTTATTTGTCCATTCTATTACTATCATCCCTTCTGTTGCGAACTGCCTAACATTTGTCAGTGATTGATATGTATTCTCGAGTCTATACCCAAAAAA
GmaAffx.17465.1.S1_at	AW459741		0	No Homology to Known Proteins			GAATGACGGCGTGTATATTTGTATAACATATAGTTGTTTTTAATATGTTGGAAAGAGTGCAATACGTATGAATTTATTGGTAACTGACACGAACTATGTTGTAACTGGGGACATACCAAATAGTGTAATGGACCCTTCAAGTTGAAGAATGTACTCTGGCCAATTTCGATCAAACAAGCATGAAAAGGCCTTATAGTTCCACATG
GmaAffx.18182.1.S1_s_at	BG652355		0	No Homology to Known Proteins			AATTGTGTGAGGATTCGATTTCGTGTGAAATGTGAACTGAGTTGCAAATGGAGATTGACGCATTGAGCACAGGCAAAAGTTTTTGCCTTTTAACTAAATGGTTTGGAACGTGTGCCACAATGTGAAAAAGTTGAACCTAAGAACACTCAAAACTTTTATTTATTAGCAAAAAAAGGACTCTTTTTGCAATAATACAAAATATTAAAATGGTATTCCTGTTTTAGTAAACGGGAGTTAAATGCTTTGGGTGTTGGGGTGTTGCAACTTTGCAAGATGAGTCAATATCTATTTGCCGTATTTTGGAGTGGATTGGA
GmaAffx.18610.1.S1_at	BI787904		0	No Homology to Known Proteins			ATTCAGGCAATGGTGCGTCGTCTACTGGTGGAAGCTTATCTGATGGCGACTTGGAAGTGTCAACTGCTGATTCTGAATCATATACAGGGAATGTTTTTTCTCCTTTGGATGTGAATGTCAATGTTAGTGTTCGATAACAAAGTTCTGGGATTATCCAGATTATAGAGATGTAACTTAGTAAGCACCCCTTCTCTCCCCTTTTTTTTCTCTCCAAGGAGAGGATGGGGAAAAACAAGTAACATTTGATGTGGATGTAAATTAGTTGCCTTCAGGATGTTGGAACTTGGAAGAGTGGTTTACTGAGCTTCTTAATTCAAA
GmaAffx.18769.1.S1_at	BI972364		0	No Homology to Known Proteins			TGATGTTTTTGGTCTTGGTCTCGTACTCCTCCATCAAGGTTGAGGGAATGAGACCGCTGAAAGCTGATCCATCCTTCATAAGTTTGATAATCAACCGGGCTTATTCTGGGCCAAGCCACAGAGGACGCGGTCATTGAACTTACAAACTTGCCCTCTTTTTTGTCCATAGAGATCAGGATTTATACTCTTGTCAAATCACATTTGACACATGCAGATCCAACACACTATGTAATTTATTTTTTGTATACCTTTCTGACAATACCGTTTCTCCTTGCATT
GmaAffx.19097.1.S1_at	BM522846		0	No Homology to Known Proteins			GCGTGGCCATGGGAATCTCATGTATCCCTATTCTTCATTCATGTGACAGAAAGCTCTACTTTTAATGGCATTGTAG
GmaAffx.19541.1.S1_s_at	BQ612990		0	No Homology to Known Proteins			GGAATAATTAAGACCACTCCAATTGTATTTGGACCTTTCTGATGGTGCTTGATGCTACTACTTGTAATATCTTCTTTAACTTAT
GmaAffx.20425.1.A1_at	CD412894		0	No Homology to Known Proteins			GAAGAGATTGCTGCTTAAGGCGCCTCTCTTATTTGTCAAAAATTGTTTCAAANATCGATATGGTTGGCTTTGAACGAGTGGTGTAAGTTTAAATTGTGGTGCAGTCAAATTAGATTGACTCGTTAATGTGTATGCTTATCGTTGATTGTTGACATTGTATAAACTGGGTTTTGTTGACAATGCTTATGTTCTTGAGAGATCAAGTCATGGATGTTTGTAATAGTTAATGACTGGTCTCGTTTTCTTCCCCCCTTTTGATATCTTGATTATAGT
GmaAffx.20697.1.S1_at	BI967357		0	No Homology to Known Proteins			GTTTGTATTCTTGGATCTAAAGCTTGTATTTAATCATCAATTTCAATATATTAACCCTAAAATGTGAAATTAGTCATTGGGTTATATCAGTTTTTCTTTTTGTTTTGACCTTTTCCTTGATCAGCAGTTGAGATCAGCTCATATCCTTTGTGTGACAGTACACTCAAAATTCACGTGT
GmaAffx.20840.1.S1_at	AW156235		0	No Homology to Known Proteins			ATATGGTGTTGCTTTATTGGTTTAATGTATTTAACATAAAATTTTAAACAAGGATTAACGGTTGTAAGTAGGATGGTCAGATTTTCATTTTACTCGTTGCAGTGGCTTGTAGTCAGTTCTTAGTTCTTAGCGCTTTTATTGGTAGTGTCCTTTCTTTTCTAAAATTATGGTANGGTTAATTAACTTTTTAATTCCTCATCATA
GmaAffx.22150.1.A1_at	BE823303		0	No Homology to Known Proteins			GGGAAGTGGATATCTGTTCCATTAGTTATTGTTGGATTCTGGTTGATTGTAATTATTACTTCTGCTTTAACATGCCTTTTACTTTTGTTGAAACCTTATTATGTCTGTTGAAAATTTGTAATTGAGATGTTATAGTAGCTGTCGTTGGATGGTTGGTTGCGATGTCTCGTCGGTGGTGTGTTTTATTATTGCCAAAAAAGATTATTGTGAACGTGATCGCCACCTTCGTGAGGATGGGCGATTTATGCCCCAAACCAA
GmaAffx.23152.1.S1_at	BI701453		0	No Homology to Known Proteins			TTTTTCTGAGTTTCTTTTCTTGTCTTATTTCCAGAAACGTGGAATGTCAGCGTTTTATACTTCACTTTTACTTCGCTTATTTTTTTATTTATGTTTTGTGCTGGTCTTTGCTAGGTAAGTTCACTTATTGTCCAAGGTATGCAGTGTAGCGTTCACTTGTTATTTTTCATGTAATCTGTATTTGA
GmaAffx.23256.1.S1_at	AW102490		0	No Homology to Known Proteins			AATCACACTGTCCAATTATTCTCCGGAACTGTAGAGTCCTTTAACAACTACGAAAATGGGTCACAAGATTTCAGCCATGCAACGATCAAGAGCTCTAGAATTGGGAATTCCTTCAACAACCTCGGATCGGGATTGCAAACTTTCAGGGGCGCTGAGATTCGCTGTGTTGACAAATCTAGAAGCAAACGGGTTGCGTTTAGTTTACCACCTTGCTGGAAACCAGACCGTGTGGCCCACTCTGGAACCGTTAACTCCTTCAACAACAACGGAAGCGGATCTCAGACTTTCGACGGTTTCAAGTTTAACTGATGTACGAGGTACTCCTGTTGTGTGTGTGTTCATATGTGTCTCTGCTTTCAATTTTACTTTTTTCCTCTTTTTTTGCTGGTGCCAGTATTT…
GmaAffx.23292.1.A1_at	BI967795		0	No Homology to Known Proteins			CTACCCATTATCCAAAAACGCCAAGGCCGGTGGGCCTGGGCCCACCCCCACCAAGGTTCCGGGTACTTTGATTTGGCATAAATAACATATACATATATCACTGAGAGCTTCATCGGGCCTAGGCGGAAAAAGCTTGTTGTTACAGTGCTTCGGGTTAATTATATATCTTGTACTCTAGTCTTTTTTTTTCTCTTCCGATTTGTTAGAGTAAACTGTAACAGTAGCTGTTCTCGTAACGTCTGGTATATTGTTAATCTGGAAGTGTCTGAACGTGTTCAT
GmaAffx.236.1.S1_at	AW306854		0	No Homology to Known Proteins			TTATTACCAGCAGTTGAAGCAATCTGCTTTTCTTTTTCCCATTCTTTCTATAATAATCTTCGGGAGGTTTTGATGGAGATTTAGGTGGGCCTGGATACAGTTGGTCGTTTTAGATCCCGGGTAGAATATTTACATTATTATTTATATATGAAATGTAAGGACATCCTGCCATTCAGGATATGTTGCAGTTGTATGCCTTGAATGGGCTTTTACATAAATTTTGCTGAGCAAGTGTTAGATTCTTGTGCGGGATGGCAATATTGTGAATTTTAGATATTGCATTCATATA
GmaAffx.23747.1.S1_at	BM525349		0	No Homology to Known Proteins			AATAGTCCTTTCATCTTCAAGCCTTGCCACTTCCCTGCTTCAAATCAGAGCCATAAAAGTAAAGCCCTAGATCTTCAACTAGGCCTCAACTTGCAGTCAAATACAAGAAGTTCCTTAAGAAGGATGTAATTTAAGTATATATAGGACACATAAGTTAAATTAACAGTTTCCTTGAATTATTTTAATGCATCAATTCTCAAACATCTGGAAAAAGGAAATGAGAAAAGGTAAAAAAAAAATAATTACAATTCATTAGAGTTAGTTGGCCTTGGCCACTGCATAGCCAAGAAGAGTCTGACAATGACCACCTTTCAGAATTCAGACAGC
GmaAffx.24129.1.S1_s_at	BQ610397		0	No Homology to Known Proteins			GAATGATTCCGGGTTAGGTCTTTGTCTATGTTTTAGTGTTCGTCCAAGTACTATTATTGATGTAATTCAATTCTATTTGTATCTCA
GmaAffx.24464.1.A1_at	BU550821		0	No Homology to Known Proteins			GTTTCTTACACGCAGGCAAGGGATAGGAATTAAAACAAGTTTTGGTTAATGTTTTATTTTATTATTCTAAGTTTGGAATTTTAATAATTTTGAGTGCAATTTGTTTTTGCTATGGAGCACATCTTTCTTCTCAACTTATGTCTGGAATAGAGAATTTGGGGCAGCTAGAAAACTTTGTACCTAAATGGCTAAACGATGTTT
GmaAffx.24570.1.A1_at	BU764146		0	No Homology to Known Proteins			CCTCCTTTTGTATTTCGGTCGTCAGCAATAAATATACAAAGGTTGTTTCTTTGTTGCAGATTTTCAAGAACTTTGTCGAACTTGAAANAATTTGCTNAACCTTCGAGCCTGTATTTTTTATGTTAATGTTGCTTT
GmaAffx.24794.1.S1_s_at	CA819492		0	No Homology to Known Proteins			AAACTTAATCTTGAGTGACTAGACACCTTTTGCGGAATGTAGCCAACGAGAATAAAGCAGGACTTAATGTATTGACAAGGCTAACCTTGTATTTGGAACAGGACTT
GmaAffx.24872.1.S1_at	CA935146		0	No Homology to Known Proteins			CTTCTTGATGATTTACCGATTGGCTAGAACCAAACTCATCCAACTTTGGTTCAGTATATGGATGGCTGCTTGGTTGTATAAGTCTGATTCAATTAT
GmaAffx.25368.1.S1_at	BE657690		0	No Homology to Known Proteins			CGGTGGAGAGCCTGACGACGACGATAACGATGACGACGACGAAGATGAAGACGAGGAGGATGAGGAGGAGCAAGGGGAAGAGGCGGATTTGGGAACAGAGTACCTTATCCGCCCTCTAGTCACTGCTGAGGAGGAGGAAGCATCTAGTGATTTCGAACCAGAGGAGAATGGCGAGGAGGAGGAAGAAGATGTCGATGATGAGGATGGTGAGAAGTCTGAGGCTCCACCAAAAAGAAAGAGGTCAGATAAAGATGATTCAGATGACGATGATGGCGGTGAAGATGATGATGAGAGACCCTCTAAGAGGTAGAACTGGGTCCATTCTTTGCTTAAGGGCTCAGACTAGTCAACTTATCTCCCTTTGCCCTTTAAAAACATTTCAGGGACTTGTTTCATTCT…
GmaAffx.25369.1.S1_s_at	AW100848		0	No Homology to Known Proteins			CTCTTATTAGTCTTAGCAGTATCAGTATCCCAGGGAAATCCATCATTTTCTTTTTCTTAGTTTCATTGTTTTTGTAACTTCTAGTACTCAGGATGTCCATCATCATTTTCGTGAGTATGTACTACGAATCTACGATCGTGTTGACA
GmaAffx.25674.1.S1_at	AW395881		0	No Homology to Known Proteins			TGAAGTCCTTTCAAGTACTCAGTTCATTGTAGAGGATAGATCATTCCATGGATCATGTCTTTTCTTTTAGTTTTTGGCTTTGATATTCTCGTTCTTTGATTTATATGTTATGTACATATACTATTTACTGACATTA
GmaAffx.26583.1.S1_at	BE801555		0	No Homology to Known Proteins			ATAAATTTCCACGAGGTGGTCACGTTGACATGAAGCTAGCTCGTTCTTTTTCCATGCAACATTTTACAATGTATATTCAATCCAAAAATAATTTCAGAACTGATTGTTTCGAAGCAAGTAGTGTTGTTTATAGTTGTAATATCCGGTGTCTATAAATTGTGATTCCTATCCAGCCAAAAA
GmaAffx.27061.1.A1_at	CD396141		0	No Homology to Known Proteins			AGGTGTTTGAGATTGTGGCTGACTTGTTGCTTGTGGCGGTCAAAGTGGTGGATGGTGGGCTGGAGTTTGAGGAGCTTCATTGGGATGATTGGAGAATTGGCCTTCCAGATCTTGTTCTCTCATGGCATGATGTTGGATTGGAGCTTTAGAGAATACAGTCTAAGGTTTTGTACAGATGGTCCTAGTAGTCCTTTATGTTTATGTGTTTGGTTCCTTT
GmaAffx.27321.1.S1_s_at	BG551437		0	No Homology to Known Proteins			CTCAATCATACTTGGTAGTCCAGTAAATTCCAATATCAGGCTTGTATTTGAAATGGGAGATACTTGTCTTTAGTATATTATTACTATTATTTCATTTGTTTTCGTACACAAACCCTGTATCCAAACT
GmaAffx.27322.1.S1_at	BG551531		0	No Homology to Known Proteins			GATGTCTGATTATTGTTTTACAACACCATTTGTCGACCTTGTTATTTTATTTTATTTTTGTTTAGGAACTTTGAGTTTTGTTGATAAGATNTGTTTGTGTTTTGTTGTTTAAATTGTTAGTTTGGTACTTGGGGACTGGTTAGTGGGTACTTACTCTCTCTGTCGCCCAGAATTGTTGTTAAGAGATGCACACGTTGTGGATGATTCTGTCATGTTTGTGTTTC
GmaAffx.27492.1.S1_s_at	AW350702		0	No Homology to Known Proteins			GAATACTTCATGTAAGGACTATATTTATGGGNAGCACACGACCTAGTATAGTGCAGTTCGGTACTTGTGTTCTTGACCCGGTTCCTTGCTTCCACAAAATTATAACCGATAAAATCCCCTTGATAATGAAAGTATGTTGGAATGTTTGTCCATTTCATACCAACATTATCTGTGTTGTAGCTTGTTTTAATGGTTGTCTGTTACTAAGTTTGGAGAGATATAAGTCAAAAGTGCAAAGTATACACATATCCATATTTTGACCAAATGATCTTATTGTAGTTTGCTGTAAGATGTTTCGGTCTA
GmaAffx.27610.1.S1_s_at	BI426859		0	No Homology to Known Proteins			AGTTCCATAATCAAGCTTCCTCCCATTTTGAATCTGTCTGTAATGCCATTCAGTCATACATGAAATTGTATGGACTTGCCTATTTTAAAA
GmaAffx.28214.1.A1_at	CD414400		0	No Homology to Known Proteins			CAGGTACTGCTTAGATGTTGCTAATGTTTTAGATTTATTCCTTTTTTTTTTGGGTTAGTCGATACCCGTTTGTGGTGAAACTCGTGAACTCTAAAAGAGTGTTTACGTCAGCTTCTATCAGTGAAATAGTTTTCTTGTTTACATTT
GmaAffx.28382.1.S1_at	BM528798		0	No Homology to Known Proteins			TAACTAGTTAGTGGCTTAGGCATTCTGTATTGTGCCATGTTGGTGCATCGTAGGTATTCACTAGTTTGGTCTTGTCAACTTCTTAATGTGGATAGAATTATTTAATATTTGATGGGTTCTGATTCTGAACGTCTCTAACATTTGTCCTGCATTGGGATATTTATGT
GmaAffx.28517.1.S1_at	BM954423		0	No Homology to Known Proteins			AATCACATTATTGCAAGCTCCTTATAGTAAACAATGTTTTTGAGAAATTCTTCTCAGACTAAATTATAAAC
GmaAffx.28683.1.S1_at	BQ742756		0	No Homology to Known Proteins			GAGTGACTATTGGTTGATTATGGTAATGTTTTGTTTTGTTTTGTTCACTGTTCTGTCTTTGATGGATTCTGTTGTAACTTGTAATCACCTCTTCCTTTTACTTAAGCTGTGATTTATATTGGT
GmaAffx.29357.1.S1_at	CA803053		0	No Homology to Known Proteins			TGTCTTTGCCATTATATGGCTGCACCGTTGTCTCTTGTAACTAGGGTGTGGCTTGCCGATCGATAAAAAAAACTGGTGTGTGGCTTCAATAAATGGCCTTTGTACATACATTTCTAGTTGCAACTTGCAAGTGTTTCATACTAA
GmaAffx.30010.1.S1_s_at	AW164239		0	No Homology to Known Proteins			AAGTCTTCCAATTAATGTTTGTTGTATTTTACTTTTATCACATGCATTGATGTGAATGATCTCAGCCGCCCATTTCATTTGTTCAAACTTCAACCCGTAATTATTCTTTCAGTTTTAGTTTAGTATTCTTCATGTTTCA
GmaAffx.30151.1.S1_s_at	AW317339		0	No Homology to Known Proteins			GTTGACGTATTATACCTTCCTTCCAGTGTGTTTAGACTATTACTGTGATGTGAAGTCTTGAGCTTTATGAACTGTTGGTCTAAGCTTAATGTGAGGTCTTTGGCTTTGNANNNNTAATAATATCCGTTATNTTTGAGTGTGTTAAATTATTTCCTTAGTTTGAATGAGTTTATGTGCCCTGCATCATGTAATTTTACCTTCTAATTATTACTGGCTAAG
GmaAffx.302.1.S1_at	BE659120		0	No Homology to Known Proteins			TAGTTGTATAGGGTCTTTAATACCTANCTGTTGGCTCTTCGAATTTTTACAGAAGATGACTTGTTAGATTTATCAATTGGAAAATGAGTTACACATATTATGTGTGAATATGTGTGGAATCTAGATCATGTAGAACAAGTTGCAGTGGTCTTGTTTAATGACATGGAGAGCAGTATTTTGAGGAGCATGCGAGTAAAGTATGTGCAACTATCATTACTTTTATTGAATTATTATGTATAGAGTTGCCGGGTTCGGATTTTTGAAGCACGTTGTTTTCAAATTTCGACCGTGTTGCAAATTGGATAGTGTGTGTACTTGACTAATGAGGAGATTCTTAGGGCATACAACTACAAAGGTGAATATTTTGCAACTTGCATGAGGGTGAAAGATTGCTTAAGT…
GmaAffx.30662.1.S1_at	BE023739		0	No Homology to Known Proteins			AATGTTCAACGAATAGTGATAATGATGATTATTGTGATTTTTGAAATGTGATCTAGAACTTGCACTTGGCAACGTTAGTTTGTCATGTTTTTATCTCATGTTCGTTTGTATGGTTGAAACAAAATAAATTTGTCAAACAATATGATGCTTCTTTTTATGCCGATTCTTGTTCAGTAAGATTTTTAAAGAAAATGATCTTAAGACCCCAGACTTTTATCAA
GmaAffx.30674.1.S1_at	BE057315		0	No Homology to Known Proteins			GATTGCCAGAAATTAGGGTACTACTATAGTGCTATCACATTTCAACAGATTTTTATTTGGAAAATATTTTAATTGCACCAATGCCGTTTGCTTATTGGTTCTGATAA
GmaAffx.31029.1.A1_at	BE659140		0	No Homology to Known Proteins			AAGCTACCCAGAAATTGCCCTTTTGATGCCAAATATACACCGTCATGAATCTTATTTAAACATCTTATAAGCTTCTATAGGATGCCAATTAGCA
GmaAffx.32692.1.S1_at	BM522511		0	No Homology to Known Proteins			TTTTTGTCTGGTCAATTACTGATAATCTTTCAGTAAATTATATATTTGGGGATATAGGGTAACGACGATCATTTTGATAACGAACCCTTGCATCTGTAACAAATTTAATTGATGCTGAATTGAGGCAAATTCAATGCAT
GmaAffx.33129.1.S1_at	BQ611705		0	No Homology to Known Proteins			GCCTTGAAGAGTTGTATTTGTGTGCTTGTATTTTTCTCTCCCTCTCTTGCTTTTTCTTTTCTCTTTGGTTTATGTACTCTTTCTGTCTGAACAATCAAGACTTTTAATTCATTTAAGTTAAAGGAGAATTAGCATTGTGGTGTGATATGAATGTTTGGAATTTGGAATTGTATGAATCAAGAATATGTATGTCATTTACAAGAGC
GmaAffx.33417.1.A1_at	AW348567		0	No Homology to Known Proteins			AGGGCGTGGACTTGGTCGTGGCCGAGGTTCTTATAACAATAGAGGAGACAACTCCAATAATGAAAGGCAGGACTCTGGTTATGGGGGCAGATGGGGTTCTAATAATACAAAGGATTCGGATGATGGTTTAAGCAATTTTCCAGGGGCCAAGGTTCANAATTCTCCTGGAAGGGAAGGGAACGGATGGGGATCTGGAAATTCTGGCGGCCGTGGTTGGTGAACTCACCTCACCTGTGAGAACTTAGTTTAGCTTTACCCACAGGCGGTAGGTTGGTCATTATGTAATCCTCTTTTTCCCACTGAAATGAATGGATGATGATATTTGGGTAGTTTATTTTTGCAATGTAAT
GmaAffx.33527.1.S1_at	BU761195		0	No Homology to Known Proteins			AGAAACTGTAGAAGCCTGTCGAACAGTGAATTGTAATAGTGGTAAAATGAAAGAATGAATGGGTATATATATGTGTGGGAGTATACAGATATAGATATAGATATGGTGGTGCAGCTGTGGTGATTTGGCATTTTCTGGTTTTTGTTCGGTGCTTGTTGGTATTGGTTGGTTTGTTGGTTCCATTTGATGTTTACATAGAGGAGCTAGCTTAGCCACTTTCGGCAAAAGAACTCACAGAGATACATTTACACAAAGAAAGAACGCGTTTACTGTTTAGAGACCAAACCCCATCTTTTGTACCACTCAATGAATCATTAGTCTCATACTCAAACTCTGAAAG
GmaAffx.34020.1.A1_at	CD405933		0	No Homology to Known Proteins			CACTAGGGTTTTGGTCCTACTCTTGTTTGTCTTTCTCTTTCTTGTTTAGTTGTTTAGTTTTCTTTTTCCTCCTTCAAACTCTCCAAGGGTGTACTGTTTTTAGTTTTTATTTTGCTTTGCATGTACACTTGTATTTGGCCATATCATAGGATTCTTAGGATTTGGTTAAATTGTGATATGCGCCCAACGTAATGACTGATTGATCAAATGGCTTTGTGTATTACTCCTT
GmaAffx.34085.1.A1_at	CD418272		0	No Homology to Known Proteins			TCCAATTGCCAAGCATAGCAAGTGTATGAACAAGTTTTGTTTCCTCCCATGTCATGGTCCTGAAGAAATGGCCTCAAATGGG
GmaAffx.34612.1.S1_at	AW311496		0	No Homology to Known Proteins			GCGGGCCGGTCGTCAGTTCAGACTAGCTGGTCAGTGGGGGTAAGAGAGTGTTCCGTTAGTGTTCTCACAGTCTCAGTGCGACCTTGCTTGGTCAACAATT
GmaAffx.34759.1.S1_at	AW318036		0	No Homology to Known Proteins			CTTTTTATATTTACTCGTCTGATGTTTTCGATTTGATTATTTTTGTTTTGACGGAGGAACAGGATGTGAGTTGTGGTTTTCTCTGTGATGATGAAAACGATGACNAGTCTGATATGATATCCATTCCTTACAATACTGACGACAAATCGANGCATTTGTCTGAGAGGATTCCACTCTTTCTCCCGTCCTTTATATTTGGGTTGTTTAATTTTTTGCGCATGGTTTGTTGTTTCGATTGTTTGTATTTTTTGTGTTTTTTTGAAATTAGGCATGGTGATG
GmaAffx.34785.7.S1_s_at	BI497973		0	No Homology to Known Proteins			ACCACCAGTTCACCCTCCCTACATTCCACACCCAGTTTACCACTCTCCTCCACCACCACCTTACAAGAAGCCTTACATCTATGCATCACCTCCCCCTCCTTACCACTATTAGCATACCTCTTATCGATATGAA
GmaAffx.35147.1.S1_at	BE057270		0	No Homology to Known Proteins			AAGTATAGGAACTGTGGCTTTCATAGGAGTTTCTCGTATTTGGTTTCGCTACCCCCCTTTTTTCTTCGCACTCAATATTCCCATCAATCATGACTCTTCATCAACTTTATTATCTGGGAAAGATTGCAAGTTTCATCCCCTTGTGTGCTTACTGTATCAATTAATGCTACTTATAATAAAAGTGCATTTCACATCAAA
GmaAffx.35331.1.S1_at	BI967623		0	No Homology to Known Proteins			GTTTCTGCATCAGAGTGCGCAAAAGCAAGAGCAAGGAAAGCAAAGTGAAAGATTTAGAGAAACTCTCCCATGTCAAGCCTAATCACAAGGGAAAAACCAAAGGGTGTACTTCAACAACTCCTGTTGGTGATGGTGGTGGCATCAATGTTCATGGAGCCAACACAGTTGCTAACAATGATGTAGGAGTAGCTGCTGCTGAGATGACTGCAGCTCATACCTCTTTGATGAGTGCCAATGGAGTTCAAGATGGAAGTGGTCATGGTCAT
GmaAffx.35625.1.S1_at	BM143354		0	No Homology to Known Proteins			GTGCACTTCCTTTTATCCTTGAAGTTCCCTTTTTGTGCTTTTGGTGCTCTATGGGTGTATTTCTGTTGCAGTTTAATTTGGATAACTATCAACTTTGGCGGTATCGAGCTATTTCAATTTCAGTCTTTAGTTGAAATAAGCATGAATGTTTGAAGTGAAGCGGACTCCAGTTTCTTNNNNNNNNNNNNNNNNNNNNNNNNNNGTAATGTCAGTCAAATAATATGCGGTAG
GmaAffx.36061.1.A1_at	BM142770		0	No Homology to Known Proteins			AAGCTAGCAATGCTGCAACAGTGCTGAAATTGCCAGTGATATCAAGTTACTTTTGTTCTTTTTGATGGGCTTCGAAAGTCACAACAAGGGAAAGACAAAAGCGGTGGATGGGTCAAATTTTTACCCTTTTTTATTTGGTGCTTTAGGGTAAAAATAAACAAAGCAATTTGGAAGGGGCTGGACCATATTTGCAGAGGGATTACGGCTCCTTCCAANTGTTNAATCACAGNGGAATCATTTNGGGGGAATACTTGTCAGAAGTAACATCTGATTCCAACCTGTCCACCCGCATTACTTTACTACAATAAATAATAATGCAAGGAATTTTCACTATCTCGTTTTACATTTGTGAAA
GmaAffx.36294.1.S1_s_at	BG652547		0	No Homology to Known Proteins			AAAATGACACTGCTGAATAAACCAGGAAGCTCTAAGTACATTCCCATTGAGGTGGTCTAGCAAAGGAACTAAATCAAGCAATAACGTATTGAGATCTCCCATCGATGGAACAGCTGATCCTAGAGACCTGACACTTATGAAGTGAATCCTGGATTTGTTCATTGTCTTTGAACATTTTTTTACTTTTCAGCATTCTGGTGCACAGTATTCATTCTTCGG
GmaAffx.36820.1.A1_at	BI967487		0	No Homology to Known Proteins			GAGTTTCACCACTCAAAAACCTCAACTCTCTCTGATTTTCCATATTATCTGCTGAGCATTCTCTGAAGTCTGACCTATGGTTATAGATTTTGTTTTTTCTTGTTTTCTTTTTCTTTTCTTTTCTTTTTTTAATTTGAGTTGTCACTTTTTGTTTAATCCTTATATAATTTGTTTAAGGTTTTTAGTTTAGCATAAGTAAGTTGTTGATGAAGGGATTGCTAGGGATATGTTTGCTTGATATTTTACATAAGGGTATGTTGACATCATACTGCTGATGAGTGTAAAGTCA
GmaAffx.36823.1.S1_at	BI967614		0	No Homology to Known Proteins			AAAGCTTCTCGTTTGGAGGACTGATAAGCCTCAAGATGATATGCCTCAGACACCAAACTCACAAGTTACAATTGTATCACGAGACCATCCACGTGGGGGCAATTATTAGTTGTAAGTTGTAACATGCTGATGCAGCATATCAGTTACTGTATGTCTCTTCAGATGTGATGAGATATATGGTTACTTAATGTTTAGTTTCTCTGTGTCCCGGTTAAGTTTTCGTTTCTATAGAAGATAGAAGCTTTAGTTGGTTAATTATTGAAGTGAAGTTGTATCCTCATGATGCTTTCTCTTTCACTTAGGGTGTATATATGAAAGNTTGTAANTTAAACTNCTTGTAACAGTATGTAATGGTCAATTAATACGTAGTTTTAATTAGTTGAGGCATTGCAAGTTGCAA
GmaAffx.36836.1.S1_at	BI969127		0	No Homology to Known Proteins			GTAGTTGGCAGTTAATGTTTAGTTATGGACATGGTGGAGAACAAAAGCCTAGGTAGCCTCCTCTAAAAGCATCGTAATTATGTTAAGAGATAATGCTTCATTGTTGTGTTGCCTGTTATTGTTATATGTTTGTTTCACAGAATTAGGTCATTTTTTTTCCTGTTATGTTACCCTCTTGTTACTCCCCTACCAAAGTCACTTGGTTTGGTGGAAAGATGTTTGTACACCGTTTTATTTTAGCATATATCAACAGGCAGAAGTTTAGACTAATTTATTTCATGATTATTGTTTATGCATGTAAGCTATTAGAGCATCTTCAATAGATGTTATTAGAAACCTGATCTTTCATGCAAGATCTGATCTTGTTAAGATTTGTTGTTGGAGC
GmaAffx.37923.1.A1_s_at	BU547349		0	No Homology to Known Proteins			CTTATTTCCTTCATCGTACATAAATAAGCTATATTTTGCTGTTGGCTTGTTTGGTGGGAAAAAAAAAAAAAGACATGGGATTGTATGGTGAAAGCTATTTGGTAACTCTTTAGAGTACATGCAGTCAAGATTGGCATTTTTATTTGTGATGTGGGACAAGTTTTTTGGTAGATGAGGTCGTGTCTAGCCTTTCCAGTCATTAATTCTAGTGAGGGATCTCTGAAGTGGTGTTCTTTT
GmaAffx.3851.1.A1_at	BE820548		0	No Homology to Known Proteins			AATCTTTCAAACTTGCATAGTGCTCCTCTTTGTATTCAAGGATTGAAAATAATGACCNNGNNTNNNAAATGAGTTCTCTCCTAAATGCCATGTTACTGTTTGCCGCTAAATTTTGTAATTGTAATATGTTCTTGGCAGATGTAATTATTCTTTTATCGGTTTATAGGCTGATGAAGGTTTTTATTATGATATTTGTTAAGCTAGAGGTTTGTAATGTTGCTTTCATTTTCTAACTTTTGGCATCCTTATTAAACAAAATTATGTAATTTGGCTTGTGATTGGATGTTACATGATGTCTCTCA
GmaAffx.38841.1.S1_at	AI965908		0	No Homology to Known Proteins			AAAAGAGGAATTGCGCTGATTACATATGCCAGGTCATGTGGTGTCGATTTTGGGAATTTTGCTTCTGCTAGCTTACAAGTGTGCAGTTACTGTGTATTAA
GmaAffx.38936.1.S1_at	AW101501		0	No Homology to Known Proteins			TCGAAATAATTGTAGGACTGATCCAATTTTGGAAGAGGTTAGAATCAAGATCGACACTTCTCTCATGGTTCTTAATTTTTTGTTGTGTTTTTTTGGCACTGCCTGCTTATTCTTAACAATCTAGTGTGGCAACGACTACAAGCTCCAAGGATTTGGAAACTGCTTT
GmaAffx.39034.1.S1_at	BE820439		0	No Homology to Known Proteins			GCTCTTCACTGGCATCTGCTGGCAGTGCTTCACGTGGTAGTACTGAGGGGATAGTTTTGTCAAACCAAGCAAGTTGATTTGTGCTCCATTTGTAGTTAAGTAGGTTATATTTTGAGGGTGTTCACTAACAAAGGGAATCTAGCTATGCAATCTGGAAGCCCTTGGTCTTTGTACTTAGGATGGATGAGATTGTGTATTTTGAAAATTGGTGGTTGTTAGAATAGGGTGATCTTTCCTTCAGGGTATTTGATCGAGGAATTCTTGTAAGTATCCCAAAAACTTAAATTGGGAATGCTAGATTTCCTTATTTGGTATTAATTTTTTGAAAGACAATTTTAGGAAACTATCATTTCTAATGATTCTCTTTCCTCTCAACAA
GmaAffx.39099.1.S1_at	AW278540		0	No Homology to Known Proteins			TTTAGTTCTATTCGCCAAGACGCCAACCAATACTTGACCCCTTAGATGGAAATACAACTTATTGGATCTGTCTCTCTCTCTCTCTCCCCTCTTTTATATTGGAGATCTCTTGAACATGAGAAATTTTTGGGTAAACCTGAACCATAGTGGGGTTTTCAGTGAATAC
GmaAffx.39212.5.S1_at	AW423418		0	No Homology to Known Proteins			GTTTCTTATGTTGGTAATTTGTACATTGCTTCTTTATTGCTGTGGAAAATTTCGGATCTGTCATTTGACTGAAAATGAGCTGACGTGGTTTACATTAATCTTTAA
GmaAffx.39219.1.S1_at	AW397891		0	No Homology to Known Proteins			CATTTTCGTGTCTTCCTACGTTTTGGCTTGTTTTATGGTCAATGTACCTGTATAATTCAATTTGTCAATGAGTAGAGACCACAGCTGAGTTTGTTAATTGTATTACAC
GmaAffx.40079.1.A1_at	BE659417		0	No Homology to Known Proteins			GGAACTAGGAACAATTACACATAAAATTAATGACTCTGTATGACCCCTTTGGTGTATCCTCTCTTTGCTTACCCACCCTTCTATTTCAAATAAAACCATTACTTTGACTACAGTAGATTTCCAAGATCAAAGATCAAAATTAAAATATGGAATTTGCATTGTTGGATTTGGAGTATAGTGGTTTGGTGTCCTTCACTTGCTAGTTCTAAACTTT
GmaAffx.41216.1.S1_at	BI470523		0	No Homology to Known Proteins			AAATAGCAATCGCAGCTGTCAATATCATTGTAATTCATCAAATCTTTTAGTTCTGTCCTTGTATTTCATGGCCTGGAATAAACTCACGTTACA
GmaAffx.41441.1.S1_at	BI945114		0	No Homology to Known Proteins			GGGCTTACTGCGACTTTGTTCAAAGTTACTTTTTACCTTTTTCTTTTCTTTATTTTATTCCTTCTAGATTATGTCCTCTGTGTTCACGGGTCACGCCTGTACCTAATACACTAGGAATTCGACTAAA
GmaAffx.41482.1.S1_at	BE658054		0	No Homology to Known Proteins			GCTCCTCCGTCTTGGAATGGTCCAGTGTGGAGGAGAATGAGTTGGTCGTTCCTGTTGGTTTCTCTCTGCTCGTTTACGCTTGGAAACGCTGAAGGGGTACTATTGGAATTTTCGATTGGTTTTCTTCTGTTATGCACTGCTAACTCGTTAGAATTTAGGATGCATGTGTGTGATATTTCCCCCACTAACCCATTCGTTTCGTGGACATACATAATTAGGGATTGAATAAGTGGAATTAGAATGTACAAGCATAAGCATGTGAGAATCTATTAGCGGATTCGAACTTGACCATTGATGTTACAGATTCTTCTTTTGGAAGTAGATGGAACTCTGTTGTGAGTCTTTCTTTTTTTTATCTTTGTACTTGGTATCTGGTTTTATCTGGAACTTGATGCCATG…
GmaAffx.41489.1.A1_at	BI970248		0	No Homology to Known Proteins			GACAATATAAATTCTCCATGATGATGATAATAACCTAACTTTTTTTTAGGGGGGGTTTTTGGGTTACTTTTTTTTTTTTTGTTAATCTTTCCTTGTCAATGTGAATTGTAATATTACTTAATTTGGGGGGTGGTATAATCAAAGAATTGGTGGGAGAAGGTGTAATTTTACTTGTTTGCTAATGTAAGGTTTTAGAGACCAGTAAGTAGTTAGTTTGTGTGTCATGTCATTAAGCTCAAATGACAAATTCAAGAGGGGGATGGAATTATTGTTACGTCCCTAGTCCCCTGGTATAAGATATTAATG
GmaAffx.41710.1.S1_at	AI416911		0	No Homology to Known Proteins			TTGGATGAGCATTGAACTGAATTCGAAAAAACCATTCAGTTTCTGGGATCACAATTTACCAGCTCTTGGGAAGATAACATAAAATTGGAATGTTACTTGAAACTCCTCCACCATATCCCACAAAACAAAACACAAAAACGGGAAAAATACATTTATTCAGACCCCCGTGTACATAAATTCTCTATTTCTTTCAACAGTTTGGTTGTTTATTGTAATGTAGTAGTGGTTGTTTATAACATGTCCATGCAAGACATGTTTTGTTAATGTGACTACTAGCTTTCAACTTATCCTTTCATGAGAACATTTTGTGTTGGGGGGGACTCTTGCAAGAACACAAGCAGAAGCAACTTGCTATGTGCAACTCCTTTCGTTCCGTAATCCACTCTTGACTTGGTCTTT…
GmaAffx.41908.1.S1_at	CD412825		0	No Homology to Known Proteins			TATGTGGGCGTTGACTGTGCCAACAGGGATCATAGGGTGAGGGTCTCGCTCATCCAATCATTCCTTTGTTATCTGCACTAGTGAGTGTCGTCTTCTGATAAAACGACGTCGTCGTCACACAGCCTTGGTTAGAAGAAGAAGAAGAAGAAGGTATGGGAGACATATTCTACGGCAACGATGACCACCGAGAAATGAATGATTGTATGTATAAGGAGGATGTGATAGAAAGCATGAGAAAGCAAAGGGAAATCAAAGAACTCAAGCGCAGACAAAACAACAACAACTACTGCTGCTGCTACTTGTACTTCCTTCGATGCTTTGATGACTTTCTCACGCTTCTCCGTGCTTTCATCAACTTCTGATCGATCATCCTTTCATCTCCTTGTGACTAGCTAAGCT…
GmaAffx.42322.1.S1_at	BI424151		0	No Homology to Known Proteins			TGACGGAGTTAACCACGCCGGAATGGGCGGCGTCGACGAAAAATCGTCCTCCTCCGGTGGAATGAGTTCCGGCAAGAAAGCGGGAATAGCGTTGGGAGTTATCATCGGTGCCGGAGTGGTTGTGTTGGGAGCGCTGGTGTACAAGAGGCGCCGCCAGAACATACAACGGTCTCAGTACGGATACGCAGCGAGGAGAGAACTTCTGTAGGTCATAAACATTCAGTAATGTTCTAGTTTTTCT
GmaAffx.4245.6.S1_s_at	BE059910		0	No Homology to Known Proteins			GATAGCTTGGCCTCCTTGTTCTCTAGCTCTAATATTGGAAAAGTTGTTGTTCAAGTTAATAAGGCCTAGTAATGTGCTTGATCTTGATCTCAATAATATTTCAGCACCAGATATTGAACTCTCTTCCATATTTCTGTCCTTTATTGTAAACTCGTCTAAGAAGGAA
GmaAffx.42516.1.A1_at	BU546094		0	No Homology to Known Proteins			GTTCGTCAACTTTGCCTTGTATTTATTTGTTGTGCGTTTTTTCGTAATCGTGTGTATTTCTCCGTATTTTTCACTGATATATTCCGTATTTTTCACTGATATATTTTCGTGTGTATTTGTTTACTTGGTGAGATACGTTTACAACACGTATTAATTCTTTTTAGTTTGATTTAATTATTTGTTGTTTTTATGCTATTAATAATTGTTTCTAGTGTTTGTTTTGCAGGGAATATATCTTTGGTGGCAACTGGCAAGTGGGGGGGCCAACACGGGACACGATAACGCATAACGGGATTGGTTGGATCCAACTCCAAGAACAGGATAAAGCTTTGTTAAGATTAGAGTGCAAGACACAATGTTTATCATCATCAATATAATCATATAATGATGCACCATTAT…
GmaAffx.42570.1.A1_at	BU549067		0	No Homology to Known Proteins			AAACAGCCATCACTGATCTAATTGGCTTTTTAACTTATGTTCTAATATGTACGGTGTAATTTAATTCTCTCCTCACTACCATGTCTATGAAGACTTCTTCCCTGATCTTCGCTCCAACTACTAGCATTGTTTTTAAAATTTCGAGTAAAGGGTGTGTTTTCATTTACAAATTTTAGTCAATGCTATTAATGTCTTGTTTA
GmaAffx.42697.1.S1_at	AW757026		0	No Homology to Known Proteins			TATGATAGATCCTTTCTTTAGCCCTTTTTTTTCAAGCATTTTTCATACAGAAATGCTTGTTACAACAACCCTTTTGGCCTTGCTACTTGAGGCCACTTCCTTTATGCTATGGTTCCGTGAGAAAACCTTTACTATGTCTTGGTTGATGGTTGCCTCTAGATAGATAGTACATTGTATATGTTGTCGCTTTTGTATTGTTGGATGTTGCACTTGCTCATACTTACGCTCTTGAA
GmaAffx.43216.1.A1_s_at	CD414339		0	No Homology to Known Proteins			TTAACTTTAGAAGATGTGGGCAAATGAACTCACCTGGGTGATGGCTGGTTTTTCCTGCAGCTGTCTTCACTCCTGCTGAAAAATCCTCATTTAGGAATTTTTGAATTGATCCGAATTCAAAGTACAGAAGAAAAAAATGCTAATGTTGTGGTGAAAATTGTAGCTTTGTGCTCACAAATTTAATTCTCCATTTGAGGGTATGAAAT
GmaAffx.43551.1.S1_at	AW101224		0	No Homology to Known Proteins			GTGGATGTGCATGCGTCCATCGAAAACTCTTGCTGAGTGTGTTTTCTCAGTGTCTGCTCGTGTTTTTATATAAATAA
GmaAffx.43695.1.A1_at	AW278143		0	No Homology to Known Proteins			TATATAGAGACTTCATGCGTGGCTGGTTCGAGATCTAATGGAATTCTGTTGGTGTTATCTGTCTAGTTTGAAGGATTAATTAGGAATTGGGGAAAGAATTGCAAAGATTTTAGAAAGCTGGAGTAGTTGTGAAGANCTGTGGAGACGAGGAAGAGAAGCATGTNTTTAATTTACTTAGCTCAGTGTATATGTATATNNAGTAAGAACTTTGATTTCTGTGTTTTTCTTTTGCNTNATGTGTTTGGAATAAAGAAAGTGATCGATGATGGGCGAATTTTTAATGGATTNATTTCTGAATANNNNNAANNNNNATACATTTTAATTTAATTTATGAACTCTACTGTTTTTTTTTTTTAAAATATAATCCTTGATATTTTGTTGGT
GmaAffx.4451.1.S1_at	AW100961		0	No Homology to Known Proteins			CACCAGGTTCTCATGGGCACGGCGGNATGGGAGCAATGCTCNCNGGGGGTGCTGCNGCGGCTGCTGCTGCTTATGGTGCTCACCATGTCTCTCATGGCTCCCATGGCTCCTATGGCCAATATGCNNNACATGGTGCTCACATGCCACATGGAAAATTCAAGCAGCACGGNNNGCACGGNAAGTTCAAGCATGGAAAGCATGGCAAGTTCGGCAAGCATGGAAAGCATGGCAAGTTCGGCAAGCATGGTGGANNNTTCAAGAAGTGGAAGTGATGAATATGTATCTATGACTCCAAAATGCTGCTCTGTGTAGAGCTTATTATTGCTTTATAATAAACCATACTTTGAATGATGNNAGGGATCGATCTATGAGATCATGATACTTGACCCCTTGTTTTC
GmaAffx.44838.1.A1_s_at	BE822969		0	No Homology to Known Proteins			TTAATTTTTTGCATGTGGCCTTTATTTTCCTTTTTATATCCCTCATGCATATATTCAGGACGGCGGTAACCACCACGTCTAGGTAGCACCAAAAGCCATAAGGTATTGTAATCACCTCTGAATTACTTATCTGCTGCGTTCCTTTTTTCGTGGCATGGAA
GmaAffx.46118.1.A1_at	BI784649		0	No Homology to Known Proteins			GGGCCTTCAACTCTATCGAAACTAACTGCTGAGGAAGCTGAACATCAAGCTCTTCAAGCAGCAGTACTACANGAGTGGCATATGATCTGCAAGGATAGAACAACTGAAGTTAATTAACTATTTTCTTTTGGTGTTTTTGATTTTTCTTTTTTCCATGGCTTTCCGAGAAATGTACGAGTGTATTCTTTGTAATTTTTTCTCATTTTACATACACGAATTAGGTAGAAGCCAAAATTTGCCCGAGAAACGTTCGAGTGTATTCTTTGTATACTCTTTCCCATAAAACAGGAAAGTGTTTTGTACATGTACCGCGCGGCTATTGATCTGCTATTTTATATTTGAAGCATTTGTTGGAGGTGTTAGGCATTTTTTTTTTCTTTTTAAGGTTTAAATGTACTT…
GmaAffx.47518.1.S1_at	CA819417		0	No Homology to Known Proteins			GAAAAACGTGTGTATCTTATTCCAATTGGTTAATTTATTTTTTCTTTTGACCCATACCATGTTTCCTTGTTACCTAACTCAATT
GmaAffx.47778.1.A1_at	CD408545		0	No Homology to Known Proteins			GAAGAAGGTACTCAACACTCTTCATCTCTATTTTTTTTTTCAATTTATTTATTTAATTTCTTAATTATTTGCTACCTAGAAAATAAATTTGGTATTAGGTGTAGCGATTTATTATTTGGTTATTATGTGTATAATTAGGTGAGGAAAGTGGACANTGCTTGAGGGTGTTTCCGTCGTTCGATCTGGTCNAACTTCCTATACTAATTTCTTTTTTTATTTTTTATAAAGTCATATGCTATTTTCTGGTTTTGATGTTTTTCGGACTCTACACTAAAGTTTTGATGT
GmaAffx.47806.1.A1_at	BG508458		0	No Homology to Known Proteins			AGTTATTGGAGGTCGTTTTAGCATCATGTGATCATTTTCCTTATCCTTTGTAACCTTNGGGAAATGTCACTTGCACCTTGAAAAAGCACGAGATTGAAAAAATGAATGTAATATGTTTGAAGTTTTTCTTTCTAGATCTTTTCTTGCCATTTAAGCTTTTCTTTACTNCAAGAAATTGTAAAATAAAGGGTCGAAGACAAAATCTATCAGNTGNGATTTTCATTTTCATTCCTCCAATAAAATTGCT
GmaAffx.48094.1.A1_at	AI988060		0	No Homology to Known Proteins			AAATTTATCTTCTGGTTCTGGTCTCAGTGTGTTTTGGAAGGGGATGGAGGCATTGATTTGGTCCCATCTCCTAAATGAAATCTGCATGTCACTTACGCTTCAAAAAAT
GmaAffx.48423.1.A1_at	BI969977		0	No Homology to Known Proteins			ATTCTTGAGTCCTCCTTTGTACATTCTCAGCATTTTCATTGTGTTACTTTCAAATCAAACAGAAATGTATGTATGCAAGATAAAGAAATTGTATATGTTCCTACCCCAGCAAAGGGGGGCTTGGAATTCACACTGTACAGTAGAAAGCTTAAACACCAATGTACATACATAGCTTAGTGTAAATAGTTGTGCTCAGTAGCATGTTACCTAGGTTGTAAATGGAGCAAGTAGTTCTTTTAGATTATCAAGTCCAAAAGAGTAAATAGTGCTTTTAAGTGGTGTGTTTGGA
GmaAffx.48466.1.S1_at	AW396563		0	No Homology to Known Proteins			TAATATTTTATTTGCCTGTTCAGATTTTGCTCTCGACAGTCCAGTTTGTGATTGGAGATTGGCATATTTATTCCGCATCTGTTCTGAGTGCCATATTTACTTGGTTTT
GmaAffx.48948.1.A1_at	AW310566		0	No Homology to Known Proteins			GAGGAACCAGAACCAGAAGTTGTGAAAAAGGAAAAGANNAANAAANGGAAGGAAACTGAGAGTGCTGAGTTGCAGAATGGGAATGNCGATAATGCAGGAGAAAAGAAGAAAAAGAGAAAGAAGCATGCCGAGAAGGAAGAATCTCCTGAAATGCCAAGCAAGAAGAAAGGCAAAAAAAAGAAAAGTGGGGACTAAGGTGAAGTCATCTGCTAATCAATCTGGTGAATGACAACCATTTTTGTATACTCCGGGCAGCTCAGTAGTTTGTTTGGTATAATTTTTGTTTTCATTTTTATGCAATTTGTAGCTTTATACATCCTTTATTATTATTTAATGGGCTTGAGTGGATAAT
GmaAffx.48979.1.S1_at	BE058912		0	No Homology to Known Proteins			GAAAAATTCAGGGTACAGTCGTACAGAGATGTATTTAAGAGCTGTTTATTGTGGCGCTAGTAGATACTTGAAAGCATTGATGCAAAGTGGATGTGTTCTTTTAATAATGTTATTGTGCTGTACAAGATTCCCCATCCACCACCTCTGTATCGTTTCCTTTTTGGTTGCTGTAATTTCCAAGCCTACTAAAAGAGATT
GmaAffx.4898.2.S1_at	BQ297235		0	No Homology to Known Proteins			TGTGCCAGTCGTCGCCGGTAATAACAATACCGGCGTCGCAAGCACGCCGCCGCAGCCAACGTCACCGACTTCTTCCACCGGCTATTTGTCAATTTCCTCTGCTTCCTCTCTGGAAAGATGTCGTTTACTCGGGCGTTCTTTATCCTTTTTGGTGCCGTTGGTGATGGAGCTGTTGATTTTGAAGTTTTGAGGATTTGTGGGTTCAGAATCCAAAGAAAGACACTGGGGCATGGCAATGGGGAGGAAGAGCAAAGGCAGAATGAGAACGGAGTAAAGTGAGTACACGTCGTCTTTGCAGNGAGATGTCGCTTACTGGTCTAGGAAGTAAAGGTAGTTGTTTCAGGAGCTTTTTCAC
GmaAffx.4922.1.A1_at	BI970569		0	No Homology to Known Proteins			ATAGTGGCTATGTTTGATTTTTGGCTCTGGCCTGCTGTGTCCCGAGACACCATTTGATTCATATATTGCCCTCACCACAGAAACTCAGTGGACTTAGTCGTGCTGTTGTAACATTCTTGCCTGTGTCTGGGTTGGATGTTGTGGCAGTCATTGTTCAATTTATATGTGATTCTTTCGAGCGTGTTATAGTACAGAAGATTGTAGTTTTGTGTTAGATGATAGAAATATATTCCTTTTTCTGT
GmaAffx.495.1.S1_at	BE057825		0	No Homology to Known Proteins			GTATTTTTCAGTATCGATTATCGTTTTCATTTTGTCAAATTTTCGGCTATTGCATCGTGGCTGTTTCTTTCTTTAAA
GmaAffx.49801.1.S1_at	BQ627796		0	No Homology to Known Proteins			TACGTGCATGCGGAAATCGATTAAGCACGTCCCTCCAAAGGAACTTCAACTAGTTAGTTGTAAATAGAGTTGAAGACAAGTACATGTACACTAGTATTTTGATGAAAAGAGCTCAAATCTACCTAACCTTAGTGTTATCATTAAATTCA
GmaAffx.49999.1.S1_at	BG510206		0	No Homology to Known Proteins			CACCCTTTATCAAGTATTCACCCTANNTTTTCNTNNAAAANNANATNANATNNTTNTTTTTGTTGANTTTTTTNAATCAATTTATTNTGTAAAATTTCTGACTTTNATNTNTTTNTTNTTANNNTAAAACAGCTACCAATCAGAAATTGAAGATTCAGGAGTTGGGGCTGAGCTTATGGACATTATTCTCCCCAAGGTTATTTTTTGNCTCAATCTTCATGTTGAAAAGAGTTTTTTTTTTNNNCTTTAAAATTGTTTAATTTTTCCCCAAAATATTTTAAATGAAAAATATATATGAAAAAATTGGTTGGTTCGTGTGATTCCTCAAAGATGTNACAAATNTGAAGTTTTAATTTTGGTGTTGATTGCTAGGGAATAGAGATGCCAACATCTCTATCA…
GmaAffx.50897.1.S1_at	BM177461		0	No Homology to Known Proteins			GATGATCTATAGGAAGTGGAGTCTCCTTACCGGNCCGGTCNCCATTCTCGGCGGCGTAGTCGTCGCCATCGCCGCCGCAAACGTCATCTTCGTCAAGAATGATCCTTTCCTCAAACCAGAGGAGAGGAAGTATGAAAATGAACCTGCTACCAAGTAGGAGAAAAGAGACAACAGAAGTTTGCGTTTTGATGTCTTTTAAACCCTGATTTATGAGCTCTGTATACTGTTTTGCAAGACANGCTCTNGGTAGTTAATAAGATTGAGATTCTGAATGGAGTCTGGACTCTGGAGCACGGGCCCTTAGTTTAGAACTAACCTTCCAATGTTCTAGAAAACTGGTTCATATTTCAGAGATCCTTATTTTTCTCTTCTGTACAATGTCAACTGCAAAT
GmaAffx.51412.2.S1_at	BI424433		0	No Homology to Known Proteins			CTTGGCTTGGAGTGGTGGTTCTAAATNATATCAAAGAANATAGCNNTGAGTATAGATTTNNGTTATTCAATCTTGAATNNGAAGNGGTGTCACTCAAGGCTACTATCATTTCTTGTCACTATAGTGTAGATTTATTTCAANAGCNTTGCACAGATNNTGGTTTTNTGTGGTTGAAGATTTCTGCACCTGTCAATGATTANGGGATAAAGAGCNTATTCTAATTCAGGATTCTCNTTTAGGTTTCCTGACAAGTTNTTTCCAAGGAATATACTGTTTCTTCTTAGGAGGACCACAATTCTCAGAGGATGATGCCTCCACTATTTGATTGGTCTCCAGAATATTCTGTTGCCTTATGAACATTNTCCATTGTTTATTTCTTTTGCAGGTCGGATTGGTAAA…
GmaAffx.51455.1.S1_at	BQ627628		0	No Homology to Known Proteins			TAATAGACAATACTTGATTATCATCTGGTTTTGTCTAATTCTACCCTTTTATTTTCTTTTCTCTTTTTTATTTTGTTTTGCATATTTTCCCATATTCAGANNNNNNNGTTAGCTGCAAAAATTGTCTATAGAGTCTTTTATTTTTTGCTAATGTGGGTTTCTTCTCAAATCTGTTGCTCACAATCCTTTCTGAAGCATGGATCAATCTTCAATTGCTNAGAAGGAAANGAGTTATAATAAAAGAGTATCCTAAGAATTGGCCAGTGGACAAGATACAAAGACCATTA
GmaAffx.51464.1.S1_at	BQ628397		0	No Homology to Known Proteins			TCTCCCAAATACATGCTAGTGTTGTTGATAGCATTGGTTTTGGCAGTCTCGTCCCTTTCCCATGGTCCAGTACACGGTTCAGTACACCCAAGGCCTCATCCTCCTCCAAAAATTACTCGATACTCCGCGCCACATATACATAAACCAAAACCACCAAACGTGGCAACAACAAACACCTATGCAGCAAANAANCCTCCAACTAAAGGTTGAACTGTTAGGCTATGATCAAAGGTTTTGCAACGTCAAGGGAGTATATTACAACAGTAATCGCAATTTGAAACCTTGACTANAGATACTTTAATGGCATATAGTATTAATTAATGGTCAGTGCTATGAGTATGCATGTATGATTAAATAATAGTTAGTTAGGAGTTTGTTTGAACTGTTGTAATACCTTGT…
GmaAffx.51829.1.S1_at	BU763894		0	No Homology to Known Proteins			ATATGTACATGTAGTGTGCGCGCTATACTTTACGTATGTTCTTAGTGAGTGGGTTGGGTTCATGTTTTCATACTAATGCACGCTGAGACAGTGTGTGATATCGGAATCTCAGTTGAT
GmaAffx.52108.1.S1_at	BQ474028		0	No Homology to Known Proteins			GGACGAACTCTGAAAGACCAAGGACAATTTATAATTTTTTTTATAGTAGTTTTGCACTTTTGCTTCTCTTACAAATAAAAGAATCTTATTTTCCATTTAAAAATAAAAGTGTTGTCAATGTCATTTAATTGGTTCAAAATTATCATTTTTGAATCAATTGACGAGGTTTGTGAAACAAAAAGACTATACAACACTCAATCAAATGCGATTTATTTATTCTGAGACCATGCAATCCAATGTAACCAGTAAATTAGTAATCCATGTGTGAAGATGTATGA
GmaAffx.52155.1.S1_at	CA935218		0	No Homology to Known Proteins			GATTGAGTCACTGTAAAATTTGTTTGTTCCTGATTATTGCCTCCAAAATTCTTAGCTTTTGGTCATTATTAAAGAGAATGGTAGGTTGGACTTCTCTTTCCTTTGTGTTTTCTCTAATTTATATTTATTTATACCTGACAGAGTGCTATCTT
GmaAffx.53416.1.S1_at	BE023752		0	No Homology to Known Proteins			GAACTTCGATCTTAAAGTCTTTTGTATTATTTAATCATGTTTAGGCTTGTTGTGGGTTCATGGAGTTTAGGTTGGTACTTTTGCATGCTTATGATGAGACACACACCATTATTTAACGTATT
GmaAffx.53683.1.S1_at	BM523484		0	No Homology to Known Proteins			GACTATGGTGCTGGGTATCTTGTTCAGCCAGTTGGACAGTCTGATGCTCTCAATGCTGGAGGAGCTGATGTGGATGGTGGAAATGATGACGATGGTGAAGAGGAGGATGAAGTTGATGACGACGACGATGATCAGGTGTTGCCTCCTCCTGACTCTTCCCACAAGAGGAAGAGGGATGATGAANAGGACGTGGACGACGATGACGATGTGGTAGCATTCACGAAGTCACCCAAGAAGCATCATTGACTTCTATTATATATATCAATGTTCTTGTTCTGTTTCAGGCTTCCATGTGTTGGAAGCAGGGAAACCTCAGTTTTAGATAGAAGAACGATTGATTAGTTTTTAGGAATTTAGCTCTCTCATGAACAG
GmaAffx.53750.1.A1_at	BE659777		0	No Homology to Known Proteins			CAATATGCCCCTTGCATTGCCAATTTTGTTGTACCAAATCACACTGAAATGAGTCTGACTTTGAGCCCAATTTTTTTAAACTCGGGCCCAGGCCTTATTTTTGTTTGTTTGTTAGTGCTAACCTTCTTGGTCCTTTAAATGCTCAATGTATGT
GmaAffx.53957.1.S1_at	BF008940		0	No Homology to Known Proteins			GTGGTCTCAGACGTTTACATGTGTCTCAGTGGCATGTAAAACTAGCTTTTCACATATTGCTTTCATATGAAGATTGCTCGTCATGATTTGCTCCTTATCGTTAAGTCGTTGTT
GmaAffx.5401.1.S1_s_at	BM732974		0	No Homology to Known Proteins			GCTGTGGATCCATAAGGTAGACAACGAGTTCNAAAAGAGAGAAAAAAANGGAAATTAAAAAAGAAAAGAATTTGCTTTTTTATCTGTTGCCTTTTTTTTTTTTNNGCCGTAAATGTAGAATTTGCTTCGTGTAATTTGACATTTTGACGTGCTTTCTTCATCTTCATTTTTACTGCCCATATGTTGGGTGAGCTGTAGCCA
GmaAffx.54278.1.S1_at	BG154611		0	No Homology to Known Proteins			TTCCCCTTGGCGTAGTGTAGTTTGATAATAAAAAATTGTGGCTGTAAAGTCCTTCGATCCTAGTTAAATTAGTAGATGCGTTTAGGTCACCAAAAA
GmaAffx.5448.1.S1_at	BU549130		0	No Homology to Known Proteins			GTACGAGGATCTTGAAGGCCCTTCTTCAGTTGCACCTCTCTCAGATTTGGAATGCCTGCAGTGGGATGATGACTACTGAAGAACAAGATAAGAGAATTGAATTNNANATNTATATATATATANNNAAAAGCAAGTTTGCAGATCCATGGTTTTTTNCATTGTGGGATCATAAGCATCGTGCATAGTAAATTAGTAATCACGTACCCTTTTTTTTNGTTGGATTTTTAAAACAGTCTTCTACATACTGATTTTAATTATCATTATAAACATGATCATACACATCATTAGGACATCATCATAGGGAAAGTTCTTGGGTACACATACACTGTATAGATTTATGATATCCAGGCCTTTTCGGTGTTAGTT
GmaAffx.54898.1.S1_s_at	BQ452830		0	No Homology to Known Proteins			GAGTCTGAGTGTATCACCTCTAAGCTACGATCTTCATGACTCATATGAGGTTGCTTCTATTTATTTGGTGGCCATTTTTCAAGTGTTGTTCTTACTAAGTTCAAGGAAGCGACAAATCAAAAAGATTCAAGACAAGGAAGCAAGATTAGAAATGTTGATATCAATTCAGGCTGCT
GmaAffx.55834.1.S1_s_at	BQ453267		0	No Homology to Known Proteins			CAGTGAATTTCTGATCGCACCTAATATATTGTCTTTCGATAGGTTTGACAGAATTTTTCATCGTTCTACAGTTTTGT
GmaAffx.56430.1.S1_at	AW734641		0	No Homology to Known Proteins			GTATATCATTAGTATTGCCTCGGCAAAGGTAGTGGAGAACTAGTTTCTTTTGATGTTAATGATGTTGTTGAGTTGTCTGATGTTTTTTTTTTTTGGATTTTGTAACTTATGCTTTGTGTTTGTTGTTGCTAGACTAAATTTTTAGTTCTAGACTCTAGCCTCTTGTTTTGCACATGTATTATGTATATGTATTACCTTTGGTGAATGAA
GmaAffx.56626.1.S1_s_at	CA935145		0	No Homology to Known Proteins			TGCACTATAGCATTTCTGGTTTTCATTTCTGTAACATTTTACTTCTGGATTTTGTCTAAATTTGCATTGAAATGTATGATCGGAGCTTGTGGATTTTGTCTGGATTTGTTATAATCGGAGCTTGCTTTCA
GmaAffx.56846.1.S1_at	BG508287		0	No Homology to Known Proteins			TGCTTGACATTATTACTGCTATTGTTTCCTGCTTTTATTGTTTTTTTTAGCTGTTTTCGCTTTGTGATGTCCAGATTGCCGCAGTATTTTGATNTTGATTAACTAATTAGGTTTTTGAGTGCTGTGTTAAAATGTGACTGGATAGGATTGGAGATGGAAATGTGATTTCGAGTAATAGAATTNANANTGGTCTCACTAAGCACATTTATGCTGATAAAAGAAAAACTAAGTACTTTTATGGGTTAGGCAAATAG
GmaAffx.5704.1.S1_at	BQ610264		0	No Homology to Known Proteins			GATTTTGGTTGTGGAGCCTCTTCTTTTCTTTTTCTTTTTTACCTTGGATGTAGGTATATTAAAGTGGAGTTTTTTTTAACTCTTTTTTCGTTTGCTTTGCTTGTGAGTTGTGACGAACTTTGTTACTGGGTAGAAACAACAAAACCATCACTCCCGTTATCTTAGTTAATCCAATGGCTTTCTTATGTTTTTTATGTTTGCAAAGCATTCTCTTTTGAGATTTA
GmaAffx.57489.1.S1_at	AW395358		0	No Homology to Known Proteins			TTCCTTATCAATGCCTCTAGGAATTTATGTATGGTTGCGTTATGTTGGAATGCGAAGCGAGCGTGTGGGTATGAGCATGATGGCATTCCTTTTCTAGTCAAAAAA
GmaAffx.57748.1.S1_at	AW306274		0	No Homology to Known Proteins			TTACGCGCTGTTGAGGAACTTCCGCGANGCNNNNNNNNGCCGGCNAAGGGAGTTGGTGGAGTTGGAAAAACACGAGAGCAACATCTGGAAGAAGNATGATGAAGGGCACCGCCCCAANCTGCAACNGAAGGACNAATAAGGCAGAAGTTTCTTTCGAATTTCAGGACTTTACCACCGAGATTCAATTCAGAAAGCCACCTTTGGTTTTTCCTAATCCAGTTTCATCATGTGACACTAGCAAAGACAACAACAAAGGTAACAAGAAGAAGAAACAGCAGGATCTTGCTCTCGATCTCAAACTCGCTCTCTAGTGATGATCACCAATATCGACCTTCAATTGTATCAGAGTTTTCTCAAATGGCCGCTTATATATATTATTATTCCTGTGCTAATTAACGT…
GmaAffx.58529.1.A1_at	BE821142		0	No Homology to Known Proteins			CCACTGATGAATGATTACGATCACGATTAATTCGGCCCCGACAGTATTATCTTCAATTGAAATTACGTGTGACTTAGAAGAAGAAAAAAAGATGATGATGATTTTGTTTGTAATTTATTTTATTTGTTTTGGGTTTTTTTTTTAATTTTGTAGATTTTTCTTTTTATGATGGGTAAGTAGGGATTTTAATTTGTAATTGTTATTGGCCGTATATTGGTAGATGCTGGAAATTGAAGATTCTGCT
GmaAffx.59155.1.S1_at	BG511534		0	No Homology to Known Proteins			TTCTTCTATCCACAGCATATTCATTATATATAATAAAAGGTTTGAGTCTGTTTGAGTGTCTCNNNNNNNNNNNNNNNNNNNNNNNNNNNNNNNNNNNNNNNNNNNNNNNNNNNNNNNNNNNNNNNNNNNNNNNNNNNNNNNNNNGGGAAAATTAGTTGTCGCCAGTGATGGCATTTAAATGTATTGTGGGATTTCAGTGCTGTTAGTATT
GmaAffx.59384.1.S1_at	AW184917		0	No Homology to Known Proteins			AACCATCACCGTCCGTGGGAATGATGATGCTTCATATGGAGGTGGAATTACAGTTAGTGGACAAAATTCACCTCTTGGTGGGCTTGGAAACTTGGATAATATTCCTTGCAGCGATTTCAATAGTGGAATCAATAGTAATAATGCTGTGAGCTCTATGACTAGCATGTGGCCTTAACGTTATTCTTATTGCACCACATGACTTGTGTTGTAGTAGTACTGTCCGGTTAGATCCAACTTTATGCATGTCTTGGTTTTATTAGATT
GmaAffx.59682.1.S1_s_at	BI945169		0	No Homology to Known Proteins			AACAACAGCCCTTGTACTGTGTGATGATATCAGTCTACTTTTATTCTCAGCTACTTTTAACTGTCTTTGGGATATGTTCATTGTTCAATACCGAATGATGAATATCGATCTTAATGTCTGTCTG
GmaAffx.59686.1.S1_at	BI945697		0	No Homology to Known Proteins			AAAGTTGCATTTCATAACTTGTAATTGAGCATTTGGAACATCTATAGGAAATACAAGGCTTCGATAGTCGGATTTTGTATGCTTCTTGATGAATTAATGCCCTTGTTGATTTTCCTGTAACTGGGAGAATTGTTTTGAAGTTCTTTAGATTCTGACCTTTATTGATTTGTGTTGAATTCTCTGTCAAATCCTTTATGCTAATGTGCACATCATTGAGTTTCCTTTT
GmaAffx.60156.1.S1_s_at	BM523697		0	No Homology to Known Proteins			GATGATACATTGGACTGCTCCTTTGGAAAGTGTATAGGCCACTTTTGCTATGTTTTTTACATTCAAAGCAATTGGTTGTCTGCTTGAATTGTCATCATGTG
GmaAffx.60419.1.S1_s_at	BQ611901		0	No Homology to Known Proteins			CCCCTGATTACATTTTTGTTAAGCGCAGCGAGTTT
GmaAffx.60419.1.S1_x_at	BQ611901		0	No Homology to Known Proteins			AATTGCTTTTATTTATCTGTGTTTTAATGTGTTGTGTTTGTCGGAACCCCTGATTACATTTTTGTTAAGCGCAGCGAGTTTCAGGACTTTGCTGCGTTGTGTTGCTTTGGTTTATTAAATGTCAACTTTCTAT
GmaAffx.60846.1.A1_at	BU550268		0	No Homology to Known Proteins			GGTATTCAAATTATCTCCTCTTCTTTTGAATTTGAGAAACATTATGAAATCCCTCATGGCAACAATGGGTGGCTACAAGAAGATGTTGGTGTTTACAACAATTCTGCTACTAGCTTTACAGCAAATATGGGCATTTAGGCCATTAAAAGAGGATCAATGGTTGAAGCAGAGGCTAGTAATACAATCACTACACAGAGGCTCCGAGCAATATTCCGAAAGAAATCCATGCTCCACCGTTCCTGGGCGCAGTAGTCGTAGAAGCTGCACTTTTGTTCATGCAGCACCAACCTTACCAGAAGTTGCCAATTAGCAGCTTCTACTATATTATATTACATTATATATATTAATGGCTTTCTATCTCGTGAGACTCAAAAATATGTCTCGAGTTCTTGGTCGATC…
GmaAffx.6134.1.S1_s_at	BU765221		0	No Homology to Known Proteins			GTATCCCAAGACTCATTATCCTCAATTGTATTATTACAAATTACATACTAGGTGTCATTGCAAAGCACCAGGCACAGTACTGACGCCTGTGTTGTTGATATTGATACTTTATT
GmaAffx.61480.1.A1_s_at	CD409997		0	No Homology to Known Proteins			TGGCCACCCTACATTCAAGGAGGAGTATGACCTAGGCTTGTCCAGTATTGTGTTTTTTTTTTCCTTATCTTGTTATCCTCTTTTCCACTTGTTCAAGTTTTGATTATTTTAGGATGAGAAGGGGTTTCTTTTTAGGAAGCTTTAAAAGACAATAAATTGTACAAAGGGTAGACACATACATGTTATTGTTCCCTTGAATCTGGGACCCTTATGTTTGGCCCATCATTGATTTGA
GmaAffx.61861.1.S1_at	BM270636		0	No Homology to Known Proteins			ATGATGACGAAAACAACCGTTTGTTTGTTTGTTTATTCTTAATCAGTTTCTTATCGAAGAGCACCTTCACTTGAGACTTTGGGTTGGACTTAGCTGGAGAGTATTCACATTCTGTGAACTAAATATTTGAAATGCCAGCTATGGTTTGTTATCTTCTCGGTTTGTATTTAGTAGTACTGCATTATTAAATGTGTAAGAATGCTATAAAGCAGATTTGAATGTTTGAAAGTTCCCCAATACAATTAAGTG
GmaAffx.62105.1.A1_at	AW350296		0	No Homology to Known Proteins			CCTACTCCCAATCATTCAGTGTCGAGGCCGGTGTGAAGGACTAACTCTGGTTTAGGTTAATTAGGAACTCCATGGTAGATTTGAAATATCTAGTTTACAATTTTAGTTGAAAAATCATGATCTGGTCTCAGTTACTTTTTGTCTCCACTGTCTTTTGCTGTTGTAAAATCTAATTCCATGTTACTTGGATATGCCTCTATTATATCGTTTGTGTCACGGGCACAGGGTGCAATCTGTTTGTGGATTCATGTTGTCCCTGTCCAATGTTTGTCTGCAATG
GmaAffx.6418.1.S1_at	CA935147		0	No Homology to Known Proteins			TATGCTTCGCTGCTTCTGTTACAGACCCAAACGGAATGGCAATATATATTTTGACCATTGTCTGAACTACTATTTTGTTTTAGCTGTGTTAA
GmaAffx.65026.1.S1_at	BQ612000		0	No Homology to Known Proteins			TAAATCTCTTGTTAGTTTTCTTTGTTTGGGGGTAGTTTTTTATGTTCAAATGTGAACTTAAATTAGAATATGTTTTTTGCAGTAGATACTGTTTTGTTACTTCTAGTTTCTTGTCCGGTGTATAGATGTGGTGTGTGGATTTGTGGAAGCTACTTCTTTATGTAAATTT
GmaAffx.65048.1.S1_s_at	BQ628412		0	No Homology to Known Proteins			ACTACAACGGGAACCAGAACCAGCAGGAGTTTGAAGATGAACATGAGAACTTCGAGCCATGAGCTTGGATCATTGGCAAAGTAAAGAGTTCACTATACTTTTGAGTATCCACTATGGGTGTTTAATGTTTTTATTGTGTTTTAGATTCAAGAAAACACAAAGTTAAAGGATATGTTAACTATGAAGGGCTTT
GmaAffx.65661.1.S1_at	BI700358		0	No Homology to Known Proteins			TTTGGTTTCTTCAAGTCCTGTTCTTCCTGGCTATGCTTCTCATCAATCCCTCTGTTGCTCCCAATGCACCAGCTCCTCCTTCAAGTGGTGACCCGCATACAGAAACACTCCGGCCACCGCCACGCAAGGTCTCTGGTTCATGGCCATGAAGAATTTATTGATAAGCTTATATATATATAAAGTTTGGTTCTTCAATATATATGTAGTATCTCTTTTCTTCTAAACTTTTNCTGCTTGTGATCACCAGAAATAAGCTATAATAGTCCTACTCTAATGTTTTTGGCNNTATTTGATCTAATTTCTTATTGCGTGTAATATTTAATAATGCCTCCAGTT
GmaAffx.6572.1.S1_s_at	CA786022		0	No Homology to Known Proteins			CAAGGTTACCATTGCTTAAACACTGTTTAGCTGCAGCATATATGTTCTGCTTCTTCTTTTGTTGGTTGTAGTTGAGTTCACCAGTACACTGTAATTTCATTTCCATTTTGTCTGGATTTCAATCTTTTATTTGTAATGAGGAAATATGAGTTCTTATTTTTATANNANNNNNTTTAATGCGTATGAGGTGTTTGTTGAAATGGGTGAAAAGGGGTTTTAAATTACNTGAAATTGAAAATATGCTACTCTTAACTACTTGCTGAACTTGTCAGCATGCA
GmaAffx.65750.1.S1_at	CA935827		0	No Homology to Known Proteins			ATTTCTCTGAATGCTTTCCACTTTGGAAGGNAAAAAACAGTAACTGAAAANTCANGATTTGTCATTTGCTTGAATTCTCTGGGGCCAGANGTTGTTGNGCAGCTGTTTTATTTCATCACTTGTTCTAATTGCTTCTTNTTAGGAGCATGGTTTCTTTCTTCTNTGAGAAAGGNCAATTGTTTTGAGAAAGGAAACTGTTCATTCAAACTCTGGGTTGTGATGGG
GmaAffx.66131.1.A1_at	AI960551		0	No Homology to Known Proteins			CTTGGTTTGGAGTGGAGCATCTAATTTTAGCGTTTTTCTTTGGTCTCGTTCAATAAAATGTGATTGTTTTTAGTAGTCATAAGTTTCATGGTGGGCCAAAGG
GmaAffx.66265.1.S1_at	BM269705		0	No Homology to Known Proteins			GTTTTTCTTTGTTGGGTGTCACTCAATTAGGAAAGTAAAATACAGGATGTGATGATTCTCATAGCATGTTGATAATTTTTATCGTTTAACTGATGAGGGTGTTTTAACACCATTTATTTATGTTGTATTAGTATATTTGAGTTATCTGCTCCATTTGTCCGCGACATGGGACATGGATTTGG
GmaAffx.66400.1.A1_s_at	AW310626		0	No Homology to Known Proteins			AGGTGAGGTTCTTCGTATGTGGCTTATTGGGCTTGAGTCAAACATGTAGATGTAGATTTTATTTGTTGTTTTTTTTGGCTAAGGTTTTGTATTTTTTGGGTAGTGTGTAGGACTCATGGTGAGTCTACATGGAGATGTTGAATTAGGATGTCTCTTGGTTGGATTAATTATGTATTTCGGTTCGATTAACTTGTGTAAAAGATGTGACTTTTTTTTTTTTTTTCCTTTTAGCAAAGTTATATG
GmaAffx.68286.1.S1_at	BG839255		0	No Homology to Known Proteins			GACACAACACAAAACCTCCTTAGACTTGGTGTATTTTGTTTTTCTGTCTGTGTTGTTCCTTCACAACCACAGAGCCAAAAACAAAAACATCTAAAACCTCTTTCTTTCTCTGTGTTTGTGTTTTTAGTTTTTGTTTTTGTCCTATGAAACTCCCAACAACGTTTGCAGACCCGGAATCCTTGTCTTACCTTTACACCTTGCTCCAATCTTCCTTCGACCAAATGAATGATCCCACCAACAACAACACTTCCACCACTGGGAGAAAACGCCGCAGAAAAAACGAGGATGATGATGATGATGATGATGATGGTGATGATGATGGTTCATCCAACAACAACAACAACAACAACAACAANNNGAGGAGCAAGAAGAAGAAGGAAGAGCTAAAGGGTATCCTCA…
GmaAffx.68319.1.S1_at	BG882875		0	No Homology to Known Proteins			TTTAAGCCGTGTTCTCGCCCTATATAAACCACCTTCTCTATCACACGCTTAACGGAACAAGCTAGAGATATTTTTTCACAACCACCTCTTTCAATTCTCTCCTCTCTTATTCCAAATTCAAATTAGAGGAAAAAGGGTCAAATAATAATTAAGTGTAATATGGATACGATCAGTGTTCAGGCGATGAGAAGCTTATCAGATAGTGACTCATTATCATCTGCAACATA
GmaAffx.68418.1.S1_s_at	BI425533		0	No Homology to Known Proteins			GGATGCAGCCTTAGCTGTGAAGTTGTTGCGGTATTTGTTGGAATCGAGACTCATGTTGTTGCTCCAGTTATGTCTTCGTTGGTTAGGACATGCGTTTGAGTTTATTGAGTTTAATTTATAAAATCAGGTTTAGCTTCGCTAGACCATTTTTAAAA
GmaAffx.68432.1.S1_at	BI426680		0	No Homology to Known Proteins			TGGAATTTGAATTTTCTCTTTTGAGGTGACTATTCTAAGCAATTATAAATGTTATGTTGATTTGCCAATGTGGCTTACCTCCAGCTGCTAACTAGTACTGAGTCCTGTATATATGGCCGTTTCATGTATACAATCACTCGTTGAATTGTAACTT
GmaAffx.68687.1.S1_at	BI315574		0	No Homology to Known Proteins			ATATCTTGCAAATCACGCTCTCATTAGTCTCGTCTTTACTAAATGTCCATTATATGAATAAACCACACAAGATTTGCACGCCACGCATGTGTNNGTNNNNNNNNNNNNNNNNNNNNNNNNNNNNNNNNNNNNNNNNNNNNNNNNNNNNNNNACACATACAAACACCTGCTTCACAAACCAGAATGTATTTGAAAAAGAAAAGGCAATTGAAGGAACCAACATTCAAGATTCTGGAACAGAGGCAGCT
GmaAffx.69688.11.A1_s_at	CD413010		0	No Homology to Known Proteins			GTTTCTGTGTTCATAATCGTTTCCGGATAGATTATATCTTGTCACCTCTCCTTCATGAACTAGTTAACGATTTGTGGAGTCGATTACATTGTTTGGTTGGATATTGTTTCTGGTCAGGTTATCCTTGTGTTATGTACCATGTTTAACCTTTGTTTCATCATATAGCTCCAAAGTAACATGTAAACTTTGGTGAATTG
[truncated: 1,739 more rows]
