# Supplementary material for: Microarray Detection Call Methodology as a Means to Identify and Compare Transcripts Expressed within Syncytial Cells from Soybean (Glycine max) Roots Undergoing Resistant and Susceptible Reactions to the Soybean Cyst Nematode (Heterodera glycines)
Source: Hindawi journal article supplement (doi:10.1155/2010/491217), 2010-01-01
Supplement: f11 [file 491217.f11.xls]

## Sheet: Sheet1
Probe Set ID	Representative Public ID	At Gene ID	At BLAST E-value	Functional Category	Subfamily	Gene Family	Sequence
Gma.10796.2.S1_at	CA935397	At5g05170	0	Cell Growth & Division			ATAGAACAACAACTTGCCACTCACCTGTTTCAACCAACAACATAAGCCTCCTGGGAATGTTGTGATTGTCTTCCAATTCTTTTGTTTACAGATTTTGATATTTATTCTTGCTGATTTAAGTTATGTGCAGTTTATGGTCCANNNNNNGAAGAAGAAATCATGTTTAAGTTATGTGCAGTTAATGGTCCATACAGAAGAAATCAAATTAGAATCAAATTATTTAAGGTTGTTTATTTTTTTTGTAATACTATGAACATACCTTCCATTCTTTTGAAGAAGCTGTTTGTCTTATTTAAACTATTCATCAGAAGACCACATCCTTGTATACGTCTTTGTTATATTAACGAGTTTTTCTTCTG
Gma.10862.2.S1_x_at	AW310022	At5g05170	3e-15	Cell Growth & Division			TGGTCCGTTCTTCTTGCTTCAATATTCTCCTTGCTGTGGGTGAGGATTGATCCCTTCACCTCTGACTCCAACAAATTAACCAATGGTCAATGTGGCATCAACTGTTAGTTCTCTTGTATGATTCATTTTGTGTTGTTATTCCCTTTTGCTTGGAGATACACAAGGTTGCTGTCGTGTATATAGCAAGAATTTTCAGCCTATCAAAGTTGTCTGGAGGATTGAACCCCTGAAATAGATGGGAATGTACCCTCTCTGTTTCTATTAT
Gma.2911.1.S1_a_at	BM891517	At5g56950	1e-106	Cell Growth & Division			CCCTTCTCTTATTTTGCGCCTGGTAGAGAGAATGTGGTTATAGGTAGAGATGCTGTGATTTGT
Gma.2911.1.S1_at	BM891517	At5g56950	1e-106	Cell Growth & Division			GCAGCAGTAGATGCAGAAGGTCATTTATGTAGTTGTTGAGTTTTGTTGGTGTTCGAGAATGTTTGATGTGAAAGTGGGTTTCATGTTTTAATGCTTCTTAAGTTGATTTTCCTCACTATATCTTGGTAGTTCGAATTTGTTGAGAGTCCCT
Gma.2911.1.S1_x_at	BM891517	At5g56950	1e-106	Cell Growth & Division			GACAAGATTATTCCCCATGCTGTATCATGGTTTACTGGGGAGGCCATTCAGGGGGANGAGTTTGGAGATCTGGAGGATGACGAGGATGATGAAGATATTGAAGAGGATGATGATGAAGAGGAGGAGGAAGATGAAGATGACGATGATGACGAAGATGATGAGGAAGAAAGCAAGACTAAAAAGAAGTCATCAGCACCTAAGAAGAGTGGAAGAGCACAGCTTGGTGATGGCCAGCAGGGTGAGCGACCTCCAGAGTGCAAGCAGCAGTAGATGCAGAAGGTCATTTATGTAGTTGTTGAGTTTTGTTGGTGTTCGAGAATGTTTGATGTGAAAGTGGGTTTCATGTTTTAATGCTTCTTAAGTTGATTTTCCTCACTATATCTTGGTAGTTCGAATTTG…
Gma.2911.2.S1_a_at	BU926887	At5g56950	1e-15	Cell Growth & Division			GGTGTTCGAGAATGTCCTAATGTGAAAGTGGGTTTCATGTTGTTTTTTAATGTTTCTTAAATTGATTTTCCTCCCTATATCTTGGCAGTCCGAATTTGTTGCGAGTCCCTTCTCTTATTTTGCGCCTGGTAGAGAGAATGTGGTTATAGGTAGAGATGCTGTGATTTGTTTATGCTGGAATTTGTACTGCCATCAGTATACTTGA
Gma.431.1.S1_at	CD390728	At2g29570	1e-126	Cell Growth & Division			GAATACTTCTGTGGACAAGCCTGAAGAAGCNACTGTCATTGAGATGAATGAGCCNGTGTCCTTGACATTTGCTTTGCGATATATGAACTCTTTTACAAAGGCAACGCCATTGTCNAACACAGTTACCATTAGTCTNTCAAATGAGNTGCCAGTTGTNGTNGAGTANAAGATTGCTGAGATGGGTTATGTGCGGTTCTATTTGGCTCCCAAGATAGAAGAGGATGAAGAAGATACGAAACCTCAAGTTTAATCTACCTATTAGNNNNNNNGGTTAGGATATTAGGATTTTAATGTCTTTGAACTTGTAGCTTTCGTCATACATCTTCTGTTGAAGATATTTTAACCGTGTGAGCAATGAATTCACATTTTGTGGATTTCTTAGATGTGTATTGGTTACCT…
Gma.5170.1.A1_at	BQ628737	At5g61210	6e-30	Cell Growth & Division			GAAAGGGTAATCACTTGGAGCAAAGAGAGAAGTTGGGGCTGACTTCTGCACCCAAAGGGCAGTCCAAGCTACGGTCCCCACCTCAAGAACCAACAAATGCATTTGAAAAAGTTGAGGTTGAGAAAAATAAGCAAGATGATGCACTATCAGATTTAAGTGATCTGTTGGGAGAGCTTAAAGGCATGGCTGTTGACATGGGATCCGAGATTGAGAGGCATAACAAAGCCCTGAATCATCTCTATGATGATGTGGATGAGTTGAATTTCCGAGTGATAGGTGCTAACCAACGTGGACGTCGTTTGCTCGGAAAANAAGATTGATTGATTTCATCGTTGTGTTTTTCTCTTTGTATCCATCATCTGGTTTAATGAAGACAATCTTTTCATTTAGTTTACACTT…
Gma.5244.2.S1_at	CD415693	At2g32080	4e-63	Cell Growth & Division			TTGTCTTCGAGTCTGATTTGTGTTATTTTATTTTATTTTCCCTCAGCCTCCTTTCTTCTTCTCATATTGTTCTTCCATTAATGCTTTTGAAATAATGCAAACTCTGGTTGGTCAGCAGAATAATTTGAATTGCTTGGCAAGGTTAATATGAATAGGAATAACGGAAGAAAAAAAGGATCAGAGACTTGTACTTGTTTGGATAGTTTGGCACCCAAGCTACAATCTGTAATAATGTTTGATTGTTTATTTTGCGTTCCTTGCACAGATTTCGCATGGATTTAAGTTCTCATGCCTACCATATGTTAGGTTGGTGACTTAACTATTTTGTAGGGTTTGGTTTCCATCTAACAGCATGAACTT
Gma.5497.1.S1_at	CD414002	At2g27960	9e-39	Cell Growth & Division	Cell Cycle		TCCGAAAATGAGTGGCGGGCAATTGGGGTTCAGCAGAGCCGTGGCTGGGTTCATTATGCAATTCATCGCCCTGAGCCACACATAATGCTCTTCAGGAGGCCTTTGAATTATCAGCAGCAGCAGGAAAACCAGGCCCAGCAAAGCATGCTTGTCAAATGAACACTATCTATGCAAATCTGAAAGTGGGATTACAATGTTATATAGGTTTTAATTTTGTTGGTAATATGGATGTTATGAAGAATGAAGAACCCTGGTGGAATTCTCTTTTTGTGGAGAATTTTCATGTGGTTTCAACTGTCATTTTAATGTGTTGTTGACATGATGATGTGTCATGGATTTTTATTGGTGTACCTCTCGTGTACTCTTATNNGCTCGGTGGATTATATAATAGTCATTATC…
Gma.6820.1.S1_at	AI416867	At1g03860	2e-71	Cell Growth & Division			AAAGGGCTGCTAACTTCAATATTGCCCTTGATGATGTGTCAATTACTAGTCTGACTTTTGGCAAGGAGTTTACTGCTGCAATTGAAGCTAAGCAGGTAGNNGNACAAGAAGCTGAGAGGGCTAAATTTGTTGTGGAAAAAGCTGAGCAAGACAAGAGAAGTGCTGTAATTAGAGCACAGGGAGAAGCAAAAAGTGCCCAACTGATTGGGCAAGCTATTGCCAACAATCCAGCTTTTATCACACTGAGGAAGATAGAAGCCGCAAGGGAGATTGCACATACTATATCAAATGCGGCAAACAAGGTTTACCTGAATTCAGATGATCTATTGTTGAATCTTCAAGAGATGAAATTGGAGCCAGGCAGAAAGTGAGTGTGTTAGCCTGTTTGTTTCTTTTTGG…
Gma.8420.1.S1_at	D50871.1	At2g26760	1e-108	Cell Growth & Division	Cell Cycle		TATCACTTTTTGGTTAGGGATACCAAAGCCTCCACTCCGTCTGACAAAGAGATGGAGAACATGGTGTTTTTCCTTGCTGAACTTGGATTGATGCATTATCCTACTGTAATCTTGTACCGTCCTTCTCTGATTGCTGCTTCTGCTGTGTTTGCGGCTCGATGTACCCTTGGAAGGAGCCCTTTCTGGACAAACACTTTGATGCACTACACAGGCTACTCTGAGGAGCAACTAAGGGATTGCGCCAAAATCATGGCCAACCTTCATGCTGCTGCTGCACCAGGAAGTAAGCTTAGGGCAGTTTACAAGAAATTCTCTAACTCGGATCTTTCTGCTGTTGCTCTTCTTTCTCCAGNNNNGNNNNTNNNAGNANNNNNNNNAGNNAGNNNNNNAGGGGAAGTT…
Gma.9505.1.S1_at	BI786624	At5g63190	1e-105	Cell Growth & Division			TCTTTCAAAATTATGTCACCGACAGATATTCCTATGAATCTCAGTCGTTGTGTAAATTTGGTCTTATATTTCGTTNANAGCTTTTTAGAATGGTGTTGCGTCAAGAGGTATGAGAGGAATATAGTGTATTTTTCAGCCTTAA
GmaAffx.12491.1.S1_at	BE347527	At1g58025	3e-09	Cell Growth & Division			ATAGTCAGTCTGTCTGGAGTGGACCACACTCACTAATACGGAAGACAAATTCTGCTCGGACTAGTTCAATTCACGCTGCTATAAGGACTTTCATGGAGTAGCTTTTTATCTTTATCAGTTCACTACACTTCCTAGCAGCCTATGTCATTAATATTTTAGTTGATGTCCCTTCGTTATTATATGGTGTATTATAGTTCTCAGTTTCTTGATAACAACAGCAGATTTTGTAACAGAAGAATTTGTGCTTCAAACCAGTTCTACTTAAAAAATTATGAAAGNAAAAGTAACCTGCCACTTGCCGTCATAGCTCAAGTGGTCAA
GmaAffx.36227.1.A1_at	BU551398	At3g03050	3e-72	Cell Growth & Division			AGTTTGCTGATCTCTATATTGTGAAATGGACATCCCTTATGATTCCACCTATCACAATTATGATGGTCAACTTAATAGCAATAGCAGTTGGAGTAAGCAGAACCATATACAGTGTCATACCACAGTGGAGCCGTCTACTAGGTGGTGTTTTCTTCAGTTTTTGGGTCTTGGCTCATCTCTATCCCTTTGCAAAAGGTTTGATGGGAAGAAGAGGGAGGACACCTACCATAGTTTTTGTGTGGTCAGGCCTCATAGCAATCACAATTTCTCTCCTCTGGGTGGCTATCAACCCCCCTGCTGGTACTGACCAAATTGG
GmaAffx.54397.1.A1_at	CD410704	At1g63160	4e-88	Cell Growth & Division			GTTTTCAAGGTTTGTGACCAGCCACATCCACTGCATGTGAAGAATATGGTGCGTAATGTGATTGAAGGGAATTTTGATGAAGCTTGTTCAGGCCTCAAGCAACTGTATGACTTGGGATATTCCCCCACAGATATCATCACGACACTCTTTCGTATAATAAAAAATTATGATATGGCCGNNTNNCTGANANTNNNNNNNNTGNAGGAAACTGGTTTTGCTCATATGAGAATTTGTGATGGAGTTGGTTCTTATCTTCAGTTGTGTGGTCTATTGGCTAAGCTTTCTCTAGTTCGTGAGACAGCTAAAGCTGTATGAGCTGGTCCTAAGTGCAACTGAGATGTCATTATTTTTAACTTTTCCGATAGTGAAATGTTCTGCTGATGTAGCCTTATATTTTTT…
GmaAffx.74863.1.S1_s_at	BQ785704	At5g56950	5e-49	Cell Growth & Division			AAAACTCATGTTCTCTCTTGGCAAGAACTAAACTTGGCATACTTTGCATAATAAAGCCACAGGGTAGATTATTCACTAATAAAAAATAAATTTGTGTGTCTTTGTCAACCAAAAATACAAAACTGTATGAATAGGATTTGTTCCAAGTAGATT
GmaAffx.88982.1.A1_s_at	CK605701	At4g24010	2e-24	Cell Growth & Division			CGGACCCTTGGTTTGCAGTGTTTGCATTTGTGTATGTATCTACTCAAATTCAACATTTGATTGAGGTTCTATCTGGGGATGGCTCTGTGGCTATGTGGTGGGATGAACAAAGAATTTGGATTCTGAAGTCAGTTACCAGCATATTTGCAATTATAGATGGAATCAAGAAGTGGCTGGGGTTGAACAAGGTGAAATTCAACTTGTCAAACAAAGCCATTGACAAAGAGAAGCTCAAGAAATATGAGCAAGGTAGGTTCGATTTCCAAGGTGCAGCTGTGTTCATGGCTCCATTGGTCCTATTACTCATAGCCAACATTGTTAGCTTCTTTGTTGGTATATGGAGACTATTCAATTTCAATGTGAAGGATTTTGAAGAAATGTTTGGTCAACTTTTCCTAG…
GmaAffx.89786.1.A1_s_at	CK605840		1.1e-24	Cell Growth & Division			CTCCACGGCCAGCTTCTTAGAGGGACTATGGCCGCTTAGGCCACGGAAGTTTGAGGCAATAACAGGTCTGTGATGCCCTTAGATGTTCTGGGCCGCACGCGCGCTACACTGATGTATTCAACGAGTCTATAGCCTTGGCCGACAGGTCCGGGTAATTTTTGAAATTTCATCGTGATGGGGATAGATCATTGCAATTGTTGGTCTTCAACGAGGAATTCCTA
GmaAffx.89786.1.S1_at	CK605840		1.1e-24	Cell Growth & Division			TCCTTACTATGTCTGGACCTGGTAAGTTTCCCCGTGCTGAGTCAAATTAAGCCGCAGGCTCCACTCCTGGTGGTGCCCTTCCGTCAATTCCTTTAAGTTTCAGCCTTGCGACCATACTCCCCCCGGAACCCAAAGACTTTGATTTCTCATAAGGTGCCAGCGGAGTCCTAAAAGCAACATCCGCTGATCCCTGGTNGGCATCGTTTATGGTTGAGACTAGGACGGTATCTGATCGTCTTCGAGCCCCCAACTTTCGTTCTTGATTAATGAAAACATCCTTGGCAAATGCTTTCGCAGTTGTTCGTCTTTCATAAATCCAAGAATTTCACCTCTGACTATGAAATACGAATGCCCCCGACTGTCCCTGTTAATCATTA
GmaAffx.90437.1.A1_s_at	CF806162	At5g19780	6e-73	Cell Structure			GTATGCCAAGCGTGCTTTTGTCCACTGGTACGTGGGTGAGGGTATGGAAGAAGGTGAATTTTTTGAAGCCCGTGAGGACCTTGCAGCCCTTGAGAAGGATTATGAAGAAGTGGGTGCTGAGTCTGGTGAGGGCCAGGAAGAGGATGAAGACTACTAGAATCTACTTCAGATTCTTGTTCTTGTGGTCTGTTTTCTGTTGTGTTTGATGTTCAGATGTGTACCAGTACCGATGTGGTTTTAATTTGGATGCATTGCTTTTATGCTTCGCTGCTCCTGTTACGTACCTAAACTGAA
GmaAffx.91087.1.S1_s_at	CF806812	At4g11050	1e-22	Cell Structure			AGTCTCAATTCTCTCAATCTTTCAATATCCAAGCTTTATGGTCCAATCTGGGGTGTCACAAAGTCAGGTGATTCATACACATTCCCATCATGGCTCAGCTCATTATCAGCTGGCAAAAGCCTTGAATTTGTCTACATCCATTCTGCTTCTCCAGCAGATGTCTCCGTGGCGAACTACGTGTTGGCCTGAAAGTGGCATGGGAATGGTTTACTGCTTTCTTGTGTAAGACTGTGTAGCCATACAAATGTGCAGCGAGGGGAGTGTCTTTACGTTTTTCCTTCTATAATTTGGTGTCAAATCTTCTTCTTCTTCTTCCCTTGTGTATTTTGCATTTCAGTAGGTTAGATCAAAATAGGTAGATTATATAAGATGGAAGGACCGGAGCAGAAAGGAGTGAAG…
GmaAffx.92828.1.S1_at	CF808553	At1g11580	2e-92	Cell Structure			ATAAACCGCTGTCGCATTGATGCCTTCCAAGACACTCTCTACGCTCACTCCAACAGGCAGTTCTACCGAGACTCTTTTATTACTGGCACTGTTGACTTTATATTTGGAAATGCAGCTGTTGTTTTCCAAAAGTGCGACTTGGTGGCCCGAAAGCCCATGGATAAACAGAACAACATGGTCACTGCCCAAGGACGAGAAGATCCAAACCAGAACACAGGAACTTCAATTCAACAATGTAACCTAACACCAAGTTCGGATCTTAAGCCTGTCGTGGGCTCCATCAAAACTTTTCTAGGGCGCCCATGGAAGAAGTACTCCAGAACTGTTGTGATGCAGTCGACATTGGACAGCCACATTGACCCAACAGGATGGGCTGAATGGGATGCCCAAAGTAAAGAC…
GmaAffx.93161.1.S1_s_at	CF808886	At5g09810	1e-86	Cell Structure			GCTGAGGACATTCAACCTCTTGTTGTTGATAATGGAACTGGAATGGTCAAGGCGGGTTTTGCAGGTGATGACGCTCCTAGGGCCGTGTTCCCCAGTATTATTGGGCGACCACGCCATACCGGTGTAATGGTTGGGATGGGTCAGAAGGATGCTTACGTGGGTGATGAAGCTCAATCAAAAAGGGGTATACTCACCTTGAAGTATCCTATAGAGCATGGCATAGTCAGCAACTGGGATGATATGGAGAAGATTTGGCATCACACATTTTACAATGAGCTTCGTGTTGCCCCTGAAGAACACCCTGTACTTCTTACCGAGGCACCCCTCAATCCCAAGGCCAACAGAGAGAAGATGACCCAAATTATGTTTGAGACTTTCAATGTGCCTGCCATGTATGTT…
GmaAffx.85041.1.S1_at	AI938331	At5g59910	1e-42	Cell Structure	Histone		GTACACCCTGACATCGGTATTTCTAGCAAGGCCATGGGGATCATGAACAGCTTCATCAACGACATCTTCGAGAAGCTCGCGCAGGAAGCGGCGCGTCTCGCCAGGTACAACAAGAAGCCTACTATTACCTCCAGGGAGATTCAGACCGCGGTCAGGTTGGTGCTGCCCGGGGAGCTTGCCAAGCACGCCGTTTCTGAAGGAACCAAAGCCGTTACCAAGTTCACTAGCTCTTAGAGTTAGGGTTTTTTTTTTTTTTTTTTTTTTNCTGTAAAGCTAAGTCGTATAGCTAGTGGCTTCTTTTCGGATTCTATATGCCTATGAATTTGTGATTCTATTAGTCCC
GmaAffx.2378.1.S1_at	BG652106	At3g54560	2e-30	Cell Structure	Histone		TAGTGTTAGTAAGTGTAGTAGGCCTTTGCTACTGTTTAAGAACAGATGTTGATGTTATTGTGTAAATGGTCATTCTATTGGCTTTTAACTTGCCTGTTGTGATACTCCTGGAATTGTAACGCTGTTGGATTTTA
Gma.9025.1.S1_at	BQ612940	At2g05630	1e-57	Cell Structure			GAAATAATCCGTGACTGGTAACCATCTGAATAGTACTTCCTAAAATTGACCAATGTGAAGAAGTCAGCTTAATTGTAAATTCTCTGGTTTGATGCTTTTATGTAAAGTTTATTATGTCTANTGNAACTTATTTGAAAATTGTCGTGTTTCTATCAGTTCTAAATTGCATAAGTTTAAGGGTATGTTCTTTGTTCACACCGTTGATCCCTGACCTGCATGTCCGATTGGTGTCATACAATTTGTAGTTTACA
Gma.9164.1.S1_at	CA802402	At5g59970	6e-40	Cell Structure			TTTTCCTCCCAAAATGTCAGGCCGTGGAAAAGGTGGGAAGGGTTTGGGAAAGGGAGGAGCTAAGAGGCACAGAAAGGTTCTTCNTGACAACATTCAAGGAATCACGAAACCTGCGATTCGTAGGTTAGCGAGAAGAGGTGGCGTGAAGAGGATCAGTGGTTTGATTTACGAGGAAACCAGAGGAGTTCTGAAGATATTCTTGGAGAACGTGATTCGCGATGCTGTAACCTACACTGAGCACGCTAGGAGGAAAACTGTTACTGCTATGGATGTCGTTTATGCTCTCAAGAGACAGGGAAGGACCCTCTATGGCTTTGGAGGCTAAAGAATAGAATCTTTAGGTTTAATGACTGTGTTGCAGGATNAAACATTGGTTCTTTTGAATTTGCGTGAAGTTTA…
Gma.7369.1.S1_s_at	CD399383	At5g59910	1e-41	Cell Structure	Histone		TTCACCCCGACATTGGTATTTCCAGCAAGGCCATGGGCATCATGAACAGCTTCATCAACGACATCTTCGAGAAGCTCGCCCAGGAAGCGTCGCGTTTGGCTCGCTACAACAAGAAGCCCACCATCACCTCGAGGGAGATCCAGACCGCCGTGCGTCTCGTGCTCCCTGGTGAATTGGCCAAACACGCCGTTTCTGAAGGGACCAAGGCGGTTACCAAGTTTACCAGCTCTTGAATTAGGGTTTGTTAGGCGGTTGTGTTGCAGATCTAGGGTTTTC
Gma.79.2.S1_at	AW310410	At4g13340	6e-05	Cell Structure			TTGTTTATAGTGCTATGGCCACGACAAGAGTGTT
Gma.5833.2.S1_s_at	BE801610	At2g18050	2e-25	Cell Structure	Histone		TGTGCCTTGCTGCACAATCTTGAAGAAAGTTGTGTAGTGTAGGATGGTAGATAGTTTAGT
Gma.6150.2.S1_s_at	CD416056	At5g59880	6e-60	Cell Structure			TGCAAGCAACTGATCCTACTGAGATGGGTCTTGATGTGTTCAAAAGCCG
Gma.6283.1.A1_at	CD397881	At5g65360	1e-70	Cell Structure	Histone		GAAGCAACTCGCCACGAAAGCAGCACGCAAGTCCGCTCCGGCGACCGGCGGCGTGAAGAAGCCACACCGTTTCAGGCCGGGTACGGTGGCGCTGAGGGAGATCCGAAAATACCAGAAGAGCACCGAGCTTCTCATAAGGAAGCTTCCTTTCCAGAGACTCGTAAGGGAAATCGCTCAGGACTTCAAGACCGATCTCCGCTTCCAGAGCAGCGCTGTCTCCGCTCTGCAGGAAGCCGCGGAGGCCTACCTTGTTGGGCTGTTCGAGGACACCAACCTCTGCGCCATTCACGCCAAGAGAGTTACCATTATGCCCAAGGACATTCAGCTTGCTCGTAGGATTAGGGGCGAGAGGGCTTAGGGTTTGTTCGTGTGATGTACAAAGCTGTAGTACTTTCTTAG…
Gma.5502.1.S1_at	CD417859	At5g44340	0	Cell Structure			GTCCAGCGTGTGTGATATCCCACCTAAGGGTCTTAAAATGGCATCCACTTTTATTGGTAACTCGACNTCAATCCAGGAGATGTTCAGGAGAGTNAGTGAGCAGTTCACGGCNATGTTCAGGCGCAAGGCTTTCTTGCACTGGTACACCGGGGAAGGAATGGANGAAATGGAATTCACCGAGGCNGAGAGTAACATGAACGATCTTGTTGCTGAGTATCAGC
Gma.5323.1.A1_s_at	CD402653	At5g59970	1e-37	Cell Structure			ACGGATTTGGCGGTTAGACAATTGGGGATTTCNGCACTGCGTCCTCGATTAGNGTTTCTTATAGTGTCAATTTCGATGTTTATATCCTGCAATAGTTCTTTAGCTGTAGCTTGAGGTTTAGCAACTGCTCTTGTTTCGCTTTGGGTTGTAGCTATGAGA
Gma.5675.1.S1_a_at	BE822313	At5g07840	1e-61	Cell Structure			TCAGTGATAGCAGATTTAACCCACCGCTTCATTACTGTCCCGGGCTGGAATGGGCCTACGAGGAGATGAAGCGACTTCGTCAAGAAGATTTGTCTGCTGGAGAGACATCTTACAGCTCCGAAAGTTAATTTGCTTTTCAGGGACTTGGTTGGTGTTTGATAGTGTGTGTTTGGATGCCGTTCAGAGGAGATCAATGTGTGTCAGATCAGAGTTAATATGACTAGCTTCTGCGTCACCTTTATAAATTTGACATGAAAATTTGTTGATATGTGCATTCAGAAAGCGTATCCAGACATGCA
Gma.5683.2.S1_at	CA935387	At1g11840	1e-139	Cell Structure			TGTCACTGAATACACCAAGGGAAATGCTTATGCACAGGTTGCTATTGGTACTGATGATGTATACAAGAGTGCTGAGGTTGTCAACATAGTCACACAAGAGCTTGGAGGGAAGATTACTCGGCAACCAGGACCANTTCCTGGCCTTAACACAAAGATCACTGCTTTCTTAGATCCTGATGGATGGAAAACTGTTTTGGTTGACAATCAAGATTTTCTGAAGGAGCTGGAGTAAAGAGTTATGGCTTTTTAATTTAAAGTACTAGTGCTATTGTATGAATAAGTGATCAGCTCCTGTATTTATCAGTGAAGTAGTAGTGTTCAATACGGTTTCTCTGATGTGTTTGCCTGTTTGGTTGAGATTCTAGACAGTCTAC
Gma.5785.1.S1_at	BI943300	At1g64390	0	Cell Structure			CTCAATATTTCAGAGAAGAGTCATCNCTTGTATTTTTCAACAGCTTTGGATGTCTTTTCTGTGTTTGATGTTGTAAGCTTTGCAGCATTTTGTANTCTCTACAGAGAAACAGTTTGTGCTATATAGTATTATGTTTTTGTGCTGTGCAA
Gma.3064.1.S1_at	CD403129	At5g65360	1e-70	Cell Structure	Histone		AATCCCGTTGTATTTTTCTCAGATGGCTCGAACGAAGCAAACGGCCCGCAAGTCCACCGGCGGCAAGGCGCCGCGGAAGCAGCTGGCGACTAAGGCGGCTCGCAAGTCGGCTCCGGCGACCGGCGGCGTGAAGAAGCCGCACAGATTCAGGCCGGGAACCGTGGCGCTGCGCGAGATCCGGAAGTATCAGAAGAGCACGGAGCTACTCATCCGGAAGCTTCCGTTCCAGCGCTTGGTCCGCGAGATCGCGCAGGACTTCAAGACCGACCTCCGGTTCCAGAGCTCCGCCGTCTCCGCGCTCCAGGAGGCCGCCGAGGCTTACTTGGTCGGTCTCTTCGAAGACACGAACCTCTGCGCCATTCATGCCAAGCGTGTTACTATCATGCCCAAGGACATTCA…
Gma.2240.1.S1_at	AW311147	At5g13870	1e-142	Cell Structure			TCACATCGACGGGTGCGAGGCTTCGGTGAACGCCAAGTTCTGCGACACGCAGGGCAAGAGGTGGTGGGACCAGCCTGAGTTCCGTGACCTTGACGCCGCCCAGTGGCGTAGGCTCAGATGGGTGCGCCAGAAATACACCATCTACAACTACTGCACTGACACTAAACGCTATCCTCATATCTCTCCTCCTGAGTGCAAAAGAGACCGTGACATTTAAATTTCGAGTGAATAGATATTTTAGTCCGTGATATTTAAATTTCTCATTCACTTTATTATTGTTGCTTCTCTTTTCATTTTTATCACCCTGCCACACATTCACATTTCCACTTCCTATGTACAA
Gma.2245.1.S1_at	CD391149	At3g55430	1e-144	Cell Structure			AGGCAGATGCTAGCAACCAAGCTTTGCAAGCAAACATAAACTATGTGTGCAGCCAAGGAGTTGATTGTAGGCCAATTCAACCAGGAGGAGATTGCTTTGCAGCCAACAACGTTAAGGCTCTTGCCACTTATGCCATGAATGCCTACTACCAGGCCAATGGGCGCCATGATTTCAACTGTGACTTCTCTCAAACTGGTGTTATTACTACTACTAATCCAAGCCATGATAAATGCAAAATCTGAGCATGTTTATTTAAAGGTTATAATCAGAGGCAAGAAAGGAAGATAGAGAAAAGCCCATTGTCATGGTGTCAATGTGGCTTAGTGGTATCTGTGACTCTGAGATTATGCATTCATGTACTCAAAATTATTTAGTTTGTATATTGTTCTGGAAGAAGAA…
Gma.2338.1.S1_s_at	CD409383	At5g10980	3e-71	Cell Structure	Histone		GTTAGAATGCTTCTGTTTTAGTTTTTACCTGCGGGATGTTGCAGCCACTTTAGAAACTGTATTGGACAAC
Gma.2338.3.S1_at	BI426604	At5g10980	5e-66	Cell Structure	Histone		GATTCGCGGTGAACGTGCTTGAGGTGGTGGTTGTGAAGATGAAGATGAAGATGGGTTGCTGCGGGTGGTGTTTTTGTTGTTCAGATTCCTTTTTTTTTTTTTTTNNCAATGGATAGGGTTGTTAGGGAGTGTAGGTGTTTTACGGTATTACCCATTAATTGTGATACAGGCAAATACTGCCAAGTGTCCGTGACTGTGTTTTCTTCCTTTTAGAAAATTGGCTTGTAATTGATTTTTGGACATGTGTGTCATAATGTTTCTGTTTTTAGTTTTTACCTACGGGATGTAGTCACTTTGGAATTGTATTGGACAACATTCAGTTGCCATCTAATCTCGTTTAAGCTAAGTTTGTTGTGCTAATTAA
Gma.2464.1.S1_at	BG839541	At5g15650	0	Cell Structure			AATGGCAAAGCGTGAATCGGTTTTTGGTTAACTGCATAACAGCCACANAACTTGGAANTGGAACTATTTATATACTGTATTTTTTTTCCTTAGTATTTATCTTCAACTTAGCTGTTATTCTCGGCTTAAAATTTGCAGCATTGTTAGCTGTAATTCTGTTTAATAACTTCATCATTTGAGCTTAGAAACAATAAGTACACCCGTAGGGCGTTACTTTCTTTTTATTATTGTTTGATGGGTAGAGATCACATGGCAGCATTTCGTTACATGTGAAATAATAGAAAGGTTATTGATGTATGTCTTGT
Gma.2470.1.S1_s_at	AI442629	At1g09560	3e-63	Cell Structure			AAAGTCTGGCTTTTGGTCCTTTGATTCCCAACTTCACTTGTCACATATCATATTATGAAGCTCACAGGTTTCCTGCAAGCGGTGACTCTTGCTTTGGTGTTAGCCACCGTCTCTGCATCAGATCCTGATCCTCTTCAAGACCTCTGTGTCGCAGACCTTGCTTCAGCGGTTAAAGTGAATGGATTCACATGCAAAGATGCTGCCAAGGTAAATGCGAGTGATTTCTTCTCAGACATACTAGCCAAACCAGGTGCCACAAACAACACCTATGGCTCCCTAGTGACTGGAGCCAACGTTCAGAAAATCCCAGGACTCAACACCCTTGGCGTGTCTTTATCACGCATTGACTATGCCCCAGGTGGCATCAACCCACCTCACACGCACCCACGTGCCACCGAG…
Gma.4001.1.S1_at	BI424053	At1g05570	1e-117	Cell Structure			TTGTCATTTTGATTGCTCTTCCGCATATGACAGTGCAGGACATTGTTGTTTGCATTCTTGCTTTCATGCCAACTGGTTGGGGAATGCTGCAGATTGCTCAAGCATTAAAACCTGTAGTACGCCGGGCTGGGTTTTGGGGATCAGTGAAAACTCTTGCTCGAGGTTATGAGATTGTCATGGGTTTGCTATTGTTCACTCCTGTTGCTTTTCTGGCTTGGTTTCCATTTGTTTCAGAATTTCAAACCCGTATGCTGTTCAACCAAGCATTCAGCAGAGGTTTGCAAATTTCTCGTATTCTTGGTGGCCAAAGGAAGGAACGCTCTTCTCGCAACAAAGAATAGGTTGTNTAACTCTGAAGGNTTNNAATTATTAGGAGNCCNAAATTCTTGGTTGCCNTAA…
Gma.17692.1.S1_at	CD393918	At1g52740	9e-57	Cell Structure	Histone		GATTACTGGTGAATGATAGCAGCTTGATGGAAAATTTCTCTACTAATTGTGTATTTGTTGCATGACACTTGAAAAACACAGTAGGGCCTTCTTCTATTTATGACTGAGTTGCTGCTGTTGATCATGGATATAATATTTAGTGTTTCTCTTTGTTAATTTAGTATGTCNNNTATCACTGAAAATCTTAATTGAGGATAATTCAATCTGATGGCATTGTATTCA
Gma.17868.2.A1_s_at	BQ253153	At5g62700	3e-36	Cell Structure			AACGATCTTGTGTCAGAGTATCAACAGTACCAGGATGCCACTGCTGATGAGGATGAGTATGAGGAGGAAGAGGAGGAGGAGGAGTATGGCCAACATGATATGTGATTTTGAACTTGGTAATGTATTGCGGTGGCTTGAAGATGTATAACATGCCGCAACTTCCTGTTGCCGGTTGATTGTCTCTTTTGAGGGGATGGTTCTGTTCCGGCTAGATCTAGTTTCCATTACTGTTCTATAAAACTGGTTCTGTTTGTTTCCGTTTTTATGTAACCTGTTGTTTGTAGGGAAGA
Gma.1913.1.S1_at	BI970928	At3g12110	0	Cell Structure			GAGGAACAACCATGTTCCCTGGTATTGCTGACAGAATGAGCAAGGAAATTTCNGCATTGGCACCCAGCAGCATGAAGATCAAGGTTGTAGCACCACCTGAGAGAAAATACAGTGTCTGGATCGGTGGTTCTATCTTGGCATCTCTTAGCACCTTCCAGCAGATGTGGATTGCAAAGGCAGAATATGACGAATCTGGTCCATCAATTGTGCACAGAAAGTGCTTCTAAACTGTTTCGATAGATAGGGTTATTGAAGGGAAAGACTACTATCATCACGATTTGTCTGGAAGCAATGCATTGCAGATTGTAACCCTTTGATTCTAGCTTTTGTTATCCTTTCATTTTATTCTCTTGTTGGAGTGATCATTTATTTGCAGAAGGTG
Gma.1975.1.S1_s_at	CD418592	At1g07790	2e-46	Cell Structure	Histone		CACTAGCTCTTGAACTGACTATTATGCCCCTTCGCTTCGATCTAGGTGTCTCTGTTAGGAATATGTTTTATGTTGAAGTGTTGGTTTATTTTTTCTTTTTGGTGAAAGCAATTTGTAAGTGAAGAATATGGGATTTGTTGATCCTTCTTTGTATGGAATTAGTTGCTAATACAGAGACG
Gma.1975.4.S1_at	CD403154	At1g07790	1e-46	Cell Structure	Histone		GAACAAAATATCTTTGCCTGGCTCTTGTTTTTCTTCATGTGTTTCTGTTAGATCTAGCGACCTATGCTTAGATTTGAACAGTTAACTT
Gma.1975.4.S1_x_at	CD403154	At1g07790	1e-46	Cell Structure	Histone		ATCGTGATGGCACCAAAGGCAGAGAAGAAGCCAGCAGAGAAGAAGCCCGCGGAGGAGAAGAAATCGACGGTGGGAGACAAGGCTCCGGCGGAGAAGAAGCCAAAGGCCGGAAAGAAGCTTCCGAAGGAGGGAGGCGCCGGCGGAGAAGGGAAGAAGAAGAAGAGAAACAAGAAGAGCGTGGAGACATACAAGATCTACATCTTCAAGGTTCTGAAGCAGGTTCACCCTGACATTGGTATCTCAAGCAAGGCCATGGGAATCATGAACAGCTTCATCAACGACATCTTCGAGAAGCTTGCCCAGGAATCTTCTAGACTTGCCCGCTACAACAAGAAACCCACCATCACTTCNAGGGAAATTCAGACCGCGGTCAGGCTTGTGCTGCCCGGTGAATTGGCC…
Gma.2190.1.S1_a_at	CD390492	At3g02230	0	Cell Structure			GCTTGGGAGTGAAGACTGGCCTTCCATACATCTGGCACAGCAAAGCAAGCAACCCTTTTGTCAATCTCAAAAAGGAGTACAAGGGCATCTTCTGGCAAGAAGAAATCATTCCATTCTTCCAAAGTGCCACTCTTTCAAAAGAGTGCACGTCTGTCCAAAAATGTTACATTGAACTCTCCAAGCAAGTCAAGGAGAAGCTTGGGGCTGTTGATCCCTACT
Gma.2190.2.S1_x_at	BG550828	At3g02230	0	Cell Structure			TTGGGAGTGAAGACTGGCCTTCCATACATCTGGCACAGCAAAGCAAGCAATCCTTTTGTGAATCTCAAAAAGGAGTACAAGGGCATTTTCTGGCAAGAAGAGATCATTCCATTCTTCCAAAGTGCCACCATTCCAAAAGAATGCACTTCTGTCCAAAAATGCTACATTGAACTCTCCAAGCAAGTCAAAGAGAAGCTTGGGGCTGTTGATCCCTACTTCACCAAGCTTGCAGATGCCATGGTGACTTGGATTGAAGCTTGGGATGAGCTTAACAGCACCACATCCGAAGAAGCTTCTT
Gma.10775.2.S1_s_at	AI759701	At1g26770	6e-41	Cell Structure			AGCTGGTGATGTGAATTCAGTGTCCATCAAAGGGTCCAAAACTGGGTGGCAACCCATGTCAAGGAATTGGGGGCAAAATTGGCAGAGCAACTCATACCTCAATGGACAATCCCTCTCTTTTCAAGTCACCACCAGTGATGGTAGAACTGTGACAAGCTTCAACGTGGCACCAGCCAATTGGCAATTTGGCCAGACCTTCCAAGGAGGCCAATACTAGAGACATTATTGCAAATTTACAATGGGGGGTANAAAATAGTGCAACAAAAAAAAANNTGTTTGTATACCTATTATTAATCACCTCATTGGAAGAACCATTAAAAGTGTCATTAATAGGTATTGATTCTTGTAACTGTGATTCTGAAAGGCCAGTGTTTTTTATTT
Gma.10479.1.S1_at	CD414847	At1g52740	3e-60	Cell Structure	Histone		AACAAATCTTCGAAGGAATGAGGAAGGTTTATAACTTATAAGTTATTTGAATCNAAGATGAAAATCNCTGTAAATTTAATTATATCTTTTACCTGTGGATAATTTGCCCCTTGCATTATTAGTTTGGTTGAACTAGAACCATCCTTCAAAAGAAATCTGAAAATTTCTGATTTCTTCANNNNAANNNNNNNAANNNANNNNNNNANNNNNNNNNNANNNNANTGNANNTTAGATGATACTGCCTGTCTGTCTAGTCTTTATTGTGGAAG
Gma.10707.1.S1_at	BI967315	At5g02560	1e-40	Cell Structure	Histone		ATCTCCTAAGAAGGCCTAGATTATCCTTTTTTTTTTTTTTTTTNNAAATNTAGTGTTGTATATCGGTGCTTAGATGCTTTTGGTGTAACAGGAAATTTGATGTGTTTCTTAAACATTGTAATTCTTGTCCC
Gma.10707.4.S1_at	AW309587	At5g02560	2e-42	Cell Structure	Histone		TAAATCTCCTAAAAAGTCTTAACTGACTTAGTTTATTGTTTCTCTATTTAGTGTGCACAAAATGTAAATCTGTGTTTAGGTTCCTTCTTGTATCACCATTATTTGTAGTTCTCAAGTCGCTGTTTCTTTTTCACATTTTCATTCAATCTGTTGAGACAGCAAGCTCTCAGTAATGGATTGATTT
Gma.10723.1.S1_at	BI700359	At5g48160	0	Cell Structure			CAGAGGCTGATATGTTCCAATTGAAGGCTGATGAGGCTAAACGAGAGGCCGAGAGGCTTCAAATGATTGCTCTTGCCAAGCAAGATAAATCAGAGGAAGAATTTACTAGCAACTACTTGAAACAACGATTAAACGAGGCTGAGGCCGAGAAGCAGTACCTTTATGAAAAGATCAAATTGCAGGAGAGTTCTCGCGCTTCGCAGGGCAGTAGTGGTGGTGACCCCTCTCAGATGCTGATGTATTCCAAAATTCACGATCTGCTTTACAGTGTTCCTTCCAAAGCAGACAGTCAGGGTAATGAGCGCCACCCTTTTCGGACAAATCCCTGAGAGTCCATTGTGTTTGTAATGCCAANTTATGTTAGCTGTTGTAGCTAAGTCACCTTTGA
Gma.11070.1.A1_at	CD412352	At5g59970	1e-40	Cell Structure			GAAAGTTCTTCGCGATAACATTCAGGGTATCACGAAACCTGCGATTCGTAGGTTAGCGAGAAGAGGTGGTGTGAAGAGAATCAGTGGTTTGATCTACGAGGAAACCAGGGGGGTTCTGAAGATTTTCTTGGAGAACGTGATTCGAGATGCTGTGACCTACACCGAGCACGCTAGGAGGAAGACGGTGACTGCCATGGATGTGGTTTATGCGCTCAAGAGGCAGGGAAGGACCCTCTACGGTTTTGGAGGCTAAAGAATTTAACCCTTCTTTTCTGGGTTGCAGGATAAGACATTGGTTCTTTTGAATTTGCGTGGTGTTTTAGTTTAGGTTTGTTATGTATCATACGAATCTCTGGTTTGCATAGAAAATATTTCATTTGAAATTTAAATGGAGTATCG…
Gma.11070.2.S1_s_at	CD393765	At5g59970	1e-40	Cell Structure			CTGTTCTTCTGAAATTCGGTGTGATGTTTAGTTTAGATTCGTTCTGTAACATATGAATCTTCAAAGGTTCTGTTCGGCACAGAAAATGTACTACTTTAATTGAAATTAAAATGAAGGAGCAGCGTTTTCGTGG
Gma.11213.1.S1_s_at	CD394730	At5g10980	4e-71	Cell Structure	Histone		AACGTGCTTAGGCTAATAATAAGAGTAATAACGTAGTTGCTGCTGCTTTTTTTNCGTTTTGCAATACATTTCTTGTTTTAGGGTTATTTTTAGTGTTATGTTCCGGTTTGTCTGTTATGGGATGTATAGAAGATAGATATATCNATCAACNACTTAGCATTTGTAATGATCCTAAACTGAAATATTT
Gma.12446.1.A1_at	CD411372	At5g59970	9e-37	Cell Structure			TCGCAGAGGTGGTGTTAAGAGAATCAGTGGTCTCATCTACGAGGAGACACGTGGCGTCCTCAAGATNTTCCTCGAGAACGTTATTCGCGACGCTGTTACCTACACCGAGCACGCTAGAAGAAAGACCGTTACCGCTATGGATGTTGTTTATGCTCTCAAGAGGCAGGGCAGGACTCTCTACGGTTTCGGTGGTTAATTTCTAGGGTTTCCATCGGCGTAGCAGCTGCTTATTGGTTATTGTTGTAAATGGTTGCTTTTTAGGCTTCTTGTTATATTTGCTTCAATTGTAATGGAACNNAAGAGTATTTTGTTTCTGGTATTTGAATCTTAATGGTTGAAGTTCTCTTAATTGTCATGGTTACTCTGATTATCTGCTAGTTAATTGCG
Gma.12995.1.S1_at	BU763539	At5g59970	5e-37	Cell Structure			GCGACAATATCCAGGGAATCACGAAGCCCGCGATTCGGAGACTGGCGAGAAGAGGTGGCGTGAAGAGAATCAGTGGTTTGATCTACGAAGAGACCAGGGGCGTGCTCAAGATCTTTCTCGAGAACGTGATTCGCGATGCCGTGACGTACACGGAGCACGCTAGGAGNAAGACAGTGACGGCCATGGATGTCGTTTACGCTCTCAAGAGGCAGGGAAGGACTCTCTATGGTTTCGGAGGCTGAGGGTTTGGCCTTCTTTGGTGGCTTTGGTTTGTGTAAATGGAAGGAATTTGTGTTTTGTAGTGATTATATATGTACTTGGATTATCTTCTGCTCGGTACATGCTCAAGGTTCTTCTGTTTTTTTTTTTTNAATTCTACTAGTAATTGCATCCTAATTG…
Gma.13580.1.S1_s_at	BQ611050	At5g19780	0	Cell Structure			CAATGTAATTGTTTCGAGTAAAAAGGGTATATGCTTCGTTACATTACCCTGAACCAGTATTGTTCGTTCCTTTTTGTTTTTACTCCTGTGTGATATAGTTCTCCATTATTCAAACTGTGAAGTGATATCATCATTATGCTTCTATTTTGGTGGTTTAGGACCTGTTGTTTGCGACCTCTGTCATGTTTTCAGAATTGTCCAT
Gma.14873.1.S1_at	CD487575	At5g59970	2e-40	Cell Structure			ATTCAGGGCATAACGAAGCCCGCAATTCGCCGTCTCGCGAGACGTGGCGGCGTGAAGCGTATCAGTGGTCTCATCTACGAAGAAACCCGCGGTGTTCTCAAGATCTTCCTCGAGAACGTCATTCGCGACGCTGTCACCTACACTGAGCACGCTCGCCGCAAGACCGTCACTGCCATGGACGTTGTTTACGCCCTCAAGAGGCAGGGCAGGACCCTCTACGGTTTCGGCGGTTAGAGAATTACCGATTTCTGCATTGCGTCGTGGATTAGGGTTTCTTATAGTGTCAGTCAATTTCGCTGTTGATATTATGCAACGGTTCTTTAGCTGTAGCTTGAGATTTAACGATTGTTCTTTGAGTCGTAGTTATG
Gma.15752.1.S1_at	BE610171	At5g59970	1e-37	Cell Structure			TGCTAGGAGGAAGACTGTTACCGCTATGGATGTTGTTTATGCTCTCAAGAGGCAGGGCAGGACTCTCTATGGTTTCGGTGGTTAAATTTTAGGGTTTTGATGGGCTTAGCAGCTGGTTATTTTTGTAAATGGTCGTTTGTTTGGGAGTATTTGATTTTGTGCTTTTTTGTTTTTTAGCCTTTCTTGTTAGGTGTATTGTTATTTTTGCTTCAATTGAAATGGAACAAAGAGTGTTTTGTTTCTGGAATTCTCTTCTTGTTGAAGGTGTACACTGATTACCCGCTAGTTAATTGCGACTTTGGAGATAAANNNNNNNNNNNNNNNNNNNNNNNNNNNNNNNNNNNNNNNNNNNNNNNNNNNNNNNNTTTGCAGCTTTTGTGATCGTTATTGCGTCTGTTC…
Gma.15760.1.S1_at	BE823195	At5g65360	1e-70	Cell Structure	Histone		GGGCTCTTTGAGGATACCAACCTCTGCGCTATTCATGCTAAGAGGGTTACCATTATGCCCAAGGACATTCAGCTAGCTCGTAGGATTAGGGGCGAGAGAGCTTAGGGTTTATGATTTACAAAGCCGTAGTGTTTTCTAAGGGTTATTATTTTGCAATCGATTCCTTCAGCTTAGTATTAGGGTGAAAGTCCTTGTTTTATTGTGACTGTATTGGAAACTCGTTTCTGTAATGTGAGAAATATTAATGTTGAGCCCT
Gma.15877.1.S1_at	BU760936	At5g55850	2e-27	Disease & Defense			GTTCACAGTGATTTTTAATAAGGCCAGGGATGAGAAAAAGACAGGTGGNAACCCAGANTCACCAGGAAAGACTGCNACTGATCCTCATAGCAAACCTGCNGTAGAGCCTGGCAAAACTCANACTAAAAAATGGTTTTGCTGCATGCAAAACCCTTCTGCCGAATCATAGCATAGCAATGGTTGCTCCTGTGAAAAGCCTGAACAGAAGAACAATGTTTNNGTGTAACTAGNGTCACAGTATTTTCTCNAAGATAAGAGCTGTAGAGNCATAAGCGAATTCTACGGAATTTNTATTNTGTGNTGTAAAAGTGAGCTGCAATGGGGGAAAGAAAAGAAGACAGACTATTATTTATGTGTGTGTATCAATGTTGTGGTTTATTATTAGGAGCCAGGGTTGCT…
Gma.15938.1.S1_s_at	CD405157	At5g41010	2e-21	Disease & Defense			AGCGATGGATCCTCAGCCTGAGCCAGTNAGCTACATNTGCGGAGATTGTGGAATGGAGAATACGCTGAAGCCNGGTGACGTTATACAGTGCCGTGAGTGCGGTTACCGTATNCTTTACAAGAAGCGCACTCGTCGCATTGTCCANTACGAGGCACGCTGAAGAAAACTGCT
Gma.15464.1.S1_a_at	AW101841	At1g08830	1e-64	Disease & Defense			GAGAATCGTCATGCTGGTGATCTTGGGAATGTTAATGTCGGTGATGATGGTAC
Gma.15464.1.S1_x_at	AW101841	At1g08830	1e-64	Disease & Defense			GTGCCCCTGAGGATGAGAATCGTCATGCTGGTGATCTTGGGAATGTTAATGTCGGTGATGATGGTACTGTCAGCTTCACTATTACTGACAGCCAGATTCCTCTCACTGGACCAAACAACATCATAGGAAGGGCGGTTGTTGTCCATGCTGATCCTGATGATCTTGGGAAAGGTGGTCATGAGCTTAGCNAAACTACTGGAAATGCTGGTGGCAGAGTAGCTTGTGGTATCATTGGTCTGCA
Gma.15307.1.S1_at	U64866.1	At5g25610	2e-27	Disease & Defense			GAATCATCAAATGCTTCATCAACTTATGGGAGTTGATCCTGGAACTAACCCTGTTTGCCATTTCCTTGGAAGCAAGGCCATTTTATGGGTACCCAATTTATCTGTGGACACTGCCTATCAGACCAACATTGTTGCTTAATTAGTCCATGCATCTTGAGCACCATGAGAATGAGATTGTGTATAAAATAAATTATCATGTGCTGTGTGTTGTGCAAGTACTACCTTCTCTAGCTAGATTGCTAGAGCTAGAATTTCAACCTACCTATGTGTACTGATAAGATCTGC
Gma.13217.1.S1_at	CD391191	At4g28240	3e-12	Disease & Defense			CAACGGTGGCGGTAGCGCAAGGCCACACCGATCCCGGCCACAAGTGCAAGACGGCGCTCAACTCCATCCACCACAACCGGAGCCGCCTCTTCTCCGGCGGAGCCCTGTCTGATCTCCGGCCGCTGTCCGGCGTCGTTGGACCTGACGTCTCTGGCGCGGCAGCGGGGAGCTCCGACGCGAAGAATAGGGTGAGCCAAGCCGATGACTCTCTGAGGAAAGTGATGTACTTTAGTTGCTGGGGTCAGGGCTGAACCACACGTGATGAACGGTGGAGATTAAAGTAGTCGCCGGAGAAAGTGAACCGGGTCTGTTTTCGGGTCGGGTTCGGATCTGAGTTGACCTGGCCGAGTCTGATCGGATGACTCGGTTGGAGAAAAAAACTTGGAATGTTCTGATCTT…
Gma.1327.2.S1_s_at	BI970072	At5g25610	1e-53	Disease & Defense			AATGCTCGAGTTATTTCTACAGAAGCAGAAAAGGAAAGTAAGTCCCAAAAATTCTCGGTGAAAGATGGAGTGAAGTTGTTAGCAGAAGATAAGGTCATTGTTTGTCATCCTATGGATTACCCATATGTTGTGTTTATGTGTCATGAGATATCAAATACTACTGCGCATTTTATGCCTTTGGAGGGAGAAGATGGAACCAGAGTTAAAGCTGCAGCTGTATGCCACAAAGACACATCAGAATGGGATCCAAACCATGTGTTTTTACAAATGCTTAAAACCAAGCCTGGAGCTGCTCCAGTGTGTCACATCTTCCCTGAGGGCCACCTTCTCTGGTTTGCCAAATAGGTTACTTAAGTCTTTATTTGTTAGTGTGTCCTTAAATAAGTAGGCATTTCCATA…
Gma.13160.1.S1_at	L10292.1	At3g09640	1e-107	Disease & Defense			TACTGACCAAGATATCGTTGCTCTATCTGGGGGTCACACTATTGGAGCTGCACACAAGGAGCGTTCTGGATTTGAGGGTCCCTGGACCTCTAATCCTCTTATTTTCGACAACTCATACTTCACGGAGTTGTTGAGTGGTGAGAAGGAAGGTCTCCTTCAGCTACCTTCTGACAAGGCTCTTTTGTCTGACCCTGTATTCCGCCCTCTCGTTGATAAATATGCAGCGGACGAAGATGCCTTCTTTGCTGATTACGCTGAGGCTCACCAAAAGCTTTCCGAGCTTGGGTTTGCTGATGCCTAAGCAACGTTTAGGGGATTGTTGAAGAGGCATGGTGCCCATAATATTTCTCTAAAAAATTGTATGGTCATGGTTTTTAATGCCAATGTGGGTTCCCCAGA…
Gma.1190.1.S1_at	AF279267.1	At1g51680	0	Disease & Defense			TGAAAGGATATCTAAATGACCCAGAGGCTACAGAGAGAACTNTAGACANAGAAGGATGGTTACACACAGGAGATATTGGTTTCATTGATGATGATNATGAACTCTTCATTGTTGATCGGTTNAAAGGNAATTGATCAAATACAAAGGATTCCAAGTNGCTCCTGCTGAGCTNGAAGCNTTGTTGATTGCNCACCCAAACATTTCTGATGCTGCCGTTGTAGGNATGAAAGATGAAGCTGCAGGNGAAATTCCAGTTGCATTTGTTGTAAGGTCAAATGGTTCTGAGATNNCCGAGGATGAAATNAAGANATACATTTCACAACAGGTGGTNTTTTACAAGAGAATAGGTAGAGTTTTCTTCACGGACTCTATTCCTAAAGCACCCTCNGGCAAAATTCT…
Gma.11336.1.S1_at	AI442808	At1g18250	6e-66	Disease & Defense			GCAATTAATTAACGAGTGCTCCTTGGTTTAAGTCGATCTCTCCATTATTACAACATGCCGGAAGCCCACCGGCGACCCTGGCGGAGTTCACCCTGGGCAACGAGCAGGACTTCTACGACGTGAGCCTGGTGGACGGGTACAACCTACCCATCTCCATCACCCCCTTCAAGGGATCCGGAAAATGCAGCTACGCCGGGTGCGTGAGCGACCTCAACACCATGTGCCCCGTTGGCCTCCAAGTGCGCTCACGCGACAACAAGCGCGTGGTGGCCTGCAAGAGCGCTTGCTCCGCTTTCAACTCCCCCANGTANTGNTGCACNGGCTCNTATGGAAGCCCACAGGCCTGCAAGCCCACCGTCTATTCCAAGATCTTCAAGACCGCATGCCCCAAGGCCTACT…
Gma.1166.1.S1_at	AY151271.1	At5g34850	0	Disease & Defense			AGTACTGGGGACACAATCGCAGAAGAAGAAAACTGAAGCATTTTCTATTGAAAGTTATTGATGAAGTTGCCAGCATGTAATTTGAAGTTGAAGCACTAGCATATTTGGCGTTTTGAAAAGGATAAAAATGTGCCCCTTGATTAATATATGC
Gma.11154.1.S1_s_at	AW309927	At1g63220	5e-44	Disease & Defense			TTGGCGTGGCAACCATTCATCTGGATCCAGTGTTTGAAGCGGGTAGTATTCCAGAAACTGCTTACAAGGTTGTGAAGGACGAAGAATATTGTGGAGAGATTAAGGTGGCTCTCACTTTTACTGTTGAGAAAAATGAGGAGCAGGATTATGCTGAACCTGAAGAGAGCTATGGTGGATGGAAAGAATCCAGTGGGGAATTTTAAAGTGAAAGAAGTATTTACATACTTCCATGGCCAGAATTACCCTTATAATGAAAAATAAGCAGTTTTGGGGTACTTTTTGAGAATTTCCATTATTGTGTTTTCTGGTGTGAAGCAATGGTGTTGTGCTGTTAGGTTGCTTTC
Gma.10988.3.S1_at	CA938233	At1g47128	0	Disease & Defense			TACAGTTGCTGCCCTAACGACTATCCCATCTGCAACACTTATGCTGGAACTTGTCTCAAGAGCAAGAACAACCCATTCGGAGTGAAGGCATTGAGGCGTACTCCGGCTAAACCCCATTGGACCTTTGGGCGTAAGAACAAGGTCAGCAGTGCTTAAGCAGATAAAGGAAATGTGAACGTGCAGGAAGGAGCCAATGATGAAGTAAATGAAAGACGAAGAATTAAAACACCAGCTGATACACTTCCCCTT
Gma.10720.2.S1_a_at	AW396215	At1g77490	1e-137	Disease & Defense			AAGTGTCATGTTTTCTTGTGCCAGTATCTTTTAGTAATACAAGAAGANGCTATTTTCAAATCANGTGATATCNCATGTAAAATNTNGAAGTTTTAAATGAAGAAGAAAGGAATAAANTTCAATAGTGTGCCTATTTGAATTGCAGAG
Gma.2205.1.S1_at	AF127110.1	At1g70890	3e-23	Disease & Defense			CTTTCAAGCGATTGATAAGGAAAATGACAGTGCTATTATCAAATGGACAATTGAATATGAGAGGATTGGTNGAGGAAGTTGATCCTCCATATGGCTACATTGAATACGTCCACAAATGCA
Gma.17765.1.S1_at	BM188674	At3g60280	4e-26	Disease & Defense			TGTGCCCCATTTCAGGCCACTGTGCTGGAGGCATGAAGCTGCAAATTAATGTGGCTGCTGCTAGTGGGACCCCCCCAACAACCCCAAGTGGCACCCCACCAACCACCCCATCAAACCCTTCTCCTTCTCCTCCCTCTGAGTCAGGATCCACCAACACCACTTCACCACCAAAGCCTAGTGGAGCTGTAACTGTTTCCAGTGGCATTGGCCTTTTGGTGGGGTCTTTCTTTGTGTCAGCAATTATGTTTGGTTTCATGGGCTAGGGAAGAGGCAGTGCTGTTTTTTTTTTNATTCTCCTTTTTATTAATATGTTATTGTTTTGCTGAGAGTTTGTGTGAATTTCATCATTTAATCCAGATGTATATCTAATCTTGATATGTATCTCCTTTTAATATTTAA…
Gma.3333.2.A1_at	CF922006	At5g25610	2e-10	Disease & Defense			AATCATATTATATTTAGGCAGCTTGGAATCAAGCCTGGGAAGGATGCAGTGTGCCACTTCTTCCCTATAAAACATCTTATGTGGGTTCCCAAGCCTTTACAAGCCACCATGTGAATGGAATGAGTTCCCTGGGTTTCTGTAATAAAGGTCAATCTCAACAATGATGACCATGTACCCTTTGTGGACTTCCTCTTTGTTTGTATGTCTTGTGCCTTGTTTTATGTTAAA
Gma.339.1.S1_s_at	AF048978.1	At1g17180	3e-84	Disease & Defense			GAGGTGCCTTCAGAAAGAAAGCGTTGCCAAGTCTCTTCCTGATCAGCAAAAGGTTTATGAGTTCATTATGGATCTAAGAAAGAAGTTAGGCATTGAGTAGGTTGGAGCTTAATGGCCATTGTGAAGTAGTGGTTTTCCATTGGTCGTTCTTAGCCTTTCAAATAAGT
Gma.3570.1.S1_at	CD397063	At3g52960	4e-68	Disease & Defense			AAGTCCTCCTGTTATCTGACGGTAACGGAACCTTCACCAAAGCCATTGGGGTCGAACTTGATCTCAGCGACAAGCCCGTTGGTTTGGGCGTTAGGTCTAGGCGTTACGCGCTTTTGGCCGAGGATGGGGTTGTCAAGCTCTTCAATTTGGAGGAAGGGGGTGCCTTCACTTTCAGCGGCGCTCAGGACATCCTTGATGTTCTTTGAATTATTCTTCCTCTTTCGTTTATTCCACACTCCAGTTACTACTCTTTTCAATCCGGTTAGGGTTTCTTTCCTCTCATAATAACGTGGATGGATTAATTGGACCTCAGTGCTGTTACTGTTACCTGTGCCTATAATAATGAAACTCATGTGCTGGTGTTGAGCTTTTGTGGCCATTTGTTTGGCATTTTCAGGA…
Gma.3578.1.S1_s_at	AW156522	At3g48990	0	Disease & Defense			TTCATTACCGATTCTTTGCCCAAGACTGCCACCGGAAAGATTTTGCGTCGTCTTGTGGCAGAACACTTTGTCTCTCAAATTTGAGCAACTCAAGTCCTACATTTGAAGACTCTATACCTGGCCATACATAGTTGGAGTCCACACACCATAAATTTCAACAGTAGTTTGGCAACTTGGCATTTAGGAGGAGGATATTTCTGCAAATGGTCTTTCATACAGGATACAGTATATTGTAGTTTTCAATGATTCATGTGAAATGTTCACAGTGTAATGTTTTCAAGGT
Gma.3612.1.S1_s_at	BQ452792		1.1e-39	Disease & Defense			AATCCACAACAAAAGCGTGCTGTAACAGCTGTCCTTGCACAAAATCAATCCCTCCACAGTGTCGTTGTTCAGATATTGGAGAAACATGTCACTCTGCATGCAAAACTTGTATTTGCACTCGCTCAATTCCTCCACAGTGTCATTGCAGTGACATAACCAACTTCTGTTATGAACCTTGCAACTCCTCTGAAACCGAAGCTCACTAGGAATATTGAGCATGTTCCAGTGACTAACATGTTTGACAGAGTCACTAGGCTTTGTTTTCATCT
Gma.2444.1.S1_a_at	AF035255.1	At4g35090	0	Disease & Defense			ATGATTGTTAGAGTTGCAGACGTGCAAAGAGTACGATAA
Gma.2444.1.S1_x_at	AF035255.1	At4g35090	0	Disease & Defense			TTCCTGCTAATGCTCCCAAGTGTGCTCACCACAANAATCATCATGAAGGTTTCATGAATTTCATTCACAGGGATGAGGAGGTNAATTACTTCCCTTCAAGGTATGATCCTGTTCGTCATGCAGAAAGNGTTCCCCATACCTCCTGCTATCTGCAGTGGAAGGCGTGAAAAGTGTGGAATTGAGAAGGAGAACAACTTNCAAGCAGCCCGGAGAGAGATACCGNTCTTGGGCACCTGACAGGCAAGATAGATTTNNTCGCCGATGGGTTGATGCTTTATCTGACCCACGGGTCACCCATGANATCCGCAGTGTCTGGATATCNTACTGGTCTCAGGCTGACCGTTCTCTAGGCCAAAAGATAGCNTCTCNTCTNAGCANGAGGCCAAATATTTAATGTTG…
Gma.2444.2.A1_a_at	CD401237	At1g20620	2e-22	Disease & Defense			ATATTTATATACCTTTTCGGCATGTTTCGCTGCTATTGTT
Gma.2302.1.S1_a_at	AW307490	At3g45310	1e-148	Disease & Defense			AATATGGTCCCTGGTGACTACCACCTTGTCATGCTTCAGAGTTTAGAGCGTATTGCTGATGCCAGTATTGATGAATGATGATTAAAGATAAGTGTAATTGTATGATGAAAATTGCTCCTAGTTGGGTTGG
Gma.2302.1.S1_at	AW307490	At3g45310	1e-148	Disease & Defense			TGGAGTTTTCACTAGTGACACTTGTGGTAGCACTTCCCAGGATGTGAACCATGCCGTTCTTGCTGTTGGATATGGAGTTGAAAATGGTGTCCCATATTGGCTCATAAAAAATTCATGGGGAGAAAGCTGGGGTGAAAATGGCTACTTCAAGATGGAATTGGGGAAGAACATGTGTGGTGTTGCAACTTGTGCATCTTATCCAATTGTGGCATAAATTGCATAACAATATGGTCCCTGGTGACTACCACCTTGTCATGCTTCAGAGTTTAGAGCGTATTGCTGATGCCAGTATTGATGAATGATGATTAAAGATAAGTGTAATTGTATGATGAAAATTGCTCCTAGTTGGGTTGGCATGATGTATAAAATAAGCTAGAAGTTGTTGTAAATCACATAAGT…
Gma.2302.1.S1_x_at	AW307490	At3g45310	1e-148	Disease & Defense			TGGAGTTTTCACTAGTGACACTTGTGGTAGCACTTCCCAGGATGTGAACCATGCCGTTCTTGCTGTTGGATATGGAGTTGAAAATGGTGTCCCATATTGGCTCATAAAAAATTCATGGGGAGAAAGCTGGGGTGAAAATGGCTACTTCAAGATGGAATTGGGGAAGAACATGTGTGGTGTTGCAACTTGTGCATCTTATCCAATTGTGGCATAAATTGCATAACAATATGGTCCCTGGTGACTACCACCTTGTCATGCTTCAGAGTTTAGAGCGTATTGCTGATGCCAGTATTGATGAATGATGATTAAAGATAAGTGTAATTGTATGATGAAAATTGCTCCTAGTTGGGTTGGCATGATGTATAAAATAAGCTAGAAGTTGTTGTAAATCACATAAGT…
Gma.2220.1.S1_s_at	AF128268.1	At1g17860	3e-17	Disease & Defense			TACTCAGAAATCTTCCGTGGCACACCAGTCAAATTCAGCATACCTGGGATAAGCCCTGGAATCATCTTTACAGGTACTCCACTTGAAATCGAGTTCGCAGAGAAACCNTATTGTGCTGAATCCTCCAAATGGGTGGCGTTTGTGGACAATGAAATCCAAAAGGCATGTGTGGGTATTGGTGGTCCTGAAGGTCATCCTGGTCAACAAACATTTAGTGGCACATTTAGCATTCAGAAATATAAATTTGGATACAAACTTGTGTTCTGTATCACTGGCTCAGGCACTTGTTTAGATATTGGAAGGTTTGATGCCAAAAATGGTGAGGGAGGAAGACGTTTGAATCTCACTGAGCATGAGGCCTTCGACATTGTTTTCATAGA
Gma.3153.1.S1_s_at	BE822687	At5g02790	6e-91	Disease & Defense			AGATCCAATACATCAAGCCGGTCCTGCCTTTGATTACTTAGAGAATGCTCTTGGTAAATTTGGTGATGGGCCATTCTTTCTTGGTCAATTCAGCTGGGTGGATATTGCTTATGTTCCATTTGTTGAAAGATTCCAGCTCGTCTTTGCTGATGTGTTCAAGCATGATATAACTGAAGGAAGACCTAAACTTGCAACATGGATTGAGGAAGTGAACAAGATTAGTGCTTATACACAGACAAGAGCTGATCCAAAGGAAATCGTTGATCTTTTCAAGAAACGTTTTTTGGCTCAACAGTGAAAATTTGGTTGCAGTGGGTATCCTCTAAGTTGTAGATTGTTGTCAATAAAGTGTTGTGTGTTTATCGGATGCTTCTTTAGTCACATGTTGTTTTGTCACTT…
Gma.2773.2.S1_at	BU765875	At1g65870	2e-38	Disease & Defense			GCTACCGTCGAATACAATGCATATGTCTACCATTATTCTTCCACCAGCTCTTCTTCCTCTCCCCACCTTTTTAATCAGGGACTTCATTTATGTCATGGAGACTACTAAGCTTATAATAAACTCAGAAAAGAAATTAGACTACAGAAGGTGGGGGCATAAATCCAAAGACCAAGTTGCTAATTTACTCCTCTGAATCTGTCCAGTACTATAAATAAATTTGCTCTTTTCGTACACGGAATTAAGTCTTTGTTGTAGTGCAAGTTGCGTCAGCTAAATAATGTGCCACTCAAATATTTTTTCTTTTGGAAATGTTGCCCGTTGATTATTATTTGT
Gma.2821.1.S1_at	AI461152	At4g11650	4e-86	Disease & Defense			TGGGTGCGGTCCCACAGATTATTCCAAGTTCTTCAAGGAGAGGTGCCCTGATGCCTACAGTTACCCTATGGACGATGCAACCAGCATGTTCACTTGCATGGGATCCGATTATAGGGTTGTGTTTTGCCCTTAATTAATTCAACATCATCAACTACTTTTTTTTTNATTTTTTATTTTTATTTTCCTTCTCTAATTTCGTGATTCCTATTTGTGTTATTGTTGAATACTTTGATATGTGTATTATTTATCACCAAATAAAGACGTTCTTAATTGGGGGCTTTGGGCGCGGATCTCTGCCTGCTGAGATGTCCCAAAATAAGTNATAAACATTNACATAAATTAATTCACATGTCCCAAAAGAGTTCTTGTTATTAGAGTCCTAGGGAGTTGATTTATGAT
Gma.2593.1.S1_s_at	CF922368	At3g09270	4e-44	Disease & Defense			GCAGTTATTGCATTCTTCCTTAGCAATAATGATGAAGAGCGAGAAAAGAGCATAGAGAAGATATGGGAGCATCTCAGGGTTGTTGAGAATCAGTGTTTTGGTGATCAGAAGAAATTTTTTGGGGGAGACATTATTAACATTATGGACATAGCTTTTGGGTCCATATTCAAAATTCTTGTGGTTGCAGAAGATATTCTTGACGCGAAGGTCCTGGAAGATGAGAAATTCCCTCACTTGCATTCATGGTATAATAATTTCAAGGATGTTGCAGTTATTAAAGAAAACCTCCCAGACCATGAGAAAATGGTGGCTTTTGCTAAGTTTATTAGAGAAAAACGTTTGGCATGTACCTAAGAAAGTAATCTTATATGAGATCAAGTATGAATCACTTTGTATCTG…
Gma.5312.2.S1_a_at	AW156630	At4g38400	3e-99	Disease & Defense			GATGGGACATGATTCTTTGCTGAAAAATAACTCACATATACGCATAGATAGTAGGCATCAATTTTATTAATACTATACTATAGGCTCACAATGCAACTTATAATAATACTAAGGAATCATGGACTAGCTTAATAAATTTGAAAAGCATTCTTATTTGTAAACCACTCTCCA
Gma.5576.1.S1_a_at	CD417924	At3g10920	4e-92	Disease & Defense			TTGAGATGACAGATTTGCAGCACGGTAAGAGATGTGGAATAAAATGATNNNATGNNATGTAATANATANCACTANNNNTTTTATGTAGTTGTACTGAAGAACCTCGAGCAT
Gma.4312.1.S1_at	BM523337	At2g43350	3e-74	Disease & Defense			AGAAGCTCTTGCAATCTTGAGTACTAAGATTTTATTCTACATATCTAATGTGCTGAGGACATAGGCAATCTGTCCGGTGTCTTCGAAGGACAAGTAGCAATATGTATCATCAATTAATATAATGCCCTGAA
Gma.4312.2.S1_x_at	AI939064	At2g43350	3e-36	Disease & Defense			GTTTGCACAAGGTTCAAGGCTGAATTTCCTATCTTTGATAAGGTNNNNNNNNNNNNNNNNNNNNNNNNNNNNNNNNTGAAGTCAATGGGAAGAATGCAGCGCCACTTTATAAGTTTTTAAAGGAGCAGAAAGGGGGAATATTTGGTGATGGTATCAAGTGGAACTTCACAAAGTTCTTAGTANACAAAGAAGGGAAGGTTGTGGACAGATANNNANCTACCACCTCACCTCTGAAAATCGAGAAAGACATAGAGAAGCTTTTGCAATCTTGAATAGTAAGATTTGATTCTACATATCTAATGTGCTGAGGNNANNNNNNNNNTNNNNNNNNNNTNNNNNNNNCNAGTAGCAATATGTATCATAAGTTAATATATGCCCTGAAAAGTTCTTAATGTATCT…
Gma.4362.1.S1_at	CD405619	At3g11630	1e-107	Disease & Defense			AGTTGACAGTGTGTTCTCGCACCTTGCATGGATCCAAACAGATAGAAAGTCAGGTGGCCTTGGTGACTTGAANTATCCTTTGATTTCTGATGTCACCAAATCCATATCGAAATCTTATGGTGTTCTCATTCCTGATCAGGGAATTGCATTGAGAGGNTTGTTCATTATTGACAAGGAAGGGGTTATTCAGCATTCTACCATTAACAACTTGGCAATTGGTAGAAGTGTTGACGAGACAAAGAGAACTCTCCAGGCCTTACAGTA
Gma.4928.1.S1_a_at	AF002259.1	At1g51680	0	Disease & Defense			GCTGCTGTTGTTCCAATGAAGGATGAAGCCGCGGGAGAGGTACCTGTTGCATTTGTGGTCATATCAAATGGTTATACCGACACAACCNAGGATGAAATTAAGCAGTTTATCTCCAAACAGGTGGTGTTTTACAAAAGAATAAACCGAGTATTCTTCATTGATGCAATTCCCAAGTCACCGTCAGGCAAAATCTTGCGCAAGGATCTAAGAGCA
Gma.4999.1.S1_s_at	CF921017	At3g07230	9e-15	Disease & Defense			CATCTTTGCCATCAGTAAACGACAATGATTTACGACGTTAACTCTCCTCTTTTCCGATCCTTCCTCAGCCAGAAGGGAGGCTCCTCTGATAAGAGGAAATCGGACGAACAGAAGCCAAAAGAGCAGAAACCCAAAGCCAGCGAGAACAAACCTATAATGACTGAGTGATAACAGCTGAGCTGCATTCAGTTGTAGAATGAAAATAGGTGGTAGGTATTGTATTTGGTGCTAAACTAAGATCTTTTTGGCTGTGTTCTGAAGTATATGCCGGCGATGTTGGTCTTTGTTATTGTAATGGTTTGATTTTGGATATGGTTATAACGAAAACTTATAATGGACACAAGTTGAACTTGATGCACGCATGACACATGCAAT
Gma.5039.1.S1_s_at	AF243363.1	At3g09270	1e-62	Disease & Defense			TTGGAGCCAAGAATTTTTGAACCATCCAATTGTCAAAGAAAGTCTGCCCCCTAGAGATCCTGTTTTCTCCTTTTTCAAGGGTCTCTATGAAAGCCTTTTTGGTTCAAAATAGATTTGATGATGTGGTGTGAGACTTAGTATTTCTAAGAATTATGTGTTTGTTAAAGGCTTCTATGAAAGCCTCACTGCTTCAAAATAGATTCATGTATGTGAGACTCAGAATCTCTGGGGAAAATTGTGTGTGGTGTGGACTACTTGTTTTGTTTGTCATTGAGCTATATCGCTGTTAATTAGGATTTTGTTTCAAAATGATGCTTATAAGTTGTAATCTAGGATTTCTCCCTTTGAA
Gma.6231.1.S1_at	CD395324	At1g17860	2e-13	Disease & Defense			AGGGTTCTGGTTTGTGAGCACCAGTGGTGACCCTAATGATATCACTAGCAAGTTCAAGATTGAGAGGCTTGAAGGGGATCATGCTTATGAGATCTACAGCTTCAAGTTCTGCCCCAGTGTGCCTGGTGCGCTGTGTGCTCCTGTGGGGACTTTTGAAGATGCTGATGGAACCAAAGTCATGGCTGTGGGGGATGATATTGAGCCTTACTATGTGAGGTTTCAAAAAGTCTCCATCTTTG
Gma.6472.1.S1_at	BM091717	At5g26990	0.0002	Disease & Defense			GAACACTCTATTTGCTTTCTCTTGATCTTTTTTTTTTCGTATTATTTTCTCATATGTTTCTATAAATTGTCACCTTCCCAATCAATCTAGTACTCTGTTGCAAAACAATGCTTGCTAAGGGCATAATATGCTATCAAGTAGCGTGGGTTTCATTGTCTTCCTAGCATCTCCTAGTTTCTAATGTGTTTCTACTATTTTCTGTAGAAATGTGGAGACATCAACCTTGTCAGTTAAGGATAAGGAGGAGAAGGAAAAAAGATGCGAGTTTGTTCAAGGGCTGTTGCTGTCCACCATACTTGATGACAATTTATAAAGGAAATTCATGGAGGTGGCTGCTTCAGTAGTGGGCGAATTCATATGCGGTACCTGCTATGTATGGTTTGCCTGATGAAATTGTCT…
Gma.6533.1.S1_at	BM526206	At4g39090	1e-140	Disease & Defense			GAACTTTATCATTTGGTACTGGTAAAATTATCTCCGTATAGGATCAGGAAACTGCTAAGACCATGTTGTTTATGTAGTATGTAATTTCTGTATGTATGCTTGACATATACAAGTGGGAAATCCAAGGAAATGTGTGGTCCTAAAAATGGTGCAAGATAAGCAACTCTCTATGGAGATTGGCGGGGTGGGGTTGTTTCAAACTGCAACAGGGGAATACTTGCCACTGATTATGTCTCAGTTATTGCATAATTAAACTAATATACGTGCCACTGTCAATGTTGGTTCTTATGGATGTGGTAGTGCCATACCCAAAAGGATACCAAAATGTTTAAGTTGCTTCTGTACCTTTGATTCGTTTACCTTTGAGTTTGTGCATGT
Gma.6075.1.S1_s_at	AW317183	At3g11660	8e-74	Disease & Defense			ATATACGTATTCTTCCTATCTTCCTCTACGTATTTCTTCTACGGATCACTTTGTTGTTAGACATACATATGTCTGTCTTCGTTACTGTATTT
Gma.5947.1.S1_s_at	BQ610509	At1g24020	0.002	Disease & Defense			GTGACCAAACCAGTTTCGTGCTGCAAAAAGTGGATGCAATTGACGAGGCTAACTTGGTATACGACTACAGCATAGTGGGAGGGACGGGGTTGCATGAAAGTTTGGAGAAGGTTACATTCCAAACAAAGGTGGTTCCTGGCACTGATGGTAATGGCTCTATCGCCAAGGCCACTCTCACATTCCACACCAAANNACGATGCACCACTCTCAGATGCAGTGCGTGATGAAACAAAGGCCAGGGGTGCTGGAATTTTCAAGGCCATTGAGGGCTACGTTTTGGCAAATCCTGCTCAATGATTATCCTTCAAACCACTTGCATGCATGCAATAATAATTATATAAGCTTATGATCTGGTTGTTGGAGTTAATTTGTATCATGTGGCTTTGTTTGGTTTAATTA…
Gma.5950.1.S1_s_at	BQ610563	At5g49040	4e-41	Disease & Defense			TTGTACGCGGGCACCTCACAATCGGAGTTCAATTTATTGATTGTTGTGAATTTTGCCTTGACCGAAGGAAAGTATAATGGCAGCACCATCACCGTGGTGGGGCGGAACCGCCTCTCCCTCAAGATTAGGGAGATGCCTGTGATTGGAGGAAGTGGGGTTTTTAAATTTGCCACTGGGTATGTTGAAACCAGCACTCTCTATGTTGATGCTGATAGGTCTACCATTGANNNNAACATTTATGTTTCACATTACTGATCAATTTGTGGTAACTTTATGTTACAAAACTTCTTCTATGTTCCCTTACGTACTGCTATGATTAATTGGGTATGCGGTGTTTTACATATATA
Gma.7542.1.S1_s_at	CD402549	At1g32210	7e-53	Disease & Defense			GGATCATTTCCATTTAACTCCTTCCTATCAGGAGTACTTTCTTGTGTAGGAACTGCTGTTCTTGCTGTCTGTCTCAGGATCCAAGTGAATAAAGATAACAAGGAATTCAAGGATCTTGCACCTGAGCGTGCTTTTGCGGATTTTGTTCTCTGTAATTTGGTGCTTCATTTGGTGATCATGAA
Gma.6847.1.A1_at	CA853003	At5g15870	5e-60	Disease & Defense			GGTAGTTGGTGTTCTTTGGGCTAATAAGAGGGACAGTGGACTATGGTTTGCACCTNNNGAGTGGAGAGAATGTAGGCTTGGCATTCAACTCTTACCGATACTGCCTATCTCTGAGGTCTTGTTTTCCAATGTTGATTTTGTGAAGGAGCTTGTGGAGTGGACATTGCCTGCTTTGAATAGGGAAGGTGTTGGAGAAGGATGGAAGGGGTTTGTCTATGCTCTGCAGGGTATTTATGACNATGAAGGTGCAATGCAGAAGATAAGAAGCTTAAATGGATTTGATGATGGAAACTCATTGACTAATCTCTTGTGGTGGATTCACAGCAGATCTGATGACGAGGAATTTGGTCATGGAAAACACTGCTGGTTTGGTCATTACTGCCACTANGTATTGTTAAT…
Gma.6999.1.S1_s_at	AF529303.1		3.1e-56	Disease & Defense			TCACTGTCAAATACGAAACAAAAGGAGANNNNGNGCCNNANNCNNNACGANNTCAAAACTGGAAAAGCCAAGGCTGATGCTCTCTTCAAGGCCATTGAGGCTTACCTTTTGGCCCATCCCGATTACAACTAATCCTCTTCAACTTACTTGT
Gma.6999.1.S1_x_at	AF529303.1		3.1e-56	Disease & Defense			ATAGAAAGCATTGCCAGACACGGCGGAGGGTCTGCTGGGAAGCTCACTGTCAAATACGAAACAAAAGGAGANNNNGNGCCNNANNCNNNACGANNTCAAAACTGGAAAAGCCAAGGCTGATGCTCTCTTCAAGGCCATTGAGGCTTACCTTTTGGCCCATCCCGATTACAACTAATCCTCTTCAACTTACTTGTTATCACTTTCTTGCTTTTTCTTGCTTGGA
Gma.6999.2.S1_s_at	X60043.1	At1g24020	1e-07	Disease & Defense			TCACTGTCAAATACGAAACAAAAGGAGATGCTGAGCCCAACCAAGACGAACTCAAAACTGGAAAAGCCAAGGCTGATGCTCTCTTCAAGGCCATTGAGGCTTACCTTTTGGCCCATCCCGATTACAACTAATCCTCTTCAACTTACTTGT
Gma.6633.1.S1_x_at	U89693.1	At3g09270	3e-21	Disease & Defense			ATTTTACTGCCATAAAGTCCGTGAAACAACAGCTTTCNATGGTTCCATTGGTGGCTGGTGATGGAACCAAAACTCAGGCACTTGCTGTTTGCCACTCAGATACTTCTGGAATGAATCATCACATGCTTCATGAACTCATGGGAGTTGATCCTGGAACTAACCCTGTTTGCCATTTCCTTGGAAGCAAGGCCATTTTATGGGTACCCAATTTATCTATGGACACTGCCTATCAGACTAACGTTGTTGTTTAATTAGTCCATGCATCTGCATCTTGGGCACCATAAGATTGTATATAAAATAAATTATGGTGTGTTGTGTATGTTGTGCAAGACCTGGAACTTCACCTTTCTACGTACGTGTGCTGTTAGGATGCAGTGTGCTTTGATGATGCTT
Gma.6743.1.S1_at	BE657937	At4g14420	7e-30	Disease & Defense			ATTGTTCCTGGTTGCTCATTATACCCATTTTCCATTTCTCCAGGATTTGNCTTTNGGTNTCTGTCTGGTTCAGAACGAATGTACCTTCTGTCNGATGNATTATGTNTAATTTATAATTANTNNTATATGTATNNTNNTTTTNNGTTTGCNTGACATTANAAACTNTCTTTCGATTACTAAACTTGTATACGAAGAGGGNNAAAAATGATCANAGCCNNTTCATTCAGACTGGGTGTCAATTTCGTTCTGTCCAACGGATTTGATCGAAAGGTGAAGTCTGGCA
Gma.6803.1.S1_at	CF922291	At2g15970	7e-28	Disease & Defense			ACCCGGCCATTGTTTTGTGATTCATGTTTGTCCTAAGACCTAAAGTTAGCATGTGTTAAAAAGTGGAATAAAATCTCAGTTTAAGTCCTCTGGTTTCATAGAATGTAGAAAACAAAAGATGAAGAGGATTGATGTGGTGTCTTTCTAGCTGTCGTGTATTCATAAATCATGTATGATTTGGGAAATCGTTGTATTTTTACCTGTGGGATATAA
Gma.876.1.S1_at	L78163.1	At5g06720	4e-88	Disease & Defense			AATTTGGACCTGAGCACACCTGATCAATTTGACAACAGATACTACTCCAATCTTCTGCAGCTCAATGGCTTACTTCAGAGTGACCAAGAACTTTTCTCCACTCCTGGTGCTGATACCATTCCCATTGTCAATAGCTTCAGCAGTAACCAGAATACTTTCTTTTCCAACTTTAGAGTTTCAATGATAAAAATGGGTAATATTGGAGTGCTGACTGGGGATGAAGGAGAAATTCGCTTGCAATGTAATTTTGTGAATGGAGACTCGTTTGGATTAGCTAGTGTGGCGTCCAAAGATGCTAAACAAAAGCTTGTTGCTCAATCTAAATAAACCAATAATTAATGGGGATGTGCATGCTAGCTAGCATGTAAAGGCAAATTAGGTTGTAAACCTCTTTGCTAG…
Gma.8824.1.A1_at	BU765628	At1g49570	1e-14	Disease & Defense			ACCAGGCTCTTTTGGGTGACAGCACCACTGCTTCACTGGTCAACACGTATAGCAAGTGGCCTCTTATGTTCTTCAGAGACTTTGGAATATCTATGGAGAAAATGGGTCGCATAGGTGTACTCACAGGATCACAGGGGCAAATAAGAACAAACTGTAGGGCTGTTAACTAGATATATATCCGGCCATTTGCATTTGCTCTTTGTTGGCTTTTAGAAAACTTTGCAGAATGCAGACTTCTATTATATAAATGTATAATAATATGCTAGGGCCTAGGAGCATGTTTGTGTGTTTCGATAA
Gma.8399.1.S1_at	BU546941	At5g14930	3e-73	Disease & Defense			AGAAGCTATCCTTTCATGCAAAGTGTTGAAGGATGAACAATCTAGTGTGACAGAGAAGGAAGAGGAAACTGGGAAGTTGCTTGAATTCGAGAAGTATGTTTATGGGTTGCTCACGAAATATGAAGTGTCATCAGAGATTTTCCTAAGGCAAAGCAGCTACATGATTTGGTGGAATCAGTATAAGGCAATTAAGGGAACTTCTTATAATTCAGCACTCGCAGACTTCATGAGCAATCCCGATCATTATAATGTGCTGTATATTAAGGGAACTTATAATTTCCCCCCTCAGGCTTAGTGATTAGTGAACGTCCGTGTGGTTGAACAGTGTAAAATAAATTGTGGTTTTATCTCACTGTGCACCTTTTAATAAGCTTTTTTTATATTTTCCCTTGTTGATTT…
GmaAffx.10710.1.S1_s_at	AW278629	At4g30320	3e-55	Disease & Defense			TAGAGCACTCCAACGGACCTTACGGTGAGAACATTTTCTGGGGCAGTGGCACGGGGTGGAAGCCAGCACAAGCTGTTAGTGCATGGGTTGAAGAGCGCCAATGGTACAATTATTGGCACAATTCTTGTGCCAATGGACAGATGTGTGGACATTACACTCAGATTGTGTGGAGCACCACCAGAAAAATTGGTTGCGCTAGCGTTGTTTGCTCTGGTGGTAAGGGCACCTTCATGACTTGCAACTATGATCCTCCTGGGAACTACTATGGAGAAAGACCTTACTGAAAATTAATTATAAGAAGTGAGACAAGTCAATAATGTTCTAATAGGATCATAGTAGCTACCCATGTTCTCCGCTGGCATATTACTATTGTCTGATTGCCATGTGCCCATGTGCATG…
GmaAffx.13912.1.S1_at	BI699258	At2g01890	9e-65	Disease & Defense			GAAGTTCTACTACGATGGCCAAGGAGTCATGTCTGTGAAGGTCACTGAAACTGAAATTGACATAGTATTCTATGATGTCTATGGCCATGTTCTACACAAATGGAACACATCCAAACAGCTTCACGCAAGTTGGTGAACAAGTTCAAGATCGAATCCAAGGCATTTAATTATGAAACAAGAAAAGAAAGAAAAAATAAATCTCGGGGACAAGAAACAAAAGTGCATACAAGATAGGAAAAAACAATTGAGCCCTATCATCTCCCCATCTGGTTTGGCTTCATATTTTACACTATGCAATTGACTAAAATCTGTTGTATAATAGTATCTACGGAAAAAATTCTCTCCATTTCTTTCATTTTTATGATTTTGAAAAAATAAATAATGATATTTTCTATTTAA…
GmaAffx.40923.1.S1_at	BG653848	At4g14030	2e-06	Disease & Defense			TATGGATTTAAGCTTACGTGTCGTTATTTCCCTTTAATAAACGGTATCTGTCATATGGTTGTAATGAGCTATTATGCTTTATAAATAATGCTCCTGTGAATCTTCAACATTTCGAAGACAGTTTGCAGTTGCATAAATATATGAAGCTCGTCTCCAAAAAA
GmaAffx.84858.1.S1_at	CA853434	At4g33300	1e-132	Disease & Defense			AACTGCCACAGTTTGAGTCAACTACCTGTTGAATTTGGCAAACTAAGATCACTAGAGATCCTCCGTTTATATGCTTGTCCATATCTAGAAACACTTCCTCCTANCATGTGTGACATGAAGAGATTGAAGTATATTGATATTTCTCAATGTGTTAACCTCACATGCTTCCCTGAAGAGATTGGTAGATTAGNANGCTTAGAGAAGATTGACATGAGGGAATGCCCCATGATTAGGTATTTACCGAAGTCTGCAGTGTCATTGCAATCTCTGCAGCTTGTAATTTGTGATGAGGAGGTACAAGATATGTGGAGTGATGTTGAGATGTCCAACTCAAATGTTCTTATTCAAGTAGCAGAACAACACTATGATCTAGACTGGCTTCAAGAGTGACCCATGTGT…
GmaAffx.7312.1.S1_at	AW459535	At4g24190	1e-06	Disease & Defense			TTATGATTCAGTTAAGACCAGCTTGGACATCAGTCCTGAAGCAACAGTTGAGGAGGAAGATGACACCGAATTAGAGGCTGAAAGTGATTCAAAGCCTGAAGCTGATGCGGTTCATGATGGTGATGTTGATGATGCNAAGGACGAGTTGTAGATTTGCATGACATCCACTATTTAATGACGGTGCTGTCGGTTCCCTTTGTTTTTCATGGTTTCAGCTTTAAGATAGACCGTAAAAGCCTTCTCTAGCATGAGTTTTTTATTTCACAAGTTGTTAAAGGAGAACATTAGTCTTACTGTAATCATACTATCCCTTGGAATTTTGCCGTACCATATCAGTCTTAACACAATGTTCAAGTTCCTAGAAAATATGCTTGTCTTTTTTATATTTTATTTTTAGCA…
GmaAffx.43227.1.A1_s_at	CD416630	At4g11600	8e-15	Disease & Defense			GTTGGATGCATGAATGAAGCTATGAATGACTGGAGCTGCCAATAAATGAATTGTGATTAGAATATAAATTATGAATAAGAAATGTATTGCAGATGCTGCTGCAATTTCCTGTGTGCCTTGTATGTGTACCGAAACAGTTACTCTTGTAGCTCTGACATTAGGTT
GmaAffx.46214.2.S1_s_at	AW351024		1.1e-35	Disease & Defense			GTGAAGTTCCCACTAGTGTTGGATTCAGTTGTGAGCACAATGGTTAAAAGGCCNAAACAAGTCGAGGAGCNNNAANGAGAANGAAGAGGAGGAAGAGGTTTTGGTGATTGAAGGGATTGAGTTTGAGAGAAACACACCTGTGAAATTTGATGTGTTTATCAATGATGAAGATGATAAGCAGATTCGACCAGATAATACAGAATTTGCAGGAAGCTTTGTGAGTGTGCCTCATTCACATATGCACAAAAACAAGGACATCATTACTTGTTTGAGGCTGGGACTTACGGATTTGTTGGAAGAATTGGAAGCGGAAGATGATGACAGTGTTAGGGTGACGCTGGTTCCGAGATATGGGAAAGGGCGTGTNAAAATCAGAGGCATCAAAATAGAGCTTCTTTC…
GmaAffx.46222.1.S1_at	BG650417	At5g62740	9e-18	Disease & Defense			ATAGGAGCATCGTCAAGGTCCTCGTCTGTGTTCATACCTCACGGTCCTGGGGNNGTTAAAGACATTGCCGTGCAAATTCGGGATGGTCTCCTTCAGGCCACTGCCTCACAGAATTAAGCTTTCTTGGAGTTGTAAATAACAAATAGTATGTGTGTCAGGTTTTTTTCAGGAAATGCTTCTTTTGTTTGAACTTATAAAGTCTGCATCTTTACTCTTCTTATATTTGATAGATTCATAGCAGTGTCTATTTTATGTGTAAGTACTGATGTGCAGTTTTGAATACTTGTTTAAGGATAGTCTTAATGTCAAGTTGCTTGTGAATCATTAAGGAATTTGTTATGTAAGAATTACTTCCCNAAANANNNNNNNNNNNNNNANTGTCCTATCTTGCAAGTGGAT…
GmaAffx.6635.1.S1_at	CD412718	At3g11660	3e-11	Disease & Defense			GAATATGTTATTGACACTTGTGGTATGTATACTCTACTCGATCCGATCCAGTGTATTTTTATAGGTACCAATTTCTTCTTCCACTGTTGTTATTGTACGTGTACCTTGTGTACGAATTGGTCGTTAGATGTTTCTATTTTACGTTTTGCTATAGAAATGTGAAGCAGACAAAAGAGTCTCAGATATAGCAAAATTACAAGATGCAAGATGGAGACTAAATGTAATTGAGCTACGATGGCAATAAAATTTCTTGTTTCNANNTNNNANAANAAANNANANNANANNNNNANNAAACGTCCACACGGTGTCATTATCTTTCGTTTTCTCAA
GmaAffx.666.1.S1_at	BM143164	At1g03230	7e-29	Disease & Defense			ACAGAGCCTAGAATGTCGTTCGTTAAAGCTTCAATTGTTATCGGTGGATATCAGTTGGAGGACAATCTTTTGGAGTTTGATGTGGCTTCCTCCAAATTAAGCTTCAGCTCATCGCTGTTGCTCCACAATGCCACATGTTCACGTACTTGAATGTCATAGCCTTATAGCCTTATTACGTGTTGAAATTAGCCACTTTCAATTATCTAGTAGCTTCTATATCTTTCAA
GmaAffx.93164.1.S1_s_at	CF808889	At3g09390	1e-08	Disease & Defense			GGGAGAGCAAGCTTCAAGCAGAGATAGCCCTTAATTAGGAATAATGATAAACTATTAATGTGTAGCTAAAAACTTATGTATTATGTCTGTGATGGTTTTCGTGCACTCTGGTGTTT
GmaAffx.93392.1.S1_s_at	CF807760	At5g42500	6e-42	Disease & Defense			CACTGGGGCTTTTCGTTTTGCACGTGGCTACGCTCAAGCCAGATTTTACTCTGTTGATTTCACCAAAGGAGACGCTATCGTGGAATACGACGTATTCGTGAACCATTATTGAGATTTACTCCTTCCGTTTCGCAATAGTTACGGAGAATT
GmaAffx.91568.1.S1_s_at	CF805995	At1g65870	3e-38	Disease & Defense			TCGTCACTGCCAGTTACCATCAAAGCATCTCTCCAAGCCTTCTACGTTCTCGTGAGAAGCTCACGCACCTTCGCTTCTATTTCCATGAAATTTTTACTAGCGACAAACCCTCTAATCTCGTGATCGACCCCCCCAAGGTGGTAGCCGACTCTCCCCTTCCATTTGGGTCCCAAGTGGTGATCGAGGACCCATTAACAATTGGGCCTGATGTCGAGTCCAAACAGATAGGTAAGGCCCAAGGGTTTTACCTATCCGCAACCCAAAGGCCCGGTTTGGAGTTGGAGATAGTCATGGGGATGGCCTTGACCTTCTTAGAAGGCGAATTTAACGGTAGCAGTTTAAGTGTGTTGGGGAGAAACAAAATCTTCAATGAGGTGAGGGAGTTGCCTATTATTGGTG…
GmaAffx.91208.1.S1_s_at	CF806933	At3g45310	5e-42	Disease & Defense			TGCAAATTCTCAGCTGAAAATGTTGCCGTTCAAGTCATTGACTCGGTCAATATCACCTTGGGTGCTGAGAATGAATTAAAACATGCAGTTGCATTTGTTCGGCCGGTTAGTGTGGCCTTTCAGGTGGTGAATGGGTTCCATTTCTACGAGAATGGAGCTTACACTAGTGACCTTTGCGGTAGCACTTCCCAGGATGTGAACCAT
GmaAffx.91508.1.S1_s_at	CF806158	At4g14710	1e-94	Disease & Defense			AGAACCCAAGGAGTTTGTCTCGTTGGACCAACTTGCTGAACTTGGAGTCCTTAGCTGGAAACTAGATGCTGATAACCATGAAAATGATCCAGAGCTGAAGAAGATTCGTGAAGAGCGTGGTTACACCTACATGGATGTTTGTGAGGTCTGCCCAGAAAAGTTGCCAAATTATGAACAGAAAATCAAAAGCTTCTTTGAAGAGCATCTTCACACTGATGAGGAGATCCGCTTTTGTGCTGCTGGAAGTGGCTATTTTGATGTTAGGGATCGCAATGAAGCTTGGATTCGTGTGTGGGTCAAGAAAGGAGGAATGATCATCTTACCTGCCGGAATTTATCATCGCTTTACGCTAGATGAGAGCAACTACATTAAGGCTTTGCGTTTTTTTGTTGGTGAGCC…
GmaAffx.90703.1.A1_at	CF809087	At5g05340	3e-80	Disease & Defense			TTGAGTCTCGAATATTAAGGGTCCTACTACACATACGCAAGCAATTTAATTGTGTTTAATAAGTTGTTAAAACATGTTTTGGTTGTGTTTTGGATTCCGTGGTGGGTTAATTTCCTAGTGTAGTTGCTGTTATCAATGCCGTATACGTTAGTGTGTGTTCTACTTCCCTTTATTTTTGTCTCTTTTTTACTTTTCCTTGACTATATTGTAG
GmaAffx.90390.1.S1_at	CF806115	At1g71695	4e-96	Disease & Defense			GACTTGCTCAATGATAAGAGGACTAAGGGGTTGGTCAATGCATTTGCGTTGAACCAAACGTTGTTCTTTGAGAAGTTTGTGGATGCTACTATAAAGNTGAGNCAATNNGATGTGCTCACTGGAAATCAAGGTGAAATTCGTGGCAAGTGCAATGTGGTGAATGCTAGGAAGTCTTTGTTGACGTCTGTGGTGGAAGAGGTGGTGCAATTGGTTGATCAGTTTTGAATGGAGCAAAAGTTTGTAAGTTATGTGTAGTTCTTCTTGTGTGGTGTTGTTTAATTGCTAAGGATATGGGTGTGTTCTATTTTGGGGATTGTTGTTTCCTGTTTGACATATGACTCATGTAATAAGGATAAAGTGTTCAGTATTATGTGCTTCTATTTTGTCCATTTTCTCTTG…
GmaAffx.89705.1.S1_s_at	CK606718	At1g76180	1e-11	Disease & Defense			TAATCGATCATCACTTCACTTCACTAATACATCATGGCAGACGAGACCCAGAACAAGTATGAGAGCTCTGAGGTTGAGGTCCAGGATCGTGGTGTTTTTGACTTTCTCGGTAAGAAAAAGGATGAAGAAGACAAGCCTCATCCTCAGGAGGAGGTCATCGCCACCGAGTTTCAAAAAGTCACTGTCTCAGACCAAGGAGAGAACAAGCACAGCCTCTTAGAAAAGCTTCACCGATCTGACAGCAG
GmaAffx.89772.14.A1_s_at	CK606614		7.1e-32	Disease & Defense			ATTCAGTGATCTGCAAAGACCTTGTTTTATATTATATACAAGAGTTTTCTTGCCTTGTGTGGAGTGTTATTCAATCACTTTGAGTGTGTGGTGTGGCTTCCAATTGATGTAACGAGTGTTTCCTTTCTTATTTCCTTTTTCCACAGAATTGTGAGAGCCAGTTGATGTCTTTGTATGTCACT
GmaAffx.89772.4.S1_at	CK606338		1.1e-56	Disease & Defense			AATTATCATCAGTGTCTTGCTTATCATATACAAGAGTTTCCTTGCGTGGAGTACTGTTATTTAGTACTTTGTGCTCAAGTTTTAAGTTGGCTTTCAATGTAATGAGTGTTTCCTTTTATTTTCTTTTGCCTCAGAATTGTAAGAGCTAGTCGATATCTTTGTACCTCCTTCATCAATA
GmaAffx.88762.1.S1_at	CK606334	At3g09270	9e-53	Disease & Defense			CAAATGGAGCCAAGAATCCCTTAACCACCCTTTTGTGCAAGAAGTC
GmaAffx.88762.1.S1_x_at	CK606334	At3g09270	9e-53	Disease & Defense			TTTCTGGTCCAAATTCATTGATGATAAGNNTNTNGGTGCTGNATGGAAATCNGTTTTCACNGNTGATGAGAAAGAGCGTGAGAAGAATGTTGANGAANCANNTGAGGNTCTNCAGTTTCTTGAGAATGAGNTNAAGGACAAGAAGTTNTTTGGAGGAGAGGANNTTGGGTTGGTAGATATTGCTGCTGTCTNCATAGCATTTTGGNTCCCNATNNTTCANGAAATNGCAGGGTTGNAGTTATTCACNAGTGAGAAATTTCCTANNCTCTACAAATGGAGCCAAGAATCCCTTAACCACCCTTTTGTGCAAGAAGTCCTT
GmaAffx.88880.1.A1_at	CK606277	At5g02380	1e-08	Disease & Defense			AAGGCAACCATGACCTTAACACACCCATCACAAGTCCAAAACACTTGAACTTGCTCAAGGGCAAGAAATGACCACTTTATTCTAAGGGTGTTTGTTTAGACACAAAACACCAGAGTGCAACATAATACATACTACATAATTTTGAAGTTTTGAAACTACATATAGTTTTTATCATTATTTCTAAGGGCCATTTCTGCTTGAAGCTTTAGCTCTCCAACACCTCACTTGCAAGTGCAGGGGTTGCAGGTGCAGTTAGCTCCACATTTGCAGCCATCGTTCTCAGCGGGAACACCCATTTCAGCACTCTCGAATTGAGCCTTAACTGGTGCCACTCCCATGACCAAGGTCTCGGTGG
GmaAffx.89881.1.S1_s_at	CK605731	At3g51030	5e-40	Energy			GGCCCCAGTTCTTGCAGAGATTGCAAAGAAAACTCCTGAATTGATCTTCCTCAAAGTGGATGTGGATGAAGTGAGGCCTGTTGCTGAGGAATATTCCATTGAGGCCATGCCAACCTTCCTCTTCTTGAAAGATGGCGAGATCGTGGACAAGGTGGTTGGTGCTAGTAAGGATGACCTTCAAGCCACCATAGNCAAGCATGCATCTGCTGTTGCTGCTGCTTCTTCTTCTTGAAGTGAAGTATCATAATATGAAAGAAGACAAAGAATAATGCATTTTAATGTTTTCAAGTCAGTTTGNATGTTTTCTCTATGGACATTGAGTTGGCAGAACATCGAGTGATGTATAAAAATAAAATTGTTGCATTGTCTTTTTTTCGTATGATTAAATGNCAATTTAGC…
GmaAffx.90214.1.A1_at	CF805939	At2g47380	4e-20	Energy			CCGAGTGTGGTTAAGGAGATCATAATTGGAATAACACTTGGCTTAGCTGCTGGTGGTGTGTGGAAGATGCACCACTGGAATGAACAGAGGAAAACCAGGACCTTCTACGATTTACTGGAAAAGGGTGAGATTACTGTTGTTGCAGAGGAACAGTGAAAATGTTCTTGTTTTGTTGCCTATGCTCTCCATTTATAGGCTTTTTTTTCCCGTGTTATATTCAATTGGCTCTTCAAATGTAAATGAGCCAACATACTATGAGA
GmaAffx.91674.1.S1_at	CF807399	At5g53560	1e-42	Energy			TGTATTTTTCATGTGTTGTGGCCTCTTGCTCAAGTTA
GmaAffx.91723.1.S1_at	CF805997	At5g40760	1e-153	Energy			CTTTGAAGCACTCCCACGGATGTGTATCAAGCATTTGGAACAATATAAGAGACTAAGAGTGTTTGGCACGGTTTGTG
GmaAffx.91826.1.S1_s_at	CF808285	At1g65930	2e-70	Energy			GATGACATCTGTATTGGTTTGCCCTGATGGAAAGACTATTGAAGCAGAAGCAGCNCACGGCACAGTTACCCGNCATTTTAGGGTTCATCAGAAGGGAGGNGAAACCAGCACAAATAGCATAGCATCCATCTTTGCCTGGACAAGAGGGCTAGCCCACAGGGCAAAACTGGATGNCAATGCNAAACTCTTGGATTTCACTGAAAANCTAGAGGCAGCTTGCATTGGAGTAGTAGAGGCTGGGAAGATGACCAAGGATTTGGCACTTATTCTTCATGGATCCAANNNGCTTTCAAGGGAGCATTATTTGAACACAGAG
GmaAffx.92088.1.S1_at	CF807813	At1g51650	6e-29	Energy			GATTTTGAACTTATTGTCAAGTGGCTGTGTAACTTGAGTCTGCTTCTAGGTCCTGAAATGAGAAA
GmaAffx.93326.1.A1_s_at	CF809051	At4g26270	3e-08	Energy			GACTTGTTCATCTACAACTGTATTTGGGGACATGTTTTATCTTTTTGACTCAAGCCCTACAACCTCCAAAGCCTGGAGTATTGGGAGCTGTTCTTTTTGTCCTTTTCCATGTTTTGCAAGTTGGTACGTCTTTCTTTATAAAGACCTACTACCGTCTTGCGTGATTGTTGTACTCAGAAGATTGCTGAATTTTAACCTGGGTCATT
GmaAffx.93486.1.S1_at	CF806564	At3g04120	5e-31	Energy			GTGTACTGCAAAGTTGCTTGTCTAGTTGCGATTTAGTTTCTTGCTCGTGCAAAAAATGAGAGGTCTGAATAAATCGGTTTCTGGAACCAGTGGATTTACCTTGTTAGGAGCATTAGCTCTATTTTGGACTTTGCCTCTTGTGGAGGAGGATGGAGTTTTTGGATTTTTATATATTTGCTAATGTACTTGTCGTTATTGATTGTTATAGTAGATATTTGGCCGTCCTCTATTTTTCCACGTGGTTCTCGTATACTTGTCCATGTTAAGACAGATTCCAGTAATGACGTTTCGGTGGTTTATCGAAACTAATGGTTACAT
GmaAffx.93250.1.S1_s_at	CF808975	At3g06650	2e-95	Energy			GCTATGTGCCGACCATGGTCCTTGTGTCTCTGGTGCTCACAATACTATTGTGACAGCAAGGGCAGGGAAAGACCTAGTTTCCAGTCTCGTATCAGGTTTGCTAACAATTGGTCCTCGATTTGGGGGTGCCATCGATGATGCTGCTCGCTACTTCAAGGATGCTCATGACAGGGCACTTACTCCTTATGAGTTTGTTGAAGGTATGAAAAAGAAGGGAATTCGTGTGGCAGGAATAGGGCACAGGATCAAGAATAGGGACAACAAAGATAAGAGAGTTGAGCTGCTACAGAAGTTTGCACGAACACATTTTCCTTCCGTGAAATACATGGAATATGCTGTTCAAGTTGAGACCTACACACTCACAAAGGCAAATAATTTAGTTCTTAACGTAGATGGTGC…
GmaAffx.93028.1.A1_s_at	CF808753	At3g52990	3e-51	Energy			GCCAGTACTATCTGTTGTGATCCCCCGACTCAAGACAAATCAGCTAAAGTGGAGCTTTAGTGGAGCTTTTGAGGCAAGACAATCACTTATCGTGAGAGGTCTCTTTCCTATGCTTGCAGATCCACGACATCCTGCTGAGTCAACAAGTGCAACAAATGAGTCTATTCTTAAGGTTGCCCTTGATCATGGAAAATCATTGGGAGTTATTAAGTCACATGACCGGGTAGTTGTTTGCCAGAAACTTGGTGATGCATCTGTGGTTAAGATTATTGAGCTTGA
GmaAffx.6490.1.S1_at	AW596567	AtCg00150	2e-73	Energy			TTAGTAGTTCCTATACCTGTCATGTTCCTTGGATTATTCACAAGCGGTATTCAAGCTCTCATTTTTGCTACTTTAGCTGCGGCTTATATAGGTGAATCCATGGAAGGCCATCATTGACCAGTTTTCTACAAAATANGTCCTTTTCGTTTAGCTTGCCGCACATATATTGCGGCTCAATATAATCTACTTAGTAAACATCTATATCTATCTACCTATATCTATATAGATATAGGTAGATAGATATAGATAGATATTCGATTAGCATATATTAGCATATATTAGTATATATTGGATATTCAAAAAAAAAANAANAAATAAAAAAATTAAGAGCCATAATTAGAATTCTGTATGATATTTACGTTTACGGCGTGTGATAAAAAGATACTATATAGAACTAAA…
GmaAffx.34569.1.S1_s_at	AW306183	At5g25450	5e-10	Energy			GAAGCATTGGGAGGTTTGCCCCTATATCAACGATCCATTCCTTGAGTGCATCAAGTATTTCATGAAGGTATTTTGATTGGAGTGGGAGGGTTTAAATTGTATTGATCTTGTGGTAAAATGTTTTCTTATAAGAAAAAAATATGGACAGCTTTGTTGGTATAAACTTATATGGAATGCATTTTTTAATGGTATAAACTTGCCTCGGGCATTTTCTAATAAATGGCAACAACAGACTTTT
GmaAffx.30142.1.S1_at	AW311191	AtCg01100	4e-30	Energy			TATCTCTATTCCATACATATTCGTTTCTGACTTTTTTGAAATAAATCAAACATATGGAGTTTTTGTAACGATAATTGGTATCTTTATTACACTAGCTAAAACTTATTTATTCTTATTCCTTTCTATCGCAACAAGATGGACTTTGCCTAGGCTAAGAATAGATCAATTATTAAATCTTGGGTGGAAATTTCTTTTACCCATTTCTCTCGGCAATCTATTATTAACAACTTCGTTTCAACTGTTTTCACTG
GmaAffx.1301.38.S1_at	CA802260	At4g30210	0	Energy			AGGGATGTACACCGCGCCCTGCACACAATTTTGCAAGAGCAGGGTTCTCTCGATAGTTCCAAGG
Gma.7412.1.S1_at	CD412844	At1g75630	3e-58	Energy			ATTGCGGTTATTATCAGCACTGGGATAAACCCAAAGGCTAAGTCTTACTATCTCTTTGATGGATATGCTCATTTGTCCTCTGGCCTTGCCTGTGGCCTAGCTGGCCTCTCTGCTGGAATGGCCATTGGGATTGTTGGTGATGCTGGTGTCAGAGCTAATGCCCAGCAACCGAAGCTGTTTGTTGGCATGATTCTTATCTTGATTTTCGCTGAAGCTCTTGCTCTGTATGGCCTCATTGTGGGTATCATCCTCTCATCTCGGGCAGGCCAATCTCGTGCCGATTAAA
Gma.584.3.S1_at	BE610674	At5g09600	7e-23	Energy			CTTCGACCCTCTCAATTTTCAATAGAATTGCTGGAGCTTTCCTAGCCGGTGTCATTTTGCTTTTTTATATGATCTATATGAAATTGGGTTTGGTTAGCCTCACCTATGACTCTTTCTACCAGTTCATATTTTATTCATCAAAACTCAACCTGCTTGTCATGGAGATTTCTGCCTTAGCCGTGTCCTATCATCTGTATAGTGCAATTCGTCATTTATTCTTATGATTAGAATCAACAATTGACACCTGAACTGTACGTTTGAACCTGAGGTGGAACTTTGCATAATTCGACCTTGGAGGCATGCATCCATATGTCTGTCAGTCATAAGGAACTTCATTAAGAAATGTGAATTTGCTTTATTGTAGTTATGTATTATTGACTTAATAATTACAATTCTGGC…
Gma.6160.1.S1_at	CD397751	At3g52730	6e-26	Energy			AGTGGTGAATCGAATCTGCAAAGATGGAAGCTGTTTCTCGAAGAAGAGGTGGAGGCATTTTCGAAAGCCTCTACAAGGTCGTTATGCGTCGCAACTCTGTCTACGTTACCTTCGTCATCGCTGGCGCCTTCCTCGGAGAACGGGCTGTAGATTATGGAGTCCACAAGCTCTGGGAGGCTAATAATGTTGGGAAACGATATGAAGACATTCCTGTGCTAGGGCAAAGGCAGTCAGAATAGTGACCAGCTTGTTAGCCATTTTGAAGTTTTATTATTTTCATGAAAATTTGAAGTGATTAAGAGCTGGAAGCAGTTTCCATTTCTACAATAAATACCATATGCTTGTCTCTTTCAGGCTTAACTCTTATGCGTGGTTTCATTTACTG
Gma.6160.1.S1_s_at	CD397751	At3g52730	6e-26	Energy			GTAACCCTAGAGTGGTGAATCGAATCTGCAAAGATGGAAGCTGTTTCTCGAAGAAGAGGTGGAGGCATTTTCGAAAGCCTCTACAAGGTCGTTATGCGTCGCAACTCTGTCTACGTTACCTTCGTCATCGCTGGCGCCTTCCTCGGAGAACGGGCTGTAGATTATGGAGTCCACAAGCTCTGGGAGGCTAATAATGTTGGGAAACGATATGAAGACATTCCTGTGCTAGGGCAAAGGCAGTCAGAATAGTGACCAGCTTGTTAGCCATTTTGAAGTTTTATTATTTTCATGAAAATTTGAAGTGATTAAGAGCTGGAAGCAGTTTCCATTT
Gma.62.3.S1_at	BE658575	At3g14940	4e-15	Energy			TTGTTCTCAGATACACTTTTTTTGTTTTGTTATTATGTTGCCCCACCTTTCTGTACAATTTGGTATGCTGCTCTAGAATTCCAGAAGAGCTAGCTACCACACAAATGAATCAATGACATTGATCTGTTATGTTTCTTATGCTTAGTACCGTTACTACACCCTTCTATACTTCTTTGTATC
Gma.62.3.S1_x_at	BE658575	At3g14940	4e-15	Energy			TGCAGAACACTGGTTAAGTTTGTTTGAATACTGAAAGTGAGTGCTCTAGTTTTGTTCTCAGATACACTTTTTTTGTTTTGTTATTATGTTGCCCCACCTTTCTGTACAATTTGGTATGCTGCTCTAGAATTCCAGAAGAGCTAGCTACCACACAAATGAATCAATGACATTGATCTGTTATGTTTCTTATGCTTAGTACCGTTACTACACCCTTCTATACTTCTTTGTATC
Gma.6556.1.S1_at	CA782240	At3g51030	1e-41	Energy			TGCCCCAATTCTTGCAGAGTTTGCTAAAAAGTTGCCGAATGTCACCTTCCTCAAGGTGGATGTGGATGAATTGGAGACTGTTTCCAAGGAGTGGGGAATTGAGGCTATGCCAACCTTCCTGTTCTTGAAAGAAGGCAAGCTGGTGGACAAGGTTGTGGGTGCCAAGAAAGAGGAGCTGCAATTGACAATAGCCAAACATGCCGCAATTGCTGCTGCTTGAAGTGCCATATGAATATGTTAAGAATAATAGACTATTGTCTTCGAGTCAGTTTGCTTTTATTACTATTAATCTGTTATTGGGTCTGTTTGCATGATTTCAGAACGGATTTAGAGTTAGTAAAACATGGATGGGTTATGTGTAAATGAAATTGTTGCACTATCGTGATTGAAACATTTCTGC
Gma.5057.1.S1_at	AW310849	At5g13440	1e-103	Energy			TAAAAGTGGTTCTGCATTCAAGTGGGATGAGTTTACAATTTATTNTTTAAAAATTTATTTGGACAATGTTACAATGCTCCTTTTGGACGTCGTTTGCCCTCAAGTTCTTGTCGGGTATGTTTAGCAAGTGATTTATGTAGCTTCGAAATTGTAACTGTTACCCTTCGGCGAGCTTATACCAATAATCGCCTGACGTTTACTTAGCATATTGGTGATGGCTTCAAGAATATTGAAGTGTGCATCATGTATAAACATT
Gma.5057.2.S1_s_at	BE475334	At5g13430	1e-70	Energy			TTACAGGTGGTAGGTTTGCTTATGCCTCTTTGGTCCGTCTCCTTGTCCTCAAGTTTGTGCTTAGCATGTCTGCCAGTAAGGATGTTCTTGCTCTGGCTTCACTTGAGGTTGA
Gma.5057.3.A1_at	CA935008	At5g13430	1e-27	Energy			ATGGTTCTGCATACAAGCGGAATGAGTTTACAATTTCTTTTTTTAAAATTTATTTGGATTACAATGCGCCTTTCGGACGTCTTTTACCTTCAAGTTCTTGTTGGGTATGTTTAGCAAGTGGTTTATGTAACTTGGAAATTGTAACTGTTACCCTTTGGCGAGACTTATATCAATAATCGCCTGACTTTTAGTTAGCATATTGTCGACGAGTTCA
Gma.4819.2.S1_at	AW597363	At2g36530	1e-175	Energy			TGGTTCTGCTGCTGTGTATGCTGGTGCCAAATTCAGAGCCCCCGTGGAGCCCTACTGATTGTTTAGCCCAAGATTACTAAGCATCATTTAAATAAGATTCTATTGATGACTGCATAGGACATGTATTTTTTGCGAAAAATAAACTTGTCTACTACTTCAGAGAATATAGGTTTTCCGGGCGTGGAATTTTGAAGCGAGAAAATAAGGCAGTAGATGTATGCCTGATGCCTAGTTTATTTGAAATCTAGCTTTAGGGGGTGTTTGGTGCGACAAATTGTTTTCCAGAATCATAA
Gma.4612.1.A1_at	CD404099	At3g22960	4e-54	Energy			TTTCTTTTGAAAGCCAACATTGCTGCTTGTTCAAAACCTGGGATGCTGCTAGAGTGCTAAAATGGGGCAGAGACTACATGAATGAATTTTGTTCGTTCTGTCATTTTAATTTATAGGACACGACAGAAGTTTGGGAGAGTTAATATTATGGCCTTGAAGTTCTTAGTTTTAATGCATACACCTTCAAGCTCTAGATATCTTTTTTAGTCGAGTGAGGCAATAGTGTAATAGCTACCCTTTTAAGTTGTAAGGCACACATTTGCATTTTCCATGTTTTATATCATTGCATTAGCTTTCCACTTCAATGTTG
Gma.4509.1.S1_at	AW433213	At3g51030	5e-21	Energy			GTAGCATGATTTGTGATTCCTCTAAATATTTTCTTCCACCGATTTTAANNANNNNNTNAANANNGNANNANANTNNNAGAAATTGATTGTGGTGGATTTTACTGCTTCTTGGTGCGGCCCATGCCGTTTCATTGCCCCAATTCTTGCGGATATGGCTAAAAAGTTGCCGAATGTCACCTTCCTCAAGGTGGATGTGGATGAATTGGCGACTGTTTCCNNNNNNNGGGAAGTTGAGGCTATGCCAACCTTCCTATTCTTGAAAGAAGGCAAGCTGGTGAAGAAGCTTGTGGGTGCCAGGAAAGAGGAGCTGCAAGACATAATAGTCAAACTTGCTGCAATTGATGCTGCCTGAAGTGCCATATGAATATGTTGAGAATAATTGACTATTGTCTTCGAGTC…
Gma.5505.1.S1_at	BI942102	At1g13440	1e-149	Energy			GATGATGTTGTGTCTACTGATTTTGTTGGTGATAACAGGTCTAGCATATTTGACGCCAAGGCCGGAATTTCTTTGAATGANAACTTTGTAAAACTTGTTTCCTGGTATGACAACGAATGGGGTTACAGTTCCCGTGTGATTGATTTNATTGNCCACATTGCATCCGTGGCTTAAANANTTGAGNCTGANCTTGGATATCATCGCTANACCGTTCCAAATTTTTATCTTAATCGAGTTTATTTTAGTGTGAATTCGGAATAAACACTTTGTGTTGCTGTGAGAGATATCATTGAAAAACAGTGCAATATGTTGAGTTGGTAGACGGCCTTATAGGTTTTTCCTCTCGTAAGGGACGATTGACTATTCTGTTTCGTTATCATAATCATCTAGTA
Gma.5427.1.S1_at	BM091753	At1g15690	0	Energy			TTGGGCCCGAAAGGATCTGAACCGCACAAGGCAGCTGTTATTGGGGATACCATTGGAGACCCTCTTAAAGATACTTCAGGCCCTTCACTCAACATCCTCATCAAGCTCATGGCAGTTGAGTCGCTTGTCTTCGCACCATTTTTTGCCACTCATGGTGGTCTGCTTTTCAAGATCTTTTGATTTGAGGGAATGCAACCGTACTTAGGGTAGAGTTTTCTATCAATTTATCCTATTTTTGTCGGAGCCTGCAGGCATTTTTCTTTTGTATCAATACCCTCTCCACCTTTAGGGGTAGCTCTTCAAATTATCAGGACTTGAAATTTGTTACCAAATGTAGTAGTAGTTTTTGCCAAAGTGAATTTTCAATTAACCAGCTTTTGGACTTTTCATCGAGTTTTT…
Gma.2650.1.S1_at	AW349689	At5g20080	1e-122	Energy			CTCCCCGGATGACATACTGCTTAAACAAAAGCTTGACATTCTNGCAACAAGCCACCCAAACTTAAAGATATTCTACACTGTAGATAATCCAACNAAAAATTGGAGAGGAGGTGCNGGNTACATATCAAAGGATNTNGTTGTGAAAGGCTTACCCNGNCCTAGTGATGATACTCTNATACTTGTGTGTGGACCCCCNNGTATGATGAAAGCAATATCTGGAGAAAAGGCCAAGGACTGGACACANGGAGAGGTTTCTGGCNTCCTAAAAGAGGCTGGATACACTGAACAAATGGTATACAAATTCTGAGAAGTTTAGTTTTCTTGCATCTGAAGATAGTATTCGAAGCNCTTGTCCGCTGCAGAATTCGTGTACTGAAATGGTTTTCTGAAGAATAACAG…
Gma.2731.5.S1_s_at	BQ299100	At3g10860	2e-26	Energy			ATGCCGGGTCTCTGGAAGGACTTGCCCACGAAGATTCACCACAAGGTCTCCGAGAATTGGATCAGCGCCACTCTTTTGCTCGGTCCCCTCGTCGGCACCTACGCGTATGTTCAAAACTACCTGGAAAAGGAGAAGCTGGCTCACAGGTACTGAGCTCTTGCAAGAGCTGATTGGATAACCTTCTAGTTTGTTGCCTTGATCTTGTTTAGCCACCCAATAATGTGACACTGTTG
Gma.2987.1.S1_s_at	CD393690	At1g14450	1e-19	Energy			ATAGGCTCTATGCTCCCGATCCTCATTCGATTTCTCACGTGAAAGCCGGGGATCACCACTAAACGTTTGGACGGACGCACTCCATTCCATCATCACTTAATAAGCTTGCTAGCATGTTCTCGCAGCCTTTAATGTTTAAATTTCAGACCGTGTTCGCTTCTTTGGCACTCACTATGTTGTCTTGTATGCCTACATTTTATGCCTTCAA
Gma.3969.1.S1_s_at	AW349494	At2g02850	5e-38	Energy			AACGACCCACAATGTGGTTGCTGTGGACAGAAGTGGATACAACAGCTGCAAGACACCAGGGGGTGCTAAAGTGTTCAGTTCAGGGAAGGACCAAATCAAACTAGCAAGAGGGCAGAACTACTTCATATGTAACTACCCTGGTCACTGCGAATCTGGGATGAAAGTTGCCATTAATGCGCTGTGATATACTAGTAGTGCTCAATACTTCTTGAAATGAAGTAACTGTTAAGTTAATGGTCAATTAACTAGCATTAGTAAATGTTAGTGTGTGATATTGTATGTAGTCTTTTTTTTATATGAAGCTGTTATATATATTAATTACTATAGTTTGTGAAGCAAGTGGGAGTGAGCTGGCTTGGTAGATCAATTGTTCCTGTATTTGGTATGTGTTGTGTGGTG…
Gma.3969.2.S1_at	CD412522	At2g02850	3e-37	Energy			GTTGCCATTAATGCAGTGTGATGGTGCTTAATACTTCTTGAGTTGAAGTGAAAATTAAGTTAATGGTCAATTAGCTAGCATTAGTAAATGTTAGTGTGTGCTCATGTATGTACTTTTTTTATATGAAGCTGTTATATATATTTATTAATCACTATAGTTTTGTGAAGCAAAGTGGGAGTGAGCTGGCTTGGTAGATCAATTGTTCCTATGTTTGGTATGTGTTGTGTAGTGGGAGTATAAAAATGGTCCATTAGTCACGGGCTCTTCTTATTAGACATTGGATCTACATATTTTGAAGTTATTGAAAGTCTCAGAGCCAATNATCTGTATCTGTGTGTCGGTGTCACAGTGTATGGTTCTATTACTGATTTTGTTTGCTTCAATA
Gma.3871.1.S1_at	AW349536	At3g18410	2e-47	Energy			GGGCAAGGACGGTCGCCACCCATCTCTCCACGCTCCCAAGGTTGACCCTGTTGAGTCTGAATGACCTTCCTGTGGACAATAATAACAAAAAAAAGGGAAGACCGTTTATCCAACTNATCATATTGCTGAATCGGATATTGGGTTGGAGAAGTGNTTGTTGCAGTTATTGTGTTCATGTTCTTTTTNTTTAGTTGAACTTCCTGCAAACTACAACTGTATTTTGACTTAGCCTTGGCTATTTTTCCTTGGCTCATTAGTCTTATGTTGTTTGTTACCATTTAAATGTAAACAAGNAAGGAAAGGCTATNAACAAAGTACATCACAATCAGATTATGAAATAAGTTTATTCGTTCCCTGTTGATTGTANATGTTATCCATTCCGAATATTCAAAGT
Gma.17476.2.S1_at	BE058960	At2g36460	1e-178	Energy			GTACTGATCAATCTAAGTGCGGGTAGGAATCGGTATTTTATGGGTACAACCGAATTTTCTTGTTAATGAGTATTGTGCTTCGACTCTTCCCAGAATAATAATCGTTTGGAATTTTGCTTTTTGTTTTTCCTAGTGTTCCTTCATATCAATTTTAGTAATTCGGTGTATTGGTCAAACCTGTGCAAACAGGGGAGGGGATGTAACTTTGTTTTCTTGATAGACACCACCACCTTGCTGTTAACGAGGCTTTGTGTTTATTTTGCA
Gma.2011.1.S1_s_at	CD407513	At4g25570	5e-73	Energy			TGGGATTGCCAATCTCTACAGCTTGCATTCATGGCTTGGAATTGGGGTTATTGTCCTTTATGGCATTCAGTGGATATATGGGTTTGTGATCTTTTTCTTCCCTGGTGGGACTCCAGACATTAGACGCGCCTCACTTCCTTGGCACGCGCTATTTGGGCTGTTTGTATTTGTCTTGGCTGTGGGCACTGCTGCTCTTGGGTTTCTGGAGAAGCTCACTTTCCTTGAGAACTCAGGATTGGACAAATATGGTTCTGAGGCTTTGCTTGTCAACTTCACTGCCATTATCACAATCTTATTTGGTGCCTTTGTTGTGTTATCTGCTCTAGCTGA
Gma.16334.2.S1_at	BI973987	At1g80230	2e-45	Energy			ATACACTCTGGCCTTTCAAAATCCTGTGGCCTANGTTTGATTTTGATTTGTCTATACCTTNTTGTGTNNCAACTTTTGAGNTAGAAAGTTTATGCGATTATTTGAACGCAGGATGCTCATTTGCTTGAGCTACC
Gma.17053.1.S1_s_at	BI945957	At3g04120	4e-23	Energy			GTCTTTTTAAGGTGGTGTACTGCAAAGTTNNNTNNNNNNNNNNNNNNNNNNNNNNNNNNNNNGNNNNANNNNNNNGNTCNGAATAAATCGGTTTCTGGAACCAGTGGATTTACCTTGTTAGGAGCATTAGCTCTATTTTGGACTTTGCCTCTTGTGGAGGAGGAT
Gma.17053.2.S1_s_at	AW348911	At1g13440	1e-160	Energy			GTTACTTCAAAGTAGCTTGTCTTCACATTATTACCGTATGTTTATGTTTAGCTGCGATTTAG
Gma.17053.3.S1_at	CA783832	At3g04120	1e-56	Energy			GTTGGTGATAACAGATCAAGTATTTTTGATGCAAAGGCTGGAATTGCATTGAATAAGAATTTTGTGAAGCTTGTCTCTTGGTATGACAACGAGTGGGGATACAGTTCACGTGTCATTGACCTGCTTGTAATCGTTGCCAAGAAGTCTTTTTAATTAAGGTGGTTCTAACATTATGTGCTGGTCAAGCTGCGATTTAGTGTCTTGCTCGTGCAAAAATTGAGAAGTATGAATAAATCGGTTTCCGGAACCAGTGTTGTTACCCTGTTACGAGCATTAAGCTCTTTTTTGTTGCCTCTTCTGTGTAGGGGATGGAGTTTTTTGGATTCTTATATAC
Gma.17053.3.S1_x_at	CA783832	At3g04120	1e-56	Energy			CTCCACCGACTTTGTTGGTGATAACAGATCAAGTATTTTTGATGCAAAGGCTGGAATTGCATTGAATAAGAATTTTGTGAAGCTTGTCTCTTGGTATGACAACGAGTGGGGATACAGTTCACGTGTCATTGACCTGCTTGTAATCGTTGCCAAGAAGTCTTTTTAATTAAGGTGGTTCTAACATTATGTGCTGGTCAAGCTGCGATTTAGTGTCTTGCTCGTGCAAAAATTGAGAAGTATGAATAAATCGGTTTCCGGAACCAGTGTTGTTACCCTGTTACGAGCATTAAGCTCTTTTTTGTTGCCTCTTCTGTGTAGGGGATGGAGTTTTTTGGATTCTTATATACTTGCAGATGTACTCGGGCTTT
Gma.17053.4.A1_s_at	CD407783	At3g04120	4e-10	Energy			TGTCTAGACATTATGTGCTGGTGTCTACCTGCGATTTAGTGTCTTCTTGCTCGGGCAGAAATGAGAAGTATGAATAAATCGGTTTCGGGAACCGGTGTTGTTACCCTGTTAGGAGCATTAAGCTTTTTTTTGTTGTCTCTTCTGTGTAGGGGATGGAGTTTTTGGATTATTATATACTTGCTGATGTACTCGGCTCTTTGTTGATTCTGATTGCAGACATTTTTGCCCTC
Gma.17344.1.S1_at	CD409198	At2g33040	1e-137	Energy			TTCTTCAGAATCTGGCTGAGTTCCAGTTTTCTTGTGTCATGTACAATGCTGTGTTGGAGAATGCTTGTAGTGAGCAAGGAGCAAGAATGTCTGCAATGGACAGCTCTAGCAGGAATGCTGGGGATATGCTTGATCGTCTCACCCTCACCTATAACAGAACTCGTCAAGCATCAATCACCACTGAATTGATAGAGATTATCTCTGGAGCTTCCGCACTGGAAGGTTAATTACAGGAGAGCAATCTGTGTAATATATTCAACAGTGGCGCGATATTAAGATAATATCGTTGGATTCTTTTGAAATTTGTTGGTGTCATTTTTTTAATCTTACTTGACTTCTGTAATAAGTGTTCCAAGGTCAAACCCATTGT
Gma.10771.2.S1_s_at	BU762116	At4g10040	8e-58	Energy			TGTTTACTTTGTTTTGCATATCCGAATGCAATGCGTACTTATATT
Gma.10771.2.S1_x_at	BU762116	At4g10040	8e-58	Energy			GACAATCTGGTACAACTCCTGGATATTCCTATTCTACTGCTAACAAAAACATGGCCGTGATTTGGGAGGAAAAGACCCTCTATGATTACTTGCTCAACCCCAAAAAGTATATTCCAGGAACGAAGATGGTATTTCCTGGTCTTAAGAAACCTCAGGAACGTGCAGATCTTATTGCATATCTTAAAGAATCTACTGCTTAATGATTAAATTTTCATACAGTTATGCACTTTGCTTCAAAGTTCTGGAGATTTAGTTTTCAGACATTTAATTCTGTGGTGCAGTAAATACTGTATCAACAAATAAAGTAGACTTGATTGGTTTGCAATGCTATTTTGTTCGTTTTGCATTGCTTCTTAAGAGGCTGCCATATATTGGCTACTGTTCAATTAATTTGGTTGT…
Gma.11002.1.S1_at	AW350981	At1g15690	0	Energy			GATTGCTATTTCTGCATCCAACACCGGTGGTGCTTGGGATAATGCCAAGAAGTACATTGAGGCTGGTGCTTCTGAGCATGCAAGAAGCCTTGGTCCAAAAGGGTCAGATTGTCACAAGGCAGCTGTTATTGGTGACACCATTGGAGACCCTCTAAAGGATACATCTGGACCTTCACTTAACATCCTTATTAAGCTCATGGCGGTTGAGTCTCTTGTGTTTGCTCCCTTCTTTGCTACACATGGTGGCCTACTCTTCAAGATCTAAAGGATTTGATAGAAAAAGAGTATCGTCCATCATTTTTCTACAACGACAGAACAAGGAAAAGCCGTCCCTTTACCAATGCCTTCTCGTTTTTGTGTTAGTCTTTAACTCATCTGTCATGTCAATTCCATTGTTTT…
Gma.11089.1.S1_at	AI855657	At5g50850	1e-121	Energy			ACAGTTGAAGAAGGGTTTCCTCAGCATGGCGTTGGCGCTGAAATCTGCACATCTGTCATTGAAGANAGTTTTGGTTATCTTGATGCACCNGTTGAGAGAATTGCNGGGGCTGATGTTCCCATGCCNTATGCAGCAAATCTGGAAAGAATGGCTGTCCCACAGGTTGAAGATATTGTTCGTGCTGCAAAGAGAGCATGCTACAGATCTGTGCCTTTGGCNGCATCTGCTTGAATGNTCTGGAAANTTTTCNTGTCCTGGTTAGTTCTTTGCAGAAACAAANTTTTCCCTANTTTCCGCCANAAAACAGCAGGAAGAAATTGCAACCAAAGAATGNTGATTTTAACTCATTTNTTATGTTAGGCTTTGGTTTAAAAGATTCTGTTGTATGCATAATACTGT…
Gma.11220.2.S1_a_at	CF920389	At4g29010	1e-121	Energy			GAAGACTTTGCAATATTATGCCCAATGGAAAGCCTATATCTGTTACTGACCAAGAGATCGTGGAGATGATACTCTTCCCAGTAGTTAATGAGGCATGCCGTGTTCTAGAAGATGGAGTTGTTATTCGAGCATCAGACCTTGACATTGCATCTGTTCTTGGAATGAGCTTCCCAAATTACCGGGGTGGCATTGTTTTCTGGGCAGACTTGGTTGGGGCCAATCATATATATACCAGCCTAAAAAAATGGGCACAATTATATGGTAACTTCTATAAACCCTCAAGGTATTTGGAAGAAAGAGCACTCAAAGGCATTCCCTTGAGTGCACCTGCTTCATCTACTCCAAAGTCAATGGCACGTCTATGAGAAAGCCAAGTGTTGAGCATATATGTTGGATGTT…
Gma.1390.1.S1_at	BE659513	At5g04140	0	Energy			AACTACGGCAGATCAGGTCACTTATCAGTCTGCTTAGGGTAACAATCTAAGGTTACATTACATTGATTACGCCAGGCTATGGAGCCATTGTTGTGTCCCTGATTTGTACAGGAATTGGAGAGGCTATCAATTAGGTGGAAATGCTAGCCAAAATATGGGATTAAACTATCCCTTGAAACCATGGTGCTGCATGTATTCTCAAGATCATTTTTGCCAGCAGTATGAGGAACCCCGTATACATCCATCTGAAGCATTAGCATTCTCTTTTGTATAGCCATGTGAAAGGAAAAAAGCNTGTATATAAAATGCAGTTGATTCGAATTTGATTGGGACTTTTGTGGACGGTCAAAATAAATAGTTGGGGCTTGATATGCCTGGGTCCCCTTTG
Gma.15493.1.S1_at	BE474397	At2g17420	5e-72	Energy			GTTTTTCGCAATTGGGCACGAGCCCGCNACCAAGTTCTTGGACGGGCAGCTTGAATTGGATTCTGATGGATATATTGTGACGAAGCCGGGGACGACGAAGACCAGTGTNGAGGGAGTGTTTGCTGCTGGGGATGTTCAGGACAAGAAGTATAGGCAAGCTATTACTGCTGCTGGCACTGGATGCATGGCTGCTTTGGATGCAGAACATTACCTGCAAAATGTTGGTTTACAACAAGATAAGAGTGATTGACTAGCTTGGGTGTGTCCGGAGATCAGAAAATGCTTAATCAGAAGCAATGTTTAATTCCTATAGAAGAATNGNGANNNNNNNNTGCATCCTACNAGAATCTNCATTTGTGGGTTGCNACATTCATATTTTTATTGCAGANNNAGANTTGC…
Gma.15514.2.S1_at	AI965499	At3g52300	1e-65	Energy			TTTCAATTAGCAAACCATCAGAGGTTGATGTTGTTCTTGCTGGTTTAATAATAACAACTACATTGAATTCTTTGTAACTCGGTTCTCTTTTTCAGTTCAAAGGTTCTTATATTACAGTGTTGAAATTNTGTGGTACTGTAGTTAATCACTTGAGACTTATCCACAAAGTGCGGTTGTGGTCGTCGGCGAAACTGCTGATAAGGTTTCCGTCCGGAGACAATTTGAAGAAAATGTTGTTTTGCGTTAGTCTTAATAAATT
Gma.15514.2.S1_x_at	AI965499	At3g52300	1e-65	Energy			TTTCAATTAGCAAACCATCAGAGGTTGATGTTGTTCTTGCTGGTTTAATAATAACAACTACATTGAATTCTTTGTAACTCGGTTCTCTTTTTCAGTTCAAAGGTTCTTATATTACAGTGTTGAAATTNTGTGGTACTGTAGTTAATCACTTGAGACTTATCCACAAAGTGCGGTTGTGGTCGTCGGCGAAACTGCTGATAAGGTTTCCGTCCGGAGACAATTTGAAGAAAATGTTGTTTTGCGTTAGTCTTAATA
Gma.14966.2.S1_at	BM886910	At1g01620	1e-144	Intracellular Traffic			TCACGTCCCGATTTTGGCTCCTCTTCCAATCGGGTTTGCTGTGTTTTTGGTCCACTTGGCAACCATTCCAATCACAGGAACTGGCATTAACCCAGCTAGGAGTCTTGGTGCTGCTATAATATACAACAGAGACCATGCTTGGGATGACCATTGGATTTTCTGGGTTGGACCTTTCATTGGAGCTGCCCTTGCAGCTTTATATCACCAGATAGTGATCCGAGCAATTCCATTCAAGACAAGGGGTTAATCAATACTTCATCCATCTGTGTTTGAATTATCTTCAATCATGTGTCTATTTGCACAATTTATATGG
Gma.14354.1.S1_x_at	AW755388	At5g59840	4e-92	Intracellular Traffic			TGTACCTACCTCCAAAGGGCAAGCACTTGCTGATGAGTATGGTATCAAGTTCTTTGAAACTAGTGCAAAAACCAACATGAANGTGGAAGAGGTNTTCTTTTCAATAGCAAGAGATATNAAGCAAAGGCTTGCAGACACAGATTCAAGAGCTGAGCCTCAGACTATCAAGATTAACCAACCNGACCAGGCANCCAGTGGTGGTCAACCTGCNCAAAAGTCGGCTTGCTGNGGTTCATGAAAAGAATCAGTATCTGTAGNAAGAGGTGCANNGGTTTCTGCAATAGCACTCNTCTGGGTGCTAATGTTATTCTGATGACATTANAANGTGGGAGCATGTATTTGTCCCTCTGTATCTCCCAACTGCAGATGTCNTNTTTTAAAGTTAATATTTTAAATTCT…
Gma.13352.1.S1_at	M64337.1	At5g01600	2e-80	Intracellular Traffic	Ionic Homeostasis		ATCTTGAATAGCCTTATTATTAGTCTTCATTTACATTT
Gma.12506.1.S1_x_at	CD404127	At3g49870	1e-93	Intracellular Traffic			ATCATTGGGTGGCATCCCTCTGTTGGTATTGGGGAACAAGATTGACAAAGCGGNGGCTCTGTCTAAACAAGCANTGACNGACCAAATGGATTTGAAGTCAATTACTGACAGGGAAGTTTGCTGCTTCATGATCTCGTGCAAAAACTCGACCAACATCGACTCTGTTATTGACTGGCTTGTAAAGCATTCCAAATCAAAGAGCTGAGAGCCTACTTTCTGTTTTGAACTCTAGTGTAATTTATGGGTGACACATTTTCTGGATTTACTAGAGGCATTTGCATGTCTAACTCGGTTGCTGATTGATTTGTTTTTCCCTTTTGTCAGATGCTTTGTAATATAATATCACATCATTCTTGTCCNATAGGGANTTAAACGGGANNANATACATGTGAAGGGTTA…
Gma.11282.1.S1_at	AI443415	At5g59840	4e-90	Intracellular Traffic			GATTCTAAGGCTGAACCTCAGACTATCAAGATTAACCAACCCGACCAGNCAGCNACNGGGGGTCTNGCNGCTCAAAAATCGGCTTGCTGTGGTTCATGAAANAAATAACANNTCAGAATCTGCAGTTAGAGGGTGCAGATTCAACACTNGCCCTCATATGGGTGCTATAGTTATTTTGATGACATTTAAAAGTGGGAGCATGTATTTGTCCTTGTATTTCCCAACTGCAAAGANTATGTTTTGAAGATAGTGNTTTAAATTTTTNGNTTACTTAGNTGTCGGATTTGTTGTGATTANTTCGTTTGCTCCANTCTCTCCTCTTTCATTTGTACNCCGACTCTTGAAAGAAAATCTTTCGATTGGATTCAGATTGATTA
Gma.1045.1.S1_at	CD390651	At3g25040	1e-102	Intracellular Traffic			CAACTAGTACTTTTACAGAGAACTAGAAATATTGACAATTTGACTGGACANTATGTCTTTCTNCTNGGTGCATACAGAGNACTATACATTCTCAACTGGATCTANCGCTACTTTACNGAGCCNCACTTTGTCCATTGGATAACATGGATTTCNGGCCTTGTTCAAACACTACTCTATGCTGATTTCTTCTATTACTATTTCCAAAGCTGGAAGAACAACAAAAAGCTTCATTTGCCAGCATGAGTNTATTCTTCTGTTCTTNAAAACAAGGGTCTANGTGGACAATTAACAGTNAGCAGAGAGGATNCACAAATTTGTCTGGACATAGTGGTTTCTGATTTACAATTGCCTATTTGTTCGTTCTTGCCANCTCAAATACTACTGTACTAATNACTAGGA…
Gma.16342.1.S1_at	BI968678	At5g14420	1e-55	Intracellular Traffic			CTTTGAGCAGAGTGCCCCTTCTTATTATGACAACANGGACCNNGTTGGCACAGCTCCTCCTGCCCCAAGTTCCNCATATGACAATCAGCTTTGCCCCATATGTCTGACCAATTCAAAAGACATGGCCTTCGGATGTGGACATCAGACATGTTGTGAATGTGGACAAGATCTTCAGTCGTGTCCCATCTGTAGAAGCCCCATTAACACCAGAATTAAGCTTTACTAGGNGGCNTCTTCCGTTGTGAATTAANTATTTTGTNGTGTAAGCTAAAATTCTTTGATTTTTTTAACCTTCTCTGGTTGTATACAAACGTTAGATCAGCTGTGTCTATTGATGAAA
Gma.3977.1.S1_s_at	BG238427	At3g56190	3e-97	Intracellular Traffic			ATTGTACTACTATGTGTGTCTGTCCAGTTGTTCGTCTTACACATCCACTTACAGAGTGTACCTGCTTTGGTTTTAATTGA
Gma.3568.2.S1_a_at	BM308236	At2g44610	9e-71	Intracellular Traffic			GAAAAGACAAGTCTCTATAGAGGAAGGAGAAGCAAAAGCACGTGAGCTCAATGTCATGTTTATTGAAACTAGTGCTAAGGCTGGGTTTAATATAAAGGCCCTATTTCGAAAAATTGCTGCAGCATTACCTGGAATGGAAACACTATCTTCTGCAAAACAAGAAGACATGGTTGATGTAAACTTAAAGTCTACAACTGGCAGTGCGCAGTCTCAACCTCAGCCAAGTGGATGTGCTTGTTAANTATACTTTATCATGTGCGGTCCACCTTTTTGTGTCAT
Gma.2369.1.S1_s_at	CA802514	At5g61790	1e-88	Intracellular Traffic			TATACGATGTCATTGAGAAGGGTCAAGAGCAACCAAATCTCACTGTTGGAATTGTTGTAGCCGTTGTGGTTGTCATCGTGTCAGTTTTCTTGAGGCTCATATTTGGTGGGAAGAAGAAGCCCACAAGGGTGGAGAAGACAAACGTAGAACCAGCAGAAACTGCAACTAGCCAAGGCAGTGGTGAGAATGAGGAAAACAAAGAGAAGGAGGAATCATCTGCCCCTGCACGTCGGAGGCCAACAAGGAGAGATAATTGAAGAAATGATTGAAACTTAACAGACAGGGGCGGCCATTAAAGAACACTACCGCACATAAATTTTGAGCTTAGTTTGGGCATTAGGCCAATTCTGTAGTAGCAGGTTGTTGTAATTTTTCCCTTCACCTTTTGAAAGATGATAT…
Gma.4790.1.S1_at	BM270023	At2g45140	6e-80	Intracellular Traffic			TACGTAGTTCTTGTTGGCATCATTGGACTCATCTTGGGTTTCCTNTTGAAGAGGACGTGACCTGAGTGATGGCCAAGTTCTCNNCAAAANGNGATCAATTGTAGAAAGCAACAAGAANTATGTGCGATGATGTGNAAAAACCAANTTGTTGTCTTATTGTCGTGTATTGCTCCTACAAATTTGGAATGTGTGGTCAAAAAATAGGTACTTNTATCAGCCATAGCAATCATAGACANGTGGACAAATTTGTATCATGGGAAGTGTATTGTTATCTGNTNTGGTACATGTGATCAATTCTTTAGTAGTTCCTA
Gma.6298.1.S1_s_at	BM309168	At3g62290	1e-100	Intracellular Traffic			TTGATGCTTTTTGGGAGTCTTCTTGTGGATTGGTGATTCTGGAT
Gma.6207.1.S1_s_at	CF922738	At5g45130	2e-89	Intracellular Traffic			GAGAGGTACCATAGCTTGGCTCCCATGTATTACAGAGGNGCTGCTGCTGCTATCATTGTCTATGACATCACTAGCTCGGACTCCTTTACCCGAGCTAAGAAGTGGGTCCAAGAGCTTCAAAAGCAAGGGAATCCTAATATGGTCATGGCTCTTGCTGGTAACAAAGCTGATTTGGAAGATAAGAGGAAAGTGACAGCTGAAGAAGCACGTGTATATGCTGAAGAAAATGGTTTGTTTTTCATGGAGACCTCTGCCAAA
Gma.7352.1.S1_at	BI701939	At4g04910	1e-141	Intracellular Traffic			TTGCTTGTTACTGTTCAGTTGCAGAGTTTGTGTGTTGCTTGGTTGTGCTGATAGTAATTTTTAGAGGAGACGGGTTTCATAGTTTCTTGTTTTTATCTTTAGGGTTATTACTTAGTTGGAATTGTGCTGCTCTCAAACTGTAATGACCTTTATTGGGGATTCATCATTATCCAAACGTCTTATATTGAGGT
Gma.7062.1.S1_at	AW734156	At4g34450	1e-131	Intracellular Traffic			ATGTGAAGGTTCTTGTGCGGTTGTCTTTTGGACTTGATGGTCCAAAGGATGTTGCGATGAAACTTNCTGTCAGATCCGAGGATGAAACTGTNAGCGATACNATCCATGAGATTGTGGCTAGNGGCTAGTGCACTNNNTCAAGAAATGTTGNCTCAACTCGGCCTTTCTTTTTGTTACTGAGATTGGAGTTTAGCAGCCTCATAGATAGCCGTGTGTAAAAAGNATTGCAAAACTGTACACTTNNNANTATATGCAATTTATTGGTCNCCCATTNNGCATGCTTNGTTAGACNNGCAACAATACTTNCCAGTATTACGTTGGGTNTGTTGGAGTAAACTTCAATGGTGATGATTATACTTTTCATTTATTTGTAGCAACTGTAATACGAATTTTGG
Gma.6811.1.S1_s_at	CA935869	At5g12380	7e-98	Intracellular Traffic			GTGTGATGGTTGATGGTGTTAATCTGTGTTGATTTTGCTTGAGTCTGTTTTCAGTTTTCCTTGATCATGAGAACTTGGAGTTCTATCTTATAGAGTGGTAATATGATAGCTGTTTGGTGGCTTATAAATTATTANNAANAGGCTCAAAATAAAAGATATCTCAGTGGCCATTTGAATTTTTAAA
Gma.6811.2.S1_at	AW100836	At5g12380	5e-95	Intracellular Traffic			ACTCACCCGTGTGGTCGTGAGCCGGGCTGAGAAGGACTTGAAGATAATCTCAGAGGTTTACTACAAGAGAAACAGTGTTCTTCTTGAGCATGCTATTGCCAAGGAAACCTCTGGGGACTACAAGAAGTTCCTTCTCACACTGTTGGGAAAAGAAGACTAAAAACTTTTCTTCGAGGGCATTTGTGATTATGAGTTTAGGACANTAAGCTATACTTGTGTGTGATGGTTTCATGTGTGTTGGTTTTCCTTGAGTCTGTTTTCANTTTTCCTTGATCATGAGAACTTGGAGTTTTATCTTATAGAGTATTAATATGATAGCTGCTTTGTGGCTTTTAAATTGAANAGGNTNAAAATAAATGATATCTCAGTGCCCATTTTATTTTAAA
Gma.6811.2.S1_x_at	AW100836	At5g12380	5e-95	Intracellular Traffic			GCTACAGAGAGATCCATGGCACTTCCATCTCTAAGAAACTGGTGGATGAAGGATCTGATGAGTTTCAAAGGGCATTGTACACTGCCATTCGTGGCATCAAGGATCCTATTAAGTACTACGAAAAGGTGGTGCGGAATGCAATCAAAAAGGTTGGAACTGATGAGGATGCACTCACCCGTGTGGTCGTGAGCCGGGCTGAGAAGGACTTGAAGATAATCTCAGAGGTTTACTACAAGAGAAACAGTGTTCTTCTTGAGCATGCTATTGCCAAGGAAACCTCTGGGGACTACAAGAAGTTCCTTCTCACACTGTTGGGAAAAGAAGACTAAAAACTTTTCTTCGAGGGCATTTGTGATTATGAGTTTAGGACANTAAGCTATACTTGTGTGTGATGGTTTC…
Gma.6653.1.S1_at	U32185.1	At4g17170	1e-100	Intracellular Traffic			GGATATGGTGGAATTCCTGGACCTTCTGGAGGTAGGGATGGCCCTTCTGCTTCGGCTGGAGGNTGCTGCAGTTGAAGAGAACCTATCNNAACCTATCTGCNTCAATGTAGTCCTTTATGTCTTCTCTTCTTTTATTTTGGGTTTGGATATG
Gma.6851.1.S1_a_at	CD403658	At1g09630	1e-103	Intracellular Traffic			GCCGGACAGGAACGATACAGAGCAATTACGAGTGCCTACTACCGGGGTGCCCTTGGAGCTCTTCTTGTCTACGATGTCACTAAACCAACCACATTCGAAAATGTTAGCCGATGGCTCAAGGAGCTAAGGGATCACGCCGATGCTAACATTGTCATCATGTTGATCGGGAACAAGACTGATCTCAAGCATCTCAGAGCTGTTGCCACCGAGGATGCTCAGGGTTATGCCGAGAAGGAAGGCCTTTCTTTCATCGAGACTTCCGCTCTTGAAGCAACTAATGTTGAGAATGCTTTCCAGACTATTCTTGCAGAGATATACCGCATTATCAGTAAGAAATCACTCTCTTCCAATGA
GmaAffx.1301.59.S1_at	BI974591	At1g35720	4e-47	Intracellular Traffic			ATGGCGACACTTAAGGTTCCTCAGCCTCTTCCCCCCGTTGCAGATGATTGTGAGCAGCTCCGAAAAGCCTTCTCAGGTTGGGGAACTAACGAGGAGCTGATTGTATCGATCTTGGCTCATAGGAATGCTGCTCAGAGGAAGCTTATCAGAGAAACTTATGCCCAGACCTATGGAGAAGATCTCCTCAAGGCCTTGGACAAAGAACTCACGAGTGATTTTGAGAGGCTGGTTCATCTTTGGACACTTGATTCTGCTGAACGTGATGCATTTTTGGCAAACGAGGCGACTAAAAAATGGACTTCAAGCAATCAGGTTCTGGTGGAAATAGCCTGCACTA
GmaAffx.1301.22.S1_s_at	BI945611	At1g35720	3e-20	Intracellular Traffic			ACACCACCGGTGACTATGAGAAAATGCTTGTGGCGCTTTTAGGACATGATGATGCTTGACATACTCCTTTGTGTTTGTGTGTGTGTACTTGTGGCAGAGTTACTATATAGTGTGCAGTGTACTGCTTTGTGGTTCCAT
Gma.8407.1.S1_at	AW348317	At1g10630	1e-100	Intracellular Traffic			GGAGGCATTATTTCCAGAACACTCAGGGTCTCATTTTTGTGGTTGATAGCAATGATAGAGATCGAGTGGTTGAGGCAAGGGATGAGCTGCACAGAATGTTGAATGAGGATGAACTTAGAGATGCTGTTTTGCTTGTTTTTGCCAACAAGCAAGATCTTCCTAATGCAATGAATGCTGCAGAAATAACTGACAAGCTTGGACTTCATTCACTCCGTCAACGCCACTGGTATATCCAGAGCACTTGTGCAACTTCTGGAGAGGGTCTCTATGAGGGTTTGGACTGGCTTTCTAACAACATTGCCAGCAANGCATGAGACATTTGAAAAATTTTGGTCTTGTCTGGTGATTTCNTGCNGAGTCTGGCGGTTCTTGGAGAAAGATGCTTATCTTTTCTAGCGA…
Gma.8407.1.S1_x_at	AW348317	At1g10630	1e-100	Intracellular Traffic			GGAGGCATTATTTCCAGAACACTCAGGGTCTCATTTTTGTGGTTGATAGCAATGATAGAGATCGAGTGGTTGAGGCAAGGGATGAGCTGCACAGAATGTTGAATGAGGATGAACTTAGAGATGCTGTTTTGCTTGTTTTTGCCAACAAGCAAGATCTTCCTAATGCAATGAATGCTGCAGAAATAACTGACAAGCTTGGACTTCATTCACTCCGTCAACGCCACTGGTATATCCAGAGCACTTGTGCAACTTCTGGAGAGGGTCTCTATGAGGGTTTGGACTGGCTTTCTAACAACATTGCCAGCAANGCATGAGACATTTGAAAAATTTTGGTCTTGTCTGGTGATTTCNTGCNGAGTCTGGCGGTTCTTGGAGAAAGATGCTTATCTTTTCTAGCGA…
GmaAffx.91556.1.S1_s_at	CF807281	At2g32670	1e-90	Intracellular Traffic			AATATTGAGAAGGTTCTTGACCGTGGGGAGAAAATTGAGCTTTTGGTGGATAAAACAGAGAACCTTCGCTCTCAGGCTCAAGATTTCAGGCAGCAGGGAACCAAGATTAGGAGAAAGATGTGGTTCCAAAACAT
GmaAffx.91944.1.S1_s_at	CF808330	At1g59950	9e-91	Metabolism			GAAGCTTCAGAATCTGCTCTCTGTTGCTACCATCCGTCCCGTGGTCGATCAAGTGGAGATGAACCTTGCATGGCAACAGAAGAAGCTAAGAGAGTTCTGCANAGAAAATGGGATAATACTGACTGCGTTCTCTCCACTGAGGAAAGGTGCGAGCAAGGGCCCAAATGAAGTGATGGAGAATGATGTGCTGAAAGAGATTGCAGAGGCTCATGGGAAATCCATAGCCCAGGTGAGTCTGAGATGGTTGTACGAACAAGGTGTGACATTTGTGCCAAAGAGCTACGATAAGGAGAGGATGAACCAGAATCTGCA
GmaAffx.92117.1.S1_s_at	CF807842	At5g37600	5e-89	Metabolism			GCAGAGTACATATGGATCGGTGGATCAGGAATGGACCTGAGGAGCAAAGCAAGGACTCTCCCAGGACCAGTTAGCGACCCTTCAGAGCTTCCCAAGTGGAACTATGATGGTTCCAGCACAGGTCAAGCTCCTGGTGAAGACAGTGAAGTGATTTTATACCCACAAGCCATTTTCAGGGATCCATTCAGAAGGGGTAACAATATCTTGGTTATCTGTGATGCCTACACTCCTGCTGGAGAACCTATTCCCACTAACAAGAGGCACGCTGCTGCCAAGGTTTTCAGCCATCCTGATGTTGTTGCTGAAGTGCCATGGTACGGTATTGAACAAGAATACACCTTGTTGCAGAAAGATATCCAATGGCCTCTTGGGTGGCCTGTTGGTGGTTTCCCTGGACCT…
GmaAffx.92143.1.S1_s_at	CF806865	At5g22140	3e-17	Metabolism			GGGAGAGAGAAAATTTCAAGCACAAAAAATGGCGGAGAAGAAAGTGGTGATCCTAGGAGGTGGTGTTGCCGGTGCCAACCTTGCAAAAACTATACAACGTCAAGCCAACGTCACCCTTATTGATCCGAAGGAATATTTTGAGATTCCATGGGCAAGTTTGAG
GmaAffx.92851.1.S1_s_at	CF808576	At1g59950	7e-91	Metabolism			ATCCCTCCCGCAGTGAATCAAGTAGAAGTTAACCTTGGGTGGCAACAACAGAAGCTTAGAGATTTCTGCAAGGAAAAGGGTATTACTGTAACTGCCTTCTCACCCCTGAGGAAGGGTGCTAGTAGGGGTGCTAATTTTGTGCTGGACAATGATGTAATCAAAGAATTGGCAGATGCTCATGGCAAGACTGCAGCCCAGATTTGTCTTCGATGGCTATATGAACAAGGGTTGACTTTTGTGGTTAAGAGCTATGACAAAGAGAGGATGAAGCAAAACTTGGGGATTTTTGATTGGTCACTGACTGAGGATGATTACAAGAAAATAAGTGAAATCCACCAAGAGAGGCTCATCAAAGGACCAACCAAGCCTCTTCTTGATGATCTATGGGATGAAGAATGA…
GmaAffx.92410.1.S1_s_at	CF808078	At1g51410	1e-118	Metabolism			TGACCTACTTGACCCAGCAGTGAAGGGAACTCTTAACGTTCTTAAATCATGTGTAAAATCGCCATCTGTGAAACGAGTCATCTTAACATCTTCTGTGGCTGCAGTTGCATATAATAAAAGGCCTAAAAGTCCTGAAGTTGTAGTTGATGAAACCTGGTGGTCTGATCCAGATTACTGTAGGGAATTAAAGCTGTGGTATTTACTTTCAAAGACTTTGGCTGAAGATGCTGCCTGGAAATTTGCCAAAGAAAACGACCTTGACTTGGTTGTTGTTAACCCAGCAATGGTTGTAGGGCCTCTTTTGCAAGCAGAGCTTAACACTAGTGCTGCTATTATTTTAAACCTAATAAATGGTTCAGAAACTTTTTCAAATGATACATATGGATGGATCAATGTGAA…
GmaAffx.93074.1.S1_at	CF808799	At3g02360	1e-115	Metabolism			GCTTGATACAAAATTGTCCCAGCTCATGGTGCCTTTTTAATTTTCACATTT
GmaAffx.93157.1.S1_s_at	CF808882	At2g37790	2e-48	Metabolism			GATATTCTCCACTAGGTTCACCAGCAGCTCTCAAAAGTGATATTCTTAAGAATCCTGTTGTCACAGAGATTGCAGAGAGATTGGGGAAGACACCAGCACAAGTTGCCCTTCGATGGGGCTTGCAAGCAGGTCATAGTGTGCTTCCTAAGAGCACTAATGAGTCCAGAATCAAGGGAAATTTTGATATCTTTGACTGGTCTATTCCTCAAGATTTGATGACCAAGATCTCTGAAATTAAGCAGGAAAGGCTAGTTAAGGCCAGTTTTTTTGTTCACGAGACCTATGGTGCCTATAGGAGCATTGAAGACTTCTGGGATGGTGAACTCTGAGCAATATGCATCTTTGAGACGTTGAAAAATACATTGCTCCTAGAGC
GmaAffx.90376.1.A1_at	CF806101	At1g55740	4e-52	Metabolism			ATGCAGCCTTTGCATCGTTCCCATACAGTATGAATTGGTTGCTCTTGGTTTCATTATGCCTCATTTTTAAGAAGTTCATTGTAGTTTCGTTAAGCTAGAAAAGAAATATACGGATAGAAATGCATTAAGATTAGCCCGCATATCCTTTAAATGGA
GmaAffx.90954.1.S1_s_at	CF806679	At4g30440	1e-113	Metabolism			TGCAAACCGGGTTGAAGAAGTTCGTCAAGTGGTACCTTTCCTATTACGGCTACAATCACGGCAAACCTGTAAATTAAT
GmaAffx.90163.1.S1_s_at	CF805888	At5g18670	6e-21	Metabolism			TTCTTCTGAGTCTGGTGTTCCAGGTGGTTTTGAACAAATAAAGAAGAATCTATCTGGAGATATATGTATTGGATTTGTTCACATATCATAGAATGGGAGCATCTTTCTTTTCTCCAGAGCATTTTCCTTTGTTCACCGAGTTTGTCCGGAGCCTTAAGCAACCTGAACTGCATTCAGATGATCTACCGGCCAAGGAGGAAGAAGGCGCCGAATCTGCCATGGATATGAGCCATGAATCAAGTGTGAGCATGCAAGCAGCCTAATGGTTGTAAATTCGTAATGTATGATAATCATGTAGATAACAATTAGTTATACCCTTGGATCAGTGCATGGGATGAGATTGAGAACAGGTTATTTTGTAAGCACAATATGAGAATCTTTTTTGCCGGTTTATCCTCA…
GmaAffx.89435.1.A1_s_at	CK606245	At3g17390	2e-78	Metabolism			GCAAATGGCCTTGCTAGAAGGTGCATTGTGCAAGTTTCCTATGCCATTGGTGTCCCTGAGCCCTTGTCAGTGTTTGTGGACACTTATGGAACTGGGAAGATTCCTGACAAGGAGATTCTGCAAATTGTGAAGGAGAATTTCGACTTCAGACCTGGAATGATCACCATTAACTTGGACCTTAAGAGGGGTGGTCATAGGTTCCTCAAGACAGCTGCCTATGGACACTTTGGAAGGGATGATGCAGACTTCACCTGGGAAGTTGTGAAGCCACTCAAGTCAGAGAAGCCTCAAGCTTAAGAGTGTTGTTAAGTTAATCACTCCCTTCAGTGGATGTCTTGCTGGGTGTGGATGAATAATTTGCGTGTTTCATGACTACTACTACTACTACTCCATTCAATG…
Gma.8351.1.S1_s_at	AI443561	At5g19440	4e-99	Metabolism			AAATGCATCTTTTGGTTGGGTCAATGTGAAAGATGTTGCAAATGCCCATATTCTAGCATATGAGAATGCTTCAGCTAATGGAAGGTATTGTTTGGTGGAGAGAGTGGCACACTACTCAGAAATTGTGAAGATTTTACGTGATTTGTACCCGACATTACAACTTCCAGAGAAGTGTGCAGATGATAACCCATATGTGCCAATATATCAGGTATCCAAAGAAAAGGCAAAGAGCTTGGGGATTGAATATACTCCTTTGGAAGTGAGCCTCAAGGAGACTGTGGATAGCTTGAAAGAAAAGAAGTTTACCAACTTTTAATTTGTGATATCTCCTAGAGGAGAAAACGTTAATAATAGAAACCTTGTGTGGTTGGTCACTTGGCTTGTGATGCTCATGCTTCT…
GmaAffx.1301.127.A1_at	CD406089	At2g44160	3e-05	Metabolism			ACTTTAGCTATGTCACTTCTGTTGGTTGTCATGTTCTTTTCCTTTCTTTTGTTTTCTTCTCAGTATGATGATTCATATTACACATGGTTCTAAGTTGAAGTGCCAAATTATTTTTCTGGGCTATGTCCCTAACGTCTTTATATTTTCATTCTTCAAAGTCGCATGGGTAACCTGTACGTTGACATAAGGACAAGTTACTCCTTCCTCTGAATTGGATGTTTCTTAAT
Gma.9551.1.S1_at	AY157739.1	At4g09320	2e-72	Metabolism	Nucleotide Biosynthesis/Metabolism		GAGAAGAAAGGTTTCTACTTGAAAGGTTTGAAACTTGTTACTGTGGACCGTCCTTTTGCTGAGAAGCACTATGCTGATTTGTCTGCCAAGCCTTTCTTTAGTGGTTTGGTGGATTACATTATCTCTGGCCCTGTTGTTGCCATGATCTGGGAGGGCAAGAATGTTGTTACAACTGGCCGAAAGATTATCGGAGCCACAAACCCAGCTCAATCTGAGCCTGGAACTATCCGTGGTGACTTTGCCATTGACATTGGAAGGAATGTTATCCATGGAAGTGATGCAGTTGAAAGTGCTAACAAGGAAATTGCATTGTGGTTCCCTGAGGGCCCTGCTAACTGGCAAAGCTCCCAACACTCTTGGATCTATGAGTAAATCATATGCCTCAAGTTGATCTTGAAA…
Gma.9622.1.S1_s_at	BQ610840	At5g54160	2e-48	Metabolism			GATTCATATCAAGTTGCATTTGGATTTTGACTTTGAGACTCTGCTTGGGGTGCTACTTACGAATGTTTTCCCGGAAAAACGTAAATTTCTTCTAATGCTTTATGAAAAGAATAACGAACAAGTTCAATGTATACCGCCTTTATAAAATAATA
Gma.9622.1.S1_x_at	BQ610840	At5g54160	2e-48	Metabolism			TGAAGAACTGCTATGAGGCACTACCAGATAATGGGAAAGTGATTGTGGCGGAATGCATTCTTCCGGTGGCTCCAGACTCTAGCTTGGCCACAAAGGGTGTGGTTCACATCGATGTGATCATGTTGGCTCACAATCCAGGNGGGAAAGAGAGAACAGAGAAAGAGTTTGAGGCTCTGGCCAAAGGCTCTGGATTCCAAGGNTTCCAAGTCCTGTGCTGTGCTTTCAATACCTACGTCATGGAATTTCTCAAAAAGGTTTAAGTTCTTTGGCGTGGATTCATATCAAGTTGCATTTGGATTTTGACTTTGAGACTCTGCTTGGGGTGCTACTTACGAATGTTTTCCCGGAAAAACGTAAATTTCTTCTAATGCTTTATGAAAAGAATAACGAACAAGTTCA…
GmaAffx.37677.1.S1_at	BE022626	At1g49650	8e-09	Metabolism			TTGTCACCATTATCAATACCTATCACTGTATGTGGT
GmaAffx.38388.1.S1_s_at	CA852972	At1g69640	0.005	Metabolism			GGTTTTGAAACTAGACCTTGCAAAGATTACAAGGATGATTAACTTTTTTGCTTGATGAGCATTCTTTATCTGTACTAGTATTGTTTTCCCTTGTTATGAGCAGCTTCTCCTTTCTCTTGTGATGCCTGTATATATACATTTGATGTGTCCTGTTCGATATTTTTGTTTCCCTTATGTCCATACTAGATAGACATAATAAAGGAAATTGAGGTGCTACCTATTACCA
GmaAffx.1968.1.S1_at	BE657555	At3g05020	1e-29	Metabolism	Fatty Acid Biosynthesis		AAACATGTACCAGATAAAAAATTATTTCTGCTAGACATGCATAGTTTTATATATTTTAGTATTGCGGGGTATAGTCTGAAGTGTTTTATAT
GmaAffx.64716.1.S1_at	BE822506	At5g64460	1e-08	Metabolism			GGATCATTTTCCTACAACTGTTAAACATTGATGACCATTGACCAATCTAGCCAATCCTGGGTGATGTTCATCAGTTTATATTTTGAAGTAAATGATTGATTCGTTTCACATGTCCTTACAGCTTTGCTAATTGTGAACTTCGCTCCATGGTCATTGTGGATAGAGGGTGAGTTTGTGAAAATATACATAAAAAAAAAACAGGTTTCTTTTTATCTTAATCGAGATTTGTTTGTTTTTTCTCCAGTATGATAGGATTGGAACAATCAACCACTAACTATCCAGGCAAGATACCTTCAGGGCTGGACCTCCCTAGTGATGTTGCAGATGAGAAGTCTGAGAAATAATGGATTTGGCTTCTTCTACTTGTTTGTATGTGTTCAGGACCATTCAAGCATTGGT…
GmaAffx.66796.1.S1_at	CA818986	At2g21250	2e-47	Metabolism			GGTCATTCCTAAATCGTCAAAACTGGAGAGGTTGAAAGAGAACTTTCAGGTTTTCGATTTTGAGTTGTCTAAAGAGGACATGGAGCTCATTGGAAGTATAGATAGAAAATATCGAACCAATCAACCAGCTGTGTTTTGGGGCATAGATTTGTATGCGTGAGAATGCCCTTCCTAAGTCTGTATCATGGCTGTTTGACCTTGTGTTAAGATTCAGATTTGGTATAAGCTGATCTTTCAGGCTCCTTAGTAGCTCAGTTTATTTGATAATGTAAACTTTCTTTGTTGATGGTTGAAAAATCATCTTCTCATCCCATATCCAATCTCGTGGACTAAATAAGAGAGACTTCTGAATGTTGTTGCTTAA
GmaAffx.43676.1.S1_at	AW234124	At5g50950	1e-19	Metabolism			GGACCGTCTGATTGACTAACTCGCAATGTTTTGTTCTAATAATTCCTTGTTTCATCATATCGGCTACATTTGAGGTAGTATTTTTTTAGCTACACCCGTTGATTGGTTTGAGAAATGGCAACCCAATGAACAATAATTTGGCTTCCTCAGTTGATATTCGCGAGGGAAGAGTTCTTCCAAATTTGTAACGAGA
GmaAffx.43920.1.A1_at	BU761199	At1g60140	4e-08	Metabolism	Trehalose Biosynthesis		TTCAGGGCCTTGCTGCTTCATCCAATCCAAAACCCAGGCNTCTTGCTCATTCTCAAGTCTNTTTTGAGAGCACAGTTTGAGTTATAGANAAGTTAAGACAGCANTTATTGGTCNTCTCCTGTGAATCNATGAAATTTTTGGTTATTAATCTTAACCTGACAAACAAATGGNGCGGATCTAATTCTTTTTTGGGCTCCTGANCCGGTTTGCGTGGCATCNATCTNGGNGGNNTTTTGTTAAATANTGCGGTTCATTGNTGCCTNACAATTCTTCTCTTGTACATGGTAACATCANTTGTTATATTTGCTGGTGCCACCGAGAGCTTTAGTTGTGCTTAGAACTGTTAGATCNTTATCATCGCTGTTTGCACTGAACAATGGGGNCACCAAAACCTGTATA…
GmaAffx.23763.1.S1_at	BU579160	At5g65110	0	Metabolism			GAATGACATTGGAACCTACCGAAATGTTGACTATGTGGCTCCCAACAAAGCCAAGGCAATCCACAAGCTCGCGGAGTATCTTAGTTTCCAAGTGAGGAATATTGCAAGGGAACTTGTTGATGCATTTGATCTTCCGGATCACGTTACACGGGCCCCCATTGCCAAGCGGTCAGGGGCCTACTCGCAGTACACACAATATGTGGGATTTTAAAAAAAGGAACGCAAAGAAGATTGATGTATTTGCGGGAATTAACATGAGAAAATATTTTCTTGGCTCATTGTTGAAATTTATATGCTAGTGGTTGCTCCTGACCAAGAAACTACTACACACGACCAGAACCATAAATGAATGAAATGAAGTTTCAGTCGAANANANNANNNNAAANNNAAAANNANNNN…
GmaAffx.50033.1.S1_at	BU550874	At3g57610	8e-60	Metabolism	Purine Base Biosynthesis		GTTTCTCATCGTTGAATCTTACCAAGCTNGATGTTTTATCAGATCTTGAAGAAATACAGTTNGGTGTCTNTTACAAACTTGCTGATGGCACCCCAATCAAATCATTCCCTTCAGATCTNCGTCTTCTTGAGCAACTGAAGGTGGAATATGAAGTACTTCCTGGATGGAAATNTGATATNTCTTCCATAAGAAACTATTCTGACCTTCCAAANGCTGCNAGGCTGTATGTGGAAAGGATAGAAGAACTTGTGGGGGTCCCTATTCACTACATTGGTATTGGGCCAGGACGTGATGCTCTCATATACAAATGAGTTCACATTGGATTTGCATGCCTCTGTAGGTAAGTTGAGGCTTTTTGCGGTAGAGGTGTCGATTCCCGCTAAGTTTCAGTTTTTTTGG…
GmaAffx.49284.1.A1_s_at	BE658665	At2g36790	6e-07	Metabolism			AGGTGGTTCTTCTTACGACAGTCTCACGGCTCTGATTCATCATTTCAAGACTCTTGTGCCTAATCATGTGAATGGGAATGGGAATATCGATCACTGAATGAATATTACATTGATTCGAGTTTCATGTTTTTGATTATTAGTTATTTATCAAGTGAATGCATGAATGCCATAATTTTAGGGAATCTTAATCCGGGTAACTGGCTAGCTACCCTAAATTT
GmaAffx.5285.1.S1_at	BM523736	At5g07870	5e-26	Metabolism			TAATGAGCGCTCTGGAATCTGATGAGGAGTTTATGAATGTTGTCTCGGTTTCCAATCCCTTATGCTAGTTTGCTATTGTTCCCACT
GmaAffx.77177.1.S1_at	BE023016	At3g14690	1e-59	Metabolism	Cytochrome P450	CYP72A	CCTTTTGTCCAAAACGTGTCAAGCGACGTTCTTGCTCGTGCAGGCTTTGGAAGTAGCTATCAAGAAGGGAAAAAAATATTCGAACTTCAAAGGGAAATGATTCAGCTTACAATGACGCTCTTTAAGTTTGCTTTCATTCCAGGTTACAGGTTTCTGCCAACGCATACCAACAGGAGGATGAAAGCAATTGACAAAGAAATACGAGAATCACTTATGGTAATCATCAACCGAAGATTAAAAGCAATCAAAGCAGGGGAGCCTACTAACAATGACTTGTTAGGCATACTCTTGGAAT
GmaAffx.77799.1.A1_at	BI967949	At4g34240	0.003	Metabolism			GCTCAATTTGTTTTGAAATCTAGCAGTTGTTGATGCATCTTTCGTTCTTTTTTTTTTTTGTACTTTATCATGCTGTGTAGCTTTATTATTATTTTGTGTTTTAGAAGAAAACAAATAAGCGAGAGTATTGTGCATGAAAAAAGCAAAATGATCAATGCTACTTTTCTTCGTGATCGTGTTAGATGTCTTGTGGTTGTAAATTGTA
GmaAffx.8642.1.S1_at	BU545035	At3g15290	1e-100	Metabolism			GGTAGTGATAACCTCCCATGATTATTCAGGCTTCATAGTGAATCGAATCCTTATGCCTATGATAAATGAAGCATTTTTTGCTCTCTACACTGGTGTTGCAACCAAAGAGGATATTGACACAGGAATGAAGCTGGGTACTAACCATCCAATGGGTCCTTTAGAGCTTGCAGACTTCATTGGATTGGATGTGTGCTTGTCAATAATGAGAGTTCTTCATGCTGGCCTTGGTGACAACAAATATGCACCTTGCCCTCTACTTGTGCAGTATGTTGATGCTGGAAGACTTGGAAGAAAACGAGGTATTGGTGTGTATGAATANNGTAAAGATCCAAGGTCTACAAAATCATCTTCCCGTCTCTAAAATGTTTGTTTCACTTGGAAGAACAAGTTTTCAACACC…
GmaAffx.81452.1.S1_at	BF596552	At1g44170	2e-10	Metabolism			ATTCACATTTGAAGCTTTTAGCCACAAAAAAGCAGTTCTATATCGCAGATTTATTGGTGATGCACCAGTAAGGTACCCACCATACACAAATACAAAGATGAGATTGCTGAAAGCTCTCATAGGTGGTGGCATACTTGGTATTATTCGCGCCCTGTTTGGTTGGTGATAGGCTTTAATTTTAATTATATTGGAATTGGAATCTTGATGCTATAGACGGCTTTTAATCTGGCTTCCTTGTATTTTAATCTCCAGTTAATTTTTTTATGTAATACTCATCAACCTTGACTTTTGGATG
Gma.7008.1.S1_at	AW349709	At2g47420	1e-130	Metabolism			AAGGTGGATTCCTCTGTGGTGCGAATTGAGCCCAGGAAACCCCGTATTGAAGTTAAGCAAAAGGAGTGGGATGGGTTTTNNCGGATTTGTTTTAACAGGAAGAACAAAACACTTGGTTCGATATTTANGCAGAAGAGTGTGATCTCCTTGCTTGAAAAAAACTATAGGACTGTGCGGGCACTGGAACTTGGGCAAGAAGATTCACTAAAGGAAGTGGATGCTAAAATGGACTTCTCTAGTTTTGGTGATGATCGAGGTATGGAGATGGATGATNNNGGAGCAGATGATGATGAAATGGAAGTTGAGGATGGGGAAGCAGATGAGGTGCAATCTGAATTCAAGGACAAGGTTTTGGGTGTTCTGAAAGAGGGAGATTTTGAAGAGAAGAGGTCATCCAAG…
Gma.6727.1.S1_at	Y10493.1	At3g26300	1e-103	Metabolism	Cytochrome P450	CYP71B	AGATCCCCAGTATTGGAGTGATGCAGATAGGTTTATCCCAGAGAGATTCAATGACAGTTCTATCGATTTCAAAGGAAATAGCTTTGAGTATATACCTTTTGGGGCAGGAAGGAGAATGTGTCCAGGCATGACATTTGGATTGGCTAGCATTACGCTTCCATTAGCTTTATTACTCTATCATTTTAATTGGGAACTCCCAAATAAGATGAAACCTGAGGATTTGGATATGGATGAACACTTCGGAATGACAGTTGCAAGAAAAAACAAGTTGTTTTTGATTCCCACTGTTTATGAAGCTTCATGATACACGTATTTT
Gma.7310.1.S1_at	BQ630696	At5g54960	1e-117	Metabolism			AAATAAATGTTTGCTTTTCCAGATTTGTATCTGGTCTCGTGTTGCTGACTTGTTGACTTGTTGTAATCATGAACTATTATTGCTTTGTAATAATGTCTTGTATAATGGAATTGTTA
Gma.8074.1.S1_s_at	BE823449	At2g44520	1e-101	Metabolism			TTTACCTCCCTGTGTTTATGTCTGGGCTTTTGATTCACCGTCGTTCTGAAAACGAACAATTCTTAGAAGACAAAGCAAAGGGTTTTGTGAAATCTGCATCCTCTACGGAGTCTTCAGAGTTGGATGATGATAACGGCGATCAAAATATCAAGGCCAGGCGTCCCTATCGGACTGAAGCGCGTCCTCCCGTATCGTATGCCTCTGTTGCACCTTTTCCCTTTTTGCCTGCTCCATCATATAACTTCCCTTGATATCTGTCAGTTATACGGATTTTGTATGACTTCAACATTTTCTCGGCCAAG
Gma.7625.1.S1_s_at	U04526.1	At1g55020	0	Metabolism			GAGGGAGACTCCAAATTGGACTACTGATAAGAAGGCATTAGAAGCTTTCAAAAGGTTTGGAAGCAAACTGACTGGAATTGAAGGAAAAATCAATGCAAGGAACAGTGATCCAAGTCTGAGAAACCGGACTGGGCCAGTTCAGCTGCCATACACTTTGCTCCATCGTTCAAGTGAGGAAGGGTTGACTTTCAAAGGAATTCCCAACAGTATCTCTATCTAATTAAAAAGAGTTTGTGGTTTCCTTATCTATGTTGTACTTCTGAATAACATAGACTTTATGCATGTCTATGCGTAATTATTGCCTGAACTTCTGCACTAT
Gma.6281.1.S1_at	BE658173	At5g42650	6e-87	Metabolism	Cytochrome P450	CYP74A	AGAACGCCGAGGACTTTGTGGCCCACAGGTTCCTTGGCCACGACGGGGAAAAGCTCTTGAGACACGTCTTGTGGTCCAACGGACCCCAGACGGAGGAGCCCACACCGGATGATAAACAGTGTCCCGCCAAGAATCTGGTGGTGCTCATGTGCAGGCTCTACTTGGTGGAATTCTTCCTGCGTTACGACACGTTTACGTTCGATTTTAAACCAGTTGTTCTGGGTCCCGATGTTACCATCAAGTCACTCGCCAAGGCTTCTTCCTTCTGATCCTCCTCATCACCTACTCTACCTCAAACTTAAAATCAATCTTCTTTTTAATGTGTATTAGTTAATTAATAATTAAATAAAACAAAGTAAATATATATATTAAAAGTAGGATGTGCACTGGACAGCACAG…
Gma.6442.2.S1_at	BM270161	At1g52760	1e-34	Metabolism			GCTCACGGAACTTCTGACGGCGTTACCTGCCCNNCNTCNNCCAAGCTGCTGTATGAGAAGGGTTCCAGTGAGGATAAGACGTTGAAGCTCTACGATGGAATGTATCACTCTTTGATTCAGGGAGAGCCCGATGAGTCTGCGAATCTCGTGTTGGGGGACATGAGAGAGTGGATTGATGAGAGGGTTCGACGGTATGGACCTAACAAAAATTCCCAGTGAAACAAACCATTACTAAATTCCTATTTTGGTTCCACATTGNNTATTTTGTGTCTATCAAAACTTTATTAAAGTTGTTATGTGAAGACGGAAGAGTATCCTTCTTCTATCATATTTGGATTTCAATCAAAAATGACATTTAATCAATCCAGTTATCGG
Gma.6545.1.S1_s_at	BQ627693	At3g09820	1e-156	Metabolism			GGATTTCTTTCACAATTGGTTAAGCATAAGCCCATTGAAGAATGCATTAGAGCTGGGTGTTATGCAGCCAATGTTATCATCCAAAGGCCTGGCTGCACATACCCACCGACGCCTGATTTTCATTGAGTGATTCCTCTTTTTCTGTTACTGCTATGAATTTTTTTCTTTTTATCATTGAGAAGGATTTTAATAGCCACACTCTAACTGGTGTGGGGTTTTTTAACCCCCCGNCTAGGGAAAACANCGTGAAAAAGTTGCAGNAANNGAGATAAAACTTGAATAAGTTCATATATTTGAAGTCCGATCA
Gma.6570.1.S1_at	AW350797	At1g30620	0	Metabolism	Galactose Metabolism		GCAAAAAGCTCATCGTAACGGTTACGGTATTTCATCTGCAATCTGAGTTTCTAGCCATTCAGCCAAGCAGTTGGCCATCAACTGCTCTTTTACATGGTGCTCAGGATTTTTTTTTTNCTTTTTCTTTTTGGTCGTCCTTAGGGAGTTTGGTAGTTGATTCGTTATACTTACATGTGTATTCAACATACAATGAGTCAATAATAATAAATAATATAATGCCCAGCCTCTGGTTGGT
Gma.6570.1.S1_s_at	AW350797	At1g30620	0	Metabolism	Galactose Metabolism		CAAAGTAGACTACCTTCCACGTCGACCCGGCGATTATGCCGAGGTGTATAGTGACCCTTCTAAGATCAACAGGGAACTGAATTGGACCGCACAATACACTGACCTTGAGAAGAGTTTGCAGGTTGCATGGAAATGGCAAAAAGCTCATCGTAACGGTTACGGTATTTCATCTGCAATCTGAGTTTCTAGCCATTCAGCCAAGCAGTTGGCCATCAACTGCTCTTTTACATGGTGCTCAGGATTTTTTTTTTNCTTTTTCTTTTTGGTCGTCCTTAGGGAGTTTGGTAGTTGATTCGTTATACTTACATGTGTATTCAACATACAATGAGTCAA
Gma.6602.2.S1_s_at	BI320883	At3g02780	1e-94	Metabolism			AAGTATGAGTTGCTTCTTCAGCAACGATCTGCAACCAAGGTAACATTCCCTCTTGTGTGGACAAACACCTGTTGCAGCCATCCACTGTACCGTGAATCTGAGCTTATTGATGAGAATGCCCTTGGAGTAAGAAATGCAGCTCAGAGGAAGCTTTTGGATGAGCTTGGTATTGTTGCTGAAGATGTACCAGTTGATCAGTTCACCCCATTGGGTCGCATTCTTTACAAGGCACCTTCTGATGGCAAATGGGGAGAGCATGAACTGGACTATCTGCTTTTCATTGTCCGGGATGTTAACGTGAACCCCAATCCTGACGAAGTGGCTGATATCAAATATGTGA
Gma.6550.1.A1_at	CD402638	At5g54160	2e-31	Metabolism			TGAGGCACTTCCAGACAATGGGAAGGTAATTGTGGCAGAATGCATTCTTCCAGTGGCTCCAGACTCTAGCTTGGCCACAAAAGGTGTGGTTCACANTCGANTGTGATCATGTTGGCACATAATCCAGGTGGGAAAGAGAGNACAGAGNNAGAGTTTGAGGCTCTGGCCAAAGGGTCTGGATTCCAAGGTTTCCGAGTCCTGTGCTGTGCTTTCAANACCTACGTCATGGAGTTTCTCAAAAAGGTTTAAGTTCTTTGGCGTGGATTCATAAGTTGCATTTGAGTTTTGACTTTGAGACTCTGCATGTGGTGCTACTTACAAAAGCTTTCCCGGAAAAATGTAAATTTCTCTTAATTCATTAGGAAAAGAATAATAAACAAGTTCAATGTATACTGCCTT…
Gma.6551.1.S1_s_at	BM527540	At4g20870	9e-24	Metabolism			CAAAGTCTGATGTGCCCAAAAGTCTNAAGAAATATCACTTNAATCATCATTATCGGCTCCAGAACTATGGCTTTGGGATCACNTCACCNCTGTGGGATAAAGTTTTTGGAACGGTTCCTCCTCCTCAATCAAANGGGGATGCCAAACGTAGATAAGTTACTGTCAAGGTTGCATTTGTTCATTGGTTAAGNATAGTTCATTCAGGAGCTTCANACGAGATNTGTTGATAATTNCATTATTCATGTCTTGNTTGTCTAATTATTTTGCTCCNCAATTGATGTTTCTGAGGGTTAACGTGCCACCATCTTGTGTCAAA
Gma.4839.1.A1_at	AW310019	At5g57850	6e-09	Metabolism			TCATCGTCTGGGATGATCAACCCATTGGCAATGGAAGGGTGGGAGAATTAACAATGTTACTTTCGGATATGCTTTGGGATGATATGGTAGCTGGCCCTGGCACACAGAGGATACCTGTTCCTTATGTTGAGTAAACCTACAAAGTCATCAAATTACAGGCTGGGAACAACTTTCTTACTTTTCTATGTCATGTTCNTAGGAGTTCTCCTTGCAAAGATTTATCAAGAGGTTTCTCTTTGTATTTGCTTTTTGTATTTCNAAGTGTGAACACTGAACAAGTCCTTAAGTGAAGCACCAGGTGTTTCCTGCAACACAAAATTNACGTAGCAGATAAATAGTCCTTGAACTGTTTCACGTTGTTG
Gma.4839.2.S1_at	BI974385	At5g57850	2e-58	Metabolism			TCTCTTCATCATCCGAGTTGCTTGAAAAGCTTCATGAAAAATGGAGTTCAGTGGAGAAACCACCATACCCAGCTATGTATTCTAGTATTTATGGAGGTATCATACTTGATCCAGCAATGATGGTAATCCCCATTGATGATCACATGGTTCACAGAGGGCATGGTGTGTTTGATACAGCTATTGTTCTAGATGGATACCTCTATGAGTTGGATGTTCACCTTGACAGATTCCTAAGTTCAGCCTCCAAAGCAAAGATATCCTCTCCCTTTTCTCGATCAGTGCTTCACAGCATTCTAATACAACTAACTGCAGCATCAAAATGCAAGAAGGGAACTCTAAGATACTGGCTCAGTGCAGGTCCTGGAGATTTCTTGCTATCATCAGCAGGATGTCCAACAT…
Gma.5046.1.S1_s_at	L43921.1	At3g12120	1e-147	Metabolism			TTATGGAATCCTGAACAAGGTCTTCCATAATATTACAGACACTCATGTAGCNCATCACTTGTTCTCCACAATGCCACATTATCATGCAATGGAGGCNACAAAGGCAATAAANCCCATNTTGGGAGAGTATTATCGGTTTGATGNGACTCCATTTGTCAAGGCAATGTGGAGAGAGGCAAGAGAGTGTATTTATGTGGAGCCAGATCAAAGTACNNAGAGCAAAGGTGTATTTTGGTACAACAATAAGTTGTGATGATTAATGTAGCCGNGGNCTTCTTNNNNNNNNNNNNNNNNNNNNTGAACTTTCCNTTGTGACTGTTTAGTATCATGNTTGCTTATTGGGAATAATTTTGTTGAACCCTGATGTTGGTAGTAAGTATCTA
Gma.5093.1.S1_at	AF244518.1	At1g74960	0	Metabolism	Fatty Acid Biosynthesis		GGGTCACAATTCTTCAATCATATTTNGCACCATACTAGTGAAACAGATTTCAGAGCAGTACTTTCTTATTATTATAAGTTACTGAGTACCCAGACAATGTTTATTGCATACTAACTCCAGTGTTTTGGTTGGTTGAGAATATATGCGGTGTGGATTAGTTGGTTGGATCAGTAACTGTTGAGAAACATTGTTTTTTGGGATGGGGTTGGTTGTGTGCCTACNGAATCAGAGTGTTGATAGATTATCATTATCTGGTGCTCCTGGTGGGAGAGAGTGAGTCGCTATCTATCCACTACCATNAAATCCTATCTTTACCATGAATGGNCTAGAGTAGGNAGTTGACCCACTTTTGATGTAACCGTTTAACAACCATTTTGATGGGATGGATACAGTCTTTTG…
Gma.4589.2.S1_at	BI943736	At1g76490	1e-165	Metabolism			TGTTGTGTGTTATCCTCTTGTTTAAGGCTACTGCTTCAATAATGTGGTACTTTAGAGGGTAGTGTTTTTACGTGTTGTAATCTCCATCTTGTTGATTTGTAATTGTAGCAAGAGATGTCTCCAATTAGGATGTAGAGTTGTTAATAATAACAGTCTCTGGTTGCTCA
Gma.4374.2.S1_x_at	BQ454274	At2g45570	2e-65	Metabolism	Cytochrome P450	CYP76C	GAGCTATTGCCATTTGGTGCTGGGAGAAGGATGNGCCCTGGCTACCCTCTTGGCCTTAAGGTCATTCAAGCAAGTTTGGCCAATTTGTTGCATGGATTTAACTGGAGACTGCCTGATAATGTCAAGAATGAGGATTTGAATATGGATGAGATTTTTGGGCTCTCTACACCTAAGAAAATACCACTGGAAACTGTTGTTGAGCCTAGGCTTCCACACCATCTTTATTCTCTCTGAGCAGTGCCCTTGCACAAAGGGTTTCTCTCTAATAAGATTGCTGTAGGAATAAAATGGGTCTTGTGTGAGCTTATGTTTGTCACACTGGATTGCAATGAATTTTTCTTTCTTNCTCATNNNANNNTTATAAANAATAAAATAAAAATGATGTTGTGGTGTTAGAAT…
Gma.4375.2.S1_at	BQ080891	At5g37600	2e-95	Metabolism			GATCAAAACCGCCATTGAGAAGTTGGGGAAGAGACACAAGGAGCACATTGCTGCTTATGGAGAAGGCAACGAGCGTCGTTTGACAGGGCGCCACGAAACCGCTGACATCAACACCTTCTTATGGGGAGTTGCAAACCGTGGAGCTTCAGTTAGGGTTGGGAGGGACACAGAGAAAGCAGGGAAGGGATATTTTGAGGACAGAAGGCCAGCTTCTAACATGGACCCATATGTGGTTACTTCCATGATTGCAGACACAACCATTCTGTGGAAGCCATGAGCAAAACTTGCATGTTGTCTCCCTTTGGATGGAACAAGGAACAAGGAACAAGGAACAAGGAACAGTTATGCTTTTCTAAGTAGGGTTTGGTCCTTTTTATTTTTTACCTTTTGATTTTTCTA…
Gma.4425.2.S1_at	BF068497	At5g01410	7e-40	Metabolism			GATTTGTTGCTATGTGGCGTTTCAATCTAGATTATGGGTTTGCTAGTGTTTTTAGTTGTTTCTTATAATAAGGTTATGTTTTTTTTTTTTTTTGTGTTTTGAACCGTGTTAATTGGATTTAGAAAAACCAAAAAAAAAAAAAAATAGATAGATGACTATTTGGGCATGCCTTGTAATATGCTGATACTTGTTTTTACTACATATCCAGCGTCGTGGTGGTATTGTGTTGAGTTAGTGCGTTCGTCCTTAAGTAGAATCGAATCATTCTTGTTTCTGGATATTCAATCCTAATTTTCATTTTTGGGGTCAATTTTTTTTATTGGATTCAGAATCTCTTATTTCCANCTACTTGTTCTAGTTTGAACGAGTGTGATTTGAAATTGACAATTTTTGTGTCCG…
Gma.4325.1.S1_s_at	CD409538	At1g06550	3e-56	Metabolism			ATTCCTCCAAAAATGTCATGGATTTCTCTACTTTCTGGTATGCATTAATCCAGGCTACTGTTCTGAGTTCTTGAATAAACTTCAACATATGAAAGAAGTTCATGAAGAGTCCTCTAAGTTTGTTGTTGCTA
Gma.5478.1.S1_at	AW350606	At4g34135	1e-132	Metabolism			CAAGTGCTAATTCTGGACCATCAAGCTGTGGGAGCCTTTGTCACACACTGTGGATGGAATTCCACGCTCGAAGCAGTGTCGGCGGGGGTCCCCATGCTCACCTGGCCCGTCTCTGCAGAGCAATTCTACAATGAAAAGTTTGTGACCGATATACTTCAAATCGGGGTCCCTGTTGGTGTTAAAAAATGGAATAGAATTGTGGGGGACAACATAACCAGTAACGCGCTTCAGAAGGCACTCCATCGTATAATGATAGGGGAAGAAGCAGAGCCTATGAGAAACAGAGCACACAAACTGGCGCAAATGGCAACAACGGCGCTCCAACACAATGGATCATCTTACTGCCACTTCACTCATTTGATACAACACCTTCGCTCCATTGCAAGCCTTCAAAATTAA…
Gma.5513.1.S1_s_at	AW310453	At5g02230	1e-111	Metabolism			CTTGCTGTGGAGACATCTGTGACTGCTTAGATCATTGATGAACAAAAAAATAAAATAAAAAAANTAAGAAAAAGAGAGAGAAAGAGAGAAGTCCTTTGTGAATTTCCCGAGTTGGGATGTAGTAATTGTATGTAGTTGATGTAGATGCTTTGATCATATTACAATTAT
Gma.5529.1.S1_at	AW432588	At1g59950	7e-95	Metabolism			TAAGTCAAATCAGCCAGAGCCGTTTGATCAGCGGACCCACCAAACCACAACTCGCTGATCTCTGGGATGATCAAATATAAACTATTTACTACTATGCAGCTCCCACTCTATTTTTATAATCCATCTTTTTACCTCTTGTTTCATTTTACGTTTAAATAATTCATGCCATGCCACTTCTTATTTTAGATTTCACAATCAATAAACTAGGCACGCGCGGCACATGATATGAA
Gma.5578.3.S1_at	AW310572	At2g40890	9e-24	Metabolism	Cytochrome P450	CYP98A	GAAAATTGCCTTGTGTCTATGTAACTACATTTGAAATGGCAATTCAAGGAACTAAGGAAAAACCCATAGCGAGTTTGGCTTCTCCTCTTCAGATTTTGGATTGAAATTCCTGTTTAAGATTAATT
Gma.5150.4.S1_a_at	BM887549	At1g64440	9e-35	Metabolism	Galactose Metabolism		GAAGAGTTCCCTCTGTCAGCAATGAACCCATATGGACGAACTAAGCTTATCATTGAAGAAATTTGTCGTGATGTCCACCGTGCAGAGCCAGATTGGAAAATAATATTGTTTTTATACTTCAACCCAGTCGGTGCACACCGTAGTCCGTAGGTCTTGTGAATTTAGTTT
Gma.5803.1.S1_a_at	BU084390	At5g03630	1e-114	Metabolism			GGTCTTTCTGGAAGGTGGAACTCCTGAAGANAACCAGGCTATTGCTAAAGTTGCTAAGGTCCAGCCTCCGGTTGCGGATGTAAATCAACTTGCTAAGGAAGGCCTTTCCTTTGCTAGTAAAATATAATGG
Gma.5803.1.S1_at	BU084390	At5g03630	1e-114	Metabolism			GAAGGCCATCAAGGCAGCTGAGGAAGGAANAACAGTTGAGGAGTATGATTACCTTCCATACTTCTATTCCCGTTCATTNGATCTGTCTTGGCAATTCTATGGCGACAATGTCGGCGACACAGTNCTATTCGGAGACAACAATCCTGCGTCNTCAAAGCCNAAGTTTGGGACATACTGGATTAAAGANGGGAAAGTTGTNGGGGTCTTTCTGGAAGGTGGAACTCCTGAAGANAACCAGGCTATTGCTAAAGTTGCTAAGGTCCAGCCTCCGGTTGCGGATGTAAATCAACTTGCTAAGGAAGGCCTTTCCTTTGCTAGTAAAATATAATGGTTTTATTTGGGAAGGATAAAGATGCTTGGTGGTTTGCATAGATTGTATCTGACAGGCTTTATTTTACT…
Gma.5790.1.S1_a_at	BU549012	At5g23670	0	Metabolism			GATCCATATAATTGTTCTCAGATTCAAGTGAACGTCTCTTGGAGGGAAGTCTGTTCTTATTTTGCCCAGTCATTAGATA
Gma.2354.2.S1_at	CA819143	At1g74040	0	Metabolism			GTTGTTTCCAGTGTCAAGGCCTATATTGCTGCACTAAACAAGATGTNGGGTTTCAAGGAANCNTCTCNATCTGCTGAAAAAATTNCANTTTCTTCATTGAAGATTTGAGAATTNTGTGNTGCTNCTTTGGTAACANTTGTTTGTGTTNAACCACNAAGAGGAAGACAANGTTGCAGCAGCATTCTTGGCTCTCGCAGGTCTCCATATTTAAGGTGTCGTCCCTGTGTTTTGACCGGAATGTATTTGCAGTCAGGAATTTATTGATTCACCCAAGTAGCCTTAGCAAAGAATGTAACGTAAGTCCATTTTGAATATTCAGACTACAGGGATTCTTTCCCTTTTNATTTTATAGGGTGCCCTTTATTTGAAATTATNAAATGTCCTTNAAGATTAGAGTGT…
Gma.2434.2.S1_at	AW310370	At5g16450	2e-36	Metabolism			GATTTCAATTCATGCAAGGACTATATTTATGGGCAGCACAGGATCTAGTGTAGTGCTTTCGGTACTTGTGTTCTTGACCCGGTTCCTCGCTTCCACAAAATTATAACCGATAGAATCCCCTTGATAATCAAAGTAGGTTGGAGTGTTTGTCCATTTCATACCAACATTATCTCTGTTTTGAATTACTGTCACGAAAGCTTGTTTTTCCCCCATATATTAAGTTAATGGTTGTCTGTTATTAAGTTTGGAGAGATATAAGTCATAAGTGCAAAGTATACACATCCATATTTTGACCAGATGATCTTATTGTAGTTGCATAAGATGTTGCGGTCTAGA
Gma.2141.1.S1_at	CD406772	At2g36790	3e-28	Metabolism			ACGTGGCCTCTGTTTGCGGAGCATTTTTTCAACGAGAAGCTGGTGGTGGATGTGTTGAAGATTGGGGTGCCGGTGGGGGCGAAAGAGTGGAGGAACTGGAACGAGTTTGGGAGTGAGGTGGTGAAACGGGAGGAGATTGGAAACGCGATTGCTTCGTTGATGAGTGAGGAAGAAGAAGATGGAGGAATGAGGAAGAGAGCCAAGGAGCTAAGCGTTGCGGCGAAGAGTGCTATAAAGGTTGGTGGATCTTCGCACAACAACATGAAGGAATTGATTCGGGAGCTCAAGGAGATCAAGCTTTCCAAGGAGGCTCAAGAGACCGCACCCAATCCTTAAGACTGGTTCTGCTTTTCCATCTTTTGAACAAG
Gma.2281.1.S1_at	BI317540	At1g54580	9e-27	Metabolism			GAGTCTCGAGTGTTTTAGTTGTGAACTCTGTTGNNNCGTGATTAAANCAAGTCTGAGAAGAAAAACAAATTAGTCCAACCTTTTGTTTGTTTCTGGAAGTTAGTTATATNAAGTTGTGTTTTTGCNTTAANGGGTTTTTGTCAATGATATGNTAATTTTAATAGATGTAGATTTATGTCAATGATATTGTATGTTAATTTTATTCAGTCTCGTATCTAGCTGAATAATTAAGAATTATACTACGTCATGCCTATAACACTTGAGGTGCTTAAA
Gma.2281.1.S1_x_at	BI317540	At1g54580	9e-27	Metabolism			ATGCCGATCAATATTTATGGTGTGGGGNCAATTNNGAGTCTCGAGTGTTTTAGTTGTGAACTCTGTTGNNNCGTGATTAAANCAAGTCTGAGAAGAAAAACAAATTAGTCCAACCTTTTGTTTGTTTCTGGAAGTTAGTTATATNAAGTTGTGTTTTTGCNTTAANGGGTTTTTGTCAATGATATGNTAATTTTAATAGATGTAGATTTATGTCAATGATATTGTATGTTAATTTTATTCAGTCTCGTATCTAGCTGAATAATTAAGAATTATACTACGTCATGCCTATAACACTTGAGGTGCTTAAA
Gma.2313.1.S1_at	AF452454.1	At3g22890	0	Metabolism			GATGGAAGGTGCTGGTTGATTACTATGATAGCTTAGTACTCTCAAGCAACGGCAAAGTGCAGGAAGCTGTTCCAGCTTAATCTTGTATCATATCATAATGTATATATCTCATGATTGGGAGAAACCTTAAGCTTATGTATTCTCCTGCTAAGACATACTTCACGAGGATCCTCTGGCCCAATCTAATAATAATAATAAATTAAAACTTTGGGGAGGCACAAGCACGGACACATTG
Gma.2313.1.S1_s_at	AF452454.1	At3g22890	0	Metabolism			AGCGTCTAAACATTCTTCCTTTCAGGGTTGCTGCATATGACAAGACTCAGGGTAAAATGGCATTCTTTGACCCTTCAAGGCCTCAGGACTTCCTGTTCATATCAGGCACAAAGATGCGCACACTGGCAAGGAACAAAGAAAGTCCTCCTGATGGATTTATGTGCCCTGGTGGATGGAAGGTGCTGGTTGATTACTATGATAGCTTAGTACTCTCAAGCAACGGCAAAGTGCAGGAAGCTGTTCCAGCTTAATCTTGTATCATATCATAATGTATATATCTCATGATTGGGAGAAACCTTAAGCTTATGTATTCTCCTGCTAAGACATACTTCACGAGGATCCTCTGGCCCAATCTAATAATAATAATAAATTAAAACTTTGGGGAGGCACAAGCACGGA…
Gma.3046.1.S1_at	BQ741319	At4g12110	2e-89	Metabolism	Lipid Biosynthesis/Metabolism		GTGGTTTCAGAATGCGTTGCCTGTTGACTNTTTNGGAACCNACCAAAATTCTTGTAGACATATATATATATATATATATCTGCTGTGGCAAAATAGATGTCTTTGGTTAGCTTCAGGGTGGAGATTAGTAGAATGGAGCTTTACAATTTGTGGTTTTGTGTTGGAAGAGGAGGGGGGCACGGGAGGAATTTCTTCTGTTGTCATGTTCTGGAATTCAAACATTTTGGTTTTGGTTCATGTCTGTCAGAATGTTCCTTCTCCTATGGATTGTAAATTCAGAATCTTCTATTGTCATGTTCTGGAATTCAAACATTTTGGTTTGGGTTCATGTCTGCCAGAATGTTCCTTCCCCAGTGGGTTGTAAACTCAGAAATATGTAATAGGCTTCCTCGGCTGGGA…
Gma.2854.2.S1_a_at	D86930.1	At2g26230	1e-118	Metabolism			AGCACTTCCTGATACCCGTGAAAGGATGGTAGCAACAGAAGTAACCGCACTGTGGAGGTATTCGTATGAATCGCTGTATAGCCTCCCTCAGAAGCCGCTTTACTTTACAGAAAAGTATCAGGAAGTGAAAAAAGTTCTGGCTGACACTTTTTTTGGCCCACCAAAAGGGGGAGTCTATAGCCCATCTGTTCAAAACACACTCTACCTGATGGCAAAGGCCACACTGAACAGNTTTCCTGACATAGCTTATGTCAGTCTAAAGTTGCCAAATCTTCATTTCATACCTGTCAATATCTCAAACCAGGATGGCCCTATTGTGAAGTTTGAGGATGATGTGTACTTGCCAACGGATGAGCCACATGGGTCAATTCAAGCTAGTTTGAGCCGCCTTTGGTCAAA…
Gma.3168.1.S1_at	CA819733	At5g54500	7e-92	Metabolism			TGAAAGGTGGAAGTCCATATGGTGCNGGAACTTANGCCGGTGANGGCTCAAGACAGCCAAGTGAGCTNGAGTTACANCAAGCATTCCACCAAGGNAAGTACATTGCNGGCATCACAAAGAAGCTCAAGCAAGCTGCATAATGTTNGCCTTNCNTNNATATNAGATNATACTATTATTATTAAACCATACCACAATATTGCTTGAAAATCATTNNCNANTTTTTAGNCTTGAAATATATTGAGTTTTNTTTTNCTGNGCTTGCAAGTATTTTTTTTTTNCTTTNCTAATCTTNGTNAAGGAAATGCTTTGTANGAGTGTTACATGTTGCAGTGGATGTTGCAATTTGTTGAATGAGGAAAGTTTGTGNNTNTNGTCCTTTNGTGTTANGCNGAAACANTA…
Gma.3190.1.S1_at	CD396812	At1g65290	1e-42	Metabolism	Fatty Acid Biosynthesis		CAGAATGACCTTGGATTGGATAGTTTAGATTCNGTAGAGATNGTGATGGCTCTTGAGGANGAGTTTGGGTTCGAGATTCCTGATAATGAGGCAGACAAGATCAACTCCATTAAACTTGCAGTGGACTTCATTGCATCTCATCCTCAGGCAAAGTAGTGGAATTCNNNNNNNNNNNNNNTTTTGTTTCTCAACATCTAGTTTAGATGANNCATCNGACATTTTTGCTTCCANAGTGGAACTTTGTTTTCTCATCCCTCAGAAGNGTGTTAGCTGGGGATGTGCCAGCTTCATTTGGCGGTATTGGCATCCAGAACTTCACATTCTGTGTTCCTCCTATATTCGTGTCAATAAGAATTGTGTTAAATTTCCGATTATGAAATTGTGAGGTCTTGAGTTGTC…
Gma.2750.1.S1_at	AW349237	At4g33510	0	Metabolism	Amino Acid Biosynthesis/Metabolism		TCTGGACTTAAAACCCGCTCTTTTGATGCAATAAGGGCTGAGCTGAGGGCATTCTTTGATGTGCATGATCAAGAAGGAAGCTACCCAGGAGGGGTTCATTTAGAGATGACAGGGCAGAACGTGACAGAATGTGTTGGAGGCTCAAGGACTATTACTTATGATGACTTGAGCTCACGCTACCACACACATTGTGATCCAAGGCTTAATGCTTCTCAATCTCTCGAGCTTGCATTTAATATTGCGGACAGGTTGCGCAAGAGAAGGCTCAATTCAACTCGATCACTTGGAATTTAGACAAGAGGGGGTCTGTCTTCCTTTGTACCTGGATCACAATACTGGTCAAACATGTGTTGAGTTTTCTTGAGCACAGTGAACAAATACTCTACTGGGAGCCACTCT…
Gma.3643.1.S1_at	CA936445	At1g43710	0	Metabolism			AATGCTCTTGCCAGGGATGTGGAATACCTTGCTTCTAGGGATGCCACNATCATGGGTAGTCGGAATGGCCATGCTCCCATATTCCTNTGGTATACCTTGAATCGGAAAGGATATAGAGGTTTTCAGAAAGAAGTACAGAAATGCTTGCGAAATGCNCACTACTTCAAAGGCCGCCTTGTTGAGGCTGGGATTGGTGCAATGCTTAATGAACTGAGCAGCACGGTTGTGTTTGAGAGGCCACATGATGAGGAATTTATACGCAAGTGGCAGTTAGCATGCAAGGGGAATATCGCACATGTGGTGGTGATGCCAAACATCACTATTGAGAAGCTTGATGATTTTCTGAACGAGCTTCTGGAGAAGCGTGCTACCTGGTTTCAAGATGGCAAGGATCAACCC…
Gma.3717.1.S1_a_at	AW350536	At1g01710	1e-160	Metabolism			GTGCTGTGAGTCTGGACCACTCCATGTGGTTTCACAGACCTTTACGAGCTGATGACTGGATACTATTTGTGATCTTTAGTCCTACTGCCAATAATGCACGTGGCTATGTCACTGGCCAAATGTTCAATCAGAAGGGAGAGCTACTTGTATCAGTGGTTCAAGAAGGTGTAATGAGGGAAGTTATTTCTGC
Gma.358.1.S1_at	AW310270	At3g48690	1e-65	Metabolism			AATTGGATCGGAACCTGTTGCAGGGCACCAACAGAGCGTGCCCTATTTGGTATGGGATTTTGTTTATCCATCTGCGCCTGGAGGGATTGACAACCCTATGATCAATCCAATGGTTACTGGGGCGCCTAGCTTGGCTGGACTTGGGTGTTCTAAGATTCTGGTTTGCGTTGCTGAAAAGGATCTGATAAAGGATAGAGGGGTTGCGTACTATGAGGCTGTGAAGAAGAGTGGCTGGCAAGGTGAAGCGGAACTGTTCGAAGTGGAGGGCGAGGATCATGCTTTCCACATCCACAATCCACAAACCCAGAATGCCATGAAAATGATCAAACGCCTCTCGGATTTTCTCCTCCACTAAAACACATACCCTGAGGATTCTGAGTTTTAATGTCTCATGGATGT…
Gma.3518.1.S1_at	AF301590.1	At5g37600	0	Metabolism			TCAAAGCAGCAATTGACAAGTTGGGGAAGAAGCACAAGGAGCACATTGCTGCTTATGGAGAAGGCAACGAACGTCGTTTGACAGGACGCCACGAAACCGCTGACATCAACACCTTCTTATGGGGAGTTGCAAACCGTGGAGCTTCTGTTAGGGTTGGGAGAGACACAGAGAAAGCAGGGAAGGGATATTTTGAGGACAGAAGGCCAGCTTCCAACATGGACCCATACGTGGTTACTTCCATGATTGCAGACACAACCATTCTGTGGAAGCCATGAGCAAAACCTGCATGTTTTCTCCCTTTGGATGGAAAGGAACAGTTATGCTTTTCTTAGTAGGATTTGGTCTCTCTCTCTTTTTACCTTTTGATTGGTACTATGGTT
Gma.3371.1.S1_at	BQ454173	At5g53120	3e-05	Metabolism			TTGCCTGCGTTCCTGAAGAGAGAAGTGAGCCTGCTGCGTGATCTCTCCCTTCAGTAGCATAGCAATGCATGATTGCTATTGTAACCTCTAAATAAGCTATATTGACTACATTGTCATTGACAAGTGTGGGAGAAATAGGAATCTTGTGTGATTAATTTTAGGTTTTCCCATTCTGTGTGTGGAGTCTGATTAGCTATGTTAATCTTAGTCGATTTCGGATGGCTTTCTCTTGTAAGACGCGTATTGCCAATTATT
Gma.3881.1.S1_s_at	X92437.1	At2g30490	0	Metabolism	Cytochrome P450	CYP73A	TTAGACTCCACCACATGATCATGATCATATGATCAATCCCCTTAATTTTTTCTTTTTTCTTTTCCCTTTTCTTTACTCTGTATTGTATCAATGCTTGAAAATGGGGTTGTTCCAAAAATGTCATATATATTTGGCCTGCTAATGGGTATTGTAAATCTCTGAACTTGAAGTGATGCACGGTTTTGAGATGGTTTTCTAAT
Gma.3881.2.S1_at	AW349366	At2g30490	6e-82	Metabolism	Cytochrome P450	CYP73A	TGCGAAGCTTGGTGGCTATGACATCCCAGCAGAGAGCAAGATATTGGTGAATGCATGGTGGCTGGCCAACAACCCTGCACACTGGAAGAAGCCAGAGGAGTTCCGGCCAGAGAGGTTCTTGGAGGAGGAATTGCATGTGGAAGCCAATGGCAATGACTTTAGGTACCTTCCCTTTGGGGTTGGCAGAAGGAGTTGCCCCGGAATCATTCTTGCA
Gma.4030.1.S1_at	CD414923	At3g14680	6e-92	Metabolism	Cytochrome P450	CYP72A	AATTTATTTTGCTCGAGCGATCAAGAATGATGTGAAACTTGGAAACCTTTCCCTACCTGCGGGAGTGCAAGTTTCCTTACCAATACTATTGATTCACCAGGATCGTGATATTTGGGGTGATGATGCTACAGAGTTCAACCCAGAAAGATTTGCTGAAGGAGTAGCAAAGGCAACAAAAGGCCAAGTTGTGTTTTTCCCATTTGGATGGGGTCCTAGAGTGTGCTTAGGCCAAAATTTTGCTTTATTAGAAGCGAAGTTGGTTTTGTCATTACTCTTACAACGCTTCTCATTTGAGCTTTCTCCTACCTATGCACATGCTCCAGTCACTGTGCTCACTCTTAATCCAAAATTTGGTGCTCATATCATCTTACA
Gma.3956.1.S1_x_at	BE659401	At3g43190	0	Metabolism	Sucrose Biosynthesis		GGCAAATTTACTCGGACAGGCTCTTGACACTCACTGGTGTGTATGGCTTCTGGAAGCACGTGACCAATCTTGAACGCCGTGAGAGCAAACGTTACCTCGAGATGTTCTATGCTCTCAAGTACCGCAAATTGGCTGAGTCTGTGCCCCTTGCTATTGAAGAGTAAATTCATGTTTGAAGAGAACATCAATGGAGAAACCGGCTTTTGGTCGTTTGAAGTCTTATGGAGCTTTCATAAATAACGCCATTGATTTTGATTGTGATCAGCTTTTGGATTTAAAGAGTCTAAAAAAAAGTGTCGTTTGTTTTTATATTTTGCTTAGGTTTTGGGTAAAAAAAGTAAAAAAAGAAAGTCTTTTTTTTTTNNNNAAATTCTTTTTGTTGTTGCAATATTGTGTATG…
Gma.4096.1.S1_at	BG508949	At4g14880	1e-121	Metabolism			GAAAGTCCAATACTGTCTGGAGGAAAACCTGGCCCTCATAAGATCCAAGGAATTGGTGCTGGCTTCATCCCTGGTGTTCTGGATGTCGATTTACTTGATGAAGTTGTTCAAATTTCAAGTGAAGAAGCCATTGAAACTGCTAAACTTCTTGCTTTGAAAGAAGGTTTGCTGGTGGGAATATCATCTGGTGCAGCTGCAGCTGCTGCAATTAAGATAGCAAAGAGGCCAGAAAATGCTGGAAAACTCATTATTGCGGTCTTCCCAAGCTTTGGAGAGCGTTATTTATCATCTGTGCTCTTTGAATCCGTGAAGCGAGAAGCAGAGAGCATGGTCTTCGAGCCTTGAATA
Gma.4097.1.S1_at	AW350249	At1g77120	1e-179	Metabolism			GATTAACAAGGCTTTTGATTACATGCTGAAAGGGGAGTCCATCAGATGCATCATTCG
Gma.4206.1.S1_s_at	AF195798.1	At4g15350	2e-74	Metabolism	Cytochrome P450	CYP705A	CGTCCCGAGAGGTTCTTAGAAACTGGTGCTGAAGGGGAAGCAGGGCCTCTTGATCTTAGGGGCCAGCATTTCCAACTCCTCCCATTTGGGTCTGGGAGGAGAATGTGCCCTGGTGTCAATTTGGCTACTTCAGGAATGGCAACACTTCTTGCATCTCTTATCCAATGCTTTGACCTGCAAGTGCTGGGCCCTCAAGGACAAATATTGAAAGGTGATGATGCCAAAGTTAGCATGGAAGAGAGAGCTGGCCTCACAGTTCCAAGGGCACATAGTCTCGTTTGTGTTCCACTTGCAAGGATCGGCGTTGCATCTAAACTCCTTTCTTAATTAAGATAATCATCATATACAATAGTAGTGTCTTGCCATCGCAGTTGCTTTTTATGTATTCATAATCATCAT…
Gma.4269.1.S1_at	CD407626	At1g27450	7e-82	Metabolism			CATAGATGATCTTATTGCCACTGGGGGAACGTTAGGTGCTGCAATTAAGCTTCTAGAACGTGTTGGGGTGCATGTTGTGGAGTGTGCTTGTGTGATTGAATTGCCAGAGTTAAAGGGGCGGGAAAGGTTGGGAGACAAGTCGCTATTTGTCTTGATTAATGGGGGAGCCTGATCTTTTTTCCAAGTGATTGTGTTTTTATTAGCTGGCTCTTGTTAGGAGCTTTATTGATGACTGCTTAGATTTCCTTAAGATANATTTTGATGCTGCGGAAACGGAAAGCGTGCTTTGTTTGAGCGCGCTCAGTTCTGCTCAATTATTATTATTATTATNNNCTTCTGTGAGTCCCGTTTGGTAATGACGATTGAGAGAACGATGNCTATAATATAGGACTTGCTTGC…
Gma.16697.1.S1_s_at	BQ627551	At4g27070	3e-24	Metabolism	Amino Acid Biosynthesis/Metabolism	Tryptophan Biosynthesis	TATCTAGAGAAAGTGTGTCCAACCCTTGCTAATGGAGCCAAGGTTGTGGTTAACTTCAGTGGCCGGGGTGATAAGGATGTTCAAACTGCTATCAAGTACTTGAAGCTTTGAAAGGATCAAAACTTGCTGAGTGAGCTTCATTTTCATACTTAGAGACATAATTAATACAATTTATTATTAGACCAAGTTAAATAGTCATGTATATTTGCATCAGAGAACTGTTGCTATTCAATCCTCAAT
Gma.15918.1.S1_s_at	BM519864	At2g16570	1e-109	Metabolism			TTGTTTCTCTGGGAATTACCCTGTGGAGCCNAGAGAGCTTAANGTGAAGAGGGTTGGGGACTTTGTTGATGATGGCTTGAATGGNAGCTTGGAGTCTATTGATGGTGGTTGGGTTCAGGCAAACCNAAATCAAATCAAGNTTGGTACTGGTACTAGTACTAGTATTTCATAATANTCCTATATCTGGTTTTTGCAGCATAAGGCATCCCTCAGTGGACAAAAATCAGATGCAGTTCTTCAGGTGTTTTTGGTGTTGTTCT
Gma.16174.1.S1_at	AW309513	At4g14880	1e-13	Metabolism			GTTTTGGAGAGCGTTATCTATCGTCTGTGCTCTTTGAANCCGTGAAGCGAGAAGCAGAGAGCTTGGTCTTTGAGCCTTGAATGTCAAGTCATACGAGCCATTTGCTGCTTCTCAAGTTGCATTCTGTCCTTGGGTTGTGTATATATTTTTTCTCTTATGGATCTAAAAAATAAAAAGGATTTCTGTTTGCTTGTTAATTGACTAAGATTCAATAAAAATATAGTAGTTTGCTGAAANNNNNAAANNNNNNCATAATTTGTAGATCATGATGCCGCGAACTCATGCTTGTACTATTTTATTTACTAGTTAAATTTTGCTTCTTAAAACTTGTAATGGA
Gma.197.1.S1_at	U55874.1	At3g47340	0	Metabolism	Amino Acid Biosynthesis/Metabolism		CCCTCAGAACTCAGCCAGGCTGAGTGTTCCTGGAGGACCAAGTGTTGCATGTAGCACAGCCAAAGCTGTNGAGTGGGATGCTGCTTGGTCTAACAACCTTGATCCATCTGGTAGNGCAGCACTTGGAGTGCATGCATCAGCTTATGGAAATCAGGTCAAAGCTGTAGAACCAGAGAAGATCATACCAAAGATGGAAGTTTCCCCACTAGGAGTTGCCATATAGAGCTAGTATGAGCCATAGCAAAAACTAGTAGTTGCCCTAGAACCAAAATATATTATTATACTAGTCATCAATNACTCATTAATCATCATAAATGAAAATTTGGCCTGCTGTGTAGTTTATTCAGGCAAGGCTATATATAAATA
Gma.2216.1.A1_at	BM885752	At3g46940	2e-11	Metabolism	Nucleotide Biosynthesis/Metabolism		TGTTCTGTTCTCTTGGTAATTTTGTAGAGCAGTTGGTGGGTGTAATCGAATGAAGAACCTGTCTTTATCTTTTGGCTTGTTAGTGTTCTGTGTGTGTCCAAGTTATGATGGTATTGATTTGGTCATCGGGGAATGGCAGTAGGTATTAGGTAAATGCTTTCAAAGCT
Gma.2075.1.S1_at	BI969313	At2g35120	1e-67	Metabolism			TGATGAAAATTCTGCAACCGTCGGCATAACTGATCATGCCCAAGATCATTTAGGTGATGTTGTATATGTTGAATTGCCAGAAGTGGGAGCAGCTGTAACACAAGGAGGTAGTTTTGGTGCAGTTGAAAGTGTGAAGGCAACTAGTGACATTAACTCTCCTGTTTCAGGAAAAGTTGTTGAAGTTAATGAAGCGCTTAACAGCTCTCCTGCTTTGATCAATTCAAGCCCTTATAAAGATGGATGGATAATTAAAGTTGAAATAAGTGACAATGGTGAACTAAACAACTTGATGGATTCAGATCAATACTCCAAATTCTGTGAAGAAGAAGATTCCAAGCACTGATGATCTTGGCAAGATCTTTCAGCACTCTTCAATCTCCATGGTGTAGATCATGTTTT…
Gma.2105.1.S1_at	BI424905	At5g37600	1e-162	Metabolism			AGAAGGCCATTGAAAAGCTTGGATTGAGGCACAAGGAGCACATNGCAGCATATGGAGAAGGCAACGAGAGACGTCTCACNGGAAGACATGAAACTGCAGACATCAACACCTTCTCTTGGGGTGTGGCAAACCGTGGAAGCTCCATTAGAGTTGGAAGAGACACAGAGAAAAATGGCAAAGGTTACTTNGAGGACAGAAGGCCTGCTTCTAATATGGATCCNTATGTAGTCACCTCCATGATCGCAGAGACTACCATCCTCTGGAAACCATGAAAANACAGTCATATNGTCTCTAGATTTGGACCACTNAAAATTGTGTNNNNNATAGTCATTTGATCTAAAANTTTATATTTGCAAGGTGNTGTTTAGTTAGGAATTTCTAAGTGGTCTTTTTGAGCCT…
Gma.1917.1.S1_s_at	AF243365.1	At1g78380	4e-82	Metabolism			ATGAGTTCGTTGTGGAGATAAGAAAGAAGTTAGTCATCGAGTAGGTTTCATGTTGGATCTTAATAGCCATAGTGAAGTATTGGTCGTTCTTGACCTTTCAACTAAATAATATTTGTGTAATAAAAAGGCATTTGGATGTGCCAAA
Gma.1928.3.S1_a_at	BI426837	At5g26667	8e-94	Metabolism			GTGGCAATGACAAATTTCTTATTGATGGTTTTCCCCGCAATGAGGAAAACCGGGCAGCATTTGAGAAAGTGACAGGAATAGAGCCAGCATTTGTCTTATTTTTTGATTGCCCTGAGGAAGAGATGGAGAGGCGACTTCTTAGTAGGAACCAGGGTAGAGAAGATGACAATATTGAAACAATAAGGAAGCGGTTTAAGGTTTTCTTGGAGTCTAGTCTTCCCGTGATTAATTATTATGATGCAAAGGGAAAAGTTCGCAAGATTGATGCTGCAAGACCTATCGAAGAGGTATTTGAGACAGTCAAAGCAATTTTTGGTCCAAAGAATGACAAGGCTGATTGAGCATGTTCATCTTGACTCCATGGTGGAAATTTAGAGGTCATATCAGTATTGGTGGCTT…
Gma.17599.1.S1_at	BI699318	At1g23800	0	Metabolism			GGCAACAAGGGCTTCTACATTCAACCTACAGTCTTCTCAAATGTTAAGGATGGCATGCTGATTGCAAGGGATGAGATCTTTGGTCCAGTCCAATCCATATTAAAATTCAAGGATCTTGGTGAGGTAGTTCAAAGAGCAAATAACACACGTTACGGGCTTGCGGCCGGAGTGTTCACAACGAACATGGACACTGCCTACACTTTGACGCGGGCACTGAGAGTTGGAACAGTNTGGATAAACTGCTTTGACACATTTGATGCT
Gma.17610.1.S1_at	U50075.1	At1g55020	0	Metabolism			CTATCTAAGGGCTCTATGGTTGCTGAAGTACTGTCCCTGGCT
Gma.17610.1.S1_x_at	U50075.1	At1g55020	0	Metabolism			TGACTACTGGACTTCTGATGCCGGGCCATTAGAGGCCTTTAAGAGGTTTGGAAAGAATCTTGAAGAGATTGAAAAGAAGCTTATAGAGAAGAACAATNATGAGACATTGAGAAACCGCTATGGGCCGGCTAAAATGCCTTACACTTTGCTCTATCCTTCTAGTGAGGAGGGATTGACTTTCAGAGGAATTCCCAACAGTATCTCTATCTAAGGGCTCTATGGTTGCTGAAGTACTGTCCCTGGCTTTAAATA
Gma.17610.2.S1_s_at	AW348397	At1g55020	0	Metabolism			TATCTAAGGACCCTATGGTTGCTTAAGTACTGTTCCTGGTTTTAAATAAATGTGAAATTGAAGGAACCAGATTCCTTAATCAGTTGTGT
Gma.17774.1.S1_at	CA935572	At3g02360	3e-05	Metabolism			CAAGTAGTGCGTTAATCCAAGTAGTTGATTTCCGTTGCTTTTATAATTATGTTGTCAAATTGGGCACCCAGTTGTTAGAGGCACTGGTTTCTCCTTTTTGATGTTTTGATACATTTTTGTTTGGTTTAATTCGTCTTATGTTATTAGCTGAAAACAATGCTGTTACTGCGTTTGCGAATCAACATGATCTCTTATATGCAA
Gma.17702.1.S1_at	CD414209	At3g14680	1e-67	Metabolism	Cytochrome P450	CYP72A	AAGCTTTCCTACTTGCCATTTGGATGGGGTCCTCGACTCTGCATAGGACAAAACTTTGGCTTGTTAGAAGCAAAAGTAGCTGTGTCAATGATCCTGCAACGTTTCTCCCTCCATTTTTCCCCCTCCTATGCTCATGCCCCCTCCTTTATTATCACTCTTCAGCCTGAGCGTGGGGCTCATCTCATTTTACGCAAACTCTAGAATGCACTTTTTAGTCTAAATAAGGCTTCTTCATTTGAGGCGTGTTTGCAATTTTAGTTTTCCTATTCCTGCTAGTTTCTTATGTAGACGATAGATCNGAACCTTCACTTCAAATCTATTTCCAAGATCAATATATACCTGTTTNGCCTAAGTTACTGGTGTAATTACTCCTCCT
Gma.10216.1.S1_at	BI969369	At5g54160	1e-68	Metabolism			GGTGTTAATTTTGACTTGCCACATGTCATAGAGCATGCTCCTACATACCCCGGTATCGAACATGTAGGAGGAGATATGTTTGAGAGTGTTCCCAACGGAGACGNCATTTTTATGAAGTGGATACTTCACGATTGGAGTGATGAACAATGCTTGAAGTTGTTGAAGAATTGTCATAAAGCTATTCCTAGTGATGGAAAAGTGATTGTTGTGGACTTAATTCTTCCCATTTTGCCCGAGAGCACAGTTACTGCTAAGAGTGGTTTCCAAGCTGACCTCTTAATGATGACTCAAAACTCAGGAGGAAAAGAGAGAACCCAACATGAATTCATGGAATTGGCATTAAGTTCTGGATTCAGTGGCATCAAAATCGTTTGCAGTGTCTCTGGCTTCTGGGTTATG…
Gma.10690.2.S1_s_at	AW394305	At5g66120	2e-62	Metabolism			GGTAATGGCTGTTGACATGTCATATCGCCTAGGTTGGATTGATGATTCTCTAGTGAAGAGAGTTGGAGATATTTTAAAACAGGCTAAGTTACCNNCAGCCCCTCCTGAGACCGTGACTGTGGACATGTTTAAATCTGTCATGGCAGTGGATAAGAAGGTAGCAGATGGGTTGCTAAGGCTTATCCTTCTAAAGGGNCCTCTAGGCAATTGNGTTTTCACAGGGGATTATGACAGAAAGGCTCTAGACNATACGCTTCGTGCATTCTGTAAATCCTGATCTTTGTGCTCCATGTTTCTATTGCAGCTTTATCCAATTCCTTTTAG
Gma.10759.1.S1_at	BE822425	At4g23850	1e-108	Metabolism			ATATTTACGGTCAAGTTTCTTCTATTGAATCTATATGGGTTTATGGAAACAGTTTTGAGGCCTTCCTTGTGGCTGTTGTTAACCCCAGTAAGCAAGCACTTGAACATTGGGCCCAAGAAAATGGTATATCCATGGACTTCAATTCTCTCTGTGAAGATGCTCGAGCAAAAAGTTACATAATTGAAGAGCTCTCAAAGATTGCGAAGGAAAAGAAGTTGAAAGGTTTTGAGTTTATAAAAGCAGTTCACCTTGACTCAATTCCATTTGACATGGAACGTGACCTTATCACTCCAACATACAAGAAGAAGAGGCCACAGTTGCTTAAATACTATCAGAATGCCATTGACAACATGTATAAGAGTGGAAGTAAACCCAGTGCCTGAGACCTGATTTGGGAGA…
Gma.10721.1.S1_s_at	AF074940.1	At3g17240	0	Metabolism			TTGAATACCGTGTTGGCAAGTTCCCNTTCNTGGCTAATAGCAGAGCTAAGGCAATTGACAATGCTGAAGGACTGGTGAAGATATTGGCTGAAAANGAGACAGACAAGATATTGGGAGTGCACATTATGGCACCCAATGCAGGAGAGCTTATTCATGAAGCAGCAATAGCACTACAGTATGATGCATCTAGTGAGGACATTGCACGTGTGTGCCATGCACATCCAACAATGAGCGAGGCTGTGAAAGAAGCCGCAATGGCCACTTATGACAAGCCCATTCACATTTAAAAGGAGCCGGTTGCTACTTTCTTCTTGTTTTCATTTTTGTCCAAGAATTTTACAATGACTTGGAGATGATACATCCTGTGTTAAATTTAGATTCAGGTTTTTAAATGCAAAT…
Gma.1079.1.S1_s_at	AW350347	At4g13940	0	Metabolism			AGTTTTGTGATGTCCTGCTCCTTCACCAACCAGGTCATTGCTCAGCTTGAGTTGTGGAAGGAGAAGAGTACCGGCAAGTACGAGAAGAAGGTTTACGTTTTGCCCAAGCACCTTGATGAGAAGGTGGCTGCACTTCACCTGGGCAAACTTGGAGCTAAGCTNACCNAGCTTAGCNNGNCCCAGGCTGATTACATCAGTGTGCCTGTTGAGGGTCCATACAAGCCTGCTCACTACAGGTACTAAGTGATTGAGATGATCAACTGAAAAGTGAGTGAGGGAAAGACAAAAATCGGTTTTATCAATCGGATTTGATTGTTTAATTTTCCTTTTTTTGATTTTTGGTGTTAGACTTTTCAGATTTGTGGTAGAAGAATTGTAGCCNNNNNNATTTTTATTTCT…
Gma.10801.1.S1_at	AW309829	At3g54020	1e-108	Metabolism			TTGAATGGGAATTCTGGAGACCCTGNAGATTGGAGGCAGAGAACTCAAGTGAATGGCAAGATCATGGAAGATGGCAATACACTCCATGCAGANTCTGCCATGAATGGTGCATAGATATAGGAGCCTCTGCTGTATAAATTGGATCCACTGCAAAGATTGCTGCTGATGGAAAAGCTGCAACCAACCTTCAATTTGAAGGATTTGTTGTCTGAAACATTCACCTGTTAATTCAAATTAGTACGCCCCAATTTGTACTAGTGAAATTGAAACTGGGTTGTGCATTTCAACATTTTGCAGCTCAGATTCCATGTCATGGTTAAATTATCTATACACCATCAGCATGTGCCATAGAAAAATTTCCATTNCCTCTTTTACCNTACATCATTGATCCCACATGCA…
Gma.11166.1.S1_s_at	AW705829	At1g55020	1e-156	Metabolism			CTCTCATTGACAAATAAACGTGCAAACTTATGTGTGCATAATTTTCTTATGTATGCTTAAGTTTTGTAATTGGATGCTATCTAGTTTTTCATATCTAATAGGGTGTTGTGTCAGTTTTTATGTATAGTATTGTGCTCCT
Gma.11126.1.S1_at	AI960156	At5g11670	1e-160	Metabolism			CAAGGGCAAAGTGTACTATTCTGGCCAGGCCAACAATGCNTACATNTTNCCCNGGNCTTTGGTCTNGGGNTTGGTAATCTCAGGAGCAATCAGAGTGCATGA
Gma.11027.1.S1_at	BG511525	At5g43940	0	Metabolism			GTTGCAGCATCAGGGCAGGAAATATCNACCCGTCCNTTCCAGTTGGTGAGTGGACGNGTCTGGAAAGGAACAGCTTTTGGTGGCTTCAAGAGCAGGTCACAGGTGCCTTGGCTTGTAGACAAGTACTTGAAGAAGGAAATCAAGGTTGATGAGTANATTACCCATACTTTGACNCTTTCGGAGATCAACAAGGCTTTTGATCTTTTGCATGAAGGGGGATGNCTTCGNTGTGTGCTTTCNACACAAGAATGAGGTTATCTATGCTAGCCTGGCTACTTTCGTGAGGAATGGATGTGTTGGGTTGCTTTTCCCCTCTTTTAGTGGTTGTAGTTTGAACTTGAAATAAATCTCGAGTGGNTATAGTTTGTAAGTAAGATCATTTTGGTCTATAATATGGAT…
Gma.11028.1.S1_s_at	BE823084	At5g14780	1e-121	Metabolism			GATTGTTAACAATGCTCGAGGGGCAATTGCGGACACNCAAGCAATTGCNGATGCTTGCTCCAGTGGCCACGTTGCAGGTTATAGTGGTGATGTTTGGTTCCCACANCCAGCTCCAAAGGATCATCCATGGCGNTACATGCCAAACCATGCCATGACTCCTCATATTTCTGGNACCACCATNGATGCACAGTTACGTTATGCTGCTGGNGTCAAAGACATGCTTGATAGGCACTTCAAGGGTGAAGACTTTCCAGAACAAAACTACATTG
Gma.11028.2.S1_s_at	CA782711	At5g14780	1e-169	Metabolism			GGGCAATTATGGACACCCAAGCAATTGCTGATGCTTGCTCTAGTGGCCACGTTGCAGGCTATGGTGGTGATGTTTGGCCCATACAACCAGNTCCAAAGGACCATCCATGGCGNTACATGCCAAACCATGCCATGACTCCTCATATTTCTGGCACCACCATTGATGCACAGTTACGTTATGCTGCTGGTGTCAAAGACATGCTTGATAGGCACTTCAAGGGTGAAGACTTTCCAGAACAAAACTACATTGTGAAGGAGGGTCAACTTGCAAGCCAGTATCGTTGAAGTGATGCTTTTGTTGAATTTGAATCTTCCATTTTAAAGTTCCACGGATTAGCAAATAAAGATCTATATAGAGGGCACTCTAATTATATAATGTACTTGCTTTGTTGAATTTGAA…
Gma.11052.1.S1_at	AI795084	At3g23490	5e-57	Metabolism			GCCATGCATATTTATACAATGTTTTATGGCTTTGGATATTTCATGACACTTGCACCATGTATTTTAATGCCAGTTAATTATAAGATGGAGAAGCTTGTATTGTGCTTGGTTGAGCAAGTCAAATAA
Gma.1269.1.S1_at	AW309671	At1g51410	1e-135	Metabolism			GACCTTGGGGATTGAATTTATTCCTTTGGAAGTGAGTCTTAGAGAGACAGTGGAAACTTTGAAAGAAAAGAACTTTGCCAACTTTTAGTCTCTGATATCTCTGCTTGATCAGGAGTGAACACGTTGAGAATCTCAACGGTGTTTCGNTTGTGGTTCTGGTTTTAGAATCTCATTGCTTGAAAATAAACTATTGTACTGAAATGTCAAGCTTGTGTGTTGTAATAAAACAAGATTAATTGTTGGTTTTATTTCGGTTTGTACTCATGAAGGAAACCAACGTGTGGTATA
Gma.13487.1.S1_x_at	BG045417	At3g14390	1e-128	Metabolism			TGATGCTTACCAGCATATAGAGCTGGTTTCCCCTGCCCCNTCAAATGCTGANACANNAACTTTTGATGTGGTTGGCCCTGTCTGTGAGTCTGCAGATTTCTTAGGAAAAGGAAGAGAACTNCCTACTCCAGCCAAGGGTACTGGTTTGGTTGTTCATGATGCTGGTGCTTATTGCATGAGCATGGCATCAACCTACAATCTNAAGATGCGGCCTCCTGAGTATTGGGTTGAAGATGATGGATCAGTGAGCAAAATAAGNCATGGAGAGACTTTTGAAGANCACATTCGGTTTTTTGAGGGGCTTTGANNNNNTNATTTATNTTGTANGAAAGAAGGNTGGAGAATTNTTNTGTANTTGGAGTTTGAATCTTTCCTNGTCAATGAATGCATGACTCTTAG…
Gma.1137.1.S1_a_at	BF067710	At5g48930	0	Metabolism			AGCAGAATCCACAATGCATTGTTACGAATGGACAACGATTATTTGAGATCGGCTCTTGACTATCTAGAACTGCAACCCGATCTAAAAGCGCTGGTTCGTGGGGCTCATACTTTCAAGTGTCCAAACCTTGGTATCACTAGCTGGACTAGGCTTCCAATCCATGATGCTGACTTTGGTTGGGGAAGGCCAATATTCATGGGACCTGGTGGAATTGCATACGAGGGGCTATCTTTCATAATTCCAAGCTCAACCAATGATGGGAGCCTATCTGTGGCCATAGCTCTTCAGCCTGACCATATGAAGCTGTTTAAGGATTTCTTGTATGACATTTGAAGAATCATTGCCTTCAAGCCATATGGAACGCCACAATGTTTCTAGGTGGGGTTTTCTTTCCCCTCG…
Gma.11261.2.S1_s_at	AW318293	At3g06580	0	Metabolism			TTTGTCGTAACAATGGTGCTCTTGGGGCAAGGCTTACTGGAGCTGGATGGGGTGGTTGTGCTGTTGCTTTGGTGAAAGAGAGCATAGTTCCACAATTTATCCTTAATTTGAAGGAATGTTTCTACCAGTCTAGAATAGACAAGGGCGTTATTAAGAAGAACGATCTTGGCCTTTATGTATTTGCTTCCAAGCCATCAAGTGGTGCTGCTATCTTCAAGTTTTAGTGTTCTTTAACCCGCTTCCCTTCTTATGGCTGCGACTTTCTTCCCCTGAGATCTAGACACAGATTAGATGCAATTTCTGATGGAGTAAGATTAAATGGTACCATATTTTCTTTGTTAAATTATTTTAGTTGATACGATGAAAGCAAATAATGATAATATTGCCGAACGGCTTTTA…
Gma.11265.2.S1_at	AW756751	At5g18670	1e-167	Metabolism			CATGAGGTTCAGGTTTCAGGTCAAAATTCGTCTGAATCTGGTGTTCCAGGGGGGTTTGAACAAATTAAGAAGAATTTATCTGGAGATAATGTATTGGACTTGTTCACATATCATAGAATGGGAGCATCATTCTTCTCTCCAGAGCATTTTCCTTTGTTCACTGAGTTTNNNNGGAGCCTTAAGCAACCGGAACTGCATTCAGATGATCTACCTGCTGAGGAGGAAGTAGGTGCTGAATCCGCCGTGGTTATGAGCCGTGATTCAACTGTGAGCATGCAAGCAGCCTAATGGTTGTAAATTTGTAATCTATGATAATCATGTATATAACAATTAGTTATTATTATACTACCCTTGCATCAGTGCATGGGATGAGATTGAGGACAGGTTATTTTGTAAGCA…
Gma.12181.1.S1_s_at	BG041826	At5g18800	5e-23	Metabolism			GGCCTTCTGAAGGATCTGCACCAAAAGTGCACAAAGGAGATGGATGANTATGTTGGCTGCATGTACTACCATACAAATGAATTTGACTTGTGTCGCAAAGAGCAGCAAGCATTNGAGAAAAAGTGNTCTTTGGAATGAAATTATGCACTGCTGTTGTCGAAAATAATATCACAGGCAATTTGGAGTGAGCAAATGAGCCTGTTTTCCAAAAATTCATTG
Gma.1445.2.S1_at	BQ610936	At1g15950	1e-135	Metabolism			TGAGTCAGTGTCTATATGAAACAGTGAAGAGCCTGCAGGAGAAAGGCCACCTTCCAGTTCCTGCAAAGCAGCAGGAAGAAGATTCAACTACCGTGAAATCCTAAATGAGCAGCTAGTTGTCCACTAAGGCAAGAAGCTGCAGCTTGTGGCAATCTGTGCTCATCTTATATATTATAATAGAGAATCCTACATTAGAAGACTGCTGTATTTGGATTTTGTTAAAAAGACATCAACTAAATTGTTGCCGTGTATGAACTTATAA
Gma.1449.1.S1_at	AY157740.1	At4g09320	2e-72	Metabolism	Nucleotide Biosynthesis/Metabolism		AGTAATACAAATGCCTCAAGTTGATCTTGAAATTGGCCTTAGGTTGATCCAGATTATCTACATGTTTTCTGTTTTTGTCCATTGTTGGACTTTTGCTAAGAGTTTGGTACCGTGGTTTGCATGTAGAGTCTATTTATGTCATTTCTGTTGAANCATGCTCACAGTTTGATAAATTAAA
Gma.1449.1.S1_s_at	AY157740.1	At4g09320	2e-72	Metabolism	Nucleotide Biosynthesis/Metabolism		TGGACCGTCCTTTTGCTGAGAAGCACTATGCTGATTTGTCTGCAAAGCCTTTCTTTAGTGGTTTGGTGGATTACATTGTCTCTGGCCCTGTTGTTGCCATGATCTGGGAGGGTAAGAATGTTGTTACAACTGGCCGAAAGATTATCGGAGCCACAAACCCAGCTCAATCTGAGCCTGGAACTATTCGTGGTGACTTTGCTATTGACATTGGAAGGAATGTTATCCATGGAAGTGATTCAGTTGAGAGTGCTAACAAGGAAATTGCATTGTGGTTCCCTGAGGGCCCTGCTAACTGGCAAAGCTCCCAGCACTCTTGGATCTATGAGTAATACAAATGCCTCAAGTTGATCTTGAAATTGGCCTTAGGTTGATCCAGATTATCTACATGTTTTCT
Gma.1430.2.S1_a_at	BF068964	At3g22850	2e-97	Metabolism			GCATTTGTTGCTGCGGATGCTGATGGGAGTGTTCCCTTTGTCTGGGGAACTGATGCTGATGGAAATCTCGTTTTCTCAGATGAGACAGAGATCGTAACTAAGAGCTGTGGGAAATCTTACGCACCATTCCCCAAAGGATTTTTCTTTTCAACATCCGGAGGTTTGAGCAGTTTTGAGCATCCACTGAATGAGGTGAAGCCTGTACCAAGGGTTGNNAGTTCCGGACAGGTGTGTGGTGCAACTTTCAAGGTGGATGCTGAGGCTAAGAAGGAAGCAACTGGCATGCCAAGGGTTGGGAGTGCTGCTAACTGGTCAAATAATATCTGATTGCGACTCTATTCTGTTTGAATTATGGGCTTTTATTTTATCATAGCTGCACTCGGC
Gma.14855.1.S1_s_at	BU550191	At4g33680	0	Metabolism			CGGCCGAAGCTCATGGGATGTATTCGCTGAGATTCTTGAGAAGACTCATGTGGTTACAACCCCTGGTAGTGGTTTTGGACCTGGTGGTGAAGGTTTTATCAGGGTTAGTGCCTTTGGTCACAGGGAAAATGTCTTGGAGGCATGCAGAAGGTTCAAGCAGCTATACAAGTG
Gma.15037.1.S1_at	BE347885	At5g27320	2e-06	Metabolism			TGCTCCCGCTATTAGGTACTTACATGCTACTAAATGTGTCGTGAGATTTGGTGTAATCAGCATATAGCTGTGTGATGTTTTTCCTGAGCACATAATGAGGAAATTGGGTGCTGCGGATAGGTGANAGCTTTTTAGGACAAAGGGAGCTCAGGTCATGTTTATGGGAACCACCAAAGTTGTGATTACCCACTCTGACTTCTAGCCAAAAAGGAGAGGAAGGCCTTATTCTATTTCTGGGCGTGACCTTGATGCCAATCAGGTGGGGCTTGTCGTTGTCTGGCTAGTGTTATATATATATATATATATATAACTAATTTTGGAACTAGGATAGGAAAATATCAATGATATGTTGGTGCTGTTAGGTTATATACGTCTGTGCTATCTTCATATGAGTGTTTT…
Gma.15059.1.S1_at	BG725838	At2g39420	1e-39	Metabolism			GAGAACAGCCTACGAACTTCTGAGGGTCAGTACAGAAATTGAGCAAAGTCTGCATGAGGTTTCACTACCCTTTATAGTTTTACATGGTGAGGAAGATCAAGTGACTGATAAAGCAGTTAGCAAACAACTATATGATGAGGCGGCAAGCTCAGATAAGACNNTAAAGTCGTATCCAGAAATGTGGCACGGTCTATTGTATGGAGAGCCACCACAAAATTTGCAGATTGTATTCTCCGATATTATTGGTTGGATAGNCCAGAAATCTCGCTATGGAANTACACGATTGGAGAGAGAGCTAAAAGAAGAACACGAACATTTGTTCAAGTCTGATCTCTAGCCAAAGAAATTTGTCTTTCTTGGAGGTCTTTGGANAACAAGTGTGCACGACATCGNCTGCTA…
Gma.15179.1.S1_at	CD402104	At3g48560	2e-83	Metabolism	Amino Acid Biosynthesis/Metabolism		TGGGAGGATCGGTTCTATAAGTCTAACAGGGCTCACACATATCTGGGAGACCCCTCTAATGAGAATGCCATATACCCCAATATGTTGAAGTTTGCTGATGCTTGTGGGATACCGGCAGCTCGTGTGACCAAGAAAGAAGACCTTAGAGCGGCAATTCAGAAAATGCTGGAGACCCCTGGCCCCTATCTTCTNNNTNNNNNNNNNCNNNNNNNNNNNTCAAGAGCATGTCTTGCCCATGATTCCTAGCAATGGAACCTTCCAGGACGTGATAACTGAGGGTGATGGCAGGACAAGTTACTGATTTCCTGAGCATATTTATCTTCATGGTGGTTTTGTAAAAATAGTAAGCTAATATAGCTTCTTAAATTTTGTCTTCACGTTGGCTACTAATATAGGCTG…
Gma.15323.1.S1_at	BQ786753	At2g35120	5e-67	Metabolism			GGGAAAGCTGCTAAATTACTTATTCCTTTTTCTCCTTGTGTCATGGTTTGACCACTGCTCTATTTTTATTTTTCATAAGCTTCTGAACCAGTGGGATGATATTTTTCAC
Gma.15478.1.S1_at	BI968543	At1g02500	0	Metabolism			CATTCCACTGCAATGTGCTGGGAGTTTTTTAGCGTTGCCCTTATAATGTCTATTATCCATAACTTTCC
Gma.15775.1.S1_at	BU765934	At2g37790	1e-122	Metabolism			AATATGCTTCATAGAGATGTTGACAAATGCACTGCTCCTCAAGCAGATTGATTCCGCCTTTTACCTGTTAAGATCTTAAAGCTACCAGCTGTAGTGATTCAAGTATGTTTGAGATTTTGAGAAGAGCTATTGTTCATAATAACACAAAGTAACCGAGACTTATTTTTCATTTATAATTGTTGTATCTTTAATTCAATCTAAAGAAACCAGTGCAGTGAATTTTAAAGGTCTGGTAGCCAA
Gma.15564.1.S1_a_at	AF293970.1	At2g22240	0	Metabolism			TTAGCTGCTCCTATTATCTTGGACTTGGTCCTTCTTGCTGAGCT
Gma.15564.3.S1_s_at	AW185750		0	No Homology to Known Proteins			CTTACCACTATTAGCTAGCATAGCTCTATGGATATGAA
Gma.15617.1.S1_at	CA852426		0	No Homology to Known Proteins			GAAAGCAAATGTTGCCCGCGGTCTTGTATTTTGGGTGACTGGCGGAGAATATTTTGATTTTGCCAGAGAAGNNNNNNNNNNNNNNNNGATGTAAATATGTGATTTTAGTGTGTAATTAATTTGTATAGTAAAAGGGTAGTCATGAAATGGATTGTGATTGCAATGATAGGCCCAATACGAGGCATGATCGTGGGATGAGTGCAATCCTTTATCGGGAATTCTTTTTCCATGTTGACATTGGGGCATTTCTTTTATTGAGCCCCTGAAAGAAAACAAGGAAATTCAGAAGGTCATTGCCTGTGATTTGTAC
Gma.15769.1.A1_s_at	BG045620		0	No Homology to Known Proteins			CAAAATGGAGTTGCACTTTTAGTTGATGGGAAATATTTGGGAGGCATGTTGGAGGTTCTAATTTTATTTTAAAAAATTTGTCAAGTGCATATGTTTTTTGCCCCCACCTATGTATGGTCCCAAATTTTGTAACTGCACGTGTAATCATATTCAAGTACTTCAGATGTTACCCTTCACAGGTTACCATTAAAATGCAAGGTTAAAGTGTACTGTGATCAAACTGGGTCGAGTATTTGCAGAAATA
Gma.15513.3.S1_x_at	AW598013		0	No Homology to Known Proteins			GTAACAGTTTAGGATGTCCCTGCAATTGCCATTTGTAGTTATCTGTTAATTCTGTTTGCCTTTCGGGTCTTCAACCCATTTGTTTATTACAAT
Gma.15543.1.S1_s_at	L22030.1		0	No Homology to Known Proteins			TGAAAGCACCATTCATGATGAATCATGTTCTAGTTTTCATCGAGGAATAAAGGCAAGCTCTATTTTGAGCCAAGTGAAACATCTATCTTCCTGTCTAAGTTCTTTGAATAAAAGTCTGAATGTGTCATCTCTATGCTACAATGTTTATGATTCAGATCAGGTTGATTCTATTTGTTTGA
Gma.1526.1.S1_s_at	BE822523		0	No Homology to Known Proteins			ACATGATGAAGCGTAGGTGGATGCGGGAAAAGAAAATTGTTTTGCATAGTTGTTGGGTTTAGAATTTCATAGGATGGTTCCCTACCCACATCCTTTTCTGATAATTAGTTTCTGAATTTTTATTTTGTCCTCCCTCAGTAGGTTTAGATTAGTGCACAATNGTAATTAGGGTTTAATATCATGATCCTGTACTTAAAGTCAAT
Gma.13983.1.A1_at	AW101913		0	No Homology to Known Proteins			TTTTTCACCTTGGAATTCATCAATGTCTTCGAAAGTAGGTTGTCTGTAGCAAAGGAGTGATTGTGAATGCTTATTTTATTTTCTATGTATCCTTTTTCAGAGTTCACATTTTTTTTGNCNNNCGNNNNATTAATGTGAATGTCTATAGCTACATGTATCGAGAATTTTATATAAGATTGTCAGTTCGCACTCAAATTATCAAATTTTAGTTTATTCATGAATCACTTGCCCGATATTTGAGTGTGCTATAGGCATGAAGACACACTTAAAAGTTGTAATGGTGAGGATACCTGCACGATCCCTGGTTT
Gma.14067.1.A1_at	CD414740		0	No Homology to Known Proteins			AGCCAGACAGAAGCCGCTGCTTCATTTTAAGAGGGTTCCATTCATCCTTGATTTAGTTTCATTACCTGGGGTTTATATTTTTATTTTTCCTTTTAACTTTGGTGTATAGAGAGGAGGGGCATAGAATTCTTGGATATGATGATAGTTTTGATATGGTGGTTATTATTGCTGGTGGTGGGGTATGTGTATAGTTCATACCTTTAGGTTCTCCCATGTATTTTGTTTTTGTCATTCATGTCTTATGGTTTACAATTGAATCCGTTGATTTTTGTATTTAGACCACACCTCAGTG
Gma.14127.1.A1_at	CD415773		0	No Homology to Known Proteins			AAGATGCCATCACCGATAACAAGGGTGCTGATCTCGAAGAACACATCACCGATAACAATCCTGTAGTTGTGACTCAGTGAACTGTGTTCCAGTTGTTCAATATGAACTCTTTCTTTCTAATGGATTTGTGCCTCACTTTTCACTACTTCTGGTTGATTACTATTTGCCTAGCATCCCTGCTTCGCTACATATACATACAATCAATATACAAAAGATGTGATCTGTTTCTGTGTCCAACACTCACCCACTCGGTAAAGACA
Gma.14129.1.A1_at	CD415788		0	No Homology to Known Proteins			GCTCCTCACATACCCTGTTGTGTATGTGGGATGGAGCAAATGTACTTTTAAGGCTTTTGTGCAGCAACATTACCATGCCTTGATCATGGCTGCTAACCTTAATGACAGAAGCTGCAATATTTTCCGTAGTCATCCGTAGATAATTTTGTAACGTCAATTGTTTAATTAGTGAGATAACTGATTTGTCGGCCNTTACTTACTATCGGAATTTTATATGGTTGTAACTATTCTTATTCGGG
Gma.14204.1.A1_at	CD417515		0	No Homology to Known Proteins			GTGACAATGTAATGTGACTCCTCTTGTAACACGCTTGCATGTTATTTTTAGTTGAATAAGTATAAGTACTAGGTAGCGTGTAATTGGGTATCCTAACATTGAGTTTAATCTTGATTTACATGCTCAGTTTTTAGTATCATCTA
Gma.12314.1.S1_at	CA819508		0	No Homology to Known Proteins			GTGCAAAATTTGTGTGATGTTGTCTATGTTAAAACTAATCTTGCGCTGTGTTTGCTATTTCAAGCGTGTTTTATTCTTCAGACCAATGGACGTGTTTTTCACTTT
Gma.11871.1.S1_at	CD409660		0	No Homology to Known Proteins			TGCTTCTTTGGTGGTTTATGGAGACTATTTAATGTGAAAGATTTTGAAAAGATGTCTGGCCAACTTTTTCTACTTGGCTATCTGGCGGCGCTCAGTTATCCCATTTTTGAGGGGATAATAACCATGAAAAGCAAGGTGCAATAGTAGTTTGTCAATGATTAGGCTAATTTAGGTATTTGAACTTTGTTCACAAATAATTTGCTTCATATGAAAATCTAAAGTGCATGCTAAATGTTTGTATCTTAATATGTAATTAGCGTGCTTTTATTTCATGCATGAGAATATGGCTATCGATTTTAATTAGGAGCAAAATGTATGTTCTTACTCCATTTTTAATG
Gma.1189.2.S1_at	BQ453094		0	No Homology to Known Proteins			ATTAGCATAATTTTTCCCCTCAAATTACCGTTTGTTTCATCTCGTTTGTCAGGGGCTTCGTGGTATAATATACACAATAATGAGATATACTATCAGGTCCAGTTAATTACTGGAATCTTTGAAAGAATGATAGCATGCTCTCTGTATTGAAGATTGC
Gma.1209.1.S1_at	BQ629459		0	No Homology to Known Proteins			AGAAATGATCACTAGCAGGGCTAAAGCACCCTTCCCTTTAGAGAGAGAAATTGTGACAACTTTGGCTAAAGGGGGGGCCCTGCCCTTGTCCATTTTTATACTTGACGGATGGCACAGTAATGTAACAACACGCTTGTGGGAAAACACTGATTTTCGTGTGTTTTAGTGCTATTGTTATTATGGGCCTTCCCTTGGAGGGTGTATGGACTTGTTACAGAAGAAGGGAAGGGTGATATCTTGGTCGGATGTAATTTAATGTGGTTGGTGCTACTGTTGTCTTTTTGCCTATGTAGTTACGTCGCATGCACGCATTTA
Gma.11430.1.S1_at	BE659510		0	No Homology to Known Proteins			TTCGCTATGGCACCAACATTCAAGGCCTTCGCTCTTTTCCTCCTCCTCGCTCTCTTCTCCGCCGCCTCCGCTCAAGAATTATCCCCCGCCTCGTCTCCGGCACCGTCGCCTGAAGCAGGAGCCGCAGACTCCGTGCCTTGCTCCGCCANCATGATCGGTGCCTCGCTCGTTTTGTCTCTCATGGCGGTCTTCAAGTTCTAGGATTTCTTATTTTGCATTTCATGAATGAATTAATATTCCAAAATAACATATATAATAAACTTGAGANTTTCCACGTTACCACTTCAGAGTTTATTTTATTATTTGTTGTAGGTCTTATGGTGAAATAACAGGGATTTTATCCTCTCTACATTTTT
Gma.13378.1.A1_at	CD395558		0	No Homology to Known Proteins			TAGATGCGTATGTAACTTTATATAGAGATGAACNACCCCATTGTTTTTTTTTTTTGGTTAGTTGTTGCCTCTTTACCAATCAGTCGGTCTTATTTTCATTCTTTTTGTAGTGGTAAACTTGGTTTTTTTTTAGCTGCCTTCCACCCTACATGCCCAAAGTGAGTAAAATCTGCTCCATAGTGCCACAATGTATGCCTTTCTCTTTTCTTTTTGTTAGGGGAGGACCATGTTTCTTCCGGCAAATGTAT
Gma.13298.1.S1_s_at	CD395877		0	No Homology to Known Proteins			TTCTGGTGGTGATCGCCATCGGGTTGTTATTCGGGTTCGGAGTGTTCAAGCATGGATTCCACAAGATCAAAGACACTGTCAGTTTCTGCGATTCTTGCGGCGGCGGCGCCGCCGGCGGAGGAAGACCCTTCATCGGTTATGCACCGCCGCCATTGTTCTAGTTCACCATTCTCTTGTTCTATTTCGCTCTTGTTAATTGTTCTGGGGATTTGTTTNGTTTCTTTNTATAAATTAGTATTCGTTAGGGTTCATATTTGTAATTACCTGCTTCTTG
Gma.12624.1.S1_at	CD400674		0	No Homology to Known Proteins			GCTTGTTCAGGACAATCAATTCATTGANATGGTCTATAGAGCNCTGCTGAATGCTCATCAATCATGACTTNCACGAGGTGTTTAATTATCATCTCGCTGGATGAATTGTTTTTTGGGCTGAATTACNTTTGCTATNCTTTTTAGGCCAGGCTATATNNTATGTCCTAAACTTTGAAATGTTTCAGTCNTATTNAATTTGTAAAATTGGTTGTGCNNNNNNNNNANNANTTTGATCTAGCTAGTTTCCTATGTCACTGTTTTTAGACAAGTCATCGCAATTTAACTGCCATATTAACTGTATTAGTTAGGTGACATGGCAGGAAATGGTGAGGTCCAGATGAATGGTTGTTAGCAATTCGGAACTGATTTTACAAATTATGTTGATCGACTGAAACAAAT…
Gma.11054.1.A1_s_at	BI970377		0	No Homology to Known Proteins			AGGTTGTCAGTCTCATTTGTCTTGCTTCTTATAGAGTGCAAGGCATAATTTTTCACAATTTTGTAATAATAGTATGATATGGTTGAACATAATCTGCTGTACTTGTAATGGTTTTAGGTCATATAGTAATAGATCAAAGGATTTGGTCAGTTATGTTCACAAAATCCCTGTATTCTCGTTACTTGTATCATAGCC
Gma.11007.1.S1_a_at	CA850791		0	No Homology to Known Proteins			CTTGTCTAATAAGGGTATTTGTGTCCTCCGAGACAGCAAAATTTTATTTATGTATGTGATGGAATTTGTATCTTGTTGATCTTTTTTTAACTTTGGATAGGGAATCAATCACATGGA
Gma.11007.1.S1_at	CA850791		0	No Homology to Known Proteins			TCTCTGATTGAAGTTATGGATTTGGGCTTATCCTCTCTGTCCTTTGTCATTTTCTTTACTAATTTAATTTTGTACTTGTCTAATAAGGGTATTTGTGTCCTCCGAGACAGCAAAATTTTATTTATGTATGTGATGGAATTTGTATCTTGTTGATCTTTTTTTAACTTTGGATAGGGAATCAATCACATGGACCATTGTTGCAATTAGAAACCATAACCCCTCCTAAGTTTTATCGTTNTCAATCAAGAATTTGATCAGTTATTAGTAT
Gma.11007.1.S1_x_at	CA850791		0	No Homology to Known Proteins			TCTCTGATTGAAGTTATGGATTTGGGCTTATCCTCTCTGTCCTTTGTCATTTTCTTTACTAATTTAATTTTGTACTTGTCTAATAAGGGTATTTGTGTCCTCCGAGACAGCAAAATTTTATTTATGTATGTGATGGAATTTGTATCTTGTTGATCTTTTTTTAACTTTGGATAGGGAATCAATCACATGGACCATTGTTGCAATTAGAAACCATAACCCCTCCTAAGTTTTATCGTTNTCAATCAAGAATTTGATCAGTTATTAGTAT
Gma.10969.4.S1_at	BG508006		0	No Homology to Known Proteins			TGGAAAGTTTTTTGCTTAAAGAGAGTGTTGCCTCGTGCCGAATTCGGCACGAGGGATAATTTTAGGTTTGGAATATGCGTTGTGGTTTGAGCATCTGTTACTGTTATGGTTGGGTTTTTGACATCTGATAATGAATCTGTGTACTGGAAGGATTACTGGGTCTTGGTCATCCAGATTGAAATACCTGAAAATCCTTGCTACCTATAAAA
Gma.11082.1.S1_at	BQ612677		0	No Homology to Known Proteins			TTATTTATCTACTTGCTAATCCTGTATTCAGCTTTGGAATAGAGTTGCAAAAAAATGATTTTAATAAAATTAAGAGAGAAGCTATGTTAAAAAAGCATACTTTTCATGGATAAAATATGGAAATTAATTTTGAACCGTAGATCTAATTGGCCTTAATATAA
Gma.11237.1.S1_a_at	BU548971		0	No Homology to Known Proteins			GGAGTTTAAGCCCAATCCACTAATCTTTAGGAGGGATAGTGTTTTAATTTCCCGCTTAGCATAAGTAGTACATTTCATCATCATCTTGAGGACTACGTCAATGGATGTGGAACTCAAAACACTTGCATGGAACCCTGGGAGATATTTTGGTTCCCTTGGGTACTTCACTTACTCACCAACCATGGTTAGGACATAGGTGAATCTCATCACTCTCTATCTCTCTTCTCCCTGCTTTCTGTCTGCCAACTTTTACATCGAGATGGACCTTGATACTCTATTAATTATATGTTTAATTAAGCCTATATGGTTTGGATTGTAATTAGGAATACTAAAGTAGGAGGATTTCATTCTCTGTCCATGCTGGATGAGAATGGATTTGCTACTCATTCTACTATGCCT…
Gma.1.1.S1_at	U36442.1		0	No Homology to Known Proteins			TTCCTAACAGCATCTCCATCTAAAGAGGTTTATGGTTGTGTTGCAATTTAAATAAAAGATGAGGTGTAATTCCTTCATTCCCGTGTATAGTTATTATGTATGTTTGGATGCTTTGATGTTTTGCTTTAATAAATTTTCTCTGTTTCTACTTTGTACCATGCTAGATTTACAATATGA
Gma.10328.2.S1_at	CD412052		0	No Homology to Known Proteins			ACTCCTTACTCATGCCTCATAAAGTCTGTCTTCACAAAGATAATTTGCTATTCTGAGTTCGTTTGCCCTTGTGTGGCATAGTCTATNATAGTCAAATTAGTGTACTTGAATTTGAGTCAAGTCTCCAACTGATAATGGAACTTAATTTTGGATTTAGACTCTACACAGTTTTAACGCTTGAAACCCTGAAACGTTCAATAGTGCTGTTATTTCTTGAGCCTGGAATTTTGTCAAATTTCAAAATGACATATATTGAACTTTGCTACTTGTGATGTTACCGTGACAAGATCACTTTTTAATTGAA
Gma.10626.1.S1_at	BE821063		0	No Homology to Known Proteins			TTTATCATTTCTTGCCTGTGGACTGTAGTGATTGAACAAATAAAAGTGACCTGTCCTGGGATACTGACAGGTGACAATTATCAGCACTGTTTATCACTCCAGCCTGCCTATATTGGAGGATTGAAAGTGATTTTCCCTTTATTTGAATCGGGAAAGTAAACTCTCCCCAGCCTTGATGATGTTTTTTNGCTTCTGTATTCCAGGCAAATGTAAGTTTGTATCCTGATATTTAAATGCCGGAGGTTTGTAATTTGTAAGCATATCTTAGTTTCTATTCTTTTGACATTTTGTATCACACCTTATAGATCATT
Gma.17888.1.S1_at	BQ473851		0	No Homology to Known Proteins			TACACCAAGATCCTAAAAAGCACTACAAATACCAAAATCTTCCACCATCAAATTACAAGAACAAATCACCATCCTCACCATACAAGTACCCATCATGCTGCACCACCACCTTACAAGTACCCATCTCCTCCACCACCACACTGTACAAGATACACCATCTACATGCACGCCCAGTGTACAAGTANNNNNCTCCTCCTNCANCAGATTACAAGTACAAGTCACCTNCNCCTNCATACAAGTACCCTTCACCTCCACCAACACCTAAGAAACCATACAAGTATTCATCTCCACCTCCCCCATACCACTACTAAATAGTGATTTAGTATATCATCCCATGGATCTGATGAAGAACGTGTGCAAATAAAGGAGATTGATATGGACGGAAGAAACACTGAAGCA…
Gma.17894.1.S1_s_at	CD393748		0	No Homology to Known Proteins			TCGGTTGTGCTGTCATTGATGGCTATCTTGAAGCATTGAATTCGTTAATTTCGTTGGGTTTGTACAAAATTGATTCGTTTTATATACAGAGTGGTGATTATGAGCTTTGGTATCTATACTTATAGGTATACCGGAGAGAGATTATACAGTATTTAATATACTTATTGTTATTTGTTTTAGGACTTAGGGAGAATAAGAAGGATTTTATCCTTTACATTGGACCCGTATTCTTTTTCAAT
Gma.17607.1.S1_s_at	BE658397		0	No Homology to Known Proteins			AGTTGTAAAGCACTCTGCGCTCTCTCTGCATGATCATG
Gma.1877.1.S1_at	BG791149		0	No Homology to Known Proteins			ATTATTAATCGATGGTTGTCACTTTGATGTTGTGTTCTGTGTTTGTATGTGTATACTATCTAGTAATGCGTTTGAACTGCCAAGGACAAGAGTACTTTTATTGATAATAAAGAAACGAAAACGTTTCAATTGCGTTGGCT
Gma.191.1.S1_at	BI945387		0	No Homology to Known Proteins			ACTCATTCACATGTTTTGGGGCGATTTTTTTTTTCGGTAGTCCTTTGGTAACCAAGGAAGTTTGTAGAAAAAACCATCGATGTCACTAGCTGTAAAATGTGAGTCAAGATGTACAGATAAGGGCAGATCCCATGCTACTCTGAAACATGAATGATCAATTCTGTCTTGTGAGTTTTTGTAG
Gma.1670.1.A1_at	BI893962		0	No Homology to Known Proteins			TCAACCTCATTTAGGCTCTCACTCATGCTTGACTGACAGCTGACAATTAACTTACAAAGACAACTCTGATGGTCAGATGAGTGTCACACGATGGTTTTGACTCAACAGTTGCACTCTTTGGTTGGTACTAGGTGTTAGTTGGCAAATCTGTTTGTTAGGTTTTCCACGTGTCATTTCTCCAGATGTATCTGTAGTATTGTTTANTCATTGTTGTATCAATTAGATNANAGGATATATGTTGTGCCATTTTCTCCCTTATTTATATTCTATATGGATATGTATGTTATAAATGTGATTGTATGTGAGTGTTTCTGAACTGTAACCTTTACT
Gma.16611.3.A1_at	BF424501		0	No Homology to Known Proteins			AAAGATGAACCACACAAACTGAAAGCTCTCGAGAAAATGATGGAGAC
Gma.16644.1.S1_at	BM094345		0	No Homology to Known Proteins			AATCAAGCCTCATCATCGATGCAGTTCCTCATCCTCGAACAAGTTCAGTTCTTGAAGGTGAACGACGATTCCCTCTTGCAGTGGGAACTCGTCGACGTCGTTGACGCCGAAGAGGAGATAGATGGCTTTGGTTCTTCGGATTCTTCCGTTTCTTGGTTCNAANTCCGATTCTTCTCCCTGCGATGCCCCAATTGAAGAAATTCGACACCTTCTTCTTCATCCCGATGTTGGTTTACAAGATCGACATGATGGTGTTGATGAATCGGAGCAAGATTCNGGTTTGGAAAATCATCATCACTACCATTATCACCATGATGAT
Gma.17343.1.A1_at	AW596532		0	No Homology to Known Proteins			TTTTGTTATTCCAGATTTGCTTAGATTTCTGTTGATGGTATGCATAATATATCCGCTACCCATTTTGTGAACACTTGAGTCTGAGGGAATCTTCATGACAAGGTACTGTTATTGAAACAAAACATGGTGGTTCTTAAAGCATGGTGATGGAATGCTGCTATTATGCCGAAGAGGATTCTACAANNNNANNTGGGATTTCGTTTTGTCAAATGATCTTTATGGATACAGCTTGTGGAGCGCTGATCTTTCAGTGGGCTTCCCAAGTGGGACTAATTATTACCATGGTTGTACANNGTTTCATTTTGTATAACTTTCATTGTTTTTTNAAACTGGATTAGACTGACTGGTTTGAG
Gma.17089.1.A1_at	AI938052		0	No Homology to Known Proteins			TTTGTCCCTTCAACTTTCACCTCATTTCAACTGCTTCTACATCTATTCTATTGTTCACGTGCGTCTCTGTGGCGTAGAATCTTGTTAAATTGCAACTCTTGTAAATC
Gma.17137.1.S1_at	BE022871		0	No Homology to Known Proteins			GTTCAACAAAATTGCCATGTTCTTTGCTTGTCATCATGTTTTTCCTTGCAACGACTTTGACTTTCACCTTCAAGACCATGACCTAGACAACGTCGTTGCACATTTTTTTAAACTTTGTTATTATCTTCTACTGCTTCGAGCATACTCACTTACTGGTATCATTTGTCCTTT
Gma.16792.1.A1_at	AW350500		0	No Homology to Known Proteins			GTTATGCTCTATTACTTGGTGTCTTTTATGCTTTAAGCATTTAGGATGCACACCTGTTATATTAGCTTTGTGTAATATTAATTGGAGGAATTTTAGGGATAAAGTATGCGGACTCGTAGCTTAATTTGGTTAGATGTTGTGTTCACTTGGGTGATTCAAGAGGTTCTGGCAGGATCGGGTTAGTATGTAGGATCTTGATGAGATGCCGGTGACTTTGTCATCCGTTAGTTGTAATTTATTGTCGGTCCATATGCCTAAACTTTCTCCTTGTTAC
Gma.16828.1.S1_s_at	AF047051.1		0	No Homology to Known Proteins			GTTGGATTCAAGTAGTTTATGTTCGTCTTATGTTATTAGCTCAAAACAATGTTGTTACTGCTTTTG
Gma.16832.1.S1_s_at	L22029.1		0	No Homology to Known Proteins			ACTACTAGATAGTGGTTTTGCTTAGCTTCCCGAGTAGTTATTAATGAAGAATATAAGCCAATAAAGAACGTTGTTGATAGCAGGAAGATGCACTTCGCAATTACACAAGGAAAACAACGGAAGCAAAGTTTCCGCGCATTTTGTCACATAAGAAGAAAGAAGTGTCCATCCTTTTCTTCTTCGTTTGTATTGTTTATGAATTTTTATTATTGTGTTTTTAGACAGTTGTATGGCACTATATCACATGAATGCATTTTGGTTTGTAACCTGCTACGTTTGCAAGGG
Gma.16977.1.A1_s_at	BE821395		0	No Homology to Known Proteins			TGTGCAGTTTGACAATCTACCAAGTTGTGCTT
Gma.4111.4.A1_a_at	BI426730		0	No Homology to Known Proteins			CTTAGAACCCATAGTCTTGCGATCAAGAATTTTCATTTTTGTTGTTTCATGCCATCAGCTTATAATCCTGGAGTTTGAGCCCCCCCCTTTTGGTTGAAATAATTAAGACTCGTTTGGATTGCTCATGCGTGGTTGAAATTTGATTGTCTAGT
Gma.4111.4.A1_x_at	BI426730		0	No Homology to Known Proteins			GATGACGACAATTTCCTGGGATAATCATGCCGATTGCCTTGTCATTTGAATAATTATGGATGAGAAATATTGGTATTGATATTTTCCCAAATTTAGGACCTTGATACTTAGAACCCATAGTCTTGCGATCAAGAATTTTCATTTTTGTTGTTTCATGCCATCAGCTTATAATCCTGGAGTTTGAGCCCCCCCCTTTTGGTTGAAATAATTAAGACTCGTTTGGATTGCTCATGCGTGGTTGAAATTTGATTGTCTAGTGAAAGTTTTGTTATATTTAAGCTATTTTAATGGTTATGCAAATCTTGATTATATGTCGGTTAAATATTGATTCGGTGCAGGATTTTAAAA
Gma.3993.1.S1_at	BG510822		0	No Homology to Known Proteins			TGGGAAATTCAAACATCATGGCAAGTTCAAGCATGGAAAGTTCGGCAAGCATGGGAAATTTAAGCATGGGAAGTTNGGCAAGGGTATGTTCAAGAAGNGGAAGTGATGATATTATATTAATTTTCTGTACATACAAACCGCGATTCTGGATGCTGCTGCACATTGCTTTTATAATAAACTCTACTTTGTTTGATGTCCATCTATATTTTGGTGGAACTCTAGTATTTTTTTTTATAGTCAAAGATGTATCATCCCGTTCATATTCTATTATTCTAGAAAGTGCTTATTCTAGAAAGTGAACGTCAAATAGATGATGCTCTGGATATTATGTGCGAGCTTGCAGTTGCTTTAGAAAANNANNNANTTGTTCATGCCTTTTCTGTTTNNNNGCTTTGTATA…
Gma.3355.1.S1_at	AW101624		0	No Homology to Known Proteins			GTAATGTTGGTCATGCAACTTTGGGGATCAATCTATTTGTATAAGGANNNNNNNNNNGTTATGAACGAGTTTTGAGTCTCTGTGCATATCTTATACGTTGTAGCTTTTTCCTTCAGGTTTCAACACCATTTTGTTGTATTGCATTATCTTGGAACCGAGAAGAGCATGGCTTGTAAATACGCACCTCACTATTTGTCAATTTTTGTCTGCTTGTGGATACATTCAA
Gma.3707.1.S1_at	AW317215		0	No Homology to Known Proteins			AATCTCTATGGACTTCAACCTGGTGAGCATTTCTGGCAAGTTATCTTGATCAGCTGGACATGGATGGGAACAACGTTATCTAGGTCCATCTTAAGCGTCTTTCTTCCCTTATTTTCTTAAGAGTCAGATATCTCGTTTTTGTTGCTTACTTTGAGGTGATTGTATTAAACCAAATTGAGATATTCATACAGCATGTAAATCTGTGAATTGTTGCAAGTCGGGACAACAGTTTGAGACTTATGTGGGAATTCATATCAAGTGGTTTAGTTCTGGACGAAA
Gma.375.1.A1_at	AW350435		0	No Homology to Known Proteins			GGCAAAGCATTTCAAATTCTGCATTCNNGNTCATGGGAGAGNACTNGGGGAATAGCAACGGGAGAGGGTGTGCTGAGAATGATGCAGATGATAAGAANNNNTGNAGNTATCGTATCAGGCCATCCAATGTTGTATCACCATTATTAAAATTTATGTCCTCTTTTTTATTCGTTTTATCATGAAGACCNACCATATTGAGGAANGNAGAGATTGCTGAAGCTGCTTTGAGGATTTGTTAATAAGCATTATTTGTCTCCTTGGTCAAATAGATGATGATGGTTTACCGTACCAGTAGAAAAGGGAAAGCATTCGCTTTTTTAAGGACTTAGTCTGTGTATGCTGACTCGGATGATAGTTAGTTTAAGCTGTAGGTGGTGAGAATCCTATCACCAGACTGAT…
Gma.2616.1.S1_at	BI317777		0	No Homology to Known Proteins			AATAATGTTTTGTTACACCATGTAGAATATTGCTGAACAGTGCAAATAAGTTTGTACTAATCTAATCACGAAATAACGTGGTTACATATTATTGGTGGAATAATAAGTTAAAGAACAAAATAAAGTTGAGCTGACGGGAAATCAAGGCAAGATCATTCGGATTGAGTTTCATCAATAAATTGCTGTACCATTTAGTAATTTCATTATATATAAATAGCGGTTGGAT
Gma.284.1.S1_at	BI946253		0	No Homology to Known Proteins			TTGTATACCTTGTAGCATTTTTGGGTTTTGTGAGACCTGGAAGTGGAATTACAAGAGGGTTTTTAATTTGTGAAGAACTGGTCTTTCTGCTCAATAAAGGTCGTGGTATATTCTTAGCTTCATTTCTTGTTGGTTCGGNGATAATTTACTGAATTAGAATTTTAATTGGTTACATTGTTGGGTTTTTCTGTTTTGCTTCAATTTGAAGGATGAGGCATGCAACTAAATTGTGTCTTGTTCGTTTTGAGGGTCATGGTTTAGGCATCAAAT
Gma.2921.1.A1_s_at	CD417900		0	No Homology to Known Proteins			AGTGGAGATGATGTGCTTTTCCATCTGCTACCAGCTTCATGACATTTTATGCTGTCATGGCTCTTATGATGATCTTGAGGTCTAGTGGCGAGGGGAGCTTCCATCTTGACTTTAGTTTAGCTTTACTGGTCTAAAGATTGCTGTTTTAGTGTGGGTTAAGTTATGATATTGAGAGTTTTGTGTTATCTAATTATGTACTGGTACGTTTTGTATACTTTTTGGTTTATCTTAATAGCT
Gma.2540.2.S1_s_at	BI787366		0	No Homology to Known Proteins			AGAGGAGCACAAAGGAGAACACCATGGTGAGCACAAAGGTGAACACAAAGGAGAACAACACCATGGGGAGCACAAGGAGGGACTTGTGGATAAGATCAAGGACAAGATCCATGGTGATGGCCATGACAAGGGTGAGAAAAAGAAGAAGAAGGACAAGAAGAAGAAGGAGCATGGACATGACCATCATGGTCATAGCAGCAGCAGTGACAGTGATTAGATCTTATATGTTAAGCAGGTGTACGGTA
Gma.2590.2.S1_at	CD414388		0	No Homology to Known Proteins			ATTTCATATTAGCTGCCTGCTGCGACTTCCTTATGCATAATTTTACTGTTTATAGAAATTGTGAAGCTATACTGTTGTAATTGTCATGTANATTGTTCCCTTTTTCATCTTACTTGATTTGGTAAACTCCGGTTACTTGTATCCAAATAAGATGGGCCATTTGTATTGCGGGGGCTTTGTATAATTGTACAATTATCTACTTGTAAGAAGTTCAGATTCGGGCGACAACATTTGTAATGCAGAATTAGGTCATTAACATTGTAAATCTTCTGGCGATGATTGGAATATCAATGTGAAGACGCTATATGACTTCTGCTATGACAATATCATTGTGGTTGTCAAGGTATTTTTGAAGAAATATCGTGGATTTACAAAGAATCTGGTTAGGCTTCTACAATT…
Gma.5813.1.S1_at	AW349069		0	No Homology to Known Proteins			TTATCAAGGTCCTCCTGTGATGGCACCACCGCAATATTATGCTGCTCCACCACCACGCACAAGACAAACTGGATTCCTTGAGGGATGTCTTGCAGCTCTGTGTTGTTGCTGCCTCATAGATGAGTGCTGCTGTGATCCCTCAATCTTATGTATCATCTGATGTGATCAAAATTGCTGCAAGTAGGAAAAACAAAATGAAGAAGATACAAGTACATATATATGCAGTGTGATGCTTCCAGAGGGCTTCAGTTAGCATTATGTTTAGTTGAATAGTAGTCTTACTTTTATCCAGAACTAGAACTTATGTTTGTGCTTGATTAACATGGTTTCTTTCCATCTTGGTCTTTGGTGNGGTNGNGCATCACCAGTGATTTGATTTGTAATGTGGAAAGTAAACAA…
Gma.5788.1.S1_at	BQ452881		0	No Homology to Known Proteins			ATGGTGCTTCCACATCAGATACTGGAGTCAAGCATGTCATCATACCAGCAACCTAACACTGTTTTTCTTGGCCAAGAGCAATTTGATCCTTCTTTTGATATATCTACCAAAAGTGATGAGGAATTGGTTAAGATTGGTGGCGGTAATCTGTGATTTCGTGTAATATGTAAGGTTGTGTTCTAGGACTGATTCTATCTTCCTTCTAAGCTTAGTTTGTGTTATATGTATTCCTTAATAGATGAGGGAACCTGATCTTCATAGATTCCTAAGGTTCTTAGTTTTCAGTTCAAATGTTCAACACTTGACTAAACATCCAGCCTTT
Gma.5672.8.S1_at	BI970927		0	No Homology to Known Proteins			ACAATATTTGTGATTCTGACCAAGTTGGTTCTATTTGTTTGATGGCCATCTTGCACGTCCTGATCTTATTGTGTTCAAGTGACAGACAAATCAGAACAGGGAAGAGAGATTTGAAA
Gma.5584.2.S1_s_at	BM732633		0	No Homology to Known Proteins			TAAGAAAAACGAAGTGTCAATCCCTTTCTTCTTCGTTTGTATTGTTTATGAATTATTAATTACTTTGGTTTTAGACAGTTGTATGGCACTGCTTTTGTCTCTGTCGTTGAATGATATCA
Gma.5584.4.S1_s_at	BQ610991		0	No Homology to Known Proteins			TCCACCCTACCACTACTAGAATATAGCCCTTTCATATCACACCCCCACATGGATGTATACAGAAAGTGTGAAAATGAAAGCCATGGAGGGGGAAGGTGCAGTTGCAGTTTGCAAATCCACAAAGAAGTATAAATGTTTGATTATTGTTATTGTTTAGAGGACTCTGTCTA
Gma.5585.1.S1_at	AW310156		0	No Homology to Known Proteins			AGAGAATATCACACGAATCCCACCCTCCCCCAGGGTACGGATCTCCTTACCCTCCACCCCAACCGGGTTACCCATCCGCACCGCCTCATGAAGGGTACCCTCCGCCGCCGCCGCCNCCTCACGGATACGGTGGGTACCCTCCGCCGCAGCCGCCGCAGCGTCCGCCGTACGACTCCTATCAGGGTTACTTCGATAACGGGCATCCACCGCCGCCTCCGCCGCCGCACTACCACTACCAGCACGTGGATCACCATCACCACCATGAGGAGCCTGGGTGCTTTTCGTTCCTCCGAGGCTGCATCGCAGCGCTTTGCTGTTGTTGTGTGCTAGAGGAGTGTTGCTTCTGATAATCACANCGTAAAAGTTGTTTCTTCAGTTTGCTGCACTTGGTTATGGCTC…
Gma.5226.1.A1_at	AW830583		0	No Homology to Known Proteins			GGAACTATGAAAATCAGCCTGCTACCAAGTAGGAGAAAAGAGACAACAGAAGTTTGCGTTTTGATGTCATTTAAACCCTGATTTATGAGCTCTGTATACTGTTTTGCAAGATACGCTCTCGCTAGTTAATAAGATTGAGTTTCTGAATGAAGTCTGGACTCTGGAGCATGGGCCCTCAGTTTAGAACTAACCTTCCAATGTTCTAGAAANCTGGTTCATNCTTCAGAGATCCTTACNTGTCTCTTTTGTACAATGTCAACNNCANATGCTTAATGTGGTTTCTAATCTTCCATTTCTT
Gma.5256.1.A1_at	CD408042		0	No Homology to Known Proteins			AAATGCCTCTTGTGGACGTGTGATGGAGGTCACATCTGTTAATTACAAGTGCTGTCATGGTGGTAATGTTGCTGACCATGCTATTAANNNNNNGNCNNCANCCGCAACCTAAAGCTTGAGTCATTCAACCAGGCTTGTTTTGGAGAAACATGAACTTGAATTCAAAGTGTGTTTCTTTTTTACTATATATATGTATGTATGCCTAAACAAGTGCGTTGCCCCTTACGGCCACTTCATTTGTCCTTGAATGGGCNAANATTANATAATGGCATCTTTTGTATGTTCTGA
Gma.5576.2.S1_at	BM307580		0	No Homology to Known Proteins			CTGCATTTCTTGTACTAAGTTCCTCTTGTCTTATGGATTTTCTGATGCTCTGTTAAGATACTATTCGTTTCCAGTGATGTAT
Gma.5535.1.A1_at	BF424135		0	No Homology to Known Proteins			GGGCATGAAAGGTATCCATCCACATGTTTTTACTTTTTTTTTTTCTTTTTCTTATTTCACTTGAATTCGTTTCAATCCATTGATTAAAGCTGGCTTCCCCCACTTGCCTTACAATTCCAAAAAAAAATTGGTGTGCTAATTTTGACATTGTGATGACTGATTGTGCCATACTATTGATGTATTATGATTGTACTTCATGAANATATAAGAAATACTGCATCTCTTTCT
Gma.5469.1.S1_at	AW349200		0	No Homology to Known Proteins			AACTCTCAGCAACATGCACAATCCTCCCCCGCCAGGCGGTCCAGGCCCTCACCACCACCCCGGCCCACCGGCTCCGCCACTACATGCTCATCCATCTCCTCCGCCTCCTGGGCCTCCACACCACCACCACGGCCCACCCGGCCCACCGCATGCTTATCCAACTCCTCCGCCTCCTGGGCCTCCACACCACCATCCCGGCCCACCCGAACCAGGCTTTCATCAACACCATGGCCCACCCGGGCCACCGTATGCTCATCCAACTCCTCCGCCTCCTGGGCCACCGGGACCTCCCCCTCCAGGGCCTCCACACCACCAACACCACCGTTGCTGATGTAATGCATATGGAGCTTATGAATAACGATCCTACATATATATGATGTAATGTTGAATGCTTTTTAA…
Gma.4346.1.S1_s_at	AW309773		0	No Homology to Known Proteins			TTGGAGCAAAGTTAAGCCTTTAATTTGTTGTACAAGTTCTTTGAATAAGAGTTTGAATATATCGTCTCTAAGCTACAATCTTCACGACTCAAATGAGGTTGCTTCGATTTATTTGGTAGCCATCTTTCACATCTTGTTG
Gma.4176.1.S1_at	BG046696		0	No Homology to Known Proteins			AAACCACCTCATCCTGTACATGGTGCCGGGGAGGAACCAACCTCCATTCCACGAAAGAAGGGACCAAGAAGGCCNCCGAACTGATGAGTGAGTCAAAGGTTTCNGATTGNNCNNNCNTCAAATGGTTTAACTTTGACTCGATCTCTACCACCACAACATCACGATATGTTGTTACAANCATAATCGCAATTTGAAACCTTGGGCTAGCTAAAACTATTTTAATATAAAGTATTAATGGTCACTGCTACATGAGCGTCTATGATTAAATAAAAAGTAGGGAGTTTGAACCCATGTAATACCATGTTGTGAGGTTCTCCCTCTNTGTGTGTGCTTTAAATTTTCACATNTAGTTTGATTTGTGTCCGGTGTGGTCTCTGTTTCTTG
Gma.4496.1.A1_at	BF219518		0	No Homology to Known Proteins			GGAATCAAGCTAATATAGTCTCGCATTTTGTCTGGCAGAGTGTTAGAATTAANNTAGATCAAGTGCCTACTACTCATGTACGTGATTAGTAAAGTAAATTTTGTAAATTTTAGTTTGTTTGAGATTTTACTGAATTGAACGAGCNNGTTGCATCTGGCTTAAATAAGTTCTATGNTTGCTTTTNTNNCAATTCTGACATTGGAGTTTATGGAATATAGGAAGTGACTTGGTATACTTCAAGA
Gma.5036.1.A1_at	BM526476		0	No Homology to Known Proteins			GGGTGATGACCAATCTTTCTGCTAACTTGGCAGAAAAGATGCGGTTTCGTACAGGAGGAGAANCAGGGTGAAATGGGGGGAAGGAGCAAGAAAGGAGATATCCCATGATATCTGCCAATACCGTAACTATTGGGCTTGCATGAGTTATTGAATGTTTTGGAGTCTATGGTGGTGGTCCAGATATTATGTCCTTTACTATTTTTTTTTCCTTTTACTANNGGCNGTAGAGTGAAACAATCATCTTAGTCCATCCATGTGTTTGGGACAAGGTAATGCAACATATTTTAGCCGT
Gma.499.1.S1_at	BM521834		0	No Homology to Known Proteins			TTCGTGATCTCTGAATTTCAATTTCAAAATTCATTTTACAAATTACTACAAATTTGTTTTGTTCCTCCTAGTCCTAGCTAGTAGCAAAATATAGGTTGTTCAAAAATTATCCATTCGTGTATTGAATTTTGGCTATTCTTTGGTCTATTGCCCAGGGAATCCTCTATCATTCTGCTTGT
Gma.6451.2.S1_s_at	CD400221		0	No Homology to Known Proteins			TCCCCTACCCTTCCGTGATGATGTAGATAGAGAATAAAAAGAGACCAGTGTGCAGTGAGAAAGAGATTGCTCACTTCTTGTGTGGGTTTGTTTTGTTCTTTGTGTTGGAATTTGTTCATGGGTGAAGAAGGAGAAGAGGTGTCAAGAGAGAAGGAACAATACATGGGAGTTTATGGAAATGAGTGGTTGTATTGTGGTTGCTNTGCAAATTGGCGCCGTTTAAGACACCAGAATTCCTGTTCCATGCCTTTTTTCAAGTGAAAAAAAAAAANNNNCAATTACTTGTTNTCTCTCAGCTTTTCTTCTTGAGATCTTAATATACATTG
Gma.6546.1.S1_at	CD392353		0	No Homology to Known Proteins			AGAAGCGTGAGAGCCTTAGTCGTTCAAGATGAGAGCTAAGTGGAAGAAGAAGCGCATGAGGAGGTTGAAGAGGAAGCGCCGAAAGATGAGACAAAGATCTAAGTAGGTGCTTGAGCAGGAGTTGAGATGAGCTTTCCATCTGCTACCAGCCTCATGACATTTTAGGCTGTTATGGCTCTTATGATCTTGAGGTCTAGTCGCTAGGGGAGCTTCACTCTTGACTTAGTTTGCTTTACTGGTCCTGGTCCTGGTCCAAGACTATTGAGTGTGGGTTAAGTTGTGATGTTTAGTGTTTTGTGGTATCTAATTATGTACTNGTTTTTATACTTTTTGGTTGAATAGCTATATATTAGTATCGAGACTTCCATGAAAANNNNANNNNANNGTATGCTTGAAGTG…
Gma.6262.1.S1_a_at	CD416257		0	No Homology to Known Proteins			TGCAAGTTCAAGATCAGTATCGAGGTCAAATACTCCAAGGTCTACCTCTCCTTCAACTTGAAATTTGTTGGTCCTATATGGCTT
Gma.6296.1.S1_at	CD400030		0	No Homology to Known Proteins			GGATGGATTAATTTGGTATTCTCTAACTAGGAAGTG
Gma.5929.1.S1_at	BQ610446		0	No Homology to Known Proteins			GGTGATATATATTGTACGTTGTCCATTTATTGCCGGGGAATATTTATAGTAATCTTTCATTTTCCTTTGTTCTTCCATCTTGTATTGTATGGATAGGATTATTGTTTTTTCTTCCTCCTCCTTACTTCATGTACTTGGGGATCATCTATTGTTATAGGATATT
Gma.7864.1.S1_a_at	BQ611662		0	No Homology to Known Proteins			AATCATGCATGCATGTCAGTTAAACCATATTATATACGGTCATGTGGAGAAAAGAACATGTCGGTGTCATTGTTAGTTTACTAGAATTATACCTTAGTATGCAAAAATAAGTTTATGCATGTGTTGTGTCCATCCTGTTTTTCTTTTTCTTTTGTACAAGTAGATAGGAGTCGTGCTTCTCCTTACTGTGTCCAATGTGCAATAATTTCCTTGAAGGGTT
Gma.8005.1.S1_at	BI426427		0	No Homology to Known Proteins			TGAAGGTGGCATTTCCGCGGTCTAATAATTAAAATGTGCCATTGTTTGGTCCCAAGAGACCATATATTGCCCGCTCCTGCCATGTGCGAAGTTGTATTCTATACAAGTTATAATTATGCTCGTGATATTTAACTTAGGTATTTAAGTGTGCTAATTTGGTGTACGACGTACAGTACCCTTTTTATCAACATTCTT
Gma.7266.1.S1_at	BI969207		0	No Homology to Known Proteins			TAAGCCAGGCCTTTTTTTTTCTATGTTCTATGGCCTCTGGTTTCAGCCTGTCTCTGCATCTTACATCATTTCAAGTATGACACTGTTCATTGTAAGTTCAAAACCCTGGTTTTTCATGTTGAGCACACTTGTCGAGGGAGATTTATTCAGACCAAAGATTATATGACTACTGGTCTATGTCAAAGGTTGACTTGCCAGAGAACATGATTCTGTATTGGCTGTGTAACTAAAACCAAAGCATAAACCCATCTATGATGTTTTCTCCTAAAGTAGTAGACCATTTTATGTTGCTGGAATGGTTTCT
Gma.7098.1.S1_a_at	BU544552		0	No Homology to Known Proteins			AGAGCAATGTCTATTTCCCTACTAACTTCAGAAACTGCTCACGGCAGCAAGGCATGTATCAAATGAAGAAGAATGTGTTAGAATTGATAAGTATCTTCGTTGGACAAACTATACATTGTAAAGTGGCTGTTTGGTTGGTTAGCATTTGTATGCTTTTGTACAAGTTTGTTTCTACACTGTTTCAATACCCAGTGACAGGGTTGAATATGCTACCTTTCTACTTTGACGATTGATTTGGAGGCTCTTGATCCTGATTGGAAATC
Gma.7185.1.S1_s_at	AW471611		0	No Homology to Known Proteins			AGGCATTCACGGTCTAGTAACTTGTCATTGTTTGGTCTCTAGAGACCATGAGCCCATTGCCACGAGGTTGTATTCTACATAATTATATTCG
Gma.720.2.S1_at	BG509704		0	No Homology to Known Proteins			GGGTATCATGATTTTCTAGCATCATGTAGATAAGATGTGCACTCTTTACCTTTTATTTTGTAGGTTCCTTGTAGCGTTTAACAACATTTCTTTTTTGATGAACTTAAGGGTAACAACATATTGTCCAAGGACATGATTGTTTACTTGTTCCTGAGTATCGGTGTGGCATCTTAATTGTCCAAGGACATGATTGTTTACATGTTCCTGAGTATCGATATGGCAT
Gma.6814.1.S1_at	CD397900		0	No Homology to Known Proteins			GTGCTGGCCACGCCGCAGAAGTCTCCTTCGCCGGCGATTTCTCCTTCCGCCGTGTCACCGTCATCCTCTCCTCCTGCTCCGACGGTGAACGCTCCGTCTCCTTCGCCTACCTCCGTCGACTCTCCGCCATCTCCTCCGTTGTCTCCCTCCGATTCGCCGGCCGGTGTTCCCTCCGTCACTCCCTCAGCAATCTCCTCTCCGCCGTCTGAAGCACCAGCTCCCTCTCAAAACGGCGCCGCTTTGAACAGATTCACTGTCGCTGGATCTGCTGCTGTTGTCGTTTTCGCTGCTGCTTTGCTTATGTAGAGACTAGAGAGGGTTTCGTGGAGTTTTTTTATTTATTATTATCATCGTTCCGAATTTACGCGGATCGTGAATTCTAGTAATT
Gma.6676.1.S1_s_at	CA819837		0	No Homology to Known Proteins			TTGTGGTCCTTTCAGAAGATGATTGGGAGCTTAGTATTCGGATGTGCTTTGCTGTCCTTGTTGTTCTAGACATCATCGATCTCTGTCTTCGGACTTGCAGATTTTTCTGCCAATTCATGTTATTTTTCTATTTACCTTACCTTTATATATTATTATTTTGTGGATGTGATCATGGGAGTTTATTAATTACTGTATTTGAATTATATACGTACATTGCTTGCATTCTTGGGAGATTTGAGG
Gma.6883.1.S1_a_at	BE658807		0	No Homology to Known Proteins			GGTTTTTGGTTGTTATGGGATGCTTGTGTAGCTGTCTTTGTTGGTTAAGAA
GmaAffx.8295.1.A1_at	BE822089		0	No Homology to Known Proteins			GTCTTTTGTGGTGTCATCGTGTTTTATTTTCGTTGCCTATGGAGTATGTATGCAATTTCTATTCTACCTATGTACTTGCAGAAGAAGTCTTTTAGGCCAATT
GmaAffx.83798.1.S1_s_at	CA800345		0	No Homology to Known Proteins			ATATTTTATTTCTGGCTATTTCTGCTGTCATGGACCCATGTTTCTCCTTGGAAGAAATAA
GmaAffx.84342.1.S1_x_at	AF047053.1		0	No Homology to Known Proteins			AATTGTGTTTATTTTGTACTTCAAGTTATGAA
GmaAffx.77770.1.S1_x_at	AW119465		0	No Homology to Known Proteins			GTAGAGAGCTAGTTCAGGTTTTTCCTCGTTCATTTCAGGTGATTGCTTCATTTGTATCCGTAGTTGTATTCAGTATTTATACTTATTTATTCACAAT
GmaAffx.78938.1.A1_at	BU550637		0	No Homology to Known Proteins			TGTTTAAGGCTATTTTACTGTTTTGGATAATTTAGATGATGGTTTCGAGAGGTATTATTATGGGCTGATTAGTTTATTTCTCTGCTCACAGTATGATATGTTTTTTGATATAATTTTGCCAATGGATTTTTAGCTTATTATGCGCATATATGTTAGCCCCTTTTATTGCCATGTGAGTTTTTTGCTAGTTAAGTTGGGATTGTCATCACACTCCTG
GmaAffx.79047.1.S1_s_at	BU763803		0	No Homology to Known Proteins			ATACTATCATCGTTTCTCGATTCTCATTGCTGACGCAGTGGAACATTATATACTATATGTTTGTGTATATTTAACCGAGTTCGGTTGGCACTTGTTATGTGGACTCCCCCTTTGAGGG
GmaAffx.80234.1.S1_s_at	AW396690		0	No Homology to Known Proteins			TACTCAAATGTTGATGGGTTATTTAGTTACTCATTGTTGATGTACTACCCCTATCTTGTATTAGTAAAAGAGAAAATTTGTGATGTGTACTCACCGTCGGTGGATTACCTCGTAGTAGTAA
GmaAffx.86675.1.S1_at	BI424294		0	No Homology to Known Proteins			GGTTTTGAGATTACACTTCTCTGATCTTTTCTCTCCAAAATCAAGATCAAAATCTGTAGAACCCTTTTCCTCCTTAGANNNTCTCTCTCTCTTAATTTCTAATTATATCTGACTTTTATCCTCTCACATCCACAAATGTTTTTCTCAAAGAATGTTCGTAGATTCTTCAAATTCAGAGGCCAGGTTTTTTGCCCATGTCTTNTATACTGTCTTTTCAATTTCTGATAACCTATTCACCCTCATCAAACTCTNTTCATCATCATCCACAAGAATTTTCAACCAAAACACTCATTAGTCTTTTGGCTCAACACTCAACAANTTTCTTTGGTGTGACCTTATTGCGGGACAACACACAATAATCATT
GmaAffx.87086.1.S1_at	BM091829		0	No Homology to Known Proteins			AAATACATGTCCCTTTTCCTCCTAGTAATACTAGGGATGGCTTTTCTGGCCACTACTTCCCTTGCTGATCGTCGTTTTCTTTCGGTGGAAGATGGTCATGATCACCATCACCACCACCCACCAAAAAAACACTGGCCTCCAACCACACAAAATGAACCTTCAAACGTAGAAAACAAGGAGAACACTGAGGTGGAGGATGGTCATGATCATCACCATCACTACCCACCTAAAAAA
GmaAffx.8804.1.S1_s_at	BG362617		0	No Homology to Known Proteins			TTCTACCATTGTGAAAATTTCCTGCGACTTGAGAGGCGTGCCCTTGTGCTTTATAAGCAGTCCTGTGTAATGTGTATGCAGTCATGTCAGATACCATTAGTATGTGTATGTTAAATAGTTGCTGCTTATTTTATACA
GmaAffx.84747.1.A1_at	AW349406		0	No Homology to Known Proteins			GAAAGTTTCATTCAAGATTCCGTATCATCGTTGCACAACTAGAAACTATCTTATTTTGCGTCTAGGGAATCATTTTCTTGAAAATTTATTTACATGTACTGTTTATTTTCTAGGTCCGAAATTTTGGATACTATTTTTGAAGTTGGAGTAGCCGTTTTTTTTGTCAGTTTCGTGTTAGCCTGAATTGATGTTTTACCATACT
GmaAffx.84855.1.S1_at	AW459549		0	No Homology to Known Proteins			GTAACAAAGTGGTTTAGACATCAATAGAGGTGGTGCTTAATTATCANATGTTGCGGTGCATTTCTGTGTGCATCACCTCGTTACCTTTGACTTGTTTTGAGAGTACCATGAGAATC
GmaAffx.85382.1.S1_s_at	BI945154		0	No Homology to Known Proteins			AGACCTGGAACTTCACCTTTCTACGTACGTGTGCTGTTAGGATGCAGTGTGCTTTGATGATGCTTTGATGAATATGCAGTGTGCTTTTTT
GmaAffx.85497.1.S1_at	BG508375		0	No Homology to Known Proteins			AATTATGATCCTAAGATTTTTACAAATAACGGGAAATCTGTTTGGCCATGCGACGATAACTTTTATCCTTGCTGTTAGGGACCTGCTTTGTCAAATCAAATTTGTTTTCAATTTGATAATCATCAATCAATCCCTTT
GmaAffx.78433.1.S1_s_at	BM954579		0	No Homology to Known Proteins			AAATATGTGTCTGTACTTTTCTCTATTACTCGTGTGGAAAACTGTGGACAATTAAACGTTCTATATGCAAGTGACTTTTTTCTTATGTGATTTACTTCCACAACTCTTGGTTAATTAGAAAGAGGATATATGTGTGCTTTATCAGGAG
GmaAffx.78465.1.S1_s_at	BQ081690		0	No Homology to Known Proteins			GTTATGCTTGGCTTAAAGATTTGTTTATTTAAAGGTGTGACTTTGGCTTAGGAGACTAGAAGAGAAAATAGATGAGGCATGCTTAATAGTTTGTTTAGTAATTTGTAATGCCTGTATTCATTTATGG
GmaAffx.78601.1.S1_s_at	BQ627607		0	No Homology to Known Proteins			ATTCCTTGAGTGTTCCTTTTCTGTCTTGTGCATCCTTAGTCATTTCTCATTTTACTCTTCATAATTAAGTACTCATCTTCTCTTGTTTA
GmaAffx.78636.1.S1_at	BQ627652		0	No Homology to Known Proteins			GGTGGCTGCTAAGTGCATGGAATATGAGACAATTAATTAAACCTGCAGCATGCATGTGTTGGAGTTCCCTTTCTCAAGGTAGAAATAATAANTCTAGTGGAGATGTAAACTACCATATTTTTAAGTTTGGTGGGTCAGCATAATAGTGATAATACTTCCCTTACTTTTGCTTCTTAGTAATTTACTAGAACGTGGGTTTCTCGGATGTATTTGATGANATATGAGAGCGGTGAATGGTGTATTTTTTAT
GmaAffx.75093.1.A1_s_at	CD407666		0	No Homology to Known Proteins			TTCTATCATTTGTGGCTATTTATTGTGCCTGCAGATTTATCTGTCATAAAGTAGGTAAATATCTGACATGGTGAAATATTTAGAGTTTTTAGTTCTAGTCTCAAGGATCTTAAATAATTTTAAACTTGCAAGCTTGTGGAGAAAAGGTAGCTTGTTATAGTTGTATTTATTGTTTTTACATTAGAGACCATACCTTCAAGTCGGATGTTAATTACATTCCTAGCAATCGAATATTGTCC
GmaAffx.7517.1.S1_s_at	AW733377		0	No Homology to Known Proteins			GAAATTTTCTCTATCCTTACCATTAATTGGTAGTTTTTTAAGTAGAGACGTTCATGTGTCTCTCCCGTGTTGGCTAGACTTTTAGCACTTATTATTTTACCACCAAAAAAAATCTCCTTTAGAATATTGTATAA
GmaAffx.75481.3.S1_at	BU091049		0	No Homology to Known Proteins			TAGTTTTGGGTGTTGCTCCCATACACCATCAACCGCGGACTTGTCCCCAAGGG
GmaAffx.75881.1.S1_at	AW598783		0	No Homology to Known Proteins			GACTGTCTTTTTTAAAGATCATCTTGTAGTTGTAACATTAAATAGTAAGTTGCACTGTTGAGTTACCTATCCACACATTATGATTCACAAGGTCTTATGAATGCTAGTTTTGCGAGTTTGTATTCCACATGACTAAAA
GmaAffx.76231.2.S1_at	BI942390		0	No Homology to Known Proteins			AAATAAGATCTTCCAACCGCACCCATATTAGGACATGTAGGCAGTATCGNNNNGNGGTGAAAACAAGTAAAGAGGCACTTCCAGCACCGGGCAGGTGTCAGACTCTAAACATTGTGTTACCACTTAGCAGAGTCCTGTGTTTTTAATAAACAGTCGCTACCCCCTGAGAATCAAACACCCAGCTCATGATAGAATAAAGAGACAAAGCCATGGGTCTCCAGCAATGCTGCCGTGTCATGCAAACCCTGCAGCATCAACATATGTTCTGTTGATCACAGGAAATAGCTGAGACATTGATAGCTTCCAGTTGTTTTTACTCCTGAC
GmaAffx.76350.1.A1_s_at	BE555004		0	No Homology to Known Proteins			GTATAGCATGCTTTGAAATTCATCACTTTCGGTCATGTATATCGACAGATCTCTCATTCATGTCTTGACATAGTTCTGTAATTTTTACTCCATTGAGGGAAGCATCTTAAGAAATGTGTTGGATCGTTGATACCCATGAGAAAGTGGGTGACTGAATGTATACTTGAG
GmaAffx.74274.1.S1_at	BQ785389		0	No Homology to Known Proteins			TGTATGAACGTGTGTCTATGAGCTTCTCAATTTCGCTTCTCTCTCATTGATGTCTTTCTTAGACAGAAAACGTAGAAAAATAAGCAGGAGAGTTAAATGTGTAATAATCAACTTGGAGGTAATGTTTCTCAGTTAGTTACCTGTGTGTGTCCTTATGCCTTTCTGT
GmaAffx.74678.1.S1_at	BM522927		0	No Homology to Known Proteins			CACTTCCTAAGTCCAAAGCGAACCTCTTTTATTTTTATGGCTCAATAATGTGATCCATGAACCTTTGGAAACATAGCAGAACTGTGGTTGAAGCTTGTATTGGTTTCTTCTTGTTATATTTTTGGTGGTTTTAGACTCCCGTGCCTGTTATTGGCTCGCTATGGATAACTATTTGCAAACTTGTGTTTTGTTATTATG
GmaAffx.74679.1.S1_at	CA782166		0	No Homology to Known Proteins			CTGCGCTATTTTCATGAACCATCTGTTTGCTTGCTTTGTGTGTTACTTTATCATATTCATTCCTTTGTATAAACTCGAATGAACTCTATACGTGGATGCGCAAA
GmaAffx.74827.1.S1_at	CA802422		0	No Homology to Known Proteins			GGTCCTGCTTGAAAACAACCCGATGAGTAGGACATGCTGCTGCCAGTGCAAGGCGATGACAGACTCTTTCACATGGCCTTTAATTTGCTCAAATTAAATGGAGCCATGCTCCCTGTAAAATTCAATGCTCTAGATTCTGTTGGCTTTACTATTGGCCAAATATGTTCTTTTCACACATGTTGG
GmaAffx.73185.1.S1_at	BI701903		0	No Homology to Known Proteins			GGATTGCCTCATTGGTCATAGTTTGGAGTCAGAGTTCTCGTTTGGCTCCCATGTGGCAAGAATGCTCTATGATGTGAGCCAATCTGTGTCTGGCCAAACAGGGAATAGCAACAATGCTGCTGTTAATTGTCCAGAAAGCAATGGTTATCGTAGCTGCTTGCCATCTCAAAACGGTGGTGGCCCTAACCAAAATTGCGGTGATTACACCAGGACTTGCTAAGAAATATATTACCAGCAGGTATTTCANTTCTGATTTCAAGGTTGTCATATTATTGAGATTGTCATAATCTGAAGATGCGTGTAATAATTGTTGCTGTCGGTTCATACTTGTGTTGTGGATGTATTATTGTGTATCACATGTAGTCTTGGTTATTAAATGTTGATAAGAATAGTATTCCA…
GmaAffx.73401.1.S1_x_at	BI971895		0	No Homology to Known Proteins			TAAGAAACGTATCAGTTTTTGGTCTTAATAAGTGTTGCTCTGCTTTGCAATAAA
GmaAffx.73658.1.S1_s_at	BM307163		0	No Homology to Known Proteins			GAAATGGTTTGCACTTTGCAGTCAAGATTATGTTGGTAGTGTTTTTATTTGATTTGTTTATGGTTGGCTCCACCACATGCTTCTAATGTTTGAATTTCATCATGGAAGACTTCCATCATTACATTATATTGAAGCATTTCTTGCGCTTAA
GmaAffx.7160.1.S1_x_at	BE059130		0	No Homology to Known Proteins			TGCTTTTTGTTATGGGGCAAATCACTGTTAGCTTTGGCTGTAATAANNCATATAATGCTTTGTATTATGAAATCTTAGTT
GmaAffx.68672.1.S1_s_at	BI945193		0	No Homology to Known Proteins			TATATAGTTTGTTTTCCTCTGGCCTTTGCTGATGATGCTGTGTCCATTTTTGTTTATCTTTTGTGCATATAGTATATAGTATATAGTATATATATGAATATGTTTACGAGTTCATCAGTTGAGCGGTTTAAGTCCTGAGACGATCGAGGTAGCTGTGTGTGTGGTTTAACAGCTCAGTCTTGTTTTACTGTTGAACTTGGTTATGGTTCTCAAGCTGTAAAT
GmaAffx.66239.1.S1_at	AW101381		0	No Homology to Known Proteins			ATGGTTGTACATGCTGTATCCGTGTTTTGATTCTGTAACATTTATGCATGATTTGTTCCCCGTCAAAAAA
GmaAffx.69055.1.S1_s_at	BI426205		0	No Homology to Known Proteins			TTCGCAGAATTACTAGATGACGTTTGGGAAGCAGTTTTCCATTTGGCTGCATAAGTTATTTTAGCTATTAAGGATTTCAGAGTTAGATATAATTTTTCTGTACTGTTATAGATCCTTGTTTCCTATTCTGGTTTTTAAGTTTTGATGGTGGTAGCAAGTATTTGGCGTTTTTGGTATTTCCTGGCGACATTTTTATACAGGACTGTAGTGAAAGTACTTGGATTTGAAGTATATGAAGAGTTATATGTGATTACCTTGTCTA
GmaAffx.69182.1.S1_s_at	BM525748		0	No Homology to Known Proteins			TTATTTGTTGTAGCTACGCTTGTCCATTCTTAGTTCCTCAATTGCTTCTCGGGT
GmaAffx.70057.1.S1_s_at	BU765822		0	No Homology to Known Proteins			TTGTGTTAAATTTCCGATTATGAAATTGTGAGGTCTTGAGTTGTCCTCAGCAACAGATGCATTATGCTATTCTCTTTTGCTCTGTTTTCTGTTATTACATCNNNNNTNNTNNTTTTNNTTTTGTTTNATCTCCATGCATCATAATTGAAGTTATACATTTATACTCTGCCAGATGGTTCTTATGTAATGAGTTGTTTCCGTGTTAAGAAAGAACTGCTCTTTTAGAGTTCT
GmaAffx.70371.1.S1_s_at	CA935090		0	No Homology to Known Proteins			TCACCTTTGCAGTCACCTTCGTCAACTGTATGATGATGCTCTTTGTTCTTGATAGTCCTGAGAGCAGTATCAAATGTAATGCACAGTTGTTTCTCTTGAATAAA
GmaAffx.52033.1.S1_s_at	BI945149		0	No Homology to Known Proteins			AAGAATATTGCTTAGTGCTCCTGTTAGTTGTGGCATTTTCTTTTGTTCCTATAGTTCTATATGAATAGTTGGCCCATAGGCCGTGATGTTTGTCAATTGA
GmaAffx.52493.1.A1_at	AI856188		0	No Homology to Known Proteins			AAGATGTGCATCCTGGTGGGCAACCTTCACATTTTTTGTGTGTTTGTGTTCATTAAAATTCAGCAAACCACTTCTCCAACCACAAGGACCCAATTCACTATGGCTTGCCATATTAGGAATGTTCAGTTTTACTGTGTTTGTATCTGCTGCTTCTGTTATGGTTGTTGTTGAAGCACAGTTCACTCGTATGCAGATAACTGTTATGCTCAGTGCCTTCTTGGCTCTGCTGTTAGCTTAATTAGACAGTTTTCATATGTGTACTTATGTTTCCTTTAGCCATGGCGGAAAAAGTTGTTGTAATCTTTTTATTTACATAATTTCATTCGCATAACAATAAAACGATGTTTGGGTATGTGCTAT
GmaAffx.51535.1.S1_at	BI701497		0	No Homology to Known Proteins			GTCCTTATACCATATGGAGGTGATTAAATGGAGCTCCACTGTGAATTTCAGCTAGTGATTGTGGGTCTTTTGGGTGGCCATGGTGATATGGGGTATGGTAGCAGTAACTACTACCTACCAATACCCTTTTTTTTNGTTCATTGTATCTCGTGAGCTTGGTTCTTATCCCAAATGGATAGCATAATTTATAGCATTGAGTTTTAAATGTTACCAATAGAAAAAATATTTATTTTAGATTAACTCTTTAATATCATTGATTCTGCTGTATATCCGTTAATGCACCGTTATTTGTGAAAAGCTCCT
GmaAffx.5160.1.S1_at	BM270197		0	No Homology to Known Proteins			ATCTCTTCCGATGAGCCATGTATTAAGTGCCCTTTACATATGCTTCTTATTCTTATTCGTATCCGGTTTATGTTTATATGTATAAGACATTTATAAAATCAGGGTTTTCAGTAACCTTTATGTTACTGTCTCTGTTTTGTTTCACTTTTCTTTCTCTTCTAATAAATTTCTTTGCTCTTCT
GmaAffx.55090.1.A1_at	BI967937		0	No Homology to Known Proteins			TACGACGTCGGATCGGGATGGAACAACTTTGGTGCAGCCGGTGGCCGGTGAATCATGATTAGGGGTTATTATTTTTTTTAATTCGCAATTTTAAATAAAATTGAAAAAATATAGGCAGGTGGAGGTTTGAAAATTGAAATGTGTTATGGCCGAAATGTAACTTTGGCTGGCAATTGTCTAGTGGGGCACAAATGGATGTGGAACACATGTGTGACCNAAGGGTGCATTGCAAGTTAATGATGTA
GmaAffx.55403.1.S1_at	BM271453		0	No Homology to Known Proteins			ATATATACTTCCTCTTAAACTCCCAAAGTTTTTCAAGATGATTACTGTACCGACCTTTGTTTTTATCCTCAAGTCCTCTACATTTTTGTGGTTAGTATATTGAG
GmaAffx.55934.1.S1_at	BQ612922		0	No Homology to Known Proteins			GTTAAAATTTCACCATTCAAAGCCTTGATGATTCTTTCTTGATTAGATATTTGGAATGTGGCTGAATCAGATTTTGGCTAGCTGTATATCCGTTTTTTTTGTATGTAGTGGTAAATTGGTATGGAACAATATGACAATATCCGGTTTCCTTTT
GmaAffx.53445.1.S1_at	BE058743		0	No Homology to Known Proteins			AGTATGCTGATTTCCATGACATTTAAAAGCATTTTATTGACAAGCGGATTATGAGTTGTCATCTGCCCCACCACAAAAGATCTTTTTGTAGAAAGGAACTAATTGTTGTGCCAGCAGAGAACCTTATTTTGTTATGTTATAAGAATATTGTTCTGTTCCCTGTCCCTCCCCTTCTATTATATGCTTTACTGGGATGGGGAATGTTGCAGAGTAATGAATGTTGTTTAGCTTTATATGTTCCTCCATTATGTTTATTCAAGGTTTTATATTTTGTCTCTGCATGCTGCGTGCTTAATTCAACTAATATTCAATCAGGTATGTTGCTGAGGTTTTTCA
GmaAffx.50095.2.A1_s_at	CD417493		0	No Homology to Known Proteins			TACGCACGTTTCTGTTAGGGTTCAGGATTATTACAGTATTAGTATTCTTTTTTTTACCGGTGTAGTGAAATACATTACTGGAGAAGAATAGTGAGAGGAGCATATATATCTATATGTTACTACAGCTTTATTAAAAGAAAAACTCTAGATTGCTTTTGCTTTTCCAATTTATGTTGTCGGTTATGGATACCAAAAAAAAAGGAGGAATGGGATTGTTTGTGGTTGTGGGTTGCGAGATTACATGTGATGATTCCGCTGCAATCTACCGACACTA
GmaAffx.50677.1.S1_s_at	BI971744		0	No Homology to Known Proteins			CTGTAGTGTAGCATGCGAGTGTATTGGTGGTAATTCAAAAGTTTGTATTAATCTCTT
GmaAffx.48348.1.S1_s_at	BI945215		0	No Homology to Known Proteins			TTTTTCCCTATCTTGTGATCTATTTATGAGNGAGAAAAACAAAAGTGAGAAATTGTGCGTGTATCTGGTTGCTAATTCGAGTGCTATTAGTCTGTGGTTTGGTTGGTTTGTAACCCCGCTACTTGGGTTATGTTTGATT
GmaAffx.4882.1.A1_at	BE820482		0	No Homology to Known Proteins			TGGAGCTACCAAGGCCAGTTATTGGTTCTCTCTCTGACTATAGNCTATTTATTGTCCTANGAAGTTATTTCTGGTTTCATCCCTTGTGNACTTTTTCAGATACTAATGTTNCANCGNNTNTTTTTNCATAACCCTTNGTCGTGGAACTANATNGTNAAAATTGCAGTATTTAGTGTANANNANANNCCAGTNNNGGTATTTCTTAGCGTGCAGGATACCATGGGAAGCATTTATCAGATA
GmaAffx.43949.1.S1_at	AW569516		0	No Homology to Known Proteins			GTATTCGATTGACCCACTTTTAGAAAGTCCGTCTTTCTCCTCTTCATCAGAAACCAGGTGAAACAATGATGACTTTGATCCCATGAACATATTTCAGCTTGAGATTTGGAACTGGGAATGACTTAATTTTTACTTTTGCATACATGCATTCATGTATGCATTCAAA
GmaAffx.4631.1.S1_at	BI427495		0	No Homology to Known Proteins			AATACAGTTCATGTTACCGACGATATGTAGTCAACTAAGTCATGTTTATTTTTGTGTTGTGAAGCATTTGGTGTCCTCTACGGACTTAGAGGTCTTGTAATACGGCTCTTTCGCATAGAACGAGTTTTTTTCTTTCTTTCTCAAACACGTGCCGAATTCTGTTCAGTTCATACTCTTTATACATTCCTTGGAGTGTT
GmaAffx.46992.1.S1_at	BU083062		0	No Homology to Known Proteins			TAGTGTATTCAAACTTTTTTCTAGATACAAAAAACAACCTTTTTGTTTTTTCACATTTACCAATAATTCAGTTTGCCTCTCATAGTTTGTTTTATTTATATTTTTCCGTCGGCTTTCGCAATTGTAATACTAGTATCCTATATAAAATTGTAGCCTTATTCTATGCCTTTATAAAA
GmaAffx.67375.1.A1_at	BE659769		0	No Homology to Known Proteins			TTTGTTGGCTGGATTTTTATGTTAGTGTTTCGTGTTCGTGTTCATGTTCAAACATTTGATAATGATATGCGCTGTTTTTGGTGCTGCTTTTGTTTTTACTCATGAATGCGTGTTCTATTTTG
GmaAffx.66492.1.A1_at	AW349357		0	No Homology to Known Proteins			GAATTATATATTTTACTGGTCACAAAACAATCAGCCAGTTGTCATGTACNNTGTGCCCTCTCTTCCACCGTTTAATTCTGTGCTTTTATAGAACATCTGAAAATGAATGATTATGGCATTGGTCTACTTCTCTAGGCTTGCAAACACGGTATCAATTTATCAAAGTTTTTACATCCAAATTTCTCTAATTTTATGTGGTATGCGGTATGCCACCTAAAGATCATTAAGTCAGTAATTTCGGCAGTGATTGTGTGTTT
GmaAffx.6522.1.A1_at	CD394786		0	No Homology to Known Proteins			TGCCGTTTTGTTAACTTGCGTTTATACGATTGCGTCTTTGTTCGGTTTTGTGGTTGCAGGAAATAACCAAATTGGTT
GmaAffx.65393.1.S1_s_at	BU760770		0	No Homology to Known Proteins			GTTTACTAGTGTGATTGGATCTCCCGTTGAAAACTCAAAGCTATGCTTCTGTTGAATTCACTTTCGCCGAATAATAGGAGTATTTTGAATCTTTCTATGCA
GmaAffx.65892.1.A1_at	CD406505		0	No Homology to Known Proteins			AGATGAGGAGTCTCCACAACCACCTTCTAAGAAGAGGAAATGAGAATTATACTAGTATGAAAAAATTGTCATCTTCCTGCCTTTTGTAATGCTTTCTAGTTTTTAGTCAAATTTAGTTCTTAGGACAAGGATTTACCAGCTTGGACCTGTCACCCCATGCTTTTATTGTCTAATATCATAACTTATAAACATTAGTATATTCTCATGTTACGATGTTGTTAGCTTTGGAAGGCATTGTAGTCTGTGGCAAAAATGGTTCAGGTCATGGTACTCATTTCCTTTTTCGTTGGGCTTGTAAGTCTGCCA
GmaAffx.65918.1.A1_at	CD412482		0	No Homology to Known Proteins			GATTGCGATATTATACCCTTGCGGACCTAGCTTCGATCTTTAGTTCTTACCGACTATATATAGCTA
GmaAffx.54085.2.S1_at	BQ629483		0	No Homology to Known Proteins			AAGGAGGCAGGAATTGCATGTGCTTGGTAACCAAAACCAAACAAAGCCTTAAGANGTTCANTTTTGGGATGATGNGTTNTTCTCNNAGACANCANCAAAATCCAAAACTGTTNNTTTTTTTNCGTGATCTCTTNACTTTTCTGAACGCCACACAGATCCAANNNNNNTGGCAGAGCTGCTACTAATCACATGCATCTCACTACTTTTCCTCATTCAATA
GmaAffx.5716.1.S1_at	BQ611417		0	No Homology to Known Proteins			TTTTGGAGATTAAAGGTCACAGATTGAANNNNNNNNGTGATGGAGATGGTAGTGGNGGGNCTTTGCTGTAAATGAGGACACTTTTTTTTNTNTCTCTCAAGTGTTGCACTCTCTCTTGGTGATTGAANGCANGCNCATTAGGCAACTGNGGTCCCACTTTCNNCCCTCCTTTTTNNCATTCTTTCAAGGTTGCACGCATATCATGCTGGCATCTACTCTAAAAGTAACAAGAAAGTNTCCTGATGTTTGGCANAGTGANCNTAGTGTTTCATNATGAGTTNCTNNGNCCCCCTTNGTTTGGATATNTAGCATTTTGTGGTAAAGGTTACTTTGTTTTACATGTTGAGGGNNAGNGNGGAATGATGANAAGNAATNCTAGTTTCTGCTTTGTAATTCATA…
GmaAffx.57755.1.S1_at	AW706534		0	No Homology to Known Proteins			TAATGGGATTCGTTCCATCTTTCGGGACTTGAGTGGATAATTTGATGCAATCATGTTTATGAATGGAAGATGGTGGTGCGCTACCTTTTTTGTAA
GmaAffx.5824.1.A1_s_at	BQ298207		0	No Homology to Known Proteins			AGATGGATTGTTGGTGGCTGCGGATGGTGTTTTGTTACTAAGTTTTCTTTTTGTTGAAGCCTATAGGTTATTAGGGAAAAATAGGTGTTTACTTGGTAGTCATATTAATTGTCATTGGCAAATACTGCCTAAGACACTGTGAAGGTCTGGTTGTTAGAAATTTGGCATGTATTTGATTTTTTTGGATCCTTTATTTCTCGTTTTATTTCTGGTTGTGCAGCCACTTT
GmaAffx.58988.1.S1_at	BG237453		0	No Homology to Known Proteins			TGCTTTTATGTGTTGCTGGTACCATTTAAGGTGATGTTTTGAGCCACAGGACATCGATTAGTGCAAATTATCTTGTTAGTCCTTCGCAAATTGGCATCGTAATTTTGTTTTGAACTGTTTTTGCTACTGATGAGTTATA
GmaAffx.59014.1.S1_s_at	AW733977		0	No Homology to Known Proteins			AGGAGAGCATCATGTTGGTGAGCACAAGCCGGAGCACCATGGAGGAGAAGAGCACAAAGAGGGGTNCCNNGACAAGATCAAGGACAAGATCCACGGCGAGGAGGGTGGCGCCACCGCCGAGGGCGAGAAGAAGAAGAAGAAGAAGGAGAAGAAGAAGCATGAACATGGCCATGACAGCAGCAGCAGCAGTGACAGTGATTAGATTATCTCCCACTGCTGCATCACCTATATATCTTATAAGGTGTATGGGACCATAGTAGTGAGGGCTGTGTCTTTCTCTTTTTTTCCTACTTGTCATTTATATTTATGAGCGAGAGAAATAGTGCGTGTATCTGGTTGCTAATTCGAGTGCTATTAGTCTGTGGTTTCGTTGGTTTGTAACCCCTCTGCTTTGGTTAT…
GmaAffx.5944.1.S1_at	BU546557		0	No Homology to Known Proteins			AACAATAATGTTCCTCCGAGTTTAGGTCNTCCGAATGGGCAACATCTGAACCNTGAAGCTTATTCTTCTNCCTTGGGNNCATTCTCCTCATGCCAGACCTCCTTTCTAATTATTGAACGTGCTACATGGCAACAATTAATATATTATTATAGAAGGATCATATCATAATATTATGATATGAGTAAGTTAATTAATTAGCTCGAGACTTGATTTATATAATAATAATAATAATGATATGATATGCTATTAATCANANNNNATTTGTATATTTAATTTACTGCAACCGCTTCCGATCTGGTCTCACCTTAATAAGCAACCTGCACAGTGGCCATGGGCGTTGCTTCTTTCTGTAATTTCTTGAGTGACTTTTTAGTTTTCTATCACTCTAGCCATGTCTGC…
GmaAffx.59763.1.S1_at	AW620896		0	No Homology to Known Proteins			GCTTCCTCTTTTTTATACTTTATTGATTGTATTTTGCCATATCATCCGACTTTTATATGTATTTT
GmaAffx.59763.1.S1_x_at	AW620896		0	No Homology to Known Proteins			CGCCATTTGTGGTGTTTGTTTGTATAATTAGGTTTATGTTTACTTAATAAAGCTTCTTAAGCTTCCTCTTTTTTATACTTTATTGATTGTATTTTGCCATATCATCCGACTTTTATATGTATTTTTTGGGCTGCTGAAACTGGTGCATGTAATGATTTGGCTAGCAATGCAGTGTATTTCATGGGTC
GmaAffx.60153.1.S1_at	BM523538		0	No Homology to Known Proteins			ATATATCTCTGTTTCTTCTATCTGGGAGTTGCTCTAGCAACAGTTTTTATTACTTTTTAATTAATATCCATCCTGATAACATTTCTCTTACAAACATCTCTGTGTGGACCATCTTAAAAATT
GmaAffx.60948.1.S1_at	BE058917		0	No Homology to Known Proteins			ATCATCATCACAAACATCGGCACCACCTGGATGATGAGAGAAATCACATGCAACAACACTCCCCTAAATTCAATGGAAAGCATGATGAGAAGTTAGACAAAACTGAAACCGATAAAAAGGATGGTGGTCATCATGAAAGTANAGCTATGGTCGAGAATAATGATGGTCAAATTGTTTGATTTTTGAGAATGAATCTGTTGTGGTNGTTCTGTACTGATTGGCAGCTGANNANNTGATATCCAAATTAAAGTTAAAGGAACAATTTCATTATTTATGTCGGATGTAANATTGTCGGCAGTTATTGTCTATGGAAACTTTGTTGGGTAATTGTTGGCTGTGAACATTAATTTGATCCTCATTCAACTA
GmaAffx.61061.1.S1_s_at	CA782177		0	No Homology to Known Proteins			ATTTTAGTCCCTAGTCAAAATGCTGATTTTTGTCGTGTGTCTTTTTCTTATGTCTTTGGTTTCTATCCTATTTCTGTTATAGCTGTTTTGGTTGGGATCTTCAACACTGAAACTTAATGCTTGATTTTGTTACACA
GmaAffx.64231.1.S1_s_at	BI786484		0	No Homology to Known Proteins			GAGTTTCGTTTCAGTTTTTGATCACCATGAGAGCTAAGTGGAAGAAGAAGCGTATGAGGAGGTTGAAGAGGAAGCGCCGAAAGATGAGGCAGAGATCGAAGTAGTGTGCTTGTTTCCCCAGCAACTATTGCTACTAGTTTTGTTTTATTTNAGCTATGTTTTTGTTTCCAAATGTTACGATACATTTTTATTGGTTTCTCTTGCTTTTGTCTTACCTCAAAAAAGATGCTCTTACCGCAAATTAATT
GmaAffx.1790.1.A1_at	CD412488		0	No Homology to Known Proteins			TTTCTTTGCTTTGTTCTCTTATAATTTAATTTATTGATGTAATTTGAATTTTGTTGCCACGAAGGATGGTTCCAA
GmaAffx.1790.1.A1_s_at	CD412488		0	No Homology to Known Proteins			TATGTATGGGTGTTTTGTTTTGTGCTTGTGTAATTTTGTGGTGTTGATGTTTGTTTAACTAGCATTTGATGGGACAATCAGCTAATTTAGGAGGGCTATATACCCTACAAACAG
GmaAffx.20724.1.S1_at	AI973750		0	No Homology to Known Proteins			TTAAATCTTTTGTGGGTCATTCATGTGGCGGTGAAAGATATTCTGGAGCCAGAATGTTGGAAGCATTTCAAATGTGATTGGTGAGATCTTTAAAGCTTACCGTGTTTGCTTCTGGATCATAACTCAAAACCT
GmaAffx.21299.1.S1_at	BF424037		0	No Homology to Known Proteins			TGGCAGTTATCAGAGGTTTACCGCTCAGTCATGTGCTCGATGTTGGTCTGGTGTTGGCTTGTAAAGGAACTGGTGTCTGGAGGGAAAGGGTGGGAACCTTTTCAAAATTTTTNNNTTTTANNAAATCCTCTAGTTTATTGGAGTACTTTTTTGGTGGGAGAAAAAAGGAAAAGCTTGTAAAAACACTTGTAGATAGTTTTCTTATGATGAAAATGATTTCAATCGATCAACTTTGGTGCCTATTGTAATGTGACNTGGCTAGTTCATAAATTATTGCCTCTTGTTACGTGG
GmaAffx.21302.1.S1_at	BU547335		0	No Homology to Known Proteins			CTGATAACTTGGGAGACAGGCAGGAGGATGAAGGTGTCGCTGCATCTCTTTCCCTCTCTCTGTCCTTTCCATCTCCAANNAAGGAACANACAAANGCTGCAGAGCTTTTGCCTGATGGGCAGCGTGTGAACAACNCGTTTTTCCTTTTTGGGAGAAAATAAATCTGCTGGCTGCTTANNTGNTTGNNNNCAANCATNTAAATTATCTTATCTTGTTCCNGATGGCCCAGCCTGTATGATANATAGATATAATCTTCCAGCCNCNCTCCCTACANAAAGGAGCCATTGTCCTCAACAAGAGTCAATAAGTTTTTTTTTTNAATCCTTTGTTANATACATGTTTTTNTGNTAGTTTTTTTTNTNTTCAGAATGCATAGTTAACGGCTGTTTGTATATATAG…
GmaAffx.13587.1.S1_at	BG654181		0	No Homology to Known Proteins			TTTCTAGCCCCTTCTACGAGTTTATTTTTTGTTGTTCCTTTTACCAATCTCTTTGCTATCTATCATCTTGTGTATATAAATTTTGCTGACCAGTAAAATAGTATGATAGGAACTCTGAAAGTACCATTAGGGATCTTTTATGTGCATGTTATGCCTCCTTGTTTGGACTTCTCGTTTGTGTTAGTCCCACTTAGTCTGCATGT
GmaAffx.16384.1.S1_s_at	AW307590		0	No Homology to Known Proteins			CAATCACGAAAGGATCAAGTTGAATGAAAATTCAACCTTGTTGCCGATCAAACTCCCTAGGTAATTTATTCAATCTGTGTGACTAGGTAGGTGCAATTACGGCTTGATGAGTGTCCTTCTGCTGTAAAGTGCCAAGTAACGATATTAATCTCCAA
GmaAffx.16409.1.S1_at	AW317152		0	No Homology to Known Proteins			TTGGGTCTGATTTCCCGTAGTCTTTTGTGGTTGTTAGTCCTGTGTAGGTTAGCCAACCATGTTAGTTAGGACTATTTATACTGTTGTTAATCTAGCAGTGTTGTTTTTACATTGTAAATTATGTTTTAGTGAAACTCTCTTCTTTCAGATGTTATGACCATGTACTTGTTTATATTGCAGCA
GmaAffx.16435.1.A1_at	AW349827		0	No Homology to Known Proteins			CTTTTGTTGAAATTGAATGCATGGGGATTTCGTCCATGCATTCGAGTTTTGGTTCAGTCTAGATTCTGAAGGAAAGGTACCGCTGTGCTCGGTCATTGCATTTTATACTTTCATTGGAAGTTCCAGGTCATCCTTGTTATATACCAAAGCTGTACTATTTTTTTTGTCACAATTTTGTGCATTTAGCCATCTGTAGTGTCAATTTAATGGTTTTTTAAATATTGAGAAGCTTGATAATGCGGTCAAAATCAGTTTGAGTATGCCACTTGTA
GmaAffx.16438.1.A1_at	BE023899		0	No Homology to Known Proteins			GGTACGGCGACATAGGATCACATATCTGGTGGTCAGATGAAAGAAAACTCAAAATAAGCAAAATGGAAAAAGAAAATCAGCTGGTTGATGGAAAGCTGGCTGGGTTGTGGAGGTTTCGTTCAGGTCAGTCAGGGTGTAAACCAAACTGGTCAAGTGCTGAATCACCGGTTTTTCAGGTCTGGTTTTTACAACTATGATCCGCATATCAGTTACTGATGTATTCCATTTTTCTTTCTGTACGAGGAGGGGATTGATACGATGGTCAGCCCATTTAATTATTTTTTACCAGCCNNNGGNNNAATTTATNNNNAATGTTTTCATTTCCCTTGCGTTGTTTGTTTTGCATGTTTTTGGCTGTCGTTCCCATTTGAATAATA
GmaAffx.24507.1.S1_at	BU760930		0	No Homology to Known Proteins			TGAGCATTAACCCTTATAAAGTAAGCTAGTACAAGGTAGACTTAAGCAATCTCATTGCCCTGAAAGAAAGCTCAGTAGGTGGATCTTCTTTCCAGGTCGCAGGTGGAGAGCCGGTTGAAAGGCCTTCTGCC
GmaAffx.24792.1.S1_at	CA819334		0	No Homology to Known Proteins			TAAGAAAATTTAGTTTGAGTCCTGAAAATAAAATAATTGTGGAACTCAAACAAGTTGTACCAAAACCTTCGTCTATAATTTTTACTATTTCTGGACTGCACCCTCCCAACCAAAATGACCCATTACTCGCAACAAATAC
GmaAffx.23184.2.A1_at	BG651576		0	No Homology to Known Proteins			GATTATTAAAGCTCGTACACATGTTTTATTCCNNNNTGTGTTTACAGTTAAAAAGGTATGAACAATGGTCATTGGTTGTCTTTTTCTTGGTTCCTTTTTATATTTTTAAGTTAGTCTCTTGGCTCCTCTAATAGCAGTAGCTGAATGGTTTCTAAGAAAAAATTTCTAGTCTAATCTTGTGTAATTGAGATACATGGGTTTACTCTTAATGTGCTTGACGTATCGATGATTACATGAGGTAGTTTTGTCAATGACATAACGGCTGATGAGGGCAAACCTTCAAAGCTCTTTGGNNANANGATGAGGACTGAGCAGCCATTGTTGTT
GmaAffx.23289.1.S1_at	CD392087		0	No Homology to Known Proteins			AAGTAGCAACTCTGTAGCCTCTTTTCCCATCATCTCCTTACCTCCTCTTTTTTCAAATTAGTCCTGCAGAAGAAGATCATCATGAGGCGCTTAAAGTCAAGAACAACACCACTTTTGTCCAAGTTTGCGCCGTTGTTGGAGCCATGGCCAAATGATGCTATAAGAAAGGAACTATAAACCTGATCAGGACATTTGACCTGAGGAAACATGCCCTCTAGGCAAGTCTGATGCTTGGCTTTTCATCTCTGCTGTTGAGAATCAAATAAGGCATGGCTCACGTCATGAAATTATTTAGCATATCATATCTGTTTGATATTAGTATAAGTTTTTCTGTTTACTACCTCTCCTCCTTCCTTTCCCAGTTGGGACAATGATATGTTATGTATATCCTTCTCTGCT…
GmaAffx.24874.1.S1_at	CA935208		0	No Homology to Known Proteins			TTGATCCTACTTCTTTTTTTCTATTTTTGTTGTGCCATGTATTGTTTCTTTAGTTGGATATTATGCTATCAAGTTTTTTGCTTTACACAGGGTCAGATTAAGAATTTAGAAAGACCTAGAGTTCTATTTGTATAAATCATTTGCTATTATTCATATGTAACCTGAACCCTTTTATGTAAGCAATAATTATGACGTCTAAA
GmaAffx.25581.1.S1_s_at	BI699942		0	No Homology to Known Proteins			GTGGATATTACCCTTGAGGCTTAATGAGCCTACAATAAATTCCAATGTTCAAAAAGAATATCTAGCTCATCGTAACCATACTAGTACCAACAATAAGATATGGGTACGAGGATGCTTATAAACTAATGAAATTGAAGTGTAACATGTCCTTGCATGTTGTCAA
GmaAffx.42925.1.S1_s_at	CA802660		0	No Homology to Known Proteins			TTGATTTGGCTTGTAGTGCCTCTTTGTGTTAGCCTTTGTATGGGATGTAAAACAGTGTCCTCTTGAAGGAA
GmaAffx.42933.1.S1_at	CA803075		0	No Homology to Known Proteins			TCATCTTCTTTTCCCGAGACCATAGTAGAACGTACAATCTTTATTTTCCCCTGAAAATTGAATGGCATGTGATTCTTTCTATTTAACTCCTGTTTGAATGCATCCTTGTAGCAAACCTTTCCTTGATGTTACATCCAAAATTGTGAGCAAAACCTTCTTTTAGCCCTTGAAGAATATACTTATTATTATCAATGGAAGTTGTTCGTCATTTGCATGGAGAAA
GmaAffx.41532.1.S1_at	BI973656		0	No Homology to Known Proteins			TGATTTTCATACTTCAGCTCTCACAGTCATTCTTCTGCTATCCCATTTTCCCTTGCAGTTCTTTATGGATCCTTTTGTCGTGCTATTAGTTTCTATGGCTTTTTTGGTTTGCATTTTGTTTTCATCATTGAGGTTTTGTATCAATTATATCCTTTATTGACTATTATATGACCTTGGAAATTCATATGTTCATGGGTTTAATACATCATTTG
GmaAffx.42109.1.S1_at	BQ080704		0	No Homology to Known Proteins			TGTTAGTCTTTAAATGTCTTGTAAACATAGCTCTAGATTTGGCTACCATCGTTAATAGCTTGATATCCTGTAAAACTAGCCCGAAGTATTTAATGTTCTATAG
GmaAffx.4211.1.S1_at	BG362818		0	No Homology to Known Proteins			TCGAGTTCAATTTGCAATTCAATTGATANGTTTCTGTTATCTGCTATTGAGGATGACTAACGGNTTTNTAATACAGGAAGTTTAGACGTGGTTCAGCGAACACATTAAAAAAATCGTGTTTTTATTTTATATTTATACTGTATCTACAGTTTTTATGTATTTCAGAAATTCAGTATACGTAGNTTTTTATTANGTTATTTTAGTTATTCTTTATGTATACATANTTTTATGTATTTATATCTACTGATGTTTATATTGTTCCGAGACGCATGGATAATTGGAAAATCATGNCNGTTGTCGNTTTNGATGTTAATTGAGCCAAACCAAAATATATTATCAGCCCAGTAAAGTAGTTTTAATCTTTTTTGGTCCCCTCTTAATTGTTACTTTTTCTAGTAA…
GmaAffx.38078.1.S1_at	CD405216		0	No Homology to Known Proteins			GACGAGGAGGAGACTTCACAGCCACCTACTAAGAAGAGAAAGTGAGAATATTCGTAGGAGATTGTTTCCAGGCATTTGAGTCGAGCTTAGTTATTANGGACAGATAAAATAGCAACCTCTTTCAGTAGACCTATCTTGCTTTATTTATATGTCAACGATGAT
GmaAffx.38315.1.S1_at	CA802980		0	No Homology to Known Proteins			TTATTGGGCCATTTTGTCTCATTAGATATGAATTTTTGCTTTGCTGTCTTGGTGAAATATAGACACTCCTTGGGCTTCATATTGCTTGAATAAA
GmaAffx.37221.1.S1_at	BM523361		0	No Homology to Known Proteins			TAATATTGTACTAATAGGATCCTAGTAGCTAGCTAGCCATGTTCTCCGCTGGCATAATATTATTGTCTGTTTGCCATGTGGCTTTAATTCTGGCTCTGTCTCGCGTGTTAAATCGTGTAGCTACTCTGTATTCTTGT
GmaAffx.37663.1.S1_at	AW734686		0	No Homology to Known Proteins			TGATATATGCACAGGTTAGCCTCCANNNNNAATGTGTCACTTCTCTCTCTTATTGTTATCGCCTTGCACTTGCAACATTTTCTTTTTGGTATCACAACTGGATTTGGTTTGTAAAATTCCTTTGAATTCTTCATATTTCTAACAGTATACATTCGTGATTC
GmaAffx.27505.1.A1_s_at	BI273666		0	No Homology to Known Proteins			AGTGGCAGGATGCTATATTCCACGGGGGCTACTAGATATCTGCCCTATTTTTTTTATACATTTAGTTTTTTTTTGGGTGCATTGAATCTGTCTTGTTAGTCTGTGTTGTAATGGCAACTTTTTT
GmaAffx.27632.1.A1_at	BI969421		0	No Homology to Known Proteins			GGAAAAACACACCTAAATGAGGCAAAGTTAAAGGAGTCTGATCTAAGGAATCAAGATGATTAAGAAAAGCAAAGGCCCAGTAAGAGAAATGAGAAAAGAAAAGAAAGTTTGAAAGTACTCCCTCATGCTGTCATATTTTGATCCGTGTATAATAATAAATGCCATATTGTATTTGTCATATTTTGTATAATAAATGTCATATTCATCTAGAGTAGAGTCTCTACTCTCTACTTAATCCAAGCCCAACTGCAAGTAAGATTTCCTT
GmaAffx.28989.1.S1_at	BU548047		0	No Homology to Known Proteins			GTTTTATTTTACACAGATTCAAGAAAGGAAAAAAACAAACAACAGGTTTGGTTTGGTTTTCGAGGCAAATATGGAAATGTCATCGTCCTCTCTGGGCAATATGCCGGTTCGGTATTGTTTTTTTAGTTGCTAGATCTTCTTCACGTTGCCAATGCGGTGGGTAGTTAATTAGTAGATATGGGNTTTGAGATTTGAGAACAATTATGTGTTACTAGAGCTAGAGTCTCCAATCCTTTTATTATTATTATTATTATTATTTTCTTTTATCTCATTCCCGTTTTCGGTGGTTTTGTTTTATGTTATGTTATTGTAGGAACTCGATTTATGGAGTTTACATGCTTCT
GmaAffx.29360.1.S1_at	CA935299		0	No Homology to Known Proteins			TTTTTCTTGTACTCTTACTCCCATGATTAATATATTCTTCTTATGATGTTGCATATATGATGCTAGTATATGCACCTTCCATTGTCATGTGG
GmaAffx.29360.1.S1_s_at	CA935299		0	No Homology to Known Proteins			ATTGATTAATCTCGCTAGCTCCTACCACTTTGTTATGCACTTTATTTAATTTCACTGTGATGGACTCTTTCGTTATTATATATATCATGTTAATTAATTACTAGTTGTCTCCTTTGTTCTGTACTCAATTCTTATTTTCTGTAACCACATATGTGGAACTTTTTCTTGT
GmaAffx.29585.1.A1_at	CD397532		0	No Homology to Known Proteins			TCGGTGCTTTTCTGACTCCCATCATCTTCTCATGCTTTCTGATTCAATAATTTGAATGCGTGTATCGCTATTCACTCTGTTTTTTTAGGATTTCTTTTTCAATGTTGGATAGTTTGCTGGAACGATCTTTTTAATTTGATATTTGTTTTTCTAATACTTCACTCAGATCGACGTTCATAAACTGTTTTAGTCCTTTTGACGCACATTCACAAGTTAGGGTTTTTGTTAGTACCATCTGCCCCACCAGTCATTTCGTGCTTTACCAGTTATCTTATCTGGGAATATCTGCT
GmaAffx.30028.1.A1_at	BU544443		0	No Homology to Known Proteins			GAAAGTTGATGGTAGTGGCAAGAAAAAGAAAGGTGGGAGTGGATTTCAGGTGGGGAAGAGAAAAGTGAANNNNAAGTTGACTGCCCTTGNNAAANCTAAGGCTGCNCAGGCAATGGAGCTTGACAAATGAGGTTCGACTTGTGTAATTTTAGNCAATGTGTTGAAAATTGGTAGATGACAGTGTTGTTTTGAGGCTCAATATCCTTGTTCTGTTNNGCTATATGACTATGAGGTTGTAAGTTGTATATTAGGTGACTATT
GmaAffx.32629.1.S1_at	CA784365		0	No Homology to Known Proteins			AAAGGAGGAGAATTTAGTAGGCACGGAGGCTTATGGCATGCAAGAAATTGAAGAAAACAGAATTTAAGAGCAAGAGTNNNNNNNNNNNNNNNNGNNNNNNGNNNTNTTTNTNNTTTTNNNTTNTNNTTCAGGNTGAATTATTCATTTTTTTTTTNGGNGAGTTATTTATTCATTATTTTCACACCCAACGAAAATGCTATTTTTTAATTTTGTCCCCAATTGATATAAATATCCCAAGGAAGTGGAAAAGAGTGTTATTTATCTTTGACANANNNNNNNNCTTTCTAGATGCCGTCAGATTTCATTGTTTCATTGTAATTTTTTATTTTTTTTTATAGATTATCCCTCTTCTCAG
GmaAffx.33081.1.S1_s_at	BQ453706		0	No Homology to Known Proteins			CTAGGCTACTTTTTTATATTTGTGCTGGTAGAAAAGAATTTCTTCTTTTGTTGGCATGATATACTCTACCAACTACTTGAGCT
GmaAffx.33119.1.S1_at	BQ611020		0	No Homology to Known Proteins			AGAGTTAGCTTCAAGAGTGTGTTGTGTTGTGTTGTGCCTATCCCTGCCTTATTCTAGTTCTTTTTTTCATATATATATTTGAGGAGTAAGTACTTTTGATTGAGTCAAGCTATTTATCTGATTCGGTTGCTTATTGATGAGAGGCAAATATCAAACTGTATTTTCATCTGTATAAGTATGATTCACTG
GmaAffx.3329.1.A1_s_at	BM139593		0	No Homology to Known Proteins			TGCTCCACTCCCTCGGTATCAACGACATCNCCGGCATCACCCAGGTTGATCCTGTCCCTGTTCAGCAGAACTTCCCCTTCACCAGGAGGTACTGATGATGATGGAGGCTCTTCTGCTTTGAGAAATAAGACTTTGTTTTATGCTTCTCGTTTCGTGTTTTCGTGGTTTTTATTTTATTTTATTTTATTTCTCAAGCCTTTTAATTTTTGTTGTTGTTGCTACTGCTGCTGCTTTAGATTAGACCGAGTGGAATTATTATTAGGGTTTTTGGATTATAAGAAATGATATACCGTTGGAGTC
GmaAffx.34785.26.A1_x_at	BE661741		0	No Homology to Known Proteins			TCCTCCTTCCGTAAATTGCTCGTCTTTCCNAAACGTGAATAGTTTAAAGAAGGGAGTTCTCTTTATTTGTATTTCTAAATCCAACTGTTTAGTTAAGGGATGGTTATCTCTTGTAGAGCTTTTAGTTTGAT
GmaAffx.35464.1.A1_at	BE657554		0	No Homology to Known Proteins			GGCGTTTTCCAATGGTCTAATATTTAGTGCATCTCTTCTGCCCTAAGCTATCTTTGGTGGAAGATTTGGTTCTATTGTGGTGGTAAAAGGAAACCCATATAATGAAGAGAATGATCCTTGCATGTTAAGTGGAGACAGGGTTAGACCTTGCAAGTTACTCAAGTTTAAAGAATATCTCTCCATGCCTTCACCGTTCCTCTTGATGTGGTTCTCTTATCTCTTGGTGCTATAGCTTGTTATGTTTAGAACAATTGGTGGTTTGCTCTTATTAATTTTTGTAATTGTAGAGACCTCCAGAACAAAAAT
Gma.9774.1.S1_at	CA935566		0	No Homology to Known Proteins			TGCTGCTCTATTATCAGGAATTATATTCCTTCAACATTTTAGCCCTTGTTGTGTCTTTGCTGCTACATGACCATTGTGCTGGGAGACCAAACTATCAGAGCAAGTTCCATGCACCAAACCACAGATTTTGGCTTTGGAAGTCTGAATATATTGGTGTATGTGAAATTATTAATATCATTATTTATAAAATATATAGTTAAATTTTGTATGTCGTTTGAAACATTCTTGCAACT
GmaAffx.11166.1.S1_at	CD403849		0	No Homology to Known Proteins			GGAAAATGGCATTATCTTCAAAGAAACTTGAGAAGAATGGNCTTGGTTCTAAATTAAAGAAGACAAGGGTACTTGTTGAGGTTGAGCGTGAGGACGCTGGTGAAAGACAGAGGATGGTACAATAGTTGCATTCGCCATTGTTATGGACAGGAGAGGAAAAATGCTATAGCAGAATCGGAATTTTGATTATTGAGTCTTCTATTTTTTTTTNCAGCTTTTGAAATTATATAGATTTTCCTCTTTTCTTTTTAATTTATTTCATATTTGTTCTGAAGAGTTCTGGCAAATGCCATAAATTGTAGTCTNGGGTTGTTTGATATAGGTGGAGCATCTCATTCCTGCATTAATTGACCATTAGGGTGTTTTTATAATTTTCTTGGGTCACGCAGCTCAGCCAGG…
GmaAffx.11220.1.A1_at	CD415475		0	No Homology to Known Proteins			TATCATGTGGCTTTGACATGGGTGAATGCCTTGCACGTGTTCTCGGTTTTTTTGGCACGTGCGGAAGGATATATATTGATGGAGTTTTTTTTTTTCTTTTCAGTATTATTAATTATTGGGCTTTATTTCCTATTTTGTTCTTTTGGTTAAATATATATAAGTTTGGTAAGACACCGGGATTCATGGGCGTTGGCTTGTGTTGAAAAAGGAACTAAGTAAATTATTTTTTTGTTAACTTTTATGATTGATTTTTTTTTTGTTTACCNAAGAATAGCCTGTGGCTTTGGATCGATATTTGTATG
GmaAffx.11956.1.A1_at	BE657986		0	No Homology to Known Proteins			TTGCTTTAACTGGTACTACTTCTGCTCCCTAGTTATCCTACTTGTTTGCTTTGTTCCTTGTTTTTAGTAGCTTCGGTTAGCTGTGTCTCACCATGCTTTGTTACTCTCCNTTTTCATNTNNTTNTNNTTNTTNTNNTTNTTATTATGAACCTAGAACAATTGGATGCATTTGTGNTTTTTTANATGTGGNTGGCTAATGCTGTTAATATTTTATATCTTTTGCCATGTGATTGTTATTATGATCATTNTGAATTCAATGCAATCTGCTTGGGTTTAAATTGTGGAA
GmaAffx.10278.1.S1_at	BG237749		0	No Homology to Known Proteins			GACAAAATCGGTTTTATGAATCGGATTGATTGTTTAATTTTCCTTTTTTTGAATTTTTGTTGTTAGACTTTTCAGATTTGAGGTAGAAGAAGTTTAGCTTTTTTTATTTTTAATTTCCGTAGAATTTCTGTTCGAGTGGGTGGGACGGGTAAGGAGGAAGACATCCTGTTGGTTTCTGTGATATGAAACCAATTTGGGTTGAATAAGCATGTTTTGTTTGGGGAATGTGTGTGCATTTTGCTTTTGCTTTATTAAATACTAAATTATGTGTTTCTGTCCACCTTTTCAATATATCAAA
GmaAffx.14030.1.S1_at	BE021503		0	No Homology to Known Proteins			TGGCTCTGGCTCTTCGTCATATTCAAGTTCTGGCTCCTCTTCTTCTTCATCAGGGNCAGGCTCTGGAGCAGGTTCTGAAGCTGGTTCCTATGCAGGATCTCATGCTGGCTCAGGCTCCTCTAGAGCGGGTTCTGAAGCAGGTTCATACGCAGGGTCTCATGCAGGATCAGGATCATACGGTGGTAATGGAAAGTAATTAATTAAATGCATGCCAGTTAAACCATATCAATTATATGCATGCTGTCCTGTGGAGAAAAGAACAAGTCGGTGTCTTTGTTAGTTCACTAGAATTATACTTTAGTAAGTAAGCAAAAATAAGTTGATGCATGTGTTGTGTCCATCCTGTTCTTTTTCTTTTGTACAAGTAGGAATCGTGCTTCTCCCTGTGTCCAATATGCA…
GmaAffx.14577.1.S1_s_at	BM528204		0	No Homology to Known Proteins			AATGTTGTACAATATATATGTGCATATGTATGTAGTAGTCATTCCACAATATGGTAGCATAGCTGTCTAGTATGATAGACACGTCTGTGTCGTGTTGCCGCAGTTAGATTCACAGTTTGACCGTATCCATTTTTGTTTTGAGGTTAAGTTTAGTTTTCTCTCTTGGTTAGTGATAATAACACGCAGTTACC
GmaAffx.14750.1.S1_s_at	BQ081552		0	No Homology to Known Proteins			GAAACTTGAAAGTCTTCTCGTGGTCTTTCTTGTAGCCTC
GmaAffx.1301.74.S1_s_at	AW704103		0	No Homology to Known Proteins			TGAGTCAGGATCCACCAACACCACTTCACNANCAAAGCCTAGTGGAGCTGTAACTGTTTCCAGTGGCATTGGCCTTTTGGTGGGGTCTTTCTTTGTGTCAGCAATTATGTTTGGTTTCATGGGCTAGGGAAGAGGCAGTGCTGTTTTTTTTTTATTCTCCTTTTTATTAATATGTTATTNTTTTGCTNAGAGTTTNTNTGAATTTCATCATTTAATCCAGATGTATATCTAATCTTGA
GmaAffx.1301.78.S1_s_at	AW394497		0	No Homology to Known Proteins			CTTCTCAAGTGATCTGAATTTAGTGTTCCTTTGACATGTCTAGTGTTTTTCTTGTTTATTTCCCTAGATTTCATCGTATATCACTTGTGTTGGATGTAATCAAGAGATCANTTTTATCAAATAAATAATGCCAAATGGCATGTCGAAGTAAAA
Gma.8366.2.S1_at	CA935791		0	No Homology to Known Proteins			TAAATCTTCGGTTTATTGTGTATGAATTGAGAACTGTAAATTTTAAATAGCATATTCACTGTTGCTCACATTGTTCTGTGGTGTCCTCTTTATTATTCTGGCAATGAGAACACATCCCTTTTTGTTCANNNNACTGTAATATTATTTACTTGCACAATTGAGATGCTGCTGTGAAGTCTTTTTCTGAACAAAA
Gma.8149.1.S1_at	BQ629660		0	No Homology to Known Proteins			AACAGTTGCTGCCATATTCACCAATGGCTTTCTCCAAGGCAATGTTTCTCGCCGCCGTAATGTCGGTGCTCGTCGCCGTCATCTCCGCCGCCGAAGCTCCAGCTCCGAGCCCTACGTCTCCCGCCGCCGCCGTTTCGCCGTCCTTCGTCGCCGGTGTTCTCGCCGCCGGAGCCGCTCTTGCGTTCGGATCTGCTCTGCGGATCTGAACGTAGCTCATGGATTTTCTCGTTTACATGCGTGGATTTTTAGTAGAAGCGGAGATTTGAGCAGCATTAGTATATAACTCTCTCTCTCTCTCTCCCTCCCTCTCTCTCTATATATATTGATATTGCTATGTAGAGATTATTACTACATATGTTGATTTCTGGATCTATATTGCGTTTATGGTTTGAGTAGTAT…
Gma.8564.1.S1_at	BU926782		0	No Homology to Known Proteins			AGACATTGAAAAGTCCCCTCCTTCTGCAGCAGAGGGCTGTTCTTAGAAGATTTTCAGTGCCTGCTCAGAAATACATCAGGAATCAAAAGAATATGAAGTTAAGGATTGAAGAAACATTTTTCAAGAGTCAGGTTGTAAATGGAAAGGCACCTTAAAGAGCTTGGATGAGAAGAGAAAGTGGATGGAAAAGGCCAAGAATATGAAATCAAGTAATAATGAAATCTGACCTTGTATATATTATATTATATGTAGGGATTTTTGTACATATATGTTGTAATTTTCCTTTTTAGTCCTGCTGCTTATCCTATTACTTGATCTTGGCATATGGTTACAGGGTCCAACAGCATCTGTCTAATTATTGGTTATTTTTGCTACCGACGATTTGTTGAAACGGTAACC…
Gma.8614.1.S1_at	BG156767		0	No Homology to Known Proteins			TTCTTTCTTTGCAAGTTTACATCTTTTTGTGTGTGAGAAAAATGGCATGCATTAGCAAGAGCAGAGCAATNNGTTCTTCTTCATGGCTTTCTTTGTGGGGNCTTCTATTTNGCTGCAGGGGTGANNGTGCTCAGACCAGTGAGTTCCCTCAAGCGCCAGCACCAGCACCAACAATGGACGCTGGAGCTGGATTTTTGGTGACTTACTCTGGAGCATTTGTTTGCTCCTCACTGCTCCTCTCTCTTATTGCCCTTCTATGCCATTAATTCTTCATGCTGCAAGGAGTGAAACCTATCTACTCTATTCAATTTATTTTTTTCTTCCCCAGATTCTGTTCTCTTATATCTTCATT
Gma.9219.1.A1_at	CD406260		0	No Homology to Known Proteins			GAAGAGCTAAAATGACAAACTCGTGTTCCTTCACACCCTGCCTGTACATTAACATGGTGGAGTACGATATTTCATGTGTTAAGGCTGTGGCAAGCTCTCTGTACATTTACNNAATTCAGGGTGTCCCTCCATACTATTTAATTGTTCTGTTCTAGANNNTTTTTTTTTTGTCCTGTTTTCAATTTTGTATTTTGTTTAACCCCCATATTGAGGGCCCCATTGTTAGCTGCGTAGGTTTATGGTTGTACGCATTTGTTATTCTTTCACATTGGTGCCCCATTGNTTTAGCGATGATACCANTGAANGTAATTAGTTCACCATTCATATTTCATACCAGATCACACAATAGCTGCTACCTATATATACTCCCTAGTAAACATATATCACATTTAATCAAAA…
Gma.9252.1.S1_at	BI786435		0	No Homology to Known Proteins			ACTTTCGTGATGTTGTTGAACTTTCTTCCGTGATTTACTGTTATATATCTATCCTTCATTTAGTTTTTCGTCGATGGATGTTTCTTTTATTGTAATTCAGTGTGTCTAGCCACCGGAATTAATAGAGGTTATATACTATTAAAATTTGCGATCAAGGTTTTTTAGTGTTGT
Gma.954.2.S1_at	BU965254		0	No Homology to Known Proteins			TTCTTTGGCTTGTTGGGTCATGTTTTTGAGTCAAAATCTTCCTGGAAAATGTCACCTCTGGTTTGGTAAAATTTTCCATTAATGAAATTGAGATCGATAAAAGAATGAAGATATATANNATATATATATATATGGCCNAAGTATACNNNTTCATTCTAGTGTAATGAGGTCAGATGTTCAGAGGGCTATAGACAGCTGACATTATACCGAAATCCGCGTGGATCTCTTAACCTGATATTCGTCACGTCACACANTGGATACTCTTGTTTATAATGTTACATTTCAAATTAATTTCCCTCTTCCTCCCATACTAACCTGTAGGGA
GmaAffx.89473.2.S1_s_at	CK605927		0	No Homology to Known Proteins			TCCACCCTACCACTACTAGAATATAGCCCTTTCATATCACACCCCCACATGGATGTATACAGAAAGTGTGNAAATGAAAGCCNTGNAGGGGGNAGGTGCAGTTGCNGTTTGCAAATCCACAAAGAAGTATANATGTTNGANTANTGTTATTGTTTAGAGGACTCTGTCTA
GmaAffx.89191.1.A1_at	CK606438		0	No Homology to Known Proteins			AGGGTTCTGTTTTCTTTTCGCGATGAGGGCCAAGT
GmaAffx.89191.1.A1_s_at	CK606438		0	No Homology to Known Proteins			TGTTGGATTTTATTTCGTCTTATGTTCTTAGC
GmaAffx.89191.1.A1_x_at	CK606438		0	No Homology to Known Proteins			AGGGTTCTGTTTTCTTTTCGCGATGAGGGCCAAGTGGAAGAAGAAGCGTATGAGGAGGCTGAAGAGGAAGCGCCGAAAGATGAGACAGAGATCCAAGTAGTGCGTTAAACCTAGTTTGTTTCCGTTGCTTTTACAATTGCTTATGTTGTCAAATAGGACACCCAGTTGTTNGTGGCACTGGTCTCTCCTTTTTGATGTTTTGATACATTTTGTTGGATTTTATTTCGTCTTATGTTCTTAGC
GmaAffx.89191.1.S1_x_at	CK606438		0	No Homology to Known Proteins			AGCATTGTTTTCAGCTAAGAACATAAGACGAAATAAAATCCAACAAAATGTATCAAAACATCAAAAAGGAGAGACCAGTGCCACNAACAACTGGGTGTCCTATTTGACAACATAAGCAATTGTAAAAGCAACGGAAACAAACTAGGTTTAACGCACTACTTGGATCTCTGTCTCATCTTTCGGCGCTTCCTCTTCAGCCTCCTCATACGCTTCTTCTTCCACTTGGCCCTCATCGCGAAAAGAAAACAG
GmaAffx.8889.1.S1_s_at	BG509533		0	No Homology to Known Proteins			ATGAAATAAGTAGTCCTGCTGCTTTTGTATGAATAAGTTGTCTCGCATTTTATCATTGTGCGTTTTGTATCAGTACCAGTNATCAACTTGTTTTCTTGCTTTTATGGGTTCTTTTGTTGACTTAAAACCGCAATTGAAACCTCATT
GmaAffx.90138.1.S1_x_at	CF805863		0	No Homology to Known Proteins			TCCAATCCAGCAAAGGTTGTTGTTTGGTGTGTAATGTTTTAGGTTACTATGTACCT
GmaAffx.8999.2.A1_s_at	BI700574		0	No Homology to Known Proteins			ATAATTAGATTGCAATTGTTTGTTCGTTTTATT
GmaAffx.90082.1.S1_s_at	CF805807		0	No Homology to Known Proteins			AACAGGAGGATTGCAGAAGTTGCTTGAGTGGAACTCGAGCTTGGTTGGATAATATATTCTTTTAAAGTTCAGACATCGTGTTTCCATTTTTCTTAAATTTGAGTATTTTGAATTTTTAGGAGGATGGTTTTGCTCGCATCCTCCTCTTGCTGAAAACTTTGTAGGTAGGAATGATATAATTTTGCATGCTAGGTTCTCTACATGCCATTGTCAAACGGGAATACTCATTTGTTTTCTTGT
GmaAffx.90222.1.S1_at	CF805947		0	No Homology to Known Proteins			GTTTCTAGGAAAATAGCAATCTGTTATTGAGCCAACCAGTTAGATTTGCTCTTAGTTGGTTGTTGCTGCAT
GmaAffx.91550.1.S1_at	CF807275		0	No Homology to Known Proteins			TTTGTTCTCTGCACTGAATAATACTGTACTGAATTTCTGAAACACGTGGTTAACCGGATATTGCCCAAAGATT
GmaAffx.91410.1.S1_s_at	CF807135		0	No Homology to Known Proteins			GTTAATATGTGTACTGGTTCATACTATATATTTTCAAAGTGGGGTGCCGAAGCAGCGTGCGGCCAATCTGCTGTGTCAATGTGTTCTTTCTTTTTTATCGTTTCCAATTTGTTTTTGAAGTACTTCTCCAATTTCTGGTCACCAAATGGGGGGCCAAGGATTCTTCTATTTGTAGGGTAGTGGCACTTTCAAAGAAGGCCAAGGATTCTATTTGTAGGGTAGTGGCACTTTCAAAGAGTTTCTTTCTCT
GmaAffx.91128.1.S1_s_at	CF806853		0	No Homology to Known Proteins			TGTTATTGTGTCTCTTATATCATACTTTTTTT
GmaAffx.9539.1.S1_at	BI972166		0	No Homology to Known Proteins			TAATATTGCCCTCTCATGTTTTATTGGTATTCTTTTTTATGCTGNNNANNNNNNNNAANTTCCACGGTCAATTAGTAGTTCATAATAATCAATGTTTT
GmaAffx.93439.1.S1_s_at	CF807894		0	No Homology to Known Proteins			AGTTGTAAAGCACTCTGCGCTCTCTCTGCATGATCATG
GmaAffx.99.2.A1_s_at	BE330213		0	No Homology to Known Proteins			GTTCTGTCCTAAGTTACTTGAAACTTTGACCTGGTATTTTGATTTTAATGGTGAGACGTGTGCTACTGCTACATCATAATTCCCATCAAATTTAATTATCGATGGGTTAGAATTTCATTAA
GmaAffx.93125.1.S1_at	CF808797		0	No Homology to Known Proteins			GCAATAACTTGCAGTGTTTACCTTGGAAATCACACTAGTTAATTATTTTCTGTATCTTTCCTTGTATTCCATTAGCTGTATATTGAGTTTTGAAATATTATACAAAATTAAGCAGTCGGTGTTCTGTTCTGTGAAATGTGAAC
GmaAffx.93125.1.S1_s_at	CF808797		0	No Homology to Known Proteins			TATCATATGGGTGTGACTAAGCCTCATGTGCTTATGCTGTTGATCATCATGGTTGTCTCAATTGCAGAGAAACCATCAGTAATAGAAGGAAGGGCTCTTTCCTTGATATCTGGTCA
GmaAffx.93125.1.S1_x_at	CF808797		0	No Homology to Known Proteins			ATGGGTGTGACTAAGCCTCATGTGCTTATGCTGTTGATCATCATGGTTGTCTCAATTGCAGAGAAACCATCAGTAATAGAAGGAAGGGCTCTTTCCTTGATATCTGGTCAAGGGTACTCAAAGATTTTTGCAACGCTTGGACTTGTATGCAAGTGTTGTGATGGGGTTGGAGGTGCCTGCACTAGTACATGGACAGAATCTTGCAATAACTTGCAGTGTTTACCTTGGAAATCACACTAGTTAATTATTTTCTGTATCTTTCCTTGTATTCCATTAGCTGTATATTGAGTTTTGAAATATTATACAAAATTAAGCAGTCGGTGTTCTGTTCTGTGAAATGTGAA
GmaAffx.93153.1.S1_s_at	CF805913		0	No Homology to Known Proteins			ACTTTTACTACTCATCTCTCCTGAGCTTGCAAGTGCTGCCCAACCTAGTCTTATTCTTCAACTCGGCCGAAAACTTTTCCAATGCGGCAGCGCCGCCGTCCCTGTTCGTGGAAATACCCCATCCAATGGCCGCTCCTAGAGGATATACCCCACCACCAAAACACCCACTCTATGGCTGAATATTTGAGATGTTAGCATCCTTCTTTAATTTTGTGATAAAAAAAATACTTTTAAAGATGTATAATTGTGTGTCATTACTATAATATATGTCATGTATGCTTAATTTCACTGAACCATGTGTACTACTGCTTATCGGTCACGTCCATTTAGTGGCCACACCTGTATCCAG
GmaAffx.93298.1.A1_at	CF809023		0	No Homology to Known Proteins			TTTCCTTTTCCATTCCTGGAATTTGGAAATTTAGTTAGAGTATATGTTTATGAAATCAAGCCATCCAAGAAAGAGTGGCCAGGATTGTTGTCACATTGTTTTTGTAGAATTCTGATGGCGCTGTCTTGACACAATAAAGAGTGTTTTTCATTTGACTGTTACTAA
GmaAffx.93298.1.A1_x_at	CF809023		0	No Homology to Known Proteins			TTTCCTTTTCCATTCCTGGAATTTGGAAATTTAGTTAGAGTATATGTTTATGAAATCAAGCCATCCAAGAAAGAGTGGCCAGGATTGTTGTCACATTGTTTTTGTAGAATTCTGATGGCGCTGTCTTGACACAATAAAGAGTGTTTTTCATTTGACTGTTACTAA
GmaAffx.92426.1.S1_at	CF808151		0	No Homology to Known Proteins			GAACAGTTGCAGAGTTTTTAACATTAATACATCCAACGTTCTCAACCAGAAAGTAAAAAATGTACATCCTCTTGCCCTTTTCCCCTTATTAAATAACACAACTTAAAACTTGGGGGGCAGTTTGGCCACAGACATTGACCGTAGTTCATCTCACAGTCGGCAACATTAAAATGGAAGGAAGGAATAACCTGATACATTTTCATATCCAAAAAATGGAAAATTTTGTTGTTTGGCATTGCCAAGAGTTCCTAAATT
GmaAffx.92374.1.S1_s_at	CF808099		0	No Homology to Known Proteins			ATTTGTAAGCAAGTTCATCAACTAGTATCATCCTTCTGAAATAGTTCTGTCGTGAAAGATGTAATCTCCTCTGAACTGGCAAGTTAATTGCTTATTTCTGCTTTTGTAGTCATCTGAGATTGTTTATTTTTAAAAAAATTCTTCTTCCCCCCTCCCCCCTTTTTTTATTGGAGGGGCGATGATTACCGAAGGTTGGCACAGTTGAAA
GmaAffx.92561.1.S1_s_at	CF808286		0	No Homology to Known Proteins			CTTGAGCTTTTTGGAGGGCTTGTTTCTTTTGTTGAGGAATTGGATTGATTTGTTTCATTGATGTATTGCTTGGTTTGTTATGAAAATTTATCTTAAGGGGGGTCTATTATTCTCCTAACTCAGTGTAATGTATTCAT
GmaAffx.92943.1.A1_s_at	CF808668		0	No Homology to Known Proteins			GGTTTAAGTGCTGCTGTTTATTATGTTTTAAAATGATGTATTGAACTCGTTTCAGCGAAAGTATGT
GmaAffx.92830.1.S1_s_at	CF807748		0	No Homology to Known Proteins			CTTACCACTATTAGCTAGCATAGCTCTATGGATATGAA
GmaAffx.92743.1.S1_s_at	CF808468		0	No Homology to Known Proteins			TTTTGTTCGCTTCAGTCTGCAACGTCGCTATGTCGGACTCCACCGCCAAAC
GmaAffx.92128.1.S1_s_at	CF807853		0	No Homology to Known Proteins			AGTATTGGGATAGTGTGTTTTTCATTTTGGTGTTGTTATTGGCAGTTTTATTAAGTGTTGTTTGCTTTTTATTACTGATCCTTTTGTCATCAGCCTGGGCTGTGTGTCTTCGGTTGTGTTGGAGACTGAAA
GmaAffx.91665.1.S1_x_at	CF807390		0	No Homology to Known Proteins			TTATGTGGGCTAAAATGGATTCTGCTTGTAGGTCTGTATACCCTTTTGTAATGTAAAGTGA
GmaAffx.91701.1.S1_x_at	CF807426		0	No Homology to Known Proteins			TGAACCGTGTTAATTGGATTTTAGAAAAACCAAAAAGAAAAAATAGATTGGTAGCTATTTGGGCATGCCTTGTAATATGCCTATACTTGTTTTTACATATTCAGCGTCGTGGTATTGTGTTGAGTTAGTAGTGCGTTCGTGGT
GmaAffx.92769.1.S1_at	CF808494	At3g19760	1e-124	Post-Transcription			TAATCGTGAGCTTTACATTCATCGAATTGGCCGTTCTGG
GmaAffx.90323.1.A1_s_at	CF806048	At2g21660	3e-37	Post-Transcription			GGTTTATGATTATGCTCAGTAATTTTAGTTGTGTTTGAGTTTGAGTATCTTTATGGTTTTGTGTCACCGTG
Gma.8349.1.S1_at	CD408617	At4g30220	9e-33	Post-Transcription			TAATCACCGCTTCGAGCTCTGTCATTGTCNCAAGTTCCAGGNNNCNNNGNTNNNGNTNTCNNNNAGCATTCTACAATGGCNACTATNCCAGTTAANCCCAAGCCTTTCTTGAACAATTTGACTGGGAAGCCNGTAATTGTGAAACTNAAGTGGGGAATGGAGTACAAGGGCTATCTCGTTTCCGTTGATTCCTANATGAACTTGCAGCTGGCCAACACNGANGAGTACATTGAGGGACANTTTACTGGAAATTTGGGAGAGATTTTAATCAGATGTAACAATGTTCTCTACCTTCGAGGAGTACCGGAGGATGAGGAAATCGAAGATGNTGCNGAAGACTAGANAGTGATANAAGCTGCTAATGGCTATGACATAAANNGAACTCGAATTTNCTACTGT…
GmaAffx.1301.88.S1_s_at	BG041563	At2g03680	3e-21	Post-Transcription			AGTGAGTGAGTGGTTCTCTTGCAGCAACAAGGTTTAGTGACACCAAACAGACTGGAAATGGGTCGTGGGGTCAGTGCTGGTGGTGGACAGAGTTCCTTGGATTATCTCTTTGGCAGTGGGGTACCTGCCAGCAGTGCAAATGGTGCTCGCACTCAAAATGCAAGTGCTCCTTCACCACCGGTTGATAAGCAAAGTCCAGCACCAGCAGCAGCAGCAGCACCTGCACCTGCAGCAGCAGCAGCACCAGCACCTGCACCNGCACCAGCACCAGCACCAGCTGATAAGCAAATTCC
GmaAffx.14915.1.S1_at	BE057713	At5g37720	2e-22	Post-Transcription			AAGCTGGAGGTGGTCCTACTATGCCTAATCGTGGTGCTGGTCGGGGACGTCGAGGTGGCCCAAGGAGTGGCAGTGGACGTGGTGGAGGTGGTGGTCGAGGCCGTGGTCGCGGCAGCAGGGGTGGTGGTGGAGGTAGAGGTCGTGGAAGAAAGGATGCTGTTGNNNNNNCAGCGGAGGAANNNGACAAGGAGCTGGAGACCTATCATGCTGAAGCCATGAACATCTCTTGATCTTGGAAGCCGCAGTTTATTTTGTAATATCACTTAAGATTGGCTTCCTTGTACAAAGCTGGTTTCCTTGGCGTTTACTTTGAATCTCTTACTGCTTGGTGCTTTTAAACATGCCATCTTATTTGACCGCATTTAAGTAATTGTTAGAGGCTGAATGATCTACTTGGGG…
GmaAffx.30043.1.S1_at	AW099862	At2g21660	2e-29	Post-Transcription			TGGTGATGGTGGTTCTCGCTACTCTCGCGGTGGGGAAGGCGGTGGATCCGATGGAAACTGGAGAAATTAGGCATATGACCCTGTAAATTAGGGTTTATGATTAAGTTCAATTATTTTAAGGTGTTGTCTGTGTGTGGTTTAAGTTTCGGTATCTGTGTTGGTTTCGTTTCGTGTTCCTGTGGTTTTCGTTTTTGACCTACAATTCTAGTTGTGTTTATAGTCGATCGAATGAAATGATAGTAAGAAATTATCGCATCAAANNTNNANNNANNNNNCNNNNTGTTTGCTGGANNTGGAAATCGAATTGGATTAATGGTGATGGTTCTTAGTTTACCGGATTCGGTAAATTGTATACTCAAAACGATAAAAATCACTAATTTATTTTTTTAAAATTGGCAT…
GmaAffx.5378.1.S1_at	BI969133	At5g61030	2e-05	Post-Transcription			ATGATAGACCTTCTGGACCTCAATCTGGCGGCGGCGGCGGTGGTGGTTATCGCAGTGGGGGTTTTGGCGGCGGGTGGTGATTTTGCTTCTCGCAATGGTGGTTGGTGATTCAATTTTTGTGTCTTCTGCTTAGTTTTGAGATTATTTTTTTTATGTTTATGCTTTGCACTTTGGTAAAGTAGTAATTAGTGAATTTTTATGCTTTTCCTCCTTACATTTCTTGGTGATGTTATTCTGTGATGTTAATGGAGCATTTGTTTCCATCTATTATGGTCAANNNGAGTGTTAGGTTGGATTTCAANNNANNNNNNNNNNNNNNANNTCNANNNTNNTTNNNTNNNTNNNNNNACTTGAGAAAATAGCCCCGGCACTACCACCTTTTATTGTGACAGTGAGTGT…
GmaAffx.4391.1.S1_at	BG654256	At3g19760	0	Post-Transcription			AATACTACAGTACTCAGATTGATGAAATGCCAATGAATGTTGCTGATCTTATATAATTTGTCACGTGGTGTGCTGGATGGAGTGGATTTGTCATATCTTGTGGTAGGGAGTAGTGTTTGAATGTGGTTTCTTGCTATGGAATNCATTCGTGATGCTCTTGTACACTTTTGACTTTTGGTCAAANTAGAATTTTTACCTTAGTGTTGACTGTACCAGAGGTAGTGTTTTTCTTTGCTGATG
GmaAffx.5376.1.S1_s_at	BI321591	At2g21660	1e-37	Post-Transcription			GGTTTATGATTATGCTCAGTAATTTTAGTTGTGTTTGAGTTTGAGTATCTTTATGGTTTTGTGTCACCGTG
GmaAffx.71117.1.A1_at	AW349652	At1g60900	8e-15	Post-Transcription			ATTATGTGGTGTTTGGATTCTATCTTGATTAGCAAGGATAATCTTTTGTATTATTATCATAAACTTGTAAGCTAGAGTTGTGGTCATAGTACAGAAACTGTTCTATTTAGATGCGAGTAGTAAGAGAGACATGATGACAATTTGTTAAAATAGTTTTACCGGTCTACATGGATCTGTGTGGTCC
Gma.7856.1.S1_at	BI971143	At1g43190	5e-07	Post-Transcription			TTTTTTCTCTTTGAATCATTTATCTTTTCATCTCCATTGCCTCTACTAGATATTTAGGTTTCTAACATAATATTGTGGGGCAAGCTTTATTATTGCAGATGGATGTAGTCTTAAAGAATAGAAAAAGGAGGAGGGAAGTTACTACCTTCTTCGGGGTTGAGGGATTGCCTTAGGGTTTTTTATAATGATTGTTGTATATTTTCTGTAATTCAGGCTAAGTAGGCCTTTTCTGTTGTATTCTCNATCCATTTCAATTTTCTTGTCCAACTAAGTA
Gma.5264.1.S1_at	BM093119	At5g04600	4e-73	Post-Transcription			AGACTGAGTGGGTAACCTGTCTCATCATCTTTAAAAGATGATTTTTCTGCATATCCTGAAAGGTACTAGAGAACTTAATCAAAGTGAGGTTGTTTTGTTACCTTTCTTCCCTTAGATGTGTTAGAGTAAAACTGCTACTGCTGTTTTAGGACTTAGTATTAGCATTTAACTATTGTCAAGCCTTTGCAATTTTGGGACTTAATTCTGAAACCTTGTGTTCTCAGAAATATTTTATAGAAGCATTATCCGTTTCTTAATATTTTTCCCAGGAGGGTAGATTGTTAAGA
Gma.5747.2.S1_a_at	BI498317	At1g48410	1e-126	Post-Transcription			AATCTTTGCTACACATATGCTCGGTGCACCCGATCTGTTTCAATTGTGCCTCCTGCATACTATGCTCACCTTGCTGCATTCCGTGCAAGGTTTTACATGGAACCCGAGACTTCGGATAGTGGCTCTATGACAAGTGGTGCTGTTGCAGGCCGTGGGATGGGTGGCGGCGGTGGTGGTGGTGTAGGGCGTAGCACCCGGGCACCTGGTGCTAATGCTGCTGTGAGACCATTGCCTGC
Gma.18058.1.S1_at	CD391958	At4g25630	1e-104	Post-Transcription			GAATGGTTGATGTCATATTTTCTGANGTTGCTCANCCTGATCAGGCTAGGATTTTGGGGCTGAATGCTTCATATTATCTNAAAACAGGNGGTCATTTTGTTATTTCAATCAAGGCTAACTGCATAGACTCCACAGTCCCTGCTGAGGCAGTGTTTGAAAGCGAAGTGAACAAGTTNAAGGCNGATCAATTCAAACCATTCGAGCAAGTCACCCTTGAACCATTTGAGAGGGACCATGCCTGTGTGGTTGGTGGATACAGAATGCCCAAGAAGAAAAAAGATGCTGCTGAGTAGATTGNTTTCCAGTAGCCNGTAGGCGTGTACCAATGTNATTTCATGAGATTTNGTGTTAATTTTGTTTCGAAACCTTGGTTATAAAACAGTTCTGTTTTGAATTTTG…
Gma.10924.1.S1_a_at	BE820846	At3g62840	2e-39	Post-Transcription			GTGTTAAAAATAATACTCAGGTACTGATAAATTGTCGGAACAACAAAAAGCTTCTGGGTCGTGTAAGGGCTTTTGACAGGCACTGCAACATGGTTCTTGAAAATGTCAGGGAGATGTGGACTGAGGTGCCAAAGACTGGTAAAGGAAAGAAAAAGNCCCAGCCAGTCAACAAGGATAGATTCATCAGCA
Gma.11121.1.S1_s_at	CD395997	At1g11650	8e-76	Post-Transcription			TGGTTACCAAGCTCCTCAACAACAGCAGCAAATAGGATATAGTTGAGAAGAGTCTGTTCCTTTTCTTCTGTAATCTTTTATGATACTTATCGACTTGCGTATCTCTTATCTCGTGGAAAACCCACTCTGCTACTTTTTTCCTTTGTTTGCTTAGTAACAT
Gma.11121.2.S1_at	BM519870	At1g11650	1e-118	Post-Transcription			GACCCTGTTGGGTGGTCAAAATGTTCGTCTTTCATGGGGCCGCAGTCCTTCAAACAAACAGGCTCAGGCAGATCCAAACCAGTGGAATGGTGGTGCTGGTTCTGGTGGTGGATACTATGGGTATGCTGCACAAGGTTATGAAAATTATGGGTATGCTCCTGCTGCTGGACAGGATCCCAACATGTATGGCAGTTATCCGGGGTATCCTGGTTACCAACCACCTCAGCAACAGNCAACAAATAGGATATAGTTGAGAAGAGAATGTTCCTTTTCTTCTGTAATCTTTTGTGATACTTATCGAGTTGCGTGTCTCTTCTCGTCTCGTGGAAAA
Gma.11121.2.S1_x_at	BM519870	At1g11650	1e-118	Post-Transcription			ATGTGGGTTTGTCCAATTCGCAGACAGGAGCTGTGCNGAAGAGGCACTTCGGGTGTTGAATGGGACCCTGTTGGGTGGTCAAAATGTTCGTCTTTCATGGGGCCGCAGTCCTTCAAACAAACAGGCTCAGGCAGATCCAAACCAGTGGAATGGTGGTGCTGGTTCTGGTGGTGGATACTATGGGTATGCTGCACAAGGTTATGAAAATTATGGGTATGCTCCTGCTGCTGGACAGGATCCCAACATGTATGGCAGTTATCCGGGGTATCCTGGTTACCAACCACCTCAGCAACAGNCAACAAATAGGATATAGTTGAGAAGAGAATGTTCCTTTTCTTCTGTAATCTTTTGTGATACTTATCGAGTTGCGTGTCTCTTCTCGTCTCGTGGAAAACCGAC…
Gma.11337.1.S1_at	CD402585	At1g80070	1e-160	Post-Transcription			GACTTGCAGCTTTACTCCTGGTTCTTGTTCTTTAACTGCATATAAGCTCACTCCATCTGGTTANGAATGGGGGCGTGTNAATAAGGATACGGGAAGCAATCCACATGGTTACCTTCCCACCCATTATGAGAAGGTTCAGATGCTCCTTAGTGATCGCTTCCTTGGTTTCTACATGGTTCCTGATAATGGTCCATGGAATTACAACTTCATGGGGGTGAGACACGCATCAGGGATGAAATATGGAGTGAAGCTNGGGACTCCTAGGGAATATTACCACGAGGACCATAGACCAACCCATTTCTTAGAGTTCAGCAATATGGAGGAAGTGGAGANANCTGCTGAGGGAGATCGAGAGGATACATTCTCTTGAGAGATNNNNNNNNTTTTGTTTGAGATATA…
Gma.12187.1.A1_s_at	AW734314	At1g66260	8e-12	Post-Transcription			GGGACGTCGAGGTGGCCCAAGGAGTGGCAGTGGACGTGGTGGAGCTGGAGGTCGAGGTCGTGGTCGCGGCAGGGGTGGAGCTGGAGGTAGAGGTCGTGGGAGAAAGGACGCTGTTGAGAAGTCAGCGGAGGAACTTGACAAGGAGCTGGAGACCTATCATGCTGAGGCCATGAACATCTCTTGATCTCGGAAGCCNCAGTTTATTTTGTAATATTACTTAAGATTGGCTTCCTTGTACNAAAGCTCGTTTCCTTGGCGTTTACTTTGAATCTCTTACTGCTTGGTGCTTTTAAACATGCCATC
Gma.1437.1.S1_at	CD392202	At1g49760	2e-68	Post-Transcription			CAGCCAATGCCCATTCAAGCTTTGGCNACNGCNCTNGCAAATGCTCCNCCNGAACAGCAGAGGACTATGCTCGGTGAAGCTTTATACCCNCTTGTGGATCAGCTGGAACANGATNCTGCNGCAAAGGTTACNGGCATGCTTCTGGAGATGGACCAGCCTGAAGTTTTACATCTGATTGAGTCACCAGATGCTCTGAAGGCAAAAGTTGCTGAAGCCATGGATGTGTTNAGAAATGTTGCTCAACAGCAAACNAACCCAGCTGATCAACTAGCNTCACTCTCTCTCAATGACAATCTTGTGTCTTAGATTCCNTTAGTCNTTTGACNNGAATCTGNNNNCCAGTTATTNCTATNCCGTANGCTNCCCNCCAGTTTATTTGCAGGTGTCTTAGATGTTTTG…
Gma.15880.1.S1_at	BE823347	At2g30410	6e-46	Protein Destination & Storage			GAAGGAGCTGCATTCTTATGAGAAGGAAGTTGAGAGAGAAGCTGCCAAAACAGCTGATATGAAGGAAAAAGGAGCCGATCCCTATGATCTCAAGCAACAGGAAAATGTCTTGGCTGAGTCTAGGATGATGATTCCTGACTGCCGCAAGCGCCTTGAGGCCGCTTTGGCAGACTTGAAAGGATTATTGGCTGAGTTGGAGGAGTCGGATGAGAAGGCCAGTCCTGAGATTGATGAAGCTCGGAACACCATCGTAGAAGTTGAAAAAGTATTTGAAACAACAGAAGATTAACAAGGTTGTTTGATTAGTGCTCTTGATGGAGGATATTGGACCTGTATTGTACATTTTCCTGGTCACAAACAATCATACATTCTTCTTGTTCCATGTGCCCTCTCCTCCAC…
Gma.12475.1.S1_at	CD392558	At4g01000	8e-21	Protein Destination & Storage			AAATCAACTCCCCTGGATGAACTTCCAAAGAAGCTGNTTGCGAAGAAGTAAGGAGANTTTTGANANGGCAGTTNTTTCTCTGTACAGTATTTCNTAACTNTTTGCACCTTNTACNTGGGTGTCAGTTNTATCCTCTGATGACTTNNGGAACTNNGACTGATGCATGCCTTTTCTGTTCGTTTTAGTGTTCATATTGGGCTGTATTTTGATGTAATAAATACCGTTACCAGCNAGCCAAAGGAAGCTGAACACTGTATAACCCAAGAAT
Gma.1258.1.S1_at	AW433155	At1g14980	2e-09	Protein Destination & Storage			GCACTGAATGTCACGATGCCGATTTTTTATTTTGCTGTGGATTTCGTGTGAGCGTTATTGATTCGTTCTACACATAGACGTTTATTGTTGTTGATTTATACTGTAATTCGTTACGGAGTGATGATTATTACGCGTTGATGTTGATCTATGTATACTTGAGAGAGAGAGAGAGAGAGAGAGAGAGAGAGAGAGATTTTAATTGTTTATGTATAAAATCATTTGTTATAGGTGTTAGTGAGAAATGAGATCCAAAAATTCTTGTATCCTTCTTCAGTGATTATTATTTTGATTTCAGTCTCANNNNNNAANNNANNANANNNNNNNNAAANNNANNANNNANNANCCTCGACCTCCAGGCTAAATTCTGGAAAAGTTATTGCTGTTGCCCCTGGCTTTCCC…
Gma.13248.1.S1_at	BM523367	At1g64230	1e-69	Protein Destination & Storage			GGAAGTATATGCCTTGACATTCTAAAAGAACAATGGAGCCCAGCACTAACCATTTCTAAGGTCCTTTTGTCCATTTGCTCANTGTTGACGGATCCCAACCCTGATGACCCGCTTGTGCCTGAAATTGCCCACATGTACAAGNCTGACANGGCTAAGTATGAAGCCACTGCTCGTAGCTGGACACAGAAGTATGCCATGGGATNATCATGCTCCTCCTTTAGCTGCNCANTNNANNTGNNNNATNNTNNTTTATGAAGAAACAANATNTACTTTTAATGAATGTTTTNTCTTTTTTTNGTCAGTGNAAATCAACCATGGTAAGGGAATTGATNNTNACTTNGTGAATATTTCTTTGCAAGACATCGGTCATGGNNNNNNNNAAGAAATTGTNNTANAATG…
Gma.13205.1.S1_at	CD390316	At4g38630	6e-13	Protein Destination & Storage			TACAAAGGATCAAGGCAGCCAGTCAGACATGAGCAAATTGTTGGCCGATCAATCCTTTGTATCTTCTATCCTTGCATCGCTTCCTGGGGTTGACCCAAATGACCCTTCTGTCAAGGATTTGCTGGCTTCCATGCAAAATCAGTCTGAGCCTCAACAGAAGAATGACGACAAGCCATCAAACGAGGAGGAGAAGAAGTAATCTTTGAGAACCACTTTGCCCTGTATGGTTTTATTTTCTTGGTAGCATTCTTCGCGGCTGTTACTAATCGGGGGAACTATTTACGCATGTTTCAATGTGTCTCTCTGCACTTTAATTGGAACCAATGCATGTCTCTCGATTGAATATTGGATGATTTTTAACTTAAAATGTTCTTGATTATCATGCCTTGTTCTTGGTTG…
Gma.11131.1.S1_at	BI968388	At5g59720	3e-19	Protein Destination & Storage			CCGGCTTGGAATTCGGATTCGGATTCGGATCATCCGTGAACACACGTGTGGACTGGAGGGAGACTCCCAGAGCGCACGTGTGGAAGCTGGTGCTTCCCGGCTTCTCCAACGAGGACGTGCTGGTTGAGCTCCAAGACGAGAGGGTGCTCCAAGTCAGCGTGGAGAGCGGCAACTTCGTCACGAGGTTTAAGGTCCCCGACAACGGTAACCTAGAACAACTCAAAGCCAACATGCGTCACGGGGTTCTCGTTGTCACTGTTCCCAAGTTTCATCAACCCACTACTACTGCCCCTGCCAATAGGAATGTCAGGGAAGTTGAAATTGAAGGCACCGACTGAACCCAGTGACCAAAACGCTGTCTTTAATCATGTCTTGTTCGATGGAACTGTGTTTTCTTAT…
Gma.11115.2.S1_at	BU764731	At3g12580	0	Protein Destination & Storage			GGCCAAAAATGCATTGGAAAATTATGCCTATAACATGAGGAACACAATCAAGGATGACAAGATTGCTTCCAAACTGTCTTCT
Gma.11115.2.S1_s_at	BU764731	At3g12580	0	Protein Destination & Storage			TTGTTCTTGATTTTGTCAAAGACCCTTTTGAAGTTTAGATAACAGCGTGTCATTATGTTTTTATTGCGATTTTATTTTTCTCTT
Gma.11119.3.S1_at	CF922781	At5g53300	2e-83	Protein Destination & Storage			ATGCCATGGGCTAATTGACATAGAGAAGAGAGCGATTTTTACTTTCAGTGTTTAGGCCAAACAGCCTTGTATGAATATTTGTGGTCTTCGATTAAGGCCCCTCCAGTTGAAGATGAATGGGGAAATATTTCTTCTGTTGTCTGTATTGCAGAATGCAAACGCTACTTTTAAAACAGTGAAATGTAAGCCCAATTAAAAAGTTTAAAATTTTAANNNNNNANNNANAGTATTGTCGAATATTTAGAGAATGATTGGTTTGCTCTGTTATTC
Gma.11119.4.S1_at	BE555322	At4g27960	1e-84	Protein Destination & Storage			TGCTCAAGTTTTTAACCGTTCTATTAAGTGCCATTTCATGTTTTTCTTTTGTCATTTATGAACTTA
Gma.11119.4.S1_x_at	BE555322	At4g27960	1e-84	Protein Destination & Storage			GAGCCCTGCGCTAACTATTTCAAAGGTGTTGCTCTCAATTTGTTCCCTGTTGACGGACCCTAATCCTGACGATCCTTTGGTCCCTGAAATTGCCCACATGTACAAGACAGACAGGAACAAGTACGAGTCAACTGCCAGAAGCTGGACCCAGAAATATGCCATGGGTTAAGTGACCTTGTGGTATGTTTGAGGGAGAGCCTTTCTACTCTCAGTGTTTAGGTCTCTCAGCCCTTGTAGGAATATTTGTCGTTTTAAATCATGATTAAGGCCCCTCCAGTTGAAGATGAATGGGGGAAAACGTTTCTCCTGCTGTTTGTATTGCAAATGTTCATGGTAATTTAGAACAGTGAAATGTTGCCCCAATTAAATGTTATGCTCAAGTTTTTAACCGTTCTATTA…
Gma.11119.5.S1_at	BI315933	At4g27960	4e-84	Protein Destination & Storage			TTAAGTGACCTGTGGTATGTGTGAGGAAGAGCCTTTCTACTCCCAGTGTTTAGGCCTCTCAGCCCTTGTATGAATATTTGTCGTTTTTAATAAGGCCCCTCCAGTTGAAGATTAATGGAGCAAAACGTTTCTCCTGTTGTTTGTACTGCAAATGTTAATTTAGAACAGTGAAATGTTGCCCCCAATCAAATATGCTCAAATTTTTAACCGT
Gma.10966.1.S1_at	CD396963	At5g23540	1e-148	Protein Destination & Storage			GATGTTGCTTAATCTTCACAAGAAGAAATGGACTGATGGTTTGACACTTCGGCATTTTGATACACATTCNAAAACTAATGAACAGACTGTACAGGAAATGNTGAACTTAGCTNTCAAATATAACAAGGCTGTTCAAGAGGANGATGAGCTGCCTCCAGANAAGCTTGCAATAGCAAATGTGGGAAGACAAGATGCAAAGAAACATCTCGAAGAGCATATCTCAAATTTGATGTCTTCCAACATCGTTCAAACTCTCGGAATGATGCTTGATACTGTTGTCTTCTAGAGTCATTATTTTGGACCTTCTGGTTTCTGTAGCTGTGCTAAGGAGACAATTTGAGTTATTACAATCACTGTTTCCTTATTCTT
Gma.11169.1.S1_x_at	BI702093	At3g52590	2e-66	Protein Destination & Storage			CCGCAAATGCTATGCTCGTCTGCACCCTAGGGCTGTGAACTGCCGTAAGAAGAAGTGCGGTCATAGTAACCAGTTGAGGCCTAAGAAGAAGATCAAGTAAATTCTGGGTGGGATATTGTTGGTCTCTACTTTCGTTTTGTTTGTCTTAGAACAGTGACTTGTTTGGTATTTATCGTTTCTGGTT
Gma.11169.3.S1_s_at	BI943988	At3g52590	2e-39	Protein Destination & Storage			GAGCCTTCCCTCATGGCTTTGGCTCGCAAATACAACCAGGACAAGATGATTTGCCGC
Gma.11179.1.S1_at	AW350100	At5g02500	0	Protein Destination & Storage			TGCTGGTGCAGCAGAGGATGAGTATGCTGCTCCTCCTTCTGGTGGAAGTGGTGCTGGCCCCAAGATTGAGGAAGTGGACTAAATGTAGTTGCTTTCCTCCAGATACCTGTTTTAAAAACTTATTTTACTTTATGCTTTTTTAATTGGATTTTAATCGCATGATTTTTGTTGGA
Gma.11179.1.S1_s_at	AW350100	At5g02500	0	Protein Destination & Storage			TTGTTGGATGGGATTCAAACTATTTTTCCCTTCTGATATGAACGTTGCTTTAAGCATTATGTTATTTGCGTTATTTTCATTATTAGATGGTATACTCAATTGTTATGCACTTTACCT
Gma.11179.1.S1_x_at	AW350100	At5g02500	0	Protein Destination & Storage			TGCTGGTGCAGCAGAGGATGAGTATGCTGCTCCTCCTTCTGGTGGAAGTGGTGCTGGCCCCAAGATTGAGGAAGTGGACTAAATGTAGTTGCTTTCCTCCAGATACCTGTTTTAAAAACTTATTTTACTTTATGCTTTTTTAATTGGATTTTAATCGCATGATTTTTGTTGGATGGGATTCAAACTATTTTTCCCTTCTGATATGAACGTTGCTTTAAGCATTATGTTATTTGCGTTATTTTCATTATTAGATGGTATACTCAATTGTTATGCACTTT
Gma.11179.3.S1_at	AW423548	At3g12580	0	Protein Destination & Storage			GAGAAACTTGATCCTACTGACAAGAAGAAGATTGAGGACGCAATTGAGCAAGCTATCCAGTGGCTAGACAGCAACCAGCTCGCAGAAGCAGATGAATTTGAGGACAAAATGAAGGAATTGGAAAGCATCTGCAATCCTATCATTGCCAAGATGTACCAAGGTGGTGCTGGTCCTGACATGGGTGGTGCTGGTGCTGGGGCAGCCGAGGATGATTATGCTGCTCCTTCTGGTGGAAGTGGTGCTGGCCCCAAGATTGAGGAAGTGGACTAAATGTGTAGTTGCTTTCATCCATTTATCTGTTTAAAACTTA
Gma.11179.3.S1_x_at	AW423548	At3g12580	0	Protein Destination & Storage			GAGAAACTTGATCCTACTGACAAGAAGAAGATTGAGGACGCAATTGAGCAAGCTATCCAGTGGCTAGACAGCAACCAGCTCGCAGAAGCAGATGAATTTGAGGACAAAATGAAGGAATTGGAAAGCATCTGCAATCCTATCATTGCCAAGATGTACCAAGGTGGTGCTGGTCCTGACATGGGTGGTGCTGGTGCTGGGGCAGCCGAGGATGATTATGCTGCTCCTTCTGGTGGAAGTGGTGCTGGCCCCAAGATTGAGGAAGTGGACTAAATGTGTAGTTGCTTTCATCCATTTATCTGTTTAAAACTTATTTGATGCTTTTTTATTGNATTTTAACTTTTATGATTTTTGTTGGATGGGATACTAATTGTTTTGCCCGTGTGATATGAAC
Gma.10804.2.A1_s_at	CF921045	At1g80920	0.0004	Protein Destination & Storage			TAGAGTCTAGACCTACATACATGTTCCCACCCAAGTGGCTGGTGTTCTTTGTGTATAGTCCAAGTGAATGTAAAGTGAGTCCTCTCTCTCTGCATAATTGAAGATGAGGAAATGACTCTTTAATCCTTAAGCCTGTGCTCGGTGGAGAAGA
Gma.10883.2.S1_s_at	AW350627	At4g02890	1e-129	Protein Destination & Storage			TGGTGGTTTCTGAGTCTGTCTGTTATGTCCAATATTAGTTGAATTCTCTGTTGTTATGTCCAGTGTATGTTGAACTCGTTGGT
Gma.10799.1.S1_at	BG237181	At4g26100	1e-163	Protein Destination & Storage			AGTTGATAGGCACTGCCAACGTTGCNTGTGTTGCTAAGTTGAGCTGTGAGNAAATTNGGATCTGAACTTGAAATTCTGNCTTTGTATTGTTAACNCATCTGGTCAAACCGATGAAGCTGTGAAGCTGAAATAATTTGAGCNNAANCNAGGGATTGTGCTTGCTGTAAAGCTCAGTTTTAATTGGNNCTNCTNGCTGGAACTCCTAAGTTTTATAACATNNTTTTCTGNNAGTTATTATATTGGNTTACCAGATGTTTACAGTTTCACGNNNNTGGACTGCAAATGTCAAAANCTATCAAATACCAGCAAAAANTGTAATTAGCCATTGTACTCTTGTTGGATAAGATTCCCTTGGTTTACACGATGTAATTGTCTGGCAAATATTTTGGTATTAGGAAC…
Gma.10691.1.S1_a_at	BU550066	At3g08690	5e-22	Protein Destination & Storage			ATGGGCTAGCAAATTGGAATAACGCATTATATTATAGGATAGGACGTGTTCCTTCCATTTGTTAAAAGACATTAATGTATAATCTTTCTTTTCATTCCCGCTGTTGACGTATTGAGGATAAGTCTCGTGCTGTCCACATAACAATA
Gma.10691.3.S1_x_at	CA819213	At1g64230	1e-83	Protein Destination & Storage			AAGTTTTCCACCCAAATATCAACAGCAATGGTAGTATTTGTCTTGATATCTTAAAGGAGCAGTGGAGCCCCGCCTTGACAATATCTAAGGTTTTGCTCTCCATTTGCTCCCTATTGACGGATCCAAACCCAGATGATCCCTTGGTGCCTGAAATTGCTCATATGTACAAGACAGACAGGTCCAAGTATGAGACAACTGCTAGGAGCTGGACTCAGAAGTATGCAATGGGCTAGCAAATTGGAATAACGCATTATATTATAGGATAGGACGTGTTCCTTCCATTTGTTAAAAGACATTAATGTATAATCTTTCTTTTCATTCCCGCTGTTGACGTATTGAGGATAAGTCTCGTGCTGTCCACATAACAATAGGAGGATTTTGAGTTTGTTTGTATGAAAC…
Gma.10691.4.S1_a_at	BM523847	At1g64230	1e-65	Protein Destination & Storage			TAATGGGTCCCCCTGATAGCCCTTATGCTGGGGGTGGTTTTCTAGTTACTATTCATTTTNCTNCGGATTATNCATTCAAGCCACCCAAGGTTGNATTTAGGACTAAANNNTTTTCNACCNAAATATCAACAGCAATGGTAGTATTTGTCTTGATATCTTAAAGGAG
Gma.10691.4.S1_s_at	BM523847	At1g64230	1e-65	Protein Destination & Storage			TTGAGGATAGGTAACAGTGCGGTGCGGAGGATTTTTTAGTTTGTTTGTATGAAACTTCTCTTGTGAGTGCTGGGAATTGGGAAATACATGTAGCTGATATTCTTCTGT
Gma.17958.1.S1_at	BI969270	At5g60160	0	Protein Destination & Storage			GCAACCAATGTTGTCACATCCTTCATATTCAGGGAGATAGCATCAAAACATAAACTTCCCGTTCAGGACTTTGTGGTGCGCAATGACATGNNNTGTGGTTCAACCATTGGTCCTATTCTTGCTAGTGGCNTAGGTATTCGCACTGTTGATGTAGGTGCACCGCAGTTGTCAATGCATAGCATACGAGAAATTTGTGCTGTTGATGATGTGAAGNATTCATATGAGCANTTCAAGGCATTTTACNAAGAATTNTCTCATGTNGATGGTAAGATGGTCGTGGATATATAGGANTATCTCTAATCACGAAATCCTCATTNNNATCCTTTGCTCTAGAAGCTGTTGCTGAAATGGTCGTGTTTNGTAATTTAGTANCNNTATAATGCNGACNTTATTATNNNN…
Gma.17631.1.S1_at	U08383.1	At5g42020	0	Protein Destination & Storage			AAGATCACCGATTACAAACGAAAAGGGACGTCTTAGCCAGGAAGAAATTGANAGAATGGTTCGNGAAGCAGAAGGAGTTTGCNGAGGAAGACAAGAAGGTGAAGGAGAGGATCGATGCTCGCAACAGTCTTGAAACCTATGTATACAACATGAAGAACCAGATCAGTGACAAGGACAAGCTCGCTGACAAGTTGGAGTCTGATGAAAAGGAGAAAATTGAGACTGCTGTGAAAGAAGCANTGGAATGGCTGGATGACAACCAGAGTNTGGAGAAAGAAGATTATGAAGAGAAGCTGAAGGAGGTTGAAGCCGTTTGCAACCCAATCATTAGTGCTGTGTATCAGAGATCTGGAGGAGCCCCAGGCGGTGGTGGTGCATCAGGCGAAGAAGACGAGGACG…
Gma.1756.1.S1_at	BF324935	At4g32940	0	Protein Destination & Storage			TTGTGTCAGTATTCCTTCCAATCCCTGGAGTTCTCTGCAAAGGGGTTTCAGTGCATAATAACTCCCTGTAATGTGCACTAGTAAAGACCAAAGTATGATTATTGTTACATTATGTTACATGGTTGTACTTGTATATACATATCTTGTCCCACCTTTGTAAATACAATTGGGACACTACTAGGATTGGGAAGAAGGGTCTTTACATTTATAGTTTGGCAAATAGATATTGCAACTACCTTTGTATAATTCTATTTCTGAAGAAGCAATTACAATTTACAAGGGATGGTGCCATTTACGGCATAAGGATTAAGGAGGGATAAAGGGACCAATTGCTTTGGAATATCCACTCATTACAATGCATGTATGACAACACAT
Gma.1756.1.S1_x_at	BF324935	At4g32940	0	Protein Destination & Storage			TTGTGTCAGTATTCCTTCCAATCCCTGGAGTTCTCTGCAAAGGGGTTTCAGTGCATAATAACTCCCTGTAATGTGCACTAGTAAAGACCAAAGTATGATTATTGTTACATTATGTTACATGGTTGTACTTGTATATACATATCTTGTCCCACCTTTGTAAATACAATTGGGACACTACTAGGATTGGGAAGAAGGGTCTTTACATTTATAGTTTGGCAAATAGATATTGCAACTACCTTTGTATAATTCTATTTCTGAAGAAGCAATTACAATTTACAAGGGATGGTGCCATTTACGGCATAAGGATTAAGGAGGGATAAAGGGACCAATTGCTTTGGAATATCCACTCATTACAATGCATGTATGACAACACAT
Gma.17595.1.S1_s_at	BI967850	At5g41700	4e-84	Protein Destination & Storage			GGTCCTGCTGATAGTCCTTATGCTGGAGGTGTATTCCTAGTCACTATTCACTTCCCTCCGGATTATCCTTTCAAGCCTCCTAAGGTTGCCTTTAGGACTAAGGTGTTTCACCCGAACATCAATAGCAATGGTAGCATTTGTCTTGATATCCTNAAGGAGCAGTGGAGCCCTGCACTCACCATCTCTAAGGTACTGCTTTCTATCTGCTCATTGCTGACTGATCCAAATCCTGATGATCCACTTGTTCCGGAAATCGCTCACATGTACAAAACTGACCGGGCCAAGTATGAGGCCACTGCACGCAGCTGGAC
Gma.1751.1.S1_at	BE473710	At3g02090	0	Protein Destination & Storage			GCTGTTGTCAGTGATGTAATTGGCATCCTTCGCAATTACTCATTCCTGTTGAAAATGGTGTTTACTTA
Gma.1751.2.S1_x_at	AI443536	At3g02090	1e-177	Protein Destination & Storage			AGATATTGGCCGTCAGTTACTCACATATGGTCGAAGAATCCCGTTTGCTGAATTGTTTGCTAGAATTGATGCTGTTGATGCCAGTACGATTAAACGTGTTGCCAATCGATTTATCTATGACAAGGATGTTGTTATTGCTGCCATGGGTCCTATTCAGCGTTTGCCTGATTACAACTGGTTCAGACGTAGAACCTACTGGAACCGTTACTAGTTCATTATAGTTTTTTTTTTTNNGCCTCATTTCAACTTCATGGGAGGTCTGGCATAATGTTTTATTCTAATTTACAACATTTATGCCTCTGTTTTTCATTTATTTGTTATGGGCCTCTATTTTGTAACAATTTTGCAGTAATAAGTATGCTGTTGTCAG
Gma.17525.1.S1_at	BG839191	At5g56030	1e-150	Protein Destination & Storage			TGGATTTCTGGCGTTTTCTGAAATTCATGATAANNNNNNNNANNNNNTTGCTAACTTGAACATGATCACATCTTTAATCGTG
Gma.17525.1.S1_s_at	BG839191	At5g56030	1e-150	Protein Destination & Storage			GACAAATCCGTGAAGGACCTTGTTCTGTTGCTGTTCGAGACTGCTCTTCTCACTTCTGGTTTCAGCCTTGACGAACCCAACACTTTTGGAAACAGGATCCACAGAATGTTGA
Gma.17539.1.S1_at	AF034572.1	At5g35590	1e-126	Protein Destination & Storage			TTCAGACTGCCATTTCTGCCCTGCAATCAGTTCTTCAGGAGGATTTTAAGGCCACTGAGATTGAGGTTGGAGTGGTGCGGAANGANAATCCAGAATTCAGAGTTTTAACCACCGANGAAATTGATGAGCACTTGACTGCAATAAGTGAGCGTGACTGAGTTCTTGATAAGGAT
Gma.17931.1.S1_s_at	AW350692	At2g30440	6e-33	Protein Destination & Storage			TCCCCTGCCGGTTGAGAACATTGTTGGTAGGTCCATGTTTCGGTACTGGCCTCCATCCAAGGCATCTGACACTGATACCCATCGTAAACTCCCACCTGGTAACAAACCTGTGGCAATTTCTTGACATGATTCCCGCAGCTTTGTGAAGGTGATGAAGGTTTCCAGATACGGTCGTTTGTTCTAAATTGTTAGCTTGAGCTGACTTTGCACACAGTTTGGGATGAATATCTTATTCATTGATACAAATTTGTCGATGACCTAATAATACCATTAAGCGTTCATTAGTGCCATCTGAGAT
Gma.16887.2.S1_at	BG509166	At4g31300	1e-112	Protein Destination & Storage			GAAATGGAGCCCCACAACTCCTTGCTAGACATTCTTGGTGCCCCAGAGCCGATGAGCATGTGATGTGAAGAAGTTGCCGTGTTTCAGAAATGTTTCCTGATAGATTATATCTTGTCTTCTCTCTTTTATGAACTAGCTAACGATTTGTGTAGTCAATTACTTTGTTTGGTTGGATATTTTTGATGGTTGAGTTATATCCTTTTGTTACGTACCATGATTAACCTTTNTTTCCTTCATCATATAGCTCCAAAGTAACGTGTACTTTGGTGAATTGGTCTTGCATAGA
Gma.1686.1.S1_at	AW350956	At5g58290	0	Protein Destination & Storage			ATGGCAACTAACAGAGCAGACACCTNTGGACCCTGCTCTGTTGCGTCCTGGAAGGCTTGATCGTAANAATTGAGTTCCCTTTNGNCCTGATAGACGCCAANAAGAGGCTCGTATTTCAGGTTTGCACAGCCAAAATGAACTTGAGTGATGAGGTAGACCTAGAGGATTATGTTTCTCGTCCTGACAAAATCAGTGCTGCTGAGATAGCAGCCATTTGTCAAGAAGCTGGAATGCATGCTGTTCGCAAGAATAGATATGTCATACTGCCGAAGGACTTCGAGAAGGGTTACAGGACAAACGTGAAGAAGCCTGATACTGACTTTGAATTTTACAAGTGATGATGTTGTAGCTTTGAGATTGGTGTGTGTACTCGCGAAGTTAAATATACAGTGAAGGGGG…
Gma.1686.1.S1_x_at	AW350956	At5g58290	0	Protein Destination & Storage			ATGGCAACTAACAGAGCAGACACCTNTGGACCCTGCTCTGTTGCGTCCTGGAAGGCTTGATCGTAANAATTGAGTTCCCTTTNGNCCTGATAGACGCCAANAAGAGGCTCGTATTTCAGGTTTGCACAGCCAAAATGAACTTGAGTGATGAGGTAGACCTAGAGGATTATGTTTCTCGTCCTGACAAAATCAGTGCTGCTGAGATAGCAGCCATTTGTCAAGAAGCTGGAATGCATGCTGTTCGCAAGAATAGATATGTCATACTGCCGAAGGACTTCGAGAAGGGTTACAGGACAAACGTGAAGAAGCCTGATACTGACTTTGAATTTTACAAGTGATGATGTTGTAGCTTTGAGATTGGTGTGTGTACTCGCGAAGTTAAATATACAGTGAAGGGGG…
Gma.17363.1.S1_at	AW471877	At1g35620	0.002	Protein Destination & Storage			TTGTGGTGGCAGTACTGATGCTAATTCAGACATTCAGTAAAGGAGGTGATGAATACCAGAGTGTACCCAATCAAGTTCAAACTGATCATGCAATCAGTTCTGTTTCTGAAGCNNNANNCNNNNNGTATAAACCTGGTGACAAGNAAGACTAAAAATTAACATAATACATTGATAATTAATGAACGTGGTCAGGAGTATTCTAGAAAGTAGCTGGCTTTAGAATTACCATACCTATTGGTATGAGTAAATATTTTGAGTTTGTGTATCTCCATAATTTTGAATACTGTTCAAACTCTTGCCTTTTGATTTACACCTTTCCACTAGTTATTTCTT
Gma.17451.1.S1_at	AW350045	At5g20620	0	Protein Destination & Storage			CAAAGAGGGGATTCCACCAGACCAGCAGAGGCTTATCTTTGCTGGGAAGCAGCTGGAAGATGGTCGTACTCTTGCTGATTATAATATCCAGAAGGAGTCCACTCTGCATTTGGTGTTGAGGCTTCGTGGAGGTATGCAGATATTTGTGAAGACTCTGACAGGGAAGACCATTACCTTGGAGGTGGAAAGCTCTGATACTATTGACAATGTGAAAGCTAAGATTCAGGACAAGGAAGGTATCCCTCCAGATCAGCAGAGGCTCATTTTTGCTGGGAAGCAATTGGAAGATGGTCGTACCTTGGCAGATTACAATATTCAGAAGGAATCCACTTTGCATCTTGTCCTTCGCCTTCGTGGTGGTTGCTAAGGGGAATCCCTTTTATGAAGTGTTCTCATATG…
Gma.17451.1.S1_x_at	AW350045	At5g20620	0	Protein Destination & Storage			CAAAGAGGGGATTCCACCAGACCAGCAGAGGCTTATCTTTGCTGGGAAGCAGCTGGAAGATGGTCGTACTCTTGCTGATTATAATATCCAGAAGGAGTCCACTCTGCATTTGGTGTTGAGGCTTCGTGGAGGTATGCAGATATTTGTGAAGACTCTGACAGGGAAGACCATTACCTTGGAGGTGGAAAGCTCTGATACTATTGACAATGTGAAAGCTAAGATTCAGGACAAGGAAGGTATCCCTCCAGATCAGCAGAGGCTCATTTTTGCTGGGAAGCAATTGGAAGATGGTCGTACCTTGGCAGATTACAATATTCAGAAGGAATCCACTTTGCATCTTGTCCTTCGCCTTCGTGGTGGTTGCTAAGGGGAATCCCTTTTATGAAGTGTTCTCATATG…
Gma.16719.1.S1_at	BI970910	At3g11910	1e-180	Protein Destination & Storage			AATTCTTTCTGTCAACGGATCTCAACACTGTCTGCCGACCACNGCCCGTTGAGCTTTACTACTTCCAACTNNGTGTGGAAGTTGTTCAAGTTGNGGTCATTGATCATCATCACTNNACTGTANCAGTACATAAGATTTTTGGATTAGTGAGTGTATACAGGGTATAGTTGGTTGACTNTTTTTTTNNNNNGTTCATCTTGATTGCTTCCAGATTTTGTTCANTCAGTAGTGTTANTTTAAGTGANGGGCTGCAAAATGGTGTNNNGCAGAGTTAATGTAATGTTGTAAAAGAGACTCGC
Gma.1634.1.S1_at	AF169022.1	At3g44110	1e-156	Protein Destination & Storage			ATGATGACATGCCTGGTGGTGCACAGAGGGTACAGTGCGCCCAGCAGTAATGACTTTGTGTGGAAGCTAGATTCAGAATTGATGAAAATGATGATANNANNNTNATACTGTTGATGTTCCATAACTGTAGTGTGTGGCTTAAAGATAAGTAGTGTTTGATGAAATGATTGTGAGAAAGTGAACAGTGTATCACTTGCGTTTTTATTATTGTCGAAGGG
Gma.1602.1.S1_a_at	BI971053	At5g67380	1e-157	Protein Destination & Storage			ATAAGTATCATCTGGAGCTTGATCCTCAACTTGATGCACT
Gma.1602.1.S1_at	BI971053	At5g67380	1e-157	Protein Destination & Storage			ATAGCTAAGGTGCTTGGGACTGATGAANTGAANGCATATCTNAATAAGTATCATCTGGAGCTTGATCCTCAACTTGATGCACTNGTTGGNAGNCACAGTCGNAAGCCNTGGTCTAAATTNATCAATGCAGATAATCANCATCTTGTGTCTCCTGAGGCAATTGATTTTCTTGATAANCTCCTTCGATANGATCACCAGGACAGGNTAACAGCNAGAGAAGCAATGGCACATCCATATTTCTCTCANGTAAGGGCAGCTGANAGTAGCAGAATGAGGACACAGTAACTTNANNCANNNNNGGATCCATNANCNTGAGTTNNANATATNTGGGATTGTTTTATAATACNNCCTNAAATGTGGCATGGTTGCCTTCTNTNNNANNNATNNNTTNTNNNNNNT…
Gma.1602.1.S1_x_at	BI971053	At5g67380	1e-157	Protein Destination & Storage			ATAGCTAAGGTGCTTGGGACTGATGAANTGAANGCATATCTNAATAAGTATCATCTGGAGCTTGATCCTCAACTTGATGCACTNGTTGGNAGNCACAGTCGNAAGCCNTGGTCTAAATTNATCAATGCAGATAATCANCATCTTGTGTCTCCTGAGGCAATTGATTTTCTTGATAANCTCCTTCGATANGATCACCAGGACAGGNTAACAGCNAGAGAAGCAATGGCACATCCATATTTCTCTCANGTAAGGGCAGCTGANAGTAGCAGAATGAGGACACAGTAACTTNANNCANNNNNGGATCCATNANCNTGAGTTNNANATATNTGGGATTGTTTTATAATACNNCCTNAAATGTGGCATGGTTGCCTTCTNTNNNANNNATNNNTTNTNNNNNNT…
Gma.1605.1.S1_x_at	BI425139	At1g48900	0	Protein Destination & Storage			TATCCCGAAATATGAATGCCCAACACATGAGCAAAGTCCTNCCTCCTCAGATGCTGAAGCAAATNGGTGGCATGGGNGGGTTACAAANCTTGATGAAGCAGATGGGATCTGCCAAAGACATGATGGGAATGGGAGGAATGTTTGGTGNTGNTGGTGGTGNNNATTAGTTNATTGGCTTNTGAGCTGAGGATTNTTCCNGACCANAGNCACTGTCATTNNATTGTGNNNTTTTACNACTAGANTCGANTGAGCAGGTTATGCAGTTCAATNGGNGTTNGAGTGCCATCTGNAATAGCCGCAATGGGTGCAAGTGTCTCTTTTTGTAAAATTAAATNCTTNTTCCCTTTTTGTGTATATTTACTTATTTANTATTCAGAGNAATCAANNNNNNNAGTAATC…
Gma.2590.5.S1_at	CA935591	At1g63800	6e-78	Protein Destination & Storage			ATTTCATGTTTAGCACTTTCAAGTGANTNNNNTGTGCTGTTTAGCCATGGTAATTTAATCAACAATGTTAGCACANNGTGTATAAATGACACTCCTTGTATTGGGTGATTCATGTTTGTTCCATTAAA
Gma.2534.1.S1_s_at	BI967545	At4g02890	1e-169	Protein Destination & Storage			GAAGAACTTTGATGTTTAATGGGTCTGTAATAAT
Gma.2350.1.S1_s_at	BI970635	At5g60640	1e-174	Protein Destination & Storage			TCTCTTGTAATAGCCAAGATGGATGGAACAACAAATGAGCATCCCAGGGCTAAGCCTGATGGATTCCCCACTCTTCTCTTCTTCCCGGCAGGAAACAAGAGTTTTGACCCTATTACTGTTGATACAGATCGTACAGTGGTAGCCTTCTACAAGTTCCTCAAGAAACATGCATCAATCCCATTCAAGCTCCAGAAACCAACCTCAACTTCTGAATCCGATTCCAAGGGGAGCTCTGATGCCAAAGAGAGCCAGAGTAGTGATGTGAA
Gma.2063.1.S1_at	AB070857.2	At1g11910	1e-167	Protein Destination & Storage			TCCTTTGTGTTCTTCTTGTCAGATGCTTGTTCTTTGGATCCAGAATCAACTAAAACAAAAGGCAACGAAGGACAGAGTATTCAACTATGTGAATCAACTGTGTGAGAGCCTNCCAAGTCCATCTGGAGAGTCAGTGATAAGCTGTAATAGTCTTTCCAAGATGCCAAACATTACNTTCACAATTGGAAATAAACCTTTTGTCCTCACACCAGAGCAGTATATTCTAANAACTGGAGAAGGCATTACAGAAGTCTGCCTTAGTGGGTTTATTGCTTTTGATGTTCCTCCTCCAAAGGGTCCATTGTGGATTCTTGGCGAT
Gma.2587.1.S1_x_at	CD404912	At5g66140	1e-108	Protein Destination & Storage			CGTTGCTGAGATCGAAGCGGAGAAGGCAGCTGCAGAGGCTGCTAAGAAAGCCCCTCCTAAGGAGACATAATTTTCTGTTTTGTGTTATGCGAGCATTGTTCTTGCTAGGTATTGGCTGTACTCACTGAAGCTNAAAATTGATGCCATTGTGTCTGAGATTGATGCAAAGAAAACGGCTGCTGAGGCTGCAAAGAATACCCTTTCTAAGGAGACATGATTTTATGTTACTTTTATTTAGCTCGTGAATTGTTCTTGCTAGATGTTGGCCTAACTTAAAATGACTGCTTTATTGTTTTTGGGTACTGCCATTAGTGTTGGTCATATTTAATTGCATGTCATTATTATTGAAGTTCAATTGAGTAGGGTGATACACANCATCTTCATAGACAGGAGCTGGTT…
Gma.2954.1.S1_s_at	CD404770	At4g26840	2e-44	Protein Destination & Storage			GGAAGACAAGAAGCCAACCGAACAGGGAGCACACATCAACCTTAAGGTTAAGGGGCAGGATGGGAATGAAGTTTTTTTCAGGATCAAGAGAAGCACTCAATTGAAGAAGCTTATGAATGCTTACTGTGACCGACAGTCGGTGGATTTCAACTCCATTGCTTTTCTGTTTGATGGACGCCGCCTCCGAGCTGAGCAGACTCCAGATGAGTTGGA
Gma.2892.1.S1_at	CD398484	At1g29150	1e-110	Protein Destination & Storage			CATTCTAAGCGGTCCCTTAAGTTGTTTGAAATTGCTTTGAGGGACTACAAGGCACAGTTGGAGGAAGACCCAATTGTACACAGGCACCTTTCATCCTTGTACGATACCCTTATGGAGCAGAATCTTTGCAGATTGATCGAGCCTTTCTCAAGGGTTGAGATTGCACATATTGCTGAACTTATTGAACTTCCCACCGATCATGTGGAGCGGAAGTTGTCTCAGATGATTTTGGACAAGAAGTTTGCTGGAACATTGGATCAAGGTGCTGGATGCCTTGTCATATTCGACGATCCCAAGACTGATGCTATATATCCTGCTACTCTAGAGACCATTTCCAATGTTGGGAAAGTCGTGGACAGTCTTTATGTTAGGTCTGCCAAGATAATGGCATGAGCACTC…
Gma.3735.1.S1_x_at	CD391849	At2g02760	6e-78	Protein Destination & Storage			CGATTTGTGTCTCGCATGTTTCATCCAAATATTTATGCTGATGGAAGTATTTGTTTGGATATANTACAAAATCAGTGGAGTCCTATNTATGATGTGGCTGCTATACTCACATCTATCCAGTCATTGCTTTGTGATCCCAACCCAAATTCTCCTGCAAACTCTGAAGCAGCTCGAATGTTTAG
Gma.3735.3.S1_s_at	BU764012	At2g02760	2e-63	Protein Destination & Storage			CAATGTCGACTCCTGCTAGGAAGAGGCTGATGAGAGACTTCAAGAGGCTGCAACAAGACCCGCCTGCAGGGATCAGCGGTGCCCCCCAGGATAACAACATAATGCTGTGGAATGCTGTCATATTTGGTCCTGATGATACTCCATGGGATGGAGGCACGTT
Gma.3735.3.S1_x_at	BU764012	At2g02760	2e-63	Protein Destination & Storage			CATTCTCATATTATTGTCGCCACTTCGACCTCAATCACCCTCGCGCCCTCGCTCTTCCCTTCCTGGTGGCGACAATGTCGACTCCTGCTAGGAAGAGGCTGATGAGAGACTTCAAGAGGCTGCAACAAGACCCGCCTGCAGGGATCAGCGGTGCCCCCCAGGATAACAACATAATGCTGTGGAATGCTGTCATATTTGGTCCTGATGATACTCCATGGGATGGAGGCACGTTCAAGTTGACTCTCCAGTTTACTGAGGATTATCCAAATAAACCACCAACTGTGCGATTTGTGTCTCGCATGTTTCATCCAAATATTTATGCTGATGGAAGTATTTGTTTGGATATACTACAAAATCAGTGGAGTCCTATA
Gma.3543.1.S1_at	BE822399	At1g44350	1e-152	Protein Destination & Storage			GATTGTGGAACAGGCTAGTGTCTACAGATGCTTGGCAGAAGTTGACTTCTTTGAAAAGGAGTACACAATTTACCCTCCCACGGTTAATGATAACCGAATGTATGAGCATGTGAAAAAGGTGTCCATTGATTTGCTGGGTCATAAGAATTTCAGGGTAGTTCCACCTATGATGGGTGCTGAAGATTTCTCTTTCTACTCCGAGNTGGTTCCCTCAGGTTTCTTCTACATAGGAGTAAGGAATGAAACANTGGGGTCTACTCATACGGGACANTCTCCATATTTCATGATTGATGAAGACGTTCTACCAATAGGTGCTGCTGCTCATGCTAGTATTGCAGAGAGGTACCTCATTGANCATGGTTGATGTTGGAANATAGTTNAAAGANCNCTGCTCTTGTT…
Gma.3950.1.S1_s_at	CD393016	At2g39990	1e-111	Protein Destination & Storage			GTTGACAAAATTCCCTCAGATTTAGAAGGGATGGAAGCATCAATGCAACATCTGCTAGTCTTGATTGATGACATCTACAAATATGTTAACGATGTTGTGGAAGGGCTAGTTGCACCAGACAACAAAATCGGGAGATTTATATCAGATGCTGTAGGTTCCCTTCCCAAATTGTCCCCATCAGTTTTTGATAAGCTTGTGAATGACAGTTTGCAGGATCACTTGCTTTTGCTGTATTTATCTAGTATNACAAGAACGCAGCTTAGCTTGGCTGAAAAATTGAACACAGCTGCTCAGATTCTGTGATTCTTCCGCTTG
Gma.4089.1.S1_s_at	U21722.1	At4g25200	3e-42	Protein Destination & Storage			AGCGCTCGTCGCTACACTAGCAGGATTGACTTGCCGGACAAGCTCTACAAGATTGACCAGATCAGAGCTGAGATGAAGAACGGTGTGCTCAAGGTCGTTGTGCCGAAAATGAAGGAGGAAGAGAGGAAAGACGTGATCAGTGTTAAGGTTGAGTAGAACAACCCAAGCTGATTTGGCCATTTTGCATCGACACTACTCTTTAGTTTTCTTTTATTAGGTGGTGATGAATCTAGTTAGTAGATATAACAGCTTAATAGTATTGTTGCTGTGTTTGGTTTTGAAACTTCAAACGTATCTGTANTAATTGTTATATAGAGTTGTGAATGAGCTTGTT
Gma.5781.1.S1_s_at	CD415811	At5g42300	2e-28	Protein Destination & Storage			GCGAAGGACTTTAGGTTGGGATTTGGGAATTAGGGTTNTTCGCGTGGCGAAGATGATTGAGGTGGTTTTGAACGATCGATTGGGGAAGAAGGTGCGCGTGAAGTGCAACGACGATGATACCATCGGCGACCTGAAGAAGCTTGTGGCGGCTCAGACTGGCACAAGAGCCGACAAGATCCGCATCCAGAAGTGGTACACCATCTANNANGNNNNCANNTCACTCTCAAGGATTACGAGATCCATGACGGCATGGGTCTCGAACTCTACTACAACTAAACACAACAAGGTGTGTTTTATGCGTAATATACTATGTGCTGGGAATGGGATAAGCGCTAAATGTAATTCTGACTTGCGAAAGTTCCCATGATTTGAAATAATGTAC
Gma.5781.2.S1_s_at	BG508891	At5g42300	2e-36	Protein Destination & Storage			ATATTACTATGATCTGGGAATGGGATGAGGCGCCAAATGTAATTTTGACTTGCGAAAGTCCCTATGATTTGAATAATGTACATCCCCGAATGATATTGGGTATTACATACCGATGACACCCTAAGTTGCTTTGTTATATATAACCTATCTGATGACTTGTTGCTAAGCTTCATTAATCTGATCGGTGGAAGTGTTTGA
Gma.5792.1.S1_at	BG649960	At1g20200	0	Protein Destination & Storage			CAAATATTTAGGACGATGCGAATTCTGTTCAGAAGTTTTATTATTAGAAACTGTTACCCTGGAGGATTTATTGAATTATAGCATGACAATCTATTTTTCTG
Gma.5794.1.S1_a_at	CD400361	At5g56500	7e-85	Protein Destination & Storage			AAGTTGGAGCTGATATTGTGAAAAGAGCTCTTAGTTACCCTTTGAAATTAATTGCCAAAAACGCTGGTGTCAATGGTAGTGTTGTCAGTGAGAAGGTATTGTCCAGCGACAATCCAAGATATGGATATAATGCTGCCACCGGAAAATATGAAGATTTGATGTCTGCTGGGATCATTGATCCAACAAAGGTGGTCAGATGTTGCCTGGAACATGCAGCCTCTGTAGCCAAAACCTTCTTAATGTCAGATTGTGTGGTTGTCGAGATAAAGGAACCTGAGCCTGTACCTGCTGGAAACCCCATGGACAATTCAGGATATGGTATCTAGAGCAACGGCTGCTTCAGTGAGAAGA
Gma.5810.1.S1_at	AW309249	At3g26340	1e-125	Protein Destination & Storage			GTTACCCCAAGCACCGTGGAACAAGAAATGGTTGAGGCNACTGGNGCTTGATGAAGNAACTCGTGGATNTNNNTTTNAGTTTCCTTTGCTTGCNAGCNTATTTTGAACCNNNNGNATGAAACTGATTACTTTATAATTGNAAATTGACANTAGTTTGATAAATACAAGTGCTGTCCTATCCTGTTGTGTTTTNNATCAANNNATATTTATCATNNAAAATGATAGATTAGAGCNCATNTATAATGTGNAGTGNTTTAAATNGGTAAAGCAGGTCAGANGNGTATTGCNNGNTNTTGCTAATGTAATNCATCTTGCGATTAATGGTTTTCGTGGCAACTTCTGAAAGTTNTACAAGAANCTTCCTAGGGAGAATTGTGGTTCAATGTCTTCGACTGATTG…
Gma.5718.1.A1_s_at	BQ629764	At5g05080	2e-08	Protein Destination & Storage			GCTGTTAATGGTTCTTCTGCTGCTACAGTCATATCTGCTGCTTCTGCACCACCAAAGAAGGAAGGTGGACAAGCAAAAGCTCAGGCGGACAAGAAGAAGATAGATGCCAGAAAGAAAAGTTTGAAAAGATTGTAATAAAAATCTTCAATCATTGAAGTTTTTTATTTGTGTTTTAGTTTTACATTTTGATAGAGAAAGAGGGGAGGGAGTNGGGGATGTGGTCTCCTGGGNTCAACATTTGCNTTATAAAACGAGTGAGGTATTTTCTTTGGGAGTAAAT
Gma.5686.1.S1_at	CA935460	At2g44680	1e-103	Protein Destination & Storage			ACATTTCCACACCTCTTCTTGATGACTTATGGACAACTGAAGCCACAGAAACCAGCACAAGGCTATGTTCCNAGAGTTTTTGGGTTCAAAGTTCACAAGCCATAAAGCNGAAGTTGAAGCTTTCATGAAAGTAAAAATCTNCCCGTGTCTCATTTAACTCTTCNTTATGGTTCTCTTTGCAACANCNGGCNAATCATATGCTTTCCAAACCAGTACAATCTAGGCATCTGTTTTANTTGTTATAGGAGCTTGTTGTAAAGAAATATGCAGACATGNGAAGCAAGTGCTTAGTTTCAGCTTCNGATTCAATGAGNAAGTGCTTAGGTACTTGATGATACTTTTTAATGACTNTTTACGAATTGTATTCTTGCGATTAACTTAATATT
Gma.5649.2.S1_at	BI785611	At2g47470	1e-137	Protein Destination & Storage			GAAAGTTGCCACAGCATTTAAATTGGAGGAAGATGTAGTAATTGCAAATCTGGATGCTGATAAATATANGGATCTGGCTGAAAAGTANGANGTGAGTGGATTTCCTACCTTGAAGTTCTTCCCAAAGGGCAACAAAGCTGGTGAAGANTACGGAGGTGGAAGAGACTTGGATGACTTTGTGGCTTTTATCAATGAGAAATCTGGANCAAGTCGAGATGGAAAAGGACAACTTACTTCCCAAGCTGGTATAGTAGAAAGCTTGGATGTCTTGGTAAAGGAGTTTGTAGCTGCCAGCGATGAAGAGAAGAAATCCGTGTTTACCCGATTGGAAGAGGAAGTTGTGAAGCTTAAGGGTTCCGCCTCAAGGTACGGGAAGATTTACTTGAAAGCTGCCAAGAA…
Gma.5204.1.S1_at	BE022964	At1g73760	2e-59	Protein Destination & Storage			CAATTTTGGGATGATACATCAAAGCNNCAAGTAGATAAAGAGTGCAGCATTTGTCAGGAGGAGTATGAAGCNGGNNATGAGTTGGGGAGGCTAAATTGTGANCACANNTATCACTTTCAGTGTATAAAACAATGGGNTGCACAAAAAAATTTCTGCCCAGTATGTAAGCAACAAGTTGCGGCTCGACACTGAGTGACNCAACCCTNCTNNTNTTTNNNNNAGCTTCCATTCTCATCCATAAATTTGTGTATAGTTTTNCATATCCAATACAAGCAAGANTTTTCATTCTNTGCTGTCAATNATCATTTCATNTTTCAAAATTCCTGCATCCTCTGCGAGNANTCGGCAATTATATGTTATNGAGTAAAGGTTTATATTCGGGCTGAGACCTTTGCATAT…
Gma.5204.1.S1_x_at	BE022964	At1g73760	2e-59	Protein Destination & Storage			CAATTTTGGGATGATACATCAAAGCNNCAAGTAGATAAAGAGTGCAGCATTTGTCAGGAGGAGTATGAAGCNGGNNATGAGTTGGGGAGGCTAAATTGTGANCACANNTATCACTTTCAGTGTATAAAACAATGGGNTGCACAAAAAAATTTCTGCCCAGTATGTAAGCAACAAGTTGCGGCTCGACACTGAGTGACNCAACCCTNCTNNTNTTTNNNNNAGCTTCCATTCTCATCCATAAATTTGTGTATAGTTTTNCATATCCAATACAAGCAAGANTTTTCATTCTNTGCTGTCAATNATCATTTCATNTTTCAAAATTCCTGCATCCTCTGCGAGNANTCGGCAATTATATGTTATNGAGTAAAGGTTTATATTCGGGCTGAGACCTTTGCATAT…
Gma.5421.1.S1_at	BI968175	At1g52600	2e-96	Protein Destination & Storage			GAATATGAAGTCAAAACTGCGGTCTAACTTCGGATGGTAGGGTGAGCAGAATATAATGGTAAGATTAAAAGATGAATCTGAAATCATTTTGTACCATTCATAGTATATGGGGGACAATATGATGTTAAGGATTTATGCAAAATAGTTGAATTTTGGTATATTCTTACTTCTTCCTACTCCTTGATGAG
Gma.5393.2.S1_at	AW598129	At4g39220	2e-62	Protein Destination & Storage			GCGTTTGTGATGACCTTTTTTTCCATGTTTGATGTTCCTGTCTTTTGGCCTATATTACTCTGTTACTGGGTTGTTCTCTTTGTCCTTACAATGAGGCGTCAAGTTGCACACATGATGAAATACAAATATATCCCCTTCAACTTGGGGAAGCAGAAGTATAGTGGTAAGAAATCTTCTGCAAGTAGCAGTGGCTCTCGTGCAGACTGAAACTTGGTTCTTATGATTTGAAGATCTACTAAGTTAGGTTTTGTGAACATTCAGGCTAGTTAATTTTCCCCCTTTTTTTAATGAAAGAATTTGTATTCTGGGTATTATGGATGCCAGTATGCAGTTACAGAAAATCTTAATGGTCCACTGTTCATGTTATACACGAATACGTGCTAATATTGGTAGAATTTC…
Gma.5575.1.S1_at	BU549678	At1g75950	6e-56	Protein Destination & Storage	Ubiquitin Degradation	SKP Family	AATGGGCGTTTGAATAAGTTTTATGATTCTGCTGCTTTTGAAATTTCAATGAAAAGATATGCCCTATAGTTTCTAGTTTATGTTTCTGACTATTTTGTTTGTTTTATTTATGTTTCGCGTATCAAACTTGTCTTCTTTTTTGAACTTGGGCAATCTTGAA
Gma.5581.1.S1_at	CD392224	At5g40580	1e-133	Protein Destination & Storage			TATCAAGGGCATGTCTCAGCTGCTTTNGTNCTTGGTGGGGTTGATATCACTGGACCTCATTTGCATACTATTTATCCTCATGGGTCAACTGACACCCTCCCATTTGCTACAATGGGATCAGGTTCACTTGCTGCAATGTCTGTATTTGAGTCTAAGTACAAGGAAAGTTTGAGTAGGGATGAAGGCATTAAGCTAGTTGTTGAGGCGATATGNGCTGGNATATTTAATGACCTAGGAAGTGGAAGTAATGTTGATGTTTGTGTGATAACCAAGGGACATAAGGAATATCTCAGGAACCACCTTCTACCAAATCCTCGTACCTATGTCAATCCAAAAGGCTTTGATTTCCCCAAAAAGACAGAGGTCCTCTTAACAAAGATTACACCGTTGAAGGAGAAG…
Gma.449.1.S1_at	AF243379.1	At2g30860	5e-69	Protein Destination & Storage			CAACTTGTGTCTTCATGGTTTGTTTGGTTCACTATTTGGTGTGACTCCAGATCCCAAGGTGATTGAGGAGAGTGAAGCAAAGCTGGTACAAGTGTTGAACATCTATGAGGAGAGGCTCTCAAAGACTAAGTATTTGGCTGGGGATTTCTTCAGCATTGCTGATATTAGCCACCTTCCATTTCTTGATTATGTTGTGAACAATATGGGGAAAAAGTATTTGTTAGAGGAGAGGAAGCATGTGGGTGCCTGGTGGGATGACATTAGCAGTAGACCATCATGGAACAAGGTTCTCCAGCTCTACAGAGCTCCAATCTAGTTGCTAAATGAGTTTCAGGGAAACTGCTATTAGTGTATCATCTTTGAATATGTTAGTCAAGAATAAATGTACTTTTAGCAGAT…
Gma.5122.1.S1_at	CD417588	At2g18040	2e-50	Protein Destination & Storage			GAAGGTTCTAGAAGGAAGGCCTCGTGGAAGGATCCTGAAGGTCGCATCATCAAGAGCACAACCAGAGAAAACGCGGTTTCTCAGCTCAAGGCCCTCCGCGACGACATCGTTTCGGGCAAGGCCTCCTTCGAGGACATCGCCTCTCGCTTCTCCGATTGCAGCTCCGCCAAGCGCGGGGGTGATCTCGGTCCTTTTGGTCGTGGCCAGATGCAGAAGCCTTTTGAAGAAGCAACTTTTGCTCTTAAAGTTGGTGAAATTAGTGACATTGTGGATACTGACAGTGGAGTCCACATTATTAAGAGAACAAAATGAGATTATTACACGGAGTAATCTCCTAATAAGGAGAGACATTAACATCTGTAGAATATTTCCAGGATTCTTGCTCAACTCAAGATCTGT…
Gma.5084.1.S1_at	AW309848	At1g07750	3e-78	Protein Destination & Storage	Storage Protein		GGAAGTGTGCATTAGAGACTCAAGTTGAGGCTGGTCATTTGCTTGTTGTGCCACAATTCTTTGTGGTTGCACAAATTGCTGGGGAAGAAGGAATTGAGAGTTACTCTATCGTGACAACTACAAAGCCTTTATTTGAAGAGTTGGGTGGAAGGGCATCAATTTGGAGCGCCTTGTCACCATCTGTGCAACAAGCATCTCTTCACGTGGATTCAGAATTTCAAAGCCTCTTCATATCCAAGATCAAGGAAACCACAAATCTCATTCCTCCCACTACTAATTAGTCACTTTGTTTATGCATATATTTATGTATTTTCAATGTATGATGTTGAGTGTTTACTTACCCTTGAGTNNCTTTTGGAGAAAAAGTCTGTGTTGCGATCAACCAGAAATGTTAAAATA…
Gma.7766.1.S1_at	BU550058	At5g12020	8e-36	Protein Destination & Storage			CCTAACTCGTACGTTTTCGTGATCGACATGCCTGGCCTNAAATCTGGGGACATTAAAGTGCAGGTGGAGGACGACAACGTGCTTCTGATAAGCGGCGAGAGGAAGAGGGAGGAGGAAAAAGAGAAAGAAGGGGGAAAGTATTTGAGGATGGAGAGAAGGCTTGGCAAGTTGATGAGGAAGTTTACTCTCCCTGAGAATGCCAACACCGATGCTATCTCTGCTGTCTGCCNAGACGGTGTGCTCACTGTNACTGTCAATAANCTGCCTCCTCCTCAGCCCAAGAAGCCCANGACTATAGAGGTCAANATAGCCTGAATTCCAACTTCCAACGCTATCTATCCCTGTTTTTGTT
Gma.7767.1.S1_at	AI494936	At4g21660	2e-28	Protein Destination & Storage			AGAGAAGTTGCGTAGTCAGCGTGAAGATTTCAGTGACATGGTTGCAGAGAACGAGAAGAAGAGGAAAAGAAAGATGCAAGAAAAGGAGGGCAAGTCAAAGAAGAGAGACTTCAAGTTTTAGGGTGCGCCTAGTTCGTTTCTTTTGCTGGAAGATGGGGGGGCTGCTACCCTTTTCTACTGGGCAAGTTCTAACATTCCATGAGCCATGAGTTGAGAATTTGTTGTTAGCAGGGGTCTCAATTGATAAGAATATATAATTATATACGACTATATATAATACAATGAAGACTCCATGCAGAGAACGTGGTAGTCAAGCTTTAGTTGAAAATTCAATACGATGAATCCTACCAAGGCTTTACGGATTCTGGCCGACATGAATGCATGTTACTTAGAGGAA
Gma.8018.1.S1_at	CD409445	At5g64350	1e-52	Protein Destination & Storage			TCAGAAATTCTGGAGCACAAAGGATCCTGGCCAGAACCCATTCACTTTCAAAATCGGCCAAGGTTCTGTTATCAAAGGATGGGATGAAGGTGTGCTTGGCATGCAAATTGGTGAAGTTGCTCGTCTCCGGTGCTCTCCGGATTATGCTTATGGTGCTGGTGGCTTTCCTNCTTGGGGNATACNGCCCAACTCTGTCTTGGAATTTGAAATCGAAGTCTTNAGTGCNCAATGAAAACCTTGGTAGTCTGTCTCTGTCCTAA
Gma.7176.1.A1_at	CD407127	At3g19170	5e-64	Protein Destination & Storage			GATGTAGATGCGTATCAACTTCCTGATGCCAAAGGTTATAGTAGTATGTTGCGGTACTTACTGGGTATCACAGAGGAAGAAAGGCAAAGGAGACGTGAAGAGATATTATCTACTAGTTTGAAGGACTTCAAAATTTTTATGGATGCTATGGAAGCAGTTAAGGATAAAGGGGTTGTGGTTGCAGTGGCATCTCCAGAGGATGTAGATACGGCCAACAAGGACCGTCCCGACTTCTTTCAAGTGAAGAAAGCCCTTTAGTTTCAGTATCTATTCCCCGCATGGATTTGAAATTGTATCTTTTCTTAAAATTTCATACATCGAAACNAATGTTTCCTTGATTATTTGTTTAAATAGGTTAACTGGCTGGAGCTAGATACGAGAATTTA
Gma.7226.4.S1_a_at	AW202090	At2g30870	3e-48	Protein Destination & Storage			TTCTTTTGTGACTGTTTTCTCGGGTTCATCATGTATTTTACTTANNNNNNNNNNNNNNNNNNNNAAAAAAAAAAAAAAANATNGNNNNNAAGNNNNNNGGTCCAACCTATGGATCCCCCAAGAGGGTCCTGGTGTGTCTGATTGAGAAGGAAATTGAGTTTGAAACAGTGCATGTTGATCTCTTCAAGGGAGAGAATAAGGAACCTGAGTTCCTTAAGCTGCAGCCATTTGGATCCCTTCCTGTTATTCAAGACGGTGATTATACTCTCTATGAATCTCGTGCAATAATCAGATACTTAGCTGAGAAGTATAAAGACCAAGGGACTGACTTATTGGGAAAGACAATAGAAGAAAAGGGTCTAGTGGAACAATGGCTTGAAGTGGAAGCTCATAACTTTC…
Gma.6468.1.S1_at	BU761589	At2g32920	8e-08	Protein Destination & Storage			TATGCTCCTCTCAAGAGTGCTTTTGAACTTGACCAGATTATAGAATTTGTGAAAGAAGCNTGGNCGTGGAGGCAAAGGGAATTTGCCCCTGCAAGGCACTCCAACCATTGTAAAGACAGAACCNATGGGATGGAAAAGATGGAGAAATAATTGAGGAGGATGAATTTTCTCTTGAAGAACTAATGGGGGAAGATGCTTCAAGCAAGGATGAGCTATGATCAATTTATAAGGAATTTATACCAAATTAAAGTTTCAACCACCGATTTTTACGTTACAGGCAACTTGTTTCTCATGATTATTGTGATCACTATTCTGTTTTTCCATGTTCCAAGTTAAAAAACCAGTCTAGTGATGAGTGATCTTCTCTGAGGATTTTGATATATGTCATTCAGTGGGTAC…
Gma.6719.5.S1_at	AW598355	At3g25230	2e-80	Protein Destination & Storage			GTTCATAGAGTACGATACTGCCTTTAGNGAAGAGGAGAAGAAGAGCTCCAAANCCTTGAAGGTTGCCTGTAATNTAAACAATGCAGCATGCAAGTTNAAATTAAAAGATTANAAACAAGCAGAGAAATTGTGCACAAAGGTACTGGACCTTGAGAGTACTAATGTGAAGGCTCTCTATAGAAGGGCCCAGGCATATATCCAGTTGGCTGATTTAGACTTGGCCGAATTTGATATTAAGAAAGCGCTTGAGATTGACCCTAACAACAGGGATGTCAAGCTTGAGTACAAGACTTTGAAGGAAAAGATGAAGGAGTACAACAAAAAAGAGGCAAAATTTTATGGAAATATGTTCAACAAACTGCACAAGCTAGATTCTCTTGACAGTAATAAACCAGCGTC…
Gma.6057.1.S1_at	BI968398	At1g05820	7e-28	Protein Destination & Storage			TATTTGGGACTATACCTGATGAACGGAAATGGACAACCTGCACTTCTCTACCTTGTTCCATGTACACTAGGTGTCACAGTCATACTGGGATGTATAAGAGGTGAGTTGGAGAGCCTTTGGAATTATGGCACAGACTCATCGTTGTCCACAGAGCCCCCTGGCTCTGAAGTTTAAATGATCACGTTATTCATCTTTTGAGGATTGAAGAAACTGAACTGCAACTTTGGGAAATGTTCTCAGCTCAGTGGTTAGGAAAGAAAGACACCAGGTGTACAGGCTCCGTAACTATCTTCTGTATTAATGCTTGAGTGCTCTTTATGGCTGCGTCATATTATACTACATTTCTCTTGTAAAAAGGATGAAAAGCAGATGGAAAAGTACGTATTCAAAATTCACCAT…
Gma.6014.1.S1_at	BE821831	At3g14290	1e-116	Protein Destination & Storage			TTCAGGGTCAGAAGGTGCCGACAGTTCTCTGCAAGAACAATACAANAAGGACCTAACTCTTCAAGAAGCTGAGACTATTGCTTTATCCATTTTGAAGCAAGTTATGGAAGAGAAGGTCACTCCCAACAANGTNGACATTGCCAANGTGGCTCCAACATATCATCTTTATACCCCNTCTGAGGTGGAAGCTGTGATAAGTCGTCTATGATTTTCTTTTNGTGACTTTCTNTATTCAACATTTGTGTTTCCTATCATTCCT
Gma.6411.1.S1_at	CD407435	At1g71950	1e-31	Protein Destination & Storage			GAGCCTGAGGCCTACCACATCAGAACCCTCACTTCAGTCCTTGGCAGTGAGGAGGCTGCAAAGGAAGCTTTGTTGTATAGTTACAAGTCTGCAGCCAGTGGGTTCTCAGCTAAGCTTACTCCGGAGCAGGTTGAACAGATTTCAAAGCTACCAGGTGTTCTTCAAGTTGTTCCTAGCAGGACATATCAGCTCCATGGACCAAATAACCTGCAGTAGAGAATGTTCACCTAAAGTTGTATCGGTTAAACCGTTATCTATGCCATGTATAAACTAAACTAGTGTGGCTCTAGACTTGTGCCAATAAGAACATGGAATTAATATATAATAATACATTACTAATATTTGTGCTATATGTTTATCAATGTGTCATGTATTCAAAGTGGCANNNANNGACCCTGT…
GmaAffx.80241.1.S1_s_at	AW397575	At1g06110	3e-05	Protein Destination & Storage			TATCAATATCTATCTATCTGTATCTAGTGTGGTGTAGTAATAATTCGATTACTTGCGTTCTTGANNNNTGTATTAACTTCCTATCCTTCATTCATTGTACAAATCT
GmaAffx.83218.1.S1_at	BQ628574	At4g20070	9e-20	Protein Destination & Storage			TTGGTTTTAGTTATCCTGTTATCAGGAAACGGCTCCAAGTTGTTTATCATGTTCTTTGCCACTGTCAAATTAAA
GmaAffx.8082.1.A1_at	BG511538	At2g44060	2e-11	Protein Destination & Storage	Storage Protein		GGAGCAATGAAACTGCCCATCACGAAAGAAGGTGGTACTACCCGTCTCAAGAAGAATGAAGACAGTGGAGATGACGAGGAGTGAAGAAGAAATGGCAGCAAGTTATTAGCATATGTTCTTTTATATACTAGGCCCATTAGAAAGTTAAGTAAAAGGGACTTGAACTTAAAGGCACTAATTCAGAGTTTGATGGTTATTTATCTATCTTGAAAGTTTCAAGTTGACGATTTGATTGTGTATGGTTATGGTTATTTATGTGAATATCAGTTTGGAGTTTGCTCTTCTCTTGAAGCCACGTTCCTGTTAGAGTACATAATTGATATGTTGTCAAAAAATTGTGTCAATTTTTTTAGTCCTAAATAAACTGTGAGTGGTTATGTTACCTTTTCTAATGGTTTA…
GmaAffx.5376.10.S1_s_at	BU082924	At2g18600	2e-19	Protein Destination & Storage			GCAAACCTTTTTCCCACGCTGTATTTAGACCTTTTGCACGATACCTTCAAGATCCTGTTCAAATATGTTATCAATGCATGAAGGCCCGTGGTTTGTAAAATTTATCAAAAAATTGGATTTTACTTTCGTCAGTTATGTTATTTTTCTTGG
GmaAffx.497.1.S1_at	CA784527	At3g12580	4e-69	Protein Destination & Storage			GAGGAAAACTTGACCCAGCTGACAAGAAAAAGATTGAGGATGCCATTGAGCAGGCCATCCAGTGGCTAGACAGCAACCAGCTTGGAGAGGCAGATGAATTTGAGGACAAAATGAAGGAGTTGGAAAGCATCTGCAACCCTATCATTGCCAAGATGTACCAGGGTGGTGCTGGTCCAGACGTGGGTGGTGCAATGGACGATGATGTTCCTGCTGCTGGAAGCGGTGCGGGGCCAAAGATTGAGGAAGTAGACTAAATTTAGTTTATTTCTGCTTTTGATTTACTATTTATTTTTAAATGTCTGATTTCATGTCCTTTGGTTGGATTTAGTTTCTCAAGAAAGACAATATTTGGTAGTATGTCATGTCGATTTATGTTTTCAGTATCATGTTACCCTTTTC…
GmaAffx.34785.25.A1_s_at	AW152939	At2g16600	7e-06	Protein Destination & Storage			TGGCCAGATTGTAGAGAAGTGAGTCTTGATACAACGATGTTTCGAGACATGTTTGTTGCTATTCAATGCAAATCACTAGTATTATAATAAGTGATTTGTGTAACTAGGAGTCAATTGTCCAGTATTAATGTAACTCTCAAATTTGTACTCCTAAATCTGCTTTTACATTTGTTCCANNNNAAAATGCGTAGCTGTCTGTAGTTGGTCAGAGATTACGTTGATAGAATTGTGGAAGCAATAGGCTCGAATATCTGTAGT
GmaAffx.22482.1.S1_at	AW185059	At3g46460	1e-46	Protein Destination & Storage			TTTCAATGCTATTATGAGTTTCCCATCCAATTACCCAAATAGTCCACCTTCAGTNAAGTTCACNTCAGAGATATGGCANCCCAATGTATATCCNGATGGCCGGGTTTGCATATCAATTCTTCATCCTCCTGGTGAGGATCC
GmaAffx.22482.1.S1_x_at	AW185059	At3g46460	1e-46	Protein Destination & Storage			TCTCCTTCAAAAGCAGCTCAAAGATCTTTGCAAAAACCCCGTCGACGGCTTCTCTGCCGGTTTGGTCGATGAAACCAACATTTTNGAATGGAGTGTCACCATAATTGGNCCGCCCGATACTCTNTACGAGGGGGGATTTTTCAATGCTATTATGAGTTTCCCATCCAATTACCCAAATAGTCCACCTTCAGTNAAGTTCACNTCAGAGATATGGCANCCCAATGTATATCCNGATGGCCGGGTTTGCATATCAATTCTTCATCCTCCTGGTGAGGATCC
GmaAffx.17961.2.S1_at	BG511562	At1g16030	1e-25	Protein Destination & Storage			CAAGCATGGGAGGTTGAGTCCTGAAGAGATGAGGAGAATGGTGAGAGATGCAGTGAGGTATAAGGCAGAGGATGAGGAGGTGAGNAACAAGGTGAGGNNNAANAACTTGCTTGAGAATTATGCNTTTGAAATGAGGGACAGAGTGAAGAACCTTGAGAAGGTTGTGGAGGAGACCATAGANTGGCTTGACAGAAACCAATTGGCTGAAACTGATGAGTTTGAGTACAAGAAGCAGGAGTTGGAAGAAAAGTTTCGGAAGTTTAGGTAATGGTAATTCTTGGTAGAACAAGTTTTAATGTTGAGTCCGAAGCAATGTAAAATAGTTCCAGCTTCTTTACTCAATCTAGTTGTCAGAGTGTGTATAACTGGTTTGTGCTTTATGTCTAAAATGTGAAAGTA…
Gma.8301.3.S1_at	BI321023	At1g23260	6e-67	Protein Destination & Storage			CGGTCCCCCTAGTACTGTTCATGAAGGGCGTATCTACCAGTTGAAATTGTTTTGCAGCAGGGATTATCCAGACAATCCTCCATCTGTTAGATTTCAAACAAGGATTAACATGACATGTGTCAATCAAGAAACTGGAGTGGTTGAGCCACATTTGTTTCCTATGCTTGCTAATTGGAAACGTGAGCGTACAATGGAAGACATTTTGATTCAATTGAAGAGAGAAATGATGTCTCCCCAAAATAGGAAGCTAACTCAGCCTCCTGAAGGCAATGAAGAATCCAGGGTTGATCAAAAGGGGTTGGTGGTGAGATGTTGTATTGTGTAATTCCGTGGAGAATCCAAGAATAATAATAATGTAAATAACTATATTCAATAGACCACTTCCTCCCTGGAGCAATC…
Gma.827.2.S1_x_at	BQ742526	At2g36060	7e-63	Protein Destination & Storage			GGTTTACCATGGAAGATATACTGACCCAGCTGAAGAAGGAAATGGCGGCTTCACATAACCGCAAGCTTGTCCAACCTCCTGAAGGTACTCACTATTAGTGTCCAAGATCANACNGATATTGGATCATATTGCATTTGCAGTATGCAATATATAGTATGT
GmaAffx.90373.1.S1_s_at	CF806098	At5g42300	6e-37	Protein Destination & Storage			ATATTACTATGATCTGGGAATGGGATGAGGCGCCAAATGTAATTTTGACTTGCGAAAGTCCCTATGATTTGAATAATGTACATCCCCGAATGATATTGGGTATTACATACCGATGACACCCTAAGTTGCTTTGTTA
GmaAffx.90984.1.S1_s_at	CF806709	At3g05950	1e-65	Protein Destination & Storage	Storage Protein		GATCATTTCGCACTGTCTAGTTATTGGATAATTGATCACTTTAATTATTATTTCAGTCACGCCATACATTAGACCTAATA
GmaAffx.91042.1.S1_s_at	CF806767	At5g56030	5e-11	Protein Destination & Storage			ATCTAACTTAATTATTGATTTGCCTTTGTGTTTTTAGAAACAATGATTGGGGAACAGTCTTTTACTATGTTTATGTTTTGAATTTTCGAAATTTTGGAATGTTGGCTAGTTAGGTGCCGTTTCCTGGATTAGTAGTGTATTTAGTTTCTATATGGA
GmaAffx.91367.1.S1_s_at	CF806415	At5g53300	7e-79	Protein Destination & Storage			TTAAGTGACCTTGTGGTATGTTTGAGGGAGAGCCTTTCTACTCTCAGTGTTTAGGTCTCTCAGCCCTTGTAGGAATATTTGTCGTTTTAAATCATGATTAAGGCCCCTCC
GmaAffx.89861.1.S1_s_at	CK606562	At4g02890	1e-159	Protein Destination & Storage			GAAGAACTTTGATGTTTAATGGGTCTGTAATAAT
GmaAffx.88721.1.S1_s_at	CK606003	At1g20200	2e-93	Protein Destination & Storage			AAGTGGGCTGTGATAGTGCGTTTACTGTTGGGAGAAATACCTGAGCGGACTGTCTTCATGCAGAAAGGAATGGAGAAAGCTCTAAGGCCTTACTTTGAGCTTACAAATGCTGTGCGGATTGGAGACTTGGAACTGTTTAGGAATATTGCGGACAAGTTTGCCACTACCTTTAATGCAGACAGAACCCATAATTTGATTGTTCGTTTGCGGCATAATGTCATCAGGACTGGTTTACGCAACATCAGCATCTCCTATTCTCGCATCTCTCTAGCTGATGT
GmaAffx.93316.1.S1_at	CF808110	At2g02760	3e-82	Protein Destination & Storage			GAAGGCATGAATTTGGTTGCAGTGATGGCAACTATAAGAATGATTGTGCAAACTCATCACATTTATATTCTCTGCTGATATGAA
GmaAffx.92767.1.S1_at	CF808492	At3g16480	4e-06	Protein Destination & Storage			GCATGTGATCCACCAGCTCATTATATTTTCTGGATCACAAGCATGCCTACTTCAAATTTTCGAGAGCAATATACACCGAATCAGCAATGCTGAAAATAAATCCCAGAGAAGTTTTTGTGCGGACCTGAGGAACCATTTATTCTGGTTCCATGTTTTTTTTAATTTTTTTTTATATAACGATTTGCCTTAGTGTATTAGGTGCATGGTCTCATGACTAATGCTCAC
GmaAffx.92623.1.A1_at	CF808348	At2g39940	6e-34	Protein Destination & Storage			GTTTCTATGTTCCTGCTCTATTTGTAGTTCATTTTAGACAATTAGTCTTGTAATAAGCCTGTGTTTTCATTTGAAATTCTGAAACGCTTCCCCTAACGCTATTGGCTCCCTTAAAAACTGAA
GmaAffx.92634.1.A1_at	CF809148	At1g63800	1e-79	Protein Destination & Storage			TCATCTCACCACATGTGAACTTATCATGGATAAGGGGGGAAATTCCCCTTCCTTCTAGTTTCCCAGTCGCTGTAAA
GmaAffx.92634.1.A1_x_at	CF809148	At1g63800	1e-79	Protein Destination & Storage			AGAGTTGAGTTACCGGATGCTTATCCTTACAAATCTCCTTCCATTGGCTTTATCAACAAGATCTATCACCCAAATGTTGATGAGATGTCAGGATCAGTTTGTCTGGATGTTATCAATCAAACCTGGAGTCCCATGTTTGATCTTGTTAATGTGTTTGAGGTGTTTCTACCTCAACTTNTGCTGTATCCCAATCCATCAGACCCCTTGAATGGAGAAGCTGCAGCTTTAATGATGCGTGATCGACCAAGTTATGAACAAAGGGTTAAAGAGTACTGTGAAAAGTATGCTAAACCTGAAGACATAGGGGAAGCCACAGAAGAGAAATCCAGCGATGAGGAGATGAGTGAAGATGAATATGACTCTAGTGATGAACAGGTTGTTGGTAAAGCAGACCCCTAG…
GmaAffx.92104.1.S1_at	CF807829	At3g13920	3e-69	Protein Synthesis			TTATGTAATGTTTCTCACTCTAACCTGTCTCCCCC
GmaAffx.92687.1.S1_s_at	CF808962	At3g02560	1e-84	Protein Synthesis			AACCGCAAGGCTGTTGTTATTCATGTCCCTTACAGATTAAGGAAAGGTTTCCGTAAGATTCATGTTAGGCTTGTCAGGGAGCTTGAGAAGAAGTTTAGTGGCAAGGATGTAATCTTGGTTGCCACCCGGAGGATTTTGAGGCCACCGAAGAAGGGTTCTGCTGCTCAGCGTCCTCGCAGCCGCACTCTTACTGCTGTTCATGAAGCAATGCTGGAGGATGTTGTATTGCCTGCTGAGATTGTTGGGAAGCGTGTGAGGTACCAAATTGATGGATCCAAGATTATGAAGGTTTACTTGGACCCAAAGGAGCGAAACAACACTGAGTACAAGTTGGAGACTTTTGCTGCAGTGTACAGGAAGTTATCTGGAAAAGATGTTGTGTTTGAGTATCCTGTCTCA…
GmaAffx.91658.1.S1_s_at	CF807383	At3g11400	6e-51	Protein Synthesis			GACTACTGGATCTGATATGCGGCGCAGGAATGATGAGAATTCTGTGAGGGTAACTAACCTCTCTGAGGACACGAGAGAGCCTGATTTGCTGGAGCTGTTCCGTCCTTTCGGTCCTGTCAGCAGAGTCTATGTTGCCATTGATCAGAAGACTGGCATGAGCAGAGGGTTTGGCTTTGTTAACTTTGTCAACAGGGAAGATGCACAAAGAGCTATTAACAAACTCAATGGGTATGGCTATGACAATCTCATCCTTAGAGTTGAATGGGCAACCCCAAGGGCAAATTAAATGTTGAATGTTTTTGCCTCTTTCTTTAAAACGGTATTTTGAAGGTCTTTCTATTTTTGTAGTCTGAGTCCTGTACTATCTGTTTCCTTTGAG
GmaAffx.92132.1.S1_s_at	CF807857	At1g72370	5e-94	Protein Synthesis			TCGCAGAGGGAGACGGACATCCAGATGATGCTCGCCGCCGACGTTCACCTCGGCACCAAAAACTGCGACTTTCAGATGGAACGCTACGTCTTCAAGCGCCGCACCGATGGTATTTACATAATTAACCTTGGAAAGACATGGGAGAAGCTTCAGCTTGCTGCTAGGATTATAGTCGCCATTGAGAACCCACAGGATATCATCGTTCAGTCCGCCAGGCCTTATGGCCAGAGGGCAGTTCTAAAGTTTGCTCAATACACTGGAGCTCATGCAATTGCAGGAAGGCACACTCCCGGAACATTCACTAATCAGATGCAGCAATCCTACAATGAGCCTCGTCTTCTGATTCTAACTGATCCAAGAACAGATCATCAGCCTATCAAGGAAGGTGCTCTTGGAAAT…
GmaAffx.92246.1.S1_at	CF807971	At2g19730	1e-13	Protein Synthesis			AGAGGAATAGACAGGGCGTGAGAGTCGCTGGTAGGAAGTGAA
GmaAffx.92327.1.S1_s_at	CF808052	At2g39460	3e-61	Protein Synthesis			AAAAGGGCTGATCCCAAAGCTCAGGCCTTGAAGACAGCTAAGGCTGTCAAATCAAGTGGTCAAGTGTTTAGGAAGAAAGCTAAAAAGATCAGGACATCGGTTACATTTCACAGGCCAAGGACCTTGAAGAAGGAAAGGAACCCTAAGTACCCTCGCATTAGTGCTCCACCCAGAAACAAGTTGGACCATTATCAGATACTTAAATTTCCTCTAACTACTGAGTCTGCTATGAAGAAAATTGAGGATAACAACACGCTGGTTTTTATTGTTGACCTTCGTGCAAACAAGAAAAAGATTAAGGATGCTGTGAAGAAGATGTATGACATTCAGGCAAAGAAAGTCAATACATTAATCAGGCCGGATGGGACAAAGAAAGCCTATGTTAGGTTGACTCCAGAT…
GmaAffx.93102.1.S1_s_at	CF808827	At3g04400	5e-73	Protein Synthesis			ATTGCAAGTGCAGCCAATGCTATCGTTTGAGTGGGAATTCTTGTTAAATGAGTTTTATGTTTAAGCTTGTAGGACTGAAATTTGTCTCAGGTTTTTTTCAAGCTTGAAATTGAATTACAAGTGATACAGTTTTTTTTATCCTTCGTAACTTGTTATCAGCCAGAAG
GmaAffx.93249.1.S1_s_at	CF807720	At3g04840	1e-114	Protein Synthesis			TGAAGCCCATGTGGATGTGAAGACAACTGATAACTACACATTGAGGATGTTTTGCATTGGATTTACCAAGAGAAGAGCTAACCAAGTGAAGAGAACCTGCTATGCACAATCAAGCCAGATTAGACAGATTCGTAGGAAGATGAGGGAGATCATGACCAACCAGGCAACATCCTGTGATTTGAAGGAGTTGGTCCGCAAGTTTATTCCTGAGATTATTGGAAAAGAGATTGAGAAGGCGACATCTAGTATTTACCCTCTGCAGAATGTGTTTGTTCGTAAAGTCAAGATCCTG
GmaAffx.93562.1.S1_at	CF809287	At4g34555	3e-30	Protein Synthesis			GAAGGTGAATAACCAGGTGCTGTTCGATCAGGCTACCTA
GmaAffx.89533.1.S1_at	CK606509	At4g09800	8e-25	Protein Synthesis			GTATTCTCAGGTGGTGTCAAATGCACTGGATATGAAGTTGAGGGATGATTTGGAGCGCTTGAAGAAAATCAGAAATCACCGTGGTTTGAGGCACTACTGGGGTCTTCGTGTTCGTGGTCAGCACACTAAGACTACTGGTCGCAGGGGTAAAACTGTTGGTGTCTCTAAGAAGCGTTAAGCTGTGTTATATGTTTGCTTTGAGAAATAGATATTTGTTAGGGAAGCAAATTTTGAATTATGTTGGACAAGTTTCCATAGAACATAAATTTTATTGGTTAAGTGCTGTGATGCTTTCAATTTTTTTAA
GmaAffx.89631.1.A1_at	CK606099	At3g14600	3e-80	Protein Synthesis			AATTTATATATATGGCCGTCAATCCAGATCTTATTAATT
GmaAffx.89631.1.A1_x_at	CK606099	At3g14600	3e-80	Protein Synthesis			GGCAATGTACAATGAGGCGGCTTCTCGCCACAGGGTCAGGAGCCCATGCATCCAAATTATCAAGACTGCAACCATCCCAGTTAAGCTTTGCAAGAGGGAGAGCACCAAGCAATTCCACAACTCCAAAATCAAGTTCCCATTGGTCTTCCAGAAAGTTAGACCACCTACCAGGAAGCTGAAGACCACATACAAGACCAAAAAGCCCAATTTGTTTATGTAATGTGGTTGATGAATGTATCAGAAATACTTAAGNNNNNNNNNNNNNNNNNNNNNNNNNNNNNNNACTCGTTGGTTTTTTACTTCCTGATTTTTGTTTGAGGTTTTTTTATTGGGTTTATCTTTATGTTTCTGTTGGATATTATCTTGATCATTATGATAATTGAGTAGTAGAATTGAACA…
GmaAffx.89935.1.A1_at	CF805660	At2g47610	5e-77	Protein Synthesis			AGCACAGCTCGTTGTGATTGCTCACGATGTGGACCCAATTGAATTGGTTGTCTGGCTTCCTGCTTTGTGCAGGAAGATGGAAATTCCGTACTGTATTGTGAAGGGAAAGGCCCGCTTGGGAACGGTTGTCCACAAGAAAACTGCATCCGTTTTGTGTTTGACCACTGTTAAGAATGAAGATAAATTGGAGTTCAGCAGAGTTTTGGAGGCTATCAAGGCTAACTTCAACGACAAATATGACGAGTACAGAAAGAAGTGGGGTGGTGGGATCATGGGATCCAAATCCCAAGCGAAAACCAGAGCAAAGGAGAAGCTTCTTGCCAAGGAAGCTGCTCAGAGGATGACTTAGGAGGAGTTTCTTATATTTTGNTGTTTTGCGAATGCTATTTAGTCTGTGTT…
GmaAffx.90040.1.S1_x_at	CF805765	At3g04400	7e-71	Protein Synthesis			GAGGATCGGCGGGAAACAAGTTCCGCATGTCGCTGGGTCTGCCGGTGGCGGCGACGGTGAACTGCGCCGACAACACCGGCGCGAAGAACCTCTACATCATATCAGTGAAGGGGATCAAGGGNAGGCTGAACCGGTTGCCGTCAGCTTGCGTNGGNGACATGGTTATGGCCACCGTCAAGAAGGGAAAGCCNGATCTCCGTAANAAGGTGCTNCCCGCCGTCATCGTCCGNCAGCGCAAGCCNTGGCGCCGAAAGGACGGTGTTTACATGTACTTCGAAGATAATGCTGGNGTNATNGTGAATCCCAAGGGTGAAATGAAAGGTTCTGCTATCACTGGTCCNATTGGGAAGGAGTGTGCTGATCTGTGGCCCAGGATTGCAAGTGCTGCNAATGCTATTG…
GmaAffx.91554.1.S1_s_at	CF807279	At1g69410	1e-64	Protein Synthesis			TGCTTGTTGCTTGTTATTTCTATTTTCTATTTAAGCAAAGATATTTTTGTAAGCCTTTTATATTGGTTTGTTCAAGACCTGGCGTATAGATTCTAGTCA
GmaAffx.91487.1.S1_at	CF807212	At5g60390	2e-78	Protein Synthesis			GGGATGTCGTTTCTTATGGTTACAATAAATGTTGGTTTCTTGCCCTTGTGTCTTCGTTTC
GmaAffx.91487.1.S1_s_at	CF807212	At5g60390	2e-78	Protein Synthesis			ATCGACGGTGGCAAGACTCCTTTTATCATTCTGTTTTAATGTGTTGTGTTTGTGAGAACCCCTGATTACATTTTTGTTAAGCGCAGCGAGTTTTAGGGCTTTGCCGTTGCGTTGTTGGTTTGCTTTT
GmaAffx.91487.1.S1_x_at	CF807212	At5g60390	2e-78	Protein Synthesis			GGGATGTCGTTTCTTATGGTTACAATAAATGTTGGTTTCTTGCCCTTGTGTCTTCGTTTCTAGGTAGCTTGTTTTTCGGACATAGTTTGAAGTCTCCACCATCATCTCGCAACTTTTGTTCCCAGAATTGGGTTCTTGATCGACGGTGGCAAGACTCCTTTTATCATTCTGTTTTAATGTGTTGTGTTTGTGAGAACCCCTGATTACATTTTTGTTAAGCGCAGCGAGTTTTAGGGCTTTGCCGTT
GmaAffx.90432.1.S1_at	CF806157	At1g36240	1e-53	Protein Synthesis			GAATATCTGATTAAGTTCTAGACTTTGGTGTAAGGT
GmaAffx.90973.1.S1_at	CF806698	At5g56680	2e-63	Protein Synthesis			GGGTTTTGATAGTTATTTCATTTCTTTATCCTCCACTTTGATGCTGGTTGTTTTCATTCGTTTACAAACTCTGCTCTGCA
GmaAffx.90578.1.A1_s_at	CF806303	At4g33865	6e-28	Protein Synthesis			AGTTGTCAACTACGGACCAATATTGTGTTCTGGCACTAGGATGTTTTGAGGATGTTATGTTTGAAGAAACTTGAGACTTTCTTTTTTCATCTAATTAATTATCAGACGTAATTTGTGGTACTAAGAATACTTTTATA
GmaAffx.90664.1.S1_s_at	CF809097	At5g60390	1e-65	Protein Synthesis			TGATCATCAACGTGGTTTCAAAAAAACTTGTTCCTTTACAGTAGTTTATCTTTGCAGAGTCTTAGGTGTTTGTTTTACCAGTTATATTTTGAAGTGTCCGCCGATTTCATGTAGCCGTAGCCTTCAAAACTGGGTTCTTGATCGGCGGTAACATTTTCGTTGCTGTTTGTTTTTGATGAGTACTGTTTTTTGTTTTGATGGTAAAAGTCTGAGATTTTCAAATTCACAAGCAGCCATAGGGT
Gma.8992.1.S1_at	CD405460	At3g16080	9e-46	Protein Synthesis			CCGCTGCACGCACGCGGAAATATAACTGGAGCGTCAAGGCAATTCGCAGAAAGACCACCGGAACTGGCAGGATGAGATACTTGCGTAACGTGCCTCGCCGTTTCAAGAGTGGCTTCAGAGAAGGTACCGAAGCTGCACCAAGGAAGAAGGGAGCAGCTACCACTGCATAGACCTTTCAAAGATCGTTCTCGTTGGGTACGGATTTACAGGAATAGATTGCTTTTTGTGCTTTTGGCAAGTATTTTGGAACACTTATTTTTAGAGTCTCATTGCTTCTTTATCCCCCATTTAATTTGTAGTTGCTTTATATTCAACAAGACCATAAGACTTATTGATTGTTCACTTGGTTTTATG
GmaAffx.13056.1.S1_at	BE823571	At5g37475	1e-08	Protein Synthesis			GCATCTTCGGTAACTGCCATTGCAAACGAGAAGATAAAGGCAGAAAAAGAAGCCAATGCTGGTAAAAAGAAGATAGGTGGGAAGAAAAAGCAACTTAATGTCGATAAACCTGATGAGGATTTTGTTCCTGCTGATCGATATGATGCTCTGGATGATTATGATTTCATGTGAAATTTTTTGGTTCGGTTCCATTCAGATTCAGTTACGGGATTCAAGTGTTTCAACATTGAAAGTTGGGACAAGACCCTTCGGCATACCCTTGTCAAATGCTAATGAGTGCTGTCCCGTATTTTGTCTAATAAGAGTGTTCGTCAGTGTCTTGTNNTCTCATTGTCAATTNTGTCACCACCAATATATGCTCGGAAGTTAGTTTATATGATTTATAGAACAATTTGAAGA…
GmaAffx.12985.1.S1_s_at	BI785205	At4g16720	5e-31	Protein Synthesis			TAAGTTTTTTACTATGTGCCGGGATTGTTTTTATT
GmaAffx.1301.123.A1_at	CD391812	At3g59540	7e-30	Protein Synthesis			CAAGACCTGTAGAGGTGCTGAGTGCGGCAGCGTGCGTTTGTTTATCTTTTTGTTGCCTCATGCTCTAGATTTTGTGGCTTGCTTTTATATTTTGGTAATTGTTATGAGGATATGCTTGTTTTTTATTTGCTATGAAAATGCGAAAGT
Gma.9829.2.S1_at	AI748648	At2g40010	1e-136	Protein Synthesis			ACTTTCATTAGCTATCTCATACCCAACACTTGCTGCTGCACCACACATGTTTGTCAATGCCTACAAGAATGTTCTTGCTGTTGCGGTTGAGACAGATTATTCTTTCCCTGAGGCAGACAAGGTCAAGGAGTATCTGAAGGATCCAAGTAAATTTGCTGTCGCTGCTGTTGCTGCTCCTGCTGCTGAGTCTGGTGCTCCTGCTGCAGCCAAGGAAGAGGAAAAGAAGGAAGAACCAGCTGAAGAATCTGATGATGACATGGGTTTCAGTCTGTTTGACTAATTTATGTAATGCTTTTGTTGAGTTTATTTGGTTAG
Gma.9829.2.S1_x_at	AI748648	At2g40010	1e-136	Protein Synthesis			ACTTTCATTAGCTATCTCATACCCAACACTTGCTGCTGCACCACACATGTTTGTCAATGCCTACAAGAATGTTCTTGCTGTTGCGGTTGAGACAGATTATTCTTTCCCTGAGGCAGACAAGGTCAAGGAGTATCTGAAGGATCCAAGTAAATTTGCTGTCGCTGCTGTTGCTGCTCCTGCTGCTGAGTCTGGTGCTCCTGCTGCAGCCAAGGAAGAGGAAAAGAAGGAAGAACCAGCTGAAGAATCTGATGATGACATGGGTTTCAGTCTGTTTGACTAATTTATGTAATGCTTTTGTTGAGTTTATTTGGTTAG
GmaAffx.27092.1.S1_s_at	BE583478	At5g45775	3e-59	Protein Synthesis			TCGTTCCTTTGGGATTAGAAGAAATGAGAAGATTGCATGCTATGTCACTGTCAGAGGTGAC
GmaAffx.51433.1.S1_s_at	BE022395	At4g15000	1e-07	Protein Synthesis			GACCGGCAAGAATAGGTGGTTCTTTACCAAACTCAGATTCTGATCTCGCAATCGTGAGGTTTTATTATTAGGGCTTTTGGAATGTTGCCTTTTTTTTAATATTGTATTCTTGTTTTGCAAATCTTATCAAAACTATTATTCTGCTCTTA
GmaAffx.45638.1.S1_s_at	BE658001	At4g31985	9e-08	Protein Synthesis			GCTCGGATTTTAAGGTCCATGTCAACCTCCGACTCGAGATTTTTATATTGTTTTNNNNNNNNNNGAATGTTACTAGCAATGTGTAAACTGGAAAGGTTTTAGCTTTTGGTCATGTGGTCACACAGAGGGATCATTGTTGAGCGTTTCCATATCTCTATTTTGTTTTTGTACTTTTTTTGGATATTAATCTGAGACTGAGATGGTAGTTTTTAT
GmaAffx.81459.1.S1_at	BF596892	At3g49910	2e-11	Protein Synthesis			GCTGTGATTGCATTTTTGTTTCAATAATTTCTAATTCTCTATCTTGTCGCAGCTACGGATTGTCTTTTAT
GmaAffx.8505.1.A1_s_at	BF425961	At3g05590	5e-33	Protein Synthesis			CAAGAATGCTCGGGAAGCTGTGAAACACTTTGGTCCTGCTCCTGGTGTGCCACACAGCCATACCAAGCCCTATGTACGAGCAAAGGGAAGAAAGTTCGAGAGGGCTAGAGGAGGGAGGAACAGCAGAGGATTTAGAGTTTAAGAAATATAATATAACTTTGTTCTATTTTTTTTTTACAATTGTTCACTTCTGAAATTAAACTGTTTGCTCTAGGCGTCGGTG
GmaAffx.88394.1.S1_at	CA819148	At5g28060	3e-05	Protein Synthesis			ATAAGTTTTGAGACACCCTGTTACTCCTAAGGTTAAATTGGATTTGGTGCTTTGTAATAGATATTTTTATCTTATGCTAGATTTATAGAATGAGATGTCTTGGCGCAAGTGNTGATCCTTGTTTTAATTTATGTTCGATCGCTTATAACTTCAGATGNTGAGTACATTGAACAATTGAGAACTCGTGTTTTATTTTCCTTG
Gma.6450.1.S1_at	CD401012	At1g18070	3e-56	Protein Synthesis			GAGGTTCACTCTTCGCACTGAAGGAAAAACTGTTGCTGTGGGAAAAGTCACTGGTCTGTGAATTTGTAACAATTTTGACTTGAGGACGGGAATTCCTGCNCAAATNTANTGGAGTGGCAGCTNNGAGGCATAATTGACAGCATCAAGTTTACCATATATTCATTTCGGTATTTATTTTGCTTTTACTTGGGGTAGTATTCAGTGAAGAGTTATTTGTTGCCGCTGGTGTCCATGATGTACTTGTATACGGCCTTACAAGGCNTGGNTGCTTCAGTATTTTGCGGTTGGCTGCTTCCAACCGTGCTACTCNTGAGATATAATTTGAAAATNGATGGTTTTAAATCAATCTGCCTTATTAGCTGTGGAATCTGATGACTATTTTAGCCCAACAGCGG
Gma.6308.1.S1_at	BG359665	At3g13920	1e-150	Protein Synthesis			AGGGTGTTGCTATCAATTTTGTGACTGGGGATGATGAAAGGATGCTGTTTGACATCCAAAAGTTTTATAATGTGCAGATTGAGGAGCTGCCAGCCAATGTAGCCGATCTCATTTGATTTGGTCTTCCCATCATTGGTATGCTTTTTGTTATGGAGGCCGCTGTCATTATTTTATTTTTCACGGCCCAGGGCCTTTCTCTAGCAAGACTTGAACTTAACCCCAAACCGGTGATTTGAATTTGCCATTCTTCTCTCTAATTTTGGGTCTAGCAGAATGCGTTGTTGCAATTTTGTTGCTTGCTTGTTTGTTTGTCTTATTACTAAAGATTGTAGATTGCTGCTTTCTCTTT
Gma.6575.1.S1_at	CD401299	At4g18100	2e-55	Protein Synthesis			GCTCAGACAAGAAAACCCGCCATTATCTACCAAATGGTTTCAAGAAATTTGTCGTGCACAATGTGAAAGACCTGGAACTTCTCATGATGCATAACAGGACATANTGTGCTGAGATTGCTCACAATGTATCCACAAGGAAGAGGAAAGACATAGTTGAGAGAGCTGCTCAGCTTGATGTTGTCTTGACGAACAAGACNGCCAGACTACGTAGCCAGGAGGATGAGTAGATCCAATANATGGGAGAGTTATTTANTGTTTTGTAGTGAGCTTCTGTTGACACCCTTGATGGTAGATTTTGATTTTTTGTTATTTNNNNNCCAAAACTTTGTTGCATGCCNTACAATTTTATATGTTGCTTATTGTCTATTTGCTGTTNNCTAAAGTTTTCTACCCCNATNT…
Gma.6553.1.S1_at	CD406256	At1g74270	2e-57	Protein Synthesis			AAGTCCAACCAGTACCCAAACACATCCCTGATCCAAATTGAGGGAGTGAACACCAAAGAAGAAGTAGGATGGTATGCTGGCAAGAAAATGGCCTATATCTACAAGGCTAAGGTGAAAAAGGATGGAAGCCATTACCGCTGCATATGGGGCAAGGTTACGAGGCCTCACGGCAACAGTGGTGTTGTCCGTGCAAAATTCAAGTCAAACCTTCCACCCAGATCGATGGGAGCTCGAGTAAGAGTATTCATGTATCCAAGTAATATATGAGATTCAGGTGATAAGACGCTCAGAATTCGCAGCTTAATAGTAGGCACAAGGATTTTTGTTTCAGCTTTGATAATTTTGTTGTCTGTCAACTTTTTGAGAATTTTCCTTACGGTTTAGACGTTCATTTGAACG…
Gma.6163.1.S1_at	CB063421	At4g29410	1e-57	Protein Synthesis			TCTCTACAACCTCAACACTTTCAAGTACTCCGGTTTGGCGAACAAGAAAACTGTCACTGTTCAACCTGCGGGTAAAGACCAGTCTGTGTTGCTGGCAACAACCAAGACAAAGAAGCAAAACAAGCCTGCTGCTTTGCTTCACAAATCTGTCATGAAAAAGGAGTTCCGGAGGATGGCAAAGGCAGTGCAAAATCAGGTAGCAGATAACTACTACAGGCCTGATCTCAAAAAGGCAGCTCTGGCAAGGTTGAGCGCTGTCAATAGGAGCCTCAGAGTTGCTAAGTCTGGTGTGAAGAAGAGGAACAGACAGGCTGTGAAGGTCCCTAGCAGGAAGTGAAATTAGAAGAGTTAAATTGCATTCTACATTACTACCATCCT
Gma.584.2.S1_x_at	BU547551	At1g67430	9e-73	Protein Synthesis			TTGCAATCAGGAAGTTGCCCTTGGTTAAAGCTAAAAGGTACTTGGAAGATGTTCTTGCGCACAAGCAGGCCATTCCGTTCAGACGTTTCTGTCGTGGTGTTGGAAGGACAGCTCAAGCAAAGAATAGACACTCTAATGGCCAAGGAAGGTGGCCTGTCAAGTCAGCAAAATTCATCCTTGATTTGCTCAAAAATGCTGAGAGCAATGCTGAAGTGAAAGGTTTGGATGTTGATGCGCTTTACATTTCTCATATCCAAGTCAATCAAGCACAGAAGCAAAGACGCCGAACATACCGAGC
Gma.5841.1.S1_at	CD401465	At1g23290	2e-59	Protein Synthesis			CTGGCCACGGTCGAATCGGAAAGCACAGGAAGCACCCTGGAGGACGCGGTAACGCCGGAGGCATGCACCACCACAGGATCCTCTTCGACAAATACCACCCTGGGTTCTTCGGCAAGGTAGGAATGCGCTATTTTCACAAGCTTCGCAACAAATTCTACTCTCCGATCCTCAACATCGACAAGCTGTGGTCCCTGGTCCCGCAAGAAGTGAAGGACAAGGCCTCCAAGGAGAACAAGGCGCCGCTCATCGACGTCACGCAGTTCGGGTACTTTAAGGTTCTCGGAAAGGGCGTTTTGCCGCAGAACCAGCCCGTTGTGGTCAAGGCCAAGCTTATTTCCAAGATCGCTGAGAAGAAGATCAAAGAGGCTGGCGGCGCCGTTGTTCTCACCGCTTGAATTT…
Gma.5843.1.S1_at	CD416491	At3g12390	2e-66	Protein Synthesis			TAGCCATTTTTCTTTGATCTTAATTTTTGTTCTCCTTGAATTTGAAATACTGGTTTGTCAATTATCTGTGTAATTGTCGGCATGGAAGGAAAAGACTGTAGACTTCATTTGCANCNAATGCATGTTCANTGCCAAGTATGTCAGTCATAATTAGC
Gma.5843.1.S1_x_at	CD416491	At3g12390	2e-66	Protein Synthesis			TGGTGTTTCAAGACCTAAAGCCGTTAAAGCTCTGAAGGCAGCCGGTGGTGACATTGTTGCGGCCATTATGGAGCTAACTAATTAATGGTCCGGTTTGGTTGAATTTTAGAATGTGTAGCCATTTTTCTTTGATCTTAATTTTTGTTCTCCTTGAATTTGAAATACTGGTTTGTCAATTATCTGTGTAATTGTCGGCATGGAAGGAAAAGACTGTAGACTTCATTTGCANCNAATGCATGTTCANTGCCAAGTATGTCAGTCATAATTAGC
Gma.5843.2.S1_x_at	BE824014	At3g12390	5e-67	Protein Synthesis			TTCAAGAGTCCAACGTCTGACACGTACATTATATTTGGGGAAGCCAAGATTGAAGACTTGAGCTCACAGCTACAAACTCAGGCAGCAGAGCAATTCNNNNCNNNNAATTTGAGCAATGTTGGATCAAAGCCTGAATCTTCTGCTGTTGCTCAAGATGATGAGGAAGTGGATGAGGCTGGTGTAGATCCCAAGGACATAGAGTTGGTGATGACTCAAGCTGGCGTGTCAAGACCTAAAGCCGTTAAAGCTCTCAAGGCGGCCGGTGGTGACATTGTTGCTGCCATTATGGAGTTAACTAATTAATTGTCTGGTTTGTCTGAATTTTAGAATGTGTAGCTATTTTTCTTTGTTGATTGAAATTTTTGTTTTCCTTGAATTTGAAATACTGGTTTCAGTGGT…
Gma.6740.1.S1_a_at	CD397282	At4g14320	1e-54	Protein Synthesis			GATAGCATTGCTGCCCAAGGAAAACGCCGTTACGATCGCAAACAATCTGGTTATGGCGGACAAACTAAGCCCGTCTTCCACAAGAAGGCTAAGACCACCAAGAAGATTGTTCTGAGGTTGCAATGCCAGGGTTGCAAGCATGTCTCCCAACACGCTATTAAGAGGTGCAA
Gma.6740.1.S1_x_at	CD397282	At4g14320	1e-54	Protein Synthesis			AACAAAGAAGACATACTGCAAGAGTAAGGAGTGCAGGAAGCACACCCTGCACAAGGTTACCCAATACAAGAAGGGTAAAGATAGCATTGCTGCCCAAGGAAAACGCCGTTACGATCGCAAACAATCTGGTTATGGCGGACAAACTAAGCCCGTCTTCCACAAGAAGGCTAAGACCACCAAGAAGATTGTTCTGAGGTTGCAATGCCAGGGTTGCAAGCATGTCTCCCAACACGCTATTAAGAGGTGCAAGCACTTTGAGATTGGTGGTGACAAGAAGGGCAAGGGAACATCTCTGTTCTAGTTTGCGAATTAGGATTCGCAGCTTTTTATGTTT
Gma.7067.2.S1_at	BQ610144	At5g20290	2e-88	Protein Synthesis			AGATGTACGCTTTTTGACTGTTGGTCGATCTCCTTTAGGGTGATGCCATAGGACATCCTTAGTGTGAACGTTTTATTAGCGTACATCTTGAATTTGAGACAGGGATGCATGAGTATTCTACTTGTCATTACCATATCATCAGATAAGAGAACAAAACTGCGCTGATTTTGAAATTACTG
Gma.4710.1.S1_a_at	AW317168	At2g09990	3e-69	Protein Synthesis			GCCAGAGCATCGCCAAGGCGCTCGTCGCGTTCTACCAGAAGTATGTCGACGAACAGAGTAAGAAGGAGATCAAGGACATTCTCGTGAGGTACGATCGCACCTTGCTCGTTGCGGATCCCAGGCGCTGCGAGCCCAAGAAGTTTGGTGGGCGTGGCGCACGTGCGAGGTTCCAGAAGTCTTACCG
Gma.4710.1.S1_s_at	AW317168	At2g09990	3e-69	Protein Synthesis			TTTGGCTTTTGGTTTCGGTTCATGTTTTATGCTGTGGAAAAAATGAATACTTTCGTTGCTGGTGGTTTTTGGTAGTTTTATAATTTTGGTCGCTTTTTTATAATTGTTGGATTTGATGTTGTT
Gma.4710.2.S1_a_at	CD402482	At2g09990	6e-70	Protein Synthesis			GCCAGAGCATCGCCAAGGCGCTCGTCGCGTTCTACCAGAAGTACGTTGATGAACAGAGTAAGAAGGAGATCAAGGACATTCTGGTGAGGTACGATCGTACCTTGCTCGTCGCGGATCCCAGGCGCTGCGAGCCCAAGAAGTTTGGTGGGCGTGGCGCACGTGCGAGGTTCCAGAAGTCTTACCG
Gma.4710.2.S1_at	CD402482	At2g09990	6e-70	Protein Synthesis			GTTCTACCAGAAGTACGTTGATGAACAGAGTAAGAAGGAGATCAAGGACATTCTGGTGAGGTACGATCGTACCTTGCTCGTCGCGGATCCCAGGCGCTGCGAGCCCAAGAAGTTTGGTGGGCGTGGCGCACGTGCGAGGTTCCAGAAGTCTTACCGTTGAAGGAGAATGGTGGTGTTTTTGTGTTTTTTTGTTTTTGGTTCGGTTCATGTTTTATGCTGTGGAAAAAATGAAAACTTTTGTTGGTGGTTTTGGTAGTTTTATAATTTTGATCGTTTTTTTTATAATGGTTGGATTATGGATTCTTGTTTTGATTCAACTTTTTCTGTTTAGGTAATATGAAGGTACGGATTATT
Gma.4710.2.S1_x_at	CD402482	At2g09990	6e-70	Protein Synthesis			GAGCCCATCCTCCTGTTGGGAAAGAGCCGCTTCGCCGGCGTCGACATGCGCATCCGCGTCAAGGGCGGCGGCCACACCTCCCAGATCTACGCCATTCGCCAGAGCATCGCCAAGGCGCTCGTCGCGTTCTACCAGAAGTACGTTGATGAACAGAGTAAGAAGGAGATCAAGGACATTCTGGTGAGGTACGATCGTACCTTGCTCGTCGCGGATCCCAGGCGCTGCGAGCCCAAGAAGTTTGGTGGGCGTGGCGCACGTGCGAGGTTCCAGAAGTCTTACCGTTGAAGGAGAATGGTGGTGTTTTTGTGTTTTTTTGTTTTTGGTTCGGTTCATGTTTTATGCTGTGGAAAAAATGAAAACTTTTGTTGGTGGTTTTGGTAGTTTTATAATTTTGATCGT…
Gma.4473.1.S1_at	CA934965	At2g47610	9e-17	Protein Synthesis			TGGAATCATGGGTTCGAAGTCCCAAGCCAAGACCAGGGCCAAGGAGAAGCTCCTTGCCAAGGAAGCAGCCCAAAGAATGAACTAGATTAAGTTGCTTTTACATTATTAAGGTTGTCATTTTTCTATATCTTATATGGGAGCATATACAAGTTAAAATGTGAGGTTTTACTTCATTTTGGTAGCTGGTAATCCACAAGGACCGATTTTGATCGTTGATTTTTCGAAGTTATTTTAAACTTAGCATTGGAATGTTTTCCTTTTTCGGTTCANGGAGTNNNTANAATCAGTATTGAGATTTTGCAGCAATTCAGTAGTGTGGTGTTGCTTATTGATCGTGGACCCTTTTCAACATGTTGGGAGCGTATACGTCTAAAAATAAGGAAAAAGGGGGATTATAAT…
Gma.5413.1.S1_s_at	BE190254	At5g56670	1e-28	Protein Synthesis			TCATCACAATGGGTAAGGTTCACGGATCTCTCGCACGTGCGGGNAAAGTGAGAGGACAAACTCCCAAAGTGGCGAAGCAAGACAAGAAGAANAAGCCACGCGGACGNGCTCACAAGAGAATGCAATACAACCGCCGATTCGTCACCGCCGTGGTGGGATTCGGAAAGAAGCGTGGACCAAA
Gma.5161.1.S1_at	BI971155	At5g20290	4e-79	Protein Synthesis			GAACAATTCGGAGGTGGTCGCCTTTTGGCTTGTATCTCATCTCGACCTGGCCAATGTGGTCGTGCTGATGGATATATATTAGAGGGNAAAGAGCTGGAATTTTACATGAAGAAGCTTCAGAAGAAGAAGGGCAAGGGTGCTGCTTAAGATATTGTCTATCTTCCTACTCGTTGTATCAGAATTTCNTGAAGCTCTTAACTATCCACCAACAGATTATCAGTTTTGCTANGAACTCTATTTTCTTTGGGAGGGNNNNGTTTATGGGTGTAAACATGNCCNAGAACTTTTATTTGTTTACTTATAGTGAGTCCTGTTTAAATTGATTATTTCCACCANNANAATTNNNNANTGCATTGACTTTCTTTCCTTACATTTCTTTAGAGCAGACAGAGTACTTGG…
Gma.5354.1.S1_at	CD401290	At4g29410	5e-46	Protein Synthesis			CCTCAATTCGTTCAAGTACTCTGGTTTGGCAAAC
Gma.5354.1.S1_x_at	CD401290	At4g29410	5e-46	Protein Synthesis			CCTCAATTCGTTCAAGTACTCTGGTTTGGCAAACAAGAAAACTGTTACNGTNCAGCCTGAGGGNAAAGATCAGGCTGTGTTGTTGGCTACAACNAAGACAAAGAAGCAAAACAAGCCNGCTGCATTGCTNCACAAATCTGTGATGAAGAAGGAGTTCAGGAGGATGGCAAANGCTGTTGAAAANCAGGTGGCNNAAAATTACTACNNGNCCNGATCTCAAGAAGGCNGCCCTTGCAAGGTTGAGTGCTGTTCACAGAAGCCTCAAAGTTGCCAAGTCTGG
Gma.5660.1.S1_s_at	BI968688	At3g13920	0	Protein Synthesis			AGTTGGTTTCTGAGGTAAGTGTTATGTAATGTTTCTTGTTCCTTTTTGCCCCTTTTGTTNNNTNNNNNCTCTTNNACCTTGTTNGACCTTCTTAATAGGTGTAGTNATTTAATTTACATATNNNTCGTCTGAATGTCCCAAGTGATGAGTACTTGCAATGTGGA
Gma.5723.1.S1_s_at	BU082303	At5g39850	2e-83	Protein Synthesis			ACGCCAGAGTCCTCATCAGGCAGAGGCACATCAGGGTTGGGAGACAGGTGGTGAACATCCCATCNTTCATGGTTAGGGTTGATTCGCAGAAGCACATTGACTTCTCACTGACCAGTCCNCTTGGTGGTGGTCGTCCAGGACGNGTGAAGNGAAAGAACCAAAGGGCTGCTGCTAAGAAGGCTGCTGGTGGAGANGGAGATGAGGAGGANGAAGATTAAATTATTAATGGCTNCTGATATTTANNGNCCTTGNGNTNGTTNNNNTTTTTATNNNNNCTGTGTNGGTAGACATTTTAGATTTTTGAAATGGTCTGACTT
Gma.5586.1.S1_s_at	CD391234	At5g59850	1e-64	Protein Synthesis			CGTGGTTGAATTGAACGGTAGACTGAACAAGTGTGGGGTTATTAGTCCCCGTTTTGATGTNGGCGTCAAAGAGATTGAAGGTTGGACTGCTAGGCTTCTCCCCTCAAGACAGTTTGGGTATATTGTATTGACTACCTCTGCNGGCATCATGGATCANGAAGANGCTAGGAGNAAAAATGTTGGTGGTAAGGTANTGGGNTTCTTCTACTAGNNTTTAATTTNNATNAAGNNGATGTCAGGNATTTCAATTTTGAGATTCATNGNTTGTAATGGAGGATAATGCTAGCCCCCTAGTAGTATCAATCATAGCAGGACCTGTTTTGTGAT
Gma.5601.1.S1_at	AI965923	At5g20160	2e-51	Protein Synthesis			GACACTGAGCCTCTTGAGATTCTTCTCCATCTTCCTCTCCTNGCTGAGGATAAGAATGTTCCCTATGTATTCGTNCCATCAAANCAAGCNCTTGGGCGAGCATGTGGAGTCACACGGCCAGTGATTGCATGTTCTGTAACAACTAATGAAGGAAGTCAACTNAAATCCCAAATTCAGCAACTAAAGGATGCTATTGAGAAGCTGTTAATTTGAAANTTTGATATTCGGTATGACGGGCTTCTTGAGNNNNNNNNNNNNNNNNNNNNNAGGCTTTGACTGGACCAGATGTTGTATTCAACAGACAAAGGTGTTTTATGTGTAAACCTACATTTATATTTACTTTTGCCGCGAAGGATT
Gma.5626.1.S1_at	CD394365	At3g05560	3e-41	Protein Synthesis			GGAACAGAGTTTACATATTATTCATTGCTGTTTCAGTCTTTAAAA
Gma.5678.1.S1_a_at	CD405283	At1g69410	9e-79	Protein Synthesis			GGATGGGTTTGCTGAGGGTAAGGACCTTGTTGTGTCAGTTATGTCTGCAATG
Gma.5678.1.S1_at	CD405283	At1g69410	9e-79	Protein Synthesis			AAGGATGACCTGAAGTTACCTACAGATGAGAGTCTGCTTACTCAGATAAAGGATGGGTTTGCTGAGGGTAAGGACCTTGTTGTGTCAGTTATGTCTGCAATGGGTGAGGAGCAGATTTGTGCACTGAAGGATATTGGGCCAAAGAACTAGCCTCAATTGCTGGTAGTTTGCTGTTTTCATTTATGCAAAAGTTATATATTTTTGTATGATCTTGTTAAACCCCGGAGTTATGGAGACTCTAAGTCAGACTAGTTTTATCAACTGT
Gma.5678.1.S1_x_at	CD405283	At1g69410	9e-79	Protein Synthesis			AAGGATGACCTGAAGTTACCTACAGATGAGAGTCTGCTTACTCAGATAAAGGATGGGTTTGCTGAGGGTAAGGACCTTGTTGTGTCAGTTATGTCTGCAATGGGTGAGGAGCAGATTTGTGCACTGAAGGATATTGGGCCAAAGAACTAGCCTCAATTGCTGGTAGTTTGCTGTTTTCATTTATGCAAAAGTTATATATTTTTGTATGATCTTGTTAAACCCCGGAGTTATGGAGACTCTAAGTCAGACTAGTTTTATCAACTGT
Gma.5678.2.S1_a_at	CD417564	At1g69410	8e-79	Protein Synthesis			GGATGGGTTTGCTGAGGGTAAGGACCTTGTTGTGTCAGTTATGTCTGCAATG
Gma.5683.1.S1_at	CD410890	At2g04520	1e-45	Protein Synthesis			GGGAACGGCCGCTGCGAGGCGATGTGCATCGACGGCACCAAGCGCCTCTGCCACATCCGCGGCAAGATGCACAAGAAGGTCTGGATCGCCGCCGGCGACATCATCCTCGTCGGCCTCCGCGACTACCAGGACGACAAGGCCGACGTCATCCTCAAGTACATGCCCGACGAGGCCAGGCTCCTCAAGGCCTACGGCGAGCTTCCTGACAGCACCAGGCTCAACGAGGGCATCGGCGCTGGCCTTGATGAGGAGGAGGATGGGGCCGGAAATGATTATATCGAGTTCGAGGATGAGGATATTGATAAGATTTGAAGGAAGAGAAAAAAAAGTTAGGGTTTTGGTTTTGGTTTGTGTTGCTGATGCCTCTTTTTTTGTTTTTGTTTTTGTTTGAGATTATAT…
Gma.5683.1.S1_s_at	CD410890	At2g04520	1e-45	Protein Synthesis			ACAGCACCAGGCTCAACGAGGGCATCGGCGCTGGCCTTGATGAGGAGGAGGATGGGGCCGGAAATGATTATATCGAGTTCGAGGATGAGGATATTGATAAGATTTGAAGGAAGAGAAAAAAAAGTTAGGGTTTTGGTTTTGGTTTGTGTTGCTGATGCCTCTTTTTTTGTTTTTGTTTTTGTTTGAGATTATATATGAAATTGTTATGATTTGGTGATGGATTCACTTTATGGTATGTGATGGTGTTGCCTCTGTGT
Gma.414.1.S1_at	BE658080	At1g26880	9e-45	Protein Synthesis			CCCCTGGTGGGAAGCTCGTTTATCAGACNACCAAGAAGAGGGCCAGCGGNCCCAAGTGCCCCGTCACTGGCAAGAGGATTCAGGGGATTCCACACTTGAGGCCTGCAGAGTACAAGAGNTCAAGGTTACCCAGAAACCGTAGGACTGTCAACCGTGCATATGGNGGAGTTTTNTCTGGAAGTGCNGTCAGGGAGAGGATTATCCGAGCNTTCTTAGTTGAAGAGCAAAAGATTGTGAAGAAGGTCTTGAAGATCCAGAAGGCAAAGGAAAAGCANGCCTCAAAGGCTTGAATTTGAANAACACAATGAGACANNTCTTTTTGGAGGACTNTTAGGTTTGAGTGGTTATAGTAAATCACAAATTTTATTAGAGTTGTTCTCATGTTAATTGTGCTTTTAT…
Gma.414.1.S1_x_at	BE658080	At1g26880	9e-45	Protein Synthesis			CCCCTGGTGGGAAGCTCGTTTATCAGACNACCAAGAAGAGGGCCAGCGGNCCCAAGTGCCCCGTCACTGGCAAGAGGATTCAGGGGATTCCACACTTGAGGCCTGCAGAGTACAAGAGNTCAAGGTTACCCAGAAACCGTAGGACTGTCAACCGTGCATATGGNGGAGTTTTNTCTGGAAGTGCNGTCAGGGAGAGGATTATCCGAGCNTTCTTAGTTGAAGAGCAAAAGATTGTGAAGAAGGTCTTGAAGATCCAGAAGGCAAAGGAAAAGCANGCCTCAAAGGCTTGAATTTGAANAACACAATGAGACANNTCTTTTTGGAGGACTNTTAGGTTTGAGTGGTTATAGTAAATCACAAATTTTATTAGAGTTGTTCTCATGTTAATTGTGCTTTTAT…
Gma.4288.1.S1_at	BE659478	At1g11480	9e-16	Protein Synthesis			CACGGTACAGTAGAGCAGCTTCGGCGGTTGAACTTGCACAAGCATTCTCCAGATCTGTATCAGATCCAAAAGTGAATGATAGGTTTTCAGGTCAAAGGGGTCTGAACACNNNCNANAGCAGCAGGACACAAGTTCCATTTTCACGGCTTNTTGGTCCTACATCAAGGCCTCAGATCAATGGTTATTAAAATATTTGGTGGATAATTGGACTCACTCAAGACCAATTTCTATGAGATAGCATTGGATTCATGCAATGTGGAATTGCAGAGCACTTCATGTAGTGGCTGTGGTTTTAGTTATTTTCTCCNCATTCACAACAATTGAGTGAGAAATTAATGATTTCTCAAGTTACATAGCCTTGGTTGTGACAATACCTTCTTACAATTACCATGCTTTATT…
Gma.4208.2.S1_a_at	CD401340	At4g09800	1e-47	Protein Synthesis			GTTGTGTCTAATGCTCTTGATATGAAGCTCAGGGATGA
Gma.4208.2.S1_at	CD401340	At4g09800	1e-47	Protein Synthesis			AGTTGGATAGTGTGATGACTGTGGTGGCGAACCCTAGGC
Gma.4208.2.S1_x_at	CD401340	At4g09800	1e-47	Protein Synthesis			TGTGATGACTGTGGTGGCGAACCCTAGGCANTTCAAGATCCCNGNANTGGTTTTTGAACAGNAAGAAGGATTACAAGGATGGNAANTACTCTCANGTTGTGTCTAATGCTCTTGATATGAAGCTCAGGGATGANCTTNNNNNNNGACTNAAGAANATCAGAAACCACCGTGGTTTGAGGCANTNACTGGGGCCTTCGTGTCCGTGGTCAGCACACCAAGACTACTGGCCGNAGGGGAAAGACTGTTGGNGTCTCTAAGAAGCGTTAAGCTATTATGTTTNGGCTTGGANATTAGATTTTGTTNAGNAGGNANGTTTGAAGTACACTANNCATGTTTTGCATCATACCAACTTTGT
Gma.3910.1.S1_at	CD392610	At4g31985	4e-23	Protein Synthesis			TAGCTTTGGTCATGTGGTTACACAGAATGATCACTGTAGAGCGTTTCCATAACCCTATTTTATTATTCTATTTTTTTGGCTATTAATGTGAAACTGTGATGGTAGTTTTTATTTNACTGCCTTTGATTNNTANNNTGCTTCCTTTTTCTTTCTATTTTTAAAACGCAATTTCATTGGAATGTTGAATGGTGTTGTTCTCCACTGCTTGATAGTTAGTTGGTTGCAGAGGTGACATGTGAAAAA
Gma.3982.1.S1_at	BQ453310	At5g02450	3e-45	Protein Synthesis			AGAGGTTGCCGGCTTTGCACCTTATGAAAAGCGAATAACTGAGTTGCTCAAGGTTGGAAAAGATAAGAGGGCACTGAAAGTTGCCAAGAGAAAGCTTGGAACCCATAAGCGCGCAAAGAAGAAGAGAGAGGAGATGTCCAATGTTCTCCGGAAGATGAGGGCTGGTGGAGCTGGAGACAAGAAGAAATAAGTCTTGTTTACTTTTTCTAGTTTCACTAGACTGTTTCGATGTACGAGTTGTCTTATTTTTGTTTTAGTTCAAGATTTTGCTTTGAGAAATATGTTTTACCTAATCGAGACATGATTTACTG
Gma.3820.1.S1_a_at	AW156783	At2g18110	1e-61	Protein Synthesis			CTGTTGATACTCTTATTGAGGAACATCTCACAGTTGAGCCCATCAATGAATATGTCCAGAGTTGTGACATTGTGGCCTTCAATAAAATATAAACTACAATCGGTGGGATTTGGAGATCATGGCAACTGGGAGAATTGCAAGTTTTAGAAACTATGTTCTAGGGGGAACTACCCTGAATTGAGAATTTTTGTCTTT
Gma.3820.2.S1_at	BE803335	At1g30230	1e-72	Protein Synthesis			TATAAACTACAATTGTGGGACTTGGAGATCATGGCAACGGGAGGAATTGCAAGTTTTAAAAACTATGATATTGGGAAACTACCCTGAATTGAGAATTTTTGTCTTTAGAAACCCGCTTGTTATTTGTTTTTATATATCAGTCTTTGTGATGTCATCGGCTATTTGGATAATAATCATCTTTCCTTTGTTGTGTCATCCGTATTATTTGNATAGTAATCATTTTACCTTTGANNNNNNNNNNNNNNNNNNNCNNNNNNNNTTNNNTCNCNNNTGNNGANTTNNGAAATGTTGAGAACTCACGTTACTCTAGTTTTAAATGTTACTTGCTG
Gma.311.1.S1_at	CD413539	At4g27090	1e-48	Protein Synthesis			AGTACATTTTGGTTGCTATATGAATTTTTATGTATCAATGAGAGACATCCTAGAAATGCTTATTTTGAAATCATTCGTGTTATTGGTTGATGCTAGTTCTCCCAATATCATTGTTAGAATATCAGGTCCGTTTTGGCTTTTGCTTGCAGATGTTTGAATATTGGTTTTTG
Gma.2687.1.S1_at	BE824139	At5g03850	8e-19	Protein Synthesis			AAAACCGACACATCATGAGGAACGTGAAGGGACCCGTGAGAGAAGGAGACATTCTCACCCTACTTGAGTCTGAAAGAGAAGCAAGAAGGTTGCGCTAGAGGATCTCTTCATGGTTTGGCTCAGGACTTAAACAAAACATCGTTGTTTTTGTTGTAGTTAAAGGATGTCAAATGTTAATTGTCATGGACCTGAATTATGCACCTACTATGTTTGACATTATGCCATTATGTTTGTGGCTGAGTTATGACTAAATTTATGCTTTGACTATATGAAGTGTTTTCTATTCTATGGGCTA
Gma.2238.1.S1_at	BM893125	At3g55620	1e-126	Protein Synthesis			AGATGATTGCAGATGTTCTTGGAGTAGAAGTTTTCAGGCAGACCATTGCTGGNAATATTCTTGTTGGTAGTTACTGTGCCTTCTCCAANAGAGGTGGCTTGGTTCACCCTCATACTTCCATAGAAGACTTGGATGAACTTTCTACACTTCTTCAGGTTCCTTTGGTGGCTGGGACCGTGAACCGGGGTAGTGAAGTAATAGCNGCTGGAATGACAGTTAATGATTGGACNGCATTTTGTGGTTCCGACACCACNGCAACNGAGCTATCTGTNATNGAGAGTGTTTTCAAGCTGAGAGAAGCNCAGCCTAGNGCAATTGTGGATGAGATGAGGAAATCNCTCATTGATACCTATGTCTGAACTGTGGTAGTAA
Gma.16104.1.S1_at	CD392889	At3g16080	2e-45	Protein Synthesis			TAAGACTTATTGATTATTCAGTCGGCTATGTT
Gma.16104.1.S1_s_at	CD392889	At3g16080	2e-45	Protein Synthesis			GCTGCAGCATTAGGGTTTTTCATCTGCTTCAATGGGGAAGGGAACAGGGAGTTTTGGTAAGAGAAGGAACAAGACTCACACTCTCTGTGTGAGGTGTGGCCGCCGCAGCTTCCATCTCCAGAAGAGTCGTTGCGCCGCTTGTGCTTTCCCCGCCGCACGCACTAGGAAATATAACTGGAGCGTCAAGGCAATCCGCAGAAAGACCACCGGAACTGGCAGGATGAGGTACTTGCGTAACGTGCCTCGCCGATTCAAGAGTGGCTTCAGAGAAGGTACCGAAGCTGCACCTAGGAAGAAGGGAGCAGCTACCACTGCATAAACCTGTCAAAGATCGTTGTTTGCTGGGTACGGACTTACAAGAATAGATTGCTTTTTTGTGCTTATGGCAAGTATTTTGGA…
Gma.16125.1.S1_at	BQ298270	At3g61110	4e-37	Protein Synthesis			CTTTCTTACAATGGTTCTACAGAACGATATTGATTTGCTGAATCCTCCAGCTGAGTTGGAGAAGAGAAAGCACAAGCTCAAGCGTCTTGTGCAGTCACCAAACTCTTTCTTCATGGATGTTAAGTGCCAGGGCTGCTTCAACATAACAACTGTGTTTAGCCACTCTCAGACTGTTGTGGTTTGCGGAAACTGCCAGACTGTGTTGTGCCAACCAACAGGCGGACGGGCAAGGTTAACCGAAGGGTGCTCTTTTAGGAAGAAGGGAGATTGAATGGTTTGTTAACCAGACTTTTCTTTGTCAATGATTGAAAATTTTCGGTTGTTAGGTTTTTGAAATGGAATCCATTTCCGTTATGGTATATTAATTTTGTTAAATTGTAAGACAATATCTCTCTCAGC…
Gma.16034.1.S1_a_at	CD403617	At5g20180	7e-19	Protein Synthesis			GGAGGGTGGGATTGGCCTCTATTCTGTCTATGAAGTAGCAAAAATAATTAGTAACCTCGAACATTACGAGTAATAAGTGCGAAGAGATTGATAATCAACGGTTATGGATTNAGGCCTCCATCTTGCTCTTGCCTTTCTTTGTATTGGTTGATGAAGATTTTTTCAAACTTTTTTTTTGTTTTGTGTGATATTTGATTTACATCACTCGGGGATTTTGTTTCTCCGTTAAAAATATGGTCAACAGATTGTAACCTCGTAGTA
Gma.16192.1.S1_at	BG507769	At2g47610	2e-77	Protein Synthesis			ACCCAATTGAGCTGGTGGTCTGGCTTCCAGCATTGTGCAGGAAGATGGAAATTCCATACTGCATTGTCAAGGGCAAAGCACGCTTGGGAACGATTGTCCACAAGAAAACTGCTTCAGTTTTGTGCTTGACAACTGTCAAGAATGAAGACAAGANGNNGTTCAGTAGAATCCTAGAAGCTATTAAGGCCAACTTCAATGACAAGTATGATGAATACAGAAAGAAGTGGGGTGGTGGAATCATGGGTTCCAAATCTCAAGCCAAGACCAGGGCCAAGGAGAAGCTCCTTGCCAAGGAANNNGNCNNNAGNATGAACTAGATTCACTTGTTTTTACATTATTGAGGTTGCCATTTTTCTATATTTTATATGGGAGCATTTACAAGTTAAAATGTGAGGTTTT…
Gma.16243.1.S1_s_at	CD415189	At3g53020	1e-49	Protein Synthesis			TTACTCCAGGTCCATTGTCGGTGCCACTTTGGAAGTTATCCAGAAAAAGAGAGCTGAGAAGCCAGAAGTTCGAGATGCAAATAGGGAAGCTGCCCTTCGTGAAATTAAGGAGAGGAACAAGAAAACAAAGGATGAGAAGAAGGCTAAGAAAGCAGAGTTTGCCAAGTCCCAAAAATC
Gma.16348.1.S1_at	BI786109	At1g26910	1e-115	Protein Synthesis			ACAGGAGGCTCTTCGTCGTGCTAAGTTTAAGTTCCCTGGTCGTCAGAAGATCATAGTTAGCCGGAAATGGGGTTTCACCAAGTTTAGCCGTGCTGATTATCTCAAGTACAAGTCAGAGAGCAGGATTGTGCCTGATGGTGTGAATGCTAAGCTTCTTGGGTGCCATGGACCACTGGCAAACCGTCAACCAGGACAAGCTTTTCTATCTAGTGCTACTGCTACTGCTTAGATGGCTTGTTACATGGAAACAGTGGGCTTTGACCACAATAGTTGTGTTTGACTCAATTTGAGTTTCTTAATTGCTCTACTCGTAGTATTAAACTATTAAACTATGTTAAGTTTATCTAATCTTTTATGAACCATCTTAAATGGAATGAATGTCATATTTTGTTGGTATTT…
Gma.16404.1.S1_at	CD417934	At4g15000	4e-54	Protein Synthesis			AAAGCCGTCATCGTCCTTCAGGGACGCTACGCCGGCAAAAAAGCCGTGATAGTGCGAACCTTCGATGAAGGCACGCGCGAGCGCCCCTACGGGCACTGCTTGGTGGCAGGGATAAAGAAGTACCCTGCGAAGGTGATCAAGAAGGATTCGGCCAAGAAGACGGCCAAGAAGTCGCGTGTGAAGGCGTTCGTGAAGCTCGTGAACTACCAGCACCTCATGCCCACGCGCTACACGCTCGATGTCGATTTGAAGGACGCGGTTACCCCCGACGTGCTCCAAGCCAAGGATAAGAAGGTTACTGCTCTCAAGGAGACCAAGAAGCGCCTCGAGGAGAGGTTCAAGACTGGGAAGAATCGGTGGTTCTTCACCAAGCTCAGGTTCTGANCATAATATTATGCA…
Gma.17229.1.A1_at	AW309443	AtCg01240	8e-14	Protein Synthesis			AAGTTCTGAATTAGTGGATGCTGCCAAAGGTAGTGGTGATGCCATATGTAAAAAGGAAGAGACTTATAGAATGGTAGAGGTAAATAGAGCTTTTGCACATTTTTGTTAATCCATGAACAGGATCTATATAGACACATAGACCCATGAATCCATACATTTCGATTGAAAAAGAATTGAAATTGATGAATATATCTCTCGAAACAAACGAAAAGGAAACGAAAAACAAAAACATAAATCATGGATCAATTAAGCCCTCTCGGGACTTGCTTAAGAATGAGAAAGAGGAATCTTATGTAAATACCACAG
Gma.16767.1.S1_at	CD415303	At1g14610	0	Protein Synthesis			AGTCCACTGTTAAGTCTCTCAGGTCACTGGCAAAAGAAAGTCGTGACAGGCGACCAGCTTTTGTTCTCTGCCGAGCACCGGTGGTTACTGAGATTATTAACAGCCACCAACTAGAGATTGTAACATTAGCTAATCTATCCTCTTTGACAGTAATCACTGAAAGAGATGCTGTTCCATCTGGATATGCTGATGCTGTTGTAAATGAAAACCTTTCTGTTTATTTAGAGCTTCAAGGAACTAATTCTGCAGAAGCAGAGGGGAAGATCAAGAAGATAGATGAGCTGAAAAAGCAAATAGAAAGACTAGAGAAGATTATGAATGCTAAAGGTTATGAAGAAAAGGTTTTGCCAAATATTCGAGAAAAGAACCAGGAGAAGCTAGATTCCCTTAAGTTATTGC…
Gma.17954.1.S1_at	CA935124	At3g61110	2e-25	Protein Synthesis			TGTCTTCCTTCTCTAGGGTTTTTAGCTCNCNCCAANTTCTTCGCNCAACATGGTTCTTCAAAATGATATTGATTTGCTAAATCCNCCGGNTGAGCTTGAGAAGAGGAAACACAAGCTCAAGCGTCTTGTTCAGTCACCAAACTCTTTCTTCATGGATGTTAAGTGCCAGGGTTGCTTCAACATAACCACTGTCTTTAGCCACTCTCAGACTGTTGTTGTATGCGGAAANTGCCAGACNGTCTTGTGNCANCCNACNGGNGGCCGGGCAAGGCTAACCGAGGGATGCTCCTTTAGGAAGAAGGGAGACTGAGTGGNNTGCCATCTTTTTTTGTNTGTGATTGGAGAGTTTCAGTAATGCCTTCTTTTGT
Gma.17980.1.S1_at	BM526726	At5g60390	5e-78	Protein Synthesis			AAATGGTTATGCTCCTGTGCTTGACTGCCACACTTCTCACATTGCCGTCAAGTTTGCCGAACTTGTGACCAAGATTGACAGGCGATCTGGTAAGGAGATTGAGAAGGAGCCCAAATTCTTGAAAAATGGAGATGCAGGTTATGTTAAGATGATTCCCACCAAGCCTATGGTGGNCGAAACTTTCTCCGAGTATCCTCCTCTTGGTCGTTTTGCCGTGAGGGACATGCGACAAACTGTGGCTGTTGGAGTCATCAAGAGTGTGGAGAAGAAGGACCCAACTGGAGCCAAGGTCACCAAGGCTGCACAGAAGAAGAAGTGAATACATTTTTGTGTTTCTTCAAGTACATGCGATCATAGTTACATTTATAGTTACANNNNNCNNTNGNNNCNNANNANTNN…
Gma.17984.1.S1_at	BQ454011	AtCg00770	3e-55	Protein Synthesis			AATACCATTTACTAACATAACAGAAAACATTGTAAAAATACTTTTACGCGAGGGTTTTGTTGAAAACGTCAGAAAACATAGAGAAAACGACAAATATTTTTTAGTTTTAACTCTACGGTATAGAAGAAATAGAAAAGGATCATATAAAAGTTTTTTAAATTTAAAACGGATCAGTACACCCGGTCTACGAATATATTCTAATTATCAACGAATCCCTCGAATTTTAGGGGGCATGGGGATTGTAATTCTTTCAACTTCTAGAGGTATAATGACAGATCNAGAGGCTCNATTAGAAAGAATTGNCNGAGAAGTTTTATGTTATATATNGTAATCTTTCTAACACCCNAATTATATNAGAAACTTCGATCCATTTTTGGTAAAAAAAAAAANGAAAGAGAA…
Gma.18010.1.S1_s_at	CD398452	At2g09990	2e-70	Protein Synthesis			TTTAAGCTATTCATCATAAGTTGTTAAAGTACTTTCTCTGTTTTATTGGTTCTGCGCTGAGTTAAGATCAATCGAATTCTGAATACAGTT
Gma.17823.1.S1_s_at	CD408785	At3g06680	9e-27	Protein Synthesis			GGATTTGATTTGCTATTCAAGTCCCATATGTTTTGTG
Gma.17555.2.S1_at	BE820725	At4g18100	2e-25	Protein Synthesis			TTAACATGGTCTTTTACCCCTCACTTGCCGTCTCAAATTCGGTTTTAAGTGTTGTAGTTCCTCAATTTTTTCAGATCTCAATTTTTAGTCCGTCGAAACTTTTTTTAACAAATTTTATTCTTATGTTAATTCTCCATCAGCATTTTTGGGAATTAAAAATTAGAATGTGAAAAAGTTGAAGCATAGCGATAGTTTTTTTTTTTTGGATACTATAAACATGCGATAGTTGCTTGAAGAATACCAGAAATCATTGTATAGGTTAACGCCAACCATGTTGTGGAACGC
Gma.17644.1.S1_s_at	BU090070	At3g44590	3e-14	Protein Synthesis			ATATGAAGGTCGTCGCTGCATACTTGCTCGCAGTGTTGGGAGGGAATCCATCTCCTTCTGCCGATGATATCAAAAACATCCTCGGCGCAGTTGGAGCTGAGGCTGAGCATGAGTTGATTGAGTTGCTCTTGACCGAAGTCAAGGGCAAAGACTTCAATGAGCTACTTGCTAGTGGAAGTGAAAAGATTTCTGCAGTGGCTGGTGGTGGTGCAGCGGTTGCTGTTGCTGCTGCACCAGCGGGAGGTGCTGGTGGCGGTGCTGCACCTGCTGCCGAAGCAAAGGAAGAAAAGAAAGTAGAAGAGAAGGAGGAATCTGATGATGATATGGGTTTCAGTTTGTTCGACTAAAAGGTCTGAAGTGTTTTTTGTGTTTTTACATTTGGAGTTCTATTTAGTATTT…
Gma.17859.1.S1_at	CD395921	At3g02560	4e-88	Protein Synthesis			GAAGGATGTTGTCTTGATTGCCACAAGGAGGATCGTGCGACCGCCAAAGAAAGGCTCTGCTGTTCAGCGACCCCGAACCCGCACTTTGACCGCTGTCCATGATGCCATGCTGGAGGATGTTGTGTATCCTGCAGAGATTGTTGGCAAACGGGCCAGATATAGAATTGATGGCTCAAAAATAATGAAGGTTTTCTTGGACCCCAAGGAGCGCAACAACACTGAGTACAAGCTGGAGACCTTTTCTGGAGTTTACAGGAAGCTTACTGGAAAAGATGTAGTATTTGAGTATCCAATCTCAGAAGCCTGAGATGCTGCTGCTTGGTTTAATGGAGTATTGTTTTTTTGGCAGATTTTTCTGTTAGAATTACATATTTATGTTAAACAATAACCAAAATTTTG…
Gma.1845.1.S1_at	BG157436	At5g20920	1e-93	Protein Synthesis			AAAACGATGCATCGGCAGCCAGACCATGTCATGGCNTTCTTGCTTGCTGAATTGGGTACAAGTGGCTCCCTTGATGGACAGCAGAGATTGGTTGTAAAGGGAAGGTTTGCACCAAAGAACTTTGAAGGAATTCTGCGACGATATGTCAATGAATANGTTATTTGCCTTGGGTGCAAGAGTCCGGATACTATACTTNCAAAGGAGAATCGTCTCTTCTTTCTCCGGTGTGAGAAGTGTGGATCNAGGAAGATCAGTTGCTCCAATCAAGGCTGGTTTTGTTGCTCGTGTTGGCCGAAGGAACACAGGGACATAGTCCCTACTTTTAATAAATGTAATTGGCTGAGGATATGAACCTTTTTCTTAAAGTTTTGCATATTATATGATGTCTCTCTTACTCTN…
Gma.1859.1.A1_s_at	CD395292	At2g44860	9e-29	Protein Synthesis			GCTCCTTCTGTGCTTCAACAGGATCCATCTCTCACTTTACCAAAGATCAAAGTCAAGGTTTCCCAACAGCAATCAGAGGAGAATCATGCCATGGAAGAGTAATTCTAACAATGCTGCACTTAATTTTTGCTATTTTAATATTTGTTGCTAAATTAGTTGCCTGTAAGGTCCAGTTTACCAGTT
Gma.10688.1.S1_at	CD405473	At3g09630	0	Protein Synthesis			CCCAGGCCCAAGATGGTTAACTCTGATCTTGCCAGGATTATTAATTCTGACGAGGTTCAGTCTGTTGTGAGGCCCATTAAGAAGGATGTGAAGAAGGCCACGCTGAAGAAGAACCCTCTTAAGAACCTGAACTCTATGCTGAAGCTGAATCCTTATGCCAAGACTGCTAAGAGGATGGCTCTTCTTGCTGAAGCTCAGCGCGTTAAGGCCAAGAAGGAGAAGCTCGACAAGAAGAGGAAGACTGTCTCTAAGGAGGAAGCTTCTGCCATCAAGTCTGCTGGGAAAGCATGGTATCACACTATGGTGTCAGATTCTGATTATACAGAATTCGACAACTTTTCTAAGTGGCTGGGTGTTTCACAGTAAACTTTATGATTCATATTTTCGTATTAGATTTTT…
Gma.10737.2.S1_s_at	CD414300	At4g34670	1e-114	Protein Synthesis			AGTAGTTGGAGCTTGATCCGGCTGATAATGCATTTTTGTTTGTTTAGAATTCCTGTTGCTTTTACAAATATTTAT
Gma.10577.1.S1_at	CD416202	At1g70600	3e-63	Protein Synthesis			CTTCGGGAAGGTAGGCATGCGCTACTTCCACAAACTTCGCAACAAATTCTACAATCCGATCATCAACATCGACAAGCTGTGGTCCCTCCTCCCCCAGGAGGCCAAAGACAAGGCCACCGCCGACAAGGCACCCTTGCTCGATGTCACCCAGTTCGGTTACTTTAAGGTTTTGGGTAAAGGGGTTTTGCCTCAGAACCAGCCTCTTGTCGTCAAGGCCAAGCTTATTTCCAAGATCGCTGAGAAGAAGATCAAGGAGGCCGGTGGAGCCGTCGTTCTCACCGCTTGATTTTTTAGGGTATTTTTATTTTTAAAGGATTTTAAGATCTGTTGTTATTTTTGGTTCTTGATTTAATCTCTCTGAACTGTATTAGTTTAAATGGTTTTTTATATTCTCAGTGT…
Gma.10577.1.S1_x_at	CD416202	At1g70600	3e-63	Protein Synthesis			GTACCATCCTGGTTTCTTCGGGAAGGTAGGCATGCGCTACTTCCACAAACTTCGCAACAAATTCTACAATCCGATCATCAACATCGACAAGCTGTGGTCCCTCCTCCCCCAGGAGGCCAAAGACAAGGCCACCGCCGACAAGGCACCCTTGCTCGATGTCACCCAGTTCGGTTACTTTAAGGTTTTGGGTAAAGGGGTTTTGCCTCAGAACCAGCCTCTTGTCGTCAAGGCCAAGCTTATTTCCAAGATCGCTGAGAAGAAGATCAAGGAGGCCGGTGGAGCCGTCGTTCTCACCGCTTGATTTTTTAGGGTATTTTTATTTTTAAAGGATTTTAAGATCTGTTGTTATTTTTGGTTCTTGATTTAATCTCTCTGAACTGTATTAGTTTAAATGGTTTT…
Gma.10782.1.S1_x_at	CD410674	At1g56070	0	Protein Synthesis			CTACAGTGTTCTTAACCAGAAGCGTGGACACGTGTTCGAGGAAATGCAGAGGCCAGGTACCCCACTATACAACATCAAGGCATACCTCCCTGTCATCGAGTCCTTTGGTTTCTCGAGCACATTGAGGGCTGCAACATCAGGCCAGGCCTTCCCACAATGTGTGTTTGATCACTGGGACATGATGTCTTCTGACCCATTGGAGGCTGGATCACAAGCTGCACAGCTTGTCACTGACATTCGCAAGAGGAAGGGCTTGAAGGAACAGATGACTCCTCTCTCCGAGTTTGAAGACAAGCTTTAAATTTGTTTCATGAATTATTTTACTTTGAACTTAGTCGAATTTATTTTCTCTTGTGAACAATGCTACT
Gma.10752.1.S1_at	AW350841	At4g36130	1e-136	Protein Synthesis			TCTGGGTCAAAGAAGATTGTGCCTAGTGGGTGCAGGGCGATGATTGGGCAGGTTGCAGGTGGAGGGAGGACTGAGAAGCCTCTTCTGAAAGCTGGTAATGCTTATCACAAATTCAGAGTGAAGAGGAATTGCTGGCCTAAGGTGCGTGGTGTGGCGATGAACCCAGTTGAGCATCCTCATGGAGGAGGTAATCACCAGCATATTGGTCATGCCAGTACCGTCAGGCGTGATGCTCCTCCTGGCCAGAAGGTTGGTCTCATTGCTGCTAGGAGGACTGGTCGTCTTAGGGGGCAAGCTGCTGCTACTGCTGCTAAAGCGGATAAGACCACCTGAAGAGATTGTTAGAGTTTTTTTTTTTTTTTTNATAAGTTCTCAAATTTTGTTTCTCTGATAGTCTAT…
Gma.10761.1.S1_at	BG839456	At5g60390	0	Protein Synthesis			ACATGTGATCATCATCGTGGTTACTCCTTTATAGTAGTTTTATCCTTGCAGAGTCTTAGGTGTTTTGTTTAAGTTATATTTTTAAGTTTCTGCCGATTTCATGTAGCCGTAACTTTCAAAACTAGGTTCTTGATCGGCGGTGGTCAATTTTCATTGCTGTTTGTTTTTGATGAGTACTGTTTTTTGTTTTGATGGTAAGAAGAGTCTGA
Gma.10761.1.S1_x_at	BG839456	At5g60390	0	Protein Synthesis			CATGTGATCATCATCGTGGTTACTCCTTTATAGTAGTTTTATCCTTGCAGAGTCTTAGGTGTTTTGTTTAAGTTATATTTTTAAGTTTCTGCCGATTTCATGTAGCCGTAACTTTCAAAACTAGGTTCTTGATCGGCGGTGGTCAATTTTCATTGCTGTTTGTTTTTGATGAGTACTGTTTTTTGTTTTGATGGTAAGAAGAGTCTGAGATATTTCGAATTTCACAAGCAGCTATAGGGTTTTAGTCCATTTCCTTTGCTGCTGAGGGATGTTTTAAGTTGC
Gma.10826.2.S1_at	BI970873	At3g02560	1e-77	Protein Synthesis			AAAGGATTCCGGAAGATTCATGTCAGGCTTGTGAGAGAACTTGAGAAAAAGTTTAGTGGAAANGATGTAATCNTGATTGCCACCNGGAGGATANTNAGGCCACCAAAGAAAGGTTCTGCTGTTCAGCGNCCCCGCACCNGAACACTCACTGCTGTACANGAGGCAATGCTGGAAGATATTGTATTGCCTGCTGAGATTGTTGGAAAGCGTGTTAGGTATAAAATTGATGGTTCCAAGATTATGAAGGTCTTTTTGGACCCCAAGGAGCGAAACAANACCGAGTACAANTTGGAGACTTTTGCTGCAGTATACAGGAAACTTTCNGGCAAAGATNTNGTGTTTGAGTATCCTACNACCGAGGCTTAGGTTCTATTTGTTAGCTTTG
Gma.10892.4.S1_at	CD403449	At5g45775	1e-83	Protein Synthesis			AATGTTTCTCATTTCAGTTTTGTGATGAAGCACATGTATTAACNATAGCCCTTTTAAACGACACTTTTATTGCAACNAAGAACATGTGAGACACTTTTAAATGCATTCTCT
Gma.10892.4.S1_s_at	CD403449	At5g45775	1e-83	Protein Synthesis			ATTTCAGGGGAGTGTTTTTATCAGTTTTGTCAACTATCTTTCTGGGATAGTATCTTAATTTTGAGGCAGGTT
Gma.10892.4.S1_x_at	CD403449	At5g45775	1e-83	Protein Synthesis			ATCCTTAACAAGTCTCAGGCGATTGTTTAGTTAGANTGAGTTCATTTCAGGGGAGTGTTTTTATCAGTTTTGTCAACTATCTTTCTGGGATAGTATCTTAATTTTGAGGCAGGTTNTGAATCAATGTTTCTCATTTCAGTTTTGTGATGAAGCACATGTATTAACNATAGCCCTTTTAAACGACACTTTTATTGCAACNAAGAACATGTGAGACACTTTTAAATGCATTCTCT
Gma.11157.2.S1_at	CD412540	At4g16720	7e-94	Protein Synthesis			GCGAGGCTCTTCTCCGCAGAATGTTCCGCTACGGACTCCTCGACGAGACTCAGAACAAGCTCGATTACGTCCTCGCCCTCACCGTCGAGAATTTCCTCGAGCGCCGCCTTCAGACGCTCGTCTTCAAATCCGGGATGGCCANNNNCNNTTCACCACGCCAGGGTTCTCATCAAGCAGAGACATATCANGGTTGGGAGGCAAGTGGTGAACATCCCATCTTTCTTGGTGAGGGTTGACTCACAGAAGCACATTGACTTCTCACTTACAAGTCCCCTTGGTGGCGGACGCCCTGGAAGAGTGAAGAGAAGAAACCAAAGGGCTGCTGCTAAGAAGGCCGCAGGTGGAGACGGAGACGAGGAAGACGAGGATTAGACTGTTCATTATGTCTTTCTCTAGTGC…
Gma.11190.1.S1_at	CD402535	At5g35530	1e-106	Protein Synthesis			ACGATCCACACCCCCAAGGAAGAGGAAGAATATGCCCGGCCTGCTGCTGTTTTGGCAACTGATATTGAGGTCCCTGTTGCTTGAAAATGTTTTATTTGTTCTTGAGTAGAAATTCATAGCACCTGAGTACCTAGTATGCAGTGTTCATTTGCTTAGACCTGGTCAGATTTTTGTAGTGTCTTATCTTTGTTGGGAAAGACTAGTTAAATTTTTTTGTAGTTTCTTAACAGTTTATGAAATTGCTACAAAGTGCCAAGTATTTTAAGCATCAATT
Gma.11190.2.S1_at	BM270192	At5g35530	1e-106	Protein Synthesis			GTCACGATCCACACTCCAAAGGAGGAAGAAGAATACAACCGGCCTCCTGCTGTNTTGGCAAATGATATTGAGGTGGTTCCCGTTGCTTGAAATGTTTTTGATTGCTTGGAATAGTAACGGGTAGTATTTGAGTTCCTAGTATGCAATCCTTGTTGGGAAAGAC
Gma.11173.1.S1_at	CD399794	At3g49910	6e-51	Protein Synthesis			GCGGGTGCTTATGAGCGCCCCTCTGTCGGCGGAGCTGCGGTCNAAGTACAACGTGAGGTCGATCCCAGTACGGAAGGAGGACGAGGTGCAGGTGNTGCGAGGAACATACAAGGGTCGCGAGGGGAAGGTGACTCAGGTCTACCGTCGAAAGTGGGTGATTCACATTGAGCGCATAACC
Gma.11173.2.S1_at	CD397537	At5g67510	4e-42	Protein Synthesis			AGGTGACGCAGGTGTACCGTCGCAAGTGGGTCATCCACATCGAGCGCATAACCCGCGAGAAGGTGAATGGCTCCACCGTCAACGTTGGGATTCACCCCTCCAAGGTGGTTGTCACAAAGCTCAAATTGGACAAGGATCGCAAGGCCATTCTCGATCGCAAGGCCAAGGGTCGTGCCGCCGCCGATAAGGAGAAGGGTACCAAGTTCGCTCCCGAAGACATCATGCAAACCGTTGATTAGTCTCTTTATCATACAANCCAATTTTATGTATGGGTTTTGGTAGCCTTTTTCTATCTCTCCATTTTGCAGGATTTTGTTTTCTTTTCTTATGTTAATCAAACTGTTTTATCCCATGAGCTTATCATTAACTATTTTAATTCGTTTTCATGCGTGAGGACAG…
Gma.11150.1.S1_at	AW317399	At5g24510	1e-14	Protein Synthesis			ACGCAGCAGCATCAGCTTCTACTCGTGTAATCTCTGCGTGGGCTACAATGGATTCCGGTGTCCAAGGTTGCATCTTAGCCACTTTAATTCTCCACGACGAGGAAATCCCAGTCACCGCTGAGAAGATCAACGCTCTGTTGAAGGCTTCTAATGTCTCCGCCGAGTCTTACTGGCCCAGCCTCTTCGCCAAGCTCGCCCAGAATAAGAACATCGAAGACCTCATTTTGAACGCCGGCGGTGGTGGGGCCGCCGTTGCAGTTGCCGCTCCCGCCGGCGGTGGTGGTGGTGCCGCTGCTGCAGCCGCACCCGCCGCCGAGGAAAAGAAGGAAGAAGTGAAGGAAGAAAGTGACGATGACATGGGTTTCGGCTTGTTTGATTAGATCTTTTTAT
Gma.11150.1.S1_x_at	AW317399	At5g24510	1e-14	Protein Synthesis			ACGCAGCAGCATCAGCTTCTACTCGTGTAATCTCTGCGTGGGCTACAATGGATTCCGGTGTCCAAGGTTGCATCTTAGCCACTTTAATTCTCCACGACGAGGAAATCCCAGTCACCGCTGAGAAGATCAACGCTCTGTTGAAGGCTTCTAATGTCTCCGCCGAGTCTTACTGGCCCAGCCTCTTCGCCAAGCTCGCCCAGAATAAGAACATCGAAGACCTCATTTTGAACGCCGGCGGTGGTGGGGCCGCCGTTGCAGTTGCCGCTCCCGCCGGCGGTGGTGGTGGTGCCGCTGCTGCAGCCGCACCCGCCGCCGAGGAAAAGAAGGAAGAAGTGAAGGAAGAAAGTGACGATGACATGGGTTTCGGCTTGTTTGATTAGATCTTTTTAT
Gma.11219.2.S1_at	AI443369	At2g32060	4e-49	Protein Synthesis			TAATATGACTTTGCCACATTCTCAATGTTGCTGTTACTTTTTTTTATCCTCTGATGCATTGCTGTGGCTCT
Gma.11290.1.S1_at	CD390917	At2g37190	4e-82	Protein Synthesis			GCTCACCGTTCAGAATCGTCAGGCGAAGGTCACGGTGGTCCCCTCCGCCGCCGCCCTCGTTATCAAGGCCCTCAAGGAGCCCGAGCGCGACCGCAAGAAGACCAAGAACATCAAGCACAACGGCAACATCTCGCTCGATGACGTCATCGAGATCGCTAGGGTTATGAGGCCGAGGTCCATGGCCAAGGACCTCAGCGGCTCCATTAAGGAGATTCTCGGAACATGCGTTTCGGTTGGTTGCAC
Gma.11290.1.S1_x_at	CD390917	At2g37190	4e-82	Protein Synthesis			GCTCACCGTTCAGAATCGTCAGGCGAAGGTCACGGTGGTCCCCTCCGCCGCCGCCCTCGTTATCAAGGCCCTCAAGGAGCCCGAGCGCGACCGCAAGAAGACCAAGAACATCAAGCACAACGGCAACATCTCGCTCGATGACGTCATCGAGATCGCTAGGGTTATGAGGCCGAGGTCCATGGCCAAGGACCTCAGCGGCTCCATTAAGGAGATTCTCGGAACATGCGTTTCGGTTGGTTGCACCGTTGATGGAAAGGATCCAAAGGACTTGCAGCAGGAGATTTCCGATGGTGATGTTGAGGTCCCTCTCGATTGAGGAAGAAGACTTTGTTTCTCTCTCTTTTTCCTTCTCTCTTATGTTTGTTTCG
Gma.11295.2.S1_x_at	BE209656	At5g56670	9e-23	Protein Synthesis			CGATCTCGTTCTGTACGTGCAGCCGCAGCAAGTGATCGAAGCGAAAAGAGAGAAATTCATCGTCGCAGTAATCATGGGTAAGGTTCATGGATCACTTGCACGTGCTGGTAAGGTTAGAGGGCAAACCCCGAAGGTGGCCAAGCA
Gma.11225.1.S1_s_at	AI443347	At1g26910	1e-110	Protein Synthesis			GCCACAGGGTACTTGTGCTAGAGTGGCTATTGGACAGGTCCTTCTTTCTGTC
Gma.11068.1.S1_at	CD411381	At5g03850	1e-17	Protein Synthesis			TTGTTCGTGTTTTGCATCAGGATGGAGTCTCAGGTGAAGCACGCACTTGTTGTCAAAGTTATGGGTCGTACTGGATCCAGAGGACAAGTGACCCAGGTTAGAGTGAAGTTTTTGGATGATCAGAACCGTCACATCATGAGGAATGTGAAAGGACCTGTGAGAGAAGGAGACATTCTCACCCTACTCGAGTCTGAAAGGGAAGCAAGAAGATTGCGCTAGATGGTCTCTTTTTTTTGGCTTGCCTCCAAATTCGAACAAAAGCAATATTTTTCTTGATATTTATGGTAGTTAGTCGGTGCTAAAGGGGTTATAGCACCCTATCTTATTGTTTTGGATCTATTTTCATTCGAATTATTGCTTGAATTTTGTATGTTTAAACTTCGAGATTGAGGTATGCTT…
Gma.11068.1.S1_x_at	CD411381	At5g03850	1e-17	Protein Synthesis			AAGCAAAACCCTAGCGGCGCCTGCTTTCTTTGTTCGTGTTTTGCATCAGGATGGAGTCTCAGGTGAAGCACGCACTTGTTGTCAAAGTTATGGGTCGTACTGGATCCAGAGGACAAGTGACCCAGGTTAGAGTGAAGTTTTTGGATGATCAGAACCGTCACATCATGAGGAATGTGAAAGGACCTGTGAGAGAAGGAGACATTCTCACCCTACTCGAGTCTGAAAGGGAAGCAAGAAGATTGCGCTAGATGGTCTCTTTTTTTTGGCTTGCCTCCAAATTCGAACAAAAGCAATATTTTTCTTGATATTTATGGTAGTTAGTCGGTGCTAAAGGGGTTATAGCACCCTATCTTATTGTTTTGGATCTATTTTCATTCGAATTATTGCTTGAATTTTGTA…
Gma.12313.1.S1_at	BE807239	At5g02610	3e-42	Protein Synthesis			TTAAGGTTTTGATGCCTGCCGCTGGGGCAGCATTCCAATTATTAGTACCAGAGTTGTTTCAATGCTTGCATTAAGTTTCCAAGGTCTATATGTTAAAAACTAGAGTTGTTTCGAGAAACTATTGTTGCTTTCGGCCTTTAACTTTATAGCGATTACCTGTTGAATGATCAATGGCCGTAACCTTTATGAGTTGTGATTTATGCACATCNCAACAGTGGATACCCAAATCGACACTCTTCATTTCTCTCGTTTTTG
Gma.1201.2.S1_at	CD408823	At3g05560	8e-41	Protein Synthesis			TCTTTACCCATTTTCCCAGTGTTAGCTTCTCTTTTGGATTGAGCTATGTTGCTTTGTTTACATTAGTTGCAATTTAACAGTTTTGTTTATTTATGAGTTGCAGTGCCATTTCTGTTGAATTTAGAATAGAGTTCACATANTATATTGTCAGCTTTTGCCTTTGATACAGTNCNATTGCATTANTAAACATTTGAACGAATTGGTAGATCANNNNNANANNNNNANNNNNNGNNNCNNGNTNNNNGTTTCTACGATGTCTGGCACTTGAAGTATGTTGATTAAAT
Gma.1207.1.S1_s_at	CD414888	At5g59850	1e-69	Protein Synthesis			CTGCTACCTTGTGACAATGGTGAGGGTTAGTGTGTTGAATGATGCTCTTAAGAGCATGTACAATGCTGAGAAACGGGGGAAGCGCCAGGTCATGATTAGGCCATCCTCAAAAGTGATTATAAAATTCCTTTTGGTGATGCAAAAGCATGGGTACATTGGAGAGTTTGAGTACGTTGATGATCACAGAGCTGGAAAAATTGTTGTTGAATTGAATGGTAGACTGAACAAATGTGGGGTTATTAGTCCGCGTTTTGATGTTGGTGTCAAAGAGATTGAAGGTTGGACTGCTAGGCTGCTCCCCTCAAGACAGTTTGGGTATATTGTGTTGACTACCTCAGCTGGCATCATGGATCATGAAGAAGCTAGGAGAAAGAATGTTGGTGGGAAAGTGCTGGGTTT…
Gma.11330.1.S1_s_at	AW350618	At3g52580	9e-55	Protein Synthesis			GCTTTAAACTTCTTGTGGTATATGTCTGGAGTTTCTTTATTTTAATTTCCATGCCAGACAGAATTGTGGCATTTTGAAATTTTGCTTAAGTAATATCAGAAC
Gma.11316.4.S1_at	CA820460	At3g16080	1e-43	Protein Synthesis			AACGTGCCCCGTAGATTTAAGAGTGGCTTCAGAGACGGTACCGAAGCTGCACCCAGGAAGAGAGGAGCTGCTGCCTCTACCTAAGCTTTGAATAATAGCAATTTTTGCTGGGTCAGTGAATTATATAGGATTTAATGTTTCTATGTTGATGCCGAGCTCTTTGGAACACGTTTCTTTCTGTCGTTTTAATTTCATTTAATATGTAGTGGCTTTGTATTTCGACGTGAGGATTGCAAGGAATTTTTGTTTTTTCAACGAGGGTTTTTGACATCCATATTCTGGCTTATCATTCTGGGCANNCCATTTGGTACTGTGGTTCAATTAGATAAATTTAGGGTAAGACTTATTTGGTATTAGTTTTTTTTATTATGGTTTANNGGGTGTTAGTTATTGTCAAGA…
Gma.15823.1.S1_s_at	CD396136	At3g59540	2e-32	Protein Synthesis			CAAGACCTGTAGAGCTGTTGAGTGTGGCAGCATGCGTTTGTTTCTCTTTTTGTTACCTGATGCTCTAGATTTTGTGGCTTGGTTTTATATGTTGGTGATTT
Gma.15851.1.S1_at	CD408814	At3g56340	1e-32	Protein Synthesis			GATGTTATGCTCTGACCAAATCCTAAGAACAAATTTGTTGCTTAATTTTGAACATATCAGTTTTGTGAAGGGGTATTTTGTTCTGATTATCTGCTCTAGTCGTTGGATAGTATCTTGCTGGTTATAATTTTGGTGGCTATTATTATGAAAGTGGAACTTGATATAAGTTTTCATT
Gma.15851.2.A1_x_at	CD392230	At3g56340	3e-33	Protein Synthesis			GGAAGCCTGTGTCTATGAACAGTACACGCTTCCGAAACTCTATGTGAAGATGCAGTACTGTGTTTCCTGTGCTATCCACTCTCATGTTGTGAGGGTTCGATCCCGCACTGACAGGAGGAAGCGTGACCCTCCACAGCGATTCATCAGGCGCAGGGATGATGCACAAAGGCCCGGTCAGCCTGGTCAAGCACCTCGTCCTGCTGGCACAGCAGCACCTGTCCGAACCTAAAAACAAATCCCAAGACAAAGCCTTGATGTTATGCTGACCAACCATATCCTAAGAACAAATTTGTTGCTGCTTTATTTTTGAACATCAGTTTTGTGGAGGGGTATTTTATTCTGATTATCTACTATAGTCGTTGGATAGTATCTTTCTGGTTATAATGGTGGCTATTTTTG…
Gma.15476.1.S1_a_at	CD415960	At3g52580	6e-59	Protein Synthesis			GCTTTAAGCTTCTTATGGTATATGACTGGAGTTGCCATATTTT
Gma.15476.1.S1_at	CD415960	At3g52580	6e-59	Protein Synthesis			CATCACTGGCGGGATGAAGGTTAAAGCTGACAGAGATGAATCATCTCCATATGCTGCTATGCTTGCTGCGCAGGATGTTGCTGCTAGATGCAAGGAACTGGGCATAACTGCTCTTCATATCAAGCTCCGTGCCACAGGTGGAAACAAGACAAAAACACCAGGTCCTGGTGCTCAATCAGCTCTTCGAGCCCTTGCTCGTTCAGGAATGAAAATTGGTCGCATAGAGGATGTGACCCCCATTCCTTCCGATAGCACACGGAGAAAGAGTGGTAGAAGGGGTAGAAGGCTTTAAGCTTCTTATGGTATATGACTGGAGTTGCCATATTTTAATTTCCATGTCAAACAAACAGATTTGTGCCATTTTGAAATTTTCTTCAATCAGAACTTCTTTTGTATTTC…
Gma.15476.1.S1_x_at	CD415960	At3g52580	6e-59	Protein Synthesis			CATCACTGGCGGGATGAAGGTTAAAGCTGACAGAGATGAATCATCTCCATATGCTGCTATGCTTGCTGCGCAGGATGTTGCTGCTAGATGCAAGGAACTGGGCATAACTGCTCTTCATATCAAGCTCCGTGCCACAGGTGGAAACAAGACAAAAACACCAGGTCCTGGTGCTCAATCAGCTCTTCGAGCCCTTGCTCGTTCAGGAATGAAAATTGGTCGCATAGAGGATGTGACCCCCATTCCTTCCGATAGCACACGGAGAAAGAGTGGTAGAAGGGGTAGAAGGCTTTAAGCTTCTTATGGTATATGACTGGAGTTGCCATATTTTAATTTCCATGTCAAACAAACAGATTTGTGCCATTTTGAAATTTTCTTCAATCAGAACTTCTTTTGTATTTC…
Gma.15452.1.S1_a_at	CD411279	At5g39740	6e-41	Protein Synthesis			ATGAACCAGAGAAATACCAGTCACACTTCAGCGAATACATCAAACGTGGGATAGAGGCTGATGGTATTGAGGCACTTTACAAGAAGGTTCATGCTGCCATCCGTGCTGATCCTACTCTCAGGAAATCTGATAAGGAGCCCCCGAAGGAGCACAAGAGGTACAACATGAAGAAGCTGACTTATGAGGAAAGGAAGGCTAAGTTGATTGCACGCGTGGCGGCTATCAACTCTGCTGCTGATAGTGATGAAGATGATGAGTGAAAGTTCATTGCAGATGC
Gma.15452.1.S1_at	CD411279	At5g39740	6e-41	Protein Synthesis			TGGTATTGAGGCACTTTACAAGAAGGTTCATGCTGCCATCCGTGCTGATCCTACTCTCAGGAAATCTGATAAGGAGCCCCCGAAGGAGCACAAGAGGTACAACATGAAGAAGCTGACTTATGAGGAAAGGAAGGCTAAGTTGATTGCACGCGTGGCGGCTATCAACTCTGCTGCTGATAGTGATGAAGATGATGAGTGAAAGTTCATTGCAGATGCTGTCCCATAGCCTGCCCAAGTAGAAACTATCTTATTTTGTGTCCATGAATCATTTTCTTTAAAATCTATTTGCCTGTGCTGTTTATTTTCTTGGTCCAAATTTTTTTCTATATATGCTTTTGCCTTCCAGAAAAAATAAATTCTAGGTCCAAAATTTGTATACTTTTTGGAATTGAGTAGGTC…
Gma.15452.2.S1_a_at	CD391486	At5g39740	1e-129	Protein Synthesis			ATGAACCAGAGAAATACCAGTCACACTTCAGTGAATACATCAAGCGTGGGATAGAAGCTGATGGTATTGAGGCACTGTATAAAAANGTTCATGCTGCCATCCGGGCTGATCCTACTCTCAAGAAATCTGATAAGCAGNCCCCNAAGGAGCACAAGAGGTACAACTTNAAGAAGCTGACNTATGAGGAGAGGAAGGCTAAGTTGATTTCACGTGTGGCNGCTCTCAACTCTGCTGCTGATAATGATGAAGATGATGAGTGAAAGTTCATTGCAGATGC
Gma.15452.2.S1_at	CD391486	At5g39740	1e-129	Protein Synthesis			TGAATACATCAAGCGTGGGATAGAAGCTGATGGTATTGAGGCACTGTATAAAAANGTTCATGCTGCCATCCGGGCTGATCCTACTCTCAAGAAATCTGATAAGCAGNCCCCNAAGGAGCACAAGAGGTACAACTTNAAGAAGCTGACNTATGAGGAGAGGAAGGCTAAGTTGATTTCACGTGTGGCNGCTCTCAACTCTGCTGCTGATAATGATGAAGATGATGAGTGAAAGTTCATTGCAGATGCCNTCTCATGGCTACACTAGTAGAAACTATCTTATTTGGTATCTACAGAATCATTTTCTTGAAAATTTATTTGCCTGCCTGTTTATTTCTAGGCCCAAAATTTGGATACTTTTTTTGGAGTTGAGTAAGCCTTAATTTTGGTCAATTTCG
Gma.15452.2.S1_x_at	CD391486	At5g39740	1e-129	Protein Synthesis			CAGAGAAATACCAGTCACACTTCAGTGAATACATCAAGCGTGGGATAGAAGCTGATGGTATTGAGGCACTGTATAAAAANGTTCATGCTGCCATCCGGGCTGATCCTACTCTCAAGAAATCTGATAAGCAGNCCCCNAAGGAGCACAAGAGGTACAACTTNAAGAAGCTGACNTATGAGGAGAGGAAGGCTAAGTTGATTTCACGTGTGGCNGCTCTCAACTCTGCTGCTGATAATGATGAAGATGATGAGTGAAAGTTCATTGCAGATGCCNTCTCATGGCTACACTAGTAGAAACTATCTTATTTGGTATCTACAGAATCATTTTCTTGAAAATTTATTTGCCTGCCTGTTTATTTCTAGGCCCAAAATTTGGATACTTTTTTTGGAGTTGAGTAAG…
Gma.1465.1.S1_at	CD416674	At5g23740	3e-66	Protein Synthesis			CATTATGTTTTTCGAATACTATTTGCCTTTTAATTT
Gma.15307.2.S1_s_at	AI960078	At5g60390	0	Protein Synthesis			CTCCACTTGGTAGGTTTGCTGTTAGGGACATGCGTCAAACTGTTGCTGTGGGAGTCATCAAGAACGTTGAGAAGAAGGATCCTACCGGAGCCAAGGTCACCAAGGCTGCCCAGAAGAAGAAGTGAATCGTGCGGGCTGGTTCATCAGGGGATGTNNNNNNNNNTGGTTACAATAAATGTTGGTTTCTTTTCTGTACTCTTGTGTCTTCTTTTCTAGGT
Gma.15018.1.S1_at	CD402878	At3g04400	2e-71	Protein Synthesis			TCATTCGTAACTTATAATCAGCTTGCTTTTTGAAGAGACGATATTAAT
Gma.15018.1.S1_s_at	CD402878	At3g04400	2e-71	Protein Synthesis			GATTGCAAGTGCAGCTAACGCCATCGTTTGAGTGNAATTTCTTGTTATGTTTAAGCTTGTAGGATTTAAGTGTGTCTCAGAT
Gma.1534.1.S1_a_at	BU579344	At3g53140	1e-112	Secondary Metabolism			GGGAAGCACAGGACTGAAGAACAGTTCAGGCAATTAGCCATTGATGCAGGCTTCCCTCGTTTCAGAGCCTTCCATGTTGACCATTTCTACACTGTCCTTGAGTTTCAGAAATGAA
Gma.15492.1.S1_s_at	AF276302.1	At3g55120	1e-49	Secondary Metabolism	Flavonoid Biosynthesis		AGAGGAGTTAGTTCACACCCTCCACTTCTACAGGGATATCATTTCAGGGCCGTTTGAAAAGCTAATTAGAGGGTCGAAGATTCTGCCATTGGCTGGCGCTGAATACTCAAAGAAGGTGATGGAAAACTGCGTGGCACACATGAAGTCTGTTGGGACTTACGGTGATGCTGAAGCCGCAGCCATTGAAAAGTTTGCTGAAGCCTTCAAGAATGTGAATTTTGCACCTGGTGCCTCTGTTTTCTACAGACAATCACCTGATGGAATCTTGGGGCTTAGTTTCTCTGAAGATGCAACAATACCAGAAAAGGAGGCTGCAGTGATAGAGAACAAGGCTGTATCAGCGGCGGTCTTGGAGACCATGATTGGTGAACATGCTGTTTCCCCTGACTTAAAACGCAG…
Gma.1291.1.S1_at	AF089851.1	At2g42490	0	Secondary Metabolism			CACAACCTTTGGGTTACTCCTTATGCNCGNGATGAAATGCATCCTGGAGGAGAGTTCCCTAATCAAAATCCACGTGTTGGAGAGGGTTTGGCTACTTGGGTTAAGCAAAATCGATCACTGGAGGAAGCTGATATAGTTCTTTGGTACGTATTTGGAGTGACACACATTCCTAGATTGGAAGACTGGCCTGTTATGCCCGTGGAACGCATTGGTTTCATGCTTATGCCGCATGGGTTTTTCAATTGCTCGCCTGCTGTTGATGTTCCACCAAACCAAAGTGATTTGGATGACAAAGAGAATGGCCTGCCAGCCAAGCCTATTCAGAATGGGCTAATTGCCAAGCTTTGAAAGGATAAAAAATGAGGAGGATCTNCCTCTCNACGTGGTTATGTTCNAATT…
Gma.1326.1.S1_at	CD397515	At4g24780	9e-14	Secondary Metabolism			AGCCTCCTCTAGCTATGCAAGAGCATCTAGCTTGAGTGCAAGGCCATCTTCATTGGTGGGGTCCATAACCACTGGTGCGGGTGCACTCAGCTGTAGGAAGGGTTCCCGCTGCTGATTATGACCCCTCCATTAATTCCAAACCAAAATTATCAAAAGGGAGGGAAGGGGAAACAGAATGACCCTATTAAATTAACTATGGTCATTTCTTTATAGTTAGGATGTATACTTTCCTATCATTTCCTTCCTGCATTCTTTTCTTTAGTTTTTTTTTTTTTTTTNACCATTGTTTTCCACTATTTGTCTTCTTTTTTTTTTCTTTAGCTTTTTTACTTTTGGGTTTCTTCTATGGTCTACTTTTGTCTGATTACAACCTCCGCTGTAAA
Gma.1110.1.S1_at	CD403938	At2g22590	6e-93	Secondary Metabolism			TGCATGAGTCACTGTGGCTCTGGCTCTGTGATTGAGAAGGTTCATTTTGGGCACGTGCTTGTGACTCTGCCTTATTTGCTTGACCAATGTCTGTTTTCGAGGGTGCTGGAGGAAAAGCAAGTGGCTGTTGAGGTTCCAAGGAGCGAGAAAGATGGGTCTTTTACTAGGGTCGATGTGGCTAAGACATTGAGATTTGCGATTGTGGATGAGGAAGGGAGTGCTCTAAGAGAGAATGCCAAGGAGATGGGCAAGGTTTTCAGTTCCGAAGAACTTCATAATAAGTATATTCAAGATTTCATTGATGCGCTTCAGAAGTATAGGATTCCTTCCGCTAGCTAAGCAGGATTCATGCTTTCCATTTTTCCCCTTCTTCATTAGCGTGCTTTTTTATCCTGTAATA
Gma.11260.1.S1_at	AI759626	At3g12290	1e-124	Secondary Metabolism			GTTTTATCCACACTTTTGTTTCTGTTTAGGTAGATGAATGTATTCTACAAAATCACAAGGATCGCTTTCGATGGATAAGTAGAACTGGTCCAATCGAAACTATGTATTTGCCCTTTCACTATCTCCGAAGAAACATTCTCGATGTGGGTACTGACCATATTTTAGATTGGATTTAGAGCATAGCTATTCCTTGGTGGTAAGAAACGCTTGTAGCCAGTGTAAGATCAGTTCTAATGT
Gma.10881.1.S1_at	U35367.1	At4g34710	0	Secondary Metabolism			TATTATTATTCCGTTTTCCGCTGTTTTTAGTTTAGTCCTGGATGCAATGCAGGATAAAGACAGGGTCAGTCAGTTATTGTTCTCTGCATTTTGTTCCCAAATGAAATGTCTATGACTTTCGTCGTCAAGTTCTAGGGTAACAAATTTTATTGTTGCCTTGCTTGTTATTATTATACTTAGAATNNAAATGTTCTCGCATGGACAAGTTCT
Gma.18101.1.S1_at	BE820013	At5g16010	2e-87	Secondary Metabolism			AGAACCACCAATCGATCTGTTGTATCCTGGCATTGTTTTGTTTGTGGTGGGCATCATTGGCAACTTCTACCACCACTACCTTCTATCCAACTTAAGGGGAAAGGGTGAAAAGGAGTACAAGATTCCAAAGGGTGGCATGTTTGAGCTTGTCATATGTCCCCACTACCTGTTTGAGATTATTGAGTTTTATGGGTTCTCCTTCATTTCGCAGACGCTATATGCATTCTCTTTCACCGTAGGCACTACTTTATACTTGCTAGGTAGGAGTTATTCAACTAGGAAATGGTATCTTTCTAAGTTTGAAGATTTCCCTGAGCATGTTAAGGCTATCATCCCATTTGTCTTCTAGAAATGTTGGAAGGAATAACTAATTTTACTTTCATTTCTCAGACGCTATAT…
Gma.1950.1.S1_at	AF202184.1	At4g39230	1e-138	Secondary Metabolism			ATTCTCTACATTAGACCACCAGCTAATACCTTGTCGTTTAATGAGCTTGTTACTCTCTGGGAGGNNNAGATTGGTAAAACTCTTGAAAGAATCTATGTTCCAGAAGAACAACTCCTGAAGCAAATTGAAGAGTCCGCACCACCCGTGAATGTGATCCTGTCAATTAACCACTCTTCTTATGTAAAGGGGGATCATACTAACTTTGAAATTGAGTCTTCTTTTGGAGTGGAAGCTTCAGCTCTATATCCTGATGTGAAATACATCACTGTGGATGAGTACCTTAATCAGTTTGTCTAAGGTGCAAAGCCTAGCTGATAAGTTTGTTTAATTGGTAAAACTTTGTTTTCTAAATAAAGAGAATCATGTAGTAAGACTGAATTGCTGCATGTGCTCCTCAAA…
Gma.17202.1.S1_at	BI972481	At2g45300	2e-31	Secondary Metabolism			AAAACAGTGAGTATATGCATGGCTTGCTTTTGTTTCTTAACATTCCCTTGTAAGAACTTGAGATAATTTGTATTGTTGGAAAGAGCTATTGATTCTGTTGTATCAAAGTAATTTAATTTCCAGTACAGACTTGGCTCTATTCCTCATATGTGGTGGTGTACATTGCATCTNTGCATTTGATCCCATTTCTATTGGGATAGGACCATACCTTTTT
Gma.2826.1.S1_x_at	CD397710	At3g55120	3e-50	Secondary Metabolism	Flavonoid Biosynthesis		GCAGTGATAGACAACAAGCCACTTTCGGAGNCAGTGCTGGAGACTATGATCGGAGAGATTCCTGTTTCCCCTGCTTTGAAAGAGAGTTTGGCTACAAGGTTTCATCAGTTCTTCAAAGAGTTAGAGGCCAATCCCAACATTGAAAACTGAGAGTTGCANCAGTTGCCAACTATCTTTAGAAGACCTTGGAAACAAGAAGAAGAACAGCAAAAATTTGAAGAGACATCTAAATAATGNAACCCCCCCCTCCCCGCAGTTATGTGTGCACTTTGGTGGATTTGTACCCCA
Gma.3112.1.S1_at	BG840011	At1g65840	0	Secondary Metabolism			TAGGCCACGCAGAAAAGCTATCTCTAGCTTCTGTTAGGCATGAAATGCTTGAAACTCTTATACCTCTTCAGATCTCGAGGATGTGATTTGTTGGTGCTCAGTAGCTTTTAGACAATGATTCTGCATAATGCAATGGCAAAATATTTGCCATTCGATATAATAAAGAAATAAATGTTCTTTAAGGATGGTGAATTGGTGACTATCGTCCAAGTAACACCATTTTCACTTATCCGCATTGGATTCGAATAGCTTTTTTTATCCTTTTTTTTAGGCCTGGCTTATTAAGGTGTATGTAGTATGTACCTTGGTCCATCTGAGACACAGTGCATGTAAGACCATCACTATTGTGTTACCCCACAATTCTGTAATGTGGGTGTGTCCTACTTGTA
Gma.3085.1.S1_at	CD402509	At2g16530	2e-29	Secondary Metabolism			AATTCCTCATGGTGATTGGTTTGAAATTGTCTCCTCTCCACATTATCTGTCTGAAATCGTTATATACGCTAGTTTTGTGGTCGCTACTGGAGGATCCAACCTAACAATCTGGCTGCTTTTTGTTTTTGTGGTGGCAAATCTGTCATTTGCAGCTGTGGAAACACATGGCTGGTATCGTCAGAAATTT
Gma.4295.1.S1_s_at	AF488307.1	At3g25570	1e-134	Secondary Metabolism			TATGCAAGCTTCGAAACTGTTGGTTATGACTTCAAAGCGGTGAATCTGAACGAAATGGTTCAGAGGGTATTGGCATGTTTCCTCCCAACTGAGTTTTCTGTTGCAGTTCATGTGGATGGTGCAAGCAAGTCGTTTGAGCAGACCTGCTTTCTGGATGTTAAGGGATACTGTCGTGAAGAGAGGAGCCACGAAGGGCTTGGAATGGGTGGTTCTGTTGTCTACCAAAAATTCGGGAAGACTAGTGACTGTGGTTCACCTAGATCAACTCTAAAGTGCTGGAATGAGGAAGATGAGGAAGAGTAGTTTCCTTAAGTGTCTTTATTATTCTGTCCTTGTGAAAATAAGTCTGGTTTTCCAGATACGTTATTGTTTTTCTTTGTTGTCTTTTTTAGCTTCTGT…
Gma.4300.1.S1_s_at	S46989.1	At5g13930	1e-157	Secondary Metabolism	Flavonoid Biosynthesis		GAGAAGCCTTTGTATGAGCTTGTTTGGACTGCACAAACAATTGCTCCAGACAGTGAAGGTGCTATTGATGGACACCTTCGTGAAGTTGGACTCACATTTCACCTCCTCAAGGATGTTCCCGGGATTGTCTCAAAGAACATTGATAAGGCACTTTTTGAGGCTTTCAACCCATTGAACATCTCTGATTACAACTCCATCTTTTGGATTGCACACCCTGGTGGGCCTGCGATTTTAGACCAAGTTGAGCAAAAGTTGGGTCTCAAACCTGAGAAGATGAAGGCCACTAGAGATGTGCTTAGTGAATATGGGAACATGTCAAGTGCTTGTGTTCTTTTCATCTTGGATGAGATGAGGAGGAAATCTGCTGAAAATGGACATAA
Gma.4300.3.S1_x_at	AI443042	At5g13930	5e-38	Secondary Metabolism	Flavonoid Biosynthesis		TAAGTTCGGCATCGAAGGCCTAGCCNNAAAGTCAAAGATTACNCNNCACTTGATCTTCTNNGCACCACCAGTGGTGTTGACATTGCCTGNNGTGCTGATTACCAACTGACCAAACAATTGGGCCTTCGCCCCTATGTGAAGAGGTATATGATGTACCAACAAGGTTGCTTTGCAGGTGGCACGGTTCTTCGTTTGGCCAAGGATTTGGCTGAGAACAACAAGGGTGCACGTGTGCTTGTTGTCTGTTCTGAGATCACTGCAGTCACATTCCGT
Gma.5634.1.S1_s_at	BE806891	At5g16010	2e-84	Secondary Metabolism			GAGTTATTTCCTCTCAGCTGTAACTATGGTCTATTCTCAACACCTAACAAAAGGGTTTCCAGAACCACCAATCAATCTGTTCTACCCTGGCATTGTGTTGTTTCTAGTTGGCATCATTGGCAACTTCTACCACCATTACCTTCTGTCCAAATTGAGGGGAAAGGGTGAAAAGGAGTACAAGATTCCAAAGGGTGGCTTTTTTGAGCTTGTGATTTGCCCCCACTACTTCTTTGAGATTACTGTGTTTTATGGGATCTTCTTCATTTCTCAGACATTATATTCATTCGCTTTCGCTGTAGGCACTACTATGTACTTGGTGGGTAGGAGTTACTCAACTAGGAAATGGTATCTTTCTAAGTTTGAAGATTTCCCTAAGCATGTTAAGGCTGTCATCCCATT…
Gma.4483.1.S1_at	CF921631	At5g16370	7e-58	Secondary Metabolism			AGTCGATATTGTACGGGCATCCGGCGGTGAACGAGGCGGCGGTGGTGGCGAGGCCGCNCNNNTATTGGGGAGAGACGCCGTGCGCGTTTGTGAGCTTGAAAAAAGGGATAAAAGAGAAAGAGAAACCCACTGAGAAGGACATAATTGAGTATTGTAGGGACAACATGCCGCATTATATGGTTCCCAAAACGGTTGTTTTCAAAGACGAGCTTCCTAAGACATCTACGGGGAAGATACAGAAGTTTGTGCTGAGACAAATCGCCAAGGAGATGGGGTCCTTCACGCAAAGTCGAATGTGAATTACTCTCCAATAGTTTATGGCATGCTTGGCATCAAGTTCCTATTGTATTATCACCTAGTAAAGTTTATGTATAATAAGAGTTTNATTAGTGGTGTATT…
Gma.4611.1.A1_at	BE440300	At4g38460	2e-73	Secondary Metabolism	GA Biosynthesis		GGGAACGGGTCTTTCCTCTCTACAGTTTTGTGGATTATGCTTTTGATAGAAGTTTCAGTGTTGATGATGCCAGTGGATAACGGGTGGTTCTTGATATTTATATATTTATAGTTCTTTGATTGATCGACTGACTACTTGATAATCGATCATTGCATTGCATANAGAACTTACACAGTTTAGAAAACGGTACTGCNNNTCTATACAATCAAATGAATCATCCTCAGCATTTAGACTTTACCGTTCTTTTTGTGTTGGATATCTTGACCATTTACAGAGATGAGGAAGTTCTGAAGCATGGACCCATAAAA
Gma.4437.1.S1_s_at	BQ628831	At5g42800	1e-125	Secondary Metabolism	Flavonoid Biosynthesis		ATAGAAGATATCTGTCTTGCTCACATATTTCTGTTTGAACAGCCAAAAGCAGAAGGGAGGTATATATGCAGTGCATGTGACGTTACTATCCATGACATTGTAAAATTAATTAACGAAAAATACCCAGAGTACAAGGTTCCCACCAAGTTTCAGANCATTCCAGATCAATTGGAGCCCGTGAGATTTTCTTCCAAGAAAATCACAGACTTGGGATTCCAATTTAAATACAGCTTAGAGGATATGTACACTGGAGCAATTGATACATGCATAGAGAAAGGGCTTCTTCCTAAACCTGCAGAAATTCCAGCGAATGGCATCGAGCATAAATAAATATAGGTTTTCATATCTTTGCCTCGGTGATGGCTATGAATGTTGCTTTTCTTGTTCAGTTTCTTTAAT…
Gma.4360.1.S1_s_at	BG236888	At1g76690	1e-176	Secondary Metabolism	JA Biosynthesis		AAACTGAATGCCCTCATAGCCTGGTGCCTATGAGAAAGGCCTTCAATGGCACTTTTATAGCCGCAGGAGGTTATGACCGCCAAGATGGGATCAACGCTGTAGCTGAAAACAGGGCTGATCTTGTTGCTTATGGCCGTTGGTTCTTGGCTAATCCAGATTTGCCAAAAAGATTTGCTCTCAATGCCCCTCTCAACAAGTATCACCGGGAGACATTCTACACTTCTGATCCGGTTCTTGGTTATACTGACTACCCCTTTCTTGATGATGAAGAATCCAATGCCGTAGCATCCTAGGGTAGAACCTCCATTTTTAATAACCTTATCTTCCCCTGCAAATTCATATTTGCAATTTGGTTGGTCGGATTTTCATTCGCGTGTTCTTTACATGCTTCTCCTGCTA…
Gma.4687.1.S1_at	AW309716	At1g30760	1e-105	Secondary Metabolism			GGATACAATTAGATCTGTTGCTTTGTTGTTGTTTTTTTTATCGATTTGATGTTGTAACCATGTTTTCAACTATGTTTATTTCTCGCTATCCTCCAATACTAGTTCTTTCTTA
Gma.5146.1.S1_at	AW309597	At4g16770	4e-87	Secondary Metabolism	GA Biosynthesis		GGGCCTTTATTGTGAACATCGGAGACTTGATGGAGAGGTGGACTAATTGTTTATACCGGTCAACAATGCACCGGGTTAAACGAACTGGAAAAGAACGCTATTCGATGGCATTCTTCTTAGACCCTCATCCAGACTGTGTGGTGGAATGCCTCAAAAGTTGTTGTAGCGAATCATGTCCTCCAAGATTCACTCCAATCCGAAGTGGAGACTACATGGATGAAATTTTAAGCAACACACCAGTCTGACAAGGATTTAAAATGCTCCATCCTTTCATTTATTTAAAGAGCTTAAACTTGTATGTGGCTGTAAACAGAAGAAGGATGCGAGACTCACCACAAGACCTTGCTTCATTTTAAGTCATTTCTTGTGCATTATGGCTGTAGCCATGTAAAACGGACA…
Gma.7535.1.S1_a_at	BQ613041	At3g29590	7e-31	Secondary Metabolism			AGATAAGATACTTGAGTTCACTACTCCAAAAAATAAGA
Gma.6636.1.S1_a_at	BM523459	At4g35160	4e-18	Secondary Metabolism			GATTGCAATTGGGTCTTTGAGGGACTGGAATCCAT
GmaAffx.5705.1.S1_at	BM121509	At4g35160	4e-73	Secondary Metabolism			TTTTGCACGATTGGTCAGACGAAGAGTGCATCCAAATCTTAAAGAAGTGTAGGGAAGCCATATCAAATTCAAAGGAAAACGGAAGGGTTATTATTGTGGAGGCGGTGATTGAAGGAGAAGGAGAAGGNAGAAGGAGGNAAGCATGACGGATTGAAGGATGTGGGATTGATGCTGGACATGGTAATGATGGCGCACACTAACTTCGGCAAAGNGCNCACACTCNAAAGAGTGGGAATATGTCATCAAAATGGCAGGATTTAGCTCANACACTGTCAAACCCATTCATGCTGTGCAGTCCGTCATTATGGCTTTNTACTAAAATATATCCACCAAAAATTACCCTTGCAAGTTTGCCACTAAAATGCATTAAATAATTTAATAAAAAATAAAACATATTGT…
GmaAffx.42116.1.S1_at	BQ081473	At5g13930	3e-23	Secondary Metabolism	Flavonoid Biosynthesis		GTCACTGTCTAATCATATATATTGAGCAAGAACACAGATCCTTCTTTTCTTCTTATGTATTATTGCTTTTTTAGTTTGAAAAATGTATTCTTTCTCTTTTGCTTTCTCACATTCTTCTTTTTTGTATACCAGT
GmaAffx.42116.1.S1_x_at	BQ081473	At5g13930	3e-23	Secondary Metabolism	Flavonoid Biosynthesis		TTGTACTCCGCAGTGTCACTGTCTAATCATATATATTGAGCAAGAACACAGATCCTTCTTTTCTTCTTATGTATTATTGCTTTTTTAGTTTGAAAAATGTATTCTTTCTCTTTTGCTTTCTCACATTCTTCTTTTTTGTATACCAGT
Gma.9633.1.S1_at	AY170374.1	At4g24520	0	Secondary Metabolism			GCATGGCCCGAGATGTTCATCGGACTCTTCATACCATTGTCCAGCAGCAGGAAAATGTGGACTCTTCAAAGGCAGAGGCTATAGTTAAAAAACTCCAGATGGATGGACGTTATCTTAGAGATGTCTGGTAAATTTTCTGATTATTCATCTTTCTGGGTTGTGCCTTCCTTGCTATTTGGTCTGTTAAGTTCAAGATTGGTTGAAGGATATTTGATACTCTTCTATCACGGAGTTTTGGGACACCAATGATGGAGGCTGAAATTTCCTTGAGAAAGCAAATCGTTTTCGTGGACATTTGTGTGGTTTTCTTATATTTTTCGCCGCCTTGATATTCTCTCTTGTCATGATATTTGAACTAGGATTATTTTTAGGGGGACTGATAGATAGCTTCATAGATGA…
Gma.910.1.A1_at	BE659128	At1g24360	4e-08	Secondary Metabolism	Enterochelin Biosynthesis		AATCCTTTTACCTTGCAACATGAGCTTTTGCACTTTTAAACTACTTCTGTACGGTGATAGTTTGTTCTTTGCTGAGTTTTGTTTAAGCTAGTTTTACCCTGTGATTTATCGTAGAATATTAGTTGAAATGCAATTCAGTCACTTTTGGCACTAGCTCTGAATTGCTTACTGATGAAATGCAATGTGTCCAGCATCTTGTACCATTTTGGTTTTTATGGTCATGTNAGCAGAATAGGCATAATTCTTATATGCNATTCAGTCACTTTTGGCACTAGCTTTTCCTTCTTGGATGTTCTTTCAGGGAACTGTCTCATTTAAGCAAGCATTATTATGTTTATTTTCTGGTTTCCCGAAAAGNNGTANGCTTTTAGGCTTCCTATCCGAATTACTAT
GmaAffx.89225.1.S1_s_at	CK606455	At1g31690	1e-72	Secondary Metabolism	Amines Biosynthesis		TAAGAACTGTTGTTACCGTGGGCAACTACGATAACATCATTGATTGGGAGTTTAAAACAAGTGGCTCAATCAAACCCTCGATTGCTCTCTCGGGTATATTAGAAATTAAGGGAGTGGATATTAAGCACAAGAGTGAGATCAAGAGCGATCAACATGGTATCTTGGTGTCGGCAAACAGCATTGGTGTTTACCACGACCACTTCTACATTTACCATCTTGACCTTGACATTGATGGTGTTGCCAACTCTTTTGAGAAGACAAGTTTGAAGACTGTAAGAGTGACAGATGGAAGTTCGAAGAGGAAAAGCTATTGGACAACTGAGGTTGAAACTGCCAAGACTGAAAATGATGCAAAGATAATACTTGGGTTGAGCCCTGGTGAGCTTTCAGTGGTGAATC…
GmaAffx.91756.1.S1_at	CF807481	At3g43810	1e-77	Signal Transduction	Calcium Binding		GGGACTGTTATGAGGTCACTTGGTCAAAACCCAACTGAGGCAGAACTGCAGGATATGATAAACGAGGTTGATGCTGATGGNGACGGAACCATCGATTTCCCAGAGTTCCTCAACCTGATGGCTCGCAAGATGAAAGACACCGACTCANAGGAGGAGCTTAAGGAGGCTTTCCGTGTGTTTGACAAGGATCAGAATGGTTTCATCTCTGCAGCTGAGCTCCGCCATGTCATGACAAATCTTGGGGAGAAGCTGACGGACGAGGAGGTGGATGAGATGATCCGTGAGGCCGATGTTGACGGTGA
Gma.8237.1.A1_at	AW309794	At1g69220	8e-13	Signal Transduction	MAPKKKK		AGGTCAATGGCATGGTTGTGTAACTAGTACCCAATGTTTTGCTGGTTGCTTTAACTATTTTTCCTAGTTTTGTTAAGTAAACCCTAGAAGATTTAGAGTTTTGTAAGCTGCCACATATTTGTATGTAAATAGAATATGCANNACTTTCGACTATTGCTGCATTTGCGCACACGTTGTAGTCACTAGTGGATTTGTT
Gma.8397.1.S1_at	BI321777	At1g09020	1e-105	Signal Transduction	Protein Kinase		GAAAGTGCTTTCTACACGGTGATTTTATCTCTCATTTCATTGTAATACAATTGGATTGGCCTCTTGCTTTATTGCCTCTTTTTAAGATTTTAGGCTGAGAAAGAGGCCTGTAAATTCAGAGTATTTGATTGCCCNAAATTTATTCATCTCTCCCCATTCGTATTATNNCTTCANAATGTATTGTGCTCCTGACATAGATACCAGCAAGGTGGGGGAGCACAACNTCTGTAATCATTCCCATCTGTGAAGATATCAAGTTTGAAGAAAAAAAATGAGGATGAAGATTGAAATAATGTTGTTTTATATTTGTTGATTAATAATCCTTAGGGTTTGATTGTTTACCTTAAGAACTTCAGCCGGAGTAGCTTATGAATAANGAACCGTTGCATATGAAGTTGT…
Gma.8366.1.S1_a_at	AW185494	At3g17850	1e-59	Signal Transduction	Protein Kinase		GTATACCTTGTACATATTTAGAGGTTCAAAGTGGTTCAGGATGTACTCTTTGCTTGTTAG
Gma.9902.1.A1_at	AW395328	At1g02090	6e-09	Signal Transduction	Protein Kinase		CGACATCGACTTCAGAGGGCATGAGGAGATCTGCTCTGAATCTGGTGGAGTGATGGATTATGAAGAAGATCGAAGCCGACCAAAGAGGAGGCGGCATCCAATTTCTTGAAGATTTANTAGATAAGGGAGCTCATTGGAGATGGGTTCTTTAGTTGCTTGCCTGACTTTTATTCATGGCATGCGTCAACAGAGGATATCAGCTTTTGCAGACAGACAAGTATATCTCATCGATATTGCCCTTGTCTGTCACACCACAAAGCGAGATAGGGACAAGGAAAAAAAGGAGGGAAAACCTGTTAATTTAGGAAATTGATAGTGTTTCTTGAACCATTATTTAATCGTCTACTGAGTTGGCAATAACAAGCTGAGATGGTGGTGCGGCTATTTATTTGCGGTTGC…
GmaAffx.33721.1.S1_at	BI967195	At3g20860	4e-09	Signal Transduction	Protein Kinase		GTACACATTCTTTGCTCCACGCATAAAGAAGATGATAATGCGGTGGAGGTTGATCAGGCACCAAGAGGTGTNTCATTGAGTGTAATAACTGAAGTAGATGGTGATGAAACAATCAAGACTCCGGTGGATAGTCCCTGCCAGCAAAGAGCGGATGCTCTGGAATCTCTGCTCGAATTATGTGCTCAGCTACTCAAGCAAGATAAACTCGATGAGCTTGCTGGGGTGCTAAGACCATTTGGGAAAGAAGCTGTCTCATCAAGAGAAACAGCAATATGGCTGGCAAAAAGCCTCATGTCTGCCCAAAAGTTTAATGCTGAAGCCTAAGTTCTGGCCATAAATTTATACATTGTTGTAAGAAATGTGCATTTCAAATGTCACATGAGTTCCTTTCGAGATTTG…
GmaAffx.21787.1.A1_at	AW348555	At5g61480	0.0002	Signal Transduction	Protein Kinase		AAATTGCTTGATGGTGTTCTAGGTCGATGTGCTGGGGACAATGTGGTTGTTGGTGGTGACATTCCTTTGCCACAAAAGCCAATTGCGGATCAATGTTAATGTGTTTATATGATTGAAATGATTTTTCTTTTTTTGGATATTTTTCTTATTGTGGGGGATTGGTATAGGAGAATCATTTTCTATTTTACTTTCAATGGAATTTCAAGTGTTACTTGTTCTAGTTTNNNNTTCTCCAGTGACACTAGTGTTATGACTCTTGTGTGCTCA
GmaAffx.50980.1.S1_s_at	BE823095		0.002	Signal Transduction	Protein Phosphatase		AGGCATAGTTCGGATAATGTGAGCGTGGTGGTGGTTGATTTGAGGAGAGATCAACGACAATCATCAAACTCCAATTAATTAACGTTGGNGAGAAACAAAACCAAAACCCTTTGTTTTCAGGACTTCGTTAAGAACGGGAAGACCAAATCAGAGGGAGGAGGGGCTTGNGGCTTTTGCTTTATCAAATGTTGATTGTAATGTAATGGGATTTTAGGTT
Gma.6700.1.S1_at	AW597543	At1g27320	4e-72	Signal Transduction	Histidine Kinase		TGTTGTCTTTTCTGCTGTGTTTGAAGGGTTCCCGTTTTAAAACATTGTTTTTGTGGCAGGGAGTGTACATAGGAGCCAAGTTTGATTGGTTGCAATTGAGTTGTAATTGGTTGTTAAGGGTACCAAAACCCATTAATTCTTCTTCCATGTAAAGTCAGCCGAAATGATTGAGGCTGATTAGAAGACTAGGGTGTATTATAATACAGGTTCTGGAGTCTCATCCTTGTGTATGTAATAATACAACTTATAGTAATCTAGCCTAGGCGCGTTACATTTTTATGTGTATTGATGCATGTATCACAAGGGCTTGATTCAGGTGAAAGGAAGAAAATTAGCTTCTTGGCATCAAAGGGGAGGAAGGAAGCAAGTACACACCATCAATCTTTGTATATGACTCAC…
Gma.5938.1.S1_at	BM139971	At1g09210	1e-140	Signal Transduction	Calcium Binding		ATTGAATTGTGGCAGGTGAAATCTGGTACTTTGTTTGACAATGTCTTAATTACTGATGATCCTGANTATGCNAAGCANCTGGNTGAAGAAACATGGGGCAAGCACAAGGATGNTGAGAAGNCAGCATTTGANGAGGCNGAGAAGAAGAGGGAAGAGGAGGAATCAAAGGATGACCCAGTTGACTCTGATGCTGATGAGGAAGAGGAAGATGCTGATGAAGCTGGCAATGACTCCGATGCTGAATCAAAGACGGAAGCTGGNGAAGACACCAAGGAAGAGGGTGTACATGATGAACTCTAGGAAGTTTGCAAAACGGATAAAGAGTGAGCGGAAGTTATATTCCGGATAGTTATATTTCAGTCGTAGTGTTTTTTGTTTTCCCTAGATAAGCAGACCGTG…
Gma.6101.1.S1_at	L01430.1	At3g43810	1e-80	Signal Transduction	Calcium Binding		AAGGTTGAACTTGTGATATAGTACACCTAGTCCTTGCCTAATGTCATTACTGTCTTATTTCTAGATTTTTATTTGATGTTTTTGAATTCAATCTAAACGACATTT
Gma.662.1.S1_at	CD409953	At1g70670	3e-68	Signal Transduction	Calcium Binding		TGGGTACTTATTATCGTCCGTTGCTGCTATTTTCATCAATGGAGGTNTCAGTCANAAAACCCGCCCGGGAAAGTTTCCTTCAATACTGCTACCAATTGAAGTTCAAAACATCCATAGAAGCAAGCATGGAAGTGACTCTGGTGTCTACGATAGTGAAGGAAGGTTTGTTCTTTCAAAATTTGAAGAAATTTTCAGCAAGCATGCTCGAACACACCCAAATTCTTTAACATCTGATGAATTGATGGGGATGCTTGTGGCAAATAGAGTTCCTAANGATTACGCTGGATGGCTTGCTAGCTACACGGAGTGGAAGATCCTATATGTTCTTGGCAAAGACAAGGATGGTTTACTGCACAAAGAGACTATTCGAGCTGTTTATGATGGAAGCCTCTTTGAAAA…
Gma.6393.2.S1_at	BM891503	At5g53000	1e-147	Signal Transduction	Protein Phosphatase		CACGTGGTGCTGGAAATAAGAAACTTACCCCTTGTGGGTAAACTGAGGTCTTCCCTGGCTTAAGTAACGGGCTTAGGATAAAACTGTTTTTAACGAAATCCCGTAATTTGGAGTTGATATACTACTTGTAGTTAGATTGTGTTAA
Gma.4487.1.S1_at	BE022586	At4g26470	1e-31	Signal Transduction	Protein Kinase		CATCTAAATATCTGACTGCCTCTTCAGCCAAGGCAAAAGGGTTTTTCTGGTTTTCCCTTGCAATAAAGGCCAAGTTGCTGCACGTTGAATTTTAAAGAAACTGTCATTCCTGAAGTTCGTTATGTAAATAGTAAGTGTAGAGCTAAGTGCCGTATTGAAGAAATGTTCAAATTTACGGATTAAATGCTACTACCATAGTGATTATGTATCGGTTGCTGCTTCTTTCTCTTTCTCGCTTAGTATTCAATTCTGCTATGTATTGAACTATAAATAGCCTGTGCTAGTGCACTACAATAATGAGAGGCAAACTGGCAAAGTGCATATCTACTCATTAAGTAGTTTAGCCCTTCCTAAAGAGCATATATATCTACATGTGATGAAATGGGTTAAACTAGCTAG…
Gma.5773.1.S1_x_at	AW432271	At1g71830	2e-58	Signal Transduction	Protein Kinase		ATAATCCTCGTTTGGAAGGTCCAGAGTTGTTGGGACTTGTNAGTTATGACACAAACTGCTCGTGAATAACGTGATGTGGTAGGATCTCAATCTGCGTTGAATTATATATATGTATTACCTCATAGTGTAATGGGCAGTGGTAAATGTAATCTCTGGTATATGTAAATTTACATACTGAAGGGCATTGGAATTTGTAACAATATTATGATCTGACNATGATGTTAAGACTTGAATATCTATTGATGTAATACTAAAAAAAAAATCGACTTGGTCACTCACTGATAAAATATTTGTGACGTATTGCTCTC
Gma.3665.1.S1_at	AF532628.1	At3g02520	7e-83	Signal Transduction	14-3-3		TGCGATGTGGTAGTTGATTGGATATGTATTACCGATAATATGGATCCAATGTGGCTTGCCATAGTGGGATTATTGTATTAATGAATTTTATGATTTCAAGTGCGCGTTGCGCTTGGGATTTACAATGTTTCAGTGGATTGTCTAATGTGTTTTATGGATG
Gma.3291.2.S1_at	BM520616	At2g30980	1e-120	Signal Transduction	Protein Kinase		AAATGCCCGTCTTCCTAATGGCCATCCACTGCCCCCACTTTTCAACTTCAAACAGGAGTTAGCTGGAGCATCACCTGAACTGATCAATAGGCTCATCCCAGAGCATATTAGGCGGCAGATGGGTCTCAGCTTCCCGCATTCTGCCGGTTCATAGATGCAAAGGGATAATGAAACGATGAGTCAACCGATATAGTGATCAATGTGAATCAACAGACAGGCTGTTTGTGGCCTATATATAACTTTTTCGTCCCCCTTGTGAAGATGTATACATGTGCTTGCTGCTCGGCTAAGCATGGAAGTTTGTGATTCTGTCTAGTATTTCATTCTAGTTAAAGCATACTTATCCCTGCATCTGTATATTGTTTTGGTCAGATTTCAGAAAGCTAGGAGTACAAAATG…
Gma.2729.1.S1_at	AW396742	At1g71230	1e-135	Signal Transduction	Unclassified		ACTCTTAACAGTAAATCTAGCCTTGTATTTTGCCTCTTTTTTTCCCTCGCGCTGTGCATATTCTTGTTTTATTTCACAAGAGTATGCATGTACTGTCAACCATGCAGTGGAATTCATCTAACAGAAAC
Gma.2496.1.S1_at	AF244888.1	At5g65700	0	Signal Transduction	Protein Kinase		GAAAAATGACAGACTCAAACAAGGAAGGAGTTCTAAAAGTTCTTGATCCTAGACTTCCCTCGGTTCCACTTCATGAGGTGATGCATGTTTTCTATGTAGCCATGCTGTGTGTTGAGGAACAGGCGGTGGAGAGGCCAACTATGCGCGAAGTTGTTCAAATTCTGACCGAGCTTCCAAANCCACCAAGCTCNAAACANGNNNNNNNNNCAATCACAGAATCCTCTTTGTCNTCATCAAACAGTTTAGNGTCTCCAACCACGGCATCAAAGGAACCNAAAGATAATCAACATCCTCCTCAGTCGCCACCANCCGATCTACTTAGNNTNNNNATTTNGAAGTGCTCAGTTGNGGANAGGGNTGTGTTTNATATTTNTTTCNTTTGGGTTGTGATAGCTTATC…
Gma.16816.1.S1_s_at	AJ004898.1	At5g38480	3e-27	Signal Transduction	14-3-3		ATGGCAGTAGTTGATGGGATATGTATTACCGATAATATACATCCAATGTGGCTTGCCATAGTGGAACTGTGTATTAATGAGTTTCGTGATTTCAATTGCGGGTTGC
Gma.16576.1.S1_at	BI967831	At1g78300	1e-120	Signal Transduction	14-3-3		GAGAGCACGCTCTCCGCCTACAAAGCCGCTCAGGACATTGCTAANACCGAGNTGCCTCCAACTCACCCTATCAGGCTGGGTCTTGCTCTGAANTTCTCNGTGTTTTACTATGAGATTCTTAACTCTCCTGATCGNGCNTGCAGCCTTGCAAAACAGGCTTTTGATGAGGCTATTGCTGAATTGGATACNTTGGGAGAGGANTCATACAAGGATAGCACTTTGATCATGCAACTNCTNCGTGATAACCTNACCCTCTGGACCTCTGACATGCAGGANGATGGTGCAGATGAAATTAAAGAAGCCGCACCCAAAGGTGACGGGGAACAAAATTAAACATACCATACTNTCTNNNNATTAGTNATTGAACTTCCCTTNTGTAATGTTTTCAAAGGGAGAAGG…
Gma.16576.1.S1_x_at	BI967831	At1g78300	1e-120	Signal Transduction	14-3-3		GAGAGCACGCTCTCCGCCTACAAAGCCGCTCAGGACATTGCTAANACCGAGNTGCCTCCAACTCACCCTATCAGGCTGGGTCTTGCTCTGAANTTCTCNGTGTTTTACTATGAGATTCTTAACTCTCCTGATCGNGCNTGCAGCCTTGCAAAACAGGCTTTTGATGAGGCTATTGCTGAATTGGATACNTTGGGAGAGGANTCATACAAGGATAGCACTTTGATCATGCAACTNCTNCGTGATAACCTNACCCTCTGGACCTCTGACATGCAGGANGATGGTGCAGATGAAATTAAAGAAGCCGCACCCAAAGGTGACGGGGAACAAAATTAAACATACCATACTNTCTNNNNATTAGTNATTGAACTTCCCTTNTGTAATGTTTTCAAAGGGAGAAGG…
Gma.16292.1.S1_at	CD402759	At1g75840	2e-92	Signal Transduction	Small GTPase		AAAGGCCTGTTCCATTTTGTGATCTTCAGTTCTTAATATAGTAGTTTGTGGAGGATGACATGACTGTAGTCTTCATCATTCTATATCTTATACTATTTCCAACCTAGATGAAGGAATCATCATGTCCAACTGACCGCATCAAGGTTCGCTCATAAGCATCGAGCTATCTGTCTAATTGTCTCTGGCTGTAGGATCTGTACAGTCGTAATTTCAATATGTTTGGTGTGCACACAACACTTGCGTTACTGTTGGCTGTTTACCTGTTGTATTGATTATTAAATGACCATTTCCAGCAGTGGACG
Gma.1965.1.S1_at	L01432.1	At3g43810	9e-77	Signal Transduction	Calcium Binding		GATGGCCAAGTGAGTGATCATCACATTATGGCCACAANAACCTAAATGAAGAANTGTTGATTAAAAGGAAANGACCAAAAAAACAGNGGTANGNGGAAGGNCAAGGGTTTGGGNNGTATAACAGTGATGTAGTAGTCCTTGNCCTTTCTTCTTCCTACATTTNTATTTGANGGTTTTTGAATCCAACCTTAAAATGTCAATTAGTGGCAANTCCTGCTACTAATGGNTGTAGTGGAACTGAACCTTCTTAGTTTGTCTNGTAATTTTNTCCAAGAAATAAAGGGTTGTAATGTTAATGTCNCTTCNCNTTCTNCCNCTCANNNNNNNNNNNNNNNNGATGACGAATATTGTGATATTTGACATGCATCGTAGTTTATTTGAAAAGTC
Gma.1965.1.S1_x_at	L01432.1	At3g43810	9e-77	Signal Transduction	Calcium Binding		GATGGCCAAGTGAGTGATCATCACATTATGGCCACAANAACCTAAATGAAGAANTGTTGATTAAAAGGAAANGACCAAAAAAACAGNGGTANGNGGAAGGNCAAGGGTTTGGGNNGTATAACAGTGATGTAGTAGTCCTTGNCCTTTCTTCTTCCTACATTTNTATTTGANGGTTTTTGAATCCAACCTTAAAATGTCAATTAGTGGCAANTCCTGCTACTAATGGNTGTAGTGGAACTGAACCTTCTTAGTTTGTCTNGTAATTTTNTCCAAGAAATAAAGGGTTGTAATGTTAATGTCNCTTCNCNTTCTNCCNCTCANNNNNNNNNNNNNNNNGATGACGAATATTGTGATATTTGACATGCATCGTAGTTTATTTGAAAAGTCAATGTGTGATAT…
Gma.1807.1.S1_at	BE821399	At1g75840	1e-92	Signal Transduction	Small GTPase		GTATTGACTGTCTGGCCAACGTTTAATGTTGCCTCTCCATTGGTTTGTCTTGTTTTGTTCCCTATCCTCTGTAGCAGAGNNCAGGAAGCTGTGTATAGTTTGGACTGACTTCTTAGGCCTTATAATCAATCACATGATTACTGCCTTGTCTGTCTCATTTTCATACTCTGTAATTAAAACTAGCTCAATTACATAGCTGGTGCCTACCTATTTCCTTCTACTATTATTATNNGTTAGTAGCCCATACTGCTTGCTTTGTGAATGTGGTC
Gma.10826.3.S1_at	CD390792	At5g55190	1e-107	Signal Transduction	Small GTPase		AATTGTGCTTTTTCTGAGTCGTGTTACTGCGTATGCTATGATATGTATTTTGGGGGGGTGTATTGTTGACATTTTTTGGATGCGGATTTGAGTATCAGAAATTTAATCATTTTGCTTTAATTAAAAATCTCTCCCAATAGTTTGACATATCCTTGTGGCCAAGGGCTGTAGTGCGTGTGTTTGTGTGATTTGGCTCTCTTGAACAGAGAGACACGGGGGAAAGAGCAAACAAGGCTGTTTGTGCCAAGTGCTATTTTGCTTCTCGAGTTTGTCCCTCCAACAAGAAATGATATTGGCTTATTTCCTCCTANTTAAAACGACTAGTTTGGTGAAGTCAATTTAATATTCAGTGAACAATGTCGAAAACATTACGTACATATTCGTATACATTCCATTGGC…
Gma.105.1.S1_at	U70535.1	At2g42590	1e-100	Signal Transduction	14-3-3		GGGACAATCTCACCCTGTGGACTTCTGACATCCCTGAAGANGGAGNNNAGGAACAAAAGGTGGATTCTGCCNGAGCTGCTGGAGGTGACNATGCATAGNNNNNNNNGTATTGGCNAAGGAATTTGTGGNGTGCATACGAGAAGGCTAGTCTNTCTCTTGATANTTTACCATTAGGATGTNGTAATAGAACATGGANTTGGTCTCTAGAAAATCACCATANGGCTTTGTGAGCCTTTTATTCTATGCGTGTGCTTTCTGTTACTGGANNNNGACTGGAGTTGAGATTTGNATGNTGTTTGNCTGTNATTNAGTGAATTTCTTCATTTTGACTTTCTTTCTAANAGGATGCTACCTTGCATTCTTTTATCAGTTTACATAGATAATATTTATTTCAAATTA…
Gma.10700.1.S1_at	BI969224	At1g78300	1e-112	Signal Transduction	14-3-3		ACTCATCCAATTAGGCTTGGCCTTGCNCTTAACTTNTCTGTATTTTACTACGAAATCCTTAANTCTCCNGATCGTGCCTGCAACCTTGCAAAACAGGCTTTTGATGAAGCTATTGCTGAATTGGATACACTGGGAGAGGAGTCATACAAGGATAGCACTNTGATCATGCAACTCCTTCGTGATAACCTCACNCTTTGGACCTCTGACATGCAGGANGATGGAGCAGATGAAATTAAAGAAGCAGCACCGAAACNGGATGACCAGTAAAAATATTTTACTGCTAATTAGAATTGAACTTCTCCTCCATATCTTTTTGAAGGGAGAAGGTGTTTGTTGCTAATATCTCTTTGGTACTG
Gma.11182.2.S1_at	BU080899	At3g21220	1e-54	Signal Transduction	MAPKK		CTCTTCCCTCCTAGTATGATGGATCCTTCNACATGCCTATTGNCTATTGCCTAGCTAGCTAGCCCTGTGTGCCGCTTTATTTTCATTTTCATTTTCATTTTCATACAGAATCAAATCTTAATATTGGATTTTCAGCCATACATTACAGTGTTTTTCTTCTTACCATAANANNNNNNNNNNNNNNNNTCCATTCTTTTTCTCTTTTAGTATTATTATCTTTTTCAAGCCCCCTCAGCCTCAGTCCCTGGTTATTATTGTTATGTTATGCCAATTGCCCAGTGAGTAGTACGGTTATAACCTGCAGGTGCCTTTTCTTTCTTGATTTAATCATCTTCTTATTTAGAGCTACATCAC
Gma.11129.1.S1_s_at	BE657610	At5g26751	0	Signal Transduction	Protein Kinase		TTGTTGGTATCTTTATTGTATTCGGTTGCCCTGTAAAATCAGATTTAGAGATACATGCTACTCATTATCATCCTACCCCCCGATGGGTATGTAGTAGAATACCCTGTTTCCTGTATCACAGCAGATTGTA
Gma.12076.1.S1_at	CD410539	At4g31860	1e-154	Signal Transduction	Protein Phosphatase		CAAGAGCTATTGGTGACATGGAATTTAAACAGAATAAGTTTCTTNCTGCTGAAAAACAAATTGTAACTGCCAATCCAGACATNAACACTGTTGAGCTTTGTGACGAAGATGANTTTGTGGTGTTAGCTTGTGATGGCATATGGGATTGCATGTCAAGTCAACAACTGGTNGATTTTGTTCNTGAACAATTGCACTNGNAAACNAAACTTTCTGCNGTGTGNGAAAGNGTACTTGANCGGTGTTTGGCACCATCAACTGCNNGTGGTGAAGGATGTGACAACATGACCATGATTGTGGTGCAGTTCAAAAGACCTGCTCAGTCCAGTGTACCAGCAGAAGAGTCCTCTTCAAACTGACAAGCTGAACCTGAAACAAAACTAGAGAGAAGTGAGAGTTAGC…
Gma.1417.1.S1_at	AW306800	At1g35160	1e-93	Signal Transduction	14-3-3		AACCGCTGCTGAGGATACCATGTTGTCTTACAAGGCTGCCCAGGACATTGCTTCTGGGGATCTTCCCCCTACTCACCCCATCAGATTGGGTCTCGCTCTCAACTTCTCCGTCTTCTACTATGAAATCCTCAACCAGTCTGACAAAGCGTGTGCCATGGCTAAACAGGCTTTTGAGGAAGCAATTGCTGAGCTGGACACCTTGGGAGAAGAATCCTACAAAGACAGCACGCTCATAATGCAGCTTTTAAGAGACAACCTCACCCTTTGGACTTCTGATGTCCAGGACCAGCTAGATGAGCCCTGATATCCATTATAGGTTTGATGGGTGGTATTCTTCCTCTCATGGAGGTGGGCTTTGAATGTCATTTCTTTGTGCTAAATTAAGAATCGCCCTAGTTT…
Gma.1400.2.S1_at	BG510739	At5g25110	1e-105	Signal Transduction	Protein Kinase	AtCIPKs	GCCAAGTCTGCTGGAGACACGCTTGAATACATTAAATTCTGTGAGGACCAAGTCAGACCTTCTCTCAAAGACATTGTGTGGAGTTGGCAAGGGGACGCTAATTGCCACCAGTAACGCAATGGAGTTACTTTCCGTTATGTCTTAATCTTTTGCTTGTTTCCATTATCACAATCCGTTTGGGTTTAGATTTATTACCCATGTAATGTAATATTCTTAGTTCTTATTTCCTCCTCCAAGCTTATTTATTTATGACTTTNNTTTGTATTCCNNAANNNANANNNNANNNTGCTAATCTGTATGATGTCAGAATTTGTTATAATACTAGCTAGTACTGGTATTTTAGCATGTTCCTGCAAAACAGCGACAG
Gma.1411.1.S1_a_at	CD417799	At4g29080	2e-74	Transcription	Transcription Factor	AUX/IAA	AGAGCCATGGAAAAGTGCAAAAGTCGCTACTAGCTAGTGCAATGCTGTATGCTTTTGTCTTCTAATCCTGAAAGATGGAAGACCACATTTAAGCATATAATACCTGAGTATTTCTTACGTATAATTCTATATACGAGATTGGGGTGTCCTAAACTTTTTAGTGGGCAATATATATTGATGACAGCATATTAGGTTTGTTGTAGTAGCCGTCTATATCATTGATGTAGATGTTTAAGGTTTTAGGTTGTTCTCCCACACTTCA
Gma.1538.2.A1_at	CA935611	At4g27000	5e-30	Transcription	Transcription Factor	Unclassified	TCCTGGGTATGCGAATTACCAACCTCCCCAGCAACAGCAGCAAATAGGATATAGCTAAGAAGTTGGGCACCAATTTTTTCCGTTTTCTTCTGTAATGCTATGCTATTGCTAAGATACTCGTTTTGGTTGCTTCTCTTTTATTGTATCGTGGAGAACAAACTTGGCTGAATACATTCTATGCGAATAGGATATAGCTAAGAAGTTTCTTATGACATTCTATGCGAATTTTATTTTGTATCCATTAAATATTGCTTGCTG
Gma.1538.2.A1_x_at	CA935611	At4g27000	5e-30	Transcription	Transcription Factor	Unclassified	GGCACTGCGGGTTTTGAATGGCACACTTCTAGGCGGACAAAATGTTAGGCTTTCATGGGGGCGAAGTCCTTCAAACAAACAGGCTCAACCAGATGCAAACCAGTGGAATGGTAGTGGTGGTGGATACTACGGATATGCTCAGGGGGGCTATGAAAATTATGGTTATGCCCCTGCTGGACAGGACCCCAATATGTATGGCAGTTATCCTGGGTATGCGAATTACCAACCTCCCCAGCAACAGCAGCAAATAGGATATAGCTAAGAAGTTGGGCACCAATTTTTTCCGTTTTCTTCTGTAATGCTATGCTATTGCTAAGATACTCGTTTTGGTTGCTTCTCTTTTATTGTATCGTGGAGAACAAACTTGGCTGAATACATTCTATGCGAATAGGATATAGC…
Gma.15654.1.S1_at	CD401214	At5g15020	3e-20	Transcription	Transcription Factor	Unclassified	GTTCTCTAACATCTTCTAAAACAGCTGAGACTCAAATACATANATGTNNGAGTCTTGGTGTAGCAACCTAGGAACCCTTTGGGTTTACAATTTTATTTGTTGTCATAGTACTTGAATTTTCACATGAAAGTGGAGGAAGGGAATATAGAGATGGGAGTGTGTAATGCGTTTATGAGGTCTCATGCGTTTTGCACACTCCTTTGTAAATAGTTTGCTTCAATATATTTGTAGAAATATTGTTTACCAAATTGTTTATTAGTTGCAACACAGTTGCTTCCTCCG
Gma.15605.1.S1_at	BM143798	At3g16770	6e-29	Transcription	Transcription Factor	AP2/EREBP	GAACAAAGCAGCAGCTCACAATCCACCACTGGATCCACCGGATCGCCGCCTTCCGCCGCCTTCCACGGCGGAGGAGATGAACTCGACCTGAAACAACTTGAACGGTTTCTAGGGTTGGACAACATGGGTGCTGAGTGGGACAACATGGATGACCTGTGGATGCTGGACGACGTCGTTGTGCCCAACCGTCACTTAATTTACTAGAAGGGAGATAATTAATTAATTAATAAATGGCGTTTTCTTAAGTTATAGTTTTATAAAACTATGTTGGTGTATGTGTTCTTAGTTTTCTGTTTTGTCTTGTCCTCTCGCTTTGGTAATTTCTGTTTTGTACGGTCGAATTATTTCAAAATTAGGTGCAACGTATCATGAGAGGGATGATTATATGTTATCATTATG…
Gma.1270.1.S1_at	CD405147	At1g10200	3e-85	Transcription	Transcription Factor	Unclassified	GTGACTGTGAATGGAACCCCTTACCATAAGAGTTGTTTCAAATGCTGCCATGGAGGGTGTGTTATCAGTCCTTCCAATTACATAGCACACGAGGGAAAACTCTACTGCAAACACCACCATGTCCAATTGATCAAGGAGAAGGGCAATTTAAGCCAACTTGAAGGTGACAATGAGAAGAGTGCAACTAATGGGAAAATCAATGGTGAAGAAGTTGCCACGGAGACATGATGAAAGAGTCGAGTCTCAGAATTGTNCTTTCTCAAGTTCCATATTTGTGCACCATATGTTTCTGCTGTCTCTCATGCTTTTACCATTACTTTGCAGTCCGGGAAGCTCTTTACCCGTGACAAATATGGTATTCAATTTTTTGTTAGTTGAACTGTGTGGATCTTCATCATC…
Gma.13113.1.S1_at	CD391920	At2g42280	1e-46	Transcription	Transcription Factor	Basic Helix-Loop-Helix (bHLH)	TTCTTCTGCTTTGGCTCATCAATTGAGTTTGCCAAATACTTCTGCAGAAATGGCAGCCATTGAGAAGTTTCTGCAGCTCTCAGATTCTGTTCCTTGCAAAATTCGTGCCAAACGGGGCTGTGCCACTCACCCAAGAAGCATTGCAGAGAGGGTTAGAAGAACTAAAATTAGTGAGCGAATGAGGAAGCTACAAGATCTCGTTCCCAACATGGATAAGCAAACAAACACAGCTGACATGTTGGACTTGGCTGTTGAGTACATTAAAGACCTTCAAAACCAAGTTCAGACTCTTTCGGACAATCGGGCAAAGTGTACGTGTTCACACAAGAAGCAGCAATAACGCAAAAGGAGGAGGATACCCGCGTCATTACGTGTACAGCTTAGTAATAATTTGGTCTA…
Gma.11133.2.S1_at	CD401186	At1g17880	6e-58	Transcription	Transcription Factor	General	GAATGATGACGACGTCCCAGAGCTTGTTCCAGGCCAGGATTTTGAGACAGCTGCTGAGGAGACCAAGGCTGCTTCTTAGATTGTGCCATCGCTAAATATCTCCTGTGTTTTAATTTTTTCTTCTTCTTGATTTTCCATTTTAAGTATTTCAGGTGTTTGGTTCTCCTGTCATATACTTTAAAC
Gma.10919.3.S1_at	BQ630441	At3g52800	2e-43	Transcription	Transcription Factor	Zinc Finger	TTAATATTTTTCTACAGGCATTTCTANNNTTCTTCCGTTTGCGAGAAAGGTAAATTATCGTCTGCGTTGTA
Gma.10608.1.S1_x_at	BM107802	At3g20770	1e-165	Transcription	Transcription Factor	Unclassified	TTTCCCTGGTCAAGGAATGGTGTTGGAAGGGAACTTNTTTGCACGAGAGGAAGGTCAATTTGACCGGTTCAAGGCCACCATGAACATGAACANNNNNNNNNNNNCTCNNNNNNCTTTTGATACCAACCANNNCAACAANAATAATATCCATTTGATGTTTAATTCCCCTTGTGATTTGTCATCCTTTGATTTCAAGGAGGATATACAAGGAGNNNTAGGAATGGATNCTCTTCANAAACAGCAAGAGGTTTCAATTTGGTACCAGTGAAAATGNNAAGAGGGNAAACTCGTGTATCANGGNCTTTTATTGTGTCATTAAANANGGGNCATGTGAAAGTCCCTTGACTCAAAANGCAGTTAATGCATTTTTCTTCCCATGTAATNGTTTAGGTCTTNAGA…
Gma.10672.1.S1_at	BU545369	At3g62420	9e-36	Transcription	Transcription Factor	Basic Leucine Zipper (bZIP)	AGCTTGCGGAGAACATAGAGGCCAAGGAAGAAGCGTGCGTCGAGACCGAAGCGGCGAACAGCATTCTGAGAGCACAGACAATGGAACTGGCCGATCGATTGCGCTTCTTGAACTCCATCCTTGAGATCGCTGAAGAGGTCGAAGGGTTATCCGTTGAGATTCCCGAGATTCCAGATCCTCTCCTCAAGCCCTGGCAGATTCCTCATCCGATACAACCGATTATGGCCACCGCAAACATGTTTCTGCGTTGATCATTCCTGAGGATTTTACTTTAATTAGGGTTATTCAGTGCGGTAGTAACTTTCTCTGTTATGTGTATTATATTACTATTAGTGTTATCTGTCTGCATCAAAAGTATCGTGTGGTCATCAATGCATTGGGTTCCTGAGAGAGATGAAT…
Gma.10672.2.S1_s_at	AW349688	At3g62420	4e-35	Transcription	Transcription Factor	Basic Leucine Zipper (bZIP)	GACCGATGAAGTTAGCAGATTGCAAGGCGCGAACAAGAAGCTGGCGGAGAACATAAAGGCAAAGGAAGAAGCATGCGTGGAGACCGAAGCCGCGAACAGCATTCTGAGGGCTCAGACAATGGAACTGGCCGATCGATTGCGCTTCTTGAACTCCATCCTTGAGATCGCTGAAGAGGTCGAGGGATTATCCGTTGAGATTCCCGAGATTCCAGATCCTCTCCTCAAGCCCTGGCAGATTCCTCATCCCATACAACCGATTATGGCCACCGCAAACATGTTTCTGCGTTGAT
Gma.2010.1.S1_a_at	CD402050	At5g57660	2e-90	Transcription	Transcription Factor	Zinc Finger	TATGCGGAAACCCGGCCCAGGATAAAAGGCCGGTTCGCGAAACGAACCGAAATTGACTCGGATGTGGAGCGTCTCTATAGCCCTGGCGCTGCGGCGCTCATGCTGGACACTCCATACGGTGTCGTACCAACGTTTTAGTTAATTAATCAAAAAGAAGAAGAGACGATGGGTGCATGAATATAGTGTTGGGAAATCTTAGAATAATGATTAGTGATTCTGTGGGATTATTAGGGGAAAAAAGGTGAAGAATCGAATCGGTACGAACGCGATTCTTAGCTGGAGCGCGATGGGAAGATTATTGTGAAGATTTGTCTCGATCGACCAGAAAAGCCCGTTTACTTTTAAAGGGGGCTTCTGTTCCATATTCACCTCGTGTAGAATTAGAACCTGTACTGTAAA…
Gma.1748.1.S1_at	AW278292	At1g69490	2e-82	Transcription	Transcription Factor	NAC Domain	TGAAATTTCCAAGGACTAGTTCCCTTACTCATCTTTTGGAAATGGATTACTTGGGTCCAATATCACATATATTANCTGATGCCNCATACAATTCAACCTTTGATTTTCAAATTAACACTGCCAATGGTGGAATAGACCCGTTCGTAAAACCACAGCCGGTTGAAATCCCTTATGCAGCAGATTCAGGGAAGTACCAAGTGAAACAAAATAGCACCATCAACCCCACCATATTTGTGAACCAAGTGTATTATCAAAGAGGATAATGCCAAAAAAAATATTAAAAAAAATGAAATTGGATTATTTGGACATGACGATAAGCGTCACCAATTAAATAATCCTGAAGATTCTTTGTAAATATATATATATATATATATATATATATAAATATAAGAATTTTCA…
Gma.17889.1.S1_at	BM270487	At1g24450	3e-48	Transcription			TCCAGAAACAACTCGGGTACACCTTCAAGAGCATCGATCTTCTTCGTCGCGCCATGACACACGCTTCCTTCTCCGAAGAAAACAACAAAGCTTTCGCCATTCTCGGCGCCAGCGTCATCGAAACCTCCGTCTCTTTCCATCTGCTCTCCAGAGACGTTGATCTTTCTTCCAAAGAGCTGAACCGTCGATTGTCCCAAATCACCAACGTCGATTCCTCCTGCGCCGTCGACGGAACGCGATTAGGGTTGCACAAGGTGGTTCGCGTCTCGCCCAAGACAAATTCCTCCGCCCCCGCCGTCGTTTGCGGCGCCTTCCGAGCAATCTTTGGCGCTGTTGCTATTGACACCGGCAAGTCCGATGACGCAGGCAACGTTTTCTGGAACCTTCATGGCGGTGGTG…
Gma.17759.1.S1_at	BU927041	At3g04730	4e-16	Transcription	Transcription Factor	AUX/IAA	GAGGGTTTTTTCGGATACTGCCGTGGATTTGAAGCTT
Gma.16603.1.S1_at	BQ452906	At5g62020	8e-14	Transcription	Transcription Factor	Heat Shock	TGCATCACGTGGGTTCTGCAGACGTGAAATCTGAGCCGTTGGATTGCCAGNNNNNTNNNNNGNNNNAGGAAACGCCGTGGTTGAGTCCGTGTCACAGGACAAATCAAAGGGTGTGCAACTGACACGCGGCGACGGCTAATCGAATGAAACATTTTAGATTAGATACGTAGTGCTGTAGGGAATCCGAAACCGGCACGCGGAGACGTCACGTGCGTCGTTTAACCGTTTGGGACCGATTCCCAGAAGTTTCTCAGAAGTCAGAGGAAAACGATACTTTCTAATCCTTTTTTCTTCGCTATCTCTTTTTTATTTATATTATATATTCGTTAAATTGGACTTGGACTGTAGCTTTGCCATTGAGGGTAGTGTTGAATATTTCATTAGTCCTATAAATTATTT…
Gma.16611.1.S1_at	AW348526	At1g78080	4e-59	Transcription	Transcription Factor	AP2/EREBP	GAAGCCTCCGAGGAAAACGCGATCCAAACTCGCTTCTCCGCCAGAGAACGACAACAACAACGACAACAACTCTTGTAAGGTCGAAGCTGCTTCCTCCTCTTCTGAAGGTTCTTCGCCGCTTTCGGTTCTGACTTNCNCNGACGTNAGCNAGCCGCAGTGGGAAGGTGATTCGGATAATTTTAATCTCCAGAAGTACCCCTCTTATGAGATCGACTGGGATTCTCTGTGAAGCCGTGTTTTCTTAGTGTCCTATGTTGTTATGTAAGGGTATTAATCTTCATTATGTATGGTCTAGTCTAGGTCTTAGTGTCTTCTCAGGTGGCTGCTACTGCAATGGAGTTTTTGGCAATTGCAGAGCCAGTCTTAGTTAATTACTAGTATTCTGTGTATAATCTCTCT…
Gma.16547.1.S1_at	BU545050	At2g47260	4e-46	Transcription	Transcription Factor	WRKY	AGGACTTTGTTGCTGCACTGGGATATTTAAGTTTTAGTTTTCATTCTCATCATGATCACACTTGTAAAACCCACGTTATCTTTTTGCACATATACTATATAATAGGCCTT
Gma.16613.1.S1_at	BU760651	At5g04340	2e-35	Transcription	Transcription Factor	Zinc Finger	GGATTCTTGTTTGCCATTGATTGAATCTAACAATTGTTTTCATCANNAGTAATATTTATGCCAAAGATAAATATACAGGTT
Gma.17473.2.S1_a_at	BG237175	At2g40140	1e-125	Transcription	Transcription Factor	Zinc Finger	CATTGATTAAGCAGCACAATTCTTTTTTATAT
Gma.17473.2.S1_at	BG237175	At2g40140	1e-125	Transcription	Transcription Factor	Zinc Finger	TCATTTGAAATGCTTCTACTATCCAATATTACACAATATTATTAGGGATAGGATGACATATGTTGCAAAGAACAAAGTTCAGGTTAATCCAGAGATTCAAACGGGAGTTCCAACTTCTAGATCAGGGAAGACTTGGAGAAACGTTGAACAAAGGATGCTGAATTTTTTTTATTGTATAATATAAATTTATAACCCCCTTTTCTCTACCGATGGATGTATTTTCTCTGGCAAGTGGACCCCAAAGTGGTTGTCATTGATTAAGCAGC
Gma.17473.2.S1_x_at	BG237175	At2g40140	1e-125	Transcription	Transcription Factor	Zinc Finger	TCATTTGAAATGCTTCTACTATCCAATATTACACAATATTATTAGGGATAGGATGACATATGTTGCAAAGAACAAAGTTCAGGTTAATCCAGAGATTCAAACGGGAGTTCCAACTTCTAGATCAGGGAAGACTTGGAGAAACGTTGAACAAAGGATGCTGAATTTTTTTTATTGTATAATATAAATTTATAACCCCCTTTTCTCTACCGATGGATGTATTTTCTCTGGCAAGTGGACCCCAAAGTGGTTGTCATTGATTAAGCAGCACAATTCTTTTTTA
Gma.2563.1.S1_a_at	BQ742867	At5g62000	0	Transcription	Transcription Factor	ARF	CTTGACGCCTAATGATTAGTAGATTGATTTCCATAGCTTTCAGATTCTGGGATGGAAAGTAAGGAACTGTCATGAAGCCATCCATCCAGTTGGAAAACATAACTTGAAGATGAAATCGAGGCTGACTGCTGCTTATCAGTGACTGCTTCAAATCAAATATATAAGATGGCATTAAAAGAGTAGTATCCGTCCAATTTTGGAAATCCCGGAATTAGTAGTATATGCCTGCCCAGTTATACAATCCCTAGTATTTAATCAATTGTGTTTTTGAGTGAGGTGATATA
Gma.3176.1.S1_a_at	BU549115	At1g07470	5e-23	Transcription	Transcription Factor	General	AACAACGATAATGTCAAGTTTGCTTTTCTTGGTTCCAACATGATCTCTGAACTTTAGCCCAAAAAGTGAAAGAAAACATGACAATTTCAGGAATATGTTTTCTACATCAGCAACGTTCGTCATTTCTTGT
Gma.3158.1.S1_at	AW569867	At5g65670	1e-111	Transcription	Transcription Factor	AUX/IAA	GAGGGATCTTCTGCATGGTTCTGAGTATGTTCTCACTTATGAAGATAAAGATGGAGATTGGATGCTTGTAGGGGATGTNCCATGGGAAATGTTCATTGANACTTGCAAAAGGCTGAAAATTATGAAGGGTTCTGATGCCATTGGTTTAGCTCCCAGGGCCATGGAAAAGTCNAAAAGCAGGANTTAGGNTATCCTGGANTNCNTNTNTTGTCTNATCAANGTGTTTATTGTTGGATCCTCCGGAATGGGAAAAGCAAAGGATGATGANNNNNCTGAANTCCTGGCATTGGTGGTTTAACGCCCTTCCACTTATTTGTTTTCAAGTCCCTCAAGAGTTTGTCATGGTCCTGTGTTAATTTGTTACCACTGTAATATCATATGAAAGCTACAATGAAATAT…
Gma.4165.1.S1_at	BI969143	At4g13640	5e-13	Transcription	Transcription Factor	Unclassified	GAAGAAATACCGCTGAGTCTCCCACCCCAAAGGGCTGATTGTTCAACCGAAAGTTGTTTAACCTCACATGAGAGTTCTGGAGGATTGGCTTTAGAAGGATCTCCNGGCGAGGGAAAAAGGAGGATGCTTGGCATGGACTCGATGGCAGCACCTTTGATATGGAGTGAAGCTAAGATGAGAACTCAAGCCATCAATGTAGCCCAAGGTAATCTTCCTCAAGGAATAACTAGGTATGGCATGTAGGGATGGAAGGTCTACTTGATGGTTTATCCCGGCATGATATATAAACCTTTGGGCTTTCATTCATTCCTTTTTTTATAGGTACTTGAACTCTTCATGTCTTGTAAGTTAGTGAGACATAGGTGGAATCAATTTTACCCCTTTGTAAATTCAATCTAC…
Gma.4434.1.S1_at	BE659015	At5g20230	1e-21	Transcription	Transcription Factor	Unclassified	GTTACAAAGGCCAACTTCGATGCTTGCAGCTCAGCCTCTCCTATTGCCACTTTCACCACTCCACCTGCGAGAGTGACCCTCAACAAATCTGGTCAACATTTCTTCATCTGTGGAATTCCAGGGCACTGNTTGGGAGGTCAAAAGCTTGCCATCAACGTCACCGGCAGCAGCACCGCCACCCCACCTTCCGCCGCGGCCCCCCCCACCACTCCTTCTAGCCCTTCTCCAGCCGGTGCTGTCACTCCTCCCCCACAGAACTCTGGTGCTGCATCTCTTGGAGTTGTTGGAGTATTTGCCACCCTGCTTTCAGTTGCCGCCACTTTTTTCTATTAGATACTCCACGAGATTATTCTAGTCAGGAGCTTGCGAGTCATCATCATCGCTCTTTGATTGTGTTTC…
Gma.4394.1.S1_a_at	CD409273	At3g01470	3e-28	Transcription	Transcription Factor	Homeodomain	AGATCACGCCCTTTGGACCTGGGCATACTAAGTTTTCTTCCATGTTCATGTGTGTGTTTGTGTCATATGTTTTTTTAGTAATTAGTATTTAGTATTTGCACTTTTTGTCCAGGCTTCAAAAATGGCTATAGCTTTA
Gma.4412.1.S1_s_at	L28002.1	At1g55520	1e-102	Transcription	Transcription Factor	General	TAAAGACAGCCGTTTGTGTTGCCCCTTGTCTTNNTTTTTTTGATTNGTCNTGATGTAGTAAAGTGGCAGACGTTGTNCTATTGAATTGACATTTTTNANAAAAAANANNNNNNNAAGAGGATTTTGAGGTGTCAGAAATGAGGAAAAAAA
Gma.4412.1.S1_x_at	L28002.1	At1g55520	1e-102	Transcription	Transcription Factor	General	CAAAATTCAGAACATTGTCGGCTCTTGTGATGTCAAGTTCCCCATACGGCTGGAGGGTCTTGCATATTCCCATGGTGCTTTNTCAAGTTATGAACCAGAGCTGTTTCCAGGNCTAATCTACCGTATGAAGCAACCNAAAATAGTNTTGCTTATATTTGTCTCTGGAAAAATTGTTCTAACAGGAGCCAAGGTGAGAGATGAGACTTACACTGCCTTTGAAAACATATATCCNGTGCTTACNGAGTTCAGGAAAAACCAACAATGATTGNTNNTTCAAGAAAGAGCAGGAGCAGTGGTNTGGCAGAGAAGTTCGTGGAACTGTAAATATTAAGACNAAGGANATAATCTANATTGATATANNAATTAAAGACAGCCGTTTGTGTTGCCCCTTGTCTTNNT…
Gma.4259.1.S1_at	CD412731	At3g04730	4e-62	Transcription	Transcription Factor	AUX/IAA	TTATTATGTGTCTCTGTAATTTTCTTATATGTGTATTATACGAATGAGAAAATAGTTGGAAATTCGTTAGGGACAAGAAATAATATAGAAGATGTTTATATGATCCCGTTTTTGTTTCCAGGTAAAAATATGTGACTTTGTCCATTCTATTGCCTGCTTAATNATAATGTCAATGTTTCCAGTTTATCTTAACAGGGTTTTG
Gma.4259.1.S1_s_at	CD412731	At3g04730	4e-62	Transcription	Transcription Factor	AUX/IAA	TCGCATAATGAAAGGTTCTGAGGCTATCGGCCTTGCACCAAGAGCCGTGGAAAAGTGCAAGAACAGAAGCTGAAGTGATTTTAGGGTTCGGCCACAACAATCGGCTTGGTTGTTCATCTGTGTCACAAGGAA
Gma.4322.1.S1_at	BI784951	At2g41900	4e-95	Transcription	Transcription Factor	Zinc Finger	GGATTGGTTGGCTGCGAAGTTACCTGAAGGATATTCTATTTTTTCTTCTTTTTTTAAATAATAATTGTCATTCATTATTTTACTACAGAGCTTCAAGAGAGTTGAAGAAGCTCTCTCTCTTGGGGCTGAAATTCAATAGTAGGAGAAAAATCCTGTCGAGGTTATCTATTTTTCTTCCAAAACGGCCCCGTTTCAGGATTTTTCCCCTTGCTATTTTACTTGATTTCTGAGTTCACTATCAAGCAAGCTAGTTTGGTTTATAATGGAACAAAAACCATTATTAGCCTGCGTTTGTTTTNAAAGATTTTTCTGAAGTTCACTAAGTTAAGCCAAGTCAATGATTTGCTGTTGCCTATGGTTGAAGTTGTTTCTTTCTGAGGGAATAATTAGAGATGATCT…
Gma.5076.1.S1_at	BE657174	At2g41900	7e-58	Transcription	Transcription Factor	Zinc Finger	ATACTGAAGCGAGGGATGGCTGCAAAGTACCCGAATGATAATCTATTTTTCCCCCCCCATTATTTTGTCATTCATTGTTTTACTAAAGAGCTTCAGGGGGAGTGGTAAGAAACCCTCTCTCTGGGGTTGATGATATCCCAGTAAAAAAGAAAATATTCTTCCAAAACTCTAGTTTCAGGACTCTTTTCTTCATTTTATTCCTAGCCATGGAAAAACCAAGAGCCTCATATTTGTATTCAAGTTCGTTTTCTTGGTAGGAATCTGCTAGTATATTGCTATGCTATTGCATGTATAGAAGACTAGAGTGTGTTTATTGTTAAGGAATTAGAGGTGATCTGCGCCATTAATATTTATTGCCGGCAGATCGTTTAGACATACTGAAGGCTACTGTGTA
Gma.4836.1.S1_s_at	BI969339	At1g61700	3e-35	Transcription			TCGTTGTTTCACCTGCGGAAAGGTCATTGGAAACAAATGGGATACCTATTTGGACCTTCTGCAGTCAGATTACAGTGAAGGAGATGCACTGGATGCTTTGGGACTGGTTCGATATTGCTGTAGGCGCATGCTTATGACCCATGTCGATCTCATTGAGAAGTTACTGAATTACAACACTCTGGACAAGTCTGATCCCAGTTAAGAAGGCTTAAGGAGCAAAGAATGACCAAGATGTTTCAGTTGCATTCCATGCTATCTGGCCAATGAACAATCTTTTTTCCTTTTCTGAATTGTTTTGCTACAAGCTGGTCATGGTTGTGTGC
Gma.606.1.S1_at	CD404956	At5g65670	1e-78	Transcription	Transcription Factor	AUX/IAA	GAAGCCATTGGTCTAGCACCAAGAGCTGTTGAAAAAAGTAAGAGNAGGAACTAGGCAGNATNAAGCATCTCATCACACNNNTCTATCCATCTAACTGCTTNTGGGGTTAAAANGNTTTCTTGGCTNTGTGAGGGAGCAACACAAGGCCATAATGGCTTGGAANCACAACTNNAGGCATGTTNGGACTGGATAGAATTTNGTACTAAAGCTGCCTTGTTGATCATGATATTATTTACTATCNGTGTGTTCTGTTGTCATGATGTTTTATATTCAGTAAGCTTTTTTCATGATTGTCACAACTTATAAAACCCCAAAAAACCTGTCTGTGGGAGGTTCTTATATTTTNNATGTGCTNTCATGTTCNTGTTGTGGTGAAGGATTTGTAGTTTGTAAATTGNA…
Gma.593.1.S1_x_at	AW351331	At1g74840	1e-38	Transcription	Transcription Factor	MYB	GGAAGAACTCACTCTGGGACAAGGAAACGTGGAAAAACACAATGTGCCAAACAAGGCCTCTACAGTGTCTGGTATCATCACCCCCGGTTCTTCTAGTTCTGCCATTGACCCACCACCGACACTGTCCCTGGGGCTATCCTTCTCATCTGACCAAAGACAGACATCATCAAGACATTCAGCTTTACATGCCATGCAATGTTTCAGCAATGGAGATAGCATCATTAGTGTTGCTTGAGAATATGGTCCTTGGATTCACAGATTAATTACATATATTAATATTTCTCTAGTTTCCTGTCTTTTTGGTGGGAGAAAGAGAAAGAGGTTGAAGGAAAGGGNGATGGATTAGAGAAGGCAAGAAGANGTTTTAANNGACTGAATTTGATCCTTCTGTTCCTTGTA…
Gma.6986.1.S1_at	CD396631	At5g23090	4e-57	Transcription	Transcription Factor	Unclassified	TTGCTGGCCCATGTGGATGTGCTCATTTGTATTCTTTCGATAAATCCATATTTGTAAGTCAATGTAATTAGTGAGAGATCATGAAAACCCTCCCGTTTAGCATTTACTTGTAATTATTTAATTTACGTTTTTGTATCTTCTACATACTAACAACTCCTAGCTTGATTCTGACAGTAGCTACTATGTTAGATTGTAACNAATTATTAAATATGTAGAAGCAATAGTGCTCTGTTTATTTGTTANNNNNANNAATACGGGAAATCTTGAAACTGAGGCATA
Gma.6848.1.S1_at	CD402025	At5g59140	2e-37	Transcription			GAAATCAGCGTATTAGTGTTGCCACTGAAACTATGTCCTTGCTGGAACTAAGTATATATGTAATTTGTATAATTTAGTGACTGTTAGACTCAGCTTGCAAGACTCTGATGCCGTCGATTGATGTTGCTGTATAAATCAACTGGTTTTAAAATTCTAATTTAATGGGAACATTACCATCTNCCCGATAAGGTAAATCATAATGCTCTTGTAATGTCCATTAACAATATAGACATTGTTATCCAAACAAGG
Gma.7212.1.S1_at	BE658102	At1g30970	3e-36	Transcription	Transcription Factor	Zinc Finger	GGTTTATTGTTGTACTTTGTGGTCTATAATTACCTGCTGATCATTATTATCAATTTATCTTTCAGATGAGCTCCATTGATGCAGCCATAGATAAGAGGATNCTTGAGAGNAGGCTGGCTGGTCGTATGGCATTTTAGATCAATCTCATCCANACANTCTTGTNAAATTTCTTCAGTGATANGGGCTCAAAATGGNATTTTAATAAGGCTTTGACAGCGTGTGGTCAAGATTCCTTTATTTAAGGTCCNGNAAGTAANNTTGTTATTGGTGCAATTCTTTGCCAAAATGGGCAATGGGCCCTACGGTNATNGTGGAATCGAAGNAAAAATATTGAAATGGTTCTGATTTCTTNNNNCTTAGGAAGTTGCAAAACTTTGTTTATTTCTCANTTTCATACCT…
Gma.7757.1.S1_at	BG510691	At5g06950	4e-87	Transcription	Transcription Factor	Basic Leucine Zipper (bZIP)	GGCTGACAATCTGCGGCAGCAGACATTACAACAAATGCTTCGAATATTAACGACCAGGCAATCNGCTCGNGCTCTTCTNGCCATCAGTGATTATTTCTCACGGCTGNGAGCNCTGAGTTCTTTGTGGCTTGCNAGGCCAAGGGAGTGAAGCATTTCACAGCNCCATTAGTGGACTTCTTTCATNCCTGACNCCCTTAAANACNNNTGATCNTTGAATCTTGTGCTCTGAATGAGTTCAATGGAAGCTGGTGTCTTTTGACAATGAATTCCTCTNGAAGCCTAGTTGTGNTGCTATAAACATTANATGCTANGATTTTTCTACTCTGCCAACTGCTGNTGTGGTGCAACANTTTTCTTTAAGCTTTTGTGGTTTTAAAATAGTCTCAATAATTTGATTAT…
GmaAffx.52970.1.S1_at	BU548330	At3g26935	8e-47	Transcription	Transcription Factor	Zinc Finger	GTGAGTTGTCTCCAGAAATTAGGACAACAGTNGACGAAACNAGTNACCGTGCCGGAATNCATCCCAGGAGATCCAGCTGGGGAAGAAAAAGTGGAAGCTGGGAAATGTCCCCTGAAGTTCTTGCTTTGGCAGCCANGGTTGGGGAATCAAATCGAATNNNNNNNNNNNNNAGCAGTTTGACCACTGAGAACAGGCATACATAGCCACTAAAAGTGAAATTAATAGTCTTGCAAAGGGTTTTNNNNGNNGTAATTAAAAGATGTTACATTTCTGATGCAGTAAATTATCAGGAAAATTATTTGTATTTGCAATATTGTGGGGGATGAAGGCTTTGGAGGGTGTTTGTTAGTGTCGTTTTAGCCATTGTGCTTCTAGGTTGGAATTGTTGTGTTGTGAGTG…
GmaAffx.52028.1.S1_at	BE023291	At5g20570	2e-54	Transcription	Transcription Factor	Zinc Finger	ATTCCGACGTGCCTATGGTTCCCGCCGGCGAGCCCTCGAGCAGCGCCGGTCCTTCTTCCAAGAAGCCCAAGCGCTTCGAGATCAAGAAGTGGAACGCCGTCGCTCTCTGGGCTTGGGACATCGTTGTCGATAACTGTGCTATCTGCCGGAACCACATCATGGATCTCTGCATCGAGTGCCAAGCCAACCAGGCTAGCGCCACTAGCGAGGAATGCACTGTGGCNTGGGGAGTNTGTAACCATGCTTTTCACTTCCATTGCATNAGTCGATGGCTCAAGACNCGTCAAGTTTGTCCTCTAGATAACAGTGAGTGGGAGTTTCAGAAATATGGCCACTAGAANTATGANGTGGTTGAGCTCCTNGGACATTTGGANNNTCTATCCTAGNTTTTGAANATTT…
GmaAffx.6478.1.S1_s_at	CA939014	At4g31550	9e-06	Transcription	Transcription Factor	WRKY	CGCCGGCGGGACTTTTGCCGCTCATCCTGTTTAAGCGACGGTGGATATCGGGAAAGTATGGCACCGACAGAGATGAGTGATAACCGCCGTTTGCAATTAACGGGGGGGAAGTTGTAACCGTATATTGTAACAGTGGGAGGAAAAGAAAAAAAAAAAAAAAAGAAGGGAACTTATTGCAAGCGAGGGAAAGAAAAGAAAAAGAAGCAAAGTCAACTTTTGCTATGTTTGGTTTGGCTGGGACCT
GmaAffx.67609.1.S1_at	BG551013	At3g05060	2e-59	Transcription	Transcription Factor	Unclassified	GGTCAGGCAGCTCCAAAGTTCAAGGGGAAAATTTCNCGGTCACTTGCNGCAAAGACGGCATTGGCTATTAGGTGTGATGCTCTTGGAGATAGCCAAGATAACACCATGGGATTGGAGAACAGAGCNAAGCTTGAAGCACGATTGAGGAACCTTGAAGGCAAAGAGTTNGGTCGTTTTGCTGGTTCTGCCAAGGGAAAGCCCAAGATAGAAGCATANGACAAGGACCGAAAGAAAGGAGCTGGAGGACTGATAACCCCNGCCAAGACATATAATCCTTCAGCNGATTCAGTTATNGGGCAAATGGTNNATTCTGCTATNGATGAAGATGCACAAGAGCCTTCTGTTGCT
GmaAffx.7874.2.S1_s_at	AW152996	At5g51190	2e-24	Transcription	Transcription Factor	AP2/EREBP	CTATGAGAAAAGTGAGTTTAACAACAATAGTAATAGTAATAAGCATGTGAAGAAAGAAGAGTGCCCTTTGACTCCATCATGTTGGAAAGGCTTTTGGGACACTGATGTTATGGGAACAATCTTTAGTGTGCCTCCTTTGTCACCACTATCTCCACTAATGGTTGTTTGAGATTTTGTGGAACTTTTGCTCTTTCAATGATGTTTTGAGGTAACCAAACTAAGGGGAGAGAGAGAGATGATGCTGGTGATTGTCCTCTCTGATTTAGGTTGCTAATTTGCCTAAATCAAAATGGTAGTACTAATTAATCTACTA
GmaAffx.21313.1.S1_at	BE611932	At5g24800	2e-34	Transcription	Transcription Factor	Basic Leucine Zipper (bZIP)	TGTTTTCTAATTAGGGTCATGCCAATGCTTATGGAGCATTTGGCTGAC
GmaAffx.1785.1.S1_at	BF325331	At3g61890	1e-48	Transcription	Transcription Factor	Homeodomain	TCTAATGCAGAAGCCAATGGAGCCANGTCAGAGATGCACACAAGTTGAAGCAGCAAACAGCATGGACAGTGAATCAGAAAATGGAGGCACCATGAAATGTNAAGCTGAGGGAAAGCCAAGCCCATCANNATNGGAAANATCAGAACATNTACTTGGTGTTCTGTCTGATGATGACACNAGCATAAAGGTGGAAGACTTTNNCCTAGAAGATGAACATGGCCTTCTGAATTTTGTTGAGCATGCTGATGGTTCCTTGACTTCACCAGAAGATTGGAGTGCTTTTGAATCCAATGATCTATTTGGCCAATCAACCACTGATGATTACCAATGGTGGGACTTCTGGTCCTGAATGAAACAG
GmaAffx.34274.1.S1_s_at	AI938265	At4g24440	0.0002	Transcription	Transcription Factor	General	AAATTGTTGTCATCTGCTGGTACTATGGAAATGGTGGCCAGACCATAGTTACAATGGTCTTAAATTCTTGCCGGAACTAGCAACTACTGTATGTTATTATAGATTTAAAAGCCATCAGTCTTCATATCATTAGGTAATTAATGATGCTATATTGAGAATACCGCTTGGGAATTGGATGAGTCTACTCTCTTCTTTTAAGTGTATTCTGTTCTA
GmaAffx.3568.1.S1_at	BU964411	At1g42990	3e-22	Transcription	Transcription Factor	Basic Leucine Zipper (bZIP)	TCTTGTTGGAACCTCTGCTGTTGGGTTCCCTGCTGTGGTGCATGGGCATCATATGCCATCTCAGTCTGCCTCTAATGCTGTGGGTTGCAGCAGTACTTCCAAGAGAAAACATCGAGCAGAAGGGCCTAAGAAGGGTAACTCAAAAAGGATCAGAAAGTAAGATCTCTGAGTGTTTCCAGATGCAATCATTTTTAAAGAGTAGAAAAAGCCGAGCTTCAAGAACAAAGATGAAATTCAATTTTATAGTGTTCTAATGTTCTATAACTTCTGAAGTGGGGGCTCTAAGGTTTTCTATTCATCTCTTCTTTCTTTCGTTCGTTTTCTCTTTTGTTTTATTGGATTTATAAATACGGTCGAACTTGTTAGAGGTTCTGTGATATGCTTTTTTAGGTGCTGTTC…
GmaAffx.42667.3.S1_at	AW306785	At1g21450	1e-24	Transcription	Transcription Factor	GRAS	GTTGTCGATGGCTGGCTTCACTCCATCTCCAATGAGCACAAATGTGAGAGAAGCAATTAGGAATCTCATTATTAAGCAATACTGTGACAAGTTCAAGATAAAGGAGGAAATGGGGGGTCTTCATTTTGGGTGGGAAGACAAAAACTTAATTGTTGCTTCAGCATGGAAGTGACCAATACAAATTCTTTTGTTGCATGAGACTCATTGTAGTGTTGATGTAGTATAGTATTTGTTTGCTTGTTTAGTCTGTATCTGTTATGTTTACGCTTGGTTCAGACTCAGATGTATACTAACGTGCAACTTATGCTAATACAAACTTTCATGTGTTTAACGTGGATGAAAGTCAATGGAGCATCTGACAACATCA
Gma.8550.1.S1_a_at	BM092281	At5g64610	0	Transcription			AAAGCTGAAGACATATTAACCACTCTGCAGAGCCTAGAATTGATTCAATACAGGAAAGGTCAGCATGTTATATGCGCAGATCCGAAAGTGTTGGATCGCCATCTTAAAGCTGCTGGCAGAGGGGGCCTGGAGGTTGATGTTAGCAAACTGATCTGGACTCCTTATAAAGAACAAAGTTGATGGTCATTGGTCATATCCATCAAGGAAATACTATGATGTGATGTAACTTGTGCTTTTGTGTATAAAGTATATGTAGGNTAGGTTTCTTGGACAAACCCTTTGATGTATTAGTCTTTACAAATAAGATTTAATACATTTTAAGATGAGAATAGGAACATAACTGATTGTTTTATGTGCTGAACCGTAGCC
GmaAffx.90574.1.S1_s_at	CF806299	At3g20770	5e-42	Transcription	Transcription Factor	Unclassified	GCTTGCCATCATCAACCAAGAGGAAGCCTTGGCTAGAGAGCTTTACCCTGACTATTGCCCTCCATTTTCCTCTGCTGGAGGTAATGGATCCTTGGTGATCAATGATTGCAGCGAGCATGATGTTGATGGGGCCGAAGAAGAGCTGAACTTTGATGTGGAGGACCGGAAGCCTGACCATCTTCTTCCATCACACCTCGGGATGGAGAGAATGAGGGGAAGGATGCCAATTCAACAACCTTCTCATCCAATGAAGGGAGATGGTGTCACAAACCTAGATTTCATCCGGAAGAGGAAGATTTCTAGTGACTTCAACATGATGATGGATCAGAAAATATACACATGTGAGCATCCCCAATGCCCTTATAGCGAAGTTCGCCTTGGTTTCCATGATAGGTCTGC…
GmaAffx.89113.1.S1_x_at	CK605611	At2g36830	8e-72	Transporter			CGGCCCTCTCATCGGAGGTGGAATTGCTGGGCTTATCTACGAGGTTGTCTTCATCAGCCACACCCACGAGCAGCTTCCCAGCACTGACTACTAGAGGGGAAAAATGAAATAATAAAAAAAAAAANNTGTGTATTATTGAATTTCTCCGGAATCTTCTTCTGTGTATGGTTTTCCTTCCTTTGTGTTTTCTTTCCTGTTGAATCGGTGGCCGTTGATCTTTGGTTGGATGGTTGATGATCCTGAAGTTTTCTTTTAAGTTAATTTAATTATCATTTNNNNCATGCTCTCGCTCTCACCTGGTCCACAATTGAATTGAATGTATGTATCATTATTCGGGTCTGGTTGGTTGTACCATTTCACTAGTACTTCTTACTTTTTCCGGTATCCTCTG
GmaAffx.92730.1.S1_s_at	CF808455	At5g40780	0.0002	Transporter			GGACTACAAGTTCTACTCATAAATTCATTCCTAACTGAGTCAATGATGGGAATCTGAAGCATGCAATTGCAAATACAAGAAGGGAATGAAAGCTCAATAAAAGTCATATGTGTTATAGAATCTGGTTTATCTTAGGTCGCTGGGTGCTTTAACTATAGAATGCAAGAATGCATTGGTTGAGGAGGATCATCTGCAACTTGCTTGTTAGTGGAA
GmaAffx.10989.1.S1_at	CA851637	At5g43360	7e-24	Transporter	Inorganic Solute Cotransporters	Inorganic phosphate transporter family	ATTTGGGTTCCTATATGCTGCACAAAGCAAGGACCCTTCCAAGACTGATGCAGGGTACCCTACTGGTATTGGGATTAAGAACTCACTCATTATGCTTGGTGTGATCAACTTCATTGGGATGCTATTCACCTTGCTGGTTCCTGAAGCAAAGGGGAAATCACTGGAGGAGTTGAGTGGGGAGAATAATGAAANTGATGCTGAACATGCAGTGTCTGCTAGGACAGTTCCTGTTTGATTCAAGTTAAGTTTGTGTTCAACAAAGTGGTTCGAATTAATTGTGATATTTGTACATTTAAATACTTGGTTTTGGTTGTGATGTGTTTACACCAATGATGTAGTAGTTGCATGGTTCAGGGTGCTGGTGCTTTAATGCAATTACAGTTTCTATGCTTTTCGTTC…
GmaAffx.15945.1.A1_s_at	AI461043	At4g35100	5e-35	Transporter			AGCACCACTTCCCATTGGGTTTGCCGTCTTCATGGTTCACTTGGCTACAATCCCTGTCACTGGAACCGGCATTAACCCTGCAAGGAGTTTCGGACCAGCTGTGATCTTCAACAACGACAAAGCCTGGGACGACCAAGTAAGTAAACCTTAACTTTTGGACAAATTAAGGTTTATTTTTTACATGAAAAAATATATATATTTGTTAACACCAATAACATATGATTGTGATTGTTCTTTTTAGTGGATTTACTGGGTTGGACCGTTTGTTGGAGCTGCG
GmaAffx.85761.1.S1_s_at	BE658257	At5g05820	1e-141	Transporter			AAAAGCGAAGCAAGTGATACTGATGNTGTNNGTCATTCATGATTCTGTGGAAATCAGCAGTGAANTCCCTATATTTGTTTTCATNNCTGTGCGGACAACCTCCAGATACCATGAGGNCAAATTTGNTATCATGATTATGACCAGAATGTTTCAGACTCTATATAAATTTTTGGCCCTACATGGAAAAACGGGTTCCCCATTGTATTAGTACCTGTGCAGAAATAGCCCACAGTACAAAGTTTCAATAAGTGACTGATCTCTCTAATATATACCCATGTTGGCATATAATCGAGGAATGTCTTTTTGTCATTTATTCTTTGAAGAAAGAGTTGTAGAAGGATCTCTACTCATTTGTTGTTTACATTGCTTACATTTATTTATTGATGATAAAATTTGTAT…
GmaAffx.52860.2.S1_s_at	AW309114	At2g47490	7e-30	Transporter			ACCAGCTTTGAAATGATACACCGATTTCTTGTTTCCCTTTTTCCTTCTGATCCACGGCCTCATATTTTGTGACGATTGATCTTGGTGGTCATCTGTCTTCTGTAGCAGTTAGATTCAAAAAAAATATGTTGTTTGCAGGTTGTACGTTCCAGATTGCAAGAACAAGGGCATCATTCGGAGAAACGGTACTCTGGTGTGATTGATTGTATTAG
GmaAffx.56721.1.A1_s_at	CD391726	At4g32530	5e-07	Transporter			TTATGTCAGCTCAAGCAACATGGCCGACAAAAGTTTAGTTTCCCTTGTATCAGAATGTGGTGTGGGAATGCTATTATGGTAGAGTGCTATATATCCTCTGCACTGCCCGGGATTAAAAGTTTTCTCTGTTTCCTGTTGGTAGAAATGTAAAATCCAGCGTAATAGTTTGCCTCCATTACAACATTAGGCTGTATTATTTACCNATGAGTTGTTAGGTCTTGTGTATCATCAGATATATCTGTCTGTTGGTTGAATTTTAATATTCTTGGAGGACTAAATCTTTCATTAATCA
GmaAffx.47230.1.S1_at	CA820051	At2g38120	5e-72	Transporter			GAGGGTGGGCTAGCATGACAAACTTNNTCAAACAGGTTGACACATTTGGACTCTTTGCCAAGTGCTACCANTGCCCGCCAAAANTCCCNGCTTCCAACAACACAANGCTGCATCATTGAAAATTATATATNNGTTCTTNTGCNTNANACATATAGGGACACATCAGCATCTNCACCNTTGTGTATTTCCCCTATCTTTTNGTTTAATCTCNCTNNNTATAAATATTGTTNATGCTGATGTTCCCTTGTGTAGNAAGGCAACATTGTTATATTTCGCTTTCGAATCATNNTGGTTAATCATAANCATGCACTATAGTTATAGCATATGTAGGGANNGNTGATGTTTGGCAATTGGNATATAGCGACCTCAAGTATAGCCTGCATGTTTC
Gma.7643.2.S1_at	BG157292	At5g60790	0	Transporter			ACATACCAGTGGATGCTCTTTTCATTTTACACCTTATTTTCCTCCTAACTCTCCATCCTCTAAATTTTAAACATCCCTTCTATATTTCCTGTAATATCTCTTCTCAGTTTCTATACCACTTAGCAGGTTTTGTTTGGTTCCAAGGAGGGGGAAAGAAATTTAATGAGGGAAGGAGATAGATTTTAAATAAACATTCTGTTTGTTTGCTTGAGG
Gma.6664.1.S1_s_at	L12257.1	At2g36830	1e-93	Transporter			TTCTCCGGAGCAGCCATGAACCCTGCTGTGACATTTGGGCCTGCTGTCGTGAGCTGGACCTGGACCAACCACTGGATCTACTGGGCCGGCCCTCTCATCGGAGGTGGAATTGCTGGGCTTATCTACGAGGTTGTCTTCATCAGCC
Gma.585.1.S1_at	AB016063.1	At5g14040	1e-136	Transporter			CAGCTCCTGGTTCTGAGCTAGCAAAGGCATAGAATGTCCAATGATGACAAGCAACAATGTTGTACGAAACTTAGAAAGCCAGTGAATAGGGACCATAAATAAATAGAGGACTGCTGAATGAAGTTGCTTGAGTGGAACTCAAGCTTGGTTGGATAATATTCTTTTAAAGTTCAGACATTGTTTCCANNNTNNTTNNNTNTNNNNNNNNNNNNNNCNNTNTNTNANNTTTAAGTATTTTGAATTTTTGGGAGGATGGTTTTGCTCTCATCCTTCCACTTGCTGAAAACTTNGTAGGTAGGAATGATATAATTTTGCATGTTAGGTTCTCTACATGCCAATTGTCAAACGGGAACACATTTGTTTTCTTGTCTGTGCATAAGCACCGACACATATGCAATG…
Gma.6456.1.S1_at	BG509157	At3g01280	1e-109	Transporter			GAGGTAGACACCAAGGCCATTGAAAAGAGTGCTAAGGTTGGATTGNGTTTGGTTCTCAAACCCTAAGAATTTTGATCCATCCTGGCAAGAGCATTGAGTAGGTGTTAGGAANCGTATAGTCTGTNAGACTAAATTATTTCCTTGAAGTTGGTTCTCTTCNTGGGTAAGAAGTNTTCATGGAGTTTTCGTTGCATTTGAGCAATTCAACCTTGTAAAAATAAATAGGCTTTCNATAAACCANATGTNACTTTTNAAATGCCCAAAGCTTAGCAAGCCTCTTTTNTTGAATGAGGATTGGCACTCTTTATTGA
Gma.6525.1.S1_at	CD413671	At5g50460	2e-18	Transporter			AGATCCAAGCTTGGGAGACAGAGAAAGAGAAAGAGAATGGACGCCATTGATTCTGTGTTCGATCCGCTGAGAGAATTCGCAAAGGACAGCGTGAGGCTCGTGAAGCGCTGCCACAAACCCGATCGCAAAGAATTCTCCAAGGTTGCCGTCCGTACTGCAATTGGTTTCGTCGTGATGGGATTCGTCGGTTTCTTCGTGAAGNTCATTTTCATTCCAATTAACAACATCATCGTCGGATCTGGTTAGGATGAAGGGAACTACAATTGCCTCAGAATTCAGGTTGTCAAGCAAAAGGAGGTAGACAGAGTTCCCACATCAATAGATCATTTTATGCCCCCAATCTTAGTTCTGTTTTCATTTTTGTTTTTTCTTATATCTGGAAGCGTTACTTTAGATGTA…
Gma.4927.1.S1_at	BG510284	At4g15236	2e-79	Transporter			CCTAAATGGTGGGTTTGGTGCTACTGGATTTGTCCTACTGCTTGGTCCTTGAATGGCCTCCTAACTTCACAATATGGAGACATAGAGAAGGAGGTACTCGTATTTGGGGAACGAAAATCAGTTGGTTCCTTTTTAAGAGATTACTATGGCTTCCGGCNTGACAGATTAAGCCTTGTGGCTGTGGTGCTCATTGTGTACCCAATTGTCTACGCTTCTCTGTTTGCCTATTTCATAAAGAAAATGAATTTCCAAAAGAGATAAGATTGACACAGACAAAGACACAGTTTGGTTCTTCTGC
Gma.4366.1.S1_at	AW349728	At1g75270	5e-94	Transporter			TCTCTAATCACTCCTCCTGAATTTGCCTCCGTGGGATCAAAGATATTTGGGTCTTTTGTGAGTTTTCTGAAGAGCAAGGATACAAACGATGGAACTGAGCAAGCATTGGTTGCTGAATTGAGTGCCTTGGATGAACATCTCAAGACCCATGGTCCATACATTGCTGGGGAGAAAGTCACTGCTGTTGATCTGAGTTTGGCACCAAAACTGTACCATCTTGTGGTAGCACTGGGCCACTTCAAGAATTGGAATATTCCAGAAAGTTTGGTACATGTGCACAATTACACTAAGCTGCTGTTCTCCCGAGAGTCAT
Gma.4379.1.S1_at	CD393195	At4g11150	2e-91	Transporter			TGCTGGATTCAGCTGCTCAGGAGTATGCTGAGAAAGCAAATGTNGATCCCCCAGAGATCATTGTTGACAACCAAGTCTATCTTCCACCTGGACNCANTCNTCACAATTCTCACGATCTCTACTGCTCCGGTGGGGTGGTGTTGGCTTCTCGTGATGGAAAGATTGTGTGTGAAAATACTCTTGATGCACGTCTTGATGTAGTTTTCCGTAAAAAGCTTCCAGAGATCCGAAAGCAGCTCTTTGGACAAATTGTTGCTTGAAGATTTTGATTGTAATGTTTGGTTACCCCTGGAACTATATCCCGAAGCATAAGCTTGTCTTCATGTCTTGGACCTGAATAGCTATCAAGCCATTGCTTCTGTGAACTTATAATTATTGTCCCTTAAATTACGTCATT
Gma.4379.3.A1_at	CD392760	At4g11150	1e-22	Transporter			TGTATTGTTTGGTTACCGCTGGAATGTTAATATCCCAAAGCAAAAGCTTTGTCTTCATGTCCTTGACCTGA
Gma.4379.3.A1_s_at	CD392760	At4g11150	1e-22	Transporter			TTGTCCGGTGTTCTTGATTTGATTTACTTCTGATTGTTATGACCTAAGTTTTTCCGGCTTATTTCAGCTTTGAGCTTCTTGGCAATAAAGTAGCAAGATGTAAACATTACTGTT
Gma.4379.3.A1_x_at	CD392760	At4g11150	1e-22	Transporter			ACTTGATGCACGTCTTGATGTAGTTTTCCGTAAAAAGCTTCCAGAGATCCGAAAGCAGCTCTTTGGACAAATTGTTGCTTGAAGATTTTGATTGTATTGTTTGGTTACCGCTGGAATGTTAATATCCCAAAGCAAAAGCTTTGTCTTCATGTCCTTGACCTGAATAGCTATCAAGCCATTG
Gma.5793.4.S1_s_at	BI967780	At4g00430	1e-141	Transporter			TTGCAGCACTCTACCACCAGGTCGTAATCAGGGCCATTCCCTTCAAGTCCAAGTGATTCAATCAAA
Gma.5793.4.S1_x_at	BI967780	At4g00430	1e-141	Transporter			CTTGCCAATTGGGTTCGCTGTGTTCTTGGTTCACTTGGCAACCATCCCCATCACCGGAACTGGTATCAACCCTGCTCGTAGTCTTGGTGCTGCTATCATCTTCAACAAGGACCTTGGTTGGGATGAACACTGGATCTTCTGGGTGGGACCATTCATCGGTGCAGCTCTTGCAGCACTCTACCACCAGGTCGTAATCAGGGCCATTCCCTTCAAGTCCAAGTGATTCAATCAAACGGTTCATGCTTAATCAAGTTGGGAACAACAACAACAACAAAAATCAAGCCAATGTTTGTGGGTTTTGGTTTCATTTCATTAAGATGATCTGTTTATCTCTTTTCTTCTTTTTAAAATTTAAAGTCTTTGTATTTTGTATGTAAAGATGTAAAATTATGATTATTA…
Gma.5793.7.S1_at	CD415356	At4g00430	1e-142	Transporter			GGCACCTTTGCCTATTGGGTTCGCGGTGTTCTTGGTTCACTTGGCAACCATCCCTATCACCGGCACTGGTATCAACCCTGCTCGTAGTCTTGGTGCTGCTATCATCTTCAACAAGGACCTTGGTTGGGATGATCACTGGATCTTCTGGGTGGGACCTTTCATTGGTGCTGCACTTGCAGCACTCTACCACCAGGTCGTAATCAGGGCCATTCCCTTCAAGTCCAAGTGATTCAATCAAACCGTTCATGCTTAATCAAGTTGGGAACAACAAAAAAAATCAAAACAATGTTTCTGGGTTTCGGTTTCATTTCATCA
Gma.5793.7.S1_x_at	CD415356	At4g00430	1e-142	Transporter			GGCACCTTTGCCTATTGGGTTCGCGGTGTTCTTGGTTCACTTGGCAACCATCCCTATCACCGGCACTGGTATCAACCCTGCTCGTAGTCTTGGTGCTGCTATCATCTTCAACAAGGACCTTGGTTGGGATGATCACTGGATCTTCTGGGTGGGACCTTTCATTGGTGCTGCACTTGCAGCACTCTACCACCAGGTCGTAATCAGGGCCATTCCCTTCAAGTCCAAGTGATTCAATCAAACCGTTCATGCTTAATCAAGTTGGGAACAACAAAAAAAATCAAAACAATGTTTCTGGGTTTCGGTTTCATTTCATCAAGATGATCTGTTTATCTTTTTTTTTTTNAATTTTAATTTAAAGTCTTTGTATTTTGTATGTAAAGATGTAAAATTATGATTATT…
Gma.3397.1.S1_at	BQ627985	At2g47800	1e-162	Transporter			TCAAGAGTATGCCAACCGTTCCAGTGGCCTATAAGAAAGTTCCATGCATGTGTCTCTCTCAGCCATTCAGACAATAACAGAAAACCAAACTTAGGCTAAGCCTTTTAAGTTTTGATTGATCTTCCAAGTGCCACGAGAAAGGAGAAAGGCATTTTACTTTAGAGAGGTGCAATTACCATCCTGCATAATTGCTGTTTGGACAAGTGAAGAATGAGCAAACCTTGTGAATGGTTTTTCTAATTACCTCTGGCTTAAGTAGCTCTAGTATACAAACAAAATATAGCCTTTTTTAGGTCCTAATTTATATAACACAGTGCCCAGTGTACAATTACACAGTTGCTCCACTGCCTTTATATTGAAT
Gma.3539.1.S1_at	BU760870	At3g47420	1e-91	Transporter			GAGTGCTGTTTTCACAATGTTGATGGCAGCAGCTTTAATTGCAGGGCTGCTTTTGACCAGGCTAGTAGTGTCTGAGGTGGCCACAAAGATTGAAGAGTCAAGGTATAATAGAGCACAAGACTGTTCATTCAATGTATAAGAATAAACCTAAAGGGTCACAGTAATGTTATGTTGCTGTATGGGTAGTGTAGGAGTGCCTATAAATTCTCATTCACAGCTTCACTTCATTAAATTAAAGAGAAGCATGCCCAACANTGTTTATATGGAGAGGGCATCTTCAACTTTTATCCTTCATAATATTAGTGAGCAGATTGAGATGTTGTCTGTTTGTACATTGTGTGATATACCCAATTACCAAATTACCAATTNTAGCATAGTATCATCCCTACACACAAGCTA…
Gma.3672.2.S1_at	CD407926	At1g34130	1e-148	Transporter			GTTACAGGTTTATGACTTTTTGTCAACTTCCCAACTTAACCTATTGGCTTGGTACCACTTGTTTGACACAAATTATACAAGGTGGCCGGAATAGAACTGTGTAGAAACTAACTGAATCGTACAGGAGTGGCCAATAGC
Gma.3262.1.S1_at	AI960141	At2g38940	1e-120	Transporter	Inorganic Solute Cotransporters	Inorganic phosphate transporter family	GTATGCTGCACAAAGTACGAACCCCNANAANGTTGATCATGGTTACCCAACTGGTATTGGGGTTAANAACTCCCTCATTGTGCTTGGTGTGATCAACTTCTTTGGAATGGTATTCACCTTGTTAGTACCAGAATCAAAGGGAAAATCACTGGAAGAGTTGAGTGGGGAGAATGAAGATGATGGTGCTGAGGCTATAGAGATGGCAGGGTCTGCTAGGACGGTTCCAGTTTAACCAAAGTCTCTGATCAACAAAGTACTTAGTTCATAATTCTAGTGATGCTATTATTGTGTGACAATTTTACTTCGGGTTTTCTACAGCTAGATGCTCAATAATGATGTAGATATATGTTTCTCGGTGCTGTCTGTAACTTTAAATCAATTACAAAGTGCGTGTATTTC…
Gma.2372.1.S1_at	BM143592	At2g38940	9e-27	Transporter	Inorganic Solute Cotransporters	Inorganic phosphate transporter family	AGCAAAGCAGATGCAGGGTACCCTGCAGGTATTGGTGTGAAGAATGCACTTATTGTCTTGGGTGTGGTTAACATTTTAGGCTTCTTCTTTACATTCTTGGTGCCTGAGGCAAACGGNAAATCATTGGAGGAGATGTCAGGTGAGAATGATGAGGATGTTGGAACCCAGGAAGAGTCAGAGCAATCACATTCTCANAACAACAATAGAACNGTTCCATATGTTTAGGATATGTTTATCTGTAATNTTGTTATANNNNTAAAGTAGTNGCTTCAANNNTTAGGCTTGGAAAGCACAAAAGCTTTCCNTGCNCCNCTNCAATATTTCTGTTAAATTTTGCCNGAACAACATNTANCAGGAANNANNAGATATTTGTTCTACGAATATTGGCAAATTTGAGTT…
Gma.16738.1.S1_at	AW349444	At4g38510	1e-172	Transporter			AATTGATGATTAAGCAAGCAAGTTCNTATACCTTGGTNTCCTNCTCAACCANTGNCTACTGTCATCAGCAATTTATTTGTTTCTTTGCTTTCTCCCCCCCANNNNNNNAATCCACATTTCTTCTATGCAGCATAAATATAATAAANGGATTGAGTNTGTTTGAGNNCCTCATATTTTGAGTNGGTCGGTNAGTCGGAAAGTAGACCCCATAGATGNTNTATGATTCCTGAGCCATTTTTTCTTTTGGNNGGGGAAAATGAGTTGTGTTAGTTTGGGATGGNGTCGATTGCNTTGTGGGATGTTNATATTCCCTNCTGTNNGAATTTGTGGACACTGCCTTCCCAATGTATGTTGCTTGTTTCATA
Gma.16869.1.S1_at	CD404511	At4g39080	1e-21	Transporter			ATGTAACTAGTCAGTGATCGGTATATGTGGGCATTGTATGTGGTGGAATCCTGGGAGCTTTTTCATCAAACGTGGTGCCGTTTTGTTTATTTATCCATTGAGGAAATAAATATTCTCAATTANGGGGAGTAACTTTGTATGAGCTAGGCAACCGTGTCTGCGTGTAATAATTATAA
Gma.16142.1.S1_at	AI856140	At5g50460	3e-22	Transporter			CTCAAATCCAAGCTCGGGAACAGAGAAGGAGAAAGAGAATGGACGCCATTGATTCTGTGTTCGATCCGTTGAGAGAATTCGCAAAGGACAGCGTGAGGCTCGTGAAGCGCTGCCACAAACCCGATCGCAAAGAATTCTCCAAGGTTGCCGTGCGTACCGCAATTGGTTTCGTTGTGATGGGATTCGTGGGTTTCTTCGTGAAGCTTATTTTCATTCCAATTAACAACATCATCGTCGGATCTGGTTAGGATGAAGGGTACTACAATCGCCTCAGGAATTCAGGTTGTCAAGCAAAAGTAGGCAGAAAGAGTTCCCACATCAATAGATCATTCTATGCCCTCAATCTTAGTTCTGTTTTCATTTTTGTTTTTTTTTCTCATCTCAGGAAGTGTTACTTAC…
Gma.16024.1.S1_s_at	CD415233	At2g43330	3e-87	Transporter			ATTTACCTTATCGACCATGCTGGACGAAAAAAATTAGCTCTTTCTAGTCTGGGAGGAGTAATTGTATCTTTGGTCATCTTGGCCTTTGCATTTTATAAGCAATCATCCACGTCAAATGAGTTGTATGGATGGCTTGCAGTTGTAGGCTTAGCCTTGTATATTGGTTTTTTCTCGCCAGGAATGGGGCCTGTGCCATGGACTCTGAGTTCAGAGATATATCCGGAAGAATATCGAGGTATCTGTGGGGGCATGTCAGCTACTGTGTGTTGGGTCTCAAATTTGATTGTCTCAGAGACCTTTCTTTCAATTGCGGAGGGTATAGGGATTGGTTCAACTTTTCTGATTATTGGTGTCATAGCTGTGGTTGCATTTGTATTTGTGCTTGTTTATGTTCCAG
Gma.1802.1.S1_at	CA935681	At1g67300	8e-79	Transporter			GAAGCTCAACGCAGGAACTATGCATTGTTTTGCTGCAATATTTGTACGAAAGAGGTTTAGGTATTATGGCTAGCTGTGATGTAGTAGGTGGTACTATTAGCGGCTTACTTACGACACGACACCCTTCTGTTGTTACTCGAGCCTTGTGATTCTCTGATTTGGCATCCACTTAAAGGGAGACATAATTCATCAAGGGGGATCTATGCATCCCATAATATTTCCTTAAATGTACTACTTTANGTAATATTATATACGNTNCTGTACGTGACATTATTTTTAATCGCTTGAATTTTGTCCCATTTTGGATACGAAGTAGTCTAGCGTGTAAATTCTGTCTGCAGAGTTTATCGATGGGCGNAAGCTTCGTGAGCTTAAGAAATAGCTATGATCCGTAATTCA…
Gma.18030.1.S1_at	CD396158	At5g05200	1e-129	Transporter			AATGGGTGCTACAAACCAGGATGTTGATGCTAAGGCCTTTGCAAGAGATTTGGAAAAAGTATTCTCATCAATTAAGGAATTGGACACTGAAATAGTTGTAGCAACTACAACTGGAACAGCCACAAATGCAACTGCTGTTGCTGCTAATATAGTTGTTGATGAGAGGCAGATGAATGCACTCTTTCTTGATGTGGTTCGGGTTAGTGAATCATATGGATTGAAGTTTCCTAGAGAATTTGCTCTTCTCCTGAAACAGCTCTTGTACTTTGACCGGTACACACGGTTGCTGGCTCCCAACTTGAACATGCTTCAGGATCAGAGGATTTCCATTGCTTCCAATAGCAGAAGCAGGGTATAGAGNACAATTTTTAAGGAGTTGGTACACAAAATCTAGATGTA…
Gma.10928.1.S1_at	AW350612	At5g62890	0	Transporter			GTATTAGGCTACTCCATCTTCATTGGCTTGTCTGTGTCGCAGTACTTCAATGAGTACACAGCAATTAATGGTTATGGTCCNGTTCACACCAAAGCAAGATGGTTCAATGATATAATCAATGTCCCNTTCCAATCAAAAGCNTTTGTTGCGGGTTGTGTGGCATATTTCTTGGACAACACACTACANAAGAAGGAAGCTGCTATTNGGAAAGATAGAGGAAAGCATTGGTGGGACAAGTACCGTTCCTTCAAGACTGACACAAGAAGTGAAGAGTTTTATTCACTGCCTTTCAACCTNAANAAATACTTCCCATCTGTGTAACTGTGCAGCTTAACTAATAAAAATAGGGGGTTTCATTTCNTCCAAAANNNNTGAGTCACNAGAGTCTCTGANNGGTCG…
Gma.10954.1.S1_s_at	BU551388	At5g26340	1e-114	Transporter			GTGAGACTTTCCCATTGGAGACTCGNTCCGCTGGTCAGAGTGTCACCGTTTGTGTNAACNTGCTCTTCACCTTCGTCATTGCACANGCNTTCCTNTCTATGCTCTGCCACTTCAAGTTTGGNATCTTCTTGTTCTTCTCTGGCTGGGTCCTCGTCATGTCTGTCTTCGTGCTTTTCCTGTTGCCNGANACNAAGAATGTCCCCATNGAAGAGATGACCGAGAGAGTGTGGAAGCAGCATTGGTTCTGGAAGAGGTTTATCGATGATGCCGCNGATGAGAAAGTAGCCNATGTCTCTAATGGTAATGGATTTGATCCAACCTCCAGGTTGTAAATCNATTTGCATTGAGTATTTTAGACTCTAG
Gma.10964.1.S1_at	AW277625	At1g07810	1e-125	Transporter			GTTTTGGTTGTTGCACTTCCGGTCATTCTAATTGACGAGATTCTGAAATTTGTGGGGAGGTGTACAAGTTCTCGAGCATCAAGTGCAAGAAAATCAAAGCAAAAATCAGAGTAGACGNTTTACTGTAGTNATTAGNAAAGTTGCTCAATCCTTCAGCGACATGNACGATATNATATTAGAGACTGAAGAGGTGGCNTCAACGNCAATTAATCTTAAGTTAGTGCTATTTTAGGCCTTTCTGTAGTCTTCCATCCCATTTTATAATNNGGGATGGCCGGGCTTGCATTGGGTGCACTATATGTTGNTTTTTTTTTAAATCTNTTATTATCCTTTTGCCCCTTTTCTTTGAACATTTTAAAGATATTCACNAAANNAAGGGAAAAACCTTNNANNNNNNNA…
Gma.11024.1.S1_a_at	BG651255	At4g17340	1e-71	Transporter			TCTTCATTGGTTCCTATGCCCCTGTCCCAGCCTCTGAAACCTACCCTTGAGCTTCAACTTCACTTGTGTGTTCCTTCAAGTTTCATCTCTGTTCACCGTTTCATGTCATGAGCCTCTTGGCTTCTTGCATTTTAAACTCTACT
Gma.11024.3.S1_at	CD396280	At4g17340	4e-85	Transporter			TTTTAACTGTACCTTTATCTATTATTCACCGCT
Gma.11024.3.S1_s_at	CD396280	At4g17340	4e-85	Transporter			CGTCTTCATTGGTTCATATGCGGCTGTCCCAGCCTCTGAAACCTACCCTTGAGCTTCAACTTGAAAAATATGACTTCTTGTTCTATTCACTTGTGTGTCCTGTCCCTTCAAGTTTCATCTTTGTTCCCCGTTTGATGTCTCGAGCTTCATGGCTTTTTGCATTTTTAACTGTACCT
Gma.11144.1.S1_at	BE820412	At4g38920	4e-58	Transporter			CTCTCTATGGTCTCATTGTTGGTATTATCCTGTCTTCACGTGCTGGTCAGTCTAGAGCTGATTAAGAAAGATGTGGCTGCAAAATATTCTTTGATCTACCATCTGTTTTAACCTTCTTATTGTGAAGGCAAGGGGGGTAAATTGTTAGTTGTGAGGTTAATGATGTTGGGATACCACTTGCAAGGTTTAACAAATGTGAAAGCAGTTGCTGCATCAGTCATTTTTGTGTTTGTATAAGTAGTCTTTCTTTGCTTAATAAAGCTTTTTAAGCTTCTTTTTCCCTATGTGCCATATAATTCTTAATCTTCCCTTTTTTGGCTGCTGCCATTGTAA
Gma.11130.2.S1_at	CD412118	At5g60660	1e-116	Transporter			TCAGGAGCAACACTTAATTAATAATCTCCACTACCTAAATTATGATCATTTGTCCTGTGTCACCCAAAACAATAACAGTGTTTCAGTTCAATTCTTGGAGTTCCTTCCTTTTTGGCTTTTCTGCTTACCCGTGGGTTTGGGGCAAAAGCCAAATACCGTGGGTTTGGGGCTCTTGAAT
Gma.11175.1.S1_at	AW349743	At3g18280	2e-25	Transporter			GTTCAAGTGTCAAAGGCAGTGACCTGCAGCCCAGTGCAGCTGAGTGCATGTGTGAGTGCAATAACCTCTTCAACCCCTCCATCAAACCTATGCTGCTCCAAGATCAAGGAACAGAAACCATGCCTTTGCCAATATCTCAAGAACCCCAATCTCAAGAAGTTTGTTGACTCTCCTAATGCAAGGAGAGTTGCTAACACTTGTGGAACTCCCTTCCCAAGGTGCTAAGGTGTTACTAAATTTGAAGTGGTTTTAATTTCTCTGCCTGATTATGCATCTTGATATCTATCCATGTGTTCTGGCCAGAGACCAGAGAGTGAAAGAAATTATATATATATGTGTTATCATATATATATATATATATATATATATATANNNNNNNNNNNNNNNNNNNNNNCNNNN…
Gma.11175.1.S1_s_at	AW349743	At3g18280	2e-25	Transporter			TGCAGCCCAGTGCAGCTGAGTGCATGTGTGAGTGCAATAACCTCTTCAACCCCTCCATCAAACCTATGCTGCTCCAAGATCAAGGAACAGAAACCATGCCTTTGCCAATATCTCAAGAACCCCAATCTCAAGAAGTTTGTTGACTCTCCTAATGCAAGGAGAGTTGCTAACACTTGTGGAACTCCCTTCCCAAGGTGCTAAGGTGTTACTAAATTTGAAGTGGTTTTAATTTCTCTGCCTGATTATGCATCTTGATATCTATCCATGTGTTCTGGCCAGAGACCAGAGAGTGAAAGAAATTATATATATATGTGTTATCATATATATATATATATATATATATATATANNNNNNNNNNNNNNNNNNNNNNCNNNNNNNNTGTGGTTTAACGTCTCTATA…
Gma.11242.2.S1_a_at	BQ298655	At5g19760	1e-128	Transporter			GTTGATTGTGCTGTCAAAACCTTCAAAGCAGGNGGACCNTTCAAATTTTACACNGGATTCCCTGTCTATTGTGTTAGGATTGCTCCTCATGTNATGATGACATGGATTTTCCTNAACCAGNTNCAGAAATTGCAGAAATCCTACGGGTTGTAGTTNNNNNNNCNCCGTGGTAANNNGNANATTTTNTGTTGAATTCAAGCTTTTTGAGCATATTGAATAATTTGTTGGCTGGGTTGTAGCCCTTTTTGGCAACTAAACACCAATGGAGCTGATCATTTTTTAAGTTTAATTAATCATCCGAATGAAGCGAGAATTTGCATACAAACATTGTATTAGTTATATATATAGAATTGGATGCGGCTGGAGCAGTTTAGTATAANTTCCATTTTAGCATGGATG…
Gma.13118.2.S1_at	AW350475	At2g37170	1e-116	Transporter			TCAACCCTGCTAGGAGTCTTGGAGCTGCTGTTATCTACAACCAAGATAAGCCATGGGATGACCATTGGATCTTTTGGGTAGGACCATTTATTGGGGCAGCCATTGCAGCCTTCTACCANCAGTTCATCTTNAGAGCAGGTGCAGCNAAGGCNCTTGGATCATTCAGGAGTAACCCCCATAATTGAGNTGTCTTTCTCTTCNTNATGATGGCTCTAGTGGAAAGAAGAT
Gma.13118.2.S1_x_at	AW350475	At2g37170	1e-116	Transporter			TCAACCCTGCTAGGAGTCTTGGAGCTGCTGTTATCTACAACCAAGATAAGCCATGGGATGACCATTGGATCTTTTGGGTAGGACCATTTATTGGGGCAGCCATTGCAGCCTTCTACCANCAGTTCATCTTNAGAGCAGGTGCAGCNAAGGCNCTTGGATCATTCAGGAGTAACCCCCATAATTGAGNTGTCTTTCTCTTCNTNATGATGGCTCTAGTGGAAAGAAGATAATTGGAGAGATGGNGGTTGATATGGCAAGTTTAATAATNNNNGGNAATGCTTTTGGCNTTGTNTTTNGCAACGTTTCTTTGACCCTCTCGATTATGTCTTCAAGATTGTGGATAAGTGTAGATTAAAGTCTCTTTCATGACAGGGGGAGCCTTTTGCACTTTCCTCTGTG…
Gma.12504.1.S1_at	CD393758	At4g38920	2e-58	Transporter			ATCTACGGTTTGATCATTGCGGTTATCATAAGTACGGGCATTAACCCTAAGGCCAAATCGTACTATCTTTTTGACGGCTACGCCCACCTCTCTTCAGGTCTCGCTTGTGGCCTCGCTGGCCTCTCCGCTGGCATGGCCATCGGCATCGTTGGCGATGCCGGTGTTAGAGCAAATGCTCAGCAGCCAAAGCTTTTTGTTGGAATGATACTCATCCTCATTTTTGCTGAGGCGTTGGCATTATACGGTCTCATTGTTGGCATCATCCTCTCTTCTCGTGCTGGCCAATCCAGGGCTGACTAATAAATTTTCCTGTTGGATGCCACAGATTGTGAATGTTACTGTGAAGTCCGGGTGGGTAATGTTAGTACACAGCTGCCGCTTTGGCTTGCTCAAGTGATT…
Gma.11837.1.S1_at	BQ296775	At5g60790	0	Transporter			GCAAAGCGCAGGTCATGCCTATGAAGAATTTATCCGATGGGCAGAGGAGCCGTGTGATATTCGCATGGTTAGCTTATAGACAGCCTCACCTGCTACTTTTGGATGAGCCAACGAACCATTTGGATATAGAAACAATTGACTCATTGGCTGAGGCATTGAATGAATGGGATGGTGGCATGGTGCTTGTTAGCCATGATTTTAGGCTCATAAATCAGGTTGCCCATGAGATATGGGTGTGTGCTGATCAAGCTGTGACCAGATGGGAAGGTGACATTATGGATTTCAAGGAGCACCTAAGGTCAAAGGCGGGTTTATCTGACTGAAGAAGATAGTGGGACTGGGACACTCCAGCATATCACCATCTAAGGACTACGTTACGTACTGCTGCTTGAGTTGGAT…
Gma.11321.2.S1_at	BE807077	At4g38510	0	Transporter			TGAGGGAATGACACGAAAGGATCATTCNGATGTGTCCAACCAGCTCTATGCAAATTATGCCATTGGAAAGGATGTCCAGGCAATGAAAGCNGTGGTCGGAGAAGAAGCACTTTCATCTGAGGACCTGCTGTATTTGGAATTTTTGGAGAAGTTTGAGAGGAAGTTTGTTGCCCAAGGAGCNTACGATACACGCAATATCTTCCAGTCACTAGATCTTGCATGGACTTTGCTTCGGATTTTCCCTCGCGAGCTTCTNCANCGTATTCCTGCAAAGACTCTTGATCAGTTCTACAGCCGAGATGCCNGNAACTGANGATATAATANNNGCAAGGTCTTATANNNNNNNCCTTAGTCACATGCTCAATCATCTTGTAATGACCNTGACNATTGTTTTATTTC…
Gma.11321.2.S1_x_at	BE807077	At4g38510	0	Transporter			TGAGGGAATGACACGAAAGGATCATTCNGATGTGTCCAACCAGCTCTATGCAAATTATGCCATTGGAAAGGATGTCCAGGCAATGAAAGCNGTGGTCGGAGAAGAAGCACTTTCATCTGAGGACCTGCTGTATTTGGAATTTTTGGAGAAGTTTGAGAGGAAGTTTGTTGCCCAAGGAGCNTACGATACACGCAATATCTTCCAGTCACTAGATCTTGCATGGACTTTGCTTCGGATTTTCCCTCGCGAGCTTCTNCANCGTATTCCTGCAAAGACTCTTGATCAGTTCTACAGCCGAGATGCCNGNAACTGANGATATAATANNNGCAAGGTCTTATANNNNNNNCCTTAGTCACATGCTCAATCATCTTGTAATGACCNTGACNATTGTTTTATTTC…
Gma.11324.1.A1_s_at	CD391559	At3g16240	6e-27	Transporter			GGCCTGCAGTTGTTAGTGGTGACTTCCATGACAACTGGATCTACTGGGTTGGACCTCTTATTGGTGGTGGTTTGGCTGGCCTTATCTACGGCAATGTCTTCATTCGCTCTGACCATGCACCTCTTTCCAGTGAATTTTGAT
Gma.11324.2.S1_a_at	CD397701	At3g16240	3e-92	Transporter			ATTCAAGAGGTTGGTGGTGTGCAGAAGTGCTTTATATAT
Gma.11339.1.S1_at	AW311583	At3g18280	1e-21	Transporter			CTTGTTAAGCACCTCTTATATATATATATAAAATGTGTGAACAATATATATATATTGATTAAAAAATATAGTTTAATTTATATACACACTTTGATCCTATAAAAACATCTTGACACAAGCATTCAATAGAATTTCACCACTTTATCATGACATTTTACTATAATGATGTGGTAATAAAGTAAATTCTTGTTGAATATTTTGTATAAAGATGCTTTATACTCATGGTTTCTGTGTATAAATTAAGCTTATATATATTTACACTATATATTGCCACTTTACGTTTGTGTGATATTAATTATACAGTCAAGTATTTATTAGCTATCTTTGAATATGGTGTATACACTAGTATACATGTTGTATCCAGGGAATTATGGTTAAAGAGCTAT
Gma.1421.1.S1_at	BQ081098	At1g55840	3e-87	Transporter			AAAATCCAGGTGCTGCAAGGTTGTGGGAAGGAGGAATTACTGAAGGTAATGGACTATGCATCCCTCCCACACTTCTGCAGAAAAGAAGATTCCAAGTCTTCCAAACATCATGCATTAGGAAACATTGGAAATTGTTTCTCCTTCAATCACGCCTTCCATCAACAACTCTACAATCACATCAAGCAACAATCCATCATTGTGGAGTCAATTTCACCAATCAGACAAGGGTCCTTCTATGTAGACATACCAGAGCCAGACCCTGATGATGCCAAAATAGCCAAGACCATAGAAACTGAGTTCCACAAATTGGAGAATCAGAAGAATGGCTTTACCAACTCACTAAATGGTCTTAGAGTTAATGGCCATTGAAAGCTATGCTACTAAAGCTACNTANTAACT…
Gma.1442.1.S1_s_at	CD407234	At5g12240	8e-08	Unclassified - Hypothetical Protein NOT Supported by cDNA			TTAATCAACAAGATTCATTTTGGAGCAAGCTAAAGTCNGAGGCTGCTAGGAAGGTGGGTGCAGAAGAAGCGGAGAGATTTTGCAAGNCNTTCCAACAAATCCATAAGAAACTAGTCAATGAAGAGTTGAGTTTAGATGCTGCTCGAAGCTTCTTAAANTCATCCTAGAGTTCTAAAGAATCACGCATGCTTTCGACATTTCTTNNTGATTNAACAATCAGCCNNNNNNNNATNGTAATTCTTTTGTACTGTATCAAAGTATT
Gma.15891.2.S1_s_at	BI316425	At1g22800	4e-30	Unclassified - Hypothetical Protein NOT Supported by cDNA			ACGGCACTGTACCTGCAACATTCCAGGTTATATACATGACGGGGTGGAGAGAACATCCTTCTCAGCAGAAAGCAAAAAGAAGGGGATCAGCCACTATATCTTTCAACGATATTCAGAAGCAATTTGGAAGCCAAAATTGATTGTCCTTCCCCTTATTTTTCACTCTGCATATTTTAGTTTAATTAATATACTTGGCGCATTGTATGTGTGGGTATACTCTTA
Gma.11341.1.S1_at	BG652352	At4g17900	3e-88	Unclassified - Hypothetical Protein NOT Supported by cDNA			AGTGTTTCGACGTCGTTTCATCAAANTCCAATACTCGAGCTTTCCTAGGGCCGGTATTTGGAAGTGTCACCGTCCGTCTTTTTNTTTTTCTTCTTGTAGTGGTTTCTAGCGTTTTGTATATATAGNAAAGTCCAANAGAACTGGAAAAGGCTGAAGANGTAGAAATAAGACACCTNTGAAATAGTTGATGGTGCAGTGATCAAAAGAATGGCNTGTAGCAAAATAAGCAAGGCTCTTTTNCAACCTTAGTTAAGGTGATGATNTTTGNTAAGGACTTATAGGGTTTGGTTTCTAAGGTAAANNATTATACCTAAGTTTTGGGGNTAGAGNATATGTAAATAGTGGCTAAGTGAGGTTGGNGAAGACGACAAATGAAATGATGACAATGTACTTCTGGGA…
Gma.11315.1.S1_at	BI425375	At3g13460	1e-158	Unclassified - Hypothetical Protein NOT Supported by cDNA			ATTGGTTGCCTAGTGAAGATAAAGATCTGTATATTGAGATTGGCTGGGCGGAGTTANTTCATAGAATGCTAGCACCAATCCCTTCTCATTGGGTTTTGTT
Gma.12333.1.S1_at	CD391778	At1g72170	4e-27	Unclassified - Hypothetical Protein NOT Supported by cDNA			GGTCTCTGAAACTGCTACTCAGAATGTGCCGGATTCTGAGTAGAAGCTACAACGGATCCTGGTTCCTGGTTCCTGGACAGTGGTGAATCAGAATTTTCTTTTGATTGTTGATGGTTCCATACAGCATTATTGCTCTTCAAAATGTTGCACTACCATAATTTCGTAAATGAACATGACGTATATTTTATTCCCAAGCTTTTACGCTTTTGATCTCCTGTGATCTTACGCAATGTTTATGTTGAGAAGGATTGGAAAAGCCAAGGAACCTTTCTTCANNNNNNANNNNGTATTCGCTCTACTTTGAATCCGATTTAAGTATATTCTAAAATCGGATTGGTGAGTTAACTGAC
Gma.12483.1.A1_at	CD393502	At3g51230	0.0009	Unclassified - Hypothetical Protein NOT Supported by cDNA			TGTGCTGAGTCTGATGTGATGCGTTTGAAGGGGTTGCCTACACCCAAAGGAAAGCACCTTCGTTTTCCTGAGGAGGAAGAAAATTCTGACTTGTGATTTTGATGCTGTGAGTGTTGTTTGCTTTTGGTTGTCTTTCTTGACACCAATGTTTTGGGTTGGGCCATTGGTTAATGATTGCTGTGATTGATTGGAAGCTAATTGCTG
Gma.12381.1.S1_at	BU547775	At1g69840	1e-102	Unclassified - Hypothetical Protein NOT Supported by cDNA			AAGCGGAGGGAGAAGCAGAATCCAAATATCTGTCAGGACTCGGTATCGCTCGNCAACGTCAGGCCATTGTGGATGGACTGAGGGACAGNGTGCTTGCTTTCTCTGAGAACGTGCC
Gma.12381.1.S1_x_at	BU547775	At1g69840	1e-102	Unclassified - Hypothetical Protein NOT Supported by cDNA			AAGCGGAGGGAGAAGCAGAATCCAAATATCTGTCAGGACTCGGTATCGCTCGNCAACGTCAGGCCATTGTGGATGGACTGAGGGACAGNGTGCTTGCTTTCTCTGAGAACGTGCCNGGGACANCAGCTAAAGATGTCATGGACATGGTGCTGGTGACTCAATACT
Gma.1330.1.S1_at	BM891980	At1g31200	2e-22	Unclassified - Hypothetical Protein NOT Supported by cDNA			CTCTGCACTAGCTGAGACCTGGATTATTCCAACTTGCAAGTGCTGTGAGAATAACAGTGTGTTCTGGTCATGCATGCATGCTGAGAGAAACAATGTATGTCGGTCTTAAAAAGTTCACTGTATTTGCATAAACTATA
Gma.1337.1.S1_s_at	CA802041	At4g24690	4e-17	Unclassified - Hypothetical Protein NOT Supported by cDNA			GGTGTTTCTGAGTGGGACCATATGCTTGAAGAGTTACAGGAGATGGGTTTTCGTGACAAAGAGATGAATAAGAGACTGCTTGAGAAAAACAATGGAAGCCTCAAACGTGTTGTTATGGATTTAATAAACGGCGAGTAGTTTTAGTTGAAATGTTAGTTAATAGTTTATGTAAAGGTGACGACTTGTGCTCCTAGGGTGCCTGATACTTGCCTGGCAGTCATAATTATCTTATTTCCTATCTCG
Gma.11249.2.S1_at	BE611552	At3g50590	2e-76	Unclassified - Hypothetical Protein NOT Supported by cDNA			GTCAACCATTGGATACGATGTCTGTGATCTCTGCGGAGCCAAATTTTCAGCTGTGACTGTGCCTGGATGCATCGTCTGCGGAATGGGAAGCATCAAGAGATCAGATGCTCTTGCAGGAGCAGGACCAGTTCCTTCTCCGTTCGGTTGAGTCTCAAAGATGGGTCTTAATCCTTGCGCTCTATATAACCTTTGCTACTCTAATGTTGTAAAGGGAGACAACTTTGTAGAGAAAGTATACAAGAGAATGAAGGGATTATAGGGTAACAAATATTGCACCACTTCTAGAGAGATTATAGGGTTTATCACATACTGCTTGAGTTTTGATTGCGATTGTGATGGTTGTCTGTGATTACAGAATATGTNNCTCTCCNNTATGTTTGTAATTTTGTAATTATATTC…
Gma.110.1.S1_at	BI945132	At3g06760	0.002	Unclassified - Hypothetical Protein NOT Supported by cDNA			TATATTGTCACAGCTGCACCTTTGACATATAGTGCTGAATCTGATCATAGTTATCCTTTTATCCCACCCTTGTAAGTTGTAAGCATCTTCACTGGAGATGTACTACTCTCTGAAAAACAAGAAGTTTTCTAGCTTAAGAAATGACCTATTTTGCTATATTGGCGTATGTTGATTCCCTGGACTCAGAACACTAGGACCTTATGCTCCCTTTCAAGTGGAATCTG
Gma.11015.2.S1_at	BI699850	At2g37340	2e-50	Unclassified - Hypothetical Protein NOT Supported by cDNA			ACAAAAATAGTCCTCAGCCCTCCAAGACAAGGAAGCATAGTCCATCACCTGACCGTAGCCCACAGANAAGAGGTGACACATCTCCNGACAATGATAGGTTGAGNAGAAGCCCTGCAAGGGACCNNGAAGATAGGGGCTATGACAGCCCTAAAGTTAATGGTCGTAGTGGCAGCCCTAGCNGTAGCCCCAGGGATGATGACAGGAGCCCCATTGANGATGANNACAACCACCGCCACTCACCAAGAGGCAGCGAGTCACCTTAAGAAGTATTTCTTAGAGAAATGAACTCTGNACGTGGCCTATAATTTATCTGCTTTGGTTATCTAATGCACTTTGTTGTGAAGTATGGGACAATTTTTTCGC
Gma.10906.1.S1_at	BU545058	At3g53670	2e-13	Unclassified - Hypothetical Protein NOT Supported by cDNA			AATGTCTTTTCCTATTTCCTTGAATGTACATAAATAAGCGATATTTTGCTGTTGGCTTATTTGGTGGAAAAATAAAAAGAAAAAGACATTGGGTTGTATGGTGAAAGTTGTTTGGTTGATGTGGGTGGGACAAGTTTTGGTAGACGAGGTCATGTCTAGGCTTCTGGCTTTCCAGTGATAATTCTAATGAGGAATCTCTAAGTGGTGTTTTTTGTTGA
Gma.10888.1.S1_at	BI974790	At5g25560	1e-111	Unclassified - Hypothetical Protein NOT Supported by cDNA			GTAAAACTTCTCACGTTCAGTTCCATTTTGTGGCTCAAAAGTGTCCGAACTGCAAATCCTACAACACACGACAAACATGAGGCGGAGCAGGTGGCCACGATTATTCATTGGCTTCATCAAAAGCCTTCACTCGAGAGCTCTCTTGATGTTGTCGTGACTTGTGAAGGCAGTGAAAATAGATGTGCATCCATTGGGTACGTGGATGTGCACGTGTGGGAATTTGGAGTGCATGATGAGCCACATTCAGAGGGATAAAATAATGGTTCTTATGTTGATTTGGAGTGGGGTGGTTTAATTTGTTGGGGCTCCCCTAGTAGTTGGAATAGT
Gma.10639.1.S1_at	BI470008	At2g41010	3e-27	Unclassified - Hypothetical Protein NOT Supported by cDNA			TGGAAAGTCATGTGATAAAGAAAGAAGAGAAAAAAAAAANTTGAGAATATGAGATGAGATAGATTCTCTGAAAATTTTCTTTTTNCTTTTTCCCTTTTTGCCCCTCTCGTGGGTTAATGAATCTAGCAGGGGAAGCTAGCTAGGATGATCTTATGTAAATTTGGGAAGGGAAAATGGATATGGAACTAGTATCTCTNTNTTTTTTTTNNNNNCTTTCTGTAATTTCTGTAACATAGTTACTTTCTTGNTATTACTATTATGAAGGGGTGGAGATATGGTAGCTTTGTTTAGTTT
Gma.10717.1.S1_a_at	AW706700	At3g06390	4e-27	Unclassified - Hypothetical Protein NOT Supported by cDNA			GCATATTTGGGTTTGAAGGGAAACAGACACGTGGTGGGTTGGAATAAAATTTGCCATGTTTACGACAAGTTCTGTAGGCATGTTGGTGCCTCCATAGCAGTGGCTTTGTTTGGAAGCGTTGTGACAGTCTTGCTCATTTGGCTTTCAGCTTACAGCATTCATAGCCGAGTCCCCAAGTAGATGGAAGGAACATGGATCATGCATTCTGCATATTTATGCATACATCTTCATTTATTGTTTATAAAGTTAGTGTGCTCAGTAATTGTTAAGAGTGTGTAGAT
Gma.1761.1.A1_at	BQ454208	At1g15780	0.0001	Unclassified - Hypothetical Protein NOT Supported by cDNA			TGCCGTTCCATGCAAACATCTTTTTTCCTCTTAAATTTGCCNAAACTTGTGTCAATCATTGGATACGGAGTTTTTGGGTGCANGNGAAAAGCGATCATGCATCAGGTCAAATTGGTCTCGTTTCAGTGAATTGTGTATTCAGTTAGTATCCCATTTTCTTGCTTATTTTTACGCTCAAATTGCGATGTTTGCCGCTGCCTAAGACGCTCAATGTAGTAAGATTTGTGTGACTTGAATCAAATTGCCTTCACCAAGGCTTTGTTAATAACTAATATAGTAGCTCAACAGTAAGGCCCGTA
Gma.2087.1.S1_at	BG882675	At3g62370	1e-120	Unclassified - Hypothetical Protein NOT Supported by cDNA			TTGGGTTCCCATTGACATATCTGTTGGTAANTCTTTGANTGGCAAGTCAGTNGATGCAGCATCAANTAGCTCGTGGAATGTTGCTAGTGCCTTTTCTGTTATACTATCAGTAGCAGCACTTTGNGTGTCTGTTTTTGTGAGCTATAGGGTGTTCAGCCCCAAGAGTGTCTCTTTTACACCNATAGAGAACAACAACCTTTAAATATTGAACCAANAGCTTGAGTTTGGGATTGTACTATTCATTNNGCTTGTACTAGATAGGTTTGTACTGTTTAGTGCTTTCTCTTTGCTCTATTTTTTTATTATAACTAAAGCATTACTTTAGTTATTTTAAGCAGTGTCAGAAAAGTATTAATTCATTATCAACATTATGGAGTTCCATCNNNNNNNNNNTAGTTA…
Gma.1694.1.S1_at	BE609625	At4g32270	1e-28	Unclassified - Hypothetical Protein NOT Supported by cDNA			GAATTACTGTATTTTTCTGAACACAACACTAAATTCAGCTGTGACACAGACAATTTGTGGTAATCTGAAGGATCTCTTTACTATTGGCCTTGGCTGGATAATTTTTGGTGGGCTACCATTTGATTTTTGGAATATAATTGGGCAATTTCTCGGTTTTGCCGGATCTGGCTTATACGCCTACTACAAGCTCATTGGCAAGTAACTTATTCAAGTCCTCTAGATGATGTCTTTTTTTCAATTTGGGAGTGCCATGTGCTTCAGTCTTCTGCCCATCTCTGCATCCCTTGAGAAGGGAGAAGAATCTGAATCAAACTCAGGTTTGGGAACTTGTGATCGACTAATCTTATACTATGGGGAAGTTTTGCTAATACAAGTTGACATACAAACAGTTTCTGGGGA…
Gma.2518.1.S1_a_at	CD392237	At5g19070	0.0002	Unclassified - Hypothetical Protein NOT Supported by cDNA			ATTGATGGGATTACTTCCTCGCCAGATTTACCTATTGTTGCTGAACCATCAGCAGATCTTAACCAACCTCTCATAATTAAGATAGATTCTTCTGAAGACAGTCATGAAA
Gma.2269.1.S1_at	BI321941	At3g63500	2e-37	Unclassified - Hypothetical Protein NOT Supported by cDNA			GACTGAGACTGATGAAATTCGTAAACAAAAATTTGAAGAAGCCCAAGCATTAGANAGNGCACATCTGGAGTATTTGAACATGAAAATGAGAATGGAGACAGACATTAAAGATCTGTTATCCAAAATGGAAGCTACCAAAANGAGCCTTGCCATGTGATCANANNAAAANAATCTAGAATAGTACTTTCAGGTAAATNTATTATGTCCCATCCTGAAATTTGTAGNTTCTGATGTCACCANCTTATTGTTGTNAGCTACTTNAGTCCTGATCCGTAGTTGTATCTATTNNNNGTTGTAGTNCGTNTTGCTTTTNAGCTGCTAACCAAAACCTGTAGAGTNCATCAGTTATTAGTCTTNTGAAACAATNNCAGTTATGAAAGCAATTTAAAATAGATTATC…
Gma.3758.2.S1_at	BM524173	At4g17900	7e-88	Unclassified - Hypothetical Protein NOT Supported by cDNA			ATAATGCCCCTGATATATTTTACCTCAAAATGCAACTTTCTCCGTGCAGTTTCACCCGTTCCAACATACGTGAGCTTTTTGCTGAAAAAGGCCGGTGCTGGAAGTGTTTCCTTCTCTGTTCCTTACTTGTTAATAGCGTTTGTCTATATGGGAAAATTCCAATAGAAGTGGGAAAAAAGGTTGAGAAAGTAGAAAAAAATAAGACATCTGTGAAATAGTTTGAGAAAAAGAATGGTGTAGCAAAATAAGCAAAGTTCCTTTCAACCAAAGTACAAGAAGATGAGGAACATTATAGGTTTGGTTTCTAGAGCTATTATACCTAAGTTTTGGGTGGTGGGTGTAAATAGTGGCTTGGGGAAGAAGACAGTGACANTGTACTCTTTACAANTAGGTGGATTG…
Gma.3758.2.S1_x_at	BM524173	At4g17900	7e-88	Unclassified - Hypothetical Protein NOT Supported by cDNA			ACCGTGCCCCAATGGGAGGGCTAGTCATAGAATACTAGAAAGTTAGTAACTTTTGGTTATTTGCTATAATGCCCCTGATATATTTTACCTCAAAATGCAACTTTCTCCGTGCAGTTTCACCCGTTCCAACATACGTGAGCTTTTTGCTGAAAAAGGCCGGTGCTGGAAGTGTTTCCTTCTCTGTTCCTTACTTGTTAATAGCGTTTGTCTATATGGGAAAATTCCAATAGAAGTGGGAAAAAAGGTTGAGAAAGTAGAAAAAAATAAGACATCTGTGAAATAGTTTGAGAAAAAGAATGGTGTAGCAAAATAAGCAAAGTTCCTTTCAACCAAAGTACAAGAAGATGAGGAACATTATAGGTTTGGTTTCTAGAGCTATTATACCTAAGTTTTGGGTGG…
Gma.4046.2.S1_at	BU549243	At5g64550	2e-12	Unclassified - Hypothetical Protein NOT Supported by cDNA			GGAAACTCCAGCAAAAAGACAGCACCTGATACCCAAGGAGGTGTTAGTTCCGCTCTCGATGAAATCACCNTCTTATTCAANCTTCTTGGCTGCCAAGAAGNCNGACCAAGACAGAAACTGCCAAAGCTNGGCNGCNGGCNGCAGNNGTGCTCAGAAAGGCNTNGANTTTAATCTNCCGGAGGGCAGGGTCCACGGCGGCGACCTCATGTTGTATTTTGGAGGGAATCTCAAAAATGCACTNGNCNGCATCTGAAATGGGNGAGGGAGCCNGGTGTCNCGCAAGTTGTAGATTCATTTTAGGNATTAGGGACCATTTCCATCATGGAATTNTGNATAANGCTTTGTTGCTGCTTGTTCAATAACTNTGTGTATAGTTGGGTGTTNATTATTATTANNNGC…
Gma.5710.1.S1_at	AI442566	At4g08230	5e-28	Unclassified - Hypothetical Protein NOT Supported by cDNA			AGTCTCTGCCCCATGGCTTACGTTGAGCGAGGTGTTGTCAAATCAAAGCGATCAATATGGCGGCTTAAAACAATCACTGATTTTTTCTGGGCCATTGTTAACTACATAGGCTTGTTTTTTGCAACTATGTTCTCGATGGAAAAGTCAGATGCCTACAGAAAAGGTTCTGTTGGTAAGAAATGGGATGGCGGTGCTCCTGGAGGAGGTCCTGGTGGTGGTGGCGGCGGTGGTGGCGGTCCCCGAGGTCCTCCTCGTGGGGGTCTTGACAATGTTCGTGGGCTAGATAGTATAAGGGGACGTGATCATAGTTCACTTCCTGCCTGCGGTTCCTGCTGTGGCTGAATGTTAGAGATCCAATTTGTGTATATGCCTTTTATATGTTACGGTTTGTATCTGGTG…
Gma.5330.1.S1_at	AW705639	At1g62280	1e-57	Unclassified - Hypothetical Protein NOT Supported by cDNA			ATATGCCTTTCCTTTGGTGCACAAGCTTTGCTCTGGAAGAGTTTGAGTAAACACAACAAGGACTCACAAACTCTCTGGCATGGATTCAATTTGATGCCTTCCATTGCGTTTCTACTACTTTGGTGTGTGGCACTGCTCACTGCCACTACTTTGTCTTTACTTTACGTGCTCAAGTGCATCTTTCACTTGGANATGGTGAAGGAGGANTTCTCACATCATGTTGGAGTGAACTGCATGTATGCTCCTTGGATTTCTTGGCTTCTCATGCTTCAATCAGCACCCANCATCNTTCATTCAACTTCTTGCTACNNAGTTCTTTGCTTGGCCTTTTCGTTTGTAATATTGCTGCTTGACATAAAACTATATGGACAATGGTTCACAACTAAAAAGAGGTTCCTG…
Gma.4353.1.S1_at	BE822940	At4g14450	3e-06	Unclassified - Hypothetical Protein NOT Supported by cDNA			GTTGGCATCATCTCCGACGCCGATCGAGCTAAAACCGCCGCAAGAGCCGCCGCAGAGGGAGCCGGAGAAGGTCACCTTGTCGTTCAAGAAGTGGCAGCATCCTGCGGCTCCCTTCTGTTACGAGCCCGCTCCAATGGTGCCGCCCTTTGTTCCTGTGTAGATGAACGAACGAGAGAGTTTTAGGATGCTATCTAATGGTTCATATTTAGAGAGAATGAAGAAGAAGATATAACGCTGTATTTTTAATTAATTAATTAATATTGTTCCTTTCTTCTTTTTGTTGGGGAGAGGCTTTGCCTTATTTTGCACACGGGGGTATTTATCAATACCTGTGATTGTGAATATACACCCCCTCTGTG
Gma.4917.1.S1_at	BI969807	At1g04940	2e-75	Unclassified - Hypothetical Protein NOT Supported by cDNA			AAAAGAGTGGCCTCATTTCTTCAGATTTCATGTTGTGATGGGAATGTTATTGGAGATTGCCCTGCAGGTTATAGGGACTGTGAGCCGNTGGATGCCNCTATCACTCTACTGGGGTAAACTGGGAATGCATTTNTGGACTGCCGTATCATTTGGTTATCTNTTTACNGTCTTGGAGNNCATAAGGTGNGCTCTTGNNGGTATGTATGCTGACATTCCTTTCATCTGTGANNGCAGCATATATCCANATNCCATATGATTAACANGGNAGANGTAAGGAAGTTTANNNTTACATTATGTATCACTTTTCGTTGTATNAGANTTTTTCTTGAGCAGNATTGAAGAANNANTAGTCTGTTAGTGATTGTTTATGTGAAAAAAATATGTATTTGAGATTTCCCT…
Gma.5103.1.S1_a_at	BI968925	At1g80500	5e-35	Unclassified - Hypothetical Protein NOT Supported by cDNA			CTTCCAAGAGGTGCATGAGCTTTACATAAAGACTCTCCTTAATCCCCTGTACTTGCCTGGCTCCCGGATCACGTCATCACATTTTGATACTAAAGTCCGAGCCCTTGCACGAAAGTATCTGTAGTATGTAGAAACCACTAATTGTCTATGGTTGCTAGTTCATATAGCTCTGTGGCCCGACTCTCGTTCGTTCTTGATTACAGTTGAAAAGTTGGCTTTCTTTTTCTTTTTCTCCTTCATGATTTGGCGGCATGGTTAGGTTTGCTGTTGTCTATATTGTACCTCAGTCATTAGCAGGTGGT
Gma.5103.3.S1_s_at	BQ094329	AtMg00030	6e-25	Unclassified - Hypothetical Protein NOT Supported by cDNA			GATGGCCCGAGGTAGAGCACTCAATGGGCTAGGGTGGCCCCATTTCGCCTTACCAACCCCAGGGAAACTCCGAATACAGGCCTAGATCGTTTGTACAGACAGACTTTTAGGGTGCTAAGATCCAAAGTCGAGAGGGAAACAGCCCAGATCGTACNCNNNGNNNCCNNNNCAATCACTTAGTGGAAAAGGAAGTGATCGAGCGATGACAACCAGGAGGTGGGCTTGGAAGCAGCCATCCTTTGAAGAAAGCGTAATAGCTCACTGGTCTAGCTCCATGGCACCGAAAATGTATCAGGGCTCAAGTGATTCACCGAAGCGACGAGACCTTGAAAGTTGCTTTTTCAAGTGTCAGTAGCGGGACGTTCTGTCAATCGGGGAAGGTTTTTGGTGACAACACCT…
Gma.6370.2.S1_a_at	BE346886	At2g23970	5e-59	Unclassified - Hypothetical Protein NOT Supported by cDNA			TAAACGTGTCATCATCTTTACCCTTGGCTTTCTCATNCTCTTAAGNNCTCCCATCAAAGCTTTCCATTTACAAATGTCACCGGGATGNGATCCTAGAGCTCCCTCCAAAAGCAGAGGTGATTGCTTGGTCAGAAATGACTGGAGTTGAGATGTTTAGCTATGGAGACCACATGTTTGGCATCCAAGGCCACCCGGAATTCACCTATGACCTTCTCTTGTTCTTTATTGACCGTATTATTCAGCGAAATTTGGTCCAGGA
Gma.6415.1.S1_at	BE819876	At2g40110	5e-55	Unclassified - Hypothetical Protein NOT Supported by cDNA			TTGGCGAAATGGAGGACAGACCGATGATGACTGGGTTACATACNGTGGCTGACATTTTCTGTGTGGGTTGTGGATCNATNGTGGGTTGGAAATATGANACTGCNTATGAAAAAAACCAGAAGTACAAGGAAGGAAAATCNGTGCTTGAACGGTACAAAGTGTCAG
Gma.6415.1.S1_x_at	BE819876	At2g40110	5e-55	Unclassified - Hypothetical Protein NOT Supported by cDNA			GGACATTCCATTGCAGACATGGGAAAGCTTATCTCTTCAATAANGTTGTGAATGTTTCTNTTGGCGAAATGGAGGACAGACCGATGATGACTGGGTTACATACNGTGGCTGACATTTTCTGTGTGGGTTGTGGATCNATNGTGGGTTGGAAATATGANACTGCNTATGAAAAAAACCAGAAGTACAAGGAAGGAAAATCNGTGCTTGAACGGTACAAAGTGTCAGGTCCTGATGGAAGCAATTATTNGATCAGCAATGAGGCACATGTTGGTGGAAGTGATGCAGATGATGCTTAGTCATCCTACCATTCNCAATTNNNNNNNCACCGTATTTGGATGAAGAAAGCCTTTCAAGTGCCCTGTCTCTGACTCTCTCTCACTCTCTTAAATGGAATGTATT…
Gma.5972.1.S1_at	BE800605	At3g09860	2e-46	Unclassified - Hypothetical Protein NOT Supported by cDNA			GAAACGCTTATCGTGGCGACCCGGGCGTGCCCCATTCGGACCCGGATCGCTTCGTCAACATATGGGTCGGATCCGCTGCCTTCGCTGTTCTCACATATTTCAATCCCTACATGTGGCAGCTCTCTAATCAGTTCAATTGGCATGACAAAGCAATGTTATATGAGCAATATCACTGGAAACAGGCAAGGAAGAAGAATCAGCCATATGAGTTCTTGTGGAACAAGACCTGGGACAAGAACCACCGGGAACATTACTACTACAACTGGCCTATTTACTTTCCTTAGGCCACTTCTATTTCATTTCTTGCATACTTTGTCCTAT
Gma.5957.1.S1_at	BM092059	At5g37370	2e-10	Unclassified - Hypothetical Protein NOT Supported by cDNA			AAGCAGCCGGGATTATGACAATGGTAGTAAGCACTATCGTAGGAGCAGGAGTCGGAGTAGAAGTCGGAGCCTGCAAGCTGGCACTGCTCAGTATGAATCACGTTCTAGTCCTCAGAGAGAGGAGAGTAAGAGAACTTCTGCTTCGAGTAATCTAGCTCAACTTAAAGACATGTATGGTGATTTAGGGGATAATAAAGGAGATGCCAACATGGAAAGAATTCCTAGAAAGGATAGTGGAGGTGAAGAGGTTATTAGACTTGGCGGGTCTACTTGGAAGTATTGAAAGTTATCATGGAATGCTTGTATCAGATGTTGGATGGATTTCATGGAGAAAAATATTGGGACTAGCCCTTTTGTTGCCAGATGTTTAGATTGGTGAATGCTATCATTAACATTTAT…
Gma.6108.1.S1_at	BQ611542	At5g04080	0.0001	Unclassified - Hypothetical Protein NOT Supported by cDNA			TACAGACACACATACCTTGATTCTCCAGAATGCAGAAGCCAGAGACCCAGGGAAACCAGCCTCCCCCAGGATACCCAACTGAGAATCCCCCGGCCAAAAGAAAGCTGTTTTTTGGTTTAAAGAAGAGAGGAGAGAGAGGATTCATTGAGGGATGCCTCTTTGCTCTGTGTTGCTGCTGGCTTTGTGAAGAATGCTGCTGAACTACAATTCTAGGTAGAGCCTAGAGAGCTATATTGGCATATTAACAACGACGGTTACTGCTTCTTTCCTAGGTTGTTAGCGTTTATTTTAGTGGATTTCACCAGGCNATACGTTGTATTATTACTACCTTACCTTATATATAGTCATGTTGTAATATACACTCAAGTGATCATCTATTCTCA
Gma.6024.1.S1_s_at	CD397288	At1g20760	2e-32	Unclassified - Hypothetical Protein NOT Supported by cDNA			TAGCAGCAAGGATTTTGGCTACAATAATCATAAATTCACAAGGTTTGACTCCATAAGTAGCAGCAAGGATTTTGGCTCCAATCCTGAGACGCTCACAAGGTTTGATTCCATGAGTAGCAGCAACGATTTTGGCTTTGGTCGTCAGGGACATGCAAGGTTTGACTCAATTAGTAGCACCAAGGACTTCGGTCACAGTGGTCCATTCTCTTTTGATGACTCTGATCCATTCGGCTCCTCTGGCCCTTTTAAGGTCTCTTCTGAAAATCATTCTCCGAAGAAAGGTTCAGATAACTGGAGTGCATTCTAGCCTG
Gma.6025.1.S1_at	CD399734	At4g33960	0.0004	Unclassified - Hypothetical Protein NOT Supported by cDNA			GACTCGAATTGTGCATAACCATGGTTCGACTAGCCATAGAGTTCGTCGTGAGCGTCGCGGAAACAGTGGTCATAGTTCAACAGAGAACCGCTGAGCCTCTTGGAACGTTGAATCGCGCAAGTACACCTCTTCCTTTCTATGGCTACCTCCGTTGAGTTGAAGAATATCTCTTATTTATTTTCTTTTCTTCTGTGAAATTCCGCAATTTGTATAGACCCTATGTTTTCTTTTCCTTTTGGGTGCATCAAACGCTGATTGATGCAAACCCAGTTGTTGTTGTTGTAAGGAAAATTGATGCCCTTTTTTTTTCTGGGTTTTGGCTGGACTTCTTGTATTCCTTGAATCCAGTTTCCTTTTCTGCTTA
Gma.6046.1.S1_at	BE022758	At4g32090	2e-14	Unclassified - Hypothetical Protein NOT Supported by cDNA			AGTGTTGACCCTTCAATTCTTTCCATGGAAGGTGATAGCTGCTTACTCATCAATGGGAATCCAATGAAGGGTTCTGATACTGTTAACTTCTCCTATGCCTGGGATCCTCCCTTTCTGCTTTTGCCTACAAGCTCTGTTTTAGGTCCTTGTTCATAGGGATTTGCTTAACAGAATATGAAAAAGAAAGAAAGAAAAAGCAATAATAATGATAATAACTGTGAATTTGAAGCATGCTGTGGATTTCAGTTCTATGAACCTTTGAGTTTTCGT
Gma.8085.1.S1_s_at	AW705679	At2g26280	1e-59	Unclassified - Hypothetical Protein NOT Supported by cDNA			GCAGGTTTACATCTGTGTTGGCACTGGTCACCATACTCGGGGCTCCCGCACTCCTGCGAGACTCCCAATAGCTGTACAGCGTTATCTTCTCGAAGAAGGCCTTGATTTCACTGAACCGCAGCCGGGCCTGCTTTGTGTTGTGATATACTGAACCAAGGAGATATACAAGTTTCTGACACGGTAAAAAAATTCATCATGAACACATAGACATTGTAGTCATTCTTGTATCTGTATATGGGAAGTAATGGCAATGGTCAAGTCAAAAAGAAAAATGAAAAAAAAGAGGTTTTACGGGTTGAGAAAAAAGAGGTTTTACGGGTTGAAAAAAAATGGAAAAGGTTAGAAGTAAAGAGAAGGGTTGTAGCAGAATTGTACCATTAAGGTTTCAGAGGCATCTGA…
Gma.8091.1.S1_at	BI317520	At2g25970	4e-43	Unclassified - Hypothetical Protein NOT Supported by cDNA			ACCATCATATGGTGGTGTCCCAGCAGGTGGTCAACCAGGTTATGGCCAGGCTCCTCCATCGTATAGCAACAGTTCTTATGGTGCTGGTGGTTATGCTCAGCCTCCAGTATATTCCAGCGATGGTAATGCAGGTGGGACTACTCGCGGAACCTATGATGGAGCACCTGCCCAGGCTGTTCAACAGGCTAGTGTTGCTAAAACGTCACCTCAGAGTTGATTTAGTATAGTTTGTCAAATTTGGATCTTTCTGAATTGTCTGTTTTAATTTTGTTGTAGTTTCTGTTGTAGTAGTGACGCATTTACATAGCTTTGCGGTGTTGAGATGGANNNANNACACTTTATTTTCTGTCTTAATTAATTTAATTCCTGCGTTTGCGTG
Gma.7204.1.S1_at	BF069633	At1g33780	9e-94	Unclassified - Hypothetical Protein NOT Supported by cDNA			TTTGAAGAGGTAATCCCTGGGCTATGTTTTGGATCTCGAAACAGTTTGGATGATGCTGCAGGACTTGTGAAGAAGGGGATTCTCAAGCCTCATGACTTCAGATTCTTTGTTGGTTATGCTGGATGGCAACTGGATCAGTTGAGAGATGAGATTGAGTCAGATTATTGGTATGTAGCTGCATGTAGCTCAAGTTTGCTTTGTGGGGCTTTATCAGATTCTTCAGAAAGTTTGTGGGAGGAGATTTTGCAGCTAATGGGTGGTCATTACTCAGAATTGAGCCGGAAGCCAAAGCAAGACATGTAGCTACTCATGTATGGTTTCAAATTCAGAGTCAAATGAATGAAGAACCTGTAATCAGGGTGCTACAAAGTCAACTGTACTGATGTTCACTTTAATGNC…
Gma.7112.1.S1_a_at	BG363393	At2g34750	1e-96	Unclassified - Hypothetical Protein NOT Supported by cDNA			TTTTAACCCTGACTTGAACAAAATGTCTATTACTCCCAGAAAATCTTTTAAACATGGGTTTGAGACACCGTTGAATCAATGTACGCGAATGCCAGCAAGAATCAGACCGTCCACTAGTCCGGAGTCTCTGTGATACCTATCTGCTTGTGATGATCTCTNTACATAAAATAGGAAATCTGTCGATCTTNCAGTGTTCATGCCAGGAACTAATCAGCATAGTGGTGTCCTATAAAATAGGGCATTGATATTTTTGGGATTTGAGTCCTATACAACGAGGGGAGTTACTTAAAAGGAAAGTGTGGAATTATAGCCGTTAATTTAAGTNGTTCTGCACATTNGAGGAGCAGAGTCAAATTCGTAATGTTCATATAGTNTNANTTTTTTNTTCACANCTTGTAC…
GmaAffx.661.1.S1_at	BI969786	At1g65430	1e-10	Unclassified - Hypothetical Protein NOT Supported by cDNA			AATGGAGCTGCTTCCAGCAAAGCAACGAGCTCAAAAAATGCTGCNGGGAGCAGCAAGGGGAGAGGNGGAAGAGGAAAAGCGACTATTCGAACTATATCCAGCAGAATGACTGATGATAATCATTGGTCTTGTGAGCACTGTACCTATGCCAATGTTAAGTCTGCCACCACATGTCAAATGTGCAATCAACAGCGTCGATGAAACTTGGATCCTTNATTAGAAATNCATGTCTTCTGCCTAAGGCCAATGCACCAAAAGCTGAAATGGAGTCCTTACTNNTNGTTATATCATATGCTGGCTCCTTTTTNTAANGCTANTTACTGTGAAAGGGGNNTAAGTCGCNTAAGNNNGGTTATCCTNCTTGCACTCCTATTGAATACATCCC
GmaAffx.5948.1.S1_at	BU546765	AtCg01130	2e-42	Unclassified - Hypothetical Protein NOT Supported by cDNA			GATGCAATTAGAACTGATTTGAACGAAAAAACAATAGTAAATGGAAATAGAACAAAGTGTATTAGAATAAACGAAATCCGTAAAAAAGTTCCTCGATGGTCATACAAATTTATTGACGAATTGGAACAACTGGAGGGAAAAAATGAAGCAGAGAATTATCAAATTCGTTCTAGAAAAGCCAAACGTGTAGTAATTTTGACTAATAAATCTAAATTTTTTAAGAAGTACGATACTTATAATCCTACAGGAGATACTGATAACGNNGAAAAAAAAAAAAATGAATTGGCTTTAATACGTTATTCCCAACAATCGGATTTTCGGCGAGACATAATCAAAGGATCTATACGTGCTCAAAGGCGTAA
GmaAffx.73818.1.S1_at	BG044238	At5g63910	1e-29	Unclassified - Hypothetical Protein NOT Supported by cDNA			ATGTCTTTGAAACTCCCTTTCCTGTTGACCTTGTTCCTCGCACTCTCCCAAGCTCAACCGCATTCCGATGATCCACCGCCGCCANCCTCCTCCAACGTCTGCGTCATCGGCGCTGGCATCGGTGGCTCCTCCGTCGCTCACTTCCTCCGCAAATACTCGCCGNCCTCCACTCCCTCCACCAAAATCCGAGTGTTCGAGCGCAACGGCCGCGTCGGGGGACGCATCGCCACCGTGACGGTGGCGGGCGAGACCTTCGAGGCCGGAGCGTCCATTCTCCATCCAAAGAACCTGCACACAGTGGATTACGTTAAGATCCTGAAGCTGAAGGTCAAAGAGCCGACCGCGTCGGAGGATTCCCTCTCTCTCGGCATTTGGGATGGGAACAAGTTCGTTTTCA
GmaAffx.81156.1.S1_at	CA819098	At1g62870	1e-91	Unclassified - Hypothetical Protein NOT Supported by cDNA			ATATTGCAGCTCATGCCAAACTTGANAGGAGAGACTTTTCTANNGNNGAAGANAAGGANGCAGAGCTGTTTGNCNTGTCNNNNAGTGAGGATGNCATGCTNGNTGANGTNTATGCTGATGCTCCCTTAGTGTAATGTGCTTTTTTACCTCTTATAGAATTGTGTAATTCTAGGATTTATCAGATTCTTTCAAGAACTCTTCTATTATTCCCTTATTACATTTGGTGGGAAACTTTTCATCACTTTGGGGTTGAAATAGAAGGAATATTAGAAGGACCAAAAAAAGCATGTTGTTAGCGACTGTGTT
GmaAffx.77778.1.S1_at	AW185540	At3g11920	4e-11	Unclassified - Hypothetical Protein NOT Supported by cDNA			AACTACTTAGATTCAGCTGACTCAGAAGTATTGTTGGACCTACTTGCTACTTCCGAGTTGAAGGTGACATATCAGCCTTATGACTGGGGCTTGAACTGCTAGCATGGGCTACCAAAGTTCTGTAAATATGTCACCTAGATTACTGATTTTCCGTTATACAGATTACCACCAAAGTAATCAATGTCTTATGTTAACTTTTCTGCCCATTTCACTTGCCTGTATAGAATGGNACACGAGGAAGACAAAAATAGGTCTGAGGAAAATATTTCTCTTATTTCCTGAATTCCTGTTCTATATGTACCGTCTTTCTACATCTTTTGCTCTTTATTGTTTGATGCAACTTATGATGATCCATTACATTTACTCTGCTTGAAGAGCTTGAACTTGTAATGCCTTTCT…
GmaAffx.71032.1.S1_at	AW278168	At4g29110	1e-08	Unclassified - Hypothetical Protein NOT Supported by cDNA			CTCTGCGAGACTCCGACCATGACAACGACCACCAGGTCGATAAGGCGGCGGAAGAGTTCATAAAGAGGTTTTACAAGGACTTGAAGAAGCAGGATTAATTATTTATTTAATTAATTAAGCCTATGCCTATCTACCTTGTTTAATTGTCCATCTCTACGTTCCATATTCTCCCTTTGTTAATAACAAGTGTGATTATATTGTTGATTTACCAACGTTAGTTCACCATCATTTTTGGATATTTCCATGTTTTTGTTGTTGTCCCACTTCTGATTTA
GmaAffx.1252.1.S1_at	CD416461	At3g20510	1e-33	Unclassified - Hypothetical Protein NOT Supported by cDNA			ATCTCAGTCTCAATGCTTTCGGCAAACGAAAAAACTCTTACCTCGCTCTCTTTCTCGAGACCGTTTGTGCANCCATACTAACTTGGGTCATGGGGCAGCGATATTTGGAAACATCCAAGATTATGCCTGCTGGTCTTGTTGCTGGAATCAGTGCTCTCATGACTCTGTTTTATCTCTACAAATTAGCAACTGGTGGCAACCATCTCCCCACCAAGGCTGAGTGATGATATAATGATATATCATATATTTGCTTACTATAATACAGATATGTTGGTTGATCTGCATGCCTTAGATGGTTAAGATACATCATTGTACTTTAGTGATTTCAAAGTATGGAACCAAAGATAGTTGTTGTTGTCGTTGTTGTTGTGCTTGTCTTTATACACGTAGGAGAATTGG…
Gma.9882.1.S1_at	AI460435	At2g31940	4e-15	Unclassified - Hypothetical Protein NOT Supported by cDNA			CCTTTGCAACTATGGAAGTGCTGGAGGGGTCATGTCTACACTGATTCCTTTGCCAGAGAGAGAGTCACTGCACAGAGCAGGTGGAACTCCTTGGGGTGTTGGGTTGGTTCTTGTTCTTCTTCTCTTCATGGTCTCTTACCAGTCTTCTTTCCAAGAACGTTGGTTTCCTATCCTCACAAGGTGAAAAGTGTGGGATTCTTGGGTTTTTNNATCCGTAGAAATCAAAAACAAGTATCATGATTTACAACAAAGACTCGCACACCCTACTTAACTAATTAGCTGAATCCTTGATTGGAGTTCTTATTTATGAGGTAACATGACATGGCATGGAACTTTGTTTGTAATTACTGTAATTTAATTTAGTGAGTTCTCAGGGTTTTTCATGAAATGAGATTTCAC…
Gma.8066.1.A1_at	BQ611504	At1g54170	2e-16	Unclassified - Hypothetical Protein NOT Supported by cDNA			AGTATGCCAGGCATGCCCGTGGGTATTGGAATTGGACCTACTTTTGCTGGGCCACAACCTATCATATATAATCCTCAGGTAGCACAAATGCCGTCTCAAGGATATTTTCATCCGAATGCACCCCAGTATGGACAGCTTCTTGGTCATCCTAGGCAATCTTTATACATGCCGAGTTACTTGCCTGAAATGCAATACAAGGGACGAGATTATTGACGACTTGGCTATTCGTATTCTTGTTGGCAAGTCAAATCCTTGCTTGAAAAGAATAAACTAAGTGGTTGTCCTGAAAAGTTTTAAACGAGGATATCTGCAGCTGATGGAAAAATCTCTAAAGGCTTATATTATATATTACTGCCAGGTTCGCTAATTCTGGGATATAATTTTATGACCTTGTGTTAA…
Gma.8160.1.S1_s_at	BI787214	At4g16380	1e-08	Unclassified - Hypothetical Protein NOT Supported by cDNA			TTTAATCACGTCCAATCCAATGTTTTTGTTATTTA
Gma.8864.1.S1_at	AW350534	At5g42220	4e-53	Unclassified - Hypothetical Protein NOT Supported by cDNA			TAAGCTGCTCGAGGGACATTCTGAAACGGACAATGTCTAATTTTAGCTTGTATGAATACATATGCTTCATTGCTTCTATTGTGTTGCAAATCTCAACCTTCCTGAAAGTCCTTCTATTGTGTCCCAAATCTTAACCTTCCCGAAAGTCCTTCTAGAGAACGAGTTTTGCGTGTCGTGCCCTGAATAATTAATCATTTTGACGGACTTCCAGATCATGTGAGAAAATTAGCATACACCACATGCCAGACGGTTGTTTCAAATGTAGCATTGAGGCGTTTAATGGCCTTCCATTGTTATATTTTTTATGCCCCCTTTCTGATTATACCCTCGTTTGGGCTTATTTCGGACAGTGTGGAGGCTTCTATCAAATAGTCTTGTACATCTAGCGCTTCCATTATT…
GmaAffx.40242.1.A1_s_at	BE820856	At3g51120	2e-14	Unclassified - Hypothetical Protein NOT Supported by cDNA			GCAGTGATCGATTTTCTGTGTCCAGAGATCGGGGTTTTCAAGGTCATGGTAGGGAATCAGGTTTTAGTAGAAGCAGAATTCCATATAACAGGCAACCGTCATATGGTGTTGGAAATGGAGGATCATATAGGCCTCTGCCCAAAGGGCAGCGAGTTTGTAAATTTTATGAAAGTGGGTACTGTAAGAAGGGAGCATCCTGTGATTACTGGCACCCATGATTTTAGATTCCATTAGCACTGGTCACACTTGTTTTTTTTGTAATCCTTAACATATCTGAAGTTGGCTCTT
GmaAffx.37013.1.S1_at	AW349979	At5g35110	6e-15	Unclassified - Hypothetical Protein NOT Supported by cDNA			GAATAATTTGAGTCCGGTTCGGTTGAGGTCTTGGTTAACTTTTTTTTTTTTNNATCTGTTGAAGGTCGTCTTGGGATTGTATTGATCATCTTAAGCCATTTTGATTTAGGGGTTCCTGATCAATTCGGTTGGTTCTGAATTGGACGTCCTCATTTCT
GmaAffx.3704.2.S1_at	BI320426	At1g01490	3e-25	Unclassified - Hypothetical Protein NOT Supported by cDNA			ATGCTTGTGTCGTTTGTTAAATACCAAGCTGTGGAAGAAAACATGAGGAAAGGAAGACATATATAAAAATATATATCAAACTTTCTCTATTTGCAATGGAATCAATCAGGTCAATTTCTCTTTCATGAATCCTGGGAGTTCATAATATCAAGATAGAAACAAACAAACAAACTCCTTTGTATATATTTTGGNTGGTGGTGTCTCCTCTAGTTTTGTTCTGGGACATTAGCAATGTGTAGAGAGTAGGAATAAAATTTTGGGAGATTTGTTTTGACAATGATCACAAATGTAATCATATACTATTATGTTAATTTCCTTTTTTTTTTTTTAAGTTGCTGCCTGCATGTATACAGTATTAGTGGAATCAGCAATTAGTAATTTTGTACGTTGCTGATGCCA…
GmaAffx.2818.1.S1_at	BE800363	At1g76850	1e-74	Unclassified - Hypothetical Protein NOT Supported by cDNA			GATGCTGTTGACAATCCAGGACACAATCGTCGGCCAACTCGTGGTAGTGAAGATGCACTTGCAGATGATAAGCAACAAGGAACAACTGTGTCACCTGATGAGCTCATTTCTCTTGCACAGCAGTACAGCTCCGAGNTTCCTTCAATCAGAGCTTGAGAGGACACGCATTNAACACAGCATGCTTTGCGGAATCTTTTCCTTTGGACTCTGTGCCAGAACCAGCCAAATCTGCCTACTCTCCCTTCAGGAACTCAATGGATTCTCCTAGCAGAAACCACAGAGGTACCTACAATACCGGAGCCTCAAGCTTCTCTCGGCATAGACATTGATGGTTATAAATTAGCTCCCTTATTCTTTTAGTTTGTTTGCCTATTGTATTTATTGTAGTATATTTTTGGT…
GmaAffx.3108.2.S1_s_at	BI967604	At2g38360	1e-63	Unclassified - Hypothetical Protein NOT Supported by cDNA			GTCCGTCAGATCAACCACTCGTTATTCTTGGCAGAACTTTTTCAGATTTCGAAACCCTAGCGCTCCTCTCCGCCTTCACCGTCTTCGTCGTCTTCCTCACCAGCGTTGGATCTGTTCTCGTCTCCGCTCTCATGCTTGGCGTCGCCGTCGTCTGCCTCCACGGCNNGNNNNCNNCGNNGCCGGAGGATCTGTTTCTTGACGACCAGGACAACTCTCAGGC
GmaAffx.26598.1.S1_at	CD393521	At5g01140	5e-07	Unclassified - Hypothetical Protein NOT Supported by cDNA			CACACTCCTAATTATTGGTATGGCACTGTAGCAGGGAATGATAATAATGAGGGGCGTACAATGATTTCNAAGAAAAAGGATATGTTACAAACAGCAAAANAACTGAAACTTTTTGACCCAAGATGTTCTGATGGAGCAAAAGAACCTGGTGTGGGATTTGTGAAGAGGCCNTGTCTATTTGTTGTGANGGATGATCTGGAAGTGANACAAATGACAACTACTTCTAGCATTGAGTATCTGAANNATNNNGGNGANNANGTCAAGNTGGGTGATTTGGAGGAGCATTTGGTGGAAATCAGGTCAAATGAGGTAATGAACCTGTTGAGGGCTTCTTTGACATCCAATGAAGCTACTTTGACACGGAGCCTAGGCTGNCTATTGATGAAGTGGAAATGCCAA…
GmaAffx.90087.1.S1_at	CF805812	At1g01170	2e-11	Unclassified - Hypothetical Protein NOT Supported by cDNA			ATTGTGAGTTAATTGATGCACCTTGTTCATGGGATATGTTTCCATAAATGATGATAATGTTTGAGGTAAAAGTCTTGCAGTTCAATTAGTGTTTTGATTTTTAATCATGTGAATGCTTACTTGCTAA
GmaAffx.90087.1.S1_x_at	CF805812	At1g01170	2e-11	Unclassified - Hypothetical Protein NOT Supported by cDNA			ATTGTGAGTTAATTGATGCACCTTGTTCATGGGATATGTTTCCATAAATGATGATAATGTTTGAGGTAAAAGTCTTGCAGTTCAATTAGTGTTTTGATTTTTAATCATGTGAATGCTTACTTGCTAA
GmaAffx.90005.1.S1_at	CF805730	At4g29735	8e-17	Unclassified - Hypothetical Protein Supported by cDNA			GATATCCGACTCTAAGGTATGTTCTTAATCTATCGATAACAATGTTGGTTGTGTGTAATGCTCAAGAAGATTATGATATCTGAGATAGTTTTCAAGCATGTTTTTCGGTAATTTCTATATGCTGAATGCAGATGAATATCATGTTTGATACTCTT
GmaAffx.90031.1.S1_s_at	CF805756	At3g27090	6e-06	Unclassified - Hypothetical Protein Supported by cDNA			GGATCTGTTGGACCTATGTGAACAAGCTGGTTCAGCAGCATAAGCAAGAATCAAACAAAGAATGAATGTGCAAAATAGGTAGGTTTTGGTGTGCCAGCTGTGTGGTTTTGGCAGATTTTCCGTGAAGCGTAAGCTTGGAAAGTGAATCATCATCATGTTTTGGGGGAAGTAAAGGGAGCGTGTTGTTGAGAGTGAGAGACCCTTTGTTGGTGAATAAATGGTTGTTGTGGTATCTATCCCCTGGAAGATGCTTTGTAGCT
GmaAffx.90190.1.S1_s_at	CF805915	At5g46020	2e-39	Unclassified - Hypothetical Protein Supported by cDNA			AATTTACTCCATATTAGTAGGAGGATATGTACTCTTACTACACTTCAACATTATG
GmaAffx.89005.1.A1_s_at	CK605678	At4g34700	9e-47	Unclassified - Hypothetical Protein Supported by cDNA			ATCTGATTTTTTCTTGCATCCTTACAATGAATAAAGGTCTGCAATCAAACTGTTCTGTATTACTAGATTGTGGATTAAATGACCTTCATTTATGTGATGAGCATAAATTGATACAGATTGAGGAGTCCATCCCTGCTTATGATGTTGAAAAATTTTATCACCTCCGAACCAGATGGTACCTTGATTTGAATGTTTTTAAGATTCTGTCATTGATACTTGTTAGTGCGTGTCTGAAATTTTACATAAAACTAGTTGCATAAATTGTCTGC
GmaAffx.88771.1.A1_s_at	CK605912	At4g37830	1e-36	Unclassified - Hypothetical Protein Supported by cDNA			GGTGCGATCGGGTTTTCTTCGTAGCGCCCTACGAGGAAGAGCTCGTAGCTCTCAGGTTCCCAAGCGAAACTTTGCTTCCTCTGGTCATCACGATGATGCATATGAGACGGCCAAATGGGAGAAGATTACATATTTAGGCATTGTTGGTTGCACCGGTTTAGCCGTTTATAATCTATCAAAGGGCCACCCGCACTTCAAAGAACCTCCTGCATACCCATATTTGCATATCCGCAATAAGGAATTCCCCTGGGGTCCCGATGGACTATTTGAAACGAAGCACCACGACGAGCATTAATGGTTTAATGAAGGTATTTGTGACACCGGTGGGCTTTGGATTTGTCAATGTTCAAGAAATAGTGATGATTATTGTGGTTTTTGAAATGTGATCTAGAACTTGCA…
GmaAffx.89368.1.A1_s_at	CK606550		3e-05	Unclassified - Hypothetical Protein Supported by cDNA			CCATGTCGACCAAGCAAGGTGGAAAAGCTAAGCCTTTGAAGAAACCCAAGTCTGATAAGAAGGATTACGACGAGNTTGANNTGGCTAACATTCAGAAGAAAAAGGAAGAGGAGAAGGCGCTAAAGGAGTTGAAAGCCANGGCGCAACAGAAGGGANGCTTTGGAGGTTCTGGNCTCAAGAAAAGTGGAAAGAAATAAGGGCTCTTTATCATGATTGTATNCATNCAATATTGAGCCCTGTANNNNNNNTTNNTACCATGATAACTTCTNNTNTTATTGTGGCCTNCTTTATTGNNCTAATGTNNGTACTGAACTGAGGTATNTCGTGATGTAAGCTGCAANAAGTTANTTGTNTGTAGCTTTATTGTNTNNCCCTTCATGGGGTTCTGATAATTACATC…
GmaAffx.89425.1.A1_s_at	CK606255		6e-19	Unclassified - Hypothetical Protein Supported by cDNA			AAGGGCGTAGTAAGCGACGAAATGCTTCGGGGAGTTGAAAATAAGCGTAGATCCGGGGATTCCCGATATAGGTCAACCTTTCGAACTGCTGCTGAATCCACGGGCAGGCAAGAGACAACCTGGTGAACTGAAACAT
GmaAffx.90956.1.S1_s_at	CF806681	At5g53905	0.003	Unclassified - Hypothetical Protein Supported by cDNA			TGTCCTTGAGTTCTAAGGAGACAGGAACCTACGTCTGGTGGATGAA
GmaAffx.90557.1.S1_s_at	CF806282	At3g23600	8e-69	Unclassified - Hypothetical Protein Supported by cDNA			AGGGCCTCAATGCTGTTCAAATCCACCAAGCTTGAACCCCGGTGGAGGAGTTGGGCATGTGGACAAAGTGGGTGGTGTTGATTCCTATTTCACTGGATCTCCTCACTCCAAACTCGCTGTTCTTATGCTCTCCGATGTTTTTGGATATGAAGCGCCAAATTTAAGGAAGCTTGCTGACAAAGTTGGGGCTGCTGGGTATTATGTAGTTGTTCCTGACCTCTTGGATGGCGAACCCTTTAATCCTCAGAATTCGGACAGGCCCTTTCCTGCTTGGATAAAAGATCATGGACCAGTGGAGAAAGGTGCTGAAGCTACAAAACCCATAATTGAAGCCTTAAAAAGTAAAGGTGTTTCAGCTATTGCAGCTGTTGGTTTTTTGTTGGGGTGCAAAGGTTGTGG…
GmaAffx.91283.1.A1_at	CF806794	At5g16110	5e-21	Unclassified - Hypothetical Protein Supported by cDNA			AAGGGGGACACATCAAGGAGAAAAGAAAAACGCAAGCAAAAAGTCTTGTTCTTCTCTCTTGTTAGGTTTTATATGATGGGGTCTTTTAGATTGAAACTTTCATGTGAGTTTCATGGAGAGTCTGTAACTTATATGTAATTTGAAACTCAGCTCCTCCTTTTGTAATTGGAATGGTGGAGGAATTTGAGGATTTATCTTTG
GmaAffx.91283.1.A1_x_at	CF806794	At5g16110	5e-21	Unclassified - Hypothetical Protein Supported by cDNA			AGGGATAGGCGCAACTGCAGCATTTCTGCTGTTGCTTAATTCAATTTTAAACNANGAAAAAGAAAAGAAAAGNGGATTAAAGAATCACCAAAGTTCTAAGAGCAGAGGAGATTTTTGGAACTGAGGAGCTAATCTTAATTTCAATCTTATTGTATTATATCTATATGTATATACCGTTGTTCATGAGTTAATTAAGGTGTCATGTATAATTGAGAGAAGGTGGGAATTTTATATTCTTAGTTTTATCCTTTTTGAAGAATAATAAAAAAAGGGGGACACATCAAGGAGAAAAGAAAAACGCAAGCAAAAAGTCTTGTTCTTCTCTCTTGTTAGGTTTTATATGATGGGGTCTTTTAGATTGAAACTTTCATGTGAGTTTCATGGAGAGTCTGTAACTTA…
GmaAffx.93002.1.S1_at	CF808727	At1g16170	2e-12	Unclassified - Hypothetical Protein Supported by cDNA			CTGAGTATAGGTGACGTGATGAAATCCAAATATAGTCTCCGGCTACTGTATCAATCAGTGTGAC
GmaAffx.92635.1.S1_s_at	CF808360	At5g64400	4e-12	Unclassified - Hypothetical Protein Supported by cDNA			GGATCTATGCTTGGTGGCATTGGTTCAACCATAGCTCAAGGTATGGCTTTTGGCACCGGACGTGCAGTGGCACACAGGGCTGTGGATGCAGTCATGGGTCCTCGTACCATTCAACATGA
GmaAffx.9844.1.S1_at	BM522926	At5g24105	6e-13	Unclassified - Hypothetical Protein Supported by cDNA			CTTACTTACATCATCCATTAACCCATTCATCTATTCACTATGTTTTTCTTCTCTGTTGTATTTATTTCTTCAACTCTATTCTTTCAATGAAATTCTTTTTTATTATGTGTATGTATGTCTGAGTTTTCGTCCATCTCTATCTGTTTATTTCCGCAAATTAGTTATTTTCAT
GmaAffx.9859.1.S1_at	BU761211	At2g36310	1e-101	Unclassified - Hypothetical Protein Supported by cDNA			TGCTTGGACAGTGAATCTCGAGGAAGTTCTTGATTATATCAGGGAGCTGGTGATGAAACCCTGAAGTATAGGCATTTGTACTACCCTTCTGACAGACAAAAANCATTGGAAAGTGATAGGACGATAGCTTCTTATTTGCAAAAATATGCATAAGGTCATTTTCTTTATTTCATTCAAGGTCACAATGAGTTCTTACCCCGTTTAATATTATAAAGTTCATGTACCAATGAAATTCTCTTTACATGAACTTATTTGTGTTTGGATTTCGCTACTCTTATTTGAGAAGAAAGCAGTCATTCTTTACTTTTCCTACCTCTGAACTTGCATGTTGCTTCTTAGTTCTTACTANGNNATTATAGAATTTCGGTTTGAAAATCGCACTAAAGACTTCTTCGCTTG…
GmaAffx.93424.1.S1_x_at	CF809149	At4g05050	7e-98	Unclassified - Hypothetical Protein Supported by cDNA			TCAAAACCCTAACTGGCAAAACAATCACGCTAGAGGTGGAGTCCTCCGACACAATCGATAACGTGAAAGCCAAGATTCAAGATAAGGAAGGGATTCCTCCGGATCAGCAACGTTTGATCTTCGCCGGAAAACAACTCGAAGACGGCAGAACCCTCGCCGATTACAATATCCAGAAAGAATCGACTCTGCATTTGGTGCTTCGTCTCCGCGGAGGGATGCAGATCTTCGTGAAAACCCTAACCGGCAAAACGATTACGCTAGA
GmaAffx.93086.1.A1_at	CF809241	At5g11970	7e-21	Unclassified - Hypothetical Protein Supported by cDNA			GTTACTTATAATTAGGTCCTCGAAGATCTTCTAATCTTCCTTTGA
GmaAffx.93063.1.S1_at	CF808788	At5g17190	2e-31	Unclassified - Hypothetical Protein Supported by cDNA			GGGATTTTCTTATTGTTGCGCTCAGGGATCCAATTC
GmaAffx.26782.2.S1_at	AW598515	At4g12340	1e-24	Unclassified - Hypothetical Protein Supported by cDNA			AGAGTATAAGCTTCCTAACCCAAAGCCTGAGCCTTGCATGGCCGAGAGACTTGCGACCTTATCATGTTACAAGGAACATATCAAGGACCCCTTGAAGTGTGCCAGTCTTGTTACCGGTTTTGCTGATTGCCTGCGTAGGTTTGGCCGTTTAGGTGACAAGTAAGTTATACTGAGAAGTGGTTTAAAAGGAAATTCGTGTGTGCCNAATGCAAATAATTACTAGTGAACTACATACTGACAAATACTCATTTGTTACGGCCAATTTTGTGTAATCTCATTCCCAACATTAAACTACAAGCTCAGAATAAGTGACCTATTCGTCGTTTGGAATCTGAACATTTTCTGTTATTTTCGTGCCCTACCGTTCTGTCAAGTTGGCCAGTTTTATATANNCACACA…
GmaAffx.25785.1.A1_at	CD395209	At2g35470	2e-11	Unclassified - Hypothetical Protein Supported by cDNA			CGCACGTGCTCCTCGCTGCGTATTTCCTTAATATATTCTTGTTCCCGGTGTACATTGCGATTTGCCTATATTTATCGCTCAGAAAGA
GmaAffx.20418.1.A1_s_at	CD411480	At1g26920	0.0005	Unclassified - Hypothetical Protein Supported by cDNA			ATGCTTTCTTGCAATCTGAACTCTTCCTAGGGGGGTATTAGGATAGTGGAAATTATTATTACCTGGGTGAAATTCTGGATGAGAAAAAAAAAAAGAAAGGTGATAACATAGTATGTAGGCTCAAAGATGGAGGAATATTTTTTAAAATTTTATTTAGTTTGATTTTTTAAGGCCTCTTTTGTAAAGATCACGGGAAGTCTATGTTGTCATTGCTTATTATCTACAGTTAGGCAGTGCCACTTTTGCAGGTCAATCTGTACTTCCGCACTGGAAAAATT
GmaAffx.2483.1.S1_at	AW349775	At1g72150	3e-18	Unclassified - Hypothetical Protein Supported by cDNA			GTGCAGAGTTTGTGCCAACTTCAGAGGGAAGNTATACTGTGATCATCCAGAAGGCNAGAAAGGTTGCTTCATCAGAAGAACCGGTGCTTTGCAACAACTACAAAATTGGTGAACCTGGGAAAGTGGTTCTCACCATTGACAANCAAAGCTCTAAGAAGAAGAAGCTCTTGTNCCGCTTNAAGGTCAAGCCTTCTTCTGACTGAGAATCTTATCATTGTTATGTACATCCATAAGGGAGATGGAGAAGAGCAGTGCCTACATGGGTTACTTGATTACATTCTTGCATTCACTTCTATCTCCCAAGATGTTCAAAGCTTCAAAGATGTGGACTTTGCTGCTAGAAGAGGAAAGTTTTAATGATAATCGTGATCATGTGTTTCAATCATATATAATTTTTCT…
GmaAffx.16533.1.S1_at	AW832630	At1g16240	5e-84	Unclassified - Hypothetical Protein Supported by cDNA			ATGGACTTGTTGGACTTCAGCGGCAAATTATGAAAGAACAAGACGATGGCCTTGAGCAATTGGAAGAGACCGTGGCAAGCACCAAACATATTGCATTGGCAGTTAATGAAGAGCTGGATCTACACACTAGACTAATTGATGACTTAGACCAACATGTAGATGTCACAGATTCTCGGCTTAGGCGGGTGCAGAAGAACTTAGCGGTTTTAAATAAGCGAACCAAGGGTGGTTGCTCCTGCATGTGCATGCTATTATCAGTGGTTGGTATAGTGGCTTTGATTGTTGTTATTTGGCTATTGGTCAAATATTTGTAATGTATAAATACCCAACTTGGCTTGAGTCTGCTTTTCATCTTTGTTTCTGCCGTGTGCACTAAAGAATCATAATCAGGTTTCCCCA…
GmaAffx.16959.1.S1_s_at	CD486940	At5g53880	1e-07	Unclassified - Hypothetical Protein Supported by cDNA			CCATTTCAAGCTCTCTTTGGTTATTATTAGTATTTTTTTTTTTNNNNGCTTTTTTCTTCTCACCGATATTATATAAGCATGCACAACAAATTTGTGNNNNNNNNNNNNNNNCTTCTTTGTTCCTATAATTACCACTGCCATGATGCATTCCTACTACTGTTAGTTTGAAAATGTACAATGCCTTTGCAAGTAACTTCTTAAA
GmaAffx.3113.1.S1_s_at	BG352480	At1g68590	3e-07	Unclassified - Hypothetical Protein Supported by cDNA			ATTTGTGGCAACAGAGTGGTGGCAACTTATCCTGAACTCATTCATGTGCCAACATATTTCAATGATGTTTTTCCTTTTCATGTTATGTTTTTCTCTTGTACNGCATTTTCGNCTGTGCTCTTCCTCTTTCTATGTATGCCTGGCATGTGCTTGATTATTATTACTATCAACTAATCCATAAATTCTTTCTCGTGA
GmaAffx.34453.1.S1_at	BU544114	At1g05710	1e-37	Unclassified - Hypothetical Protein Supported by cDNA			GTTAAGCTGCTTAGTGCTCCATACCTTGAAAGTTCACCAGCAGCCAAGATGCAGGGTGTGGAGCCATGCAGCCTGAGGAGTAGAGGCTTATGTCTTGTTCCTGTGTCAGTTACTATTGGAGTTGCTGAGANCAATGGTGCANATATCTGGGCNCCCATTAAGACTACTACTTCTCCTAAATTTGAGAAGGATGTCTCCCAATTTCATTGANNAATTTTCTCANCTTTNCAGCCTAAAGGTTGCTAAAGTTGCT
Gma.8916.2.S1_at	CA802688	At2g33220	1e-71	Unclassified - Hypothetical Protein Supported by cDNA			TCAGCCATCTCTATCAGAATTTGGTCTGCTTCTTGAATGTTCTTTACATGCTGGTACTTTCTTTTGTCCAGTCTCTAAAATAAATTTGTATCTGAAACATTTGTAGCTGCTTTGCGAAA
Gma.8672.1.A1_at	BU764295	At2g46080	1e-06	Unclassified - Hypothetical Protein Supported by cDNA			GAAGTCGATAGCTTTTTCCAAGTGGTCTTGACCGGTCGTGATACCTTGCTATCTAGTCTGAGGTCAGGTGCAACTTTCATTGACAGCATTCAGGCGGGTAACAGAGATGCACAAATAGTCAATTGAATGTGTTGCAGCCTAACTGTGGTAGATACTGATGGATCTAGGTATTGGGTTTCATGTTTTATGGTTGATGGTTTTCAATCATGTTTGGCTTATTGTATTCAAGTTAGAATGAGTAATAGGTTATATGATTATATTATTATGGTTCTGAAATGTATATTTCTGATGTTCTGTTTCTGTGTAATGTTATATGATAAAATATATATAAGAAAGTTGCTTGTGCTCACAGA
Gma.9274.1.S1_at	CA819534	At5g03340	5e-20	Unclassified - Hypothetical Protein Supported by cDNA			AAAGCAGCTCATTTTGAAGAATCAATGAAGTATGCACGAAGGAGTGTAAGTGATGCTGACATTCGCAAGTACCAGGCTTTTGCACAAACATTGCAGCAGTCGAGAGGGTTTGGATCTGACTTCACTTTTGCAAATACCAGCTCTGTTGGTGCTGCTGCTGGTGCCGGGGCTGCATCCGACCCTTTTGCAAGTGCTGGTGGAGCCGATGAAGATGATCTTTACAGTTAGAGGTCAACCTGTGGCTTTTGTTTATGAACGGCAATACTGCCAATTTATGTACTTCTCATTTTCTGTATGAAGTCAGTCTTCAATTGGATTTATTATTGTCGTTGGTCTGTAAACGGCACTGGTTCATGTGGTGTGAGCCTCATTGAAAGTGGAAA
Gma.8294.1.S1_s_at	BM140009		6.1e-33	Unclassified - Hypothetical Protein Supported by cDNA			TGAACTTGCCACAAACATTGTAGGTGAAAAAGGATATGAACTTGGCGTAATTTCCCCTTGTAATATCCTGTCTTGTTGCATGTTGCATGTTGCGGAGATCACAACTGGATTGTACTGTTATTTCAAAAATAAAGGTTCCATATAACTATTCTATCACTATTTTGTTGCATTGTTGCTGTTAGAGAAGA
Gma.9631.1.S1_s_at	CA852037	At3g15353	1e-08	Unclassified - Hypothetical Protein Supported by cDNA			ACTTAAGTTCATTCCTTGTGTTTTGCTTTCTTCCTCAAAACCAAACATGTCGAACACATGCGGCAACTGCGACTGCGCTGACA
Gma.9951.1.S1_at	BM085764	At4g34700	5e-44	Unclassified - Hypothetical Protein Supported by cDNA			TTTTTTGCACCCTTGCAATGAATAAAGGTCTGCAATCAAACTGTTCTGTATTCACAAATTGATACCGATTGAGTCCATCCATGCTTATGATGTTGAAAAATTTGATGTCCTCCGAACCAGATGGTACCTGGATTTTACTGTTTTTAAGATTCTGTCATTGGTACTTGTTAGTGAGTCTGAATTTTTTTACATAAAGAAAACCAGTTGCAT
Gma.9659.1.S1_at	AW349623	At3g07910	6e-20	Unclassified - Hypothetical Protein Supported by cDNA			AAGGTGCCTGGACTATTGAAAATTAGGCATATTGGACAAACTACACTTGGAAGTGCTGCTATTTTTGGTCTTTTCTTGGGTGCTGGAAGCTTGATACATTGTGGGAAATCATACTGAGGATAAANATNNTNNCCNCCCCCCNNNNNNNTACTTACAGTGNTTTGGTTNGCTNCNCTTGTAAAGTATGAGTAGAGCAGGGATTTNCTGNTTTTTNNGTTTTCTGGATCATGGAAAANGTTTNATGGCACTACTNCTATGAAATTTNNCATTTNTTTCTCCCAANANANTANNACTGTTGAAATTTCTTTGCTGGGGCTTTCCT
Gma.9722.1.S1_at	BE823732	At1g05720	4e-56	Unclassified - Hypothetical Protein Supported by cDNA			AGTCTGCATGAGGAAACTTGTTTTCTATCCTGAAGTTGTNNGCTTTATTGAAGATGAAAAAGATCAATTTCCATCAGTNAANGTTCAATATGTTTTTAACTCTCCACCAAAGCTAATTATGCTGGATGANGNGGGTCAGCAAAANGAAACAATCAGNATTGATAATTGGAAACGTGAGCATATACTNCAGTTCCTGAGAGAGAAGGTGAAGCCTCTAGCNTCTGATTGAGANNATCTTTAACCCATTCTCTGGCATGCTCTGGACTCGTTCCCATTTAACAGAAAAGAGTGGGAGTATATAGTGTGGCTTAGACAAGTGAATTAAACTTGCCCTGGGTTACAAGTGACCTTAATAACATAAAATCATCATAATTTGGTCAGTTTAGATAATTCTGGGTT…
GmaAffx.1301.90.S1_s_at	BU764871	At3g11210	3e-06	Unclassified - Hypothetical Protein Supported by cDNA			GATTCACCATATTATCCTCCAAGTCCTGATGGAACAACAACCATAAATGTGTCTCATATTATCTCCCGAAGGTGTTTGCAGTGGGATATATAGTACTTTATGTATTTATATTGCGTACCATATAAGAGGCTCAATTATGTTGTGTGGAGTGGAGCTCTTGGAAAAGTGATATTTTCCCTACCCCATACGTTTTGGGGGCGCTTTAATTATTCTATTCTAGTTTTCATTTGTTA
GmaAffx.77292.1.S1_at	CA934970	At1g14060	1e-18	Unclassified - Hypothetical Protein Supported by cDNA			TCATAGGGTGGGAAAATTGCGTCCAGGAGGCCGAAAACAACAACGAGGACCTCCTCGAGAAGTGCGCCCAGGTCACCGNCGNCTCTCAAGCGCTGNATGGACGCCCACTCCGACTACTACGAGCCCATCCTCCGCGCCGAGAAGCTCGCCGAGGAACAGGCCATCGTCGANNNGNNNNAGGAGAAGCAGAATCAACAACAACCTCCGCAAGACCAAAAGGCCGAGAAGGTTGTTGAGGAAGTAGCCATCATTGAATTGGAGGTGGAAAAGCAAAATTTGCCACCAAACGAGTCCCAACCCCCTTCTCCTTCCAGTCAAGACCAAAAGTGAGACCCCATTTCATTGCCCTTTTTTGCTTCTCTTAACCCACTGTCATACTCATACCTGTACTGTCAATGC…
GmaAffx.70823.1.S1_at	BQ743055	At4g15120	5e-05	Unclassified - Hypothetical Protein Supported by cDNA			AAGCACTTCATTATTCTCCAGTAGGAACACGGGTAGCAGTTTTTTTTGTTTTNGTTTNTCTTTGGTCCGCATGCTGAGGCTCGAAAGTGACATAAAGCAGACAGTTAGGTGCTAACTTGGCCAGAATTGTTGACCANCCAATGTTAAAATACTATTATNNTAATAGTACACTCTTCTTTAGGTTTTTAATTACTTTTATTATTACTACTGTTATTTACTTTTTTTTTTTTTTACTTTTAGNTTTTGTTGTTGTTGTTGGAATTGGGCTCTGCTTCTAGATAGCCCTGGATGGCGCAACCAATCCCAATGC
GmaAffx.69591.1.S1_at	BM271258	At5g21070	0.0009	Unclassified - Hypothetical Protein Supported by cDNA			GAGGTCTGTGTTTAGTAGGAGTCTTGACCCTACTTTTTCATGATCATGATCATGAAGTAGTTTCGATTGGACATCACTCACATTCACATAGGAAGATTATTTCCTTNTGAGATATATAAATGTTTTTGNAATTACATGCTTATGAGCATTGTCNCGGTATTGTTTTTATTTTGTATCNGAAGGGAAAAAGAAAAAAGAAAAACAGATGTTGCTGCTTAGGAGAACTGATCATCTTGGTCTAGTAAAAGTCGTTGTATACTGAGTTTTCAATGTGAAA
GmaAffx.68762.1.A1_s_at	BE822821	At4g32930	5e-11	Unclassified - Hypothetical Protein Supported by cDNA			TGATATCCAATCTTCGAGCTACTTTTGAAGTGACGAAGTAGAGAGAACTGGTTTACTATCTGAATATTTTCTTGATGTATAAAATTGACTGTTTTCTTCCTAGATGAGCTTTTGAGCTCTGGGTTGCATCATAATTAGGCATGAAATTTGTGGGATCTTCTAACATTACATGTTA
GmaAffx.72744.1.S1_at	BU550658	At5g14600	9e-94	Unclassified - Hypothetical Protein Supported by cDNA			TTTGAGGTACTCTTACGCACGTATGAAGTTCGGGAAGAGAAAATGCAAAGCTTATGTGGGGATAGCAATGGTTCTGTTCCTAGCAAGAGGAAACAATGCTCTGGTGGAAGCTATGTACTAGGCAGCAGTCCATCTACTTCTTCTGTCATGGCTAGACCTTGTGGTGAAGCTCGAGGACACACGGGCTATTTGACATTTGCAAGAGTTAAATCACTCTCATGAAGAGTGCTATCATATCCATCACATTCGTGAATCTCCTTTCGATTTGAGCCTCATGCNGTAGGTTGTTGTCGTTTGTTACAATACAGCATGCCTATGATCCATACCTTGCTACAAGAAGCAAGGCCTGCCTCTTTTTTGCAGATTAGTAATCATTGATAAATATTTTGTGGTGCTTCA…
GmaAffx.72771.1.A1_at	BG511599	At1g10240	3e-70	Unclassified - Hypothetical Protein Supported by cDNA			TCAGCTTTTGTGTGGTGCCTCACAAGAAAACCATCTTCAATTGAAAAAGACGCATAATGTGCAGCCAACACAAGTTGTTCTTGAAGCTTTGAGAAGGCAAAAGGAGTGAGGATTGTGGCGGCGTGTGATTCCATGGGGGCCCCTGTTTTGAGGCAAACATTTTGGAGATTCTGCTGCATGGTTTGTTGTTATCCAGTTTGATCTTTAAAATCCACAGCAACAGCANNNNNNNNNNNNNANNNNGNAANNCNNGTNNGNNNNNNNNGAAAAAATTGAATGAGTAACTGTCATTTGTTGTGTATCAAGTCAGGCATATAGAATCTTCTGCTCCTTTTCGCCTTTGACTTTTTTGGCAGGGCTCCGTGTAAAGGTAGTGTATATTGCTTGGCGTTTGATCCT…
GmaAffx.72806.1.S1_at	BG651678	At1g31760	1e-08	Unclassified - Hypothetical Protein Supported by cDNA			ATTTGCAGACACTGTTGCGTGGCAGAAACAATGTTGGTTTTCCTGAGATTGCGAAGATACTGTCTCCGGAATTCGGTCATGGCGCGATTAATGTGAAGGACAGTAGTATTGGGGATTCTTCCGGGGACGCCACCAAGGGGAAAGGCCCTAAAAAAAAAGGGAAGTCCTCTAAGAAGTAGGATAGGACTTGCACATGCTTTGAAATCACCTTCTTCTATGACCCAATTAAGTTTGATGTTTGAAAGTTGAAAATTTTAGCCTGTTGTGACTGGTTTGGGTATTGNNNTTGTTGTCTTCACAATAATTTTAGCGCATCCATTACTTACATGATATGCTTGTTCATTGGTTCAAGGAACAGCAAAAACTGTTTTGTTTTTTGATCTTTTGTTTGTTGCCATA…
GmaAffx.73770.1.S1_at	BM523729	At5g16250	7e-06	Unclassified - Hypothetical Protein Supported by cDNA			AGTTGTTGCAGCTGTTTTGATGATAATCTTTCAAATATGTTGATTCGTTGGAGAATTGGATGCTTTTTTCTCCTGATAGAGATATATGTGTGTGTGTTTGTGTTGGCTATCATCATTATGTAATTAGTTGTGTGTGTGTAGTTATTCTTTAGATTCATCTTATTTGTTGTTGGATTATTATTACTTCACATATCATCTCCTTCTTGTTAAGCCAGA
GmaAffx.83657.1.S1_at	BI316738	At4g21570	1e-66	Unclassified - Hypothetical Protein Supported by cDNA			CATGGCAGTTTGTTGTTGTCCGTCCAGTATGTTCTGTTCTGATGATTGCATTACAGCTAGTCGGGCTGTATCCAACTTGGTTGAGCTGGGCATTCACCATCGTTCTCAACATATCTGTGTCGTTAGCCTTGTATTCTCTGGTGGTCTTTTACCATGTGTTTGCTAAAGAACTGGCACCACACAAACCTCTAGCTAAATTCTTGTGCATCAAAGGAATTGTTTTCTTCTGCTTTTGGCAGGGAATGTTGCTGGAGCTTTTAGCGGCAACTGGTGTCATTCAATCTCGCCATTTGCGGTTAGATGTGGAGCACATTGAGGAAGCAATGCAGAATATTTTGGTATGTCTAGAGATGGTTATCTTTTCTGTTCTTCAACAGTATGCTTATCATCCTGCACCAT…
GmaAffx.85044.1.S1_at	AW734534	At3g18760	1e-15	Unclassified - Hypothetical Protein Supported by cDNA			TCAAACATTTGCTTACTTACGGTACTAGGTATCAATCAAACATGACCAGTGGGCTCGAACATGTTATTTCATAAACTCCGAGCTGTCTCT
[truncated: 201 more rows]
