# Supplementary material for: Microarray Detection Call Methodology as a Means to Identify and Compare Transcripts Expressed within Syncytial Cells from Soybean (Glycine max) Roots Undergoing Resistant and Susceptible Reactions to the Soybean Cyst Nematode (Heterodera glycines)
Source: Hindawi journal article supplement (doi:10.1155/2010/491217), 2010-01-01
Supplement: f13 [file 491217.f13.xls]

## Sheet: Sheet1
Probe Set ID	Representative Public ID	At Gene ID	At BLAST E-value	Functional Category	Subfamily	Gene Family	Sequence
Gma.10644.1.S1_at	BM092812	At1g79650	1e-55	Cell Growth & Division			GATCAACCTGAGCAAGATATGCCTCATGCCATCAATGTGACGCCAGCAGANCAGGAGGCAATTGGAAGGCTTGAGGCTATGGGATTTGATAGAGCCTCAGTCATCGAGGCATTTTTGGCATGTGACCATGACGAGCAATTGGCAGCCAACTACTTACTGGAAAATGCTGGAGATTTTGAGGGTTAAATCACTAACCTACATTGATTTGTAGTTTTGTTTGAGGCTTTATTTATTTATTTATTTTTGTTGGGGGGAGCATTTTTTTGTACTTAATGTGTCTTGGCAAATTTACGTGGATAGAGTTTTGGATTTGGTTTGACGTATTAACCGAGACAATGGACAAAAGTTACTCTTGATATTAGAATGGTTTAGTTTACACAACAGTGTTTCTGGTTATCT…
Gma.11556.1.A1_at	CD401368	At5g08080	3e-08	Cell Growth & Division			TATCATAGTTGTGGGTGTTCTCAAACCTTGGAAGAGTAGCTAGGGTGCTTGAGTGTGGCCCTTTACCTTTTGTCCTTATATAAGAGTTGACTTGGTTGGGAAAGCATATGCAATTATGCATGTGTGTCAAAGGGACATCTTAGAGAAGGATTTTTAAGCTTTTATGTTGTGTGATTGAGATGCTTGTTTTGTGTGGTGTGACT
Gma.13541.1.S1_at	BM092024	At3g14890	2e-11	Cell Growth & Division			ATATGTTGTAGATCCTTTTTTGTTGGTGATGCAGCCGGGAGAGAATCAGATCACAGTGTCGCTGATATTAAATTTGCAGAGGCCATTGGTTTAAAATTTTATGTCCCAGAAGAGTACTTCGCTTGAGCATCTAATTAAGTCATTGGTTCATAGGAAGGTTAAGGTCTTATAGGTGTCCAGTTTNGTTTGAAAGTGACATTACCAACTGGAAGTATGGAACAGAAAGGATGTAAATGAATTTCTGGGCAATCCTAAACCCTAAACTTAACGCATAGTCGACTAA
Gma.17633.1.A1_at	BI974471	At3g11450	8e-51	Cell Growth & Division	Cell Cycle		CTGCCTCAACAAATAACGTAGAAGACTCTCAGAATAAAAGTACAGNATAATCAGAACTCCCCTGCTAATGGAGTTTCTTCCAGTTCAGAACAGGATGTGTGGTNTGCAGTGCAGGAACGAGCGCTGGTTCAAGCTTTAAAAGTCTTTCCAAAGGAAACAAGCCAGAGATGGGAGCGTGTTGCAACTGCTGTACCTGGGAAGACTGTGAATCAGTGTAAGAAAAAATTTGCATTGATGAAGGAGAGTTTCAGGAACAAGAAAAGTGCAGTCNAATGTTCTGTTGTGATATTTTAGATTTCACTACTAATTTTTTCTTAAGAGTATAGGCTAGAGTCGAATATCCATACATTTCTAGTTTTCTTATCGCATTGATTGCTTTTGATACCGTACTTTGAACTT…
Gma.18102.1.S1_at	CD395085	At5g16270	1e-24	Cell Growth & Division			TTGGCACTTTGGCTGGAATCTGCAGGGTTGGGATAATATTTTCAACATTTTCTCCCCGATTCTAGCTGTGGCTTTTCATTTATAATTTTTTGGAGATAGGATTTAGCTGTTCAGTTTTAGTTCTTCAATGGCCGGGGGGTTGAAGTGGGCACTTGTACCATCCTATTGATTATTCTGGGTCCTAATGTATATATTTTTGTAAAATGTCATAATTTGTAACAGACAGATGCTAATTTGTACTGGTATGTTGTTTAAACGCATCCCTCCATGTAAGAATGTNNTGCTTTCTCTAGGCATCAGATTTATGTAACAGAAAGCACCTTGTAATTTAACTGTTCGGG
Gma.2507.1.S1_at	CD409747	At4g24000	2e-84	Cell Growth & Division			CAAATTGATTAGAAGATTGAGCATTTCTTAGTTACCCTACGTATTAGTAGTACATGTAAGCCTTTT
Gma.3590.1.S1_at	AW102235	At1g15130	2e-60	Cell Growth & Division			ACAGCCACCAGCAAACCATGAGTATGGCCAACCAGCATATCCCGGATGGCGTGGTCCGTACTACAATGCACAAGCACAGCAACCTGGTTCTGTTCCTCGGCCTCCTTATACCATTCCATCTCCATATCCTCCGCCTCACCAAAGTGGCTACTATAAGCAGCAATAGTGTTCATCCATACATCTTGTAGGATAAAGAGAATATTCTTTCTGATGCCATTATCTCTTGAATAAATGAGATTCAGCCCTTTATCTTATAAAAGCCTTTGCATTGAGTGAATCTTTTGTAGTTTCTGTTTTCTNTNTNTATGGTTTGTGTTGGTTTGCGTCATCATTGGATTGTGTGCATAGTTGATCTTAATACAACGTTGTATGTATAGTTTGTTTGACTTGTACCTTACG…
Gma.5170.1.A1_at	BQ628737	At5g61210	6e-30	Cell Growth & Division			GAAAGGGTAATCACTTGGAGCAAAGAGAGAAGTTGGGGCTGACTTCTGCACCCAAAGGGCAGTCCAAGCTACGGTCCCCACCTCAAGAACCAACAAATGCATTTGAAAAAGTTGAGGTTGAGAAAAATAAGCAAGATGATGCACTATCAGATTTAAGTGATCTGTTGGGAGAGCTTAAAGGCATGGCTGTTGACATGGGATCCGAGATTGAGAGGCATAACAAAGCCCTGAATCATCTCTATGATGATGTGGATGAGTTGAATTTCCGAGTGATAGGTGCTAACCAACGTGGACGTCGTTTGCTCGGAAAANAAGATTGATTGATTTCATCGTTGTGTTTTTCTCTTTGTATCCATCATCTGGTTTAATGAAGACAATCTTTTCATTTAGTTTACACTT…
Gma.5692.1.S1_at	BM522647	At5g48630	5e-30	Cell Growth & Division			TGAGAGAATCAATGCTGCTCTTCAGAAGNTGAGCCTGAGACCCTAGAACTTACTGTAGATGACTCAACGCTGAATATGTGGAATGAAGTTAATGCTATGGTGATTGGTCTGAATGATTTTTCTGGGTCAATGACATGTTTTAGGGTAGAACACTATCTAAATGTATCCAAAAGTAAGGGCACGTAATATTGGGGGTCAATTCAAAGTGTCCTATTAAAGAGCAAAAGGAGGATGAAAAAAGNNNGATTCTCGGTGAGGACCAGATANNNNNNNNCNNNNTNNNNANNANNTTTTGTTTTTATCTATTTATTGTCATAAATCAAAGTGTCTACAANTTTTTTAAAACTTTTTACCATTATTTAGTGTGANGAACAATTTATAATTGTTTTATCGGTCTTA…
Gma.6815.1.S1_at	BQ610426	At5g55310	0	Cell Growth & Division			CCCCTTCGAAGAGTTCAGATGGAAAGAGAAAAAAGAACTTGNGTCCCGAAATGCTAGAGAAAAAGATATCTCAAACCAATGCAAAAATTGAGAAAATGCAACGTGATATGAAGACAAAAGAAGATCTGAAAACTGTGGCATTGGGCACATCCAAGATAAACTACCTTGACCCTAGGATTACAGTTGCCTGGTGCAAGCGGCATGAAGTTCCTATTGAAAAGATTTTCAACAAGTCTCTGCTGGCGAAATTCTGTTGGGCAATGGATGTGGATCCTGACTTCAGATTCTGAGATCTATAGAATGGAGCCATGTTATGATGGGTGGGGAAAAACATTTCTTTTTTACTTATTTCTTTTCTATAAGATTTTTTTTGTTTCGTCAATTTTAGCGGAAATTGAT…
Gma.6820.1.S1_at	AI416867	At1g03860	2e-71	Cell Growth & Division			AAAGGGCTGCTAACTTCAATATTGCCCTTGATGATGTGTCAATTACTAGTCTGACTTTTGGCAAGGAGTTTACTGCTGCAATTGAAGCTAAGCAGGTAGNNGNACAAGAAGCTGAGAGGGCTAAATTTGTTGTGGAAAAAGCTGAGCAAGACAAGAGAAGTGCTGTAATTAGAGCACAGGGAGAAGCAAAAAGTGCCCAACTGATTGGGCAAGCTATTGCCAACAATCCAGCTTTTATCACACTGAGGAAGATAGAAGCCGCAAGGGAGATTGCACATACTATATCAAATGCGGCAAACAAGGTTTACCTGAATTCAGATGATCTATTGTTGAATCTTCAAGAGATGAAATTGGAGCCAGGCAGAAAGTGAGTGTGTTAGCCTGTTTGTTTCTTTTTGG…
Gma.8420.1.S1_at	D50871.1	At2g26760	1e-108	Cell Growth & Division	Cell Cycle		TATCACTTTTTGGTTAGGGATACCAAAGCCTCCACTCCGTCTGACAAAGAGATGGAGAACATGGTGTTTTTCCTTGCTGAACTTGGATTGATGCATTATCCTACTGTAATCTTGTACCGTCCTTCTCTGATTGCTGCTTCTGCTGTGTTTGCGGCTCGATGTACCCTTGGAAGGAGCCCTTTCTGGACAAACACTTTGATGCACTACACAGGCTACTCTGAGGAGCAACTAAGGGATTGCGCCAAAATCATGGCCAACCTTCATGCTGCTGCTGCACCAGGAAGTAAGCTTAGGGCAGTTTACAAGAAATTCTCTAACTCGGATCTTTCTGCTGTTGCTCTTCTTTCTCCAGNNNNGNNNNTNNNAGNANNNNNNNNAGNNAGNNNNNNAGGGGAAGTT…
Gma.8831.1.S1_at	AW119809	At4g28510	1e-126	Cell Growth & Division			GGCAAGGGAAATCGCTCACACAATTTCAAATTCTGCCAACAAGGTTTACTTGAATTCAGATGATCTCTTGCTGAATCTTCAGGAGTTAAANTTGGANNCCAGTGGGAAGAGATAGTTGTGAGGCTGAATTTACTTAATTACTTAAACCTCTTTTTCCCAGTATCATTCATTTTCACCTGCATGTGCGTTTTATNAANTNNNCANCNNTGAGATTCAGCGTCACACAAACTGATAGTCATTATCATTAAATGGAGCACGTGAGATAAGGGAGGTTCAATCCGGGTTTATCCATTTTCAGTGGTTCTGAATTCTGATCTTGAATAATGAATAGTGGCTAACTTTGTCGGATGTCAAGGATTGGATTTGATATTGATTTGTTGAGGCTCAATTATGTTCCAC…
GmaAffx.20155.1.S1_at	CA819552	At3g11820	2e-15	Cell Growth & Division			TTTGTGGTGCTCTTCACTGTGAAGCCGTGGGAAAATAGCANTANTGGCGGCAATGGGGGTGGTCAGCCTGCACCAGCTCAAACACCTCCATCACCTTCACCTCCTGTTAATGCTTAACCTTGGGGGACTATGAGTCTATATTTCACGAAGCATATTGGTTTCATTTATTTTGATTTGAAGATTGAGCTTTTATATTTTGGGATGCAGCACGGGTGATTGGCTTATGATTTGGTAGGAAATCTGTTGGGTTGACCAGCAGTGTCATTTCAATCCATGGAAAGGTTGGATGATTAATCTGAGTTTGTAATCTGAGGGAAGTGAATGGCTGATTGTTCTGTTGAGGTAGGTTCTTGGAGATCATTATTTTGAGCATCATATTCTTTTTCTGTAAGTAGTTNA…
GmaAffx.54397.1.A1_at	CD410704	At1g63160	4e-88	Cell Growth & Division			GTTTTCAAGGTTTGTGACCAGCCACATCCACTGCATGTGAAGAATATGGTGCGTAATGTGATTGAAGGGAATTTTGATGAAGCTTGTTCAGGCCTCAAGCAACTGTATGACTTGGGATATTCCCCCACAGATATCATCACGACACTCTTTCGTATAATAAAAAATTATGATATGGCCGNNTNNCTGANANTNNNNNNNNTGNAGGAAACTGGTTTTGCTCATATGAGAATTTGTGATGGAGTTGGTTCTTATCTTCAGTTGTGTGGTCTATTGGCTAAGCTTTCTCTAGTTCGTGAGACAGCTAAAGCTGTATGAGCTGGTCCTAAGTGCAACTGAGATGTCATTATTTTTAACTTTTCCGATAGTGAAATGTTCTGCTGATGTAGCCTTATATTTTTT…
GmaAffx.72045.1.S1_at	BG406239	At3g52750	8e-74	Cell Growth & Division			AGGCCAGTCAACTCACTCAAGCAGACACAACCTTCGGCACCAATTGGCGGTCTTCCTCTTTCACTGATGGTGGTTTGTTTGAGATACCAGAATTCCNANNGAAGAGAGGAGGTTCACGCTATCCGAGGGCGTAATCTTTTTCATCCTAATTTCTTTGATCCCTTGCATTTCTTCACCCTTGGATATACATAGCATTGGTCTAGTTCTTAGGTCCCTGTCTTGCCCTTTTTCGGATTTTAGTCAGAGTTGTGTATACAGTTTGTTCATGAAAGTTTATTACTTCCCACTGTCCAGACTTATGGGTCTAACCGGAGGTATTGCAGCATGGATGCTTTTCTTGGCATATTTGAATTAGTTTATTAGCTTGTACAGAGATTTCAGTAATGCTGAGAGCTTGTT…
GmaAffx.80018.1.S1_at	BF071726	At3g02510	6e-96	Cell Growth & Division			TTGGGCACCCTGCTGAGACCAAGTCTGAGAACAAGACTGAGAACACTCCCAGCCAGGTCAAGGCTCTTTCCAGTGTTAAAATTGTTCAGGCGGCTATTGNGGGGTGGCACTGTTTGGCCGTTGATGATCAGGGCAGAGCTTATGCTTGGGGTGGAAATGAATACGGGCAGTGTGGCGAAGAACCCGAGCGCAAGGATGGCACTGGTAGACCTTTAAGGAGAGATATAGAGATCCCTCAGCGCTGTGCTCCTAAGCTTGTTGTTCGGCAGGTTGCTGCAGGAGGAACTCACTCAGTGGTACTTACACGAGAAGGGCATGTTTGGACATGGGGTCAGCCATGGCCGCCTGGTGACATAAAA
GmaAffx.84584.1.S1_at	BI699835	At5g45190	5e-09	Cell Growth & Division			GAACTGGTCTAAGCCTGATGGTGAANATCACCATGGNGNNNAGAACCATGAGGAAACTAGAGANGGGCGNNACNTGANCATGAAGGNGCAGTTTCAGAAAGACATGGACGAAGACAATGCTGAAGAAGGGGAGATGATAGACGATGCTTCATCCTCGTTGAACAATCGCAAGAGAAGGATGGGGAGCCCTCCAGGTAGGCAACCAGAGATGAAAAAGCATCTTGATTCCAGTTATCACAATGATCTTGCCGAATAAAGGAACTTGCCGAATAAAGGAACTTGCTGAATAAAGGAACTGGGAAGGGGGAGAGTTGGTTATGTAGGCAGGGAAAACACAAGGAATGGGGAGCAAAATCATTGTTGAGGTGAATATTCTGCTGTCCTTTATTTGTTTATTTT…
GmaAffx.87008.1.S1_at	BE804610	At3g16850	1e-128	Cell Structure			GAATAGTTGATTCGCCTTTCACTCCTATCTGTCTTTNNAACGNGACNTTTTCTNCCAGTTCNGAGTCATCNNNTCCTTCATGGTTTTGTTCTNACNTAATGGGAATCTCCNAGGANGTGTTTCCTGAGCCATGTCCTGATCTGCAGAACACGTATTCAAACTTTTCCTCTTGCTTTTCTTCCCTACATCCGTCGTCTAGTTNTGTCTCAAGCGCATGAGATNGCCATCTCTAAGNATCTAGTCATTNCTTTGATTCAACCTGTACATGAGACACAAAATTCATATTCCATCAGGAACTTCATTACAATTTTCCAATAAAAGGAAATTCTTGATGTAAAGATGTTCTTTCTCTTCAACATTTCAATGAACCTTCCTCTTGTCTGTGCATGAAAAGTCCGT…
GmaAffx.88384.1.S1_at	CA802654	At3g02230	3e-28	Cell Structure			GCAACGACATCAACCGCGTTCTTGGCCCCAAGGCACACTGCATCTCCTTCAAAGACTCTGCTTGTCGCTGTTTCGGATTCTTGTTGTCTAAGAAGAAGTACATCTTCACCATTGATGATGACTGCTTCGTGAGTCTCATTCGCCTTAATTGCTTCATCTTTTTTTTTTTTTAACTTTAATTCTTGGGTCTAACTTTTGAACATGACCTGCTTCGTGTGTCGAATTTTCTCTGGTTTTGGCTTCGGTTTTCTTCTATCTGTGTCTAA
GmaAffx.88705.1.S1_s_at	CK606623	At2g18050	2e-24	Cell Structure	Histone		TGTGCCTTGCTGCACAATCTTGAAGAAAGTTGTGTAGTGTAGGATGGTAGATAGTTTAGT
GmaAffx.88786.1.S1_at	CK606552	At4g34050	1e-108	Cell Structure			GAGGTAGTTGTCCTTGTCCGCATCAACAAAGATGAAGTCATAGCTTCCATGGTTCTTCTCATCTTTAATCATTTCATCAAGAACTGGTAGAGCAGGACCTTCTCTGAATTCAATTTTGTGGTCAACNCCAGCTTTTTTAATTACAGGCAAACCCAATTCATAATTCTCCCTGTTAATGTCCANGGCCAAGATCTTTCCATCTTCAGGAAGAGCGAGAGCGGTGGCAAGAAGTGAATACCCAGTGTAGACACCAATTTCCATGGTGTTCTTGGCNNNGNTGAGCTTAAGGAGCATGTTCAAGAACTGCCCTTCGTCTGCAGAGGTTGTCATGATGTTCCATGGGTGTTTTGCTGTCAACTCTCTCAGTTCTTTCATGGATTCAGGTTCTCTTGGGTAGAC…
GmaAffx.91053.1.S1_at	CF806778	At5g10980	5e-40	Cell Structure	Histone		TCCCGAGTAAGAACGAGGCAACCCAACAAACTAACTTAAACGAGATTAGATGGCAACTGAATGTTGTCCAATACAGTTTCTAAAGTGGCTGCAACATCCCGCAGGTAAAAACTAAAACAGAAGCATTCTAACACATACATATGTCCAAAAATCAATTACAAGCCAATTTTCTTAAAGGAAGAAAACACAGTCACGGACACTCGGCAGTATTTGCCTATATCCCAATTAATGCTACTACCAGCAGAAAACCTACCCTCCCTAACAACCCCATCTATTGAATAAAAAAAGGAATCTGAAAAACAAAAACACCAACCGCAGCCACCAATCATCTTCATCTTTCCAACCACCAACTCAAGCACGCTCACCACGAATCCTTCTTGCCAGCTGAATATCCTTGGG…
GmaAffx.92992.1.S1_x_at	CF808717	At2g44450	3e-51	Cell Structure			GGAACAATCCAAATTACTTATTGATTCTTTTGATTTTATTGGCATAAACTACTATTCCACTTCTTATGCCTCCGATGCACCTCAACTAAAAAGCAATGCCAAAATCAGCTACCTAACAGATTCCCTTGCTAATTTTTCATTTGTGCGTGATGGAAAACCCATTGGTTTAAATGTTGCTTCAAATTGGTTGTACGTTTATCCAAGAGGATTTCGAGACCTTTTGTTATACACTAAAGAGAAATACAACAACCCTTTAATTTATATTACAGAAAATGGTATAAATGAGTATGATGATTCATCATTATCACTTGAGGAATCTCTTCTTGATATTTATAGAGTTGACTATCATTATCGTCATCTATTTTATCTTCGAGAATCAATTAAGAATGGTGTGAATGT…
GmaAffx.93166.1.S1_s_at	CF805719	At3g02230	1e-127	Cell Structure			TTTTCAACACCCTCTATGAACCTTTCCGAGAAGGTGCAGATTTTGTTCGTGGTTACCCTTTCAGTCTCCGGGAAGGTGTACCAACTGCAGTTTCTCATGGTCTTTGGCTCAACATCCCAGACTACGATGCTCCTACCCAGCTTGTGAAGCCTCTTGAGAGGAACACTAGGTATGTGGATGCTGTTTTGACCATACCAAAGGGCACTTTGTTTCCCATGTGTGGAATGAACTTGGCCTTTGATCGTGATCTCATAGGAGCAGCAATGTACTTTGGTCTCAT
GmaAffx.75793.2.S1_at	AI494968	At4g38710	5e-23	Cell Structure			ACAAAGGGCGGTGGTGAGTGCTTCTGCTTCATCATCATCAGAGAATGGCGGCTACTGTGTCTTCTGCTTGGTCAAAGCCCGGCGNGNGGGCCCTAGATTCCGAGGAACACGAAGCCGAGCTCCTTCAACAGAACAACAACAACCCCAACGACAAGCCACTCGCCGACTTCCCCTCCCTTGCCGCCGCCGCCGCCACCAAGCCCAAGAAGAAGAAGGCCCAGACCTACTCCCTCGCCGAATTCACCGCCAAGCCCGACTCCGCCTTCGCCGACCAAGATCCC
GmaAffx.54208.1.S1_at	BE824212	At4g31140	1e-24	Cell Structure			ACTTCATGTGGTGGTTTAGATATTCGTGGTAATATTTCTTATGCATTCAATAGCTACTTCCAAGTGAATGACCAGATTGACAGTGCATGCAAATTCCCTGGCCTTTCTGTTGTCACTGACAAAGATCCTTCAACTGGAGATTGCAAGTTCAAAATCATGATTCAGACAGATTCTGCTGGTCTACATGGGAATGGGAGAATTTGGTCTCTCAGAATAGTACTCTTTGTACTTTTGTTTTTCACTCTTATGT
GmaAffx.59853.1.S1_at	BQ612438	At5g36890	1e-152	Cell Structure			TAACTTGCCGTTACATGAGATGCTAGATGACAAACTGAGAGTTCGCTATTTCAAAGGATATCTTGCGTCAGTTGCTCAGGCTATAAAGGATGGAGCAGATGTAAGGGGATACTTTGCGTGGTCATTACTAGACAACTTTGAATGGGCTCAAGGTTATACAAAACGCTTTGGATTGGTCTATGTAGATTATAAAAATGGGCTCAGCAGGCACCCCAAGTCTTCTGCATATTGGTTTTCACGGTTTCTGAAAGCTGGTGAAAACAAGAAGGGTAAAGAAGAGTAGCTTACTTTCTTCATTATGTGTCTTTCCATACCAGATACAAGGAATAAAATAAAGTAAGCACAGAATTCCACCTTTATCAGTACTTGGAAGCTTTGTATGGGCTATAATGCCATTTC…
GmaAffx.28750.1.S1_at	BI967217	At2g26600	1e-128	Cell Structure			AGAAGCCTGGGCATTCATCTGAGAAGAACTATGGACTGTTCAAGGCTGATGGGAGTATATCATATGACATTGGCTTTCACGGACTTAATGCTGGACATTCATCTCTTTTGTCTCTTAAGAATATCAATACTCAAGGGTTGTCNCNNNCATACATGATGGTATTCTTTTTATCTTCTTTGATACCGCTGATTTTCTGGAGTTAGTGATCCTTATGATATCAGCCTGCTCGGCAAACCAGTTCCTGGCAATGAAATGAGTTTGACTTGGCTCCA
GmaAffx.42428.1.S1_at	BE821424	At5g27950	2e-35	Cell Structure			GATCAATTGCCTCTAAAAGTTCCATCAATTTTTCATATTCCCAATCATTGAGTTATTCAGATNTCCGCATCAAAGCAATACTGCGAAGTTCAAATGGAAAATCTCGGTACGCTGAAGCAGATAGTGTTCCAATTCCAAAGACTGTTCTCACNGAAAAGCCTAAATGCAACAATGATTTGGAACCAAAAGTCACAACTCCTCGAAGCAAGATGGTTACATCATCAGACCAAAACTTTAGAGTTTCATTGGGTCGTCACAGAAGAAGGATGTCTGATTTGATCTAAAGGTTCAAAAGNCATCTTGGTTGCAGATTTTTTAATGTGGTGAAGGGATTGCATGTTTAACTTTTTGCAGTTTATATTTGTCTGTAACAAATAGTAGCGAGTGGTATATGAATAG…
GmaAffx.17518.1.S1_at	AW598055	At3g62110	2e-07	Cell Structure			GGATATTCTGACTTAGTCCAGCCAGAAGCTTGTGAGCCTCTCAAGGAGAGAATATTCCCTGATCATTGTTCAGATTGTTACTATTTGACAAATCAAATTCAGAGTTCNAATAGTCAAANTNNAGCAGGACAAACTTCAGGTGACATAAGAGGTTGAGTGGAGTTGCCCNNNNNNNNNNNNNCATCTGCAGAAAGANACCGAGAAATGATTGNTTTTTGTAACTTGTGTGCAGTAACAAAATAATTGAGTGATTTATCAGAAATAGGAAGTTGGATGATTTCATGTCTTGCTTTTTCTAGCTANATATGGCTTTGGAAANGAAAATTGCAAAGTTNNGTGTTTCTNNTGATTCTAAGGGAAAGANTGNGTTTGGCTNTTGATAGAGGTGAGATATGGCTA…
Gma.9025.1.S1_at	BQ612940	At2g05630	1e-57	Cell Structure			GAAATAATCCGTGACTGGTAACCATCTGAATAGTACTTCCTAAAATTGACCAATGTGAAGAAGTCAGCTTAATTGTAAATTCTCTGGTTTGATGCTTTTATGTAAAGTTTATTATGTCTANTGNAACTTATTTGAAAATTGTCGTGTTTCTATCAGTTCTAAATTGCATAAGTTTAAGGGTATGTTCTTTGTTCACACCGTTGATCCCTGACCTGCATGTCCGATTGGTGTCATACAATTTGTAGTTTACA
Gma.9866.1.S1_at	AI443349	At1g76160	4e-83	Cell Structure			TCAGTCATGGGTGCCGACTTTCGAGCCTTCGTCGAGGTCGTGTTTCAGAACCATGAAAACATCATCCAGAGCTGGCACATTGATGGGTACTCATTTTGGGTTGTAGGAATGGACGGTGGTGTGTGGACGCCTAATAGTCGTAACCAATACAACCTCAGAGATGCAGTATCGAGGAGCACAACACAGGTATATCCTAAGTCATGGACCGCAATTTACATGGCATTAGATAATGTGGGTATGTGGAACATGAGGAGTGAATTTTGGGCACGCCAATACCTTGGACAACAATTCTATTTGAGAGTGTATTCACCAGTTGGATCCATTAGGGATGAATATCCAATTCCNAAGAATGCTCTTCTTTGTGGCAAAGCTGCAGGCAGGACAACCAGGTGATCTCTA…
Gma.7439.1.S1_at	BU547716	At3g16630	2e-40	Cell Structure			GCAGAGCACCGGGAATTATAACAATATCACCACTGGATCCAGGNTTAATGAAACAGAATCCTCTCCTGATGGGAATGTCAGTGCAGTACTTGAGGAGGANGAAGCNCTNATNGCNGCTCATAGGAAAGAAATTGAAGATACAATGGAGATTGTTCGTGAAGAAATGAAACTCTTGGCAGANGTGGANCAACCGGGAAGCCTTATTGACAACTATGTAACCAAATTGANCTTTGTGCTNTCTCGCAAAGCAGCNAGTCTCGTGGGTCTTCAAGCTCGTCTTGCAAGATTCCAACATCGNCTAAAAGAGCAAGAAATTCTAAGTAGAAAAAGAGTTCCCCGTCAATAAGNGACTCGGTTTCTCTTATNNNNNNNNNNCTGTATTCTCGTGTTTNTTAGCAA…
Gma.775.1.S1_s_at	CD402282	At3g54560	6e-52	Cell Structure	Histone		TGGCCTTCTGAATTCATGTTGCCCTTTACTGAAAACTAAGTTTGTGGTTATTGTGAATTGATCACAGCAGTAGGCTAGTACGAGGATTTGTTTTAACAGTTTTAGAACTCAGGTGGTAGTGTGTAAATGGCTTGCTTGCTAGACAATGCTTTCTTTAACTGTTTTAGTTGGTCTGTTTTTAGAGCTTTAACCATGTTGGATTGCTA
Gma.5949.1.A1_at	CD412339	At5g65360	5e-65	Cell Structure	Histone		CTTGGTAGGGTTGTTTGAGGACACTAATCTCTGTGCCATTCACGCCAAGCGCGTCACCATCATGCCGAAGGATATTCAGCTTGCGCGGAGAATTAGAGGCGAGAGGGCTTGAGGATTTTTTAATGATTTGTCACTGCTAGGATACGTTAAAACTGGATCTGGTTTATGTAGTTTGTGGTTTTGGTGTATTTATTCGACCGTAAGGGTTGTGGTTGTTAGTATGAAGATGNAGAGTTAACATTATCTGGCTAATTAGTTGGTTAATGTTTACTTTGAATTTGCTG
Gma.6062.2.S1_a_at	CD395597	At4g14360	1e-135	Cell Structure			GACTGTGTTTTCTGATATTATTAAGAAAGAATGCAGTCCAGAGGATTTATTAATTGAGATGGATAGAATCCTAAGGCCAAAGGGTTTCATCATTGTCCATGATAAGCGTTCAGTGGTGGAGTATATAAAGAAATACTTGCCAGCATTACACTGGGAGGCTGTGACCATATATGATGTAGATGATGATGATACAGTGATTATAATTCAAAAGAAAATGTGGCTCACAAGTCAAAGCATCAAGGTCTCTGAATAGTGTCATANTATTCACTTGTATAAGTTACCAGTGCTACTAGGTGTATAAGTGTATTATGTAGCTCTATTCCTAAGGCCTAAGCTTTCAGTGTAGCTCTCTTCACTATAGACG
Gma.6199.1.S1_at	BQ612015	At5g66920	0	Cell Structure			TTGACGGTTATGACTTTTGGGTCGTGGGTTATGGTTTTGGTCAGTGGACACCAGCCAAAAGAAGAACCTATAATCTAGTTGATGCTCTGACCAGGCACACTACACAGGTATACCCAAATGCTTGGACTACAATATTGGTGTCCTTGGACAATCAAGGTATGTGGAATCTGAGGTCTGCAATATGGGAAAGGCAGTATCTTGGGCAACAATTATATCTCAGGGTTTGGACTTCTGAGCGCAGCCTTGCTAATGAATATGATATTCCCAACAATGCATTGCTTTGTGGCAAAGCTGTTGGACATAACAACCCCTAGTATCACTATCAACACCAACTAATCATATTGTGCCGTTTTCTAGTCATGAGGGTTTGACTAAAATTGGAAGAGTTGGAGAGAATTT…
Gma.5449.1.S1_at	BG511648	At2g30620	1e-16	Cell Structure	Histone		CAGCGAAGAAAGTAGCGCCTGCTAAGAAAGCGCCAGTGAAGAGTGTGAAACCAAAGAGTGTAAAGTCTCCAGCGAAAAAGGCTACGGCTAAGAGAGGGGGTAGGAAGTGAGAATGTGGTGGGTAGAGTGGTTTTAGGGTTAGTTTTGTGAAGTTCTTTGTCCTCTTGGTGGTGTAGTTGGGGTTACAGATGATCCTATAATATATGAAATCTGATTTTATGAAACCTTTGTTTTTTTTTTCTTTTATTTAGTTTGAATTTTTTCTTTGGTTCGACCTTAGGGAGTAGATTAAAAAAAGCTTCTAGCTCTGCTTTTCAGCTAAATGAGTTAATCATAAAATGTATCTTATAGAGTATGAGGTTTCTCTGCGTTATAGTACCTTTGATGGATCAATGTAGT…
Gma.5137.1.S1_at	AW734306	At1g23220	3e-39	Cell Structure			TCAGAGCCGTGCCTTTCGTTGTGCACGTGATCTCCTGGATTCTATGCCANCAAAGAAGCTTGATAGTAAACGCCTGGCCCTCACACTTAAGAAGGAATTTGATTCTTCTTATGGTCCAGCTTGGCACTGCATTGTGGGTACTAGTTTTGGCTCCTATGTTACTCATTCCCTTGGTGGTTTCGTGTATTTTTCCATTGACAAGGTTTATGTCCTTCTCTTCAAGACAGCTGTTGAACCATTAGACCATTCATAGCTTCCACAATTGAGTTATATGCACATCTCCTTGAGAACTTAAAATAATTTAATATTTCAAACCAACTGATGTGTGAAATTACAAATTGTAANATTTAAAGACATTTGTACTCTGAAGTATTTGATGCACTTCAGTTTCGAGTGGGA…
Gma.3917.1.S1_at	BE658782	At4g19420	1e-158	Cell Structure			GAGAAGTGACTCTCCAGAGCTGAAAAAGACAACAATTGCAAAGGCTGTAGCAGATTGGTTTTATGAAAGAAGGCCTTTCCATCAGATAGATTGCCCTTACCCTTGCAACCCCACTTGTCACAACCGTGTTTTCGATCCACAAGACGACCATCCAGGAGTATAGAAATATTCATTTCATCAAAATCTAGCACACATTTATTTCTATCATTTTTATAAAAACCACACACACTTATTAGTTATTGGTTAGCATGGGATTGAATAAGAAAATATGATCTCCAATTTTATTATTAGGCCACCAAAATTACAAGGAAATGCCGCCACTGCACTAAACTTAATTGTGTGCCGGGCGCACCTCCATCATTGTTTAGTA
Gma.4452.1.A1_s_at	AW310094	At2g32240	1e-05	Cell Structure			GTTGGAAGTAAAATCCAGGGACATTGGTTCAAGCCTCTCGATTCCATCAAAAAGAAAGAGCAAGAAAAAGTCAGAAGTAACAAGTGGTCAGACATCATCTTCATCCGAGACTCATGTTCAAACTGGCCATGATTCTCCTGTCATAAATTTCAAGTTCATCTTGGGNGTAGCTCTTGTGTCCATTGTCTTTGGCATAATTCTTGGAAAGCGTTACTAGTATCAGCAGTNTATGTCTTTTGATTTTGTTATTCTTCATGTTTTTTCATTTTTTATGTTTTTTTTTTCTCTCTTCTTTCCCGTTGATTAAGATTAAATACAGATTGAAAGCTTTCTTTGCATGCTTTCAAACTCAAGTCTTCAGCTTGGTCAGGGAACTTGTTTTAAT
Gma.4491.1.S1_at	BI967493	At2g20520	1e-56	Cell Structure			GGTGCTGTTGCCGTTGGAGCTCTTTGGAACCACCAAGACCACTCATTCTTCTGAGGCTCCTTCTCCTAAGGGTTCTAAGAGTACTCCTGAGATTCCCAGCGTGGGTAAGGCTGGTGGCGCTCCTTCTCCTCATGGTGATAAGAAGGATACTAATGCTGCCAATGGGAGGAATGTGGCTTTTGGACTTGTCGTTGGACTTGCCTTGATTTGCATAGAAGCTCTCCATTGATCATCAGATAACTTGTGTCTCGTGTTTTTCATCTTTTTCTTTTACTCTCCATCACTTCATTTGT
Gma.3674.1.S1_at	BI784836	At3g12360	6e-35	Cell Structure			GAATTCTCCAATTCCGAGGTTGATCCGATTTATGCGCTTTGAGTTTGAACTTGCAACCTTCAGGGGATCATGAAGAACAAATTGTTGTGAAAAAGATGACAGGTTTTTAGGTTTGCTACTTGCTCCATGTTACCACTTTAAGAGTTCTTCACTGTACAGGAAATTGTTCTCTTCGGCTTAGCTGCTGCTTTTCTAGGATCTTATATACAAATTGGAATGAAGCATGCATCATCATTGGAATGAAGCATGCATCATCCCGGTCTGTGATTTTTAAGAACAAAATCCAACATTGCTTTAATTCTCAATTATGTATTGATGTATTAGCAAAATGTCTCCCTTCCCTGTTCGTTACTGTTTTTTTTCTATCACTAGAATTGTCTTCGGGGCCTAATCTACACN…
Gma.3316.1.A1_s_at	CD409980	At3g54560	2e-46	Cell Structure	Histone		GGCGACTGCTGCTGTGTACTTGGCCTCCATTCTGGAATATCTGACTGCTGAGGTGCTGGAGCTGGCNGGGAATGCTAGCAAAGATCTNAAGGTGAAGAGGATCACACCAAGGCACTTGCAACTNGCTATCAGGGGAGANGAAGANCTTGANACCCTCATCAAAGGGACCATTGCTGGNGGTGGTGTNATCCCTCACATTCACAAGTCNTTGATCAACAAAGCNGCCAAAGAATGAAAATCAAANGCCTCTTTGNTTCTCCTATTATGTGTTNCTTTATGTTTATGTAGNNNTAGTNAGTGTAGTAGGCCTTNNNTACTGTTTANGAACAGATGTTNATGTTATTGTGTAAATGGTCATTCTATTGGCTTTTAACTTGCCTGTTGTGATA
Gma.2464.2.S1_at	BM092071	At3g02230	3e-58	Cell Structure			GGCAAAGCATGAATCAGTTTTGGTTAACTGCATAACAACAGCCACAGAACTTGAAGTGGAACTATTTATATACTGTATTTTTTNNCCCTTAGTATTTATTTTCAACTTAACTTTTATTCTTGGCTTGAATTTTGCAGCATTGTTAGCTGTAATTCTATTTAGTAACTTAATGATTTGAGCTTAGAAAGAACAAGTACACCCGTAGGGCGTTACTTTCTTTTTATTACTGTTTAATGGGTAGAGTTCACATGGCAGCATTTCGTTACATGTGAAATAATAGAACGGATAGTGGTGTATGTCTTATTTATTACCGAGTAATCGAGTATAGATCCAT
Gma.17982.1.S1_at	AW185083	At5g07720	1e-108	Cell Structure			CTCAGTAGCATGGAGAGGGCTTTCAATTTTGCTGATAATCAGGTGCTCAAGCTCTATGGGTTCAGGCACCGTGGTCTCTTGAGTCCTAAGATCAAGAGGATCAGAAATGAGACAGTTAGTCCTTTGGAGTTTGTAGACCAGTTTGATATTCGAAGACATTCTACAGAAAACACGNNNANCAAAGAGCTAGTGAGAAAGTTGTTGTTCAATGGGTGGTATTATAGAGAGTAATTATTTAGAAGTGGAGTTTCATTTGGGGACAGTTCACATGTAACTTTTGCTTCTTCTGTCGTCTTGGTACTTCTGTGAGAATTTTAGGATAGAATTCTTTCGTAAGTTCTTCTTTCTTCCAGATTTGAGCAATCAGCAAACAAATTTTATTTACTCATCTACTGTATA…
Gma.2190.1.S1_at	CD390492	At3g02230	0	Cell Structure			TCTTTCAAAAGAGTGCACGTCTGTCCAAAAATGTTACATTGAACTCTCCAAGCAAGTCAAGGAGAAGCTTGGGGCTGTTGATCCCTACTTCATCAAGCTAGCAGATGCCATGGTTACTTGGATTGAAGCTTGGGATGAGCTTAACAACAACACATCTGAAGAAGTTCCTTCAAAGCCAACCAATGGTGCTGCTG
Gma.2190.1.S1_a_at	CD390492	At3g02230	0	Cell Structure			GCTTGGGAGTGAAGACTGGCCTTCCATACATCTGGCACAGCAAAGCAAGCAACCCTTTTGTCAATCTCAAAAAGGAGTACAAGGGCATCTTCTGGCAAGAAGAAATCATTCCATTCTTCCAAAGTGCCACTCTTTCAAAAGAGTGCACGTCTGTCCAAAAATGTTACATTGAACTCTCCAAGCAAGTCAAGGAGAAGCTTGGGGCTGTTGATCCCTACT
Gma.2190.2.S1_x_at	BG550828	At3g02230	0	Cell Structure			TTGGGAGTGAAGACTGGCCTTCCATACATCTGGCACAGCAAAGCAAGCAATCCTTTTGTGAATCTCAAAAAGGAGTACAAGGGCATTTTCTGGCAAGAAGAGATCATTCCATTCTTCCAAAGTGCCACCATTCCAAAAGAATGCACTTCTGTCCAAAAATGCTACATTGAACTCTCCAAGCAAGTCAAAGAGAAGCTTGGGGCTGTTGATCCCTACTTCACCAAGCTTGCAGATGCCATGGTGACTTGGATTGAAGCTTGGGATGAGCTTAACAGCACCACATCCGAAGAAGCTTCTT
Gma.2242.1.S1_at	BQ627543	At5g12250	0	Cell Structure			AACGACCTTGTTTCAGAGTACCAGCAGTACCAGGATGCCACTGCCGAGGATGATGGGGAGTATGAGGACGAGGAGGACGATGATGTTGAAGCAGACCACATGTGAAGAGACTGAATGTGAAAGATGCCTGTGTCTTACTTATGCTATGTGATGCGTAAGTGTGTTTGCTCTGCTCTCCAACGTGAAGAAGATTGTAATTACTAATAGTGTATGTACGGTTTGCGGGATAAAACTTTGATGAGCTTGGTGTGGAGAATGGAAAAAATAGGGGGTTAGTGGGAGTGGAGTTTGGGAACAATGTTATGCGGCACCTATCTGTTTGTTCTTATATTGGCTTGCTTTTATGTTGTTATATTGAGTCATGTTTCCGTAATATTTGTTGTTCTTATGCNNGACTTT…
Gma.12193.2.S1_a_at	CA801551	At1g68060	1e-106	Cell Structure			CCCCAATTGATTATAAGATTGTAACTGGCATTCCGATGTCCATTGTTTATGTTATTGGCCGTGGATTGATGGTGAAAAGAGAGTTTAAGGAATCGGGATGCGTCTGACATAGACTCTTGTATTTCCTGCTTAGAGAGAGATCGGCTAAGAAGCCAGGCAAAGGAAGAAAATTAACTTGCATTCCGATGTCCATTGTTTATGTTATTGGCCGTGGATTGATGGTGAGAAGAGAGTTTAAGGAATCGGTATGCGTCTGACATAGACTCTTGTATTTCCTGCTTAGAGAGAGATCGGCT
Gma.10707.1.S1_at	BI967315	At5g02560	1e-40	Cell Structure	Histone		ATCTCCTAAGAAGGCCTAGATTATCCTTTTTTTTTTTTTTTTTNNAAATNTAGTGTTGTATATCGGTGCTTAGATGCTTTTGGTGTAACAGGAAATTTGATGTGTTTCTTAAACATTGTAATTCTTGTCCC
Gma.10723.1.S1_at	BI700359	At5g48160	0	Cell Structure			CAGAGGCTGATATGTTCCAATTGAAGGCTGATGAGGCTAAACGAGAGGCCGAGAGGCTTCAAATGATTGCTCTTGCCAAGCAAGATAAATCAGAGGAAGAATTTACTAGCAACTACTTGAAACAACGATTAAACGAGGCTGAGGCCGAGAAGCAGTACCTTTATGAAAAGATCAAATTGCAGGAGAGTTCTCGCGCTTCGCAGGGCAGTAGTGGTGGTGACCCCTCTCAGATGCTGATGTATTCCAAAATTCACGATCTGCTTTACAGTGTTCCTTCCAAAGCAGACAGTCAGGGTAATGAGCGCCACCCTTTTCGGACAAATCCCTGAGAGTCCATTGTGTTTGTAATGCCAANTTATGTTAGCTGTTGTAGCTAAGTCACCTTTGA
Gma.10738.2.S1_s_at	BQ629434	At5g09810	1e-104	Cell Structure			TGTTTTTATGGGTCTGTGTCGTGTCATGTTANACAATATTGCCATGGATAAAGAGGTGAGGAAGCATCATTAAAGGAGAGGGTCTATTCTTAGCTTGATGCATCATATTTTGTGTGGGGGCCAGACAGTTAGAAAGGCATTTCTTGCGTTTGGCTATCCGTGGTTCATCTATATCTTCTTAGTAGGTTGTTTGTAGCAAGGGAGTGATTGTGATGATCTCTTTTTCCTCCATTTTCTTTTTGTATTTTTAAAGTTTANATTTGAAGGATTTTTNCCCCTTGGAACATTGAATCATTGAT
Gma.10479.1.S1_at	CD414847	At1g52740	3e-60	Cell Structure	Histone		AACAAATCTTCGAAGGAATGAGGAAGGTTTATAACTTATAAGTTATTTGAATCNAAGATGAAAATCNCTGTAAATTTAATTATATCTTTTACCTGTGGATAATTTGCCCCTTGCATTATTAGTTTGGTTGAACTAGAACCATCCTTCAAAAGAAATCTGAAAATTTCTGATTTCTTCANNNNAANNNNNNNAANNNANNNNNNNANNNNNNNNNNANNNNANTGNANNTTAGATGATACTGCCTGTCTGTCTAGTCTTTATTGTGGAAG
Gma.10779.1.S1_a_at	AW309422	At5g66920	0	Cell Structure			GGTTATGATTTTTGGGTCATTGGTCATGGTTTCGGCCAGTGGACAGATGCCAGCAGGNAAAACATATAATCTAGTGGATGCCCTGACTAGACACACTACACAGGTGTATCCAAAATCCTGGACTACTATATTGGTGTCTTTGGATAACCAAGGCATGTGGAACTTGAGG
Gma.1458.1.S1_at	BI970708	At1g76160	0	Cell Structure			ATTCAGAGCTATCATCTCGATGGCTACTCTTTCTTNGTGGTTGGTATGGATGGAGGACAGTGGACACCTGCTAGCAGGAACACGTACAATCTTCGAGANGCAGTTTCGCGGTNCACAACTCAGGTATATCCCAAGTCATGGACTGCTATATATATTGCGCTTGACAACGTGGGAATGTGGAACTTGAGGTCTGAATTTTGGGCACGGCAATACCTTGGCCAACAGTTTTACATGCGCGTTTATACAACATCGACCTCAATCAGAGATGAATATCCTGTTCCGAAGAATGCACTACTTTGTGGTAGGGCAAGTGGGAGACACACTCGACCCCTTTGAGCTAGCAAGCAAGCGCCTTCGAGTATGAAAACTAAAGCAGTTAACTTATCTGCTTCTGATTTT…
Gma.16073.1.S1_at	CD395530	At1g54690	4e-43	Cell Structure	Histone		GGTTCCCCTGTTTACCTATCTGCGGTTCTCGAATACCTTGCCGCTGAGGTTTTGGAGCTTGCCGGCAACGCTGCGAGGGACAACAAGAAGACGAGGATCGTTCCNAGGCACATTCAACTTGCGGTGAGGAACGANGAGGAGTTGAGCAAGCTGATGGGGTCTGTGACCATTGCCAATGGTGGTGTTCTGCCTAACATTCACCAGAATTTGTTGCCCAAGAAGGCCGCTGGCAAGGGAAAGCCCGAGATTGGATCTGCCAGTCAGGAGTTTTAGATTCTTAGGGTTTCATCTTGTTAGTATTTAGAGTGCNAAATTGAAAGAAAATGGAACTAGTTTTGGTATGTAGTTGGCCGCGTAGTACAGTGAGACTAGGATTGACATTGAATGATGTATAGTCAT…
Gma.16291.1.S1_at	AW350377	At1g04430	0	Cell Structure			ATGGACTGTCCTCTCTGACATAGAACAGAAAGGTTGCAGTCCAGAGGATCTATTAATTGAGATGGATCGCATGCTTCGACCTACTGGTTTCGTGATCATCCGAGATAAACAGCCAGTGATTGATTTTATAAAGAAGTACCTAAGTGCTTTGCACTGGGAAGCAATTGATTCCAGTTCTGACTCTGTCCAAGATGGTGACGAAGTTGTTTTTATCATCCAGAAGAAAATGTGGCTGACTAGTGAAAGCTTTAGGGACACAGAATAGGATAACCATTGCATTTTCATTTTCTTATAAATTATTATCTGCTGCTTCAAGGGATCGAAGCACGTCCTAAGGTGTGAAGCAGTAAAGTAAAACAACTTCATTTTGTAGCATTACATGTTTTCTTTTCATCTAAT…
Gma.16487.1.S1_at	BU091077	At1g18650	2e-32	Cell Structure			GTCACGGTGGCATTAGATTTGTTCACAGCAGTANNTNNTTCTNGATCGCGATCGCCCTCATCTCTGCCTTCATGATGCTCTGCTGGGGTTGAGAATGAAAATGGCTTGACCTGGGTATATGGTGCAAAATGCCTTATTTCACTGTATTAATGTGAATGCTATTTTTCTAGGTGTTGAACTTGGGACGTTAGTTTTTGGGGTTCTTATATAATATTTTTCTCCNNNNNNNANNANNNANNNNNNNNNNNANNAANTAATTGAATATGGTAACAACTTGGCTCCACTTGTTCTTAATCTTAANCTCTGTACGAAGAAGTACATAACGTTGTCAATGAGATGGAAGGGTGGACCTAGTGACACCAATGCTATGTAATTTTTAA
Gma.16720.2.A1_at	CF921114	At3g09270	1e-22	Disease & Defense			GTCAAGAGTTTATCAATCACCCTGTGATCAAGGAGGGCCTGCCTCCTAGAGATGAATTGTTTGCTTTCTTCCAAGCTTCTGCTAAAAAGTAGAGCCGTTTTAGAGGTAGGATTCCTAATAAGTTAGCATGATTTTGTTGGGAAATAATGATAATCTTGTTGTGAGTAAAAGATTGTTCTGTTTTAAATTTAATTGACTGTGGTATTGGTTGAGGGTATTGGCTATTTTAATTTTAACTATAAAAAACTGGTGTTCTGTGTTGTTGCCTGATTTCTCAACNAAATTGAACCAAGCTAAGAAGTTGCCCGAATGGGTGTGCANTATAGGATTTTGGTGCAAGAGGAATGAGTGTTGTGCTTAAACCTTTCTTCATTATTAATGTTCCTATCTCCCCCATCT…
Gma.17271.1.A1_at	AW310765	At2g38390	0.0002	Disease & Defense			GTCAACTAGTTGGATTGCAAGGTCTGGATTACAATAATGGCATATACAGTGGAAAGAATAAGAAACTGTATTGTTTTATAAGGTTAGTCATGTCAGTTTTTATTTTTGCTATAAAAAAGTTTAAGTGGGTTGGATTCGGAAACTTATCAAGACTCAATGAGTTTAAGTGAGTTGGATTCCGAAAAAGTTTAAGCCGTTGGGTTGAGATGCTGAGTTTCTATGTTAAGATTCAATTGTATTTTTATGTTGTATGTGTTGGTTTCAATCCAAAAGGAATTACTCTTTTCAAGTACTAAGCAACTTCATATGTATCGTGAATTGAACTCACATGGTTATTACATCGTTAACTTCTAAGCCCAATGTTATGCATGCAA
Gma.15487.1.S1_at	D63781.1	At4g02340	1e-115	Disease & Defense			ACATGGTATACAACTCGCTGAACTTGAAGGAGTATATCCACGGCGGAGGGTTCAAGCAAGATGTGCCAAATTTAGAACAAGTGATTGTGCAGAAAGGAGTGGCTCACTTCAATAATCAAGAAGCAGCAGAGGAAATCGATAATTACATATACGATTTTATCAACAAGTTCTGATCTTGTCCAAAAACGAATTCAACCAGATATAAAGTCGCAGCTGAAGTGAAAGGGTGTTATAATTGCGCTTTTGTTTTGATATTTAAGGTATCGAGATCTTTTTTATGGGCAGGATTCATCAACTGCAGAAAACCTCCATACCATCAACCTTCCTATGCTTGTTTGTATTAA
Gma.13217.1.S1_at	CD391191	At4g28240	3e-12	Disease & Defense			CAACGGTGGCGGTAGCGCAAGGCCACACCGATCCCGGCCACAAGTGCAAGACGGCGCTCAACTCCATCCACCACAACCGGAGCCGCCTCTTCTCCGGCGGAGCCCTGTCTGATCTCCGGCCGCTGTCCGGCGTCGTTGGACCTGACGTCTCTGGCGCGGCAGCGGGGAGCTCCGACGCGAAGAATAGGGTGAGCCAAGCCGATGACTCTCTGAGGAAAGTGATGTACTTTAGTTGCTGGGGTCAGGGCTGAACCACACGTGATGAACGGTGGAGATTAAAGTAGTCGCCGGAGAAAGTGAACCGGGTCTGTTTTCGGGTCGGGTTCGGATCTGAGTTGACCTGGCCGAGTCTGATCGGATGACTCGGTTGGAGAAAAAAACTTGGAATGTTCTGATCTT…
Gma.4362.1.S1_at	CD405619	At3g11630	1e-107	Disease & Defense			AGTTGACAGTGTGTTCTCGCACCTTGCATGGATCCAAACAGATAGAAAGTCAGGTGGCCTTGGTGACTTGAANTATCCTTTGATTTCTGATGTCACCAAATCCATATCGAAATCTTATGGTGTTCTCATTCCTGATCAGGGAATTGCATTGAGAGGNTTGTTCATTATTGACAAGGAAGGGGTTATTCAGCATTCTACCATTAACAACTTGGCAATTGGTAGAAGTGTTGACGAGACAAAGAGAACTCTCCAGGCCTTACAGTA
Gma.4265.1.S1_at	CD407325	At1g20850	1e-147	Disease & Defense			TATTGTAGAAAACGGTGGACTCCACAAAGAGGAAGATTATCCTTACATTATGGAGGAAGGTACTTGCGAGATGACTAAGGAAGAAACCGAAGTTGTNACCATTAGCGGGTACCATGATGTGCCACAAAACAATGAACAGAGCCTATTGAAGGCACTTGCAAACCAACCCCTCAGTGTGGCCATAGAGGCTTCAGGCAGAGATTTCCAATTTTACAGTGGGGGTGTTTTCGACGGGCATTGCGGAAGTGACTTAGATCATGGTGTGGCAGCTGTTGGATACGGAACTGCGAAAGGTGTGGATTATATCATAGTGAAAAATTCATGGGGATCTAAGTGGGGAGAGAAAGGATACATAAGAATGAGGAGGAACATTGGAAAACCCGAGGGAATCTGCGGTAT…
Gma.4312.3.S1_at	BF424240	At2g31570	5e-43	Disease & Defense			GCAACACCGCGATATGAACGATGCAAAATAGTTTCAGATACGTCGCGTTGATTGATTGATATGAAGTGGTTGACTTTCTGGAACTGCATATCTATCCTCGTGTTGTCTTTTGCTTTCTTC
Gma.4928.1.S1_a_at	AF002259.1	At1g51680	0	Disease & Defense			GCTGCTGTTGTTCCAATGAAGGATGAAGCCGCGGGAGAGGTACCTGTTGCATTTGTGGTCATATCAAATGGTTATACCGACACAACCNAGGATGAAATTAAGCAGTTTATCTCCAAACAGGTGGTGTTTTACAAAAGAATAAACCGAGTATTCTTCATTGATGCAATTCCCAAGTCACCGTCAGGCAAAATCTTGCGCAAGGATCTAAGAGCA
Gma.5312.2.S1_a_at	AW156630	At4g38400	3e-99	Disease & Defense			GATGGGACATGATTCTTTGCTGAAAAATAACTCACATATACGCATAGATAGTAGGCATCAATTTTATTAATACTATACTATAGGCTCACAATGCAACTTATAATAATACTAAGGAATCATGGACTAGCTTAATAAATTTGAAAAGCATTCTTATTTGTAAACCACTCTCCA
Gma.5629.2.S1_a_at	BG042866	At5g64120	7e-14	Disease & Defense			GGACGCAGAGATGGACGCATATCACAGGCTTCCGACGTGAGTAACTTGCCTGCTCCTTTTGACTCTGTTGATGTTCAGAAACAAAAGTTCACAGCAAAGGNCCTCAACACTCAAGACCTCGTCACCCTTGTTGGT
Gma.6384.1.S1_at	BI968043	At2g28190	3e-69	Disease & Defense			TTGACACATGGTGCTCCTGAGGATGAAGTCCGTCATGCGGGTGACCTGGGAAACATAGTTGCTAATGCAGAGGGGGTTGCAGAGGCTACAATTGTGGATAATCAGATACCACTCTCTGGCCCTAATTCAGTAGTTGGAAGAGCCTTGGTGGTCCATGAGCTTGAGGATGACCTTGGAAAGGGTGGGCATGAACTCAGTTTGACAACTGGAAATGCTGGTGGAAGATTAGCGTGTGGTGTGGTTGGTTTGACTCCAGCATAAATAGTGAAGCAAATGTTTTTGTAGCAGTCGTGTTATTTTATCTGATGTTATGTCTTCTGTGANNGCATGATGACTCACGTTCTTACTTTCTTCAGTTACCAATGCAANCTGTAAAGCANAATGTCCTTCTAANGATNA…
Gma.6811.3.S1_at	AW459445	At5g58030	9e-98	Disease & Defense			ACGACCACGGACAACAATTTTGATAAAATTTGCTGAAGAGGTGTTACGAAGAGAAGCAAGATTAGGCTGATGCTTATACCAAGAATTTTCAATTAAAAATATTTTAATGCTGTACACCAATATAGAAAGATNTGGAACTTGCACCTATGGATNTGAAAAAGTAATTTAGGATTTTCACCAGCCTACCCTATTGATTTGTCAATTGAACTCATGCTTTTCATTCTAATGTATGTTCTGCTTTGGAGTC
Gma.6472.1.S1_at	BM091717	At5g26990	0.0002	Disease & Defense			GAACACTCTATTTGCTTTCTCTTGATCTTTTTTTTTTCGTATTATTTTCTCATATGTTTCTATAAATTGTCACCTTCCCAATCAATCTAGTACTCTGTTGCAAAACAATGCTTGCTAAGGGCATAATATGCTATCAAGTAGCGTGGGTTTCATTGTCTTCCTAGCATCTCCTAGTTTCTAATGTGTTTCTACTATTTTCTGTAGAAATGTGGAGACATCAACCTTGTCAGTTAAGGATAAGGAGGAGAAGGAAAAAAGATGCGAGTTTGTTCAAGGGCTGTTGCTGTCCACCATACTTGATGACAATTTATAAAGGAAATTCATGGAGGTGGCTGCTTCAGTAGTGGGCGAATTCATATGCGGTACCTGCTATGTATGGTTTGCCTGATGAAATTGTCT…
Gma.6640.1.S1_at	BQ628278	At5g66390	2e-62	Disease & Defense			GGGTGACCAGAATCTGTTCTTCCTAGACTATGCCACCCCATATAAATTTGACAACAGCTACTTCAAGAACCTGTTGGCCTACAAGGGTCTCTTGAGTTCAGACCAAGTCCTCTTCACAATGAACCAAGAATCTGCTGAACTAGTGAAGTTGTATGCTGAAAGAAACGACATTTTCTTTGAACATTTCGCCAAGTCCATGATCAAGATGGGAAACATATCTCCTCTGACGAATTCAAGGGGAGAGATCAGAGAGAACTGCAGGAGGATTAACGCTTGAAGAAGCAACAATCATTGCCATATTAATATATCATACACCAAGTCATGTGACCACATTTTATTTATGTTTCTTTTGTTTGTGCCCAAAATAATAAAAGCTGAGTTCATCATGAAGCCATTGCC…
Gma.7257.2.S1_at	BG155489	At4g02340	1e-125	Disease & Defense			TGGTGGTTCACCTGACCTTCGTATTGATCTACCTTCGTGGCTGACCGAAGAAGATGTCAATTATTATGCCAGCAAAT
Gma.9839.1.S1_at	CA935357	At2g28790	4e-52	Disease & Defense			CACGGACCCGTGGTGGCTTGCAAGAGCGGGTGCGAGGCTTTTCACACGGACGAACTCTGTTGCAGGAANCACTTCAACAACCCTAACACGTGCAAGGGATCTATCTACTCCTCCTTCTTCAAGCACGCGTGCCCTGCCACCTTTACATTTGCTCATGACACCCCCTCCCTCATGCACCAGTGTTCCTCCCCGCGTGAGCTTAAGGTTATCTTTTGTCATTAATATTAGGGACCAACTACTAAGCTTTCTTGTGTTAAGAAGCCGTTTGGGTCATTGTTAAGTGACTCGACTCTTGTCTTTTCTAATAAGATTCGAACAAAACAGAAATGTAGTAGTCGTGTGTCTTTGTAATTTC
Gma.957.1.S1_at	CD396846	At1g22900	2e-34	Disease & Defense			AGGACCTTGGGATGTTCATGCTCACCAATTTCGCTTTCACCGAAGGAGCTTATGCTGGAAGCACGTTGAGCATGCTTGGGAGGAATCCCATATCGGAGCAGAATAGGGAGTTGCCCATTGTTGGTGGCACTGGCGTGTTTAGATTTGCCACTGGCTATGCCATTGCTAATAGCGTTAATTCCGTTTCTACCCCTCAACATTTTGTTGTCGAGTACAATGTTACAGTGTGGCATGGCTAGTGTGTTTTTTTTTTATCTATAAAAATAAAATATGATACCAGAGAATTTATAATTCTGTTCAAATATCCGAACTATATCCCTTTGTAGCCGTTTGTAGTGAGACCATGGGAGTATGTATGCCTTGTGGCACCTAGAGTTAGAAGTAGCAAGTGATATGGTC…
Gma.9638.1.A1_at	CA936403	At5g25610	2e-15	Disease & Defense			AAAAGGCTGTGTTTTACTGCCATGAAGTCCATGAAACAACAGCTTTCATGGTTCCATTGCTTGCCGGTGATGGAACCAAAACTCAGGCACTTGCTGTTTGCCACTTTGATACTTCGGTCTTGAACTTTGAATTGTTCCGTCAAATAATGAAAGTTGATCCTGGAACTAACCCTCTTTGCCATTTCCTTGGAAACAAGTCCATTTTGTGGGTTCCCAATTTAGCCACGGAGGGTGCCTCTCAGACTAAAATTGTTGTTTAATTAGTGCATCTTGGGCACCATCAGAAATGTGTGTATTATAAATAAATTATAATGTGATGTTGTGTATTTCTGCCCGCCGGCACTACCCTTTTTAGCTTAGAGCTGGAAATGGAGCTACGAACCTACGTGTACTGTTGTT…
Gma.9504.1.S1_at	CA803130	At1g64160	1e-06	Disease & Defense			TACAGTCACATCTAGTCTCGACGGGCTTCGGAGCATTTCGATCGCCAAGCTAACCCTGCGTTTGAAGCACCACAAGGGCTCCCTTTCCATTGTTGGTGTCACAAACAATGTCAAACCCTCTGATCTTCCAGTGGTAGGAGGCACTGAAGATTTCATGTTTGTGCAAGGCTATATTAGTACTTCTCCAGTTGATCTCAAGGGTCTTACTGTTGTCTACAAGATTGAGTTTCATCTTTACTGGCCCCCATATGCAACTCAAGCCTCATGAACTATGTTGCATGGGTAGAATTTATGTATGTTGTGAATTTTAAGGTATCCCTGTATCTATGGTCATGAAGGTCCTGAACAAGAACAGCCTAATAATTTTGTTTGGAAAATTACCACCTGTAGCGTTATTGT…
Gma.8824.1.A1_at	BU765628	At1g49570	1e-14	Disease & Defense			ACCAGGCTCTTTTGGGTGACAGCACCACTGCTTCACTGGTCAACACGTATAGCAAGTGGCCTCTTATGTTCTTCAGAGACTTTGGAATATCTATGGAGAAAATGGGTCGCATAGGTGTACTCACAGGATCACAGGGGCAAATAAGAACAAACTGTAGGGCTGTTAACTAGATATATATCCGGCCATTTGCATTTGCTCTTTGTTGGCTTTTAGAAAACTTTGCAGAATGCAGACTTCTATTATATAAATGTATAATAATATGCTAGGGCCTAGGAGCATGTTTGTGTGTTTCGATAA
Gma.8449.1.S1_at	AF002258.1	At1g65060	0	Disease & Defense			CAATGCTTCACTGCATTAAGTCAAAGTCCNAGAAGCAGTTGCACTTACACATAATCATTGTATTTTTGTGTCCATTGCCCACCACCATGCCTGTATTGTGATTTTAG
Gma.7980.1.A1_at	BU546909	At1g47128	7e-61	Disease & Defense			GGGACATCAATAGACCATGGTGTTACAGCTGTTGGGTACGGAACAGAAAATGGAATTGACTATTGGATCGTCAAAAATTCATGGGGTGAGAATTGGGGAGAGGCAGGTTATGTAAGAATGGAACGTAATATAGCAGAAGACACTGCAGGAAAGTGTGGAATTGCGATTCTGACATTGTATCCCATAAAGATTGGCCAAAATCCCTCAAACCCAGATAACTCCAGCTAAACCCACCGGGAANTTACAGGAAATAACAGGAAGACTAAAAGAGTTCTAGACTTCTGTTTAGTGGAAGTTATCTAGCCCATGAATGAAAAGGTGAAAAAAGAGAAGATTAGGCCGTACTCATTCTCTATTCTCTAATTTGAACCAGCCATCAAGGCCGTACGAGAAAGATAT…
Gma.8022.1.S1_at	BQ628998	At3g05600	1e-109	Disease & Defense			AGCTGACGACACCATGGACAAGAGTGCAAATCAAGGTGCCTGTAAAATTCATTGCAGGTGAATTGGACATGGTATACACCTCGCTAGGAATCAAGGAGTATATCCACGGTGGAGGTTTCAAGGAAGACGTGCCGAATTTAGAACAAGTGATTGTGCAGAAAGGAGTTGCTCACTTCAATAATCAAGAAGCAGCAGAGGATATCAGTAATTACATACACGATTTTATCAACAAATTCTGATCTGATCCAAAAATGAATTCNACCTGGAATAAAGTCGCAGGATCGTGCAGTTGATGTCAAAGGGTCCAAATTGTTAAGTTCTGTTTTTATTTTATTACTAGCTATGTAACATGGGCGACTCATGTTAGGGCTTATGGCATATTTGGGATGACA
GmaAffx.24201.1.S1_at	BQ740972	At1g05170	2e-98	Disease & Defense			CTGCTGAGAGGATTAAAGAGGTACATAGGAGGTGTGGAGAGGGTGAGAATGCTTTGTGGAGTGCCTCTTTCTAGGGGGCAAAAAAGTGACAGTGGAGTNCTTCCTAACTCAGGAAGATTAATACCAAGGCAATATGAGTCAACCCTGCAAGATTTTCTATTTTTCTTTTTCTTTTTCTATAGTTTTGTGCAGTGTAGAGAAAAATGTCATTTTACACGAGAAAAGCAGGAGTGAAAGAGAGTGTGTGAGAGAGAAATATGATAATGCTTGCCCCATGGACCTTCAACATTTTAAGAGGAGATTGACCATGGGAGCAAGAGATCGATAT
GmaAffx.11893.1.A1_at	CD414188	At5g60870	2e-08	Disease & Defense			GGATTAGGACCTCACAAAGTTTTATCAGTTGCAATTGGTGCATCACATGCCATGTGTTTAGCTTTGANNNNGAGTAGTTGATTTTGTCAGCTGACATGGAAATTTCTTCTTTGACTATAATGCCCCACTGAATTTTGTAAGAAGATCATTGAATTGTCGTGGTCTAATAGTGTATACCCTGATGGGTTACTAGCAGCATTTGTTCTTGGAGTCTAACACATCAAATTGACTATTCTGGATATACCAGAACTCCAGCGTTTACAGTTTGATTGTCCTAAAACCTGATTCC
GmaAffx.40860.2.S1_at	BG509282	At5g58390	1e-08	Disease & Defense			CAGACTTTGCCAGTGCTATGGTCAAAATGGGAAACCTCAGCCCTTTAACAGGAAGCAGTGGCCAAATTCGTACTAACTGCCGCAACGTTAACTAAAAATTAATGGAGAAAATTAATCAATGAGCATTAATTGAGAAAATTAAGCTCGAGAATTATATATGCTCATCCAGTCACAATCTTTATGTGTTATGGTTTTAATTTCTTGGTGTATGGTGTGATACGTAGTCGGTTTATTTTTGTAGTTCTCCAAAAAATTTATGAACTGGCCAAATAAAGAGTGATATTATTCATCCAAAAAAAGAGAGAAAGTGTTGTTATTCTCATACCACTTTTTTGTT
GmaAffx.29692.1.S1_at	AW348396	At4g01700	2e-46	Disease & Defense			GATAGCCTTCAAAACTGCTATGTGGTTTTGGATGACAGAGCAAAAGCCAAAACCTTCATGCCACAATGTGATGGTTGGGATATATGTGCCGACAGAAGATGACATAGCAGCAAACCGAACAGCGGGTTATGGTTTGGTGACTAACATAATCAATGGTGGACTGGAATGTGGGATTCCTGGTGATGCAAGAGTGAATGATCGGATTGGGTTTTTCGAAAGGTATACGAAGTTGTTCAACGTGGACACTGGACCTAACTTGGATTGTGCATATCAGAAACCCTTCTAACT
GmaAffx.65968.1.S1_s_at	BE608057	At4g31870	1e-19	Disease & Defense			ACAAGACCCAGGCAGGTGTCGCAGTACGCGGAGAAAGGACGCTATATAAATATATTTGTCCCCGATGCTCTCTATTTCAGCCACTCGTATATTCTTCCTCCGCTCAACAACTATAAGATTATCTTCTTCTTCTTCTTCTCTTCAATTCTTCTCCAATCCCAACCGCACCCTCTTCCGTCCCTTTCTTCACACTTCCTTCAAACCACTTCCTTCGTCTTTCTCTTTCCGAACAGATCACACTATGGCCACCTCAAACGCCAAATCAGTCCATGATTTCACCGTTAAAGATG
GmaAffx.52146.1.S1_at	CA934966	At3g04720	2e-46	Disease & Defense			TTTGCATTCTGGCATTGGCCTCTGCTCAGAGTGCTACAAATGTGAGAGCTACTTATCATTTGTACCAACCTGAGCAGCATAACTGGGACTTACTCGCAGTCAGTGCATATTGTTCAACTTGGGATGCTGACAAATCCTTGGCATGGCGCAGCAAATACGGTTGGACAGCTTTCTGTGGACCCTCTGGGCCTCAGGGCCAACAATCTTGTGGCAGGTGCTTGAGGGTGACAAACACTAGAACAAACGCTCAGGAAACGGTGAGAATTGTTGATCAGTGCAGCAACGGGGGCTTGGACTTGGATATTGGTCCGTTCCAAAAGCTGGACACTGACGGGAATGGCATTGCTCAAGGCCATCTTATTGTTAACTACGA
GmaAffx.57668.1.S1_at	BM567837		1e-07	Disease & Defense			GGGAAACACACATGCCAAGTTCGATGTCATCATTAACGCCGATGATTATAACGAAATCCGCCCCGATCACGCCGAGTTTGCAGGAAGCTTTGCGAGTCTGCCTCACTCAAATAACAAAAAGATCGTTACTTCCATGAGTCTGGGATTAACGGATTTGTTGGAAGATTTGGGCGCTGACGATGATGACAGTGNNNTCGTCACGCTCGTTCCCAGGGATGGACGTGTCAAAATCAGAGCCATCAAGACACGGCTTCTTGCAGAGTGAAGGAAATACTTATGCATATAAATAAATTTGTGGGGTGTAATACTTGTATTATAGGTTAATTTTGTTACTGCTTTTTAAATTATGGAGACAATTTATAATTGTGCTTGTATTTTATATTAAGAAAAATTTAAAAG…
GmaAffx.71331.1.S1_at	AW597101	At1g53290	5e-29	Disease & Defense			AATAATCTTGAACTTTGTGCTCGAGAGTGCACATCCACGTCAATTGCTGTGTGGGACATTCCAAAGTGTTCAGGTCTCTGTAATCCAGAAAAGAGAATGTTGGAACTGCATCAAAAGGAAAGTTGTACTCAGAGTCCAACTGTGGACTCTGATGAATAGTATTTGTTTGTATATTTATGAGGCGAAGGTGAATTGCCTGCTCTTGTTATGTTTAACTTCCGTGAGCAGCTACCATTGCATCCTTTTCTATCCATTGATCTTTCTCTTTTTGA
GmaAffx.90350.1.S1_s_at	CF809070	At1g05850	1e-78	Disease & Defense			TCCAGAATACATAGAGCAGAATGCCACCCTTGCTTTCCAGGCTGCNATTTGGAGATGGATGACACCAATGA
GmaAffx.88880.1.A1_at	CK606277	At5g02380	1e-08	Disease & Defense			AAGGCAACCATGACCTTAACACACCCATCACAAGTCCAAAACACTTGAACTTGCTCAAGGGCAAGAAATGACCACTTTATTCTAAGGGTGTTTGTTTAGACACAAAACACCAGAGTGCAACATAATACATACTACATAATTTTGAAGTTTTGAAACTACATATAGTTTTTATCATTATTTCTAAGGGCCATTTCTGCTTGAAGCTTTAGCTCTCCAACACCTCACTTGCAAGTGCAGGGGTTGCAGGTGCAGTTAGCTCCACATTTGCAGCCATCGTTCTCAGCGGGAACACCCATTTCAGCACTCTCGAATTGAGCCTTAACTGGTGCCACTCCCATGACCAAGGTCTCGGTGG
GmaAffx.88993.1.A1_s_at	CK605690	At2g38380	3e-36	Disease & Defense			AACCACTCCTGATACATTGGACAAGAACTACTACTCCAATCTTCAGGTTAAGAAGGGTTTGCTTCAGAGTGATCAAGAGTTGTTCTCAACACCTGGTGCTGATACCATCAGCATTGTCAACAAATTCAGTAGTGACCAAATAGCTTTCTTTAAGAGCTTTTCGGCTTCCATGATTAAAATGGGAAATATTGGTGTGCTAACTGGGAAGAAAGGAGAAATCAGAAAACAATGTAACTTTGTTAACAAGAAATCTGCGGAACTTGATATAGGTAGTGTGGCATCCGAATCAGAAGAGGGTCTGGTTAGCTCAATATGAATGAATTAGGAAGAGTTTTATATACACTAGGAAATCATGTGATTGAAGGTTACCAATAAAGAAGCTATATATAGGCACATTAT…
GmaAffx.83299.1.S1_at	BI701165	At1g17860	1e-20	Disease & Defense			GTGGTGACTGAGAATAATGATCCGTTATTGGTTCACTTTAAGAAAGTTGAAGTTGAATCATCAGCTACTGCTTGAGGTGGCCTTAAAAAATCATGTGGTTTCTCGTAGTGTAAG
GmaAffx.83583.1.S1_s_at	AW201851	At3g23800	4e-19	Disease & Defense			GGTGGACTGAAAATCAACCCCAACTTCTTTGTGGACTTTGGAACTGAGCCTGATGGTCCTTCTCTTGCCCATGAGATGAGATATCCTGGTGGTGACTGTACTTCAGATATATGGATTTAAACATACGTGTCATTATTTCCCTTTAATAAACGGATCTGTCATATGGTTGTAATGNGCTACTATGCTATAAATAATGCTCTTGTGAATCTTCAACTTTTTGAAGACAGTTTGCAAT
GmaAffx.90090.1.S1_s_at	CF805815	At3g04780	4e-09	Energy			GATCGTGCTGCATGGTACAACAGTTGAAACAACAGACATGAAGGGTCTGAAGAAGATTGAGGATCATTAACCCCTGGAAAGAGGAGATTCAACTTTGCTCCTAATCCCTCCTTAGAAATTTTGATTGGAATTGTAATGTTAACTTGGTGAATGATGGTTTATGACTTCTAATGTCTATCTG
GmaAffx.91300.1.S1_at	CF805768	At5g17770	1e-101	Energy			TACCAACCTGGCGAGGTTAGGGCTTTTGGGATGCTTGCNGNANGNNCTGGAATCACCCCAATGTTCCAAGTTGCCAGAGCTATATTAGAAAACCCTAATGACAGGACCAAAGTACATCTTATCTATGCCAATGTTACGTATGAGGACATTCTTTTGAAGGAAGAGCTGGACGGTCTTGCTTCTAACTATCCAGATCGATTCAAAATATACTATGTGTTAAATCAGCCTCCTGAGGTATGGGATGGTGGTGAAGGATTTGTGTCAAAGGAGATGATTCAAACCCATTGCCCTGCTCCAGCACAAGATATTAAGATATTGAGATGTGGCCCACCACCTATGAACAAGGCCATGGCTGCACACCTTGAAGCCCTTGGATATGCTTCTGAGATGCAGTTCCAG…
GmaAffx.91300.1.S1_s_at	CF805768	At5g17770	1e-101	Energy			CAATGTTCCAAGTTGCCAGAGCTATATTAGAAAACCCTAATGACAGGACCAAAGTACATCTTATCTATGCCAATGTTACGTATGAGGACATTCTTTTGAAGGAAGAGCTGGACGGTCTTGCTTCTAACTATCCAGATCGATTCAAAATATACTATGTGTTAAATCAGCCTCCTGAGGTATGGGATGGTGGTGAAGGATTTGTGTCAAAGGAGATGATTCAAACCCATTGCCCTGCTCCAGCACAAGATATTAAGATATTGAGATGTGGCCCACCACCTATGAACAAGGCCATGGCTGCACACCTTGAAGCCCTTGGATATGCTTCTGAGATGCAGTTCCAGTTCTGATTCTCTTCATCGGGGGTGCTTAACATTGCATGCATTTCATGGCCTTGGCCAT…
GmaAffx.93326.1.A1_s_at	CF809051	At4g26270	3e-08	Energy			GACTTGTTCATCTACAACTGTATTTGGGGACATGTTTTATCTTTTTGACTCAAGCCCTACAACCTCCAAAGCCTGGAGTATTGGGAGCTGTTCTTTTTGTCCTTTTCCATGTTTTGCAAGTTGGTACGTCTTTCTTTATAAAGACCTACTACCGTCTTGCGTGATTGTTGTACTCAGAAGATTGCTGAATTTTAACCTGGGTCATT
GmaAffx.92910.1.S1_s_at	CF806558	At3g52300	6e-58	Energy			GAAAATGAGCGGAACGGTGAAGAAAGTNANCGATGTAGCATTCAAGGTGGGAAGGAACATCGATTGGGATGGAATGGCGAAGCTTCTNGTCTCCGATGAGGCTCGCAGGGAGTTCTCCAATCTCCGTCGCGCTTTCGACGAGGTTAACTCCCAACTCNAAACCAAGTTNAGCCAGGAACCTGANCCCATNGANTGGGATTACTATAGAAANGGAATTGGCACTCGNTTGGTGGATATGTACAAGGAGCATTATGAGAGCATTGAGNTCCCCAAGTTTGTTGANACAGTAACTCCTCAATANAAGNCTAAATTTGATGCCCTNTTGATTGAGCTTAAAGAAGCAGAGGAGAAATCTCTGAAGGAGTCTGAGCGNTTGGAAAAGGAAATTGNTGAAGTACA…
GmaAffx.93028.1.A1_s_at	CF808753	At3g52990	3e-51	Energy			GCCAGTACTATCTGTTGTGATCCCCCGACTCAAGACAAATCAGCTAAAGTGGAGCTTTAGTGGAGCTTTTGAGGCAAGACAATCACTTATCGTGAGAGGTCTCTTTCCTATGCTTGCAGATCCACGACATCCTGCTGAGTCAACAAGTGCAACAAATGAGTCTATTCTTAAGGTTGCCCTTGATCATGGAAAATCATTGGGAGTTATTAAGTCACATGACCGGGTAGTTGTTTGCCAGAAACTTGGTGATGCATCTGTGGTTAAGATTATTGAGCTTGA
GmaAffx.93056.1.S1_s_at	CF808781	At2g27510	9e-34	Energy			TTGCCGAGCCGGAGCATGCTCTACCTGTGCTGGGAAGATTGTTGCTGGTTCTGTGGACCAGTCTGATGGCTCATTCCTCGATGACAACCAACTGAAGGAAGGCTTTGTGCTTACTTGTGTCTCCTATCCAACTGCAGACTGTGTAATTGAAACTCACAAGGAAGGAGATCTCTATTGAGCAATGCTGGCCTTAAAGTTGGGAATTGGGGAATTTAAGGTAGACTCTGCAACTTGTTTGCTTGTTCTGCTTTAGAGTCAAATTTTCTTTTGGGATTATTAGTGATTTGGTGTAATGATTTTTTGTTTGTGCAAGCAAGCACTGTGATATTAAGACGATAAACACCCGTCGT
GmaAffx.92537.1.S1_at	CF808262	At1g11530	7e-33	Energy			AAAATTGATTCCTTGTATGTCACAAATTCCAAGTGGTTGATCTTTTGTTATTTGTATAAGTTTCGGTGTGT
GmaAffx.80939.1.S1_at	BE607604	At5g40760	3e-20	Energy			TTACCAACCTGGAACAAGAGGTCCTGTAGAAGCAGATAAATTACTGCTGGAAAAAGCTGGTTATGTTCAAACACATGGTTATAGATGGATCCCTCCAACATTGTTGAAAGAACAATGTTACACTAGCTTGCACTACCTTAAAATTTGTTGATGCGTGCACTTAATAAGCTTGGGAAAATCCCCTTGGAGCAAGACTCTTCCCTAATGGGTGATTTTATCAAGCATATGAATAAATGTGGTTGACATTGTATATTTAATATTATCTGCCTACGAATGCAGAAGAATAAGTGGTTGACATGGTGCATGTTACGTTATTTGCTTGTG
GmaAffx.32146.1.A1_at	BQ273585	AtCg00600	9e-14	Energy			ACCTCATCTCTATTTATTGGTCTGAGTAAAATACGACTTATTTGATTTGTAATTTTGAGAGGAATAGTCAATTTTGGAATAAGACATTCTATAGTTCCTTACTGTGTCAATTTACAATTCTCGGTCGTTGAGATTCATGATCAATACAGATTAATGGTTAAGGATAGATATTACCTTTCTTTTTACCTTTCGAACAAATAAAAATGATTGAAGTTTTTCTATTTGGAATCGTGTTAGGTTTAATTCCCATTACTTTGGCTGGATTATTTGTAACTGCATATTTACAATACCGACGAGGTGATCAGTTGGATCTTTGATTAATTAATGTCTCTTTTTTTGCGGATTCCCTATTTTTTTGTTTTAATCCTAATCTACAAGGATTAAATTCAGACTTTTTAA…
GmaAffx.35832.1.S1_at	AW459932	At3g24170	1e-170	Energy			GAAGCTTGTTGTTGATGCTGAGACAGATAAGGTTCTCGGAGCCTCAATGTGTGGNCCTGATGCACCTGAAATTATNCAGGGTATTGCTNTTGCNTTNNAGTGTGGAGCTACCAAGGCACAGTTTGATAGCACGGTGGGAATACACCCATCGGCTGCNGAAGAATTTGTAACCATGCGGTCAGTGACAAGGCGCGTAGCNGGAACTGGAAGTGNCAAACCCAAGACCAATTTGTAAAATGTTTAAAANGAAAATACGATNTGCTTGATGGTNGTGTAAAGATGCAAATGACTTCTTTTGGTGACCTTCCCATTACTATAGATCACAAACCCATCTGTTTTTCTTTCCCAAAAAAATGTTTGTGTTTTTTTTTTCTTTGCGAATTTCATTTTATTTAAAAT…
GmaAffx.19546.1.S1_at	BE583628	At5g17770	1e-120	Energy			GAAATGAGATTGATAACACCATGTGCTAGAGT
Gma.9944.1.S1_at	CD398368	At2g20260	2e-28	Energy			GAGAAATCATCATGGCATCAGCAGCATCTGGGTTTGTGNTGTCNCTTAATGTTGCAGCTNCCACCACAAACTCAAGGGTGGTCNTGTTCAACACNAAGAACAACNCTTCTAGGNTTNTTGTNAGGGCTTCAGATGAGCCTGCAGCGGCGGCACCCGCCACCGCCACACCCCCAGCTGAAGCTGAAGCNAAACCAAANCCACCACCTATTGGCCCCAAGAGAGGTGCTAAGGTGAAGATTCTTAGGAAGGAATCNTACTGGTACAAAGGCACTGGTTCAGTGGTTGCTGTTGATCAGGACCCCAACACTCGCTACCCTGTTGTGGTTCGATTCAACAAAGTCAACTATGCCAATGTATCAACAAACAACTATGCTTTGGATGAGATNGTGGAAGTGGAAT…
Gma.7343.1.S1_a_at	BU548960	At4g21090	5e-65	Energy			TTGCGTGTTCAACTTGCCATGTTATAGTCATGGACGTAGAACAATACAATAAATTGGAAGATCCAACTGATGAGGAAAATGACATGTTGGATCTAGCTTTTGGGCTTACTGAAACATCACGTCTGGGTTGCCAAGTGATTGCTAAACCCGAACTTGATGGAATTCGTTTAGCTATTCCTGCTGCCACTCGGAACTTCGCTGTTGATGGTTATGTGCCGAAAC
Gma.6029.1.S1_at	AW309628	At1g76760	3e-44	Energy			CCTGTGTTGGTTGACTTCTATGCAACCTGGTGTGGTCCTTGTCAATTNATGGTTCCCATACTCAATGAAGTNAGCACTCGGCTTNAGGATAAGATACAGGTGGTGAAGATTGATACTGAGAAGTATCCNANCATTGCTGACAAATACAGAATTGAGGCGTTGCCGACTTTCATCATGTTTAAGGATGGAGANCCTTATGATCGCTTTGAGGGAGCATTGACTGCAGATCAGCTCATTGAACGCATNGAAGCNGGCCTCAAGGTTAAGCAATAACCCTACTATAATGAAGACACANNGAAGCTTGTCTATTGGAATGTTCGATCACATACATGATATGATTGACTGGAATCACTTGTTNNNTCAACATCATTCAGACATTTTTNGAAGNGATTAATGTAT…
Gma.5427.2.S1_a_at	BM885334	At1g15690	1e-103	Energy			TTGTCATGCTCACACCACTCATTGTTGGAATCTTCTTCGGGGTGGAAACACTTTCAGGTGTTCTTGCCGGGGCTCTAGTTTCTGGTGTACAGATTGCAATATCAGCATCCAACACTGGCGGTGCTTGGGATAATGCTAAGAAGTACATAGAGGCTGGTGCGTCTGAGCATGCAAGGACCCTGGGCCCGAAGGGATCTGAACCACATAAGGCAGCTGTTATTGGAGATACCATTGGAGACCCTCTTAAAGATACTTCAGGTCCTTCACTCAACATCCTCATCAAGCTCATGGCCGTTGAGTCGCTCGTCTTCGCACCATTTTTCGCCACTCACGGTGGCCTGCTTTTCAAGATCTTTTGATTTGAGGGTAGAGTTTTCTATCAATTTATCCTATTTTTCT…
Gma.4359.2.S1_at	BI968877	At1g11530	5e-36	Energy			TGCCACCAATAAAAAGTACCCAGTTGTGGTTCATTTCTCTGCTTTCTGGTGTGTGCCTTCTATAGTTATGAATCCTTTCTTTCAAGAATTAGCCTCCACCTATGAAGATGTTTTGTTTCTGACGTTGGATGTGGATGAGGTTAAGGAAATTGCTTCCAAGATGGAAATCAAAGCCATGCCCACCTTTCTGTTACTGAGTGGAGGGACTCCCATGGACAAAATTGTGGGTGCAAATCCTGATGAAATAAGGAAAAGGATTGATCATTTTGTTAACTCANCTCATTCCTACAAATCTGTGTAAACCATGCACATGATGAACAAGGAGTTGGCCAAATCCTAGAACTGTTGTTCATTGTACTAGGAACCATTTCATATATGTTTTATATTCCAAAGTAATAT…
Gma.350.1.S1_at	D10717.1	At1g53310	0	Energy			GAGACCCAGGGATAGCTGCTCTTTATGATAGGCTCCTTGTTTCAGAGGATCTGTGGTCATTTGGGGAGCAGTTGAGGACCATGTACGAAGAAACCAAGGAACTCCTCCTTCAGGTGGCTGGCCATAGGGATCTTCTTGAAGGAGATCCATACTTGAAGCAAAGACTGCGCTTGCGTGATTCTTATATTACTACCCTAAACGTGTGCCAAGCCTACACGTTGAAACGTATCCGTGATCCAAACTATAATGTGAAGCTGCGCCCTCACATCTCCAAAGAGTCTATAGAGATAAGTAAACCTGCTGATGAACTTATAACACTTAACCCAACAAGTGAATATGCACCTGGTTTGGAAGACACCCTCATTCTCACCATGAAGGGTATTGCTGCTGGCTTGCAAA…
Gma.3856.1.S1_at	BE822875	At3g51390	4e-12	Energy			GTACAAGGAGCACCATATACGGAGTCGAACCATTGCCTACCCCTGAAGAGATAGAGGAAAAATCAAGGCCGTACACATGCTTGGATGCTGTAACTNNNNNNNGTTNTTNNTNNTTTTTGTACAAGTAGAAGTCTTTCCGTCTAGTAGTTTAATCGTGAAAACTCAGAAGTATGTCGATGTACCCTTTTGCTTTAGATGGGTAGGTGTTATCTTTAGGCAATTTGCTTCATGACATCTTCTGTTCTTCATTTTTTCCCTAAATTTTGGAGGTAGAGTTCCAAGTTAGATGTACAGTTGCAGTGCTATTGTGTTGTTTTGTTTTTACTGTTTAGTCTGTAGACCTGGATATCCAGCTATTATCAAACCGACTACTGCCTGGAACGCTAGAGAC
Gma.3871.1.S1_at	AW349536	At3g18410	2e-47	Energy			GGGCAAGGACGGTCGCCACCCATCTCTCCACGCTCCCAAGGTTGACCCTGTTGAGTCTGAATGACCTTCCTGTGGACAATAATAACAAAAAAAAGGGAAGACCGTTTATCCAACTNATCATATTGCTGAATCGGATATTGGGTTGGAGAAGTGNTTGTTGCAGTTATTGTGTTCATGTTCTTTTTNTTTAGTTGAACTTCCTGCAAACTACAACTGTATTTTGACTTAGCCTTGGCTATTTTTCCTTGGCTCATTAGTCTTATGTTGTTTGTTACCATTTAAATGTAAACAAGNAAGGAAAGGCTATNAACAAAGTACATCACAATCAGATTATGAAATAAGTTTATTCGTTCCCTGTTGATTGTANATGTTATCCATTCCGAATATTCAAAGT
Gma.3871.2.S1_s_at	AW351109	At3g18410	5e-47	Energy			GGGCAAGGACGGTCGTCATCCTTCTCTCCACGCTCCCAAGGTTGAGCCGGTTGAATCTGATTGATTGTCCTGTGGATAAATAAATAAAAAAGAAGGGAAGACTGTTTATCCAACTGATCATATTGCTAAATCGGAAACTGGGTTGGAGGAGTGCTTATTTTGCAGTTATTGT
Gma.10919.1.S1_at	AW348585	At5g53560	7e-35	Energy			ATCCTGGAGGAGATGAAGTTTTGGTAACGTCAACAGGGAAGGATGCCACCATTGATTTTGAAGATGTGGGCCACAGTGATTCTGCCATAGAAATGATGGAAAAATACTTCGTCGGGAAGGTTGACACTTCCACTCTTCCAGCGAAAGTTAACCATAGTCTGCCACAACCTACACAAGCAGGTGGCGCTGGCAATCAATCTTCTGGATTTGTTGTAAAGATCTTGCAATTCCTGTTGCCATTCTTGATATTGGGCCTTGCCTTTGCCCTGCAGTACTATGGCAAAAAGAAGCATGCTAGCACCTCATGAAATATGAAGTTGAGCTAGAGCCGAAGTTTCATTAGGTTTGTTAATTCATTGCCTACTTCAATGCAGTATTAAAGNGGTAATAGACTTTAGT…
Gma.10771.2.S1_s_at	BU762116	At4g10040	8e-58	Energy			TGTTTACTTTGTTTTGCATATCCGAATGCAATGCGTACTTATATT
Gma.13980.1.S1_at	CD412403	At1g14730	2e-41	Energy			GCCCCATGGCACGTAGCAGGTGGTAGAGCACTATTTTTCATGGCAATATGTGCTGCACTAACAGGGTTGATGGAGAAGTATACTATGTTAAAACCCGCCCTACACCAGAGAGAATCTCATTTAATCAACTTCACGGGTCTAGCTATTCTCTTGTTTGGAGTCTTTGTGGATATGGCAGTGGGTTTGGCCCGTTATGCCTGAAATATTACTTCATTTAATTTTCTCCACTTCCATGTACTTTATTCCAATTCGATTGATCCAGCATTTCTACATTTTTTTAATTTTTATTTTGTTATTGTGTTTTTATTTGCTGGAAATGGCTTGTGTAATTTTATTTTTCTTACTATCTTTTGGACTTTTGTGGGATATAAGTTGACTCTTGTGGAAATGATTTGTTTT…
Gma.1674.2.S1_at	BU546187	At2g27510	2e-14	Energy			AACTGGGAATTTAAGCAAGCACTGTGATCTTAATTAATAAGACGATAAGCACCTTCGGTTGGCTTTTAAATGTGGTAGTTGTTTTTTCTTTCTTTTGCTTCTTTATTCGGTTCTTTTAATGTGTTTCT
Gma.16636.1.S1_at	AW705534	At3g15020	2e-52	Energy			AATCAAATTTGCCAACCAGTAATTGAACATGTTATCACATAC
Gma.1659.2.S1_a_at	AW704429	At3g07100	1e-100	Intracellular Traffic			GACTGTTGAAACTTCTCTATCCTAGCTTAATTCGACTTGATGAATATCTTCTGAAGGCATCTGTACAGGCTNATGACTTAAAAAGTGTTGAGAGAAGGTTACCTTTGACTGGGGAGAGCTTAGACTCTAGAGGNCTTTATATTTATGATGATGGNNTCCGGTTCATTATATGGTTTGGTNGGGTGATTTCACCTGATATAGCNAAGAATTTACTTGGGGCAGACTTTGCNGCAGAANTATCAAAGACTACTCTCAGTGAGCATGATAATGAAATGTCAAGGAGGCTGGTGAAGGTACTTGAGAAGTTGAGANATACAGATCGTGCATATTACCAGTTGTGCCACCTTGTGAGGCAA
Gma.14354.1.S1_x_at	AW755388	At5g59840	4e-92	Intracellular Traffic			TGTACCTACCTCCAAAGGGCAAGCACTTGCTGATGAGTATGGTATCAAGTTCTTTGAAACTAGTGCAAAAACCAACATGAANGTGGAAGAGGTNTTCTTTTCAATAGCAAGAGATATNAAGCAAAGGCTTGCAGACACAGATTCAAGAGCTGAGCCTCAGACTATCAAGATTAACCAACCNGACCAGGCANCCAGTGGTGGTCAACCTGCNCAAAAGTCGGCTTGCTGNGGTTCATGAAAAGAATCAGTATCTGTAGNAAGAGGTGCANNGGTTTCTGCAATAGCACTCNTCTGGGTGCTAATGTTATTCTGATGACATTANAANGTGGGAGCATGTATTTGTCCCTCTGTATCTCCCAACTGCAGATGTCNTNTTTTAAAGTTAATATTTTAAATTCT…
Gma.1537.1.S1_at	AI416863	At2g33120	1e-94	Intracellular Traffic			GTTGGACTTGTGATAATCCGTGCGTTTGTGTGTGAACGTTTTATCCATCTTCGAGGCCTTGCTTATGTTCTAATTCTAAACGCTAGCGGTTTTTG
Gma.10225.1.A1_at	AW704572	At4g24550	7e-20	Intracellular Traffic			CATAATGTTTCACGGCTTCAGGTAAAGTATTTGCAGATAGCAAAGAAATCTGCAACTCATGAGCCATACCGGTGGGTTAGATATGTTACACAGGCAAATTCCTACGTCGCTCGTATATGATGCTGTTAAGAAAACTGTGGCCTCCCCCTCCCCCCTTTGTTTTTCATTTTTATTTTCCTCCCACAATTGCTCTTTACAGTTTACAGACATGCTTTGATTTTTTACTTTATTCTTTATTTGTAAATTACATTCTAAGTCGAGTATAGATGCCGTTTGTAGTTTGCCTTATTTATCATTC
Gma.13222.2.S1_at	BE440348	At1g11890	1e-100	Intracellular Traffic			GTCTTCCTCTAGCTGAAGGTCTGGATGATGGTCGTGATCTTAAAGATGCGGAATTTTACAAACTGCAAGTCAAGGCTTTGTTTAAGAATCTCTCAAGAGGACATTATGAAGCATCAAGGATGTCAGTTGAAACTGGCCCTTATGTTTTTCATTATATTATAGAAGGACGGGTCTGTTACTTGACAATGTGTGATCGTGCATACCCTAAGAAACTAGCCTTTCAATATCTTGAAGAGCTNAGGAANGAGTTTGAGCGTGTTAATGGGTCTCAAATTGAAACTGCTGCNAGACCTTATGCCTTCATTAAGTTTGATACATTTATGCAGAAGACAAAGAAACTTTANCAGGATACNCATACTCAGCGCAATATTGCAAANTTGAATGATGAACTCTATGAAG…
Gma.13131.1.S1_at	CD411154	At5g11490	3e-61	Intracellular Traffic			GTATAATCAACACATCGTCAGCCAAGTCACAGATTAAAATAAAAGCTGATGACCAAAGTTCATCCCAGGCATTCTCTACTTTATTCCAATCAGCCTTGTCCAAATTTGGTTTACCTTAAATCTTTATGGTGCCTTCAGAGCTTTGAAATCAGCTGTTATGAAATGTTGCAATCCTAGATTGAATATATAAGGGAATGGAGGATATTGACTCCATACCTCCCCCCTCCCCGAAAGAGAAAGAAAATTCAGATTGATGTATAACAGGAAAATGCAGGGGGGTTCCATTGGCTAAAAGATTTTGTAGTTGTTCTGTATCCNAATCATCGTGATCCATCAAATATTCAGTTGTAGAAAACCTAGTCTGGGTTGCAAGTTTGTAGAGGTTTTATGTTGATGTTC…
Gma.2741.1.S1_at	BQ610111	At5g22360	2e-98	Intracellular Traffic			GAGATACGCACTATCATGGTGGACAATATTGAGAAAATATTGGAGAGAGGTGACCGGATTGAGCTTCTTGTTGATAANACAGCAACAATGCAAGACAGTGCATTTCACTTTAGNAAACAGTCAAAGCGCCTTCGAAGAGCTCTTTGGATGAAAAANTTTAAACTCCTGGCCTTATTGACATGCTTNATTGTTNTTGTTCTTTATTTAATAATCGCTGCTTGTTGTGGAGGCATCTCTCTACCGTCCTGCAGATCCTAANTTGTCACTCNNGCCAGTTTATTTNTTTTCTGAGCTCTGCAACTATCAAGATCGTNCNNGNNNATANGNNCATTGGACGACACTTAAGTATTCCAGATTCAAATTTATGAGCTGAGTGGATAAATTTGATAAAGGATTCAG…
Gma.2422.1.S1_at	AW309656	At5g05010	1e-125	Intracellular Traffic			CAGATTCATCAGTGTTCTTTCCCATTTCAGTCCGCTTTATGGCAACTGATACTTTTAGTGACCTGAAGGTTACCAACATCATACCATTAAAGGGTGGCAATCCTCCCAAATTTGCTCAGAGAACACAGCTGATAACGGATAGCTACCAAGTTGTGTGATTGACTTTCTTGAATTTGAGCTCCTATAACAGTTTTGCTTTTACAGTCGTAGTTCTTTTNATCAATAGGCCATGCAAAGTTGTACTTGCCTCTATTCATGAATTTGTACTTAGTTTTACTTCGCAAGACATGGCGCAAAGTATGATTTACATAATTAATGCTAAAGCGTGTCTGTTTTACTCTANNNNANNNATCTTTTATGGGGAAGGATGCATTGCCTATCTTCCCTTTTCTGCGTTAT…
Gma.1966.1.S1_a_at	BE657930	At5g05010	1e-118	Intracellular Traffic			GAACCATCAGCATTCTTCCCCATTTCAGTTCGTTTTATAGCAACTGAAACATTTAGTGACCTGAAGGTCACCAATGTCATACCGCTAAATGGTGGTAATCCTCCCAAGTATTCTCAGAGAACACAGTTGATCACAGAAAACTACCAAATTGTGTGATCGATTTTCCTCTTGACACTGAGCTTTTATGACAGTTTTGCNTTTACATTNGTGATTCTTTTATCAAAGGGCTTTTCTTTGCCATGTTGCA
Gma.18004.1.A1_at	BE190655	At1g32050	5e-16	Intracellular Traffic			GAGACTTTCTCCTCAGGATTTTGCTCCGGGCTTCTATAATGTCTGTCACTTCACAA
Gma.4171.1.S1_at	CD401267	At5g17060	3e-98	Intracellular Traffic			ATACAAGGCACTTGTGCTCTTCGGGGAGATGGTCTTTATGAGGGTTTGGACTGGTTGTCCACAACTTTGAAGGAGAGACGAGCTGCTGGATACTCTTCAATAGGACTAGGAACTTCATCCTTCTAATTTTCAAGAGGTATTTTGGCAATGGACGAATGTGTTGAGTGTGTGGCCAGTTCTAAGTTGATGTGATCGATAATCAAATATTTTTTGGGTTACATCTGAAGCTCTCATTAGTAGAAAGTTGCTTCGCCTTTCAGGGTGCTTTAGATATGTATGCGACTTTGCTCCAATTATACAAGTTTGTGCATGACGAATGATTAACTAAATTCTTTTGCGATATTGATATCCCTTATTAAGTGCACTTGTACTGGATAGAAGTTAACGGATACTGGATCA…
Gma.4528.1.S1_s_at	CA802816	At5g19820	2e-76	Intracellular Traffic			CCGCAGCAACAACTTGCATTGCAATCTATCCTTTCTACATAGTTGTCATTGCTTTGCTGCATATCCATCATTTCTTCATAGCATCTGGCTTGGCAGTTGGTGTCTTGCTCTTTTTGGGAACAAGCTTTTTCCAGTTTGGTGGTCTCTATATTTGTACCCATTCTTTTTNCCATANGNTGGTTTCCATCATTCATTCTTGCATGGTGTTCTATANNNNNNNNNNNTCAGTTTTGAGANTGCAGAGTCAATTGTGATTGGAAAGGGAACTTTCTNTAGAATGTGTATATTATGAGTGTTAATAGTGCGATTGAGTCCAAAAGAGGAGGTTAGGGAATTGTGGCGTGGGAGCTTCTCGTTNTATTCCTCNATTGTTTTTTCTTACCATATTGCGTGAG
Gma.4698.1.S1_at	AW309918	At5g60860	3e-92	Intracellular Traffic			TGTTCCACATAGTTTGTTTGAGAGAGATATACAAAAGAGTCTTTTGGTTATGCAGTGTAACAGGATGTTTTTGTGAACTCATTGTTTTATTTTGTTTAGTTCTTTTTTGGTTGGTGATGTATACGATTGATTGGCCTCAGCTGCCCTT
Gma.5822.1.S1_at	U42608.1	At3g11130	0	Intracellular Traffic			TCCTGCAGTTTATCCGTGAGTACACTGGCAAAGTTGATGAACTGGTGAAGGATAAAATAGAAGCGCAGAACCAAGTGAAAGCTAAAGAGCAAGAAGAGAAGGAAGTAATTGCTCAACAGAATATGTATGCTCAGTTGTTGCCTCTTGCTTTGCCTGCACCGCCAATGCCTGGAATGGGAGGAGGCTTTGCCCCTCCCCCTCCAATGGGTGGATTGGGGATGCCTCCAATGCCACCTTTTGGTATGCCACCCATGGGTAGTTACTGACAGATAAGTTCGGCAATGAACTCAAGTGTATACCGAGAGCAGTGTAGCAACTTGGGAGTTTTCAAACATTTTCTTTTGGTGTTTTAATGCAGTATTCTTTCCTTGCTTCTAATGGAAGAGGAGGTTCAGGTCA…
Gma.5837.1.S1_at	CD417104	At1g71270	1e-76	Intracellular Traffic			GAGCCACTAGTGAAGGATTTTGCGAGTAGGTGGAAGGCTGCAATAGAGCTGATGCATAAAGACGTTATCACTTCTTTCAGCAACTTCTTGTGTGGTATGGAGATNTTAAGGGCTGCNTTGACTCAGTTGTTGCTTTATTACACAAGACTCTCGGATTGCATCAAGAGGATCGTTGGTGGTTCTGCATTGAACAAGGATCTTGTTTCCATATCTTCAATCATGTATGAAATTAGGAAATACTCGCGGACTTTCTAATTTGTCGAAGATGCCATAGTTATATACTGGATCTAATTCACAATCAATGATATTCCATTCAGTATTATGCCAAAAAACAACTCTCTTGGATCCTGTATGTAAACGAAAGATAGTTTGCTTCTTTCGGGACACCCAAATAAGTGA…
Gma.6298.2.S1_s_at	BU080611	At3g62290	1e-100	Intracellular Traffic			GCTTTTTGGGTGTCTTGTGGATGCAGGGGTGAATATTATCTGGTTTTNTTTTTTGGTTCTCTTCTGAGACACATTGGCTTTATGTTCATGTTTTCTGGTTTAGGACATCTTGATGGCTAAAATTATAGCAGGAATTTGTTTCATGGGATGTCTAATACTTTTGAGTTTTTTTATTGGGCTTGGATT
Gma.6196.1.S1_at	BE058075	At4g33650	1e-22	Intracellular Traffic			AATGGAGGGCCATACACGTCAGGTTNNNATCCAATGGCTGNTGAATGANCTNGCTGATTGTGCTTGTTAGTCCAANAAATTTGACTCAGCGTTTAATTATTTGTTTATGCTTATGCAATTTTTGAGGTTTGCAACTCCTCCTGGAGCTGGACTGCATTCAGTTACTATTTTTCCCATTAAAATGGTCCTGAGTGTTGGTGGGTGCTTTCTTTATCTAAGTTCCCTTTTGTTCGCATATAGCGTTATTTACCAAGGCTCCGGAAAGAATAATAGGAGCAGATGATTTTTCAGTTGAGAGAATTTTTTCACTGTATTCATGTATATTACTATTACCATTTTTGTTGGTGGCTAGTCAGCTATTGTTCATAGCAATTTTCTAGATTGATGCATTTTTTCATT…
Gma.6586.1.S1_at	CA800380	At3g51670	5e-68	Intracellular Traffic			AAAATGGTACTCTCGGCTGACAACACTGCCTCAAGGAGGAAAAAGGTTGCTGCATATCGCTACGTTGTCCGCAAAAGCAGCACCATTTGAGAATGGCTATTATTAAATAGTTTCTAGGACCTTCTTTATTAATTAATATCTTGCTTGTGATGTTACTTTTTCTACCTTTTTTTGGGTTAAATTTTTAGAGGGTCTTCTTATTTATGCTTCTGAACTCATTAAAAGCCTGTTTCACAGGNTATTAACTAGTAGTAGTTTATTAACTAGTAGTAGTTGTGGTGGTACTAATGTGATGTAAAAAAAGAGAGAAAAAATGGTTGTTGTGGTGGTGGTAGCATATGGCTTGGTATAGAAGGAAAGCAAGTAAGTTTGCTTATATAGCATTACCAAATTACTGTT…
Gma.6653.1.S1_at	U32185.1	At4g17170	1e-100	Intracellular Traffic			GGATATGGTGGAATTCCTGGACCTTCTGGAGGTAGGGATGGCCCTTCTGCTTCGGCTGGAGGNTGCTGCAGTTGAAGAGAACCTATCNNAACCTATCTGCNTCAATGTAGTCCTTTATGTCTTCTCTTCTTTTATTTTGGGTTTGGATATG
Gma.6723.1.A1_at	BU544521	At5g06140	1e-10	Intracellular Traffic			GATGCGTGGAGAAGTTTGCTTCCCAAACTGGAAGCATGTTCCTCCTCGTAGAGAAAGAATTAATCAATGAGTTCTGCAGAGCATAGATAAATTACTCTTTCATGGCTGATTACAGGGGCTACTAGGGTATGGCAAACGCAGATCGCAGCTCGTGTTTTGTAAAAGAGCTTTCGGATTATGTTGTAAAAGATGTGTTTTTTTCTGTCTGGCCGATTTTGTACAAATTTTAAACAAAGTAAAAGGTTACCTATCCGCACTTTTATTTTTTATTTTGCTGCTGTTGNTGCGATATCTCTTGTCTTCCTCTGTTGTATATAGTCACAACGGAATTACATGACAATATGGAAGGCTTTTCTTTAGTCTTTTAGATGAGTCAGCA
Gma.7064.1.S1_at	BQ613120	At3g62560	4e-54	Intracellular Traffic			GTTGTTTATTTTTCACACCACTTGTGAAACTTCTCAAGAAAAAGAAAAAGGATGTTTCTTGTTGATTGGTTCTATGGAATTTTGGCGACCCTTGGCCTGTGGCAAAAGGAGGCGAAGATTTTGTTCCTAGGGTTAGATAATTCTGGGAAGACCACTTTGCTTCACATGCTCAAAGACGAGAGACTTGTTCAGCATCAACCTACTCAATATCCCACTTCGGAGGAGTTGAGTATTGGGAAGATAAAGTTTAAGGCTTTCGACTTGGGTGGTCACCAGATTGCTCGTAGGGTCTGGAAGGACTATTACGCTCAGGTGG
GmaAffx.1301.68.S1_s_at	BI974374	At5g10230	6e-57	Intracellular Traffic			GATGAGGTCAACTTGACCCTGGCAAAAACTGAGGCAAAATTGCTGCATGAGAAGATTTCAAACAAGGCTTATAATGATGACGACTTCATCAGGATTTTGGCCACAAGGAGCAGAGCACAGATTAATGCTACTTTGAATCACTACAAAGATGCATTTGGACAAGATATCAACAAGGACCTGAAGGCTGATCCAAAGGACGAGTTCCTGTCTTTACTAAGAGCAACTGTGAAGTGCTTGATCCGTCCCGAGAAGTACTTCGAGAAGGTTGTTCGCTTGGCGATCAACAAGCGAGGAACCGAT
GmaAffx.32631.1.S1_at	BE659866	At1g05785	2e-30	Intracellular Traffic			TTTCGCATTTCTTGGCATAATTCTTTTCTTTGACCGTGGTTTGCTTGCTCTGGGAAATATTTTTTCCTTGGCAGGGGTAGCCATTTTGCTTGGTTGGCGTTCCACGTGGGCACTCTTCACANATAGAGCAAACTTTAAGGGTTCTGCATCATTTCTNCTAGGTCTCTTTTTCATTTGTGTGAGGTGGCCAATTGTTGGTATAATACTTGAAATATACAGTTGTGTTTTTCTCTTCAGTGGATTNTGGTCATCTATCAANNNNTNNNNNNNNNATATCCCTGTTGTTGGATGGATTATACAGTTTATCTCTCCTCCTTGATTGTCACAGAAGGGATTTAACNGATNGCCTNNTAGTATATGGCTAATCATGGGTTTCGATTGTNTTGGTAATTTTTCCAA…
GmaAffx.59378.1.S1_at	BI425133	At1g08800	0.003	Intracellular Traffic			GATCAGCTACAACAATTACGCCAGATTGGGATAAGAGAATTAGATCAACCTGTTGCTTGAGGCTGTATATAAGATTCATACACTTATGATTGGATCCGCAACCAGGAGGAAGTTACCTTGTGCACTAGTGAACCAGGTTACCAAGGCTGGTTGCAACTGTACAGTAACATAGCTTGCTTTCATCCAGGATATAAGAAAATAGGATTTTAAATAATTTTTTTTTCTTTTTCTCCCCCTGCCTTTTTGTTCGGGGTTTCATTGAACGTTTTGCTGCATTGAGTTGACAAGGTTTTCATCTGCCCATTCAAATTTTCATTTTACAATAAAATTTTCCCTTTGCCGTTTTGCATTGTAA
GmaAffx.93059.1.S1_s_at	CF808784	At4g04910	1e-65	Intracellular Traffic			CACCATTGAGTGTCATCATTCTTGATGACATTGAGAGATTATTGGAGTATGTGCCCATTGGTTCTCGATTTTCAAACTTTATTTCTCAGACACTACTGGTGCTGCTTAAACGGCTTCCTCCAAAGGGGAAAAAACTCATGGTTATTGGCACAACAAGTGAACTAGATTTCTTGGAATCAATTGGATTTTGTGATACCTTCTCTGTTACTTACCATATTCCTACATTGAACACAAAGGATGCAAAGAAGGTCCTAGAACAATTGAACGTGTTTTCTGATGAAGATATTGATTCTGCTGCAGAGGCATTGAATGATATGCCTATCAGAAAGCTATACATGTTGATTGAGATGGCAGCGCAAGGGGAGCAAGGTGGATCTGCAGAAGCCATCTTTTCTGGCA…
GmaAffx.90036.1.S1_s_at	CF805761	At4g09160	8e-25	Intracellular Traffic			CAAGACCAAGCCCATCCCAGAGTAACTTGAAGCTCAAGAATAAGGATTTTACTGTTACTATTATATGTTCATCATTATTACAACCACAAGAACAAGAACATTGTGCTGTTCAACTTAATTCTTTCATACGGGGTGGGGTTCTTTTCTTCATTTGCTTTATAAAATTATTTTGTTTCAAGTCTGGCGTTGGCCTATTTCATTTAAGCTTACGGTAGTTTGCTATTTGGGT
GmaAffx.87721.1.S1_at	AW156448	At3g07880	1e-45	Intracellular Traffic			TTCACTCCATAGGAATTCTCTCTGAGGATTTTGGTGAAATTGTCACTCCTCTACCTGTGGATGAAAATCGCAATGGCTGTACTCTATTTACTCTCAGGGAGGGGTCTCGCTATCAGCTTAAGCTAAAATTTAGTGTTCTGCACAACATTGTGTCTGGCTTGACATACTCCAACACTGTGTGGAAAGGAGGGCTTCAAGTTGATCAGAGCAAAGGAATGTTGGGTGCTTTTGCTCCTCAAAAGGAGCCATATGTATACGCCTTGAAGGAGGACACCACTCCTTCCGGTGCACTTGCAANNNNNGTTTACTCAGCCAAACTTAAGTTTGAAGATGATGACAGAAGGTGTCACATGGAACTCAAATATTTATTCGAGATAAAAAAGAGAAGCTAGTCCGGTT…
GmaAffx.8642.1.S1_at	BU545035	At3g15290	1e-100	Metabolism			GGTAGTGATAACCTCCCATGATTATTCAGGCTTCATAGTGAATCGAATCCTTATGCCTATGATAAATGAAGCATTTTTTGCTCTCTACACTGGTGTTGCAACCAAAGAGGATATTGACACAGGAATGAAGCTGGGTACTAACCATCCAATGGGTCCTTTAGAGCTTGCAGACTTCATTGGATTGGATGTGTGCTTGTCAATAATGAGAGTTCTTCATGCTGGCCTTGGTGACAACAAATATGCACCTTGCCCTCTACTTGTGCAGTATGTTGATGCTGGAAGACTTGGAAGAAAACGAGGTATTGGTGTGTATGAATANNGTAAAGATCCAAGGTCTACAAAATCATCTTCCCGTCTCTAAAATGTTTGTTTCACTTGGAAGAACAAGTTTTCAACACC…
GmaAffx.84342.2.S1_at	CA802789	At4g13360	3e-57	Metabolism			AAACTGAGTATCGTATTGCCTTGAGGTCTTCACTACGACATGATTTTTCAGAAGGTGTCCGAGCAGTGCTGGTGGCCAAGGATCAGAACCCAAAATGGAAACCATCAAGCTTGGAGGAANTTGATCCGAGTGAAGTGGAAGCCGTCTTTAAACCTTTAGGACCNGAAGTTGGGGAGTTGAGAGTGTAATTTTNGANGGAAAATGTNNTNTTCTCATTTCTTCAAATGCATTANAGAATTGTAAGCACTGCATAAAATAAATAGATGGTGTTTTCATTAGGTCTGGCATCCAGTCCAGGTCCAGCGTGTNGCTAGCACTGTTCACCATATAATAACATGAGGTCCACGTTTTTGGAAAGGTCAAATGATCTTGTTGCTTCCATTATACCCATTTGGAAGA…
GmaAffx.90296.1.A1_s_at	CF806021	At5g23250	2e-29	Metabolism			GTTGACTGCCTTCAGAAGTTCCTAACTGATCCTCAAACAGAAGGTATCATTCTTATAGGAGAGATAGGAGGAACTGCCGAAGAGGATGCTGCTGCACTAATTAAGGAGAGTGGAACTGAGAAAGCCTGTTGTTGCTTTTATTGCTGGTTTAACTGCTCCNCCCTGGTCGTCGTATGGGTCATGCTGGAGCTATTGTGTCGGGTGGCAAGGGCACTGCACAAGACAAAATTAAAACCCTCAGGGAAGCTGGGGTCACAGTTGTGGAGTCCCCTGCCAAAATTGGAGCTGCCATGCTAGATGTTTTCAA
GmaAffx.92649.1.S1_at	CF808374	At2g23620	2e-80	Metabolism			TGGTCACAGCCTTGGAGGGCTGAACATAGCACTTGCAATGGAGAAATTCCCAGAAAAGGTAGCAGTTGGTGTTTTCTTAACAGCTTTTGCTCCAGACACTGAACACCACCCATCTTATGTCTTGGAAAAGTACAATGAGAGGACCCCGTTAGCTGCATGGTTAGACACTGAATTTGCTCCAAGCGGAAACAAAACATCAATGTTCTTCGGCCCCAACTTCTTGTCCGACAAGCTCTACCAACTGTCCCCTATTGAGGACTTGGAATTGGCCAAGACTTTAGCAAGG
GmaAffx.91821.1.S1_s_at	CF807546	At1g80360	1e-106	Metabolism			GGTATTCCTGAACTCAGAGCAGCATTAGTCAAAAAGTTGCGTGATGAAAATAATTTGCACAAATCTTCAGTAATGGTTACATCAGGTGCCAATCAGGCATTTGTGAATCTAGTTCTTACTCTCTGTGATCCGGGTGATTCNGTGGTTATGTTTGCTCCTTACTACTTCAATGCNTACATGTCCTTCCAGATGACTGGCNTTACCAATATTCTAGTTGGTCCTGGTAGCTCAGACACACTCCATCCTGATGCAGATTGGTTGGAAAGAATATTATCAGAAANTAAACCNNCTCCAAAGCTTGTTACTGTTGTAAATCCAGGCAATCCATCTGGAACTTACATTCCAGAGCCCCTTCTAAAGAGGATTTCAGATCTCTGCAAGAATGCTGGCTCTTGGCTT…
GmaAffx.92157.1.S1_at	CF807882	At1g23800	1e-108	Metabolism			GCTGGTGTTTTAAATGTAGTATCTGGCTTTGGTCCAACTGCTGGTGCTGCTCTTGCTAGCCACATGGAAGTTGACAAGCTTGCTTTTACTGGTTCCACTGATACTGGGAAAGTTGTCCTTGAACTGGCAGCTAAAAGCAATCTTAAGCCTGTTACTTTGGAACTTGGTGGGAAATCCCCCTTTATTGTGTGTGAAGATGCTGA
GmaAffx.93206.1.S1_x_at	CF808931	At1g78380	1e-65	Metabolism			TGCCTGCAGAAAGACAGTGTTGCCAAGTCTCTTCCTGATCAACACAAGGTCTATGAGTTCATTATGGACATA
GmaAffx.93267.1.S1_s_at	CF808992	At2g26230	4e-61	Metabolism			GCGTGGGCATCACTCTCTTCTCAGACTGCGTCAACTCGTATCTCCGCGATGACAACTCTGACATCGTTGCTACTGATACCATGAAAAACACAGTGTATGCAAAAGCAAAGGAATGCTCAGACATACTTTCTGCTGAGGACTTTGCTATTTTGCTTGCT
GmaAffx.93598.1.S1_at	CF809323	At1g01470	3e-59	Metabolism			ATCATCATCAATAATGGCGGAGTTGTTGGAAAAGGCCAAAAACTATGTTGCGGAGAAAGTCACCAACATGCCCAAGCCAGAGGCGAGTGTCACCGACGTGGACTTCAAGCGCGTGAGCCGCGACAGCGTCGAGTACTTGGCCAAGGTCTCCGTTCAGAACCCTTATTCCACTTCCATTCCCATTTGTGAGATCAAGTACTCCCTCAAAAGTGCTGGCAGGGAGATAGCAGCAGGAACAATACCTGACCCAGGGTCATTGAAGGCAAGTGACACAACAATGTTGGATGTGCCAGTGAAGGTGCCTCATAGCATATTACTGAGCTTGGCAAAGGACATTGGTGCAGATTGGGACATTGATTACCAATTGGATATTGGACTTGTTATTGACCTTCCTGTCAT…
GmaAffx.58580.1.A1_at	BE824464	At1g63180	5e-09	Metabolism			TTATCGTCTTTTTTAATGGTGCAGGGCAAAATACGGTATAGAGGAAATGTGCAGGGATTTGTGGAATTGGACAAGCAAAAATCCATGGGGATACCAGGGGAAGCATTAAATGAAATTGGGTTGTACTTGGAGGAGGTCTTCCTCCACCATATCATATCATCTCCACTCCAGATATAATATGTTGATGTTTCTTTTGTTGATACAATTGATTGATTGATTCTTTACACTACGTATGTTGTTGGCCTAAATAATTGTCTGATTA
GmaAffx.58465.1.S1_at	BU926190	At1g06290	0	Metabolism			AAACATTCATGGAGGCTGAGTCAACTGTACCTGCTGGTTCATTGAAGAATGTCTTGGGTCTATTGAGATCGTTGTATGCTGTGATATGT
GmaAffx.5528.1.S1_at	BE822015	At5g14200	3e-36	Metabolism			TGCTTCAACCGACATGCTTAACAACAGCACAATTACTCATNNACAGGACAAGGCAAATCCATTTGCCACTGTTCTTAGTGCTGCTATGCTTTTGAGATATGGCCTAGGAGAAGAAAAGGCAGCTGAAAGAATAGAGAATGCAGTGATGGACACTTTGAACAGGGGATTTCGAACTGGTGACATATATTCTGCTGGAACGAAGCTGGTAGGATGCAAACAGCTAGGTGAGGAGATACTGAAGTCAGTTGAATCTAACGTTCCTGCTGGTGCTGCTGCAGTGTGATTTTGAAACCAACTCGCCATAGCATTTTGGGTTCTGGTTTAGGTTGGAGGCCACTATGACTGCCAAAGCCGAGAAAGTCTCCCTAGTCTATTAAGTTCTGGCTTCCTTCTGTATCA…
GmaAffx.56300.1.S1_at	AW348930	At5g66690	3e-36	Metabolism			GCAGGCGGAGATTCTGGGACATCCAGCGACGGGTGGTTTCGTGACGCACTGTGGTTGGAATTCTGTTTTGGAGAGCGTTCTGAACTTTGTTCCCATGGTGGCGTGGCCGCTTTACGCGGAGCAGAAAATGAACGCGTTTATGCTGTCGGAGGAGCTTGGGGTGGCGGTGCGGGTGGCGGAGGAGGGAGGAGTTGTGAGAAGAGAACAGGTAGCGGAGCTGGTGAGAAGAGTGATGGTGGATGAAGAAGGTTTTGGTATGAGGAAGAAGGTTAAGGAGCTGAAAGTGAGTGGAGAGAAAGCGTTGTCTAAGGTTGGATCCTCTCATCATTGGCTTTGTCAAATGAGCAAGGACTGTGAAGCTCATGTGCAGGGTTCTGAGGCTAAAGTTTCTTCTGCTTA…
GmaAffx.62534.1.S1_at	BE022927	At1g47480	9e-07	Metabolism			GAATGGTGAGGATCATGTTTATCATATCTTCCATCCGGAATCTGAGAATGCCACGAAGTTGATCAAACGCTTGGGTTTGTTTCTGAATGAGTAGAATAAATGTCTTTGCTTGATTTCTCCTGTTGTGTTGTGTGAGAATATGAATAACAACAACCATGGAATGGTTCCTCTGTGATCTGAAAT
GmaAffx.60847.1.A1_at	BU550307	At5g38630	9e-75	Metabolism			AATCAGTTCATCTTGCGTTACAGTTTGCCGCTCTCATTTTGAGCTTGATTGGTGTCTGGGCTGCTTGGAAGTTTCACATTGACAAGGGCATTGACAATTTCTACAGCCTGCATTCATGGCTAGGCCTTGCATGCCTTTTCCTATTCACCATCCAGTGGGGTGCTGGCTTTGCAACATTTTGGTACCCAGGAGGGTCAAGAAATAGTAGAGCTGCCTTATTGCCATGGCATGTGTTCTTTGGTATCTATATCTATTGCTTGGCTATAGCCACAACTGCTACTGGTATTCTAGAAAAAGCTACATTCCTTCAGGTCAACAACATCATATCACGCTATTCCAATGAGGCACTTCTGGTCAATTCCTTAGGCATTCTGATAGTCATTTTAGGTGGCTTTGTGA…
GmaAffx.64716.1.S1_at	BE822506	At5g64460	1e-08	Metabolism			GGATCATTTTCCTACAACTGTTAAACATTGATGACCATTGACCAATCTAGCCAATCCTGGGTGATGTTCATCAGTTTATATTTTGAAGTAAATGATTGATTCGTTTCACATGTCCTTACAGCTTTGCTAATTGTGAACTTCGCTCCATGGTCATTGTGGATAGAGGGTGAGTTTGTGAAAATATACATAAAAAAAAAACAGGTTTCTTTTTATCTTAATCGAGATTTGTTTGTTTTTTCTCCAGTATGATAGGATTGGAACAATCAACCACTAACTATCCAGGCAAGATACCTTCAGGGCTGGACCTCCCTAGTGATGTTGCAGATGAGAAGTCTGAGAAATAATGGATTTGGCTTCTTCTACTTGTTTGTATGTGTTCAGGACCATTCAAGCATTGGT…
GmaAffx.79869.1.S1_at	BI702308	At2g26830	4e-50	Metabolism			TGCATCGTACAACTACAGAGGCTATGATATAGGAAACCACTTTGCAGAATATGCTGGCTTTGAATGTGACTATGACTTGTACCCAAATATGAATGAACAATATCATTTTCTCCGGCATTACTTGAAACCTGAAAGACCCCAAGAGGTTTCTGAGAAAGATCTTGAGACTTTGTATGTTGAGGCAAATACATTTTCCCTTGCTTCTCACGTTTTCTGGGCTCTGTGGGGTCTAATTCAGGCAAAGATGTCTCCAATTGAATTTGATTATCTTGGTTACTTTTTCCTTCGATACCACGAGTACAAAAGGCAGAAAGAGAAGTATTTCTTGTTGGCACGGTCCTACCTTTCAGGATGCAAGAATGAGTAGATAGATAGATTATGCTTACTCAGTCACTCGTG…
GmaAffx.81452.1.S1_at	BF596552	At1g44170	2e-10	Metabolism			ATTCACATTTGAAGCTTTTAGCCACAAAAAAGCAGTTCTATATCGCAGATTTATTGGTGATGCACCAGTAAGGTACCCACCATACACAAATACAAAGATGAGATTGCTGAAAGCTCTCATAGGTGGTGGCATACTTGGTATTATTCGCGCCCTGTTTGGTTGGTGATAGGCTTTAATTTTAATTATATTGGAATTGGAATCTTGATGCTATAGACGGCTTTTAATCTGGCTTCCTTGTATTTTAATCTCCAGTTAATTTTTTTATGTAATACTCATCAACCTTGACTTTTGGATG
GmaAffx.82560.1.S1_at	BE058939	At3g29200	4e-17	Metabolism			GAAGTCCAAGACTTATGGGCAAGAACTGGTTGTAACTACGAAGGAACATCGAACTGAACCTGTCTACAAAATAAATCCAAGCTTGGTTGCTGATCTATACAGTGATTGGATCATGCCANNGANAAAGGAAGTCCAAGTTTCTTATTTATTGAGAAGGTTGGATTGAACATAACAAAAAGTACCTTTTCAATTACAGTGTTCATAGGGTATTTATATTTTCTAGGAAATGATACTTGCAATGGGTAATTTCTCTTGAATCATGACTATAAACTTTAGTTTTTGTAATTAACATATGAGGAAGCTCATATTGGGTTCTTAT
GmaAffx.71432.1.S1_at	BQ742102	At2g42010	2e-80	Metabolism	Phospholipid Biosynthesis		GGGTCTGCAAACATCAACCAGCGCTCTATGGAAGGAACAAGGGACACCGAGATTGCAATGGGTGCGTACCAACCTCATCATACCTGGGCAAGAAGCCAGTATCATCCTCGTGGGCAAATCCATGGATATAGGATGTCACTTTGGGCTGAACATACGGGTACGATTGAAGACTGCTTCTTACAACCAGAGAGCCTTGAATGTGTTAGTAGGATTAGAACAATGGGTGAGCTGAACTGGAAGCAATTTGCATCAAATGATGTAACAGAAATGACAGGGCATCTGCTCAAGTACCCGGTAGAAGTCGATCGAAAGGGTAAGGTAAGATCCCTCCCGGGCCACGAAGAGTTTCCGGATGTGGGAGGAAAGATTGTAGGATCATTCATTGCCATTCAGGAGAAT…
GmaAffx.713.1.S1_at	BI968242	At5g19290	2e-62	Metabolism			AGCTGCTTCGGATCTGCCGGGAGCTTCAGGGGAGGTACGAGGAGGTGGAGGTGCCGCTGCTGGTGGCGCACGGCGGCGACGACGTGGTGTGCGACCCCGCGTGCGTGGAGGAGTTGCACGCACGCGCCGCGAGTAAGGATAAGACGCTGAAGATATATCCCNGGATGTGGCATCAGATGGTTGGGGAACCCGAAGAGAACGTGGAGCTAGTGTTTGGGGACATGTTGGAGTGGCTTCGTACACGCGCTCAACGCGCCCCCGAGCACGGTGTTGCTTAGGGTCAACTCTTTTACTTTATATTATAATAATAATAATAATAATAATATTATAATAGTGTTGGTTGGGCCAGGTTGGCTTGTGCTCTGATAAGATATTATTGTTTATTCCTATAAATTGTTA…
GmaAffx.31256.1.S1_at	BF009765	At1g63660	8e-51	Metabolism	Purine Base Biosynthesis		TCTCGATTACGGTTCCCAATACACCCACCTCATCACTCGCCGCATCCGCAGCCTCTCGGTGTTCTCCCTATGCATCTCCGGCACCTCCTCTCTTTCAACCATCACCGACCTCAACCCCTCCGTCGTCATTCTCTCCGGGGGCCCCCACTCCGTCCACACCCCGGACTCCCCCTCCTTCCCCGACGGCTTCCTCCAGTGGGCCCATTCCAATGGCGTCACCGTCCTCGGCATCTGCTACGGCCTCCAGCTCCTCGTTCAGCGCCTCGGCGGCGACGTCCGCGTCGGAGACAAGCAGGAGTATGGCCGCATGGAAATCTGCGCTGACAAACCCTC
GmaAffx.25648.1.S1_at	AW568402	At1g22340	2e-57	Metabolism			TCTTTGCGGAGCAACCGACTAATTGTCGATTCTGTTGCAAGGAATGGGGTGTTGGGATGCAGATAGAAGGTGATGTTACGAGGGATAGAGTTGAGAGGCTTGTGAGGGAGTTGATGGAGGGGCAGAAGGGGAAAGAGTTGACCATGAAAGCCTTGGAATGGAAGAAACTGGCAGAAGATGCCACCATTCTCAAAGAGGGCTCTTCATTTCTTAATTATGATAATATGGTTCGTCAAGTTCTTTTGAGTGACAACTTGAAATCAACTTAAACAAGTTCAGTATGGACTTTGGATTTCATGTGTAGTGTCATATCTCTCAGCTCCTTTGAAAGATGCAAAGCGAGCTAATACAAGTCTAGTCTAATATTTGTGACCACATATATGAGTAGTCTGTGTGTCT…
GmaAffx.26275.1.S1_at	BU547220	At4g34200	1e-96	Metabolism			AACTTGGTTAATGCTGATTTCACTGCNAAGCAAAGAGGGATCAGGATAACTGAGGAGANGGTTATTCTTGATGGTTCACCTGAGAATCCACTNGAATTCNTTCAGGTNCAGATTGCTAATGTGGAATCNCGATTTGCTAGTGCNATATCAGATTCTGGGGAGATTAAAGTTGAGGGTCGGGTNAAAGATGNNATCCCCCATCTNACAAAGGTTGGGTCTTTTGATGTTGATGTNAGTTTGGAAGGTAGNATCATACTGTGTAGGCANGTAGATCAACCAGGCATGATNGGAAAGGTTGGGAGCGTTTTGGGNGAGGAGAACGTGAATGTNAGNTTCATGAGNGTNGGAAGNATNGCTCCACGCAAGCAAGCTGTTATGGCAATTGGAGTGGACGAACAA…
GmaAffx.37797.1.S1_at	BU549753	At1g71920	5e-34	Metabolism	Amino Acid Biosynthesis/Metabolism	Histidine Biosynthesis	ATTGATTATCCCCTAGTACATTATGGTTATTGAAAGTTGTTGTAAGAGTTTGATATAACAGAATTTGGGTCAAGCACTGTGATAAATATACGTATATTGGGAGCAATTACAGGATATTCAAAATACTTAAGTACCCTTGCATGTTTACACATTTATTACATGCTATTATTCTCAACNCANNTGNANNNTNNNNNNNTNNTNNNNANNTANAGAATGTAAAAAATGCTTTGTTGAAAGAAAGAGGGAGACTTTATGACCTTTTGAAAGAAGTTCCATTCCTCCGGCCATTTCCAAGCCATTCTAACTTCATTCTTTGTGAGGTTACATCAGGAAAGGATGCAAAGAAGCTAAAGGAGGACCTAGCACAAATGGGTGTGATGATTCGTCACTATGACAAGA…
GmaAffx.38388.1.S1_at	CA852972	At1g69640	0.005	Metabolism			TGCTACCTATTACCATTTGATTTTCACCCTTGTATTGCTTGCTGCTACACTCAATAGTCATACCTGGTATCCA
GmaAffx.38388.1.S1_s_at	CA852972	At1g69640	0.005	Metabolism			GGTTTTGAAACTAGACCTTGCAAAGATTACAAGGATGATTAACTTTTTTGCTTGATGAGCATTCTTTATCTGTACTAGTATTGTTTTCCCTTGTTATGAGCAGCTTCTCCTTTCTCTTGTGATGCCTGTATATATACATTTGATGTGTCCTGTTCGATATTTTTGTTTCCCTTATGTCCATACTAGATAGACATAATAAAGGAAATTGAGGTGCTACCTATTACCA
GmaAffx.39202.1.S1_at	AW395777	At5g59420	3e-55	Metabolism			ATTTCAGTATACACATTTTGCTCATAAAATAAACAGCTTTGACACTGCCCCTANAAAGTTGTTGGCNTCAGATTCTCGNCTACGCCCAGATAGATATGCACTCGAGATGGGCGATCTGTCAAAATCTGGGNCAGAAAAGAGCAGTTTGGAGGANAGGCAGCGTGCTGAAAAGAGAAGCCGAGAGGAGAAAGGGCATAGCTTCACACCAAGATGGTTTGATTTAACTGAAGAAGTGACANCAACTCCTTGGGGTGATTTGGAAATCTATCAATATAATGGTAAATACANTGAACATCGNGCTGCTGCAGATAACTCNGGAAGCATTGATGATGTTGATGNTAAATCAATTGAATTTAATCCATGGCAGTATGGTAATTTGGTCACGGAATGAACTAGTTT…
GmaAffx.4537.1.S1_at	BU550013	At1g28480	8e-27	Metabolism			GAGCCATGTGGTAAAGCACTTGCTTCTTGGTCTTGGTGTTAACCCTGCGGTTTATGAGGTGGAGGAGAAAGATGAAGAGGGTGTTGCCAAGCAGNTGGAAGAAACAGTTCGTAGTGATGNNGGNACANCACAACAGGGGAAGGTGCAGTTTCCTGCGGTTTTTATAGGGGGGAAGTTGTTTGGAGGATTGGATAGGATCATGGCTACTCATATCTNNNNNNNGTTGGTTCCTATCCTCAAAAAAGCTGGGGCTTTATGGCTATGATGTCTTCATCTTCCCTTTTTTTTTTTNAATGTACAATAGTTATGCTGAGGTTCAAAACCTATGAACTCGTTCATACTACTTCAATCTCTTGTCACTAGGTCGACTNTGATTTTCTCTTATAAGTCTTTAGTTTT…
GmaAffx.4650.1.S1_s_at	BF219531	At1g11930	9e-48	Metabolism			TGTTGAACCAGCTCTGTGTGTGGATCTTGTAAAACATATTACAAACTGCCCAAACCTTGAGTTCTCTGGCCTAATGACAATTGGCATGCTTGATTATTCATCCACCCCAGAAAATTTTGAGACACTATCCAATTGCAGAAGTGAAGTTTGTAAAGCTCTTGGAATATCAGAAACGCAGTGTGAGCTGTCCATGGGCATGACTGGAGACTTTGAACAAGCTATTGAGATGGGAAGTACAAATGTTAGGATTGGAACTGCCATATTTGGAGCCAGAGAATATCCACCGAAAGAAGAGTAGCTATCCTCATTTTGCAGTCTTGTTTGCGTCGGTATATTGGTGCTTGGATTC
GmaAffx.12706.1.A1_at	BE657524	At2g04350	5e-11	Metabolism			GCCTAGTCACTGCTGCTCTCAAACTCAAGAGAGAGGCCATAAAAAAGACTTTTGATGAAGAACTTTCTGAGTTGTATGCTTCATAGGCTTAGGACACTAGTTAATCTTTTTACACCTTTTTCCCATTTGCATATAGCAGGGGTTGAGGTGAGGAGAGGTTTTTGAATTTTTTTGTTGCTAATCATTTTTTTTTTTCATTTGAAGTTTATCATGCACAGTGAGGCTTGTTACGTGCAGAAGGCCAACATGTTGAATTTACTTTAGTGACA
GmaAffx.19618.1.A1_at	BU544352	At1g43670	2e-79	Metabolism			TGGTTTTACACTTGATCCTAGCCTTGGGGAGTTCATATTGACTCACCCAAACATCAAGATACCAAGTAAAGGAAAGATTTATTCGGTGAATGAAGGAAATGCCAGAAACTGGGATGAACCAACCACTAAATATGTACAAATGTGCAAGTTTCCTCAGGATGGTTCACCACCAAAGTCTCTTAGGTACATAGGAAGTATGGTTGCTGATATCCATCGAACTTTGCTTTATGGTGGTATCTTCATGTACCCAGCTGATGCAAAGAGTCCAAACGGAAAGCTACGGCTTCTCTATGAAGTCTTTCCAATGTCATACTTGATGGAGCAAGCAGGAGGTCAGGCTTTCACAGGAAAACAACGGGCTCTTGATTTGATTCCAAAAAAAATACATGAACGATCACC…
GmaAffx.18415.1.S1_at	BI426447	At4g02130	2e-41	Metabolism	Carbohydrate Biosynthesis/Metabolism		CATTGGTCTGGTAGTGGGAAGCCATGGATCCGTTTAAGTTCCAAACGCCCCTGTCCTCTGGATTCTCTATGGGCTCCCTTTGATTTGTATGCACACTCTTCCTCTTAAACTAATTCTTCCCTCTCATTTAATTCAATTTCTCTTTGCTTGTCATTTTTCGCTAGTTAGAT
GmaAffx.24227.1.S1_at	BQ298345	At3g14680	5e-81	Metabolism	Cytochrome P450	CYP72A	GATAGTGTTATCATTGCTTCTGCAACATTTCTCATTTGAGCTTTCTCCGGTCTATGAACATGCTCCAACGGTTGTGCTTAGTTTGCAGCCAAAACGTGGGGCACACATCGTTTTGCATAAACTATGATATGATTCATATATTGGAATTAGTCATCGGCTTGCGGGATAAGGCTACGCATATCTCACTTGGTTTAGTGTGTTATACATTATATTTCCTTTATATAGTATCAATCATGTACTTGTGTGTGGAATGAAAACTATCTTTAATTAAGGATCTTGCAAGTTGTAANGCAGGTGTATTTGAATATNTAGTATATGGTATATTGAAAACTATCTTTTGAGTTTGGTCACTGGTTACGGAGGAAT
GmaAffx.20976.1.S1_at	AW307291	At3g44190	0.0002	Metabolism			ATGGGACTCAATCCAGATATTGTACAAGCTTGACTAGATATCGTGCATGGTGTGTATATAAATTACAAAACCGATCTGTTTCATTGTTTGTGTGGTTTATTGCAGTATTTTCAATTGATTCCTATAAAGAACACATATGTACTATATGTAAAATATCCTTATGCTTAAGTGGTGTTTCTAGAAATCATGAAATGGAATTGTGAGTTAGAAGCAGGATGCTG
Gma.9908.1.S1_at	CD399899	At1g63940	1e-130	Metabolism			GCAACATCAGTGGAGGAGGCCCTAGAGATTGCTCGGGAATCCTTGCAAGGCGAAGCTGCTGTCTAGTACCGATCTTGGTAACATCATTCTGTAATTTATCTTCTCTTACGGCCAGATTATCAGTGACTATCTGTCATCATCTGAGTAGGGATTGCTCCTTAAGAGAATAATTTTCATTACATTCTCAGTCACCTGACATTAGTAATGGTTTTTAACTGGAATGTCTNNAATTTGGATTTGATCTGGTGCCATAAGGTATCCTTGAATTTTCTCAATAATTTAAGATAGCCTTTGCCTTTNNANNNNANNNNNATTTTCCAGCAATGTGATTTTTGTTCTTAACTTACTACCTACAACCCTTCTTCTGAAGGGACTCCTGTAGGGAATTCTGTCTGC
Gma.9286.1.S1_s_at	CA803163	At3g62660	7e-10	Metabolism	Carbohydrate Biosynthesis/Metabolism		GGACACGCTCACTGATTAGCCTTTGCCTTCTCCCTGCTCGCCGGTAAATTCCCTTCTCTGTCACTTCTGTTCATTTAATTTAATTCTCATTCCGCCCAATTTTTATTTTTTCTTATTATTTTCTTCCCTCTTCTCTTCTCTTTACTATCAACAGACAGATCAGATATTTTACTTCACCCATTTTTATTAGTCTTCGTTACCCAGGCCATTTGTATTCTACAGTATCTTCTATTTTGTGCTTCGTGC
Gma.9288.1.S1_at	BG155460	At2g15490	4e-68	Metabolism			GTCAAAGACATTGCAGAGAAAGCTAAAAGAGCCGTGGAAGAAGGTGGAACATCTTACGCTGATGCTGAGGCGTTGATTGAGGAGCTTAAAGCTCGCAGATTGGCNAGACAAGATTAGATTTTTACATAATANNNGNNNGAATTCAGTTNCTAAAGTACGCATAAAAACACAAGAAAAGAAGCTTGTTACTTTCCTGCACCACTTGAAAGTTCTAAATTGCAGTCAGCAACCACAATTTTGGTCGCAATATTGTTGTTGCGGNACCGTCTACCGTANNNNCCCACAATTGCAATGCGAATTTCAATCCCATGAAATACTCAACGTAGCCGAAACAGAATATCAGTATTGCTCTACACTTCTATTCCACTCTTTTTTTTTTGTTTGTTTGTTAAAAGACAA…
Gma.9110.1.S1_at	BE658682	At5g09650	1e-106	Metabolism			GTGAGGTTCTCAAGGTCAAACCCTTGGGTGCATTAGCCATGATTGATGAAGGAGAACTTGATTGGAAAATAGTTGCAATTTCATTAGATGATCCGAAGGCGCCATTTGTAAATGATGTTGATGATGTTGAGAAGCATTTTCCAGGAACTCTAACTGCAATTAGGGACTGGTTTAGAGACTACAAGATACCTGATGGAAAACCTGCTAATAAATTTGGACTTGGCAACAAGGCAGCAAATAAGGATTATGCGCTTAAGGTCATCACAGAGACCAATGNAGNCNNNGNANTAAACTTATCAAGAGATCAATTCCTGCAGGAGAGTTGTCACTTGTGTAGAGATGTATTGGGGGAATGTCTATTGTTCATGCCATTGCTTGCATTTTCTACAATTCTATTTA…
Gma.8489.1.S1_at	AB030493.1	At5g54770	1e-127	Metabolism			TAGTGTGCCAGGGATGAAAGCCCTTGACATGAACAAGGCAGAGGATGCCATTGTGAAGCTCACTAGGGAGGTTGTGCCTGGCATGATTGTTACTGGGATGGAAGTTGCTGAGATTGATGGTGCTCCAAGGATGGGTCCAACATTTGGAGCAATGATGATTTCAGGGCAGAAAGCAGCCCATCTGGCTTTGAGATCATTGGGACTTCCCAATGCTTTGGATTCTGTAGGAAACGTTCATCCTGAGCTTGTCCTAGCTGCTGCTGAATCTGCTGAAATTGCAGACGCTTAATTAATGTTGCAACAAATTTAAGTTAAAATATCAGTGCTTGCAACTAGAAATAATACTTGTAGTTAGGGAATTAAGCTTTGAAGGTGTTGGTAGTGATCTATTGGGGTGGT…
Gma.8147.1.S1_at	BG507825	At4g17770	2e-22	Metabolism	Trehalose Biosynthesis		AGCTCTTCCCACCATACCAAAAGTGTTTGCTTGCACTGTTGGANNNAAACCAAGTATGGCTGAATACTATTTGGATGATACTAGCGAAGTAATGAAGTTACTTGAAGGACTTGCAACCGCTTCAGCACCATCTGCGTCCATAGCTTCTCAGGAATTGTGAGGAACATTATAGAAACTGACACAGAAAAACAATCTTGTACAGAATGATACTTTCATAGCTGGATTTTAAAAGGTCTATATTTAGAAATTTACAGATTAGCTGATTCATGTTCNNNANAACTTGCAGTAAAAAAATTCTTTTTTTTTTTATGACAAGGATTATGACTTTCTGCACCGTTCAATGAAAACATGCGTAACAGCAATCTTTCAACAAT
Gma.8220.1.S1_at	BE821328	At5g40850	5e-64	Metabolism			GTAAGCACGCTATCTGATGTTTATGGAAATGTAGAACTTCTGCCCTGCTTTTGGGCTATCTATTGGAGTGTTTGGCATGGGCAGAGCTGTTTCAGAACCAATTTTGATTTTCCATGTTCCAGATTGGGAATAAAACAAAGTAATACACAGATTTACTCATTTTTATAAANAAAAACACAGGTTTCGACTGCCGCAGTTATCTAAGTCAGGTAACTTGTTCCTTAGCCATTGGAGAAAATTTGTTCCATATGCTATTTAGCATCTTTCTTTCAGGAAGAAATATGGAGATGAGTGTCATGTCTGTGATTTCACGTGTTCAATTTATCAATGTTGCTATTCAGAGCCATTGATTCTATTTTTCATTCATGTTTTCTTGTAACTTGATGTTAGAGATACTGC…
Gma.7008.1.S1_at	AW349709	At2g47420	1e-130	Metabolism			AAGGTGGATTCCTCTGTGGTGCGAATTGAGCCCAGGAAACCCCGTATTGAAGTTAAGCAAAAGGAGTGGGATGGGTTTTNNCGGATTTGTTTTAACAGGAAGAACAAAACACTTGGTTCGATATTTANGCAGAAGAGTGTGATCTCCTTGCTTGAAAAAAACTATAGGACTGTGCGGGCACTGGAACTTGGGCAAGAAGATTCACTAAAGGAAGTGGATGCTAAAATGGACTTCTCTAGTTTTGGTGATGATCGAGGTATGGAGATGGATGATNNNGGAGCAGATGATGATGAAATGGAAGTTGAGGATGGGGAAGCAGATGAGGTGCAATCTGAATTCAAGGACAAGGTTTTGGGTGTTCTGAAAGAGGGAGATTTTGAAGAGAAGAGGTCATCCAAG…
Gma.7037.1.S1_at	BI969665	At5g20060	1e-98	Metabolism	Lipid Biosynthesis/Metabolism		GGCTTCCGTGCTCAAAGACCTTGAGTAACAAGTTACAAGGGGTAGATGAAGCTACAAGGCGTGCTCAGTCCTTTCCTGTTTTGCTGTGTCATGGAAAAGTTGACGATGTTGTTCCTTATAAGTTNGGTGAGAAATCATCAAAGTGCTTAAGTNCAACTGGATTNCNGGATGTAACTTTTAAAGCTTATAACGGGCTTGGNCACTACACCATTCCAGAAGAGATGGATGAGGTTTGNGCNTTGGCTAACATCAAAATTGGGCCTTGAGGGGAACATTGCTTAGTTAGCAAGCAAAATGTGAAAAATAATTCTTTTCGTTTTTNGTCCATTGTAATTTTATGTTATTGCAGATTTGNTTAGATTTCNGNNNNTGATATGCATAATATATCCGCTACGCATT…
Gma.7286.1.S1_at	AW310642	At3g06860	1e-165	Metabolism			CAAAGCAGCAGATCTTGATATTTCTGCTATCATGGGCATGGGTTTTCCCCCTTACAGGGGAGGCATCATATTCTGGGCTGATTCTCTTGGATCCAAGTACATATATTCAAGATTNGAGAAATGGTCAGAGTTGTATGGGGAATTCTTCAAGCCTTGTGCCNACTTGGCTGCAAGAGCTGCCAAAGGAATTCCTCTGAGTGCCTCTNTGGAGCAGNNGGNAANGTCTCGCATGTAAGAAAAAAANAGCTCATTACGTGTTTACTGGATTGAATTTTCCTTTCCCCGTTATATCTCCTTTCAGATGGTAGGAANATANTGGTGACTNNNNTGAGAAATAGCNTTATAATGTACGATGAGAAAACATTTGAACAGCATAATTATTTAAAAAATAAAAGTATT…
Gma.7492.1.S1_at	AW597705	At3g22200	1e-130	Metabolism			ACAACAAGTCACCTAATGATCCATTTCCTCCTGAATGGGGAATAGGTGCCTATTTTGGAGCACAATGTGAGAAGCATGGGATGTTAGTTCGTGTTGCGGGAGATAACATCATGATGTCTCCACCATATATTATATCTCCTGGAGAAGTTGAAGAGTTAATCAGCATTTATGGGAAAGCTTTGAAAGAAACGGAAAAGAAGGTACAGGANCTCAAGTCTCAGCGCAAGTAGCTTAGGCCTNATGATGGAATAATAAACTNTGCTGCNNCNACNTCCGGGNGAAAAGGAAATATTNNNNGTANTAACTTGATAANACTTNGTTCCAACCTTTTCGTTATTGTAAATGTCNNTAAATTGNTTNCCTANTTGCNTCCTAATTNTATGTTGTNGTTANANANAN…
Gma.7812.1.S1_at	AI443507	At4g34740	3e-11	Metabolism	Purine Base Biosynthesis		CAATAATCCTCTATTTCTATTTCTGGTTTTTGCAGCATAAGGCATCTCTCAGTGGACAAAAATCAGATGCAGTTCTTCAGGTGTTTTTGGTGTTGTTCTTCATTTCAATTGAAGTTTTACCTTGATGATTCGCACAATAATATTGTTTTACATTATAGGTCAATATAAATTCTCGAAGTAAAACTCTAATTCTGACTCAAGAAAGTACTAGAAGTACTTAAGAAACTGTATCTAAATCTTGTCCCATTTGATAGTTTAAGCCTAACCGTACTACTACCTATGTTGTGATGTGATGATGTGATGCGGGGAGGGGAAATACTGTCAAAGCATCCAGCTCCACTGGTGAGCTTCATTGGTTCATTTGGATTCTGAAGGCCGGTGATGCTTTTGTCATCTGAT…
Gma.6730.1.S1_at	BE211440	At2g36800	2e-72	Metabolism			AATGCTAGAAGCCTTCTCATTCGGGGATGGGNCGCCNTCAAATATTAATATTATCTCACCCTGCTATTGGAGGGTTTATAACACACTGTGGTTGGAACTCTACCTTAGAAGCAATATGTGCCGGGGTGCCAATGCTTACGTGGCCACTATTTGCGGATCAGTTTTTGAATGAAAGCCTAGTGGTGCATGTACTAAAAGTTGGAGTGAAGGTTGGGGTGGAAATTCCGCTTACATGGGGTAAGGAAGTGGAAATTGGTGTGCAAGTGAAGAA
Gma.6752.1.S1_at	BU544731	At1g03090	0	Metabolism			GCATATTCATATTTGGCAAGGGTCCTGTCATCATTATTTCAGAGAGAAACTAGGCCTGNAGCTGTCTGAGGATGAAGAATCCCAACATAAACCCAAAGTTGAAACATCAGCCAANCCTCAAGGGACAGTTGTAGCACCCATGGCAGGCTTGGTAGTTAAGGTTCTAGTGGAGAACAAGACAAGAGTGGAGGAAGGACAACCTGTGTTAGTATTNGAAGCAATGAAGATGGAGCATGTTGTAAAGGCACCTTCNTCTGGCTATGTGCATGGGCTTCAACTTNNGGTGGGTGAACAGGTTTCAGATGGCAGTGTTCTTTTCAGTGTAAAGGATCAATAAAATCNCACTTGNNNNACNGCTTTNCGCCAAGACTTTGNCAAGGGGGACATTATCTGGANNNN…
Gma.6602.1.S1_at	CD415212	At3g02780	1e-121	Metabolism			CACAAGTTGACATAAGTAAGTTCAGAGGAGCTTCCTGCATC
Gma.6551.1.S1_s_at	BM527540	At4g20870	9e-24	Metabolism			CAAAGTCTGATGTGCCCAAAAGTCTNAAGAAATATCACTTNAATCATCATTATCGGCTCCAGAACTATGGCTTTGGGATCACNTCACCNCTGTGGGATAAAGTTTTTGGAACGGTTCCTCCTCCTCAATCAAANGGGGATGCCAAACGTAGATAAGTTACTGTCAAGGTTGCATTTGTTCATTGGTTAAGNATAGTTCATTCAGGAGCTTCANACGAGATNTGTTGATAATTNCATTATTCATGTCTTGNTTGTCTAATTATTTTGCTCCNCAATTGATGTTTCTGAGGGTTAACGTGCCACCATCTTGTGTCAAA
Gma.6558.1.S1_at	BU084402	At1g36160	8e-58	Metabolism	Fatty Acid Biosynthesis		CTTGGTTAGAGGACCCTGTTTGTGTCTTTTAAATGTAACGCAATTATTTGTGTTGATTCCATTGGCTAAGTTGTTATCCCCAAGGGAAAGGAGGCNGTTGCATCCCTCATTGCTGAAGGGATCCGTTGCTTCAGAGTGTAAATGAAATGAGTCCTGGATGGTAATTAATTTATGCAGTTAGGGGATCACAACCAGCATCACCATGTTCCATCTATTTATTTGCTGGTTGATTGATTCTTTTCGTATANTTGAANAAAATNNNAANNNNNNGNAACATTGTTTTTAATGCATAACGATTTTGGGTAGTCA
Gma.6280.1.S1_at	AI988271	At3g04940	4e-41	Metabolism			GCTGGAAGATTCCTCAGGGAGAAAAACCCNGATATNAAGCTGTATGGTGTGGAGCCAGCNGAAAGTNCAGTTTTGAATGGAGGACAGCCAGGTAAGCANCTGATNCAAGGAATTGGTGCTGGTATCATTCCCAAAGTTCTGGATGTAAATCTCCTAGATGAAGTTATTCAGGTTTCAAGTGAAGAGGCTATAGAAACTGCTAANCTGCTTGCCTTGAAAGAAGGTTTGCTGATGGGAATTTCATCAGGAGCTGCTGCAGCAGCNGCAATAAAGGTGGGGAAGAGACCAGAAAATGCAGGAAAGCTCATTGTTGTGATTTTCCCCAGTTTTGGAGAACGTTACTTATCTTCACCACTGTTTGAATCCATTAGGAAAGAAGCTGAACA
Gma.6281.1.S1_at	BE658173	At5g42650	6e-87	Metabolism	Cytochrome P450	CYP74A	AGAACGCCGAGGACTTTGTGGCCCACAGGTTCCTTGGCCACGACGGGGAAAAGCTCTTGAGACACGTCTTGTGGTCCAACGGACCCCAGACGGAGGAGCCCACACCGGATGATAAACAGTGTCCCGCCAAGAATCTGGTGGTGCTCATGTGCAGGCTCTACTTGGTGGAATTCTTCCTGCGTTACGACACGTTTACGTTCGATTTTAAACCAGTTGTTCTGGGTCCCGATGTTACCATCAAGTCACTCGCCAAGGCTTCTTCCTTCTGATCCTCCTCATCACCTACTCTACCTCAAACTTAAAATCAATCTTCTTTTTAATGTGTATTAGTTAATTAATAATTAAATAAAACAAAGTAAATATATATATTAAAAGTAGGATGTGCACTGGACAGCACAG…
Gma.5790.1.S1_x_at	BU549012	At5g23670	0	Metabolism			GATCCATATAATTGTTCTCAGATTCAAGTGAACGTCTCTTGGAGGGAAGTCTGTTCTTATTTTGCCCAGTCATTAGATAANTATGTATAGGTGGAGTTTGGTTATTCATTTGAAACTTACTTTTGCTTGGAATTTTAATCAAGTAAAATTGATGATGATACATTGGGTTGTAATTTTGAATGCGAGCAGTCCNTTGNAAAGTGTATAGGCCACTTTAGCAATGTTTTTTTTNNACAATAGGCTGTCTACTTGAATTGTCATGTGGGCATGGGTTTC
Gma.574.2.S1_at	CD486754	At5g26780	0	Metabolism	Amino Acid Biosynthesis/Metabolism		AGTGAAAGGCGACAGATGGAACTTCTTCTGGAGTATTATTTGGAAGCTTTTGGAATTAATAACAACACGTTGCTCAATGGATAGTACCGGAGTCTTGGATGAAAATGAGAATGATATTATCAATGGTTTAAATGAAAGAGAAAAGGGAGAAATTTCCCTTCAGCTTTTCAAATATATTATTNGATTTCATNGGTGAAAATTCCTTGTGATCGTACTGCTGATGTAGCAAAAAGGAGGTCGAGCATGTGGATTTTGCTATNTTGGTGAATTTGTACTAGTATTNTGAAATAAATTACCTTAATTCCTCCTCAATTTACAAACCCCATCTCTCTA
Gma.5150.4.S1_a_at	BM887549	At1g64440	9e-35	Metabolism	Galactose Metabolism		GAAGAGTTCCCTCTGTCAGCAATGAACCCATATGGACGAACTAAGCTTATCATTGAAGAAATTTGTCGTGATGTCCACCGTGCAGAGCCAGATTGGAAAATAATATTGTTTTTATACTTCAACCCAGTCGGTGCACACCGTAGTCCGTAGGTCTTGTGAATTTAGTTT
Gma.5536.1.S1_s_at	BU550770	At5g40650	1e-128	Metabolism			CGTGATGAGTACACTAAGGAGAGATTGGATGCCATTAATGATGAATTCAAGCTCTATCGCTGCCACACCATATTGAACTGTGCTCGAGCCTGCCCAAAGGGGTTAAACCCAGGAAAGCAAATCTCACATATCAAGTCACTTCAGCCTAAAGCATAAAATCCTATTGTTAGAGGCATGATGATGTTTGCATTTGATC
Gma.5578.3.S1_at	AW310572	At2g40890	9e-24	Metabolism	Cytochrome P450	CYP98A	GAAAATTGCCTTGTGTCTATGTAACTACATTTGAAATGGCAATTCAAGGAACTAAGGAAAAACCCATAGCGAGTTTGGCTTCTCCTCTTCAGATTTTGGATTGAAATTCCTGTTTAAGATTAATT
Gma.5093.1.S1_at	AF244518.1	At1g74960	0	Metabolism	Fatty Acid Biosynthesis		GGGTCACAATTCTTCAATCATATTTNGCACCATACTAGTGAAACAGATTTCAGAGCAGTACTTTCTTATTATTATAAGTTACTGAGTACCCAGACAATGTTTATTGCATACTAACTCCAGTGTTTTGGTTGGTTGAGAATATATGCGGTGTGGATTAGTTGGTTGGATCAGTAACTGTTGAGAAACATTGTTTTTTGGGATGGGGTTGGTTGTGTGCCTACNGAATCAGAGTGTTGATAGATTATCATTATCTGGTGCTCCTGGTGGGAGAGAGTGAGTCGCTATCTATCCACTACCATNAAATCCTATCTTTACCATGAATGGNCTAGAGTAGGNAGTTGACCCACTTTTGATGTAACCGTTTAACAACCATTTTGATGGGATGGATACAGTCTTTTG…
Gma.5113.1.S1_s_at	BI971033	At5g06060	1e-100	Metabolism			AAACCTGGCTTGTGAATGGGCCAAAGACAACATAAGGAGCAACTGTGTTGTACCATGGGCAACCAGAACCCCACTTGTAGAACATTTGTTGAGAGACCAAAAGTTTGTGGATGATATTATGTCTCGAACTCCGATTAAACGTATAGCAGAACCCGAAGAAGTGTCATCGTTGGTGACTTTCCTTTGCTTGCCTGCTGCTTCTTACATCACTGGACAGGTTATTTGTGTTGATGGAGGATTAACGGTGAATGGATTTCAACCCAGCATGAGAATTACCTGAAATTACTTTCCTTCCATCTTTGTGGGAGTAGAACAACGATTCTCATTTGATTTCAACATGTGTGTGACAAGCCATGTCAATTTCGTTTTTTCTCCCTTCTAGTTGCATATGAAAA
Gma.483.1.S1_at	BU083513	At2g16370	0	Metabolism			GCATCTTATGCCCTTTTGACATGCATGATTGCTCATGTTTGTGATCTCATTCCNGGTGATTTTATNCATGTTATTGGGGATGCNCATNTTTACNGCAATCANGTGAGGCCTTTGCAGGAGCAGCTCCATAACCAGCCAAANCCTTTTCCAACTTTGNAGATAAATCCAAANAAGAAAGATATAGATTCTTTTGTGGCTGCTGATTTCAAGCTCATAGGCTATGATCCTCACCAGAAGATTGATATGAAGCTGTCTGTCTAAAATCTGGGGATTCTCACTCCTTCAGGTTGTTTCTGCTTTTTGAAATGAGGCACAACCTTAGGAAGATTATGTTAAATCTGTGTACAATTAAAGAACATATCGTAGCACATACTTCATCGCATAAATACTGTTACTTAA…
Gma.4831.2.S1_at	CA852180	At1g72880	6e-24	Metabolism			TACTTTAGACTAGAGTTTTCGGACAATCAGCAGGAGGAAGAANTAGACGAAGATCTGGATTACAGANCACTTGAAAGTGGATATGTNGCAGTGACTCCGCTGTCTNTTTCTCCTCATATTGAGACTGNTATTCAAATGGCAGCTTCTGATTGGATTTCTGCTGTGCTTCCTGGTGAACAATAAATTTNGTATGATTGTGTACATTTGAGATTTATGATGATTCTTTTTTNTNTTTTNTTCTNNNNTAAAGCAAANATGGAGCAGAAGCGGTAGTCACACCNATTCAATAGTGGATTTCCACTTGTACTATTTTTCTTTTTCTANATTNTTTTGTTCCCTTCTTCATTGTTTCAGTNCCTTTNGGTNACTTAGTTNTTTCTGATTTGAAGCAAATGCTTC…
Gma.4663.1.S1_at	AW309696	At1g73980	1e-132	Metabolism			CCACTTCCTTCTTTGTAACTGGACTAAGCAATGGCTCATTGACTGGATCATTGCTACCTAATTCTTCATCATCTTCTCAATTGGCTAATAAAGAGTCTCCCCTGATGGAAGAGGTACTAGTTATTGCACGAGGACAACGTCAAATCATGCATCAACTAGACACTCTGAGCAATTTTTTGCATGAATACTTTGGAGAAAGGTCACGCCTGGGAAGACCAGACCATACAGGAAGAATGCGTGAAGCTGAATCCGTTGCCATCCCCCTGGTTCTGACTCTGGCCTTTGGTGCTGTTGGTGTGCTTTTGTTCAGAGGTTTTACATCCCAAAAATAATGTGTATATATTTTGTTTCTTGTCAAATTGTCATCACTATGTATGAGACAAACTTCATAAGTATATC…
Gma.4512.2.S1_at	CD409073	At2g30540	2e-38	Metabolism			ATATTTAGAAGATCACAGGGTGCTTGATCAGTGGTGTATCAGGATGGACAAGGTGACGAGGTTGGCTTCTGAAAAGGGTGTGGTGATTTTCACAAAGAGNTCTTGTTGCCTCTGCTATGCAGTNAACATTCTGTTTCAAGAACTTGGNGTGAATCCTGTGGTTCATGAGATTGATCATGACCCTGAAGGCAGAGAAATGGAGAAAGCTCTATTGAGGCNAGGCTGCACTGCTCCAGTNCCAGCTGTNTTCATAGGAGGGAAGCTAANGGGATCCACCAATGAAATCATGTCCCTCCACCTAAGTGGTTCACTCACTCAGATGCTGAAACCTTANCAGGCTTTGTCTTGAAAAGAAGCAC
Gma.4374.2.S1_at	BQ454274	At2g45570	2e-65	Metabolism	Cytochrome P450	CYP76C	CTGGAGACTGCCTGATAATGTCAAGAATGAGGATTTGAATATGGATGAGATTTTTGGGCTCTCTACACCTAAGAAAATACCACTGGAAACTGTTGTTGAGCCTAGGCTTCCACACCATCTTTATTCTCTCTGAGCAGTGCCCTTGCACAAAGGGTTTCTCTCTAATAAGATTGCTGTAGGAATAAAATGGGTCTTGTGTGAGCTTATGTTTGTCACACTGGATTGCAATGAATTTTTCTTTCTTNCTCATNNNANNNTTATAAANAATAAAATAAAAATGATGTTGTGGTGTTAGAATAGAGATTGTGGTAACCAATGTAATAGCAAATGTGTTAGTGAAAGTTTGTAGCCATTTTCTCTCTCANANAAATAGGCATCTCTCTCTCTCTCATCAAGATA…
Gma.4374.2.S1_x_at	BQ454274	At2g45570	2e-65	Metabolism	Cytochrome P450	CYP76C	GAGCTATTGCCATTTGGTGCTGGGAGAAGGATGNGCCCTGGCTACCCTCTTGGCCTTAAGGTCATTCAAGCAAGTTTGGCCAATTTGTTGCATGGATTTAACTGGAGACTGCCTGATAATGTCAAGAATGAGGATTTGAATATGGATGAGATTTTTGGGCTCTCTACACCTAAGAAAATACCACTGGAAACTGTTGTTGAGCCTAGGCTTCCACACCATCTTTATTCTCTCTGAGCAGTGCCCTTGCACAAAGGGTTTCTCTCTAATAAGATTGCTGTAGGAATAAAATGGGTCTTGTGTGAGCTTATGTTTGTCACACTGGATTGCAATGAATTTTTCTTTCTTNCTCATNNNANNNTTATAAANAATAAAATAAAAATGATGTTGTGGTGTTAGAAT…
Gma.4408.1.S1_at	CD405342	At1g79750	0	Metabolism			GTAGTTGGACTAAAAAGGTAGCTTGAAAATTTGTGTTCTGCTATAAATGTTATGTGACAGTAATCTAAATTAGAAAANNAANNANNNNNAAANNNNNNNNNGTATATAAAATNNNTGAAAAGTTGTTGAANNANNNNNNNNNNNNNNNANANNNNAANNNNNNACTGTAGATATCTTATTAACACCTTTCTTTGTTGTAATAAT
Gma.4425.2.S1_at	BF068497	At5g01410	7e-40	Metabolism			GATTTGTTGCTATGTGGCGTTTCAATCTAGATTATGGGTTTGCTAGTGTTTTTAGTTGTTTCTTATAATAAGGTTATGTTTTTTTTTTTTTTTGTGTTTTGAACCGTGTTAATTGGATTTAGAAAAACCAAAAAAAAAAAAAAATAGATAGATGACTATTTGGGCATGCCTTGTAATATGCTGATACTTGTTTTTACTACATATCCAGCGTCGTGGTGGTATTGTGTTGAGTTAGTGCGTTCGTCCTTAAGTAGAATCGAATCATTCTTGTTTCTGGATATTCAATCCTAATTTTCATTTTTGGGGTCAATTTTTTTTATTGGATTCAGAATCTCTTATTTCCANCTACTTGTTCTAGTTTGAACGAGTGTGATTTGAAATTGACAATTTTTGTGTCCG…
Gma.4250.1.S1_at	AW351160	At3g29360	0	Metabolism	Colanic Acid Biosynthesis		GAAGAAGTTTGATTGGGACCACCCTGCTCATCTTCAACCACTGAGTCCAACTTCCAACAAACAAGTATCTGTNGTCTNGGGATGCCTATGAGGCAATCAAGGATGCACATGGCATCTGCATTATGACTGAGTGGGATGAGTTTAAGAACCTTGATTACCAAAAGGTTTATGACAGCATGCAGAAGCCTGCATTCATTTTCGATGGCCGCAACGTCGTGAATGTTAACAAGCTGAGGGAAATTGGTTTCATTGTTTACTCCATTGGCAAACCTCTAGATTCATGGCTCAAGGACATGCCTGCAGTGGCTTAAAGGGAAAAAGCACAATCTGGAGCTTCCTTTAGGGATGTTGAATTTGTTGTTGGTCTTTCAGAGAGAATGCCCC
Gma.4167.2.S1_s_at	AW423990	At5g45340	7e-52	Metabolism	Cytochrome P450	CYP707A	GGAGATTTTGGTCCTCCTACATCATCTGACCACAAAGTACAGGTGGTCTGTTGTGGGTGCAAAGAATGGGATTCAATATGGCCCTTTTGCTCTTCCCCAAAACGGCTTACCCATCACATTATTTCCCAAGA
Gma.4325.1.S1_s_at	CD409538	At1g06550	3e-56	Metabolism			ATTCCTCCAAAAATGTCATGGATTTCTCTACTTTCTGGTATGCATTAATCCAGGCTACTGTTCTGAGTTCTTGAATAAACTTCAACATATGAAAGAAGTTCATGAAGAGTCCTCTAAGTTTGTTGTTGCTA
Gma.398.2.S1_at	BU925900	At3g22740	2e-90	Metabolism			AGTGCCAAATGCCTTATTAGCTCCCCACATCTTGTCCGAAGGGTTCACCTAGATTACCTCGATGCAGGAGCAAACATAATATTAACAGCATCTTATCAGGCCACTATTCAAGGTTTTGAGGCCAAAGGGTTCTCTAGAGAAGAAGGTGAAACTATGCTTAGAAGAAGTGTGGAGATTGCACGTGAGGCACGAGAAATTTATTATGATAGGTGCACCAAAGATTCTTCTGACTTTATGAGAGATGAAAGATATAGGAAACGTCCCATTTTAATTGCAGCTTCTGTGGGAAGCTATGGAGCGTATTTGGCTGATGGCTCTGAATATGTTGGGGACTATGGTGATGCAGTTACTGTCCA
Gma.406.3.S1_at	BI700440	At4g01850	0	Metabolism			TGAAAGGGTGAAAAAGACCTCCTCAATGTATTTT
Gma.4108.1.S1_a_at	BI701465	At4g32520	7e-60	Metabolism	Amino Acid Biosynthesis/Metabolism		GCGATTAATTGAGCATGGATATAAACTGGTTTCTGGNNGNNGTGACAATCACCTGGTTCTTGTCGATCTAAGGCCATCTGGTCTTGATGGTG
Gma.1824.1.S1_at	BI469795	At5g26030	1e-122	Metabolism			GGAATTGGCTCTTGAATCTGGCATCAAGAATTGGGCACGTGTACCTGCCCTTGGTGTTACCCCTTCCTTCATTACAGATTTAGCAGATGCAGTAATAGAAGCTCTCCCATCAGCAACAGCAATATATGCACCGACCAGAACCTCTGAAGATGTTGATCATGACCCAGTTAGATATTTTATCAAGATGTTCTTTGGTTCAATCTTGGCATTCATCTTGTTCTTGTCACCCAAAATGATCACGGCATTCAGGAATCATGTCATTTAGAAGAATTAAATCCTGCTTGCTGAATTCAATCTGCAAGCATATAGATGAAGCCTATTGATAGCAACAAAGTATACTTTGATTTTTTGTCTTTGTTTTACTTATTTCAACCTCTACTGTATACAGCACAGAGCTAT…
Gma.18066.1.S1_at	BG046123	At2g37770	7e-77	Metabolism			TGGCCAGTCCGCATGAAAAGTGGAACATTTGGACTCAATAAAGAATATCTTGAGCAACCAGACATTCCCAATACATGGAGAGCAATGGAGGCACTCTATGACTCAGACAAGGCTAGAGCCATAGGAGTGAGCAATTTCTCTTCAAAGAAGCTTCAAGATTTGTTAGATATAGCAAGAGTGGTTCCTGCTGTTAACCAAGTGGAATTGCACCCAGGATGGCAGCAGCCAAAGTTGCGCGCATTTTGTGAATCTAAAGAAATTCATCTATCTGTAAGTATGGCATATATGATATATACTTTCACTTAAAAGACTTGATATTCCTAAATTATCAAGAATTTAATGGTGATGCACTCACAATGTAAAGTAAGCTTGCATTGTCAACTAATTAAAACTGAGTGT…
Gma.18050.2.S1_a_at	AW597684	At5g54080	3e-45	Metabolism			GGCTGATGGATTTCTTCCCGGTGGTGCAAGTCTCCATAATTGTATGACTCCCCATGGTCCTGATACAAAGTCATATGAGGCTACCATTGCACGAGGAAATGATGGAGGACCTTGTAAGATCACGGACACAATGGCTTTTATGTTTGAATCGAGTTTGATACCCCGTATCAGTCAATGGGCCCTGGAATCACCGTTCTTGGATCAAGATTATTACCAATGTTGGATTGGCCTGAAATCTCATTT
Gma.2216.1.A1_at	BM885752	At3g46940	2e-11	Metabolism	Nucleotide Biosynthesis/Metabolism		TGTTCTGTTCTCTTGGTAATTTTGTAGAGCAGTTGGTGGGTGTAATCGAATGAAGAACCTGTCTTTATCTTTTGGCTTGTTAGTGTTCTGTGTGTGTCCAAGTTATGATGGTATTGATTTGGTCATCGGGGAATGGCAGTAGGTATTAGGTAAATGCTTTCAAAGCT
Gma.2427.2.S1_a_at	BU925875	At4g22570	6e-18	Metabolism	Nucleotide Biosynthesis/Metabolism		TCAAACTCACTTCCCCACTTATTTATACAATGTCGGCTTACAAAGACCAGGATACCCGTCTTCATGGCATCAAAACTAAGATTCGTGTCGTCCCCAATTTCCCCAAATCCGGTTCGTTTTCTCCCCTTTCCTTTTTTGTTGTTTTAAACTTCTGTTTTTTTTTAATATTTTTGTTTTCCGACTAAGAAACCAAAGCCTTTGAATTCATATTTAGTTTGACTTCCGTTTTTCAATTTCTAGAAAGTCTTCTTCGGAGGTTTCGTTTTTTTTTTTTTTNNCAGTTTCAATGGTTTTTTTTTTTNGCAACGGCAGGTATTATGTTCCAAGACATTACTACTCTATTGCTTGATCCCAAAGCATTTAAGGACACAA
Gma.2434.1.S1_a_at	AW348548	At3g02770	1e-46	Metabolism			GAATATCTATCTCTCATTCTCTCGTGCCTCAACGCTTTTTTAACTCCTTTCGCTTTTCCATTCCAACCTCTTTCACACTTCAGATCTGTTTCTTCATCGGTTGTTCAAGTAAATGGCCTTNGTCACCACTGCTGAAGTGTGTGATGCGAACCCNCAGTTAATTTTGAGTGGGGAGCTTCGTGCCCTTCAGCCAGTTTTTCAGATTTANGGNCGTCGACAGGTNTTCTCTGGACCTATAGTTACCTTGAAGGTGTTTGAAGACAATGTTTTGGTTCGTGAGTTCCTTGAAGAGAAAGGCAATGGAAGAGTNCTNGTTGTTGATGGAGGCGCGAGTTTAC
Gma.2183.1.S1_at	CD402949	At1g08630	1e-155	Metabolism			GAAAGCTAGACTTTTGGCTGATGGATTAAAAGAAGTTAAAGGACTGAGAGTGGATGCTGGTTCTGTGGAGACCAATATGGTATTTATTGACATTGAAGAGGGTACAAAGACTAGGGCAGAAAAGATATGCAAGTACATGGAAGAACGTGGTATCCTTGTGATGCAAGAGAGTTCATCAAGAATGAGAGTTGTTCTCCACCACCAAATATCAGCAAGTGATGTGCAATATGCATTGTCGTGCTTTCAGCAAGCTCTAGCTGTCAAGGGAGTACAAAATGAAATGGGCAACTAGTGGAAGAATTTGAATATGGCACGTTGCTGCCATATTAGTCATTAAAAAGGAATTCCGTGTTCCATTTGCCTTTGCTCATTTGATTTTCTTAAATGTACCCTAAAGAA…
Gma.2543.1.S1_at	AI960145	At1g80600	1e-174	Metabolism			AAGAAAGGCCTCTACTTCAAAGAATTACTCAAGCAGAAGTTAGGAGGAAACCAACATGTGAAAGAAATTCGTGGTGTTGGGCTAATCATAGGAATAGATTTAGATGTACCTGCCTCACCCTTTGTCGATGCATGCCGAAATTCTGGCCTTTTAGTATTAACTGCTGGAAAAGGAAATGTTGTCAGGCTTGTCCCACCATTGATCATAACAGAGAAAGAGCTCGAGCTAGCGGCCGACATTTTGTGCAAAACTTTACCAGTTCTTGATAACTAGGAGTGTAAGAGAAAGAGGTTTGGCTTTACAAGCAAAATAGAAAACTTAATTGGTTGTGTATTGTTGAGTAGCTTTTAGATGCCAAAACTTCATGGTTTCCCTTTCATTTAAGATGTCTCGATGGTA…
Gma.2574.1.S1_a_at	BI469532	At1g10760	0	Metabolism			CCTCAGGACATTGAAGGTGTCATCAAGGATGGNAAAGTCTATGTTGTCCAGACCAGACCACAAATGTAGACCTCCATACCTATGTCTTCTAAGCCANCTACCTCAACTATGTTCTATGTTCATTCCCGTGCAACATGGCGTTTCAAACGTGGCCGTGGCAGCTTCTG
Gma.2794.1.S1_at	AI959914	At1g77420	6e-31	Metabolism			TTTGATGAAAAACCAGTCCCTGAAAATTTGCACTCTAAAACAAACTAATTGTTAGAGTTGATTCTTTCCTTTATAGGCTGGTTACAATGTTATTTCTTATGATCATCCAACACGATTGAAAACTGGCATGGAGCTTTTAAGTGCTACTCAAGAAATCGAGTCACAATTACACAAGGTTTCTGCTCCATTATTGATTCTCCATGGAGCAGCAGATCAGGTGACAGATCCATTAGTGAGCCAATTTCTTTATGAGAAAGCTTCTAGTAAAGATAAGACACTAAAGATCTATGAAGGAAGTTACCACGGCATTTTGGAAGGGGAACCTGATGACAGAATTTTTGCTGTGCACAATGACATCATCTCATGGCTTGATTTTAGGTGCTCACTTAAATGAGGTTC…
Gma.3046.1.S1_at	BQ741319	At4g12110	2e-89	Metabolism	Lipid Biosynthesis/Metabolism		GTGGTTTCAGAATGCGTTGCCTGTTGACTNTTTNGGAACCNACCAAAATTCTTGTAGACATATATATATATATATATATCTGCTGTGGCAAAATAGATGTCTTTGGTTAGCTTCAGGGTGGAGATTAGTAGAATGGAGCTTTACAATTTGTGGTTTTGTGTTGGAAGAGGAGGGGGGCACGGGAGGAATTTCTTCTGTTGTCATGTTCTGGAATTCAAACATTTTGGTTTTGGTTCATGTCTGTCAGAATGTTCCTTCTCCTATGGATTGTAAATTCAGAATCTTCTATTGTCATGTTCTGGAATTCAAACATTTTGGTTTGGGTTCATGTCTGCCAGAATGTTCCTTCCCCAGTGGGTTGTAAACTCAGAAATATGTAATAGGCTTCCTCGGCTGGGA…
Gma.3120.1.S1_at	BM270077	At1g48910	3e-92	Metabolism			TTAGCAAGGTTGTGTATGGAGATCTGAGTGAGTATGGGATACCGTATCCGAGTGAGGGGCCTTTCACCATGAAGATGAAGTATGCCAAGTTCCCAATCATCGATGTAGGAACTGTCAAGAAAATTAAATCTCGAGAGATACAGGTGTTGCCAGCTGAAATAAAGAGTATAAGAGGTAATGAAGTTNTGTTCCAGGATGGCNAATCGTACACATTCGACTCAATTGTTTTCTGTACAGGCTTCAAGAGATCAACTCAAAAG
Gma.2736.1.S1_at	BQ742884	At5g57020	5e-06	Metabolism			ATTGGGATTCATTATGGTTTTGCTATAGACATTGTATGGTTGCAAATTATGTGGTGATCCCCGGTTAGACCTTAAATTTTGTTTTACCTTTCGAACAAACAAGTTTTACATAGTCCTCGCTGGCAATTCTGGAATGTCAGTAATGCCCCAAACTGGTATAACTTACAGATTGGTAATTCCTGTTTACAAATTTTG
Gma.3838.1.S1_at	AW099128	At4g15940	5e-86	Metabolism			CGGCAAAAGGGCTCAACCAAGGACATGATNTTTAAGATCCCATTTCTNATTAGCTACNTNAGCTCTGTCATGACATTGTTTGAAGGNGATGTCATACTAACTGGTACTCCCCCGGGTGTTGGCCCTGTNAAAGAGGGTCAAACAATTACTGCTGGNNTTACAGGCCTTGTGGACGTACAGTTTAATGTTGAAAAAAGAGCTAGGCCTGTTCTTTCTTGATAAAACCCTCCTCGAAGGTACTACAGTTCTACAGAAAATATCTTGCCAAAAGGAAACCAGGGGACACAATAAAAATTCAGTTATATGGACTTNAGAGTCTANNCGATATTTAACAGTTTNTTTTTTTGTAATGGTCGTCGAATCCGTACTATAGATCTTTTGGAGTGCTATTTTAGACTT…
Gma.3605.1.S1_at	CD396645	At1g55810	1e-144	Metabolism			GTTACTGTTGGACCCTATACTTGGCACAGGGAATTCGGCTGTTCAAGCAATTTCTTTACTCATAAAAAAGGGTGTACCTGAGTCCAACATTATATTNCTTAATCTCATATCTGCACCTAAAGGTGTGCATGTGGTATGCAAAAGTTTTCCAAGAATAAAGATAGTGACATCGGAGATTGAGATTGGTTTGAATGAAGATTTCCGTGTCATACCTGGCATGGGCGAGTTTGGAGATCGGTACTTTGGAACAGATGATGATGATGAGCAAGTGGTAGTTTCTTCCCAGTAGTTATTGTAGGGCAGAAGCAGAATCCACAATAATTTCAGTTGTTCATCGTTACCAGTGAGACTTCCTCTCGAAAATAGGTTTAAATTTGTTTTATCACTTCGTGTTG
Gma.3429.1.S1_at	BI974673	At5g09300	1e-170	Metabolism			GATGGAAATGATGCTCTTGCTGTTTATAGTGCAGTNCACACTGCTAGAGAAATCGCTATAANAGAAAAAAGGCCNGTTTTAATTGAGGCTCTCACTTATAGAGTNGGACATCACTCTACATCTGATGATTCAACTAAGTACCGGGGAACNGNTGAGATTGAATATTGGAAGANGGCAAGGAATCCNGTGAATNGNTTCAAAAGATGGGTAGAAAGGAATGNTTGGTGGAGTGACAAGGATGAATTGGAGCTTAGAAGCAGTGTNAGGAAGCAGTTAATGCATGCGATTCAGGTGGCAGAGAAAGCACAAAAACCTCCACTTNAGGACTTATTTANTGATGTCTATGANCAANTNCCATCAAACCTTCAGGAGCAAGAGAGACTANTTAGAAANACCATC…
Gma.3537.1.S1_at	AY004240.1	At5g64460	1e-108	Metabolism			TTCTGTTTCATTCTCTAAGTGCTTTTGGAAATGATTGTCATCCAAACGNGAANAATGAAATCTGCACACACTTTGCTAACTGTGAGCTACGTTCAATGGTTATCATTGACAGAGGTATGATTGGTTCANATGAGTCCTCTACCAACTATCCTGGCAAAGTTCCAGATGGCCTTGACCTTCCTAGTGACGTTGCTGACCAGAAGCATCCAGAGAATGGGCAGGCAAACTGATAGTGGAATTTTCTTCATTTTTATGATTTCCTAATTACATTTATGATACCAACTACGATTACTTTTAAGCATTAATTAAATGGACATCAATTTCATGTGTGAANNNNNNANNNTACGTTATTTCTTATTCAAGGTTATTGGCTTGTGTAGCTAT
Gma.3371.1.S1_at	BQ454173	At5g53120	3e-05	Metabolism			TTGCCTGCGTTCCTGAAGAGAGAAGTGAGCCTGCTGCGTGATCTCTCCCTTCAGTAGCATAGCAATGCATGATTGCTATTGTAACCTCTAAATAAGCTATATTGACTACATTGTCATTGACAAGTGTGGGAGAAATAGGAATCTTGTGTGATTAATTTTAGGTTTTCCCATTCTGTGTGTGGAGTCTGATTAGCTATGTTAATCTTAGTCGATTTCGGATGGCTTTCTCTTGTAAGACGCGTATTGCCAATTATT
Gma.13185.1.S1_at	CD397475	At1g22950	3e-25	Metabolism			TACAAGTAAGCTATGGTTCCTGATAGTGTATGTACAAGGTATCTGCTGTATTGAGATAGTTTTCTTCAAGTGAGCTTTGGATTTTTCGTTAAAAACTGTGCGGTTTGTCTGATGCCTATTTATTGTCTGAGGAAGGGGTGAGCTGGTTGTGTTATGTAGGCTGGTTTAATGCTCAGACCTTTATTTTTTTGGCATAAAACCGCAGAATCATGTCAATAAATTTAGATTTAGACTGTAATTAATGTATTCTGAAATCTTTTAGGTTC
Gma.11265.2.S1_at	AW756751	At5g18670	1e-167	Metabolism			CATGAGGTTCAGGTTTCAGGTCAAAATTCGTCTGAATCTGGTGTTCCAGGGGGGTTTGAACAAATTAAGAAGAATTTATCTGGAGATAATGTATTGGACTTGTTCACATATCATAGAATGGGAGCATCATTCTTCTCTCCAGAGCATTTTCCTTTGTTCACTGAGTTTNNNNGGAGCCTTAAGCAACCGGAACTGCATTCAGATGATCTACCTGCTGAGGAGGAAGTAGGTGCTGAATCCGCCGTGGTTATGAGCCGTGATTCAACTGTGAGCATGCAAGCAGCCTAATGGTTGTAAATTTGTAATCTATGATAATCATGTATATAACAATTAGTTATTATTATACTACCCTTGCATCAGTGCATGGGATGAGATTGAGGACAGGTTATTTTGTAAGCA…
Gma.10764.1.S1_at	AW348613	At1g11680	1e-174	Metabolism	Cytochrome P450	CYP51A	AAAGAGTATGACATTCCCAAGGGTCATATAATTGCCACATCACCTGCTTTTGCAAACAGGCTAGGTCATGTTTTCAANGACCCTGATAGGTATGATCCNGATCGATTTGCTGTGGGGAGGGAAGAGGACAAGGTGGCAGGTGCATTCTCATACATTTCATTTGGAGGGGGCNAGACATGGATGCCTTGGGGAGCCATTTGCATATCTGCAGATAAAAGCAATATGGACTCATCTG
Gma.10580.2.S1_a_at	BM954800	At1g06570	2e-22	Metabolism			GGTGTGCAGCACCTTGCGCTTGTTACTCACGACATCTTCACCACACTGNNNNNNNANANNNNGANNNNNGNNNANNNNNNNTTNNNTNGNNNNNNNNNNNTNCATGCCTTCTCCTCCTCCCACCTATTACGCCAACCTCCACAACCGTGCCGCTGATGTGTTGACCGTTGACCAGATTAAGCAGTGTGAGGAGCT
Gma.10650.1.S1_at	AW348549	At4g01070	1e-123	Metabolism			TTTTGGTTCAGTCTTGGGCTCCGCAGCCTCAGGTATTGGGCCATCCATCCACGGGTGGGTTCTTGACCCACTGCGGCTGGAACTCTATTCTGGAGAGCGTGGNTGAACGGTGTGCCTTTCATAGCCTGGNCCTCTGTTNCGCGGAGCAGAGGACCAANCGCCTTTATGCTCACGCATGACGTCAAGGTGGCGCTGAGGCCCAACGTTGCAGAGAGTGGCTTGGTGGAGAGACAGGAGATAGCCAGCCTAGTCAAGTGCCTCATGGAAGGTGAACAAGGGAAGAAGCTTCGTTACCGAATCAAGGATATCAAGGAGGCTGCGGCTAAGGCTCTCGCTCAACATGGTTCCTCCACCACCAACATCTCCAATTTGGCTCTCAAGTGGACCCACAAATTCAAC…
Gma.11027.1.S1_at	BG511525	At5g43940	0	Metabolism			GTTGCAGCATCAGGGCAGGAAATATCNACCCGTCCNTTCCAGTTGGTGAGTGGACGNGTCTGGAAAGGAACAGCTTTTGGTGGCTTCAAGAGCAGGTCACAGGTGCCTTGGCTTGTAGACAAGTACTTGAAGAAGGAAATCAAGGTTGATGAGTANATTACCCATACTTTGACNCTTTCGGAGATCAACAAGGCTTTTGATCTTTTGCATGAAGGGGGATGNCTTCGNTGTGTGCTTTCNACACAAGAATGAGGTTATCTATGCTAGCCTGGCTACTTTCGTGAGGAATGGATGTGTTGGGTTGCTTTTCCCCTCTTTTAGTGGTTGTAGTTTGAACTTGAAATAAATCTCGAGTGGNTATAGTTTGTAAGTAAGATCATTTTGGTCTATAATATGGAT…
Gma.11166.1.S1_at	AW705829	At1g55020	1e-156	Metabolism			AATCCAAATTGGACTGATGACACAAAGGCAATTCAAGCCTTTAAGAAGTTTGGAAACAAGCTGAAGGAAATTGAGGACAAAATCTCAGGGAGGAACAAGAATTCAAGCCTTAGGAACCGTAATGGACCGGCGCAGATGCCCTACACTGTGCTTCTTCCTACCAGTGGGGAAGGCCTTACTTTCAGAGGAATTCCCAACAGCATCTCTATCTAATGAGAGTGTGTGGTGTGTGGTGTGTGGTTTTCTTTCCTTCCAACGTACCTCTCATTGACAAAT
Gma.11166.1.S1_s_at	AW705829	At1g55020	1e-156	Metabolism			CTCTCATTGACAAATAAACGTGCAAACTTATGTGTGCATAATTTTCTTATGTATGCTTAAGTTTTGTAATTGGATGCTATCTAGTTTTTCATATCTAATAGGGTGTTGTGTCAGTTTTTATGTATAGTATTGTGCTCCT
Gma.11238.1.S1_at	BQ454110	At5g60600	0	Metabolism			GGCATTCAAGGCCATAGTAAGATGAGCATTGTCATATCCAATTATTGTACACATGTAATATAAGATAACACTCAATGCTTAAGTTTGAGCCTAGTTTTAAGTTCCTTTTGAGAAAGATCCCAATTAAAGCTTGTTGTGAGGAAATCGACAGCTAGAACATGTATACAGATAACAGTGTATTGCTTTGCCCCATCAGCCATCAATAATAAT
Gma.15179.1.S1_at	CD402104	At3g48560	2e-83	Metabolism	Amino Acid Biosynthesis/Metabolism		TGGGAGGATCGGTTCTATAAGTCTAACAGGGCTCACACATATCTGGGAGACCCCTCTAATGAGAATGCCATATACCCCAATATGTTGAAGTTTGCTGATGCTTGTGGGATACCGGCAGCTCGTGTGACCAAGAAAGAAGACCTTAGAGCGGCAATTCAGAAAATGCTGGAGACCCCTGGCCCCTATCTTCTNNNTNNNNNNNNNCNNNNNNNNNNNTCAAGAGCATGTCTTGCCCATGATTCCTAGCAATGGAACCTTCCAGGACGTGATAACTGAGGGTGATGGCAGGACAAGTTACTGATTTCCTGAGCATATTTATCTTCATGGTGGTTTTGTAAAAATAGTAAGCTAATATAGCTTCTTAAATTTTGTCTTCACGTTGGCTACTAATATAGGCTG…
Gma.15323.1.S1_at	BQ786753	At2g35120	5e-67	Metabolism			GGGAAAGCTGCTAAATTACTTATTCCTTTTTCTCCTTGTGTCATGGTTTGACCACTGCTCTATTTTTATTTTTCATAAGCTTCTGAACCAGTGGGATGATATTTTTCAC
Gma.15392.1.A1_at	CD416483	At4g17770	1e-36	Metabolism	Trehalose Biosynthesis		AATGCAAAGGCAACCCTATCTCCAGTTGCTGAAGTGTTTCCATGCACTGTTGGCCAGAAACCTAGCAAGGCAAAGTATTATTTGGAAGACACAAGTGAGATTTTGAGAATGTTGCAAGGCCTTGCCAATGCTTCTGAGCACTCTACTAGAACTTCTTNNNAACCAGCTTCTCATTAAGGTTCTTTTTAATGTGTAGAGTGCAAACACACACACACACAATTTGGCTACAATGTAGTACTATTTTTCTATACTATACTGGGATATCTATCTTGTGTTAGATTTCGTGATCTATTTTATTTTCTGGCTGACTTGCCTTCATTTATTGATATCCCAACTATGTTGCAACTATCAATAGGTTGTTTTGAAAGTAGATGAATTACATGGGGTACTGTATTTATT…
Gma.14360.1.S1_at	BI943706	At5g16990	2e-36	Metabolism			ATACAACTCATTCGTTCTTACAAGAACTGAGTTCTGTTCAACATACCAAAGAATCCCCTACCTATAGCTATTGAGAGAGGGTGTGTTTACACTTTGGAAATGGCAGAGAAAGAAGTGAGAAACAAGCAGTTGGTATTAAGGGACTATGTCACTGGCTTTCCCAAAGAATCTGAATTATATGTGACTTCCAATGGTACCATCAAACTGAAGCTAGAAGGTGACTCCAAAAGGGTTTTGGTCAAAAACCTCTTTTTGGCAGCTGATCCACACCTCANGCCCTTGATGAAGAAAGCTGATAACCTTAGTGTTTTGCAGTCCTTCACCCCTGGCTTACCACTGTATGGATATGGAGTGGCTAAGGTTGTGGATTCTAGGCACCCTGATTTTGAAGAAGGTGAC…
Gma.1555.3.S1_at	CD397060	At1g03475	1e-163	Metabolism			CTGACTGCTCGGTGGGAATACGATCATAAACCGGAAGAAGGAAGCGAAGAATGGAAACTCTTGGACGCATGCATCAACCCCAAGGAATGGATCTAATTCATCAGTTGACCCCCCAATTTGTCAGCTTTTTAATTTAATAATAAGGGAGCTTGTTTCTTTTTTCGGTGTATATCAAGTGCTTGTTATGATGAGTCAGAATGTTAGCTTGTTGTACTAGGTGGATTGTAAATCACGTATTTTGCTAGAGTCATCCGCGTAAAGCGTGAAAATGCAGAAAATTACAAATGTCTAGGCTGCGTCTGTAGTATACCTACTGCCAACCATTGTTCTTTCTACAAGTAACTCCTCAATCCCATGTAAGAAAACAAAAGGCAGCTTCTTTAATGCCAGTATTGCACA…
Gma.15483.1.S1_at	BE820423	At1g23190	0	Metabolism	Sucrose Biosynthesis		AACACTAGTGTTGGTTGTTTGCAGCCTTTGCTATGGGCACTTGAGTGGAATTTGATCAGTTACTTTATCAAAATTTTGATGTGCTGAATAAGTTGCAACTGCCGAGTGCTAATTCTATTATATNGTCNTAATATGATGGCTCCTCTTGTATTGGCGTTTTATTAGGAGCATTCTTTCCTTCCTTTTTTTTTTGGTCCCTGCGGTGAGATTTGACTTCTCTCCTAAACTAACTTTGGAAGAAGATAGATGGCCACCACCAGCTGAACAAAGGCTAGCCGTTTCGTTGCAAATA
Gma.15687.1.A1_at	CD397262	At4g34135	3e-60	Metabolism			GATTTTGGACCATGAATCCGTTGGAGGGTTTGTGACACATTGTGGGTGGAACTCAGTATTGGAGGGGGTGTGTNGCAGGGGTGCCAATGGTGACATGGCCAATGTACNCAGAGCAATTTTACAATGCTAAGTTTTTGACGGACATAGNTAAGATTGGGGTGAGTGTAGGCGTTCAAACGTGGATTGGGATGATGGGAANGGACCCTGTGAAGAAGGAACCGGTTGAGAAGGCTGTGAGGAGGATCATGGTTGGAGAGGAGGCNGAGGAAATGAGGAACAGAGCNAAAGAGCTTGCTCGAATGGCNAAGCGTGCTGTGGAGGAAGGAGGATCTTCTTACAACGATTTCNACTCATTGATCGAGGATTTGAGNNTCGCGTGCCTGTTGATGATTGTTGTGT…
Gma.15918.1.S1_s_at	BM519864	At2g16570	1e-109	Metabolism			TTGTTTCTCTGGGAATTACCCTGTGGAGCCNAGAGAGCTTAANGTGAAGAGGGTTGGGGACTTTGTTGATGATGGCTTGAATGGNAGCTTGGAGTCTATTGATGGTGGTTGGGTTCAGGCAAACCNAAATCAAATCAAGNTTGGTACTGGTACTAGTACTAGTATTTCATAATANTCCTATATCTGGTTTTTGCAGCATAAGGCATCCCTCAGTGGACAAAAATCAGATGCAGTTCTTCAGGTGTTTTTGGTGTTGTTCT
Gma.16522.1.A1_at	CA851253	At5g46180	1e-40	Metabolism	Amino Acid Biosynthesis/Metabolism		AAATTTGTTCCCTGTATCTGGCTATGAGCTATGCAAAAAATTGAAGTATAGAGGAGTCCTTGCCAAGCCAACACATGATACAATTATCCGCTTTACTCCCCCACTTTGCATAAGTCTGGATGAGATCCAACAAGGTTCCAAGGTCCTGGCTGATGTTCTGGAAATTGATCTACCAAAGTTGCAGAAGACANAGCCAAAAGATGCTGCTCCGGTTGCCTCTAGTGCATGTGATCGTTGTGGTAGAGTCTTGTATTAACCATATAAAGACGTATAGATTGCATGTACCTTTAATTTTCCTTGGAAAAAATTATCACATGAAGAATGTTATTCCTTATACATGAACCCCTGGAAACTATGCTCCAATATTCCATATATCATCATAATTTAAGGCCATGATAT…
Gma.16697.1.S1_s_at	BQ627551	At4g27070	3e-24	Metabolism	Amino Acid Biosynthesis/Metabolism	Tryptophan Biosynthesis	TATCTAGAGAAAGTGTGTCCAACCCTTGCTAATGGAGCCAAGGTTGTGGTTAACTTCAGTGGCCGGGGTGATAAGGATGTTCAAACTGCTATCAAGTACTTGAAGCTTTGAAAGGATCAAAACTTGCTGAGTGAGCTTCATTTTCATACTTAGAGACATAATTAATACAATTTATTATTAGACCAAGTTAAATAGTCATGTATATTTGCATCAGAGAACTGTTGCTATTCAATCCTCAAT
Gma.16982.1.S1_at	BF425703	At4g14930	4e-16	Metabolism			TGCTGCTCTCACTCATGTGGAGGTAGATTGTCAGGCCTATTTTAAGAATTGGCTACAAAGTGTCCCCGAACTCCCCTCGTCATCATCTTTATAATGCTATTCCTCCGGTTCACTGGAAGTGATGCCAACTCAATCTGTTGCTAAATCAATTATTTTGATCCTGAGCAATTTGGTTGCTCCGGTATGCATGCCATTTCTCCATTATTATCATCGGGCAATAAAGACATCTCAACAGTGTTATATAATTGAATGAGAGCTTAATTTCTGGAATCTNNNNAGTAATAACANGCCACTNNTTTTTAGATTAATATAGTAGCAATTCTTAGTCTGTCTT
Gma.17250.1.A1_at	BI969790	At2g36800	0.0003	Metabolism			GAATGAGACAGAGAGCCAAGGCTCTTAGTAATGCGGCAAAAAAGGCTATAAAGCTTGGTGGGTCTTCTCATAACAATATGATGGAACTGATTCGGGAGCTCAAGGAATTGAAACTCAGGAGGAAGCCTCAATAAATTAAACANGTGCCTAGTCCCAAATCATCACATGTTTTTCTTTAATTAATAAAAGTTTAGGTTTGGAATCGATTAACATGATTAGGAGATCGAGTCTGAACATTCCATGAAACACTTAAAAAAGTATTTATAATCCATCAATAAAATTCTCACAACCACCGT
Gma.16977.1.A1_s_at	BE821395		0	No Homology to Known Proteins			TGTGCAGTTTGACAATCTACCAAGTTGTGCTT
Gma.17354.1.S1_at	AW596842		0	No Homology to Known Proteins			GCCCCTTTGGCGTTACTGTGTATATTGGTACTGCTAGTTCACGTTTCCTTCACGTTTCAAGTTGTGTTGCCCCTTTTTCCCTTAGTTCCATTACATTGGCTGGCTTATAATGGAAAAGAAAAAGTAGCCCTCATGTACCTTTTTATTTATTATTTTTTTTTTTAATTTGATTTTTCTCTAACATGTTCCGTGTACAATGATGTTAGGAATCCTTAAAGGATTAACAATGACACAATCTTATATTCTTTGGCTTTTCACCTCGAATTGATGATGTCAGGTTCAATGTTCTTATATTCTTTTGTCTTTGTGTCTAG
Gma.17357.1.S1_at	AW598033		0	No Homology to Known Proteins			GTGTAAATTGAAAATCCGGAGGGAGGGGTTTATTTGTGTTATAATTTATTAGATTAGCATGTATTTAGTTTTGATTCATTCAAAATCTCCACATGGAGGTTTTCTTCCTTGCTTTTAAGGCGGCATTTGACAAATCTTCGTGGTTATGTATATATATAAATATACACATTATACCTGCTCAATCGGGACTAGAAAGTTT
Gma.17560.1.S1_at	BG508832		0	No Homology to Known Proteins			GTCAACTTGAAAATGAGTCCTCGTTTTGTGTTGGATGTGATTTCACAAGACTTCATTGCTTCTGTCTATAGTCCTCAGTATTTTGATGGCAACTGTTCAAAGTTTCACTATCGCTGTTTAGAATTCATCATCCAATTCTGTTTAGAACCCCATGCTAGGTCATTCTCTTTTGTGCTCACCCCATCTG
Gma.17598.1.S1_s_at	BQ452947		0	No Homology to Known Proteins			ACACAAATCCAACGATACAGAGGTTATCAACAAAAGAACACCACTTCAGAGATCCCTCACTAGAATTAATGACTGGAAAGGCTAGACACGACCTCATCTACCAAAAAACTTGTCCCACATCACAAATAAAAATGCCAATCTTGACTGCATGTTCTCTAAAGAGTTACCAAATAGCTTTCACCATACAATCCCATGTCTTTTT
Gma.17089.1.A1_at	AI938052		0	No Homology to Known Proteins			TTTGTCCCTTCAACTTTCACCTCATTTCAACTGCTTCTACATCTATTCTATTGTTCACGTGCGTCTCTGTGGCGTAGAATCTTGTTAAATTGCAACTCTTGTAAATC
Gma.16792.1.A1_at	AW350500		0	No Homology to Known Proteins			GTTATGCTCTATTACTTGGTGTCTTTTATGCTTTAAGCATTTAGGATGCACACCTGTTATATTAGCTTTGTGTAATATTAATTGGAGGAATTTTAGGGATAAAGTATGCGGACTCGTAGCTTAATTTGGTTAGATGTTGTGTTCACTTGGGTGATTCAAGAGGTTCTGGCAGGATCGGGTTAGTATGTAGGATCTTGATGAGATGCCGGTGACTTTGTCATCCGTTAGTTGTAATTTATTGTCGGTCCATATGCCTAAACTTTCTCCTTGTTAC
Gma.16828.1.A1_at	AF047051.1		0	No Homology to Known Proteins			AGCAGTAACAACATTGTTTTGAGCTAATAACATAAGACGAACATAAACTACTTGAATCCAACAAAATGTATCAAACATCAAAAAGGAGAAACCAGTGCCACTAACAACTGGGTGTCCCATTCGACA
Gma.16861.1.A1_at	CD401560		0	No Homology to Known Proteins			GTCTTTTAGTAAGAGCATAGCTTAAGAGCATGATTGATTCACATTAGCCGTTTCGTGCGTCCTTTTCAGTAATAATTTTCTTAAGTTCAAGCTTAGAAGTTTAGACTAACTAGCATTTTGGTCGTCAGCTACTTCCTTCACTGTCAAACAGTGCCACAGTGCATTCAAGTTGTCGAAATTGCTTTTCTGTGTTTTCTCTTCCCTTGTTAGTGGTTAATGGT
Gma.16631.1.S1_a_at	BU549854		0	No Homology to Known Proteins			TATCAGTTTCTCCATAGTTTCCTTGGAAGGAGGAGCTGCGAGTGCTTGTACATTTTGCCTCCATATCCAGTTAAANNNTAGTTTTATTGTCGTCTTCAAAACCATCAAGTGAATGGGTATCTCAAGGATTTCAAGATTGTNCCTGTCGTCATTGTCGCCTTTTATTACGTGTTCTTCCGGTGAATGCTTTATATGATAACTCCGAGGAAATGGATCTTATACTTTCACATCTCGGGATATTTGGATTT
Gma.16611.3.A1_at	BF424501		0	No Homology to Known Proteins			AAAGATGAACCACACAAACTGAAAGCTCTCGAGAAAATGATGGAGAC
Gma.16295.1.A1_at	CD411116		0	No Homology to Known Proteins			TCTGGCGGTGGTGGTGCCTACCAAAGTGGCTATGATGGAAANCTAGGAGGTGGATATGGAGGGGCTAGTGGTGGCCCCTTCTATGGGAGCAGTAGAGCAGGATACAGTGCTGGTCGATATCATCCTTATGGAAGATAAGATTGCAAACAAAGCATTTATAGTCTAGGACTAATATGTCTAGCATCAAAGCTAGTTTGTGTTTGGTTCGTCAACTAGATTATATATTCTCTTTCAAAAAAAGAATTATCAAGGTCACTCTCATTTACCAGTACNACATCCATTTCTTGAAGGTCCAAACAAATTTTCTATTCCCCCTCCCCCGAAGTCTGCTTTTTGATTTATGTAAGAACTGCTGCAAATGGTTGTATTCTCTGTCTCATCATCGTTGCTTGTAATGCT…
Gma.16136.2.A1_at	CD412154		0	No Homology to Known Proteins			AGAAATCGCGTAAACAAGCTGAATTTTTACATTCTCAAACTTTTTCTATGTTTTATGTGTGTGCAGTTGTGCCTCTCTACAGGAAAACAGATGAAAATTGTTTTCTCACCGTTTGCTTTCCAAGGCCGCATTACATTTCATTTAATCAGCTGGAAATAGGCATGTTTTGTGCTTGTAATGTGTAATTGTTAATCAAACCAAACTAAATTGAATATTCTGGTTTGTCTTGTCTATGCGCTTTTAT
Gma.16277.2.A1_at	CD399645		0	No Homology to Known Proteins			GACTAGTCTTGATTTCTCCAGTTATCCTTGATATGTCAAGCCAGACTGCTGATTGATTAAGTGAATGTAAGGGTATCACATGAATACCTATAGCGTCAGAAATTTTAGCTTTCAAGTTTTTCTAGCACCATGTGGCCTTATATGAGTTAGCTCATGCAAGAAGGAAAAAAAAAACAATTTTGTGCTACGGACATATTTGTAGGCAGTAATTTTTTCTATACTTTATCGATTAGTTTGCTCCTGTACCATCATTTTGATGGACCATGATTT
Gma.16412.1.S1_at	BM885956		0	No Homology to Known Proteins			AACAGCACGGAGTTGTCAAAACCCAGGACCGAAGTTGGAGGTGCACGGTAGCGTTTGTACTTTGTAAATTCCTGGTTGGCCTATGGAGATAAATTGAATTTGTAATAACAAGAAGCCTGTGGAGATAGTACTTGTGACTTCCGATTATTGTCCTTTCAAATCGTAGTAGCACTACAGTGCTTGTTACAGCTCTCATTTCTTGGATACTGCTTGCACTAAGTAAACAGTTTGTGACATGAATGGTAATTTTATATGTACGCTTCGTTTGGTGCAAGAAAAATAAAGGGGAAATNGAGATGAGATAGTAAANNNNNNNNANNNNNTGGTGTGGAATTTGGAAAGTAGAAACGAACAGTAATCTGATACGGTGTATAAATTTGTGGTGGATCTTTTTTATTG…
Gma.15898.1.S1_at	AW460025		0	No Homology to Known Proteins			GATTCTTCTGGCACGTAACTAACAAAATAACTTGACGCTTCTTCAAAACTAACATGTCAAAGATGTTTAGTGTAAAAAATTTTAGGTTTTCCATGACTAGTTTTAAAACTGCAGCATGTTACTTGAATTNCNNNTNCNCAGGCTTGTCTGAAGNAAGGTACTGCTATAATTGGACTTGTTATGTTTGATGATCAAATTNGCTGCCTCATTTATCTACTGTTCACCAGTTTTGAAACTCATTTGTTTGGATCAGGATTCAATAGAGGTATGCCTTAAAAGCATAACCATTTANTAGTGCCATTGTCATCATGGAGGTTAGTTTGCCGTTGATTGTGGTTTTCTATCAAGTAGTTTAGGAAANGGTAAANNGAAAAANNNANAAAAAATGCAGAAGACATG…
Gma.15940.1.A1_at	AW397591		0	No Homology to Known Proteins			TAATTTCAGTTCAGAATTGAGATTCTTATTGTAAATAGGGGCAGTTAGATTCAAAATTTCTTTGCAATTTGCGTTATATCAATAGATGTTTTTCTCCAGAAATGATCGCCGAAGGGGACTCGAGAGAAAGATTGTTCTTGCTGCAGAACATACGTTCTGGGGGAAGAAGACATGCTTAATTACTTGATTTTTTTAATGTTCATATAGTATGTTTTAGCCGCAAATTCTTTGTAAGCATTGTTTTTAGTTTTATGTCCTATGTTTTCCCAATAT
Gma.15838.1.A1_s_at	CD415635		0	No Homology to Known Proteins			TATTTATTATTACATCTTCACTAGACTTCTTTGTACAGCTTGTGGTAGCAGTAGAGTGACTTAGAATATAGCTTCTCATGCTATGGAAAATCTGTTTGTTAATCTGTACTGGGAATTTCAATTTTCAACTCATCCAAACCAGAAGGCATCTTGCCTTCATTTT
Gma.1588.1.S1_at	CD404759		0	No Homology to Known Proteins			GTAATGGCTTTATTTCAGCTGATTATGAGGATGGAGGTTGGGATCGCAATAGGGGAAATGCTAGGGGCAGGGGTAGAGGAAGAGGACGTGGCTTTCGTGGTCGTGGAAGGGGAGGGTACAATGGGCCCCATGTTGACATGCAAGATGGAGGATACAACCAAGATGTACCTCAAGGCCGTGGTCGTGGCCGTGGCAGGGGGGGATATCGTGGAAGGGGTCGTGGCTTCCGATCGAATGGGCCAATCCAAGCAGCTGCCTGAGGCAACCAGTAGGCCGCCATTAGTGCAGTGCAGATGACTTGACTAGTGAAAGAAAGCCATGTCTAATTTTATGTTTTCTTTTATTTGTTCAATTTTCTTCATTTCCCCCTTCTTTTTCTCTGGGGCCCTGAAGAACTGT…
Gma.15690.1.S1_at	CD393040		0	No Homology to Known Proteins			GAAATTCCTGGATTGGCAGGAGACCTTATTTTGTTACTGGATGGGCAGCATCTCTTTTTTTTTCCTCTTCCCCTCCTTTCAATCCTAATATTCTTTCCCTCTATTTCTGTATCTTCTTCTGAAAGAGAAGGTGCAATCAATGTTTCAAATTGTGTTTGGCTTGCAAGTGAAGAAGAAAATGTGATTGTAGCTCTCCTACAACAGATACTAAAGGATGTTTCAATATCTGCCACCAGGATTCAGATTAAAAAATGTAGTTTTTCTTTTCTTTTTTTGCCCAGATATTTCTGT
Gma.15617.1.S1_at	CA852426		0	No Homology to Known Proteins			GAAAGCAAATGTTGCCCGCGGTCTTGTATTTTGGGTGACTGGCGGAGAATATTTTGATTTTGCCAGAGAAGNNNNNNNNNNNNNNNNGATGTAAATATGTGATTTTAGTGTGTAATTAATTTGTATAGTAAAAGGGTAGTCATGAAATGGATTGTGATTGCAATGATAGGCCCAATACGAGGCATGATCGTGGGATGAGTGCAATCCTTTATCGGGAATTCTTTTTCCATGTTGACATTGGGGCATTTCTTTTATTGAGCCCCTGAAAGAAAACAAGGAAATTCAGAAGGTCATTGCCTGTGATTTGTAC
Gma.15475.1.S1_at	BE190311		0	No Homology to Known Proteins			GAGATACAGATATTGATGCTAGTTCATTGGCTTCCTGTACAAAACTTCAACAGGAAGAGGACGTCTCATTCAGTGATCTAGATGATGATAGGAGTTATAGCTCTGACAAATTATCAGGCTATAGGGAGGCACATGANNNNNGGGGTTCATCACCTGAAGGTGCTACTAGTGACTGGGTTCGGCTGCGTNAAAGTTCTGAGAGNGATGGCAGGAAGAAGGTTATCCGTNTNAAGGGTAAGGATTCAGAAGATGAGTCAAATGATTGGCTCACTGTTGATGATTTCAATTAGATAGTCTTTTCTTGATTNACCAAGTTGTAAAGGTTCGATATTTACCCCCTTCCCCGTGGTTCTGTATTTAGGGAGTACAAAATTATATAAATCAAAGTATTTCTTTTCT…
Gma.15575.1.S1_at	BU765551		0	No Homology to Known Proteins			AACAATCAAATGCTTCCGAAATCTGAAACAAGTTCTAAAGAAAACATGGAGCCTAGCAAGGAGGAGTTCCATCTATGGAACTTGAATGGGGAGTCCAAAGCACTTTTGGATTGTGGTGAAGAGGATTCCAAGCTTGGAATCATCAGAACAGAAGATGATCACCCCTTCAGTTCAGCAGAAATGCATGCCACTGCCTCTTTGCTTTCGGCTTGCTAGAGACGGAAATACTAGTATACTACAAGGGTGTTGAAGCAATTTGAAGATTNAAATGAACCCACCAAGTTCAAGTTGTTAGCAAATATTGCATTTTCAATTCAGAAGAGCATAGTCTAAAGAACGTCTTATGGTACATGTATTCATATTTGATGGATATGGGCAACCATTATGTTACTGCTANAA…
Gma.15590.2.A1_at	CD399065		0	No Homology to Known Proteins			GTTGATAATCGTTTAATGCCTGTGTTGGAGCCCATTATATCTTTCTTTGGTGACTCCCAAGCTAGAGCAACTGAGGAGGATCATGAGGACTCATAATGAATGTTGGTGCTCCTTGGCAGCATAGTGTTAAAGCAAATTGGACCTTTAGGCACAAGATTGTTGATTTAGAGAAAGATTGTTTGAGATTACATTAATTTAACTTTATTTTGCAAAAAAATTGGACCTTTAGGATTTTATCATTTGTTCTGTTGTGACTTTCTAA
Gma.15552.1.S1_at	CA852615		0	No Homology to Known Proteins			TATGTACAAGTCTGATGCTGATCGTGGTCAGTGGAAGTCGTCGAGATCACCACCTGGATCTAGATCAAGATCTGCTGAATTGTCACCAAGGCGTGGAAGATGAGGTTGCAGGTCGCTGGCAATGTGCTGTTAGGCTTCTGTACATTTCCTGTAACTTATCGTGACATTTGCAAA
Gma.1543.2.S1_at	BG507578		0	No Homology to Known Proteins			TTACATTTGCGGTTGTTAGGGCCATGTTGATGGAACACCGCCGAATTATGTATCTTTATCACAGTCGTGCTTTTCGGAAAGGAAAAGGATAACTTAGAGTGAAAACTTTTACAGTTGATATATGTAGTTTGGGATTCTGTTATGAAATATTTGTTTTCGTTGGGTATGACTATGAAATGTGGCTGAAGAAACCGAAGTCTGCTTGTATTATGCACTCCGGCTTCCTTTCATTGGATTTAATCATTTGTTTATTCAAGTATTCAACAAGTGGGTTTGGAAGTGGGAACCATGATCTCATCTATGCATGCACACAACACAAAGAAAGCATGGGCTGCATTGTAGGAGGCTGCAGAATTCACCCATTGTTGCTTTGTGCTTTGGTTAAAACT
Gma.15437.1.S1_at	BG508889		0	No Homology to Known Proteins			AACTTCTTGTTGCATACACGTTGAAATTCAGAGTCGGAGGAGATTTTGCTTTTGAAGCTTCACGACCATATGTAATCACCTAACTAATATTATCATGTAACGATGTCTTATGATTTTCCAATTGTGATGTGAGG
Gma.15443.1.S1_at	BG511517		0	No Homology to Known Proteins			CCTCTATAGTCTTTATTATTGCTCATCCCATAGCATGAAATCATGAATTCCAACCACACTTAACTGGCTTCGAATAGGTGTGCGATTAGATTGATTTA
Gma.14127.1.A1_at	CD415773		0	No Homology to Known Proteins			AAGATGCCATCACCGATAACAAGGGTGCTGATCTCGAAGAACACATCACCGATAACAATCCTGTAGTTGTGACTCAGTGAACTGTGTTCCAGTTGTTCAATATGAACTCTTTCTTTCTAATGGATTTGTGCCTCACTTTTCACTACTTCTGGTTGATTACTATTTGCCTAGCATCCCTGCTTCGCTACATATACATACAATCAATATACAAAAGATGTGATCTGTTTCTGTGTCCAACACTCACCCACTCGGTAAAGACA
Gma.14129.1.A1_at	CD415788		0	No Homology to Known Proteins			GCTCCTCACATACCCTGTTGTGTATGTGGGATGGAGCAAATGTACTTTTAAGGCTTTTGTGCAGCAACATTACCATGCCTTGATCATGGCTGCTAACCTTAATGACAGAAGCTGCAATATTTTCCGTAGTCATCCGTAGATAATTTTGTAACGTCAATTGTTTAATTAGTGAGATAACTGATTTGTCGGCCNTTACTTACTATCGGAATTTTATATGGTTGTAACTATTCTTATTCGGG
Gma.14204.1.A1_at	CD417515		0	No Homology to Known Proteins			GTGACAATGTAATGTGACTCCTCTTGTAACACGCTTGCATGTTATTTTTAGTTGAATAAGTATAAGTACTAGGTAGCGTGTAATTGGGTATCCTAACATTGAGTTTAATCTTGATTTACATGCTCAGTTTTTAGTATCATCTA
Gma.14213.1.A1_at	CD418017		0	No Homology to Known Proteins			GTGGCTAGTTGTCATCATTTCTTTCTTTTTTGTTGCAATCAAATTGATTGACTGTGGGTGGCCACTGTTGAAAACTCGAAATAAGAGAAAGAGACAAACATGGTGGGAGAAATTTTGGGTACTACTTCTGGCTTGACTCTTCCGTGCTGGTGGGGATTTTTCTGTGTGAACATGTTTGGGAAGCCATAAAATATTGCCTTTTCTCTCTCTCTCTCTCTCTCTCGCACATTTTAAAATTTAGAAGAATACATTGCATCAACAGCTCCTATGCTGTTTG
Gma.13983.1.A1_at	AW101913		0	No Homology to Known Proteins			TTTTTCACCTTGGAATTCATCAATGTCTTCGAAAGTAGGTTGTCTGTAGCAAAGGAGTGATTGTGAATGCTTATTTTATTTTCTATGTATCCTTTTTCAGAGTTCACATTTTTTTTGNCNNNCGNNNNATTAATGTGAATGTCTATAGCTACATGTATCGAGAATTTTATATAAGATTGTCAGTTCGCACTCAAATTATCAAATTTTAGTTTATTCATGAATCACTTGCCCGATATTTGAGTGTGCTATAGGCATGAAGACACACTTAAAAGTTGTAATGGTGAGGATACCTGCACGATCCCTGGTTT
Gma.13836.1.A1_at	CD407625		0	No Homology to Known Proteins			GCCTTTTGAACAAGCGCAGGGTGGTATGGTCGTGGATCCAAGGGAGGGCAAAGGTATATTGGCACCACAGCCCATGCCCCTCCCACCGCCACCTCCACCTCCATCCCACATGTCACATGGGAAACAGAACTACTATTCTGGGGAGGTTGGGCATGATGGTCAGGGTTATGGGTGGCAGCATGATAACCGTGATAACTTTGGTAACCAAGTCTAGTAGTGAGGTTTCCAANAGATACTTTCTTGGATTAGGTTTAGTTACTTCCGAGGATGTTTTTACTAGCATATTTGTCCTCATGCATCATTCAAATCTCTAAACAGCNATTAAACTATTTTACTTTTGGTCCAATTTCTATTTGTAT
Gma.14067.1.A1_at	CD414740		0	No Homology to Known Proteins			AGCCAGACAGAAGCCGCTGCTTCATTTTAAGAGGGTTCCATTCATCCTTGATTTAGTTTCATTACCTGGGGTTTATATTTTTATTTTTCCTTTTAACTTTGGTGTATAGAGAGGAGGGGCATAGAATTCTTGGATATGATGATAGTTTTGATATGGTGGTTATTATTGCTGGTGGTGGGGTATGTGTATAGTTCATACCTTTAGGTTCTCCCATGTATTTTGTTTTTGTCATTCATGTCTTATGGTTTACAATTGAATCCGTTGATTTTTGTATTTAGACCACACCTCAGTG
Gma.15390.1.S1_s_at	BG551358		0	No Homology to Known Proteins			GAAATTATGAGAAAGGTTTGCAGCTTTTTGTAATGCCGTTTCACTTTATCATGGACCATGTTTGGATGTCAACTCTCCAATAAAACCATTTCTACT
Gma.14267.1.S1_at	CA850808		0	No Homology to Known Proteins			GAAACAGATTTATTCTATACCCGATAAGTAACAATACGCAATGGTGGGGAGACGAGAGGGGTTTACAATTTTCTCTATGAATATTTAAATAAGTAAATGCAGACATACTCACTTATCACCCCAATGACCCATTCGTAACAACTTTACTT
Gma.11045.1.A1_at	AW100774		0	No Homology to Known Proteins			CTTTATTTTGCTTATCAACTGCTGTAAGAATTTTTATTATATTTTGTAAGTTAGTTTTTGCCCAAAGCGGTTATTTTGATATGCTTATTCAGCCTTCTACAGTGTGTTGGCTTTCCTCACTGTACTATGATAGCATG
Gma.11130.3.A1_at	BQ453096		0	No Homology to Known Proteins			TGTTCACCTAACCTACACTACAAGAAATGAAGAAAGCAGCATGAAAAATGCCAGAAGTATTCTGTTTAGTCCATTGGAGGCTACACAGGCATTTGGAATGGAGATTGTTGATCATCCTTCCTTAAGTCTCGCTCGCCTAACTAGGATGAGTTTTGTTTATTCTTTTTTNTTTTTTTTGCTGCAAATAGCAGGATTAGTGAAGTACTTAAAGTGTTACAAACCCCATCTAACGTCTTTCATTTATTTATTTTGGGAGTACAATTGGAAATGTTCAGAGAATGGAGAAGCAGTGGCTATCGAATGTATAAAAACACTAACTTCTGTTCA
Gma.10921.1.S1_s_at	BQ611250		0	No Homology to Known Proteins			GATTGTTTGAACGTGTGCAAATGTATGCATCAGTAGCTTTGGTTTTTTATTTTTTATTTTTATGTTTAATTATTNACCAAGTTTTAAGGAGTTTGTTGTTAGGTTGTCTGATTGTTATGTGTGAGTAACTTAGCAGCTTAAGCTTAGTTGCTGAAGTTTAGCTAGT
Gma.10932.1.S1_at	BQ612822		0	No Homology to Known Proteins			TTTCTGGCTCCAACGGGCTTCGTGGGTTGGGCTTAGGAAGGCTTGTGCTTGTAATTTTGGGTCTAGTTTTGGTTCTGATGTAAAAGGGTTTCATTTGGTCTTGCTTTATTTATTATTACCATTACCATATGCCTAATAGGTTGTTTTGGGTTGAGGGGGGTGTAGGTAAAGTCACACTCTCCATGTCAACAATGTTGTATGTGAACTGGCCTTAAGTTTTTAGTTTATAGTTTAAGCTATGACAAATGAAATTGTCTTAATTTGTGCTTTTTCGCTGGCCAAGACTTTCTTTTCTTGTTTGGGGATGGTGGAAAACAATGCGACCAAGGATCTGTTCGTTTGAATTGAA
Gma.10981.1.S1_at	BM092081		0	No Homology to Known Proteins			AGCTGCTTGATCAAGTGTTTGTTGCTTATCATGTATATGTTAAGTTAGATGTTGCCTCTCTGTTTAGTTCTTTGTGAGATTTACTTGTATTTTTGGTATTATTTGAAGCGTTCAGTGTTGCAGCCATGTTTCTGCAGTTTTGATGTAGTGTTTACCCCCTGTAACCTGTATAATTTTGCTACGTTNGGTAGGTTAAGTTAGATATGTTTTCTTTGTTTAAAGACTCGTAAAAATCACAAT
Gma.10664.2.S1_at	BQ081617		0	No Homology to Known Proteins			TTGCCTTTTTCTCTGATGTAAAAATTATCACTTCTCCTTTTGTGAAAGAGATTGTGACAACTTTGGCTATAAAGGGGGGCCCCTCTTCCCCTCTATTTTTTCTACTTGACGGATGGCACAGTANNNTAACACCACGCTTGTGGGAAACACTGATTTTTGTGCTGTGGTTTAGTGCTATATTATTGTTATTGTTGTGTATCGTAATTGGTGTAGTAGTGTATATGGACTTAT
Gma.10075.1.S1_at	CA852124		0	No Homology to Known Proteins			ACACTTATACTATCTTGCGTAATATGCAAACTATGTTTGCTCTTTTTAAGTTGTTTTGTGTAATAAAGTTGCCTTTTTATTTGAGTGAGGAGTGATACATTTGTACANNNTCTTATGCTTCACATGGGATCGATTTCATTCCCAACTAACTCCCTTTGTCTGTGAAGGGCTGTGCTACTTCTAGAGCGTGCCTAACATGTAAACTCCTATTCAATGGAGGCATTACTTAATATTCAAACATCCGACAATCTATTTCTTT
Gma.10198.1.A1_at	AW310213		0	No Homology to Known Proteins			CAAGTTAAATGTAGCCTGTCACAGAAAAGTTCTGTGTTGTCATCAAGTTAAAAATCTCAAGTTCAGATGCTAGGCAATAATTTTGATAGACTATATTTGGAAATTTACCGAAAGTGGTTGTTTTTTCTCCTTCTGTATTTTGGAGCATATTTATCATGTATTCATTTGCTGATGATGGTAGTGCCATAACTCTAATTCACGAGAAAGCCCTACCTCTTATCTATTTAACACACCTATTACATGTTATTTCTTGTACGTTTCTGGACATGGTTCTTTGTATTTCCAAT
Gma.10328.2.S1_at	CD412052		0	No Homology to Known Proteins			ACTCCTTACTCATGCCTCATAAAGTCTGTCTTCACAAAGATAATTTGCTATTCTGAGTTCGTTTGCCCTTGTGTGGCATAGTCTATNATAGTCAAATTAGTGTACTTGAATTTGAGTCAAGTCTCCAACTGATAATGGAACTTAATTTTGGATTTAGACTCTACACAGTTTTAACGCTTGAAACCCTGAAACGTTCAATAGTGCTGTTATTTCTTGAGCCTGGAATTTTGTCAAATTTCAAAATGACATATATTGAACTTTGCTACTTGTGATGTTACCGTGACAAGATCACTTTTTAATTGAA
Gma.1034.3.S1_at	CD404242		0	No Homology to Known Proteins			GTCTTCTCTTTGTTAGTCTGTTTTATATTTTATGATGCTTGTTTTTACCTCCTTGGATATGTTAACTGTGACATCGGAGAGGCATGAAGGCTGTCGGATCAATTTGATAAGGGAACTTGTGGATTTTAAATTCTGTTGTTTGTGGAACTTTTGCAGATCACGGTCCAGGTCCAGGTCCCCATTGCCTCCGCGTAATAAAAGCCCCAAAAAGCGCAGTGCTAGCAGGAGTCCGAGTAGGAGTAGGAGCAAGAGCAAGAGTTTGTCCCGGTAACCTCTGATTGTTACAATTGATGAAGTTGTGGATGATGGTGAGGGAGGGCTACCAAGTTTTTTCTAGTAAAATTGACATTAGCCAAAAAAAACATTTGGGTTTTATGTTTGATCTCCTTTTATTGAACT…
Gma.10384.1.S1_at	BE658298		0	No Homology to Known Proteins			CAGCTCCTAGGGTCACGTCAAAGATTCTGTATTTAGTTGTTGAGTGATTGAGTTCAATTTGTTGAGAAACTCAGATGCAAGGGTCAAGAAATTGCAATAGTTGACATTTGAAGAATTTTAATGCTGAGGTTGAGTATCAGGGGCTACTTGCAACAAAATGTTTAAAATTTATGATTGCAACAAAATGTATCACTAGGATTNNNTTNNGNNNNNGATAATATGATCTGATGTACAAATTTTCATGGGATAAAAGTTTTGTCAGGCTGTCCCGAATGAACGTTTTATGAGTCACGCTAGCTGAACAGTTCCTCAAGTTNTATTTGAGACTTCTTATTTGGTTAAAACTTGTCAAATTTCCTGATTGATGATGGGGTTTTCATTGCTTGCAAATTTAAGACT…
Gma.1132.1.A1_at	BQ253380		0	No Homology to Known Proteins			GAAGAACTTCACTATCATAGTTGAGGAAGTTAGAGATTGCTGAAGCTGCTTTGAGGATTTGTTAATAAGCATTATTTGTCTCCAACTTCACCGTACCAGTAGAAAAGGGAAAGCATTCGCTTTTTGAAGGACTTAGTCTGTGTATGCTGACTCAGATGATAGTTAGTTTAAGCTGTGGGTGGTGAGAACCCTATCACCAGACTGATATAAGCGAATATGCGTCCCCCTTATGTTTTCTCAGATGTGTTTCTGTAGCTCCTGACTTTTGAATTTTTTTTTTAGTTAGCAATTGCTACATGGTTAATAAATGCCAGAATATGCATGGACCATATAATTAACTTGCATACTGGGGTTGTGTTTATCCATTTCATTTTCTGAATGTAGAATGATCAATTGAGT…
Gma.11646.1.S1_at	BG652019		0	No Homology to Known Proteins			GAACCCGAGACAATGCGATGGACGATAATAAGTGGTTGGTTGGGTTGGGGTTGAAAAATCACGTGGTGGTGGAACCCATTTGTCGTCAAACTTAGCAGTTGGTATGTGGGGTGGGGCTCATCAAAGCACTGCTCCTTTCCATCTAACTTCACATTTCTCTCGTGCANGTTTATGGTGTCGGTGGATCATATTATTATATTTTTAGTAAANGNATTTTGGGGATAGCTTCTGCCTCTCAATTCTCATCTCTCGGCAATAAAGTTTCAATTGTTTCTGTTTGGCGAGCCTTGGTTTAATATGCGTCAAAGTTTNTATGTCTTAGATAGTTATCTTCTTTACAATACCCAACCAAAAGGGATTACATGTATACCTTTTCTCTGCCTACTGGAAGTATCTAAC…
Gma.11430.1.S1_at	BE659510		0	No Homology to Known Proteins			TTCGCTATGGCACCAACATTCAAGGCCTTCGCTCTTTTCCTCCTCCTCGCTCTCTTCTCCGCCGCCTCCGCTCAAGAATTATCCCCCGCCTCGTCTCCGGCACCGTCGCCTGAAGCAGGAGCCGCAGACTCCGTGCCTTGCTCCGCCANCATGATCGGTGCCTCGCTCGTTTTGTCTCTCATGGCGGTCTTCAAGTTCTAGGATTTCTTATTTTGCATTTCATGAATGAATTAATATTCCAAAATAACATATATAATAAACTTGAGANTTTCCACGTTACCACTTCAGAGTTTATTTTATTATTTGTTGTAGGTCTTATGGTGAAATAACAGGGATTTTATCCTCTCTACATTTTT
Gma.12410.1.A1_at	CD391850		0	No Homology to Known Proteins			GGAGAAATCTCCTTCCATATAATTGTTTGCACTCATGGCGTTGGGAAGGGAATGCGATTTGAACAGAGATTGCCTCAGGATTAACAGCCCAAGTATGNNNNNANTCAATGTTTCATAAGTATGGCTTCTCACCAAAAGGAAAGGTGCAACTCGAATGCACAAGCTCAAAGCTGAATCACGTTTCTGATAGAGAAATCGAATGATATGCCTTGACTCCNACTTAGTAAACATGTAGATATGCNATGTGGTTAAAGAAAGGCTTTTTAGTAATTTTATTGCATGATTTGGCTGACACGTTATTCTTTTTCCAGTGCAATGGTGAACACATCACACAT
Gma.12242.1.A1_s_at	AW310746		0	No Homology to Known Proteins			GAACTGTGGAGTCAGCAGTTTCTCCAGGTCTTAGTTCACAGCTTATTGTTTGGTGCTTTGGGGCTATCCTTTTGGAGGAAAGTGCCCATTNTTGCCAAGACTGTGTTGTCNCCTTCCTCCCCTTTCCCTTTTGTGGGCTCCTTTTATAGTCTCCATGTATGTGCCAACTTATTGTTTCATGGATACAACTCTGTAATATTTTGNTACCTGTCACATAGACGGGTATGTAGGGTCGCCAATTGCTTTATTGGTAATTTTTGGTGAGGGATGATATAAAAAATTTTGTTTTTTTTACATCCTTTTTCAGTCATTATTTTTGGGTTGAGAGTATAGTCCATGAGTATTGATGAAGGCAT
Gma.12314.1.S1_at	CA819508		0	No Homology to Known Proteins			GTGCAAAATTTGTGTGATGTTGTCTATGTTAAAACTAATCTTGCGCTGTGTTTGCTATTTCAAGCGTGTTTTATTCTTCAGACCAATGGACGTGTTTTTCACTTT
Gma.11871.1.S1_at	CD409660		0	No Homology to Known Proteins			TGCTTCTTTGGTGGTTTATGGAGACTATTTAATGTGAAAGATTTTGAAAAGATGTCTGGCCAACTTTTTCTACTTGGCTATCTGGCGGCGCTCAGTTATCCCATTTTTGAGGGGATAATAACCATGAAAAGCAAGGTGCAATAGTAGTTTGTCAATGATTAGGCTAATTTAGGTATTTGAACTTTGTTCACAAATAATTTGCTTCATATGAAAATCTAAAGTGCATGCTAAATGTTTGTATCTTAATATGTAATTAGCGTGCTTTTATTTCATGCATGAGAATATGGCTATCGATTTTAATTAGGAGCAAAATGTATGTTCTTACTCCATTTTTAATG
Gma.1189.2.S1_at	BQ453094		0	No Homology to Known Proteins			ATTAGCATAATTTTTCCCCTCAAATTACCGTTTGTTTCATCTCGTTTGTCAGGGGCTTCGTGGTATAATATACACAATAATGAGATATACTATCAGGTCCAGTTAATTACTGGAATCTTTGAAAGAATGATAGCATGCTCTCTGTATTGAAGATTGC
Gma.12030.1.S1_at	CD399012		0	No Homology to Known Proteins			AGAGAGAGTTTCTGATAGGCGCCCCCAAGTTANNANCAATGCTCCAAGAAGACAACTACGAAGATAGTCATTGTCACCTATTGGTAACATCTCTTCTAGAATCATAAGCATTTGGCCCGCTTCAANNNNNNNTCTTTCATGAGAAATACTTCACAACTTTCTTTGCTGCTGACTTCAGTGTAAATGAATGGCTTGAGACATGGTCGAATCTTCAGAAAGTAATGTTCTCTCAAAATATTCTCATAATTATTTGTCAAGAGTCTGAAAAAGCAANGCACTTCATGGGATTAACATGGCCA
Gma.1209.1.S1_at	BQ629459		0	No Homology to Known Proteins			AGAAATGATCACTAGCAGGGCTAAAGCACCCTTCCCTTTAGAGAGAGAAATTGTGACAACTTTGGCTAAAGGGGGGGCCCTGCCCTTGTCCATTTTTATACTTGACGGATGGCACAGTAATGTAACAACACGCTTGTGGGAAAACACTGATTTTCGTGTGTTTTAGTGCTATTGTTATTATGGGCCTTCCCTTGGAGGGTGTATGGACTTGTTACAGAAGAAGGGAAGGGTGATATCTTGGTCGGATGTAATTTAATGTGGTTGGTGCTACTGTTGTCTTTTTGCCTATGTAGTTACGTCGCATGCACGCATTTA
Gma.1358.1.S1_at	BQ295834		0	No Homology to Known Proteins			TTCTCCTGACAACTAATATCAGCTCAGTATTTGTACAGATCTCCAAAACAAAAAGAAAAAAAGGAAGAAAAAGAACAATTGCATTGTGATTCTTTGCTATTAGATTTATTGCAAAATGCTGCAGTAGTTCAAGACAAGCATATGATTGGTCGGATCTCTGCCAGTGGCAAGTAACGACGTTTGGCTGAATTAGTTATGTACATTGTTTATGAGTTGATTTGTGTAAAGCATTTACTTATTCAATGGTAGTTGCTTTGTCATGTTTTTTACATGCACAAAAGATGTTTTCCCTGATCTCTCCTATCATTTGGTAACTTTGGTTACACAGTTACTTTTCCACT
Gma.13580.3.S1_at	BI973761		0	No Homology to Known Proteins			TACACCACCCTGCATAGTTTGTTCAGCTATAATACTACTTGAGCTTCTTTACCTACTTTTCAAACCTACATTGCACACAAAATGGCAACATCTTGGTCATGTTATCTACTTGCATTGCTTCTTTTTATGTCAACTATTGTATCAGAGAGTAGAGTGGCAAGGAAGGACTTGGGCCTGGACCTTGGTGGGTTGGGGGTTGGACTTGGACTGGGTTTGGGCCTGGGNATAGGAGGTGGCAGTGGCTCTGGAGCTGGTGCCGGAGCAGGGTCTGGTTCTGGTTCTGGTTCTGGTTCTAGTTCCAGTTCTGCCTCAAGTTCAGCTTCCTCATCTTCCAGT
Gma.13747.1.A1_at	CD404869		0	No Homology to Known Proteins			GTTTTTTCAATCTAGATACACCTATATTCTTGTAAGAATTTGTCTATGGGCTGGTGATGCTCCTTAAATTAATTTCCTGTTAGGCTTTGATGTTTCTAAGTTCTTCTGTCTTGTGAAGGCGTGTTGACATCTCACATCGGTAGGGTTTATGTTTAAAAGTCTCCTTGTAATGATTTGGGCCATCATATCCTCTTCAACTAGTT
Gma.12555.1.A1_at	CD391198		0	No Homology to Known Proteins			AAGTCGAAACCCAATGCTACCAAGAAAGATGATATCAAATACAGACCAGACCACTTTTTCAGGTCAGCTTCCACCAGAGAATTTAGATACTTAAAAAGGGAGGAACGTTTACTCTTGGAAATTGATGATTAGGCTAATACGAGAATATGTAAAGGCCCATATGGTTGTTTTTTATTTTAGTCTTTGATGTATTCTGAAAAGCTCTACACATTCTTTCGCACTCTTGGTGTGGTCTGATTTGTCAACCCATTCTCCTAA
Gma.12687.1.A1_at	CD394817		0	No Homology to Known Proteins			TCGCACATTGATGTCCATGAGGTGATTGGAATTCTCATTCACAGGGCAGAGCCAGAGAGCAAGGGGTATTAGAGTCATTTTATTCTGGACTGAGTTGATTCGCTTCGCTTGCGTCTTAGGGCTTGAAGGAGCAAGTTATATTCTCTAGTTTGTTTTTATTTTCTTTCTAACTTTCTTGTTAGAGGTTGTTTTTTGATTAGGTAGTGTTGGTTGATAGATATATCCGTCATTCTTGTGATGGTTAGTGATTCCCAGCACCTGTTGTACA
Gma.12721.1.A1_at	CD395611		0	No Homology to Known Proteins			CCTCCATCTGCCGTAGTAGTCATATCTGGTTGGACCAGGATTGTCTCCATTGAGTCTTTTACCCAAAGTCCCACATCCTTTCAAAAGTTCAATTCCT
Gma.3355.1.S1_at	AW101624		0	No Homology to Known Proteins			GTAATGTTGGTCATGCAACTTTGGGGATCAATCTATTTGTATAAGGANNNNNNNNNNGTTATGAACGAGTTTTGAGTCTCTGTGCATATCTTATACGTTGTAGCTTTTTCCTTCAGGTTTCAACACCATTTTGTTGTATTGCATTATCTTGGAACCGAGAAGAGCATGGCTTGTAAATACGCACCTCACTATTTGTCAATTTTTGTCTGCTTGTGGATACATTCAA
Gma.3406.2.A1_at	BQ628046		0	No Homology to Known Proteins			AGGTATTTAAGATCCGGACGGCAATTTGTTTGCATAGGCACTTGGCATGATTAATGTTTTTTTTCCTTCTTTGATGAGTCGTGTGCTTGTGCCAAGTTCAAATGGTGAGCAACGAGGAGCTTGGTTTAAAGGTTTGACTAGTTAATTGATGTGTTCAAATTCCTGAAAATGTTATCTCACTCACGATTAAGAACTATACATGGANNNNCANCTGTTCAATTTTTTACCCTTCATTAGTCATACACTGATGTTGCTTGGAATGATTGTCGATTGAAGTTTTACAATCAACTATTCCTTTGCATAGATGATGTTCAAATGTANNNCGAATTATACTTTCCTGTANNNATATGCAATTCACATGTCATTTGTCCTAA
Gma.3256.3.A1_at	CD394799		0	No Homology to Known Proteins			GAGAAATAAACTCATCATGCTCATCACAGTTCACCTGAGTTTAGGAATAGAGATTTGAGAAGCCCGTAGTACCCACAGTTGCTTCTTACTGTTGCAAACAGACTATGTGGATCTTGTAGCTTAACCCCTGAACCGATGGTGGATTGAAGTGCAAGAAAATGGGAATTGGCTTCCCGATCATGCTTTTTGTTATGCTCTCTGTTGACCTTTTAGATTATGTGTTTCTTCATCTACTACGGATTGCATGTATCAGATATATTAATATATGGCAGATGGTTGTTTATATTT
Gma.3594.1.S1_at	BQ613138		0	No Homology to Known Proteins			GGCTCCTTCACCGTCGTTGCTGGGACCTCCTGCGCCACCCACCGGGGCTCCTGGTCCTAGCGAGGACGCTTCTTCCCCTGGACCTGCCACTGCTGCCAACGATGAGAGTGGAGCAGAGACCATCATGTGCTTGAAGAAGGTTCTAGGAGGCTTAGGTTTGGGTTGGGCTACCCTTGTTTTGGTCTTCTAGACAGGCTTTGTTGCTGTTATTATATTCTTGTATTGTATCATTTATTTTCCTTTTTTGTTTCTTTTTCTTTTGACCCTGTTTTGGGTACACATTACATTTATTTACATTGTTACCTTCAGACCCTTATTATTCGATTGATGTCGTTGTCATCACTAGTGCTACTGTGCTTGGCTTTTTGTCTCGTTCGTTTTGGGTTTAGATCATTATTA…
Gma.3839.3.A1_at	CD396897		0	No Homology to Known Proteins			AATTCTGAGTTGGAAAGTGTGAGCCGAAACTCTTGCNNGTCCCTTCGGTCAAATCTGTTTTGATTGGGAAAATGATNCGNNCTCCCTCTTCATTTTTAGGCCTTTTTTGTAATCACAATGTGTCGATCTTTTTCCAACGTCTTCAAATTGTAATCTGATATACATTTTAAAGAGAATCATAGGGTTTTGTATTAGCAAGTAAATGATTTCTACAGACAATTNATAGATAGGGAATAATTGTCCCTCAGCCATGTATGAACGACAAATTT
Gma.3872.1.S1_at	BI967563		0	No Homology to Known Proteins			TTACACATCATACACCTCTTACACTGACTCCTATTCTAATTACTACCCCGCTTACTATTCTGGCGCTCCTCCCCCTCCCCCNCCTAGACCCTTCTTCGACCGTTACGCTGGGCCCAGTGGGCCTTCTGCTCCGCTTGATTACTCCTCCACTTATGACCCCATGCCCAAGCCTCCCAAAATGGGCCTCGGCGCTGGCCTCGCCATTGGCGCTGTTGCTGGGGCTCTCGGCGGGCTTGCTCTCGACGAGGGCCTTAACTACGAAGAGGACAAGATCGCCGAGAGGGTCGAGAACGACGTCGCTGCTGCTGCGCGCGACGATTACAGCGATTACCGAGTGGATTATTGAACTCTCACTACTACCGGTGTTGTCTTGAGGTTTGAAATTCGAAGGGTATTTCG…
Gma.3112.3.A1_at	BG839772		0	No Homology to Known Proteins			GGTGAATTGGTGATTGGTGACTATCNTCCAAGTAACACCATTTTCACTCATTGGGGTCGAATAGCTTTTTTTATCCTTTTTTCATAAGCTTGGCTTATTAAGGTGTATGTACCTTGGTCCATCTTAGTNACAGTGCATGTAAGACCATATCTATTGTGATCCCCACAATTCTGTAACGTGGGGGTGCCCTACTTGT
Gma.2991.1.A1_at	CD391207		0	No Homology to Known Proteins			GAGCTGGCGCAGGTACCTTGGTTTTGTTTTGCATTTTTGGTCGTTTGTACTATGGTATTGAACTCGTCCAGCATTGAGGCACAGGCCTCTTTCGCCATTTCTAGCTTTGCTCTGGAAATTGCTACTTGTTATACTAAA
Gma.284.1.S1_at	BI946253		0	No Homology to Known Proteins			TTGTATACCTTGTAGCATTTTTGGGTTTTGTGAGACCTGGAAGTGGAATTACAAGAGGGTTTTTAATTTGTGAAGAACTGGTCTTTCTGCTCAATAAAGGTCGTGGTATATTCTTAGCTTCATTTCTTGTTGGTTCGGNGATAATTTACTGAATTAGAATTTTAATTGGTTACATTGTTGGGTTTTTCTGTTTTGCTTCAATTTGAAGGATGAGGCATGCAACTAAATTGTGTCTTGTTCGTTTTGAGGGTCATGGTTTAGGCATCAAAT
Gma.259.1.S1_at	BI943015		0	No Homology to Known Proteins			ACGTCGAAAGCTATCTTGTGTTTGAGAGTAATTATTAGTGCTGCTCGTGAAGTTGCTCAATTGGGCGTTGATATTGTGGTTATGCCTGCTGATGATATTCTCCAACATGCTGTTGATATTGAGAAAAGCCGTTTAGGCTGTTCTTGCTCATATTTTGTATTCATTGTGGTTTGTTGCTTTTCTAATGTATCCAGCGATTG
Gma.2615.1.S1_at	BI317766		0	No Homology to Known Proteins			GGGTGCTTTTATGTTTCCACTAGTTTGACTACGATGTAATATCCTAGCATTACTGTAAATGTTCCTTATGGCGCGTTCATTGCTTGAGAAAAAA
Gma.2616.1.S1_at	BI317777		0	No Homology to Known Proteins			AATAATGTTTTGTTACACCATGTAGAATATTGCTGAACAGTGCAAATAAGTTTGTACTAATCTAATCACGAAATAACGTGGTTACATATTATTGGTGGAATAATAAGTTAAAGAACAAAATAAAGTTGAGCTGACGGGAAATCAAGGCAAGATCATTCGGATTGAGTTTCATCAATAAATTGCTGTACCATTTAGTAATTTCATTATATATAAATAGCGGTTGGAT
Gma.2364.1.S1_at	BM270501		0	No Homology to Known Proteins			TATAACTCCGCATGACTTTTGGTATTTCTTTCCTTCATAAGCTAATTATGACACCGTGAAATATATTTAGTGACTTCGTATAAATTGACCAAATATAGAGTAGAACCTATAAGACTACGGGTAG
Gma.2143.2.A1_s_at	CD390563		0	No Homology to Known Proteins			TAGGTATAACATGGAAGATCTCGTAAACTATTCAAAGCTGTGGAAGCTGAAGTTGGCNATTGCATGGATGTGGATTTGAGGATACCTTCCAGTCTGTTCTGTTTTGTTTTTAGTCTNGGAGGTATGACAACTATTCTCGGTGTTATGTAACAAAGTCTGTTCTATTTTTGTAATTCTTTTTTTATACGCCGTTTTTGTTCTTAGTTGGGTCGAGATCGATTATTATGCCCTTT
Gma.2148.1.S1_at	CD406397		0	No Homology to Known Proteins			GCTTCCCACCAGTTTTAGGAGCATGTGTTATATTAGTTCATGTCATGGGTGTTGAATGTGTTTGATAGCTACCTGCTGCCACTGAAGGAAGAGCAAATATATAGCTTTCTGCTGCTGCTGGAGCTTTAAAGTGTGATTGTTTGACTTTGATGTCACTTGCAAGCCATTATATCTCCCGTTACGTCATACATATCTGGTATTACATTGATATTTATATCTTTCGTTTGTTGAAACTCGCGAAAATTCTGAAGCCATAAGTGGTCCCTATGGGGTCATTAAGACTAATTATACAGGTTACAGCTGTATAAGTGGATATTCCTGTCTATTTGGACCTGAAGTTGCATGGAATTATATTTGACTATTCCATAACGCCGCCGCCGCNTCATCTTCCCTTTCATA…
Gma.17999.1.S1_at	BI971315		0	No Homology to Known Proteins			ATTGTTTTTGACAGTGTAGGGTTCTGTCAGAGTTAGACTTGACTTGATGTTTCTTTTTGGGAAATGTACGAGGATAACTGGTTCTTTATAGGATTGGCCCCGTATGATTTGGTGATGTTGGATTTATAAGTGTTTAGTTACTTATTTACTTCTCAATTGATTCTCTGTGTCATGAATTGTGGCTATAAGACGTTGTTATTTGACTTCTCAATGGACTACTATATTGGAGAGAGAATATTAGACAGTCTTTGTCAGGT
Gma.18044.1.S1_a_at	AW757140		0	No Homology to Known Proteins			TGAGAAATGAGCCTGACCACTATATATCCTCCATGGATCGATGACTGAAATAAAATATATATAGTAGTTTGTTTTTCTCTAGCCTTTGCGGATGATGCTGTATCCATTTTTGTTTATGTTAATTTTGTGCATATATATAGTATATAGTATATAGCATATGTATGAATATGTTTACGAGTTCATCAGTTGAGCGATTGAAGTCCTGAAACGATCGAGGTAGCTGTGTGTGGTTTAACAGCTTGGTCTTGTTTTAT
Gma.191.1.S1_at	BI945387		0	No Homology to Known Proteins			ACTCATTCACATGTTTTGGGGCGATTTTTTTTTTCGGTAGTCCTTTGGTAACCAAGGAAGTTTGTAGAAAAAACCATCGATGTCACTAGCTGTAAAATGTGAGTCAAGATGTACAGATAAGGGCAGATCCCATGCTACTCTGAAACATGAATGATCAATTCTGTCTTGTGAGTTTTTGTAG
Gma.17689.1.A1_at	AW310928		0	No Homology to Known Proteins			TTACTCAAATGGTCGTGGAGGTCGAAGTGGTGGCAGAGGAGGCTACCAAAANGGGCGCAANCAATANTANGATCANCCTGGAAATTATTATCCAAGGAACAACTATTATAACAACAGAGGAAGNGGNGGCAGAGGTGGTGGCTATTACAACAACCATGGTGCNGGNGGTCAAGTTAATCANGTCGCAGGTGATGTGGGGGTGCAATCATGATAAGTTATGAGTTGTTTATAGTGGTTATTACTGTCACTAGTTGGTGGTGAACCATTTTTTATNCNCCTGGCATGAAAACATGTTTTGAACAATTTTGTTTGACACTTGAANGTTCAAACGTCTAGANNNCTCCACTATTTTGTAGTCCAGTGGCTAGTGTGGNCCTTTGTCCGAAATCTCACNNNNNN…
Gma.17900.2.A1_at	BQ610408		0	No Homology to Known Proteins			TTGTTCCGTGTTAACTGTTCCATCTAGGTTATGCTTCTCCTTGCTAGACAAGCTCACTGGTTTTTCTTATGCTTTGATAAACATTTCAATTTGCCTTATATAGCATGCATGGTGGATAGTCCAGTGGAATTGCCTTGTGAGACGTTGTTGCTTGTTTTGGTCCTTCCATGTTTGGGGTTTGAAGGTTGAGGGCCTTAAACTATAGGTGGTGATAGGAACACGTGAAATGGACAAAGAAGGTGGATCCAAGTGGTTTGGATCTCATAGCATTTGTATTTATTTTTCTTGTTTGGTCTTCAATTGGAGAGGCCGCCACCACAAACAATGGCTCGGGCAAATGCTTCTTGTAGGTTTTGCACTTTCCCAATCGTTAATACGA
Gma.4892.1.A1_at	AW310404		0	No Homology to Known Proteins			GTTGATACTTACTCCAAGCCTACTAGTTTTAACCACAAGGTTGTACTTGATGTGATNNNNNCNCTTATAATTNCGATTCCTTCCAATTCGGCTTTTAACCTTCTAACAAGACTGAGGNGAGCCTAAGTATGATATCATCAAGGTTCTGGAGGCAGCAGTTGAGCTTTTAATCTAGTTGGAGGAAAACATTGTGGGTGGGACAAACTGCCAGGGGAGTCTGAAAAGTAGGTTTGCTTGGTACCAAAAAAGATTAGATTGTAATGAATTGTGGTTTGCCTATATATTTCCTCAATGTCCATCAATGGGCAAATATAGCTTGCAGTATTGTAATTCAGGCAGTTTGTACCCTTTTTTNTGGTCTACAGGCAGAGGTGTACCTAA
Gma.477.1.S1_at	BM308020		0	No Homology to Known Proteins			ATTACTACTTTGTCTCTGCGTTTATTCTTTTGCATTCCATCACAGCATTATTTTAATNTNTTAATGTTAAAAAGGCAGGCACCGGTTGTAATTTTTATTTATTTTAGGGTAGGGGAATGTAAAATATTTGTTGGTTGATCCCACGAGTCATTGTTTAATTATCACTAATAATTCTGCTTTTTAAGTCAATTGCTCAAG
Gma.5036.1.A1_at	BM526476		0	No Homology to Known Proteins			GGGTGATGACCAATCTTTCTGCTAACTTGGCAGAAAAGATGCGGTTTCGTACAGGAGGAGAANCAGGGTGAAATGGGGGGAAGGAGCAAGAAAGGAGATATCCCATGATATCTGCCAATACCGTAACTATTGGGCTTGCATGAGTTATTGAATGTTTTGGAGTCTATGGTGGTGGTCCAGATATTATGTCCTTTACTATTTTTTTTTCCTTTTACTANNGGCNGTAGAGTGAAACAATCATCTTAGTCCATCCATGTGTTTGGGACAAGGTAATGCAACATATTTTAGCCGT
Gma.4808.1.A1_at	AW317160		0	No Homology to Known Proteins			TTGTCACAAGTTTTCTCCGATTCCATTCCAACCTCAACAACAACAGACACACCCCATCCACTTCGATCATCATCATCTCCCATTAATCTCTTCATAATCCCATATGTTCCACTTCCTAATCCCACAATTGCACACAACCTCGTTCTAATCTCAAACTTTTCAACCCTGGGTACTCTCTCTCCTTCCAATATTCCTTAGCANCNCATTTATAAAAACCATCCAATTATGTAACTCTACCCTTTNTAGTAGCATATAAACTCCCCCCAAAAAAAAACCAAAAAAAAGACTTTTTTTTTATCTTCATCTTTCNAACCTCAAAGTTTTCAAACCTGGGTTCCCTATCTCCTTCCAATATTCCNNNNCNNNNNATTNNNNNANNNCNNCCNNNTATGTAACTAT…
Gma.5148.1.A1_s_at	BI971116		0	No Homology to Known Proteins			TGAGATGTATTGCATGTTTGACACATGACATAGACATGTTAGTTGGTTTTCAAGTTGAATTTCACTTTCGTCAGTGAGCCATGTTAACTTATAATTATAGGTGTGGTTAAACAAATCAATCTGCAACCAGTTCATTAACTTTT
Gma.4959.1.A1_s_at	AW310425		0	No Homology to Known Proteins			TTTTTATTTCATTTCCCTCGTATCATACGAATGAAGCTCTGCTGCTTGGAGAAGTTACTTTANGCCTCCTAAATGCAGAGAGATAGTGCAGAGTGTACAGTGATTTGAGCGGGNCAGNCCACATTTGAAATGGGTGTTGAAATGGTTGCTTTGTAAACTGATTTATTGTCTTTCGGANTGTTCNAACTCCNGAAGTGTTGGGAAGGAAATGATGGACAGGCCTAAGTGTAAGCAAACTGTGCTGTAATNTTTTCTTGATCTCATTCTCATATGTTCAATTC
Gma.499.1.S1_at	BM521834		0	No Homology to Known Proteins			TTCGTGATCTCTGAATTTCAATTTCAAAATTCATTTTACAAATTACTACAAATTTGTTTTGTTCCTCCTAGTCCTAGCTAGTAGCAAAATATAGGTTGTTCAAAAATTATCCATTCGTGTATTGAATTTTGGCTATTCTTTGGTCTATTGCCCAGGGAATCCTCTATCATTCTGCTTGT
Gma.5318.1.S1_s_at	BM092330		0	No Homology to Known Proteins			GATTATAGATGTCTCTGCATCATGCTGACTTGGTGCCTGTTAACTGTAATGTGAAAATACTATCTTTTTTATAAAATGTTGTTATATGTAATAAAATCCAACCCTCTCGTGATTCTCACGAGTTTCCCAGACATCTAATTTGCATTGAG
Gma.5256.1.A1_at	CD408042		0	No Homology to Known Proteins			AAATGCCTCTTGTGGACGTGTGATGGAGGTCACATCTGTTAATTACAAGTGCTGTCATGGTGGTAATGTTGCTGACCATGCTATTAANNNNNNGNCNNCANCCGCAACCTAAAGCTTGAGTCATTCAACCAGGCTTGTTTTGGAGAAACATGAACTTGAATTCAAAGTGTGTTTCTTTTTTACTATATATATGTATGTATGCCTAAACAAGTGCGTTGCCCCTTACGGCCACTTCATTTGTCCTTGAATGGGCNAANATTANATAATGGCATCTTTTGTATGTTCTGA
Gma.5595.1.S1_at	BM139888		0	No Homology to Known Proteins			ACAAGCACAAGCATGGGAAGATGAAGACTAACTTGAGGCTTGGGATAACGGAGTTGTTGGAGGATTTGGGTGCTGAAGATGATGAGCATGTGGTGGTNNCTTTGNTGCCCAAGTTTGGGAAGGGGCATGTCATCGTTGGTGGGATCAAGATAGAGTTTCACAAGTGAGGATGGCGATAGTTAATTGAATTGAAAAAGTTTGAATGAAATTAAGCCATATGCTTGCTGGTTAATTTCACTGTTCATAACGAGGTTTGCACTAGGTTTGAAAAATGATGGTTGGATAAAAGACGTCCTTNGAGTACCAAGAGGTGAAATCGTATCTAGCTATAG
Gma.5535.1.A1_at	BF424135		0	No Homology to Known Proteins			GGGCATGAAAGGTATCCATCCACATGTTTTTACTTTTTTTTTTTCTTTTTCTTATTTCACTTGAATTCGTTTCAATCCATTGATTAAAGCTGGCTTCCCCCACTTGCCTTACAATTCCAAAAAAAAATTGGTGTGCTAATTTTGACATTGTGATGACTGATTGTGCCATACTATTGATGTATTATGATTGTACTTCATGAANATATAAGAAATACTGCATCTCTTTCT
Gma.5387.1.S1_at	BM093934		0	No Homology to Known Proteins			CTGATGGATAGTTTTTATGTTTGACACATGTAGATTTCTTGTCTTTCTGTGGGATTTATGCTGTGTTGGTTGTCTGGGGGAAGTTCATTCTTTTTCCAAGCCTTGTCCTAGCTATGGATCCACATCGGCATAAGCTTCATATGAATGGGGTTGAAACCATAATCTCCTTTCCACCTTAATACTATGGAAATGAAAGTACTTCGACATTTGCACCAAAAA
Gma.5469.1.S1_at	AW349200		0	No Homology to Known Proteins			AACTCTCAGCAACATGCACAATCCTCCCCCGCCAGGCGGTCCAGGCCCTCACCACCACCCCGGCCCACCGGCTCCGCCACTACATGCTCATCCATCTCCTCCGCCTCCTGGGCCTCCACACCACCACCACGGCCCACCCGGCCCACCGCATGCTTATCCAACTCCTCCGCCTCCTGGGCCTCCACACCACCATCCCGGCCCACCCGAACCAGGCTTTCATCAACACCATGGCCCACCCGGGCCACCGTATGCTCATCCAACTCCTCCGCCTCCTGGGCCACCGGGACCTCCCCCTCCAGGGCCTCCACACCACCAACACCACCGTTGCTGATGTAATGCATATGGAGCTTATGAATAACGATCCTACATATATATGATGTAATGTTGAATGCTTTTTAA…
Gma.5788.1.S1_at	BQ452881		0	No Homology to Known Proteins			ATGGTGCTTCCACATCAGATACTGGAGTCAAGCATGTCATCATACCAGCAACCTAACACTGTTTTTCTTGGCCAAGAGCAATTTGATCCTTCTTTTGATATATCTACCAAAAGTGATGAGGAATTGGTTAAGATTGGTGGCGGTAATCTGTGATTTCGTGTAATATGTAAGGTTGTGTTCTAGGACTGATTCTATCTTCCTTCTAAGCTTAGTTTGTGTTATATGTATTCCTTAATAGATGAGGGAACCTGATCTTCATAGATTCCTAAGGTTCTTAGTTTTCAGTTCAAATGTTCAACACTTGACTAAACATCCAGCCTTT
Gma.5653.1.S1_at	CD404693		0	No Homology to Known Proteins			GTTGATTCCAGTGCATTCTTGTGAGCAGACGACAAACGTAATTCTTAGGAGTCATCAATTGTTAGAAGGTTTGCATCCTAAGATTTTTTAATATCTACTGGAAGCGAAGTGATTCATAGAGATGTCTGTTGAAAAGTTGCTTCTGATTATAGACTTGATGTCCATCGAACAATATAGTTTCATTAGCTTATGAGCACGGGTGGCAAGGTGTGCGGTTGAAGGTTTACTAGCAGCTATTACTATAGGCATGCAACGTCGTACAGCAAATAAAAAANTTCAGCTTGTCACCTATAAGGATTTTTATTTTTTTTACTAGAGCTGGCCACCTATAAGTTGGTTTCTATCATACTCTGTTTCTTTCCTTCATTTCATGAGCGTAGGGGAAGATGACTCCTGAGT…
Gma.6296.1.S1_at	CD400030		0	No Homology to Known Proteins			GGATGGATTAATTTGGTATTCTCTAACTAGGAAGTG
Gma.6165.1.S1_at	BQ611864		0	No Homology to Known Proteins			GTACATATGCACAATATATGTTTGCTTTATGTAATCCAGCAGAATTTTGTTGCCCATCCTCTGTATGTTCTTTACTGAGTGTAAGAGCTGAGGTTTCTT
Gma.6015.1.A1_at	CD395399		0	No Homology to Known Proteins			ATAGACATGCCCCATTACATAGAATCCTAAGCAATAAATAATCACNAAATAACAGGAATTTAGAACTGTGGNTAAAGGAAAATATATCTGCATCATTTTTCACTGGTTTTTCACCATGTGAGTGGGATGAATTGGTGACTATAATTGCACTTTGATTGAGCCAATTGGCTAGTTGTTTTCTCCATCTTATGGTTTTGTCTTTCGCTAAGGTTATATAC
Gma.6515.1.S1_s_at	BQ627548		0	No Homology to Known Proteins			TACCATCCTAGCGAGGTCTCTAATCTTCGGATTCTCTCTCTCAAAGATTAATGCGCCTATTAAAAGTGAAAGCAACTTAGTCATTGAATGTTCTTGTTTGCAGCTTTTGTGACAGCGTATCACATATGACAGACCATGAATTTAGTCAACTGTGCTTTTATC
Gma.6770.1.A1_at	BI700473		0	No Homology to Known Proteins			TTTTAACACCTACCACTTGCATTGCCATATTGATTGAGGAGTATGTTCTGGATCCTTAGCTCTTGAAGGCTGAAAGAAAGAATATCGTATGCTAACAACCAGGCAGCGAAATGGCTGGAGCATCATACTTTTGCAATAGTGAAGTCCAGATATGAGTTGCACATATCCATGTATCATTTATCTGTTGATAGGTGAAAGAATCAACTGCACATTGCTGGTTTATTCTTCATGTGATTGGACGTATTGAATCCAACATAGTGATTGTTCTTTTTGATCAATTGACGGAATTGTAACTTTTTTAATCCATTTACTGTCTTACCGCTCTTGGATTCTTTTTTCCTTCTTTTTAGACTGGAAATACCNNNCGAGACCTTGTATGTGTATCCGAAAGCTGTCTAC…
Gma.6814.1.S1_at	CD397900		0	No Homology to Known Proteins			GTGCTGGCCACGCCGCAGAAGTCTCCTTCGCCGGCGATTTCTCCTTCCGCCGTGTCACCGTCATCCTCTCCTCCTGCTCCGACGGTGAACGCTCCGTCTCCTTCGCCTACCTCCGTCGACTCTCCGCCATCTCCTCCGTTGTCTCCCTCCGATTCGCCGGCCGGTGTTCCCTCCGTCACTCCCTCAGCAATCTCCTCTCCGCCGTCTGAAGCACCAGCTCCCTCTCAAAACGGCGCCGCTTTGAACAGATTCACTGTCGCTGGATCTGCTGCTGTTGTCGTTTTCGCTGCTGCTTTGCTTATGTAGAGACTAGAGAGGGTTTCGTGGAGTTTTTTTATTTATTATTATCATCGTTCCGAATTTACGCGGATCGTGAATTCTAGTAATT
Gma.6681.1.S1_at	BQ299091		0	No Homology to Known Proteins			TAGGTGTGCCTGCCCTTTCTTTTTTCCAATTCCCCCTTTTTTTCATATTCTTATTTCATGAAAACCACTAAATCCCTTGTAATGTGGATAATTGAAATGAAAAAAAAAAAAAGAGAAATTGAATTTGTTTTAAAATTAGATTTGTAGATCCAAATGTAGGAGTGTTTGGGTGGGACTAATTATGATTGCTATTTCAGGAACAAGGTTTTGATTTGATATAGAGAATTAGAGATGTGCTGAGGCCTGATGATGATGGTGGCGGCTATGATGTGAGAAGCCTATGGTTTAGTGGATTTGGATTGATTAACTTAGAGGCTTCAGCAGATATGCCATTTGTTCAATTGTAAATGCATTTTGACTTCCCAAATCTTCTTAGTGCTTTTTCACTTCATTCTGAAC…
Gma.7858.1.A1_at	AW733417		0	No Homology to Known Proteins			GATCTGAGATTTCCACATCGAGCAACACATCAAATAGCAAAAGCAGCTCAGACTTCAAAGTAAGACCCTCAAGATCAGGGACTGGTCATGGTAGTAGTCTAAGCTCCAACNNNGATGCTCACAAGCCTCGGAGGAAGAGAAGACCTAAGAAGAAAAAGAAGCAGGTGTAGGCATGATGGCTAAACTGAGCAGTAGAATGAGCAATTGGATTTGTCGTATTCATTCGAGATTCTTACGGTTGTCTTACCTGCTGGGAGTCAGTTTCACTGGTTGATATGATGATATATATGTATTGACTTGTTAGGTTAGATCAAGAATTCGTTACTGTAGATCTTTTCTGCGGGCTCATCATATTCAACCATGGCTTACTGTAAATTATTTTGAATTCTGATTTATTTT…
Gma.7859.1.S1_at	BU082495		0	No Homology to Known Proteins			GATGCCTACCATGTGGAGCTGAACATTGCTAATTAATTGCCTGGTTTGGGTATTTATCAAAGATCAAGGGTTATGCCAATTCAAGTCTTCTATCAGATGGACGAATTTTGAGTTCTTCAATTTGTGCTGTAAGTACTGAAGCTGATTAGAAATGGAAAGAGAAGTGCTGAGCATGTGATGTATAAATAAACTTCGTATTATTAAGCTCCCTTNTGGGTGGGTAATTTGAAAGATCACTCCATATCCTGTTCATTTGGAAAGAACCAAGGCCNCAGATNNTACTTTTTGATNNNNNNNNATTGGATTTTTTNCTCCTGTCATAAAGTTGGTTTTTNNCCTNANAAAAGAGATATATTGTTACTCTTTGGATTC
Gma.7864.1.S1_a_at	BQ611662		0	No Homology to Known Proteins			AATCATGCATGCATGTCAGTTAAACCATATTATATACGGTCATGTGGAGAAAAGAACATGTCGGTGTCATTGTTAGTTTACTAGAATTATACCTTAGTATGCAAAAATAAGTTTATGCATGTGTTGTGTCCATCCTGTTTTTCTTTTTCTTTTGTACAAGTAGATAGGAGTCGTGCTTCTCCTTACTGTGTCCAATGTGCAATAATTTCCTTGAAGGGTT
Gma.767.1.A1_at	BU083371		0	No Homology to Known Proteins			ATGGCAATGCTGAAACTAGTTACACTAGTGGTGCTAATGCTGGTAATTACCAATTCAATGAAAATTCTGGTGGAGTTTTTGGCTCAGCTAGCGGTGAATTCAGCAGCAACCAAAATGACGCAACAGGTGCAGACAATGATNAATTCATTGAGCCACTTGAAGACAATGTGAGGGAGAACAATGATGAACCTACTGACTACGCTCAGAACCGCTGATGAGAATTTTCACCTTGCCTAGAGCAAGTTACTTCTTCTGGAGTTT
Gma.7875.1.S1_at	BQ610129		0	No Homology to Known Proteins			TAAGTGGATCGTGCTTAGACCGAGTAAATATAGCCAATACTTGGATACGTCGTGTAAATTAGTTTCACCCTGTTGTTTATGGAAT
Gma.7577.1.S1_at	BE330075		0	No Homology to Known Proteins			TGTTGTCATGGCCATGTTGATCATGGCAGCATCAGCTGCAGATTCACCAGCTCCAAGTCCTACATCGGATGCTACCACCTTGTTCGTGCCAACAGCGGTTGCTTCACTCGTTGCTCTTGCTTTTGGGCTTCTCTTCTGAGTTTGTCAACAATGAAGCAAGCAACTAATTGTATTGTATGGGATTCATTGTGTTTTCATCATTTTTATGATTCATATTACTTTGTGACACATTCATTTCCCACTGTACTTTTTTGTT
Gma.7042.1.S1_at	AW350007		0	No Homology to Known Proteins			GGTCGTTATGGAGGAAGCTTTAGCAGAGGGTATGATCTTGGTGGGTATGGCGGACCTAGTGAGAATTATGGAGCATATGGGGCAGGTGGGGGTTCTTCGGGTGGTGCTGGTGCTGGTGCCGGTGCCGGTGCCTACCAAAGTGGCTATGATGGAAACCTGGGAGGGGGATATGGAGGGGCTAGTGGAGGCCCCTTCTATGGGAGCACTAGAGGAGGATACAGCGCTGGTCGATATCATCCTTATGGAAGATAAGATTGGAAACCAAGCATTTATAGTCTAGGACTAATATGTCTAGCATCAAAGCAGGTTTGTAGTTTGTGTTTTGTTCATCAGATAGATTATATACTCTTTCAAAAAAAAANNNTTGTCAACGTTACTTTCATTTATGAGCATACCCAT…
Gma.6956.1.A1_at	BI968103		0	No Homology to Known Proteins			GAAGAGTCCGGGAATGCAATAGAATNNACATCGAGCTCTTCAAAAAATTCTGACTGATTTAGCATCATGATCTAACAGTTCAATGTTGCNNNNGANATCAACTCCAAGACTGTATATTTACATTATCTTTTTGTTCGATCGAGCAAGAGGAGTTGGAGCTGGTAGGAAAGGGGGCTCAAAATTTTTTCCTATAGAGGAGCCTTGCAAGAGTTTTTGGAAGTTGAGGTACATAACCCGAATGAAGTCACTGATTCTATTGTTTTCCGTTATTTTCCTAAAATTTTGCATGGAGTACTGCTACCATCCTACAACTTTAGAGAATGGCCTAACTGAAGCTTAAAATTTTGGCTAGCTGTGAATGGACAATGTGACACTTTGCAGTTTCCTTGTGATAATGTG…
Gma.6981.1.A1_at	CD398637		0	No Homology to Known Proteins			TTTCAAATTTCAAGTGTTGCAGATTGGATAATGTGTGTACTTGACTACTACTTATGCTAGGGTTTATGGTTTTTCTTTGTATTTTTCTTTTCAAAAGAAAATGTAACCAATGAGGAGATTCTTAGTGCATACAACTTCAAGGATGAATATGTTGCAACTTNGTATGAGGNNNNAAGATTGTTTAAGTAGACCAGTGCTTCAACATTGGCCTTCTTTTGTTTTTCATTTTCCCATTTGTTGGTGTTTCT
Gma.6855.2.S1_a_at	CA936064		0	No Homology to Known Proteins			GAAGGATATCCAGAAGTTACTTGCTGCCTGAGTGTAATTCAGAACACAAACGAGAGCTGTATGTAANAGCACGAACCGAGTGATGTGTGCACAATAAGTTAAAACTGAAGATGAGCAATAAGTATAGCTATGCAATTTACTTTGGTGTCTTTACTAAAGAAATTATCAGTTTAGGGAAGAAAATTATACTGTATTACCCCAAAATGATT
Gma.720.2.S1_at	BG509704		0	No Homology to Known Proteins			GGGTATCATGATTTTCTAGCATCATGTAGATAAGATGTGCACTCTTTACCTTTTATTTTGTAGGTTCCTTGTAGCGTTTAACAACATTTCTTTTTTGATGAACTTAAGGGTAACAACATATTGTCCAAGGACATGATTGTTTACTTGTTCCTGAGTATCGGTGTGGCATCTTAATTGTCCAAGGACATGATTGTTTACATGTTCCTGAGTATCGATATGGCAT
Gma.8822.1.A1_s_at	BI970193		0	No Homology to Known Proteins			GGGCCTTGAGTTCTCTTAAATTGTTATTATGTAACAAAGATTACTGTAGTCCAACAATTAAGCATGTTATTTGAGTGTGAGTGTGTGTGTGTGTGAAGTGAGATTGATTGATCTTTATAAGATCACATCAACAATTAAGAGAATGGGTGTGGAGTGGGTGGATTGGNAGATGAGTGTGCCCAACGACCAAAGAGAAGGTCTTTGAGTTCTGCTTTCCGGGTTCGGTGGACCCAAATATTAGGAACACAAGATCTGTTACAGGTGTGGTGCATCATTATGTTAAAGCCTTTGTTAGAGATGTTATCGT
Gma.8614.1.S1_at	BG156767		0	No Homology to Known Proteins			TTCTTTCTTTGCAAGTTTACATCTTTTTGTGTGTGAGAAAAATGGCATGCATTAGCAAGAGCAGAGCAATNNGTTCTTCTTCATGGCTTTCTTTGTGGGGNCTTCTATTTNGCTGCAGGGGTGANNGTGCTCAGACCAGTGAGTTCCCTCAAGCGCCAGCACCAGCACCAACAATGGACGCTGGAGCTGGATTTTTGGTGACTTACTCTGGAGCATTTGTTTGCTCCTCACTGCTCCTCTCTCTTATTGCCCTTCTATGCCATTAATTCTTCATGCTGCAAGGAGTGAAACCTATCTACTCTATTCAATTTATTTTTTTCTTCCCCAGATTCTGTTCTCTTATATCTTCATT
Gma.8564.1.S1_at	BU926782		0	No Homology to Known Proteins			AGACATTGAAAAGTCCCCTCCTTCTGCAGCAGAGGGCTGTTCTTAGAAGATTTTCAGTGCCTGCTCAGAAATACATCAGGAATCAAAAGAATATGAAGTTAAGGATTGAAGAAACATTTTTCAAGAGTCAGGTTGTAAATGGAAAGGCACCTTAAAGAGCTTGGATGAGAAGAGAAAGTGGATGGAAAAGGCCAAGAATATGAAATCAAGTAATAATGAAATCTGACCTTGTATATATTATATTATATGTAGGGATTTTTGTACATATATGTTGTAATTTTCCTTTTTAGTCCTGCTGCTTATCCTATTACTTGATCTTGGCATATGGTTACAGGGTCCAACAGCATCTGTCTAATTATTGGTTATTTTTGCTACCGACGATTTGTTGAAACGGTAACC…
Gma.9043.1.S1_s_at	BQ299017		0	No Homology to Known Proteins			TATCCTTATGGCTTGTGTAAATTAATTTGACATTCAATGCCCATCTGAACACATTATGGCAGTTGAGAATGGTGGAAGAAGGTAACAAGAGGGATCAAAATATTTCTTCCATATGAATGATAGAGTGGAATAAATAAAATTGCATTTATAGTTGTAGTACTTATTGTTCCTTTACCTAAGTTGTGATCTTGAAATGTTGTTATCTCATTACTTGGCCAGGCCAGAGACTACATTGGTGGCTGTTGCAAACTTGTGACGGCACTTCAAAGGCAGGTTGTCATATGTGTATTTGGACTAACCACATTGTTAATTTTGTGGAGGTCGATGAGCACTGCTCATCACTGGATATTGTATTGGGTTA
Gma.8896.2.A1_at	BU760781		0	No Homology to Known Proteins			TAGTGTCTTTGGCTGCTTCTGCAATGGATTTTTTGACATTTGCGGATGTTTTGCTNAGANACGAGGGTTGCAAATTTTAGGCAGTGAAATCNNAGAGGGTCGTAGTGNTCTTTTTGTGGTCTGCTCGTGTTTTTTGTTACTTGCATGACCNTGGGGNCTTCTACTNNTGTGTCTTGGNNNGCTACTTCTTGTTCAACNNTAATTNAAGTGCCCTTCCAATATATGAAAAA
Gma.8918.1.S1_at	BU762571		0	No Homology to Known Proteins			GATGTGACATACTTGTTTGCTTTTAGCTGAGGCATGATAGTCACTTTTTTTTCTTCATCACATTGAAACTTTTATATTCATGATATAGTTCCTCATCTTTCTTATTTATTAATTGTAAAATCTTGAAATATTATGATAACATTTAAATTTCTTGTTTTGCAGGGAAATGGTTACTTTGTTCGGTTTGGTAATTGCTCAGGCAAGATTGTGGTTATAGCTCCCTAAGGCTAATATCATTCCATAGTTGAATTAAATATACTTTGTCAAGTATAAAAAAGTTGTGTAGGAATCTAGATGATTTACTTAGAGCACCAATTA
Gma.913.1.A1_at	AW570445		0	No Homology to Known Proteins			GAGGCTTAAGGCGTCTGAGTTGTCAAGGTGGTATCAAATTGCAATGTGGATGAATGGCTTTCAACAAGTTTAAAATGTGGAGCAGTCAAAAAACATTGACTTGTTCTTGGGATTGTTGTATGAATTGATGAGGATCGTTGTTTAACCTGGGTTTTGTTGATAAAGCGTATTATTAAGTCATCGAATGTTTTAGTAGGTAGATGATTATATACATCGACGACCGCAGTTCTCGTATTTATATTCCATTTACCCTTTTTCTGTCGATATGTTGAT
Gma.916.1.A1_at	CA783523		0	No Homology to Known Proteins			GGTCTTTTCTTTTAGTATGAACGCATTTTGTTTGGTAATACCATCTTTGGAGATGACAATCATTGAAGTTGCAGTTCCACCGGCAGCTCTGTGTGTTACACACAGCGGAGAGGTGTTGTTGCTCGTGGATGTGGCAGGAAGGAGATGCCTGTATTCACTGGACATGGAGAGGACAAGCTTTACGGAACTTCAAATTGAAGTAGACACAGAGTTTGTTTATTCTGGTTATTATGCTGAGAGCTTAGTTTTACTGAACAATGCAAGTGGTGTAGTGTCTTATTAAAGTGGTAATGTCATCCCAATCTGATACATATGCAATATATATGTTAATAACTCGTTACATGTATCTGTATTTTCTACACTTTGCGTTGCTTTCTATTAGATATGTTCTGCTTGCTT…
Gma.9219.1.A1_at	CD406260		0	No Homology to Known Proteins			GAAGAGCTAAAATGACAAACTCGTGTTCCTTCACACCCTGCCTGTACATTAACATGGTGGAGTACGATATTTCATGTGTTAAGGCTGTGGCAAGCTCTCTGTACATTTACNNAATTCAGGGTGTCCCTCCATACTATTTAATTGTTCTGTTCTAGANNNTTTTTTTTTTGTCCTGTTTTCAATTTTGTATTTTGTTTAACCCCCATATTGAGGGCCCCATTGTTAGCTGCGTAGGTTTATGGTTGTACGCATTTGTTATTCTTTCACATTGGTGCCCCATTGNTTTAGCGATGATACCANTGAANGTAATTAGTTCACCATTCATATTTCATACCAGATCACACAATAGCTGCTACCTATATATACTCCCTAGTAAACATATATCACATTTAATCAAAA…
Gma.9252.1.S1_at	BI786435		0	No Homology to Known Proteins			ACTTTCGTGATGTTGTTGAACTTTCTTCCGTGATTTACTGTTATATATCTATCCTTCATTTAGTTTTTCGTCGATGGATGTTTCTTTTATTGTAATTCAGTGTGTCTAGCCACCGGAATTAATAGAGGTTATATACTATTAAAATTTGCGATCAAGGTTTTTTAGTGTTGT
Gma.9417.1.S1_at	CA802413		0	No Homology to Known Proteins			ATATGCCTAGAGAATTCCAGCGTGTAATTCATTGGCCGGTAATTATACCTTGTGTTTCGGTGTTATTATAATTTGATCCCGCTAACTATTTAATGCAAATTTTTTAGAAACATGTTAAATTTGCTGACTGTTTTAAGACGCATGGCAAGAATTGCCCGCTTGTTATAATTTTTTGTAAGGGGATGCTTTTATGGCTTCAGTTTTCCAAA
Gma.9459.1.S1_at	CA819044		0	No Homology to Known Proteins			TTTTATGTGGTGCTCTATGAATGATATGTTTTTCCTTCAAGTAATGTTGGGCTTGCTCTGCCTAGCATATGCATAACTGAGTGAGATTGTTATTGACCTTACCTTAGATTTCTTACTTAAGTAGGAAAAGGAAGGGAAGAGAAGGCTCCCTTGTTTCACATGTTAGAAGTTCGACATGTTGTAATTGGAACATCTGGCTTATGACCATGTTGTACCTTCTTGAAAAATATCTGTTTG
Gma.9925.1.A1_at	BF010330		0	No Homology to Known Proteins			GAAAGTAACAATCGTCGTCTTCATCAAGAACCTTCTGGNCCGTCTGCATATCTATATAAAACATGTCGTCGTCTTCGTCGGCATTACCGGTGAACAATCCCGAAAGGTCCACATCAGCATCCGCCATCACANCAGCACCACCACAACAACAACCAAAAAAAAAACCCTAAAAGCGCTTTCTTAAGCTGTTACACTTCCGCAGAAACAAAAACTCTTGCTCCGAATTCAGAATCACTTCATCGAATCGCATAGCGGAGAAAAAAAGAGAGAGTGTGTGTGGAATCGACGAAAATTGCGGAGTCAGCGATGGTTTCTGAGTTTTCTGAGTTTCTTCGAAGGTTCGACTTTTCGTCCCAATTTAGAGT
GmaAffx.10226.1.S1_s_at	BQ452761		0	No Homology to Known Proteins			GAAGCTCATTATTTTAAGGCATCCAGCGGATGCATCTTTTTGGACATTGAATGTGGCATTCTGCATGGTTGTATTTATTACAGATAACATCAAGTAACGCACTTTACCGTTT
GmaAffx.10340.1.S1_at	CA938421		0	No Homology to Known Proteins			GATTAATTGATAAATTACCCAAGAAAATAACCTAGCTAGCTCCTTGTGGCTATAGTAACAATAATAACAAATGTATGGGTACGAGTACGTGGATGGTTAAAACTATTTATGTATTGTATTTTACTTTTTTATTTTTATGTCTTACATATATGTCGAATGGATTGAAGACTTACATCGATGTAAACGTATTAATATA
Gma.9692.1.A1_at	BG362937		0	No Homology to Known Proteins			GGAGGAGGCCCTGAGTGTTATAACTGTGGAAGAATAGGTCACTTGGCAAGGGATTGTTACCATGGACAGGGTGGTGGTGGTGGTGATGATGGTAGGAATCGGAGACGCGGCGGTGGTGGTGGAGGAGGAGGAGGGTGTTTTAACTGTGGGGAGGAAGGGCATTTTGCGAGGGAATGTCCGAATGTTGGAAAAGGAAATGAGTGAGAATGTGTTATGGTTTCTTCTATTGAATTGAGTCTGTTACTGTTAGTTGGGGTTGGTTAAATGGATTCTGTTATTTTTGTTTCTAGCCATTGGCATTTCCTTCCTTCCTTCCAAATATGTTTTTCCAGGGCTTTGCTAATTGTTTTATCTAATGCGCTTCTTTTC
Gma.9700.1.S1_at	BI968093		0	No Homology to Known Proteins			AACCCACTTGGGAGAATGCGAGCTGAACTGAGTTTTGGGAATAGTATTATGACATGGTCATTTTGAAGAGATATTCTGTTGGGAGAATGCTGCCTCTTTCATTGTTTGGGCATCTATTATGCCCTACCCATTATAGTATCATTCTTCCGTAGCAGGTCAAGATTTTTAATTAAAGTAAGGGAGAGGTCAATAATCTTTCAGTATGATAGGGTTGATTTTGTAAGTAACTGGAAAGTGCAATGGAAAAGGCAATTTGAGATGTTATGTGTTGCAAAAGAATGGAAATACAAGCAAAACAAAAAGAAAGTATGGATGGCTTTAGTGGTTCAATTTGAGGTGTCATCACAAGTTAAGAATTGGTTCACCAGACAGAGATTTGTAGATACTATATTGNAGTAC…
Gma.954.2.S1_at	BU965254		0	No Homology to Known Proteins			TTCTTTGGCTTGTTGGGTCATGTTTTTGAGTCAAAATCTTCCTGGAAAATGTCACCTCTGGTTTGGTAAAATTTTCCATTAATGAAATTGAGATCGATAAAAGAATGAAGATATATANNATATATATATATATGGCCNAAGTATACNNNTTCATTCTAGTGTAATGAGGTCAGATGTTCAGAGGGCTATAGACAGCTGACATTATACCGAAATCCGCGTGGATCTCTTAACCTGATATTCGTCACGTCACACANTGGATACTCTTGTTTATAATGTTACATTTCAAATTAATTTCCCTCTTCCTCCCATACTAACCTGTAGGGA
Gma.9548.2.A1_at	CD395161		0	No Homology to Known Proteins			TTATTCTGCTGTGTATGGGTAAATAAGTTGTTTATAATATGAGATTATTAAGTGTTTAAAAAAAAAAACAAATACTCGAGACTAGTTCTCTCTCTTCTGATGTAAAAAGGTTTTATTTGGTCTTGCTTTATTTATTATTACTATTACCATATGCCTAATAGGTTGTTTTGGGGTTGGGGTGTAGGTAAAGTCACCTTCTCCATGTCAACAACGTTGTATGTGAACTGGCCTTAAGTTTATAGTTTATGCCATGAGAAATGCCAATTGTCTTAGCTGTCTCCAAAAAA
Gma.983.2.S1_at	BI095024		0	No Homology to Known Proteins			GTTACACTATGGTAGGAGCCTTTGTCAAGGGAGCAGCTCATTGTTGGATCCGTTGAGATGAAGTAATAACATTCATCTTGTGTTTCTTGGAAAAATGATTAAACAANCACATGCTTTCACCATAAATCTAGTTTGTCATTTATCGATAGCGGTGCTTAGTGGCATTGGGCCACTACAAGGAGACCGTTGCATCTCAGTTCAGTGGTGCGTGCGGCCATTGCGGCTGTATCCCAGAGTGGTGGAACGTCAGATTGTTTCAAAATCTTCTAGAAGATCTGTCTGAAGTTGTTTCAAAATCCCAAAAATAACCTTACTGAGTGGTGGTAGTGGGGCCATTTTGGGAATTTTAATATTGTATCAAGTATCAACATCAAAGAACAAAAAACCCCTCGACCCTTC…
GmaAffx.21299.1.S1_at	BF424037		0	No Homology to Known Proteins			TGGCAGTTATCAGAGGTTTACCGCTCAGTCATGTGCTCGATGTTGGTCTGGTGTTGGCTTGTAAAGGAACTGGTGTCTGGAGGGAAAGGGTGGGAACCTTTTCAAAATTTTTNNNTTTTANNAAATCCTCTAGTTTATTGGAGTACTTTTTTGGTGGGAGAAAAAAGGAAAAGCTTGTAAAAACACTTGTAGATAGTTTTCTTATGATGAAAATGATTTCAATCGATCAACTTTGGTGCCTATTGTAATGTGACNTGGCTAGTTCATAAATTATTGCCTCTTGTTACGTGG
GmaAffx.21302.1.S1_at	BU547335		0	No Homology to Known Proteins			CTGATAACTTGGGAGACAGGCAGGAGGATGAAGGTGTCGCTGCATCTCTTTCCCTCTCTCTGTCCTTTCCATCTCCAANNAAGGAACANACAAANGCTGCAGAGCTTTTGCCTGATGGGCAGCGTGTGAACAACNCGTTTTTCCTTTTTGGGAGAAAATAAATCTGCTGGCTGCTTANNTGNTTGNNNNCAANCATNTAAATTATCTTATCTTGTTCCNGATGGCCCAGCCTGTATGATANATAGATATAATCTTCCAGCCNCNCTCCCTACANAAAGGAGCCATTGTCCTCAACAAGAGTCAATAAGTTTTTTTTTTNAATCCTTTGTTANATACATGTTTTTNTGNTAGTTTTTTTTNTNTTCAGAATGCATAGTTAACGGCTGTTTGTATATATAG…
GmaAffx.20425.1.A1_at	CD412894		0	No Homology to Known Proteins			GAAGAGATTGCTGCTTAAGGCGCCTCTCTTATTTGTCAAAAATTGTTTCAAANATCGATATGGTTGGCTTTGAACGAGTGGTGTAAGTTTAAATTGTGGTGCAGTCAAATTAGATTGACTCGTTAATGTGTATGCTTATCGTTGATTGTTGACATTGTATAAACTGGGTTTTGTTGACAATGCTTATGTTCTTGAGAGATCAAGTCATGGATGTTTGTAATAGTTAATGACTGGTCTCGTTTTCTTCCCCCCTTTTGATATCTTGATTATAGT
GmaAffx.20697.1.S1_at	BI967357		0	No Homology to Known Proteins			GTTTGTATTCTTGGATCTAAAGCTTGTATTTAATCATCAATTTCAATATATTAACCCTAAAATGTGAAATTAGTCATTGGGTTATATCAGTTTTTCTTTTTGTTTTGACCTTTTCCTTGATCAGCAGTTGAGATCAGCTCATATCCTTTGTGTGACAGTACACTCAAAATTCACGTGT
GmaAffx.20724.1.S1_at	AI973750		0	No Homology to Known Proteins			TTAAATCTTTTGTGGGTCATTCATGTGGCGGTGAAAGATATTCTGGAGCCAGAATGTTGGAAGCATTTCAAATGTGATTGGTGAGATCTTTAAAGCTTACCGTGTTTGCTTCTGGATCATAACTCAAAACCT
GmaAffx.24464.1.A1_at	BU550821		0	No Homology to Known Proteins			GTTTCTTACACGCAGGCAAGGGATAGGAATTAAAACAAGTTTTGGTTAATGTTTTATTTTATTATTCTAAGTTTGGAATTTTAATAATTTTGAGTGCAATTTGTTTTTGCTATGGAGCACATCTTTCTTCTCAACTTATGTCTGGAATAGAGAATTTGGGGCAGCTAGAAAACTTTGTACCTAAATGGCTAAACGATGTTT
GmaAffx.24507.1.S1_at	BU760930		0	No Homology to Known Proteins			TGAGCATTAACCCTTATAAAGTAAGCTAGTACAAGGTAGACTTAAGCAATCTCATTGCCCTGAAAGAAAGCTCAGTAGGTGGATCTTCTTTCCAGGTCGCAGGTGGAGAGCCGGTTGAAAGGCCTTCTGCC
GmaAffx.24792.1.S1_at	CA819334		0	No Homology to Known Proteins			TAAGAAAATTTAGTTTGAGTCCTGAAAATAAAATAATTGTGGAACTCAAACAAGTTGTACCAAAACCTTCGTCTATAATTTTTACTATTTCTGGACTGCACCCTCCCAACCAAAATGACCCATTACTCGCAACAAATAC
GmaAffx.24794.1.S1_s_at	CA819492		0	No Homology to Known Proteins			AAACTTAATCTTGAGTGACTAGACACCTTTTGCGGAATGTAGCCAACGAGAATAAAGCAGGACTTAATGTATTGACAAGGCTAACCTTGTATTTGGAACAGGACTT
GmaAffx.18769.1.S1_at	BI972364		0	No Homology to Known Proteins			TGATGTTTTTGGTCTTGGTCTCGTACTCCTCCATCAAGGTTGAGGGAATGAGACCGCTGAAAGCTGATCCATCCTTCATAAGTTTGATAATCAACCGGGCTTATTCTGGGCCAAGCCACAGAGGACGCGGTCATTGAACTTACAAACTTGCCCTCTTTTTTGTCCATAGAGATCAGGATTTATACTCTTGTCAAATCACATTTGACACATGCAGATCCAACACACTATGTAATTTATTTTTTGTATACCTTTCTGACAATACCGTTTCTCCTTGCATT
GmaAffx.1790.1.A1_at	CD412488		0	No Homology to Known Proteins			TTTCTTTGCTTTGTTCTCTTATAATTTAATTTATTGATGTAATTTGAATTTTGTTGCCACGAAGGATGGTTCCAA
GmaAffx.18182.1.S1_s_at	BG652355		0	No Homology to Known Proteins			AATTGTGTGAGGATTCGATTTCGTGTGAAATGTGAACTGAGTTGCAAATGGAGATTGACGCATTGAGCACAGGCAAAAGTTTTTGCCTTTTAACTAAATGGTTTGGAACGTGTGCCACAATGTGAAAAAGTTGAACCTAAGAACACTCAAAACTTTTATTTATTAGCAAAAAAAGGACTCTTTTTGCAATAATACAAAATATTAAAATGGTATTCCTGTTTTAGTAAACGGGAGTTAAATGCTTTGGGTGTTGGGGTGTTGCAACTTTGCAAGATGAGTCAATATCTATTTGCCGTATTTTGGAGTGGATTGGA
GmaAffx.16408.1.A1_at	AW311648		0	No Homology to Known Proteins			ACAGCATCGATAACAATGGTCTCTTGAGGCTCTACTTGGGTGGCAGGAGAAACGGGTCCGGGAAAGGAAGGTCGAACCAGGCACATTCTATCGCCAGAAACGTACTTCGATTGTATTGAAAAATTGAAGGTGNNNNNNGGTTTCATGATGTTNATTAGTTAGTTAACCTATGTATTCTTGATGGTTGGTTTACTTGGTTAATTGGTTGGAGTTGGTTAAAAGAACCTGCATATCTTTTTTCTTTTTACAGTCAATAGCATGGTTCTTTCT
GmaAffx.16409.1.S1_at	AW317152		0	No Homology to Known Proteins			TTGGGTCTGATTTCCCGTAGTCTTTTGTGGTTGTTAGTCCTGTGTAGGTTAGCCAACCATGTTAGTTAGGACTATTTATACTGTTGTTAATCTAGCAGTGTTGTTTTTACATTGTAAATTATGTTTTAGTGAAACTCTCTTCTTTCAGATGTTATGACCATGTACTTGTTTATATTGCAGCA
GmaAffx.16435.1.A1_at	AW349827		0	No Homology to Known Proteins			CTTTTGTTGAAATTGAATGCATGGGGATTTCGTCCATGCATTCGAGTTTTGGTTCAGTCTAGATTCTGAAGGAAAGGTACCGCTGTGCTCGGTCATTGCATTTTATACTTTCATTGGAAGTTCCAGGTCATCCTTGTTATATACCAAAGCTGTACTATTTTTTTTGTCACAATTTTGTGCATTTAGCCATCTGTAGTGTCAATTTAATGGTTTTTTAAATATTGAGAAGCTTGATAATGCGGTCAAAATCAGTTTGAGTATGCCACTTGTA
GmaAffx.16438.1.A1_at	BE023899		0	No Homology to Known Proteins			GGTACGGCGACATAGGATCACATATCTGGTGGTCAGATGAAAGAAAACTCAAAATAAGCAAAATGGAAAAAGAAAATCAGCTGGTTGATGGAAAGCTGGCTGGGTTGTGGAGGTTTCGTTCAGGTCAGTCAGGGTGTAAACCAAACTGGTCAAGTGCTGAATCACCGGTTTTTCAGGTCTGGTTTTTACAACTATGATCCGCATATCAGTTACTGATGTATTCCATTTTTCTTTCTGTACGAGGAGGGGATTGATACGATGGTCAGCCCATTTAATTATTTTTTACCAGCCNNNGGNNNAATTTATNNNNAATGTTTTCATTTCCCTTGCGTTGTTTGTTTTGCATGTTTTTGGCTGTCGTTCCCATTTGAATAATA
GmaAffx.16900.1.S1_at	BE022916		0	No Homology to Known Proteins			ACTGTTATTGGTTAATCTCGAATTTCTTGATTATTTGTTGTTACTTTCAATGTAGAGAAATATAACCTTTTCATGGAATGTAGAAACAAGTGCTGTTGTATACTCCCCATGATTAATAGACATGTAAACGATTATTTCATCAA
GmaAffx.1736.1.S1_at	BQ629408		0	No Homology to Known Proteins			GAGAGAGTGTCTTGTTCTCGCGCATAGTGGCGTGGGTTTTTTTTTTTTATTTGTCCATTCTATTACTATCATCCCTTCTGTTGCGAACTGCCTAACATTTGTCAGTGATTGATATGTATTCTCGAGTCTATACCCAAAAAA
GmaAffx.17465.1.S1_at	AW459741		0	No Homology to Known Proteins			GAATGACGGCGTGTATATTTGTATAACATATAGTTGTTTTTAATATGTTGGAAAGAGTGCAATACGTATGAATTTATTGGTAACTGACACGAACTATGTTGTAACTGGGGACATACCAAATAGTGTAATGGACCCTTCAAGTTGAAGAATGTACTCTGGCCAATTTCGATCAAACAAGCATGAAAAGGCCTTATAGTTCCACATG
GmaAffx.11909.1.S1_at	AW423454		0	No Homology to Known Proteins			CATGGTGTACATGACTGTAGACCAGTTGAACTAAATTCAATTTTGCAAAGTTGCAATAAATATATTTTCAATTAATATTCTCAGGCATTGCCTTAAAGACCACGTACCTCAAATTTGGGGGCATGGCTAATACTTCATATTTCTAGATGCTAATTATACTGTAAATGTGTAGTGAGGAAAACTATTCTTCCTATTCGTATA
GmaAffx.11919.1.S1_s_at	AW760869		0	No Homology to Known Proteins			TAGTAACCATTTATTCTGATATTAAAAAAATAAACAAAACAAATAACAACTCATGTGATGTGAGTTCTGGACAGGATTCTCCAGCCAGCCGGCCATCCTCTATCTCTATTCTCTAAAACATTATATTATATCAAAATTCTACCATATCATAGAATTTCTCTATATTAATTTTCAATAACACGGAATATTGATATATTATCCACCCCTCATTTTTTACACGCAGGTCGATTTTTTTTTCCAGTTTTTTTATTTACAAATTACAACGTGCGTGCATATTCCGTATCCCGTATTCCGTCCGTGTGTAAGAGTACACCG
GmaAffx.11220.1.A1_at	CD415475		0	No Homology to Known Proteins			TATCATGTGGCTTTGACATGGGTGAATGCCTTGCACGTGTTCTCGGTTTTTTTGGCACGTGCGGAAGGATATATATTGATGGAGTTTTTTTTTTTCTTTTCAGTATTATTAATTATTGGGCTTTATTTCCTATTTTGTTCTTTTGGTTAAATATATATAAGTTTGGTAAGACACCGGGATTCATGGGCGTTGGCTTGTGTTGAAAAAGGAACTAAGTAAATTATTTTTTTGTTAACTTTTATGATTGATTTTTTTTTTGTTTACCNAAGAATAGCCTGTGGCTTTGGATCGATATTTGTATG
GmaAffx.1184.1.S1_s_at	BI470180		0	No Homology to Known Proteins			GGTCTGCATAGTCTACTTTGAATATGTAAAGTGTGTTTGTTGTGCCATGACAGACTCTCTATTAAAGATTTAAAGTATTAGTGTGCGGAACAGAGTTTATCCGAAA
Gma.9854.1.A1_at	AI440587		0	No Homology to Known Proteins			AAGCCAGCGGCCCAAAAGGAACAGATGTCTGATAATCAGTCAGTAGCTCATTCTTTAGACGGTTCCGATGATGTACATATGGACCCAAAACTATTGGAATCTGAAGGTGCAGTTGAGGGAAGCAGTGTCAGCTCGGTTCCCACTTCTAGTGAGATACAAGAGGAGCATGAAGTCAAATATGATGAGAAATGAAGGTGAATCATGCATGATCTATCATGAAAAACATGATTTGGAATAAGCTTGTCACACAATCTGTTTCATAATCATATTAGTTGTACTTTGAACTGGACATCAATACAATATGCAAACGCACGTATCTTTCTATGCA
GmaAffx.11166.1.S1_at	CD403849		0	No Homology to Known Proteins			GGAAAATGGCATTATCTTCAAAGAAACTTGAGAAGAATGGNCTTGGTTCTAAATTAAAGAAGACAAGGGTACTTGTTGAGGTTGAGCGTGAGGACGCTGGTGAAAGACAGAGGATGGTACAATAGTTGCATTCGCCATTGTTATGGACAGGAGAGGAAAAATGCTATAGCAGAATCGGAATTTTGATTATTGAGTCTTCTATTTTTTTTTNCAGCTTTTGAAATTATATAGATTTTCCTCTTTTCTTTTTAATTTATTTCATATTTGTTCTGAAGAGTTCTGGCAAATGCCATAAATTGTAGTCTNGGGTTGTTTGATATAGGTGGAGCATCTCATTCCTGCATTAATTGACCATTAGGGTGTTTTTATAATTTTCTTGGGTCACGCAGCTCAGCCAGG…
GmaAffx.1301.78.S1_s_at	AW394497		0	No Homology to Known Proteins			CTTCTCAAGTGATCTGAATTTAGTGTTCCTTTGACATGTCTAGTGTTTTTCTTGTTTATTTCCCTAGATTTCATCGTATATCACTTGTGTTGGATGTAATCAAGAGATCANTTTTATCAAATAAATAATGCCAAATGGCATGTCGAAGTAAAA
GmaAffx.13300.1.S1_at	BG155364		0	No Homology to Known Proteins			ACGTCACTGTTGTTTAGGTGTCCCTGTACTTGTTGGTAAAAGCAATGGTATCCTTCGGCAAATCTGTCTTTTGAACCTACTATGATTTTACTGACCTCGAAAACTCAACTCAACAATGATGTTTTGTGCACTTTCATGTTATTAGTCTCTACAAACTGGAAAGAGGCAAATATTGATATTTTGCTTGGTTCTATTATTGTCTAGTTACTACGTAGTAGTAATTCACTTTTAACGTTCCAACTTGTGGTTTTTAAATTTCATATCTGTTGTTCTGTGTTAGCATTATATGGTCTGGTATGTAACCAAAAAGTTGTATAAATTAATGGGAGAATACCTCGTACTCAACATACACTTATAGGCAAGTAGCTTTCCCGAGTA
GmaAffx.13310.1.S1_at	BG156536		0	No Homology to Known Proteins			TCGCTGACATGGTTTGAATACCTCATCTAATTTTTATTTATGGACGTGTGATTATAATCTTCTACAACTGTAACTTACTCTCGTCATGTATCAAGATTAGTAGCTCATGACTAGTATTCGTGTAATTACCCTGACGTGTAGGGATCAGAAGAACGGCGAGTACCGTGTAACAACTATACAAATCATACAATTTGTTTACCATTAAACTTACATTTCTTGGGTCACTGTGCTTAACCCAACAGCATGTAC
GmaAffx.13356.1.S1_at	BG237838		0	No Homology to Known Proteins			GTAGTGTGTGAATTGTGTCATACCTTATCTTCAGCTCCAAAGTTAGTGTTCCCATTAAGTAAGCAATATAGTTAACGGTGTTGTCCATTATATCATTTCATGTACAAATGATTTATCAGGAAAATAAAGAAGAGAAAATCTCTGATGCTTTGAAAA
GmaAffx.1338.1.S1_at	BI967589		0	No Homology to Known Proteins			ATAGTCCTCCCTATAGTTCTAAGAAATTGATTGATCACATATTCTAATTGGTTCAAGGTGGTGGCTGCCAAGAAATTGGACTAGTTCAAACTTCAAAGATTATTAGTCAGGTCAATTCATGCTGCCTAGACCATTGCATTAGAAAAATATATACCTTGGCTTTTGTAATCAGTTTTGTTTTCTTCTTTTTGGTCGCATCATGTGTTGATTAGTTTACATTTTCCACGTACCCATTTGTACATGTTTGAAGATTGAGACATTTTGGTTTGGTTTGGTTTCTAGAAGCCTATGTATGGACACGGTGCTTGCATGTACCGTTTAGAATTATTACTTTACTACCGGGAAGAGAACTCATTGAAGCGGTTTTATTCTAGCTAGCTAGGGAGAGAAACGCTAAGC…
GmaAffx.14577.1.S1_s_at	BM528204		0	No Homology to Known Proteins			AATGTTGTACAATATATATGTGCATATGTATGTAGTAGTCATTCCACAATATGGTAGCATAGCTGTCTAGTATGATAGACACGTCTGTGTCGTGTTGCCGCAGTTAGATTCACAGTTTGACCGTATCCATTTTTGTTTTGAGGTTAAGTTTAGTTTTCTCTCTTGGTTAGTGATAATAACACGCAGTTACC
GmaAffx.16182.1.S1_s_at	AW508093		0	No Homology to Known Proteins			TAAGCCACTATGCTAGTGCCCGGAATGCTACCATTAGTATGCCTTTGCACGCGCTGACACTAATTATGTTAAAGAGAGATGCTTCTAAAGTTCTGGGATTTGGTCTCTTCATAGNTGGTTCAGTCACTTCACAACTTTTTANNGCTGCATGGTATCATTGAAAAGTTGAATGAGAAACAAGGATGAGCTGAAATGATGCAATCCCTTCAGTTGCTGCTACTGCTCAGACTCTGTATCTTGACGAATTTTTTGACTAATAATTTATATAGACAGAGAGATAATGTTGTTGGTTTTCGTTGTGTTAGTGAGGCTGACGTGAATGGNGAANGTGTGANGCGAGAATAGTTTATTTGTAGAACTTTGGAAGAGAACATAATGGACATGTTGCTAGTGGCTACA…
GmaAffx.16198.1.A1_at	BI967872		0	No Homology to Known Proteins			TTCCACTCCTTAAAATACCTTTCATAATTTCATCCTGGGCTACCTACGCCCTCTGACTTGGTATATCTCTGCCAAGTTGCATGCATGCAATAGATCGATATAGTTTGATTTCTTTCGCGTTTGTGAGAGCATTATTGTATGGTGTTATCAT
GmaAffx.51455.1.S1_at	BQ627628		0	No Homology to Known Proteins			TAATAGACAATACTTGATTATCATCTGGTTTTGTCTAATTCTACCCTTTTATTTTCTTTTCTCTTTTTTATTTTGTTTTGCATATTTTCCCATATTCAGANNNNNNNGTTAGCTGCAAAAATTGTCTATAGAGTCTTTTATTTTTTGCTAATGTGGGTTTCTTCTCAAATCTGTTGCTCACAATCCTTTCTGAAGCATGGATCAATCTTCAATTGCTNAGAAGGAAANGAGTTATAATAAAAGAGTATCCTAAGAATTGGCCAGTGGACAAGATACAAAGACCATTA
GmaAffx.5160.1.S1_at	BM270197		0	No Homology to Known Proteins			ATCTCTTCCGATGAGCCATGTATTAAGTGCCCTTTACATATGCTTCTTATTCTTATTCGTATCCGGTTTATGTTTATATGTATAAGACATTTATAAAATCAGGGTTTTCAGTAACCTTTATGTTACTGTCTCTGTTTTGTTTCACTTTTCTTTCTCTTCTAATAAATTTCTTTGCTCTTCT
GmaAffx.49801.1.S1_at	BQ627796		0	No Homology to Known Proteins			TACGTGCATGCGGAAATCGATTAAGCACGTCCCTCCAAAGGAACTTCAACTAGTTAGTTGTAAATAGAGTTGAAGACAAGTACATGTACACTAGTATTTTGATGAAAAGAGCTCAAATCTACCTAACCTTAGTGTTATCATTAAATTCA
GmaAffx.49999.1.S1_at	BG510206		0	No Homology to Known Proteins			CACCCTTTATCAAGTATTCACCCTANNTTTTCNTNNAAAANNANATNANATNNTTNTTTTTGTTGANTTTTTTNAATCAATTTATTNTGTAAAATTTCTGACTTTNATNTNTTTNTTNTTANNNTAAAACAGCTACCAATCAGAAATTGAAGATTCAGGAGTTGGGGCTGAGCTTATGGACATTATTCTCCCCAAGGTTATTTTTTGNCTCAATCTTCATGTTGAAAAGAGTTTTTTTTTTNNNCTTTAAAATTGTTTAATTTTTCCCCAAAATATTTTAAATGAAAAATATATATGAAAAAATTGGTTGGTTCGTGTGATTCCTCAAAGATGTNACAAATNTGAAGTTTTAATTTTGGTGTTGATTGCTAGGGAATAGAGATGCCAACATCTCTATCA…
GmaAffx.47518.1.S1_at	CA819417		0	No Homology to Known Proteins			GAAAAACGTGTGTATCTTATTCCAATTGGTTAATTTATTTTTTCTTTTGACCCATACCATGTTTCCTTGTTACCTAACTCAATT
GmaAffx.47778.1.A1_at	CD408545		0	No Homology to Known Proteins			GAAGAAGGTACTCAACACTCTTCATCTCTATTTTTTTTTTCAATTTATTTATTTAATTTCTTAATTATTTGCTACCTAGAAAATAAATTTGGTATTAGGTGTAGCGATTTATTATTTGGTTATTATGTGTATAATTAGGTGAGGAAAGTGGACANTGCTTGAGGGTGTTTCCGTCGTTCGATCTGGTCNAACTTCCTATACTAATTTCTTTTTTTATTTTTTATAAAGTCATATGCTATTTTCTGGTTTTGATGTTTTTCGGACTCTACACTAAAGTTTTGATGT
GmaAffx.47806.1.A1_at	BG508458		0	No Homology to Known Proteins			AGTTATTGGAGGTCGTTTTAGCATCATGTGATCATTTTCCTTATCCTTTGTAACCTTNGGGAAATGTCACTTGCACCTTGAAAAAGCACGAGATTGAAAAAATGAATGTAATATGTTTGAAGTTTTTCTTTCTAGATCTTTTCTTGCCATTTAAGCTTTTCTTTACTNCAAGAAATTGTAAAATAAAGGGTCGAAGACAAAATCTATCAGNTGNGATTTTCATTTTCATTCCTCCAATAAAATTGCT
GmaAffx.48094.1.A1_at	AI988060		0	No Homology to Known Proteins			AAATTTATCTTCTGGTTCTGGTCTCAGTGTGTTTTGGAAGGGGATGGAGGCATTGATTTGGTCCCATCTCCTAAATGAAATCTGCATGTCACTTACGCTTCAAAAAAT
GmaAffx.48423.1.A1_at	BI969977		0	No Homology to Known Proteins			ATTCTTGAGTCCTCCTTTGTACATTCTCAGCATTTTCATTGTGTTACTTTCAAATCAAACAGAAATGTATGTATGCAAGATAAAGAAATTGTATATGTTCCTACCCCAGCAAAGGGGGGCTTGGAATTCACACTGTACAGTAGAAAGCTTAAACACCAATGTACATACATAGCTTAGTGTAAATAGTTGTGCTCAGTAGCATGTTACCTAGGTTGTAAATGGAGCAAGTAGTTCTTTTAGATTATCAAGTCCAAAAGAGTAAATAGTGCTTTTAAGTGGTGTGTTTGGA
GmaAffx.48466.1.S1_at	AW396563		0	No Homology to Known Proteins			TAATATTTTATTTGCCTGTTCAGATTTTGCTCTCGACAGTCCAGTTTGTGATTGGAGATTGGCATATTTATTCCGCATCTGTTCTGAGTGCCATATTTACTTGGTTTT
GmaAffx.48979.1.S1_at	BE058912		0	No Homology to Known Proteins			GAAAAATTCAGGGTACAGTCGTACAGAGATGTATTTAAGAGCTGTTTATTGTGGCGCTAGTAGATACTTGAAAGCATTGATGCAAAGTGGATGTGTTCTTTTAATAATGTTATTGTGCTGTACAAGATTCCCCATCCACCACCTCTGTATCGTTTCCTTTTTGGTTGCTGTAATTTCCAAGCCTACTAAAAGAGATT
GmaAffx.4898.2.S1_at	BQ297235		0	No Homology to Known Proteins			TGTGCCAGTCGTCGCCGGTAATAACAATACCGGCGTCGCAAGCACGCCGCCGCAGCCAACGTCACCGACTTCTTCCACCGGCTATTTGTCAATTTCCTCTGCTTCCTCTCTGGAAAGATGTCGTTTACTCGGGCGTTCTTTATCCTTTTTGGTGCCGTTGGTGATGGAGCTGTTGATTTTGAAGTTTTGAGGATTTGTGGGTTCAGAATCCAAAGAAAGACACTGGGGCATGGCAATGGGGAGGAAGAGCAAAGGCAGAATGAGAACGGAGTAAAGTGAGTACACGTCGTCTTTGCAGNGAGATGTCGCTTACTGGTCTAGGAAGTAAAGGTAGTTGTTTCAGGAGCTTTTTCAC
GmaAffx.495.1.S1_at	BE057825		0	No Homology to Known Proteins			GTATTTTTCAGTATCGATTATCGTTTTCATTTTGTCAAATTTTCGGCTATTGCATCGTGGCTGTTTCTTTCTTTAAA
GmaAffx.44838.1.A1_s_at	BE822969		0	No Homology to Known Proteins			TTAATTTTTTGCATGTGGCCTTTATTTTCCTTTTTATATCCCTCATGCATATATTCAGGACGGCGGTAACCACCACGTCTAGGTAGCACCAAAAGCCATAAGGTATTGTAATCACCTCTGAATTACTTATCTGCTGCGTTCCTTTTTTCGTGGCATGGAA
GmaAffx.46118.1.A1_at	BI784649		0	No Homology to Known Proteins			GGGCCTTCAACTCTATCGAAACTAACTGCTGAGGAAGCTGAACATCAAGCTCTTCAAGCAGCAGTACTACANGAGTGGCATATGATCTGCAAGGATAGAACAACTGAAGTTAATTAACTATTTTCTTTTGGTGTTTTTGATTTTTCTTTTTTCCATGGCTTTCCGAGAAATGTACGAGTGTATTCTTTGTAATTTTTTCTCATTTTACATACACGAATTAGGTAGAAGCCAAAATTTGCCCGAGAAACGTTCGAGTGTATTCTTTGTATACTCTTTCCCATAAAACAGGAAAGTGTTTTGTACATGTACCGCGCGGCTATTGATCTGCTATTTTATATTTGAAGCATTTGTTGGAGGTGTTAGGCATTTTTTTTTTCTTTTTAAGGTTTAAATGTACTT…
GmaAffx.4631.1.S1_at	BI427495		0	No Homology to Known Proteins			AATACAGTTCATGTTACCGACGATATGTAGTCAACTAAGTCATGTTTATTTTTGTGTTGTGAAGCATTTGGTGTCCTCTACGGACTTAGAGGTCTTGTAATACGGCTCTTTCGCATAGAACGAGTTTTTTTCTTTCTTTCTCAAACACGTGCCGAATTCTGTTCAGTTCATACTCTTTATACATTCCTTGGAGTGTT
GmaAffx.43216.1.A1_s_at	CD414339		0	No Homology to Known Proteins			TTAACTTTAGAAGATGTGGGCAAATGAACTCACCTGGGTGATGGCTGGTTTTTCCTGCAGCTGTCTTCACTCCTGCTGAAAAATCCTCATTTAGGAATTTTTGAATTGATCCGAATTCAAAGTACAGAAGAAAAAAATGCTAATGTTGTGGTGAAAATTGTAGCTTTGTGCTCACAAATTTAATTCTCCATTTGAGGGTATGAAAT
GmaAffx.43551.1.S1_at	AW101224		0	No Homology to Known Proteins			GTGGATGTGCATGCGTCCATCGAAAACTCTTGCTGAGTGTGTTTTCTCAGTGTCTGCTCGTGTTTTTATATAAATAA
GmaAffx.43949.1.S1_at	AW569516		0	No Homology to Known Proteins			GTATTCGATTGACCCACTTTTAGAAAGTCCGTCTTTCTCCTCTTCATCAGAAACCAGGTGAAACAATGATGACTTTGATCCCATGAACATATTTCAGCTTGAGATTTGGAACTGGGAATGACTTAATTTTTACTTTTGCATACATGCATTCATGTATGCATTCAAA
GmaAffx.39219.1.S1_at	AW397891		0	No Homology to Known Proteins			CATTTTCGTGTCTTCCTACGTTTTGGCTTGTTTTATGGTCAATGTACCTGTATAATTCAATTTGTCAATGAGTAGAGACCACAGCTGAGTTTGTTAATTGTATTACAC
GmaAffx.39034.1.S1_at	BE820439		0	No Homology to Known Proteins			GCTCTTCACTGGCATCTGCTGGCAGTGCTTCACGTGGTAGTACTGAGGGGATAGTTTTGTCAAACCAAGCAAGTTGATTTGTGCTCCATTTGTAGTTAAGTAGGTTATATTTTGAGGGTGTTCACTAACAAAGGGAATCTAGCTATGCAATCTGGAAGCCCTTGGTCTTTGTACTTAGGATGGATGAGATTGTGTATTTTGAAAATTGGTGGTTGTTAGAATAGGGTGATCTTTCCTTCAGGGTATTTGATCGAGGAATTCTTGTAAGTATCCCAAAAACTTAAATTGGGAATGCTAGATTTCCTTATTTGGTATTAATTTTTTGAAAGACAATTTTAGGAAACTATCATTTCTAATGATTCTCTTTCCTCTCAACAA
GmaAffx.39099.1.S1_at	AW278540		0	No Homology to Known Proteins			TTTAGTTCTATTCGCCAAGACGCCAACCAATACTTGACCCCTTAGATGGAAATACAACTTATTGGATCTGTCTCTCTCTCTCTCTCCCCTCTTTTATATTGGAGATCTCTTGAACATGAGAAATTTTTGGGTAAACCTGAACCATAGTGGGGTTTTCAGTGAATAC
GmaAffx.40079.1.A1_at	BE659417		0	No Homology to Known Proteins			GGAACTAGGAACAATTACACATAAAATTAATGACTCTGTATGACCCCTTTGGTGTATCCTCTCTTTGCTTACCCACCCTTCTATTTCAAATAAAACCATTACTTTGACTACAGTAGATTTCCAAGATCAAAGATCAAAATTAAAATATGGAATTTGCATTGTTGGATTTGGAGTATAGTGGTTTGGTGTCCTTCACTTGCTAGTTCTAAACTTT
GmaAffx.3851.1.A1_at	BE820548		0	No Homology to Known Proteins			AATCTTTCAAACTTGCATAGTGCTCCTCTTTGTATTCAAGGATTGAAAATAATGACCNNGNNTNNNAAATGAGTTCTCTCCTAAATGCCATGTTACTGTTTGCCGCTAAATTTTGTAATTGTAATATGTTCTTGGCAGATGTAATTATTCTTTTATCGGTTTATAGGCTGATGAAGGTTTTTATTATGATATTTGTTAAGCTAGAGGTTTGTAATGTTGCTTTCATTTTCTAACTTTTGGCATCCTTATTAAACAAAATTATGTAATTTGGCTTGTGATTGGATGTTACATGATGTCTCTCA
GmaAffx.38936.1.S1_at	AW101501		0	No Homology to Known Proteins			TCGAAATAATTGTAGGACTGATCCAATTTTGGAAGAGGTTAGAATCAAGATCGACACTTCTCTCATGGTTCTTAATTTTTTGTTGTGTTTTTTTGGCACTGCCTGCTTATTCTTAACAATCTAGTGTGGCAACGACTACAAGCTCCAAGGATTTGGAAACTGCTTT
GmaAffx.37221.1.S1_at	BM523361		0	No Homology to Known Proteins			TAATATTGTACTAATAGGATCCTAGTAGCTAGCTAGCCATGTTCTCCGCTGGCATAATATTATTGTCTGTTTGCCATGTGGCTTTAATTCTGGCTCTGTCTCGCGTGTTAAATCGTGTAGCTACTCTGTATTCTTGT
GmaAffx.41216.1.S1_at	BI470523		0	No Homology to Known Proteins			AAATAGCAATCGCAGCTGTCAATATCATTGTAATTCATCAAATCTTTTAGTTCTGTCCTTGTATTTCATGGCCTGGAATAAACTCACGTTACA
GmaAffx.42322.1.S1_at	BI424151		0	No Homology to Known Proteins			TGACGGAGTTAACCACGCCGGAATGGGCGGCGTCGACGAAAAATCGTCCTCCTCCGGTGGAATGAGTTCCGGCAAGAAAGCGGGAATAGCGTTGGGAGTTATCATCGGTGCCGGAGTGGTTGTGTTGGGAGCGCTGGTGTACAAGAGGCGCCGCCAGAACATACAACGGTCTCAGTACGGATACGCAGCGAGGAGAGAACTTCTGTAGGTCATAAACATTCAGTAATGTTCTAGTTTTTCT
GmaAffx.42516.1.A1_at	BU546094		0	No Homology to Known Proteins			GTTCGTCAACTTTGCCTTGTATTTATTTGTTGTGCGTTTTTTCGTAATCGTGTGTATTTCTCCGTATTTTTCACTGATATATTCCGTATTTTTCACTGATATATTTTCGTGTGTATTTGTTTACTTGGTGAGATACGTTTACAACACGTATTAATTCTTTTTAGTTTGATTTAATTATTTGTTGTTTTTATGCTATTAATAATTGTTTCTAGTGTTTGTTTTGCAGGGAATATATCTTTGGTGGCAACTGGCAAGTGGGGGGGCCAACACGGGACACGATAACGCATAACGGGATTGGTTGGATCCAACTCCAAGAACAGGATAAAGCTTTGTTAAGATTAGAGTGCAAGACACAATGTTTATCATCATCAATATAATCATATAATGATGCACCATTAT…
GmaAffx.42570.1.A1_at	BU549067		0	No Homology to Known Proteins			AAACAGCCATCACTGATCTAATTGGCTTTTTAACTTATGTTCTAATATGTACGGTGTAATTTAATTCTCTCCTCACTACCATGTCTATGAAGACTTCTTCCCTGATCTTCGCTCCAACTACTAGCATTGTTTTTAAAATTTCGAGTAAAGGGTGTGTTTTCATTTACAAATTTTAGTCAATGCTATTAATGTCTTGTTTA
GmaAffx.42697.1.S1_at	AW757026		0	No Homology to Known Proteins			TATGATAGATCCTTTCTTTAGCCCTTTTTTTTCAAGCATTTTTCATACAGAAATGCTTGTTACAACAACCCTTTTGGCCTTGCTACTTGAGGCCACTTCCTTTATGCTATGGTTCCGTGAGAAAACCTTTACTATGTCTTGGTTGATGGTTGCCTCTAGATAGATAGTACATTGTATATGTTGTCGCTTTTGTATTGTTGGATGTTGCACTTGCTCATACTTACGCTCTTGAA
GmaAffx.41441.1.S1_at	BI945114		0	No Homology to Known Proteins			GGGCTTACTGCGACTTTGTTCAAAGTTACTTTTTACCTTTTTCTTTTCTTTATTTTATTCCTTCTAGATTATGTCCTCTGTGTTCACGGGTCACGCCTGTACCTAATACACTAGGAATTCGACTAAA
GmaAffx.41482.1.S1_at	BE658054		0	No Homology to Known Proteins			GCTCCTCCGTCTTGGAATGGTCCAGTGTGGAGGAGAATGAGTTGGTCGTTCCTGTTGGTTTCTCTCTGCTCGTTTACGCTTGGAAACGCTGAAGGGGTACTATTGGAATTTTCGATTGGTTTTCTTCTGTTATGCACTGCTAACTCGTTAGAATTTAGGATGCATGTGTGTGATATTTCCCCCACTAACCCATTCGTTTCGTGGACATACATAATTAGGGATTGAATAAGTGGAATTAGAATGTACAAGCATAAGCATGTGAGAATCTATTAGCGGATTCGAACTTGACCATTGATGTTACAGATTCTTCTTTTGGAAGTAGATGGAACTCTGTTGTGAGTCTTTCTTTTTTTTATCTTTGTACTTGGTATCTGGTTTTATCTGGAACTTGATGCCATG…
GmaAffx.41489.1.A1_at	BI970248		0	No Homology to Known Proteins			GACAATATAAATTCTCCATGATGATGATAATAACCTAACTTTTTTTTAGGGGGGGTTTTTGGGTTACTTTTTTTTTTTTTGTTAATCTTTCCTTGTCAATGTGAATTGTAATATTACTTAATTTGGGGGGTGGTATAATCAAAGAATTGGTGGGAGAAGGTGTAATTTTACTTGTTTGCTAATGTAAGGTTTTAGAGACCAGTAAGTAGTTAGTTTGTGTGTCATGTCATTAAGCTCAAATGACAAATTCAAGAGGGGGATGGAATTATTGTTACGTCCCTAGTCCCCTGGTATAAGATATTAATG
GmaAffx.41532.1.S1_at	BI973656		0	No Homology to Known Proteins			TGATTTTCATACTTCAGCTCTCACAGTCATTCTTCTGCTATCCCATTTTCCCTTGCAGTTCTTTATGGATCCTTTTGTCGTGCTATTAGTTTCTATGGCTTTTTTGGTTTGCATTTTGTTTTCATCATTGAGGTTTTGTATCAATTATATCCTTTATTGACTATTATATGACCTTGGAAATTCATATGTTCATGGGTTTAATACATCATTTG
GmaAffx.41710.1.S1_at	AI416911		0	No Homology to Known Proteins			TTGGATGAGCATTGAACTGAATTCGAAAAAACCATTCAGTTTCTGGGATCACAATTTACCAGCTCTTGGGAAGATAACATAAAATTGGAATGTTACTTGAAACTCCTCCACCATATCCCACAAAACAAAACACAAAAACGGGAAAAATACATTTATTCAGACCCCCGTGTACATAAATTCTCTATTTCTTTCAACAGTTTGGTTGTTTATTGTAATGTAGTAGTGGTTGTTTATAACATGTCCATGCAAGACATGTTTTGTTAATGTGACTACTAGCTTTCAACTTATCCTTTCATGAGAACATTTTGTGTTGGGGGGGACTCTTGCAAGAACACAAGCAGAAGCAACTTGCTATGTGCAACTCCTTTCGTTCCGTAATCCACTCTTGACTTGGTCTTT…
GmaAffx.41908.1.S1_at	CD412825		0	No Homology to Known Proteins			TATGTGGGCGTTGACTGTGCCAACAGGGATCATAGGGTGAGGGTCTCGCTCATCCAATCATTCCTTTGTTATCTGCACTAGTGAGTGTCGTCTTCTGATAAAACGACGTCGTCGTCACACAGCCTTGGTTAGAAGAAGAAGAAGAAGAAGGTATGGGAGACATATTCTACGGCAACGATGACCACCGAGAAATGAATGATTGTATGTATAAGGAGGATGTGATAGAAAGCATGAGAAAGCAAAGGGAAATCAAAGAACTCAAGCGCAGACAAAACAACAACAACTACTGCTGCTGCTACTTGTACTTCCTTCGATGCTTTGATGACTTTCTCACGCTTCTCCGTGCTTTCATCAACTTCTGATCGATCATCCTTTCATCTCCTTGTGACTAGCTAAGCT…
GmaAffx.42109.1.S1_at	BQ080704		0	No Homology to Known Proteins			TGTTAGTCTTTAAATGTCTTGTAAACATAGCTCTAGATTTGGCTACCATCGTTAATAGCTTGATATCCTGTAAAACTAGCCCGAAGTATTTAATGTTCTATAG
GmaAffx.25674.1.S1_at	AW395881		0	No Homology to Known Proteins			TGAAGTCCTTTCAAGTACTCAGTTCATTGTAGAGGATAGATCATTCCATGGATCATGTCTTTTCTTTTAGTTTTTGGCTTTGATATTCTCGTTCTTTGATTTATATGTTATGTACATATACTATTTACTGACATTA
GmaAffx.19097.1.S1_at	BM522846		0	No Homology to Known Proteins			GCGTGGCCATGGGAATCTCATGTATCCCTATTCTTCATTCATGTGACAGAAAGCTCTACTTTTAATGGCATTGTAG
GmaAffx.22150.1.A1_at	BE823303		0	No Homology to Known Proteins			GGGAAGTGGATATCTGTTCCATTAGTTATTGTTGGATTCTGGTTGATTGTAATTATTACTTCTGCTTTAACATGCCTTTTACTTTTGTTGAAACCTTATTATGTCTGTTGAAAATTTGTAATTGAGATGTTATAGTAGCTGTCGTTGGATGGTTGGTTGCGATGTCTCGTCGGTGGTGTGTTTTATTATTGCCAAAAAAGATTATTGTGAACGTGATCGCCACCTTCGTGAGGATGGGCGATTTATGCCCCAAACCAA
GmaAffx.23256.1.S1_at	AW102490		0	No Homology to Known Proteins			AATCACACTGTCCAATTATTCTCCGGAACTGTAGAGTCCTTTAACAACTACGAAAATGGGTCACAAGATTTCAGCCATGCAACGATCAAGAGCTCTAGAATTGGGAATTCCTTCAACAACCTCGGATCGGGATTGCAAACTTTCAGGGGCGCTGAGATTCGCTGTGTTGACAAATCTAGAAGCAAACGGGTTGCGTTTAGTTTACCACCTTGCTGGAAACCAGACCGTGTGGCCCACTCTGGAACCGTTAACTCCTTCAACAACAACGGAAGCGGATCTCAGACTTTCGACGGTTTCAAGTTTAACTGATGTACGAGGTACTCCTGTTGTGTGTGTGTTCATATGTGTCTCTGCTTTCAATTTTACTTTTTTCCTCTTTTTTTGCTGGTGCCAGTATTT…
GmaAffx.23747.1.S1_at	BM525349		0	No Homology to Known Proteins			AATAGTCCTTTCATCTTCAAGCCTTGCCACTTCCCTGCTTCAAATCAGAGCCATAAAAGTAAAGCCCTAGATCTTCAACTAGGCCTCAACTTGCAGTCAAATACAAGAAGTTCCTTAAGAAGGATGTAATTTAAGTATATATAGGACACATAAGTTAAATTAACAGTTTCCTTGAATTATTTTAATGCATCAATTCTCAAACATCTGGAAAAAGGAAATGAGAAAAGGTAAAAAAAAAATAATTACAATTCATTAGAGTTAGTTGGCCTTGGCCACTGCATAGCCAAGAAGAGTCTGACAATGACCACCTTTCAGAATTCAGACAGC
GmaAffx.24874.1.S1_at	CA935208		0	No Homology to Known Proteins			TTGATCCTACTTCTTTTTTTCTATTTTTGTTGTGCCATGTATTGTTTCTTTAGTTGGATATTATGCTATCAAGTTTTTTGCTTTACACAGGGTCAGATTAAGAATTTAGAAAGACCTAGAGTTCTATTTGTATAAATCATTTGCTATTATTCATATGTAACCTGAACCCTTTTATGTAAGCAATAATTATGACGTCTAAA
GmaAffx.30010.1.S1_s_at	AW164239		0	No Homology to Known Proteins			AAGTCTTCCAATTAATGTTTGTTGTATTTTACTTTTATCACATGCATTGATGTGAATGATCTCAGCCGCCCATTTCATTTGTTCAAACTTCAACCCGTAATTATTCTTTCAGTTTTAGTTTAGTATTCTTCATGTTTCA
GmaAffx.302.1.S1_at	BE659120		0	No Homology to Known Proteins			TAGTTGTATAGGGTCTTTAATACCTANCTGTTGGCTCTTCGAATTTTTACAGAAGATGACTTGTTAGATTTATCAATTGGAAAATGAGTTACACATATTATGTGTGAATATGTGTGGAATCTAGATCATGTAGAACAAGTTGCAGTGGTCTTGTTTAATGACATGGAGAGCAGTATTTTGAGGAGCATGCGAGTAAAGTATGTGCAACTATCATTACTTTTATTGAATTATTATGTATAGAGTTGCCGGGTTCGGATTTTTGAAGCACGTTGTTTTCAAATTTCGACCGTGTTGCAAATTGGATAGTGTGTGTACTTGACTAATGAGGAGATTCTTAGGGCATACAACTACAAAGGTGAATATTTTGCAACTTGCATGAGGGTGAAAGATTGCTTAAGT…
GmaAffx.30674.1.S1_at	BE057315		0	No Homology to Known Proteins			GATTGCCAGAAATTAGGGTACTACTATAGTGCTATCACATTTCAACAGATTTTTATTTGGAAAATATTTTAATTGCACCAATGCCGTTTGCTTATTGGTTCTGATAA
GmaAffx.29585.1.A1_at	CD397532		0	No Homology to Known Proteins			TCGGTGCTTTTCTGACTCCCATCATCTTCTCATGCTTTCTGATTCAATAATTTGAATGCGTGTATCGCTATTCACTCTGTTTTTTTAGGATTTCTTTTTCAATGTTGGATAGTTTGCTGGAACGATCTTTTTAATTTGATATTTGTTTTTCTAATACTTCACTCAGATCGACGTTCATAAACTGTTTTAGTCCTTTTGACGCACATTCACAAGTTAGGGTTTTTGTTAGTACCATCTGCCCCACCAGTCATTTCGTGCTTTACCAGTTATCTTATCTGGGAATATCTGCT
GmaAffx.28683.1.S1_at	BQ742756		0	No Homology to Known Proteins			GAGTGACTATTGGTTGATTATGGTAATGTTTTGTTTTGTTTTGTTCACTGTTCTGTCTTTGATGGATTCTGTTGTAACTTGTAATCACCTCTTCCTTTTACTTAAGCTGTGATTTATATTGGT
GmaAffx.27322.1.S1_at	BG551531		0	No Homology to Known Proteins			GATGTCTGATTATTGTTTTACAACACCATTTGTCGACCTTGTTATTTTATTTTATTTTTGTTTAGGAACTTTGAGTTTTGTTGATAAGATNTGTTTGTGTTTTGTTGTTTAAATTGTTAGTTTGGTACTTGGGGACTGGTTAGTGGGTACTTACTCTCTCTGTCGCCCAGAATTGTTGTTAAGAGATGCACACGTTGTGGATGATTCTGTCATGTTTGTGTTTC
GmaAffx.27632.1.A1_at	BI969421		0	No Homology to Known Proteins			GGAAAAACACACCTAAATGAGGCAAAGTTAAAGGAGTCTGATCTAAGGAATCAAGATGATTAAGAAAAGCAAAGGCCCAGTAAGAGAAATGAGAAAAGAAAAGAAAGTTTGAAAGTACTCCCTCATGCTGTCATATTTTGATCCGTGTATAATAATAAATGCCATATTGTATTTGTCATATTTTGTATAATAAATGTCATATTCATCTAGAGTAGAGTCTCTACTCTCTACTTAATCCAAGCCCAACTGCAAGTAAGATTTCCTT
GmaAffx.32692.1.S1_at	BM522511		0	No Homology to Known Proteins			TTTTTGTCTGGTCAATTACTGATAATCTTTCAGTAAATTATATATTTGGGGATATAGGGTAACGACGATCATTTTGATAACGAACCCTTGCATCTGTAACAAATTTAATTGATGCTGAATTGAGGCAAATTCAATGCAT
GmaAffx.33129.1.S1_at	BQ611705		0	No Homology to Known Proteins			GCCTTGAAGAGTTGTATTTGTGTGCTTGTATTTTTCTCTCCCTCTCTTGCTTTTTCTTTTCTCTTTGGTTTATGTACTCTTTCTGTCTGAACAATCAAGACTTTTAATTCATTTAAGTTAAAGGAGAATTAGCATTGTGGTGTGATATGAATGTTTGGAATTTGGAATTGTATGAATCAAGAATATGTATGTCATTTACAAGAGC
GmaAffx.33527.1.S1_at	BU761195		0	No Homology to Known Proteins			AGAAACTGTAGAAGCCTGTCGAACAGTGAATTGTAATAGTGGTAAAATGAAAGAATGAATGGGTATATATATGTGTGGGAGTATACAGATATAGATATAGATATGGTGGTGCAGCTGTGGTGATTTGGCATTTTCTGGTTTTTGTTCGGTGCTTGTTGGTATTGGTTGGTTTGTTGGTTCCATTTGATGTTTACATAGAGGAGCTAGCTTAGCCACTTTCGGCAAAAGAACTCACAGAGATACATTTACACAAAGAAAGAACGCGTTTACTGTTTAGAGACCAAACCCCATCTTTTGTACCACTCAATGAATCATTAGTCTCATACTCAAACTCTGAAAG
GmaAffx.34020.1.A1_at	CD405933		0	No Homology to Known Proteins			CACTAGGGTTTTGGTCCTACTCTTGTTTGTCTTTCTCTTTCTTGTTTAGTTGTTTAGTTTTCTTTTTCCTCCTTCAAACTCTCCAAGGGTGTACTGTTTTTAGTTTTTATTTTGCTTTGCATGTACACTTGTATTTGGCCATATCATAGGATTCTTAGGATTTGGTTAAATTGTGATATGCGCCCAACGTAATGACTGATTGATCAAATGGCTTTGTGTATTACTCCTT
GmaAffx.34085.1.A1_at	CD418272		0	No Homology to Known Proteins			TCCAATTGCCAAGCATAGCAAGTGTATGAACAAGTTTTGTTTCCTCCCATGTCATGGTCCTGAAGAAATGGCCTCAAATGGG
GmaAffx.34759.1.S1_at	AW318036		0	No Homology to Known Proteins			CTTTTTATATTTACTCGTCTGATGTTTTCGATTTGATTATTTTTGTTTTGACGGAGGAACAGGATGTGAGTTGTGGTTTTCTCTGTGATGATGAAAACGATGACNAGTCTGATATGATATCCATTCCTTACAATACTGACGACAAATCGANGCATTTGTCTGAGAGGATTCCACTCTTTCTCCCGTCCTTTATATTTGGGTTGTTTAATTTTTTGCGCATGGTTTGTTGTTTCGATTGTTTGTATTTTTTGTGTTTTTTTGAAATTAGGCATGGTGATG
GmaAffx.36061.1.A1_at	BM142770		0	No Homology to Known Proteins			AAGCTAGCAATGCTGCAACAGTGCTGAAATTGCCAGTGATATCAAGTTACTTTTGTTCTTTTTGATGGGCTTCGAAAGTCACAACAAGGGAAAGACAAAAGCGGTGGATGGGTCAAATTTTTACCCTTTTTTATTTGGTGCTTTAGGGTAAAAATAAACAAAGCAATTTGGAAGGGGCTGGACCATATTTGCAGAGGGATTACGGCTCCTTCCAANTGTTNAATCACAGNGGAATCATTTNGGGGGAATACTTGTCAGAAGTAACATCTGATTCCAACCTGTCCACCCGCATTACTTTACTACAATAAATAATAATGCAAGGAATTTTCACTATCTCGTTTTACATTTGTGAAA
GmaAffx.36294.1.S1_s_at	BG652547		0	No Homology to Known Proteins			AAAATGACACTGCTGAATAAACCAGGAAGCTCTAAGTACATTCCCATTGAGGTGGTCTAGCAAAGGAACTAAATCAAGCAATAACGTATTGAGATCTCCCATCGATGGAACAGCTGATCCTAGAGACCTGACACTTATGAAGTGAATCCTGGATTTGTTCATTGTCTTTGAACATTTTTTTACTTTTCAGCATTCTGGTGCACAGTATTCATTCTTCGG
GmaAffx.36820.1.A1_at	BI967487		0	No Homology to Known Proteins			GAGTTTCACCACTCAAAAACCTCAACTCTCTCTGATTTTCCATATTATCTGCTGAGCATTCTCTGAAGTCTGACCTATGGTTATAGATTTTGTTTTTTCTTGTTTTCTTTTTCTTTTCTTTTCTTTTTTTAATTTGAGTTGTCACTTTTTGTTTAATCCTTATATAATTTGTTTAAGGTTTTTAGTTTAGCATAAGTAAGTTGTTGATGAAGGGATTGCTAGGGATATGTTTGCTTGATATTTTACATAAGGGTATGTTGACATCATACTGCTGATGAGTGTAAAGTCA
GmaAffx.36823.1.S1_at	BI967614		0	No Homology to Known Proteins			AAAGCTTCTCGTTTGGAGGACTGATAAGCCTCAAGATGATATGCCTCAGACACCAAACTCACAAGTTACAATTGTATCACGAGACCATCCACGTGGGGGCAATTATTAGTTGTAAGTTGTAACATGCTGATGCAGCATATCAGTTACTGTATGTCTCTTCAGATGTGATGAGATATATGGTTACTTAATGTTTAGTTTCTCTGTGTCCCGGTTAAGTTTTCGTTTCTATAGAAGATAGAAGCTTTAGTTGGTTAATTATTGAAGTGAAGTTGTATCCTCATGATGCTTTCTCTTTCACTTAGGGTGTATATATGAAAGNTTGTAANTTAAACTNCTTGTAACAGTATGTAATGGTCAATTAATACGTAGTTTTAATTAGTTGAGGCATTGCAAGTTGCAA
GmaAffx.32629.1.S1_at	CA784365		0	No Homology to Known Proteins			AAAGGAGGAGAATTTAGTAGGCACGGAGGCTTATGGCATGCAAGAAATTGAAGAAAACAGAATTTAAGAGCAAGAGTNNNNNNNNNNNNNNNNGNNNNNNGNNNTNTTTNTNNTTTTNNNTTNTNNTTCAGGNTGAATTATTCATTTTTTTTTTNGGNGAGTTATTTATTCATTATTTTCACACCCAACGAAAATGCTATTTTTTAATTTTGTCCCCAATTGATATAAATATCCCAAGGAAGTGGAAAAGAGTGTTATTTATCTTTGACANANNNNNNNNCTTTCTAGATGCCGTCAGATTTCATTGTTTCATTGTAATTTTTTATTTTTTTTTATAGATTATCCCTCTTCTCAG
GmaAffx.35147.1.S1_at	BE057270		0	No Homology to Known Proteins			AAGTATAGGAACTGTGGCTTTCATAGGAGTTTCTCGTATTTGGTTTCGCTACCCCCCTTTTTTCTTCGCACTCAATATTCCCATCAATCATGACTCTTCATCAACTTTATTATCTGGGAAAGATTGCAAGTTTCATCCCCTTGTGTGCTTACTGTATCAATTAATGCTACTTATAATAAAAGTGCATTTCACATCAAA
GmaAffx.35331.1.S1_at	BI967623		0	No Homology to Known Proteins			GTTTCTGCATCAGAGTGCGCAAAAGCAAGAGCAAGGAAAGCAAAGTGAAAGATTTAGAGAAACTCTCCCATGTCAAGCCTAATCACAAGGGAAAAACCAAAGGGTGTACTTCAACAACTCCTGTTGGTGATGGTGGTGGCATCAATGTTCATGGAGCCAACACAGTTGCTAACAATGATGTAGGAGTAGCTGCTGCTGAGATGACTGCAGCTCATACCTCTTTGATGAGTGCCAATGGAGTTCAAGATGGAAGTGGTCATGGTCAT
GmaAffx.35625.1.S1_at	BM143354		0	No Homology to Known Proteins			GTGCACTTCCTTTTATCCTTGAAGTTCCCTTTTTGTGCTTTTGGTGCTCTATGGGTGTATTTCTGTTGCAGTTTAATTTGGATAACTATCAACTTTGGCGGTATCGAGCTATTTCAATTTCAGTCTTTAGTTGAAATAAGCATGAATGTTTGAAGTGAAGCGGACTCCAGTTTCTTNNNNNNNNNNNNNNNNNNNNNNNNNNGTAATGTCAGTCAAATAATATGCGGTAG
GmaAffx.71875.1.S1_s_at	BE583850		0	No Homology to Known Proteins			AACAACAACCAGGTGTGGCGCATGATCCCGGCGTCTGCTACAGCCGCGACGGTGCACAGCTCCAGCTCCAGCGACGCTTATCTGCAGCCGACCTCGACGGACACGGTCGTGGGAGCTGCATCGACCGGGAAGTCCGAGCAGAACTGGTTCTGGGACGCCAACTCGAACCGCTTGATTTCCAAGATCAACGCGCAGTGCCTGGACGCTTACAAGCCTGGCAGGGCGGCCGCGTGCACACTTACGCCTGCATCGCCACCGAGGGCAACCAGAA
GmaAffx.72769.1.S1_at	BG511483		0	No Homology to Known Proteins			TGTTGCGTTATCAAAAAGTTCTGAATGCTTTTAATTTGTATCAGTATTTGGAAGAATTAGGAAGCTGAACAATCTATTTTAAGCCTACTTCATAGGTTTTTCAACTGAATTTACTGGGGAAGATTGGATAACTATGCCTGCGCCCTGTTT
GmaAffx.73090.1.S1_at	BF423877		0	No Homology to Known Proteins			TGATTCAATATCATCCGCGCTTCTGAGGTTTCNCGATGAAGCATAACGGATCAAAATGGTTGAATTTCTTGATATGAGCCGTGTTTTTGATTTGTAAATACATGTGAAATTAATTTTGGTTGTACTTTTTTTTGTTTGTTTCAATTTTTGGTGTGATGGTTGGCTGTGAGGATAAATGTTTCAGCTTTAATGCCAGTTCTGCTTCTGAGAAATCGTGATTGATAGAGCTGTNATATATTCTGAGTCCGTATTTATGAAACTGCATCAAATATTTCTTTTCGAATGTTGTTCATGCGTGTATCTGTTTTTGAACTTTTGATATCAAATTGTATTAATTGCGTGCTTTGCGTTTTATCTTGATGGGATGGCTATTCTATAGGGTTACA
GmaAffx.74015.1.S1_at	BM139786		0	No Homology to Known Proteins			ATCTGCTCCATCTCTTAGTCCTGAAGCTTCCTCTGTACTTCCTTCACCTTCTTTGGCACCACTGTCTGACATAACCCCTCCTCTTTTGACTCCATCATCTGCAACCACGGGAAGTGGTCGTTCTGATCTGACTCCATCTTCTGCCATGCCATCTTACCGTTTTCTACCTTCAGTTGTGTTGATTGCGTTAGGATTTGCTGTTCTTAAACACTATTAGGTTGCCGTGCCTTCCACAATTCCACATCCTTAATTTGTGGATGCGCATGTACCTAATAGGTTTGCAATATGTATGGTTGTTGCGTTAGGTTTTGCTGAGCTTGTTTCAGACCCACATTGG
GmaAffx.75481.3.S1_at	BU091049		0	No Homology to Known Proteins			TAGTTTTGGGTGTTGCTCCCATACACCATCAACCGCGGACTTGTCCCCAAGGG
GmaAffx.75745.3.A1_s_at	CD399720		0	No Homology to Known Proteins			GGTACTATGTGAGTTCATTTTCCTTTTTTCATAAACTTAATGAAAACTGTACCATTTTTACCGATGAGCCTAGGGTGAGTGTAAGAGGACTTTGTGCATGTTCTTTTTA
GmaAffx.74601.1.A1_at	BG405637		0	No Homology to Known Proteins			TGAAGACCCTAGTCTAGTACAACATATCATATTCTTGTTAATTAATTACCTTTTAAGAAACAACTATTGTAGCCAGATCTAGAACACAAAGAAAAATACTCTCTTAGTCATCATGGAAAATGTATGGCTCTTTCATGGTATTTCGTNGTTTGGTTTGATGGTGCAAGGGACCTAATAAAGGATACTAATGATGATGATTAAGATTATGTTTATAGACATTAATTTGTATGATTGGAAATAAATGTGTCTTGTTTAAGGAATTTGACATTGACGGTCTCATTATTACGTGGGACAGAGCTATTGTAGTACCATGCCAATTTTAATTACTGTATGACTGTGTATGTTTGATTTACCGTT
GmaAffx.74827.1.S1_at	CA802422		0	No Homology to Known Proteins			GGTCCTGCTTGAAAACAACCCGATGAGTAGGACATGCTGCTGCCAGTGCAAGGCGATGACAGACTCTTTCACATGGCCTTTAATTTGCTCAAATTAAATGGAGCCATGCTCCCTGTAAAATTCAATGCTCTAGATTCTGTTGGCTTTACTATTGGCCAAATATGTTCTTTTCACACATGTTGG
GmaAffx.76231.2.S1_at	BI942390		0	No Homology to Known Proteins			AAATAAGATCTTCCAACCGCACCCATATTAGGACATGTAGGCAGTATCGNNNNGNGGTGAAAACAAGTAAAGAGGCACTTCCAGCACCGGGCAGGTGTCAGACTCTAAACATTGTGTTACCACTTAGCAGAGTCCTGTGTTTTTAATAAACAGTCGCTACCCCCTGAGAATCAAACACCCAGCTCATGATAGAATAAAGAGACAAAGCCATGGGTCTCCAGCAATGCTGCCGTGTCATGCAAACCCTGCAGCATCAACATATGTTCTGTTGATCACAGGAAATAGCTGAGACATTGATAGCTTCCAGTTGTTTTTACTCCTGAC
GmaAffx.78064.1.S1_at	BM270751		0	No Homology to Known Proteins			CAACCAGCAAATGTTGTCTTTTCTGTATGGATGTATAATTTAGCTGTAGCATATAGTGAAACTAATTTAGCCTTCAATCCTATTATTTTGTTGGGTTTGTTTGTCTAGGTTTTAATTGTGTATAATATGTAATCTGCAGCTAGTGCTATGTGTGATTATCCTTTGCATATTTAAATCAAATGCCTTCTTTGTTTCTTTTATTCTAAGCTGTTGCTTGATGTAATTGATT
GmaAffx.784.1.A1_at	BE822911		0	No Homology to Known Proteins			GATTCTTGGATCCATCACTCTAGGGGGTTGTATTTATTGGGAAAATTTACCTGCCCTGGTTATATCCTCTGTGTGTCGCTAGTCTTAAATATTCAGATCCTGCAGATAAATGAGGATAAGTTGTTAGCCTCCACAGTTTCATGTTGAAGACAACACATGGGAAAATCTCCAATTGCTTTGGTCACCCATGACTTGTTTGTGATACTGGCTAGTTTTTCAGAGTATATTAAAGTTTGTTCCAAAGAATTTAGACCAATTTATTTATTCCTGTAGCT
GmaAffx.78465.1.S1_s_at	BQ081690		0	No Homology to Known Proteins			GTTATGCTTGGCTTAAAGATTTGTTTATTTAAAGGTGTGACTTTGGCTTAGGAGACTAGAAGAGAAAATAGATGAGGCATGCTTAATAGTTTGTTTAGTAATTTGTAATGCCTGTATTCATTTATGG
GmaAffx.78551.1.S1_s_at	BQ298588		0	No Homology to Known Proteins			AAGAGTGCCGCGTGCCATAATTTCTGCTGGATGTGTGTCTCTTGCACTCAAGTTACTGTATATAGCACCAACAGAATGATAAGTAAAAAGAAGTGAATAATAAAAATTAAAAATAATTTCTGAAAAGAGAAAGTGAAGGAGATTTTAGCTTTCTATAATATTTAGCTTGTCATATAAGATTTCAGCTGTATTC
GmaAffx.81908.1.S1_at	BG726207		0	No Homology to Known Proteins			CAACGTAACTCTTACGTTCACCATCCATTCAAAACAAAAGAACATTCTGTGTGATGGAATCAAAATACTAACGTAGTCAGAAAAGAAAGAGAACTGCAGATATTACAACGTACACAAGCCAACAAAACCACA
GmaAffx.8278.1.A1_at	BE820944		0	No Homology to Known Proteins			AAAATGCTATCTCAGCTTTGTCAACCATAATTAGCTCCCATCTAATATCACAGGATTAGAGTAAATNGGTAGGAACACATNTGACCAGTTTTGTTTAGAAGGTATTAGCTTTTATTCTGAGGCATGCTTTGACAGAAGTGAAGAT
GmaAffx.8295.1.A1_at	BE822089		0	No Homology to Known Proteins			GTCTTTTGTGGTGTCATCGTGTTTTATTTTCGTTGCCTATGGAGTATGTATGCAATTTCTATTCTACCTATGTACTTGCAGAAGAAGTCTTTTAGGCCAATT
GmaAffx.83018.1.S1_s_at	BQ080486		0	No Homology to Known Proteins			GTAGGGAAGAACCTTGGCATGATATTGATCCATTATTTGATTTCCGTAAGATCTATAAAAGCGAATCTTCAGT
GmaAffx.83175.1.S1_at	BQ611010		0	No Homology to Known Proteins			AATTTTGCCGTGTGGCATTATTCTTCAGATTTCTTCTTTCTTCATGGTCCATACAGCTGAACAATTTTATTGAACAGGCTAGGGCTGGAAGGAGTTTGTATAGTCTTGGACTCGTGTACATATGCTCATACTTGTATATA
GmaAffx.83261.1.S1_at	BM519784		0	No Homology to Known Proteins			AGATGAAGTTGGTTCTTCTCGCTCACAGGAGAGGGTACTTAGGACAAATTCAAGTGGTAGGAATGCATACCGTCCAGGAGTAGGGCGTNGCCGACACTAAGGCCCTNATGTTTCTNNANTACCCGACTCCCAATTAACCATCCACCCACCTCTCTGCGCTCTTCATGTTAGTAACTGATAGTGTGTTTCTTCTTCCTTTTCCCTATAGCTATATGATGATTTTGGCGGTGGTTTGCTTCTTTGAAAAGACTGAACAATATTTGTGTGTAAAACGGTTGACCGAACTGGATCGAAAT
GmaAffx.80078.1.S1_at	CA935461		0	No Homology to Known Proteins			AAGCACAAGCCGCAATGTTGGTTGGTTGGTTTTGACACGTTAGTTGCCTTTTTAATTATGATTCANNACTNANNGACCATAGGCNAANNNNACAGAACATTNCCNCAATGGNNGTGNNNNNTGACNNNNNNNNCCATGCTTGGTTTCTTGGAAGNTCACGAATTAGATTGTGTTTTNGNGACTGNATTGTATGTGTGATAAANNNNNNNNNNNNNNNNNNNNNNNNGACATGTTTGCACATGTCACGGTCNTATGCGTGCATGNGGTTATATTTTAGTGGCATAGGATTCTNGAAATATGGTCANTGGNGAAACAGATGGTAACTCCTGATAGCAATTNCAANTGCAGTGTTTGTGGTCGGATTGTATA
GmaAffx.80190.1.A1_at	AW349873		0	No Homology to Known Proteins			TGAGGAGTATGCTATTTTGGTGGATTTTGTTAAGTCAAAGTTACCATTTAAGAATGTTTAACTTGCTAGGGCGAACATTGTTAAAGGATATGATTGTGAGCCAAAAGTAATGTTCACTCTAAGGACTAAGGATACTTAAACATTACGTATGTTTAACGTGTTAGGGTGCAAAGGGGCTCATTTTTTACTTATAAAAAATAATATAACTATTAAATAAGACATGTTAATTTTGGAAAACAATGAGTGTGATCACCCAATAATAAAC
GmaAffx.79282.1.S1_at	CA819015		0	No Homology to Known Proteins			GTTGCGAGCGAAGTCTTTCGCTATTTTGAAGATTGTTAAGGTTTATGTGATTCCTATGGCGCTCTTGATCATTTTCTATTTTAGTTGTGGTTTGCATGAATCAAAAGATTAAATGGGTATATTACTGTTCTTATTTACGGATAAAATCCATATTATAGACTCCTGATTGC
GmaAffx.79306.1.S1_s_at	CA820535		0	No Homology to Known Proteins			ATCATGATGCAAGGGCTGGCGGAATTAAGAGTGAGCTTGTTTACCAGCTGAGTGTTTGAGCAGGGATTTCTGGGTTGGTGGGCATTTTTGAGATTCTTTCTGCACAAAGTGATTGTCCTTTAAGCAAGATTTTATATCAGTTGGGCGAGGGTTTTCAGTTTTCTCATATTTTTCCCCTTCCCAGTTTCACTGGATTGTTTGTGGTGCACCTGATAGCATGTAAGATATTGCCTTTGATAGAAACAATTGTAA
GmaAffx.79325.1.S1_at	BU763860		0	No Homology to Known Proteins			TTCATAGCAACCAAGCCAAACCTTCTCCTGCTCCACAATCAAATTCCATCAATTAAACATCCCNATAGGCTTCTCTTCCATGGCAAATTACCATTCTTCTAAATCCTTGCATCTTCCATGCAAAACCTTATCTCTAGTTCTCCTTTTTGTTTACTTGCTACTTATTGGTTCTTGTGATGCAATAAGAATAGGCCAAACTATGAAGCTGNNNGAAANAAGAGAGATTNTCNNNNGAAAGCGCAATAACCAACATGGTTTTCCATACAAAAGCATGGTTTTCAACTTCTTCCCCAAAGGGCCGGTGCCACCTTCAGGTCCTTCAAAGAGGCATAACGCAGTGGTGGATTCAACACCTAATAATTGAAGTACATGAGAAGTCCTATTTGTTCAATTTTTCCA…
GmaAffx.79002.1.S1_s_at	BU761095		0	No Homology to Known Proteins			TCTCCTTTTTCCCATATTTTGGGAGAATGTGGTTATATATTTGTAGTCAGGGATGCTGTGATTTGTTACTGTTGGAATTTGTACGTCATTCCAGACACTTCACATATATTATAGGTTGTGCTTTGTTACT
GmaAffx.79413.1.S1_at	BG882356		0	No Homology to Known Proteins			CATATAGGGCCCCTTCTGAATTTTTTTATCAATTGAGGTTTGAAATTTTTTTTTGTTTTTTTTTATAATTATTTTGATGCTTTTTTTGTGGTTGTTTTTGCAGCAGATGTGTGTAGAGAAAGTTTATAAGGCAAGCATGGTGGCAATGAGGGGTAGAGGTTATTTGTTCAACGGGATATTGGTCCGGTTCAATAAGAAAGCAATGCTCAAAATGTTTTTGGGTCCTGTTTTTTCATTGAGCCGTGCCAATATCACGAACCACTGCTCTTCATACCCCTGAAATCTTCTNANNNNAGNTNNNNNTTCTGTAATATATATGTTTTATGGGTACTTCGTCGGTGTAAATCAA
GmaAffx.60846.1.A1_at	BU550268		0	No Homology to Known Proteins			GGTATTCAAATTATCTCCTCTTCTTTTGAATTTGAGAAACATTATGAAATCCCTCATGGCAACAATGGGTGGCTACAAGAAGATGTTGGTGTTTACAACAATTCTGCTACTAGCTTTACAGCAAATATGGGCATTTAGGCCATTAAAAGAGGATCAATGGTTGAAGCAGAGGCTAGTAATACAATCACTACACAGAGGCTCCGAGCAATATTCCGAAAGAAATCCATGCTCCACCGTTCCTGGGCGCAGTAGTCGTAGAAGCTGCACTTTTGTTCATGCAGCACCAACCTTACCAGAAGTTGCCAATTAGCAGCTTCTACTATATTATATTACATTATATATATTAATGGCTTTCTATCTCGTGAGACTCAAAAATATGTCTCGAGTTCTTGGTCGATC…
GmaAffx.60948.1.S1_at	BE058917		0	No Homology to Known Proteins			ATCATCATCACAAACATCGGCACCACCTGGATGATGAGAGAAATCACATGCAACAACACTCCCCTAAATTCAATGGAAAGCATGATGAGAAGTTAGACAAAACTGAAACCGATAAAAAGGATGGTGGTCATCATGAAAGTANAGCTATGGTCGAGAATAATGATGGTCAAATTGTTTGATTTTTGAGAATGAATCTGTTGTGGTNGTTCTGTACTGATTGGCAGCTGANNANNTGATATCCAAATTAAAGTTAAAGGAACAATTTCATTATTTATGTCGGATGTAANATTGTCGGCAGTTATTGTCTATGGAAACTTTGTTGGGTAATTGTTGGCTGTGAACATTAATTTGATCCTCATTCAACTA
GmaAffx.6134.1.S1_s_at	BU765221		0	No Homology to Known Proteins			GTATCCCAAGACTCATTATCCTCAATTGTATTATTACAAATTACATACTAGGTGTCATTGCAAAGCACCAGGCACAGTACTGACGCCTGTGTTGTTGATATTGATACTTTATT
GmaAffx.61480.1.A1_s_at	CD409997		0	No Homology to Known Proteins			TGGCCACCCTACATTCAAGGAGGAGTATGACCTAGGCTTGTCCAGTATTGTGTTTTTTTTTTCCTTATCTTGTTATCCTCTTTTCCACTTGTTCAAGTTTTGATTATTTTAGGATGAGAAGGGGTTTCTTTTTAGGAAGCTTTAAAAGACAATAAATTGTACAAAGGGTAGACACATACATGTTATTGTTCCCTTGAATCTGGGACCCTTATGTTTGGCCCATCATTGATTTGA
GmaAffx.62105.1.A1_at	AW350296		0	No Homology to Known Proteins			CCTACTCCCAATCATTCAGTGTCGAGGCCGGTGTGAAGGACTAACTCTGGTTTAGGTTAATTAGGAACTCCATGGTAGATTTGAAATATCTAGTTTACAATTTTAGTTGAAAAATCATGATCTGGTCTCAGTTACTTTTTGTCTCCACTGTCTTTTGCTGTTGTAAAATCTAATTCCATGTTACTTGGATATGCCTCTATTATATCGTTTGTGTCACGGGCACAGGGTGCAATCTGTTTGTGGATTCATGTTGTCCCTGTCCAATGTTTGTCTGCAATG
GmaAffx.60153.1.S1_at	BM523538		0	No Homology to Known Proteins			ATATATCTCTGTTTCTTCTATCTGGGAGTTGCTCTAGCAACAGTTTTTATTACTTTTTAATTAATATCCATCCTGATAACATTTCTCTTACAAACATCTCTGTGTGGACCATCTTAAAAATT
GmaAffx.66131.1.A1_at	AI960551		0	No Homology to Known Proteins			CTTGGTTTGGAGTGGAGCATCTAATTTTAGCGTTTTTCTTTGGTCTCGTTCAATAAAATGTGATTGTTTTTAGTAGTCATAAGTTTCATGGTGGGCCAAAGG
GmaAffx.66265.1.S1_at	BM269705		0	No Homology to Known Proteins			GTTTTTCTTTGTTGGGTGTCACTCAATTAGGAAAGTAAAATACAGGATGTGATGATTCTCATAGCATGTTGATAATTTTTATCGTTTAACTGATGAGGGTGTTTTAACACCATTTATTTATGTTGTATTAGTATATTTGAGTTATCTGCTCCATTTGTCCGCGACATGGGACATGGATTTGG
GmaAffx.66400.1.A1_s_at	AW310626		0	No Homology to Known Proteins			AGGTGAGGTTCTTCGTATGTGGCTTATTGGGCTTGAGTCAAACATGTAGATGTAGATTTTATTTGTTGTTTTTTTTGGCTAAGGTTTTGTATTTTTTGGGTAGTGTGTAGGACTCATGGTGAGTCTACATGGAGATGTTGAATTAGGATGTCTCTTGGTTGGATTAATTATGTATTTCGGTTCGATTAACTTGTGTAAAAGATGTGACTTTTTTTTTTTTTTTCCTTTTAGCAAAGTTATATG
GmaAffx.66492.1.A1_at	AW349357		0	No Homology to Known Proteins			GAATTATATATTTTACTGGTCACAAAACAATCAGCCAGTTGTCATGTACNNTGTGCCCTCTCTTCCACCGTTTAATTCTGTGCTTTTATAGAACATCTGAAAATGAATGATTATGGCATTGGTCTACTTCTCTAGGCTTGCAAACACGGTATCAATTTATCAAAGTTTTTACATCCAAATTTCTCTAATTTTATGTGGTATGCGGTATGCCACCTAAAGATCATTAAGTCAGTAATTTCGGCAGTGATTGTGTGTTT
GmaAffx.65661.1.S1_at	BI700358		0	No Homology to Known Proteins			TTTGGTTTCTTCAAGTCCTGTTCTTCCTGGCTATGCTTCTCATCAATCCCTCTGTTGCTCCCAATGCACCAGCTCCTCCTTCAAGTGGTGACCCGCATACAGAAACACTCCGGCCACCGCCACGCAAGGTCTCTGGTTCATGGCCATGAAGAATTTATTGATAAGCTTATATATATATAAAGTTTGGTTCTTCAATATATATGTAGTATCTCTTTTCTTCTAAACTTTTNCTGCTTGTGATCACCAGAAATAAGCTATAATAGTCCTACTCTAATGTTTTTGGCNNTATTTGATCTAATTTCTTATTGCGTGTAATATTTAATAATGCCTCCAGTT
GmaAffx.6572.1.S1_s_at	CA786022		0	No Homology to Known Proteins			CAAGGTTACCATTGCTTAAACACTGTTTAGCTGCAGCATATATGTTCTGCTTCTTCTTTTGTTGGTTGTAGTTGAGTTCACCAGTACACTGTAATTTCATTTCCATTTTGTCTGGATTTCAATCTTTTATTTGTAATGAGGAAATATGAGTTCTTATTTTTATANNANNNNNTTTAATGCGTATGAGGTGTTTGTTGAAATGGGTGAAAAGGGGTTTTAAATTACNTGAAATTGAAAATATGCTACTCTTAACTACTTGCTGAACTTGTCAGCATGCA
GmaAffx.65750.1.S1_at	CA935827		0	No Homology to Known Proteins			ATTTCTCTGAATGCTTTCCACTTTGGAAGGNAAAAAACAGTAACTGAAAANTCANGATTTGTCATTTGCTTGAATTCTCTGGGGCCAGANGTTGTTGNGCAGCTGTTTTATTTCATCACTTGTTCTAATTGCTTCTTNTTAGGAGCATGGTTTCTTTCTTCTNTGAGAAAGGNCAATTGTTTTGAGAAAGGAAACTGTTCATTCAAACTCTGGGTTGTGATGGG
GmaAffx.68286.1.S1_at	BG839255		0	No Homology to Known Proteins			GACACAACACAAAACCTCCTTAGACTTGGTGTATTTTGTTTTTCTGTCTGTGTTGTTCCTTCACAACCACAGAGCCAAAAACAAAAACATCTAAAACCTCTTTCTTTCTCTGTGTTTGTGTTTTTAGTTTTTGTTTTTGTCCTATGAAACTCCCAACAACGTTTGCAGACCCGGAATCCTTGTCTTACCTTTACACCTTGCTCCAATCTTCCTTCGACCAAATGAATGATCCCACCAACAACAACACTTCCACCACTGGGAGAAAACGCCGCAGAAAAAACGAGGATGATGATGATGATGATGATGATGGTGATGATGATGGTTCATCCAACAACAACAACAACAACAACAACAANNNGAGGAGCAAGAAGAAGAAGGAAGAGCTAAAGGGTATCCTCA…
GmaAffx.68319.1.S1_at	BG882875		0	No Homology to Known Proteins			TTTAAGCCGTGTTCTCGCCCTATATAAACCACCTTCTCTATCACACGCTTAACGGAACAAGCTAGAGATATTTTTTCACAACCACCTCTTTCAATTCTCTCCTCTCTTATTCCAAATTCAAATTAGAGGAAAAAGGGTCAAATAATAATTAAGTGTAATATGGATACGATCAGTGTTCAGGCGATGAGAAGCTTATCAGATAGTGACTCATTATCATCTGCAACATA
GmaAffx.68687.1.S1_at	BI315574		0	No Homology to Known Proteins			ATATCTTGCAAATCACGCTCTCATTAGTCTCGTCTTTACTAAATGTCCATTATATGAATAAACCACACAAGATTTGCACGCCACGCATGTGTNNGTNNNNNNNNNNNNNNNNNNNNNNNNNNNNNNNNNNNNNNNNNNNNNNNNNNNNNNNACACATACAAACACCTGCTTCACAAACCAGAATGTATTTGAAAAAGAAAAGGCAATTGAAGGAACCAACATTCAAGATTCTGGAACAGAGGCAGCT
GmaAffx.69858.1.A1_at	BU547559		0	No Homology to Known Proteins			TTATGGTTTTGATCGCTACCAAGGAGATCAGAGCAGAGCTGTGTCTGAAGATTCTGATGTCCACAAGGATGATCTAAATAGAAGAATGAAACAAAAGTATCGCCATACACCCAAGGGTTCTGAGCATCCTGAAAGTGATATGGATAAACAGAACAGAAAAAAGCAGTGTTATTCATTGAAGGATTCTAGTGCTGCTGATGGATATCATAGAAGTGAAAAAAGTAGATATTATGAGCATTCTTATTCATCTGATTATTCTGATCATCGTGAGAAACATCATAAGTCAAGAAGGAGCAGCTACAAGTATTGAATAGTTCATTGCAACTGTCAAGCATCACAGAAATTATTATAGAAGGCGGAGTAGATCTTCGTAAGGGATGCCAAAATAGAAAACACCAA…
GmaAffx.55934.1.S1_at	BQ612922		0	No Homology to Known Proteins			GTTAAAATTTCACCATTCAAAGCCTTGATGATTCTTTCTTGATTAGATATTTGGAATGTGGCTGAATCAGATTTTGGCTAGCTGTATATCCGTTTTTTTTGTATGTAGTGGTAAATTGGTATGGAACAATATGACAATATCCGGTTTCCTTTT
GmaAffx.56846.1.S1_at	BG508287		0	No Homology to Known Proteins			TGCTTGACATTATTACTGCTATTGTTTCCTGCTTTTATTGTTTTTTTTAGCTGTTTTCGCTTTGTGATGTCCAGATTGCCGCAGTATTTTGATNTTGATTAACTAATTAGGTTTTTGAGTGCTGTGTTAAAATGTGACTGGATAGGATTGGAGATGGAAATGTGATTTCGAGTAATAGAATTNANANTGGTCTCACTAAGCACATTTATGCTGATAAAAGAAAAACTAAGTACTTTTATGGGTTAGGCAAATAG
GmaAffx.5704.1.S1_at	BQ610264		0	No Homology to Known Proteins			GATTTTGGTTGTGGAGCCTCTTCTTTTCTTTTTCTTTTTTACCTTGGATGTAGGTATATTAAAGTGGAGTTTTTTTTAACTCTTTTTTCGTTTGCTTTGCTTGTGAGTTGTGACGAACTTTGTTACTGGGTAGAAACAACAAAACCATCACTCCCGTTATCTTAGTTAATCCAATGGCTTTCTTATGTTTTTTATGTTTGCAAAGCATTCTCTTTTGAGATTTA
GmaAffx.58529.1.A1_at	BE821142		0	No Homology to Known Proteins			CCACTGATGAATGATTACGATCACGATTAATTCGGCCCCGACAGTATTATCTTCAATTGAAATTACGTGTGACTTAGAAGAAGAAAAAAAGATGATGATGATTTTGTTTGTAATTTATTTTATTTGTTTTGGGTTTTTTTTTTAATTTTGTAGATTTTTCTTTTTATGATGGGTAAGTAGGGATTTTAATTTGTAATTGTTATTGGCCGTATATTGGTAGATGCTGGAAATTGAAGATTCTGCT
GmaAffx.57489.1.S1_at	AW395358		0	No Homology to Known Proteins			TTCCTTATCAATGCCTCTAGGAATTTATGTATGGTTGCGTTATGTTGGAATGCGAAGCGAGCGTGTGGGTATGAGCATGATGGCATTCCTTTTCTAGTCAAAAAA
GmaAffx.5944.1.S1_at	BU546557		0	No Homology to Known Proteins			AACAATAATGTTCCTCCGAGTTTAGGTCNTCCGAATGGGCAACATCTGAACCNTGAAGCTTATTCTTCTNCCTTGGGNNCATTCTCCTCATGCCAGACCTCCTTTCTAATTATTGAACGTGCTACATGGCAACAATTAATATATTATTATAGAAGGATCATATCATAATATTATGATATGAGTAAGTTAATTAATTAGCTCGAGACTTGATTTATATAATAATAATAATAATGATATGATATGCTATTAATCANANNNNATTTGTATATTTAATTTACTGCAACCGCTTCCGATCTGGTCTCACCTTAATAAGCAACCTGCACAGTGGCCATGGGCGTTGCTTCTTTCTGTAATTTCTTGAGTGACTTTTTAGTTTTCTATCACTCTAGCCATGTCTGC…
GmaAffx.52155.1.S1_at	CA935218		0	No Homology to Known Proteins			GATTGAGTCACTGTAAAATTTGTTTGTTCCTGATTATTGCCTCCAAAATTCTTAGCTTTTGGTCATTATTAAAGAGAATGGTAGGTTGGACTTCTCTTTCCTTTGTGTTTTCTCTAATTTATATTTATTTATACCTGACAGAGTGCTATCTT
GmaAffx.52033.1.S1_s_at	BI945149		0	No Homology to Known Proteins			AAGAATATTGCTTAGTGCTCCTGTTAGTTGTGGCATTTTCTTTTGTTCCTATAGTTCTATATGAATAGTTGGCCCATAGGCCGTGATGTTTGTCAATTGA
GmaAffx.52108.1.S1_at	BQ474028		0	No Homology to Known Proteins			GGACGAACTCTGAAAGACCAAGGACAATTTATAATTTTTTTTATAGTAGTTTTGCACTTTTGCTTCTCTTACAAATAAAAGAATCTTATTTTCCATTTAAAAATAAAAGTGTTGTCAATGTCATTTAATTGGTTCAAAATTATCATTTTTGAATCAATTGACGAGGTTTGTGAAACAAAAAGACTATACAACACTCAATCAAATGCGATTTATTTATTCTGAGACCATGCAATCCAATGTAACCAGTAAATTAGTAATCCATGTGTGAAGATGTATGA
GmaAffx.54278.1.S1_at	BG154611		0	No Homology to Known Proteins			TTCCCCTTGGCGTAGTGTAGTTTGATAATAAAAAATTGTGGCTGTAAAGTCCTTCGATCCTAGTTAAATTAGTAGATGCGTTTAGGTCACCAAAAA
GmaAffx.53416.1.S1_at	BE023752		0	No Homology to Known Proteins			GAACTTCGATCTTAAAGTCTTTTGTATTATTTAATCATGTTTAGGCTTGTTGTGGGTTCATGGAGTTTAGGTTGGTACTTTTGCATGCTTATGATGAGACACACACCATTATTTAACGTATT
GmaAffx.53683.1.S1_at	BM523484		0	No Homology to Known Proteins			GACTATGGTGCTGGGTATCTTGTTCAGCCAGTTGGACAGTCTGATGCTCTCAATGCTGGAGGAGCTGATGTGGATGGTGGAAATGATGACGATGGTGAAGAGGAGGATGAAGTTGATGACGACGACGATGATCAGGTGTTGCCTCCTCCTGACTCTTCCCACAAGAGGAAGAGGGATGATGAANAGGACGTGGACGACGATGACGATGTGGTAGCATTCACGAAGTCACCCAAGAAGCATCATTGACTTCTATTATATATATCAATGTTCTTGTTCTGTTTCAGGCTTCCATGTGTTGGAAGCAGGGAAACCTCAGTTTTAGATAGAAGAACGATTGATTAGTTTTTAGGAATTTAGCTCTCTCATGAACAG
GmaAffx.53750.1.A1_at	BE659777		0	No Homology to Known Proteins			CAATATGCCCCTTGCATTGCCAATTTTGTTGTACCAAATCACACTGAAATGAGTCTGACTTTGAGCCCAATTTTTTTAAACTCGGGCCCAGGCCTTATTTTTGTTTGTTTGTTAGTGCTAACCTTCTTGGTCCTTTAAATGCTCAATGTATGT
GmaAffx.93529.1.S1_s_at	CF809254		0	No Homology to Known Proteins			GTTAGCTATATATATGTGCCTGCAGAATGCAATCACAAATCACAAGTCAATACCAATTTCCTCCTCCTTTTCTTTTTTCAATGCACTTAATAAGCCAATTTTTTTTAATTTCAAGCAGTAAATAATAGCTTCACTTAAACACAACATCAAGCAAGATAAGTAAACCAGAAT
GmaAffx.9475.1.A1_s_at	BI967281		0	No Homology to Known Proteins			CCTCCATTTCTTTTTTGGGCCATGAGTGGAGGTATGTAGGGTCTTCTTAGATTTGTTGATAGTTCAATTTATAGGTGAGTGCNCTTGTAGTTGGTATATGTATGCTCACCTGGTTGGCTTGTCTGTT
GmaAffx.9539.1.S1_at	BI972166		0	No Homology to Known Proteins			TAATATTGCCCTCTCATGTTTTATTGGTATTCTTTTTTATGCTGNNNANNNNNNNNAANTTCCACGGTCAATTAGTAGTTCATAATAATCAATGTTTT
GmaAffx.93452.1.S1_s_at	CF809177		0	No Homology to Known Proteins			TCAGCTTGGCTGATAGAATCTCCATAACTTGCTTTTTCAATTTAGCAGGAAGCATCTGTATGTTTCTGTGTCTATAATTGTGTGAAACTTGATAATTAATTGTTTTAGATTTTATGAACTTGTGACTTAGGCTGAGGTCTTCTCTGTTTCGCCCCTTCTAGGCGCCAAGACGCCAACTGTAAAATTCTGCTCCAACTATTGATTTAAGTCTCAAAGTCTTTGTAGATGACCATACTAA
GmaAffx.992.1.S1_at	AW310932		0	No Homology to Known Proteins			TACACCCTTCTAGAGTGTGTCTTGGGGCTATGCTTCAAAGTGATAACCATCCTCCTTCAGCTTCCTTATGAGTACATAGACAACAATCCAATTCCCACCATAGTCTTCAAGGGTCGCCCAAGAACCTTCCATGCCTTCATAACATGCATAATCTTCGCCTTCTCCGGTGCTACCAATGCACTTGTGGCATTCAATAAGTCAAGATTTTCTAGGCTTTGTGGGTATTATGCAATGGCTTCTATGGCTTCTGCTTTGGCAATTCTCTTGTGGGCAGTGTGCTGCACAGGCATCAATTAGAATGGCTGGACTTTGATTCTGAAACTGCTATCGCTTTATAA
GmaAffx.92227.1.S1_at	CF807952		0	No Homology to Known Proteins			GTCCACAAATATAATTCTTTTTCCACTATGCCCAAGTCAATCAACAGATAGAAAATAAACAGAAGACTAAATTAAGACGAAAAACTCAAACTTAAAATCCAACTATATTTTTCAGTATTTCCCACCTTGCTTCTACCCCTGTTGAAAGTAACAAAGTAAAGCTGCTCTGCAACAAAGTAGATCTAAATTTACAAGACAGGAAACGACCAACAAAGTAAAATAAAAGAAAGAAAAAAGAAAAAAGGCAAAGAGATAAACCCGAACAAAAACCAAAAGATATAAGCATCTTAGGCAGAAACCCT
GmaAffx.92374.1.S1_s_at	CF808099		0	No Homology to Known Proteins			ATTTGTAAGCAAGTTCATCAACTAGTATCATCCTTCTGAAATAGTTCTGTCGTGAAAGATGTAATCTCCTCTGAACTGGCAAGTTAATTGCTTATTTCTGCTTTTGTAGTCATCTGAGATTGTTTATTTTTAAAAAAATTCTTCTTCCCCCCTCCCCCCTTTTTTTATTGGAGGGGCGATGATTACCGAAGGTTGGCACAGTTGAAA
GmaAffx.92426.1.S1_at	CF808151		0	No Homology to Known Proteins			GAACAGTTGCAGAGTTTTTAACATTAATACATCCAACGTTCTCAACCAGAAAGTAAAAAATGTACATCCTCTTGCCCTTTTCCCCTTATTAAATAACACAACTTAAAACTTGGGGGGCAGTTTGGCCACAGACATTGACCGTAGTTCATCTCACAGTCGGCAACATTAAAATGGAAGGAAGGAATAACCTGATACATTTTCATATCCAAAAAATGGAAAATTTTGTTGTTTGGCATTGCCAAGAGTTCCTAAATT
GmaAffx.92112.1.S1_s_at	CF807837		0	No Homology to Known Proteins			TAGCAGTCCAAATGCCGACACGACATGCAGCAGTGGTTTATGCTTGGAAATGGGTCTTAATTACGAGCATAAGGTTGAGTTTCAATGTAGTTTTCTTAAATACGAATAAGTTGGAAAAATAAATATAAAGTGGTGTCCCGTGTCCATTTGGAGCAAGGTATCATAAATGCTTAGCAAAGTGCATAAACGCTCCTACAAATCATTTCAGAAATAAAGCAGTATGGATATTGGATGATATATAAAGTACTATGTAATATGCAGTGAAGGTATAACAAATGTCAAATAGCAATTATTCTTGCGTACTTTTAAATACACTATATGGATGGATGTTTGGAAT
GmaAffx.9152.1.S1_at	BE823822		0	No Homology to Known Proteins			CAGTCGGATCCATCCGCGCTGGGTTAGGCTTCACTCCGCCGCCGAGACGCGGTTTCCGGCGACGGTGGAGAGGCAGGATTCCGATCACGATCATGATCACGAGCACCACCACCAACACCACGGCGAGCGCCACCACCACCACCACCGCCACAAGGAGAGCTGGTTCGCGAAGAAGATTCGGAAGTTCATGAAGCTGTTCTGATTTTGATGTTGCAACGACGAACGACGATGATGCATATATATATATAGTAGTTATATAGATATGAAGGGTGAGTGTTTGTGTAAATAAGTTTGCATCTGATATAGAGATGTATGATGTATGTGTAAGTTTTGATTATTTTATGTTGTTTATGAGTTGTTAGGGATGTTTTATACTGTAGAATAATATGGTGTTGATCA…
GmaAffx.91550.1.S1_at	CF807275		0	No Homology to Known Proteins			TTTGTTCTCTGCACTGAATAATACTGTACTGAATTTCTGAAACACGTGGTTAACCGGATATTGCCCAAAGATT
GmaAffx.91479.1.S1_s_at	CF807204		0	No Homology to Known Proteins			TCACCCCTCGGATTTGCAGACAGAGAGAGAGCTATCCTTACTTAGATGTTACAAACTTACACACA
GmaAffx.92671.1.S1_at	CF808396		0	No Homology to Known Proteins			TTGCTAGTGTGGTCAAAATTTTACGTGTTGAATGCTGGTATACGAGTGTTTGTGCATATGGTTAATTTTAGATGGGAAAAGTACCATATCCTTTTTATTCACTTAATTTTGGGTTCTACATTCTATTTCAGCGTTGCTAGCTCAGGGAAGGAAAATCACAAATTCCTCGTACAATCTAACGTGAATTTTCACGTCCCATTGAAGTCATCAACTCTATCTTTTGCATCTTGTAGGCATCATACATGAATTGGATATGTCTGTAGACTTAAGTTTGGATCAT
GmaAffx.92693.1.S1_at	CF808418		0	No Homology to Known Proteins			AATAAGTTACATACATAGGAGAGCACACATAGCTACCCTTTTTCTT
GmaAffx.92551.1.S1_at	CF808276		0	No Homology to Known Proteins			AAATGTAGAAATCCGGATACCGCCATTCAAGCATGAAAATATCTCAATTATACAATATTCTAAAGGAGATTTTTTTTTGGTGGTAAAATAATAAGTGCTAAAAGTCTAGCCAACACGGGAGAGACACATGAACGTCTCTACTTAAAAAACTACCAATTAATGGTAAGGATAGAGAAAATTTCACTCGAGAATTTTCATGCACATATTCTAGGGTAGCGTCTTGATTGCAACAACATTATGTGCTTGGAGCAGCCTCTTTTTTCTCGGTCGACCCCTCGCCTGCATCTTGTTCAACAGGCTTTGACACTTCTTGCTCTTCATCGTCACTCTCA
GmaAffx.92561.1.S1_s_at	CF808286		0	No Homology to Known Proteins			CTTGAGCTTTTTGGAGGGCTTGTTTCTTTTGTTGAGGAATTGGATTGATTTGTTTCATTGATGTATTGCTTGGTTTGTTATGAAAATTTATCTTAAGGGGGGTCTATTATTCTCCTAACTCAGTGTAATGTATTCAT
GmaAffx.92778.1.S1_s_at	CF808503		0	No Homology to Known Proteins			TTATTTGGACATGACGATAAGCGTCACCAATTAAATAATCCTGAAGA
GmaAffx.92864.1.A1_s_at	CF808589		0	No Homology to Known Proteins			CTCTGCCAGACTGCCCCCGTCTCCCTTTTAATATTCCCAACAGCAAACTTGCCTTTTCCCTTTCT
GmaAffx.91276.1.S1_at	CF807001		0	No Homology to Known Proteins			AAACTTGCTTCTCACGATTCAAAGATCTACTTAGTTAGGTTTTGTGAACATTCAGGGTAGTTAATTCCCCCCCTTTCTATGAAAGAATTTGTATTCATGGTATTATGGATGCCAGTATGCATTATGCAGTTACAGAAAATCTTAATGTCCACTCGTTTTATTATACATGAAGAATTGGTGATTGATAGTGAATCTCATTGTCGGTACACATGTTATTGATTGGA
GmaAffx.90222.1.S1_at	CF805947		0	No Homology to Known Proteins			GTTTCTAGGAAAATAGCAATCTGTTATTGAGCCAACCAGTTAGATTTGCTCTTAGTTGGTTGTTGCTGCAT
GmaAffx.90242.1.S1_s_at	CF805967		0	No Homology to Known Proteins			TATCTTGTTTGCACGTGAATAATCTTCGGTGGCTTATCTAAAGAATTCAATATGTTTGTCACCTTAGGAAGTATTATTTGTGATGTAATTTTTGTACTTTTAAACGCTACGGGGTATGTTGTGTAGCCAGTATATGTACCCATCCTATCGTTGAAA
GmaAffx.86927.1.S1_at	CA937162		0	No Homology to Known Proteins			CCAAAGTGAACGAGTATGTCCTAAAAGTATCATCTCTACTGCTGCTTCAACTAAAAATTATCAAAGAAAAATATTAATATCCCACATAATTAATACGTACGTAGTTCTGAACATCAGAATAATCCTTTTGGAGCAAGTTTGTAGGCCGTCTTAAATATATGTTCAAGTTCAACCTTGTAAGTTCTTATCACATATTAGACCTCATCGCCAAAATAGAAACAGTCAGATCGAATGGCTAGATTTATAGACGTTTACTACTTCAATTACCACT
GmaAffx.8999.2.A1_s_at	BI700574		0	No Homology to Known Proteins			ATAATTAGATTGCAATTGTTTGTTCGTTTTATT
GmaAffx.89473.2.A1_at	CK605927		0	No Homology to Known Proteins			AACAAATCTATTCCCCCACTACTAGGAGAGAGGGAATAATTTATTTGACTTGTCAGCTTGATAAAGCGGACTTTGAAAATAACAATGCATGCAGACAACTGCAAACACATGTAGAACACAGTGCCTTACAACTGTCTGATAAAACAAAAGCACAATAACTATTTTAACTAGACAGAGTCCTCTAAACAATAACANTANTCNAACATNTATACTTCTTTGTGGATTTGCAAACNGCAACTGCACCTNCCCCCTNCANGGCTTTCATTTNCACACTTTCTGTATACATCCATGTGGGGGTGTGATATGAAAGGGCTATATTCTAGTAGTGGTAGGGTGG
GmaAffx.84778.1.S1_at	AW567674		0	No Homology to Known Proteins			AGGGACTTCCAAAATATTCATCTTCAGGAGGAAGACACAAACACATTCAGAATCCTGTAAAAGAGGGGAACCGTTTGAGGGAAATCAATAATGACCTGATGATGAATAACTGCCGAAGCTTACATGTAATGGTTTCTTTTCTACTTGGTATTCTTAGTGCCTGTCAAAGATGCTTATGCTCATTATTGCAGTTTTTAAACTAGTTTGCTTCATCTNNNNNNNGTCAATGAGAGGGCCTCTGACAGCGGCCTATTTTTTTAGAGTGCTTCTAGTCTTGCACCGAACATTTATGTACCATTAACAGTTTTCCTTCAGAGATTATGAAATTATGCTCGTCGCCACAC
GmaAffx.84490.1.S1_at	AW101087		0	No Homology to Known Proteins			TTGGATTCCCTGTGTCTAGCTTCTCTTGTGTGGGAAATATTCAAGTACTTCTAGTAGTTTACAGAATTTTTGTAATGTAATTTTTTTAATACACTGCAAAAATTGGTTTCCCTAATATAAAAAAATATATTAGAGAAACTAGTTTTGTAATATATGA
GmaAffx.85497.1.S1_at	BG508375		0	No Homology to Known Proteins			AATTATGATCCTAAGATTTTTACAAATAACGGGAAATCTGTTTGGCCATGCGACGATAACTTTTATCCTTGCTGTTAGGGACCTGCTTTGTCAAATCAAATTTGTTTTCAATTTGATAATCATCAATCAATCCCTTT
GmaAffx.82552.1.S1_at	BE800329		0	No Homology to Known Proteins			ATTCTCTTTTTCCTTCCATATTTCATCCTTGTGCCTCTACTTTCTTGTTTTTAAATTATGTACCTCAATGTTTCTTTATGTTGATTTGTTTATTGTTGGTTGTGTTCAGTGACTGAAGTTTCATTTTAGAATTCTTTTACTGGTGCATGCTACTATTTAATTCTGTTGATACCAGATTATGCTAGATTGGATGACCCTGCTGGAGTGCAGATAGTGATNATCCTCCTGTTCAGTCATTATTGGCCTAGCATATCATCACCTATTTTTCATTGATTGTAGGAAATGTGAAATTTGAGATATTCAGTCATTTCAGTGTAATATTCTGGGTTATGCCTACTGCCTAAGGGTTGCTTGTGATCAAATGTCGATTCTATAGATATNTTCANTTTATTNTGCGTT…
GmaAffx.84075.1.A1_at	CD400437		0	No Homology to Known Proteins			CTGGTGACTCTAATTATACTAATCAACTTTGGCATAGCCATTATTGAAGTTTTCCATTTTTATTTTATACCAGCCTCATTTCTAAATATTTTTCTGTCGTCGAAGTTAACCCGTGCGATTGTTGTTGCCCTGATTGCATATAGTCCATTCATGTTAGTCAAGTACC
GmaAffx.84342.1.S1_x_at	AF047053.1		0	No Homology to Known Proteins			AATTGTGTTTATTTTGTACTTCAAGTTATGAA
GmaAffx.86415.1.S1_at	BG551444		0	No Homology to Known Proteins			TAGAGTTCTTCTAAACTCAAAGAAGTATTTTTCTTTTTTTAATTTGATTGTACTTTTATTATACTCCATTTGTAAATATGTTAATATATATGTGCTCTTGCGATAAATTGAGGAGGAGCATGGCTTTGTTTGTTACTTAATGTTGTGTTAGCTACTTCCCTTTCCAAATGCC
GmaAffx.88420.1.S1_at	CA850620		0	No Homology to Known Proteins			AAAATTGCTGGCAGAATCGAACCATAAAATCTTAGCCATCACTGAGTGATCTCTTTTCCCCAGTTATCTTTTGCCTCTNTCTGATTTTTCGATCCCTAAATTTCACTTTATTTTTTTTCTTAGTCTAATTATATTTGTGAATGTGTTTTTAGTTGTGTTCTATTTGAATGTGTTGAGGTCAGTGATGAATTCAATTTGCCTACATTGGCTGAGTATCTGGTTTTTATTAGATTATGATGTGTCCCAACAGTCTGAGGCCTCTGAGTCTGTGTATTCCAT
GmaAffx.87414.2.S1_at	BG653279		0	No Homology to Known Proteins			ATTAACCTATATACTGGTCTATATCATCATCACCTTGCACCTCTCTCTCTCTCTCTCNNNNNNNNNNNNNATATATATATATATATGTGGGTTTAATCTCTTACTTTCTTTATCTTTTCACTTTTTTCAGTTTTGGTTTGATTTAATTACTTGATTAAAACTTACATATATGGATTTGAATATATAGTACGTGGTTTTCGANNNNNNNNNNTCTAGATATTATAATAATATGATGGTGAAAAACAAAACTAGTACTCTCTTTTTCTTTTTTGTCGTTTTGTTGTTGAGCAGTGAGAGCACTGTCACTTTGTGCCTTCTTTTACTTGTAAATTCGAGATGGAGCTTG
GmaAffx.87653.1.S1_at	BU763409		0	No Homology to Known Proteins			TATCATGCTAGATCCATTTTTATTGTAGAAAAATGCAGCATTATGTCAGACCTTGATAGAATTGATTATCCTTAATTTATGCAAATTGCTATACCTAAACCCAATAAAGAGTCCATTCAATGTTAGACGTGTCAACTACCAACTGTTGAACTCTATATCAGTTTCATCAAACTAGTGCAACGCCATTTTCTTCTTCCACTTGGTGGGAATATATGAATTTTTCTCAAGCAGTTAAT
GmaAffx.5378.1.S1_at	BI969133	At5g61030	2e-05	Post-Transcription			ATGATAGACCTTCTGGACCTCAATCTGGCGGCGGCGGCGGTGGTGGTTATCGCAGTGGGGGTTTTGGCGGCGGGTGGTGATTTTGCTTCTCGCAATGGTGGTTGGTGATTCAATTTTTGTGTCTTCTGCTTAGTTTTGAGATTATTTTTTTTATGTTTATGCTTTGCACTTTGGTAAAGTAGTAATTAGTGAATTTTTATGCTTTTCCTCCTTACATTTCTTGGTGATGTTATTCTGTGATGTTAATGGAGCATTTGTTTCCATCTATTATGGTCAANNNGAGTGTTAGGTTGGATTTCAANNNANNNNNNNNNNNNNNANNTCNANNNTNNTTNNNTNNNTNNNNNNACTTGAGAAAATAGCCCCGGCACTACCACCTTTTATTGTGACAGTGAGTGT…
GmaAffx.64316.1.S1_at	CA935158	At5g51120	2e-40	Post-Transcription			TCTGCCAAGCGTACAAATGTTCCTGGAATGAAGCAATATTTTGGAAGAAGACCTGCTGGTTTCCGATCTAGGAGGCCTTTCATGTCTGCTCCATTCTTTCCACCATATGGTTATGGNNNNGTTCCAAGGTATAGAAGACCCACTCGATACAGGCCATACTAGTGCACATTCTCAGTTTAATAGGTGATCACATATTAATTATGATGAGACAGGGCGTTGTTAATTTGCCATTGTAATAATTTTCGTTGGTGGAGCAAGAACATAAGCTTTCGTTTACACAGAAGTTAGATGTCCTTGCCTGTTAACGCTGTAGAATGTATGATGCGAACAAATGTAGTTTTGATCACTTGGCTACCCATCTTGAANGNNGNNNGNNCTCGGCACTCCGGTTTTTACTTA…
GmaAffx.72873.1.S1_at	BI972251	At5g51410	3e-16	Post-Transcription			GGGTGAATTTACTCTTTTCCCATCTCANANCTTTGTTGAGACTATACAATCTCCCTTTCGTCAATATTATTAATGGAGAAAAGGGTTGAGGTAGGTATTTCACTGTTGTAATTTTTCTTACGATTTGTTTTGCACCTTGATACAAGTGATTTATGACGATTCATCTCTGAAGCCTTGTGTGTAGTCTTTCTTTTCTCCCATTTCTGGAAATCAATTGATTGATTTAAGATGTCCGGCACAAAATTACATGAATGATTGTCATTGCTGCTGAGGGGGATGGTTTTCTCTTGTATTGAGGTAACATGTGAATCTTATACCCTAGACAAATAGATTGATATTTGTTTGTTCGGCATACAAATGTTTGTTTTGTTTCCCCTTTTCTTTTTTGTTTCATTGCCT…
GmaAffx.34241.1.S1_at	BU089662	At1g17370	1e-20	Post-Transcription			TTTCCTTTGAATCCCCATTTCTTGTTCCTCTGCAACTCTAACCCTAGAATTGAAGATGCAACCACAGAGGTTAAGNCAGCATGCCATGTTGCAACNNTCTTTCTACCACCACCCCGCTCTCCTTACTCCTCCTCAGATAGAGCCTATCTTGAGTGGAAATCTGCCACCTGGCTTTGATTCGAGTTCATGCCGCAGTGTTTATGTTGGCAA
GmaAffx.22309.1.S1_at	BU550470	At3g58970	1e-53	Post-Transcription			TATTCAGCTGCAGTTGACGTTGACTATTGCATCATTTGCTATTGCTATTGAAACTATGATTGCTGGTGCATTTGGTATGAACATTCCTTGTAACTTGTATCACATTGATGGAGTATTTTGGCCCTTCGTTTGGATCACGTCTGCAGCTTGCGTATTGCTTTTCTTGCTTATTTTAGCATATGCAAGATGGAAGAAGTTGCTGGGATCATAAGGCAAGGCTGTTGTGACAATTGGCAATTTGAATCTCCGCCGCGAGTGATCTGAAGAACAGACACAAACGTGTCACCGGNGAATAATNNNNNNNNTNNANNNNNNNNNNNTNNNANCANTGCTTTTAGCATCATGTGTTTTATAGCCGATATTATTCACACCATCATTTTTAATTTACCAACTTTATGG…
GmaAffx.42274.1.S1_at	BQ628945	At5g51660	2e-39	Post-Transcription			AACTTGTTGATGCTGTACCCCATGTTGCTGGCCTGAACCCCAGAGCTTTCAGATTATTTCGGTCAAATGGAAAGGCCCATCGGCCAGGCCCTGACAGTATAGTTGATTGCGAGCTGCTATGCCATTATGAAATGCTTCCATTGGAGGAACAGCTTGAAATTGCTAACCAGATTGGAACAACTCGATCACAAATTCTGTCAAATCTAAGCGATCTGTCTCTTGGAACAAGCTTCTTGTGAACAGTCATCTTTTGTAGATCAGGGAACAGTGCTGCCCATGTTTCCCAAGCTCTTGGCAGTTATTTATTTTGATGCAATGGCATCTTATTATCACAATTAAATGCTCCACTATGTTGAAGGCTTGGGTAACTGATGAGATCGTAGCCTAACTCTCTTACGG…
GmaAffx.15746.1.S1_at	BG508085	At4g25630	1e-32	Post-Transcription			TGAAACCTTGGTTATCAAAATACTTTGTACCTTTTATAGTAAAGTAGTCAAGTTATTTGCCCCCAATATTTACCGTGTTTGCTGTAAAAAATTCACATATAATCTGCCCAAAATTACTTCCTTAGCAGAACGAGATGAGATCAACAGCAATGNTTGTACGTTCTACATGTGAATCTAGTT
Gma.8035.1.S1_at	CA802740	At5g42820	1e-06	Post-Transcription			GAGAATTCACATTCTGGTCGTGGTTCTGGTAGAAGAGATTTTGACAGGTCCCATGGCCCCCATGGTAGGAGGCCTAGAAGCCGTAGTCCTCGGTATAGAGGAAAACGAAGTAGAAGTCCAGTGGGCAGAGATAGGAGTCCTCCGATCAGAGAAAGTAGTGCAGAAAGGAGAGCTAAAATAGAGCAATGGAACAGGGAGAAGGAACAAGGGGACACTGGTAACATGAACAATTCGAAAAGCAGTGATGATTATCAAGAACAGAGTGTTGCACAAAATGGTAGTGAATCTGGTAACCATCAGATATAGCAACAACAACGTAATGATTTGGCCCAAAATCTGCTAGTAAGTGTGGCAAGTAATCTGATTTGTGTTGTTTGCACCTGCATTTAGATGGATTCA…
Gma.7140.1.S1_at	BE657222	At5g04430	1e-104	Post-Transcription			GGGTGTTCCATACACATATGTGCTTCNGTCTGTTGCACCACCGGCATACAATGCAGTGAATTACAGACCAAATGGTGCTGCTGGAGGAAAGCTCCAGAACAGCAAGGAGGAGCGGAGTAACTCATTGACCATGGGTGTTGCAGATGAGCATATAGGATTGGTTGTTGGTCGTGGTGGAAGGAATATTATGGAAATTAGTCAGGCTAGTGGGGCAAGGATAAAGATATCAGATAGAGGTGATTACGTATCTGGAACAACCGATAGGAAAGTTACCATAACAGGATCCCAGAGAGCAATACGTACAGCTGAATCTATGATATTGCAGAAGGTTGCTTATGCTACCGAGAGGGGGGTGATGGAGTAGTTTGCTACTGCACTTGTCTGCTGTTAGATGCTTAA…
Gma.6121.1.S1_at	CD392616	At1g31970	2e-15	Post-Transcription			GCTGGCGACTTGTTTATTTTTGGCTGAAGAAATTATATGAATTCGGTCATTTCTTACTCTTTTTGGTCGAGTTATTTATTACTTTAAAAGGTAATAATAAAGGTTAGTTATAATATATAAATAGATTAGTGAGTCATTTCATGTTGTAGTGCACTCATCTGTGCTTTCTTTTGTTATTCTTTCTTTACCTTATGGAGATGATCATTTTGTATTCACACATTTTTAGCTGTCTAGAATTGTCTTACNATTTCCAGAGTTTGACGTTTTAGAT
Gma.6413.1.S1_at	CD416470	At2g27040	6e-96	Post-Transcription			ATATGCTATGCGCACTTGGCTGCTACTCAGTTGGGGCAGTTCATGAAATTTGAGGACAAATCTGNAANCATCTTCAAGCCATGGTGGATTGAGCGGTGCAGGTGCTGTTCCCGTCCCTCAGTTGCCTCCCTTGCAGGAGAATGTCCGCAACACAATGTTCTTTTGTTGAGGCCTTAATGCTCTGCCCTGTCTCCTCAAGTGGTGAAAATGCTGTACATAAAACTATGTTTCTAATCTTGCAAGTTATGCGGACGAAGTTTATATTGTGGTAGACTTGGTCTTCTTAGCCATATTTAGTCTTTCTAGCACAAGCCTTTTCAAATGTTCGGGGACCTTACCTTACTTTTTGTAGCAAGACTCTCTTTAGCGCAACGTCTTTTTGTAGCAAGGCTTGATCTT…
Gma.5747.1.S1_at	BG510757	At1g48410	0	Post-Transcription			GTAGCACGCGTGTACCTGGTGCCAATGCTGCTGTGAGACCATTGCCTGCACTCAAGGAGAACGTCAAGAGAGTTATGTTTTATTGTTAAGACATGAATGCCAAAGATTACTGTTAAAACCTTGTTTAGTGNAGTGCTTTTTTGCTTTCAAAGTTTCTCCAGCAGTGGTCATTAGGTATTGAGTTTTTTGAAACTATTTCAGGAGTGTGGTGTGTTGAATAAGGTGTGTTGTTTTGAAAGTATCTCCTGTGAGGAGTGCTTTTTATCTTTGCTGCTGTGAGGATATGAA
Gma.5847.1.S1_at	AW348529	At3g53110	6e-86	Post-Transcription			AACTTGCTAAGATTGATGTGGTAAAAGATTACNTATTTGAAATAGGAGAGAATGTGGGGCAAACAATTATATTTGTGCGCTCAAAAATTACTGCAAGATTAACACATGAAGCACTTGTTNAGTTGGGCTATGAGGTTACATCTATACAAGGTTCTCTTAGTAATGAAGAGAGAGACAAAGTTGTCAAGGAGTTCAAAGATGGTTTGACCCAAGTTCTTATATCAACAGATATTCTTGCTCGTGGCTTTGATCAGCAACAGGTTAATTTGGTCATCAATTATGATCTTCCCAAGAAATACGGTGTACGTGATGAGCCAGATTATGAAGTGTATTTGCACAGGGTTGGCAGAGCTGGGCGTTTTGGGCGCAAGGGGGCTGTATTTAACCTGATATGTGGTG…
Gma.5264.1.S1_at	BM093119	At5g04600	4e-73	Post-Transcription			AGACTGAGTGGGTAACCTGTCTCATCATCTTTAAAAGATGATTTTTCTGCATATCCTGAAAGGTACTAGAGAACTTAATCAAAGTGAGGTTGTTTTGTTACCTTTCTTCCCTTAGATGTGTTAGAGTAAAACTGCTACTGCTGTTTTAGGACTTAGTATTAGCATTTAACTATTGTCAAGCCTTTGCAATTTTGGGACTTAATTCTGAAACCTTGTGTTCTCAGAAATATTTTATAGAAGCATTATCCGTTTCTTAATATTTTTCCCAGGAGGGTAGATTGTTAAGA
Gma.4482.1.S1_at	BI967445	At2g41060	2e-07	Post-Transcription			TGCAGGGTGGTTACAGTGCTCAACCGAATATAAGTCCCGGTGTTGTTGGAGGATATGGGAATCAGGTGGGGTTGCAGGTGGCGTATCCGAATCAGAATCAGAATCAGCAGATAGGGCAGGGTGGCTCCGGAAGAGGGCAATATGGTGGTGGATNNNNNCNNNACNNGNNNNNNNAGATTCCACATAAGTGCATCAGTATTTTATTACTGGCCCGGTGATTCTTCTGAGTTCTGAAGTTTAAGGAGCTGATGCAATTGGCGTGTTTATAATGAAATGTTACTTACTACAATGATCAGAATATTTTAATTACCAAATGGAGTTCTGTTTTCGCGACCTACTTTTTCTTATTTTCTTCCATTTCAAAATATTGTAGTATTTTGATTTTTAGTTTATCTTCAA…
Gma.1856.1.S1_at	BQ628889	At4g14342	3e-44	Post-Transcription			AGCGAATCACACACACTCTGAACAACGCCCACCATGCAGGCCAGTGATAGGTTTAACATCAATTCCCAGCTTGAGCATCTCCAAGCCAAATATGTTGGAACTGGCCATGCCGATTTGAACAGATTTGAGTGGGCAGTGAACATTCAACGAGATAGCTATGCATCATATATTGGACACTACCCTTTACTGGGATTCTTTGCTATTGCTGAAAATGAATCTATTGGAAGAGAACGCTACAGCTTTATGCAGAAAATGCTCCTGCCTTGTGGTTTGCCTCCCGAAAGAGAAGAAGATTAAGGATTACATCTGGATTACAAATGGATCACACAACACTGTTAATATAGCCTCCGACAGTTTGTTGTACCGTGTTATCTTATCAAGGAAACAGATGGTTGTGTG…
Gma.18058.2.A1_at	AW832198	At4g25630	1e-26	Post-Transcription			ATGAACAAGTTAAAGGCTGATCAATTCAAACCNNNNNNGCAAGTCNCCCTTGAACCNTTTGAGAGGGACCATGCGTGCGTTGTTGGCGGATNCAGAATGCCCAAGAAGAAAAAAGATGCTGCTGAGTAGATTGCTTTCCAGGCGTGTNACAATGTTTTCATTTCATGAGATTTGTGTTAAATTTTGTTTTGAAACTTTAGTTATCNAACGTAGTTCTGTTTTGATAGTTTGATCGTTTGAATGCCCTAGAGGAAAAAAGATACTTNTGAGTATATTACTTTCCAATAGCCTGTAGGTGTTTACCAATATCATTTCATGA
Gma.2060.1.S1_at	CD397075	At2g24590	3e-36	Post-Transcription			TGTGGTGAACCTGGTCATTTTGCTCGTGAATGNCGCATGCGTGGTGGTTCAGGAAGACGCCGTAGCCGTAGTCCACCCAGATTCCGTAGGAGCCCAAGTTATGGGCGAAGNNNNNNNNNTCCTCGTGGGCGGTCCCCTAGGCGCCGTAGTTTGTCACCTCGTGGACGTAGCTACAGCAGGTCACCTCCTTATCGTGGGCGTGAGGAGGTCCCATATGCTAATGGAAATGGCCTTAGGGAACGACGCAGAAGCAGAAGTTGATTTTGAGACTTGGTATCTGTGATTGTTAAGAGAATAGTGAGATTTTGTTAATCTATAGTGGTGCTTAGACTGAAGTATGAGTCTATTTTGTTGGGCAAGGCCCTGAGTTTCTACTCTTGGATTGTATTCGTTAGTTTC…
Gma.2609.2.A1_at	AW311028	At5g11170	4e-09	Post-Transcription			GGAACAATGTTAAGTGCTTGGTGGCATGAGTAATCGTGACGCAGAACGGTGCAGCTGATGATTAACCGTGCTGATAGATACCAGAGTCTGTTTACAGACTAGGCCATTTTACCATTGGATATTTATCGGTATTAGATGTAGCAGCAGTGTAATGGCTTATGTATTTATGGGTTTTCACTTACTGTATTTTGTGTGGCACCTACGCTGTTTTCATGAACGGTCATGTTTTGAGTTGGTCT
Gma.2459.1.S1_at	CD409102	At4g30330	2e-40	Post-Transcription			GGAGACAACATAACCTTGATGATGAACACGGGGAAATGATTAACACTCTGGCACAGTTGTAAACTCCGTTCCTATCCAACAAGAAAGAAAAATTATCTTTCCCTTTCCAGTTTAATTACTGTTTCTCTTGTTAACATCTTGAATATGTTGTGGGAGAAATATTATCATGTATGAATCTGTGAATTTTTAATACTCTANGATAAATTCTTAGTTGAGCAGTTTAACANTGTTATATTGCCATCANGTTTGCCTCTATTATATTTGTGCCTGGAAGCTNGTGATTNTATGACTGAGGAAGTATAGCATCAATCTTAACCTCATTTAGTG
Gma.3610.1.S1_at	BM522772	At4g02840	3e-39	Post-Transcription			GCTCAAGAATGGCACTATTGTTCATGGCACCATTACAGGTGTTGATATCAGTATGAACACACATTTGAAAACAGTTAAACTAACTCTGAAAGGGAAAAATCCAGTNACTCTNGATCATCTCAGTGTGAGGGGTAACAACATCCGTTACTANATTCTTCCTGACAGCTTGAATCTNGAGACCNTGCTNGTGGAAGAGACACCNAAGATCAAACCCAAGAAGCCAACTGCTGGNAAACCTTTGGGACGTGGACGAGGAAGGGGCCGTGGNCGTGGNCGTGGNCGTGGTGGTNGNNGTTGATTTGCACCTTTCTTCATTTTTGTGGCATGTGGTTGTAAGCTATGCAGCAAGAATTTCTGGGTGGTTTTAGGAACTTCTACGGAGCATATTTTTTATTCCTG…
Gma.12187.1.A1_x_at	AW734314	At1g66260	8e-12	Post-Transcription			GAATTGCCCATAAGTGCTCGGGTAAATGTCACTGGGGTGAATGGACGTAGGAAGAGGACTGTTGTAATGACGTCTAGAGGTGGACAAGCTGGAGGTGGTNNTNNTNNNCNNNNNCGNNNNNNNNGTNGGGGACGTCGAGGTGGCCCAAGGAGTGGCAGTGGACGTGGTGGAGCTGGAGGTCGAGGTCGTGGTCGCGGCAGGGGTGGAGCTGGAGGTAGAGGTCGTGGGAGAAAGGACGCTGTTGAGAAGTCAGCGGAGGAACTTGACAAGGAGCTGGAGACCTATCATGCTGAGGCCATGAACATCTCTTGATCTCGGAAGCCNCAGTTTATTTTGTAATATTACTTAAGATTGGCTTCCTTGTACNAAAGCTCGTTTCCTTGGCGTTTACTTTGAATC…
Gma.15407.3.A1_s_at	CD393885	At5g52040	1e-34	Post-Transcription			GCCGGAAGGGCCAACTGATTGTAGTACTGTTTCATGGCTGGACTAAATTTCATTTCAGCAATTTGTTTTAGTGTAGTAGTGATAAAGCTCTGAAACTTGTGTTGTTGTGACAACTTAGTCCTTTTTTGTTTAGTTAGTTTCATATTTATTTGTCAGCTTAGTATTGTAGAATCTTTGTTTACAGTAAAAAGATGGTACTATATCTTTTGATCAATATTGGCGAACTTGGCA
Gma.15462.1.S1_a_at	AW350341	At2g37220	1e-72	Post-Transcription			GTCTTGGAAGCTAGGGTAATCTATGACAGGGAAAGTGGACGATCTAGAGGCTTTGGATTCGTGACTTTCGGTAGCCCTGATGAGGTCAAAAGTGCAATTCAGTCCTTAGATGGTGTGGACTTGAATGGCAGAGCTATACGAGTCTCATTAGCAGATTCCAAGCCCAAGCGGTTCTGAAGCTTTTCATCTATACCCGAGAGAGGATTTCGGTAGTTGGGACTTGGGAGTTATACAGCTGCAAGATGTCATTGGCAATCAGTTTGGACAAGAAATACACTTACATGCATTGAGACTA
Gma.15462.3.S1_at	BQ298325	At2g37220	1e-66	Post-Transcription			AAGCCCAAGCAGTTCTGAGGATTTAGCTTTTCGTCTATACCCGAGAGAGGATTTCGGTATTTGGGACTTGGGAGTTATACAGCTGCAAGATGTCATTGGCAAAAACAGTTTGGGAAAGAAATACACTTACATGCATTGAGACTACATGTACACAGTTTCAATATCTGACAGGCTTCTTCCTAGATGAGTGTCTGTTGAAAGTTTAAATGTATGTTCCAAATTTGATGGTTGTCATTTGAAACTGATTTGTAGTCCGTATTTTCACTATAGAAGTAGATGTCTCAAATTTATTGGTTANNNCGTTCCAATATTGTTGTGGAAGAATTTTATAATCGTGATGTGCCTGGAAAATTATCTACCANNNANNNANNNNNNNNNNCAATTGTTTGCTGGGGAGAG…
Gma.15591.1.S1_at	CD414588	At1g10650	3e-53	Post-Transcription			ACTTCCTGAACATTCTGGCTGCGCCTATAAACTCTACTCACAAGAGCTACCAAGATATGGAGAATCTGACTTGTAGAGCATGCAAGGTGAAGACAGTTTCGATGTTGTTGATGCCTTGTAGGCACCTGTGCTTGTGTAAGGATTGTGAGGGATTTATCAATGTTTGTCCTATATGCCAATTGATAAAAACTGCAAGTGTTGAGGTGCATCTGTCTTAACTTACAAAGAACGGGATATAAGTCACTGTTTTCTTTGTGNNNTNNNNTGCCTAATTTCTTAATGTTCAGCTCAAAGTAATTTGTCTCT
Gma.15848.1.S1_at	AW348925	At4g02840	8e-40	Post-Transcription			ACCCAGTTACTTTGGATCATCTCAGTGTGAGAGGCAACAACATTCGATATTATATCCTTCCTGACAGCTTGAATCTTGAGACTTTACTGGTTGAAGAGGCTCCTAAGATCAAGCCTAAGAAGCCAACTGCTGGGAAGCCTTTGGGNAGAGGGCGGGGGCGAGGACGTGGNCGNGGCCGTGGTCGTGGNCGTTAAGTTGCACATCACAAAATTTGTGGCATTTGCTTGTACCTTTATTGTAGGGAATTTTTCGGAGAGAAGTTTTAAAGACGTTGCAGGAGTGCTGTTGTTAGTTAGTCA
Gma.15861.1.S1_at	BM523547	At5g09900	0	Protein Destination & Storage			GAGTGTTTGCTCATTTATATTCTTTTGCCTGGTTGATTTTTTTCCCCTCTTGTACCTCTTCTTTCTTCTCTATATTACATTTTCTTGTGAAATTTGGACGTNNNNNNNNANNNNNNCTGATGACAAGCAAAACACCTATTTATTTGAGTGCAATGA
Gma.15883.1.S1_s_at	AF255338.1	At3g14290	3e-90	Protein Destination & Storage			TACACTGATCCATCTGGCACATTTTGGCAATGCAATGGCAAAGCTATTGGTTCAGGGTCNGAAGGNGCAGACAGTTCTCTACAAGAACAATTCAACAAGGACCTAACCCTTCAAGAAGCCGAGACNATTGCTTTATCCATTTTGAAGCAAGTTATG
Gma.15788.1.S1_s_at	BU550067	At4g21660	3e-45	Protein Destination & Storage			AATTTGTTGTTAGCATTTAACGCAACTGTATTATTGCCCGAAAGTTGAGAATTTGTTGTTAGCAGGGGTCTATAGACATTATAATACAATGAAGACTCCATGCAGANCACGCGGTGGTCAATCTTTAGTTGAAAATTCAATACGATGAATCCTACTGAGGCTTCACAGATAATGGCCGACGTGAATGTATGTTAGAGCAATCAATCATTCTTACTG
Gma.15831.1.A1_at	BG652101	At5g23540	1e-08	Protein Destination & Storage			TAGAGTTAGCTAGCATCGTCCATTGTATTGTTCCTTACTATAGTTAGCAACATTTCATTAATACTCTTGACATGTTTGTTAACAGAAATTGTTTTATTGTAAGTTTTTGCATTTTGTGTTTTCTTTAAAATGCAGGAGCAAAGCTACATTACATGTTAGAGGATGAAAATCATATTTTAATCTCTCTAAATGTAATGGAGGTCTTCGTGATCGTGCGCCAGTTTTATTTGTTTATTTGGCAGCCGTAGGATTTTACATATAAACNAAGTGTTGATTCAGTTGTAATTGGAATCGCGGAGCAACTNAAANNNNNNNTGAACTTTAGTACTATAATTTACNNNNNNNNNNNNNNNNNNNNNNNNNNNNNNNNNNGGATCAGTCAAACTGGTTTCTGAAATA…
Gma.1602.1.S1_x_at	BI971053	At5g67380	1e-157	Protein Destination & Storage			ATAGCTAAGGTGCTTGGGACTGATGAANTGAANGCATATCTNAATAAGTATCATCTGGAGCTTGATCCTCAACTTGATGCACTNGTTGGNAGNCACAGTCGNAAGCCNTGGTCTAAATTNATCAATGCAGATAATCANCATCTTGTGTCTCCTGAGGCAATTGATTTTCTTGATAANCTCCTTCGATANGATCACCAGGACAGGNTAACAGCNAGAGAAGCAATGGCACATCCATATTTCTCTCANGTAAGGGCAGCTGANAGTAGCAGAATGAGGACACAGTAACTTNANNCANNNNNGGATCCATNANCNTGAGTTNNANATATNTGGGATTGTTTTATAATACNNCCTNAAATGTGGCATGGTTGCCTTCTNTNNNANNNATNNNTTNTNNNNNNT…
Gma.1605.1.S1_x_at	BI425139	At1g48900	0	Protein Destination & Storage			TATCCCGAAATATGAATGCCCAACACATGAGCAAAGTCCTNCCTCCTCAGATGCTGAAGCAAATNGGTGGCATGGGNGGGTTACAAANCTTGATGAAGCAGATGGGATCTGCCAAAGACATGATGGGAATGGGAGGAATGTTTGGTGNTGNTGGTGGTGNNNATTAGTTNATTGGCTTNTGAGCTGAGGATTNTTCCNGACCANAGNCACTGTCATTNNATTGTGNNNTTTTACNACTAGANTCGANTGAGCAGGTTATGCAGTTCAATNGGNGTTNGAGTGCCATCTGNAATAGCCGCAATGGGTGCAAGTGTCTCTTTTTGTAAAATTAAATNCTTNTTCCCTTTTTGTGTATATTTACTTATTTANTATTCAGAGNAATCAANNNNNNNAGTAATC…
Gma.16563.3.S1_a_at	BE607683	At4g19006	5e-85	Protein Destination & Storage			TTATGTCGGGTGCATAATGCTGCTTTAAGAGCCCAACCAGCACTAGTTCAAAATGAGCAAAAGTTGTTGGAAAAGATCAACATTCTGTGTCTGATGGAGATTATATTCAGTCGGCCTTCGGAAGATCGAACTATTCCCTTGAGTGTAATTGCAGAGCGCACAAAACTTTCTATAGAGAATGTGGAGCATCTCCTTATGAAAAGCCTATCTGTTCATCTAATTGAGGGTATAATTGATCAAGTTGAGGGCACAGTGCATGTTTCCTGGGTGCAGCCAAGAGTTCTGGGTATTCAACAGATCAAATCCTT
Gma.16719.1.S1_at	BI970910	At3g11910	1e-180	Protein Destination & Storage			AATTCTTTCTGTCAACGGATCTCAACACTGTCTGCCGACCACNGCCCGTTGAGCTTTACTACTTCCAACTNNGTGTGGAAGTTGTTCAAGTTGNGGTCATTGATCATCATCACTNNACTGTANCAGTACATAAGATTTTTGGATTAGTGAGTGTATACAGGGTATAGTTGGTTGACTNTTTTTTTNNNNNGTTCATCTTGATTGCTTCCAGATTTTGTTCANTCAGTAGTGTTANTTTAAGTGANGGGCTGCAAAATGGTGTNNNGCAGAGTTAATGTAATGTTGTAAAAGAGACTCGC
Gma.16944.1.S1_at	AI736396	At5g22080	1e-08	Protein Destination & Storage			CTTATTTATGCAGGCCATCTTTTGTGTATCAGTTAGATACTTTTAAACAGATTTATTACTGGAGTCATTTGAGGCATGTTAATGGTGTAGACCTCCGACGAATGACTCTATCCACTTTGCATCCCAATACTGATAAATAGGAATTACTGGTCATCCGCAGCGAGCCATTTTAGTGTTAGGTTAAACACGGGTTTATGGAGAANTTGATTTCGATACAAATGGCGATTTCACCCATGCTGCTCGAAGATGAAAA
Gma.1751.2.S1_x_at	AI443536	At3g02090	1e-177	Protein Destination & Storage			AGATATTGGCCGTCAGTTACTCACATATGGTCGAAGAATCCCGTTTGCTGAATTGTTTGCTAGAATTGATGCTGTTGATGCCAGTACGATTAAACGTGTTGCCAATCGATTTATCTATGACAAGGATGTTGTTATTGCTGCCATGGGTCCTATTCAGCGTTTGCCTGATTACAACTGGTTCAGACGTAGAACCTACTGGAACCGTTACTAGTTCATTATAGTTTTTTTTTTTNNGCCTCATTTCAACTTCATGGGAGGTCTGGCATAATGTTTTATTCTAATTTACAACATTTATGCCTCTGTTTTTCATTTATTTGTTATGGGCCTCTATTTTGTAACAATTTTGCAGTAATAAGTATGCTGTTGTCAG
Gma.11305.1.S1_at	AW348829	At4g29040	1e-106	Protein Destination & Storage			AGATGGTTTTGATTCTAGAGGAGATGTAAAAGTGATTCTGGCAACCAACAGAATTGAAAGTCTTGATCCAGCTTTGCTACGNCCTGGTCGAATTGACAGGAAGATAGAATTTCCTCTTCCTGATATCAAAACAAGGAGACGCATCTTNCAGATACACACNTCNAGGATGACATTAGCTGATGATGTCAACTTGGAAGAATTTGTTATGACTAAAGANGAATTCTCNGGAGCTGATATAAAGGCAATATGTACTGAAGCNGGTTTACTTGCTCTACGAGAACGNCGAATGAAGGTGACTCATGCCGACTTTAAGAAGGCCAAGGATAAAGTGATGTTTAAGAAGAAAGAAGGGGTGCCTGAAGGGCTGTATATGTGAAANACTATCCTCTATNATCNCTN…
Gma.11246.1.S1_at	BU550454	At4g38600	4e-60	Protein Destination & Storage			GAATGGACCTTCAGAATCAGCAGATGATGACTTGCCTAGTGTGATGACATGTGCTAATTACCTGAAACTTCCTCCTTACTCTACCAAGGAAATTATGTACAAGAAGNTNCTCTATGCAATCANNGAGGGCCNGGGATCCTTTGATTTATCATGAGTTTCTGAAACTAACCAACCTTACCCTGCATGTTAATAGATGGNTCAGGGTTTATNGACTTTATTCTCGAGGNTCAGTTNTTTNTTTNNNTTGGTTGGATNTGCTTTGCTNCNNNNNNCTCGCTTCTCGAATAATAGTGTCTCATTTTCCGTGCTCAATGCAAATTGCAAGGTTGTGGAATTATTCAGTTGAATCGGGTCGCCACATTTTCAAAGTGTAGGGGAATTTACGGAGCTCTTATTTGA…
Gma.13248.1.S1_at	BM523367	At1g64230	1e-69	Protein Destination & Storage			GGAAGTATATGCCTTGACATTCTAAAAGAACAATGGAGCCCAGCACTAACCATTTCTAAGGTCCTTTTGTCCATTTGCTCANTGTTGACGGATCCCAACCCTGATGACCCGCTTGTGCCTGAAATTGCCCACATGTACAAGNCTGACANGGCTAAGTATGAAGCCACTGCTCGTAGCTGGACACAGAAGTATGCCATGGGATNATCATGCTCCTCCTTTAGCTGCNCANTNNANNTGNNNNATNNTNNTTTATGAAGAAACAANATNTACTTTTAATGAATGTTTTNTCTTTTTTTNGTCAGTGNAAATCAACCATGGTAAGGGAATTGATNNTNACTTNGTGAATATTTCTTTGCAAGACATCGGTCATGGNNNNNNNNAAGAAATTGTNNTANAATG…
Gma.10241.1.S1_at	BF069083	At3g07990	1e-118	Protein Destination & Storage			CTCCGCTATCTATGCTTCCAATATATCAAGAACTTATTGAAGGTGGTATCAGAATATGGGNNTNCAGTGGAGACACTGATTCAGTAGTTCCTGTAACCGCGTCTCGGTATTCAATCCGTGCCTTGAACCTATNTACCATCATCAATTGGTACGCTTGGTATGATAATGACGAGGTTGGTGGCTGGAGTCAAGTTTATGAGGGGCTTACATTGGTTACAGTAAGAGGGGCAGGGCACGAGGTTCCACTTCATAAACCCCGCCAAGGTTTTATCCTTTTCAAGACATTCTTGGAGGACAAGAACATGCCATTGCCAATTGATAGAAGCCTTAGTGGCCCAACTGATAAATCACTGAACAAGAACATTCGGTTGGCTAGGCCCATACGCAAGATCACTATGC…
Gma.10491.1.S1_at	CD391381	At3g51800	1e-147	Protein Destination & Storage			AATTTCCAATCATGCCATTCTCTGCTAGGGCTTTGGAAGAGAAAAGAGCTCGACTTGGTTTGGTGGAATGCGTCAACCATGAGCTCTTGCAGCCATATCCTGTTTTGCATGAAAAGCCTGGTGATTTTGTTGCACATATCAAATTCACAGTCTTGTTGATGCCAAATGGATCGGATCGAATCACAACTCATCCACTCCAAGAATTGCAGCCCACANAAACNATAGATGATCCTGATATTAAGGCCTGGCTAGCCTTGGGCACAAAGACNAAGAAGAAAGGTGGTGGAAAGAAGAAAAAAGGTAAGAAAGGGGAGAAGGCAGATGAGTCAGCTGAAGCTGAGNCTATGGACTCAACAAACGAGGCCACTCCTCAAGAGTGACTTAACTCTCCTCCCCTCT…
Gma.10511.1.S1_at	CD396171	At5g67250	0.0003	Protein Destination & Storage	Ubiquitin Degradation	SKP Family	TAGAGTTTCTACCAACCATTAACCAAACAACCGTGGCTGTGGCTGAGGCTGATGCTGAAGCTTCTTCAAGTAATAATAACAACCGANNNNNANNGTTAAGATCAAGGTTTGGGTTTTTGGCTGGTAGAAATTTAGTACCGGGTGCCTTCNNAAGATGGTCTAACGGTGATAATGTCTCCAGTAGCAGCAGTTTTGGATGATGTTAGTAAAAAAGCAGCAAGCCAGCAACCACATTCTTGCCAAGTTTGCATTCCTCCATATCTATAATAGTAGTTCTCATGTCGATTGCCTGTTCTTTGCAGTGTTGCTATGTGATTTTTTGTTTTTCATGTTAGTTGCTGATAGCAGCAGCATTTCTTTTGTTGACTAGATTTGTCAGTTACCCTCATTGATTGTCCC…
Gma.1101.1.S1_s_at	BI969248	At2g04160	8e-81	Protein Destination & Storage			ATTAACCTTCAAGGCCATGCAAGGAAAGGCCACAAATAACTACGCGTTTGGAAAACTGATATGGTCAGATGGCAAGCATTACGTCACGAGTCCAATAGTTGTGAAGGCCCTCTTAACTAGAAATTGAAGTAATTGNTGCAATTTAGCTCATTTNCATTTCTAATTGATTGNTAGCCTATTCTAAATTGTATGATATATCTTCNAAANTAGGGCTTCTTTGAGAGTTATCTCTGACATTGATTGATAACAAAGAAACCANCAAGTGGCTTTCTTTGGGTGTACTTTTACTATGATTCCAA
Gma.10918.1.S1_at	BI941629	At1g09130	2e-26	Protein Destination & Storage			GGGTCATTGATAGAATTCTTTGGCGTGGTCAGGAAAAGGTTATGGCAGATGTTGCTTCTCCAGATGACTGGGACAAGGGTGCTGGTATCAAAATTGTAGATGGATTCTAGTTCCTCTTTTGTGGATACGTTTCTTGT
Gma.10827.2.S1_s_at	BQ612452	At1g72610	3e-40	Protein Destination & Storage	Storage Protein		TCAAGAAACTTAAGGCTCGTTTCGGTGGCAGAGGCTAGGAATATTATTGCTCATGAATTTATTCCTATCTAATGTTTGTTGCTATTTATAGTCCATAATAATGCCTGTGTATGCCCTTGCCTTTTCCATTTCGATGTTTGGATCATGTACTTAAA
Gma.11179.1.S1_at	AW350100	At5g02500	0	Protein Destination & Storage			TGCTGGTGCAGCAGAGGATGAGTATGCTGCTCCTCCTTCTGGTGGAAGTGGTGCTGGCCCCAAGATTGAGGAAGTGGACTAAATGTAGTTGCTTTCCTCCAGATACCTGTTTTAAAAACTTATTTTACTTTATGCTTTTTTAATTGGATTTTAATCGCATGATTTTTGTTGGA
Gma.11201.1.S1_s_at	AW597749	At4g36760	0	Protein Destination & Storage			AATTGGCTGAACTCCTATCACGCCACATGTAGGAATATTCTGGCGCCATATTTGGATGAAGTTGAAAATGCATGGCTGAAGAAAGCCACTGAACCTGTAGGTGCATGAGCTGTGTTTGGAGTTGAAAAGTTAAATAACTTAAAGATGGTTCAGCGTAATTTTAGTGTCTTCCGTATCCATAATACTGTAATCTAGATTTTAGATATCATTGGGAATGGTTATTCCTTCAAATTACTATGCACAGCATATATAATATATCAATATTCTGCTGCATCANANNNGAGGGCGTGTACAACGTTAAATTGTCTATCCGCACGGCATCACTGCATGCATCAGCTCTTTTACTTTTCCCTAAT
Gma.11201.3.S1_a_at	BG239638	At4g36760	2e-56	Protein Destination & Storage			CAGGCTCGAAATGTACCATTGCAATCTTCCATGACTGTTACAGATGAACCTGGTTACTATGAGGATGGAGAGTTTGGGATAAGATTGGAGAATGTGCTTATTGTCAAAGAGGCTGGTACAAATTTCAATTTTGGTGATAGAGGTTACTTATCTTTTGAACACATTACCTGGGCACCATATCAGAC
Gma.3735.3.S1_at	BU764012	At2g02760	2e-63	Protein Destination & Storage			CATTCTCATATTATTGTCGCCACTTCGACCTCAATCA
Gma.3757.2.S1_a_at	AI941326	At3g46460	1e-48	Protein Destination & Storage			ACTATAATTGGACCTCCCGATACTCTTTATGAGGGGGGATTTTTCAATGCCATTATGAGCTTTCCACCCAACTACCCAAATAGTCCGCCATCAGTGAAATTTACCTCAGAGTTATGGCATCCCAATGTGTACCCCGATGGGCGAGTTTGCATATCAATTCTTCATCCACCCGGTGATGACCCAAATGGTTATGAGCTTGCAA
Gma.3341.1.S1_at	BQ299022	At4g28880	1e-55	Protein Destination & Storage			GCTTTTTTCCTAAGGTGACTGCAAACGATTGTTTGGTATAAATTACAGACTACCCAGGCTTGGCTGCTTTGCTGTATATAGATTTCAAATGTGACACGCAGCAATCTTGTGTATCCATGTTTTTATGTAAAATTAATGCGTGAATGTAGCCCTGTTTCCCCTTTTTGTTACTTGATGATAATTATCATTGGGCCATATGTTATATGGTGACTCAGTTTCATTTAAATTGATTGACGATATTATGAATTGTAGGTGTATTTTCAGTTGGTTCTGTTAAGGTATATTT
Gma.3353.1.S1_at	BI944024	At1g79940	1e-126	Protein Destination & Storage			TTTGACTTGCTATTGTTTGTGTGATTCTTGGTTGGGCTGTGACAGAAGGACAAATTTAAAGCTCAAAGTTTTGAAACGNACTCGGGCTGGCACCAGGGNTGCTGTTTTGGCTGATGAAGGACCTATCATGGAGGATGGAGTTGAGGAGGATGAGGACAACGAGGATGAAGAGTATGATGATGACTANGAGAGTGAGTACAGTGAAGATGAAGANGATGNNCAGAACACAAAAAATAAGNAACAAGCTGNCAATGGCNCNGTGAATAAACATGGNAAAGCTGCAGAAAGTTCAGGCTCTGANGANGAATGAGAAGTTTTTTCTAACATNANAGAANCNTAANTTTCATCTTTTNCCNTCTTGGATGGTAGAANTATNAACTTGTAGCAGTAATAGTCTAN…
Gma.2490.1.S1_at	BG043633	At4g30600	1e-164	Protein Destination & Storage			GATCAGCTTTCGAAATTCAACCAGAAATTAGCCGACCTCTCAACATCTCCCACACCCAGATTGATCGATGGGATCTTGCTCACGAAGTTTGACACTATCGATGATAAGGTGGGAGCTGCACTCTCAATGGTTTACGTATCTGGAGCTCCAGTAATGTTTGTGGGCTGCGGACAGTCCTATACTGACCTCAAGAAACTCAACGTCAAGTCAATTGCGAAGACTCTCCTTAAATGAGGGAACAACATAAACCTGTCATGAATGTTTCTGTTTGATGAGTAACTTGATTATCCCCGTAGATCCCCATTACATCGTAAGACAACATTGACGCAATTTGGTTTGTTTAATTTATATTGGTAAGCTTCTTTCCTCTGTTCACCATGAGAATAACGCGTAAGGTGT…
Gma.2977.2.S1_a_at	BU762524	At5g13780	1e-49	Protein Destination & Storage			AAATGGTGTGCATAAGGAAGGCGACGGTGAAGGACCTTCTGGCGATGCAGGCGTGCAACCTGTTCTGCCTCCCTGAGAACTACCAGATGAAGTACTACCTCTATCACATCCTCTCCTGGCCCCAGCTCCTCTACGTCGCCGAAGACTACAACGGCCGCATCGTC
Gma.1973.1.S1_at	BE347331	At2g30110	0	Protein Destination & Storage			AGATGAGAAGGCCACCAGTCTCTCTACAGCTTCTATAGATGATGCAGCGGTTATTAATGATCTAGTAATCAAGTTAGAGAGGTGCCGGGCAAATCTTTCACCAGTGTTCAGGATGAAACCAATCCAATTTGAGAAGGATGATGACACAAACTACCATATGGATGTGATTGCTGGGCTTGCCAACATGAGGGCACGGAATTACAGCATTC
Gma.449.1.S1_at	AF243379.1	At2g30860	5e-69	Protein Destination & Storage			CAACTTGTGTCTTCATGGTTTGTTTGGTTCACTATTTGGTGTGACTCCAGATCCCAAGGTGATTGAGGAGAGTGAAGCAAAGCTGGTACAAGTGTTGAACATCTATGAGGAGAGGCTCTCAAAGACTAAGTATTTGGCTGGGGATTTCTTCAGCATTGCTGATATTAGCCACCTTCCATTTCTTGATTATGTTGTGAACAATATGGGGAAAAAGTATTTGTTAGAGGAGAGGAAGCATGTGGGTGCCTGGTGGGATGACATTAGCAGTAGACCATCATGGAACAAGGTTCTCCAGCTCTACAGAGCTCCAATCTAGTTGCTAAATGAGTTTCAGGGAAACTGCTATTAGTGTATCATCTTTGAATATGTTAGTCAAGAATAAATGTACTTTTAGCAGAT…
Gma.4089.1.S1_s_at	U21722.1	At4g25200	3e-42	Protein Destination & Storage			AGCGCTCGTCGCTACACTAGCAGGATTGACTTGCCGGACAAGCTCTACAAGATTGACCAGATCAGAGCTGAGATGAAGAACGGTGTGCTCAAGGTCGTTGTGCCGAAAATGAAGGAGGAAGAGAGGAAAGACGTGATCAGTGTTAAGGTTGAGTAGAACAACCCAAGCTGATTTGGCCATTTTGCATCGACACTACTCTTTAGTTTTCTTTTATTAGGTGGTGATGAATCTAGTTAGTAGATATAACAGCTTAATAGTATTGTTGCTGTGTTTGGTTTTGAAACTTCAAACGTATCTGTANTAATTGTTATATAGAGTTGTGAATGAGCTTGTT
Gma.3935.1.S1_at	BE609506	At1g11660	3e-58	Protein Destination & Storage			GCTTCTCCATCTCCAGAAGACAAAGACAAGCCGGATACTTTCAATGATCCATGAATACATTGATGTGATTATACCACATGGAACTGAAGACCCAAGTTTTCATCACTGATACCATCTGACAAATATAGAAAAAAAANGTTTCCTTTCATTTTTGCTTTGCAGCGATTTGTATTTTCATAATCTATCTAATATTTTCTGATATGATATAGTTTCTTCAAATGAATCGAATAGATTCTGCTTTAGGGAAGAAAAAAAATGTGTGAAGTATTAGTGGCACTTGTTTCTGCTTTGTGCTCAAATAAATTCTTACAAAATTGATTGGTCAATCTCGAATAATGTCGGAGTCTGTTGTGAAGCTTTTAGCATATAAGAACGTGTTACGCGGCTTTAT
Gma.5204.1.S1_at	BE022964	At1g73760	2e-59	Protein Destination & Storage			CAATTTTGGGATGATACATCAAAGCNNCAAGTAGATAAAGAGTGCAGCATTTGTCAGGAGGAGTATGAAGCNGGNNATGAGTTGGGGAGGCTAAATTGTGANCACANNTATCACTTTCAGTGTATAAAACAATGGGNTGCACAAAAAAATTTCTGCCCAGTATGTAAGCAACAAGTTGCGGCTCGACACTGAGTGACNCAACCCTNCTNNTNTTTNNNNNAGCTTCCATTCTCATCCATAAATTTGTGTATAGTTTTNCATATCCAATACAAGCAAGANTTTTCATTCTNTGCTGTCAATNATCATTTCATNTTTCAAAATTCCTGCATCCTCTGCGAGNANTCGGCAATTATATGTTATNGAGTAAAGGTTTATATTCGGGCTGAGACCTTTGCATAT…
Gma.5204.1.S1_x_at	BE022964	At1g73760	2e-59	Protein Destination & Storage			CAATTTTGGGATGATACATCAAAGCNNCAAGTAGATAAAGAGTGCAGCATTTGTCAGGAGGAGTATGAAGCNGGNNATGAGTTGGGGAGGCTAAATTGTGANCACANNTATCACTTTCAGTGTATAAAACAATGGGNTGCACAAAAAAATTTCTGCCCAGTATGTAAGCAACAAGTTGCGGCTCGACACTGAGTGACNCAACCCTNCTNNTNTTTNNNNNAGCTTCCATTCTCATCCATAAATTTGTGTATAGTTTTNCATATCCAATACAAGCAAGANTTTTCATTCTNTGCTGTCAATNATCATTTCATNTTTCAAAATTCCTGCATCCTCTGCGAGNANTCGGCAATTATATGTTATNGAGTAAAGGTTTATATTCGGGCTGAGACCTTTGCATAT…
Gma.5860.1.A1_at	BQ253615	At1g08040	6e-41	Protein Destination & Storage	Storage Protein		GTAGAGCCAGCACATGAAAAAATTGGTGTAATTGATTCACAATGGATTGTTCATCAAGTAATTCCTTCTCTTGGGAACCAGGGAGAGTCTGACAAAGGAAAAGGGCCAAGGGATTCGGTCCGAGCCAGATGCAGAAGTGAATGGGCCCAGTTTCAACTTCGCGTAACCAATGCTGACAAGTCTTATCTTGAAGGACTTAAACGTAATGGGAAGGGTTGATGTGTGGATCCATCTTCCTATTGTACATGTTTTATGTACACTCTCGGTGGTAGAAGTATTTGTTTTGTATTCTTTCCTCCCCTCAGGTGCCATGCGTATTTTCTGAGCCTTATTTTTGAGGAATTAATTTATAGCGATGTAAGTCCATCACTTTTATGTTATTGAATAACTTTCTATCAG…
Gma.5792.1.S1_at	BG649960	At1g20200	0	Protein Destination & Storage			CAAATATTTAGGACGATGCGAATTCTGTTCAGAAGTTTTATTATTAGAAACTGTTACCCTGGAGGATTTATTGAATTATAGCATGACAATCTATTTTTCTG
Gma.5390.1.S1_at	BM092018	At5g49980	4e-15	Protein Destination & Storage			ATCATAACGGAAAACTGCCCAAGGAGGGGGAAGTAGAGATTGCTCAAGCTGCTCNGAGGATTGGTTAATAAGCATTATTTCATTTCCTTGGTCAAATAGATGNTACNTTGAGAGCAGATTCAGAAGGATCAAATCAGAAGGTTTTGGAGAGGTGATGTTCTCTAACTTATCCATCATACCTTACCAGTAGAGAAGCAANAAATGTGTATTCACTTTGNAAGGAACTTANTCTGTTTATTTNGGATTCAAACNATANTTAGTTGAAGCTTTGGCTNGCCNAGAATCCAAACCCCAGACTGTGATATAAACCTATCTCTGTCTCCCTAATTTCAAATGTTTTTTTTTTCCTTTCTTTTTTTAATGTTCACGGTCCACGGATGTGTTGCTGTAGGACCTGAC…
Gma.5421.1.S1_a_at	BI968175	At1g52600	2e-96	Protein Destination & Storage			ATTCTCATTGGTGCTTTGGGGTTGCTCGTGATAACTTCGAAAGATTAAATGATG
Gma.5625.1.S1_x_at	BI426935	At5g50870	9e-75	Protein Destination & Storage			GCTTCTTCTGTACAGCACCCAAGATTGAAGATGATAGACCTTGCGCGCGTGCAGAAGGAGCTNGTGGAATGCAGCAAGGACGCGGAGGGATCGGGCATCAAAGTCNGCCCCAAAANCGACAACCTTGTTCTCTTGATCGGCACCATTCCTGGCCCNGTCGGAACTCCNTATGAAGGGGGCATTTTCCAGATTGATATCACATTGCCNGATGGGTACCCGTTTGAACCCCCCAAGATGNAGTTTAAAACCAAAGTTTGGCATCCTAATATCAGCAGCCAAAGTGGAGCTATTTGCCTGGATATCTTGAAGGACCAGTGGAGCCCAGCACTCACTCTGAAGACTGCACTTCTTTCTGTGCAAGCACTTCTCTCTGCTCCNCAGCCTGATGATCCTCAAGAT…
Gma.5933.2.S1_at	BG237145	At4g00300	1e-17	Protein Destination & Storage			CAAAAGATTGGCCATATTTAGTCAGCAATTTAATAAGTTGTGTGTAAAATATCAGCAAATCTAGCCATTTGAGGTGGCTTTCATGAGAAAAAGAGAAACATGAAGGAGCATGCTGCCGATCAAGCTAGAAAAGGAAGACATTCTGAAAGCCCGGCTAATACCAATGTTTTAGGGATTGTTGTATTATATCTAAGTTGCCTTACTTGTTTATATCATAATATTAAGGCATCCCTTTTGCCTCTAGACTTTGTTTTCTTACCATTGTTAATTTTGCTCTGTTTTGTAATGTTGTAGCTTTCCTCATTGTTATTGCTTGAACTTTTGAAAATACGTATGTAACTTTCATATTGAGTGGTTGTATGAATATATATACTGATGCCCCAAATTAT
Gma.6468.1.S1_at	BU761589	At2g32920	8e-08	Protein Destination & Storage			TATGCTCCTCTCAAGAGTGCTTTTGAACTTGACCAGATTATAGAATTTGTGAAAGAAGCNTGGNCGTGGAGGCAAAGGGAATTTGCCCCTGCAAGGCACTCCAACCATTGTAAAGACAGAACCNATGGGATGGAAAAGATGGAGAAATAATTGAGGAGGATGAATTTTCTCTTGAAGAACTAATGGGGGAAGATGCTTCAAGCAAGGATGAGCTATGATCAATTTATAAGGAATTTATACCAAATTAAAGTTTCAACCACCGATTTTTACGTTACAGGCAACTTGTTTCTCATGATTATTGTGATCACTATTCTGTTTTTCCATGTTCCAAGTTAAAAAACCAGTCTAGTGATGAGTGATCTTCTCTGAGGATTTTGATATATGTCATTCAGTGGGTAC…
Gma.6804.1.S1_at	BE657581	At5g10080	8e-41	Protein Destination & Storage			ACCATCTTTTGTTTGCCTGTAAGCCCTTCTGCTGATGACTACGCTGCCATTGGACAGAACTTCCTGATGGGTTATCGATTGGTGTTTGATCGGGAGAATCTAAGGTTTGGCTGGTCTAGATGGAATTGCCAAGATAGAGCTAGTTTCACATCACCTTCCAATGGGGGATCACCAAACCCTTTACCGGCAAATCAGCAGCAGACTGTCCCTAATGCTCGTGGTGTACCGCCTGCCATTGCTGGACACACGTCCCCCAAACCCTCTGCAGCCACACCTGGACTTGTTACTACCTCTAGGCATTCCTTAGCTTCATTGTTACTGATATGTCACCTTTGGCTTTGGTTATCTTGTTAANTTTAATCTTATTTGCTTGTAAATTTATCTTGTGTCCAGACTCAA
Gma.6391.1.S1_at	CD403463	At2g04160	5e-38	Protein Destination & Storage			AATGTTGGGCCACCAAGCACATACACTGTAAGTACCCGCTCGCCAAATGGATATAGCATTGCCGTTGTGCCACCTTCCTTGACTTTCACGAAAATTGGTGAAAGGAAGACATTCAAAGTCATTGTGCAAGCAAGCAGTGCAGCTACGCGGAGAAAGTATGAATTCGGGGATTTGCGTTGGACAGACGGAAAGCATATAGTAAGGAGTCCTATTACAGTTAAGCGCAGATGAAAATTCCCAAATTGGTCGAGTTGGTTGTGTTGTATTGTGTGGATGCGTGTGTGCATGTTTAGATATAAGGTAGTTGGACTCTATATAGCTAGGATTTTCATGNTTATGACATAACTGTGTTGTTCCTTGGTTCCTANNNNNNNNNTTGGTTATCAGTATCACTGTATA…
Gma.6633.2.A1_at	AI442440	At1g50490	4e-42	Protein Destination & Storage			GAAGAATATGTTGTCCTCCTCAGGAAACGCAGATATCCCAGAATCTCCACTCATCATCAAAGCCATCAATTCAGATTGCAGCCTTTTGAGTACAGATTGAGAATCAACAGCCTTAGCAGGATGTAGAGGCTGCTTAGCGGGAGGAGCAATGTTGGATTGAGCAGATTCAGTGTTCTTNNNNNACACAACACACCATAATTTATTTTATATACAATCTTATGGTGCCCAAGATGCAGATGCATGGACTAATTAAACAACAACGTTAGTCTGATNNNNNGTGTCCATAGATAAATTGGGTACCCATAAAATGGCCTTGCTTCCAAGGAAATGGCAAACAGGGTTAGTTCCAGGATCAACTCCCATGAGTTCATGAAGCATGTGATGATTCATTCCAGAAGT…
Gma.6633.2.S1_at	BE020127	At1g50490	4e-42	Protein Destination & Storage			AGAACACTGAATCTGCTCAATCCAACATTGCTCCTCCCGCTAAGCAGCCTCTACATCCTGCTAAGGCTGTTGATTCTCAATCTGTACTCAAAAGGCTGCAATCTGAATTGATGGCTTTGATGATGAGTGGAGATTCTGGGATATCTGCGTTTCCTGAGGAGGACAACATATTCTTCTGGAAGGGAACAATAACAGGAAGCAAAGATACTGTGTTTGAAGGCACAGAGTATAAGCTATCACTCTCCTTTCCCAATGACTACCCTTTCAAGC
Gma.7101.1.S1_at	BI471297	At2g27350	1e-128	Protein Destination & Storage			AGCCGAGGGTCGGTTTTACTCTGATCTNGAGCTCACAGAAAAGGAAATTGAACGCATGGTGATNGAAGTTTCTCGAGCTGAGTACCTTGCAGATAGTNCATTTAAGCAACAGCTTGGNNANAGAGANTCCTCTACCTCAAANGCNGAACCATCATCTTCTGGAGCAACNGGNTCATCNGGCACTGATCGCAAGACGGAACATGGGANAGAGCATGGTTCTGATCTTAGTAGCGGTATGCAGATGTTACTATCAATGGGATTCAGTTACATGCAAGCGATTGAGGCTTACAGCATATTTGGGGACGATGTTGATTCNATGGTTTGTTACCTGTTAGAAACNGGCAGTAGCAGCAGACGTAAAGGCAAGGCCACTGAATGACATGCCATCAAGTNAAATAA…
Gma.6954.3.S1_x_at	BF067399	At5g17710	3e-71	Protein Destination & Storage			GATGAAACATTTGCTTCACCTTTCTTACTGTTACTTCAATCGTACAAAGAAGCATTAGCTAATAACGACGAAGTCAAAATTGCTGAGTTGGAATCGTCATTAAAATCCGTTGAAGATGAGAAAATAGAACTTGAAGTGAAAATAGCTTCTTTGTCAGAGGAGTTATCAGTAGAAAAGGATCGGATTCTAAGGATTAGTGCAGACTTCGACAATTTTCGGAAGAGGACCGAGAGAGATCGCCTTTCACTGGTCACAAATGCTCAGGGTGAAGTTGTGGAGAGTTTGTTGCCTGTATTGGATAATTTCGACAGANNNNAAAAACCCAGATTAAGGTGGAGACAGAGGGAGAGGAGAAAATAAACAACAGCTATCAGAGCATATATAAACAGTTCATTGAAA…
Gma.7176.1.A1_at	CD407127	At3g19170	5e-64	Protein Destination & Storage			GATGTAGATGCGTATCAACTTCCTGATGCCAAAGGTTATAGTAGTATGTTGCGGTACTTACTGGGTATCACAGAGGAAGAAAGGCAAAGGAGACGTGAAGAGATATTATCTACTAGTTTGAAGGACTTCAAAATTTTTATGGATGCTATGGAAGCAGTTAAGGATAAAGGGGTTGTGGTTGCAGTGGCATCTCCAGAGGATGTAGATACGGCCAACAAGGACCGTCCCGACTTCTTTCAAGTGAAGAAAGCCCTTTAGTTTCAGTATCTATTCCCCGCATGGATTTGAAATTGTATCTTTTCTTAAAATTTCATACATCGAAACNAATGTTTCCTTGATTATTTGTTTAAATAGGTTAACTGGCTGGAGCTAGATACGAGAATTTA
Gma.6975.2.S1_at	BU546346	At1g71980	3e-22	Protein Destination & Storage			GAGACACGTCCATGCAGTTGAACCAGTAATTGCCAAGTCTTGAACTAAAAGGTGACCATGGATGACTGGTCGATATTTGGGCGTAGCATTTCCTCCTTTGTCTCCTCTGGCATTTGACTTCCTTCTTGGCACCTGGTGTACATTGTAGCTTCTCTGTGGTGTTAGTTTCATTTTTACATGTGCTGGTTGGCGAGCTTGCATACAGTCACTAGTGTGTATTGTTTGTACTTTGGATATTGATGTTTTCATGGCCTTGATGTCAAAGTATAGTCAACTGCTAACAAGAGAAATGTTGGGCTGAAGTAAGAAGAGTTCTTTAAGTTCTTTCTAGTCATGAGAGATCATGTGATGTGATACTCTAGTGTT
Gma.6975.2.S1_a_at	BU546346	At1g71980	3e-22	Protein Destination & Storage			CATTTGCATCGACACACTCCCTTCCGGAATGTTAAATTGTTCAATTGATTATATCATATGATTGAGACACGTCCATGCAGTTGAACCAGTAATTGCCAAGTCTTGAACTAAAAGGTGACCATGGATGACTGGTCGATATTTGGGCGTAGCATTTCCTCCTTTGTCTCCTCTGGCATTTGACTTCCTTCTTGGCACCTGGTGTACATTGTAGCTTCTCTGTGGTGTTAGTTTCATTTTTACATGTGCTGGTTGGCGAGCTTGCATACAGTCACTAGTGTGTATTGTTTGTACTTTGGATATTGATGTTTTCATGGCCTTGATGTCAAAGTATAGTCAACTGCTAACAAGAGAAATGTTGGGCT
Gma.7443.1.S1_a_at	AW100678	At4g30890	3e-79	Protein Destination & Storage			GATGACCAATCTGTCTTTGCTATTGGAACAAATAAGGTGCTGCATGATCAGGCATATGTNCTTTTCTACAGACAGATNTGAACATATANATATTGTTCTNTCAAATATCTACTCCCTNNNNNNNNNNACAGAAAAAACACTACTCCCCTATAAGAAAGGATTNCNGGTCGATTAATGTCNTGCATGGAGAGAAAATGTGGGTGATTATTTATTAGCTGGTGAGGGTACCATAAATGGTCGATCCAATCCAGTGTGTGAAAAAGTAATTGTTGTAATATTCTTTTTGATATTGTCTTAAACTGAAAGTTTTGTAGTCTTAGTGTAGGACATGGGTATGTATTTATGGTAA
Gma.7767.1.S1_at	AI494936	At4g21660	2e-28	Protein Destination & Storage			AGAGAAGTTGCGTAGTCAGCGTGAAGATTTCAGTGACATGGTTGCAGAGAACGAGAAGAAGAGGAAAAGAAAGATGCAAGAAAAGGAGGGCAAGTCAAAGAAGAGAGACTTCAAGTTTTAGGGTGCGCCTAGTTCGTTTCTTTTGCTGGAAGATGGGGGGGCTGCTACCCTTTTCTACTGGGCAAGTTCTAACATTCCATGAGCCATGAGTTGAGAATTTGTTGTTAGCAGGGGTCTCAATTGATAAGAATATATAATTATATACGACTATATATAATACAATGAAGACTCCATGCAGAGAACGTGGTAGTCAAGCTTTAGTTGAAAATTCAATACGATGAATCCTACCAAGGCTTTACGGATTCTGGCCGACATGAATGCATGTTACTTAGAGGAA
Gma.7865.1.S1_at	BI425094	At3g24590	1e-43	Protein Destination & Storage			ATTAACTCATGTGCCCAATGGTCATGTTTATGTGTTGGGGGATAATCGTAACAATAGTTATGACTCCCATGTGTGGGGACCGCTTCCTGTGAAGAACATAGTTGGAAGATATGTCACGTGCTATCATAGACCAAGAAACATTTGACAGAGATATCATTGAGATGTATTGAAGGAACTGGTGTTCTTTTACTATGGTCTGACNAGTGGGACGGCATACTAGGCCATGTCATGTGATTTCCATGAAGAGTTCCCTCCAGCTGTTCCATAAATGATGCACATCATTTAGCCATTCTTTATGGGATTGGATTCTCATATGCATGTAGTGAGGTTTCCCTCGTTCAGAGCATGAAATGAATCTACTGAAAAAATGTCATGTGATTTCTGAAGGGTTCACTGTTA…
Gma.8060.1.S1_at	BG725572	At1g51710	2e-79	Protein Destination & Storage			GATGACAATCCCAAACCAAAACTAGAAGAAGACATCACTAGACTATCTGGAGGAGGTGATTGGCACATGGCGTATATAATCATGTACAAGGCTCGTGTTGTATCTGTGTAATTGCTAGGAAGAGNCGATTTGGTGTTTTACTTCAGAGAATCAAGGATTGTGAATGAGAAATGGTTTATTTGTTTTCTACTCCTGAGGTTTGATGCTCATTAGTCGGTATTTATTTCGTTTAGGTATTATATTTTTTTTAAAGGATGCATAAGGATTTGAAATGAAGCATGGTACCCCTGAATCTCCTTCCTTCCATCGACTGGGTCCAAGAGGCACTT
Gma.8094.1.S1_at	AW309295	At2g27600	0	Protein Destination & Storage			AACAGGGTGCAGTACAAACCTCAATGCAAGAGCTTGCTGCAAAAGGACTTGCTTCTAAGATCCTTCCGCCCCCTATTANGAGGACAGATTTTGAGAAGGTACTCGCTAGACAAAGGCCTACAGTAAGCAAAGCCGACCTTGATGTTCACGAGAGATTCACNAAGGAATTTGGAGAGGAAGGTTAANTACTGATGGAATTTNCACTTTGAAGGTCCACACTGGTTTCAAATATATTGTTATAATTTGTAATTTNTTNAGCNGTTGGATNCAAATGAAATGCATCTNTTTCATTTTNNNNTGGGGATGTAAAGNCCCCTTTTGTANCGAGGTGGATTTATAAAGGTCGATACTCATTTTTCTTCT
Gma.7999.1.A1_at	CD396393	At2g25490	6e-17	Protein Destination & Storage			TTTTTTCGCAAGCATTTCGAAATGCTTGTTCCAACTTAAACCCTTTAGGCCTTGGCTTACTGGGGCCTCTTCTTTCATGACTAGGGTCCCCTGAGAATACAGTTACTAAGTCTTGGTTTGTGCATGCTTATGCTAGGTCTTATTTTGTACTGCTGGATGTTGACAATAAATAACATGCTTTAGCTTCTGTCGCACATTTGCATAATGTTTACTTAGACTTAAGCTTAAGTTCATGTCTTTTTAAGTCTTCTGTCTTTTTAGTTTATACCAATCGCTCTTCACCATGACTTAGAGTGTGGAAGAGGCTTTAGCTTGTTTTACTCCGGTCTTGTCAGGGTGGTTAT
Gma.9031.1.A1_at	AW349324	At4g03190	8e-14	Protein Destination & Storage			TATCTCTACTCCTACTTTGAAGTTCAAAATGTCCTTGTCTTTGGTNNTCTCCACAGATGGCAAAAATCCATNNTGATATTCAAGACTCAATAATATGGCAGGTGGGAGGAAGAAAGGGGGATTCTGCATAAACTATCCAGGAAGTCACTGCAAATGTGAGCTAAATTAATGGATTCCTGAGCAATTATTGTGAACAATATCCATATGCATGAAAAATATTGCATTGATTACAGACAGAAAGTTCTATAATTCAAGAGGATAATGTATTCATGGCAGAAGCCTGTACTTATCTGTGGCTTTTTGTTCTGATTGAAATATCTATTCAACAAAATGCAACATTCCCTTCT
Gma.9743.2.A1_at	CA935920	At5g61970	3e-22	Protein Destination & Storage			ACTAGATGTTTATGAGTCTGCTGTGGGTGATTCAAATGTGAAGTGTACACCACGCATTGCAGGCTTCCCTCCGGCTTTCCAGGCAATTTCCCGTAATCCTATTGTGCTGGATCTGGCTTATANCATGATTGAATTCCCACCTATTGAAAACAGGATGAAGAAGGATAGAAAAGCCAAGGGCGGCTTTATCAGTAGAATATTTGGATGAGTATATTTAATTAGGGTTTTTGATAAATATTGACAACTGATCTGGTGATTTCTTTTGTGGAAT
GmaAffx.248.1.S1_at	AW311298	At1g04040	1e-36	Protein Destination & Storage	Storage Protein		ACTAATCATAGCAGGCCTCTTCATTGGCTTGGTGAGTCCACAATGGAACATATTGAATCCAAAATGGGGAAGAAGTGATGAAGTAGTGAATCGTCCGGAATGGAACATATTGAACCAAAGATTGGGAAAAGGGGTTGTTGTTGGAGACAACTTGAAGAACTACTGCGAGAGTTGGAGGATAAATGTTGAACTAAACAACATTAGAGGGTTCAGTGTTGTGCCTCAAGAATGTGTGGACCATGTGAAGAAGTACATGACCTCATCTCAATACAAGGCTGATTCTGTTAGAGCAGTGGAGGAGATTAGGCTCTACATGAGTGGATTCTGCACTTTGAAAGATGATGGCAAAGATTCCTGGATTTTTGATATTGATGAGACCCTTTTGTCCACAATT
GmaAffx.40313.1.S1_at	CD392715	At1g05150	2e-65	Protein Destination & Storage			TTGGCATCATGCCTAGTCTGGTGAAGCTTGAAACTGGGGATAGAAATAGGCATGGCGACGTGGTGTGCTCTGTTTGCCGCTACCCAATTATTGGTTCTCGGTTTAAGGAGATAAAATCTCATTNTAGTTTGTGTAACCAATGCTACAGTGAGGGAAAAGTGCCTTCTNCATTTAAGCAGGAAGAGTACAGATTTAAAGAGTATGGAAGTGAGGGTGAAGCCATGAAAGATAAGTGTATGTGCTTCAACTTGCAATCCCGTAATGAAAAGTAGATAGCGGCATTCAATTTTTTGTCTTTAGATTTTTTTGTTCTACTATCTTGTATTATCCCATCTTGTTTATCCTAGCTNTTCAGGTGTGAATGTGATTATAACTAGAGCTCATGAGTTCAGCAGGCAT…
GmaAffx.34785.25.A1_s_at	AW152939	At2g16600	7e-06	Protein Destination & Storage			TGGCCAGATTGTAGAGAAGTGAGTCTTGATACAACGATGTTTCGAGACATGTTTGTTGCTATTCAATGCAAATCACTAGTATTATAATAAGTGATTTGTGTAACTAGGAGTCAATTGTCCAGTATTAATGTAACTCTCAAATTTGTACTCCTAAATCTGCTTTTACATTTGTTCCANNNNAAAATGCGTAGCTGTCTGTAGTTGGTCAGAGATTACGTTGATAGAATTGTGGAAGCAATAGGCTCGAATATCTGTAGT
GmaAffx.35130.1.S1_at	AW734852	At2g30110	4e-74	Protein Destination & Storage			GGGCTTGAATGCTTACAGTATTTCTTNTGGGAGTTGCCTGCTCTATAATAGCATGTTCCCTCGGCATAAAGATCGAATGGACAAAAAGGTTGCAGATCTGGCAAGGGAAGTAGCCAAGTTTGAAATTCTTGCGTACCGTCGCCATTTGGACGTTGTTGTGGNANNNNNNNNNNANNAGNNNNANNNNNTNNNNAGTAAATTTTGNTTNGCTTTGTTTAATTGANNNGTTTCATCATGCATGGATGCAACTCTTNCATTATTTTAGTTCCTATTTCCTGAGAGTTGTGTTTCAGAATCTTAGTGGAGCTAGCTTNCATTCTTTCATGCAAGTNCTACACTTGGATGTAAGGTAGCTATCATATCATCTCATTTTATTGATTGTAAAGCTTATCATCCTTG…
GmaAffx.70006.2.A1_at	BI471571	At4g13830	0.0007	Protein Destination & Storage			CCAAGGCTTAGAGAACAGTATGATAGTGAATTGGGTTTGAGAAGCGAAGTGATGAGTGTTAGTAGTGATCATGAGAGGTGGAGAAGTGTGAGTGTTAGTAGTGAACATGAGAGATGGGAAAGTAGGTTTCAGGAGCAAGTGATTGAGTTGAAGACAAGGTCTCGTAGACGTATGGGACAAAAGGGTGGATCATCGGGTAGCAGAATGAGGGCACCAAACATGAGAGACAGGAATTAATTTTCTTTGAGTCATGTATTTTTGTTGATATAGANTGATTCTTTCATGTATTTAACTATATAAACTCTACATAGCCAATTCAGT
GmaAffx.66982.1.S1_at	BI970847	At1g54400	7e-09	Protein Destination & Storage			GAGAAAGGCTTGTGGATGCATCCAATGATAAATGGAGCCGTTTCCGTAAAGAAATTAAAATTTCAAAAGGATGTAATATGAATTCAATCCGTGCAAAGTTTTCCCATGGGGTTCTTTTCATTGCAATGCCTAAAGAAGCAGTCATGGAGAAACATTTAATTTGGGGGGTAGAAACAAGAAAGAGAATATCACCCACTAAAGTTGCAATTGGAGTGGTCTTCGTGGTGGCACTTGGGACTTATATAGCTCGAATAGTAAGTAGTGATGCAATAAGAAAGTTGATTAAGTACTAGACCACAAAAACTACAATGAGGTGGGGTTAAAATCAGGATATGGTCTATGCTAATAATAATGCATAGGATTGCATGCTTTCAGAATGTTTT
GmaAffx.5376.10.S1_at	BU082924	At2g18600	2e-19	Protein Destination & Storage			GAGAAACAGGCCAAGTTCTTAAGACCACCAAGCTTCAAAAAGCCAAACAAGTGGAATGTTATTGTAACATGTGCTTTAATTGAATGTTAACGTATGCCCCGTATTT
GmaAffx.56409.1.S1_at	BU965321	At1g08750	1e-37	Protein Destination & Storage			TGTTGATGTCAACCGCATATTACAGAATGGATCTATACCAATGCCATTTAGAGGAGGTACCTGTGACAAACTTCTTTGGTTCTGTAATGAAGACGATACATACTGATTCAGCCTACAGATCCCGGTCAAATAAAAAAATCGGGGCAGCAAAAACCAAAATGTCTCCGGATGAATCAATATCTGACAGTGACTCAGATGAGGAGGATCAGTTTAATAATTTAACTGCTGAGAAATATCTCCAGTATAGTGTTGGACAACTATGGAGTGTTATTCTCAGCAATGCGAATACTTTTGAAAGCATCNATAGTTTGGTGTGCTATGGACTGCTTTTAATGCTTCCTTTGTTGATATTTTCCACATGGCTATCAAAGTATGATTGGGGAAACATTCCATAATTTT…
GmaAffx.91356.1.S1_s_at	CF807081	At4g38630	8e-15	Protein Destination & Storage			GCAAGCTCACAACATGCAACAATGACTGAGCGTGCCGGTGCAGCAACATCTGAAGCTGAGAATAAGACAAGTGATTTGATGGATGATGAGAATGCCCTACTACAGCAGGCACTTGCAATGTCAATGGATGATTCTGCAATTAGCCATGATGTAAAAGATACAGATATGTCTGAAGCATCTGCAAGTGATCCTGACTTGGCTCTGGCACTTCAATTGTCAATAACAGATAGTGCAAAGGATCAATCAAGCCAGTCAGACATGAGCAAATTGTTAGCTGATCAATCCTTTGTATCTTCTATCCTTGCATCGCTTCCTGGGGTTGACCCAAATGACCCTTCTGTCAAGGATTTGCTGGCGTCCATGCAAAATCAGTCTGAGCCTCAACAGAAGAATGACGAC…
GmaAffx.90480.1.A1_at	CF806205	At1g20200	8e-39	Protein Destination & Storage			AAATGAGCCACAGTCAGCCTTCAATTCTCGGATTGCTTTCTGTCTTAACATGCACAATGAGGCGGTTCGAGCTCTTCGTTTTCCACCAAACACACACAAAGAGAAGGAAAGTGCTGAAAAGAGAAGAGAGAGNCAACAGCAAGAGCAAGAGCTGGCTAAGCATATTGCAGAGGAGGATGACGATGATTTTTGATAATTGTCTTATTTCACCCTATGAATTGCTATGAGGATACCTTCGTTTCCAACCTTTGCTCATCTTTTCCTTTTGAAGAATTTCCATTATTATTTCCTTTTCAAAAGGTGAATTTTTCATTTTCTAAGTGGAAGATCTCTGAAAGTCAGTTTAACATATCGAAAGATTTACTATTTATTTCCATCCATGATGACTGCTATGGTTTG…
GmaAffx.92623.1.A1_at	CF808348	At2g39940	6e-34	Protein Destination & Storage			GTTTCTATGTTCCTGCTCTATTTGTAGTTCATTTTAGACAATTAGTCTTGTAATAAGCCTGTGTTTTCATTTGAAATTCTGAAACGCTTCCCCTAACGCTATTGGCTCCCTTAAAAACTGAA
GmaAffx.92634.1.A1_x_at	CF809148	At1g63800	1e-79	Protein Destination & Storage			AGAGTTGAGTTACCGGATGCTTATCCTTACAAATCTCCTTCCATTGGCTTTATCAACAAGATCTATCACCCAAATGTTGATGAGATGTCAGGATCAGTTTGTCTGGATGTTATCAATCAAACCTGGAGTCCCATGTTTGATCTTGTTAATGTGTTTGAGGTGTTTCTACCTCAACTTNTGCTGTATCCCAATCCATCAGACCCCTTGAATGGAGAAGCTGCAGCTTTAATGATGCGTGATCGACCAAGTTATGAACAAAGGGTTAAAGAGTACTGTGAAAAGTATGCTAAACCTGAAGACATAGGGGAAGCCACAGAAGAGAAATCCAGCGATGAGGAGATGAGTGAAGATGAATATGACTCTAGTGATGAACAGGTTGTTGGTAAAGCAGACCCCTAG…
GmaAffx.92697.1.S1_x_at	CF808422	At5g52650	8e-14	Protein Synthesis			GCTACCATGATCATTCCTGAGAAGAACCGCAAGGAGATCTGCAAATACCTCTTCCAAGAGGGAGTTTGCTTTGCGAAGAAGGACTTC
GmaAffx.92746.1.A1_at	CF808471	At5g02450	3e-42	Protein Synthesis			CCTTTTTCAAGGGAACTTTGCATCTTATTAGTATCCTGAGGGTAATATTTCATTGAATCCCAAGGGTTAGTTATATTGCAAGCTGTGATGCTTTTGCATGCCTTATTGGTCAAAACCAAATGAGTTATATGGGATGTGTTTATTTTTGGTGTCGCCAGGAAGGGATGTGTTTATTTTGTAAGAGCTATGTTATTTGGACGTTTTATTTTTTTATAACAAACTTAAAAGAGAAAGAGAGGATTGATAGATGCGATAGAAC
GmaAffx.90388.1.S1_at	CF806113	At5g35530	2e-55	Protein Synthesis			GTTGAGGGCTCAGAGAGCCAAATCCATGAAATTCAAGGATGGGTACATGATCTCTTCTGGACAACCAGTCAAGGATTACATTGACTCTGCAGTGAGACATGTCCTCCTAAGACAGGGTGTTCTTGGTATCAAGGTTAAGATCATGCTTGATTGGGATCCTAAAGGGAAACAGGGTCCTAAAACTCCCCTTCCTGATCTTGTCACAATCCACACTCCTAAGGAAGAGGAAGAATATGCCCGTCCTGCTGCTGTTTTGGCAACCGATATTGAGGTCCCTGTTGCTTCTTAAGTAGAAATCATAGCACCTGAGTACCTAGTATGCAGTGTTCATTGGCTTAGACGTGGTCAGATTTTTGTAGTGTCTTGTCTTTTCAAGAATTTTTATACTCCAGTACAAGG…
GmaAffx.91658.1.S1_s_at	CF807383	At3g11400	6e-51	Protein Synthesis			GACTACTGGATCTGATATGCGGCGCAGGAATGATGAGAATTCTGTGAGGGTAACTAACCTCTCTGAGGACACGAGAGAGCCTGATTTGCTGGAGCTGTTCCGTCCTTTCGGTCCTGTCAGCAGAGTCTATGTTGCCATTGATCAGAAGACTGGCATGAGCAGAGGGTTTGGCTTTGTTAACTTTGTCAACAGGGAAGATGCACAAAGAGCTATTAACAAACTCAATGGGTATGGCTATGACAATCTCATCCTTAGAGTTGAATGGGCAACCCCAAGGGCAAATTAAATGTTGAATGTTTTTGCCTCTTTCTTTAAAACGGTATTTTGAAGGTCTTTCTATTTTTGTAGTCTGAGTCCTGTACTATCTGTTTCCTTTGAG
GmaAffx.92132.1.S1_s_at	CF807857	At1g72370	5e-94	Protein Synthesis			TCGCAGAGGGAGACGGACATCCAGATGATGCTCGCCGCCGACGTTCACCTCGGCACCAAAAACTGCGACTTTCAGATGGAACGCTACGTCTTCAAGCGCCGCACCGATGGTATTTACATAATTAACCTTGGAAAGACATGGGAGAAGCTTCAGCTTGCTGCTAGGATTATAGTCGCCATTGAGAACCCACAGGATATCATCGTTCAGTCCGCCAGGCCTTATGGCCAGAGGGCAGTTCTAAAGTTTGCTCAATACACTGGAGCTCATGCAATTGCAGGAAGGCACACTCCCGGAACATTCACTAATCAGATGCAGCAATCCTACAATGAGCCTCGTCTTCTGATTCTAACTGATCCAAGAACAGATCATCAGCCTATCAAGGAAGGTGCTCTTGGAAAT…
GmaAffx.93281.1.S1_s_at	CF809006	At1g09690	2e-81	Protein Synthesis			CAAAAATGCCGGCTGGTCACGGTTTGAGATCCCGCACCAGAGATTCCTTCTCTCGTCCCTTCAGGAAGAAGGGTACCATCGCCCTCACCACATACCTCAGAACCTACCACGTCGGCGATTATGTCGACGTCAAGGTTAACGGCGCCGTCCACAAGGGAATGCCTCACAAGTTCTACCATGGCCGCACCGGTCGCGTCTGGAATGTCACCAAACGTGCTGTTGGGGTCGAAGTCAACAAGCAGGTCGGCAACAGAATCATAAGGAAGAGGATTCACGTGCGTGTGGAGCATGTTATGCCATCAAGGTGCACTGAGGAGTTCCGCCTTAGGAAGATCAAGAATGATCAGCTCAAGGCTGAGGCCAAGGCCAAGGGTGAGAAGATCAGCACCAAGAGACAGC…
GmaAffx.99.1.S1_s_at	BI942859	AtCg00800	1e-102	Protein Synthesis			AAAAGAGTAAATATTCGCCCGCGATAATTTTGATTTTATTGAATTTTTTTTTTATTTTTGCCAATTCTATTTATTCTTTCTAATAATAAAAAATATTCTAATAACTAATAATAAAAAGGAAAATAAAGATTCATTAGAATATTATAAAATAACAAATAATAGAACAAAACAAGATTCTTTAGTTATATATGTAAAAAAAAAATGGTTTATTTATAAGAATACATATTCCATTCTATATCAAAACAAAATATAAAAATTTGGAATAGATTCTATGAAATCTCAAAAAATCCCGCTATTCAATTATTCATTAAACATATGAATATTAGTGCATATTATTTTATCGATTAGATTAAATAGATTATCTATATATATAGATAGATATCTATTTGAATTGCTTCA…
GmaAffx.89901.1.S1_at	CF805626	At1g13950	2e-72	Protein Synthesis			CATCGGTCCCAAAAATTAATATGATGCTATGGCTGTAGCTATAGCTGATAGCACGCTTTTTCTTCTT
GmaAffx.90084.1.S1_at	CF805809		2e-09	Protein Synthesis			GGCTGTTCCAGCTCCAGTTCCAGCTCCACAAGCTGGTGTGCCTCCAGCCCAAGCTTTTCCTCCCGCTACTGGCTGGGACTAGCTTTTGACAAGAGAGTTTGATTCCATGGTGTCAAAACCATAATTTTTCTTCCCCTCGGCTCAGAAATTTCCCTTTCGAGATTTAT
GmaAffx.84363.1.S1_at	BQ742685	At4g25720	4e-63	Protein Synthesis			TATTTGTGACTGGAAAACTGTGGCCAAAGCTGTATGAAATCAAGGTTTCTCCAGTAAACAAACCAATTGAAGAAGGGATCATTGAGCAGCTTTGTTTGCGTAACCCTTTCAAATTTCCATGATTGATTTTTTCTGTTCCTGCTCTAATTTCTTAAANNNNNNNGNNNNNGCGCAGCTGAACTGAGTTTTTGGCATGGTATTATGACATGATCATTTTGAGAAGATATTCAGTTGGTAGAATGCTACCTACCCTATGATGCCCTATGATGCCCTCTATGATGCCCTACCCTTTATAGTATCATTCTTCTGTAGCAGGTCAAGAATTTTAATTAATTAAATACACTAAGGGAGAGATCAATCAATCTTTTTTGTATGATGATGGTTGATTTTGTAAGTAAC…
GmaAffx.5910.1.A1_at	CA938005	AtCg00650	9e-28	Protein Synthesis			ACGCCTACGAAAAGATCGCTTGGATTTCATAAAGAGTCGCTTAGATTTTTCCATGGTTTATTTATCCCTATTCCAAAAATCACATTTATTACAAGAAATACTATAAAGGATTTGTTTTTTTATTCTGACTTTTTTAATATATGTTGTTATTTTTTTAATATATGTTGTTATATACTGATATTTGTATATATTCAACTGTAAATGATAGAATACAGATAGATCTATCTATATAGATAAGAAAAATAGATCATTTTACATGTTAAGTTCTTTGGTTCGAAGGGTAACACACAAGCGATCAATTTGATCTATTTCTTTATTTCTGCGTGAATTGTATGTTTGCAACAACGGGGACAAAATTTTCTCAATTCCAATCGACTAGGCGTATTCTGTCGATTCTTT…
GmaAffx.51287.1.S1_at	BQ613122	At4g20980	1e-122	Protein Synthesis			GAAAGATCCATCTAAGCCCCAGGTTAGGATTTACGAGGTTCCTGCGGATGCTTTTGAAAATGACTACGTGGAGGAGCCACTTCCGGAGGATGAACAAGTTCAGCCTCCATCAGAGGGTGCTGAGGGGGGAGAGGCAACTACTACANCTNNTGNCGNGGAAGATAAGCAGATAGATGGTCAAGCTTAAAAAGGTCATTTTTTTATTGGAGTTGATGGCCGTTCATTTGGAAAAAAAGATCGTACTCGGATAAATTTTCTTTAACACTGCTTATTTGTCGGCCAAAATTTTGCAATATGTGATGTTCCTTTTGGACCAAAAGTTTAAAGCAAAACTTCTTAGTGTTTTTTTTCTATGCTACAGCTGTTTATGATTTACAGACCTTAGCATATTTAAGTGGA…
GmaAffx.5291.1.S1_at	AW569952	AtCg00830	1e-19	Protein Synthesis			ATTGTTTCAAGCACCGACAGAACCGGAAGCACCCTTTGTTTCAAAGTTTCAAAGAGGGGAGGACGGGTTATTCACATTTCATTTGATGGTCAGAGGCGAATTGAAAGCTAAGCTGTGGTAATTCTAAGGATTCCCCCCGGGAAAAATAGAGATGTCTCCTACGTTACCCGTACCATGTGGAAGTAGCGACGTAATTTCATAGAGTCATTCAGTCTGAATGCTACATGAAGAACATAAGCCAGATGAAGGAACGGGAAGACCTAGGATGTAGAAGATCATAACATGAGTGATTCGGCAGATTTGGATTCCTATATACCCACTCGTGCGGTACTTCATTGTATGATCTATATCTATATATCTATATCTATNTATCTATCTATAGATATATAGATATATAAG…
GmaAffx.74019.1.S1_s_at	BQ080599	At2g33800	4e-13	Protein Synthesis			CCTCCGACGACATTGACACATCGTTCTTCGACAACATCAACCCGCAAGACGACATCACATTCAA
GmaAffx.75978.3.S1_s_at	CA937876	At1g36730	1e-69	Protein Synthesis			ATATGTCCAGTGTTATGGTTGTGGAAATCCTGAAACTGAGATCATAATNACTAAGAANCAAATGATCCAGCTGAAATGCGCNGCTTGTGGTTTTNTGTCTGATGTTGATATGAGAGACAAGCTGACTACCTTCATCATTAAGAACCCTCCAGAAGTTAAG
GmaAffx.8247.2.S1_at	BU550218	At5g57870	2e-56	Protein Synthesis			TTAGATCTGCATCCGAGCAAGCCATTTTGGATGCACAAACTTCTGATATTGAGGTCTGCCAGAGTCAGCTCAAGTGAATCAAAATTTCTGTAACTGGACGAACCTGTCTTCCTTTGCTGCTTTAAATTTCCATATCTTCATCATCACTTTTAGAGTAAAAGCATTTTGTATTGAAGTATGTTATAAAGTGAAGATTCCAGTTTCAGGTATTTTTCTCAAGCTGTAAAATTTTNTTTTNNNNTNTTTGAGATTGTTTGAGGGAAAAGTCAAACCATAAAGCTACGGATTTTATTTTCCGGTAAGCTAGGTGCCAAGTTTCTCCGAAGGTGTCCCAATAGGGGTCCAATGTTTTTGTATTACATTAGTTTCAATTTACTTATGTTTCTTGACATGGTAGTT…
GmaAffx.81459.1.S1_at	BF596892	At3g49910	2e-11	Protein Synthesis			GCTGTGATTGCATTTTTGTTTCAATAATTTCTAATTCTCTATCTTGTCGCAGCTACGGATTGTCTTTTAT
GmaAffx.31199.1.S1_at	BE821767	At5g26710	3e-67	Protein Synthesis			GCTTGACCTTGCTGATGCAGTGTCTTTATCAGCAGGCGAGGAAGTAACATTGATGGATTGGGGAAATGCCATAGTGAAGGAAATAGAGAAGGACCAAGATGGAAATATCACAGGGTTGAGTGGTGTTTTGCATCTTGAAGGATCTGTGAAGACCACAAAATTGAAACTCACTTGGCTACCTGAGATAGATGAACTAGTTAGCCTGACATTAGTGGAGTTTGATTATCTAATTACAAAGAAAAAGCTTGAAGAAGGGGAGGATTTCATTGATGTGGTTAACCCATGTACCAAAAAGGAGACTTTAGCNTATGGAGACTCCAACATGCGAAATCTTCAGCGTGGAGATNTATTGCAACTGGAGAGAAAGGGATATTTCAGGTGTGATTTACCCTTCATTCG…
GmaAffx.10709.1.S1_at	BE657216	At5g35620	1e-59	Protein Synthesis			GGACAAACTTTCGTTGTGGACAAAGACAGCNGCAAATGANGCTGCCCAGATGAGCATTGGAAGGAAGTGGAAGGAAATCATNGATGTTAACGACAAGATAACATACAACTTTCATGATGATTCTAGAANCAAAGGAGCANCAAAGGGTCGNTACACCGTATAAACACCNCNNGAGCATCTTCTTGCACTTGTGCTGGGCTGCTGGCAANGCTGTANTATTTGATATCTTNATCATGTGCCATATGTACTAANGANCATNCTACTACTTTGGTGGNNGGGTTAGTTTTATTTTTGTTCACTCANCCCACTTTTGGGTGTTGATACTATCATACTCTTCTCATTTTTGNAAATGGNCTGTCAAATTTTTCTTNNGAGTTCATTNGTAGTTTTTTTNNNNGT…
Gma.973.1.S1_a_at	CD391361	At3g13580	1e-109	Protein Synthesis			GGAAGCATGGGATCATTTGCGTTGAAGATCTGATCCATGAGATCATGACTGTTGGACCTCACTTCAAGGAGGCCAACAATTTTCTGTGGCCTTTNAAGCTCAAAGCTCCCCTGGGTGGTCTGGAGAAGAAAAGAAATCATTATGTTGAAGGAGGTGATGCTGGCAACAGGGAGGATTACATAAATGAGCTTATT
Gma.802.1.S1_x_at	CD398369	At3g56340	3e-33	Protein Synthesis			TGTCCTAAGGACAAGGCTATCAAGAGGTTTCTGGTGAGGAACATTGTTGAACAGGCTGCAGTCAGAGATGTTCAGGAGGCTTGTGTCTATGAACAATACACGCTTCCGAAGCTTTATGTGAAGATGCAGTATTGTGTTTCCTGTGCTATCCACTCTCATGTTGTGAGGGTTCGATCCCGCACTGATAGGAGAAAGCGTGAGCCTCCACAGCGATTTATCAGACGCAGGGATGATGCACCAAGGCCTGGTCAGCCTGGTCAAGCCCCACGTCCTGCTGGAGTAGGAGCTCCTGCCCGAACTTAAAAAACAAATTCCAAAGTTTTTTGGGGCTTGTTGGTTCAGTTTTATGTTACAAACTTATACTCCATTTGCTGTTTATTTTTTAAATTTCAGTTTTGT…
Gma.7261.1.A1_at	BQ612280	At4g30930	2e-06	Protein Synthesis			GAAAAGCCTCCAAAACCTGCTAAGAAAGAAAAGGAAAAAGTTGCAGTTACTGCTTAAAAAGGATGTACCTACCCCTTTGGGTGTTGATGGTTATTGCTGTCTTTTTGTCTCAGTGAGTTTTGATAGTTGGATGGTATGTAGTGAGCATGGTGATATTGTTGATAAGCTCTTCATTTTGCATCTGCAAATTCTAGGTAGGTGGAAATAGTCAACCATCCACTCAGTAGTCAGGTTTTGTAGAATTGTTACACAAATTTTCTTTTCCCTCTGTAGTGCTATAATTAGTGATTCAATGTTTGAACGGGTTTCGAGGTCTCA
Gma.7067.2.S1_at	BQ610144	At5g20290	2e-88	Protein Synthesis			AGATGTACGCTTTTTGACTGTTGGTCGATCTCCTTTAGGGTGATGCCATAGGACATCCTTAGTGTGAACGTTTTATTAGCGTACATCTTGAATTTGAGACAGGGATGCATGAGTATTCTACTTGTCATTACCATATCATCAGATAAGAGAACAAAACTGCGCTGATTTTGAAATTACTG
Gma.6612.1.S1_at	BE823287	At3g61110	2e-37	Protein Synthesis			TTGTTCAATCACCAAATTCGTTCTTCATGGATGTCAAGTGCCAGGGCTGCTTCAACATAACAACTGTGTTTAGCCACTCCCAGACAGTTGTAGTATGTGGTAACTGCCAGACTGTGTTGTGCCAACCAACGGGTGGACGGGCGAGGTTAACCGAAGGGTGCTCTTTTAGGAAGAAGGGAGATTGAATGGTGTAGTATAGTAGTAACCAGACTTTTTCTTTGTCCATGATTGAAGAGTTTTG
Gma.6129.2.S1_at	AW186006	At1g13950	5e-72	Protein Synthesis			ACCATGTCAGACGAGGAGCACCACTTCGAGTCAAAGGCTGATGCTGGAGCATCAAAGACATTTCCCCAGCAAGCTGGAACCATCCGCAAAAACGGTTACATTGTCATCAAGAACAGGCCATGCAAGGTTGTGGAGGTTT
Gma.5601.1.S1_at	AI965923	At5g20160	2e-51	Protein Synthesis			GACACTGAGCCTCTTGAGATTCTTCTCCATCTTCCTCTCCTNGCTGAGGATAAGAATGTTCCCTATGTATTCGTNCCATCAAANCAAGCNCTTGGGCGAGCATGTGGAGTCACACGGCCAGTGATTGCATGTTCTGTAACAACTAATGAAGGAAGTCAACTNAAATCCCAAATTCAGCAACTAAAGGATGCTATTGAGAAGCTGTTAATTTGAAANTTTGATATTCGGTATGACGGGCTTCTTGAGNNNNNNNNNNNNNNNNNNNNNAGGCTTTGACTGGACCAGATGTTGTATTCAACAGACAAAGGTGTTTTATGTGTAAACCTACATTTATATTTACTTTTGCCGCGAAGGATT
Gma.5843.2.S1_at	BE824014	At3g12390	5e-67	Protein Synthesis			AGCAATGTTGGATCAAAGCCTGAATCTTCTGCTGTTGCTCAAGATGATGAGGAAGTGGATGAGGCTGGTGTAGATCCCAAGGACATAGAGTTGGTGATGACTCAAGCTGGCGTGTCAAGACCTAAAGCCGTTAAAGCTCTCAAGGCGGCCGGTGGTGACATTGTTGCTGCCATTATGGAGTTAACTAATTAATTGTCTGGTTTGTCTGAATTTTAGAATGTGTAGCTATTTTTCTTTGTTGATTGAAATTTTTGTTTTCCTTGAATTTGAAATACTGGTTTCAGTGGTTTGTCAATTGTCTGTAATTGTTTGCACGGAAAGAAAAAGACTGT
Gma.5098.2.S1_at	BI699341	At3g20390	3e-61	Protein Synthesis			GCATAGCAACTTTATAAGCATCAATTGTACTAGTACATCTGGCTCCATCAGCAAACTCAGGTTAANAATGCAGGAAGGGACATATCTTAGTATTGAAGTTTTACTTGTTTTGTTCTTTGGATAATGGTGCTCTTGTGATTACATTTACCATCCTAGCGANNGTCATTGGATGTTTCTTGTTTGCAGCTTTTGTGACATCGTATATTCGTATCACATAAGACATATTATGAATAAGATCATTTTTAANNAATATCTTTTACTCGAACTCACATCAATTTTCT
Gma.3910.1.S1_at	CD392610	At4g31985	4e-23	Protein Synthesis			TAGCTTTGGTCATGTGGTTACACAGAATGATCACTGTAGAGCGTTTCCATAACCCTATTTTATTATTCTATTTTTTTGGCTATTAATGTGAAACTGTGATGGTAGTTTTTATTTNACTGCCTTTGATTNNTANNNTGCTTCCTTTTTCTTTCTATTTTTAAAACGCAATTTCATTGGAATGTTGAATGGTGTTGTTCTCCACTGCTTGATAGTTAGTTGGTTGCAGAGGTGACATGTGAAAAA
Gma.4834.1.S1_at	CD412218	At5g09770	2e-67	Protein Synthesis			AAAGAGATCAGAAGACTCGCGGATAATATGGTGCAGCTTGGAAAGGAGGGATCCCAACATGCTGCNAGACNNGCTGCTAGTTTTGTGCGAGGAGATGATGTCNTTCACAAGNTGTTTACAGAACTNGCTTATCGGTACAAGGATAGAGCTGGAGGATACACCAGATTGCTTCGGACCCGTATTCGAGTGGGTGATGCTGCACCGATGGCCTATATTGAGTTTATTGACAGAGAAAATGAGCTTAGGCAGGCAAAGGCACCAACTCCTCNAGCCACCACAGAGAGCACCCCTTGATCCCTGGGCACGTTCTCGTCTCAGCAGGCAATTT
Gma.2135.1.S1_a_at	BE660424	At1g13020	4e-69	Protein Synthesis			GTGGATTTTACAGACAGACCTCGATCTCGTGGTACAGGAGATATGTGGATGCNTCCTAGTGATGACAGAAGACAGTTTCAAGGTNNNAGCAGGGAAAGGGGATGGTTTTCTNNNNGCNGNAGANNNNAATAGGTCAACGTCAAGAGAGAGATGGTGAACAGCAGTTTTGTGTGGATTAAGAGTTATCTTCAACTTTTGATGACCAGAACCTAATACTACTATTTTATTACTTGTCTTTTCTAATCGTTTTGTTCATTTTACTCCAGGCAATTGGAGCAACAATCATTGAGTACTGGCACTAAAACTTTTGCCTAATCTGTTATTGCATCTCGAAACATTGTAAATTTGTTTTTCCCCTTCTGGTAATTTTTTGGGTGTCTG
Gma.1859.1.A1_s_at	CD395292	At2g44860	9e-29	Protein Synthesis			GCTCCTTCTGTGCTTCAACAGGATCCATCTCTCACTTTACCAAAGATCAAAGTCAAGGTTTCCCAACAGCAATCAGAGGAGAATCATGCCATGGAAGAGTAATTCTAACAATGCTGCACTTAATTTTTGCTATTTTAATATTTGTTGCTAAATTAGTTGCCTGTAAGGTCCAGTTTACCAGTT
Gma.17941.1.S1_at	AW704049	At3g52580	1e-55	Protein Synthesis			GAAGGCTTTAAGGTTCTCGTGGTATTTTAATTTCCATGTCAAACAGAATTGTGGCATTTTGAAATTTTGCTTAAGTTAATATAAGAACTTCTATTGTATTTCTTGAGGTTTTGAACAGAATTTAGTTGGTACATTTAGGCATTATNNNNANANANNNTTGAAAGTTTTGCATGTTGCTTCGTGGCTTGGAAANNANNNNANNANNNNANANAANNNNNNNNNNNNNANANAANNNNNCANNNCNCNTGNTGGAGATAAGTCACGTGTCTTGTTGACTTGAGATAAGGTGTTTTATTATTTTAAAATTCGATTACCGTGAGATATTTTTGTTACTGGCCATGCGTAACTGTAGCGATTGGCAAAAATTTTGTNTTAGAATGTGTCATCATAAAGAGTTCC…
Gma.2819.1.S1_at	BE821662	At1g72550	1e-141	Protein Synthesis			ATATTGGCACTTTTGGCATTGTTCATCCNGAGGTATTAAACAACTTTGACATTCCCGATCCCTGCTCCTTTGNTTGAACTTAACATCGAAAGTTTCCTATAAAGATCTGTATCAGTTGGTAACCCCATTTGTCCCATTCGCCCTTTTGAATATATTTATTCATCAAACTGGGGAATCAAGATGTTCAACTGCTTGAGTGACTATATAGGAATCAAAACACTTCGTGGAACTTAGAACTACACTAGCTCGGGACCGGAATGTTACTAATATGCCCTAAATTAGAGTGTTTAGTTAATTATATACCTGTATCATTTTCCTAAGTTTCTCTCCGTTGTTAAATGTTTAGANCATCATAAGCTACGAATTGGTTAGTAGGGATAATCTCGACCATAAATT
Gma.3130.2.S1_a_at	BE329764	At3g04240	2e-35	Protein Synthesis	Protein Modification		GACTGAGAGCATATGCTGCTGCACAAGGGGTACAACCGGATCAAATTATTTTCACAGATGTTGCCACGAAGAATGAACACATCAGAAGAAGTTCTTTAGCANACTTATTCCTTGACTCGTAATTACTGACCTGTATTTTNNNNATTTGTNTCTTNATTTTCCTGTTCGCANNCANTTGGCCCTCTCCCCNNNNCTNNTCNNCTTNCANTTGTTNNCTTATATAGTTTTTCTTCGTNTTATGTGCGTGGACTTTGTTTTCTTNTAGGCCTTTATGCAATGCACATACAACAGGAACAGATATACTATGGGCAGGTTTGCCAATGGTTACTCTGCCTCTTGANAAAATGGCTACTAGGGTTGCTGGGTCACTCTGTCTTGCCACTGGACTAGGGGAGGAGA…
Gma.3210.1.S1_s_at	AW101980	At5g56680	0	Protein Synthesis			GATGACTTAAAGACAGTGGCTGCTATGGATGTGCTTGTACCCAAGGTTGGAGAGCTAATTGGTGGAAGCCAAAGGGAAGAACGTTATGATGTCATCCAGACAAGAATAAAGGAGATGGGTTTGCCTGTTGAGCCATATGAGTGGTACCTTGATCTGAGGCGGTATGGAACAGTGAAACATGCCGGATTTGGCCTTGGCTTTGAAAGGATGATTCTCTTTGCCACTGGCCTGGAAAATATTAGAGATGTGATTCCCTTCCCACGATATCCTGGCAGAGCAGATCTATGATTACAAGTGGTTTTTACGAATCTATTGCACCAAG
Gma.11219.3.A1_s_at	BQ741865	At1g15930	6e-24	Protein Synthesis			AAACCCAAGGTAGATATAATCCAGCCACAAGGCAAAATTCATTCTCAAGGAATAACCCAAAATGAAAATGTGAAGTGCATAAAATCTATGAATCTTGCAAATCATTGAGATTTCACATGCTGCAGAACGACGTTATAGGCTTCATGCTCCTCACCGAAATCCTTCACAACCACACAGGAGCAACCAGTAACCTTCCTTGCTTTTCCTTCGGAATCAATCTTGCACAAACCAGCCCATTCTCCAAGGGTCTTTGCACTCGGAACTGTCAG
Gma.1067.1.S1_at	AW350176	At4g31180	1e-58	Protein Synthesis			ATTGCTCAAATATTGAGTCTTTTCAATTTTCATTATATGACAAGATTTTATTTTTTTATGTTGAATCCCGAAAACATTATTTAAATTCTCAGTCTTGGAGCTGATACTTA
Gma.10688.1.S1_at	CD405473	At3g09630	0	Protein Synthesis			CCCAGGCCCAAGATGGTTAACTCTGATCTTGCCAGGATTATTAATTCTGACGAGGTTCAGTCTGTTGTGAGGCCCATTAAGAAGGATGTGAAGAAGGCCACGCTGAAGAAGAACCCTCTTAAGAACCTGAACTCTATGCTGAAGCTGAATCCTTATGCCAAGACTGCTAAGAGGATGGCTCTTCTTGCTGAAGCTCAGCGCGTTAAGGCCAAGAAGGAGAAGCTCGACAAGAAGAGGAAGACTGTCTCTAAGGAGGAAGCTTCTGCCATCAAGTCTGCTGGGAAAGCATGGTATCACACTATGGTGTCAGATTCTGATTATACAGAATTCGACAACTTTTCTAAGTGGCTGGGTGTTTCACAGTAAACTTTATGATTCATATTTTCGTATTAGATTTTT…
Gma.10332.1.S1_at	CD418667	At2g33840	1e-106	Protein Synthesis			ATCTTGTCTTACCTTGGTTTAATGAGTTCACAGTGGAGCGTAGTGCAGATAATGGTGGGAATAAGACTTTCACAAGCTTTGCTGAGCTGACTGCAGCCTATNAAAGTGGAGAGTTACATCCTGGTGACCTTAAACCAGCATTGGCAAAGTCNTTGAATAAAATTCTGGAGCCTGTNAGGGAACACTTTAGGAAGGACAGCAATGCTAAAGAGCTANTGAAAAGGGTCAAGGCTTACAGAGTCANNNANTAATATGCTNNTTAANGACTTCAGGCTAATNTCTATTCTTTGCCAANCAGNCNTNNNNNTTTCACGTTNNGAGATTATNCACTTNTGGACTTNTAAAATGTGGCGGAGGTTNTCTTTAGAATGAGTAATGTGATTTTTGTTTGCGTATTTT…
Gma.1330.2.S1_at	CD402064	At5g17870	7e-15	Protein Synthesis			CGATAGTGTGTTCGTCTAGGCCGCAGAAGAAAGCGACGGCGCATCACATGAAGACTCGGCCTCGGAAGACGCAGGCATGGGATAGAAACCGCAAGCCCACCGTCTACGATCCACTCCCTCCTCTTCCTCCTGATTGGACCCTCGTTATTCCCGCTGACGCTTCTTCTGCTCCCGTTACGCCTCCGCCTCCAACTCCCTCTGCCTAGTCACTCTCTCGGTACTCTCTCTCGTTTTCATGTAGTCTTATCTTTAATTCCAGCAGCTTTTCTTTCATGTTTTCATCTCAAATCAAACCTTCATCAT
Gma.13008.1.S1_at	CD411438	At3g47370	7e-60	Protein Synthesis			ATCTCGAGAAAGTGTGCGCCGACCTTGTTCGTGGTGCCAAGGACAAGCGCCTCAGGGTGAAGGGACCTGTTAGGATGCCAACTAAAGTACTTAACATCACCACCAGGAAATCCCCGTGTGGTGAAGGCACCAACACATGGGACAGATTTGAGCTGCGTGTGCACAAGAGAATTATTGATCTCTACAGTTCCCCTGATGTGGTTAAGCAGATTACTTCAATCACAATTGAACCGGGTGTTGAGGTCGAGGTCACCATTGCAGATGCTTGATTTTTGCCCCATTTTTTCCCCGCATGCTAGTTTCTTTTNGTAATTTATCCTTTTTGCTAGGTATGTTGAGTCCCATATGTTAGGGTTAATGCATTTCCTTNTNGCCGTTAAAATTTTTGATGTTGATTAT…
Gma.11190.1.S1_x_at	CD402535	At5g35530	1e-106	Protein Synthesis			CGGTGCCAAAGGATGCGAGGTCATTGTTAGTGGAAAACTGAGAGCTCAGAGAGCCAAGTCCATGAAATTCAAGGATGGATATATGATTTCTTCTGGACAACCAGTCAAGGATTACATTGACTCTGCAGTGAGACATGTGCTACTAAGACAGGGTGTTCTTGGTATCAAGGTTAAGATCATGCTTGATTGGGATCCTAAAGGGAAACAGGGTCCTAAAACTCCCCTTCCTGATCTTGTCACGATCCACACCCCCAAGGAAGAGGAAGAATATGCCCGGCCTGCTGCTGTTTTGGCAACTGATATTGAGGTCCCTGTTGCTTGAAAATGTTTTATTTGTTCTTGAGTAGAAATTCATAGCACCTGAGTACCTAGTATGCAGTGTTCATTTGCTTAGACCTG…
Gma.12170.1.A1_at	BE657308	At1g61580	6e-34	Protein Synthesis			CACCTCGTCCAAGTTTGGACATGGCCGCTTCCAGACCACTCAGGAGAAACNAAAGTTTTATGGTCGCTTGAAGGCATAAATTTTTGTTTTGGAGACAACTTGTGATGAAAATTTTGTTGCAAAATAAGACATTTAGTGGTCTTTTTTTTTATTTGAGTCCGACCTATTCTCAGAGTTGTTTCTTTTAGTTG
Gma.17555.2.S1_at	BE820725	At4g18100	2e-25	Protein Synthesis			TTAACATGGTCTTTTACCCCTCACTTGCCGTCTCAAATTCGGTTTTAAGTGTTGTAGTTCCTCAATTTTTTCAGATCTCAATTTTTAGTCCGTCGAAACTTTTTTTAACAAATTTTATTCTTATGTTAATTCTCCATCAGCATTTTTGGGAATTAAAAATTAGAATGTGAAAAAGTTGAAGCATAGCGATAGTTTTTTTTTTTTGGATACTATAAACATGCGATAGTTGCTTGAAGAATACCAGAAATCATTGTATAGGTTAACGCCAACCATGTTGTGGAACGC
Gma.17616.1.S1_at	AW568275	At5g60390	0	Protein Synthesis			AATGAATTGTGCTGGATGGTTTATCAAGGAAACTCTATTATTATGACTACAATAAATGGTTTCTTGTTCGTAGTACTTCATTTTTTCGTGTAGGGAACTTGTTTATCAGATTTTGTGTCAGGTTTGCTCCGTCATCTCGCAACTTTTGTTCCCAGAACTGGGTTCTTGATCGACGGTGGCAAGGCTATTTCTTTTTCATTGTTATGCTTTGTTTCTATTACAATGTGTCTCTGT
Gma.1742.1.A1_at	BI967509	At3g58140	2e-93	Protein Synthesis			CATTTTCAAAGTATCCTCCTTGTTACAAGGACATNGNGTNTNTNGGATCANTGAATCATTNACNGAAAACNATCTGTGTGAAGTTGTTAGAGGAATAGCCGGGGATCTTGTNGAGGAGGTGCAATTAATAGACAANTTCACCAACAAGAAAGGAATGACCAGCCACTGCTATAGGATTGCATATAGGTCTATGGAACGTTCNCTCACTGATGAGGAAATAAACGATCTGCAGTNGGAAAGTAAGAGAACAGGTGCAGAGCAAATTGAATGTTGTCTTAAGATGANCTATAAATGNTGAAAATTTACAGCTTTGCTGTNTTCNATCTCANTTTTGTTAATGTATAGATGTTTTGCCTCCCTTTAGCGACTGAACAGCGCNATAGACAGATNTATTATTTA…
Gma.16937.1.S1_at	BI944977	At2g38140	2e-18	Protein Synthesis			TCCACTCTCCGTTCAATTGCACAATNCCACCTGTCACCTTTCCTTCTCTCACTCCCAAACTCTTTCCTCACCGCTCTCCACTTCCTTTCCTTCTCTCTCAGCCTCTGCAACCACCACTCTCTCCCCAACCCCTTCTGTGTACTGTGGCAGAGGGGACAGGNAAAACTGCAAAGGGAAAGCGCTTCGCTCATTCATTTGGAAATGCGAGGCCAAAGGACAAGAAGAAGGGTAGAGGGCCACTGAGGCCTTATGCTCCACCGGCACCTTCCAAAAAAGACAGGCTCGAAGATAATGAGGTGGTGAAGATTGAAATTGACGAGTCTCTCTTTTCTGGTTGATTTTGGTGGTGAATTGTAATTTTGTGTCTTCCATGGTTTAGTTGTTGATATATGATTCCAT…
Gma.16803.1.A1_at	CD404227	At2g40290	1e-58	Protein Synthesis			GGGAAATGATGACTGCCCTGTCAAAATTAAACTTGTTGCTCCCCCACTTTATGTTCTTACCACCCAGACACTGGACAAGGAGCAAGGAATATTGGTTCTCAACAATGCCATAGCTTCTTGCACTGAAGCAATAGAACAACACAAGGGTAAACTTGTGGTTAAGGAGGCAGCTAGAGCAGTGAGTGAACGTGATGATAAATTGCTTGCCGAGCACATGGCTAAGCTACGCCNAGATAATGAAGAGGTCAGTGGTGATGAAGACAGTGAGGAGGAAGAAGATACAGGAATGGGCGAGGTTGATGTGGATAATGGTGCCGGGATAACAGAGTGACNAAAAACTTGTGGGTATAGTAGTAAGGCATAGATAGCAGAGTCCGGCTTTACTAATTCTGTCTTTTG…
Gma.17229.1.A1_at	AW309443	AtCg01240	8e-14	Protein Synthesis			AAGTTCTGAATTAGTGGATGCTGCCAAAGGTAGTGGTGATGCCATATGTAAAAAGGAAGAGACTTATAGAATGGTAGAGGTAAATAGAGCTTTTGCACATTTTTGTTAATCCATGAACAGGATCTATATAGACACATAGACCCATGAATCCATACATTTCGATTGAAAAAGAATTGAAATTGATGAATATATCTCTCGAAACAAACGAAAAGGAAACGAAAAACAAAAACATAAATCATGGATCAATTAAGCCCTCTCGGGACTTGCTTAAGAATGAGAAAGAGGAATCTTATGTAAATACCACAG
Gma.16767.1.S1_at	CD415303	At1g14610	0	Protein Synthesis			AGTCCACTGTTAAGTCTCTCAGGTCACTGGCAAAAGAAAGTCGTGACAGGCGACCAGCTTTTGTTCTCTGCCGAGCACCGGTGGTTACTGAGATTATTAACAGCCACCAACTAGAGATTGTAACATTAGCTAATCTATCCTCTTTGACAGTAATCACTGAAAGAGATGCTGTTCCATCTGGATATGCTGATGCTGTTGTAAATGAAAACCTTTCTGTTTATTTAGAGCTTCAAGGAACTAATTCTGCAGAAGCAGAGGGGAAGATCAAGAAGATAGATGAGCTGAAAAAGCAAATAGAAAGACTAGAGAAGATTATGAATGCTAAAGGTTATGAAGAAAAGGTTTTGCCAAATATTCGAGAAAAGAACCAGGAGAAGCTAGATTCCCTTAAGTTATTGC…
Gma.16404.1.S1_at	CD417934	At4g15000	4e-54	Protein Synthesis			AAAGCCGTCATCGTCCTTCAGGGACGCTACGCCGGCAAAAAAGCCGTGATAGTGCGAACCTTCGATGAAGGCACGCGCGAGCGCCCCTACGGGCACTGCTTGGTGGCAGGGATAAAGAAGTACCCTGCGAAGGTGATCAAGAAGGATTCGGCCAAGAAGACGGCCAAGAAGTCGCGTGTGAAGGCGTTCGTGAAGCTCGTGAACTACCAGCACCTCATGCCCACGCGCTACACGCTCGATGTCGATTTGAAGGACGCGGTTACCCCCGACGTGCTCCAAGCCAAGGATAAGAAGGTTACTGCTCTCAAGGAGACCAAGAAGCGCCTCGAGGAGAGGTTCAAGACTGGGAAGAATCGGTGGTTCTTCACCAAGCTCAGGTTCTGANCATAATATTATGCA…
Gma.16034.1.S1_a_at	CD403617	At5g20180	7e-19	Protein Synthesis			GGAGGGTGGGATTGGCCTCTATTCTGTCTATGAAGTAGCAAAAATAATTAGTAACCTCGAACATTACGAGTAATAAGTGCGAAGAGATTGATAATCAACGGTTATGGATTNAGGCCTCCATCTTGCTCTTGCCTTTCTTTGTATTGGTTGATGAAGATTTTTTCAAACTTTTTTTTTGTTTTGTGTGATATTTGATTTACATCACTCGGGGATTTTGTTTCTCCGTTAAAAATATGGTCAACAGATTGTAACCTCGTAGTA
Gma.15990.1.S1_at	BU081840	At2g34970	9e-42	Protein Synthesis			CTATTTTGAGTTGGGAAGCCGAGTTAAAAGATGCTGACGAGGCAGATAAAGTTTTTGTTAAGCAGGCCCAAAAGTTAATTCAATGGCTAAAAGAGGCACCTGAAGAAGACGATGATGACGAGGAATAGAAAGGATTTTTTTAAGGTGCTTCATCTCAGCCAAAGCTTAAAAGGGGCTTCAGTGCATTCATCTACCCTGTAATTCAAATAGGTAGTTATTTTGACATGTATTTGTGCATATGATGTGGGGGAATTAGTTAAGGAAAATTTGAAAACGCTAAAAGAACGTATCCCTCGAGTTTCTTAAAGCACTACTAAAGTCTCTTCACACTG
Gma.15934.1.S1_at	CD391208	At5g02610	5e-54	Protein Synthesis			GGTTTACGAGCTTAGGAACAAGACGAAGGCGGAGCTGCTGAACCAGCTGAAGGATCTCAAGGCGGAGCTTGCCCTGCTCCGCGTCGCCAAGGTCACCGGCGGCGCCCCCAACAAGCTCTCCAAAATCAAGGTGGTGAGGCTTTCGATAGCGCAGGTTTTGACGGTTATTTCCCAAAANCAGAAAGCGGCGCTGAGAGAGGCTTACAAGAAGAAGAAGTATTTGCCCCTTGACCTACGTCCCAAAAAGACCCGCGCCATTCGGAGACGCCTTACCAAACACCAGGCGTCTTTGAAGACGGAACGTGAGAAAAAGAAGGAGCTGTACTTTCCACTAAGAAAGTATGCGATCAAAGTTTAGGTTAGAATTGGTTTCNAGTTGCATTTTTTAGGNCAGTTACT…
Gma.15789.2.S1_at	BI788080	At2g37270	6e-97	Protein Synthesis			GTTGCCAAGGCAAACCGTTGAGCAGCTTGTGGAAGCAATATTTGCGATTGTGAAGATTTTGTTTTGGTCTATGTTATTCATTTAATGATATTTTAATCTTTTGCTTGCATTAGTTACTTTTTAGTTTTTTGCCTGCTGGCTTCTCAAGTTACGAATGAATGATTTTGTTGCTTGGACGAAAATCTAAGGNTGAGTTTTAGTAGTAGTCTGTTTCATAAAGTAATCCAAAATCAAACGTGTCNANCTGGATGTGATTTCTGGAAAATTAACCAAGAACTAGAGATGACCCAGTAATATGTAGTTTGTCGCTTTTGACTGATTANANNAGGTGAACGTGCGTACATTATTGTTGAACTATCATCAAAGGAAAATCTCTTAATTGTAATTTATTTTGGCAAC…
Gma.14419.1.S1_at	CD402292	At4g37660	1e-28	Protein Synthesis			TTCTCAACCTCAACAGGTTCGAGAGGCACGACTTCACGGTCCTCTGGCGGCTCAAGATGGGTCTNCACCGCTANNNCGNCGCNCCNGTGGCNGGCNTNNCGANGCCGTCCGTCGNNNCGGCNGCNNGNNNNNAGGTCGGTGCTTCCGTGGCGGTGGAGAAGACGGCGTTTGATTTGAAGTTGGAGAAGTATGATGCTGCTGCCAAGATCAAGATCATCAAAGAAGTTAGGTCTTTCACTGATTTAGGGTTGAAGGAAGCCAAGGAATTGGTGGAGAAGGTTCCTTGTGTTTTGAAGAAGGGGCTCACCAAGGAGGAGGCTAATCCCATCATGGAGAANCTCAAGGAGTTGGGCGCTGCTGTTGTGTTGGAGTGATGATTCTGAATTTTTTTTCTTTGTG…
Gma.13895.1.A1_at	CD409209	At5g59530	2e-15	Secondary Metabolism	Ethylene Biosynthesis		TATCAAGTCATACAGGCCCCAGAATTTCAGTTGCAAGTTTCTTTGCAAACTCATTTCAACAGAGTTCATTGAAGGTTGTTGGTCCAATAAAAGAGTTGTTATCAGAAGACAATCCACCAATCTATAGGGACACTACTGTTAAAGATGTCAAAGCACATTATTTTGAGAAAGGCCTTGATGGGAACAATTCCTTGCACCCCTTTAGGTTGTGAAGTGAATAATGAGAATTCGATTAGAGCACTCTTGATTCCTTTGGAGTTGGCTTTAGTGTGCATTTTATCATGGTTAACTNTTTCCTTTGACTGCGATTTTCAGTATCTTGTAACTTCTAAATAAACAACATCAAGTTCTAGAGACAGAGCATGGTTAAGGCACCCTTAATTATTTGCACTGCACAAG…
Gma.15664.1.S1_at	BM269655	At2g45400	1e-77	Secondary Metabolism			ATTCATTGTACCCATTGAAGAGATGGGTGAACTTCTTTCAGCCAAATACCCGGAATTTCAACTACCAACAGTAGACGAGCTGAAGGGAATTAAAGGTGCCAAGCAACCACATTTAACCTCCAAGAAACTTGTTGATGCTGGTTTTGAGTTCAAGTATAGCTTAGAGGACATGTTTCAGGATGCAATTGAATGCTGCAAGGAAAAGGGTTATCTTTAATCGAATTTAGCCATGAAGTTGACAAAATAAAATTGATGCATATGGTTGTTAGTTTGAACTATTTCAGATCGATGGCAATCATGNCTAATGACATATATGTACATCTAGGAATGCATGATGTTACTCGTAATAGATGAATGAGGAAAATAATCTTCTTCGTTTGTCTAAATGCTAAATA
Gma.11298.3.S1_a_at	BE059139	At1g04680	0	Secondary Metabolism			GCATATTTTTCTCATGTCTCCTTACATACTGTTCAATCATTTTCAGTTTTATAGGATTTGAATTGAATGAGTCCAATATGATTTTTCTTTTACTCCCCTGTTATTAATTTACTATTTGTTTTGTTAGTTAATTATACAAGCAAAAAAAGCATGATTGTCAAAGTCTAGTTACATGGAAA
Gma.12393.1.S1_a_at	BM093715	At3g14440	0	Secondary Metabolism			GGGAGCCTCTGTTTCTTCCAAATGGTGTCGACGGTGATGAAGACGATGGCCATATTCTCGCATTCGTGCATGATGAGAAGGAGTGGAAATCGGAGCTGCAGATTGTCAATGCCAAAACTTTGAAGCTTGAGGCTTCAGTTAAGCTTCCTTCCAGAGTTCCTTATGGGTTTCACGGTACTTTTATTCATTCCAAGGATTTGAGGAAACAAGCTTGAATTCAATTATTGGGTGACGACGGTAAAAAAAAAAAAATGTGATTTTTTTTTCACTTTGGGAGGAGAGATTTAACTGCGGGATGCTTGCAGATACGCCCCCGGAATCTACTCCTCTTCTTTTCTGTTGCAGATTTTTATTTTTACTTTTTCTTCATTTTTTTTTTAAAATTTGGGGTTAATTACT…
Gma.1332.1.S1_at	BI970666	At4g11280	0	Secondary Metabolism	Ethylene Biosynthesis		CTTATACTGCAATTGTAAGGTCGATGATCAATAAATTGTT
Gma.3591.2.S1_at	BE473658	At1g12010	1e-28	Secondary Metabolism	Ethylene Biosynthesis		TCTCAGCATGTGGAATCGGTTATGTGTGTTTCTGTTAATAATAAACAAAGGCTACTCACAACATATTACTAGTGTTTGGTGTCCTTGGATAATTGGCATGGAAGCTTGTGCTTGTGCAGTATAATCAAACCTTATATAGTTCAAAAAATAAAAGTTATTAGGTTGATCTTAATTAGTTTGTGCGTGTGATCCATGATATGATGTCGCCTGTGATATGATGGTTAAGATAGTGTGGTATGTAGTGATACACTGTTTTAGAAAGTAGTCTCATCTTGCCCATATTACAAGGAACTGTCTCTCATAATTCCTCTTTGGCTTATGATTATATGAACAATATAGAGTGAACGATATATTCTTACTTTT
Gma.3085.1.S1_at	CD402509	At2g16530	2e-29	Secondary Metabolism			AATTCCTCATGGTGATTGGTTTGAAATTGTCTCCTCTCCACATTATCTGTCTGAAATCGTTATATACGCTAGTTTTGTGGTCGCTACTGGAGGATCCAACCTAACAATCTGGCTGCTTTTTGTTTTTGTGGTGGCAAATCTGTCATTTGCAGCTGTGGAAACACATGGCTGGTATCGTCAGAAATTT
Gma.1779.1.S1_at	L12453.1	At3g48730	0	Secondary Metabolism			TTCTTCACAGAAGGACCAGTGTATAATTTTGCAGATGCCAAAAAGAGTGATACGGNCAAGTTTGCTAGGTTCTTTTGGGGAATGNTGGCGGAAGGTGTCTATTTGGCACCTTCCCAGTTTGAGGCTGGCTTNACCAGCTTGGCACATACNTCTGATGACATAAAAAAGACNATAGCCGCTGCTGAGAAGGTTTTCAGGGAGATCTGATNGTTAAATTTTGTTTTGTTGCNAATTTANTTTTCNGNNGGTGAATTTTNTAGGTCAATTTAGATTATTGTTATGGCAGTTGCTTTCGTTATGATCTGTATCATTTTCNCATCCTGTATCTANCCAGTGTATTATGTTGAGCTGTNAGTTACTTGAATNTGAAGCNTGTAAGCATTCGAATTCATTGTTTAA…
Gma.18101.1.S1_at	BE820013	At5g16010	2e-87	Secondary Metabolism			AGAACCACCAATCGATCTGTTGTATCCTGGCATTGTTTTGTTTGTGGTGGGCATCATTGGCAACTTCTACCACCACTACCTTCTATCCAACTTAAGGGGAAAGGGTGAAAAGGAGTACAAGATTCCAAAGGGTGGCATGTTTGAGCTTGTCATATGTCCCCACTACCTGTTTGAGATTATTGAGTTTTATGGGTTCTCCTTCATTTCGCAGACGCTATATGCATTCTCTTTCACCGTAGGCACTACTTTATACTTGCTAGGTAGGAGTTATTCAACTAGGAAATGGTATCTTTCTAAGTTTGAAGATTTCCCTGAGCATGTTAAGGCTATCATCCCATTTGTCTTCTAGAAATGTTGGAAGGAATAACTAATTTTACTTTCATTTCTCAGACGCTATAT…
Gma.4611.1.A1_at	BE440300	At4g38460	2e-73	Secondary Metabolism	GA Biosynthesis		GGGAACGGGTCTTTCCTCTCTACAGTTTTGTGGATTATGCTTTTGATAGAAGTTTCAGTGTTGATGATGCCAGTGGATAACGGGTGGTTCTTGATATTTATATATTTATAGTTCTTTGATTGATCGACTGACTACTTGATAATCGATCATTGCATTGCATANAGAACTTACACAGTTTAGAAAACGGTACTGCNNNTCTATACAATCAAATGAATCATCCTCAGCATTTAGACTTTACCGTTCTTTTTGTGTTGGATATCTTGACCATTTACAGAGATGAGGAAGTTCTGAAGCATGGACCCATAAAA
Gma.5146.1.S1_at	AW309597	At4g16770	4e-87	Secondary Metabolism	GA Biosynthesis		GGGCCTTTATTGTGAACATCGGAGACTTGATGGAGAGGTGGACTAATTGTTTATACCGGTCAACAATGCACCGGGTTAAACGAACTGGAAAAGAACGCTATTCGATGGCATTCTTCTTAGACCCTCATCCAGACTGTGTGGTGGAATGCCTCAAAAGTTGTTGTAGCGAATCATGTCCTCCAAGATTCACTCCAATCCGAAGTGGAGACTACATGGATGAAATTTTAAGCAACACACCAGTCTGACAAGGATTTAAAATGCTCCATCCTTTCATTTATTTAAAGAGCTTAAACTTGTATGTGGCTGTAAACAGAAGAAGGATGCGAGACTCACCACAAGACCTTGCTTCATTTTAAGTCATTTCTTGTGCATTATGGCTGTAGCCATGTAAAACGGACA…
Gma.5579.1.S1_at	AW119360	At5g13930	1e-103	Secondary Metabolism	Flavonoid Biosynthesis		ATCTCGAAGAACATCCAAAAGGCCTTGGTTGAAGCCTTCCAACCCTNGGGAATTGATGATTACAACTCTATCTTTTGGATTGCACACCCTGGTGGACCAGCAATATTGGACCAAGTTGAGGCTAAGTTAGGCTTGAAACCTGAAAAAATGGAAGCTACTAGACATGTGCTCAGCGAGTATGGNAACATGTCAAGTGCATGCGTGTTGTTCATCTTGGATCAAATGAGGAAGAAGTCAATAGAAAATGGACTTGGCACCACTGGTGAAGGGCTTGAATGGGGNNNNNNATTTGGTTTTGGCCCTGGACTCACTGTTGAGACTGTTGTGNTTCGCAGTGTCACAGTCTAATCATATCCTTTCTTATGTCTNACACGTCNGTTTGANAAATGTATTCTTTCT…
Gma.6643.1.A1_at	BE823205	At5g07010	6e-24	Secondary Metabolism			TCAAGCTATGCAGCTTCGAGAAGATGAAGGAATTGGAGGCAAATAAATCTGGAACATTTGCTAGGAACTTTGAGAGAAAGTACTTGTTCCGAAAGGCTGAAATGGGAGATTGGGTGAACTACCTTTCCCCTGAAATGGGTGAAAAGTTATCGCAAATTATGGAAGAAAAGTTAAGTGGGTCAGGCTTGTCATTTTAAGTGTCTCCTTATTTTTGTTGATCGATCACTAGCTAGTGATCATCATCTACATCAAGTGTCTAAATAAGAATCGTGCATATATGCAGGTCATGATGTGGNCTACAAGTGCATGTTCGNTGTGATTTTCCCTTTTCCCGTTTGGATGATTTTTCCTACTAGTGCATTGAAGGTCTCAGTAA
Gma.6850.1.S1_at	AW397629	At5g42830	9e-10	Secondary Metabolism			TTCGGTTCGGGCAAGCAGATTTTTCTTCCGTGACTAATGAACGGCACTTGGCTCCCGAGTAATAAAGTTAAAGCATCCGTACT
Gma.9531.1.S1_at	CA820670	At1g48420	2e-99	Secondary Metabolism	Ethylene Biosynthesis		GGAGGAGGCCATATGTTATACCCGTTGGCGGATCAAACTCTTTGGGAACATGGGGTTATATAGAAGCAGTACGGGAAATTGAGCAGCAGATTCAGAAGGGGACAGGCAATGTCAAGTTTGATGATATTGTTGTTGCTTGTGGCAGTGGT
Gma.910.1.A1_at	BE659128	At1g24360	4e-08	Secondary Metabolism	Enterochelin Biosynthesis		AATCCTTTTACCTTGCAACATGAGCTTTTGCACTTTTAAACTACTTCTGTACGGTGATAGTTTGTTCTTTGCTGAGTTTTGTTTAAGCTAGTTTTACCCTGTGATTTATCGTAGAATATTAGTTGAAATGCAATTCAGTCACTTTTGGCACTAGCTCTGAATTGCTTACTGATGAAATGCAATGTGTCCAGCATCTTGTACCATTTTGGTTTTTATGGTCATGTNAGCAGAATAGGCATAATTCTTATATGCNATTCAGTCACTTTTGGCACTAGCTTTTCCTTCTTGGATGTTCTTTCAGGGAACTGTCTCATTTAAGCAAGCATTATTATGTTTATTTTCTGGTTTCCCGAAAAGNNGTANGCTTTTAGGCTTCCTATCCGAATTACTAT
GmaAffx.18868.1.S1_s_at	BI971360	At1g76690	9e-76	Secondary Metabolism	JA Biosynthesis		CTTGCACCAATGAAGAAGGCCTTTAATGGCACTTTCATTGTTGCTGGGGGTTATGATAGAAAAGAAGGGAACAAGGCTGTGGCTGAGGAGAAGGCAAATCTTGTTGCTTATGGTCGTTTGTTTTTGGCTAATCCAGATTTGCCTAAGAGGTTTGAGGTTGATGCACCACTCAACAAGTACAATAGGGAGACCTTCTACACTCCTGATCCAGTTGTGGGTTATACTGACTATCCATTTCTAGAAGGAAGTTCTTAATTAAGGATCACATGAACTAGAAGGGTGGATTTACTCTTATGTTTTGC
GmaAffx.27888.1.A1_at	BI967168	At4g35160	0.0004	Secondary Metabolism			TGTGATGGTGCTGTATCCTGGAAAAGAGAGAACTGAGAAAGAATGGGCCAAACTGATTTTCTCTACTGGTTTCAGTGACTACAAGATAACTCCAGTGTTGGGTTTAAGGTCTCTCATTGAGATTTACCCATAACAACTTCTTATGAAATGTGGTATATAGGAGAAGGACCAGCACTATCATCAATAAAGGCTCATTCTCCCCTTCACAAACCAAAAAATAATATATAGTTGTAATAATGTTCCAAATGTCCCAGCACTCTGTCATAAGTAAAGGTCCTCGGATTATTTTGTATTTTAATTTGTCTTGCAGTGTAATCTATA
GmaAffx.3544.1.S1_at	BM307751	At1g79460	3e-16	Secondary Metabolism	GA Biosynthesis		AAGTGTAGTTCCCAGAGAGTGCAAGGATTTGTTTTGGAAAATGATAAAAGTGTTGCACCTGTTTTACATGAAGGATGATGGATTTACTTCACACGAGATGCACTCTAGTGTAAATGCAGTACTTAAAAAACCTGTCATCCTTAATGAATTGTTAGTACATTCTCAGCAGAACCTTAGTCCTGTCAAAGCCACTAATGACCTGATGCTCTAGTCCAATTTGTACATACACATGACAAGCAAGACCTGCCCTTGCTTTTGAGTGATCATTCTATANNNNCNAAATGTCCCAATCTTTCCTAACTTTTTACCAATTTATTTTTTTCTCTTACTTTTAGTTTTTTACTTTTCATGATGATCATTTTTTTTTTGTCTTGATTGTCTCAGGATCCA
GmaAffx.32612.1.S1_at	BU762383	At4g35160	2e-40	Secondary Metabolism			AAGACTCATCAGTGAAACCTTCCCTCACTTGAAATGCACTGTGTTTGACCAACCACAGGTTGTGGCTAATTTAACTGGAAACGAAAATTTGAACTTTGTTGGTGGAGATATGTTCAAGTCCATCCCCTCTGCCGATGCAGTTTTACTCAAGTGGGTTCTGCATGATTGGAACGATGAACTCTCTGTGAAGATATTGAAGAACTGCAAAGAAGCTATTTCAGGGAAAGGGAAAGAAGGAAAGGTTATAATTATAGACATAGCAATTGATGAAGTAGGTGATGATCGCGAAATGACTGAATTGAAGCTAGACTATGATTTAGTGATGTTGACTATGTTTAATGGAAAAGAAAGAGAAAAGAAAGAGTGGGAGAAACTAATTTACGAGGCAGGATTCAGCAA…
GmaAffx.42116.1.S1_at	BQ081473	At5g13930	3e-23	Secondary Metabolism	Flavonoid Biosynthesis		GTCACTGTCTAATCATATATATTGAGCAAGAACACAGATCCTTCTTTTCTTCTTATGTATTATTGCTTTTTTAGTTTGAAAAATGTATTCTTTCTCTTTTGCTTTCTCACATTCTTCTTTTTTGTATACCAGT
GmaAffx.8111.1.S1_at	BE659080	At2g29340	1e-19	Secondary Metabolism	Enterochelin Biosynthesis		TAATAGTCTGATTGCGCGAACCCCTCTTGGACGGATTGGAGAGGCAGAGGAGGTTTCTTCGTTGGTGGCATTCCTCTGCTTACCTGCAGCATCTTACATAACAGGACAAACCATTTGTGTTGATGGCGGCTTCACCGTGAACGGTCTCTACATAAGCTAGGCTTATTGTGACAGTTTCAATGTTTTGTTTAGTCTGTTACACTCTACTTGTATTAGTTTCTCTTTAAGTTGTGGAGAGTGGAGACCCTATATCTGTTTTTAAGGACGTGATAATAACAGTACTCAGTGATAAGTTTGTTTTTCTTGTTTTGATTTAGTCACATGTCCCATGATTCTAGGAGCAGTATAATCGTGGGCAGTTTATCCTATTTCCCGTTGGTTGTAAGGCTTTCAAT
GmaAffx.74999.1.S1_at	CB063650	At3g58500	2e-86	Signal Transduction	Protein Phosphatase		TCTGTTTGCATGGTGGACTGTCGCCTTCAATTGAGACCCTTGATAACATAAGGAACTTTGATCGTGTTCAAGAAGTTCCTCATGAAGGCCCCATGTGTGATCTATTGTGGTCTGACCCANATGACANATGTGGCTGGGGAANNTTCTCCTCGTGGTGCTGGATATACTTTTGGCCAGNATATATCTGAACAATTCAATCACACAAACAGCCTTAAGTTGATTGCTAGAGCTCATCAGCTTGTTATGGATGGATTTAACTGGGCTCATGAACAAAANGTGGTTACCATTTTTAGTGCACCTAACTACTGTTACCGATGTGGGAACATGGCTTCCATATTGGAGGTTGATGATTGCAAGGGNCACACATTNATCCAGTTTGAACCTGCTCCTAGGAGAGGA…
GmaAffx.75256.1.S1_s_at	AW756867	At5g42970	4e-15	Signal Transduction	Unclassified		TGACACTGAAGAGTTGCAGCGATGGGACCAGCAGATTGTGGGCTTATGTCAAGCCCTCAACGATGTTTTGGATAGCATGGCCAANNNNGGTTTTCCGGTTCCTGTTTAACGTGGATGGTTGACAATTTCTTTGTTTATACATTCTTAGTAAAGCATCTTTTTTTTCTTTTGTTGATTTTTTGTGAACTTCATTATACAAACGAAACCATTAATTTCCTCATATATTTGGTCCAAATTTGGTTTACCCCAANNNNNNGTTTAATTACTGCTTCTGCTTAACGAG
GmaAffx.77602.1.S1_at	BQ627622	At3g17090	2e-45	Signal Transduction	Protein Phosphatase		GGAGCACCTGAGTAATGATCAAGCAGTGGATATTGTTCACAGCAGTCCATGCGCGGGTAGTGCGAAGAAACTTGTCAAGGCTGCCCTACAAGAAGCAGCAAGAAAACGTGAAATGCGATATTCAGACCTTTACAAGATTGACAAGAAGGTTCGTCGCCATTTTCACGACGATATAACTGTTATTGTTTTATTCTTAAACCACAACCTTATATCCAGGGGTGCAGTTCTAAATACACCACTTACAATTCGTAGTGCTCTCGATCACTGACNCTTCATGATTTGTAAACATGCTTCTCTTATACGGGTGTTCTGGCAACTGTGCCAATACCAGAAAATACACCATTGGTACGTTGCTAGAATATACCATTCATAGTGCTGCCACGTATGGTTACTGATA
GmaAffx.52826.3.S1_at	BF596503	At1g07430	1e-74	Signal Transduction	Protein Phosphatase		AGTTGTATCGTTTTCGTTTCCACAGGTCGCGACTATGTGCAAGGAGCGGTTACACGAGATCGTGAATGAAGAGATTGACAGCGCGCGCGAGAATTTGGAGTGGAAGCTGACGATGGAGAACGGATTCGCTCGCATGGACGACGAGGTTNATCGCNGGAGCCAGAGCAACCAGACCTTCACCTGCAGGTGNGAGCTCCAGACTCCNCACTGCGACGCCGTCGGATCCACCGCCGTCGTCGCCNTCGTCACGCCGGACAAANTCGTCGTNTCNAACTGCGGCGACTCCCGCGCCGTCCTCTGCCGCAACGGCGTCGCCATCCCTCTCTCCTCCGATCACAAGCCGGATCGACCCGACGAATTACTCCGAGTCCAATCCAAGGGAGGGCGCGTGATTTACTG…
GmaAffx.57055.1.S1_at	AW203411	At2g42880	9e-68	Signal Transduction	MAPK		ATGACAGATCTGCTTGGGACTCCTTCACTTGATACTATATCACGGGTACGTAACGAGAAGGCAANGAGATACCNNACTAGCATGCGGAAAAAGCAGCCTGTGCCATTCGCTCAAAAATTTCCCAATGCAGATCCTTTAGCACTAAGGCTACTGGAAAAGTTGTTGGCTTTTGATCCAAAAGACCGACCTACTGCTGAAGAGGCTTTGGCTGATCCTTACTTCAAGGGACTGGCAAAAGTTGAGAGGGAACCATCTTGCCAGCCTATCACGAAAATG
GmaAffx.69025.1.S1_at	BM271195	At2g24990	5e-21	Signal Transduction	Protein Kinase		ACCGAGGAAGCTGTTAGTTGTGTTAGCAATAGCACACACACAGCGATGGAAAACGACGACGAACACAAGCTCCACAATCACAGAGAACAAGTACAAGAACAAGAACAAGAAAATGAAGAAGAAGAACAAGAAGATGAGGTTTGGAGTTCTTCGGATTCTGAAATCGGTGAAGCGTTGGACTGGTTGGATTCAAGGGAGGAAGATGAAGGCTCCTCCTTCTCCCTCACTTCGTGGCGCCCCAACGCTCATGGCGGCCACCACCACCATTCCTCCACTCTGCAACCTCTCGCCAATCGCAACCAGAAGTTCTCCCATCACATTCGTGCTTCACCCTTGGAGGAGT
GmaAffx.62926.1.S1_at	BE804949	At1g31930	2e-86	Signal Transduction	Small GTPase		GAATGGACAAGGTTCTCCCGGTCAAACTATGGAAACAGGTAGCAATGGTGAAGCAAGTAATACTAGTGAATGCATCTATTCCCTCAACCCAAGGCTAAAACATTTCTCTGACTGGCTCCTGGACATTATAGCCACTGGGGATTTAGATGCCTTCTTCCCTGCAGCCACGCGNGAATATGCACCATTAGTTGAAGAAGTATGGAGGGANCCTGCAATACAAGAAACCTTCAAAAGAAAAGATGAGCTTCACTTTCTTCCAGATGTTGCCGAGTACTTCTTAAGCCGGGCNGTTGAGATATCTAGCAATGAATACGAACCTTCTGAAAGGGACATAGTATATGCAGAAGGGGTTACTCAGGGAAATGGTTTGGCTTTCATGGAATTTTCACTTGATGACCG…
GmaAffx.40750.1.S1_s_at	BG352469	At5g53000	2e-07	Signal Transduction	Protein Phosphatase		GGGATAAGGAGTTCTCTAAGGATGTTCTTGATGAACGTGCCAAGAAAGCAGAA
GmaAffx.38138.1.S1_at	AW309382	At4g26570	1e-110	Signal Transduction	Calcium Binding	AtCBLs (Calcineurin B-like Calcium Sensor Proteins)	GGAATGGTCTTCGATTGACTTGTGAATGATGACCGGGTTCTATGTGAAGGATTCGGTACGGGGTGGATATGGAGTTTATTTATATTTTCATTACAAGTAGAACTTTGTCTTCCCGTTTTTGGATGGATGAGGTTTGTAGATTGAACAAATGGGTTTGATTATTTATTTATTTGCTTCATTTGAGAATAAAAGGGGGAACANAATAGAATATTCAGGCATTTCAGCATTAGCACNTTGGAATTAATTTTGNTGAGAAATATGTTTACCANAAGTCTTGTGCAATNGCTTCAGCAATCTGTGAAGAGTTCTTTGAGCACATGCC
GmaAffx.33721.1.S1_at	BI967195	At3g20860	4e-09	Signal Transduction	Protein Kinase		GTACACATTCTTTGCTCCACGCATAAAGAAGATGATAATGCGGTGGAGGTTGATCAGGCACCAAGAGGTGTNTCATTGAGTGTAATAACTGAAGTAGATGGTGATGAAACAATCAAGACTCCGGTGGATAGTCCCTGCCAGCAAAGAGCGGATGCTCTGGAATCTCTGCTCGAATTATGTGCTCAGCTACTCAAGCAAGATAAACTCGATGAGCTTGCTGGGGTGCTAAGACCATTTGGGAAAGAAGCTGTCTCATCAAGAGAAACAGCAATATGGCTGGCAAAAAGCCTCATGTCTGCCCAAAAGTTTAATGCTGAAGCCTAAGTTCTGGCCATAAATTTATACATTGTTGTAAGAAATGTGCATTTCAAATGTCACATGAGTTCCTTTCGAGATTTG…
GmaAffx.35805.2.S1_at	BF324178	At3g58640	6e-68	Signal Transduction	MAPKKK	Raf	AAGTACTGGAATCTCCAATGTTCAATAATAAACCTCTGTTACCATATGAAAAATGGAACATTGACTTCTCAGAATTGACTGTTGGAACTCGCGTAGGGATAGGTTTCTTTGGAGAAGTTTTCCGTGGCATATGGAATGGCACAGATGTTGCAATCAAGGTTTTTCTAGAGCAAGATTTAACTGCTGAAAATATGGAAGACTTTTGCAACGAGATATCTATTCTGAGCCGGCTCCGACATCCTAATGTTATCTTGTTTCTTGGTGCATGCACAAAGCCTCCACGCTTGTCAATGGTTACAGAATATATGGAGTTGGGATCATTGTATTACTTGATGCATTTGAGCG
GmaAffx.25928.1.S1_at	CD414013	At3g15610	1e-58	Signal Transduction	Protein Kinase		GGGCACCATGGTCCTGTCCACTGTGTTCGTTTTTCTCCTGGTGGAGAATCCTATGCCTCANGATCTGAGGATGGAACCATCAGAATATGGCAGACTGGCCCCTTGACCCTGGATGGCTCGGAGACTGTGTCTGCAAATGGTTCAGTTGATAAGGTGAAGGTTACTGCAGATGAGGTTTCGCATAAGATTGAGGGTTTTNAAATTGCAGATGAAGGGAAATCTAAAGAAAAAGACGAGGCTGTGGAGGAATCAAGCTAATAGTCGTGCATTTTGTCTGGCAGAGTGTTAGAATTAACTAGATCAAGTGCCTNNTANNNNTGTACGTGATTAGTAAANTAAATTTTGTAAATTTTAGTTTGTNNTTGAGATTTTACTGAATTGAACGAGCTTGTTGCANCT…
GmaAffx.24077.1.S1_at	BQ299007	At3g03940	2e-20	Signal Transduction	Protein Kinase		ACAGTATGCTAATTTCCTTCACAGGTCAACGTATTGTGTCTGAAATTTATATATTTTGTAATGGCCCAATCAAGTATAACATAGCAGAGAATTGTTGTATCTTTAGTATTATTCTCTCTCCCCTCCCATTCTATTACAAGTTCCTTGGGGGTGGGGGATGTGGCAGTTAATGTATACAGCTTGGCTTTATATGTTACTCCATTATGTATTATATGTAGGTTTTATCATTTTTTTTTGTCTGATTTTCAAGATTGTTTCCGTGACTAGTCTAAT
GmaAffx.15664.1.S1_at	BE607642		0.0001	Signal Transduction	Protein Kinase		GACTTGCAAGGGTTGGACTATTTGATGATCCTGNAAGGGGGAGTTCGAAGNNNTTCNNNNNNNNTAAGAGCCAACTTCCCTCCATGTTTTCCGCGCATGCTTTGCTTTACAAAAGTTGACTAAAGAAAAGAGAAATTAGAAAATAGCATTTTTTTTGGGGTTGAAAATAGAGGCTTGAGGAGTTGATGTTTTNCCCTATAAAGTATGTCAATATCAAGAATCTTCCCTACCAACGTTAAATTGATGTTTGCATCACAAAATTGTAT
GmaAffx.17383.1.S1_at	AW703644	At2g46700	1e-38	Signal Transduction	Protein Kinase		ATCAGCACACATCAATTGGAAGCACATGANNGGTGGGAAGATATTGCCTCAACTGCTTTTGAACATTTTGAGAGAGAAGGCAACCGTCTGATATCAGTTGAAGAANTAGCCAGAGNNNTNNNTNTTNNNNNTNNNNNTTATTCAGTTCTCAAAGATTGGATAAGAAATACTGATGGAAAGCTTAGTTTACTTGGATATACAAAATTTTTGCATTGTGTGACTCTCCGTAGTTCAAACCCAAGACAACACCGGTAGTCTTGGGCCCTTTGACATATAGTTTGAATATGCGGGAAAAAAAAATAGATTTAGAGATTTTTTGTGGATTTTTTCTTCTATCATTTTTCTTTATNNGNNNNNNAAAGAATATGTATAAATGAATGTGTTAGCAAGTCAATACAG…
GmaAffx.21787.1.A1_at	AW348555	At5g61480	0.0002	Signal Transduction	Protein Kinase		AAATTGCTTGATGGTGTTCTAGGTCGATGTGCTGGGGACAATGTGGTTGTTGGTGGTGACATTCCTTTGCCACAAAAGCCAATTGCGGATCAATGTTAATGTGTTTATATGATTGAAATGATTTTTCTTTTTTTGGATATTTTTCTTATTGTGGGGGATTGGTATAGGAGAATCATTTTCTATTTTACTTTCAATGGAATTTCAAGTGTTACTTGTTCTAGTTTNNNNTTCTCCAGTGACACTAGTGTTATGACTCTTGTGTGCTCA
GmaAffx.21936.1.A1_at	BG237767	At3g02750	0.0001	Signal Transduction	Protein Phosphatase		TATAGATACATACCCTTTTTCTTTTNTTTTTTTTTTTTTTGTTCTTTTTGCACAATTTTCTTTTCTATTTATATATTCATGTTCCCACCCANTGATGTTTTTGTTTGGACTATAGAGAGGATGGCTGTTTTGGGCTCTTTTAGTGTGTCTGGAAATCTGTCCTTCCTCACGTGTGCTTGAAGATTTTGTAAAATCAAACTCGTCATAGTGCATACCTAAT
Gma.8397.1.S1_at	BI321777	At1g09020	1e-105	Signal Transduction	Protein Kinase		GAAAGTGCTTTCTACACGGTGATTTTATCTCTCATTTCATTGTAATACAATTGGATTGGCCTCTTGCTTTATTGCCTCTTTTTAAGATTTTAGGCTGAGAAAGAGGCCTGTAAATTCAGAGTATTTGATTGCCCNAAATTTATTCATCTCTCCCCATTCGTATTATNNCTTCANAATGTATTGTGCTCCTGACATAGATACCAGCAAGGTGGGGGAGCACAACNTCTGTAATCATTCCCATCTGTGAAGATATCAAGTTTGAAGAAAAAAAATGAGGATGAAGATTGAAATAATGTTGTTTTATATTTGTTGATTAATAATCCTTAGGGTTTGATTGTTTACCTTAAGAACTTCAGCCGGAGTAGCTTATGAATAANGAACCGTTGCATATGAAGTTGT…
Gma.7226.2.S1_a_at	BM887472	At3g45640	1e-159	Signal Transduction	MAPK		GTTGCATCTTTATGGAGCTTATGAATAAAAAGCCTCTGTTTCCGGGCAAAGACCATGTGCATCAGATGCGCNTATTGACAGAGCTTCTTGGCACCCCAACTGAGGCTGACCTTGGGTTAGTGAAAAATGAAGATGCAAGAAGATATATCAGACAACTTCCTCAATATCCTCGCCAACCTTTAGCTCAAGTCTTCCCCCATGTTCATCCNGCAGCCATTGATCTTGTTGATAAAATGNTGACAGTTGATCCCACCAAAAGAATTACAGTTGAAGAAGCACTAGCCCATCCATACCTTGAAAAACTGCATGATGTAGCTGATGAACCAATCTGCATGGAGCCATTT
Gma.7177.2.A1_a_at	BI425372	At4g13020	1e-30	Signal Transduction	Protein Kinase		GTTTTCTTGGCTTGACTTTAGGTGTAAAGCCCAGTGTTTCAAACTTAGATGTGGTCCAAAATGTATCTCAGGGTGTCAGAGAGAATGTTCTATTTTGCTCAGATTTCAATGATCATTCAGACCAGTCAGTATTTTGGACATTATTATCTCCTGATCAAAATGGAGTTCATAACTCAGCCGAGACTTCGTTGTCATTGTCATTCAGTTCAGTACAACATCCGCCAATTGGAGTTCCAGAGTCTGCGGGATTTTCTTTTCAGCCTTTGCAGCCTAACATCTTAACCGCACCATTTTTGGCTCTCTCTTCTCCCTTCCAGCGCGAGCACTGCCTTTGAATCACTCAACTTTTGAACTGCAACAGTATGATATTATTGAATCTTCATAATGCATATAACACTT…
Gma.794.1.S1_at	BU548829	At5g47750	0	Signal Transduction	Protein Kinase		AATGCATAGCTTCTCTGTCATCTCAAAAAAAGGCTTATAAAAACAACATTTCAANANNNNNNNNNAATGCACTACTAGGAATTCCAACCAGCCAATGGTGGTGATGATGCTCTTAAGGTCCCAATGGTATTGGTAAGTATGTAATTGTGGAAAATGGAGCACATGGGCATCAAACAAAATGAAGATTTAGTATATTTTTATTTGCTTTGTAAACAAGTGTCATGTCATCACAAAAGGACTTTTTTCCGCTTAGAAATTCACCATTGCCTGAATGCACTGTCATAGAATCTAAATCCAAAAATCAATTAAAATGCAGAATTAGTCTGTTTATGTGTTTTTATTTATTTGTTATGGCAATATAATTAGTAAGATTTTTCTTTCCATGAGCATTACTATTGG…
Gma.7387.1.A1_a_at	CD396910	At2g46790	2e-17	Signal Transduction	Response Regulator	Response Regulator: Pseudo	AAAAGACTGGCAGAGCAGCGGCCTCGGGTGAAGGGGCAGTTTGTACGACAACATAATCATCCATTCGCTGANGCTGGTGGNGATTCATGAACATTGTTCTCTTTAGGTTTCCTGTANNATTAAATTACAGTTGACTGTAACACCGATTGTGTCAACAAGGATTAGCNGTAGGGTGGTATCTGTGTGTTGTTGGAATCTGTTTATCCATTAGGCANAAGAAGAGTAGGCCAGTAGGGAGATAGCTAAAGGGTAGTGCTAAACATTCTTAGGTGTTTTCTTCTGGGTTTACATTTGGACTGCCACTTACAACTTTAGAATTGTAATTATTTAGTGGGATTGGTTTGGGTTTTGCCTGTGTATATGTTTTCTTGGTTGAATACTAATATGGGTCTGTAA
Gma.6684.1.S1_at	AW459859	At5g65280	6e-48	Signal Transduction	Unclassified		GGGTATCTGGGAATGCCTATGCCTTCCTTTCCCTCTACAGACTCACTAAAGAGAGTATATACGAAGAGAGAGCAAAATCATTCGCTTCCTTCTTGTATGATAATGCAAAATCTCTGGCTGCTGCCAATGGCTATTCACTTTTCCAAGGACTTGCTGGGACAGCATGCCTCTGGTTTGATCTGCTTGCACCCGACAACTCTAGGTTCCCAGGTTATGAATTATAGATGGTTAAAGTAGAGATGGTGCTTATTCTACAAGCAG
Gma.6123.1.S1_at	AW349800	At4g29830	1e-131	Signal Transduction	Small GTPase		GGAAACGACTTGCTTGTGGTTCAATGGATGGCACCATTTCAGTTTTTGATGTGCCCCGCGCCAAATTTCTGCATCACCTTGAAGGTCACTTCATGCCTGTGCGATCTCNNNNNNNNNNNNNTNNNNANNNNNGGCNGCTGTNTTACAGCTNCNGATGATGGAAACNTNCACATGTATGATGCNTGAGGGAAAAGCTTTAATTGGGACCATGTCAGGTCATGCTAGTTGGGTACTGTGTGTGGACGTNAGCCCAGATGGGGCAGCCATTGCTACAGGTTCAAGTGATAGATCTGTAAGGCTATGGGATCTTAACATGAGGGCATCTGTGCAGACAATGAGCAATCATTCAGACCAGGTATGGGGAGTTGCATTTAGACCACCTGGAGGGAGTGATGTGCG…
Gma.6034.1.S1_at	CA852628	At3g19420	3e-95	Signal Transduction	Protein Phosphatase		GGGAAACAAGAGCTCTACGCCAATTCGTCATGCTAGTGAGCCAAGAACTAACGTTGAAGGAAAAACAGTGTCCAGTCTCGAGGTGCCCAGNNCAGAAAGTGAGTTTAAGGCCATGGCTGCAGATGCTTCTGTTTTTACCTTTGGAGATGATGAAGACTACGAAAGTGATTGAACTACAACAANGANGGGTTANTTTGTTATCTTNATACTTCNANATTTGTACATAAAATTGCTTGCAANTTCCNNCACAACANTATTTTGGTCATCCATTTGTTTGTTTGTTGTAATNATAAATNTGGCTANTTCATTNGCTTAATGCACAAGTTAAAAATAAGAATACGCGGAGTTATCTGCNTGTATTGGTCCCCCTTCCCCCAACTGCCACAGTCTGCATTGGAT…
Gma.6306.1.S1_at	BE821956	At4g33950	3e-05	Signal Transduction	Protein Kinase		TCAACCAGTATCTTACCGGTAGCTTGGACATTGATGATGACGACATGGATGAGGACCTAGAGACGGATCCCGACCTCGACATTGATAGCAGTGGAGAAATAGTTTATGCAATGTAAGCTGCTGGCAAACAATGCAAACTGACTTCTCTGATCAATTTATAAATAGTATAGCATGGGTTGTTCAGTGGGTTTGGAATATGTGGGAAAAAAAAGATTTCACATCTGAAGGGAAGGATTCTGTGAAAAAGTTTGTTTTTTTTTTTTNATGTTGCGAGGATCATTCCTGCTTATATTTTTATGGTCCTTTCATGATTACATGCTGCT
Gma.5883.1.S1_a_at	CD396478	At1g50370	1e-164	Signal Transduction	Protein Phosphatase		CAGGCGTTCCATATTTCTTATAAGTTGGTGCAAATTT
Gma.4487.1.S1_at	BE022586	At4g26470	1e-31	Signal Transduction	Protein Kinase		CATCTAAATATCTGACTGCCTCTTCAGCCAAGGCAAAAGGGTTTTTCTGGTTTTCCCTTGCAATAAAGGCCAAGTTGCTGCACGTTGAATTTTAAAGAAACTGTCATTCCTGAAGTTCGTTATGTAAATAGTAAGTGTAGAGCTAAGTGCCGTATTGAAGAAATGTTCAAATTTACGGATTAAATGCTACTACCATAGTGATTATGTATCGGTTGCTGCTTCTTTCTCTTTCTCGCTTAGTATTCAATTCTGCTATGTATTGAACTATAAATAGCCTGTGCTAGTGCACTACAATAATGAGAGGCAAACTGGCAAAGTGCATATCTACTCATTAAGTAGTTTAGCCCTTCCTAAAGAGCATATATATCTACATGTGATGAAATGGGTTAAACTAGCTAG…
Gma.4455.2.S1_at	BE059560	At1g14370	2e-22	Signal Transduction	Protein Kinase		AATCGCCTCGTGTTCACTAAGCTGTGAACATAGAGCATCTGCATGCATGTAAATTCCTTAAATTTATCAGGTTGTGTTTTGGACCGCGTGCGTTGAGGCATGTGTACTTGAATGCAATTTTGGGTACTTGAATGCAATTTTGGGTCATGCACGGTAGAATAGTTAACACCACATTTATCCAAATGCTATGCAAGTTATTGCATCAGTATTCTGCATGTATATTTCCTTTTTCCCCACGTAGAATGTCTTGTTGATAATAACAACCAGACACATTGCTTCCCTTCTATTATGGGTGCCTCATA
Gma.3893.1.S1_at	U44850.1	At3g18130	1e-155	Signal Transduction	Protein Kinase		TATTCTGTTTCTCTTTTAAGGTTGACATGACAAATTTACCCTT
Gma.4049.1.S1_at	BQ786519	At2g23450	3e-82	Signal Transduction	Protein Kinase		GGGACATCAAGTCCAGTAACATACTNTTGGACTACAATTTCAGGTCCAAAGTNGCAGATTTNGGTCTTTCTAGACTNGGGATGACCGAAATATCCCACATTTCGACANCCCCACAAGGAACCCCCGGCTACGTTGATCCACAGTACCATCAAGACTTTCACCTCTCTGACAAGAGNGANGTNTATAGCTTGGGTGTTGTTCTTGTTGAGATCATAAC
Gma.4133.1.S1_at	BQ473544	At2g40120	4e-32	Signal Transduction	Protein Kinase		GAAAAGAAGGCCTAGTGCGAGACAAGCACTAAGGCATCCATGGCTTTCCTATGTTTACTAGTCCTTTCTATTGGAATTATCCTCATCATTCGCGGTCTCTTCTGCTTATTTTCCACATATAGCAAAGCTTGCAATCACAATTTTGGTTTGTTTACAAGCTGCACCAAGTGAATTCACTGTCTCATGCTGTATATTTTTTATGCCTGCTGATTTATAGTTTGTTTTTTGTTGTANANAANNTCNTNCCNNNNTTTTTTTTTTTGCCTTCCATGAATTGGGAGGTTATCAGAATAACATTTTCATGTCACCCCATTTGGTTCTAACATCATGTCTCATAATACAGGGGTTCCATNAATTCANNNNNNNNNNNNNAATATAGTTTCATTACAAAAACAAATG…
Gma.18018.1.S1_at	BE610216	At5g50860	6e-15	Signal Transduction	Protein Kinase		TGGAGCTGTTGGATACCCACAAGATGCATCAAATAAAGGACCTGTTTCATTTGGCGCCCCTGACACTTCCTTTTCTTCAGGGATATTTAATTCGAAACCTTCTGGAACGGTTAGGAATCATGGTGCTGCAGGGCTTCACAGAGGGAGGAAAACTAAGAAAGATGAGTCCCAGATGGCGTCATCATGGAAATTCATGCGTCCATTCAAGCCATCAACAGTNGGACTTTCCATGGATTTATTATTTAGGAGCAAATAATCAATCAGTTTCTTTTGATTTTGGCATCCTAGAATGAGGATAGTGATGATTTAGGCCTTGATACATCTTTTTTGCATTTCGNAATGGTTTTCATTTATTTTTTTTCGTGTCAGTTCCTATTTTTTGTATTTCATTTGGCATAA…
Gma.2496.1.S1_at	AF244888.1	At5g65700	0	Signal Transduction	Protein Kinase		GAAAAATGACAGACTCAAACAAGGAAGGAGTTCTAAAAGTTCTTGATCCTAGACTTCCCTCGGTTCCACTTCATGAGGTGATGCATGTTTTCTATGTAGCCATGCTGTGTGTTGAGGAACAGGCGGTGGAGAGGCCAACTATGCGCGAAGTTGTTCAAATTCTGACCGAGCTTCCAAANCCACCAAGCTCNAAACANGNNNNNNNNNCAATCACAGAATCCTCTTTGTCNTCATCAAACAGTTTAGNGTCTCCAACCACGGCATCAAAGGAACCNAAAGATAATCAACATCCTCCTCAGTCGCCACCANCCGATCTACTTAGNNTNNNNATTTNGAAGTGCTCAGTTGNGGANAGGGNTGTGTTTNATATTTNTTTCNTTTGGGTTGTGATAGCTTATC…
Gma.2356.1.A1_at	BI969099	At5g41990	0.001	Signal Transduction	MAPKKK	ZIK	GGGTTTGATGCATTCAATTCCACTTCAGATGTCAGGTTTTGTGGGCAAGAGGATGGACACAAGAATCAATCAGAGAACTCATCAGGCTCTTTAATCAATTCATGTTGCTGCCCATTCAAAAACTTTGACATATCAAGTATATGTTCTCTTACTCTAGCTGACAAAGATCCTTCAGAAGGGCTGCGGTTGGAAATTGAAGCAATAGATACATACTTTGAACAACGCTTTCGTGAGCTTGAGATGATGAGGGTGGCAGCCATAGAAAGTTTGAAGAGGAGACATGGCGAGAAACATACCTGTGATGTGATGCATTAGGATGATTTTCTTTGATTTTTTTTAAATATGCAATTTTTTTTGCATTCATTTACATCATTTG
Gma.3185.2.S1_at	BM890715	At1g14390	4e-45	Signal Transduction	Protein Kinase		ATTCACTGAGATCTCATATCCCTCCACANCTTGTGCACTTTGANAAACTNCAGGTATTTGATGTGTCTTCCAANNATTTTTTTGGAAACATCCCATCNTTTNTNATCTCTTTGCCTTCCCTTCAGTACCTAAACTTGGCNTCAAACCATCTAAGTGGTAACCTNTCAGTGAATATGGCATGTAGTTCTTCACTAACATTTGTGGATATCTCACACAACCTTCTGGTTGGAAAATTGCCATCCTGCTTTGGTTCAGTGTCTTCAAAGGCCANAGTGCTATATTCTGGGAACTGTNTGTCAACCNAAAANAGGTTGAATGATCAACAACATCCATTTTCTTTTTGCAAGAGAGAGGGGGCTTTGGCTGTTAAGCCTCCAGCTAAAAAC
Gma.3852.1.S1_at	CD399104	At5g27840	1e-159	Signal Transduction	Protein Phosphatase		GTTCCTTTGAGATATTGAAACCCGCTGATAGAGCTTCAGGAAGTGGTTCATCAAAAATGAATTTTAAGAAGCCACCCAAACTTGGAAAGATATAGTATTTGGCAAGGATTTTCGGTTCAAATAGGAATCCAATCCAGCTAACTCAACTTGTACGGAGTTGAAATTGTCAAGTAGGAGTTTGACATGGGAGAGCCTTCCTTCCACTCTACGATTGCAGATTGCCAATGATACTATATTGTAAACTGAACTACCCAGGCATTCTTCTGTGCAAGAGCAGAGATTATTGCTTTATACACCAGTTGGTTGCTTGTGTTTGGCAAATTAGCATGTAATTTGTGAGTGCAAAGAGATTTCATGTTACCAAATGCGTA
Gma.3223.1.S1_at	L01433.1	At3g22930	4e-67	Signal Transduction	Calcium Binding		CACCTAATTAATTGGATTGGACACCAATTTGTTAATTCAAAATTCATTGGCTTCCAACCTCCCAATGAAATAAGTGTTCTTTCTTTATTATTGTTTGTTGTATTGTACTATTATTCTACTTGTACTTAGTAATGACCAAGCAGTAGATTGGCACCCCCATTCCATTTGATCCATTCCAAAATTAAATTACTATTCTTGTAATTTTAGTTCAGTACATTTTCTATCCTCCGAGAGTAAGAAACCCAAGGAGCATATCTACCCATTAATTATGCATGACTT
Gma.3286.1.S1_at	BQ298747	At2g29900	2e-09	Signal Transduction	Unclassified		GGAATGGGCGTGTTGTTTTATTTCTTGACCAGGCTTTTACTTGAAGTATTTGTAGTACAATGTTCCTTAAATCTCCTGTTGTTCTAAGGTTAGAAATTTGTACTGTTAGGGCTTGGTCTACCAAACATATCATATGACCACGTATATTTTTAGTTGAAA
Gma.3291.2.S1_at	BM520616	At2g30980	1e-120	Signal Transduction	Protein Kinase		AAATGCCCGTCTTCCTAATGGCCATCCACTGCCCCCACTTTTCAACTTCAAACAGGAGTTAGCTGGAGCATCACCTGAACTGATCAATAGGCTCATCCCAGAGCATATTAGGCGGCAGATGGGTCTCAGCTTCCCGCATTCTGCCGGTTCATAGATGCAAAGGGATAATGAAACGATGAGTCAACCGATATAGTGATCAATGTGAATCAACAGACAGGCTGTTTGTGGCCTATATATAACTTTTTCGTCCCCCTTGTGAAGATGTATACATGTGCTTGCTGCTCGGCTAAGCATGGAAGTTTGTGATTCTGTCTAGTATTTCATTCTAGTTAAAGCATACTTATCCCTGCATCTGTATATTGTTTTGGTCAGATTTCAGAAAGCTAGGAGTACAAAATG…
Gma.3301.1.S1_at	BE610438	At4g02600	0.001	Signal Transduction	Unclassified		AAAAGCTGATGGCAATCCTGGCCAAGGAAGTTCTCAGGAGAGTGCTAATACAGGAATCCAGCTTGNGTCAATTNTCAAGAAGGCATCTGCTCCAGGANGCAGTTCTTCTGCCACCAAAGCTGATGGGACCAACTCAGTGTAGCCTATAGAAGTGAAGATNTANNNNNNNNNNNNGTNNNGTTGCTCACAAATTGCAGTTTTCTTTATATTATTTTGTTTGCTAACAGTGTAGCATTGTGGGACATGTGTTTGACTTGGTGTAGGCGTAAGGTCGAAGTTCTATATGAGTAGATGCTAGTAATGCCATTGGCATTTCTAANNNNTAAGATTCGTCATCACCTCCTTACTACACTCGTCCTCCCTCAGGTTTTTGCCTCTGATACTTCCGTAGACAGGCTG…
Gma.13815.1.S1_at	CD406399	At4g22140	8e-72	Signal Transduction	Unclassified		ATAACCCGGATGATCTCATGGTACAATGTGAAGGGTGCAAGGATTGGTACCATCCTGCTTGCATGGGCATGACTATTGAAGAAGCAAAGAAACTAGATCATTTTGTATGTTCTGAATGTTCATCTGATGATGATATNAAGAAACCCCAAGCTACATTTTCTGCATCACTGGGAGCTGATGGCAAGGTGGAGCCAAAGCGGCGGAAGAGATGACCATAATGCAGTAGTAGTAAACATGTGAGGTGTGTTTGGCTCTAGCTGAATTTGGCTGGCTCTATGGTAGCTTTTGTGTGTTGTACAGCTTCTTCTAGAGGCTATAAACATTTCATGTATTTGACTCAGGTTATGTATCTATCCGTGTTAGATTTTATCATGACATTCATCTGTTTTTCA
Gma.10361.1.S1_at	BG508532	At4g33080	6e-67	Signal Transduction	Protein Kinase		GTCAATCTTTTGGTGATTCCATGCAAGAGTATGCTTCTAAACGGGCAGCTGAAGANACAAGTTTACAAATGCTTGCATCCTCTGGAGATCCNATGGTNCCATANCTTTGTGCAAATTGAANNNNGTCCATCNTNNNGTTGNGTTTTTGTGTACTTGCTTTGGNTTTAAATATTNGGCCNAGAACATNNNNNNNNNTNNANTNNNNTTNNTATNNNNNTTGCAAGAACAATGTGTACAGCAAGTAGTTGAACAGCATTGTCAAAGCTTGTAGGGCAACNCCGNGNGTNTGTATTTGAATTTTCAACTTAGGAACTGAGAGTTGTGCGACNGAGTGCTCCTGTCCTGGCTGCCCAGGTTGGCTGNGGAAGACTTGCCTTCTCTAGTGGCAGTTGCTGGTTA…
Gma.10038.1.S1_at	AI856357	At2g45590	2e-08	Signal Transduction	Protein Kinase		CTTTTGGATCTTGTTGACACTTCTATCCATTCCTTGGATAAGGAGCAGGCGCTTCTCTGCATCACCATTGCCTTGTTGTGTCTGCAGAGGTCCCCCGGGAAGAGGCCTTCCATCAAGGAGGTTGTGGGGATGCTTAGTGGGGAGGCTGAGCCACCACACTTGCCGTTCGAGTTCTCACCATCACCTCCCTCGAATTTCCCATTCAAGACCCGGAAGAAGGCTCGGTGAGTGTGTGTAATAATTAATGGTTGTTCTTGTCATGATCATTAACTTGTGAGAGTGTATGGTTTTAGTTTTAGGTAAACTCTAATTATTGATTTTCTTCATCACCAATTTGTAG
Gma.11182.2.S1_at	BU080899	At3g21220	1e-54	Signal Transduction	MAPKK		CTCTTCCCTCCTAGTATGATGGATCCTTCNACATGCCTATTGNCTATTGCCTAGCTAGCTAGCCCTGTGTGCCGCTTTATTTTCATTTTCATTTTCATTTTCATACAGAATCAAATCTTAATATTGGATTTTCAGCCATACATTACAGTGTTTTTCTTCTTACCATAANANNNNNNNNNNNNNNNNTCCATTCTTTTTCTCTTTTAGTATTATTATCTTTTTCAAGCCCCCTCAGCCTCAGTCCCTGGTTATTATTGTTATGTTATGCCAATTGCCCAGTGAGTAGTACGGTTATAACCTGCAGGTGCCTTTTCTTTCTTGATTTAATCATCTTCTTATTTAGAGCTACATCAC
Gma.11015.1.S1_at	CD398110	At1g53730	1e-150	Signal Transduction	Protein Kinase		ACCCTGTGAAGTCCCTTTCTCGATTTGCGGATGTTATTGCTCTNTGNGTTCAGCCGGAGCCGGAATTCCGACCACCTATGTCAGAAGTGGTTCAAGCNCTGGTTCGNTTAGTGCAGCGNACTAACATGAGCAAGAGGACGTTTGGAACTGATCAAGGAGGATCCAACAGAGGGGGTGATGANNNNCAAGATACACAAGACATGTAAATGGGAACAAAANNGGCTTGTGTTGATANAATGGCAGAAAAGGAAANTNATATTCTTCAGATTTTTATCANTTCTTTNTAACCCCCTTCAGNCANTTTNTNTNCTGAGTTAGANGGATTGCACCTTTGATTATTNAANGCTAGANNCAATTTNTTGGTGTATGNTTNTGNGCTATTTCTTNTATTGGTGNTAT…
Gma.11001.1.S1_at	BI969749	At5g53140	1e-90	Signal Transduction	Protein Phosphatase		GAAGCAGTTTGTAGTAGCAGAACCTGAGATCCAGGACCAGGAGATAGATGAACAAATTGAANTGNTTATTCTTGCAAGTGATGGACTCTGGGATGTAGTACANAATGANGATGCTGTTTCTCTTGCCCGCACGGAAGAGGAGCCTGAGGCAGCNGCACGAAAGTTAACAGAAGCAGCATTTTCTCGTGGGAGTGCAGATAACATTACATGCATTGTGGTGCNATTCCACCATGAGAAAGCAGAANTAGCTAATCCTGANAAAGCAGAANCANCTAGTNCTCAGCATGAGTAGATGATGTGAAAGCACAAAATGCANGTGTTGGTTATATTCGCGTCAAATTGAATGAATTGAGGTCAGCANNTGCATGATGGNTCACTCTGCATGNCANNAGGCAATTT…
Gma.11006.1.S1_s_at	AW706204	At2g25090	5e-08	Signal Transduction	Protein Kinase	AtCIPKs	CGGTGGCGGAGTTTACTAAGTCTGCCNNANATACGTTGGAGTATGTTAAGTTCTGTGAGGAGCAAGTGAGGCCTTCCCTCAAAGACATTGTTTGGAGCTGGCAGGGTGATTGATACTAATAATAACTCCAACAGTAGTTACTAAGTCATTTCTCATTTCTGTGTCTTTTTTTTTTATAGTACTAGTACTTTCTATGATCCATCATGGTCGTGGTTTAATTTAGTTTGTCTTTGATTTGCTTAATTTGATTTCATACATACTATGTAAATTTGGACTGTGGAGTTTGTGACGGTGTTTGATTTGAATATACTACACTACAG
Gma.1400.1.S1_at	BE823695	At5g25110	1e-22	Signal Transduction	Protein Kinase	AtCIPKs	AAGTCAGACCTTCGCTCAGGGATATTGTGTGGAGTTGGCAAGGGGACGCTAATTGCCACCAGTAACTATTCAATTCAATTTAGATTATTGCAGCATGTAATAAATATCTGGAGTTTGGGATGTTGATTGAACATAATAAGAATTAAGAATCATCTTGATTGACCCTTCTTAGTTCTTATTATTTCCTCCTCTTAAGNTTATGACTTTCTGTTGTATTTCTTTTTAAGATTAAGAGTTAAGACAGAGGACATCCCGTTAATCTGTATGATGTCAGAATTTGTTCTATGCTAGACTACTCGATCTGGTATTTCAGATTGTTCCTGCAAAACGGCAAAAGAGATTGCTAAATTGGTATTACAAGTCCAAGCCAATTACTATTCAAAAGAGATTGGTAATTTG…
Gma.1444.1.S1_at	AW350114	At5g21170	4e-84	Signal Transduction	Protein Kinase		CTTATAGTCCTTCCACCAGGTATATATCATTACAGGTTCATTGNTGATGGTGAAGAGAGATTTANNCCAGAGCTNCCNAATGTAGCTGATGAGATGGGNCATGTCTGCAATCTTCTTGATGTTAATGATTATGTGCCAGAAAACCCNGATGGTGTGTCNGAGTTTGAAGCACCACCCTCCCCCGAATCCAGNTATGGCCAAGCATTTCCAGCTGANGAAGANTTTGCAAAAGAGCCNATGGCNGTTCCTTCGCANCTGCATCTTACTGTCCTAGGTATGGANAANTCTGACATAGGTTCCTCTTCAAAGCCCCAACATGTTGTGCTAAATCATGTCTTCATAGAGAAAAATTTGGCCTCAAAGTCTGTTGTTGCCCTGGGACTCACTCACAGGTTCCAG…
Gma.17291.1.A1_at	AW310967	At2g43290	0.0003	Signal Transduction	Calcium Binding		GCAGATAGCAACAACGACGGTCGTTACGACAAAGATGAGCTGAAGCATGCTCTCAAGGGTTTAGGTGCCATCCTCCCTGGGTGGAGAGCCAACCGTTGTTTTGGAAGGGTTGATGCCAACCACGACGGTGAGATTAGTGGCGCTGAAATTGAAGCTCTCCTTCAATATCTCCGTTCTCATGGGTATGGAAAATAATCATCACTTATCTGTGTGTTGTCTAATCATATAGTACTACAAGAAATTCGCGTAGCGAGGGTCAGTTCCGTCGCTAATCCCTCGTGTGTGTTGTGTAATGATATAGTTTGCGTGTGTTTGTGTTTATGTATACCCTGCATGCCTATACAACTAACGCTGAAGAGGGAGGATAAATCTTCCTGCGCATGTTGTGCTCCCTGGATA…
Gma.16954.2.A1_at	BE822903	At2g40116	6e-31	Signal Transduction	Unclassified		TGCTCCGCATAGAAGTTCGAGAGAATGATAAGAGTCAGAAGGATGACTTTGGTGGACAGACATGTTTGCCTGTCTCAGAGCTAAAATCTGGATTCCGATCAGTCCCTCTCCATGATGAAAAGGGTGACAAATTAAAATCTGTGAAGCTTTTGATGTGGTTTCAGTTTAGATGAATTATAGGATCAGCCATATAATAATCTTAGATAATGGATATGAGGTCATTGTAATGATAATTATATTTATCTTTAGCTGCTTGCAATGGTATTTCTGGCTTTACT
GmaAffx.85565.1.S1_at	BE611082	At1g76040	1e-29	Signal Transduction	Calcium Binding	Calcium Dependent Protein Kinase	AAGAATTCATCACTGCCACCATTAACCGGCATAAACTAGAGAAGGAAGAGAATTTGTTTAAGGCTTTTCAATACTTTGACAAGGATAGCAGTGGATATATAACAAGAGATGAGCTTAGACAAGCTTTGACTGAGTATCAAATGGGAGATGAAGCGACTATAGATGAAGTCATCGACGATGTTGACACTGATAACGACGGGAAAATTAATTACCANGAGTTTGTGGCTATGATGAGAAAGGGGATCCTGGATATTGATGAGAAAGAGAAACCACAATAATTGTGTGATGTGACATGAAGACAAAAGTGGNNTCTGGATTTTTCTTGCTGATTTCTGCTGGGGATGAATTATCACTCTTGAATTTGTCAACTTGCATGTGTGTGCTTAATTCATGTAAAAT…
GmaAffx.92166.1.S1_at	CF806313	At5g19120	5e-21	Signal Transduction	Unclassified		CACGCAACACACCTTCATCTTCTTCCCTCACCACCCCTCACCGTTCCCTTCAATGCTTCACTGCCAAAACCCACAAA
GmaAffx.91570.1.A1_s_at	CF807732	At1g22920	2e-99	Signal Transduction	Unclassified		TGGGTGAATACACTGTCGTCTTCTCCTCTGTTGGGCAATGGAGATTATGTTGCTGGACAAATCTCTGATTTAGCTGAGAAGCTAGAACAGGCAGAGAATCAGTTGGCACACTCACGCTTTGGGCCACTAATAGCACCCACGCCTAGAAAGAAAGAGGAGGAATCTCCACTTGCTAAGATTACTCGTGACAGCGCANAAATAACTGTGGAGCAAGTGCATGGTCTAATGTCGCAGGTCATCAAGGACATTCTGTTTAACTCCGTTCATCAAGCAAACAGAACTCGCACAGAACCATCTGGTCCCGAACCAATGATTGAAAGTTGATTCTGGCTCAGCTAGACATG
GmaAffx.92212.1.A1_s_at	CF807937	At5g49330	1e-53	Transcription	Transcription Factor	MYB	TTGTTGTTGCCACCATCACTTGCAGCCTCTTCTTGAGGATTCTCTAACATTTTGTGTGTGTCTGTGTCTTCTGTTCCTTGAATTTTCAGCTTTTTGCTTAGATGGGTGTTCCAGTAGTTCTTTATTTCATTGTCTGTTCTCCCTGGTAACCTTCCTGCTATGAGGGACCATCTGTTTCCCAAAAGTGAATGCATTCTGATTATAAGATCATCTTCTTCTGGTGCTATGTTCCCTCTCTTTATGTCTGGTCTCAGATAGTTCATCCATCTCAATCTACAACTTTTTCCACATCTAAGAAGCCCTGCTTTTTTGGGTAGTGATTTCCATTGGCCTTCTCCATGAGCTTGGATATACTTGGTAAGCAATGCATCTTCTTTAGGAGTCCATGGACCTTTGTGC…
GmaAffx.93436.1.A1_s_at	CF809161	At3g16770	3e-24	Transcription	Transcription Factor	AP2/EREBP	GTGATAGTGGGCGAGCTCGTAAAAACGTGTACAGAGGAATCAGGCAAAGGCCATGGGGCAAGTGGGCCGCGGAGATAAGGGACCCACACAAGGGTGTTCGTGTCTGGCTCGGCACCTTCCCCACCGCCGAAGAAGCCGCCCAAGCCTACGACGACGCCGCCATACGCATCCGCGGCGACAAGGCCAAGCTCAACTTCCCGGCCACCACCATTTCCGCCGCCGCCGCCGCTCCGCCACCCTCCAAAAAGCAACGCTGCCTCAGCCCTGACATCATCACTGAAGAAAGCAGCAGCAGCTCACATTCCACCACTGGATCCACCGGCGAAAGCGGCGGAGGAAACGACGAACTCGACCTGAAACAAATTGAATGGTTTCTAGGTTTGGAGAATGAGCTGCCTG…
GmaAffx.86401.1.S1_at	BG511450	At1g20980	4e-21	Transcription	Transcription Factor	Squamosa Promoter-Like	GAAACAACAAAGTATGGCTGCCTTGTGTATAGAGATTCTGACTTGAATGCTGCATATTTTCTTTAATTCCGGAGTTTAAGGATATAACAAGCTATACCTGAATGTTTATCGATTGGTGTTGGAAGTTCTGAGTTTNNAATGTTTCAGCTTTTTTGGCCAGATTAAACTTGACATCCCAATATAAGTTGGAATGGAAGGNNGAATTGTGGCCACAAANCACAAACAATTATGAAAGCAGTAAGCATTNGGAATAAAGAGAANTGTGGTGAGTAAATGTTGGTTATTNNTGGTGAAGGTCAATACNTGGGNTCGTTGCCTCCTTCCCAACACGATAAACCAATAAAAGTTCCATGCTTTATTTTTCCNNTTAATTGTTNTGTTATTTTANNTNAGTCAAAN…
GmaAffx.83888.1.S1_at	BM527789	At2g28710	7e-22	Transcription	Transcription Factor	Zinc Finger	CACTTTGTCCCTTTTCATACATTCACATATTCATTTTGCCACACCTTAAAACCAAGCACCCGGCCATATTTCAATTTTTGTTTTGGTTAGTTGTCATGAAGAGAGAAAGAGAGGTTGATAGCTTAACCATGGCGAATTGTTTGATGTTGCTTTCTCGTGGAAGTGAATTTGAGGCCACCTACTCAAGCACTT
Gma.17011.1.A1_at	BE821059	At2g34450	1e-07	Transcription			AGTTGAAACTAGTTGTACATTCAGTTCTTGTCAGCTCCTTTCTGTCCTTGTTGATAATTATCATTTCTGTGTGTCATTTGTAAAGTATATTAGTTGTATTAAGATGGTTAAAATGGCAATCTGGGCGTATATGTTGAGATATTGAATCCTTAGTTAAACGCT
Gma.17432.1.S1_s_at	AW277783	At3g22320	5e-91	Transcription			AAGAAGGACAACTCCGGCGACCAGATCTACGTCTTCTTCCCCGACGAGCCCAAGGTCGGCGTCAAGACCATGAAGACCTACACCAACCGCATGAACTCCGAAAACGTCTATAGAGCCATCCTCGTCACCCAGACCAACCTCACCCCCTTCGCCCGCACCTGCATCAGCGAAATCTCCTCCAAATTCCACCTCGAGGTCTTTCAGGAGGCCGAACTTCTCGTTAACATTAAAGAGCATGAGCTTGTCCCCGAACATCAGGTTCTCACTGACGCCGAGAAGAAAACCTTGCTTGAGAGATACACTGTCAAGGAAACTCAGCTACCTAGGATTCAGGTCACAGATCCTGTTGCAAGATATTATGGATTGAAGCGTGGACAAGTTGTCAAGATTATCCGGCCA…
Gma.17473.2.S1_a_at	BG237175	At2g40140	1e-125	Transcription	Transcription Factor	Zinc Finger	CATTGATTAAGCAGCACAATTCTTTTTTATAT
Gma.163.1.S1_at	AB029269.1	At3g06490	2e-17	Transcription	Transcription Factor	MYB	TTGATTCTTGACCTCCATTCCCGTTGGGGCAACAGGTG
Gma.16641.1.S1_at	CD413090	At4g16780	1e-33	Transcription	Transcription Factor	Homeodomain	GCTGTTTCGTCCTCCGCCGTTGGTTCTGCCACGCGTCATCATCCCATGGCCCATGCCCATGCCCATGCTCGGCCCATGCCCAATGGCCCGTGGGCTTCCGCAGCTCCCATTCCACACCGGCCGTTTGATGCTTTCCACCAATGATCTTGAGGGTGTTTTGGTCATTGTGAATTATTATTATTTACAATTATGGGCCTACTTGTACCACCGTGAATGTGTGTACCCCAAAAGAGAGAAAATATTGGGAGAAACAGTGAGGGAGCGGTTGAAACAGCATGCTGTGGAATTGTGCGTGTTCCAAAGTGCGGTGCGGTCTAAGGATATGGTCATTAGAAGAAGGGATTTGGTGGGTCTCCAATGTTTTGTACCAGTTTGACCCATCAACTTTTGTTTTGTTGG…
Gma.16588.1.S1_at	BI970269	At2g42280	1e-08	Transcription	Transcription Factor	Basic Helix-Loop-Helix (bHLH)	AGACGCTTTCAGATTGTCATGCAAAGTGTACGTGTTCACACGAGAAGCAACAATAACGGCAAAAAGGGAGATTGGTCGACTTAGTTTGTGTTTCTATACCCCGTTGAAATTGAAAAGCTTGTTGAGTTCAATGCTCCAGAAGCAACCAATTCTTGCTATTGGGAAAACGTGTGTTTAGGACTTTTCCCATACACTTAGTCTCTGTAGTCTGTACAGATTAGTAATNATTTGATGATCGCCTAGCTAGAAATCTAGATTGCCTTTTCTCTATTTCTGTACTTAGAAAANTACATTTAATTGTTTGGCCCTTCGTGTATCCAAAATAAAG
Gma.16613.1.S1_at	BU760651	At5g04340	2e-35	Transcription	Transcription Factor	Zinc Finger	GGATTCTTGTTTGCCATTGATTGAATCTAACAATTGTTTTCATCANNAGTAATATTTATGCCAAAGATAAATATACAGGTT
Gma.16623.2.A1_at	BG157524	At3g20770	0.0002	Transcription	Transcription Factor	Unclassified	ATCATCATTATCATCTATCATGGACTCTTTATTTTCCTTCCAAAAGGGTTGGCACCCCTGATCATGTGAAGTTCCTTTGGCCAAAAAAGGTTTCACTGCAATTTTCTTCACATGTAATCCTGTAGGCCTAGTAGAACTAAATATTTTAAGCTTGGCAGGTCTAGTATGTGTTATATACATAACAATATATAATAAAAACTTGCATGTTACCATTATATGTAGCTTTGTGATTGTGTGTTTCTATATCAGTGTAGCCATCTTGTTACTTAAATANNTTTCTTATGTTAGACTGTGATATAAATAAGATTTGAATTTCTCTTCTAAATTTTATT
Gma.15184.1.S1_at	BM522992	At2g22800	1e-61	Transcription	Transcription Factor	Homeodomain	AAATCTCCGGCCTCGACAAGTTGAAGTGTGGTTCCAGAATCGGAGAGCCAGAACAAAGCTGAAGCAAACGGAGGTGGACTGTGAGTTCTTAAAGAAATGCTGTGAAACATTGAAGGACGAAAACAGGAGGNTAAAGAAGGAGCTGCAAGAGCTGAAGGCACTGAAACTAGCTCAACCCTTGTACATGCCTATGCCTGCTGCCACACTCACCATGTGCCCTTCTTGCGANAGGCTCGGTGGCGTTANCGATAACGGTTCGAATAAAAGCCCCTTCTCCATGGCTCCCAAGCCTCACTTCTATAACCCCTTCGCCAATCCTTCNGCAGCATGTTGATTATTGTGGTTAGGTTTTCACTNTTCNTNNNNNNNNNANANNNNAAAAAGNCAAGAGTTATTTCC…
Gma.1538.1.S1_at	AW351115	At4g27000	1e-40	Transcription	Transcription Factor	Unclassified	TCCTGGCTATGCAAATTACCAACCACCCCAGCAACCGCAGCAAATAGGATATAGCTAAGAAGTTGGGCCCCAATTTTTCCGATTTCTTCTGTAATCCTATGCTATGCTATGCTCGTTTTGGTTGCTTCTCTTTTATTGTCTCGTGGAGAACAAACTTGCCTCATCTTTTCTAGTTTCTTATGATTACTAATAGCATTTACATTTTATGCGAATTTTATTTGTTTGCTGAATACTATTTGGTGAACGTTATCACATTTGATTGTTAT
Gma.14100.1.S1_at	CD408988	At1g24580	2e-18	Transcription	Transcription Factor	Zinc Finger	TAAACACGGTTTTCTCAGTGGCTTTGTTGAAGAGCATGTTTAGATCCATGCTCCAAGTAGTGTTTGGTGGCAGTGCTGCTAGTAGTTCTTCAAACATTGAACATGATGATGAAATTAGTTCATCATCATCATCACGGGAAAGGAGGGTGTCAATAACTCANTACAAGTCATTGNGCCACAGTCATGACATAGGAGGAGGAACAAGTGTGGCTATGGTGGAGTGCTGCGTTTGTTTGTGTCGTTTTGAAGNCAATCAAGAGGTTAGTGAGTTGCCTTGCAAGCATTACTTCCACAGAGGTTGCTTAGACAAATGGTTTGAGTTTGATAACAAACACAGCACTTGCCCCTTGTGTCGTTCCATCGACTAGAGACATATACNAAGGTTAATTAGTTTCAAAT…
Gma.15654.1.S1_at	CD401214	At5g15020	3e-20	Transcription	Transcription Factor	Unclassified	GTTCTCTAACATCTTCTAAAACAGCTGAGACTCAAATACATANATGTNNGAGTCTTGGTGTAGCAACCTAGGAACCCTTTGGGTTTACAATTTTATTTGTTGTCATAGTACTTGAATTTTCACATGAAAGTGGAGGAAGGGAATATAGAGATGGGAGTGTGTAATGCGTTTATGAGGTCTCATGCGTTTTGCACACTCCTTTGTAAATAGTTTGCTTCAATATATTTGTAGAAATATTGTTTACCAAATTGTTTATTAGTTGCAACACAGTTGCTTCCTCCG
Gma.1124.1.S1_at	AW757129	At3g20310	6e-31	Transcription	Transcription Factor	AP2/EREBP	TCTCCGAGGTCCCAAGGCCAAAACAAATTTCCCCCCTCTCTCACCTTTTTGCTATCCACACCCCACCACCNATCCTTTCTTCTACACTGGTTTCCACGATCAACACCACCACCACAACAACAACAACCTTAACAACCCTCAAAGACCCACTTCAAGTGGCATGAGTAGCACCGTTGAGTCCTTCAGTGGGCCCCGCCCTCCCACCACCACCACTACCACCACAATCACAACTGCGACGCCGTTTTTGACTGCTACGCGGAGATACCCGCGCACTCCCCCTCTTGTCCCTGAAGACTGCCACAGTGACTGCGACTCTTCCTCCTCCGTCGTTGACGACGGCGACGACAACATCGTTTCGTCGTCGTTTCGACCTCCCTTGCCGTTTGATCTCAACGCGCT…
Gma.13174.1.S1_s_at	CD414686	At2g33310	2e-22	Transcription	Transcription Factor	AUX/IAA	AGGATCAAATGGTGAGGATTATGGCATTATTATCGGAGGAGAAAGACATTCAAAATTGTTGGATGGATCTTCCAAGTTTGTGCTCACTTATGAAGACAAGGAAGGAGATTGGATGCTTGTTGGGGATGTTCCCTGGGGGATGTTCCTTAGCTCGGTGAGGAGGCTAAGAATCATGAGGACATCTGAGGCTAATGGACTTGCACCAAGATTGGAAGAAAACATCAAACAGAGATGCAAGCCCATATAGATACTGTTTTCATGGCTAAGGACACGAAGAACCTGTCAAATAGATGAAGAGNAAAAACNGAANCAGAAAAGTAAAGGAATATTGCAAGTATATGAAGTTTTGAGATTTGAATGATAAAATCTCGCACTTTTGTTTAATTAATTCAGTTTGTT…
Gma.12646.1.A1_at	CD393601	At5g63110	8e-33	Transcription			TTGTTATCTTTATTCCGTTTATGGGGGAGATCATTACTAAACAGTACCACATGCAGCTGTTGAGAATGCAAATATAATCAATACATTGTGCAAATGTAATATAGTGTAAAACATTGTTTTGGTCTCNCTCGTAAACTATTTTTGTTTAAGTCATTTTCTTTTATTTGGTCCCTGGCTTACACTTAGTTTCGTTTTAGTCTGTCATGGTCAATTTAGTTGATTTTGAATATTCTCATTTGTGCATACTTTCATTTGGTCAAATGGATACATCACTTTAATTTGGTTCTTGTATCTTTTGCC
Gma.1270.1.S1_at	CD405147	At1g10200	3e-85	Transcription	Transcription Factor	Unclassified	GTGACTGTGAATGGAACCCCTTACCATAAGAGTTGTTTCAAATGCTGCCATGGAGGGTGTGTTATCAGTCCTTCCAATTACATAGCACACGAGGGAAAACTCTACTGCAAACACCACCATGTCCAATTGATCAAGGAGAAGGGCAATTTAAGCCAACTTGAAGGTGACAATGAGAAGAGTGCAACTAATGGGAAAATCAATGGTGAAGAAGTTGCCACGGAGACATGATGAAAGAGTCGAGTCTCAGAATTGTNCTTTCTCAAGTTCCATATTTGTGCACCATATGTTTCTGCTGTCTCTCATGCTTTTACCATTACTTTGCAGTCCGGGAAGCTCTTTACCCGTGACAAATATGGTATTCAATTTTTTGTTAGTTGAACTGTGTGGATCTTCATCATC…
Gma.1187.1.S1_at	AW350683	At1g78080	3e-48	Transcription	Transcription Factor	AP2/EREBP	AAAGGTGCCAGGTCAGCGAAGAAATCGAAGCAAGGTCCGAACCAGGAGGCCAAGCCCGAACCTCAAGCTTCCGCTGAAAGTGAGGGTTCTGCGGATTCTTCTCCGCTGTCTGATCTTACCTTTGATGTAACCGAGCCGCAATGGGAACATTTTAATTTGCAGAAGTTTCCTTCTTATGAGATCGATTGGGATTCTCTCTGAACTTCGTCTTTGTTTTTATGTCTAGTCTTGTGGCTAATAATAATAATAATTTAGGTTAGTCTTGCTAGGTGGCTGCTGCAATTGAGTTTTTGAAGATTGCAGTGCTTCTTGTAGGATTTCGATTTTTTTTTTTTTNAGCATTTGGTTATTGGCTATTTGGTCAATATGATGTAAATCTCTCTACCTTGGTCAGCTGGG…
Gma.3887.1.S1_at	BI970809	At2g17250	3e-78	Transcription	Transcription Factor	CCAAT	AGTCAGGTGCTATGAGGAGTTCTCTTTGGGAAATTGATACTATTCTTCACCACTACTGTCCTCCTGCCTCACGGTTTGCTTTGTCTCTTGGGAATGATTTGACAGTCAGGGCNAAAACAACTGAAGTTAATGTTGGTGATTTTAGTGCTGGTTCATATGCAACAATCCTTGGAGCAGAGATATCNCGGAGGGTAAAGCAGGTTCCCCTAGCATTCTTCAAAGCAACTCCTTCCTCTTTATTTTCAGAGACTGATTTTGCTGGTTGGACTTTCAAATGTGAAGAAACNCCCAAAATGATCAATGACANNNANGANNNCNCTAAGNATTTATCGTAACATGAATGNTGTTCTGTGAAATGACNCANCANAGTGCTCACCATTCATTGTTGTCCATCTCGGA…
Gma.3176.1.S1_a_at	BU549115	At1g07470	5e-23	Transcription	Transcription Factor	General	AACAACGATAATGTCAAGTTTGCTTTTCTTGGTTCCAACATGATCTCTGAACTTTAGCCCAAAAAGTGAAAGAAAACATGACAATTTCAGGAATATGTTTTCTACATCAGCAACGTTCGTCATTTCTTGT
Gma.2533.1.S1_at	AI416735	At1g14920	1e-179	Transcription	Transcription Factor	GRAS	TCCGTGTGGCAACTCGCTACAAAATCGGTGGTTGCTGCTCACTGAGTCGACTCGCCGATTCCTCAGCCAGCTTTTTCTTTTTATTTTTTGTTTTAAATTAATTTCTAATCATGCCCACCGAAAAAAAGGAAANAAAAAAAGAAAAGAAGGGGAACTTGAGGGGGGATTGAGAGGTCAGTGTGTAATTGTGCTATGCTGAGCTGTGAGCACTGATTGCATGAGCCTGAGACCCACCATTGTCTATTTTCCTGCCCCAACTTATGTCTCTCTCCAACCCTTAATTTACTTATTTTGCATTTGCCGCATTTGTAAACCTTGATTTTATTTTACTTGGCTTTCTTTGGGNGATGGNGTTGGGNTGGAAATCTNNTTTGTTAATATTTTCACGGGTGTGTGGAA…
Gma.2702.2.S1_at	AI855587	At5g13180	3e-80	Transcription	Transcription Factor	NAC Domain	GCATGAGTATCGCCTCAACATCCTTAACGCCTCTCAGAGCCATGTTCCCATGGAAAATTGGGTTCTATGTCGCATATTTTTGAAGAAGAGAAGCGGTGCTAAAAATGGGGAGGAGANCNACAAGGTGAGGAACTCTAAGGTGGTTTTCTATGACTTCCTAGCGCAGAACAAGACTGATTCCTCATCCTCGGCCGCCAGTGGAATTACACATGAACATGAATCAGATGAACATGACCATGAAGAGAGCAGTAGCTCCAACACCTTCCCTTATACTATTAGAACGAAACCTTAACAACCAAGTCAACAACCACCTTCCTTAAAAAGTTGATTATCACCTAGTTTTTTTTTTTTTAATTCTCTTTCCCTTTCCCTGTAATCATCATCAACCACTTGTTGAAA…
Gma.2342.1.S1_at	Z46953.1	At4g36990	4e-65	Transcription	Transcription Factor	Heat Shock	AGTGCGATGAGCTCGTGGCTTTCCTCAGGGACCGTCTGATGGTGGGTCCCGATCAGATCGATCGCATCATGCGGCAAGGAAGTTGCGGATCTGAAAACGTGGTAGGTGAAGGCGGTGGAGGAGACTGTTTGAAACTGTTTGGTGTTTGGTTAAAAGGGGATACGCTAACAGACAAAAGAAACAACCACAAAAGAGGCCGCGAAGACCAAATGGGCTTCGGTGGGCCTCGCCTCAAGGAGTCAAAGCCCGTTGTTGACTTTGGAGCTGTAAATATCATGATGAAGAGCAACAGGGTTTGCAACTGAATGAGGCTCTCACCTCGCCACGTAATCTTTTAAGCAATTAAAGAAGGAATAGGATAATGATTAGTGAAAAAAGAAAAGGCTAAGCGATAATTAT…
Gma.2258.2.S1_at	BG237280	At3g12860	5e-89	Transcription	Chromatin Modification		AATAAGGGCAGAATGGCTCGATATCTTGCAAACAAATGCTCAATTGCATCACGGATTGACTGCTTTNCTGAAAGGGGTACTACTGTTTTTGGGGAGAAACTGCGTGAGCAAGTTGAGGAACGACTTGACTTTTATGACAAGGGAGTTGCCCCTCGCAAGAACATAGATGTCATGCAGGCTGCTATTGAAAGTGCTGAAAACAAAGATACAGAGATGGAAACAGAAGCACCTGCCGAAGTTTCAGGCAA
Gma.2175.1.S1_at	BM731839	At5g61890	7e-24	Transcription	Transcription Factor	AP2/EREBP	AGGGTTTCCAAATCTTGAGGAGTATGCAAGGTTGCTGAGTTGTAGCGATGATGATGATTTTCAACGTGTTGCATTGGGGCTCTACCAGCATCACAATAATGAGGATTTTATTTGTGGTTCATCACAACCACCACCAGTGCCGTTTTTTGTGTCCTCTTCTTCTTCTTCTTCTGCAATGACATCGTCATATTCTGATTTTTTGGGCCAAGGAGGGAGTACTGGTTTTGATGAAGGGAACAAGAGGGGGTCGTAGTTTTATGTCTCTGAATTTTGAGCACTGCATGCAGGTTGCTTCCACAACAATTAAGGAAGTTCAAATCTCTCATCTCTTATATGTTCTTTTGTTTTTATTATTCCAATTACAAAATAACACCTGAGGTATAAAATCTATAATACTCA…
Gma.18028.1.S1_at	BE608556	At4g34590	3e-26	Transcription	Transcription Factor	Basic Leucine Zipper (bZIP)	GGTGGGTGAGCTTAGTCACAGGTTAGAGTCTCTGAATGAGATCGTTGACGTGTTGAATGCCACCACTGTGGCGGGTTTTGGAGCNNNNGCNNCNNCGAGCACCTTCGTTGAGCCAATTAATAATAATAGCTTCTTCAACCCGTTGAATATGGGGTATCTGAACCACCCTATTATGGCTTCTGCGGATATATTGCAGTATTGAGATCCATGGTCTCTGAGTCTGAGATTTGATGAGGATTTCTTCTTCTTCTTCTAGGTTTGAGTCTGTTGAGAAATTGTAATCACTACCATATGGTGATAAGGAATAATAATAATGAATGTGTATCGTAAAACGGATGGGATTGTTGGGTGCTGGTTCTGTAAATGTGGCATGGGCC
Gma.17664.1.S1_at	AW348917	At4g15080	2e-26	Transcription	Transcription Factor	Zinc Finger	GTGAACTTGCCCCAAGAGCCAAGATATAAAAGGGATTCACTTTCAAATCAGCTTCCTGTGTTTGTCCCTGGTGGATTTGAGAATAACCTTCAACCTCGTTCTGGCATGAATTAACTTATGTTGTTTTGAGATTCCAATGAGTGGACAAAGTTTTTGTTGGAATCGAAAGGATAGTGAAGAGCAATTAAAAGAGTCTATGTGGTAGACACGATTTTAGCCTTTAAGACCATACAAATGAAAAGTATGGTGAACAACATCCGACTCCAACAGGTTGTTGTTTATTCGGCCTAATCATCTAGGGTTAACGTGNGTTGTCATCAAAATCCATCTGGGCGTTTGAGAGAATGAAATCAACTTCATTGTTCCATTTGCTGAACATGCCTTGAGAAATGTGAATCT…
Gma.1798.1.S1_at	BE474620	At1g19220	7e-76	Transcription	Transcription Factor	ARF	AGTTTAGATCCTCAAATGTAGCAAGAGCAGTTTCCCTTACACTATTAATGCTACAGATCCTATANCTTCGGAATCAGCTTTTCTTGTGGTTGTTTGATTAGGATTTCTTTTTCATTTTTTGCAAGGGACANCAGNATAGGGCAGCTAGNNNNNANNNNNANCGTTCTGATATAAACATTAATTTTTACTTATCTCTTGTAAATCTTGTCATGGTTAAAGTTGTATACGGAAGTTTGGTGTCNAANNNANNNNNNANAGCCTGAGACAACGAAGAATGCATGCCAATTCTAGCTCTTGTATAAAGTGCCTACGATGTTTCCACGGTGTCCATTATGGATGAAGAAAAACTCAGTTTCTTTTTAAACTCTTCAATTTTGGAATTAATGTGCTTCAATTACA…
Gma.4155.1.S1_at	CD394281	At1g53910	3e-48	Transcription	Transcription Factor	AP2/EREBP	CTAACTCTCAGAATGTGGTATCTATTGAAGATGATTCTGCAAAGACACTCTCTGAGGAGCTTGTGGATATTGAATCTGAGTTGAAGTTCTTTCAGATGCCTTATCTTGAAGGGAGCTGGGGCGATACTTCATTGGAATCCTTGCTATCTGGTGACACAACTCAGGATGGTGGAAACCTCATGAACCTTTGGTGCTTTGATGACATTCCTTCCATGGCTGGTGGAGTTTTCTGAACCGCTTTTTCTTTGGTCTCCCTGTGTGTAAATAAAGCTACAAGTTGTTTTTCTCTGTTTTTGATTTTTGTTGCATTTGTTGTTCTCTTGTTGGACACATCCCCCCATGTGTCTGAAAAAAAAAATGTAATTTCCATTTTTGTTGCTTTCTGGAATGGTTGTCATC…
Gma.4164.2.S1_a_at	BI788296	At5g67300	2e-75	Transcription	Transcription Factor	MYB	GGCGCCGTTTAATTTTAGCGCAGAGTTTCGGTCGGTGATGCAGGAAATGATAAGGAAGGAGGTGAGGAGTTATATAGAGTTGCACAATCAGAATGGGATGTGTTTTCAGGCTGCGGTGAATGATGGGTTTAGGAACGCTTC
Gma.4116.2.S1_at	BM177935	At4g20330	2e-77	Transcription	Transcription Factor	General	AGCTGCAGGGCAGATTTGGCTTCTGTCCAACTTCGATTCACAGGAAGACATTGCCTACCCTAACGACCCCAAAGTACACATTAAGGTGGATGATGACCTAAAACATCTTTTCCGCAGTATTGAATTGCCTCGTGATATGATTGATATAGAGAAGGATCTTCAAAAGAATGGAATGAANNCCNNCTACCAACACTGCACAGAGGAGGAGTGCAGCTCAAATTCAAGGCATTTCTTCCAAGCCAAAGCCTAAGAAGAAGAAGAGTGAAATCAGCAAGAGAACGAAGCTTACCAATGCTCATCTTCCAGAGCTCTTTCAGAATTTAAACAGTTCCTGATTAACTCTCATCAAGTGGTTGTGTAGTTCAAATAGATACTTTATCAGCCAGTCTAAACTAGATT…
Gma.4259.1.S1_at	CD412731	At3g04730	4e-62	Transcription	Transcription Factor	AUX/IAA	TTATTATGTGTCTCTGTAATTTTCTTATATGTGTATTATACGAATGAGAAAATAGTTGGAAATTCGTTAGGGACAAGAAATAATATAGAAGATGTTTATATGATCCCGTTTTTGTTTCCAGGTAAAAATATGTGACTTTGTCCATTCTATTGCCTGCTTAATNATAATGTCAATGTTTCCAGTTTATCTTAACAGGGTTTTG
Gma.4205.1.S1_at	AF464906.1	At5g23090	4e-64	Transcription	Transcription Factor	Unclassified	AAGGACGATTGCACCGGAGCACGTGNTNAAGGCTTTAGGGGTTCTTGGATTTGGCGAGTACATTGAGGAAGTTTATGCAGCATATGAACAACACAAGTTGGANACAATGCAAGANTCTTTAAAAGGTGCNAAGTGGAGCAACAGAGCTGAGATGACTGAGGAAGAAGCATTGGCTGAACAGCAAAGGATGTTTGCAGAGGCACGTGCAAGAATGAATGGAGGAGCCATTNNNTCCAAGNAGCCAGANGCTNACCAAAGTTTAGAGAGCTAACTTTATAGGACACTTTTATTTTCTTTTGAAGCATAGGCAAGCANNNNNCNTCTCTTACTCTTCCCTATGCGNTGTTAATTTAGCTCGATTTTGCACANANCCCCATTCACTAGTTTGCTGGCCTANGT…
Gma.404.1.A1_at	AW348243	At5g66320	1e-13	Transcription	Transcription Factor	GATA	GCTTGGCCCAGGCCCAGACTCAAATGGTTCCCACCTGCTGATATCTTACTTAGATTAGGGNAAATTTGCAGTTTAGGTTTAGGGTATACNAACCCGGTTTGAACCGGTTCGGTTTTTGTATGATATTTAGTGGGTTTTTTAGTTTTAGTTAGTGCTAGGCAGTAGTCACCAGTCAGGTAACCAACCATAATATTAGGAATTAGTAGTAATTAGGCATTGATTGTTTGTAAGGTTGTATCGTATCCC
Gma.4774.1.S1_at	AW310386	At1g01720	6e-86	Transcription	Transcription Factor	NAC Domain	GGCAGGGCAACAGCGAGTTTTCGTATAATTACATGGATGCCACTCTCGGGAATAATCAGATGTCGCCGCTCCAGGATATCTTCATGTACCTCTCCAGGCCCTTCTGAAATCAACACGCACGAGNCGGCANGNNCGTCGTTCTTTGCTTTGTGTGTGCATGATGCATTTTTGACGTGCCTGCTGCATTGCATGGAAGCACGAGACTGAGTGAATGTCCGTGAGTGTGTCCGTGCTGGTGCGCGTAGATGATTATTATTATAAAAAAANAAAAAAACAAAAAAGAGAAGCATTCATATATGAACATGATGAATCCAACTGTTTACATGATCTAGTCGCAATT
Gma.4730.1.S1_at	BI968952	At4g25410	3e-28	Transcription	Transcription Factor	Basic Helix-Loop-Helix (bHLH)	CCTCCATAATTAATTCCAGCCCTGAAGACCATGAGAATTACAAGCATGCATCTAGNGGTTTCACTGTCCACCAGAATAGTGGTGGAGCTGTGGGGATTGAAATCAGTGGATTCAGTGAGGAAGAGGTTCCACTTTCAAAATTNCTTNAACTNGTGTTNGAAGAGNGACTTGAAGTTGTTANTTGTCTTTCAACCAAAGTCAATGGCAGATTACTCCACAGTTTGCAGTGTGAGGTTGACAATTCCGNCAGTGTAGATCTATCTGAGCTGAGAAGGAAATTTTCCAATGTAATTCCATCACTTAGATGTTCTGAGTAACTTTGTGGACTGGAAATTAACACATAACACATGTATCTGCCCTTTCTAACTGGTTCGTAATTTTGGTTGTGTGAGTTTGCTT…
Gma.5885.1.S1_at	CD405440	At5g20570	1e-55	Transcription	Transcription Factor	Zinc Finger	TGGCGACACTGGATTCCGACGTGACCNTGNTTCCGGCCGGCGAANCCTCCANCAGCGCCGGTCCTTCTTCGTCCACCAAGAAGCCGAAGCGNTTCGAGATCAAGAAGTGGAATGCNGTTTCNCTCTGGGCTTGGGATATTGTNGTGGATAATTGCGCTATTTGNCGNAACCATATCATGGATCTCTGTATTGAGTGCCAGGCCAACCAGGCTAGCGCCACTAGCGAGGAATGCACTGTAGCTTGGGGAGTTTGTAACCATGCTTTTCACTTCCATTGCATAAGCCGATGGCTCAAGACCCGTCAAGTATGTCCTCTAGATAATAGCGAGTGGGANTTTCAGAAATACGGTCACTAGAACTTTGATGCGGCTGAGCTACTTCCANCTTGGACATTTGGAT…
Gma.5483.1.S1_s_at	CD414581	At5g28770	7e-33	Transcription	Transcription Factor	Basic Leucine Zipper (bZIP)	GATGAAAGTCCTTCTGAGACATCAGCTGNTGCTGCTGTTCCAGTGCAAGAAGACCCAAATCATCACCTTTGTCAACCCACTTCTAATAATGGGTTGGGAGGCATTTCTTCAATTGAAACTGTGCAGCAGAATGTTGCAGCAGTGGTAGGTGGCAACNAAATGGGGAGAACAACTTCCCTGCATAGAGTGGCTAGCCTGGAACATCTTCAGAAGCGGATTCGTGGTGGTGCAGATTCACGTGGAACTCCTTCTAATTGAGAACAATAACATAATAGCTAAATTTACATTATGCTTTCCATGAGGGAATTATTCCAAAACTCTTGTTTCTGCTAGTTGTAAGTAAGAGCAAATTCTTGTTGACTTGTTGTAAATCAATTTGATGTATGTGAATCTTATTGA…
Gma.5519.1.S1_at	BI967466	At1g01720	4e-21	Transcription	Transcription Factor	NAC Domain	CATTGCACCTAACATGTGATGTGGGCTAGGCCAAGCTTAGCAACTATTCTTATTCTTTGTTCTAGAGAGATGAGGGAATGTTGAATTCGGCTGAAATGGGCTATTTGGATTGGTTCTTGGTGTAAAGAAAAAATGAGAGAAGGAGATTAGGTGCTGCAGTAAGTAAAAAGTAAGTGAGCAAATTGATGATAGGTTATTGGAGGGTTAATGTGTGGGTGTAAGGACTCACTTAGGAAAATTCTTGT
Gma.5076.1.S1_at	BE657174	At2g41900	7e-58	Transcription	Transcription Factor	Zinc Finger	ATACTGAAGCGAGGGATGGCTGCAAAGTACCCGAATGATAATCTATTTTTCCCCCCCCATTATTTTGTCATTCATTGTTTTACTAAAGAGCTTCAGGGGGAGTGGTAAGAAACCCTCTCTCTGGGGTTGATGATATCCCAGTAAAAAAGAAAATATTCTTCCAAAACTCTAGTTTCAGGACTCTTTTCTTCATTTTATTCCTAGCCATGGAAAAACCAAGAGCCTCATATTTGTATTCAAGTTCGTTTTCTTGGTAGGAATCTGCTAGTATATTGCTATGCTATTGCATGTATAGAAGACTAGAGTGTGTTTATTGTTAAGGAATTAGAGGTGATCTGCGCCATTAATATTTATTGCCGGCAGATCGTTTAGACATACTGAAGGCTACTGTGTA
Gma.5274.1.S1_at	BM178426	At3g20770	1e-120	Transcription	Transcription Factor	Unclassified	TCGCGGTCAAGGAATCACTGCAGAAGGCAACATCTTTGATGAAGCTAACATGCCCAACAATCATCACATGTTTGCAAGAGAAGAAGGTCAATTTGACCGTTTCAAAGCTTTGAATGCTCCCTTTGAGACCAATCACAACAACAACAACTTCCACTCAATGTTTGGTTCCCTTTGTGATTTGGCATCATTTGATTTCAAGGAGGATATGCAAGGAGTAGGGATGGATACTCTTCAGAAACAGCCAGATATTTCAATATGGTACCAGTGAAAATGACAAGTTGAATCTGGAAGCTCGTTATCCACATCATGAATTCTTATTTTCATGTGATGTTCCTTCAGCCAAGTCTTACTGGAATTTTCTTCACATGTAATTCTGTAGGCCTAGTAGAACTAGATATT…
Gma.5331.1.S1_at	BI892702	At3g15500	4e-94	Transcription	Transcription Factor	NAC Domain	GGGATGGTGAACTACAACTGCAATGACCTTTATGTCCCTACGTTATGCCACTTGGACTCATCGGTTCCGTTAAAGATGGAGGAAGAGGTGCAAAGCGGCGTGAGAAACCAACGGGTCGGGAATAATAATTCGTGGTTTCTTCAGAATGATTTCACACAGGGGTTTCAGAATTCGGTTGACACGTGTGGGTTTAAATACCCGGTTCAGCCGGTCGGGTTCGGGTTCAGAAATTGAACCGGCTGATGGATTAATAATAGTAATGTTTAAATCGGGTTTATTTGGTGTAAATAGGTGGGGATTCTTTGGGCNTTAACTCGTGGGGGTTTTAGATTCCTTTTTAGAAAAGGGAAGAAGAAGGTGCAAATTTTGGTCCTCATTTTCGGCTAAAGATGGAGGGTA…
Gma.6655.1.S1_a_at	CD396047	At1g59750	7e-07	Transcription	Transcription Factor	ARF	GAAACGAGTATGTACCTGGCAAGCCCTTCATCATGGCCTATAAGGAGCATATGGTTAGTGTATTCTGCATCTATACAGGAGCAGCATAACAGCACCAAAGCAGAGGGCTTGGGGTATTGTGGCTTTTCTCTTTCTTTCATAGCTCTGTAATCACCGAGTTTCGATGCCTTGCTTGTTCAGT
Gma.6571.2.S1_a_at	BE191621	At4g24440	4e-52	Transcription	Transcription Factor	General	GCGACGTTCGAACTGTACCGCAGGTCGACGATCGGAATGTGCCTGACGGAGACGCTGGACGAGATGGTTCAGAACGGCACTCTCAGCCCCGAGCTCGCGATTCAGGTTCTGGTCCAGTTCGATAAGTCCATGACTGAGGCTCTGGAAACACAAGTTAAGAGCAAGGTCTCCATCAAGGGACATCTCCATACATATAGATTTTGCGACAATGTTTGGACCTTCATCTTGCAAGATGCTTTGTTCAAGAACGAAG
Gma.752.1.A1_at	AW432463	At1g68810	6e-08	Transcription	Transcription Factor	Basic Helix-Loop-Helix (bHLH)	AAGACAGGCCCTTGATTCCCTTCCACTGCATCTAGTCAAGGCAGAAATTTCAACTTTGGCAGGTAGAATGAAGAATGTGTNNNTCTTCACGTGTTGCAAAGGAAACATTAATAATATTGATATTGAAAAATGCCAAGCTCTTGCAAGTACTGTTCACCAGGCACTATGTTCTGTGCTGGATAAGGCTTCTGCCACACTGGATTTCTCACCAAGAACATCGCATGCAAGCAAGAGGAGAAGATTATGCTTTATTGAAACATCCACNTCCTCATGCAACCACGGATCTTGTTTGTGCTGATGTCAACAATTTGATGTGTTAATCTTATTTGTTTCTGCAAGTGTTAAAGAGTGTGGTATTAGTATTTCTTATTTGTNGAGGAAAGCTAACAANACACTTGA…
Gma.7462.1.A1_at	CD413745	At1g52150	5e-73	Transcription	Transcription Factor	Homeodomain	ATCTGCAACAGTTATAGGTGCTACTTGGGTGTGGAGCTACTTAAATCTAANAACGAGGGGAATGAATCTTTGCTCAAGTCCTTGTGGCATCACTCAGATGCAATATTGTGCTGCACTCTAAAGGCATTGCCAGT
Gma.7776.1.A1_at	CD399260	At2g46020	4e-41	Transcription	Transcription Factor	SWI2/SNF2	AGGATAACCCTCCACTGCTTGCTCATCCAGGTCAATTGGTTGTNTGCAAGAAGAAAAGAAATGANAGGGANAAATCANNGGGGAAGGGTAGGACTGGATCAACTGGTCCTGTTTCTCCACCTAGTGCTGCTATAAGAAGTCCAGGGTCAGGTTCAACCCCAAAGGATGCTAGANTGGCTCAACAGGGAAGGGNTAGCCAGCCATCTCAACACTCAAATGGGTCTGNTGGGTCAGTTGGTTGGGCAAACCCTGTAAAGCGTTTGAGAACAGATTCTGGTAAGAGGAGACCAAGCCATATGTAGATTTNTTCATGGAGACAAAAGGATGGTATATAATGGAGATATTATTGGTACTAGTTTTTCANGAAGANTTTTAGTGGCCCTTGCCTTTGATAGGGTT…
Gma.7891.1.S1_at	AW310625	At3g07340	9e-09	Transcription	Transcription Factor	Basic Helix-Loop-Helix (bHLH)	TTGCCATGCAGTTATCTCCGCTAGATGTGTTTAATGAAGGTGGCTCTCAGTTTCCATTAGCATTCTTAGAGGATGATCTCCACACCATTGTTCAGATGGGGTTTGGCCAAGCTGCTAACAGGAAAACACCAATACAATCCTCGAGTTTCAACGGTTCAAATAATGTACCACAGATGAAAGTAGAGCTCTGATCAACAAGGACTCACCTTTCATTACGCCTGAATTGAAGCCCAGAAGATTAGGAAGACTACTGTATACAACAACAGAATATTTAATTCCAACAACCCCATAAAATATTATTATTAAGCCATTATTACCATTAGATATATTCAATAGGAGAACCCTTTTTTTTTTCTTTTACTTTTCTCAATTTTTTACCTCCCTTCTCCCTTTTCTATG…
Gma.7753.1.S1_at	BU549977	At5g20910	4e-91	Transcription	Transcription Factor	AP2/EREBP	AGTTGTGCCCTTGATGGTGGATGTAGGTCCTGTAGCTCCAAGAGCCCCTCCTGCCAGTAAAGAGGTCGTGGCAAATCTTCCGGTCATTACTCTCACAGAGGAAATCCTGGCTAATTTAGGGAAAGATGCAGAGTGTGCNATTTGCAGGGAGAACTTGGTTTTAAATGACAAAATGCAAGAGTTGCCATGCAAGCACACATTCCACCCACCATGTCTAAAGCCATGGCTGGATGAGCACAATTCTTGTCCCATCTGTCGGCATGAGCTGCAAACTGATGATCATGCCTATGAGAGCTGGA
Gma.6986.1.S1_at	CD396631	At5g23090	4e-57	Transcription	Transcription Factor	Unclassified	TTGCTGGCCCATGTGGATGTGCTCATTTGTATTCTTTCGATAAATCCATATTTGTAAGTCAATGTAATTAGTGAGAGATCATGAAAACCCTCCCGTTTAGCATTTACTTGTAATTATTTAATTTACGTTTTTGTATCTTCTACATACTAACAACTCCTAGCTTGATTCTGACAGTAGCTACTATGTTAGATTGTAACNAATTATTAAATATGTAGAAGCAATAGTGCTCTGTTTATTTGTTANNNNNANNAATACGGGAAATCTTGAAACTGAGGCATA
Gma.9082.1.S1_at	CA937544	At5g20730	4e-30	Transcription	Transcription Factor	ARF	GTGCTTCTATATATCACTAGTGGAAAGGAGACATATTCATTGCAACTTGTAAGAGATGCAGTTGATGGGGTAGTGTAGAAGAGGGTTGATNCATGGCTGCATCCGGTTCAATGTCAACACGTTTTTAATGGTAGAGAAGTTAGATCCCTAGATGTACCAAAACCAGATTCCTTTACTAAAATGATGCAGATTCTATCTTGGGATCTGCTTTTCTTGTGGCTGCTATTGCATGCTCAGGAATCTTTTTTCTTTCATTTTGGCAAGGTACAGCCATATAGGTCAGCTGGTGTATAATATATATGATTGTTATTATAAAGAAAACGCTTTACTTACAATTCTGTAAATCTTGTGGTTGTTAAAGTTAGGTAACCAAGTAGTGACAGTAAGAATCAACAGTAC…
Gma.8298.1.S1_at	CD392694	At4g27910	3e-22	Transcription	Transcription Factor	Polycomb group	TCAGATGACAAGACTCAAGAGTATTGTTTNTTCTCCGCAAGGAGCACTAACCCCCCATCCCCTCTTCTGCAGGGAATCAACAGTNACACCAAAGCTGTATTTTTTATCAAACCAAAAGAAGAGAAAAAAAAAAAAAAAGGCATAGTTTAGCGTTTTTCTTTTACCCTTTTGGTTTCCTTTAGACATTCATCGAATTTTAATAAAAGCTAGATTTGGTAGCTTTTTGGCTCTTGGCGGCTCTGTAAATGAATCACCCCATATTACTCATTTTCTTCCATTTAATGTTAACCGATTTCT
Gma.8501.1.S1_at	AF184278.1	At3g01470	1e-38	Transcription	Transcription Factor	Homeodomain	ATGATGCTGTCAATTCTTCTTCACCCCACAACAACAAGGAGCCTATGGATTTATTAATTATTTCAAAAAATGCAACAACAACAACAACATCTGAAAATGGGACCAAAGTGTTGTCACCACTCCCACTCCCTATTATGGTAACATGCTGCAAGCAAGAAGATGCCAACTCAGCCAAAAGTGATGTCCTTGATTCGGATAGCCCACATTGCACTTCATTCGTGGAGCCTGCTGATTCCTCTCATGCCTTTGAACCAGAAGACCACTCAGAAGACTTCTCCCAAGATGAAGAGGATAACCTTAGTGAAAACCTTTTGATGACCTTCCCTTCTTCTTGTTGCTTACCTAAGGTTGAAGAACACTGCTATGANGGCCCTCCTGAAAACTCTTGTAATTTTGGCT…
Gma.8550.1.S1_a_at	BM092281	At5g64610	0	Transcription			AAAGCTGAAGACATATTAACCACTCTGCAGAGCCTAGAATTGATTCAATACAGGAAAGGTCAGCATGTTATATGCGCAGATCCGAAAGTGTTGGATCGCCATCTTAAAGCTGCTGGCAGAGGGGGCCTGGAGGTTGATGTTAGCAAACTGATCTGGACTCCTTATAAAGAACAAAGTTGATGGTCATTGGTCATATCCATCAAGGAAATACTATGATGTGATGTAACTTGTGCTTTTGTGTATAAAGTATATGTAGGNTAGGTTTCTTGGACAAACCCTTTGATGTATTAGTCTTTACAAATAAGATTTAATACATTTTAAGATGAGAATAGGAACATAACTGATTGTTTTATGTGCTGAACCGTAGCC
Gma.8559.1.S1_at	BE473595	At3g53710	2e-88	Transcription	Transcription Factor	Zinc Finger	GATAATTATAACTCGAGCTCCTGGGATGATTGGGACCAGGAAGATACAAGGAAGAAAGAACCAGCTAAAGGGTCATCTGCCCGTAGCAGTGATGGTTGGGCTGGATGGGATAATGCCAAAGATGATGGATTTGATGATATCTATGGAAGTGCATCTAATAGTAAAGGTGTCACTCATAATGACAAGTCAGGTGCTGCCTGGACAGGAGGAGGCTTTCTCTAAGGTTTGACCCGATCTCTATCAGCAGGATCAAAGTTTTGTTGGAAATGACCTCTTGGACTGGTGGCATGCAAACCGAGCAGGGGTGTTGTTTAGTATGATGGATGTGACCTGATTGTCAACTATAAGTTTGTTGGTCACTATTAAATTCATGCCCCATATGTACTGGATGAATGATTA…
Gma.9135.2.S1_at	BF325042	At1g32640	0.0003	Transcription	Transcription Factor	Basic Helix-Loop-Helix (bHLH)	GAACTTTTCTGAGTATGGTTTCGACCCAAAGACTGGGAACAATCAGAATCACCATTCTCTGAAGCCGGAATCCGGCGAGATTCTCAGCTTCGGCGAGAGCAAGAGAACCTCCTACGGCGGCGTCAATGGGAATTCCAATTCCAATTCCCATTTTTTCTCCGGTCAGTCGCCGTTTGTTGCTGCTGCGGATGAGAACACCAACAAAAATAACATCAACAACAATGGGAAGACAAAGTCACCGAATTCGCGCGGTAGCAACGACGACGGAATGCTTTCCTTCACCTCCGGCGTGATTCTTCCGGCCTCGAATT
GmaAffx.16411.1.S1_at	AW597927	At3g17611	1e-38	Transcription	Transcription Factor	Zinc Finger	TGGGCCGAATTGGTTCTAGCTCAGCTTCTCGTGCCGGGTGTGTCGTTTCTCGGCCATCTCGGTGGCATTCTGGCGGGGCTTCTTTATCTGAAGCTGAGGAGTACTTATTCGGGTTCTAACCCTATAAAAGTTGTCATTAGAGGGATTGTTGATGCTGTCAAGTGGCCTTTTAAGTTCTTGCCGCGGCGGGGACGGATCACCGGAAGGGGAACCGTTGGAAGTAACAGGGCGTGGAGATGCCAGACGTGTACCTATGACAACAACAATGGCTCCCTGAGAGTGTGTGAGATGTGTGGGACCAATAGGGGTGTGAGTGGGGTGTCTTCTTTTCAGAGGACTNCNNGTTCTGATGGGCTTCCTTTGGATGAGTTGCGTCGCCGGAGAATCGACAGATTTGGA…
GmaAffx.11131.1.A1_at	CD395293	At5g22250	3e-21	Transcription	Transcription Factor	CCR4-Associated	CATGGTGGATTGAACCGAGTTTGTCAGTCGCTGAAGGTGGAGCGCGTCTTAGGGAAAAGTCATCAGGCTGGTTCTGATAGTTTGCTCACTCTGCACGCTTTTCAGAATATCAGAGAGATTTACTTTGGCAAGGCTGATGGGCTTGTTCAGTACGCTGGTGTCTTGTATGGTTTGGACGTTTTCTGAGCTTTCCTATATGAAATTATATATTCAATTCGGTGTAGGTTTCTTTTTTCAGCTTTAATTGTAAAGCTTACACATTTCTGGCTTATCAATATCATTAGGAAT
GmaAffx.38951.1.S1_at	BI322098	At4g06634	2e-60	Transcription	Transcription Factor	Zinc Finger	AGCATGCTCAGGCTAATGTTGACAATGAAATGGATGAAGCAAGTGACCATGATGCCTATGTTGCGAAACGATCAAATGNTANAATTCAGAAGCAGAGTAAGCCTAAACCAAACCTCAAGTTGCCTCCTTCCAAAATTGCAAAACGCAAACTGTCCACTCCCTCTTTAACTGTAAATAAAAATTCTTGGCCCGTGAAAGATGAACCTTTCGATGAAGAAGATAGCGAAGAAACAGAAGAGGATCGTGACAATGTTGAAGATGGTTGGAGATATGCAGGAGGAAACAATGAAGATGATGATGANGAAACAGAATATGAAGACTGAATCAGTTATGGCATCCTCTATGAAACTTACCTTTTCCAAGAAATATATTTTCTCTTCTACAAAAAAATTTCAGTTG…
GmaAffx.44143.1.S1_at	BU547730	At1g02080	1e-164	Transcription	Transcription Factor	Unclassified	CCTTAGCCGTATTTTCTGTTGGTGCTGCATTGGATATTTTCCAGACNCTAATTGTGGACTTGGANACTGAAGGGCGCTACCTTTTCCTAAATGCTATTGCCAACCAACTGCGTTATCCTAATACTAATACACACTACTTTTCCTTCATCCTTCTGTACTTGTTTGCNGAATCAAACCAGGAAGTTATCCAAGAACAAATTACTAGAGTCTTGTTAGAACGCCTAATTGTTAACCGTCCTCATCCCTGGGGTCTCCTCATTACTTTTATTGAGCTGATNAAGAATCCTAGGTACAATTTCTGGAACCGGNAGTTTCATAAGATGTGCNCCNGAGATTGAAAAACTTTTTGAATCGGTGTCAAGATCTTGTGGAGGTCCAAAACCAGTGGATGATAGCATG…
GmaAffx.50295.1.S1_at	BI424123	At2g41835	1e-17	Transcription	Transcription Factor	Zinc Finger	AGCAGTGGCAGTGGAAATAGAAATGATCANCAAGTGGAGCAATGCCCTCAGTGTNGATCAAAGTTTTCCTCTGTGACTGCTTTGGTGGATCATGTGCAANAGGTTCATGAAAGAAATGGNAACCGATTAGGGGTTAAGAAGATTGATGCATGTCCTAAGTGTAGTANGGGATTTCTNGANCCTGTGTCCCTTGTGGAGCATGTTG
GmaAffx.50396.1.S1_at	BE803125	At1g52150	0	Transcription	Transcription Factor	Homeodomain	GCTGCTCTTTAAAGGCATTACCCGTTTTCACGTTTGCAAATCAAGCTGGACTTGACATGCTTGAGACAACNTTGGTTGCACTTCAAGACATCACTCTGGAAAAGATTTTTGATGACAATGGAAAGAAAACTCTGTGCACNGAGTTCCCCCAGATAATGCAGCAGGGTTTCATGTGTATTCAAGGTGGTATCTGTTTATCCAGCATGGGAAGGCCAGTNTCCTATGAGAGAGCAGTTGCATGGAAAGTGTTAAACGAAGAAGAATCNGCNCATTGCATCTGTTTTATGTTCATCAATTGGTCCTTTGTCTNATANATTAAACAGTATTAGGATGTAGGAAAGAAAAGTAGANNNGCACAAGAGTACCTAACTTTGGCGAATCCCTAGAATGCTTTAAANC…
GmaAffx.51950.1.S1_at	BM092174	At3g56510	6e-73	Transcription	Transcription Factor	General	GAGGTCATCATTCTACTATGATCTTTGGAATATTAAGTACTTAAGTAAGTTCAAGTGGGATGATCTGACTGAAGAACTAGCCTTAAAGAAAGCTATTCGGGAGCAAAAGCTGGCTGTAGAACTTTCTGCTGCCAAGAGAGAGAGGGATTTCTATCTTTCCAAAGTTGATCAATCACGTGCTTTGAGTGCTATAGAGGGCCGACTAAAGAAGAAGCAGAAGATTCAACAAGACTCAGGACTAGTGGAAAAAGTGATTCGCCATTTCCCTCAAACAAAGCCTATAGCTGCTGACACCAAAAAAAATAAACCTGAGCTCTCTGATGATATATTGGATGCTGTATTTGGTGGCTCGTAATTCATGTATTGATACTTTCACATCAGGAGCCAAAAATCACATTA…
GmaAffx.56629.1.S1_at	CA935187	At3g50870	2e-16	Transcription	Transcription Factor	GATA	TTCCACCTGCGTCTCCGAAGACGAAGAAAAACGAAGCCGCCACGAATGCCATTCCGTCTCTAACTTCTGCTGGGACTTACTACAATCCAAATACAACAACCCTCAATCCCATTCCAAGTCCTCCGGAACCACCAACACCACCGACCCTCTCCTCGCTCGCCGCTGCGCCAATTGTGATACCACTTCTACTCCTCTCTGGAGAAATGCCCCCGTGGCCCTAAGGTACGTAAATAACTACAATATTTAGGAACTTCGTTTTGGAAGGGATGGAAAAAGAGAAAAAAGAAGACAAAGGGAGAAAGGAGAGGAAGGGAATATTGTAGGGGAATGGAAGCAGCTTTGCTAGTATATTGTGT
GmaAffx.52855.1.S1_at	AW308923	At1g03280	3e-50	Transcription	Transcription Factor	General	GCCAAATACACTCACTGCAAATGATCCTNCTAGCAGTGCTTCTAATCGTCAAGTTGGCATGAAATCAAAACTTGAGGNAGATGATGATGGTACTGAATGGGAGGAGGCTCCAGTTGCAGGTATTGGAAATGAAAATTACAAGGTCGATTTGAATGTTGAAGCTGATGATACTCCAGCTGATGACGATGAAGAAGTGGACTGGGAGGAAGGTTGATGAAAAGAACAGTAAGGTTCACAAAATATAATTTTTGATGGCATATACTTATATTCAACAAATGGCAGCAGTTATATGACTGATGTCTCCTCACAATAATGCTACTATTCAGTTATATTTCCGGCGGCCTCAACGGTGGGAAACTCGATTACAATATATATTTTTTCTACCAGAAGTTTAATTTG…
GmaAffx.52970.1.S1_at	BU548330	At3g26935	8e-47	Transcription	Transcription Factor	Zinc Finger	GTGAGTTGTCTCCAGAAATTAGGACAACAGTNGACGAAACNAGTNACCGTGCCGGAATNCATCCCAGGAGATCCAGCTGGGGAAGAAAAAGTGGAAGCTGGGAAATGTCCCCTGAAGTTCTTGCTTTGGCAGCCANGGTTGGGGAATCAAATCGAATNNNNNNNNNNNNNAGCAGTTTGACCACTGAGAACAGGCATACATAGCCACTAAAAGTGAAATTAATAGTCTTGCAAAGGGTTTTNNNNGNNGTAATTAAAAGATGTTACATTTCTGATGCAGTAAATTATCAGGAAAATTATTTGTATTTGCAATATTGTGGGGGATGAAGGCTTTGGAGGGTGTTTGTTAGTGTCGTTTTAGCCATTGTGCTTCTAGGTTGGAATTGTTGTGTTGTGAGTG…
GmaAffx.76537.1.S1_at	CD416417	At1g59640	2e-46	Transcription	Transcription Factor	Basic Helix-Loop-Helix (bHLH)	TTCAGGATTTAGTCCCCGGGTGCAACAAGGTAATTGGTAAAGCATTTGTGCTGGATGAGATAATTAATTATGTCCAGTCACTGCAACGTCAGGTTGAGTTCCTTTCAATGAAGCTTGAGGCAGTTAGTTCGAGATTGAGCATGAAGCCTACTCTTGAATGTTTTCCTTCAAAAGAAGTTTGCACTCAGGCNNGANNAATATTTGGATCACAACCGGCCAAGGGATATGCTCAAGGATCACAAATGGGATGGCTGCATATGCAGATAGCTGGTGGTTTTGAGAAAGCAACATAATTCAAGGGAGATTCATAGGGAATGACAGATCAATCAGTGTGGTTGGTTNTACATTGAAAAGGAAAAAAGTCACTTGGGCTGGTTGGTTAGCATGGTCTGCTCTATT…
GmaAffx.7874.2.S1_s_at	AW152996	At5g51190	2e-24	Transcription	Transcription Factor	AP2/EREBP	CTATGAGAAAAGTGAGTTTAACAACAATAGTAATAGTAATAAGCATGTGAAGAAAGAAGAGTGCCCTTTGACTCCATCATGTTGGAAAGGCTTTTGGGACACTGATGTTATGGGAACAATCTTTAGTGTGCCTCCTTTGTCACCACTATCTCCACTAATGGTTGTTTGAGATTTTGTGGAACTTTTGCTCTTTCAATGATGTTTTGAGGTAACCAAACTAAGGGGAGAGAGAGAGATGATGCTGGTGATTGTCCTCTCTGATTTAGGTTGCTAATTTGCCTAAATCAAAATGGTAGTACTAATTAATCTACTA
GmaAffx.71523.1.S1_at	BU544012	At1g18800	4e-93	Transcription	Transcription Factor	Polycomb group	GGAAAACGATGAGGATGACTCTGAAGATGATGACCAAGAGGAGAATGACGCTGGGAGTGAGGATGGCAATCACAGNTGAAAAATGCATTATGGTGCTGTTCCCTGTTTATTTGTCTGGTTGAGTATGTAAGGCTTTTAGGCGTGGTGAGCGTTTCCATTTTTTCGAGGTGTTAACTCAAGGTGGAGCTATATAGAAAGTGGTTCTTTGACCATATAATTTATTAATTACCCTGTGAAGT
GmaAffx.81234.1.A1_at	BE823765	At2g37025	6e-15	Transcription	Transcription Factor	MYB	TACCGAACTCCCATAGATCTCAGGGACAAGTGGCGGAACCTTTTGAGAGCCAGTTCTGCACAGAAAACCTCGAGAGAGGCTGAGCAAAATGACGAGCTTGCCCTGCGTCCCTTGCCATTTAATGTGGTACATCGTGTGCGAGAATTGGCTAAAATTCACCCATACCCAAGGCAACGTGGGTCAAAGAGGTTGCGTGTTAGCCAA
GmaAffx.82750.1.S1_at	BM520585	At2g01170	2e-86	Transporter			TGGCACTGACATCTCTTGGAAGCATAGTAGCATTTGAGGCCATGGTGTCCATAGCAACAATTGGCCTCTATATTGCTTATGCCTTCCCTATATTCTTAAGGGTGACCTTGGCACGGAAACACTTTGTCAGTGGGCCTTTCAACTTGGGCCGTTATGGTGTCGTTGTGGGTTGGGTTGCTGTTCTTTGGGTGCTGACCATTTCTGTACTCTTCTCCTTGCCTGTTTCCTACCCAATAACCATTAAGACACTTAACTACACCCCTGTTGCCGTTGGATGTTTGCTTATTCTTG
GmaAffx.79139.1.S1_at	BM309694	At1g73590	0	Transporter			CAGGCAGCTCTTCCCCAAGGAATTGTCCCATTTGTCTTTGCTAAGGAATATAATGTACATCCTGATATTCTCAGCACAGCTGTTATTTTTGGGATGCTGATTGCTTTGCCCATAACTCTAGTGTACTACATCTTGTTGGGGTTGTGAATGAAAGAAATGATGGATGATACAGAAGATTCACGTGTGGCATCCATGCAAAGCTTGGTTGAGGTTGTTGAGAATGAGAGAAAAAAAAGGTCATAAAGCAACAATAGAAAAGAAGCATCACGAGAATTTGGATAGGAAGAAGAACCCCAGGATCAGTTTTTTTTATTTATTTGTTTTCTTTTTCTTTTTTGAATGAATTGCCCTTTCTTAGTGAAAATTAATGTAAAATCATGATGTAGCTAATTTACAAAA…
GmaAffx.77276.1.S1_at	BG650172	At3g13080	8e-66	Transporter			TACCATTGCTCATAGGATAACTTCAATCCTTGANAGTGACATGGTTNTGTTTTTAAATCAAGGNTTGATTGAGGAATATGATTCACCAAAGAAACTGCTTAAGAACAAGTCTTCATCTCTAGCTCAACTAGTTGAAGAATACACAAGGAGGTCAAATTCTGGTTTTGGAAATTAAATTGAAAATGAATTAGTATTAACCTCGAACCAGACATGTCTATATATATATATATATATATGGTCACCGTTACACTTCATGTAG
GmaAffx.68244.1.S1_at	BE210278	At1g30690	7e-25	Transporter			TTTGTTCCAACTGATGAGGGTTCTTACACAGTTATTGTTCAAAAAGGGAAGAAAATGGGTTCCCAAGAAGGGCCTGTTAGGAACACTTTCAGGAACAATGAACCAGGGAAGGTTGTCCTCACAATANAGAACACTTCAAACAAGAAGAAGAAGGTATTGTACCGTTACAAGAGCATCAAGAGCTCCTTNTGAGAACACAATTCAGAAGTTCTATTTTTGTTAAATTGTGTTTTTAGTTGTGTGAAGACTGAAAAACAAGAGCTATTCTTTCATTGTTAGTGATTGGTTTATATACCATTTTTTTTNGCCTGAAATGNAANNTTGATTGANAGTTCATTCATTTTATCTGTGCCAATAATGTATCTAATCTCCTTATTCTTCTGATGTAAATGATTTTCT…
GmaAffx.47230.1.S1_at	CA820051	At2g38120	5e-72	Transporter			GAGGGTGGGCTAGCATGACAAACTTNNTCAAACAGGTTGACACATTTGGACTCTTTGCCAAGTGCTACCANTGCCCGCCAAAANTCCCNGCTTCCAACAACACAANGCTGCATCATTGAAAATTATATATNNGTTCTTNTGCNTNANACATATAGGGACACATCAGCATCTNCACCNTTGTGTATTTCCCCTATCTTTTNGTTTAATCTCNCTNNNTATAAATATTGTTNATGCTGATGTTCCCTTGTGTAGNAAGGCAACATTGTTATATTTCGCTTTCGAATCATNNTGGTTAATCATAANCATGCACTATAGTTATAGCATATGTAGGGANNGNTGATGTTTGGCAATTGGNATATAGCGACCTCAAGTATAGCCTGCATGTTTC
GmaAffx.47250.1.S1_at	BE822823	At4g13510	2e-21	Transporter	Inorganic Solute Cotransporters	Ammonium transporter family	TTGGATACATATTCCTTGTAAGGATTCAAACCTTGGTTACTTGTTACTTCTGTTAGATCCAACTCCGGTTGATACTCATGACTTTTTACTTCTTTTTTTTTTNATTTGTCTTGGGTCTTCTTTTTTCGTAGATTTTTCTTTTTATGATGATGGGCAATTAGGGATTTTGATTTGTAATTGTCNTNGNNCNNNCATTGGTGGATGCTGGAAGTTAAAGATTCTGGTGGAAGATGCGTACGTTTCTGTGGGGGGTGGNNTTGTTGACTAAGGCATGTTGGTCCTGGAAATGACAGATGGCTGTGGAAAATGGAAATTTGTGGGATTTATTTTTGTAGTTTTCACCAAAAAAGAAGGAAGAAGATTGGTATATAGTAGAAATACTACTGTTTGGCCGTGAG
GmaAffx.30420.1.S1_at	AW704927	At2g39210	7e-19	Transporter			CAGCTGCTACTTTCTTTGGTGTTATTGTTTCACTCATCTTGGTAGCTAGGACAAGAACCTTTTACAAAAGTGACATATACAAGAGATACCGGGATGCTGCAGCCACGGTGACAGAAGCTGAAATGGCGAAGGTGGAGAACGGAAACAACGCAAAGAAAGATGAGAAACATGTGGTGCCAACTCAGGAGTAAGACTATTGGCAAAGGATGATGCTGTTGTAGCTCAAGGTGCAAACAAGAAACTAATTGATTAATGATGTGGTCATACCTCATACATGATATACAATGTAATAAGTGTGTATCATTATGTTTTTGCTAAATTTTATTTGCCGTGATGTTTACCTTTCGTTTT
GmaAffx.37066.1.S1_at	CD410300	At2g40540	1e-108	Transporter	Inorganic Solute Cotransporters	Putative potassium transporter family	AGCCTGAGAGTGATGCAAGGTCTGAGNCAGGAGTGCAAATGCAGGAAGAGTTNNNNNATCTTTATGCTGCNCAAGAAGCTGGGATTGCCTTCATTCTNGGNCATTCTCATGTAAGAGCAAAGCAAGGCTCATCTGTACTAAANAANTTGGCACTTAACTATGGCTACAATTTCTTGAGAAGGAATTGTAGAGGCCCTGATGTNGCACTTAAGGTTCCCCCAGTTTCTCTTTTGGANGTTGGCATGGTNTATATTGTGTAGAATATCTAACTTGTAATNAGCTTCTTTTTTTTTTGGTGTTTTTCATATAGAGGACATAGGCTTCAATGCCATAGCAGTGTGCAGTTTCCAAAAGGATTTTGTGAATGAGACTGTGGGAATGACTCTACCCTTAAAATTT…
GmaAffx.12941.1.S1_at	BE823750	At5g53180	3e-28	Transporter			GCAAGCTTCACATTTCATATTCACGACATACTGATCTAAGTATAAAGGTCAATAATGATAGGAGCAGAGACTATACCATTCCTAATACCCCTGCTGTGAACGTCCAACCCTCAATTTTAGGGCAACAATCTGTTCCCATGATGGGCCCTCCACAACAACCATACAATGGGTCTCAGGCTGGATGGGGGACAGCTCCACCAGCAACAACGGTTCAGTCTATGCCAATGCAGATGCACAATAATGTTTACATGCCATCTGGAACTATGCCACAACAAATGGCCCCTGGAATGCAATTTCCAAGTTACAACACAGCACAACCTACAACAACATTGCCCTCATATCGATCTGATCGTACTCAATAGCATGCATCTCCTTTGTCTCAAATAGATCTCTACATTG…
Gma.9971.1.A1_at	AW350095	At1g10390	2e-05	Transporter			GACAACTAAGGTTGGTCCGTCTGGTTTTGATACAGTGGAAGACCACAGTAAATTTGATAGTTNCAGAACCAATGTTCTGCTTTAAAATGTATTTGTTTTTTTCCTGTAAATTGTCACTGTATTGTGTGGATATAGCTTGGGCCAATGTTGTTGATGTGGTTCTTATCTTGCTTTGGGGATATTTGATAGATCTTACGGTTGGGGATGTTCAAATATGGGTTTCCTAGTATCATTTTTTTACGTACTTAAATTTTGATTCGCATAGCTGTTATGGTTATTTCAACTTTTAT
Gma.8036.1.S1_at	BM307319	At3g54110	5e-69	Transporter			GGCAGGGTTTTTCGCCGTCTGTATTGGCTCCCCAGTTGATGTGGTTAAGTCGAGAATGATGGGAGATTCTAGTTACAAGAACACCCTTGATTGTTTTATCAAAACATTGAAGAATGATGGACCCTTAGCCTTTTATAAAGGGTTCCTCCCAAATTTTGGACGGCTGGGATCTTGGAATGTGATCATGTTTCTAACCTTAGAACAGACTAAAAAGTTCGTCAAAAGTTTAGAGTCGTCCTGAGGCGAGTTCCCGTTGAGAATTTTCTAAGGGGACTGGTTGCAACTGCAAATGTAGTGGAAATTGTAGAAAATAAAGGTCCCTTTCTCTTCATTCTGCTAACCAGGATGTGGTCAAACATTTTTTTAGGGAGGAAAAATTTGATAGTAAAATGAGAATGC…
Gma.6944.1.S1_at	BI970468	At2g47490	2e-81	Transporter			TATCAGGCTTTTACCGAGGCTGTGCCACCAATCTTCTGAGGACAACGCCAGCTGCTGTGATTACATTCACCAGCTTTGAAATGATACACCGATTTCTTGTTTCTTATTTTCCTTCTGATCCACGGCCTCATATTTTGTGACGATTGATCTTGGTGTAATCTGTCTTCTGTAGCAGTTAGATTCCAATACATAAGCTAGTCCAGCTGAGTAATCCTTCTCTTGGCGATGCAGATATCATTCTTTGTGATTTGGTTGCTTATGTATGGTAGAGCCCCATTATATTCTATCCTGGCAACCTCAATTGAGCCCGGTTTCCCTGGTCAAACTTGTAGATTTGAGTGATAACGACGATAAAGATGATAAANGTGATACGAGATGTCCTCTGCTTGCTTATTTTAT…
Gma.77.1.S1_at	AI437873	At4g08570	3e-07	Transporter			CGTGTCACGCAAATACAGGTCCGAGTGGACTGCAAAGGGTGCGTGCAGAAGATAAAAAAAACACTAAATGGAATTCATGGTATACATGATCTTCGTGTTGACCTACTTCAACAAAAGCTCACAATTATTGGGTGGGCAGATCCAGAACAAGTTGTCAAAGCAATTAAGAAGACAAAAAAAAATGCCACCATTTGCTCTAGTATTGAACTAACGTCTCCATCTAAACCAACTGAACCAGAGCCAAAAGAAAATGCACCAGTCCCTGATGCAACACAA
Gma.7642.1.A1_at	CD415311	At2g38290	6e-27	Transporter	Inorganic Solute Cotransporters	Ammonium transporter	GACTACTATTGCCAGTTACCAACTCAAGGGGTGCATTCTATGGTGGTGGTGGTGGTATGCAGTTCTTCAAGCAATTGGTGGCGGCCATGTTTGTCATTGGATGGAACTTNNNNTCCACCACCATCATTCTCCTTGTCATAAAATTGTTCATACCCTTGAGGATGCCGGATGAGCAGCTGGAAATCGGCGACGACGCCGTCCACGGCGAGGAAGCNNANGCCCTCTGGGGTGATGGAGAAAAATATGACCCAACTAGGCATGGTTCCTTGCAAAGTGGCAACACTTTTGTGTCACCTTATGTTAATGGTGCAAGAGGGGTGACCATAAACTTATGAGTCAAGAAATTCGGCTGTGCTTTGCTCACACATATGTATAAAGTTATGTGATGAATCCGTGAGT…
Gma.7643.2.S1_at	BG157292	At5g60790	0	Transporter			ACATACCAGTGGATGCTCTTTTCATTTTACACCTTATTTTCCTCCTAACTCTCCATCCTCTAAATTTTAAACATCCCTTCTATATTTCCTGTAATATCTCTTCTCAGTTTCTATACCACTTAGCAGGTTTTGTTTGGTTCCAAGGAGGGGGAAAGAAATTTAATGAGGGAAGGAGATAGATTTTAAATAAACATTCTGTTTGTTTGCTTGAGG
Gma.6525.1.S1_at	CD413671	At5g50460	2e-18	Transporter			AGATCCAAGCTTGGGAGACAGAGAAAGAGAAAGAGAATGGACGCCATTGATTCTGTGTTCGATCCGCTGAGAGAATTCGCAAAGGACAGCGTGAGGCTCGTGAAGCGCTGCCACAAACCCGATCGCAAAGAATTCTCCAAGGTTGCCGTCCGTACTGCAATTGGTTTCGTCGTGATGGGATTCGTCGGTTTCTTCGTGAAGNTCATTTTCATTCCAATTAACAACATCATCGTCGGATCTGGTTAGGATGAAGGGAACTACAATTGCCTCAGAATTCAGGTTGTCAAGCAAAAGGAGGTAGACAGAGTTCCCACATCAATAGATCATTTTATGCCCCCAATCTTAGTTCTGTTTTCATTTTTGTTTTTTCTTATATCTGGAAGCGTTACTTTAGATGTA…
Gma.6387.1.S1_at	CD400282	At5g50460	4e-22	Transporter			CAAGGTTGCTGTGCGTACCGCGATCGGTTTCGTTGTGATGGGATTCGTGGGTTTTTTCGTTAAGCTCATCTTCATTCCAATTAACAACATCATCGTCGGATCTGGTTAGGATGAGGGGAATCGCAATCGCCTCAGGAATTCAAGTTATCAAACAAAATGAGAGGCAGAAAGAGTTCCAACTTCAAATAGATAGCTCAATGAAATTAATTGTAGTTCTGCTGTATTTCATTTTTGGTTTACCTTTGTATCTTCGGAAGCATTACAATTTTA
Gma.5998.1.A1_at	BI968591	At4g35100	1e-140	Transporter			AAGAGAAGCGCTCGTGACTCTCATATCCCCGTGTTGGCCCCATTGCCCATTGGGTTTGCCGTTTTCATGGTTCACTTGGCCACCATTCCCATCACTGGTACCGGGATTAACCCAGCAAGGAGCTTCGGTGCTGCTGTNATCTACAACAATGGCAAAGTTTGGGATGACCATTGGATATTCTGGGTTGGACCATTCGTGGGAGCGTTGGCGGCGGCGGCGTACCATCAGTACATCCTGAGAGCAGCGGCTATTAAGGCCTTAGGGTCGTTCAGGAGCAACCCTACCAACTAGTTTACTTCATCCATAGACAGACCCTTTATTTTGTGTTTGCATTCTGTATGTGTGTATGCGTTTGATGTAGGAGAACCATGATGATGACC
Gma.4979.1.S1_at	CD395251	At5g14880	2e-23	Transporter	Inorganic Solute Cotransporters	Putative potassium transporter family	ACTCGAGAGGACCAGCATATGCATTGAGTATACCTCATGCATCTACCTTAGAGGTGGGAATGATCTATCATGTATGAATGAGTTTTGGATTATATATATATATATATATATATATATATATATATATATATNNTTATCAACAAATGTTAGTTGTTAATTTGTTAGTTTTTGTTAGAGAGGGTTAGAACCCACCACTTATCCCTCCTTTTCTCCCTTCACCACCAAATTAAACCAACCTTATATCTCCTAGTATTTATATATCTAGTTTAGTTTTGTAACTAGTGAGATTATATGGTTGGTCAACCTTACACAGGATGATAAATGGTGGCATTTTGTATAGTGATACTCTCCAAAGCTTCTTGACAAGTGCTGCCGACCTGTCGTATTCACCTTTTGTTT…
Gma.4379.3.A1_s_at	CD392760	At4g11150	1e-22	Transporter			TTGTCCGGTGTTCTTGATTTGATTTACTTCTGATTGTTATGACCTAAGTTTTTCCGGCTTATTTCAGCTTTGAGCTTCTTGGCAATAAAGTAGCAAGATGTAAACATTACTGTT
Gma.4111.1.S1_at	BM891443	At4g28390	1e-155	Transporter			ACAATCGTCGCAAATGAGGGTGCCAAGTCACTCTTCAAAGGTGCTGGTGCNAACATATTGCGTGCTGTTGCAGGTGCTGGTGTGCTTGCTGGTTATGACAAGCTGCAGCTNNTNTTTGTTNGGAAAGAAATATGGATCTGGCGGCGGNNNCTAANANTGATGACGACAATTTCCTGGGATAATCATGCCGATTNCCTTGTCATTTGAATAATTNTGGATGAGAAATATTGGTATTGATATTTTCCCAAATTTAGGACCTTGATACNTAGAANNCATAGTNTTGNNANCAAGAATTTTCATTTTNGTTGTTTCATNNNNNGCCATCAGCTTATAATCCTGNAGTTTGAGNNCCCCCCNNNNGGTTNGAAATAATTAAGACTCGNTTNGATTGCTCATGNG…
Gma.3952.1.S1_at	BQ452478	At1g33440	9e-09	Transporter			AACTTCCTCAACTATCTCTTTTGGTCCAGACGCTATTCTCATGCTCCTTCCGCCCTACCCCCACCTAATACTAAGGAACATCATCACAATATTCCATAGACATCTATACTCTTTTCAGATTATTAATTTACAGTTACTGTAAAGAATTATATCAAGATGTCGTATCGCCCGGGATCTATCGAGTAGCTAGCATTATATATTGCAGTTATAAGCTTAATCTT
Gma.4331.1.S1_a_at	CD418314	At3g43720	1e-25	Transporter			AGGTATTGCACCAGGAGTCTCCAGTCCTTCAAATACAGATGCTAGTCCTGCTTCTAGTCCTGGTGGTCCAGGCC
Gma.17927.1.S1_at	BF066254	At4g35335	7e-99	Transporter			GATTTTCAACCATGCACTCAGTGGAATTGCNGTNTCAATGGTAATGAAGTATGCTGACAACATTGTGAAAGTGTATTCTACTTCAGTTGCAATGCTTCTTACGGCAGTTGTTTCTGTGTTCCTTTTTGGCTTCCATCTCTCCCTTGCCTTCTTCCTGGGCACAGTTGTTGTCTCTGTTGCAATTTATCTGCACTCTGCTGGGAAGATACAAAGATAACTATGGCTTCTGTCTTCTGTTTTTCCTATACTGGATTTTTTTATTCATTGTTGTTTAGCCTTGAGCAAACGAATACATATTAGTTCACTGTAATAGTGTNNGTGTATNCTCNNAANNCNATNNNNNNNNNNNNNNNTCAACAAGGATAGAACCAGGCTTAGGTTCGATTGTCTACATTATGC…
Gma.18030.1.S1_at	CD396158	At5g05200	1e-129	Transporter			AATGGGTGCTACAAACCAGGATGTTGATGCTAAGGCCTTTGCAAGAGATTTGGAAAAAGTATTCTCATCAATTAAGGAATTGGACACTGAAATAGTTGTAGCAACTACAACTGGAACAGCCACAAATGCAACTGCTGTTGCTGCTAATATAGTTGTTGATGAGAGGCAGATGAATGCACTCTTTCTTGATGTGGTTCGGGTTAGTGAATCATATGGATTGAAGTTTCCTAGAGAATTTGCTCTTCTCCTGAAACAGCTCTTGTACTTTGACCGGTACACACGGTTGCTGGCTCCCAACTTGAACATGCTTCAGGATCAGAGGATTTCCATTGCTTCCAATAGCAGAAGCAGGGTATAGAGNACAATTTTTAAGGAGTTGGTACACAAAATCTAGATGTA…
Gma.1802.1.S1_at	CA935681	At1g67300	8e-79	Transporter			GAAGCTCAACGCAGGAACTATGCATTGTTTTGCTGCAATATTTGTACGAAAGAGGTTTAGGTATTATGGCTAGCTGTGATGTAGTAGGTGGTACTATTAGCGGCTTACTTACGACACGACACCCTTCTGTTGTTACTCGAGCCTTGTGATTCTCTGATTTGGCATCCACTTAAAGGGAGACATAATTCATCAAGGGGGATCTATGCATCCCATAATATTTCCTTAAATGTACTACTTTANGTAATATTATATACGNTNCTGTACGTGACATTATTTTTAATCGCTTGAATTTTGTCCCATTTTGGATACGAAGTAGTCTAGCGTGTAAATTCTGTCTGCAGAGTTTATCGATGGGCGNAAGCTTCGTGAGCTTAAGAAATAGCTATGATCCGTAATTCA…
Gma.2372.1.S1_at	BM143592	At2g38940	9e-27	Transporter	Inorganic Solute Cotransporters	Inorganic phosphate transporter family	AGCAAAGCAGATGCAGGGTACCCTGCAGGTATTGGTGTGAAGAATGCACTTATTGTCTTGGGTGTGGTTAACATTTTAGGCTTCTTCTTTACATTCTTGGTGCCTGAGGCAAACGGNAAATCATTGGAGGAGATGTCAGGTGAGAATGATGAGGATGTTGGAACCCAGGAAGAGTCAGAGCAATCACATTCTCANAACAACAATAGAACNGTTCCATATGTTTAGGATATGTTTATCTGTAATNTTGTTATANNNNTAAAGTAGTNGCTTCAANNNTTAGGCTTGGAAAGCACAAAAGCTTTCCNTGCNCCNCTNCAATATTTCTGTTAAATTTTGCCNGAACAACATNTANCAGGAANNANNAGATATTTGTTCTACGAATATTGGCAAATTTGAGTT…
Gma.312.1.S1_at	BI969938	At1g80300	1e-109	Transporter			ACTGCATTGCGTAAAGAGGAAGAACTCGAGAAAGAGATGGAANGAGCAGCCNCNGTCAAGATACCAGTGGTGGCTGAGANTGAGNGTGGAAATGGTTCTCTNNCANCTGGTTCACCANTGAATCCATCCTCAGGTGACTCCTCAAGNAGTCCATCTGAAGCNTCNACTCCTCNCAATTAAANTGTGCNCTTCTTTCTGTGANAAATTGCCTCANANNATGANNAAATAGAGCNCTTTTGAGAGNAGTGTTAGNTGAAACTATTTGTTGTAGGTTTATATATAAGCTCTTATAGAATAAGCTTGCTAGCTACTTTCTCAAGTCANATAATTTTTTTGTCCNCATAGATCAGNTGATTTTCTTTACTTGTTANTCATGGTTTACTGTTTNNAGTGAACCGC…
Gma.3672.2.S1_at	CD407926	At1g34130	1e-148	Transporter			GTTACAGGTTTATGACTTTTTGTCAACTTCCCAACTTAACCTATTGGCTTGGTACCACTTGTTTGACACAAATTATACAAGGTGGCCGGAATAGAACTGTGTAGAAACTAACTGAATCGTACAGGAGTGGCCAATAGC
Gma.12068.1.A1_at	BU547739	At1g71960	6e-07	Transporter			ATATCATATCTATTGGGTTGCTATCATGGTGATAAGGGTGGCTGCAGGTTTGTTGAAGAGGATGTGGTGGGGCAAATTGGCACCCTAGGATGCATTGGGGTGTTGCTTTTCATGTTTGTGTTCTACAGATTATTGGCCTACCTTGCCTTGAGACGCATCAAGAGTTGAAACTTGAAAATTGAAATTCTGTGTTGCAGCATGGTTCTTTTGGGANNNNNTGAATGCAGAGAAGAATGGATCAATTTGTTGGCTCCTAGTGCAGTAGTCACACCACTTTTACACTAGGCTAGACTGGCTAGTTGATTCGTACTAACTGTAATTGAAGAATGAATGAGGATTTTCTGTTGTAATTGTAAAGTTAGAGAATTAATTAACAAGCAAAATTGAAGTGAAGAGAGA…
Gma.10964.1.S1_at	AW277625	At1g07810	1e-125	Transporter			GTTTTGGTTGTTGCACTTCCGGTCATTCTAATTGACGAGATTCTGAAATTTGTGGGGAGGTGTACAAGTTCTCGAGCATCAAGTGCAAGAAAATCAAAGCAAAAATCAGAGTAGACGNTTTACTGTAGTNATTAGNAAAGTTGCTCAATCCTTCAGCGACATGNACGATATNATATTAGAGACTGAAGAGGTGGCNTCAACGNCAATTAATCTTAAGTTAGTGCTATTTTAGGCCTTTCTGTAGTCTTCCATCCCATTTTATAATNNGGGATGGCCGGGCTTGCATTGGGTGCACTATATGTTGNTTTTTTTTTAAATCTNTTATTATCCTTTTGCCCCTTTTCTTTGAACATTTTAAAGATATTCACNAAANNAAGGGAAAAACCTTNNANNNNNNNA…
Gma.11837.1.S1_at	BQ296775	At5g60790	0	Transporter			GCAAAGCGCAGGTCATGCCTATGAAGAATTTATCCGATGGGCAGAGGAGCCGTGTGATATTCGCATGGTTAGCTTATAGACAGCCTCACCTGCTACTTTTGGATGAGCCAACGAACCATTTGGATATAGAAACAATTGACTCATTGGCTGAGGCATTGAATGAATGGGATGGTGGCATGGTGCTTGTTAGCCATGATTTTAGGCTCATAAATCAGGTTGCCCATGAGATATGGGTGTGTGCTGATCAAGCTGTGACCAGATGGGAAGGTGACATTATGGATTTCAAGGAGCACCTAAGGTCAAAGGCGGGTTTATCTGACTGAAGAAGATAGTGGGACTGGGACACTCCAGCATATCACCATCTAAGGACTACGTTACGTACTGCTGCTTGAGTTGGAT…
Gma.11321.2.S1_at	BE807077	At4g38510	0	Transporter			TGAGGGAATGACACGAAAGGATCATTCNGATGTGTCCAACCAGCTCTATGCAAATTATGCCATTGGAAAGGATGTCCAGGCAATGAAAGCNGTGGTCGGAGAAGAAGCACTTTCATCTGAGGACCTGCTGTATTTGGAATTTTTGGAGAAGTTTGAGAGGAAGTTTGTTGCCCAAGGAGCNTACGATACACGCAATATCTTCCAGTCACTAGATCTTGCATGGACTTTGCTTCGGATTTTCCCTCGCGAGCTTCTNCANCGTATTCCTGCAAAGACTCTTGATCAGTTCTACAGCCGAGATGCCNGNAACTGANGATATAATANNNGCAAGGTCTTATANNNNNNNCCTTAGTCACATGCTCAATCATCTTGTAATGACCNTGACNATTGTTTTATTTC…
Gma.12504.1.S1_at	CD393758	At4g38920	2e-58	Transporter			ATCTACGGTTTGATCATTGCGGTTATCATAAGTACGGGCATTAACCCTAAGGCCAAATCGTACTATCTTTTTGACGGCTACGCCCACCTCTCTTCAGGTCTCGCTTGTGGCCTCGCTGGCCTCTCCGCTGGCATGGCCATCGGCATCGTTGGCGATGCCGGTGTTAGAGCAAATGCTCAGCAGCCAAAGCTTTTTGTTGGAATGATACTCATCCTCATTTTTGCTGAGGCGTTGGCATTATACGGTCTCATTGTTGGCATCATCCTCTCTTCTCGTGCTGGCCAATCCAGGGCTGACTAATAAATTTTCCTGTTGGATGCCACAGATTGTGAATGTTACTGTGAAGTCCGGGTGGGTAATGTTAGTACACAGCTGCCGCTTTGGCTTGCTCAAGTGATT…
Gma.12432.1.S1_a_at	BU765584	At5g33320	8e-60	Transporter			GTTAGACAACTTTACATCAGATCTCTTCTTGCTGCACTCTGTTTCCATGCGTATCAACAAGTTTCTTATATGATATTGCAAAGGGTATCACCTGTTACCCACTCCGTGGGCAACTGTGTGAAGCGGGTTGTGGTCATTGTGAGCTCTGTCATCTTCTTCCAAACACCTGTCTCACCTGTGAATGCTTTTGGAACTGCTATAGCTCTTGCTGGCGTTTTCCTCTATTCAAGGGTGAAGCGTATTAAGGCAAAGCCAAAAACAGCTTAATTTTCAATTGTAAAATTTTGTTAGTTGCATCACGGAAGCCAAATAGTTGCAATCTGCAATTCTGAATTTCT
Gma.11242.3.S1_a_at	BI427009	At5g19760	1e-49	Transporter			AGGGTCTATCTGCTGGATTACTCAGGCAGGCTACATACACCACTGCCCGTCTTGGGTCATTTAAAATCTTGACGGCCAAAGCTATTGAGGCTAATGATGGGAAGCCCCTGCCACTGTATCAGAAAGCTCTATGTGGGCTGACTGCTGGTGCTATCGGAGCAACTGTTGGTAGTCCAGCAGATTTGGCACTCATTCGGATGCAGGCTGATGCAACATTACCTGCTGCTCAGCGCCGAAATTACACTAATGCCTTCCATGCACTCTATCGAATTACTGC
Gma.11244.1.S1_at	CD392812	At1g77610	1e-113	Transporter			ATGTTGCCGGAAATCTTAAGGTTGCAGTTGCCGTCCTTGTTTCTTGGCTGATATTTAGGAACCCAATTTCGTATTTAAATTCTGTTGGATGTACCGTGACTCTTGTGGGATGTACATTCTATGGTTATGTGAGGCACAAGCTCTCCCAACAGCCACAAGTCCCAGGAACTCCTCGGACACCCAGGACTCCCAGGACCCCTCGTAGTAAGATGGAGTTGCTTCCTCTTGTAAATGATAAATTAGAAGATAAGGTCTAGTTCATTTAGCTACATATGATGAGGTTTCAGCCTTTTTGAAGGCAGTAATAGCATANGGTACAAATACATTAAAATAACTTCGGTTATTATTTGTTAGATTACCTCCGAA
Gma.11144.1.S1_a_at	BE820412	At4g38920	4e-58	Transporter			CGTGCTGGTCAGTCTAGAGCTGATTAAGAAAGA
Gma.10954.1.S1_s_at	BU551388	At5g26340	1e-114	Transporter			GTGAGACTTTCCCATTGGAGACTCGNTCCGCTGGTCAGAGTGTCACCGTTTGTGTNAACNTGCTCTTCACCTTCGTCATTGCACANGCNTTCCTNTCTATGCTCTGCCACTTCAAGTTTGGNATCTTCTTGTTCTTCTCTGGCTGGGTCCTCGTCATGTCTGTCTTCGTGCTTTTCCTGTTGCCNGANACNAAGAATGTCCCCATNGAAGAGATGACCGAGAGAGTGTGGAAGCAGCATTGGTTCTGGAAGAGGTTTATCGATGATGCCGCNGATGAGAAAGTAGCCNATGTCTCTAATGGTAATGGATTTGATCCAACCTCCAGGTTGTAAATCNATTTGCATTGAGTATTTTAGACTCTAG
Gma.10168.1.S1_at	AW309604	At3g01390	1e-23	Transporter			GCGCAAAGAATTGTCAATGCTGCAAAAAATGAAAAATTGGCTAGACTGAAGCAAGCCAAAGAAGAGGCTGAAAAGGAAATTGCCGAGTATAGGGCTCAGTTGGAGTACGAGTTTCAAAAGAAAGTGTCACAGAGTAGTGGAGATTCTGGTGCTAATGTGAAGAGACTTGAGCAAGAGACAGAAGAAAAGATTCATCACCTGAAAACTGAGGCTGAGAGGATATCAGGGGATGTTGTCTCCATGCTCCTCAAGCATGTAACAAGTGTGAAGAATTAGAGAAATATTGGTGCTGGGGAACTCTTAAGTTATGCAGAACAGTATATCTCATTTATATTGTGTTTATTGTTGATTCTAGATCCTGGCGCTGATAGATTCNTGCTTTTTTNGTTGGCNTATAAT…
Gma.14471.2.S1_at	CD408292	At5g60660	1e-137	Transporter			CAATTAAGCTACCTTAATTTGCCAACAAGGCTAGCTATGAGTGGTGTTTCCCCGGAAGAATAATAATTTCTATGTTGAGGAGTGCCAGTGATCTGTCTCTGCAGTTCCCTAATTTAGGCTTTTTCGTTTTTTCCTTTCATCAGCTACAATTGTTGGAGGGTTTGGAGGATAAGGCCAAAACCATAGGGTCATGCATCAAATTGTGGATAAGCATGCTTGTGTCCAAGGGTGTATTTTGTATCCCTTTTGTGTCTTTTCTTTTTCCTTTTTATAATTTCCATGTATGTATTCCTCAAGTGTTCCTTTTCGGTCTTGT
Gma.14524.1.S1_at	BE020189	At5g53480	1e-107	Transporter			GCCTTGGCAATTGGAGAAAACTTTGAGAANTACNTGTTATATGCAATGCCTATGCTTCAGAGTGCNGCAGANCTCTCTGCTCATACATCTGGTGCTGATGANGATATGACAGAANNNANNAATTCTTTGAGAAATGGAATTCTAGAGGCATACTCAGGGATCTTCCAAGGATTTAAAGGTTCCCCAAAGACCCAGCTTCTGATGNCNTATGCTCCTCATGTGCTGCAATTCTTGGATAGTTTGTATANNGAGAAGGACATGGATGATGTTGTGACTAAGACAGCAATTGGCGTGCTTGGAGATTTAGCTGATACTTTGGGNAGTANNGCTGGCCCNTTGATTCAGCAATCTGTGTCNAGCAAAGACTTCCTNAAAGAGTGTTTATCATCTGATGANCAT…
Gma.16475.1.S1_s_at	BI969192	At4g01100	3e-08	Transporter			GATGATAAATTAGGGTTACTTTCTTGTTTTTCAACTCTTCAATGAGTTAGGCAGCACTTGAGTTAGCGTGTATAAATTAATTCCCTTGCATCCCATTTGTTTTGCCTTGGGAACATGATTTAGCTTTTAGCTTTTTATTCATCTTCTATGGCAATAAATGTT
Gma.17372.2.A1_at	AW310753	At3g58730	6e-23	Transporter			ACGAGCTCGAGAGGGAGGATTTCTTCAGGCTAAAGAAGATTCAGGGGTATAAGAAGAGGGAGATTGAGAGGCAGATGCTGCTGCAGAACAACTCCAATGTCGAGACTAATCTCCCTTTGCGCAAAGGGGTTTCGTACAATTCTGCTCACAATTTGTTGTCTGTGGGTGACAAAGATGAGGATATTATTTTCTGAATGTGGTTCAATGTTGTGATGCTGCTGCTGGGTGAGACTGAGACTTCTCTGCTATTGTTTAGGTCACAGTGGAGTGTATCATGAATAAATGTTGTTACTGGTTAGTA
GmaAffx.85761.1.S1_s_at	BE658257	At5g05820	1e-141	Transporter			AAAAGCGAAGCAAGTGATACTGATGNTGTNNGTCATTCATGATTCTGTGGAAATCAGCAGTGAANTCCCTATATTTGTTTTCATNNCTGTGCGGACAACCTCCAGATACCATGAGGNCAAATTTGNTATCATGATTATGACCAGAATGTTTCAGACTCTATATAAATTTTTGGCCCTACATGGAAAAACGGGTTCCCCATTGTATTAGTACCTGTGCAGAAATAGCCCACAGTACAAAGTTTCAATAAGTGACTGATCTCTCTAATATATACCCATGTTGGCATATAATCGAGGAATGTCTTTTTGTCATTTATTCTTTGAAGAAAGAGTTGTAGAAGGATCTCTACTCATTTGTTGTTTACATTGCTTACATTTATTTATTGATGATAAAATTTGTAT…
GmaAffx.90633.1.A1_s_at	CF806358	At2g14740	5e-34	Transporter			CGTGTTTTGGTGAATATTCTGCTTCAGTGCTGAATATCTGGGTGATTATCCTCGTATTGGTTGTTGCTGTTGCGGGAGGATATGCATTTTACAAGTACAGAATCCAGAGATATATGGATTCGGAGATACGTGCAATTATGGCTCAGTACATGCCTTTGGATAATCAACCTGAGGTCTCTAATCAAGTTCATCACAATATCTAGAATGATCTCTACAGCTAAATGGAGATAAATGATAATCATCAGCATGCTCAGTTTGCTGATAAAAAAAAAAAAAATCAGCATGCTCAGTTTATATTATCATCCTCTTCCTCTCGTAGGGGGTTTTTATTTTATTTTTTCCTTTGTTAGTATTATTTAGCTTTATAAATTTTAACCCAAAGTGGTCGTGACATTATCT…
GmaAffx.9037.1.S1_at	BE822770	At2g37410	1e-68	Transporter			TGCCGATGATTGTCGATGAGCCTCTTCCGCCTAACGGGCTACCGGGCCAGCCGGTTGCTTCGGCGCCGGACGCTGCCTCGCAATCGTCGTGGTTAGGTGGTTGGTTCGGCGATGGGAAGAAGGATGAGGCGGCGGCGGAGGCTACCGGAGGAAGCGAGACCAAGGTTTTAGAGAGCTTTGATGCGCCTCCTGTGCCCAATTTCGAGTACAAGTGAAATTGGTTAAGAATTAAAGATAATTTATTTTTGGGGTTTAGGGTTTTAGTTTTCTTTTTAGGGTTGGGAGGTTCTTTTTGAATCTTTCTTCTCAGTGATTGACTATTATTGTATCAGCAAGTATAGTTTCGATTTGCCTTGTTTT
GmaAffx.91590.1.S1_s_at	CF807315	At1g10950	6e-77	Transporter			TTCCCTTTGGCAGCATATTCATCGAGATGTATTTTGTATTCACTTCCTTCTGGAATTACAAGGTGTACTATGTCTATGGCTTCATGCTACTGGTTTTTCTGATTCTTATCATTGTTACTGTTTGTGTGACAATTGTGGGGACATACTTTTTGTTAAATGCTGAGAACTACCACTGGCAATGGACTTCTTTCTTTTCAGCTGCCTCAACAGCTGTTTACGTGTATTTGTATTCAGTATACTACTACTATGTGAAGACGAAGATGTCAGGCTTCTTCCAAACCAGCTTCTATTTTGGATACACTTTGATGTTTTGTCTTGGACTGGGAATTCTGTGTGGAGCTGTGGGTTATCTTGGTTCGAATTTGTTTGTGAGGAGGATCTACAGAAACATCAAGTGTG…
GmaAffx.92730.1.S1_s_at	CF808455	At5g40780	0.0002	Transporter			GGACTACAAGTTCTACTCATAAATTCATTCCTAACTGAGTCAATGATGGGAATCTGAAGCATGCAATTGCAAATACAAGAAGGGAATGAAAGCTCAATAAAAGTCATATGTGTTATAGAATCTGGTTTATCTTAGGTCGCTGGGTGCTTTAACTATAGAATGCAAGAATGCATTGGTTGAGGAGGATCATCTGCAACTTGCTTGTTAGTGGAA
GmaAffx.34291.1.A1_at	BE822401	At2g22350	1e-18	Transposon			ATTCTGGTAATGCTCTTGGTCTTGTTAGGCATGGCCCTGTGCTAACGACCCTGCTTTCGCGTTGGTTTCGGAGATCAACGAGCTTGTTCGGAAAGAGTGGTTGGTAGAGTTCTCGCACGTGTTTAGAGAATCTAACCGTGCGGCTGATAAGTTGGCTCACTTGGGACACTCGCACTCTCTGGAATCGGGTGCGAAGCGATTCTCGGACCCACCCTCTGCCCTTGTTGCTATTCTTCAAGATGACTTGGCAGGGCTTGCCAAGCAACGTGGTGTTAATTAAGTGTAAGAGACTGTTGACCAAGCAATGTAAATTAGTTAGAGCTTGCATTCTCGATCATCAAA
GmaAffx.60596.1.S1_at	AW101683	At2g27110	6e-19	Transposon			GAATTCGTGCTTCCAGTGTGATGCCGTTGGTGCTTCTGATAACTTGGAAAACCTTNCTTGCCTCAAATCAATGACGTGGACCATGGAGAATCGTGGCTCATCCCCTGCAGATAGAGTAGCTATAATCAGCCTTAAGCTGCATGATTATAGCAAGTCTCCATCAGGTGAAACAGAGATAAAGTTTCAGCTCACAAGGGACACACTTGAGGCTATGCTGAGATCCATGACATACATCAGGGAACAACTAAATGCTGTTGAGACTTCTTCAGGACCAGCAAACAAGAAACAAAAGCAGTAGCTTATTTTCCAGAAATTAATGCTGTAGTTAGTAATATTAAGACAAATATCTCATCCTTTTAGTCATTGGATGTTATAACTGATTTTTGTCCCTCCGATTCT…
GmaAffx.64406.1.S1_at	BE823417	At1g11760	7e-38	Unclassified - Hypothetical Protein NOT Supported by cDNA			TCACCCCACACTTCACGTAAGTGAAAACGGCACNATGGACAGCATAGTTGATTCTCTGAATAATGCCTATCAAGATTTTNTTGTTGCAGCAGCNAATGTGTTNGAAGCCAAAGAAAATGCTGGTTCCATTNAAACAANNGCAACNGATACTGCTCTAGAAAACTTTAAGCAGAAGTGGGAATTGTTTAGAGTAGCATGTGATCAAGCTGAGGAGTTTGTGGAGTCTGTGAAGCAAAGGATAGGATCNGAGTGTCTGGTGGATGAGGCAACAAGGCCTGTNGCAGGAAAACCTGGACAAGCTACCATGACNGGTCTTCCTCCCATNAGTGCAGTTCGGTTGGAACAGATGAGTAAAGCNGTTCGATGGCTTGTGATTGAATTGCAGCATGGCTCTGGAGC…
GmaAffx.57085.1.S1_at	BQ742835	At5g14890	2e-12	Unclassified - Hypothetical Protein NOT Supported by cDNA			AAACATGGCATCTTACGAGGGAGGGCCATTGGTGATGGAAATGGAAGGAGAAGAAGGTTTCGAAGAAGAAGCCGGCAGCAGCGGTTGCGGGTGCGGATGCTTCGGCCTGAAGAAATGGTGGCAAGGCCATGAGGAAGAAGGTAAAGGGCTACTTGTTGATCAAAAGGGTGAGGGAGAGTCATGGGTGGTGGAGAAGTTAAGGAAGGCAAAGGAGGTTTCAGAAGTGATTGCTGGTCCAAAGTGGAAGACTTTCATTAGAAAGATAAGTGGGTATGGGAAGAAGGTGAAGCAACAAAGGAACAGGTTTCAGTATGATGAACACAGCTATGCTCTCAACTTCAACTCCGGGGCTCAGAGTGAAGATGAAGGCATGCCTCACAGTTTCTCATCTAGGTTTGC…
GmaAffx.57389.1.S1_at	BM890895	At2g26110	5e-15	Unclassified - Hypothetical Protein NOT Supported by cDNA			TAATCTTGGCTTTAGTAAAGTCGAGATGGAAAAGCCTGATTCGATACAGCAACAGCTAACCCGTGCTCCCTCGATCCTCCAGCGGCTTAAGTCTTCCTTGTCGTTTGAGCCTGAATCCGAAGTTACCGGTGGTGGAGAGTTGGCGGAGGAAACTGAAGAAGAAGGGGTGGATGCAAAGGCTGATGATTTCATCAACAGGTTTAGGCAGCAACTGAGGTTGCAAAGGCTTGACTCTATTATACGTTACAGGGATATGCTCAAACGATACTAAGAACTAGAGAAGAGAAGAGAAGAAACTCTTGGATNCNANATTTTCCCCAATAGTTCATTCCTTCACCACCAGCTGCATGAACACGAGAATTCTGCTAGCTAGGGTGTTGTTTGTTTGTTTGTAATGGT…
GmaAffx.59245.1.S1_at	BM094626	At4g12650	3e-35	Unclassified - Hypothetical Protein NOT Supported by cDNA			TGAAGTTTGCTTTGCTATCTCTCACCAGCTAAAGCAAAAGGCATGCTGGAAGAGGAATTTTTCTTAAATAGTGTAACTTTTGCTTAATTCTTTTTGTAGCTTGATTTGCAGCATGTTGAGTGGNGAAATAGATGCCTTGCTGATTGCAGTAAATAGTTGCCACTCAATTTTATGTTGCTATGCGAACTACAGTTTGTTCCCCTTTCTANCTGTCTCTCCCGTAAGTNNNTTACTCATTCAACTAGTGTTTGGTATCATTNTGTTTCATGTGATTTAGTTTGNTCAAGTTGCTTGAGGAAGTTGTAATTGCNCAGACTGTCTTATTCCTTATTCTTTCAAATATCAAGAAAAATTAAAGGGATACTTCTAGATTTCTTGACGGTATCCACTGTGCTTTTG…
GmaAffx.73818.1.S1_at	BG044238	At5g63910	1e-29	Unclassified - Hypothetical Protein NOT Supported by cDNA			ATGTCTTTGAAACTCCCTTTCCTGTTGACCTTGTTCCTCGCACTCTCCCAAGCTCAACCGCATTCCGATGATCCACCGCCGCCANCCTCCTCCAACGTCTGCGTCATCGGCGCTGGCATCGGTGGCTCCTCCGTCGCTCACTTCCTCCGCAAATACTCGCCGNCCTCCACTCCCTCCACCAAAATCCGAGTGTTCGAGCGCAACGGCCGCGTCGGGGGACGCATCGCCACCGTGACGGTGGCGGGCGAGACCTTCGAGGCCGGAGCGTCCATTCTCCATCCAAAGAACCTGCACACAGTGGATTACGTTAAGATCCTGAAGCTGAAGGTCAAAGAGCCGACCGCGTCGGAGGATTCCCTCTCTCTCGGCATTTGGGATGGGAACAAGTTCGTTTTCA
GmaAffx.81156.1.S1_at	CA819098	At1g62870	1e-91	Unclassified - Hypothetical Protein NOT Supported by cDNA			ATATTGCAGCTCATGCCAAACTTGANAGGAGAGACTTTTCTANNGNNGAAGANAAGGANGCAGAGCTGTTTGNCNTGTCNNNNAGTGAGGATGNCATGCTNGNTGANGTNTATGCTGATGCTCCCTTAGTGTAATGTGCTTTTTTACCTCTTATAGAATTGTGTAATTCTAGGATTTATCAGATTCTTTCAAGAACTCTTCTATTATTCCCTTATTACATTTGGTGGGAAACTTTTCATCACTTTGGGGTTGAAATAGAAGGAATATTAGAAGGACCAAAAAAAGCATGTTGTTAGCGACTGTGTT
GmaAffx.82831.1.S1_at	AW306729	At5g18150	2e-18	Unclassified - Hypothetical Protein NOT Supported by cDNA			AACATTCTCGTACACTTGATCCTTCTTGGGTTGTCANCAATTTTCCCTCTTTTCATTTTCNNTTNCTGAAAAATCATACCTTGAAATNGAAAGNCCCTNGTTTTNTTTTTNTTNNTTNGNNNNNNNNNTGNTGNTGTGAGAGAAATGTGCCCTTTAAGGTTTATCTTGGTGTTCTTCTCCGCCGTGCTGGCGGGTTATTTTGCGTGGAAAACGGTGCGTTCTNACCCGANNNTCGAGGTGTTTTCCGAGGATTCTGCCNATGAAGATAAATCCTNCAAGAAGGNAGATTTTGATTTCAAGAAGATGATTCAGAATGGATTTTGGGGTTTCGTTGACATGGCTAGTGGGAGGTATCTGTGGAGGAATTTGAGGNCAACCAACAAAGACGCCGAATTGAAA…
GmaAffx.82924.1.S1_at	AI855613	At5g47790	1e-107	Unclassified - Hypothetical Protein NOT Supported by cDNA			CAAAGTTGGATCTTCCTGGGCATATTCACCTGCACTCGGAACTGGTGAACGGGCTCCAGATAAGGAGGATGGTGCGGGGAGCGGAAAGTCAGAGAGTAATCCTAATGCTGTTGATGGAGACGATGATGATTTGTTTGGGTGACCATTGAACTTATACAGACTGGGTTGTGAGATAAATTTGTAGTAGTTCTGTTTGAGTTTGACATCGTAGGGAGTNGNAAAGATGCAAAATATNATGNTGCATGCTTCTTTTGTCCTCGGGAGTTAATTGTTCCTTCCAACGAATCCATGATTATTGATGTTTTCCGCTGCATGCCCCCACTTACTCTAAAAGACAGCAGGTTCATGGTTAAACAATGTGTTATCCTTGTATGGACCCATTAAATAGCTCATTTAAGT…
GmaAffx.34438.1.S1_s_at	BG509587	At1g01490	9e-12	Unclassified - Hypothetical Protein NOT Supported by cDNA			GGACATGAATGACCTGAAAATGACTATAATTGGGAATGTTGNATGCTGTAATAGTAGTTGGCAAGCTTAGAAAATGTTGTGATCATGCTGATATACTATCAGTTGGACCAGCCAAAGAGGAGAAGAAAGAGGAACCAAAGAAAGATGAGAAGAAGCCAGAAGACAAGAAAGATCCAAAGGAGGAATATGCTGAACTTCTGAACGCCTTTTATAATCAGACCAGACAGCAGCAATACCCCCCTTATTATCACAGAACAGTGGAAGAGGATCCAACTAGCTGTGTTATTTGCTAAGTATTGGAATATCATATGGAGTTTGAAATGATGGATAATAAAATGAGATCAAGAAAAGATGGTGGCTGCATGGAGTTGAAGAAGAATTATGTTTCTTTTGGAGTTC…
GmaAffx.3704.2.S1_at	BI320426	At1g01490	3e-25	Unclassified - Hypothetical Protein NOT Supported by cDNA			ATGCTTGTGTCGTTTGTTAAATACCAAGCTGTGGAAGAAAACATGAGGAAAGGAAGACATATATAAAAATATATATCAAACTTTCTCTATTTGCAATGGAATCAATCAGGTCAATTTCTCTTTCATGAATCCTGGGAGTTCATAATATCAAGATAGAAACAAACAAACAAACTCCTTTGTATATATTTTGGNTGGTGGTGTCTCCTCTAGTTTTGTTCTGGGACATTAGCAATGTGTAGAGAGTAGGAATAAAATTTTGGGAGATTTGTTTTGACAATGATCACAAATGTAATCATATACTATTATGTTAATTTCCTTTTTTTTTTTTTAAGTTGCTGCCTGCATGTATACAGTATTAGTGGAATCAGCAATTAGTAATTTTGTACGTTGCTGATGCCA…
GmaAffx.35680.1.A1_at	BE823994	At5g58930	1e-06	Unclassified - Hypothetical Protein NOT Supported by cDNA			AAGGCCATGTTTTCAATGGAAGGCAGAAGTTTATGCTTCAGAGGAACCGGAGTGTTAGGTATTCACCAAGTAATGCTGACAATGGCTTGTTAAGGTTCTATTTGACACCCTTGAAAAGCTATAGGAGAAGCAGGTCTGGAAAGACTAGCTTAAAGAGTTCAAATCCAACAGCCAGAAGTTTCTTTTGAGGCTGTAACTAATGGAAGTATATCTGGTTGTATAAACATATATAATGAAATTGTTTCTTGTCCTTGCAATCAAAGTACTTCACATTGTTAGATTGCATCAC
GmaAffx.3108.2.S1_s_at	BI967604	At2g38360	1e-63	Unclassified - Hypothetical Protein NOT Supported by cDNA			GTCCGTCAGATCAACCACTCGTTATTCTTGGCAGAACTTTTTCAGATTTCGAAACCCTAGCGCTCCTCTCCGCCTTCACCGTCTTCGTCGTCTTCCTCACCAGCGTTGGATCTGTTCTCGTCTCCGCTCTCATGCTTGGCGTCGCCGTCGTCTGCCTCCACGGCNNGNNNNCNNCGNNGCCGGAGGATCTGTTTCTTGACGACCAGGACAACTCTCAGGC
GmaAffx.2818.1.S1_at	BE800363	At1g76850	1e-74	Unclassified - Hypothetical Protein NOT Supported by cDNA			GATGCTGTTGACAATCCAGGACACAATCGTCGGCCAACTCGTGGTAGTGAAGATGCACTTGCAGATGATAAGCAACAAGGAACAACTGTGTCACCTGATGAGCTCATTTCTCTTGCACAGCAGTACAGCTCCGAGNTTCCTTCAATCAGAGCTTGAGAGGACACGCATTNAACACAGCATGCTTTGCGGAATCTTTTCCTTTGGACTCTGTGCCAGAACCAGCCAAATCTGCCTACTCTCCCTTCAGGAACTCAATGGATTCTCCTAGCAGAAACCACAGAGGTACCTACAATACCGGAGCCTCAAGCTTCTCTCGGCATAGACATTGATGGTTATAAATTAGCTCCCTTATTCTTTTAGTTTGTTTGCCTATTGTATTTATTGTAGTATATTTTTGGT…
GmaAffx.2747.1.S1_at	AI460733	At3g51620	3e-08	Unclassified - Hypothetical Protein NOT Supported by cDNA			TTAAGACTTTGCCTACCTTTCAGCAGGTGCTACCAAAGGATGGCGATTTTGTAAGAAGTAAGAAGTAAGAACAATGTGCATTCTTCTCAAAAATGAAGATAGCTTCCCTCAACTCTGGGTCTCTTCTAGAGATTGTTGAACACATAAAAACGAGAGTACCAAATAAGTAGAAAAGTGCTGGGAGTAACCTTAGAAACTAACGAACTAGACTAAACTAGATTGGGTGTTATGTTATCTTTATTCTCTCTTTTCTTACTTAAGTTGGTCCTTTGTACAAAAGTGCATGTATATTCTCGTTACTTTTTTNGGCTCTTACATCCGTGTTTATTTTTCATTATTTAGGGATGTATATATCAGGTGATTTCCTGAGGTTGAGTTTATAGTTCTCTTCTGTTTGTA…
GmaAffx.25596.1.S1_at	BE823050	At5g20600	2e-14	Unclassified - Hypothetical Protein NOT Supported by cDNA			GAGTTTGAGGTTGCCTCCCTCTGCAACACCCAGAGGAAGTGCACTCAAAAAGGGTGTGCCTCCAGGTCCTATCAGGGAGATGCCTCTTCCTNCCAAAAAGCCAAAACTGAAGAGGGCCAGGAAGNCAATTAAGGGTGTTGCTCCTGTCAAACGCCTGAAGAAATTAAAATCNCGTGCTGCATGAATGNTTTNATTTTNCNGCACCTTGTTATGGGNTTGTGTTTCCATGACTTGTTTGTCATACNATTTTAGTTATTATTNNNGTGAAATTTTNCAAAGTTTNATTGTGATAATTCATCTTTGCAACAATTGAAAAGCAAATTGACNTGTAGTTTAATCAACTATNNGTGTCCATGCCNACTTCTTNCTATNATNNNATNNAATAACTTTTAACTGCTT…
GmaAffx.2651.1.S1_at	CA937355	AtCg00300	6e-16	Unclassified - Hypothetical Protein NOT Supported by cDNA			GCCATCTCTCCAAAAGCTAATTTATATTTTATCTTTATTCCACTGAATAGAACATGAGCATATAAATGGATACCCTTTATATTATCTATCTTTATATTATCTATAAAGGGTAAAGATATCCGATGTGAATCTATTTGTTTAGTTTTCTATCGGTATGTATATAGGTGAATAATCCAACATGCCTTTTTGTGAAGTAAAAAAACTACCCTCGATCCATGCCTCAAAAGGGTTGATAATAAGTAAAAAAAATCAATGAATTCATGATAAAACCCTTCTGCGTTTTTTTATTATAAATTTTTTTGTCAATAAAGGGATCAAGGGGTTGGGGGATCAAATGGTAAAGTTCTTTTGTTGGTAAATTGGAGGATTAGAAACATGACTATTGCTTTCCAATTAGCT…
GmaAffx.26697.1.S1_at	BE821770	At5g11640	2e-30	Unclassified - Hypothetical Protein NOT Supported by cDNA			ATAGTTGATCTTGGTCTCTTTCCCAATGCTGCTGAAAGATTTGGAATATCTCTAAGTGGAAGCATGGGCCAGCTTCCAACATTTATCTTATTTGAGAATGCAGCTGAAGTTGCCCGCTTTCCTGAGTTGGATTTTGAAGCTGCATATTTTCACCCTAAAATTACAAAGGGGCTTCTTTCTCGACATTTTGAGCTTGATCGGCACCTTCTCGAATATGTTAGTGGTAAATAGNNNGATGTTAGTGGAGCAAGTTGTCCGAAATTTAGTCATCACTGAGAATGGCAATTTTGGATTTCCGGATATCTGAGGAGGACATTTTCGTAAATGAACTTTGAAAGTTAACGTTTGTTTAACACCATCACACAAGGGTCAAAGTAATGTCTTCAGACAACGGGGGTG…
GmaAffx.4466.1.S1_at	BI701708	At5g28500	3e-43	Unclassified - Hypothetical Protein NOT Supported by cDNA			CCGATGCTAGGGTTTTGCCGTGGAAGGTGAATAGGTGGTATAAGGAGGAGCCTATATTGGTGGTGGCTGACAGGAGTAAAAAAGAGGTGGGTGCCGATGATGGGTTTTATCTTGTGAATGCTGATGGTGAGGGTTTGAAGGTCGAGAGGGGTTCGGGATTGAAGGAAAAGGGTTTCACTCAGAGTTTAGGAACTGTGTTATTGGTTGTTAGACCTCCCAAAGAAGAAAATGATGAATTGAGTGACGAAGACTGGGAGTGAACTCAAATCAAAGGGAAGGGAATGATTGAGTTGCTAAAGAATAGCGATAACACCACATTATATATATATATATATGGTTTTCTCAATTCAAGAATTGCTAGTTAACTCAGCTCAATCCCCTGCCTTTGTTTTTTGTGTC…
GmaAffx.43631.1.S1_at	AW185262	At4g24690	0.0001	Unclassified - Hypothetical Protein NOT Supported by cDNA			TGGATTTAATCAACGGCGAGCAGTATTTTAGTTGAAATGTTAGTTAATAGTAGTTTATGTAAAGGTGGCGACTTGGGCTTCTTTACAGTTTAAGCCTTGTTATTTTGATTTATAT
GmaAffx.45259.1.S1_at	BG237290	At5g63830	9e-06	Unclassified - Hypothetical Protein NOT Supported by cDNA			GGAAGTCTGGTCTTCTTTAGCAGCCATTGCAAGAGCAGAAAAGACATCGGCCATGGAATTTCAACAGAGCAATAGATCTGAAGATTTGAACAATAAGGCAGAGGCCAAAGGCAAAAGTTTAATTCAGGAGATTTAATGATTTACGTAGACTGCTGCCCCTTACTGTTGACCATATTTAATTTTAGTCTTAGAAATTTATGTAGGACTGAAAATGGTTGTTCTCAAANGCTGTTGTAAATGTACTTTTACATA
GmaAffx.46165.1.S1_at	BM887406	AtCg01130	6e-16	Unclassified - Hypothetical Protein NOT Supported by cDNA			AATGAATCTCTTGAATTGGAGTTAGAGACTCGAAATCGGGCAAAAGCAGAATACCCTGATCAACGAAATCTTGAATCATCTATCTCAAACCAAGAAAAAGATATTGAAAACGATTATGTAGGATCAGACAGTGAAAAGAATAGTAAGGGTATAAAGAAAAAGAAAGACAAGAACAAGATGGAGGCAGAACTTAATTTCTTACTAAGAAATTTTTTGATTTTACATTTAAATTGGAATAATTTCTTAGGTCAAAGAATATTTAACAATGTCAAAGTATATTGTCTCCTGATTAGATTAA
GmaAffx.40242.1.A1_s_at	BE820856	At3g51120	2e-14	Unclassified - Hypothetical Protein NOT Supported by cDNA			GCAGTGATCGATTTTCTGTGTCCAGAGATCGGGGTTTTCAAGGTCATGGTAGGGAATCAGGTTTTAGTAGAAGCAGAATTCCATATAACAGGCAACCGTCATATGGTGTTGGAAATGGAGGATCATATAGGCCTCTGCCCAAAGGGCAGCGAGTTTGTAAATTTTATGAAAGTGGGTACTGTAAGAAGGGAGCATCCTGTGATTACTGGCACCCATGATTTTAGATTCCATTAGCACTGGTCACACTTGTTTTTTTTGTAATCCTTAACATATCTGAAGTTGGCTCTT
GmaAffx.41354.1.S1_at	BI786979	At5g60570	2e-89	Unclassified - Hypothetical Protein NOT Supported by cDNA			GCCTTGAATTGTCTTGCTTGGTTTTGTGGATCTGATTATGCCGTGCTATCGTGTATTAATAAAAGGTTCAATAAACTGATCAATAGTGGGTATCTATATGGGTTGAGGAAACAATTGGGGGCTGNGGAGCATTTGGTGTATATGGNTTGTGATCCAAGAGGNTGGGTGGCCTTTGACCCCAAGATAAACAGGNGGATTTCTTTACCTAAGATACCTTGTGATGAGTGCTTTAATCATNCAGACAAGGAGNCCTTGGCCGTGGGCTGCGAACTGNTGGTCTTCGGTCGAGAATTGATGGAGTTTGCCATTTGGAAGTATAGCATGATTTGTCGTGGTTGGGTGAAGTGCCAGGAGATGAACCAACCCCGTTGTTTGTTTGGATCTAGTAGTCTTGGTTCG…
Gma.6094.1.S1_at	BQ611469	At2g26920	3e-11	Unclassified - Hypothetical Protein NOT Supported by cDNA			ATAGAACAGGTGCAACTCCACCGCTTGCTGCTGCTACTTCTCTAGGACTCTTTTCTGGTCTAGGATCAGCAGGCCCATCAGGGGCTTCTTCTCCAGTAGACTGGAGCACTGGTGGGACAATGCAGTTCGATTATACCAACATAGACTGGTCCTTGGATAGAAGTTTAGCTTCACCAAGGTCAAACGGTTTATGGCTAGGATTTTCACCGTTTTTAAGGAGTAATAGTGCTCCGATGTATGATGCAAATACTTCAGGAGTTGTAGCTCAATCATCAATGAGACCAGTGCCCTCAAATGGGAGCATGAATGCTCCCATGCCTGGATTGCAAGATGGTGGAGTAGCTTCTGCTGAGACATC
Gma.6024.1.S1_s_at	CD397288	At1g20760	2e-32	Unclassified - Hypothetical Protein NOT Supported by cDNA			TAGCAGCAAGGATTTTGGCTACAATAATCATAAATTCACAAGGTTTGACTCCATAAGTAGCAGCAAGGATTTTGGCTCCAATCCTGAGACGCTCACAAGGTTTGATTCCATGAGTAGCAGCAACGATTTTGGCTTTGGTCGTCAGGGACATGCAAGGTTTGACTCAATTAGTAGCACCAAGGACTTCGGTCACAGTGGTCCATTCTCTTTTGATGACTCTGATCCATTCGGCTCCTCTGGCCCTTTTAAGGTCTCTTCTGAAAATCATTCTCCGAAGAAAGGTTCAGATAACTGGAGTGCATTCTAGCCTG
Gma.5957.1.S1_at	BM092059	At5g37370	2e-10	Unclassified - Hypothetical Protein NOT Supported by cDNA			AAGCAGCCGGGATTATGACAATGGTAGTAAGCACTATCGTAGGAGCAGGAGTCGGAGTAGAAGTCGGAGCCTGCAAGCTGGCACTGCTCAGTATGAATCACGTTCTAGTCCTCAGAGAGAGGAGAGTAAGAGAACTTCTGCTTCGAGTAATCTAGCTCAACTTAAAGACATGTATGGTGATTTAGGGGATAATAAAGGAGATGCCAACATGGAAAGAATTCCTAGAAAGGATAGTGGAGGTGAAGAGGTTATTAGACTTGGCGGGTCTACTTGGAAGTATTGAAAGTTATCATGGAATGCTTGTATCAGATGTTGGATGGATTTCATGGAGAAAAATATTGGGACTAGCCCTTTTGTTGCCAGATGTTTAGATTGGTGAATGCTATCATTAACATTTAT…
Gma.5965.1.S1_at	BQ610665	At1g16180	7e-07	Unclassified - Hypothetical Protein NOT Supported by cDNA			ATATCTGGAGTCTATTGGCTCCTTTGCTATTCCCTGATCGTGAATTTGTTTGACTCTCTCATCGCTAGATTACTATACTCTATGACATTCTCGTTGTTGGTGTTTTGGTATTGTAAGTTATGACCTTCAATGTCTACATCTTGGAATCTTGTGTGTTGCTTGCAATACATGATATATGTATAGATTCACCACTTCATGTGAGATGTA
Gma.6370.2.S1_a_at	BE346886	At2g23970	5e-59	Unclassified - Hypothetical Protein NOT Supported by cDNA			TAAACGTGTCATCATCTTTACCCTTGGCTTTCTCATNCTCTTAAGNNCTCCCATCAAAGCTTTCCATTTACAAATGTCACCGGGATGNGATCCTAGAGCTCCCTCCAAAAGCAGAGGTGATTGCTTGGTCAGAAATGACTGGAGTTGAGATGTTTAGCTATGGAGACCACATGTTTGGCATCCAAGGCCACCCGGAATTCACCTATGACCTTCTCTTGTTCTTTATTGACCGTATTATTCAGCGAAATTTGGTCCAGGA
Gma.6221.1.S1_a_at	AW350898	At1g32130	1e-108	Unclassified - Hypothetical Protein NOT Supported by cDNA			AAATTGCAGCAATTGAGGGCACCAAAAAAGAAGCAGCTTCAGGCTACAAAANTGAGCGTGGAAGGTCGTGGTATGATCAAATATTTATAAATGTGACCACGTTGATACTGGATGGGTTTGTTTGTCCTGCTGCAAGCT
Gma.6535.1.S1_at	BM953776	At5g15270	2e-44	Unclassified - Hypothetical Protein NOT Supported by cDNA			GTTCTATGAAGCCTGAAGCCCACTGCCTAAACNGGAAGACCAGATCAACCAGGTTTTGACAAACTCATGGCCCACCTTGACACCTCTACCTAGGGGACCAAACATGTGGAGACTATTGANATTGGCCANTGTCCATTTTACCTTATTTCACAAGCTTGATAACTAATGCTCCCCCAAGAACCTATAAAGCTGGCTTGCCNTTTTGGCTGCTTTTCAATTCCTGTTCAGTTGTCTTTAGATTTAAAGCACCATGTAGCTATGATCCTTTGACAGTTGTATACCTATATTGTCATTATGATTGGGTTTTGTTTTCATGACAGTTCAGTGTTACTTGCAAAGCGAACTTTNNTAGTTATTTTAATNAAAANTATGTTNNNTCCTGGTAAAANNNNANNNACT…
Gma.6423.1.S1_at	BI469981	At3g25400	1e-38	Unclassified - Hypothetical Protein NOT Supported by cDNA			GCAATTAATGGCTCAGTTCGCCAAAGAGAGAGACTGGGACCGTTTTCACAGCCCAAGAAACCTTCTTTTGGCTCTGGTGGGTGAAGTANGAGAATTGTCTGAGATATTTCAGTGGAAAGGTGAGGTTCCAAAGGGTCTTCCAGATTGGAAAGAGGAGGAAAAGGTTCATCTTGGGGAAGAGCTTTCTGATGTGTTGCTTTACCTTGTCAGGCTCTCTGACATTTGTGGCGTTGATCTTGGTAAAGCTGCTTTACGAAAGGTTCAACTCAATGCCATCAAATATCCTGCAAAAGTTTGCAAAGAGGAGGAGGTGGTGGTTTCAATTTCAAGCAACCAAGAGGAAGAAAAAAACCCTTCCACCAATAATAATGGCACTGCCACTGAATCTGATGCTGACTG…
Gma.6688.1.S1_at	BE658757	At1g11060	1e-44	Unclassified - Hypothetical Protein NOT Supported by cDNA			TTGTGGAAGCTTATTCTGCGCTGCTTCTAGCATTTCTTTCCACTGAAAGTAAGAGCATNCGTGCAGCAATTGCTGACAATCTTCCAGACCAGAACTTAGCAAGTCTTGTACCTGTGTTGGACAGATTTGTGGAATTCCATCTATCATTGAACATGATTTCGCCGGAGACTCATAAAGCTGTCAGNGAGGTNATTGAATCGTGTAGAATTCGATGAAANNNNNNGCTCAAANGGAAANCTCTGTACAGCCACAGCATAATTTAGGGTTTGTTGTGAGGAAATGGGACTCCGTTACACGAGTCTGACCAACTTTTATTCTCTGCTCACAGCCCTTATACCCTTATTCTTGTATCACCATGCTGGTGATGATGCTGAGTTGCTTGTATACAAAAAAAGATCA…
Gma.6728.1.S1_at	AW509462	At4g28830	1e-80	Unclassified - Hypothetical Protein NOT Supported by cDNA			GAACTTGAGGTTGACATCGATTTTATTCAGTCTAATGTCATGGACTTGGGATGGAGAGGTCGAATTGTTGATACAGTTATAATGAATCCTCCATTTGGTACTCGGAAAAAAGGTGCAGATTTGGATTTTCTCTCCGTTGCTNTGAAGGTTGCTTCTCAAGCTGTTTATTCCTTGCATAAGACTTCAACAAGAGATCATGTGAAACGAACAGCATTAAGGGATTTCAATGCTAGCAGTGCTGAAGTNNNNNNNGAGCTTCGATATGATGTNCCNNNNNTNNNCAAATTTCATAAGAAGAAGGAAGTAGATATTGCTGTGGACCTNTGGCGTTTTGTACCAGCAGCAAGTCATCAAAGCAGAAATACTTGATGCAGACAAGGATAGTGTATTTTGGAATAG…
Gma.682.1.S1_at	CD393902	At1g63830	9e-84	Unclassified - Hypothetical Protein NOT Supported by cDNA			TCCTTCGGTTGGGTATGCACCACAACCAGCTTATGGACAGCCTGCTCAAGGATATCCTGCTCCGGGTTATCCTCCTACTGGTTACCCCCCTGCTGCTTATCCTCCACCAGGATATCCCCCTTCTGGCTACCCTAAGTGATTGGTCTACAGCGCACCAATTGATCGTGCTTCATAGAACAAGGGAACATGTTTGTGGTGAAATACAACAGNTCGATTGATTAATTAATTTCCATTAGTCTTATAATTCGTGAATTAACCTTATAATCCCTATCGTGATGTCCATTCTGATACTTCGACTTCTGTTTGTATATTGTTCCCGTTGGTGTTCATACATAGTTCACATGTTTNNNNNNTTATGTGCAAATACCTGGTGTAATGTGCTGTTCCATTATTTTTTTT…
Gma.7562.1.A1_at	BQ298534	At5g12080	8e-18	Unclassified - Hypothetical Protein NOT Supported by cDNA			AATCCACAATACTGGCATCCCAATCATGGCTTAGTAGTGAAGGAGCTTGAAGATGTAANCAAGATTAAGATGGGTCTTAATGTTACCCACACAATGAACTTTCAAGAGTTTGGGGAGAAAACCAAGCGAAGAACTGAACTGGTGATGGAATTAAAGAAAATATTTGAAGAGCTCAATATCAGATACAACCTTCTTCCTCAAGGCATTCATCTTAGACATATTGAATCAAACTCAAGTTTGCTCAATATATGATTCAGCTGCATGCATGTGTGCCTCCTATGTTTCATTTCATCTGTCAAATACCACCAGACCTTTTCTTTGGTTGATTTAATTCATGATAGTTGGGAGTGGTGCTTTAGTAAAGTATATATATAGGGCCTTGATTAACAGACAGTATTA…
Gma.7417.1.S1_at	CD413494	At1g26300	4e-67	Unclassified - Hypothetical Protein NOT Supported by cDNA			GTTTAGGACTCTCCCAATTACTTATTGGTTGAGAGACTGAAGTAAAAATGAACTTTGCTGCTTGCAACTATCCCTGAGATATCAGTAAAGACAAACGGTTGTAGCAGCCTGGAATTAAAGAATGTTGACTGTAGTACTATGTAGATTTGGTGAATTGGTCAGAAAACTGAAGTAATTCGTCATTGTTTATTTGTTTACCTTAATACCCTATATAGTGGCAGATTAATTTTGGATAAAATAGTGGTGCTGAGCCCTGTTGCCTTGTACAGTTGACCTTGGTCGTTGATGTTTCTTTCAATTTGTAAACTGCTTTAGANCTCTTCGAACATATTGTCGCTTCTTCTTCATTCAGTGAAAATG
Gma.7711.1.A1_at	BE658426	At5g14170	1e-37	Unclassified - Hypothetical Protein NOT Supported by cDNA			GTATCCGGAGAACCTAGTCGCAATGCAGAAAAAGAGCGTCGTTCAGATTTCTTCAACCAACCATGGGTTGAAGATGCTGTTATTCGTTACCTGAATCGCAAACCAGCTGCGGGAAGTGATGCTCCAGGAAGCACATGACTCCAGTCCATATTTTAGTCGTTCATTATCCCTTTTGGCGATGTATTTGAAGATATATACCATGAGAATTTCTGAAGTAGCTAGTTTTCCAACTTCCATTCTGNATTNNNNNCNNGAAAGAATGCTGCTCCATAGTGATAATATACAATATGTTGTTGTATGGGTAGTGTGATCACATTTAGTTGCAGTGCTGATAATTGCTTGTTAGGTGATAAATGGTACCACAGTTTCACGTCTTAGTTGTAGTCAACTGTGGTGGAT…
Gma.6935.1.S1_at	AW318268	At1g58230	4e-79	Unclassified - Hypothetical Protein NOT Supported by cDNA			TGATGACTGTTTCAGGTGCACCCACTGACAATTGACAACATATTTGGGGTTATATGCTAAATTGCTGATATCACTTACGTGGTGATCTTCTCATTTTCTTCCTTTGGCTGTTTTGTGTATCATCCCCGTGAAGTGCTTGTGGATACTGTGAGATCAGAGATGAGTGAGTACCAGCTTTACCTGAATATAGAAAGCAGCAGCATATCTACTTCTTTTGTACTGTGGAATAGAAGAACTGGNNNNNGNNTCNNCTACTTTCTAAGCTCCTGGAATTAGGGAGGTAAAGACTTGGCGGGTTTGGTCATACATGTACATTATATTCGTTAATTCTTCAATAGGATTCTTGTGAACTAAAATTGTAGCTGTGCTATTATTTTTGGTTTTCTCTGTTAACACTTG…
Gma.7179.1.S1_at	AW348714	At3g54230	1e-33	Unclassified - Hypothetical Protein NOT Supported by cDNA			TGGTGGAGGACGCATAGTTGGAGATGCCAACCTTGATACTTTTGAGGTGATTACGGCNGANAAAGCAATTGANGAAAACAATGTTGGTAATCGGATGCTTCGCAACATGGGCTGGCANGAAGGATTGNNNNNNNNNNNNNNNNGGACTAGGAAAGGATGGGAGTGGAATGATAGAGCCTGTCCTGGCACAAGCCACNGAAAATAGGGCAGGACTTGGGAGTCAACAGAAGAAGTTGGATCCTAGCCTTGAGGTGCANGCAGGGGACAGTTACAAGATGCTTATTCATAAAAAAGCACTTGCCAGGTTTCGGGNGATGTCAGAGAGTTAAGNTTTNAGCACAGNATATAGGANNNGNNTTAGCTTNGATAANTNTATTATTTAGATGTTNTATNAATATT…
Gma.7161.1.S1_at	BU545192	At1g67480	1e-104	Unclassified - Hypothetical Protein NOT Supported by cDNA			TGATGTCTACAACCCTGAGAAGCACGGGTGGTGTGAGATGAAAAATGGGTGTGTCATGGTCACTGCTTATGCAGTGCTGGAAAAGAAGTTGTTCTGCATGGAGTGGAAGAACCAGCGGAAGTTGGCAATATTCAATCCAGAGGACAATTCATGGAAAATGGTACCAGTCCCTTTGACAGGGAGTTCAAGCATTGGTTTTCGGTTCGGGATATTGGATGGTAAGTTGTTGCTTTTCTCACTGGAGGAAGAGCCTTCATATAAGACTTTGTTGTATGATCCAAATGCAGCACCAGGATCTGAGTGGCACACCTCTGATATAAGACCATCTGGTTTGTGTTTATGCAGTGTAACTATTAAGGCCTGAAAAGTTGGCTGATTCAGAATTTAGAGACCTTGAGG…
Gma.8009.1.S1_at	AW185849	At3g08620	1e-29	Unclassified - Hypothetical Protein NOT Supported by cDNA			GATTGCTGGGAATATCTTCCAGTACATGNNNTCTCATTCAATGCAAGCTATAAAAGAATAGGCTAACAATTCTTGCTGGTTAGCACTCTGGTGGTTTTTCCTTCCCCTTTGTCCCTACCTTTTTCTTNTTGAACAGACAGGAGACAAAGCTGGAATGAAGAATTTTTAAAAGAGAACAATTATATAGTTGGGGTATTGAGAATAGGTTTGTTCAAACCAACCCTTTTTTTTTCTCCCTTGCAAACTTAATACATTCATTGGATTTATTCATGCGTCANNNACNNNNNNNNNNNNNTGGAATATATACATGTGATGGTTGGTGGTGATGAAGTTTTAGGTCCTANGACAATGCAGTGTTTATTGGCATGTGACATTGTCAAAGTCTCATGGTATTTTAAT…
Gma.8314.1.A1_at	BI967176	At4g39840	1e-28	Unclassified - Hypothetical Protein NOT Supported by cDNA			TGCTCCTGTTCTCCACGGACTGTGGCCTGGCCTCCAAGTTCTTGGGCCTGGCTCAGGTCTTCGTCGGCTTCGCCGTTGGGCTGCATTATTACGTCACGGTCTTTCACAGGGTCGTGCTGCAGCAACCGCCCAAGACCAATTGGAAGATCCACGCCATTTACGCCACGTGTT
Gma.8970.1.S1_at	BU765876	At3g51460	3e-89	Unclassified - Hypothetical Protein NOT Supported by cDNA			TATAGCTTCATTTCCTCTGGCTTTGGGTCTGGTTNTGACTGGNTTCCTCTTTGCAACCATGTCACTGAGGCAAGTTCNATATGATTTCCGGCACNTCTTCTTTTCGCTANTGTGGGCGGGCATTAGCATCGGCATAGCAGCATTTGTGAGGGCCAATGGCCGTGTTTTCTGCAACAGNCCNCGCCTACANNNNNCCCGGTGATAACTTCTATTCAGACNAGTTTGNGCAATTNNNNNNNNNNNNTGAAGTGTNCAGCTTCNGCAGCAGNAGTCACNGGCAGAGGCCTTAGTTCTACATCTAGATCACTTTAACGATCAATATTTACATGAGGCTCCTTCTTGAAGCTTATTATATTTATTCTTTCTTACTAATTTGTAATCANTGTAGCTTCCAGATNT…
Gma.9000.1.S1_at	AI855975	At2g25970	1e-103	Unclassified - Hypothetical Protein NOT Supported by cDNA			CCCGTCATATGGTGGTGCCCCAGCAGGTGGTCAACCTGGTTATGGCCAGGCTCCTCCATCGTACAGCAACAGTTCTTATGGTGCTGCTGGTTACGCTCAGCCTCCAGTATATTCCAGCGATGGTAATGTAGGTGGGACTACTCGTGGAGCCTATGATGGAGCACCTGCACAGCCTGTTCAACAGGCTGCTAAAACGTCTCCTCAGTTGATATAGTATAGGTTGTCAAATTTGGATCTTTCTGAATTGTCTGTTTTAATTTTATTGTAGTAGTGACGCATTTACATAGCTTTGCAGTGTTGAGATGGATGCATTATATACACTTTATTCTGTTGTCTTAAATTACGAATTCCTTTGTATGCGTGTTACTATTCCGAGAAAATTAAAGCATGAGTTGGAAT…
Gma.8661.1.A1_at	BE659350	At1g75310	1e-14	Unclassified - Hypothetical Protein NOT Supported by cDNA			GAAGTACACAATGTTGAGCTGTCTGATGGCAATGCGCGCGCGTTTGCGACGATTCAAGTGTATTTATTTTTATTATTGTTACTGTATGAAAAGTAAGCTCAAAGCAATCAGCCAATATTGATGGGCTGCATGTGAAACTTTAATGTATAGCTCAACATGTACCGTTCTACATTTTTATTAATTCCTTTCCACCTATAATAGGCCTTT
Gma.9264.1.S1_at	AW704957	At3g07090	1e-15	Unclassified - Hypothetical Protein NOT Supported by cDNA			AAGTACCTCCAACTCATCCAGTGAGAATGGGGTGAGCAGAGAGGTGAACAAGGAAGTGAAGGGCAAAGATGAAAACTCTAAGGCAGCACCTTCTGCAAACACAACAGGGCAACCACAAAAGCCATCACTAAATGGGGTCACAGCAGACCCTCTTGGAGATGCACGCAACAAGGTTCAAGATGAGATTCTCAAAGAGTTTGCTGCAATTATGGCAAGTGGGACAATGCGTGCTAGTGAGGCTGCAGCTCTAGCCACTAAAAGAGTCATGCAAAGATACGGCCATACTACTGCTGTGTCTCAGAATTAGCTACTTTTCTTCATCAGAAAACGATTTGTGGGTCTAAAACCTCTACTTACTATCACTGC
Gma.9320.1.A1_at	CD418306	At1g47720	3e-17	Unclassified - Hypothetical Protein NOT Supported by cDNA			GTGTCATCATCGCAGGGTCAAGAGTTTGATTTTGCGATGGCTGGTAGTGGTAGGAAAGTGAGCAATGCTGCAAACAGTACTGGTTCTGTGGTGGAAACATGGAATGCGTTCTTTGCTAACCCAGGGGAGTGGTGGGACAATAGGAACAACAAGAGGAATCCAAAAGCTCCTGATTTCAAACACAAAGATACAGGGGAAGCTCTGTGGATCGAAGGCAGATACAATCCGCCATGGGTCAAGTCTCAACTGGAAATACTAGACTCAAGAATGGGGTCGTTTGCTAGTCAAAATGCTAGGATGCCTGTAGGTATGGTAGCTGCAGATGAAATTGTGTCTTTCTAATGGCTCATGCCAAATCTCGCCCATGTAATATTCAATTTTAACTGTGAAACTTCTTTG…
GmaAffx.11076.1.S1_at	AW351049	At5g62440	1e-41	Unclassified - Hypothetical Protein NOT Supported by cDNA			AGTGGTTCCGTGAACTTGGGATTCAAGAGCTTCGNTTCTTCCTNGGAGATGTTTCATTACTTCTACAACTTTCTNCATACCTGGCCTCAATATCTCNNTGTTAACAAGTATGAACATCTGATGTTGTTGGAGTTGCTTAAGAACGGCCATGCAGAGCCNGANAAAAAGATTGGTGGAGGGGTTCGNGCTTTCCAAGTCCGCAAGCATCCTACCTTCAAAAGCAGGTGCTTTTTCCTCATCAGGGAGGATGACTCTGCTGATGATTTTAGCTTCAGGAAGTGTGTGGATCACATTCTNCCCTTGCCGGAAGAGATGCATTTGAAATTTGATGCGAACAAGGCATTGGGTGGTGGTGGTGGTGGAGGAGGAAAGCATTATGGAGGAGGAAAGGGTGGCAGA…
GmaAffx.10720.1.S1_at	BU765494	At3g06170	2e-53	Unclassified - Hypothetical Protein NOT Supported by cDNA			TGTATTCTGCTCTTCGGGCTGGATAGTCGACCACATTCTTATCACCACAATCTTCACCTAGAATGGTTGGGAGCAAACCTCTCCTTGAAGAAGCAGAAGAAGGAAAGGCAAAGGAGGAAAAGGAAGCACAACCCGTTATCTATTCGTATTCATTCTTCCACCAAATATTTGCCCTGGCTAGCATGTATTCAGCCATGCTTCTTTCTGGATGGACCAGTACATCTGAGAGCTAAGATCTCATAGATGTTGGTTGGACCTCAGTTTGGGTTCGAATCGGCACCGAGTGGGTCACTGCTGGATTGTATATCTGGATCGTGAATTTGCTTAGCTCTCTCATATTACTGTAT
GmaAffx.10583.1.A1_at	BU551095	At3g23880	0.002	Unclassified - Hypothetical Protein NOT Supported by cDNA			AGAAATGGCACTTCTAAAATCCCCGATATTCAAGACATCTACATGTATATGACCCCAGAGGTCTATATTGAGAGTTTGATATCACCTTGTGTTTAGTATTAGGATGTAGATGCTATACTATGTCACTGGTGCATGAGGTTGTTGTTGAATCCACTAACTGCACTTTTAAATGTTTAAATGTGTTATGAATGCTATGTTGTTCTAATCACTGGTTGCAATGTAATTAGGAGATGTTTTGCCAAGTCACTAGTACGTTTGTTTG
GmaAffx.15753.1.S1_at	BG405692	At3g52950	3e-14	Unclassified - Hypothetical Protein NOT Supported by cDNA			GCAACAACTCCAAAATCTTGTACAGACACTAGACAGAAAACTAGTGCTTTGTCTATGCGCTCTAGTATTTTTGCAAGTGCAATTGTTATAACAAGTATTGGCGTGTTGGTCTACTTAAANCGCTCCAAACAGTGATGTGTTGCCAGTTTGGTGAGNNAAAAAAANNNNNNNGCAATAATCGCTCTGTATGAGTTCAAGAGCACTATTGCCTTTTAAAGGCTCAT
GmaAffx.16585.1.S1_at	AW569316	At2g47850	2e-67	Unclassified - Hypothetical Protein NOT Supported by cDNA			AATAGTTCTGGTACTTCTGTCGGTCTAATTTTCTCACAAGGTGGGTCTGTCTCGCTATCTGATGTGCAACTCTCAAGTCAGAGTAATGCCCCTCCAAACAGTAGCAGAAGCACCAGACAAAGCGGTGAAATACGTTGACCTGACTCGTACAAACTTGAAAATAAGTCCTCGTTATATATTGGATGTGATTTCACAAGCCTTCATTACTTCTGTCTATAGTCCTCAGTATTTTGATGGCAACTGTTCAAAGTTTCTCTATCGCTGTTGAGAATTCATCGTCCAATTCTGCTTAGAAGCCATACTACGTCATTATTCTCTTTTATGCTTATGCTCACCCCATCTGATTATATTATTATCTCAAATAAGCTTCAATAGAAAACTTCATATTGTCTATTCGTT…
Gma.17500.1.S1_at	BG881677	At1g22870	2e-98	Unclassified - Hypothetical Protein NOT Supported by cDNA			CAGCCACCCCTTTTGGATTTGTTGGGGTAGCTTGCTTCTATTATTGTTCACGTATTAGGGTGAGTTACTGTTGAGATTGTACATTTTATGCAACATCCTATGTTGAGTGCTTGGAGACATTTATTGTGAAGGGAGATTTCAGAAAATCTTGCCAGGTAACATGTTTTAAGGGACGGCTACTCTTTGTAAAGGTTTTGTTGTATGTTGCTTAGTCTATAGTGATTTTGCAAAATTTGGCTTAATATTTTTTATTTTTTTGTCCTCGCTTCATACTTCATTCTTANGGCATCANGCAAAGTGTATTANAAGAAGTCCTGATTACTGTGACTGGGTTGAAAATAATAAAGGCTGTCATGAAGTATCTTCTGTAACAAGGATTTGAATTCCGTTATGTACGAC…
Gma.1761.1.A1_at	BQ454208	At1g15780	0.0001	Unclassified - Hypothetical Protein NOT Supported by cDNA			TGCCGTTCCATGCAAACATCTTTTTTCCTCTTAAATTTGCCNAAACTTGTGTCAATCATTGGATACGGAGTTTTTGGGTGCANGNGAAAAGCGATCATGCATCAGGTCAAATTGGTCTCGTTTCAGTGAATTGTGTATTCAGTTAGTATCCCATTTTCTTGCTTATTTTTACGCTCAAATTGCGATGTTTGCCGCTGCCTAAGACGCTCAATGTAGTAAGATTTGTGTGACTTGAATCAAATTGCCTTCACCAAGGCTTTGTTAATAACTAATATAGTAGCTCAACAGTAAGGCCCGTA
Gma.1694.1.S1_at	BE609625	At4g32270	1e-28	Unclassified - Hypothetical Protein NOT Supported by cDNA			GAATTACTGTATTTTTCTGAACACAACACTAAATTCAGCTGTGACACAGACAATTTGTGGTAATCTGAAGGATCTCTTTACTATTGGCCTTGGCTGGATAATTTTTGGTGGGCTACCATTTGATTTTTGGAATATAATTGGGCAATTTCTCGGTTTTGCCGGATCTGGCTTATACGCCTACTACAAGCTCATTGGCAAGTAACTTATTCAAGTCCTCTAGATGATGTCTTTTTTTCAATTTGGGAGTGCCATGTGCTTCAGTCTTCTGCCCATCTCTGCATCCCTTGAGAAGGGAGAAGAATCTGAATCAAACTCAGGTTTGGGAACTTGTGATCGACTAATCTTATACTATGGGGAAGTTTTGCTAATACAAGTTGACATACAAACAGTTTCTGGGGA…
Gma.16352.1.S1_at	BI970434	At1g18560	4e-11	Unclassified - Hypothetical Protein NOT Supported by cDNA			AATGAAGTCTGAACTGGACCAGTATCTGGAAGAATCGCTGTTGCCACGTGTTCCAGACTTTGATGTATTGGGTTGGTGGAAGCTAAACAAACTCAAGTACCCTACTCTTTCCAAGATGGCTCGGGATATACTGTCTGTTCCGGTTTCAAGTCTTCCTCCTGAATCTGTCTTTGATACAAAAGTCAAAGAGATGGATCAGTATAGAAGTTCCTTGCGGCCAGAGACAGTGGAGGCCCTTGTATGTGCGAAAGACTGGATGCAGTATGGAGCAGCCGAAGCTTCCAATGCGCTCGTGAAGATGGAGNNCNAGATTTTATTCATGTTACTTCTTTTAGGTGGNTGNACTCGTTATGTTGGTAGGTTCTTGTATTTTNCTTGTAGTTCCCAGTTCTCTGTTAG…
Gma.16456.1.A1_at	BE823704	At2g43630	0.0001	Unclassified - Hypothetical Protein NOT Supported by cDNA			TGCTGATTACCGTGAAGCCCTTAAAAACTACTTGCTATCAGGTACAGATGAGGCCATTGCCACCAGGAATTACTTAGAATTAGATTCAGATGCAGACGTTAGGTATTGCTTGGAATCAGATGACGAAGAAGANGAAGATGAAGATCAATATCAATATAAAGATGATTATGAAGAAAAGTTTGCCTAGAGTCCGGAGCAACTTCTATTGCTCTCCATCTATTTTCCCCTCCTCAAGTTTAATAAAGCTTTGTATACGTTGTATCATCATGCTTGTAGTGTATTGCCCTTTCT
Gma.14308.1.S1_at	BU089801	At4g09580	1e-107	Unclassified - Hypothetical Protein NOT Supported by cDNA			ATATTACTGTCAGAGCTGGCCTTGCNCTTGGGGATCTAAAGTCAATTAAGGATCTATATGATTTTAAGACNTTATCNGTACTTTTCCTCATTGGTTTTGTTTCCATAGCTCCAACACTTNTGAAGCGGAAGCGAGTATATGAATNAAGGTTTCCTGGCTCAGNTTGCACAATCNANTTTGTCAAAAGGCAAGTTACGNGATCTAATTAGATGNTGANGACANTGGATCAGAGAAGATAATATTTAAGAAAGATATCCATGAAAANGGANNNATNGTNATTNNGTTATTAACTTAAACAGTGGCATATGCNCCATTTTATTTTCTGTGGTGGAGCCTAAGTNTTTTTGTTTCCCTTTTNNTTTTTTGATNGTGTGGAGAGAGTAAGGNTAGACTTAGCTG…
Gma.1463.1.S1_at	CD409674	At5g55230	4e-70	Unclassified - Hypothetical Protein NOT Supported by cDNA			AAGCATCACGAGCAGCGAAACACGGAACAAGAAACCATCTTTGGTTCAAGACCCAGCCCTGCTAGGCCAGTTAGTTCCAGTAAGTCAGGAGGTCCTCGTGCTAACGGAGGAGCCAATGNTACTCCTAACCGACGGCTATCGCTTAATGCNCATNAAAATGGAAACAGGTCCACATCAAAAGATGGAAAAAGGGANAACAGACTATCTGCTCCNGTGAATTATGTGGCCATATCAAAAGAAGATGCTGCTTCCCATGTTTCTGGTACTGAACCCATCCCGGCATCACCCTAATAACGAGATCTTCATTTTCAACCCTATAATTTCATCTTTGTAGCATTGTCAAATTACTAGTTACTGCTTTAGGAATTATAATATGGGAGTGACANAGTAATTAGAGAG…
Gma.15233.1.S1_at	CD398582	At5g50400	0	Unclassified - Hypothetical Protein NOT Supported by cDNA			GAAAGCATCAACCATGGCTAATCTTTTCAGCTCATCGTCCCCTTGGCTACTCCTCTAATCTTTGGTATGGCATGGAGGGTTCATTTGAAGAGCCCATGGGAAGGGAAAGTTTGCAGAAGCTTTGGCAAAAGTACAAAGTAGACATTGGATTTTATGGTCATGTCCATAACTATGAAAGAGTATGCCCCATTTATCAGAATCAATGTGTGAATGAAGAAAAGCATCACTACTCTGGCACTGTGAATGGAACAATTCATGTGGTTGTTGGTGGAGGGGGAAGTCACCTGTCAGACTTCACACCATCACCCCCTATTTGGAGTCTTTATAGGGACGTTGACTATGGGTTTGGCAAATTGACTGCTTTCAATCATTCATATCTCTTGTTTGAGTACAAGAAAA…
Gma.12973.1.S1_at	CD393561	At3g27100	2e-27	Unclassified - Hypothetical Protein NOT Supported by cDNA			TCTCTAACCATCGTATCTGCAACTTCAACTAACTTTTATNAAGCCGAAGGCGTCAGTGAATCGACCCCCCACACCAGATGTGGCCGAAAATGCCCCTGAAAGGGAACCCACGCTTCAAGAGCTCATCAACATCAAGTTGATCGAGACCGGAGAGAAGGAGCGTCTCATGGAGCTGTTGAGGGAAAGGCTTGTTGATTGCGGTTGGAAGGATGAAATGAAAACTCTNCTNGCAGAGCCGTTGTGAAGAAGAAAGGGAGGAATAATGTTACTGTTGATGAACTTATACATGTAATCACTCCAAAGGGACGAGCCTCGATTCCTGATTCCGTAAAGGCCGAGTTGTTGCAGAGGATTCAAACGTTTCTTGTGTCTGCTGCACTTTAAGATATCTCCATGGCT…
Gma.14089.3.A1_at	CD415643	At1g50500	1e-09	Unclassified - Hypothetical Protein NOT Supported by cDNA			GAAAGCTGGGCCTTTCCGGAATCTCTTTAATCCATAATGAAGAGAGTGCTACAACCCTAATTTTTTGGCCAGAGCCCATGAGCTTTGAGTTATTTTTTTTTTTTATAAAAAATTAGTTTTCTGTTTCTTTTTGCTTTTCTTCTCTTTGATTCTTTATGTAAGTTTAGTATCATGTTTATTGGGTTTCGCTCAATCATCTGACAGCTGTTAATAAAGAGATCTAC
Gma.1442.1.S1_s_at	CD407234	At5g12240	8e-08	Unclassified - Hypothetical Protein NOT Supported by cDNA			TTAATCAACAAGATTCATTTTGGAGCAAGCTAAAGTCNGAGGCTGCTAGGAAGGTGGGTGCAGAAGAAGCGGAGAGATTTTGCAAGNCNTTCCAACAAATCCATAAGAAACTAGTCAATGAAGAGTTGAGTTTAGATGCTGCTCGAAGCTTCTTAAANTCATCCTAGAGTTCTAAAGAATCACGCATGCTTTCGACATTTCTTNNTGATTNAACAATCAGCCNNNNNNNNATNGTAATTCTTTTGTACTGTATCAAAGTATT
Gma.15733.1.A1_at	CD402886	At5g60570	5e-44	Unclassified - Hypothetical Protein NOT Supported by cDNA			GGGAAGGCTTCCAGTACGTGCCGATTCTTCTAATGGATGGGGCCTGGCTTTCAAGGCTTGTGGAGAGAAACTTCTGGTTGTGAGTGGACAAAGGAGTCCAGAAGGTGAAGCTGTTGTACTGAATTCATGGTGTCCTAGGACAGGAGTCAGGAATGGAACCATAGATTGGCAAGTACTTGGTGTGAAGGAGCATGTTGGGGTGTTTGTGTACAATTGTGCTGTTATGGGATGGTTTGGTGAAGTGCTTTTAGATTGACTCAGTAGAAGATTTGCTGGTATCTACAATCTGACATAGCTTTGAGGGGTGCTTCCGTGTTGATTCATCTCATTTACCAAGTTAATTGTCCCTGGGATAGCCTTCCCTTGATGAGAATTGGGGTTTCTACCTTTGGCATCTGT…
Gma.15891.2.S1_s_at	BI316425	At1g22800	4e-30	Unclassified - Hypothetical Protein NOT Supported by cDNA			ACGGCACTGTACCTGCAACATTCCAGGTTATATACATGACGGGGTGGAGAGAACATCCTTCTCAGCAGAAAGCAAAAAGAAGGGGATCAGCCACTATATCTTTCAACGATATTCAGAAGCAATTTGGAAGCCAAAATTGATTGTCCTTCCCCTTATTTTTCACTCTGCATATTTTAGTTTAATTAATATACTTGGCGCATTGTATGTGTGGGTATACTCTTA
Gma.10639.1.S1_at	BI470008	At2g41010	3e-27	Unclassified - Hypothetical Protein NOT Supported by cDNA			TGGAAAGTCATGTGATAAAGAAAGAAGAGAAAAAAAAAANTTGAGAATATGAGATGAGATAGATTCTCTGAAAATTTTCTTTTTNCTTTTTCCCTTTTTGCCCCTCTCGTGGGTTAATGAATCTAGCAGGGGAAGCTAGCTAGGATGATCTTATGTAAATTTGGGAAGGGAAAATGGATATGGAACTAGTATCTCTNTNTTTTTTTTNNNNNCTTTCTGTAATTTCTGTAACATAGTTACTTTCTTGNTATTACTATTATGAAGGGGTGGAGATATGGTAGCTTTGTTTAGTTT
Gma.11061.1.S1_s_at	BI971541	At1g07960	9e-42	Unclassified - Hypothetical Protein NOT Supported by cDNA			GATTGCGGCATGGACAAAGCAGTATGTTCCAAAGTTGATATTCACTCCTATCCTACCTTTAAGGTTTTCTATGATGGNGANGAAGTAGCCAGATACCAAGGTACAAGAGATGTTGAATCAATGAAAACCTTTGTTTTGGAAGAAGCTGAAAANGNNNNNNNNAAAAGCACTTGAAAGTNACAAAGAATTATAACAACTTTTGAGGNNCAGTCATTATCTGGATTNCAACTAGCTCTTTACTGNNGGTGGTGCNCATCCCAGATNAGTAANCACCTTTGGGTTCAGGCTGAGACATTCATTCTTCTCTGTTCTGATCANCATTTGTTTGTTNGACGTAGCAGTTGTGAGTTAAGAAC
Gma.11245.1.S1_at	AW164759	At2g42130	3e-93	Unclassified - Hypothetical Protein NOT Supported by cDNA			GTGACACCAACAATTATTGAAGAGAGAGTACCAGAACANCTTAAAGGNGCACTNGGGCAGGCAGCTAATGCTTTACAACAACTTCCTNCCCCTATACGNGATCCTGTTGCNAGTGGGCTGAAAGTTCCTCTAAGTGGNAGCTTTCANAGACTCTTCATGATTTCTTATCTCGATGAGGAGATACTTATAATAAGGAACACNGCCGGGATTCCNGAAGTTTTAACGAGGTTGGATGCAGCACCNTCTNNCTTGGGAGATTCAAGTCCAGAGTATGANAGCTAGGAAATGGGAAGTGAANTTTTGNCCCANCTTAATCATGNTGATGANTCAAATTNNTGTTCCTCTCAGCNGNNNTGGACAGCTTCTGTTTCTTTCTCACTGAANACTCCTTTTGGTTTT…
Gma.11221.1.S1_at	AW396549	At5g12470	1e-111	Unclassified - Hypothetical Protein NOT Supported by cDNA			TTGAACCTTTGCTGCACCAGCACAAACTTATGCTAAGCGCAATTTGCTTTGCTGTTAGAACTGGAAACACTTTCTTGGGCTCACTATTGTGGGTGGATTATGCTCGCTGGGTTGGAGTCCAGAAGATACGGGATTAGGCATAANNGTTCTTCAGTTACNAGATATTNTCATAGGATGATTTGGGTCAAATCTTGTCTGTTGATTCATTATTGAAGTACAGTTGGTTTGTTGTANTTTTTTTTATTCCTCCTGAAAGCAATNTTGTAAATTGAGCAATAACGGAGGNCAGCAAGCACCNTGACTNGAGTCTCCAATTATCACCNTTTATGNTGGCCAGTGAAGGTATAAGATCCATCTCTCGTAGCTAGCAGAAAGCTGCAGCATGNGATGAATTTGAGT…
Gma.11224.1.S1_s_at	CD393301	At3g07560	9e-42	Unclassified - Hypothetical Protein NOT Supported by cDNA			CGCCAATCAATGATACGGTATGTTATTCTGCTAAAAGAGTTCGTCCAAATACATTGAAAAGAAGAAACAGCTGCATTCATTATGAAGATACTGAAACTGCAGAAGTCATGTATATCCTGGGATTAAAATTGAGTTTGCTATTTTCTCTTTGCTTGCGTTGGCTCTTGATTTTACTAGAAAGGGGATCTTAAATAAGATACCATCCCTGCATTATACCTTGTAAGCGTTTTGTTTGAATCCTTACATGTATTATCTTATCCCTAGCGTAATATTGCATACCTGC
Gma.12483.1.A1_at	CD393502	At3g51230	0.0009	Unclassified - Hypothetical Protein NOT Supported by cDNA			TGTGCTGAGTCTGATGTGATGCGTTTGAAGGGGTTGCCTACACCCAAAGGAAAGCACCTTCGTTTTCCTGAGGAGGAAGAAAATTCTGACTTGTGATTTTGATGCTGTGAGTGTTGTTTGCTTTTGGTTGTCTTTCTTGACACCAATGTTTTGGGTTGGGCCATTGGTTAATGATTGCTGTGATTGATTGGAAGCTAATTGCTG
Gma.1266.1.S1_a_at	BU548161	At4g12650	1e-20	Unclassified - Hypothetical Protein NOT Supported by cDNA			CTTTACCTTGGTTATTCACTACTCATGGCCATTGCAATCATGTTGTCAACCGGCACCATTGGCTTCCTTATGTCATTCTACTTTGTGCACTACTTGTTCTCATCAGTAAAGATAGATTGAGGTTCTTGTTGTCATTGCATATTAACTATGAAAAAGGTTGATTGATATAACTTGATCACATTGCATAGTAGGGCAACGGATGTTTAATTCATTGTCTGATTTTATATTGCGATGGGATCTGCAGTTTGTTCTCCTTCTGCCTGTTTCCCAAAGTAGTGTACTCATTCAAGTATT
Gma.13097.1.A1_at	CD409521	At5g35810	5e-52	Unclassified - Hypothetical Protein NOT Supported by cDNA			GTTGTTTCAACCCTAATTGCCACAGGAGTGTTTTCTGCCGCCTTCAGCGTCCCAGGTGGTACCAAAGACGATTCAGGATCTCCCAATTATTTGAAGAAACATTTGTNCACGNNATTTGCAATATCAGATGCCNTGGCATTAACTNTTTCTACCGCCTCAACCCTAATTTTCTTGTCCATACTCATCTCACGATATGCTGAGGAAGATTTTCTTAGGTCATTGCCATTCAAGTTGATATTTGGACTAGTGTCACTATTTCTCTCAATAGTCAGCATGATGGGAGCATTCAGTAGTGCTTTCTTCATAACATATTACCATGCTAAAACGTGGGTTGTTCCTATCACCATTGCTGTATTTGTGTTGTTCCCAATATTGTTATTTATATATCTACAGTTTCGT…
Gma.13104.1.S1_at	CD396157	At4g13270	2e-39	Unclassified - Hypothetical Protein NOT Supported by cDNA			TTTGAGGTTATCTACGACGCGTTCTACCTGCTCGAAGATATCGCTAAGGGCGTCATTCCATTCGATACTGACACNCGAGTTGAAGGGAAATTAGGGCTTTTCTTCTTCACTGTTCCTTTGAAGGCAACAGTGTCGTGCGAAGTGTATGTGAATATAAACCAGCAGACAATTGTACGTCAAGACTGCTATCCTAAGTCACTGGGTGATCCGCTGGATCAGAGCGCATATATTGAAGCTGGAGATACATGATGTGGTATCAACCTTTTGCATCCTTCTCCTATACAGCGCTGCTGCTGGTGTTTTCATTACATTACTTTTAGCGTGCTGTATAATTGTATATGGATCACACATCCTTGTAAATTATGGTTGACTACAGACCACTTGCATTTTGTATTTAAC…
Gma.11413.1.A1_s_at	CD393256	At1g12400	4e-26	Unclassified - Hypothetical Protein NOT Supported by cDNA			GTCTTTATTTCCTGTGACATACCTATGGCACAATATATCATCAACATGAATGCTTCATTGCCTGCATCTGACAAGTTCATTATACATATCTTGGATAATACCCATATGTTTGTTCAACCTCATGTTGAGCAAATGATACGAAGTCAAATTGCCAAGTTTAGAGAGGACAATACATATGTCAAGCCTAATTGATT
Gma.11249.1.S1_at	AW348404	At3g50590	1e-157	Unclassified - Hypothetical Protein NOT Supported by cDNA			TCCTTGCTATATATAACCTTTGTTACCCTAATGTTGTAAAGAGAGAGACAACTTTGTAGAGAAAGTAAACAAGCCATTATAGGGTAACAAATATTGCACCACAACTGGAGAGATTATAGGGTTTCACTTACTGCTTGAATTTTGATGATTGTGATGGTTGTTTCTCGGCTCTCATTTTTTTTCCCTCCCCGATGATGCATTGTCTGTGATTACAGAATGTGTTGCTCTCCTG
Gma.11900.1.A1_s_at	CD410294	At4g15840	4e-28	Unclassified - Hypothetical Protein NOT Supported by cDNA			AAACAAACAGGCACTCTTCTACCTAAAGCTCCTAAGGGATGGGGATGGCGAACTGCCCTGTTATTTGATGAGCTTGCTGATCTTCTTCAAAACGGTGCCCTAAGGGTCATTGCTGTAGTGCAGCTTG
Gma.12333.1.S1_at	CD391778	At1g72170	4e-27	Unclassified - Hypothetical Protein NOT Supported by cDNA			GGTCTCTGAAACTGCTACTCAGAATGTGCCGGATTCTGAGTAGAAGCTACAACGGATCCTGGTTCCTGGTTCCTGGACAGTGGTGAATCAGAATTTTCTTTTGATTGTTGATGGTTCCATACAGCATTATTGCTCTTCAAAATGTTGCACTACCATAATTTCGTAAATGAACATGACGTATATTTTATTCCCAAGCTTTTACGCTTTTGATCTCCTGTGATCTTACGCAATGTTTATGTTGAGAAGGATTGGAAAAGCCAAGGAACCTTTCTTCANNNNNNANNNNGTATTCGCTCTACTTTGAATCCGATTTAAGTATATTCTAAAATCGGATTGGTGAGTTAACTGAC
Gma.12381.1.S1_x_at	BU547775	At1g69840	1e-102	Unclassified - Hypothetical Protein NOT Supported by cDNA			AAGCGGAGGGAGAAGCAGAATCCAAATATCTGTCAGGACTCGGTATCGCTCGNCAACGTCAGGCCATTGTGGATGGACTGAGGGACAGNGTGCTTGCTTTCTCTGAGAACGTGCCNGGGACANCAGCTAAAGATGTCATGGACATGGTGCTGGTGACTCAATACT
Gma.12424.1.S1_s_at	AW706222	At3g27010	4e-13	Unclassified - Hypothetical Protein NOT Supported by cDNA			CATCAGCAAACTCCTGCTAAGGATGATTCTCAAGGCTCAGGAGGACAGTAGTAGAGTGTTTAATTATGGATTTGGATGAAAGAAAGAAAAAGAAAAAGAAAGTAGCATCATTGTCTAGATGCTGGCTGAGGTTTCTAGTTTCTACAATGGCTTTTGTATTGTATAATTGGGAGACTGTGAGGGAAAAAAAAAATAGGTGTCTCAGAGAATTCAATAGAAAGCTGGATTTGGTTTACCCCTTTGGTTTACCCCCCCCATATTGTTTCTTCTCCCCAGTACTCAAGTCTCCATATACAGGTGGAATTGC
Gma.12227.1.S1_at	BG511671	At5g43150	6e-16	Unclassified - Hypothetical Protein NOT Supported by cDNA			GTGTGCTCCATGCATGTGCCGCACATGATCATGATTGCTGTGTACGTGAGAAGAAAAAAATCCAACCTATGTGTTGGTGTGGTTTTTCCTGCTTCAATCATGAATAAAAAAAGGGTTCTGAAGGGTTTGTGTAGAACACGGTTCTTCTTTCCTTTTGAATCAACCAACTCAACCATATGTAAATATCAACTGCATCCACCAAGTTCGATGTGTGTGACCATCTCATACTCCATCCATGTGCTTAATTAGTGTGGTATCGAAATTGTTGTATGTGTAGTTTCTGCTGTGTTTCATCATCATCATCATCTTGGTATGTGTTCAACCAGACGTTCATGTATTGCTTTTAGAGATCCATGAATCGTGTCTATCTCAGGCTTAATTCCAGCTTGGTTTTTGTAT…
Gma.3719.1.A1_at	AW350381	At4g01870	2e-43	Unclassified - Hypothetical Protein NOT Supported by cDNA			TGCCGAACCAGTTTCAGCCGTATGGGGATTTGTATGTGGTGAGGTTGGATGGGAGTGGGTTGAGGAGGCTGACGTGTAATGCGTATGAGAATGGGACGCCCACGTGGCACCATGGGGATTTGGCGCTGTGTGCTCCTAGAGAAGATGATGGCGAAGGAGGTCAGGATTGGGATAAGTTGAAGGGTGAGTTTCAAGAACCACTTTGGATCACGTGTGATATTTGAATTCATCACCAGTGTTCCACTGGTATGTAAATTA
Gma.3254.2.S1_at	CD391904	At5g15900	1e-141	Unclassified - Hypothetical Protein NOT Supported by cDNA			TAGGACTGCATTTAGAGCCATCAATAGATTAGAGAACTTCAAAGGGACAGTGTTTCTTAGGACATTTGCTCCATCTCATTTTGAGAATGGGTTGTGGAATGAGGGTGGGAATTGCATTAGAACTAAGCCATTTAAGAGTATTGAGATATAATTAGAGGGCCTTAATTTGGAGTTTTATATGATTNAATTGGAGGAGTTCNAAATTGCGGAGAAAGAAGCCAGAAAGAAGGGTTTGAAATATAGGCTATTTGATATCACACNAGCATCATTGTTGAGACCAGATGGTCACCCAAGTAGATATGGGCNTTGGCCTAATGAAAATGTGACACTGTACNATGATTGTGTGCATTGGTGCTTACCTGGGCCTATAGACACATGGAGCGATTTCTTACTAGGAAT…
Gma.3381.1.S1_at	BE658438	At5g05140	1e-09	Unclassified - Hypothetical Protein NOT Supported by cDNA			GATATCACAGTAGGCATTGGGCTAATGGNCGANGATAAAGCTATTATTCTATGGTGGACCTTCAGATTTAACAGTATTTCCAAGCTGTTTGTTCCAAATGGGTTGAAGATTGGTCCCCTTGATTGTAGAAAATAACAAAATCCATTCACCATTTGGACTTGCATAGAATTATTCCAATTGAGAGGGAAGTAAACCTTTAAACACTGTTTATTTTCCCAGTTTATAGGAGTTAAAGTAAATAGGAATTTTGTTTCATTCTAGATCGGATTTTTAGAAGAGGATCCTAACTTGGGGCACCTCTACTTTTGACTTGCTTCCATAATGATTGTCTATAGAAATCTCAATTGTTTCTAGACATTTTTCTTGTCACATGACTTACTAGGGTCTCATATATAAGTT…
Gma.3095.1.S1_a_at	CD399346	At2g14910	1e-102	Unclassified - Hypothetical Protein NOT Supported by cDNA			TATCTTGCTCGCCTGCTCTTTTGGTGCATGCTGTTGGGACACTATCTTAGAGGGCTTGAGTGTCGATTGGAGTTGACGGATTTGCTTTCCTTGACAAGTGATGCCGAGAATGATGNTTCTGGCAGTCAACCAATTGCTTGAAGTTCAAATTGGGTGGTTCAATCTGTATATAGACGTGTTGTTTCAACATGATTTTTGCGATACAGACTCAAGTACCAATCACTTCTGCTGAGGAGCTATCTTTGCTTACTGAAGAATATTGCATTCCTGCCATGTACCAATTCTCGGTCT
Gma.2751.1.S1_at	BU083070	At3g48660	2e-20	Unclassified - Hypothetical Protein NOT Supported by cDNA			TTTTTTATTCTAAGATCGATCATCTTCAATTTCCCTATATTACTTGCAATATTGATTGAACACTACTAGATCATGTGTATAACGTTGTATAGC
Gma.2508.2.S1_a_at	CA938558	At1g48300	0.001	Unclassified - Hypothetical Protein NOT Supported by cDNA			CTCAGGGACTTGATGATTCTGTTAAGATTCCTGCTAACCCTCTATGCATTGGGGTTGGCTTGGAGGATGTGGATGCCATCGTGGCTAGATATTTTTGGGAGAGTCACACAGATATAGGCATGGCAGGTGCAGGTGCAGCTACAGCTACTTGATGTTGTGGGAATGGCTAGTGTGTTATTTGTAATTATATATATACGTAGCCAGGATGCCGAGGAAACATTATTGACAATGGTTTTTTTTAGTTGTTCATATTGNATAATATAAATTAGTTATGAAGTTTCTTTTCCTTGTTTATTGGGAATGCCATTCCATTGTTTCACTCTTATACAAT
Gma.2373.1.S1_at	CD412331	At5g63690	6e-48	Unclassified - Hypothetical Protein NOT Supported by cDNA			ATTTTCGTACCAGCATGGGAACCTTATACTGAGGGCAGGGAAGAGAGGGAAACTAGTGAAGGTAGGAGGGTTCACTATGGCCTTTGTTGAGACACCAAACATGAGTGAGATTCATTGGATTCCTGACCCAAACAATTCTAAGAATTATATCCAACAATATGTAATATCTCCTGTGTCACGCATCTTTCCTCCTCCTTCTGATATATAAAAGGGATGTGCACTTTTATCAGATCTGCAATATTTTGTGATAA
Gma.2293.1.S1_at	CD398886	At3g22845	2e-91	Unclassified - Hypothetical Protein NOT Supported by cDNA			AAGATTGCTGAGCTCAGAGAGGCACNAGAATCTGTTACAGCTGAACANAAGTACTTGAAAGCNCGTGATGCNAGNCATCGNCATACNAATGAGAGCACANGGAAGCGTGTTGTATTCTACACTGTGGGAGAGTACCTTCTCTTGGCTGCTGTTAGTGCACTGCAAGTCATATACATNAGGCGCCTNTTCAGCAAGTCAGTGGCCTACAATCGTGTTTGAGTCNNCCTTCATGATTAACGTTANTGGNTTCCTTCATTAGCAACAGGNTTAGGTTTANNNCATATGCGTTCTCTATTCANNNNACAGTACGATTACNATCCCTTGGTGAACACTTTTTTTNNNNCTTTTCAANAGAGACTCCACTTGTATGTTGATACCCAACAAGATATTTAAATTCCT…
Gma.2409.1.S1_at	BM178135	At2g22880	9e-08	Unclassified - Hypothetical Protein NOT Supported by cDNA			GGGTGCACCGGAGTTCAAGCCTGATCAGGAACATCATCAACTTTTCCAAAGTGTCGCAGTCGCACCTATTGCTGCTACCTCCCTTGTAAATACGCCCCCGAAGCAAATGTTGTCGAGCAAAGACAATATTGCAGCATCATCAACAATGCCCTCCACTAACTGGCACCAGGGGGCACAATCTGAAGCATTGGAATTGAATTTATCATCACCCTCTTATAATAACTGGTTTTCTGTCTCTCGTATGAGCCAAGGAAACATGACCAGCTTGGAAACGGGTCGAGTTCTCTAGTTATATATAATATTTTTTTAAAAATTTATCTCCCTTACTTATATANNTTTAATTTATTTCGTTCGGTGTATATAGCTTCTGTGCACAGTTTGTTTCGTTTGGACTTCGGA…
Gma.2172.2.S1_a_at	BI426425	At1g55360	1e-142	Unclassified - Hypothetical Protein NOT Supported by cDNA			CTTCTTTCCTGTTCTCATATTTGGCTGACAGTGCTTCCATGATTGAGTGGGGAGGTGAAGTTGTTAACTCTGAGCCTGATGGTCAGCACACATCAACTCAAATGGGAAGTGGTCATTTCCCTGAAGAGGGTTTTGGCAAAGCAAGCTACTTCAGGAACATTCAAGTGGTTGATAGCTCCAATAATCTCA
Gma.1989.1.S1_at	BU965052	At4g10790	1e-100	Unclassified - Hypothetical Protein NOT Supported by cDNA			GAAAGCTCTGTCTCTTGGTGAAGAACCTGCAAAAGGACCTAATGTTACACAGGTTTTGGTACGGTTTCCAAATGGTGAACGCAAGGAAAGGAGGTTCAACAGCATAGTGACAATTCAATCTTTATATGACTATGTTGACTCACTTGGATGTTTAGAAGCCGAGAGTTACAGTCTGGTCTCCAATTTTCCTAGGACTGTTTATGGACAAGAGAAGTTGACATTGTCATTGAAGGAAGCTGGATTGCATCCTCAGGCCAGCCTGTTTGTGGAGCTCAGTTCATGAGAGTAAAACTTTGCTTAATATTCTTATGAATACAACATGAGGCCTGAAAATAGGGATTTCTGCGATGTTTCATTCTTCTGTTTAAAAGAATTGACTTGCTGAACAATTATAAACGT…
Gma.1931.1.S1_at	BG155300	At1g79160	1e-49	Unclassified - Hypothetical Protein NOT Supported by cDNA			AGTGTGTGCACCCTTGACAAGGTCAAGTCAGCACTNGANAGGGCAGAGAAAGAGCCTATTGTNAGGAAAAGAACCTCATTCTTGAAGTCACCTCTCTCGGNNTCNTCGCCNTCGTATTCCTCCTCGTCGTCNTCGATTAGGGAAACNNNAATTCAAGAAGANGAATGTGAAGAGAGNCTNAATGTTTCATCATCNCCTNTGGCTGCAGGGTGCCCTGGTTGCTTATCATATGTAATGATCATGAAGAACAACCCNAAGTGTCCTAGGTGTAACTCTCTTGTTCCTATTCCTTCCATGAAGAAACCTAGNATTGACCTCAANATATCAATTTAAGTNNGGTAATTGATGAAAATTGNCTCCATTTTCAATATAATTTGTTATTNNNTNTTTATATCAACG…
Gma.2050.1.S1_at	AW309484	At1g50670	9e-92	Unclassified - Hypothetical Protein NOT Supported by cDNA			ACAGAAGCATTGGACCTGTTGAGGGGCTTGCTCTAANTTTTGTGAAGGACCAGCANAGGAAACGGAGTTACACTGACACNTCNAACTTCACTCTNCGCTGTGGNGTATGCCAAATTGGAGTAATNGGTNAGAAGGAGGCAGTGGAGCATGCACAAGCAACTGGTCATGTTAACTTCCAAGAGTANAGATNATGCACTCNGTTNNTTTGAATGNGATACAAATTCATGTGTAATCTCCGTTGATTTGAATGAGCATCATNGATNNAAGGTAGTTGCTTTGTTGCAGACNANAAAANCTGAATAATTTCTGCATGAGAATTGTTGTGGCAACTTGNGTTGTAATANTAGTTCCTTGGTCTNGTTCCACAANTGACTGTGATTATAAGAAACTCACCTCTAG…
Gma.18016.1.S1_at	BG155222	At2g26890	6e-77	Unclassified - Hypothetical Protein NOT Supported by cDNA			GAAGGAATGGCTTTTGTTCTCAGATGAAGTGGAATGAATCTGAAGCGTCTATTGGCAGGGTGCTTGCAATTGAGGTCTTGCATGCCTTTGCTACTGAAGGAGCCCATTGCACTAAAGTGCGAGAGCTATTGAATAATTCTGATGTTTGGAGTGCTTACAAAGACCAGAGGCATGATCTCTTCCTCCCTTCAAATGCTCAATCTGCAGCTGCTGGCATTGCTGGTCTCATTGAGAATTCATCATCGTCGAGACTCACTTATGCTCTTACTGCTCCACCACAATCTACTGCTTCTAGAACTCCTCCACCATCCTCTCCGGACTTCAATGGAAAGCAGGATCAACCTTTACAGTAAAAAAATAATAATAATGGAGATATACCCAAGCCTATACTTGTAACTC…
Gma.17913.1.S1_at	AW310479	At2g20650	1e-103	Unclassified - Hypothetical Protein NOT Supported by cDNA			GGTGTGTTTGTTTGGCTATATTTGTTGGACTTCAAGCTGCAATTCTCTTGCTTCAGCACTATTTTGGGTCCTTGTGGTTCATTCCTCGTCAGTTTCTACCTGAGAAATACTGCTATTATNGGAGGTTTGCTCAAGATACAAANCATGCCACAGACTGNGTTATATGCATGACNGCCATTGATNTTTCTCCGCGATCTAANGATTGCATGGTGACCCCTTGTGANCATTTTTTCCACTCTGGCTGTTTGCAAAGATGGATGGATATAAAGATGGAGTGCCCTACTTGCCGNNGCCCTCTTCCACCTGCATNAAGAGATTTCNAGTGTTCATATCAANAGNATNAACTNACACTGCCCAACTACATAATTTTGGTTGGGATTGAATCCATATTCCGTATAA…
Gma.4350.1.S1_at	BU544832	At3g21570	3e-13	Unclassified - Hypothetical Protein NOT Supported by cDNA			AACGAGTCGGGTTGCTGTCCCGGATTTGGATCGGGTCGGACCCCGACAAATGATCCATATTACAGTCTCTCTTTCTCACCTTATTATTATCCAGAATATTCTCTTTCTCGTCTTCTCTCCGTAACCGTTAACTTTAAGCCCGTCCCGGTTTGAAGTTCTGACCCGATTGTGATTTTTTTAAACGAAAGGGTGGATGATCTGAACTAGGGGGTGAAATGTTTAAAGGTTTGGAGTAGCGTTTGAAGCCGTGAGGCTTTGATGATGTAAC
Gma.4353.1.S1_at	BE822940	At4g14450	3e-06	Unclassified - Hypothetical Protein NOT Supported by cDNA			GTTGGCATCATCTCCGACGCCGATCGAGCTAAAACCGCCGCAAGAGCCGCCGCAGAGGGAGCCGGAGAAGGTCACCTTGTCGTTCAAGAAGTGGCAGCATCCTGCGGCTCCCTTCTGTTACGAGCCCGCTCCAATGGTGCCGCCCTTTGTTCCTGTGTAGATGAACGAACGAGAGAGTTTTAGGATGCTATCTAATGGTTCATATTTAGAGAGAATGAAGAAGAAGATATAACGCTGTATTTTTAATTAATTAATTAATATTGTTCCTTTCTTCTTTTTGTTGGGGAGAGGCTTTGCCTTATTTTGCACACGGGGGTATTTATCAATACCTGTGATTGTGAATATACACCCCCTCTGTG
Gma.4917.1.S1_at	BI969807	At1g04940	2e-75	Unclassified - Hypothetical Protein NOT Supported by cDNA			AAAAGAGTGGCCTCATTTCTTCAGATTTCATGTTGTGATGGGAATGTTATTGGAGATTGCCCTGCAGGTTATAGGGACTGTGAGCCGNTGGATGCCNCTATCACTCTACTGGGGTAAACTGGGAATGCATTTNTGGACTGCCGTATCATTTGGTTATCTNTTTACNGTCTTGGAGNNCATAAGGTGNGCTCTTGNNGGTATGTATGCTGACATTCCTTTCATCTGTGANNGCAGCATATATCCANATNCCATATGATTAACANGGNAGANGTAAGGAAGTTTANNNTTACATTATGTATCACTTTTCGTTGTATNAGANTTTTTCTTGAGCAGNATTGAAGAANNANTAGTCTGTTAGTGATTGTTTATGTGAAAAAAATATGTATTTGAGATTTCCCT…
Gma.4995.1.S1_at	BI970336	At3g12140	8e-08	Unclassified - Hypothetical Protein NOT Supported by cDNA			ATTGAAGGATCATGAGCAGGCTCTTATTGATGCAATTGCAAAACTTAATGATNNNNNNNANNGNNNNANNGATGGGGCTGGNNNNNNCCACCATTTCTCACATGCTCAATCAATGGATCGAGAGTGATGAGNACCTGTTANTTTGTACAATGAGCAGAGGAGGCATTANGATAGCATAATTCTGGAAANGGGTGTATTTCTNTTGTATTATCACATAAAGATTATTACCCTCTNNAACAGTTTATAGCTGTAGGCATGGTTCTTGTGGATTAGGCATTATGTAGGATGGCAAATATTGTAGTTTGGTAATAATTATTTATTTCNGTTTGAAAGNTGACNNAGGACCAGCTNATGATACTTGTATAATTCTGTTTCATT
Gma.5103.1.S1_a_at	BI968925	At1g80500	5e-35	Unclassified - Hypothetical Protein NOT Supported by cDNA			CTTCCAAGAGGTGCATGAGCTTTACATAAAGACTCTCCTTAATCCCCTGTACTTGCCTGGCTCCCGGATCACGTCATCACATTTTGATACTAAAGTCCGAGCCCTTGCACGAAAGTATCTGTAGTATGTAGAAACCACTAATTGTCTATGGTTGCTAGTTCATATAGCTCTGTGGCCCGACTCTCGTTCGTTCTTGATTACAGTTGAAAAGTTGGCTTTCTTTTTCTTTTTCTCCTTCATGATTTGGCGGCATGGTTAGGTTTGCTGTTGTCTATATTGTACCTCAGTCATTAGCAGGTGGT
Gma.5247.1.S1_at	BM270488	At3g04490	6e-05	Unclassified - Hypothetical Protein NOT Supported by cDNA			ACAGAGCTAATCTTTTGGCAGACAAGTATTTGGGGCTACAGAAAACAGAGTCCTATCTTCACTGGGCTTCTGTAAGTCATATCACTTTGGTTGTATGCCAAAGTAAAAGCTTTTTGGTTTGTCAGAGGCTATTGCAAAAGCAGAAAAGCTGTCTGAAGATCTTAGAGTAGCAATTCAGTGACAAAATGGTTGTTGAGGCAACATTCTTTTCTGTCAAGTTGCATCCTTGCGTAGATATNCATTACTATCACTTAGTTTGGTAGGAGCCTCTATATTTACACTCTTTCATGTTTGTGCTCTACTGCACAAGCACGGAATTCGTTTAGNTCTGTTAGAGATGATGTTAAAGTGTTAAACCATTCCAAAGTTTATGCAAACTTAAGCTTTGAGGGAAGTTGA…
Gma.5250.2.A1_at	AW705690	At1g15370	8e-33	Unclassified - Hypothetical Protein NOT Supported by cDNA			AAGATTGGTCAGGTTAAAGCCTCCAACTGAGTTCTAAATGAGAAGTTCAAAAGTACTCATTATACAACTTGCAGTCTGTGTTAGTTGTTCAGCATCTTGCAACTGGGAGTGGCAAGGCACTTAAGTTTATTTCCAACAATTGTCGGTCAGGCAAACCTCTACATATGAGCTTTCTTCCTTAGTGTAGCGAGGCAAGGATTTTGCTGGGCCAACATTTGTATTACCCTTCTTAATTTTTAACATTTTTTTTCTGNCATCAAATTTTTATTTTATTCTATCTTGTGCATTGTGCTTTTGTTGGATTTGGATGAATCCTTTTTTTTGTTCCTACGATGATACTCCCT
GmaAffx.9286.1.S1_s_at	BI969788	At3g46640	3e-59	Unclassified - Hypothetical Protein NOT Supported by cDNA			TATTGGTAGTATAGCTTTCTGAGAAGGGAGGAGCTGCATTGATGATTACCCTGTAATTCACTCAAAAGGATTATTGAGGAAGTATATGAAGAAGAGTATATGGAGCTAGATTACAATCTTAGTCAGTAGTGTGTATCCTGTGGGAGATNNNCAAACTTATTGGTACACATCTCTAATTCCTGTCACCTAATTGTATGNCGAGAATTCTGGCTTATTTCTTCTGGTCTGCCTAGACAGCTGATTCTAA
GmaAffx.91857.1.S1_at	CF807581	At2g26110	3e-13	Unclassified - Hypothetical Protein NOT Supported by cDNA			CAATCTCGTCATTGGAACCATCGCCATCTCCT
GmaAffx.90087.1.S1_at	CF805812	At1g01170	2e-11	Unclassified - Hypothetical Protein NOT Supported by cDNA			ATTGTGAGTTAATTGATGCACCTTGTTCATGGGATATGTTTCCATAAATGATGATAATGTTTGAGGTAAAAGTCTTGCAGTTCAATTAGTGTTTTGATTTTTAATCATGTGAATGCTTACTTGCTAA
GmaAffx.86309.1.S1_at	BE347941	At4g24690	9e-92	Unclassified - Hypothetical Protein NOT Supported by cDNA			CAACGTGTTTGGGTCCTTATACAGGTTGATGCNTCTCTCNAGGACTCATTTTATGATANCTCTCAAGGTCTGAACTTGAATATTCCCCTNGATATCAGTGGCTCTAAAGGACCTCANATTATAGATATCAATGTCCAGCCTACTGAGGANGATACTGTTCTTCAAACCCGCAANCCTAATGCTCCCATTGANCCTNTGAATCAAATGGTTGATNANGAACCAAGGTTNGAGCTGGAAAANGAATTCCCTATAAATGAAGCTACATTTGTTGNCCCTGNTGCCTCAGCCCCNGCTGCAACCNCTGTGGCATCTTCATCAGTNNCTTNTCCTATNATTGATNTNTCTGAAACAACCCCAGCTGTTCCATCTAATCAGCAATCCTCAACTGTGGATGTGCCT…
GmaAffx.85575.1.S1_at	BU545986	At5g25770	1e-115	Unclassified - Hypothetical Protein NOT Supported by cDNA			AGAAGGTGTGGGACCGAATTGCTCCNGGTTTAGCTTCCCAATTTGANTCACCTTATTCAGTTCCAACTATCGCACCACGTCCTTTGCTTATTGTTAATGGTGCGGAAGATCCTCGGTGTCCCGTTGCAGGCTTGGAAATTCCAAGGGCACAAGCAAGCCAGGCATATGGACAGTTTGACTGTTTAGATAATTTCAAGATTATTACAGAACCTGGAGTTGGACACCAATTAACGAGACTTCAAGTGAAAGAATCATCTTATTGGTTTGACAGGT
GmaAffx.84414.1.S1_at	AI960975	At2g01910	2e-48	Unclassified - Hypothetical Protein NOT Supported by cDNA			GAAAAGTCTGATCGCCTTCAAAAGGTCTTGCAATGTGTGAATGAGGTGCATTCTCTTTGTAGTGTGCTTGGGTTGGATTTTGGCCAGACTGTGGGTGATGTACATCCAAGTTTGCATGGGACTCAGGTGGAACAATCAACTAATATTAGCAATAGCACATTGGAAGGTCTAGAGCAGGCCATTCTCAAGTTAAAAATAGAAAGGAAAACCTAGATTTCAGAAGCTGAAGGATGTTGTATCTAAACTATTTGAACTTTGGAATTTGATGGACTCATCAAAAGAAGAGAGAAACTGTTTTATGAAGATTACTTCTATTGTTGGAACCTCAGAATCAGAAATCACTGAACGAGGTGTTCTTTCAACAGAAA
GmaAffx.85539.1.S1_at	AW348505	At3g12950	2e-09	Unclassified - Hypothetical Protein NOT Supported by cDNA			AGGAGTTGTACCTAGTAGCCAAGACATGAAACCATCAATNATGGAGACTGAATTTAAATTAGAAGATGGAATCAANGTTGGTCCCAGTATCGAACACCAGTTNATNCCGAGCTTCATTGGGCGGTCTCCNTTGCANAAAAACAGCATACAGGACAGAACTGCAACAGAGAACTTGTCTTCATTGAGGAATAACTGTGATGAAGATTTGTGTGTTTCACTGCAGCTGGGTGACAATGAAGCAAAGAGAAGGCGTTCTGAAGCCTCNACTAGTACNGAGGAACCTCAGTGAAANNGATTATTTGCATAAGCTGGAAAAANTGACTTATAAGTCTAATCACCTCAGAATGTGTTGTTTATGGCCACTGTGGTACTGTGTTTATGCTTAGCANCTCTGACANT…
GmaAffx.85212.1.S1_at	BE022812	At5g39250	8e-06	Unclassified - Hypothetical Protein NOT Supported by cDNA			GATCCAAATGGATTTCTGTGATGTAGCAAATTCTAAGGAAGAAGTCTTGTGGCTGTTGGACATGCTTGACTGGAAGTAAATGTTCAAGAAAAGTGTGGTGCCCCATCATTACAACAAAAATTAATTGGACATTGTGATTTTATGTTAACTTGTTTGTTGATACGGGGTGCATTACAAAGTTT
GmaAffx.83657.1.S1_at	BI316738	At4g21570	1e-66	Unclassified - Hypothetical Protein Supported by cDNA			CATGGCAGTTTGTTGTTGTCCGTCCAGTATGTTCTGTTCTGATGATTGCATTACAGCTAGTCGGGCTGTATCCAACTTGGTTGAGCTGGGCATTCACCATCGTTCTCAACATATCTGTGTCGTTAGCCTTGTATTCTCTGGTGGTCTTTTACCATGTGTTTGCTAAAGAACTGGCACCACACAAACCTCTAGCTAAATTCTTGTGCATCAAAGGAATTGTTTTCTTCTGCTTTTGGCAGGGAATGTTGCTGGAGCTTTTAGCGGCAACTGGTGTCATTCAATCTCGCCATTTGCGGTTAGATGTGGAGCACATTGAGGAAGCAATGCAGAATATTTTGGTATGTCTAGAGATGGTTATCTTTTCTGTTCTTCAACAGTATGCTTATCATCCTGCACCAT…
GmaAffx.83714.1.S1_at	BU550983	At1g07840	2e-24	Unclassified - Hypothetical Protein Supported by cDNA			AGATGGACGAACGTGCTCGGCAAGAGGAGGAGCTGTTCACACGCGTTCCTCTTACGAAACAGGAAAGGAAACGAGAAAAGTATTTGAAGAAATCAAGAAATGGGTTGCAAGGTCTAACAGAAAGTTTCTATGATGAAATCAAAACATTACCCTTTGAAGATAAAACTGGAGAGCAAGTAGTGGGCTCTAGTAATGGTAGCAGAACAAACAATAGACTGAAGAAGCGAAAGAGGAAACATTAAAGGAAGAAAATTTGGGTTTTGAGCTAAAGGGCTGAAATGCTCTCTGGAAAACAGACCACTTCATGCTGTTGTCGGAAGTAATGCTAGATTTAACGAAAACGACAGAGTTGGTGTTGGTGCTTTCCTCCGTGTTTGTTTGTAGATTTTAGTTACATTA…
GmaAffx.86632.1.S1_at	BI320306	At5g53045	4e-25	Unclassified - Hypothetical Protein Supported by cDNA			ATTCTCGTGTTTAAGTCTGCCTACGTTCCGCTTCCTTTGCCATCAGAGCAAGTCCACGCTTTGAACCCGGTCGGGTCACACATGGCTACACCACCACAATGGGAATTTAGCTGTGACATGGAAATGTATTTTGGATCGGAGGAGAATGCTTCCATTGTGTATGCTGCCTTAGCNNTNGNNNNNGANNNANAGCCTGATAAAGTAAAACGACTTATGACAGTGTCTGATGGAAAGCTATCAGTGCACTTTGAGGCAACAGAAGCCAGATTTCTTCGGGCATCATTTAGTGCTTTTGTAGATGTCCTGACACTAGCCACCAAAACTATTGAAGAATTTGGTCAAGTAATGAAGTTGTGACGTCTCCTCATATATTGAATGTTAGATTGTTGAAGTGGACTA…
[truncated: 250 more rows]
