# Supplementary material for: Microarray Detection Call Methodology as a Means to Identify and Compare Transcripts Expressed within Syncytial Cells from Soybean (Glycine max) Roots Undergoing Resistant and Susceptible Reactions to the Soybean Cyst Nematode (Heterodera glycines)
Source: Hindawi journal article supplement (doi:10.1155/2010/491217), 2010-01-01
Supplement: f14 [file 491217.f14.xls]

## Sheet: Sheet1
Probe Set ID	Representative Public ID	At Gene ID	At BLAST E-value	Functional Category	Subfamily	Gene Family	Sequence
Gma.10796.1.S1_a_at	BE819933	At5g05170	9e-26	Cell Growth & Division			GACCCGTTTACGACAAGAGTCACTGGTCCTGATGTTGAGCAGTGTGGAATCAACTGCTAGAGAAATAAAAGCTGGCAGATTGAACAACAGCTTTCCACTCACCTGTGTCAACCAACAACATAAGCCTGATGGAATGTTGTGTTTGTCTTCCAATTCTTTTGTTTACAGATTTTGATATTTGCTTCTGCTTGTTTAAGTTATGTGCAGTTAATGGTTCATACAGAGGAAAACATGTTTAAGTATGTGCAGTTAATGGTCCATACAGAAGAAAACAGGNTTAAGTTATGTGCAGTTGATGGTCCATACAGAAGAAATCAAATTAGAATCAAATCATTTAAGGTTGCTTANTTTTTTGTAATACTATGAACATACCTTCCATTCTTTTGAAGAAGC
Gma.10796.2.S1_at	CA935397	At5g05170	0	Cell Growth & Division			ATAGAACAACAACTTGCCACTCACCTGTTTCAACCAACAACATAAGCCTCCTGGGAATGTTGTGATTGTCTTCCAATTCTTTTGTTTACAGATTTTGATATTTATTCTTGCTGATTTAAGTTATGTGCAGTTTATGGTCCANNNNNNGAAGAAGAAATCATGTTTAAGTTATGTGCAGTTAATGGTCCATACAGAAGAAATCAAATTAGAATCAAATTATTTAAGGTTGTTTATTTTTTTTGTAATACTATGAACATACCTTCCATTCTTTTGAAGAAGCTGTTTGTCTTATTTAAACTATTCATCAGAAGACCACATCCTTGTATACGTCTTTGTTATATTAACGAGTTTTTCTTCTG
Gma.10796.2.S1_x_at	CA935397	At5g05170	0	Cell Growth & Division			GACCCGTTTACGACAAGAGTCACTGGTCCTGATGTTGAGCAGTGTGGAATCAACTGCTAGAGAAATAAAAGCTGGCAGATAGAACAACAACTTGCCACTCACCTGTTTCAACCAACAACATAAGCCTCCTGGGAATGTTGTGATTGTCTTCCAATTCTTTTGTTTACAGATTTTGATATTTATTCTTGCTGATTTAAGTTATGTGCAGTTTATGGTCCANNNNNNGAAGAAGAAATCATGTTTAAGTTATGTGCAGTTAATGGTCCATACAGAAGAAATCAAATTAGAATCAAATTATTTAAGGTTGTTTATTTTTTTTGTAATACTATGAACATACCTTCCATTCTTTTGAAGAAGCTGTTTGTCTTATTTAAACTATTCATCAGAAGACCACATCCT…
Gma.10862.1.S1_a_at	BI969361	At4g32410	0	Cell Growth & Division			TGGGCAGGCAAAATCGTACCCCAACCATTGTTATTGTTTGGTCCGTTCTTCTTGCTTCAATATTCTCCTTGCTGTGGGTGAGGATTGATCCCTTCAC
Gma.10862.2.S1_x_at	AW310022	At5g05170	3e-15	Cell Growth & Division			TGGTCCGTTCTTCTTGCTTCAATATTCTCCTTGCTGTGGGTGAGGATTGATCCCTTCACCTCTGACTCCAACAAATTAACCAATGGTCAATGTGGCATCAACTGTTAGTTCTCTTGTATGATTCATTTTGTGTTGTTATTCCCTTTTGCTTGGAGATACACAAGGTTGCTGTCGTGTATATAGCAAGAATTTTCAGCCTATCAAAGTTGTCTGGAGGATTGAACCCCTGAAATAGATGGGAATGTACCCTCTCTGTTTCTATTAT
Gma.13544.1.S1_at	CD417852	At3g50070	6e-58	Cell Growth & Division	Cell Cycle		GTATGAGCAAATCCCAAGCAGCCCAAGTGGCGTNATTGATGCTGCATTTTGCTCTGATGGTTCCAACGATTCGTGGGCAGTGGGGTCATCATTNNNATATTCACCACCAGAGCCTCTCTTCAAGAAGAGCAGAACCCAAGGACAACAAATGAANTTGTCACCACTTAANCGGNTCATTNTCGGAATTGTTGGCACCTCTCCTTAATTAANTANNNCCCTTTCACAAACCAAAAAAGAAGTCTTATATTTTATTTACTGTGGTAATTAGTCTTCCATGCATGTTGCTGAACTTCAGAGCCTTCCCCTCTATATGTATCTCTTCATTTCCAACAATGTCCCTCATTCATTTAACATTTCTTGAAGAGGCAAGGTGGTGGTGGTTCAGGAATGAGTGGTCTA…
Gma.1422.1.S1_at	BE824233	At3g27280	1e-23	Cell Growth & Division			AAGCTGATTTCGGATGCCACTGCGTCCGCCGGGATGGGGCTGATTGAGCTCAGGAGGATTGAGGCGTCTAGGGAGGTCGCTGCCACGCTGGCCAAGTCGCCGAACGTGGCCTACTTGCCTGGAGGGAAGAACTTGCTCATGGCGCTCAATGCCGGTGGACGTTGATTCATGTATCTCTGTGTGTGGTTTTCACGATACGGTGTAATGGCATGCTTGGAAGGAATGCTGTTGAGGTTCTTCTTTGCTGGGGTTATTTTTTCCCCACCTTGTTTTGTAGACCCCATTTGTAACATGTAGAATTTGGACCTTCGCGTTGAG
Gma.14281.1.S1_at	BI968274	At5g38470	1e-92	Cell Growth & Division			TGAGATTGATTCGAGACCATCAAGCTGACTTCCTTCGCNTGATAAATGAACCTGCNGAAGGTGNNGAAGGGAANATATTGGGGCAGATGGCTTCTGNNATGCCACAAGCAGTAACNGTCACNCCTGAGGAGCGNCANGCAATTGAACGTCTTGAAGCAATGGGTTTTGATCGTGCAATCGTATTGGAGGTGTACTTCGCTTGNAACAAAAATGAGGAATTGGCTGCCAACTACCTTTTNGATCACATGCATGAGTTCGAGGAACAATAGATCTNCTTTNGAATTTGCCAAATTATTTCNTGTCATCTTTTTNTCTCGATGGGTCTTTGTTACANNCTATGTTTAATGAGGTAATGCTTNNGATAATGTCAAATCTCAAGTGGATAAGGGATGTTTTANT…
Gma.15130.1.S1_at	CA935370	At2g19770	2e-49	Cell Growth & Division			GAAATAACTGCTATCATGAATGACTTTAACGAGCCTGGATCACTTGCTCCAACTGGATTGTTTCTCGCTGCCACCAAATACATGGTCATCCAGGGCGAGCCTGGTGCCGTCATTCGAGGCAAGAAGGGTCCTGGTGGTGTTACTGTGAAGAAGACCGGTGCGGCCTTGATCATTGGCATTTATGACGAACCAATGGCTCCGGGTCAGTGCAACATGGTAGTGGAAAGGCTTGGTGATTATCTCATTGAACAGGGTCTCTAATCCTCTATTTATGTCTTGCTATCGTGCATATTTCATTGGCTTCTGTACGAGTTTTTGCATCGACCTCGACTGTAATGCTTTGATTGCAGTGTAATAATATTGTTGGGTGGGTATCAAAAGTCACGGCATGTGCGTGTT…
Gma.15151.2.A1_s_at	BU577357	At3g27280	7e-18	Cell Growth & Division			TGCTGTGTGATGACATGCTTGGATCATCNTTGTCTTTAGTTTTTCCGTTGTTGGAAATATTTTTCTTGTGTTTTCACTTGTAGACTCTCTCATTTGAGCATAGTTCATAATGATTTTAGGAAGGTAATAAGTTAGAAATGAATTTGGACCTTCGTTTTTTCATGGTGAAAGGGTCTGTTTAGTTGCAGAGTAAAAACTATCTCCAAAGTATATAAGGTGAGAGAGGAACTTGAATACTTGATTGTGTGGTTAATGTTGGTTCTTTGAC
Gma.2432.1.S1_at	BU544962	At1g67230	6e-08	Cell Growth & Division			GTGGTGATACCATCGGGACCTTTGTCAACAATATGGCCTTGAGTGAGGAGGTGAACGGAACAGCAGATGATGTGGAGGAGAATGATGCTGAGTATAGGAGTGAATCCCATGGGGAAGATGCTGCTGGTGGAGTTGAGAATGAGGATGACNAAGATTACCTGCAACCCGGTGAAGCTTCAATAGGGAAGAAGCTTTGGAATTTTTTTACAACATAACACCACAAGCTTCTTGATAATGAAGCTGTGTCTTGACCTCATCAACTTTAGGGATGATGTCGGAAGTTTATCTTGTATTAACAATTGGAAGTAGATCTCTAAATTATAACCACGAGGGGTAGTACTTAGGAGAGGTGATTGAATTTCTCTAGTTTTTTTTTTCTTGTACGTTTTCATGGATGTT…
Gma.2911.1.S1_a_at	BM891517	At5g56950	1e-106	Cell Growth & Division			CCCTTCTCTTATTTTGCGCCTGGTAGAGAGAATGTGGTTATAGGTAGAGATGCTGTGATTTGT
Gma.2911.1.S1_at	BM891517	At5g56950	1e-106	Cell Growth & Division			GCAGCAGTAGATGCAGAAGGTCATTTATGTAGTTGTTGAGTTTTGTTGGTGTTCGAGAATGTTTGATGTGAAAGTGGGTTTCATGTTTTAATGCTTCTTAAGTTGATTTTCCTCACTATATCTTGGTAGTTCGAATTTGTTGAGAGTCCCT
Gma.2911.1.S1_x_at	BM891517	At5g56950	1e-106	Cell Growth & Division			GACAAGATTATTCCCCATGCTGTATCATGGTTTACTGGGGAGGCCATTCAGGGGGANGAGTTTGGAGATCTGGAGGATGACGAGGATGATGAAGATATTGAAGAGGATGATGATGAAGAGGAGGAGGAAGATGAAGATGACGATGATGACGAAGATGATGAGGAAGAAAGCAAGACTAAAAAGAAGTCATCAGCACCTAAGAAGAGTGGAAGAGCACAGCTTGGTGATGGCCAGCAGGGTGAGCGACCTCCAGAGTGCAAGCAGCAGTAGATGCAGAAGGTCATTTATGTAGTTGTTGAGTTTTGTTGGTGTTCGAGAATGTTTGATGTGAAAGTGGGTTTCATGTTTTAATGCTTCTTAAGTTGATTTTCCTCACTATATCTTGGTAGTTCGAATTTG…
Gma.2911.2.S1_a_at	BU926887	At5g56950	1e-15	Cell Growth & Division			GGTGTTCGAGAATGTCCTAATGTGAAAGTGGGTTTCATGTTGTTTTTTAATGTTTCTTAAATTGATTTTCCTCCCTATATCTTGGCAGTCCGAATTTGTTGCGAGTCCCTTCTCTTATTTTGCGCCTGGTAGAGAGAATGTGGTTATAGGTAGAGATGCTGTGATTTGTTTATGCTGGAATTTGTACTGCCATCAGTATACTTGA
Gma.3450.2.S1_at	BE329952	At1g62040	7e-56	Cell Growth & Division			AGGCTGAGTCTGCTCGCATTAGAGACAAGTATCCTGATAGAATACCTGTGATTGTTGAGAAAGCTGAAAGAAGTGACATCCCAGACATCGATAAGAAGAAGTACCTTGTCCCAGCAGATTTGACTGTTGGCCAATTTGTTTATGTTGTCCGTAAAAGGATTAAGGTCAGTGCAGAGAAGGCTATTTTTGTTTTTGTCAATAACACTCTACCTCCAACTGCCGCTTTGATGTCTTCTATTTATGAGGAAAATAAAGACGATGATGGTTTTCTTTACATGACTTACAGTGGAGAGAACACTTTCGGTTCTCGCTAGGGTCAAATTTAATAATATATGAGATCCTCTGTAAATAGATGCTGCAAGATGTAAACTTTCTGCTGTCGATAGTCGATGCCTATCC…
Gma.431.1.S1_at	CD390728	At2g29570	1e-126	Cell Growth & Division			GAATACTTCTGTGGACAAGCCTGAAGAAGCNACTGTCATTGAGATGAATGAGCCNGTGTCCTTGACATTTGCTTTGCGATATATGAACTCTTTTACAAAGGCAACGCCATTGTCNAACACAGTTACCATTAGTCTNTCAAATGAGNTGCCAGTTGTNGTNGAGTANAAGATTGCTGAGATGGGTTATGTGCGGTTCTATTTGGCTCCCAAGATAGAAGAGGATGAAGAAGATACGAAACCTCAAGTTTAATCTACCTATTAGNNNNNNNGGTTAGGATATTAGGATTTTAATGTCTTTGAACTTGTAGCTTTCGTCATACATCTTCTGTTGAAGATATTTTAACCGTGTGAGCAATGAATTCACATTTTGTGGATTTCTTAGATGTGTATTGGTTACCT…
Gma.437.1.S1_s_at	CD401627	At4g29350	3e-44	Cell Growth & Division			GAGTATGAAAAGTCACGGGATCTGCGTGTNGNGAAGAAAGTGTTTGATGCTTGAGAAATGATGACTATAATCTCTATCTTTGTACTTTTTTAGTGGGGTACCTGTATACATTACA
Gma.4420.1.S1_s_at	CD390821	At5g38470	6e-94	Cell Growth & Division			AACAGTCAACAGTTCCAAGCCTTACGCGCTATGGTACAGGCTAATCCACAAATATTGCAGCCTATGCTACAAGAGCTTGGCAAACAAAATCCTCATCTTATGCGATTGATTCAAGAGCATCAAGTTGACTTCCTTCGCCTAATTAATGAACCNGTTGAAGGGGGTGAGGGAAATATACTGGGACAGCTNGCTNGTGCCATGCCGCAAGCAGTGACNGTCACCCCTGAGGANCGGCAAGCAATTGANCGTCTCGAAGCAATGGGNTTTGATCGTGCAACTGTATTGGAGGTGTACTTNGCTTGTAACAAAAATGAGGAGCTGGCTGCCAACTACCTTTTAGATCACATGCANGANTTTGATGAATAATTAGATCTCCTTTNCAATTTGTCAAAATANTTG…
Gma.5244.2.S1_at	CD415693	At2g32080	4e-63	Cell Growth & Division			TTGTCTTCGAGTCTGATTTGTGTTATTTTATTTTATTTTCCCTCAGCCTCCTTTCTTCTTCTCATATTGTTCTTCCATTAATGCTTTTGAAATAATGCAAACTCTGGTTGGTCAGCAGAATAATTTGAATTGCTTGGCAAGGTTAATATGAATAGGAATAACGGAAGAAAAAAAGGATCAGAGACTTGTACTTGTTTGGATAGTTTGGCACCCAAGCTACAATCTGTAATAATGTTTGATTGTTTATTTTGCGTTCCTTGCACAGATTTCGCATGGATTTAAGTTCTCATGCCTACCATATGTTAGGTTGGTGACTTAACTATTTTGTAGGGTTTGGTTTCCATCTAACAGCATGAACTT
Gma.525.1.S1_at	CF921971	At5g61640	7e-68	Cell Growth & Division			TGGTTTGCACCGGAACCACTAACCACGTTGAAGTGGTTCGGGTCCAGTTCGACCCGAAGGTTTGCCCCTACAATGATCTACTCGCTCTCTTTTGGTCTCGGCATGACCCCACTTCCATCAACCGTCAGGGCAATGATGTGGGTGCACAGTATAGATCAGGAATATACTACTACAACGATACCCAAGCTCGTTTAGGCCAGGAATCAAAAGATGCAAAACAATTGGAACTGAAGGAGAAGATTGTGACAGAAATACTTCCAGCAAAGAGGTTTTACAAAGCAGAGGAATACCATCAACAATATCTGGAGAAGGGTGGAGGTCAAGGCAACAAACAATCCGCAGAAAAAGGCTGCACTGATCCCATCAGGTGCTATGGCTGATGAATGATGATCACTTTCT…
Gma.5287.1.S1_at	CD403895	At3g48390	3e-62	Cell Growth & Division			GTGTCTTATTGTTTCTCTCATGTGTGTTGTCCTTTAGCTCCCACCGAATGGTGAATATGGATAATGGATAAATCTGGCTTCTAATGATCCTTTTATTTTTTTGTTCCTTTTACTTACTCTTTTTTCCCTGAATCATCTCACCGACAGAGTTTCCTGTTATCTCAGCCATTGTATAAAGTTAAGTTGGTCGCATTCCATTAACAGCTTTTTAGGATGTTGTATTGCACCAAGA
Gma.5418.1.S1_at	BG237178	At2g21770	3e-50	Cell Growth & Division			GCTATTCTCCTGTCTTCAATCTTAACCCTACTTTGGGTGAGAATCAACCCATTNTTGGCCAAAAGTGATGTGGTGTTGGAAATTTGTGGATTGAATTGTGACTAAAGGTAACAAAAAATGGAAGGGCATGCCATGGTTTGACGTTTTACACTGATAAGATCTGCAACATGCATAAGTTTTTGGTCAAAGACACATGACACATCCCTGGATCTGTTGGTGAGAACTGCCACTGCAAAAAAAAATGTTATTNGTGGGTGGTGTTTGTAGATACAANANTATGTTTTGAGAGGTTTCATTATTTTTTTTTATACATGTGCATTATCTAAATTAGTCTGAAATCACAGGTGAGATGTTATTTATAACTTCTTCGGAATAAGGCATCTCTCATTTGTAATCATA…
Gma.5497.1.S1_at	CD414002	At2g27960	9e-39	Cell Growth & Division	Cell Cycle		TCCGAAAATGAGTGGCGGGCAATTGGGGTTCAGCAGAGCCGTGGCTGGGTTCATTATGCAATTCATCGCCCTGAGCCACACATAATGCTCTTCAGGAGGCCTTTGAATTATCAGCAGCAGCAGGAAAACCAGGCCCAGCAAAGCATGCTTGTCAAATGAACACTATCTATGCAAATCTGAAAGTGGGATTACAATGTTATATAGGTTTTAATTTTGTTGGTAATATGGATGTTATGAAGAATGAAGAACCCTGGTGGAATTCTCTTTTTGTGGAGAATTTTCATGTGGTTTCAACTGTCATTTTAATGTGTTGTTGACATGATGATGTGTCATGGATTTTTATTGGTGTACCTCTCGTGTACTCTTATNNGCTCGGTGGATTATATAATAGTCATTATC…
Gma.5497.1.S1_s_at	CD414002	At2g27960	9e-39	Cell Growth & Division	Cell Cycle		GCCACACATAATGCTCTTCAGGAGGCCTTTGAATTATCAGCAGCAGCAGGAAAACCAGGCCCAGCAAAGCATGCTTGTCAAATGAACACTATCTATGCAAATCTGAAAGTGGGATTACAATGTTATATAGGTTTTAATTTTGTTGGTAATATGGATGTTATGAAGAATGAAGAACCCTGGTGGAATTCTCTTTTTGTGGAGAATTTTCATGTGGTTTCAACTGTCATTTTAATGTGTTGTTGACATGATGATGTGTCATGGATTTTTATTGGTGTACCTCTCGTGTACTCTTAT
Gma.5594.1.S1_at	BQ786297	At3g09840	3e-21	Cell Growth & Division			AGAAATCAAGGCTGCTCATTTTGAGGAATCAATGAAATATGCTCGAAGGAGTGTTAGCGATGCTGACATTCGCAAGTACCAGGCATTCGCCCAAACATTACAGCAGTCTAGAGGATTTGGAAGTGAGTTCAGGTTTGCAGATTCCACCTCCGCCGGTGGTACAGCTGCTGCATCTGACCCATTTTCCTCTGCTGGTGGAGCTGACGAGGATGATCTTTACAATTANNTNNNNTTGTATGCCTGTTATTTGTTCGTATATGCCGTGCTATCTTAATTATCTACTTCTCATTTCGTGTATGCAAATGAGGTCTGTAAACGCTTCCTTTGGATTATTATTGTCTATTGTTTTTGCAAACGGCATTTGTTCATATGGCCAGAGCATTAGGTTCGAGCCTCTTC…
Gma.6330.1.S1_at	BE658773	At1g62040	4e-58	Cell Growth & Division			TAAGAGAGAAGTATCCTGACAGAATTCCAGTAATTGTTGAAAGGGCTGAGAAGAGTGATGTTCCTGAAATTGACAAGAAAAAGTATCTTGTACCCGCTGATTTGACTGTTGGTCAGTTTGTGTATGTGGTGCGGAAGAGAATCAAGCTGAGTCCTGAGAAGGCGATCTTCATTTTTGTTAAGAATATTTTACCACCAACTGCGGCAATGATGTCTGCAATTTATGAGGAAAACAAGGATGAAGATGGCTTTCTATATATGACTTACAGTGGAGAGAACACATTTGGGCTTGTGTTCTGAAATAATCCGTCGTGACAGGCAACCATCTGAATAGAACTTCCTAAAATTGACCAATGTTAAGAAGTCAGCTTAATTGTAAATTCTCTGGTTTGATGCTTTT…
Gma.6791.1.S1_s_at	BE801043	At1g03080	8e-15	Cell Growth & Division			ATGTGTGCGACCTCCCACCAAGGGAGATTGATTGTTACCATATAGTTTGAAGTAAGTGAGACATTAGCTTTCTTGTTTGTAAAATTTTGTTTCTAAGGATGCTTCAAGACCCTACATATTTTGATCATGCTGTACATGTTGTGCCTCATTTACTCGTAAGAAGAGGCCAAGGCTA
Gma.8173.1.A1_at	BF598954	At1g26830	6e-97	Cell Growth & Division			TCGAAGCAGCCATTGTGAGGATAATGAAGTCTAGGCGGACTCTAGATCATAATAATATTGTTGCTGAGGTCACAAAGCAGCTGCAGTCACGGTTTTTGCCTAATCCTGTTGTTATTAAGAANAGGATTGAATCCCTTATTGAGCGTGAGTTTTTGGAGAGGGATAAAGTGGACAGAAAACTGTACCGCTATCTTGCTTGAACTGTATGTGCTTTTGATTTGGCATGGCNCTTGTGTGATTCTGTCTGTCATAAGTTTGANTGCACATCACAAATTGCCGCAAGTAGTGTAACTCTCNNNTGCATACTCAACNAAACCTAGATTTNTNAGGGTTACTTCNTTTCAGGCTGCNAAACTTNAATATATCNNNTTTNNNTNCTTANNTNTANNNAAAAATAAA…
Gma.9505.1.S1_at	BI786624	At5g63190	1e-105	Cell Growth & Division			TCTTTCAAAATTATGTCACCGACAGATATTCCTATGAATCTCAGTCGTTGTGTAAATTTGGTCTTATATTTCGTTNANAGCTTTTTAGAATGGTGTTGCGTCAAGAGGTATGAGAGGAATATAGTGTATTTTTCAGCCTTAA
Gma.9509.1.S1_at	BU550018	At5g61960	2e-42	Cell Growth & Division			AGAAGAGTCTGCTAATGGGATAGACTCTTCAAAAATCTCTAACTGATTTAGCCTTCCTTGGGCACTAACTGTTCAACATTGCACCATAATGCCATGTCAACCCCCCAAGTCTGTATGTATATTGACATTTTCTTTTTATGAGAGAAGAGCCAGGAGGAAAAGGGGCTCACAATTTTTTTGCTTATAGAGGAGCCTTAAACACAAGTTTTCTGAGGCTAAGGTACATAACCAGAATGAAGTCACTGATTGTAGTAACTTTTCTTTATTTCCTAAATTTTTGCATGTAGTCCTGCTACCTACCTTCTCACGAGTTTAGAGAATGGATTTAACTGAAGCTCAAAATTTTTGTTAGCTTTGAACAGATGATGTCTCACCATTTGCATTAAATTCCCTTCAGAG…
GmaAffx.12491.1.S1_at	BE347527	At1g58025	3e-09	Cell Growth & Division			ATAGTCAGTCTGTCTGGAGTGGACCACACTCACTAATACGGAAGACAAATTCTGCTCGGACTAGTTCAATTCACGCTGCTATAAGGACTTTCATGGAGTAGCTTTTTATCTTTATCAGTTCACTACACTTCCTAGCAGCCTATGTCATTAATATTTTAGTTGATGTCCCTTCGTTATTATATGGTGTATTATAGTTCTCAGTTTCTTGATAACAACAGCAGATTTTGTAACAGAAGAATTTGTGCTTCAAACCAGTTCTACTTAAAAAATTATGAAAGNAAAAGTAACCTGCCACTTGCCGTCATAGCTCAAGTGGTCAA
GmaAffx.36227.1.A1_at	BU551398	At3g03050	3e-72	Cell Growth & Division			AGTTTGCTGATCTCTATATTGTGAAATGGACATCCCTTATGATTCCACCTATCACAATTATGATGGTCAACTTAATAGCAATAGCAGTTGGAGTAAGCAGAACCATATACAGTGTCATACCACAGTGGAGCCGTCTACTAGGTGGTGTTTTCTTCAGTTTTTGGGTCTTGGCTCATCTCTATCCCTTTGCAAAAGGTTTGATGGGAAGAAGAGGGAGGACACCTACCATAGTTTTTGTGTGGTCAGGCCTCATAGCAATCACAATTTCTCTCCTCTGGGTGGCTATCAACCCCCCTGCTGGTACTGACCAAATTGG
GmaAffx.74863.1.S1_s_at	BQ785704	At5g56950	5e-49	Cell Growth & Division			AAAACTCATGTTCTCTCTTGGCAAGAACTAAACTTGGCATACTTTGCATAATAAAGCCACAGGGTAGATTATTCACTAATAAAAAATAAATTTGTGTGTCTTTGTCAACCAAAAATACAAAACTGTATGAATAGGATTTGTTCCAAGTAGATT
GmaAffx.88982.1.A1_s_at	CK605701	At4g24010	2e-24	Cell Growth & Division			CGGACCCTTGGTTTGCAGTGTTTGCATTTGTGTATGTATCTACTCAAATTCAACATTTGATTGAGGTTCTATCTGGGGATGGCTCTGTGGCTATGTGGTGGGATGAACAAAGAATTTGGATTCTGAAGTCAGTTACCAGCATATTTGCAATTATAGATGGAATCAAGAAGTGGCTGGGGTTGAACAAGGTGAAATTCAACTTGTCAAACAAAGCCATTGACAAAGAGAAGCTCAAGAAATATGAGCAAGGTAGGTTCGATTTCCAAGGTGCAGCTGTGTTCATGGCTCCATTGGTCCTATTACTCATAGCCAACATTGTTAGCTTCTTTGTTGGTATATGGAGACTATTCAATTTCAATGTGAAGGATTTTGAAGAAATGTTTGGTCAACTTTTCCTAG…
GmaAffx.89786.1.A1_s_at	CK605840		1.1e-24	Cell Growth & Division			CTCCACGGCCAGCTTCTTAGAGGGACTATGGCCGCTTAGGCCACGGAAGTTTGAGGCAATAACAGGTCTGTGATGCCCTTAGATGTTCTGGGCCGCACGCGCGCTACACTGATGTATTCAACGAGTCTATAGCCTTGGCCGACAGGTCCGGGTAATTTTTGAAATTTCATCGTGATGGGGATAGATCATTGCAATTGTTGGTCTTCAACGAGGAATTCCTA
GmaAffx.89786.1.S1_at	CK605840		1.1e-24	Cell Growth & Division			TCCTTACTATGTCTGGACCTGGTAAGTTTCCCCGTGCTGAGTCAAATTAAGCCGCAGGCTCCACTCCTGGTGGTGCCCTTCCGTCAATTCCTTTAAGTTTCAGCCTTGCGACCATACTCCCCCCGGAACCCAAAGACTTTGATTTCTCATAAGGTGCCAGCGGAGTCCTAAAAGCAACATCCGCTGATCCCTGGTNGGCATCGTTTATGGTTGAGACTAGGACGGTATCTGATCGTCTTCGAGCCCCCAACTTTCGTTCTTGATTAATGAAAACATCCTTGGCAAATGCTTTCGCAGTTGTTCGTCTTTCATAAATCCAAGAATTTCACCTCTGACTATGAAATACGAATGCCCCCGACTGTCCCTGTTAATCATTA
GmaAffx.90790.1.S1_s_at	CF806515	At5g63190	2e-47	Cell Growth & Division			GAAGCATGCCAGTGTATCCGTGACCTGGGAATGCCTTTCTTCAACCACGAGGTTGTCAAGAAAGCTTTGGTTATGGCCATGGAGAAGAAGAATGATAGGATGCTGGATCTGCTGCAGGAATGTTTCAGTGAAGGTCTAATAACCATCAATCAGATGACCAAAGGGTTCACCAGAATCAAGGACGGTCTTGATGATCTCGCTCTGGACATTCCAAACGCTAACGAGAAATTCAGCTTCTATTTGGAGCATGCCCTGAAGAAGGGCTGGCTCCTACCATCATTTGATTCCACTGCCACAGATGTCTAACTGGCCCAGGCTGCAGCAGCTTCTTGAGGAGGACTATATTTTCATTGTTTCTCTTATATATGTTGTTGCACTTTAGCTTCCGCTGAATGTGGA…
GmaAffx.91087.1.S1_s_at	CF806812	At4g11050	1e-22	Cell Structure			AGTCTCAATTCTCTCAATCTTTCAATATCCAAGCTTTATGGTCCAATCTGGGGTGTCACAAAGTCAGGTGATTCATACACATTCCCATCATGGCTCAGCTCATTATCAGCTGGCAAAAGCCTTGAATTTGTCTACATCCATTCTGCTTCTCCAGCAGATGTCTCCGTGGCGAACTACGTGTTGGCCTGAAAGTGGCATGGGAATGGTTTACTGCTTTCTTGTGTAAGACTGTGTAGCCATACAAATGTGCAGCGAGGGGAGTGTCTTTACGTTTTTCCTTCTATAATTTGGTGTCAAATCTTCTTCTTCTTCTTCCCTTGTGTATTTTGCATTTCAGTAGGTTAGATCAAAATAGGTAGATTATATAAGATGGAAGGACCGGAGCAGAAAGGAGTGAAG…
GmaAffx.92070.1.S1_at	CF807049	At4g34050	1e-110	Cell Structure			TATGAATTGGGGTTGCCCGTGATTGAAAAGGCTGGA
GmaAffx.92828.1.S1_at	CF808553	At1g11580	2e-92	Cell Structure			ATAAACCGCTGTCGCATTGATGCCTTCCAAGACACTCTCTACGCTCACTCCAACAGGCAGTTCTACCGAGACTCTTTTATTACTGGCACTGTTGACTTTATATTTGGAAATGCAGCTGTTGTTTTCCAAAAGTGCGACTTGGTGGCCCGAAAGCCCATGGATAAACAGAACAACATGGTCACTGCCCAAGGACGAGAAGATCCAAACCAGAACACAGGAACTTCAATTCAACAATGTAACCTAACACCAAGTTCGGATCTTAAGCCTGTCGTGGGCTCCATCAAAACTTTTCTAGGGCGCCCATGGAAGAAGTACTCCAGAACTGTTGTGATGCAGTCGACATTGGACAGCCACATTGACCCAACAGGATGGGCTGAATGGGATGCCCAAAGTAAAGAC…
GmaAffx.93161.1.S1_s_at	CF808886	At5g09810	1e-86	Cell Structure			GCTGAGGACATTCAACCTCTTGTTGTTGATAATGGAACTGGAATGGTCAAGGCGGGTTTTGCAGGTGATGACGCTCCTAGGGCCGTGTTCCCCAGTATTATTGGGCGACCACGCCATACCGGTGTAATGGTTGGGATGGGTCAGAAGGATGCTTACGTGGGTGATGAAGCTCAATCAAAAAGGGGTATACTCACCTTGAAGTATCCTATAGAGCATGGCATAGTCAGCAACTGGGATGATATGGAGAAGATTTGGCATCACACATTTTACAATGAGCTTCGTGTTGCCCCTGAAGAACACCCTGTACTTCTTACCGAGGCACCCCTCAATCCCAAGGCCAACAGAGAGAAGATGACCCAAATTATGTTTGAGACTTTCAATGTGCCTGCCATGTATGTT…
GmaAffx.93438.1.S1_x_at	CF809163	At1g50010	5e-71	Cell Structure			CAACACCTTCTTCAGTGAAACTGGGGCNGGAAAGCACGTGCCNCGNGCGATTTTTGTAGATCTNGAGCCNACTGTGATTGATGANGTTAGGACTGGGACATACCGCCAACTATTNCATCCTGAGCAGCTCATTAGNGGAAAGGAGGATGCNGCAAACAACTTTGCCCGTGGCCACTATACCATTGGAAAGGAGATTGTTGANCTTTGCTTGGANCGCATCAGAAAGCTTGCTGACAACTGCACNGGTCTCCAAGGTTTTCTGGTTTTCAATGCTGTG
GmaAffx.9520.1.A1_at	BI970995	At3g19960	3e-12	Cell Structure			GCGAAGATGGCGCACTTGAGAAAATGAAGAAAAAGTGGTGGGGAAGAAGGAACAGTACAAGGATAAATTGATTTTTTTTCAAAATTTTTAATTTATCTTTTATTTTTTTGAGTTCGGTTTTGGTCTATGCACTGTTTCAAGAGCATTGCCAACTATATATATCCGAAAGTGAGGAAAATACAATAGGAAAGGTAAAAAAAAAAAAAGGAGTGGTAGGAAGAGTCCAAGGATGAGTGAATTTAGTGTAGTTTGGGTTNGTTGTTGCTANCCACCTTTCTTTAATTAGTAATTTCTGCATGAATTGTTGAGTAAGATGTATACTACAAACCTTAGTGATTCGTGTATATCGCTGATGCCCATGCCTTTTCTGGTATGTGGATTGCATGTCAAATTTGTTGT…
GmaAffx.9561.1.S1_x_at	BI974310	At5g65360	0.0005	Cell Structure	Histone		CAAACCGCTCGTAAGTCCACAGGAGGAAAGGCTCCTAGG
GmaAffx.90027.1.S1_s_at	CF805750	At1g11580	2e-19	Cell Structure			CAGGCCTAGAAAATCTGTTTCCAAAACTATCTGCTTAATCTTTTCTATAGCTGCTGTCATGATCTCATCAGCCTTTGTTGGTTCTTATCTCATCAAATCCACCTCCTTCTTCAACCAATCCTCTCCTCAACATCTCTGTGATCATGCACTTGATAGGGCAACATGTTTAACCCATGTCTCAGAAGTGGTACAAGGTCCGATCTTGACCCCCACAAAAGACCACAAATTCAATTTGTTACAGTCATTCCTAATGAAATACACCTCACACATTAAGAGAGTTATGAACACAGCCAGTTCTATCAAACTTAGGATCAACAGTCCCAAAGAAGAAGAAGCTTTGCACGATTGTGTGGAGTTGATGGACTTATCTATCAGCAGAGTTAGGGACTCAATGGTGAC…
GmaAffx.90097.1.S1_at	CF805822	At3g55500	2e-24	Cell Structure			GTCTAATTACTATGTTTCATGGCTTTTTTTTTTTTTTTTTTTTTACCTCTGTAGTTTTGAATTTACCTTGGGATGTGGATATAAGGGAAACGGCGAGAAAAAAAATGGTGGGAAAGTAATGTTGTGGTAGTGATTAGTCAAACTTTTTGACTTTTTTCGTTGTCTTGGTATACGAGTTTGAAGTTTTATAGTAGGATTCTAGGAAAATGGAGGGAAACTTTATGTAACGGGCTGAAGTGGCTTCAAATGCATGAGCCCGCAGCTAT
GmaAffx.90181.1.S1_at	CF808382	At5g09810	4e-55	Cell Structure			AGTGCTTCTAAGTTGGGTCAAGAGCTGGATGGT
GmaAffx.90437.1.A1_s_at	CF806162	At5g19780	6e-73	Cell Structure			GTATGCCAAGCGTGCTTTTGTCCACTGGTACGTGGGTGAGGGTATGGAAGAAGGTGAATTTTTTGAAGCCCGTGAGGACCTTGCAGCCCTTGAGAAGGATTATGAAGAAGTGGGTGCTGAGTCTGGTGAGGGCCAGGAAGAGGATGAAGACTACTAGAATCTACTTCAGATTCTTGTTCTTGTGGTCTGTTTTCTGTTGTGTTTGATGTTCAGATGTGTACCAGTACCGATGTGGTTTTAATTTGGATGCATTGCTTTTATGCTTCGCTGCTCCTGTTACGTACCTAAACTGAA
GmaAffx.85041.1.S1_at	AI938331	At5g59910	1e-42	Cell Structure	Histone		GTACACCCTGACATCGGTATTTCTAGCAAGGCCATGGGGATCATGAACAGCTTCATCAACGACATCTTCGAGAAGCTCGCGCAGGAAGCGGCGCGTCTCGCCAGGTACAACAAGAAGCCTACTATTACCTCCAGGGAGATTCAGACCGCGGTCAGGTTGGTGCTGCCCGGGGAGCTTGCCAAGCACGCCGTTTCTGAAGGAACCAAAGCCGTTACCAAGTTCACTAGCTCTTAGAGTTAGGGTTTTTTTTTTTTTTTTTTTTTTNCTGTAAAGCTAAGTCGTATAGCTAGTGGCTTCTTTTCGGATTCTATATGCCTATGAATTTGTGATTCTATTAGTCCC
GmaAffx.88786.1.A1_s_at	CK606552	At4g34050	1e-108	Cell Structure			AGTGTCTACCCAAGAGAACCTGAATCCATGAAAGAACTGAGAGAGTTGACAGCAAAACACCCATGGAACATCATGACAACCTCTGCAGACGAAGGGCAGTTCTTGAACATGCTCCTTAAGCTCA
GmaAffx.88908.1.A1_x_at	CK605775	At5g59880	1e-64	Cell Structure			CAACCTTGCGTTTGAGTGCCATTTTAGTCGTCTTATCCCTTACTAGTTGAATTTGTAACTGTTTGTGTTATCAGACAAAAAATGGGGTTTCTTCACTTATTGACACTCGTC
GmaAffx.74332.1.S1_at	AW348552	At4g10840	2e-61	Cell Structure			GAATTCTTGAACAGGAGTGTGGCCCNTGTCATCAGGATACTCTTGGGGTGTACAGCAANCTTGCAGCTACATATGATGCTATGGGAAGAGTGGGAGATGCGATTGAAATCTTAGAATATGTTCTCAAGCTGAGGGAGGAAAAGCTTGGGATAGCAAATCCTGATTTTGAAGATGAGAAGCGTCGTCTGGCNGAGCTTCTGAAAGAAGCAGGCAAGACACGGGACAGAAAAGCAAAATCTCTGGAAAACCTTATTGATCCTGGCTCAAAGCGGACGAAGAAGGAGGGGGCAAAGAGGTGGCCTGGTTTGGGGTTTAGAATTTAACCATAGTTTTATTCATTTAAATATATATATTGAATGCACATTCTGTAACATAGGATATCTTGTATAGGGTTGAATA…
GmaAffx.6454.1.S1_at	BQ740636	At3g04710	1e-33	Cell Structure			AAGGAGCGGCTCTGCGTTTGTTGCAGAAATTTGATGAAGCTGCAAATGCTTTTTATGAGGGAGTAACGCTTGATCCTGAAAATAAGGAGCTTGTAAATGCGTTCAGGGAAGCTGTCGAGGCTGGGAGGAAATTTCATGGAACGGCTGAAAATAAATCATAGTTTAGCCTTTTGTTAATACCATGTTTCAGAGAGAAGAGATCAAAATATTGCGGGTGGTGCAGCCTTATTCACTTGATCCTTTTTTCCCCAATGTGTGTGTGCGTGTTTTCTTTAACTAGTTACTGTCGTATAGGAAGAGTCAGCTAGTAATCTGTTTCATTAAATTGTTTTAGTAATTATAAAGGTTATGCTTATTTGACATGTTCCAAAATTGTTGCAGAATTAGTACACATTATGA…
GmaAffx.6824.2.S1_at	BQ094655	At1g14890	2e-50	Cell Structure			GGGAATGCCTTGATTTTCAACCACGTGTCAGATTACTTACCGTCCGATTTTATACATCTCCAAACTCGAAAAAAAAAAAAAAGTAGTTAAAGAATAGGTTGTGTTAAATTTGGCGTTNAAAAACAAAAAGTGCCGTGTGTGTGGGACGCGTGAGCCCTTCTTTCTTGTGTTGTAAATTTTGGTATGCTTGTAGACATATTTGCTGTCACTCGCTCAAGAAAGTAGAGAAACGCATCACTTCAATCACGTGATAGAATGAATGAAGAGTGTAGATAACTATATGGGGGGAAGAAGAAAAAACAAGTGAAAGTTGAGTGTGGAACTTTGACTTGTTACTTT
GmaAffx.68709.1.A1_at	BI969418	At1g71380	3e-32	Cell Structure			CTTGCCTTCAATAGCAGCTCATCCACAAAGCATAGGGTGTGATGGAGGTTTCAACCCATTTTTCCATTCGATGAATCCTAATCCTAACATATTGGTTGGAGCCATAGTCGGAGGTCCAAACCAAAATGACGGATTTCCAGATGACCNNAGTGATTACAGTCATTCTGAGCCTGCAACTTACATCAATGCTGCTTTTGTTGGACCTTTGGCATACTTTGCCGGTATCCGCTAATGTTTCATTCACCTAAATTACAAGGTTAAGTCTAGATGTCATTTTATCTGCACCCAAAT
GmaAffx.70462.1.A1_at	CD391648	At1g54690	7e-29	Cell Structure	Histone		CTTGCCGAATATTCATCAGACTCTACTTCCCAAGAAGGTTGGCAAGGGGAAGGGCGAAATTGGATCAGCTTCTCAAGAGTTTTAGGTTTTTNGTTAGGCCTATTTGGACTATAGTTTTTATTTTATTGCGGTTGTAATATACATGTTTTGGTTAATTTTTAGATATCTGCTCTGAGGAATTAAGTGTTTCTCAGTCTTTTGAACTGGATGATTAATCTCGCTTTG
GmaAffx.2378.1.S1_at	BG652106	At3g54560	2e-30	Cell Structure	Histone		TAGTGTTAGTAAGTGTAGTAGGCCTTTGCTACTGTTTAAGAACAGATGTTGATGTTATTGTGTAAATGGTCATTCTATTGGCTTTTAACTTGCCTGTTGTGATACTCCTGGAATTGTAACGCTGTTGGATTTTA
GmaAffx.24396.1.A1_at	BU547464	At3g55260	1e-71	Cell Structure			ATAGTGCACAACTGGTTGGGCCCTGGTGTTTGTCCAAAGGTTGTCGCAAAAGGTTTCAGGTGCATTTACAGTAACCAGGGTGTCTGGTATCTTGACCATCTGGATGTACCTTGGGATGAGGTATATACAGCTGAGCCACTACAGGGAATACATACAGCTTCCGAACAAGAGCTTGTAATTGGAGGAGAAGTTTGCATGTGGGGTGAGACGGCTGATACATCCAATGTTCAGCAAACAATATGGCCTCGAGCTGCTGCAGCTGCAGAACGCTTATGGAGTCAGAGAGATTCTACCTCACAAAATATTACCTTAATAGCATTGCCCCGGTTGCAAAACTTCAGATGTCTATTGAATAGACGAGGGGTTCCAGCTGCTCCTGTCACAAATTATTATGCTAGA…
GmaAffx.29260.1.S1_at	BI471456	At4g12390	1e-49	Cell Structure			TATGCGTCAAGTCTCTGTTGGCCTACGCAAGCGTGATTCGCCGAAGCGACCGACAACTAGCCACGACCGCTCTGTCGGTAAGCATATCGAGGAGCCGATCCTCCGCATGGTTGGTGAAGAAGATGTTGAAAGCGAGAGGCATGAAGCCTAGAGAATACAGAGCGGTGCAAGACTGCGTGGAGAACATTGGTGACAGCGTGGACCGTCTCAGGCAATCGGTTACGGAGTTGGGGCGGACGGGCGAGGACTTCGTCTGGCACATGAGCAACGTCCAGACTTGGGTCAGCGCTGCCCTCACCGACGACAGCACTTGTCTTGACGGCTTCGCTGGTTCCGCCATGAACGGAAACGTGAAGGCTCTTATAANNGACAGGATTGTCCACGTTGCTCAAGTCACAA…
Gma.9164.1.S1_at	CA802402	At5g59970	6e-40	Cell Structure			TTTTCCTCCCAAAATGTCAGGCCGTGGAAAAGGTGGGAAGGGTTTGGGAAAGGGAGGAGCTAAGAGGCACAGAAAGGTTCTTCNTGACAACATTCAAGGAATCACGAAACCTGCGATTCGTAGGTTAGCGAGAAGAGGTGGCGTGAAGAGGATCAGTGGTTTGATTTACGAGGAAACCAGAGGAGTTCTGAAGATATTCTTGGAGAACGTGATTCGCGATGCTGTAACCTACACTGAGCACGCTAGGAGGAAAACTGTTACTGCTATGGATGTCGTTTATGCTCTCAAGAGACAGGGAAGGACCCTCTATGGCTTTGGAGGCTAAAGAATAGAATCTTTAGGTTTAATGACTGTGTTGCAGGATNAAACATTGGTTCTTTTGAATTTGCGTGAAGTTTA…
Gma.79.2.S1_at	AW310410	At4g13340	6e-05	Cell Structure			TTGTTTATAGTGCTATGGCCACGACAAGAGTGTT
Gma.7369.1.S1_s_at	CD399383	At5g59910	1e-41	Cell Structure	Histone		TTCACCCCGACATTGGTATTTCCAGCAAGGCCATGGGCATCATGAACAGCTTCATCAACGACATCTTCGAGAAGCTCGCCCAGGAAGCGTCGCGTTTGGCTCGCTACAACAAGAAGCCCACCATCACCTCGAGGGAGATCCAGACCGCCGTGCGTCTCGTGCTCCCTGGTGAATTGGCCAAACACGCCGTTTCTGAAGGGACCAAGGCGGTTACCAAGTTTACCAGCTCTTGAATTAGGGTTTGTTAGGCGGTTGTGTTGCAGATCTAGGGTTTTC
Gma.7351.1.S1_at	BU082673	At4g31340	2e-51	Cell Structure			GCTAGAGTGTTTTCAGCTGTTTTCTGTAGCAAAAAAGTGANTAAACCTGCTCGAAATGGAAACANTCACCATGCACGACGTAAACNTAAGCGAGGGCATCTAGACAAGCACACAACATGAAGTTGGTTCCTGCTTTATTTTTTTTCNTGGAAAGANNTTAGATAATTTTTCCTGTTCGCANGNGCTTATTGAGGGGNATNTATCTTTCCTGTCGTGTGGGGTTTNGAATATTTTACTTCTCTTTTTTTGGGTGAGGTAACTTTAGGATGTTTCACTGTAGAAAAGGGCACACANTATGTTTAGNTGTTNATGTATTATCANNNNNNNNCTNNGTTATATTTNNTTANNANNCCTTGCACTCCCTTTTCNCTGNTGGTTTTATTTTCTTAAATTCTTGAC…
Gma.7784.1.A1_at	BM269985	At1g69530	0.0007	Cell Structure			AGTATATGCTATAATTTCTCAATTTAAGTGTTAGTATATGACTCCAAAAAAAAGACTAGTATACTAAGGTATTAATATAGTATGCTACTTGGTGGAGGAGGAGGGGGTGGGGTCAAATTGGATCGCAAAATGGTTAAGGGCTTATTTTAAATTGGCTCTTGATCATTTTTTATTGGGTCAAATGGGGGTTCCTAATTCTTGGGGCCTTTTTTTATTATTGGGGNATTTTTATTTTCATTTTTGAAAGCTTTTTCAACCTTTTTGCTGCTGAAAGCTGGTAGAGAGGGAATTTTTATATCTGTGACCTATTAAATTGGAGGAGGTGGACTGTTGCACCACCCGCCATTAGTATAGGAGAAGTTTTTGTTTTTTTTTGTTCCCTAATGGGATTATTTAGAA…
Gma.6302.1.S1_at	BI786195	At2g44450	1e-142	Cell Structure			GATCCAACCCTTTCCGTGGAAGAAGCTCTCATGGATATTTATCGAATTGATTATTATTATCGTCATTTCTTTTATCTTCGATCAGCAATTAAGGCTGGCGCAAACGTTAAGGGATTTTTTGCATGGTCATTTTTGGACTGTAATGAATGGTTTGCAGGGTTCACTGTTCGGTTTGGATTAAACTTTGTAGATTACAAAGATGGCTTAAAAAGGTACCCTAAGCTTTCTGCTCAATGGTACAAGAACTTTCTGAAAAGAAACTAGTGTTAGACCCACCGTTTGAAAGCTATGCAGCACCTAAAAACGGTTAGGTTAAGCTCAATGTTTGTAGTTGTAGCTAATTCCACGTATAAGTCATTAGGTTGTTGTTTTCTGTTAGAATAATTTCATGGCACACTA…
Gma.6283.1.A1_at	CD397881	At5g65360	1e-70	Cell Structure	Histone		GAAGCAACTCGCCACGAAAGCAGCACGCAAGTCCGCTCCGGCGACCGGCGGCGTGAAGAAGCCACACCGTTTCAGGCCGGGTACGGTGGCGCTGAGGGAGATCCGAAAATACCAGAAGAGCACCGAGCTTCTCATAAGGAAGCTTCCTTTCCAGAGACTCGTAAGGGAAATCGCTCAGGACTTCAAGACCGATCTCCGCTTCCAGAGCAGCGCTGTCTCCGCTCTGCAGGAAGCCGCGGAGGCCTACCTTGTTGGGCTGTTCGAGGACACCAACCTCTGCGCCATTCACGCCAAGAGAGTTACCATTATGCCCAAGGACATTCAGCTTGCTCGTAGGATTAGGGGCGAGAGGGCTTAGGGTTTGTTCGTGTGATGTACAAAGCTGTAGTACTTTCTTAG…
Gma.6150.2.S1_s_at	CD416056	At5g59880	6e-60	Cell Structure			TGCAAGCAACTGATCCTACTGAGATGGGTCTTGATGTGTTCAAAAGCCG
Gma.6150.2.S1_x_at	CD416056	At5g59880	6e-60	Cell Structure			GGGAGCTGGATGGAATTCAAGTAGAGNTGCAAGCAACTGATCCTACTGAGATGGGTCTTGATGTGTTCAAAAGCCGNGCCAACTAAAATGATTATANAAAATAGTAGGCTTTCTGGTGGGAGCAGCACNCCTNAAGCCTTAGTTACTCATNNGGAAAATATCCTAGTTTGTGGGATGGTCAACTTGGGTAGTTATGGTCCCAAACTCTCNNAATTTTCCAAGTTGTGGCATAAANTTCTATTGCACCTTTTNACAAGCTTTGCTTGTTCCAGTGTGTTTTATTATGATTTGTGATTTATACAACCTTNGCGTTTGAGTGCCANNNNANNNNNNNNANNNCNNANNANNNGAATNNNTAACTGTTTNGTGTTATCAGACAAAAAATGGGGNTTCTTCACT…
Gma.6406.1.S1_at	CD394756	At5g09810	0	Cell Structure			TGAGTGGTGGTTCCACAATGTTCCCNGGNATTGCTGATAGGATGAGCAAGGAGATTACAGCATTGGCACCNNGTAGCATGAAAATTAAGGTTGTAGCACCACCAGAGAGGAAGTACAGTGTCTGGATTGGAGGCTCNATCTTGGCNTCCCTCAGCACCTTCCAACAGATGTGGATTGCGAAGGCAGAGTATGATGAATCTGGACCATCAATCGTACACAGGAAATGCTTCTAAGTTATAANNATGGAGTNTGAAAGNTGGACCAGGGAAATTACTATTTATACNAANACTACAAAAATACCATCNAGTGGTTGAGGAACTTTCATTTNCCTACNCTTTACCATNCCTTTTATCTATCTTGTTTTTGTGTTTTCCTTTCTTTGNTATGTTGAGATAAGAG…
Gma.5666.2.S1_at	BE609637	At1g75780	0	Cell Structure			GTCATCCACATTTATTGGCAACTCAACATCGATTCAAGAGATGTTTAGGAGGGTCAGCGAGCAGTTCACTGCTATGTACCGGCGCAAAGCCTTCTTGCACTGGTACACTGGGGAGGGGATGGACGAGATGGAGTTCACCGAGGCAGAGAGTAATATGAATGATTTGGTAGCAGAGTACCAGCAGTACCAGGATGCAACAGCAGAGGAGGATGAATACGAGGATGACGGTGATGAGCAGCAGTATGATGACCAGTAGCTGGATCAATCTTAGGGCAATGCTCTGATGGTAATTACCAATGGCGTGATGATAACTTCTGGCACCGATCTACTTTTACTGCTATTCGTGTATCTACAGCCATATGAACTCTATTTCATTCCCATTTATCTCTTCTTTTAAAT…
Gma.5675.1.S1_a_at	BE822313	At5g07840	1e-61	Cell Structure			TCAGTGATAGCAGATTTAACCCACCGCTTCATTACTGTCCCGGGCTGGAATGGGCCTACGAGGAGATGAAGCGACTTCGTCAAGAAGATTTGTCTGCTGGAGAGACATCTTACAGCTCCGAAAGTTAATTTGCTTTTCAGGGACTTGGTTGGTGTTTGATAGTGTGTGTTTGGATGCCGTTCAGAGGAGATCAATGTGTGTCAGATCAGAGTTAATATGACTAGCTTCTGCGTCACCTTTATAAATTTGACATGAAAATTTGTTGATATGTGCATTCAGAAAGCGTATCCAGACATGCA
Gma.5683.2.S1_at	CA935387	At1g11840	1e-139	Cell Structure			TGTCACTGAATACACCAAGGGAAATGCTTATGCACAGGTTGCTATTGGTACTGATGATGTATACAAGAGTGCTGAGGTTGTCAACATAGTCACACAAGAGCTTGGAGGGAAGATTACTCGGCAACCAGGACCANTTCCTGGCCTTAACACAAAGATCACTGCTTTCTTAGATCCTGATGGATGGAAAACTGTTTTGGTTGACAATCAAGATTTTCTGAAGGAGCTGGAGTAAAGAGTTATGGCTTTTTAATTTAAAGTACTAGTGCTATTGTATGAATAAGTGATCAGCTCCTGTATTTATCAGTGAAGTAGTAGTGTTCAATACGGTTTCTCTGATGTGTTTGCCTGTTTGGTTGAGATTCTAGACAGTCTAC
Gma.5785.1.S1_at	BI943300	At1g64390	0	Cell Structure			CTCAATATTTCAGAGAAGAGTCATCNCTTGTATTTTTCAACAGCTTTGGATGTCTTTTCTGTGTTTGATGTTGTAAGCTTTGCAGCATTTTGTANTCTCTACAGAGAAACAGTTTGTGCTATATAGTATTATGTTTTTGTGCTGTGCAA
Gma.5793.2.S1_x_at	CD393846	At1g06760	2e-13	Cell Structure	Histone		ACCGACTAAGTCTGCTCCTGTTAAAGCCGCTGCTGCTCCCAAGAAGCCCACCAAAGCTGCGGCTAAGCCCGCCGCCAAGCCCGCTTCCAAGCCCAAAGCTGCTGCACCTAAGAAGAAGGCTGTTGCCAAGCCCAAGGCCAAAGCTGCGGCCACCAAGCCCAAGGCCAAGCCCGCTAAGGCCGCGCCGAAGAAGGTCGCCGCTAAGCCTGCGAAGAAGACTCCCGTAAAGGCCGTGAAGAAGCCCAAGAGCGTCGTGAAGAAACCTAAAAGCGTGAAATCTCCAGCGAAAAAGGCCAAGGCTAAGAAGTGAGGGATTGGAGTGGGTTTTAGTTTGGCGTTATAGTGTTTATGTATTTCGGGTTGAATCGTAGTATAGGT
Gma.5833.2.S1_s_at	BE801610	At2g18050	2e-25	Cell Structure	Histone		TGTGCCTTGCTGCACAATCTTGAAGAAAGTTGTGTAGTGTAGGATGGTAGATAGTTTAGT
Gma.5833.3.S1_at	BI469020	At2g18050	5e-26	Cell Structure	Histone		TGAAGGAGAGCACCGCCAAAGCGACGAAGGAATCGCGTCCGAAACGAAACAAAATCGCAACCGCCGTTGCTCCGAAGAAAACCGAGGCGGTTAAAAAGCCCGCGAAGAAGGTCGGGCCGAAGAAAACGAAGAAAGTGTCGACGCCTGCGNNNCCCAAGCAGCCCAGGTCCATTAGGTCTCCGACCAAGAGGGCCCGTAAAGCTGCCGTCGCTGCGGCTTGATGTTTGATGTTTTTCTTGTTTAGTTAAAACTCTGGCATATAATATATGTAGATATGAAAAGGTGTGTGTTANCCTTGTTGCACAATCTTGAATATAGTTGTGTGGTTTAGGATCGTAGATAGTTTAGTGTTCTGCAATGTTCGCTCTAAGAAGTGATCAATTGGAGATGAATTTTACT…
Gma.5989.1.S1_at	CD399531	At2g17390	1e-114	Cell Structure			TAAGAATAAGAACACTGCTCTCCATTATGCAGCTGGTTATGGCAGAAAGGAATGTGTGGCCCTTCTCCTTGAAAATGGTGCTGCAGTTACTCTCCAGAATATGGATGGTAAAACTCCAATNGATGTTGCGAAGCTAAACAATCAAAATGAAGTCCTNAAGCTACTTGAGAAAGATGCTTTTCTGTANTTGNAATGCATGATGCCATGCTGTCACCAACAAG
Gma.5502.1.S1_at	CD417859	At5g44340	0	Cell Structure			GTCCAGCGTGTGTGATATCCCACCTAAGGGTCTTAAAATGGCATCCACTTTTATTGGTAACTCGACNTCAATCCAGGAGATGTTCAGGAGAGTNAGTGAGCAGTTCACGGCNATGTTCAGGCGCAAGGCTTTCTTGCACTGGTACACCGGGGAAGGAATGGANGAAATGGAATTCACCGAGGCNGAGAGTAACATGAACGATCTTGTTGCTGAGTATCAGC
Gma.5443.2.S1_a_at	BM891269	At5g54640	5e-14	Cell Structure	Histone		TCAAAACACTTCAAACATCTCGAACGCTCTCTTTCCG
Gma.5323.1.A1_s_at	CD402653	At5g59970	1e-37	Cell Structure			ACGGATTTGGCGGTTAGACAATTGGGGATTTCNGCACTGCGTCCTCGATTAGNGTTTCTTATAGTGTCAATTTCGATGTTTATATCCTGCAATAGTTCTTTAGCTGTAGCTTGAGGTTTAGCAACTGCTCTTGTTTCGCTTTGGGTTGTAGCTATGAGA
Gma.4424.1.S1_at	BG237912	At1g11840	1e-130	Cell Structure			TGATAAGCCTGAGTACAAGTACACTATAGCTATGCTCGGGTATGGAGAGGAGCACGAGACAACTGTGTTGGAGTTGACATATAACTATGGTGTGACTGAATACTCTAAGGGAAATGCTTATGCACAGATTGCCATTGGTACTGATGATGTATATAAGAGTGCTGAGGTAGTTAACCAAGTCATAAAAGAGGTTGGAGGGAAGATTACTCGGCAACCAGGGCCAATTCCTGGCCTTAATACAAAAACCACTTCGTTTTTAGATCCAGATGGATGGAAAACTGTCTTGGTTGACAACGTTGATTTCTTGGAAGAAC
Gma.4466.1.S1_at	BQ629041	At5g48160	5e-81	Cell Structure			GTCAATCTAATGAGTGCCACCCTTTCAGAACAAACCCATGAGTACTGGTTCAGTGTATGTTATAATCTTTTACATATTATAGCAATGTTATTCTGTTGCACAATTGATGAAGAGTTAGTCTAATTCCATTAGGTTCAAGACAATGTAAGCCTTTTGTAGATCAAAGAGGTACTAGTAAGTAAAGGCTTAACTCAGTTTGAAATTTGGTTTGTTCTATGCGGTAT
Gma.4185.1.S1_at	BQ742395	At4g17030	3e-58	Cell Structure			AAAGGGTTCCATGCACATACACCGGCAATGTCTTGTTCCACATCAAGGAAACTAGCACCAACCCTGGTTACTTTGCTTTGGTCATTCTCAATGTAAATGGAATACACGACGTCACTGCTGTTGAATTGTATCAGATGGGACAATGGAAGTCACTTAACAGGAACTATGGAGCAGTGTTTGACTTTCCTAACCCACCAAGTGGCGAAATCCGGTTAAGGTTTAGGGTGAGTGGCATGTCTGATTGGGTGGACCCCATGATTGTCATACCCAGTAACTGGCAGCCTGGAAATACTTATGCCACCAAGGTTCAGCTTAAATAGAAAGAATCCCAGGAACAGATTACAAATAATAGGCACTAGAGTATATTCAGTTTGTTTCTTATATGGTGTCACTCAATGT…
Gma.4270.1.S1_s_at	CF920385	At3g46010	2e-64	Cell Structure			TTTTGTCACTGAAGAGAATTGCCAAAAGAGCAGAATTTTCTTCATTGCTTGGTCCCCTGATACATCTAGGGTTAGGAGCAAGATGATTTATGCCAGCTCCAAAGATAGATTCAAGAGGGAGCTTGATGGAATTCAGATTGAGCTGCAAGCAACTGATCCTACTGAGATGGGTCTTGATGTGTTCAAAAGCCGTGCCAATTAAATGATTCCGATTATTCATAAATAGGAGTTGTGATGGGGATGGTCAACTTGGCTAATTTGGACTCAATTTTCCAAGTTTTGACATGAGGTCTATNGCAGCTTCAACAAAGCTTCTCTTGTTCCAGTGTATCTTGTGGTTTGNGACATATAACCCGTGTTTGGGTGTNATCTTAGNCCTATTCCTANTAGTTAATTTTG…
Gma.4001.1.S1_at	BI424053	At1g05570	1e-117	Cell Structure			TTGTCATTTTGATTGCTCTTCCGCATATGACAGTGCAGGACATTGTTGTTTGCATTCTTGCTTTCATGCCAACTGGTTGGGGAATGCTGCAGATTGCTCAAGCATTAAAACCTGTAGTACGCCGGGCTGGGTTTTGGGGATCAGTGAAAACTCTTGCTCGAGGTTATGAGATTGTCATGGGTTTGCTATTGTTCACTCCTGTTGCTTTTCTGGCTTGGTTTCCATTTGTTTCAGAATTTCAAACCCGTATGCTGTTCAACCAAGCATTCAGCAGAGGTTTGCAAATTTCTCGTATTCTTGGTGGCCAAAGGAAGGAACGCTCTTCTCGCAACAAAGAATAGGTTGTNTAACTCTGAAGGNTTNNAATTATTAGGAGNCCNAAATTCTTGGTTGCCNTAA…
Gma.3604.1.S1_at	AW349604	At4g34050	1e-102	Cell Structure			TACTTCACCTGCCACATATGGAAAAAACACAACCTTCTACTATTTTACCTAATCCTTAAATAAACATAATGTGTGTCTGCTTGGATAGTTACTCTGTTGTTGAGTTTTA
Gma.3604.4.S1_s_at	BI317410	At4g34050	1e-51	Cell Structure			TCACAAAAGTCTCCTTCAGAGCGATGCACTCTATCAGTATATACTTGAAACCAGTGTGTACCCAAGAGAGCATGAGAGCTTGAAGGAGCTAAGAGAGTTGACGGAAAAACACCCTTGGAACCTGATGGCTACACCACCTGACGAAGGACAACTTCTAGGCATGCTACTTAAGCTTATCAATGCCAAGAACACCATGGAAATAGGCGTCTTCACTGGTTACTCCTTGCTTT
Gma.3716.1.S1_at	BI968899	At5g64030	0	Cell Structure			GGATTCTTAGGCCTGAAGGAAAACTTATTGTTCGNGANACTGTNGAGATCNTTGAAGAGCTTGAGAGCATGGCTAGGTCTATGCANTGGAAGGTTCGCATGACTTACTCCAAGGATAAGGAGGGNTTGTTATGTGTGGAGAAGTCCAAGTGGCGACCTAAGGAGCAGGAAAAGCTCGAGTATGCTATTGCTTAAGCATGGAGATGAGATGCCAAAATTCTTGGNTTTTTTGGCTACTCGAAATTCCTGTTTAACTGTACTTCCACTGAGTCATATGTATCATGTTAGTTAGGAATATCTATGTATTCTTTTTTCCTGTTGGGTATTAATTTTGATATCCTTTATTTATATTTATTAAATTGGTGACCTCTGTTGTAACATGGTGCCATAGCGTGAAGGAA
Gma.2798.1.S1_at	CD417686	At5g59970	5e-35	Cell Structure			CACCGTAAGGTGTTGCGCGATAACATTCAGGGAATCACCAAGCCTGCGATTCGGCGTTTGGCTCGCAGGGGTGGTGTGAAGCGTATCAGTGGTCTCATCTACGAGGAGACACGTGGCGTGCTCAAGATCTTTCTGGAGAACGTGATTCGTGACGCCGTTACCTACACTGAGCACGCTAGGAGAAAGACCGTTACGGCAATGGATGTGGTTTATGCTCTCAAGAGNNCAAGGAAGAACCCTCTACGGATTTGGAGGCTAGTTTNNNNNNNNNNNNNNTTTTTTTNAATTTTTATTGTTAGGTTTCGTTTGTTTTGGAGGTTTATGTGGGATGTAAGAGACCCTTGCTATTAGGGAGATAGGGAAAAAAATTGCAAGGATTTGGTGTAGTAAGTTGCTGGT…
Gma.2801.1.S1_at	BI785739	At3g18080	0	Cell Structure			GGAAACCCAACTGTTATCTTATCTGAAAATGGCATGGATGATCCGGGTAATGTGACTCTTCCCAAGGGTTTGCATGACACCACAAGGATAAACTATTACAAAGGCTATTTGACTCAACTAAAGAANGCAGTTGATGATGGAGCNAATGTGGTTGGNTACTTTGCATGGTCATTGCTGGATAACTTTGAATGGAGGTTGGGTTACACATCAAGGTTTGGCATTGTCTATGTTGATTTCAAAACCCTCAAGAGATACCCCAAGATGTCGGCATACTGGTTCAAGCAACTCATTACCAAAAAG
Gma.3064.1.S1_at	CD403129	At5g65360	1e-70	Cell Structure	Histone		AATCCCGTTGTATTTTTCTCAGATGGCTCGAACGAAGCAAACGGCCCGCAAGTCCACCGGCGGCAAGGCGCCGCGGAAGCAGCTGGCGACTAAGGCGGCTCGCAAGTCGGCTCCGGCGACCGGCGGCGTGAAGAAGCCGCACAGATTCAGGCCGGGAACCGTGGCGCTGCGCGAGATCCGGAAGTATCAGAAGAGCACGGAGCTACTCATCCGGAAGCTTCCGTTCCAGCGCTTGGTCCGCGAGATCGCGCAGGACTTCAAGACCGACCTCCGGTTCCAGAGCTCCGCCGTCTCCGCGCTCCAGGAGGCCGCCGAGGCTTACTTGGTCGGTCTCTTCGAAGACACGAACCTCTGCGCCATTCATGCCAAGCGTGTTACTATCATGCCCAAGGACATTCA…
Gma.2424.2.S1_a_at	BM524046	At3g15580	5e-23	Cell Structure			TATACCTTGGAACAAAGGCTCGGAGAATCGCGGGATATTGTGGCCAAATATCCCGATCGAGTCCCCGTAAGCCTCCTTCTTCATCCTAATCATCTTCTCCTTTTTTCTTTATATATATTTTAAAATATTTGTTTTAATAATTCTCTTTTTAATCTCGCTTTGTGGATGGATCCTTATAGCTCTCTTGATCCTTGCACTCTACTGTTTATAACGAACGATTCGATTCATGTGCCAAATATATAGAACTAGAACCACACGGTAACGGTAAACATGCTTTCCGTAACCCTAAATTGGTCATTTTATGATTCGATTCTTCTTCTTTACCTTCTGCAGGTGATTGTGGAAAGATATGCGAAATGCGATCTGCCTGAGTTGGAGAAGAAAAAATACCTTGTTCCT…
Gma.2464.1.S1_a_at	BG839541	At5g15650	0	Cell Structure			GGAGCATCAGTGGCCAATGGCAAAGCGTGAATCGGTTTTTGGTTAACTGCATAACAGCCACANAACTTGGAANTGGAACTATTTATATACTGTATTTTTTTTCCTTAGTATTTATCTTCAACTTAGCTGTTATTCTCGGCTTAAAATTTGCAGCATTGTTAGCTGTAATTCTGTTTAATAACTTCATCATTTGAGCTTAGAAACAATAAGTACACCCGTAGGGCGTTACTTTCTTTTTATTATTGTTTGATGGGTAGAGATCACATGGCAGCATTTCGTTACATGTGAAATAA
Gma.2464.1.S1_at	BG839541	At5g15650	0	Cell Structure			AATGGCAAAGCGTGAATCGGTTTTTGGTTAACTGCATAACAGCCACANAACTTGGAANTGGAACTATTTATATACTGTATTTTTTTTCCTTAGTATTTATCTTCAACTTAGCTGTTATTCTCGGCTTAAAATTTGCAGCATTGTTAGCTGTAATTCTGTTTAATAACTTCATCATTTGAGCTTAGAAACAATAAGTACACCCGTAGGGCGTTACTTTCTTTTTATTATTGTTTGATGGGTAGAGATCACATGGCAGCATTTCGTTACATGTGAAATAATAGAAAGGTTATTGATGTATGTCTTGT
Gma.2464.1.S1_x_at	BG839541	At5g15650	0	Cell Structure			ATGAGCTTAACCCTGCGGGAGCATCAGTGGCCAATGGCAAAGCGTGAATCGGTTTTTGGTTAACTGCATAACAGCCACANAACTTGGAANTGGAACTATTTATATACTGTATTTTTTTTCCTTAGTATTTATCTTCAACTTAGCTGTTATTCTCGGCTTAAAATTTGCAGCATTGTTAGCTGTAATTCTGTTTAATAACTTCATCATTTGAGCTTAGAAACAATAAGTACACCCGTAGGGCGTTACTTTCTTTTTATTATTGTTTGATGGGTAGAGATCACATGGCAGCATTTCGTTACATGTGAA
Gma.2470.1.S1_s_at	AI442629	At1g09560	3e-63	Cell Structure			AAAGTCTGGCTTTTGGTCCTTTGATTCCCAACTTCACTTGTCACATATCATATTATGAAGCTCACAGGTTTCCTGCAAGCGGTGACTCTTGCTTTGGTGTTAGCCACCGTCTCTGCATCAGATCCTGATCCTCTTCAAGACCTCTGTGTCGCAGACCTTGCTTCAGCGGTTAAAGTGAATGGATTCACATGCAAAGATGCTGCCAAGGTAAATGCGAGTGATTTCTTCTCAGACATACTAGCCAAACCAGGTGCCACAAACAACACCTATGGCTCCCTAGTGACTGGAGCCAACGTTCAGAAAATCCCAGGACTCAACACCCTTGGCGTGTCTTTATCACGCATTGACTATGCCCCAGGTGGCATCAACCCACCTCACACGCACCCACGTGCCACCGAG…
Gma.2623.1.S1_at	CD414993	At1g07790	1e-41	Cell Structure	Histone		TTCACCCCGACATCGGAATCTCAAGCAAGGCCATGGGGATCATGAACAGTTTCATAAACGACATCTTCGAGAAGCTCGCCCAGGAGTCGTCGCGATTGGCTAGGTATAACAAGAAGCCTACCATTACTTCCAGGGAGATCCAAACGGCGGTGCGTTTGGTCCTCCCTGGGGAGTTGGCCAAACACGCTGTCTCTGAAGGTACCAAGGCCGTCACCAAGTTCACCAGCTCTTGATTNGTTTTGTTTCCTGTGTTTCGATTAGGGTTTTCTGTTGACCCCGATTTGATTCGCATTTTTAAATTAGGGTTTTATTTTCCTTTTTGTTGCTTTTGAGGGTGTAGAT
Gma.1975.1.S1_a_at	CD418592	At1g07790	2e-46	Cell Structure	Histone		CACCCTGACATTGGTATCTCAAGCAAGGCCATGGGAATCATGAACAGCTTCATCAACGACATCTTCGAGAAGCTTGCCCAGGAATCTTCTAGACTTGCCCG
Gma.1975.1.S1_s_at	CD418592	At1g07790	2e-46	Cell Structure	Histone		CACTAGCTCTTGAACTGACTATTATGCCCCTTCGCTTCGATCTAGGTGTCTCTGTTAGGAATATGTTTTATGTTGAAGTGTTGGTTTATTTTTTCTTTTTGGTGAAAGCAATTTGTAAGTGAAGAATATGGGATTTGTTGATCCTTCTTTGTATGGAATTAGTTGCTAATACAGAGACG
Gma.1975.3.S1_at	CD393546	At1g07790	2e-46	Cell Structure	Histone		TCACTAGCTCTTGAATTAGCTATCTTATCGCTTTCCAAAGACTCTTTTCTGTCCCAATTTGAGATTTTAATCAGTAGTAGACTTTTTTTTTTNGTTTGATAGGATTTGTAATTGAAAGAATGGTCCTGGGTTGATCCTTTTGTGTATTGAAGTGGCAAGATGTATNNNATTATATAGGAACGCAGTATTGTTTAGTATTATACTTTCAAGAATCTCCAATCGGCCATTCGTTAATAATTGTTTTTTCGGATATTTGTTTGCTTGAACTTTCCAGNNANNNANNAATAGTGTGCAAATCTTTTGAAAACTGTNNACNTTTATCGTATAGGAATCATTTTCCCTAA
Gma.1975.4.S1_at	CD403154	At1g07790	1e-46	Cell Structure	Histone		GAACAAAATATCTTTGCCTGGCTCTTGTTTTTCTTCATGTGTTTCTGTTAGATCTAGCGACCTATGCTTAGATTTGAACAGTTAACTT
Gma.1975.4.S1_x_at	CD403154	At1g07790	1e-46	Cell Structure	Histone		ATCGTGATGGCACCAAAGGCAGAGAAGAAGCCAGCAGAGAAGAAGCCCGCGGAGGAGAAGAAATCGACGGTGGGAGACAAGGCTCCGGCGGAGAAGAAGCCAAAGGCCGGAAAGAAGCTTCCGAAGGAGGGAGGCGCCGGCGGAGAAGGGAAGAAGAAGAAGAGAAACAAGAAGAGCGTGGAGACATACAAGATCTACATCTTCAAGGTTCTGAAGCAGGTTCACCCTGACATTGGTATCTCAAGCAAGGCCATGGGAATCATGAACAGCTTCATCAACGACATCTTCGAGAAGCTTGCCCAGGAATCTTCTAGACTTGCCCGCTACAACAAGAAACCCACCATCACTTCNAGGGAAATTCAGACCGCGGTCAGGCTTGTGCTGCCCGGTGAATTGGCC…
Gma.2190.1.S1_x_at	CD390492	At3g02230	0	Cell Structure			GGGAGTGAAGACTGGCCTTCCATACATCTGGCACAGCAAAGCAAGCAACCCTTTTGTCAATCTCAAAAAGGAGTACAAGGGCATCTTCTGGCAAGAAGAAATCATTCCATTCTTCCAAAGTGCCACTCTTTCAAAAGAGTGCACGTCTGTCCAAAAATGTTACATTGAACTCTCCAAGCAAGTCAAGGAGAAGCTTGGGGCTGTTGATCCCTACTTCATCAAGCTAGCAGATGCCATGGTTACTTGGATTGAAGCTTGGGATGAGCTTAACAACAACACATCTGAAGAAGTTCCTTCAAAGCCAACCAATGGTGCTGCTG
Gma.2240.1.S1_at	AW311147	At5g13870	1e-142	Cell Structure			TCACATCGACGGGTGCGAGGCTTCGGTGAACGCCAAGTTCTGCGACACGCAGGGCAAGAGGTGGTGGGACCAGCCTGAGTTCCGTGACCTTGACGCCGCCCAGTGGCGTAGGCTCAGATGGGTGCGCCAGAAATACACCATCTACAACTACTGCACTGACACTAAACGCTATCCTCATATCTCTCCTCCTGAGTGCAAAAGAGACCGTGACATTTAAATTTCGAGTGAATAGATATTTTAGTCCGTGATATTTAAATTTCTCATTCACTTTATTATTGTTGCTTCTCTTTTCATTTTTATCACCCTGCCACACATTCACATTTCCACTTCCTATGTACAA
Gma.2262.1.S1_at	BE821923	At3g14310	4e-96	Cell Structure			AACACTGGGCCTGGTGCTGGTACTTCTAATAGGGTCACTTGGAAAGGGTATAAGGTCATCACTGATNCTGCNGAGGCCAGGGANTATACTCCTGGAAGCTTCATTGGGGGCTCTAGCTGGTTGGGCTCAACTGGGTTTCCTTTCTCTCTTGGTTTGTAAATTATGTGAAACTTTTGAGTCTTGTAATTGTTACCTATTGTTATTGTTATGTGGCAGAGAGAAACAAATTAAGTTGGCCCAAATGTTTAGAAGAAAACAAAAAAAGGAAAGAGGGAGAGAGAGAGAGATTATTGCTGGAGAGGTGGGTGGGGGGTTTTAGTTTATCTTTCACTTGTATTGGTTGGGTTTTGGAACACACCATGTTCTTCTACCTTAGGCTATTTATTGTGATAGTGCCAT…
Gma.2245.1.S1_at	CD391149	At3g55430	1e-144	Cell Structure			AGGCAGATGCTAGCAACCAAGCTTTGCAAGCAAACATAAACTATGTGTGCAGCCAAGGAGTTGATTGTAGGCCAATTCAACCAGGAGGAGATTGCTTTGCAGCCAACAACGTTAAGGCTCTTGCCACTTATGCCATGAATGCCTACTACCAGGCCAATGGGCGCCATGATTTCAACTGTGACTTCTCTCAAACTGGTGTTATTACTACTACTAATCCAAGCCATGATAAATGCAAAATCTGAGCATGTTTATTTAAAGGTTATAATCAGAGGCAAGAAAGGAAGATAGAGAAAAGCCCATTGTCATGGTGTCAATGTGGCTTAGTGGTATCTGTGACTCTGAGATTATGCATTCATGTACTCAAAATTATTTAGTTTGTATATTGTTCTGGAAGAAGAA…
Gma.2338.1.S1_s_at	CD409383	At5g10980	3e-71	Cell Structure	Histone		GTTAGAATGCTTCTGTTTTAGTTTTTACCTGCGGGATGTTGCAGCCACTTTAGAAACTGTATTGGACAAC
Gma.2338.3.S1_at	BI426604	At5g10980	5e-66	Cell Structure	Histone		GATTCGCGGTGAACGTGCTTGAGGTGGTGGTTGTGAAGATGAAGATGAAGATGGGTTGCTGCGGGTGGTGTTTTTGTTGTTCAGATTCCTTTTTTTTTTTTTTTNNCAATGGATAGGGTTGTTAGGGAGTGTAGGTGTTTTACGGTATTACCCATTAATTGTGATACAGGCAAATACTGCCAAGTGTCCGTGACTGTGTTTTCTTCCTTTTAGAAAATTGGCTTGTAATTGATTTTTGGACATGTGTGTCATAATGTTTCTGTTTTTAGTTTTTACCTACGGGATGTAGTCACTTTGGAATTGTATTGGACAACATTCAGTTGCCATCTAATCTCGTTTAAGCTAAGTTTGTTGTGCTAATTAA
Gma.15648.1.S1_s_at	CD404676	At5g54640	4e-42	Cell Structure	Histone		TGTCCTCGAATATCTCGCAGCCGAGGTTTTGGAGTTGGCTGGAAACGCTGCGAGAGACAATAAGAAGACTCGAATTGTGCCGCGCCACATTCAATTGGCGGTGAGGAACGACGAAGAATTGAGCAAGCTTCTTGGTGACGTCACCATCGCTAACGGTGGCGTTATGCCCAACATTCACAATCTTCTCCTTCCCAAGAAGGCCGGTGGCTCATCCAAGGGCGCTGCTGCTGACGATGACTCTTAAATAGGGATTCGCTTTTCTTGATTTTTTTATTATCAAATTTAGATTATCTTTTGGCCTCTCTGT
Gma.15752.1.S1_at	BE610171	At5g59970	1e-37	Cell Structure			TGCTAGGAGGAAGACTGTTACCGCTATGGATGTTGTTTATGCTCTCAAGAGGCAGGGCAGGACTCTCTATGGTTTCGGTGGTTAAATTTTAGGGTTTTGATGGGCTTAGCAGCTGGTTATTTTTGTAAATGGTCGTTTGTTTGGGAGTATTTGATTTTGTGCTTTTTTGTTTTTTAGCCTTTCTTGTTAGGTGTATTGTTATTTTTGCTTCAATTGAAATGGAACAAAGAGTGTTTTGTTTCTGGAATTCTCTTCTTGTTGAAGGTGTACACTGATTACCCGCTAGTTAATTGCGACTTTGGAGATAAANNNNNNNNNNNNNNNNNNNNNNNNNNNNNNNNNNNNNNNNNNNNNNNNNNNNNNNNTTTGCAGCTTTTGTGATCGTTATTGCGTCTGTTC…
Gma.15760.1.S1_at	BE823195	At5g65360	1e-70	Cell Structure	Histone		GGGCTCTTTGAGGATACCAACCTCTGCGCTATTCATGCTAAGAGGGTTACCATTATGCCCAAGGACATTCAGCTAGCTCGTAGGATTAGGGGCGAGAGAGCTTAGGGTTTATGATTTACAAAGCCGTAGTGTTTTCTAAGGGTTATTATTTTGCAATCGATTCCTTCAGCTTAGTATTAGGGTGAAAGTCCTTGTTTTATTGTGACTGTATTGGAAACTCGTTTCTGTAATGTGAGAAATATTAATGTTGAGCCCT
Gma.15878.1.S1_at	CD393373	At2g30620	5e-15	Cell Structure	Histone		AACAAAGGCTGTTCCTGCCAAGCCCGCGGCAAAGCCCAAAGCCAAGCCCGTCAAGGCTTCAAGGACGTCGACGAGGACTTCACCAGGGAAGAAAGCAGCTCCTGCTGCTAAGCCCGCGGCGAAGAAAGTTGCGGTGGCAGCGAAGAAAACGCCAGTGAAGAGTGTGAAACCGAAGAGTGTAAAGTCTCCGGCCAAAAAGGCTACGGCCAAGAGAGGGGGTAGGAAGTGAGAAAGAGTGGTCGGTGGGGTAGGGTTGTTTTGGGGTTGGTGTTGTGAAGTTCTTTGTCCTCTTGGTGTAGTTGGGGGTTACAGATGATGTTCCTATAACAGATGAAATCTGATTTTATGAAACCTTTGTTATTTCCCTTTTTAGTTTTGATTTTTTTTTGGTTCGACCTA…
Gma.15979.1.A1_at	CD414564	At4g23500	1e-14	Cell Structure			AAGAAGCAGCCTTGGACCTGCACTGATATTGAAGGGATGACGAGTGGGGTGACCCCTCCACCTTGTGGTCTGTTACCTGATCAAGGGCCGGAGAAGATCACNNNNNNNGATTTCCCAGCAGATAATCTACCTATTGACATAGTGGAGCTTAAGAAATGTACTACCACCATGACATATGTTGAAGTGTAGTAGTTTATGCAAGTTATTGTTTTAGGAATAGTCCTTCTCAGATTATCAAAAAAACATTTCTCAAGTTAAGAAATGAATGGTGTTTCAAATTATAGANATGGAACGGTTGTCTTTTCTTCTCTCGTTTANNNAANNNNNNNNNNNNNTGCTGCTACAAGTTTCATAGCTAAT
Gma.16587.1.S1_x_at	AI736119	At5g49720	0	Cell Structure			CCATGATGTTCGTACAAACTACAATTACACAGAGCCAACNCTTGCTGGAAATGCNGGTTTAGTTGCNGCACTAGTGGCATTGTCAGGCGACAAANGCACATCNATTGACAAAAATACCATTTTCTCTGCTGTTCCCCCAATGTTTCCTACACCGCCACCACCNCCAGCNCCATGGAAACCATAAGCNCATCNTGCCATTGGTTATTTCTTTCTAGCAAGTANCCCAGATGATNTGAGTGCACCGNTAACCTTCGTTGTTTTGTATCAACTNNAAGATCANGGTAATTTTGNAGAAAAAAANGCTTNGNGANNNNGAAGNNNTGGAGCTTGGCCNACTGAATATAGCTGCCTGGGGCCAATGATCGACTCAAGATTNAGCATTAAGAATTGATAAAGTGG…
Gma.16587.2.S1_a_at	BI497998	At5g49720	1e-43	Cell Structure			GGAAATGGAGGGACACTTCTAAGCCAAACCCAAATACAATTGTTGGTGCCATGGTTGCTGGTCCTGACAAGCATGATGGCTTCCATGATGTTCGTACAAACTACAATTACACAGAGCCAAC
Gma.17619.1.S1_at	CD405083	At5g54640	3e-42	Cell Structure	Histone		CCGTCGGTCGTATCGCCAGGTTCCTCAAGGCCGGAAAGTACGCCGAGCGCGTCGGCGCCGGAGCCCCCGTCTACCTCGCCGCCGTTCTCGAATATCTCGCTGCTGAGGTTTTGGAATTGGCTGGAAACGCTGCGAGAGATAACAAGAAGACTCGAATTGTTCCACGCCACATCCAATTGGCGGTGAGGAACGACGAAGAGTTGAGCAAGCTTCTAGGAGATGTTACCATTGCTAACGGCGGTGTTATGCCTAACATTCACAACCTTCTTCTTCCCAAGAAGGCTGGGGGCTCATCCAAGGGTGCNGCTGCTGACGATGACTCTTAAATAGGGATTCACTGTTCACAAAGTTCTTGAATTTAGATTCTATGTTTGCTCTNCTTTTTTTTTTCCTTTTTAT…
Gma.17625.1.S1_a_at	BI971077	At4g14960	1e-60	Cell Structure			GTGCCTAAAGATGTTAATGCAGCTGTTGGAATTATCAAGACCAAGCGCACTATTCAATTTGTTGACTGGGCCCCACCGGGTTCAAGTGTGGAATCAATTACCAGCCTCCGACTGTTGTTCCAGGTGGTGATCTTGCCAAGGTTCAGAGGGCCGTGTGCATGATCTCCAATTCCACCAGTGTTGTTGAGGTCTTCTCTCGCATCGACCACAAATTTGACCTCATGTAT
Gma.17692.1.S1_at	CD393918	At1g52740	9e-57	Cell Structure	Histone		GATTACTGGTGAATGATAGCAGCTTGATGGAAAATTTCTCTACTAATTGTGTATTTGTTGCATGACACTTGAAAAACACAGTAGGGCCTTCTTCTATTTATGACTGAGTTGCTGCTGTTGATCATGGATATAATATTTAGTGTTTCTCTTTGTTAATTTAGTATGTCNNNTATCACTGAAAATCTTAATTGAGGATAATTCAATCTGATGGCATTGTATTCA
Gma.17861.1.S1_at	AW310110	At1g09560	3e-84	Cell Structure			ACACAGTCCATTGCTCTAACGTTGTTTGCAGCGACGCCACCGGTTCCAGACAATGTGTTAACCAAGGCGTTCCAGGTGGGTACCAAGGAGGTTGAGAAAATTAAGTCTAGGCTTGCTCCTAAGAAATAATTAATACTAATGTGGGATGTGGTTGTAATGTCTCTCTCATTGTTCTTACTTCTTACACCTTCCTCTCTTGTCCTTGTTCTTGTTGCTTTACAATTCATGTTTGTTGGGAACTCATAAATTCAAAGATTTGGAATGAGAGTANAAAANNNANNANANNCATTTCTTTGATGATTGGAATTTGAAATTAGATGCTTGCTTCCTTGCATGCTTCTTCGTTTTGTTAATTAAATGCGCTATTAGTGGTTCTGTCCTGTGTTGACTTCTTAA
Gma.17868.1.S1_at	BM270176	At5g62700	0	Cell Structure			GAACGATCTCGTGTCGGAGTATCAGCAGTACCAGGATGCCACTGCTGATGAGGATGAGTATGAAGAGGAAGAGGAGGAGGAGGAGTTTGCCCAACATGATATGTGAATTTGAACTTGGGTGTGGTGTANNGNGGTGGCTTTAGACAAGAAGATGGATAACAAGCTGCAACTTCCTGTTGCCGGTTGATGATTGTCTCTTTTGAGGGGATGGTTTTGTTCCGGCTAGATCTAGTTTCTATTACTGTTCTATAAAACTGATTCTGGTTTGTTTCCGTTTTTATGTATAACCTGTTGGTAGGGAAGAC
Gma.17868.2.A1_s_at	BQ253153	At5g62700	3e-36	Cell Structure			AACGATCTTGTGTCAGAGTATCAACAGTACCAGGATGCCACTGCTGATGAGGATGAGTATGAGGAGGAAGAGGAGGAGGAGGAGTATGGCCAACATGATATGTGATTTTGAACTTGGTAATGTATTGCGGTGGCTTGAAGATGTATAACATGCCGCAACTTCCTGTTGCCGGTTGATTGTCTCTTTTGAGGGGATGGTTCTGTTCCGGCTAGATCTAGTTTCCATTACTGTTCTATAAAACTGGTTCTGTTTGTTTCCGTTTTTATGTAACCTGTTGTTTGTAGGGAAGA
Gma.17926.1.S1_a_at	CD401821	At3g62830	0	Cell Structure			GACCCTGATGCTAGGATAGAGTACAGGCCCAACACAGAGGATGACCCGCACAAGAGAAAGCCTGATATAAGTAGGGCTAAGGATCAACTTGGCTGGGAACCCAAGGTTGACCTGCGCAAGGGCCTCCCACTAATGGTTTCTGACTTCCGGCAACGCATTTTTGGTGACCAGAAGGAAAAGGCATCCGTAGCCTAATTCTAGCATGTCATGTATCTTAGAGCCAGAAAGAGAAAAAATAATAGTTCGAGGATAACCCTGGCCCG
Gma.1913.1.S1_at	BI970928	At3g12110	0	Cell Structure			GAGGAACAACCATGTTCCCTGGTATTGCTGACAGAATGAGCAAGGAAATTTCNGCATTGGCACCCAGCAGCATGAAGATCAAGGTTGTAGCACCACCTGAGAGAAAATACAGTGTCTGGATCGGTGGTTCTATCTTGGCATCTCTTAGCACCTTCCAGCAGATGTGGATTGCAAAGGCAGAATATGACGAATCTGGTCCATCAATTGTGCACAGAAAGTGCTTCTAAACTGTTTCGATAGATAGGGTTATTGAAGGGAAAGACTACTATCATCACGATTTGTCTGGAAGCAATGCATTGCAGATTGTAACCCTTTGATTCTAGCTTTTGTTATCCTTTCATTTTATTCTCTTGTTGGAGTGATCATTTATTTGCAGAAGGTG
Gma.14873.1.S1_at	CD487575	At5g59970	2e-40	Cell Structure			ATTCAGGGCATAACGAAGCCCGCAATTCGCCGTCTCGCGAGACGTGGCGGCGTGAAGCGTATCAGTGGTCTCATCTACGAAGAAACCCGCGGTGTTCTCAAGATCTTCCTCGAGAACGTCATTCGCGACGCTGTCACCTACACTGAGCACGCTCGCCGCAAGACCGTCACTGCCATGGACGTTGTTTACGCCCTCAAGAGGCAGGGCAGGACCCTCTACGGTTTCGGCGGTTAGAGAATTACCGATTTCTGCATTGCGTCGTGGATTAGGGTTTCTTATAGTGTCAGTCAATTTCGCTGTTGATATTATGCAACGGTTCTTTAGCTGTAGCTTGAGATTTAACGATTGTTCTTTGAGTCGTAGTTATG
Gma.1541.1.S1_at	BE657337	At2g31200	4e-40	Cell Structure			CCTTGCCTGAAAATGATTGCCGATANGCTNTCTTTGACTTTGATTTTGTGACATCTGAGAACTGCCAAAAGAGCAAAATCTTTTTTATTGCATGGTCTCCTTCNNGTNGCCCNGCATTNCGCCCNNNAAGATGCTATATGCAACATCCAAGGACAGGTTCAGAAGGGAGCTGCAGGGCATCCATTATGAGATTCAGGCAACAGACCCAACNGAGATGGATCTTGAAGTCCTCAGAGANCGTGCAAACTGAGCANNNNCCTACACAAGAGGNTTGTGTCTAGGTGATGTAGTTANNATATCTGAGGCCTCAGGGAATGATGTTGACTGATNNNACCCTTTAGTTNTTCTACTATGATCNCTGTCTGTTTCGNNACNTATTTCTCNTAAATNAGCTGACTT…
Gma.13580.1.S1_s_at	BQ611050	At5g19780	0	Cell Structure			CAATGTAATTGTTTCGAGTAAAAAGGGTATATGCTTCGTTACATTACCCTGAACCAGTATTGTTCGTTCCTTTTTGTTTTTACTCCTGTGTGATATAGTTCTCCATTATTCAAACTGTGAAGTGATATCATCATTATGCTTCTATTTTGGTGGTTTAGGACCTGTTGTTTGCGACCTCTGTCATGTTTTCAGAATTGTCCAT
Gma.13580.2.S1_a_at	AW780839	At5g19780	0	Cell Structure			AGGACTGTTCAGTTTGTTGATTGGTGTCCAACTGGATTCAAGTGTGGTATCAACTACCAGCCACCTTCTGTTGTTCCTGGTGGTGACCTTGCTAAGGTTCAGCGTGCTGTATGCATGATCAGCAACAACACCGCAGTTGCTGAGGTGTTCTCTCGCATTGACCA
Gma.13580.2.S1_x_at	AW780839	At5g19780	0	Cell Structure			AGGACTGTTCAGTTTGTTGATTGGTGTCCAACTGGATTCAAGTGTGGTATCAACTACCAGCCACCTTCTGTTGTTCCTGGTGGTGACCTTGCTAAGGTTCAGCGTGCTGTATGCATGATCAGCAACAACACCGCAGTTGCTGAGGTGTTCTCTCGCATTGACCACAAGTTTGATCTGATGTATGCCAAGAGGGCTTTTGTTCACTGGTATGTTGGTGAGGGTATGGAAGAAGGGGAGTTTTCTGAGGCTCGTGAGGACCTTGCTGCTCTTGAGAAGGACTATGAGGAGGTTGGAGCTGAAGGAGCGGAAGATGATGAGGAAGGAGAGGACTATTGATAATCGAAGGCTTTTTTTTGTTATCAATGTAATTGTTTCCGAGTTAAAAGGGTATATGCT
Gma.13293.1.S1_at	CD392693	At1g68725	0.008	Cell Structure			GCTCCCTCTGGCAAAGAAGGTGCGTTCTCCATTTGGTATGCTTGGATGAGAGCTGCAGGGCTGTGCGTGGGGTTCACGGTGGGGTCGGTCGCGCCGGGACGAGTTAGGACCTCGTTTGGAGTTGCGTTTTGCACTGCCATTGCTGGAATTGTGGTACTGCTTTTCGGGAACATCAGTGATGTTGGTGGTGCTGTTGCTGCGGGGCACGTTAGAGATGAATGCGAGAGAAGTTCGGCTGTGCTGCCTGGCTTGGATTCTAAGGAATCTGCACGCGTTTGAATAATGGAAACTGGAAAATGAAGAAGATTATTATTGTTGTTGTCTTGTGGGTCATATGATTCTTTGCAAAATGATGTTAATGCATGCAAGAGTAGTATTATAAGGTTTCTTTTTATGATT…
Gma.13325.1.S1_at	CD410143	At1g50010	0	Cell Structure			CAAGGATGTGAATGCTGCTGTGGCCACCATCAAGACCAAGAGAACCATCCAGTTTGTGGATTGGTGCCCCACTGGGTTCAAGTGTGGTATAAACTATCAGCCTCCTACTGTTGTTCCTGGAGGTGACCTTGCCAAGGTGCAGAGGGCTGTGTGCATGATTTCGAACTCCACTAGTGTGGCTGAAGTGTTCTCCAGGATTGATCATAAGTTTGACCTCATGTATGCGAAGAGGGCCTTCGTGCACTGGTATGTGGGTGAAGGTATGGAAGAGGGTGAGTTCTCAGAGGCTCGTGAGGACCTTGCTGCTCTTGAGAAGGATTATGAGGAGGTTGGTGCCGAGTCTGGTGATGGAGATGATGATGGTGAAGGAGATGATGATTATTAGAGTGTCTGAAATAT…
Gma.11334.1.S1_a_at	BI967327	At4g34050	2e-41	Cell Structure			CCCAGGATCGAGATTTGCATGCTCCCGGTTGGTGATGGAATCACTAT
Gma.1181.1.S1_s_at	BE657911	At3g12110	0	Cell Structure			GAAAATCAAGGTGGTTGCACCTCCTGAGAGAAAGTACAGTGTCTGGATTGGTGGNTCTATCTTGGCATCACTTAGCACCTTCCAACAGATGTGGATCTCNAAGGGNGAATATGATGAATCTGGGCCAGCNATCGTTCATCGGAAGTGCTTCTAANGTTGGGTCAAGNNNAGCTGGATGGTGATCAAGTTCTTCATGCACCCAGTCCTGTGCCATATTTCAGTNAAGTTTGGTTGACTTATTTGNTATTTGAAGCTTTGGGTTTTTAATAGATATATCTAGTTTAATGAATGGATTTGTAAGTTGAGTATGTTATAAGTTTCTCCGTTAGGTCNCCTTGGAAGCCAGACTTTTTNATGCAATTGGCGGATGGTATTGGAACTTTGTA
Gma.12446.1.A1_at	CD411372	At5g59970	9e-37	Cell Structure			TCGCAGAGGTGGTGTTAAGAGAATCAGTGGTCTCATCTACGAGGAGACACGTGGCGTCCTCAAGATNTTCCTCGAGAACGTTATTCGCGACGCTGTTACCTACACCGAGCACGCTAGAAGAAAGACCGTTACCGCTATGGATGTTGTTTATGCTCTCAAGAGGCAGGGCAGGACTCTCTACGGTTTCGGTGGTTAATTTCTAGGGTTTCCATCGGCGTAGCAGCTGCTTATTGGTTATTGTTGTAAATGGTTGCTTTTTAGGCTTCTTGTTATATTTGCTTCAATTGTAATGGAACNNAAGAGTATTTTGTTTCTGGTATTTGAATCTTAATGGTTGAAGTTCTCTTAATTGTCATGGTTACTCTGATTATCTGCTAGTTAATTGCG
Gma.1277.3.A1_s_at	AW394783	At5g59370	4e-22	Cell Structure			CTAACTTTTGTTACTCATTCACGTTATTCTCTGGAGTGGTGATTTGGA
Gma.12995.1.S1_at	BU763539	At5g59970	5e-37	Cell Structure			GCGACAATATCCAGGGAATCACGAAGCCCGCGATTCGGAGACTGGCGAGAAGAGGTGGCGTGAAGAGAATCAGTGGTTTGATCTACGAAGAGACCAGGGGCGTGCTCAAGATCTTTCTCGAGAACGTGATTCGCGATGCCGTGACGTACACGGAGCACGCTAGGAGNAAGACAGTGACGGCCATGGATGTCGTTTACGCTCTCAAGAGGCAGGGAAGGACTCTCTATGGTTTCGGAGGCTGAGGGTTTGGCCTTCTTTGGTGGCTTTGGTTTGTGTAAATGGAAGGAATTTGTGTTTTGTAGTGATTATATATGTACTTGGATTATCTTCTGCTCGGTACATGCTCAAGGTTCTTCTGTTTTTTTTTTTTNAATTCTACTAGTAATTGCATCCTAATTG…
Gma.13110.1.S1_at	CD394837	At1g69530	2e-44	Cell Structure			ATCTTGTTGTCACACGCATACCAGTAGTGCTATATAGTATAATAGATATATAGTATTATGTTCTAGGAGTATTATTATTTTTATGACTGGTTAGTGTACTAGGGTATTAGATAGTATGCTACTAGGTGAAGGGTAAGTTTTTTTGGTGATTTTAGAGGCCAGGGAATTAAGATCTAAGAAGGGGCATGTTTTAAATTGCTCCTTCATTTTAATTTTAATTTCTCGTGTCAACAAGTGGGGACCTAATTTTTTAGGCCCCTCTTGATTACTGGGGTGGATTACTCTTTTCACTTTTTCTAAANGNTTTNTTTTTTTAACCTTCTTGTGGAGAGAAGAAGCTAGTGGCAGTGGACTTTTTAATTAGTTTTTACTATGGGTGAGCTACTAAATTGGAAGAGG…
Gma.10775.2.S1_s_at	AI759701	At1g26770	6e-41	Cell Structure			AGCTGGTGATGTGAATTCAGTGTCCATCAAAGGGTCCAAAACTGGGTGGCAACCCATGTCAAGGAATTGGGGGCAAAATTGGCAGAGCAACTCATACCTCAATGGACAATCCCTCTCTTTTCAAGTCACCACCAGTGATGGTAGAACTGTGACAAGCTTCAACGTGGCACCAGCCAATTGGCAATTTGGCCAGACCTTCCAAGGAGGCCAATACTAGAGACATTATTGCAAATTTACAATGGGGGGTANAAAATAGTGCAACAAAAAAAAANNTGTTTGTATACCTATTATTAATCACCTCATTGGAAGAACCATTAAAAGTGTCATTAATAGGTATTGATTCTTGTAACTGTGATTCTGAAAGGCCAGTGTTTTTTATTT
Gma.1034.4.S1_s_at	BG155028	At4g34050	2e-98	Cell Structure			GAAAGAGATACGCAAGATGACTGCAAAACACCCACTGAACATCATGGCAACACCAGCAGACGAAGGACAACTTCTGAGCATGCTTGTTAAGCTCACGAATTCAAAGAACGCCTTGGAAATTGGTGTATTCACTGGTTACTCTCTGCTCTCCACTGCCCTGGCTCTTCCCCCTGATGGAAAGATCTTGGCTTTGGATGTGAATCGCGAATACTATGAGTTAGGATTGCCAATAATTCAAAAAGCTGGAGTGGCTCACAAGATTGATTTCAGAGAAGGACCTGCTCTTCCGTTTCTTGACGAGATGCTTAAAGATGAAAATAAAAAGGGGTCGTTGGATTTCGTTTTCGTGGATGCTG
Gma.10687.1.S1_at	CD415391	At1g54690	2e-50	Cell Structure	Histone		TCCAAATCCGTTTCAAGATCGCAGAAAGCTGGTCTCCAATTCCCCGTTGGAAGAATCGCTCGATTCCTTAAGGCTGGGAAATACGCCGAGCGTGTTGGTGCTGGTGCTCCTGTGTACCTCTCTGCAGTGCTCGAATATCTCGCTGCTGAGGTTTTGGAATTGGCTGGGAATGCTGCTAGGGATAACAAGAAGAATCGTATTGTTCCTAGGCACATTCAGCTTGCTGTGAGGAACGATGAGGAACTGAGCAAGCTTTTGGGGTCTGTTACCATTGCCAACGGAGGTGTCTTGCCGAACATTCACCAGACTCTGCTTCCCAAGAAGGCTGGAAAGGGGAAGGGCGAAATTGGATCTGCCTCTCAAGAGTTTTAGGGTTTTTGTTTTACCCATTTGGACTAT…
Gma.10707.1.S1_x_at	BI967315	At5g02560	1e-40	Cell Structure	Histone		GAAGCCGGTTTCAAGGTCCGTCAAGGCCGGTCTCCAATTCCCCGTCGGAAGAATTGGCCGTTATTTGAAGAAAGGAAGGTACGCCCAGCGTGTCGGTACCGGTGCTCCCGTTTACTTGGCCGCAGTTCTCGAGTACCTAGCTGCTGAGGTGCTTGAGTTGGCTGGGAATGCTGCACGTGACAACAAGAAGAACAGGATTATTCCGAGACATGTGCTNTTGGCTGTNAGGAACGATGAGGAGTTGGGGAAATTGCTTGCTGGTGTCACCATTGCNCATGGTGGTGTNCTTCCAAACATTAACCCTGTTTTGNTNCCTAAGAAGACNNAGAGGGCTGCCAAGGAGCCTAAGTCTCCATCCAAGGCTACTAAATCTCCTAAGAAGGCCTAGATTATCCTTTT…
Gma.10707.3.A1_a_at	AW350624	At5g02560	9e-21	Cell Structure	Histone		CGTATACTTGGCTGCAGTTCTCGAATACCTAGCTGCCGAGGTGCTTGAGTTGGCTGGGAATGCAGCACGTGACAACAAGAAGAACAGGATTATTCCAAGACACGTGCTTTTGGCAGTGAGGAACGATGAGGAGTTGGGGAAATTGCTTGCTGGAGTGACAATTGCACATGGTGGCGTGCTTCC
Gma.10707.4.S1_at	AW309587	At5g02560	2e-42	Cell Structure	Histone		TAAATCTCCTAAAAAGTCTTAACTGACTTAGTTTATTGTTTCTCTATTTAGTGTGCACAAAATGTAAATCTGTGTTTAGGTTCCTTCTTGTATCACCATTATTTGTAGTTCTCAAGTCGCTGTTTCTTTTTCACATTTTCATTCAATCTGTTGAGACAGCAAGCTCTCAGTAATGGATTGATTT
Gma.10707.5.S1_x_at	CD398411	At5g02560	1e-40	Cell Structure	Histone		CAGCGTGTCGGTACCGGTGCTCCCGTATACTTGGCTGCAGTTCTCGAATACCTAGCTGCCGAGGTGCTTGAGTTGGCTGGGAATGCCGCACGTGACAACAAGAAGAACAGGATTATTCCAAGACACGTGCTTTTGGCAGTGAGGAACGATGANGAGTTGGGGAAATTGCTTGCTGGAGTGACAATTGCACATGGTGGCGTGCTTCCAAACATNAACCCTGTTTTGTTGCCTAAGAAGACNGAGAGGGCTTCCAAGGAACCTAAATCTCCATCCAAGGCTACCNAATCTCCTAAGAAAGCTTAAGTGTTTTTATTTTATTTTATTTGAATATGTAAATCAGTCTTTAGATGCTTTTTATGTGAAAGAAAAAATTATCTATTGCNAACACTGTAATTCCTA…
Gma.10738.1.S1_at	BG653978	At5g09810	8e-86	Cell Structure			AAGAAATCACTGCACTTGCTCCTAGCAGCATGAAGATTAAGGTTGTGGCTCCACCAGAGAGAAAGTATAGTGTTTGGATTGGAGGATCAATCCTTGCATCCCTCAGCACCTTCCAGCAGATGTGGATATCGAAGGGTGAATATGATGAGTCTGGTCCATCCATTGTCCACAGGAAGTGCTTCTAAGTCCAAAAGAAATGCTTTAATGGTGAGTTATGTTTTTGCTATGGCTTTTTTGGTGTCTGTGTCATGTCGTGCGAACTATGTTGTCATGGATAA
Gma.10997.1.S1_at	CD396418	At1g18650	5e-37	Cell Structure			GTCACGGTGGCATTGGACTTGTACACAGCAGTAGTTTCTTCTCGATNGCGCTCTTCTCTGCCTTCATGATGATGCTCTGCTGGGGTTGAGAATGAAAATAAATGGGGCTTGGCCTGGGTATATGGTGCAAAATGCCGTATGTCACTGTATTAATGTGAATGTTATTTTCTAGGTGCTGAACTTGGGACGTTAGTTTTTGGGGTTCTTATAATNTTTTTCTCCACCTTCCACTAGCTATTGGGTTTTTGATTAAT
Gma.11070.1.A1_at	CD412352	At5g59970	1e-40	Cell Structure			GAAAGTTCTTCGCGATAACATTCAGGGTATCACGAAACCTGCGATTCGTAGGTTAGCGAGAAGAGGTGGTGTGAAGAGAATCAGTGGTTTGATCTACGAGGAAACCAGGGGGGTTCTGAAGATTTTCTTGGAGAACGTGATTCGAGATGCTGTGACCTACACCGAGCACGCTAGGAGGAAGACGGTGACTGCCATGGATGTGGTTTATGCGCTCAAGAGGCAGGGAAGGACCCTCTACGGTTTTGGAGGCTAAAGAATTTAACCCTTCTTTTCTGGGTTGCAGGATAAGACATTGGTTCTTTTGAATTTGCGTGGTGTTTTAGTTTAGGTTTGTTATGTATCATACGAATCTCTGGTTTGCATAGAAAATATTTCATTTGAAATTTAAATGGAGTATCG…
Gma.11070.2.S1_s_at	CD393765	At5g59970	1e-40	Cell Structure			CTGTTCTTCTGAAATTCGGTGTGATGTTTAGTTTAGATTCGTTCTGTAACATATGAATCTTCAAAGGTTCTGTTCGGCACAGAAAATGTACTACTTTAATTGAAATTAAAATGAAGGAGCAGCGTTTTCGTGG
Gma.11125.1.S1_at	BE822591	At2g41740	1e-132	Cell Structure			GGATGAGTTCAACACTGTATTTGGAATGGCAAAAGAAGCATTTTACAAGTTGCCAAGATGGAAGCAAGACATGCTGAAAAAGAAATACGAATTGTTCTAAACTTGAAATGAAAGAGTGACGTCTGCTTCTTTAGCTGCTATACCTTTCCTCAGTTATCTTTAAAATGCTCTTANCTGTTGNGATAGTGTGGTTTTATTGGGTATATACCATAGTTTGGGTTCTTATCATAGCGTTTTGCTTTCGGCCTATATAATGGGCGTAGCTGTGGTTAGTGTCCAAGTTTGAATGTGACGCCGCATGCATGGAGAGTGTTTTTTAGTTTCTCCTTTTAGATTTTGCTGTTGCCTCTTGCAATGTTTGCATATTGTAGCAATGAAGACACTAGACAGTGGGCAGGT…
Gma.11176.1.A1_at	CD392100	At5g65360	3e-65	Cell Structure	Histone		CCCACCCAATTCAGTTTTCTCAAATGGCTCGTACGAAGCAAACGGCTCGCAAGTCCACCGGCGGCAAGGCGCCACGTAAGCAGCTGGCCACCAAGGCGGCTCGTAAGTCTGCTCCGGCTACCGGCGGCGTGAAGAAGCCGCACAGATTCCGTCCGGGAACCGTAGCGCTCCGCGAGATCCGGAAGTACCAGAAGAGCACGGAACTTCTGATCCGGAAGCTCCCGTTCCAGCGATTGGTNCGNGAGATCGCGCAGGACTTCAAGACCGACCTTCGATTTCAGAGCTCCGCCGTCTCCGCCCTCCAGGAAGCCGCCGAGGCCTACTTGGTTGGTCTCTTCGAAGACACCAATCTCTGCGCTATTCACGCCAAGCGTGTCACTATCATGCCCAAGGATATTC…
Gma.11213.1.S1_s_at	CD394730	At5g10980	4e-71	Cell Structure	Histone		AACGTGCTTAGGCTAATAATAAGAGTAATAACGTAGTTGCTGCTGCTTTTTTTNCGTTTTGCAATACATTTCTTGTTTTAGGGTTATTTTTAGTGTTATGTTCCGGTTTGTCTGTTATGGGATGTATAGAAGATAGATATATCNATCAACNACTTAGCATTTGTAATGATCCTAAACTGAAATATTT
Gma.11213.1.S1_x_at	CD394730	At5g10980	4e-71	Cell Structure	Histone		TGGAGTCAAGAAGCCTCATCGCTATCGCCCTGGAACTGTTGCTCTTCGTGAGATCCGAAAATACCAAAAGAGCACAGAGCTTCTGATCCGCAAGCTCCCCTTCCAGCGTCTTGTTCGTGAAATTGCGCAAGACTTCAAGACCGATTTGAGGTTCCAGAGTCACGCTGTTCTTGCGCTTCAGGAAGCTGCGGAGGCTTACTTGGTGGGTTTGTTTGAGGACACCAACTTGTGTGCGATTCACGCCAAGAGGGTGACCATCATGCCAA
Gma.11213.2.S1_at	BQ298544	At5g10980	1e-71	Cell Structure	Histone		GGCTGCAAGAAAATCTGCACCTACCACCGGTGGAGTCAAGAAGCCTCATCGCTATCGTCCTGGAACTGTTGCTCTTCGTGAGATCCGAAAATACCAAAAGAGCACAGAGCTTCTGATCCGCAAGCTCCCCTTTCAGCGTCTTGTTCGTGAAATCGCGCAAGACTTCAAGACTGATTTGAGGTTCCAGAGTCACGCGGTTCTTGCGCTTCAGGAAGCTGCGGAGGCTTACTTGGTGGGTTTGTTTGAAGACACCAACCTTTGTGCGATCCACGCCAAGAGAGTGACCATCATGCCCAAGGACATTCAACTCGCACGCCGCATCCGTGGAGAACGTGCTTAGGCTTATAATAATGATAATAGCATAGTTGTCGCCTTTTCGTTTTGCAATACATTTCTTGT…
Gma.11154.1.S1_s_at	AW309927	At1g63220	5e-44	Disease & Defense			TTGGCGTGGCAACCATTCATCTGGATCCAGTGTTTGAAGCGGGTAGTATTCCAGAAACTGCTTACAAGGTTGTGAAGGACGAAGAATATTGTGGAGAGATTAAGGTGGCTCTCACTTTTACTGTTGAGAAAAATGAGGAGCAGGATTATGCTGAACCTGAAGAGAGCTATGGTGGATGGAAAGAATCCAGTGGGGAATTTTAAAGTGAAAGAAGTATTTACATACTTCCATGGCCAGAATTACCCTTATAATGAAAAATAAGCAGTTTTGGGGTACTTTTTGAGAATTTCCATTATTGTGTTTTCTGGTGTGAAGCAATGGTGTTGTGCTGTTAGGTTGCTTTC
Gma.11154.2.S1_at	BU547879	At1g63220	4e-46	Disease & Defense			GAGGCAACCATTCATTTAGATCCAGTGTTTGAAGCCGGTAGCATTCCAGAAACTGCTTACAAGGTTGTGAAGGACGAAGAATATTGTGGTGAGATTAAGGTGGCTCTCACTTTCACTGCTGAGAGAAATGAGGAGCAGGGNTATGATGCACCTGAAGAGAGCTATGGTGGATGGAAAGAATCCAGTGGGGAATATTAAAGTGAAAGAAGAATTTACATACTTCAATGGCCAGACTTACCTTTATAATGAAAAATAAGCAGTTTTGGTGTCACTTTTAGGCAATTTCCATTATTGTGTTTTCTGGTGTGAAGATCCAATAGTGTTGTGCTTTTAGGTTGCATTCCTCCCTTTGGATATTAAAGTACATTATGCTTGATATATTATCTTTTATGCGTCAGT…
Gma.11119.2.S1_s_at	CF920743	At1g24020	1e-05	Disease & Defense			AATAGAAGCGATTGATGAGGCTAACTTGGGATATAGCTATAGCGTAGTTGGGGGAGATGGGTTGCCAGACACAGTGGAGAAGATCACATTCGAATGCAAATTGGCTGCTGGCGCCAACGGAGGGTCTGCTGGGAAGCTAACTGTCAAATACCAAACCAAAGGAGATGCTCAGCCCAACCAAGACGACCTCAAAATTGGCAAAGCCAAGTCTGATGCTCTTTTCAAGGCCGTTGAGGCTTACCTTTTGGCCCATCCTGATTACAACTGATCCTCTTCATCACTATTCAGTCAGCAACGACCTTGCTTTATATTATATACAAGAGTTTTCTTGCCTTGTGTGGAGCTTTATCCAATCACTGTGTGTGGTGTGTGCTTAA
Gma.10988.3.S1_at	CA938233	At1g47128	0	Disease & Defense			TACAGTTGCTGCCCTAACGACTATCCCATCTGCAACACTTATGCTGGAACTTGTCTCAAGAGCAAGAACAACCCATTCGGAGTGAAGGCATTGAGGCGTACTCCGGCTAAACCCCATTGGACCTTTGGGCGTAAGAACAAGGTCAGCAGTGCTTAAGCAGATAAAGGAAATGTGAACGTGCAGGAAGGAGCCAATGATGAAGTAAATGAAAGACGAAGAATTAAAACACCAGCTGATACACTTCCCCTT
Gma.10988.3.S1_s_at	CA938233	At1g47128	0	Disease & Defense			TCTCAAGAGCAAGAACAACCCATTCGGAGTGAAGGCATTGAGGCGTACTCCGGCTAAACCCCA
Gma.10988.3.S1_x_at	CA938233	At1g47128	0	Disease & Defense			GTTGCTGTCCTCTTGAGGGTGCTACCTGCTGTGATGACCACTACAGTTGCTGCCCTAACGACTATCCCATCTGCAACACTTATGCTGGAACTTGTCTCAAGAGCAAGAACAACCCATTCGGAGTGAAGGCATTGAGGCGTACTCCGGCTAAACCCCATTGGACCTTTGGGCGTAAGAACAAGGTCAGCAGTGCTTAAGCAGATAAAGGAAATGTGAACGTGCAGGAAGGAGCCAATGATGAAGTAAATGAAAGACGAAGAATTAAAACACCAGCTGATACACTTCCCCTTTACCTTCACATAAATTTCTCTGTGCCATTTTATTATGATACAAATTGATACTATTCTGTATCAAATTTCAGTCAGATATTGGCTGTGTACATAGGGTTATATTATTGAT…
Gma.10936.1.S1_s_at	BI700784	At4g37520	1e-116	Disease & Defense			AACGTGGATCCTAGGATTGCCATCAACATGGACCCAACAACTCCTCGTAAATTCGACAATGTTTATTACCAAAACCTTCAACAAGGAAAGGGCCTCTTCACCTCGGACCAAATCCTCTTCACGGACCCAAGGTCTAGGAACACCGTTAATTCCTTTGCTTCCAGTACCAACGTTTTCAACTCCAACTTTGTGGCTGCTATGACCAAATTGGGTCGCGTTGGAGTTAAGACTGCAAGAAATGGGAAAATTCGTACCGATTGTTCTGTGCTTTAAGTTAAGGCTTTGGTTGATCATGTAAAGTCGCAAACAGTGCATGTTTTGGAGGTAAACAACAACACAAGTTGCAATTTTAGTGCGGGGGGATTTGCAAAGGGTAGTTAGATTCATTGTTGTTAATAA…
Gma.10720.2.S1_a_at	AW396215	At1g77490	1e-137	Disease & Defense			AAGTGTCATGTTTTCTTGTGCCAGTATCTTTTAGTAATACAAGAAGANGCTATTTTCAAATCANGTGATATCNCATGTAAAATNTNGAAGTTTTAAATGAAGAAGAAAGGAATAAANTTCAATAGTGTGCCTATTTGAATTGCAGAG
Gma.10658.1.A1_at	CA852384	At1g70890	1e-22	Disease & Defense			GAGTCGATCAAACACTGGACTTGTACNANAGATGGTAAGATTACAACATGTCTGGAGAGTATTGAATCCGTTGATGAACCGAACAAAACAATCACCTACAAGCTCTTCGGAGGAGATATTGGTCATAAGTATAAAGTCTTTAAGCTCATTTTTCAAGCTATTGACACCGATCATGGGGGTGTTATTATCAAATGGACCGTTGAATATGAGAAGATTGATGAGAATGTTGATCCTCCGTATGGCTACATCGAATACCTGCACAGTGGCAGTAAACAGATTGATGGCAATCTTCTCAAGCCATAGCTCCAAAAGTTATGCAGAAAATAATTAATAAGTAAGAAATAATTGGCTTGGCCTTAGAATATATAGTGCTTGTCTAGTTATCAGTATAAT
Gma.10757.2.S1_s_at	BG650239	At3g16920	1e-138	Disease & Defense			TGCTCATGATGCTTTTGTCGGCAGCTGGAAGCCTACCAAGAATGACACTATGGAGAATCGGGTTCCTGG
Gma.10773.1.S2_at	CD398431	At5g36930	1e-121	Disease & Defense			ACGGGACGAAGAGGCTCTGCCACATCCGCGGGAAGATGCACAAGAAGGTGTGGATCGCCGCCGGAGACATCATCCTGGTTGGACTCAGGGACTACCAGGACGACAAGGCTGACGTCATCCTCAAGTACATGCCCGACGAGGCCAGGCTCCTCAAGGCCTACGGCGAGCTCCCCGANACCACTCGCCTCAACGAGGGCATCGGCGCCGGCTTGGACGAGGAGGACGACGCCACCGCCAACGACTACATCGAGTTCGAGGATGAGGATATTGATAAAATCTAATCNCNCTCNCNNNCGCAATTATCATTCATATNNTNTCNTCNNNNTNTCTGTCTCTAGTAGTATTTCGCTCTCTGCTTG
Gma.10850.2.S1_at	CF920623	At1g76180	3e-11	Disease & Defense			GAAGACAGAGGAGGCCACAGCTACTACTCCTCCTCCACCACCACCTGTTGCATCATTGGAGCATGGTGAAGGTGCTCATCATGAAGGAGAGGCCAAGGAGAAGAAAGGTATATTAGAAAAGATAAAAGAGAAGCTTCCTGGTTATCACTCCAAGACAGAGGAGGAAAAGGAAAAGGAAAAGGAGAGTGGTGCTCATTGATATTTAAGATTGAGACAAGGCTTTTTTGTTGGTTGGAGATGCATGATTGTGGTGTGCTTTGTT
Gma.13160.1.S1_at	L10292.1	At3g09640	1e-107	Disease & Defense			TACTGACCAAGATATCGTTGCTCTATCTGGGGGTCACACTATTGGAGCTGCACACAAGGAGCGTTCTGGATTTGAGGGTCCCTGGACCTCTAATCCTCTTATTTTCGACAACTCATACTTCACGGAGTTGTTGAGTGGTGAGAAGGAAGGTCTCCTTCAGCTACCTTCTGACAAGGCTCTTTTGTCTGACCCTGTATTCCGCCCTCTCGTTGATAAATATGCAGCGGACGAAGATGCCTTCTTTGCTGATTACGCTGAGGCTCACCAAAAGCTTTCCGAGCTTGGGTTTGCTGATGCCTAAGCAACGTTTAGGGGATTGTTGAAGAGGCATGGTGCCCATAATATTTCTCTAAAAAATTGTATGGTCATGGTTTTTAATGCCAATGTGGGTTCCCCAGA…
Gma.12498.1.S1_s_at	BQ611770	At1g05260	1e-112	Disease & Defense			CCTGGAAGTCGCAAGACATTTGATCTTAGCTACTATAGTCACGTTATTAAGAGAAGGGGTCTATTTGANTCAGATGCTGCATTNTTGACTAACTCAGTTACAAAGNCNCAAATCATCCAATTGCTTGAAGGGNCAGTTGAAAATTTCTNTGCTGAGTTTGCAACCTCCATNGAGAAAATGGGAAGAATTAATGTGAAGACAGGGACAGANGGAGAGATCAGNAAGCATTGTGCATTNNTAAATAGCTAAGAATCTTGTCTTGTTCATGGATGAATCT
Gma.1190.1.S1_at	AF279267.1	At1g51680	0	Disease & Defense			TGAAAGGATATCTAAATGACCCAGAGGCTACAGAGAGAACTNTAGACANAGAAGGATGGTTACACACAGGAGATATTGGTTTCATTGATGATGATNATGAACTCTTCATTGTTGATCGGTTNAAAGGNAATTGATCAAATACAAAGGATTCCAAGTNGCTCCTGCTGAGCTNGAAGCNTTGTTGATTGCNCACCCAAACATTTCTGATGCTGCCGTTGTAGGNATGAAAGATGAAGCTGCAGGNGAAATTCCAGTTGCATTTGTTGTAAGGTCAAATGGTTCTGAGATNNCCGAGGATGAAATNAAGANATACATTTCACAACAGGTGGTNTTTTACAAGAGAATAGGTAGAGTTTTCTTCACGGACTCTATTCCTAAAGCACCCTCNGGCAAAATTCT…
Gma.1166.1.S1_at	AY151271.1	At5g34850	0	Disease & Defense			AGTACTGGGGACACAATCGCAGAAGAAGAAAACTGAAGCATTTTCTATTGAAAGTTATTGATGAAGTTGCCAGCATGTAATTTGAAGTTGAAGCACTAGCATATTTGGCGTTTTGAAAAGGATAAAAATGTGCCCCTTGATTAATATATGC
Gma.11336.1.S1_at	AI442808	At1g18250	6e-66	Disease & Defense			GCAATTAATTAACGAGTGCTCCTTGGTTTAAGTCGATCTCTCCATTATTACAACATGCCGGAAGCCCACCGGCGACCCTGGCGGAGTTCACCCTGGGCAACGAGCAGGACTTCTACGACGTGAGCCTGGTGGACGGGTACAACCTACCCATCTCCATCACCCCCTTCAAGGGATCCGGAAAATGCAGCTACGCCGGGTGCGTGAGCGACCTCAACACCATGTGCCCCGTTGGCCTCCAAGTGCGCTCACGCGACAACAAGCGCGTGGTGGCCTGCAAGAGCGCTTGCTCCGCTTTCAACTCCCCCANGTANTGNTGCACNGGCTCNTATGGAAGCCCACAGGCCTGCAAGCCCACCGTCTATTCCAAGATCTTCAAGACCGCATGCCCCAAGGCCTACT…
Gma.11263.1.S1_a_at	CA802847	At5g25610	4e-76	Disease & Defense			GGAAACGGGATTGCAGAAATACACCGTAGCACCGGGAGTGAAGAAGTTATCAGGGGACAAGGCTGTTGTGTGCCATAAGCAGAACTACCCTTATGCTGTTTTTTACTGTCACAAAACCGAGACCACCAGAGCTTACTCTGTGCCTTTGGAGGGTACTAATGGGGTTAGGGTTAAAGCGGTAGCAGTGTGCCACACTGACACATCAGAATGGAACCCTAAACATTTGGCCTTTCAGGTGCTCAAAGTTAAGCCAGGAACTATTCCTGTCTGCCACTTCCTTCCTGAGGATCATGTTGTTTGGGTTCCCAAGTAGATTTGC
Gma.1327.2.S1_s_at	BI970072	At5g25610	1e-53	Disease & Defense			AATGCTCGAGTTATTTCTACAGAAGCAGAAAAGGAAAGTAAGTCCCAAAAATTCTCGGTGAAAGATGGAGTGAAGTTGTTAGCAGAAGATAAGGTCATTGTTTGTCATCCTATGGATTACCCATATGTTGTGTTTATGTGTCATGAGATATCAAATACTACTGCGCATTTTATGCCTTTGGAGGGAGAAGATGGAACCAGAGTTAAAGCTGCAGCTGTATGCCACAAAGACACATCAGAATGGGATCCAAACCATGTGTTTTTACAAATGCTTAAAACCAAGCCTGGAGCTGCTCCAGTGTGTCACATCTTCCCTGAGGGCCACCTTCTCTGGTTTGCCAAATAGGTTACTTAAGTCTTTATTTGTTAGTGTGTCCTTAAATAAGTAGGCATTTCCATA…
Gma.15307.1.S1_at	U64866.1	At5g25610	2e-27	Disease & Defense			GAATCATCAAATGCTTCATCAACTTATGGGAGTTGATCCTGGAACTAACCCTGTTTGCCATTTCCTTGGAAGCAAGGCCATTTTATGGGTACCCAATTTATCTGTGGACACTGCCTATCAGACCAACATTGTTGCTTAATTAGTCCATGCATCTTGAGCACCATGAGAATGAGATTGTGTATAAAATAAATTATCATGTGCTGTGTGTTGTGCAAGTACTACCTTCTCTAGCTAGATTGCTAGAGCTAGAATTTCAACCTACCTATGTGTACTGATAAGATCTGC
Gma.15464.1.S1_a_at	AW101841	At1g08830	1e-64	Disease & Defense			GAGAATCGTCATGCTGGTGATCTTGGGAATGTTAATGTCGGTGATGATGGTAC
Gma.15464.1.S1_x_at	AW101841	At1g08830	1e-64	Disease & Defense			GTGCCCCTGAGGATGAGAATCGTCATGCTGGTGATCTTGGGAATGTTAATGTCGGTGATGATGGTACTGTCAGCTTCACTATTACTGACAGCCAGATTCCTCTCACTGGACCAAACAACATCATAGGAAGGGCGGTTGTTGTCCATGCTGATCCTGATGATCTTGGGAAAGGTGGTCATGAGCTTAGCNAAACTACTGGAAATGCTGGTGGCAGAGTAGCTTGTGGTATCATTGGTCTGCA
Gma.15464.2.S1_at	BG653526	At1g08830	2e-64	Disease & Defense			ATGGTTGCCTGTCAACTGGAGCGCATTTCAATCCTAATAACAACGAGCACGGTGCCCCTGAGGACGAGAATCGTCATGCTGGTGATCTTGGGAATGTTAATGTCGGTGATGATGGTACCGTTAGCTTCAGTATTACCGACAGTCAGATTCCTCTCACTGGACCAAACTCCATCATAGGAAGGGCTGTTGTTGTCCATGCTGATTCTGATGACCTTGGAAAAGGTGGTCATGAGCTTAGCAAAACTACTGGAAATGCTGGTGGCAGAGTAGCTTGTGGTATCATTGGTCTGCAAGGATAAACTAATCACATGAGGTTGGAACCGTGCTTTAGAATTGTGGAATAAAGTAGCACCCATTTAAACCCGTTTGGTTAGGTCCGGTCTGTGTACGGCTGAATTC…
Gma.17993.1.S1_s_at	BQ628525	At4g11650	2e-79	Disease & Defense			TGGACTTTAGTCCAACCTCGAATGGATGCACACGTGGCATAAGNTGCACTGCGGACATTAACGGACAGTGCCCTAGTGAGCTAAAGACTCAAGGAGGTTGCAACAACCCTTGCACTGTCTTCAAAACCGACCAGTACTGTTGCAATTCCGGTAGCTGTGGGCCCACTGATTATTCCAGATTCTTCAAGCAAAGGTGCCCCGATGCTTATAGTTACCCCAAGGATGATCCAACTAGCACCTTCAC
Gma.18032.1.S1_at	BG650211	At4g24190	0	Disease & Defense			TGTACCAGACTGCACTCTTTGAAAGCGGCTTCCTGCTTGATGATCCCAAGGATTTTGCTTCCCGGATTTATGATTCAGTGAAGACTAGCCTGGACATCAGTCCTGAAGCAACAGTTGAGGAGGAAGATGACACTGAAGTAGAGGCTGAAAGTGACGCGAAAGAAGATTCAAAGCCTGAAACTGATGCTGTTAACGATGATAATGATGTCAAGGACGAGTTGTAGATTTTGCATGACATCCACTATTTAATGACGGTGCTGCCGATTCCCCTTTGTTTGTTTTAGCTTTAAGATAGACCGTAAAAGACTTCTTTAGCATGAGTTTTGATTTCATAAGTAGTTAAAGGAGAACATTAGTCTTACTGTAATCATACTATCCCCTTGGAATTTTGCCTNACCA…
Gma.18084.1.S1_at	BI317557	At1g09090	2e-64	Disease & Defense			GGAGATGCTAGGTCAGCTTTGATCACAATGCTTCAGTCTCTTCACCATGCCAAAAATGGTGTGGATATAGTTTCAGGGACAAGGGTGAAGACTCATTTTGCAAGACCCAACTGGCGCAATGTCTTTAAACATGCAGCCATCAAACACCCTGACCAAAGAGTTGGTGTTTTCTACTGTGGGGCGCATGGATTGGTTGGGGAACTGAAAAAGCTTTCTTTAGACTTTTCCAGGAAAACCAGCACCAAGTTTGATTTTCACAAAGAAAATTTTTAGATTCTTTTCTCAGTTTATTTATTATTATTTTTGGCAACTGTAGTTATATATAGTTGGATCATTTTTTGTTGTAGTGGGTGGTATATAGCTAGCTGCATTTGATACATGGAACTTACATGTATCNAA…
Gma.17765.1.S1_at	BM188674	At3g60280	4e-26	Disease & Defense			TGTGCCCCATTTCAGGCCACTGTGCTGGAGGCATGAAGCTGCAAATTAATGTGGCTGCTGCTAGTGGGACCCCCCCAACAACCCCAAGTGGCACCCCACCAACCACCCCATCAAACCCTTCTCCTTCTCCTCCCTCTGAGTCAGGATCCACCAACACCACTTCACCACCAAAGCCTAGTGGAGCTGTAACTGTTTCCAGTGGCATTGGCCTTTTGGTGGGGTCTTTCTTTGTGTCAGCAATTATGTTTGGTTTCATGGGCTAGGGAAGAGGCAGTGCTGTTTTTTTTTTNATTCTCCTTTTTATTAATATGTTATTGTTTTGCTGAGAGTTTGTGTGAATTTCATCATTTAATCCAGATGTATATCTAATCTTGATATGTATCTCCTTTTAATATTTAA…
Gma.16507.1.S1_at	AW101606	At1g05260	1e-125	Disease & Defense			GACAAACTCAGTTACAAAGGCTCAAATCATTGAATTGCTTGAAGGGTCAGTTGAAAATTTCTTTGCTGAGTTTGCAACCTCCATGGAGAAAATGGGAAGAATTAATGTAAAGACAGGGACAGAAGGAGAGATCAGGAAGCATTGTGCATTTGTAAATAGCTAAGAATCTTGTCTTGTTCATGGATGAATCTTGTATCATTTATTTTTTGGGTTTGGTTATTTATGCTATGCCATGTTTTTTTATTAGTTATGCTATGCCATGTGGTGTCTGTCTACATATGAGTGATCCCGTATGGTATGGTTGTTGTATGTGCGATGGAATAAGTGGGTTCCATTGTTATTCTTATAATTTCCAACTTTGCTGGTAGATCTTGTAATAAGAAGCAGAATTTCTTGTGC…
Gma.15938.1.S1_s_at	CD405157	At5g41010	2e-21	Disease & Defense			AGCGATGGATCCTCAGCCTGAGCCAGTNAGCTACATNTGCGGAGATTGTGGAATGGAGAATACGCTGAAGCCNGGTGACGTTATACAGTGCCGTGAGTGCGGTTACCGTATNCTTTACAAGAAGCGCACTCGTCGCATTGTCCANTACGAGGCACGCTGAAGAAAACTGCT
Gma.15877.1.S1_at	BU760936	At5g55850	2e-27	Disease & Defense			GTTCACAGTGATTTTTAATAAGGCCAGGGATGAGAAAAAGACAGGTGGNAACCCAGANTCACCAGGAAAGACTGCNACTGATCCTCATAGCAAACCTGCNGTAGAGCCTGGCAAAACTCANACTAAAAAATGGTTTTGCTGCATGCAAAACCCTTCTGCCGAATCATAGCATAGCAATGGTTGCTCCTGTGAAAAGCCTGAACAGAAGAACAATGTTTNNGTGTAACTAGNGTCACAGTATTTTCTCNAAGATAAGAGCTGTAGAGNCATAAGCGAATTCTACGGAATTTNTATTNTGTGNTGTAAAAGTGAGCTGCAATGGGGGAAAGAAAAGAAGACAGACTATTATTTATGTGTGTGTATCAATGTTGTGGTTTATTATTAGGAGCCAGGGTTGCT…
Gma.15568.1.S1_at	AI442650	At5g49040	3e-39	Disease & Defense			GGCTCCGTTGGAATCTTTGACACCCCTTTAACCGTGGGACCTGAGGTGTACTCCAAGGTTGTCGGAAAAGCCGAGGGCTTGTTTGCCTCCACGTCACAAACGCAGTTTGACCTGTTACTGATTTACAACTTCGCGTTGACCCAAGGGAAGTACAACGGCAGCACCATCACGTTCACGGGGAGGAGCCCCCTCTCGGAGAAGGTGAGGGAGCTGCCCATTGTTGGTGGTAGTGGGGTCTTCAAATTTGCCACTGGGTATGTTGAGTCTAGGACGCTAAGTTTTGATCCCCAAACAAGGAATAACACGGTTCAGTTCGACGTGTATATTTACTATTGATGATTATTGAATGTGTTTTTTTCATGTTGATGCGTTATCGCTTTGGTCTGTCTCACCTAGTTT…
Gma.2302.1.S1_a_at	AW307490	At3g45310	1e-148	Disease & Defense			AATATGGTCCCTGGTGACTACCACCTTGTCATGCTTCAGAGTTTAGAGCGTATTGCTGATGCCAGTATTGATGAATGATGATTAAAGATAAGTGTAATTGTATGATGAAAATTGCTCCTAGTTGGGTTGG
Gma.2302.1.S1_at	AW307490	At3g45310	1e-148	Disease & Defense			TGGAGTTTTCACTAGTGACACTTGTGGTAGCACTTCCCAGGATGTGAACCATGCCGTTCTTGCTGTTGGATATGGAGTTGAAAATGGTGTCCCATATTGGCTCATAAAAAATTCATGGGGAGAAAGCTGGGGTGAAAATGGCTACTTCAAGATGGAATTGGGGAAGAACATGTGTGGTGTTGCAACTTGTGCATCTTATCCAATTGTGGCATAAATTGCATAACAATATGGTCCCTGGTGACTACCACCTTGTCATGCTTCAGAGTTTAGAGCGTATTGCTGATGCCAGTATTGATGAATGATGATTAAAGATAAGTGTAATTGTATGATGAAAATTGCTCCTAGTTGGGTTGGCATGATGTATAAAATAAGCTAGAAGTTGTTGTAAATCACATAAGT…
Gma.2302.1.S1_x_at	AW307490	At3g45310	1e-148	Disease & Defense			TGGAGTTTTCACTAGTGACACTTGTGGTAGCACTTCCCAGGATGTGAACCATGCCGTTCTTGCTGTTGGATATGGAGTTGAAAATGGTGTCCCATATTGGCTCATAAAAAATTCATGGGGAGAAAGCTGGGGTGAAAATGGCTACTTCAAGATGGAATTGGGGAAGAACATGTGTGGTGTTGCAACTTGTGCATCTTATCCAATTGTGGCATAAATTGCATAACAATATGGTCCCTGGTGACTACCACCTTGTCATGCTTCAGAGTTTAGAGCGTATTGCTGATGCCAGTATTGATGAATGATGATTAAAGATAAGTGTAATTGTATGATGAAAATTGCTCCTAGTTGGGTTGGCATGATGTATAAAATAAGCTAGAAGTTGTTGTAAATCACATAAGT…
Gma.2302.2.S1_x_at	BU965409	At3g45310	1e-139	Disease & Defense			ACATGTGTGGTGTTGCAACTTGTGCGTCTTATCCAGTTGTGGCATAAATTGCATAAGAATATGGTCCCTGGTGACTACCACCTTGTCATGCTTCAGAGTTTAAAGATAAGTGTCATTGTATAATGAAAATTGCTCCTAGTTGGGTTGGTATGATGTATTAAATAAGTTAGAAGTTGCTGTAAATCACGTAAGAATATCATGGCCTGAATTGTGTGTA
Gma.2205.1.S1_at	AF127110.1	At1g70890	3e-23	Disease & Defense			CTTTCAAGCGATTGATAAGGAAAATGACAGTGCTATTATCAAATGGACAATTGAATATGAGAGGATTGGTNGAGGAAGTTGATCCTCCATATGGCTACATTGAATACGTCCACAAATGCA
Gma.2220.1.S1_s_at	AF128268.1	At1g17860	3e-17	Disease & Defense			TACTCAGAAATCTTCCGTGGCACACCAGTCAAATTCAGCATACCTGGGATAAGCCCTGGAATCATCTTTACAGGTACTCCACTTGAAATCGAGTTCGCAGAGAAACCNTATTGTGCTGAATCCTCCAAATGGGTGGCGTTTGTGGACAATGAAATCCAAAAGGCATGTGTGGGTATTGGTGGTCCTGAAGGTCATCCTGGTCAACAAACATTTAGTGGCACATTTAGCATTCAGAAATATAAATTTGGATACAAACTTGTGTTCTGTATCACTGGCTCAGGCACTTGTTTAGATATTGGAAGGTTTGATGCCAAAAATGGTGAGGGAGGAAGACGTTTGAATCTCACTGAGCATGAGGCCTTCGACATTGTTTTCATAGA
Gma.2102.1.S1_s_at	BM523392	At2g28670	8e-37	Disease & Defense			AGGGATTTTACATTGCCAGCGCTGTCGATGGAGCAAGTCAGCTTATGGCTTTCACCGCTAAGTTTGAAGAGAATGGTTACGTGGACAGTCTTAGTTTCTTTGGCGTTCATCTAACGCAGGTTTCGGAGTCTCAAATTGCCATCGTTGGAGGCACCGGAAAGTTTCTCAACGCAGAAGGCTTTGCCATTATTAAGACTTTTCCTGTTATCGGCGGTCAGCAACATAACACTGACGGTGTCCAGACTCTGTTGCAGCTCACTGCCTATCTGGCATACTAGCCTCTCTCTCTCTCTCTCTCTCTCTTATATGCTGTGCTG
Gma.2593.1.S1_s_at	CF922368	At3g09270	4e-44	Disease & Defense			GCAGTTATTGCATTCTTCCTTAGCAATAATGATGAAGAGCGAGAAAAGAGCATAGAGAAGATATGGGAGCATCTCAGGGTTGTTGAGAATCAGTGTTTTGGTGATCAGAAGAAATTTTTTGGGGGAGACATTATTAACATTATGGACATAGCTTTTGGGTCCATATTCAAAATTCTTGTGGTTGCAGAAGATATTCTTGACGCGAAGGTCCTGGAAGATGAGAAATTCCCTCACTTGCATTCATGGTATAATAATTTCAAGGATGTTGCAGTTATTAAAGAAAACCTCCCAGACCATGAGAAAATGGTGGCTTTTGCTAAGTTTATTAGAGAAAAACGTTTGGCATGTACCTAAGAAAGTAATCTTATATGAGATCAAGTATGAATCACTTTGTATCTG…
Gma.257.2.S1_a_at	CD400364	At3g12490	2e-14	Disease & Defense			AAACAAGTGGTTTCTGGCACCTTGTACTATATCACTTTGGAGGCAAATGATGGTGTGACGAAAAAGGTTTATGAAACTAAGGTGTTGGAGAAACCATGGTTGAACATCAAGGAGGTTCAGGAATTCAAGCCCATCACTGTTGCTGTTAATCCTCTTTCGGTGACGGTCTAGCACATAGCTAGGTTATGGAAGTGACTAGCTTGGCCGCAAGAGTAATAATATGTATGAACTGAATAAATGTACCTATTAACTCTACAAACGGTGTGGGGTTGTGCATGTTTGCCATCCTATATATTTCAGTA
Gma.2590.1.A1_s_at	CD406617		0.0001	Disease & Defense			GGAGGCAACCACCATTAACGAGCTGAAGAAGCCTGTTGTGGAGAAAGAAGCTCCAGGGCATGCCATATGAGGGCATGCACGTACGGCCT
Gma.2523.1.S1_s_at	CA852440	At2g15220	1e-74	Disease & Defense			AAATCCATCTCAGTGCAAGATACGTTGGAAACAATAAAGGGGACGTGAAAACAGAGATAACAGGTGTGCTGTACCATGAAATGGTGCACGTTTGGCAGNNNNNNGGGAATGGTCGTGCTCCTGGTGGATTAATTGAAGGTATTGCGGACTATGTTAGGCTGAAGGCAAACTATGCACCTAGTCACTGGGTGAAAGCAGGGCAAGGACAGAAATGGGACCAGGGTTATGATGTTACTGCACGCTTTTTGGACTATTGTGATAGTCTCAAAAGTGGGTTTGTGGCACAACTTAACAAGTTGATGAGAACTGGTTATAGTGATCAATACTTCGTTCAGTTACTGGGAAAACCGGTTGATCAGCTCTGGCGAGACTACAAGGCCAAGTATGGCAATATTGCCT…
Gma.2444.1.S1_a_at	AF035255.1	At4g35090	0	Disease & Defense			ATGATTGTTAGAGTTGCAGACGTGCAAAGAGTACGATAA
Gma.2444.1.S1_x_at	AF035255.1	At4g35090	0	Disease & Defense			TTCCTGCTAATGCTCCCAAGTGTGCTCACCACAANAATCATCATGAAGGTTTCATGAATTTCATTCACAGGGATGAGGAGGTNAATTACTTCCCTTCAAGGTATGATCCTGTTCGTCATGCAGAAAGNGTTCCCCATACCTCCTGCTATCTGCAGTGGAAGGCGTGAAAAGTGTGGAATTGAGAAGGAGAACAACTTNCAAGCAGCCCGGAGAGAGATACCGNTCTTGGGCACCTGACAGGCAAGATAGATTTNNTCGCCGATGGGTTGATGCTTTATCTGACCCACGGGTCACCCATGANATCCGCAGTGTCTGGATATCNTACTGGTCTCAGGCTGACCGTTCTCTAGGCCAAAAGATAGCNTCTCNTCTNAGCANGAGGCCAAATATTTAATGTTG…
Gma.2444.2.A1_a_at	CD401237	At1g20620	2e-22	Disease & Defense			ATATTTATATACCTTTTCGGCATGTTTCGCTGCTATTGTT
Gma.3081.1.S1_at	D31700.1	At3g12490	1e-71	Disease & Defense			ATCCAGCAAAGGTCTAATTCACTAGTACCCTATGAGCTTCATGAGGTTGCTGATGCAAAGGCTGAGGTCATTGATGACTTTGCCAAGTTTAATCTGCTTCTCAAAGTCAAGAGGGGACAGAAGGAAGAGAAGTTCAAGGTAGAGGTACATAAGAATAACCAAGGTGGGTTCCATCTAAATCAGATGGAACAAGATCATTCCTAATTCTGATNNGAAGTTTGGCCACGCTAGCAGTATAGGCCTGGGTGGCACCTAAAATATACCTTTTTTTTTNCAGTGGGGTGTATGAATCTTATTATCTATGCTATACATAATTATATACTAATNGGGTATTGTTCTTATCTCTGTCTCAGCAAGTATGTTAGTGCTTACCCCTTTCTCTAAGCCTTGGCAGATAAG…
Gma.3108.1.S1_at	CD409593	At1g29850	1e-41	Disease & Defense			AAGATTTTATATTGAGAGCTGCTCAGATGGGTCAGATAACTGAAAAGGTTTCTGAGGAAAGACTCATATCACTGTTGGAGCAGATAAACAACCAAACAACAAGGCAGACAAAAGTTACAATACAGAGGCGTCGAAGTGTTCTTGAGGATGATGATTAACTTTCACTGTCTCTTTAAACGGTGTGCCTTGAGTATTGATTTCATGCTTTATTATATATTTTACTAAGTATTGTATAAGTGGATTGAGAAATATATCTGTTTCAGATTGAAATTTTGGTTGCCTTGCCAGGCCTCCTAATTAAAATACTT
Gma.3118.1.S1_s_at	BQ786048	At3g09390	0.005	Disease & Defense			AGTACTCTTTTGACTTGAGTTACGTTGAGAAGACAACCACAGAGACTCTAGTTTTGGGTGTTGGGCCTGTGAAGGCCCAATTGGAGGGTGCTGAAATGGGTGTTGCATCTGAGAACGGTGGCTGCAACTGTGGATCAAGCTGCACCTGTGACCCATGCAACTGCAAGTAAGGTCAAGATGTATAACCTTGAAGCAGAGATAGCTGTAATATATGTATCAACAAATAATAAGAAGTAGAAGTTGCGTTTGGAGCTTTAGAATAAAGTGTTTGCTATGTGTTTT
Gma.3063.1.S1_s_at	BU549226	At3g09390	9e-09	Disease & Defense			TGAGGTGTTGGAGAGCTAAAGCTTCAAGCAGAAATGGCCCTTAGAAATAATGATAAAAACTATATGTAGTTTCAAAACTTCAAAATTATGTAGTATGTATTATGTTGCACTCTGGTGTTTTGTGTCTAAACAAACACCCTTAGAA
Gma.3153.1.S1_s_at	BE822687	At5g02790	6e-91	Disease & Defense			AGATCCAATACATCAAGCCGGTCCTGCCTTTGATTACTTAGAGAATGCTCTTGGTAAATTTGGTGATGGGCCATTCTTTCTTGGTCAATTCAGCTGGGTGGATATTGCTTATGTTCCATTTGTTGAAAGATTCCAGCTCGTCTTTGCTGATGTGTTCAAGCATGATATAACTGAAGGAAGACCTAAACTTGCAACATGGATTGAGGAAGTGAACAAGATTAGTGCTTATACACAGACAAGAGCTGATCCAAAGGAAATCGTTGATCTTTTCAAGAAACGTTTTTTGGCTCAACAGTGAAAATTTGGTTGCAGTGGGTATCCTCTAAGTTGTAGATTGTTGTCAATAAAGTGTTGTGTGTTTATCGGATGCTTCTTTAGTCACATGTTGTTTTGTCACTT…
Gma.2840.1.S1_s_at	CD404417	At3g12490	1e-35	Disease & Defense			GTGGTTTCTGGTACCTTGTACACCATCACTTTGGAGGCAAAAGATGGTGGGCAAAAGAAGGTTTATGAAGCCAAAGTTTGGGAGAAGNCATGGTTGAACTTCAAGGAGGTGCAAGAGTTCAAGCTTGTTGGAGATGCACCTGC
Gma.2773.2.S1_at	BU765875	At1g65870	2e-38	Disease & Defense			GCTACCGTCGAATACAATGCATATGTCTACCATTATTCTTCCACCAGCTCTTCTTCCTCTCCCCACCTTTTTAATCAGGGACTTCATTTATGTCATGGAGACTACTAAGCTTATAATAAACTCAGAAAAGAAATTAGACTACAGAAGGTGGGGGCATAAATCCAAAGACCAAGTTGCTAATTTACTCCTCTGAATCTGTCCAGTACTATAAATAAATTTGCTCTTTTCGTACACGGAATTAAGTCTTTGTTGTAGTGCAAGTTGCGTCAGCTAAATAATGTGCCACTCAAATATTTTTTCTTTTGGAAATGTTGCCCGTTGATTATTATTTGT
Gma.2821.1.S1_at	AI461152	At4g11650	4e-86	Disease & Defense			TGGGTGCGGTCCCACAGATTATTCCAAGTTCTTCAAGGAGAGGTGCCCTGATGCCTACAGTTACCCTATGGACGATGCAACCAGCATGTTCACTTGCATGGGATCCGATTATAGGGTTGTGTTTTGCCCTTAATTAATTCAACATCATCAACTACTTTTTTTTTNATTTTTTATTTTTATTTTCCTTCTCTAATTTCGTGATTCCTATTTGTGTTATTGTTGAATACTTTGATATGTGTATTATTTATCACCAAATAAAGACGTTCTTAATTGGGGGCTTTGGGCGCGGATCTCTGCCTGCTGAGATGTCCCAAAATAAGTNATAAACATTNACATAAATTAATTCACATGTCCCAAAAGAGTTCTTGTTATTAGAGTCCTAGGGAGTTGATTTATGAT
Gma.2821.2.S1_a_at	BI469945	At4g11650	4e-69	Disease & Defense			GACGCGGGAAGTGCCTCACCGGCGACTGCGACGGTGTTCTTGAGTGCAACAAAACAGGTACACCTCCGAACACGTTGGTGGAATTCGCGTTGAACCAGTACAACAACCTCGACTTCTACGACATCTCCCTCGTCGACGGTTTCAACATTCCCTTGCAGGTGAGCCCGACCTACAACTGCAGCTCCGTGAAATGCGCCGCCGACATCATCGGAGAGTGTCCCACTCAGCTTCAGGTTCCCGGCGGCTGCAACAACCCGTGCACGGTTTTCAATACGACTCAGTACTGTTGTAGCACCGG
Gma.2821.2.S1_at	BI469945	At4g11650	4e-69	Disease & Defense			ACAGGTACACCTCCGAACACGTTGGTGGAATTCGCGTTGAACCAGTACAACAACCTCGACTTCTACGACATCTCCCTCGTCGACGGTTTCAACATTCCCTTGCAGGTGAGCCCGACCTACAACTGCAGCTCCGTGAAATGCGCCGCCGACATCATCGGAGAGTGTCCCACTCAGCTTCAGGTTCCCGGCGGCTGCAACAACCCGTGCACGGTTTTCAATACGACTCAGTACTGTTGTAGCACCGGTGCTGCGGGTTGCGGTCCCACTGATTATTCCAAGTTCTTCAAGGAGAGGTGTCCAGATGCCTTTAGTTACCCTATGGATGACGCAAGCAGCATGTTCACTTGCATGGGAGGATCTGATTATAGGCTTGTGTTTTGCCCTTAATTAATTCATCAT…
Gma.3570.1.S1_at	CD397063	At3g52960	4e-68	Disease & Defense			AAGTCCTCCTGTTATCTGACGGTAACGGAACCTTCACCAAAGCCATTGGGGTCGAACTTGATCTCAGCGACAAGCCCGTTGGTTTGGGCGTTAGGTCTAGGCGTTACGCGCTTTTGGCCGAGGATGGGGTTGTCAAGCTCTTCAATTTGGAGGAAGGGGGTGCCTTCACTTTCAGCGGCGCTCAGGACATCCTTGATGTTCTTTGAATTATTCTTCCTCTTTCGTTTATTCCACACTCCAGTTACTACTCTTTTCAATCCGGTTAGGGTTTCTTTCCTCTCATAATAACGTGGATGGATTAATTGGACCTCAGTGCTGTTACTGTTACCTGTGCCTATAATAATGAAACTCATGTGCTGGTGTTGAGCTTTTGTGGCCATTTGTTTGGCATTTTCAGGA…
Gma.3578.1.S1_s_at	AW156522	At3g48990	0	Disease & Defense			TTCATTACCGATTCTTTGCCCAAGACTGCCACCGGAAAGATTTTGCGTCGTCTTGTGGCAGAACACTTTGTCTCTCAAATTTGAGCAACTCAAGTCCTACATTTGAAGACTCTATACCTGGCCATACATAGTTGGAGTCCACACACCATAAATTTCAACAGTAGTTTGGCAACTTGGCATTTAGGAGGAGGATATTTCTGCAAATGGTCTTTCATACAGGATACAGTATATTGTAGTTTTCAATGATTCATGTGAAATGTTCACAGTGTAATGTTTTCAAGGT
Gma.3612.1.S1_s_at	BQ452792		1.1e-39	Disease & Defense			AATCCACAACAAAAGCGTGCTGTAACAGCTGTCCTTGCACAAAATCAATCCCTCCACAGTGTCGTTGTTCAGATATTGGAGAAACATGTCACTCTGCATGCAAAACTTGTATTTGCACTCGCTCAATTCCTCCACAGTGTCATTGCAGTGACATAACCAACTTCTGTTATGAACCTTGCAACTCCTCTGAAACCGAAGCTCACTAGGAATATTGAGCATGTTCCAGTGACTAACATGTTTGACAGAGTCACTAGGCTTTGTTTTCATCT
Gma.3333.2.A1_at	CF922006	At5g25610	2e-10	Disease & Defense			AATCATATTATATTTAGGCAGCTTGGAATCAAGCCTGGGAAGGATGCAGTGTGCCACTTCTTCCCTATAAAACATCTTATGTGGGTTCCCAAGCCTTTACAAGCCACCATGTGAATGGAATGAGTTCCCTGGGTTTCTGTAATAAAGGTCAATCTCAACAATGATGACCATGTACCCTTTGTGGACTTCCTCTTTGTTTGTATGTCTTGTGCCTTGTTTTATGTTAAA
Gma.338.1.S1_at	AF145348.1	At4g21960	1e-148	Disease & Defense			CAAGGGTCTCTTGATAGTGGATCACCAACTAGCCAATGACAAGAGGACCAAGCCTTATGTGAAGAAAATGGCCAAGAGCCAAGACTATTTCTTCAAGGAGTTCTCTAGAGCCATTACCTTGCTCTCAGAGAACAACCCTCTCACTGGCACAAAGGGTGAGGTCAGAAAGCAGTGCAATGTTGCCAACAAGCACCATGATCAGGACCCTTGAATTTTCCTCCCCTTGTCTATGATCGAGGAAGAAAATCTGTAATATATTATGCAAAAAATAATTAAGGTCTTTTCCTTTAAATGGGCTGGTTCAATGAACCGAGACCACTGCAGGTTCATGGGGATGGGAGGATTAAGAGGCTATGTTTTTTAATCTTCCGATGTTACTGTTGTTTTTTTTTTAATTTC…
Gma.338.2.S1_s_at	AW569086	At4g21960	1e-110	Disease & Defense			ACAAGAACACTGCTTTCTCCTGGCTCAGGAACATCTTCCATGACTGTGCTGTTCAGAGTTGTGATGCTTCACTGTTGCTGGACTCCACAAGAAGGAGCTTGTCTGAGAAGGAAACAGATAGAAGCTTTGGGTTGAGAAATTTCAGGTACATTGAGACCATCAAAGAAGCTTTGGAAAGAGAATGCCCTGGAGTTGTTTCATGTGCTGATATCCTCGTTCTCTCTGCCAGAGATGGCATTGTTTCGCTAGGAGGTCCCCATATCCCTCTTAAGACTGGAAGAAGGGATGGTAGAAGGAGCAGAGCTGATGTGGTTGAGCAGTTCCTCCCAGACCACAATGAGTCCATTTCTGCAGTTCTTGACAAGTTTGGTGCCATGGGAATTGACACCCCTGGCGTCG…
Gma.339.1.S1_s_at	AF048978.1	At1g17180	3e-84	Disease & Defense			GAGGTGCCTTCAGAAAGAAAGCGTTGCCAAGTCTCTTCCTGATCAGCAAAAGGTTTATGAGTTCATTATGGATCTAAGAAAGAAGTTAGGCATTGAGTAGGTTGGAGCTTAATGGCCATTGTGAAGTAGTGGTTTTCCATTGGTCGTTCTTAGCCTTTCAAATAAGT
Gma.4077.1.S1_at	CD414118		0.0005	Disease & Defense			ATTGCAAGCATCATGGCTGAGGAGAAGCACCACCACCACTTNCACCACCACAAGGGCGATGATGTGCCTGGCGAGGTTGATTATAAGAAGGAGGAGAAGCACCACAAGCATCTTGAGCACCTTGGGGAACTTGGTGCTGCNGCTGCCGGTGCTTATGCCTTGCATGAGAAGCATGAGGCCAAGAAAGACCCAGAGCATGCTCACAGGCACAAGGTAGAAGAGGAGATTGCGGCAGCAGCTACTGTTGGTGCTGGTGGTTTTGTCTTGCATGAACACCATGAGAAAA
Gma.413.1.S1_at	BQ611370	At1g71695	1e-77	Disease & Defense			ATGCTACTATAAAGTTGAGTCAATTGGATGTGCTCACTGGA
Gma.413.1.S1_s_at	BQ611370	At1g71695	1e-77	Disease & Defense			GGACAAAACCCTAGCCAAGCAACTACAATCCACTTGCCCCGACGCAAACTCCGGCAACACCGCCAACTTGGACATCAGAACCCCGACTGTGTTCGACAACAAATACTACCTTGACCTAATGAACCGCCAAGGGGTGTTCACCTCTGACCAGGACTTGCTCAATGATNANANGACNTAAGGGGTTGGTCAATGCATTTGCGTTGAACCAAACGTTGTTCTTTGAGAAGTTTGTGGATGCTACTATAAAGTTGAGTCAATTGGATGTGCTCACTGGAAATCAAGGTGAAATTCGTGGCAAGTGCAATGTGGTGAATGCTAGGAAGTCTTTGTTGACGTCTGTGGTGGAAGAGGTGGTGCAATTGGTTGATCAGTTTTGAATGGAGCAAAAGTTTGTAAGTT…
Gma.3749.1.S1_at	CD392491	At4g24280	6e-43	Disease & Defense			TTACAACCAGCCGGGAGCTGCAGGTGCAGGAGGGCCAACACCACCTGGTGCCGACTCTGGCCCCTCAGAATCCTCAGGTAAGGGACCCGACGGAGATGTCATCGATGCAGATTTCACCGACTCTAAATGAGCAGCAGCCAGCTAATTACACCCATAGAGAGTATATGTTAGTATTTTTTNCCCCGTTATATGTTTTCTTCTGTTCCAAATTCTTAATGATTTTTGTCAATGGAGAGTAGGTGTGTGTTTCCTTCAAAAATTAGACACGGATTTCATAGGTGCTCATTGATGCTCGCTTTGTACCNTGGAATTTTGTCTCAGTAACACTGGTATTATTATGGGTGCAATTCATTTTATA
Gma.3810.1.S1_s_at	BI972063		0.009	Disease & Defense			GGCACAATTAGAATGTTTGCAATGTATTGAACTCCTTAATATGTCCTTACCCTTCAAGGGCTGCTTTGTGGTTTGGCAAAGTATTTGTACTTTTGTAGTAACAAAGAGTACTCTGATGGTAATAATTCCTCCTAAT
Gma.4235.1.S1_s_at	U12150.1	At2g02100	3e-09	Disease & Defense			AATGGTGGCAGAAGCAAGAACTTGTGAGTCTCAGAGCCACCGTTTCAAGGGGCCATGTTTGAGTGACACCAACTGTGGCTCTGTTTGCCGAACCGAACGTTTCACTGGAGGACACTGCCGTGGCTTCCGTCGCAGATGCTTCTGCACCAAACATTGTTAATTTTAAAAAATTAATTAAGAGTGCTTTGATAGAAGATGATAGATCTATCATCTTTCTACTCGTGTTGTTAATTAACCACTTTGTGATATGAGAATAAGGGTTACCCATTCTACTATGGGTTTCTTTGTTTGCCTCTTATTTTATCTA
Gma.4189.1.S1_at	AF039027.1	At4g21960	1e-151	Disease & Defense			CAACAAGCACCATGAGGAGCCTTAATTGCTTCCCGCTTAATTTGGGCCTTGAATTTTCTTCCCCTTCTCTATGTGGAAGAAATCTGTAAGATATTATGCAAAAAATAATTAAGGTGTTTTTCTTTAAATGGGTTGGTTGATTGGTTCAATGAACCGATCAAGACCACAGCAGGTTCATGGGGATGCGAGGATTAAGACGCTTTGTTTTTTAATCTTCCGATGTCACTCTTGTTTGTTAGTTTGTTTTTTTATTTTTTATTTCAATAAGTACTGTGCAAGTAGGTTAGAGTTGGGTAGAAGGGCATGTTCATGGTGTTAATTACTATGTTATGTATGCATGTGAGTGCTGCTATCGATGGCAAGATGTCAATGTATGCGTGTAGTGCTGTTATCGATGAG…
Gma.4330.1.S1_at	CD396375	At1g65870	5e-36	Disease & Defense			GGAGCGTTCTCTGAGCAATCAATAATCAAGTTACCCACAGACCAACCAAGGGTAGAGAAACTGACCCACTTGCATTTTTTCTACCACGACATCTTAGAGGGCAAGAACATCACGGTGGTGAAAATCATCGAGCCATCAGCGAGCGAGGTTCGTGAAGCAACTGGGTTTGGAACCACTTTCATGATGGACAATGTTTTGACCGAGGGTCCAGAGCTGAGCTCGAAGCACGTTGGGAGGGCTCAGGGGCTGTTTGGCTTGGCCTCTTTGGAGGACCGTGGAATGGTGATGCTCATTAACTTGGCTTTCAGTGAGGGTGAGTATGCTGGCAGCACTCTCAGCATGCTTGGGAGGAACCCTGTTCAGGACACTGTTAGGGAAATGCCCATTGTTGGAGGCACG…
Gma.4312.1.S1_at	BM523337	At2g43350	3e-74	Disease & Defense			AGAAGCTCTTGCAATCTTGAGTACTAAGATTTTATTCTACATATCTAATGTGCTGAGGACATAGGCAATCTGTCCGGTGTCTTCGAAGGACAAGTAGCAATATGTATCATCAATTAATATAATGCCCTGAA
Gma.4312.1.S1_x_at	BM523337	At2g43350	3e-74	Disease & Defense			GTGGTTTGACACAGACAAATTACAAAGAATTGAATGTATTGTACGAGAAGTACAAGAATCAAGGATTTGAAATCTTGGCATTTCCGTGCAACCAGTTTGCTGGACAGGAACCAGGAAACAATGAAGAAATTCAGGAAGTAGTTTGCACAAGGTTCAAGGCTGAATTTCCTATCTTTGATAAGGTTGAAGTCAATGGGAAGAATGCAGTGCCACTTTACAAGTTTTTAAAGGAGAAGAAAGGGGGAATATTTGGCGATGGTATCAAGTGGAACTTCACAAAGTTCTTAGTAAACAAAGAAGGGAAGGTTGTGGACAGATATGCACCTACCACCTCACCTCTGAAAATCGAGAAAGACATCGAGAAGCTCTTGCAATCTTGAGTACTAAGATTTTATTCTA…
Gma.4312.2.S1_s_at	AI939064	At2g43350	3e-36	Disease & Defense			GTTTGCACAAGGTTCAAGGCTGAATTTCCTATCT
Gma.4312.2.S1_x_at	AI939064	At2g43350	3e-36	Disease & Defense			GTTTGCACAAGGTTCAAGGCTGAATTTCCTATCTTTGATAAGGTNNNNNNNNNNNNNNNNNNNNNNNNNNNNNNNNTGAAGTCAATGGGAAGAATGCAGCGCCACTTTATAAGTTTTTAAAGGAGCAGAAAGGGGGAATATTTGGTGATGGTATCAAGTGGAACTTCACAAAGTTCTTAGTANACAAAGAAGGGAAGGTTGTGGACAGATANNNANCTACCACCTCACCTCTGAAAATCGAGAAAGACATAGAGAAGCTTTTGCAATCTTGAATAGTAAGATTTGATTCTACATATCTAATGTGCTGAGGNNANNNNNNNNNTNNNNNNNNNNTNNNNNNNNCNAGTAGCAATATGTATCATAAGTTAATATATGCCCTGAAAAGTTCTTAATGTATCT…
Gma.4312.3.S1_a_at	BF424240	At2g31570	5e-43	Disease & Defense			CATCTACTCCTTCCCTCATGGCTGAGCAATCTTCCAAGTCCATTTACGATTTCACAGTCAAGGACATCAGTGGAAATGATGTGAGTCTGAATAATTACAGCGGGAAGGTTCTACTGATTGTGAATGTCGCCTCACAATGTGGTTTGACACAGACAAATTACAAAGAATTGAATGTATTGTACGAGAAGTAC
Gma.4319.1.S1_s_at	CD393260	At3g07230	7e-15	Disease & Defense			ACCTATAATGACAGAGTGACAACAAATTTGCTGCATTCAGTTGTAGAATGATAATAGGTGGTAGNTATTGCATTTGGTTCTACAAAATTAAGATCATTTTGGCTGTGTTCTGAGGTATATGTGGTGTTTTAGACTTTGTTATTGTAATGGTTTGATTTTGGATATGGTTATAATGGACTCAAGTTGA
Gma.430.1.S1_at	CD403334	At4g16190	1e-140	Disease & Defense			TCTGGTGCTTATGCTCCAATTCGTTTTAAGGAAAAGCCTTACTGGATCATAAAGAATTCATGGGGGGAGAGCTGGGGAGAAGANGGATATTACAAGATCTGCAGAGGTCGCAATGTATGTGGGGTGGACTCGATGGTCTCAACTGTNGCTGCTATACATGTTTCTAACNATTAAATATAAGGATGGATGCCTAAACNTGGTAGGGGCACCAGTATAGTNTGTATGTAAATAATTTNCANGATGTANNATGTTATGNAGGAGGAAACTGCTAAGCNCATGTTTATGCTTTTATNCTGTAATTCTCTATGCTAGCTAGTCTAGCNACAAATNATTACCCACNGTTATNNANNNNNNANTGCAAGTAACCTGAATGAAATTAAT
Gma.4604.1.S1_at	CA802306	At4g14710	5e-94	Disease & Defense			ATAAAGGGTCCTGGCTTGTTATGCCTTGATGTACCCTCGCCAGTGTTTTTGTTGCCTGTCCCTGTATAAAGATTGCATTGTATTATTATTAGAATTGGGTACAGAATAAACATAAGCATATGTTAGTATGCTGATGTATATTTATG
Gma.4604.2.S1_at	AW317203	At4g14710	3e-93	Disease & Defense			GATTGCAATGATGCTTGGATTCGAGTGTGGGTCAAGAAAGGAGGAATGATCATCTTACCTGCTGGAATTTATCATCGCTTTACACTAGATGAGAGCAACTACATTAAGGCTTTGCGTTTTTTTGTTGGTGAGCCAGTTTGGACTCCACACAATCGTCCAAATGACCATCTCCCTGCAAGACAACAATATGTCAAGGATTTTGTGGAAAAGGATGTTGGCAACCATGCTGTTGATGCCGCCGCGTAAGATCTGGTTCCGCCTAATCGTAGTACGTGGGACTGAGACTTTGTGTTGCTAAAGTAAGGTTTGAACAAATGAAAATAATGGTGCCTTTAAATAAAGGGTCCCAGCTTTTTATGTTATGGTTTTTGTGTAGATGACCCTTTAAGCCTTTTACCC…
Gma.4999.1.S1_s_at	CF921017	At3g07230	9e-15	Disease & Defense			CATCTTTGCCATCAGTAAACGACAATGATTTACGACGTTAACTCTCCTCTTTTCCGATCCTTCCTCAGCCAGAAGGGAGGCTCCTCTGATAAGAGGAAATCGGACGAACAGAAGCCAAAAGAGCAGAAACCCAAAGCCAGCGAGAACAAACCTATAATGACTGAGTGATAACAGCTGAGCTGCATTCAGTTGTAGAATGAAAATAGGTGGTAGGTATTGTATTTGGTGCTAAACTAAGATCTTTTTGGCTGTGTTCTGAAGTATATGCCGGCGATGTTGGTCTTTGTTATTGTAATGGTTTGATTTTGGATATGGTTATAACGAAAACTTATAATGGACACAAGTTGAACTTGATGCACGCATGACACATGCAAT
Gma.5039.1.S1_s_at	AF243363.1	At3g09270	1e-62	Disease & Defense			TTGGAGCCAAGAATTTTTGAACCATCCAATTGTCAAAGAAAGTCTGCCCCCTAGAGATCCTGTTTTCTCCTTTTTCAAGGGTCTCTATGAAAGCCTTTTTGGTTCAAAATAGATTTGATGATGTGGTGTGAGACTTAGTATTTCTAAGAATTATGTGTTTGTTAAAGGCTTCTATGAAAGCCTCACTGCTTCAAAATAGATTCATGTATGTGAGACTCAGAATCTCTGGGGAAAATTGTGTGTGGTGTGGACTACTTGTTTTGTTTGTCATTGAGCTATATCGCTGTTAATTAGGATTTTGTTTCAAAATGATGCTTATAAGTTGTAATCTAGGATTTCTCCCTTTGAA
Gma.5141.1.S1_at	BI971102	At2g30210	3e-42	Disease & Defense			GAGGATCACCCTATGCATATTCATGGATTCCACTTCTTTGTAGTTGGTTCCGGCTTTGGCAACTTCAACCCAGCAACAGATCCTGCAAGGTTTAACCTTGTAGACCCACCTGTGAGGAACACCATTGGAACACCACCAGGAGGATGGGTGGCCATTCGTTTTGTGGCTGATAATCCAGGAATTTGGTTCTTGCATTGTCACATAGACTCACATCTGAATTGGGGTCTGGCAACGGCACTTTTGGTAGAGAATGGAGTTGGTCCATCACAGTCAGTTATTCCTCCACCCCCGGATCTGCCTCAGTGTTAAGATCAACAAAGCATCATTAGTCATAAATTTTATGTTCCTCAATTATTGGCTTGTTGTTTTACGAGGTCTTTAAATACTTGCTAAATAGAC…
Gma.5401.1.S1_s_at	AW351217	At1g60740	4e-61	Disease & Defense			ACAAGCATGTTAAGTTCCTTGCTGATGGTGCAGCCAAATACACCAATGCCCTNGGTCTTGAGCTTGACCTCACNGACAAGGGTCTCGGCGTCCGCTCAAAGAGGTTTGCTNTGCTGGTGGAAGACCTCAAGGTGAAGGTTGCNAATGTTGAAAGTGGAGGAGAGTTCACCATCTCCAGTGCTG
Gma.5971.1.S1_at	BQ610718	At5g66390	1e-110	Disease & Defense			GACCAGAATCTCTTTGTCCTAGACTTTGTTACCCCAATTAAATTTGACAACTTCTATTACAAGAACTTGNTGGCCAACAAGGGTCTCTTAAGTTCTGACGAAATTCTCTTGACAAAGAATNAAGTATCNGCGGATTTAGTGAAGCAGTATGCAGAAAACAACGATNTTTTCTTTGAACAATTTGCCAAGTCCATGGTTAAGATGGGAAACATTACTCCTTTAACAGGGTCAAGGGGNGAGATCAGAAAGAACTGCAGANGAATTAACAAGTGATGNAGTGATATCATTGTCATGTNNCACGTGTGANAGTTGCACCTACANTTTACTTTTCTTNNCTNTTGTTTACNGCATTAAAAAANAGGAGTGTCNATTGATCNATTCTGTGGTGAGTTGAGNAAG…
Gma.5947.1.S1_s_at	BQ610509	At1g24020	0.002	Disease & Defense			GTGACCAAACCAGTTTCGTGCTGCAAAAAGTGGATGCAATTGACGAGGCTAACTTGGTATACGACTACAGCATAGTGGGAGGGACGGGGTTGCATGAAAGTTTGGAGAAGGTTACATTCCAAACAAAGGTGGTTCCTGGCACTGATGGTAATGGCTCTATCGCCAAGGCCACTCTCACATTCCACACCAAANNACGATGCACCACTCTCAGATGCAGTGCGTGATGAAACAAAGGCCAGGGGTGCTGGAATTTTCAAGGCCATTGAGGGCTACGTTTTGGCAAATCCTGCTCAATGATTATCCTTCAAACCACTTGCATGCATGCAATAATAATTATATAAGCTTATGATCTGGTTGTTGGAGTTAATTTGTATCATGTGGCTTTGTTTGGTTTAATTA…
Gma.5950.1.S1_s_at	BQ610563	At5g49040	4e-41	Disease & Defense			TTGTACGCGGGCACCTCACAATCGGAGTTCAATTTATTGATTGTTGTGAATTTTGCCTTGACCGAAGGAAAGTATAATGGCAGCACCATCACCGTGGTGGGGCGGAACCGCCTCTCCCTCAAGATTAGGGAGATGCCTGTGATTGGAGGAAGTGGGGTTTTTAAATTTGCCACTGGGTATGTTGAAACCAGCACTCTCTATGTTGATGCTGATAGGTCTACCATTGANNNNAACATTTATGTTTCACATTACTGATCAATTTGTGGTAACTTTATGTTACAAAACTTCTTCTATGTTCCCTTACGTACTGCTATGATTAATTGGGTATGCGGTGTTTTACATATATA
Gma.5576.1.S1_a_at	CD417924	At3g10920	4e-92	Disease & Defense			TTGAGATGACAGATTTGCAGCACGGTAAGAGATGTGGAATAAAATGATNNNATGNNATGTAATANATANCACTANNNNTTTTATGTAGTTGTACTGAAGAACCTCGAGCAT
Gma.5576.1.S1_x_at	CD417924	At3g10920	4e-92	Disease & Defense			TGTGGCTTGGTCTGGACAAAGAGTTGAAGAGGCTTGTAGTTGAAACCACTGCCAACCAGGACCCACTGGTTACTAAGGGACCAAATTTGGTTCCATTGCTTGGTATTGATGTTTGGGAGCATGCGTACTACTTACAGTACAAGAATGTTAGACCAGACTATCTNAAGAACATTTGGAAAGTTATTAATTGGAAATATGCCAGTGAAGTGTATGAGAAAGAGAGCTCTTAGTCTGAANGNGCTACTTGATATAGCNNTTGAGATGACAGATTTGCAGCACGGTAAGAGATGTGGAATAAAATGATNNNATGNNATGTAATANATANCACTANNNNTTTTATGTAGTTGTACTGAAGAACCTCGAGCAT
Gma.6477.1.S1_at	AW309863	At1g71695	8e-79	Disease & Defense			TCTGACCAGGACATCGCGGGCAGCCCCAAAACCAAGGAAATCGTGAACCAGTTCGCTTCAGACCAGAAACTGTTTTTTAAGAAATTTTCCGATGCTTTTGTGAAGGTGAGCCAGCTAGATGTGATAACGGATCGTATTGGGAAAGGGGAGATTCGTGATAAGTGCTTTGTTGCAAATAAGAGAAGATCTTCTATGGCGTCTGTGGTGGAAGAAGTAGTGGAATTGGCTCAGGAGATATAATTGTATTGGGTCCTTTTGCTCAGGGTGTTCTTTTTTGTTTTTCTGAATGGATTGTGTAATAAACGTTGATATGTGTTTTCTTTTCTTGTTGTCTTCTCATAGATCATTGCTTTGGATTGGTTCAAAGTTTAACCAGTATAACATNNACAAGGCAAAAGT…
Gma.6533.1.S1_at	BM526206	At4g39090	1e-140	Disease & Defense			GAACTTTATCATTTGGTACTGGTAAAATTATCTCCGTATAGGATCAGGAAACTGCTAAGACCATGTTGTTTATGTAGTATGTAATTTCTGTATGTATGCTTGACATATACAAGTGGGAAATCCAAGGAAATGTGTGGTCCTAAAAATGGTGCAAGATAAGCAACTCTCTATGGAGATTGGCGGGGTGGGGTTGTTTCAAACTGCAACAGGGGAATACTTGCCACTGATTATGTCTCAGTTATTGCATAATTAAACTAATATACGTGCCACTGTCAATGTTGGTTCTTATGGATGTGGTAGTGCCATACCCAAAAGGATACCAAAATGTTTAAGTTGCTTCTGTACCTTTGATTCGTTTACCTTTGAGTTTGTGCATGT
Gma.6564.1.S1_at	BQ613091	At2g18980	7e-48	Disease & Defense			TCGCCAACCGACAGGGTCTGTTTACCTCGGACCAGGACCTGTTCGGTGATGCCCGGACTAAGGGAATAGTTAACTCCTTTGCTGAAAACCAGAAACTGTTCTTTGAAAAGTTTTCAAATGCTGTTGTTAAGTTGAGTCAGNTGGATGTGTTGACCGGGAAACAAGGACAGATTCGCGCCAAATGCTCCGTCCCCAACAAGAAGAAGGTGGTCACCTCTGTGGTGGAAGAAGAGGGAGTGGATTTAAGCGCTCAGATGTGAGATTAATTAAGGAATGTTTGTTTGTTAATAAATTAATGACCATGTTTCGTAGTAGACTAGTAATGTGATGTACGTCAGTTACATAAAAGGAGTTTCTCCCGTGTTACTACCTGCATTCCTGCAATCCTTAATTTCTATG…
Gma.6633.1.S1_x_at	U89693.1	At3g09270	3e-21	Disease & Defense			ATTTTACTGCCATAAAGTCCGTGAAACAACAGCTTTCNATGGTTCCATTGGTGGCTGGTGATGGAACCAAAACTCAGGCACTTGCTGTTTGCCACTCAGATACTTCTGGAATGAATCATCACATGCTTCATGAACTCATGGGAGTTGATCCTGGAACTAACCCTGTTTGCCATTTCCTTGGAAGCAAGGCCATTTTATGGGTACCCAATTTATCTATGGACACTGCCTATCAGACTAACGTTGTTGTTTAATTAGTCCATGCATCTGCATCTTGGGCACCATAAGATTGTATATAAAATAAATTATGGTGTGTTGTGTATGTTGTGCAAGACCTGGAACTTCACCTTTCTACGTACGTGTGCTGTTAGGATGCAGTGTGCTTTGATGATGCTT
Gma.6091.1.S1_at	AW310762	At4g35000	1e-102	Disease & Defense			TTTGATGGCCCTTGGACGGAGGACCCTCTGAAGTTTGATAACTCATACTTTGTGGAACTTTTGAAAGAAGATTCTGCTGGGCTGCTTAAACTTCCAACAGACAAGGCTTTATTGGAGGATGCTGAATTTCGCTGTTATGTTGAGCTATATGCAAAGGATGAGGATGCATTTTTTCGAGATTATGCTGAATCACATAAGAAACTTTCAGAGCTAGGCTTTGTGCCAAGTTCAAAGCCGATTTCTATTAAGGAAGGGACCATACTGGCACAAGGTGCTGTAGGAGTTGTAGTTGCTACCGCAGTGGTGATCCTCAGTTACTTGTATGAAGTTCGCAAAAGAGGGAAGTAAACTGGATTTGTTCATCTCTTGGCTGTTACGGTTGCGTGACCCTGACCCTGA…
Gma.6075.1.S1_a_at	AW317183	At3g11660	8e-74	Disease & Defense			TTGGTTCAACGCTGCACCGTCGGGGTTTGATGT
Gma.6075.1.S1_s_at	AW317183	At3g11660	8e-74	Disease & Defense			ATATACGTATTCTTCCTATCTTCCTCTACGTATTTCTTCTACGGATCACTTTGTTGTTAGACATACATATGTCTGTCTTCGTTACTGTATTT
Gma.6287.1.A1_at	BI969411	At5g60920	1e-34	Disease & Defense			AGGGTCTACTTCAACGGTGACAACTGTGTAATGCCACCACCTGATTCTTATCCGTGGTTACCNAATGCTGGTGCTAGGCAAGAGGTTTCCTTGTTTNCTTTAGTGATAGCATCTTTGGTAGCCTTGGTATTTTATGCNCNCGCATAAAGTTTCAATCTGTGNNGTACANTTAGNCTTGTAATAGAAAATTTTCAGTCAGANCAGTTTTGACTCATCTNTGATGTCAATTTGGTATTTGAAGCATATGGGAGGATGACATCCAAGATTAGNTCACGTGTCCNATGATTTGTTACNAGAGGATTNACATTGGTGGTAGAATTTGCTATTGTTGTGTTTGTTGTA
Gma.6231.1.S1_at	CD395324	At1g17860	2e-13	Disease & Defense			AGGGTTCTGGTTTGTGAGCACCAGTGGTGACCCTAATGATATCACTAGCAAGTTCAAGATTGAGAGGCTTGAAGGGGATCATGCTTATGAGATCTACAGCTTCAAGTTCTGCCCCAGTGTGCCTGGTGCGCTGTGTGCTCCTGTGGGGACTTTTGAAGATGCTGATGGAACCAAAGTCATGGCTGTGGGGGATGATATTGAGCCTTACTATGTGAGGTTTCAAAAAGTCTCCATCTTTG
Gma.6299.2.S1_at	CD397742	At1g04340	2e-32	Disease & Defense			TTGATGCCCGGCAATTCATTGCTACNATCATATTTCTTAAGGGGGTNGGAGGGATTTTGTTTGTGTTTGGNAGCACATTTGGATCTTTCNTACTGCTTTTGCATCTGGCNATTACTACTCCACTTCTGTACGATTTCTATAANCNATAGNCCCGGCAAGCCTAAGTACAATCAGCTGCTGAATGATTTCTTGCTGAACACAGCACTTTTTGGGGCATTGCTATTCTTTATTGGAATGAAGAACTCAATTCCCAGGAGTCAGCTCAGGAAGAAGACCCCTAAAGCTAAGACAGTTTAGAAAAAATAGAGCANNNGATGTATTAGTGTGCCAAAATGCTTAGTTTCGGCATTAAGTATTTGATCTTCAGCTGAGTTTGGAATAGTTACTTAGACCTATTAA…
Gma.6299.3.S1_at	BU547701	At4g14030	0	Disease & Defense			AAAATCCTAAACTGACTGGACAAGTATGGGTTGGTGGACTTATCCAGAAAGGAAGCCCTGTAGTAGCTATAACTGATGATGGTGAAACATGGCAAGCTGAAGTTCCAGAGATTCAGGGAAACAAGTTGAGAGGGGGCCCTCAGATGATTCAATTGAGTTTAGATGGGAAGCGGCTCTATGCTACCAACTCACTATTTAGTACTTGGGACAAACAATTTTATCCAGAGCTTGTCCAGAAAGGCTCCCACATAATACAGATTGAT
Gma.6332.1.S1_at	BG237174	At5g63380	4e-33	Disease & Defense			ATACAAGGGCTACCAGGTTGCTCCGGCAGAGCTAGAAGAGTTACTCCTATCTCATTCAGAGATAAATGATGCTGCAGTTATTCCATACCCTGATGAAGTAGCAGGCCAAGTGCCCATGGCGTTTGTGGTGAGACAACCTCAAAGTTCNNTTGGCGCAGCAGAAGTTATTGATTTTGTTGCCAAACAGGTTTCACCGTACAAGAAAATAAGGCGTGTAGCATTTGTTAATTCCATACCCAAGAATGCTGCGGGAAAGATACTGAGGAAGGACTTAAAACTGGCGCTCTCTAGGTTGTAATATGCTTCATTTTCGTTTTATAAGTGGTGTTTGATTTAGTCTTTTGCTCCAAATGAAAAAAAAAAAGAAGAAGCAATGCGTGTGTTCAGTTTAA
Gma.6315.1.S1_at	BE822317	At5g26990	2e-58	Disease & Defense			TATGTCCTGTTTGTGCGTTGAGGGTGGGGGTTGATATGGTAGCACATATAACCCTACAACATGGGAGTATATTTAAGATGCAGCGCAAGAGGNAATCACGGAAAGGTGGATCTTATTCAACACTATCTTTATTGAGGANNGAACTGCGAGAAGGAAATTTACAATCCCTTTTTGGCGGATCTTCATGTATAGTGTCCTCATCCAATGCAGATCCACTGTTGTCATCATTTATATTGCCTTTAGCGAATGAACATGCCAGCTCTCAGCCTCACTTACACACTGAGACAAGATCATCTAAAAAATGCTCAGATGAGACTGTATCAACAAGAAATGTGGAGACATCAACCTTGTCAGTTAAGGATAAGGAGGAGAAGGCAAAAAGATGCGAGTTTGTTCAAG…
Gma.7542.1.S1_s_at	CD402549	At1g32210	7e-53	Disease & Defense			GGATCATTTCCATTTAACTCCTTCCTATCAGGAGTACTTTCTTGTGTAGGAACTGCTGTTCTTGCTGTCTGTCTCAGGATCCAAGTGAATAAAGATAACAAGGAATTCAAGGATCTTGCACCTGAGCGTGCTTTTGCGGATTTTGTTCTCTGTAATTTGGTGCTTCATTTGGTGATCATGAA
Gma.726.1.S1_s_at	BG839313	At3g05500	4e-59	Disease & Defense			AAATACGCCGATCGCAAGGTCGCCGAATTGGACCGCCACGTTCCCTCCAACGTGAAGAAGGTCTCCTCCCAGGCCCGCTCCGTCGTCTCCGAAGTCCGCCGTGATGGTGTCTCCGCCTACGCCAAAATCGTTTACTCGAAGTATGAGCCCACGGCGGAGCAGTGTGCCGTCTCCGCATGGAGGAAGCTCAACCAGCTTCCGCTCTTCCCTCAGGTTGCCAATGTCGTGTTGCCCAAGGCTGCCTACTGCACTGAGAAGTACAATGAGGCGGTTGTTTCCTCTGCTGAGAAAGGTTATAGGGTTTCTGCTTATCTTCCTTTGGTGCCTACTGAGAAGATCGCCAAAGTCTTCGGTGGAAACTGATCTCGTTCTATTGCGTTTTTTAATTTCTATTTTTCT…
Gma.6803.1.S1_a_at	CF922291	At2g15970	7e-28	Disease & Defense			CACCATTTGGACTTGGTTGATATGTGAGAATTAAACCAAGTGTCTTCTGTATCATTCATTTGTTGCAACTTGATATCTATAAACACCCGGCCATTGT
Gma.6803.1.S1_at	CF922291	At2g15970	7e-28	Disease & Defense			ACCCGGCCATTGTTTTGTGATTCATGTTTGTCCTAAGACCTAAAGTTAGCATGTGTTAAAAAGTGGAATAAAATCTCAGTTTAAGTCCTCTGGTTTCATAGAATGTAGAAAACAAAAGATGAAGAGGATTGATGTGGTGTCTTTCTAGCTGTCGTGTATTCATAAATCATGTATGATTTGGGAAATCGTTGTATTTTTACCTGTGGGATATAA
Gma.6803.2.S1_s_at	BU082740	At2g15970	2e-53	Disease & Defense			GGTTTCAGAAACTCCTTCACTAAAGCTCACGGCATATCAAATTCCATTGGCATAATACTTCTGTTGGTTTATCCCATCTGGGCGCTGGTGGTCATACTTTTTTAGGCACCACCATTTGGACTTG
Gma.6743.1.S1_at	BE657937	At4g14420	7e-30	Disease & Defense			ATTGTTCCTGGTTGCTCATTATACCCATTTTCCATTTCTCCAGGATTTGNCTTTNGGTNTCTGTCTGGTTCAGAACGAATGTACCTTCTGTCNGATGNATTATGTNTAATTTATAATTANTNNTATATGTATNNTNNTTTTNNGTTTGCNTGACATTANAAACTNTCTTTCGATTACTAAACTTGTATACGAAGAGGGNNAAAAATGATCANAGCCNNTTCATTCAGACTGGGTGTCAATTTCGTTCTGTCCAACGGATTTGATCGAAAGGTGAAGTCTGGCA
Gma.6847.1.A1_at	CA853003	At5g15870	5e-60	Disease & Defense			GGTAGTTGGTGTTCTTTGGGCTAATAAGAGGGACAGTGGACTATGGTTTGCACCTNNNGAGTGGAGAGAATGTAGGCTTGGCATTCAACTCTTACCGATACTGCCTATCTCTGAGGTCTTGTTTTCCAATGTTGATTTTGTGAAGGAGCTTGTGGAGTGGACATTGCCTGCTTTGAATAGGGAAGGTGTTGGAGAAGGATGGAAGGGGTTTGTCTATGCTCTGCAGGGTATTTATGACNATGAAGGTGCAATGCAGAAGATAAGAAGCTTAAATGGATTTGATGATGGAAACTCATTGACTAATCTCTTGTGGTGGATTCACAGCAGATCTGATGACGAGGAATTTGGTCATGGAAAACACTGCTGGTTTGGTCATTACTGCCACTANGTATTGTTAAT…
Gma.6999.1.S1_s_at	AF529303.1		3.1e-56	Disease & Defense			TCACTGTCAAATACGAAACAAAAGGAGANNNNGNGCCNNANNCNNNACGANNTCAAAACTGGAAAAGCCAAGGCTGATGCTCTCTTCAAGGCCATTGAGGCTTACCTTTTGGCCCATCCCGATTACAACTAATCCTCTTCAACTTACTTGT
Gma.6999.1.S1_x_at	AF529303.1		3.1e-56	Disease & Defense			ATAGAAAGCATTGCCAGACACGGCGGAGGGTCTGCTGGGAAGCTCACTGTCAAATACGAAACAAAAGGAGANNNNGNGCCNNANNCNNNACGANNTCAAAACTGGAAAAGCCAAGGCTGATGCTCTCTTCAAGGCCATTGAGGCTTACCTTTTGGCCCATCCCGATTACAACTAATCCTCTTCAACTTACTTGTTATCACTTTCTTGCTTTTTCTTGCTTGGA
Gma.6999.2.S1_s_at	X60043.1	At1g24020	1e-07	Disease & Defense			TCACTGTCAAATACGAAACAAAAGGAGATGCTGAGCCCAACCAAGACGAACTCAAAACTGGAAAAGCCAAGGCTGATGCTCTCTTCAAGGCCATTGAGGCTTACCTTTTGGCCCATCCCGATTACAACTAATCCTCTTCAACTTACTTGT
Gma.6999.3.S1_s_at	CF921432	At1g24020	8e-05	Disease & Defense			CTAATCCAATTCGATCAACTTCATGATTATCATCACTATCTCTCTTGCTTTTTCTGAGACTTCATATATCTGTA
Gma.8144.1.A1_at	BU548599	At5g05340	5e-32	Disease & Defense			AAAGTCTAACTGTCCAAGCACTGGCGGAGACAGCAACCTTTCCCCACTTGATGTCACCACAAATGTTGTATTTGACAATGCTTATTTCAAGAACCTCATCAACAAAAAGGGGCTTCTACATTCTGATCAGCAGTTATTTAATAGTGGTGGTTCTACAGATTCTCAGGTCACTGCCTATAGCAACGACCCTTCAGCTTTCTATGCAGACTTTGCTAGTGCCATGATCAAAATGGGAAACCTTAGCCCCTTAACAGGGAAAAGTGGCCAAATTCGTACTAATTGCCACAAGGTTAATTGATTAATTACAGAAATAATATGAGCCAAAGACACGCTCATTCAGTCACAATACGTATGGCCTAGTTTATGTTTAGTGATAATAATCTAAGAATATAATATTGA…
Gma.8399.1.S1_at	BU546941	At5g14930	3e-73	Disease & Defense			AGAAGCTATCCTTTCATGCAAAGTGTTGAAGGATGAACAATCTAGTGTGACAGAGAAGGAAGAGGAAACTGGGAAGTTGCTTGAATTCGAGAAGTATGTTTATGGGTTGCTCACGAAATATGAAGTGTCATCAGAGATTTTCCTAAGGCAAAGCAGCTACATGATTTGGTGGAATCAGTATAAGGCAATTAAGGGAACTTCTTATAATTCAGCACTCGCAGACTTCATGAGCAATCCCGATCATTATAATGTGCTGTATATTAAGGGAACTTATAATTTCCCCCCTCAGGCTTAGTGATTAGTGAACGTCCGTGTGGTTGAACAGTGTAAAATAAATTGTGGTTTTATCTCACTGTGCACCTTTTAATAAGCTTTTTTTATATTTTCCCTTGTTGATTT…
Gma.8498.1.S1_at	AF329816.1	At1g12520	1e-107	Disease & Defense			ACAGTAAAGAGCCACTGGGCGACCTGGGAACACTAGAAGCTAACGAAAAGGGTGAGGCCTTCTATAGTGGGGTCAAAGAAAAGCTGAGGGTGGCTGATCTTATTGGACGATCTGTGGTGGTATATGCAACTGAAGATAAATCAGAACATGGTATAACTGCTGCAGTAATTGCCAGAAGTGCTGGGGTGGGTGAGAACTATAAGAAACTCTGTACGTGTGATGGCACCACCATATGGGAGGCCACGGATACAGATTTTGTTACTAGCAAGGTCTGATAGATAAAGTAATTCACTGAAAACAAAGCATTGCAATTTAGTTGTCTTGTCGCCCATCAGCTCTACCATATTTTGAGGATTGTATCCGCCTTTCAGGA
Gma.9010.1.S1_at	CF921194	At1g70890	1e-23	Disease & Defense			GATAAGGATCAAGGCGGTGCTTTTATTAAATGGACGGTTGAATATGAAAGGCTTGCTGAGGAGGTTGATCCTCCATATGGATACATCGAATACCTGCACAAATGCACTAAAGATATTGATGTTCATCTTCTCAAAGCATAGCTCTAAAAGTTATGCACTAAGAAATAATGGGCTTGGCCTCTGGATAAGTGCTTATATGTATAATAATCGGTGTGGAGTTTGACGAGAAGGATGCTTATATAGATCCTTCCTTTGTATGGAATAAACTTGGATATGCATGTCGGTGATGTCTTGTATGTGTTAAATTATATATGTGGAAGTGCTCAACGTGATACATATGAATATTAATGAATGTTTTATGATCGATTTTGCTA
Gma.8957.1.A1_at	BU764905	At1g70890	3e-34	Disease & Defense			TAATATCATACAGCCTCTTTGATGGGGAAATCAGTGAAGGTTACAAGAGTTTAAGGGGCACATTACAAGTGATTAATAAGGAAAATGGAGGAATTGTGAAATGGACCTTCGAATATGAAAAGCTGCAGGAGAATATCACTGCTGCATCTCCTGATTCTTTTTTGGACTTTGCTGCTAAGGTCACTAAAGATATTGATGATCATCTTGTCAAGGCATAGCAAGAAAAAAAAAGAGTGTGTGATTGGTGATGAAGTGGGTTTGGCTAGAGTTTTAATCCTTATTATCTAAATAAAAGCATCATTTAGTAAACTTTGGAATGCCGGATGTGTAATAATGATATATATGCTTCTTAGTGTTCCTTGTTTGTGATAGAATGCATGGATATGATGTTTGTTCGTT…
Gma.8518.1.S1_at	AF243362.1	At3g09270	1e-65	Disease & Defense			GTTGAAGAGTCATATGAGGCTCTGCAGTTTCTTGAGAATGAGCTGAAGGACAAGAAGTTTTTTGGAGGAGAGGAAATTGGGTTGGTAGATATTGCTGCTGTCTTCATAGCATTTTGGATCCCTATAATTCAAGAAGTATTGGGTTTGAAGTTATTCACAAGTGAGAAATTTCCTAAGCTCTACAAATGGAGCCAAGAGTTCATCAACCACCCTGTTGTCAAACAAGTCCTTCCTCCTAGAGATCAACTTTTTGCCTTCTACAAAGCCTGCCATGAAAGTCTTTCTGCTTCAAAATAGACTTATTTAAGGATAGTTGTGTGAACTACTGGTCTCTCATTTGTGAGTTATTGCAGTTTGAATTTCATGTCAATTTGGTTTTATATGTAATTTAGTAACCTG…
Gma.876.1.S1_at	L78163.1	At5g06720	4e-88	Disease & Defense			AATTTGGACCTGAGCACACCTGATCAATTTGACAACAGATACTACTCCAATCTTCTGCAGCTCAATGGCTTACTTCAGAGTGACCAAGAACTTTTCTCCACTCCTGGTGCTGATACCATTCCCATTGTCAATAGCTTCAGCAGTAACCAGAATACTTTCTTTTCCAACTTTAGAGTTTCAATGATAAAAATGGGTAATATTGGAGTGCTGACTGGGGATGAAGGAGAAATTCGCTTGCAATGTAATTTTGTGAATGGAGACTCGTTTGGATTAGCTAGTGTGGCGTCCAAAGATGCTAAACAAAAGCTTGTTGCTCAATCTAAATAAACCAATAATTAATGGGGATGTGCATGCTAGCTAGCATGTAAAGGCAAATTAGGTTGTAAACCTCTTTGCTAG…
GmaAffx.10710.1.S1_s_at	AW278629	At4g30320	3e-55	Disease & Defense			TAGAGCACTCCAACGGACCTTACGGTGAGAACATTTTCTGGGGCAGTGGCACGGGGTGGAAGCCAGCACAAGCTGTTAGTGCATGGGTTGAAGAGCGCCAATGGTACAATTATTGGCACAATTCTTGTGCCAATGGACAGATGTGTGGACATTACACTCAGATTGTGTGGAGCACCACCAGAAAAATTGGTTGCGCTAGCGTTGTTTGCTCTGGTGGTAAGGGCACCTTCATGACTTGCAACTATGATCCTCCTGGGAACTACTATGGAGAAAGACCTTACTGAAAATTAATTATAAGAAGTGAGACAAGTCAATAATGTTCTAATAGGATCATAGTAGCTACCCATGTTCTCCGCTGGCATATTACTATTGTCTGATTGCCATGTGCCCATGTGCATG…
GmaAffx.13912.1.S1_at	BI699258	At2g01890	9e-65	Disease & Defense			GAAGTTCTACTACGATGGCCAAGGAGTCATGTCTGTGAAGGTCACTGAAACTGAAATTGACATAGTATTCTATGATGTCTATGGCCATGTTCTACACAAATGGAACACATCCAAACAGCTTCACGCAAGTTGGTGAACAAGTTCAAGATCGAATCCAAGGCATTTAATTATGAAACAAGAAAAGAAAGAAAAAATAAATCTCGGGGACAAGAAACAAAAGTGCATACAAGATAGGAAAAAACAATTGAGCCCTATCATCTCCCCATCTGGTTTGGCTTCATATTTTACACTATGCAATTGACTAAAATCTGTTGTATAATAGTATCTACGGAAAAAATTCTCTCCATTTCTTTCATTTTTATGATTTTGAAAAAATAAATAATGATATTTTCTATTTAA…
GmaAffx.16271.1.S1_at	CA936304	At2g37130	1e-128	Disease & Defense			GAACATCTTGCAACACAAGGGTCTTCTNANTGTGGATGAAGAGCTTGCCACTGACCCAANAACNGCANCTTATGTCCAAAAGATGGCCAANGACAATGANTATTTCAACCAACANTTCTCAAGGGCCATNNTTTTGTTNTCNGAGACNAATCCTTTAACAGGAGATGAAGGNGAAATCAGAAAGGATTGTCGCTACCTCAATGCCAATTAAATATATAACATAAGGTTGCCCTTTGTGCATGATAATATGTATAATTAGCATAGATTATAATGCACGAGTGCGCCAAAATAAACGGGTGGGACGTACTGGGCCTAGGTTACCATATTCAGTGCAATACGCCATTGGGCCTAGCCTTATGTATACGCTTATGTTTGGGCTTTTACTTCCTGCACGTTCCC…
GmaAffx.36484.1.S1_s_at	BI425441	At2g14580	2e-50	Disease & Defense			GTAAAGGTGATTGTCAACTGATCCACTCTGGTGGTGGTGGCCAATACGGGGAGAATCTTGCTATGAGCACTGGTGACCTAAGTGGCACAGATGCAGTGAAATTGNGGGTTGATGAGAAGTCTAACTATGACTACAATTCTAATTCCTGTGTTGGTGGAGAGTGTCTGCATTACACTCAGGTTGTTTGGAGAGACTCTGTGCGTCTTGGATGTGCCAAAGTAGCATGTGATAATGGAGGCACTTTCATCACTTGCAACTATGCTCCTCCTGGCAACTATGTTGGCCAAAGACCCTACTAGGTTGTTACATTTGTAGCAGCGAGATGGCTACCATTTAAGATGATGAGTTATATACCATACATATTAAGAATAAATAATAGCATCATGAATTTATATAGAT…
GmaAffx.36514.1.S1_at	BE658341	At5g05340	1e-58	Disease & Defense			TTTCTCCAACAAAGGTTTTTCATCTAAAGAACTGGTTGCTCTTTCAGGATCGCACACAATTGGGCAAGCTCAATGTTCAAGTTTCAGAACAAGGATTTACAACGACACCAACATAGATTCCTCTTTTGCAAAATCATTGCAAGGAAATTGCCCTAGCACAGGTGGTGGCAGCACATTGGCCCCTCTTGACACCACCAGCCCAAACACCTTCGACAATGCTTACTTCAAGAACTTGCAGAGCAAAAAGGGTCTCTTGCACTCAGATCAAGAGCTCTTCAANGGAGGATCCACNGACTCTCAAGTAAATTCCTACAGCAGTAATCCTGCAAGTTTCNAAACTGACTTTGCCAATGCAATGATTAAAATGGGGAACCTTAGTCCNCTCACTGGGTCTAGTGG…
GmaAffx.40923.1.S1_at	BG653848	At4g14030	2e-06	Disease & Defense			TATGGATTTAAGCTTACGTGTCGTTATTTCCCTTTAATAAACGGTATCTGTCATATGGTTGTAATGAGCTATTATGCTTTATAAATAATGCTCCTGTGAATCTTCAACATTTCGAAGACAGTTTGCAGTTGCATAAATATATGAAGCTCGTCTCCAAAAAA
GmaAffx.43227.1.A1_s_at	CD416630	At4g11600	8e-15	Disease & Defense			GTTGGATGCATGAATGAAGCTATGAATGACTGGAGCTGCCAATAAATGAATTGTGATTAGAATATAAATTATGAATAAGAAATGTATTGCAGATGCTGCTGCAATTTCCTGTGTGCCTTGTATGTGTACCGAAACAGTTACTCTTGTAGCTCTGACATTAGGTT
GmaAffx.42847.1.S1_s_at	BU578388	At2g14580	3e-49	Disease & Defense			GATTTCATTATGTCTATTGTGTGTGTTGGGGTTAGTCATTGTGGGTGATCATGTTGCGTATGCTCAAGACTCACCAACAGACTATGTTAATGCACACAACGCTGCAAGATCACAGGTTGGTGTTCCAAATATAGTTTGGGATAACGCAGTCGCTGCTTTTGCACAGAACTATGCTAACCAACGCAAAGGTGACTGCAAACTCGTCCACTCTGGTGGTGATGGAAAATACGGGGAGAATCTTGCAGGAAGCACCGGTAACCTAAGTGGGAAAGATGCAGTGCAATTGTGGGTGAATGAGAAATCCAAGTATAACTACAACTCCAACTCGTGTGTTGGTGGGGAGTGCCTGCACTACACTCAGGTCGTTTGGAGAAACTCTTTGCGCCTTGGATGTGCCAA…
GmaAffx.45690.1.S1_at	BG237455	At3g45310	2e-15	Disease & Defense			GCATCTTATCCTGTTGTGGCTTAAATGTATGCAGAGAGATGTGGTGCCCGATATGCCCGTGTAACTGCACCTTGCACGTCATGCTTCGTATCGTCCATCTTAAAGGGTGAAACATTGTACTGCGATAAAAATTTACAGTATATGTTGATGTTTATCTGTAAAATAAGTTTGGAATTGGGATGTTCATTCTNCTTGANCTNNATNNCATTACAAAATCGTACTGTAAATCATTTGTCACATAGAGGTATCATAGAAATTATAAACTGTGTTATGCTCCCCAATCTCTAGCAATGTAAGGATAGCGTGCTGTGTAAAATCTGCGCACACTTGAGTTATCATCAGTCCCAATGGAGTAAAGTTTATTTGGTTAGTCCATCTCAATATTACTTT
GmaAffx.46214.2.S1_s_at	AW351024		1.1e-35	Disease & Defense			GTGAAGTTCCCACTAGTGTTGGATTCAGTTGTGAGCACAATGGTTAAAAGGCCNAAACAAGTCGAGGAGCNNNAANGAGAANGAAGAGGAGGAAGAGGTTTTGGTGATTGAAGGGATTGAGTTTGAGAGAAACACACCTGTGAAATTTGATGTGTTTATCAATGATGAAGATGATAAGCAGATTCGACCAGATAATACAGAATTTGCAGGAAGCTTTGTGAGTGTGCCTCATTCACATATGCACAAAAACAAGGACATCATTACTTGTTTGAGGCTGGGACTTACGGATTTGTTGGAAGAATTGGAAGCGGAAGATGATGACAGTGTTAGGGTGACGCTGGTTCCGAGATATGGGAAAGGGCGTGTNAAAATCAGAGGCATCAAAATAGAGCTTCTTTC…
GmaAffx.46214.3.S1_at	BM094597		1.1e-94	Disease & Defense			GACTTCAATCTCGAGGATCCTATTTCCAATGGNAAAATTTCCAACAACCTCACCATAATGTATAGGCAAGTTGTGTCTAANGGGAAGACTCCTACNTTGTTCCTTGGAAATCCTTACCGTGCTGGGGATGAGCCTGACCCGGGTTTTGGATCAGTAGAGAATGTTCCACATGGCCCTGTTCATCTTTGGACCGGTGATATCAACCAACCTAACATTGAGAACATGGGAACTTTCTATTCAGCTGCAAGAGA
GmaAffx.46222.1.S1_at	BG650417	At5g62740	9e-18	Disease & Defense			ATAGGAGCATCGTCAAGGTCCTCGTCTGTGTTCATACCTCACGGTCCTGGGGNNGTTAAAGACATTGCCGTGCAAATTCGGGATGGTCTCCTTCAGGCCACTGCCTCACAGAATTAAGCTTTCTTGGAGTTGTAAATAACAAATAGTATGTGTGTCAGGTTTTTTTCAGGAAATGCTTCTTTTGTTTGAACTTATAAAGTCTGCATCTTTACTCTTCTTATATTTGATAGATTCATAGCAGTGTCTATTTTATGTGTAAGTACTGATGTGCAGTTTTGAATACTTGTTTAAGGATAGTCTTAATGTCAAGTTGCTTGTGAATCATTAAGGAATTTGTTATGTAAGAATTACTTCCCNAAANANNNNNNNNNNNNNNANTGTCCTATCTTGCAAGTGGAT…
GmaAffx.5264.1.S1_s_at	BM521512		4.1e-29	Disease & Defense			GTTGGTGTTTTGTACATCTAATGATGATAGTTCGTGTGGGGATATTGTGGCTCCCATCGATCGTGAAGGAAACAGGCCTTTGATTGTGACTCATGATCAGAATCATCCATTGTTGGTTCAGTTTCAGAAAGTTGAAGCTTATGAATCATCAACTGCATGAGTTGGCCTTGAAAAATCATGCACGTGCTTTCCGGAATTATTCCGATACTTTGGTTACTTGTAAGACCG
GmaAffx.59462.1.S1_s_at	BI469429	At3g60280	5e-20	Disease & Defense			AGGGTCTCTTCCATTCACAACCTTAAACCTTTCTTTCTTGTAAACTTTATTGATTGATTCTGAGAATAGAACTAAGAGGGTATAGACATGGCTAGCGCAATTGCAGCTTCTTTTTTGGTTCTGCTTCTGGCTTTCCCCACTGTATTTGGAGCTGACCATGAAGTTGGTGACACTAGTGGATGGGCCCTCGGAGTTAATTACAACACCTGGGCCTCTGGGAAAACTTTCACAGTTGGTGACACTTTGGTGTTCAAGTATGACTCCACTCATCAAGTTGAT
GmaAffx.59534.1.S1_at	CD417706	At4g21610	3e-33	Disease & Defense			AGATGATGAAGGTCCACCTCCGGGATGGCAACNTCTCCCCGCTCAGCCACCGCCACCGCCACGTCCATCCGGTTGGGCTCAAATGGTTTGCGGTTCTTGTCNTCGCCTGCTTTCATATCCACGAGGTGCCAAACATGTCAAATGTTCATGCTGTCAGACTGTCAACATTGTATTAGAAGCTGATCAGGTTGGGCAAGTTAAGTGTGGCAGTTGTGCGGTATTGCTGATGTACCCATATGGTGCTTCACAAGTTAGATGTTCATCATGCCGATTTGTGACAGAAATTGGGGCACACAACAAGCGGCCTCCATGGTCTGTACAACAAAGGAAGCCATCTCCTCCAAAAACTGGTTGTTAGTGGCCTGTCCGTTGGCCTAGTAGATGGATCATCCT
GmaAffx.7312.1.S1_at	AW459535	At4g24190	1e-06	Disease & Defense			TTATGATTCAGTTAAGACCAGCTTGGACATCAGTCCTGAAGCAACAGTTGAGGAGGAAGATGACACCGAATTAGAGGCTGAAAGTGATTCAAAGCCTGAAGCTGATGCGGTTCATGATGGTGATGTTGATGATGCNAAGGACGAGTTGTAGATTTGCATGACATCCACTATTTAATGACGGTGCTGTCGGTTCCCTTTGTTTTTCATGGTTTCAGCTTTAAGATAGACCGTAAAAGCCTTCTCTAGCATGAGTTTTTTATTTCACAAGTTGTTAAAGGAGAACATTAGTCTTACTGTAATCATACTATCCCTTGGAATTTTGCCGTACCATATCAGTCTTAACACAATGTTCAAGTTCCTAGAAAATATGCTTGTCTTTTTTATATTTTATTTTTAGCA…
GmaAffx.70414.1.S1_at	BI943959	At3g05600	1e-26	Disease & Defense			GGCATCGTAGATGTACCGGTTAAGTTCNNNNNAGGTGGCGTTGACTTGGTGTACACTTCTCCGGGGATGAAGGAGTATATCCACAACGGTGGTTTCAAGAAAGATGTGCCAACTTTAGAGGAAGTGGTGGTGCAGGAAGGGGTTGCACACTTCAACAACCAAGAAGCAGCAGAGGACGTGAGCAATCACATCTACGACTTCATTAAGAAGTTCTGATTCTCATCAGTGCTTAATCATTCCATTATGTCCACAACTTTGTGCCGTTTTCTGTTTCAATCAACCCGAATAAAATCATACCGTTTTAGTGCGCGTCTAGATTGCAAATTT
GmaAffx.6635.1.S1_at	CD412718	At3g11660	3e-11	Disease & Defense			GAATATGTTATTGACACTTGTGGTATGTATACTCTACTCGATCCGATCCAGTGTATTTTTATAGGTACCAATTTCTTCTTCCACTGTTGTTATTGTACGTGTACCTTGTGTACGAATTGGTCGTTAGATGTTTCTATTTTACGTTTTGCTATAGAAATGTGAAGCAGACAAAAGAGTCTCAGATATAGCAAAATTACAAGATGCAAGATGGAGACTAAATGTAATTGAGCTACGATGGCAATAAAATTTCTTGTTTCNANNTNNNANAANAAANNANANNANANNNNNANNAAACGTCCACACGGTGTCATTATCTTTCGTTTTCTCAA
GmaAffx.666.1.S1_at	BM143164	At1g03230	7e-29	Disease & Defense			ACAGAGCCTAGAATGTCGTTCGTTAAAGCTTCAATTGTTATCGGTGGATATCAGTTGGAGGACAATCTTTTGGAGTTTGATGTGGCTTCCTCCAAATTAAGCTTCAGCTCATCGCTGTTGCTCCACAATGCCACATGTTCACGTACTTGAATGTCATAGCCTTATAGCCTTATTACGTGTTGAAATTAGCCACTTTCAATTATCTAGTAGCTTCTATATCTTTCAA
GmaAffx.78614.1.S1_at	BQ611991	At3g52120	9e-07	Disease & Defense			TTACTGAACTTGACATTGGGTGCTTTGTGCAACTCTTCAGGAAAAGTTAACTTTTACAAAGTGGGATGAACTGGTGTGTTGATAGTAGGGTTTTTATTGTGTGCTGCAGTGCTTGTAGTCTTTTGAAACTAATATTTGGGGGAGAAAAGAGGGGGAAGGGGTAATGTTCACTTCAATCGCATTTTTATCCGCCAAAGAATAATGGGTTTTTGGTTATTTTTACTTGTCAGAGCTTTTGGAACATGTTTTTTGTATCGCAAGCATATTATGAAG
GmaAffx.84858.1.S1_at	CA853434	At4g33300	1e-132	Disease & Defense			AACTGCCACAGTTTGAGTCAACTACCTGTTGAATTTGGCAAACTAAGATCACTAGAGATCCTCCGTTTATATGCTTGTCCATATCTAGAAACACTTCCTCCTANCATGTGTGACATGAAGAGATTGAAGTATATTGATATTTCTCAATGTGTTAACCTCACATGCTTCCCTGAAGAGATTGGTAGATTAGNANGCTTAGAGAAGATTGACATGAGGGAATGCCCCATGATTAGGTATTTACCGAAGTCTGCAGTGTCATTGCAATCTCTGCAGCTTGTAATTTGTGATGAGGAGGTACAAGATATGTGGAGTGATGTTGAGATGTCCAACTCAAATGTTCTTATTCAAGTAGCAGAACAACACTATGATCTAGACTGGCTTCAAGAGTGACCCATGTGT…
GmaAffx.88845.1.S1_at	CK605838	At2g14580	3e-48	Disease & Defense			TAACATGCAAGCATAGCATCATGAATTTAGCCAACGACTTTAAATTCGTGTTGTAATACTTTTCAATGTAT
GmaAffx.88251.1.S1_s_at	BU964415	At3g05600	7e-56	Disease & Defense			AGCAGTGGTGTTGTTCTTGCACGGCTTCCCAGAACTCTGGTACTCATGGCGCCACCAGATTCTAGCTCTGAGCTCCCTCGGTTACCGTGCGGTGGCACCTGATCTCCGTGGCTACGGTGACACAGAGGCCCCTTCTACGGTGAACAGCTACACGTGTTTTCATCTGGTGGGTGATATCATTGCTCTCATCGACTCTCTGGGTGTGGACAAAGTGTTCCTGGTGGCTCATGATTGGGGTGCCATCATCGGTTGGTACCTCTGCTTGTTCCGACCAGACAGAATCAAGGCTTATGTGTGCCTCAGTGTC
GmaAffx.88762.1.S1_at	CK606334	At3g09270	9e-53	Disease & Defense			CAAATGGAGCCAAGAATCCCTTAACCACCCTTTTGTGCAAGAAGTC
GmaAffx.88762.1.S1_x_at	CK606334	At3g09270	9e-53	Disease & Defense			TTTCTGGTCCAAATTCATTGATGATAAGNNTNTNGGTGCTGNATGGAAATCNGTTTTCACNGNTGATGAGAAAGAGCGTGAGAAGAATGTTGANGAANCANNTGAGGNTCTNCAGTTTCTTGAGAATGAGNTNAAGGACAAGAAGTTNTTTGGAGGAGAGGANNTTGGGTTGGTAGATATTGCTGCTGTCTNCATAGCATTTTGGNTCCCNATNNTTCANGAAATNGCAGGGTTGNAGTTATTCACNAGTGAGAAATTTCCTANNCTCTACAAATGGAGCCAAGAATCCCTTAACCACCCTTTTGTGCAAGAAGTCCTT
GmaAffx.85114.1.S1_s_at	AW760844	At1g24020	3e-06	Disease & Defense			ACTCTTGCTGAAGGTTTAGGTTATGTGAAGCACCACGTAGATGCAATTGACACAGAAAACTATGTGTACAACTATAGTGTGATTGAAGGCAGTGCATTGTCGGAGCCATTGGAGAA
GmaAffx.86757.1.S1_at	BM567976	At5g28010	5e-26	Disease & Defense			ACTGGACTTATGTCATAGACGGCAAGGTACACACATGTCAGGAGAGTATTGAAGCCATTGATGAAGAGAACAAAACAATCAAATTCATGCTCTTCGGTGGAGATATTAGTCAGCACTACAAGAGCTTTAAGCTGATCTTTGAAGTGACTGATAAGAACGATGGCGGTGCTGCTGTTAAATGGACTCTTGAATATGAGAAGATCAAAGAGAATATTGATCCTCCACATGGCTACATGGACTACTTTGACAAATCCACTAAAGAGATGGATGCTTATCTTGTCAAGGCATAGCTCCTAAAATTATCAAGAAAATAACAACAAAGGAGTAATGGATTTGGCTTTGAGGATATATATATATATATATATATATATATATANNNNNNNNNNNNNNNNNNNNNNN…
GmaAffx.89649.1.S1_s_at	CK606251	At2g43350	6e-47	Disease & Defense			TATCTTTGATAAGGTTGAAGTCAATGGGAAGAATGCAGCGCCACTTTATAAGTTTTTAAAGGAGCAGAAAGGGGGAATATTTGGTGATGGTATCAAGTGGAACTTCACAAAGTTCTTAGTAAACAAAGAAGGGAAGGTTGTGGACAGATATGCACCTACCACCTCACCT
GmaAffx.90331.1.S1_s_at	CF806056	At1g70890	4e-23	Disease & Defense			AATAAAATCGGTGTGAAGTTTGACGAGAAGAATGCTTAGTTATGTAGAT
GmaAffx.90390.1.S1_at	CF806115	At1g71695	4e-96	Disease & Defense			GACTTGCTCAATGATAAGAGGACTAAGGGGTTGGTCAATGCATTTGCGTTGAACCAAACGTTGTTCTTTGAGAAGTTTGTGGATGCTACTATAAAGNTGAGNCAATNNGATGTGCTCACTGGAAATCAAGGTGAAATTCGTGGCAAGTGCAATGTGGTGAATGCTAGGAAGTCTTTGTTGACGTCTGTGGTGGAAGAGGTGGTGCAATTGGTTGATCAGTTTTGAATGGAGCAAAAGTTTGTAAGTTATGTGTAGTTCTTCTTGTGTGGTGTTGTTTAATTGCTAAGGATATGGGTGTGTTCTATTTTGGGGATTGTTGTTTCCTGTTTGACATATGACTCATGTAATAAGGATAAAGTGTTCAGTATTATGTGCTTCTATTTTGTCCATTTTCTCTTG…
GmaAffx.90134.1.S1_s_at	CF805859	At5g34850	8e-77	Disease & Defense			GAGGGTGAAAGCATGCGATCTGTTTTTGAGAGCTGGTTCATCGAGTACAAAGTTGATGTGATCTTTGCTGGCCATGTCCATGCTTATGAAAGATCATATCGATACTCTAATGTTGACTACAACATAACAGGCGGTAACAGGTATCCATTACCTAACAAATCAGCACCTGTTTACATAACAGTCGGAGATGGTGGAAATCAAGAAGGTCTTGCTTCAAGGTTTTTGGATCCACAGCCAGAATATTCTGCTTTTCGAGAAGCAAGCTACGGACATTCCACACTGGAGATAAAAAATAGGACCCATGCTATCTACCACTGGAATCGCAATGATGATGGCA
GmaAffx.89795.1.S1_s_at	CK606628	At1g24020	8e-10	Disease & Defense			GAGGATCCATTGTGAAGTCCACAAGCAAATACTATACCAAAGGTGATGAGCAACTCGCCGAAGAATATGTGAAGACTGGCAAGGAGAGATCTGCAGGTTTCACCAAGGCTATTGAGGATTTCATTCANGCTAATCCTGATTACAACTAATTAAGTCACCAATTATAATTATGTCTCAG
GmaAffx.89772.10.S1_s_at	CK606097		1.1e-53	Disease & Defense			AGGCTCTTGATTCCTTCAAGAGTGTTGAAAACGTTGAGGGAAATGGTGGCCCNGGAACNATCAAGAAGATNACTTTCNTTGAGGATGGAGAAACCAAGTTTGTNCTGCACAANATAGAANGCNNTTGATGAGGCNAACTTGGGATANAGCTACAGCGTNGTNGGNGGTGCTGCNTTGCCAGACACNGCGGAGAAGATCACATTCNACTCCAAATTGGNTGCTGGTCCCAATGGAGGNTCTGCTGGNAAGCTCACTGTCNAATACNAAACNAAAGGAGATGCTNAGCCCAACCAAGACNAACTCAAAACTGGAAAAGCCAAGGCTGATGCTCTCTTCAAGGCCA
GmaAffx.89772.14.A1_s_at	CK606614		7.1e-32	Disease & Defense			ATTCAGTGATCTGCAAAGACCTTGTTTTATATTATATACAAGAGTTTTCTTGCCTTGTGTGGAGTGTTATTCAATCACTTTGAGTGTGTGGTGTGGCTTCCAATTGATGTAACGAGTGTTTCCTTTCTTATTTCCTTTTTCCACAGAATTGTGAGAGCCAGTTGATGTCTTTGTATGTCACT
GmaAffx.89772.4.S1_at	CK606338		1.1e-56	Disease & Defense			AATTATCATCAGTGTCTTGCTTATCATATACAAGAGTTTCCTTGCGTGGAGTACTGTTATTTAGTACTTTGTGCTCAAGTTTTAAGTTGGCTTTCAATGTAATGAGTGTTTCCTTTTATTTTCTTTTGCCTCAGAATTGTAAGAGCTAGTCGATATCTTTGTACCTCCTTCATCAATA
GmaAffx.89705.1.S1_s_at	CK606718	At1g76180	1e-11	Disease & Defense			TAATCGATCATCACTTCACTTCACTAATACATCATGGCAGACGAGACCCAGAACAAGTATGAGAGCTCTGAGGTTGAGGTCCAGGATCGTGGTGTTTTTGACTTTCTCGGTAAGAAAAAGGATGAAGAAGACAAGCCTCATCCTCAGGAGGAGGTCATCGCCACCGAGTTTCAAAAAGTCACTGTCTCAGACCAAGGAGAGAACAAGCACAGCCTCTTAGAAAAGCTTCACCGATCTGACAGCAG
GmaAffx.93642.1.S1_s_at	CF809367	At2g15220	1e-12	Disease & Defense			GTATGGCACTAGTTAAGAGGCTATGAGAGCTTTGTACGATATTTTTAAAAATAAGCGAGAATGTCGCAATCTATTTGTAGATTAATTTGTATTAAGTCTATGTGTATTCAGCAGAATGGATGTTGTACCTAACTCTGATCTGTAAGCCGTGTGTGTGTGCCAATAATTGAA
GmaAffx.93338.1.S1_s_at	CF809059	At4g16190	6e-94	Disease & Defense			GTCTTCAAGTCCAACCTCCGCAGAGCCAGGCTGCACGCCAAGCTCGACCCCTCCGCCGTCCACGGCGTCACCAAATTCTCCGATCTAACTCCGGCCGAGTTCCGCCGCCAGTTCCTCGGCCTCAAGCCGCTCCGCTTCCCGGCGCACGCCCAGAAGGCGCCCATCCTCCCCACCAAGGATCTCCCCAAGGATTTCGATTGGCGAGACAAAGGAGCCGTCACTAACGTCAAGGACCAAGGGGCGTGTGGTTCGTGTTGGTCTTTCAGTACGACGGGAGCGTTGGAAGGAGCTCATTATCTGGCCACTGGTGAGCTCGTGAGCCTTAGCGAGCAACAGCTTGT
GmaAffx.93392.1.S1_s_at	CF807760	At5g42500	6e-42	Disease & Defense			CACTGGGGCTTTTCGTTTTGCACGTGGCTACGCTCAAGCCAGATTTTACTCTGTTGATTTCACCAAAGGAGACGCTATCGTGGAATACGACGTATTCGTGAACCATTATTGAGATTTACTCCTTCCGTTTCGCAATAGTTACGGAGAATT
GmaAffx.93393.1.S1_s_at	CF808604	At3g09640	4e-74	Disease & Defense			TCTTGACATCGCTGTTAGGCTTTTGGAGCCACTCAANGCGGAGTTNCCTATTTTGAGCTACGCCGATTTCTACCAGTTGGCTGGCGTTGTTGCCGTTGAGGTCACNGGTGGACCTGAAGTTCCNTTCCANCCTGGAAGAGAGGACAANCCTGAGCCACCACCAGAGGGTCGCTTGCCCGATGCCACTAAGGGTTCTGACCATTTGAGAGATGTGTTTGGCAAAGCTATGGGGCTTANTGACCNAGATATCGTTGCTCTGTCTGGGGGTCACACTATTGGAGCTGCGCACAAGGAGCGTTCTGGATTNGAGGGTCCCTGGACCTCTAATCCTCTTATTTTCGA
GmaAffx.93558.1.S1_s_at	CF807323	At5g49040	3e-35	Disease & Defense			TACTGGCACGAAGTCTTCAGCGGAGAAAACCCCACATCGGTTAGAATCATTCCCNCACTCCCCAAATACAACNCAACCACAACCTTNGGNTCNGTTGGNATCTTNGACANCNCTTTAACNGTGGGACCNGAGGTNTACTCCAAGGTTGTCGGAAAAGCCGAGGGCTTGTTTGCCTCCACGTCNCAAACGCAGTTNGANCTNTTNCTGATTTNCAACTTCGCNTTGACNCAAGGGAAGTACAACGGCAGCACCATCACGTTCACNGGGAGGAGCCCCCTCTCGGAGAAGGTGA
GmaAffx.93164.1.S1_s_at	CF808889	At3g09390	1e-08	Disease & Defense			GGGAGAGCAAGCTTCAAGCAGAGATAGCCCTTAATTAGGAATAATGATAAACTATTAATGTGTAGCTAAAAACTTATGTATTATGTCTGTGATGGTTTTCGTGCACTCTGGTGTTT
GmaAffx.92986.1.S1_at	CF808711	At5g02790	4e-77	Disease & Defense			AACGTGTGTGGATCGCTAGGAACTACAAGGGGCTACAAGATAAGATCAATTTGGT
GmaAffx.92986.1.S1_s_at	CF808711	At5g02790	4e-77	Disease & Defense			TTGTACATCAGTTATTCTTGCCCCTATGCACAACGTGTGTGGATCGCTAGGAACTACAAGGGGCTACAAGATAAGATCAATTTGGTCCCTATTAACCTTCAAGACAGGCCAGCTTGGTATAAGGAGAAAGTCTACCCTGAAAATAAGGTGCCATCCTTGGAGCACAATGGCAAGGTGTTGGGAGAAAGTCTTGATTTGATCAAATATGTAGATGCAAACTTTGAAGGGACACCTTTGTTTCCCAGTGATCCTGCCAAGAAAGAGTTCGGTGAGCAATTGATATCCCATGTTGATACATTCAGCAAAGACCTGTTCGTTTCATTGAAAGGGGATGCTGTACAGCAAGCCAGTCCCGCTTTTGAATACTTGGAGAATGCTCTTGGTAAATTTGATGATGGG…
GmaAffx.92699.1.S1_s_at	CF808424	At4g11650	2e-13	Disease & Defense			AATAACTGCACCTACACGGTGTGGGCCGCTGCCGTGCCCGGCGGCGGCGCAAGGCTTAACCCTGGCGAATCGTGGAACATCAGCGT
GmaAffx.91091.1.A1_at	CF806816	At4g11650	1e-78	Disease & Defense			GAACCCAATAACCTCTTCTATTACGGACACTGAAATAAAAT
GmaAffx.90703.1.A1_at	CF809087	At5g05340	3e-80	Disease & Defense			TTGAGTCTCGAATATTAAGGGTCCTACTACACATACGCAAGCAATTTAATTGTGTTTAATAAGTTGTTAAAACATGTTTTGGTTGTGTTTTGGATTCCGTGGTGGGTTAATTTCCTAGTGTAGTTGCTGTTATCAATGCCGTATACGTTAGTGTGTGTTCTACTTCCCTTTATTTTTGTCTCTTTTTTACTTTTCCTTGACTATATTGTAG
GmaAffx.91200.1.S1_s_at	CF806925	At4g24190	2e-87	Disease & Defense			GAGGTTATTTTCTTCACGGATCCAGTTGATGAGTACTTGATGCAATACCTGATGGATTATGAAGACAAGAAGTTTCTTAATGTGTCCAAGGAGGGTTTGAAACTTGGGAAAGATTCAAAAGACAAGGAACTGAAGGAATCTTTTAAGGATCTTACCAAGTGGTGGAAAACTGCTCTTTCCAAAGACAATGTTGATGATGTGAAGATTTCCAACCGATTAGATAACACTCCTTGTGTAGTGGTGACATCAAAATTTGGTTGGAGTGCTAACATGGAGAGAATCATGCAGTCTCAAACTTTGTCAGATGCTAGCAAGCAAGCATACATGCGCGGCAAGAGGGTTCTTGAGATCAATCCTAGGCACCCTAT
GmaAffx.91208.1.S1_s_at	CF806933	At3g45310	5e-42	Disease & Defense			TGCAAATTCTCAGCTGAAAATGTTGCCGTTCAAGTCATTGACTCGGTCAATATCACCTTGGGTGCTGAGAATGAATTAAAACATGCAGTTGCATTTGTTCGGCCGGTTAGTGTGGCCTTTCAGGTGGTGAATGGGTTCCATTTCTACGAGAATGGAGCTTACACTAGTGACCTTTGCGGTAGCACTTCCCAGGATGTGAACCAT
GmaAffx.91396.1.S1_at	CF807731	At2g15220	4e-54	Disease & Defense			GTGCACGTTTGGCAGTGGAGTGGGAATGGTCGTGCT
GmaAffx.91442.1.S1_at	CF805736	At1g24020	3e-08	Disease & Defense			GGATATAGCTACAGCGTAGTGGGTGGTGCTGCGTTGCCAGACACAGCGGAGAAGATCACATTCCACTCCAAATTGGCTGCTGGTCCCAATGGAGGCTCTGCTGGCAAGCTCACTGTCGAATACCAAACC
GmaAffx.91508.1.S1_s_at	CF806158	At4g14710	1e-94	Disease & Defense			AGAACCCAAGGAGTTTGTCTCGTTGGACCAACTTGCTGAACTTGGAGTCCTTAGCTGGAAACTAGATGCTGATAACCATGAAAATGATCCAGAGCTGAAGAAGATTCGTGAAGAGCGTGGTTACACCTACATGGATGTTTGTGAGGTCTGCCCAGAAAAGTTGCCAAATTATGAACAGAAAATCAAAAGCTTCTTTGAAGAGCATCTTCACACTGATGAGGAGATCCGCTTTTGTGCTGCTGGAAGTGGCTATTTTGATGTTAGGGATCGCAATGAAGCTTGGATTCGTGTGTGGGTCAAGAAAGGAGGAATGATCATCTTACCTGCCGGAATTTATCATCGCTTTACGCTAGATGAGAGCAACTACATTAAGGCTTTGCGTTTTTTTGTTGGTGAGCC…
GmaAffx.91519.1.S1_s_at	CF807244	At1g29850	5e-24	Disease & Defense			TGAGTTGGAAGCAATCAGACAGAGAAGGTTGCAGGAGCTTATGGCTAGCCATGGTGGCGGAAATCAACAGAACCCTGAACAGGAGAAAGCTCAGGATGATGCAAAGAGGGAGGCTGAGGAACGGAGACAGATGATGCTTAGTCAGATATTGGCTGCTGAAGCGCGAGAAAGGCTTGCTCGAATTGCTTTGGTGA
GmaAffx.91568.1.S1_s_at	CF805995	At1g65870	3e-38	Disease & Defense			TCGTCACTGCCAGTTACCATCAAAGCATCTCTCCAAGCCTTCTACGTTCTCGTGAGAAGCTCACGCACCTTCGCTTCTATTTCCATGAAATTTTTACTAGCGACAAACCCTCTAATCTCGTGATCGACCCCCCCAAGGTGGTAGCCGACTCTCCCCTTCCATTTGGGTCCCAAGTGGTGATCGAGGACCCATTAACAATTGGGCCTGATGTCGAGTCCAAACAGATAGGTAAGGCCCAAGGGTTTTACCTATCCGCAACCCAAAGGCCCGGTTTGGAGTTGGAGATAGTCATGGGGATGGCCTTGACCTTCTTAGAAGGCGAATTTAACGGTAGCAGTTTAAGTGTGTTGGGGAGAAACAAAATCTTCAATGAGGTGAGGGAGTTGCCTATTATTGGTG…
GmaAffx.91674.1.S1_at	CF807399	At5g53560	1e-42	Energy			TGTATTTTTCATGTGTTGTGGCCTCTTGCTCAAGTTA
GmaAffx.91723.1.S1_at	CF805997	At5g40760	1e-153	Energy			CTTTGAAGCACTCCCACGGATGTGTATCAAGCATTTGGAACAATATAAGAGACTAAGAGTGTTTGGCACGGTTTGTG
GmaAffx.92392.1.S1_at	CF808114	At5g47030	2e-63	Energy			CCAGAAGGGTCTCCAAGAGTTCACTCAGAAACTGAACTCAGCCACAACTGATTTGGAGAAAGCTGAAGCTCAGATTGGGGNTTGATGTCCATAGNGCTCTNAACTCTGCTCTTNCAGGCTAATAATAAGTACTGTAGTGGTAAGTCTTTCCTTCTGTATTTGGTTATTTCCCCCCACTATGTGGCATTGATTTGTCTCGGTGTAATCAAAGTTGCTAAAAGAACATTTTCACCATGAAATTCTATGTTGAAAGTGACTTGAT
GmaAffx.91977.1.S1_s_at	CF807702	At4g02580	1e-119	Energy			TTCCATGGGAATTCACCGAGGCCAATCAAGCAAAGGTTAAGGAGATTTTGTCTCACTATCCATCCAACTATAAGCAATCTGCTACAATTCCTCTTTTAGATCTTGCCCAGCAGCAGCATGGAGGTTGGCTACCTGTTTCTGCAATGGATGCGGTAGCTAAGATTGTAGAGGTTCCTCCCATACGGGTGTATGAGGTTGCCACATTTTACTCCATGTTCAATCGAGCTAAGGTTGGGAAGTACCATCTGTTGGTTTGTGGAACAACACCTTGTATGATAAGAGGTTCACGAGGAATTGAAGAAGCCTTATTGAAACACTTGGGAGTGAAGCGCAATGAAGTAACACCAGATGGTTTGTTTTCTGTTGGAGAAATGGAATGCATGGGATGCTGTGTGAATG…
GmaAffx.91826.1.S1_s_at	CF808285	At1g65930	2e-70	Energy			GATGACATCTGTATTGGTTTGCCCTGATGGAAAGACTATTGAAGCAGAAGCAGCNCACGGCACAGTTACCCGNCATTTTAGGGTTCATCAGAAGGGAGGNGAAACCAGCACAAATAGCATAGCATCCATCTTTGCCTGGACAAGAGGGCTAGCCCACAGGGCAAAACTGGATGNCAATGCNAAACTCTTGGATTTCACTGAAAANCTAGAGGCAGCTTGCATTGGAGTAGTAGAGGCTGGGAAGATGACCAAGGATTTGGCACTTATTCTTCATGGATCCAANNNGCTTTCAAGGGAGCATTATTTGAACACAGAG
GmaAffx.92088.1.S1_at	CF807813	At1g51650	6e-29	Energy			GATTTTGAACTTATTGTCAAGTGGCTGTGTAACTTGAGTCTGCTTCTAGGTCCTGAAATGAGAAA
GmaAffx.93250.1.S1_s_at	CF808975	At3g06650	2e-95	Energy			GCTATGTGCCGACCATGGTCCTTGTGTCTCTGGTGCTCACAATACTATTGTGACAGCAAGGGCAGGGAAAGACCTAGTTTCCAGTCTCGTATCAGGTTTGCTAACAATTGGTCCTCGATTTGGGGGTGCCATCGATGATGCTGCTCGCTACTTCAAGGATGCTCATGACAGGGCACTTACTCCTTATGAGTTTGTTGAAGGTATGAAAAAGAAGGGAATTCGTGTGGCAGGAATAGGGCACAGGATCAAGAATAGGGACAACAAAGATAAGAGAGTTGAGCTGCTACAGAAGTTTGCACGAACACATTTTCCTTCCGTGAAATACATGGAATATGCTGTTCAAGTTGAGACCTACACACTCACAAAGGCAAATAATTTAGTTCTTAACGTAGATGGTGC…
GmaAffx.93110.1.S1_x_at	CF808835	At3g15640	2e-25	Energy			ATAAAAGGATAGTCGGATGCCCAGGAGGTGAAGGTGAGGATGAGCATGATGTTGTCTGGTTTTGGCTGGAGAAAGACAAGCCCCATGAATGTCCAGTGTGCGCACAGTATTTTGTTCTTGAAGTGGTAGGACCTGGTGGACCACCCGATGGACATGGTGATGATGATCACCATTGATTGCATCCTTCAATTAAATCTGG
GmaAffx.93557.1.S1_s_at	CF808765	At2g36530	1e-128	Energy			TGCCATATTGGCAGTGTCTCTTGCAGTCTGCAAAGCTGGTGCTNGCNGTCCTGAAANTTCCTCTTTACAAGCATATTGCNAATATNGCGGGTAACAAAAAGTTGGTTTTGCCTGTTCCTGCTTTCAATGTCATTAATGGTGGATCACATGCTGGAAACAAACTTGCTATGCAGGAGTTTATGGTTCTTCCNGTGGGAGCTTCCTCTTTCAAGGAAGCCATGAAGATGGGTGTAGAAGTATATCACAATTTGAAGTCTGTGATTAAGAAGAAATATGGTCAAGATGCAGTAAATGTTGGTGACGAAGGTGGCTTTGCCCCTAACATCCAGGAAAACAAGGAAGGTTTGGAATTGCTGAAAACTGCCATTGCCAAAGCTGGTTACACAGGCAAAGTTGTCA…
GmaAffx.93486.1.S1_at	CF806564	At3g04120	5e-31	Energy			GTGTACTGCAAAGTTGCTTGTCTAGTTGCGATTTAGTTTCTTGCTCGTGCAAAAAATGAGAGGTCTGAATAAATCGGTTTCTGGAACCAGTGGATTTACCTTGTTAGGAGCATTAGCTCTATTTTGGACTTTGCCTCTTGTGGAGGAGGATGGAGTTTTTGGATTTTTATATATTTGCTAATGTACTTGTCGTTATTGATTGTTATAGTAGATATTTGGCCGTCCTCTATTTTTCCACGTGGTTCTCGTATACTTGTCCATGTTAAGACAGATTCCAGTAATGACGTTTCGGTGGTTTATCGAAACTAATGGTTACAT
GmaAffx.89881.1.S1_s_at	CK605731	At3g51030	5e-40	Energy			GGCCCCAGTTCTTGCAGAGATTGCAAAGAAAACTCCTGAATTGATCTTCCTCAAAGTGGATGTGGATGAAGTGAGGCCTGTTGCTGAGGAATATTCCATTGAGGCCATGCCAACCTTCCTCTTCTTGAAAGATGGCGAGATCGTGGACAAGGTGGTTGGTGCTAGTAAGGATGACCTTCAAGCCACCATAGNCAAGCATGCATCTGCTGTTGCTGCTGCTTCTTCTTCTTGAAGTGAAGTATCATAATATGAAAGAAGACAAAGAATAATGCATTTTAATGTTTTCAAGTCAGTTTGNATGTTTTCTCTATGGACATTGAGTTGGCAGAACATCGAGTGATGTATAAAAATAAAATTGTTGCATTGTCTTTTTTTCGTATGATTAAATGNCAATTTAGC…
GmaAffx.90214.1.A1_at	CF805939	At2g47380	4e-20	Energy			CCGAGTGTGGTTAAGGAGATCATAATTGGAATAACACTTGGCTTAGCTGCTGGTGGTGTGTGGAAGATGCACCACTGGAATGAACAGAGGAAAACCAGGACCTTCTACGATTTACTGGAAAAGGGTGAGATTACTGTTGTTGCAGAGGAACAGTGAAAATGTTCTTGTTTTGTTGCCTATGCTCTCCATTTATAGGCTTTTTTTTCCCGTGTTATATTCAATTGGCTCTTCAAATGTAAATGAGCCAACATACTATGAGA
GmaAffx.80404.1.S1_at	BM085436	AtCg00670	6e-06	Energy			CTTGGGTTGATATATAGTGCGACTTGTCAGATATAGTAGGTCATATGGGATTTCCCCGTTTTCTCCCCCGATCGAGATATCCTCTCTTTCACCCCCAAAAGAAGAATGATTGAATCATAAAAAATTTGGAGCGTGAAGTGTAATGAAATAAANTNNTATCGATTTTTTTATTTTTAGAGGTGGTATCCAGATTATTACTCGAAATTATGAATAATTTATGGTTGGCTTGATTGAACCAATAAAATAAAGTACCCAGGCTCTGTTTAGAAAAAACCAATTGGTAATATATCTACGATCACCACTTCTATCATATCCGTATATTTTACAGAAAATATTAAATAAGAAATTCAGAAAAGGAAGAAGTTTTAACAAAAATACGTAGTATTGTAATATTTGTCC…
GmaAffx.75782.1.S1_at	BQ742018	At3g07480	1e-50	Energy			TGCGCGGCCCACTGCGAGGTCAACATNGCNCAGGAGTGGCTCGACAAGCTACCCCCTCGCTCCTACGACGAGGAGTACGTCCTCGTTCGCAATTCCCGAGCAAGGGTCCTCAACAAACACTCCAGGCTCGGATGCCAAGTTCTCCTCGACCNCGACCTCGAAGGTATGGTCGTTGCCCTCCCCGAACCTAGGCCCTGGGACACTTCCTAAGTCCGAACCTAAGCCAAGTGTTTATTTTCTTTTTTTGGCTCAATAATGTGATCCATGAACCTTTGGAAGCATAGCGGAACTCGGTGAACCTTGTATTGGTTTCTTCCTGTTGTTATATTTTGGGTGGTTTTAGACTCTTGTGCCGGTAATTGGCTCGCTATGG
GmaAffx.65693.2.S1_s_at	CA799713	At5g65690	1e-73	Energy			AAGGTGGTTGCTATGCCAAATGCATTGACCTCTCACGGGAGAAAGAGCCAGATATTTGGAATGCAATCAGGTTTGGCACAGTGTTGGAAAATGTGGTGTTTGATGAGCATGATCGAGAAGTTGATTACTCTGACAAGTCAGTTACAGAAAATACTCGTGCAGCTTATCCTATAGAGTACATTCCAAATGCAAAGTTACCTTGTGTTGGCCCTCACCCAAAGAATGTCATACTTTTGGCATGTGACGCATTTGGTGTACTCCCACCCGTTAGCAAGCTAAACCTGGCACAGACCATGTACCATTTCATCAGTGGATATACTGCTTTGGTGGCTGGCACA
GmaAffx.6490.1.S1_at	AW596567	AtCg00150	2e-73	Energy			TTAGTAGTTCCTATACCTGTCATGTTCCTTGGATTATTCACAAGCGGTATTCAAGCTCTCATTTTTGCTACTTTAGCTGCGGCTTATATAGGTGAATCCATGGAAGGCCATCATTGACCAGTTTTCTACAAAATANGTCCTTTTCGTTTAGCTTGCCGCACATATATTGCGGCTCAATATAATCTACTTAGTAAACATCTATATCTATCTACCTATATCTATATAGATATAGGTAGATAGATATAGATAGATATTCGATTAGCATATATTAGCATATATTAGTATATATTGGATATTCAAAAAAAAAANAANAAATAAAAAAATTAAGAGCCATAATTAGAATTCTGTATGATATTTACGTTTACGGCGTGTGATAAAAAGATACTATATAGAACTAAA…
GmaAffx.70836.2.S1_s_at	AI988244	AtCg00180	3e-28	Energy			CGTCTTCCTAGTTATATCGCAAATCTTTTAGATAAATCTCTAAAGGAATTAGAAAGTCTAGTATACTGCGATGTGTGATTTGATAAAAATTTTTTATTGTACAGATTCCGAATGAGAAACTGTCATTCCATTTAATTTAATTGGGATGCCCTGAATCTGACATGTCTCTTGGAATGAGTAACATGAAACTCAGAATTATGGATGTATTGAATACTCCCTAATAAA
GmaAffx.59019.1.S1_at	AW133348	AtMg00160	2e-73	Energy			AAGTCATCCCTACAATAGCCCCTTGTGATGCNNNNNAACCATGGCAACTAGGGTTTCAAGATGCAGCAACACCTATAATGCAAGGAATAATAGACTTACATCACGATATCTTTTTCTTCGTCATTCAGATTGGAGTTTTTGTATCATGGGTCTTGCTTCGTGCTTTATGGCATTTCAGGTCTAAAATGAATCCAATCCCTCAAAGAATTGTTCATGGAACAACAATCGAGATTCTTTGGACCATATTTCCTAGTGTCATACTAATGTTCATTGCTATACCATCGTTTGCTTTGTTATACTCAATGGATGATATTGTAGTGGATCCAGCCATTACTATCAAAGCTATTGGACATCAATGGNATTNGGACTTATGAGTATTCAGACTATAACAACTCTGAT…
GmaAffx.41477.1.A1_s_at	BM270428	At1g12230	6e-16	Energy			GGCCTGCAGCTGTGCAGCTTCTGGCTGCTGGACTGGATGGCCATGCTGATCAAGCAAAGCGGGTGGAAGAGTTATTTGAGAAAATTTGGCCACCACCTAATGTATGATTCGACTTCTTTATGTCGCACGAGAGTCTTTTGCCTGATGGATCAATAAACATAACACACAACAGATGAAGGGAATATTCCATTGTTTTTCTTTCCCTCTTAACCTTGAATTCTTGAACAATTTAGCACGCGGTTCCTAAATGCACATTTTG
GmaAffx.34569.1.S1_s_at	AW306183	At5g25450	5e-10	Energy			GAAGCATTGGGAGGTTTGCCCCTATATCAACGATCCATTCCTTGAGTGCATCAAGTATTTCATGAAGGTATTTTGATTGGAGTGGGAGGGTTTAAATTGTATTGATCTTGTGGTAAAATGTTTTCTTATAAGAAAAAAATATGGACAGCTTTGTTGGTATAAACTTATATGGAATGCATTTTTTAATGGTATAAACTTGCCTCGGGCATTTTCTAATAAATGGCAACAACAGACTTTT
GmaAffx.13837.1.S1_at	BI426968	AtCg00670	7e-90	Energy			AAATTTATGGTTTCGATTGGTGCAAACCCAATAGTCTTNATTTACAATTTAAGATGAGAAGGACTTTCCCATCGGTAACAAAACAAATATAAAGTTACCCGTTAAGCGGAGAAAATACTATTTCAATTAAAGATAAAGTATGTCCTTAATGAATGAATTTTGATGGATTTTGGACGAACGGAATAAGAAGGTCAGCTACCCAGCAAATTTTCATAATTAAATACCGTTACTGTATAACTAGATTTCATTGTGAAAAAATCTACTTACTAAACTAAATATTGGATGGGTAGAGCCAAAGAGTGTGAACTGTACAAGTTAACAATAACATTAATTAAATTAATAAAAAATGAAAAGAAAGAAAGGCTCCGGTGTATAGAAAGGACCTGCCCGTTTCTAAAA…
GmaAffx.1301.38.S1_at	CA802260	At4g30210	0	Energy			AGGGATGTACACCGCGCCCTGCACACAATTTTGCAAGAGCAGGGTTCTCTCGATAGTTCCAAGG
GmaAffx.1301.38.S1_x_at	CA802260	At4g30210	0	Energy			AGGGATGTACACCGCGCCCTGCACACAATTTTGCAAGAGCAGGGTTCTCTCGATAGTTCCAAGGCTGAGAGCATGGTAAAGAATCTACAAACTACTGGCAGATATTTGCGCGATGTATGGTGATGATATCTGAATGCAAGCCGTGGGGGTGACGAAGATATTAATAAAACATAGAGTTGTGGCTAGAGGATTTTGAAAGGGCCTTATTTGTGCCACCTTTCATTAGTGCCCTCAAAATTGAGGGGGGGCGCTTGTTGCCATCACGACGACATTTCCTACGATTCTTT
GmaAffx.26088.1.S1_at	BI970414	At5g65750	2e-42	Energy			TCAAGGTTCACCAGAAGGAGCAGACTGAGATTGCTGAAAAAGCCNTTCAACANGAACCNATCGACTTCCCATTTTGAAAANNCNTTTGCACATGCATCCATCTTTTTTGAGAGTGATAATAATGCATTTAGTTTAATTTATCCACCACGTAAGNNGCTATAGTTGGAAGGAAGGNGACNTCATACATTTGCTTTCNAGTTTTGACCTTTTNTNATNTTNTNNNGGTTCCTTNCAAAAAGTNNGNTAAGCTGAATTTCAACATNCNTATGCTGAAANTATTTNTATTTCCTTGNNNCGATANGCAAAGGCGTGGTTGNCTTACTNGNTGAATTGATGCCNNNNNNNNNNNNNNNNNNNNNNNNNNNNNNNNNNNNNNNNNNNNNNNNNNNNNNNNNNNNN…
GmaAffx.30142.1.S1_at	AW311191	AtCg01100	4e-30	Energy			TATCTCTATTCCATACATATTCGTTTCTGACTTTTTTGAAATAAATCAAACATATGGAGTTTTTGTAACGATAATTGGTATCTTTATTACACTAGCTAAAACTTATTTATTCTTATTCCTTTCTATCGCAACAAGATGGACTTTGCCTAGGCTAAGAATAGATCAATTATTAAATCTTGGGTGGAAATTTCTTTTACCCATTTCTCTCGGCAATCTATTATTAACAACTTCGTTTCAACTGTTTTCACTG
Gma.8941.1.S1_at	BU764086	At4g36750	8e-05	Energy			GCAAGTATATGGCTGTTGTAGTCAAGAAACTCGCCCAGTCATGAATGGTGTTTTCTTCATTTCATTCTATTCTTGTTTGATTATCTCTGTATTTTTTGACCGTTCTTTTTGTCAAATTGGTTCTAGCATTTTACCATTGCATTGTGATGACTGGTGAGGAACGGCAGTTCTGTTACACTATCGATTCTGTTGGGTTGGGGATTCCCATGTTGGGTTCTGCTTTGTTTCTGGAAGGTGTAGATGTTCGTAAATTTTCGTCAT
Gma.8709.1.S1_at	BU765404	At4g36750	3e-60	Energy			ATGGCTTGCTGTTTGGTTTTCCAACAAGGTATGGCAGCATGGCGGCGCAGATGAAGGTGTTTTTCGATTCGACCGGTCAGTTGTGGAGAGAGCAGAAGCTGGCAGGGGTGCCTGCTGGCTTCTTTGTCAGCACTGGCACTCAGGGTGGAGGCCAAGAAACCACAGCTTGGACAGCAATCACACAGTTAGTCCACCATGGTATGCTCTATGTTCCTATTGGTTATACCTTCGGTGCTGGAATGTTCGAAATGGACTCGGTCAGAGGTGGATCTCCATATGGTGCTGGAGTTTTTGCTGGCGATGGATCAAGGCAGGCTAGTGAAACAGAACTGGCCCTTGCTGAGTATCAAGGAAAGTACATGGCCACAATAGTCAAGAAGTTAGGCCAGAAAAGCTAGT…
Gma.9838.1.S1_at	BF595182	At3g51030	2e-48	Energy			GAGGGACAAGTCATTAGCTGCCACACCGTTGAAGAATGGAACGATCAACTCCAGAAGGGCAACGAATCCAAGAAACTCATTGTTGTGGATTTTACTGCTTCTTGGTGTGGACCATGCCGTTTCATTGCACCATTCTTGGCTGAGCTGGCTAAGAAGTTCACAAGTGTCATATTCCTAAAGGTGGATGTGGACGAATTAAAGAGTGTTTCTCAAGATTGGGCTATTGAGGCTATGCCCACTTTTGTGTTTGTGAAAGAGGGAACGCTTCTGGACAAAGTGGTGGGAGCAAAGAAGGATGAGCTGCAGCAGAAAATACAGAAACATGTGGCTTCAGCTAGTGCTTAATCTAGCTCACCTTCAGAAACTTTATATATGCGCTTTCTTTTCATAATCTTGTAC…
Gma.8119.1.S1_s_at	BU548381	At3g51030	2e-40	Energy			GGCCCCAGTTCTTGCAGAGATTGCAAAGAAAACTCCTGAATTGATCTTCCTCAAAGTGGATGTGGATGAAGTGAGGCCTGTTGCTGAGGAATATTCCATTGAGGCCATGCCAACCTTCCTCTTCTTGAAAGATGGCGAGATCGTGGACAAGGTGGTTGGTGCTAGTAAGGATGACCTTCAAGCCACCATAG
Gma.8119.2.S1_at	CD410224	At3g51030	3e-41	Energy			AAACATGGCTGAAGAGGGTCAGGTTGTCGGCGTCCACACCGTTGATGCGTGGAACCAGCAACTGCAGAATGGAAAAGACTCCCAAAAATTGATTGTGGTGGATTTTACTGCTTCCTGGTGTGGTCCATGCCGTTTTATTGCCCCAGTTCTGGCAGAGATTGCTAGGCATACTCCTCAAGTGATCTTCCTCAAGGTGGATGTGGATGAAGTGAGGCCTGTTGCTGAGGAATATTCCATTGAGGCCATGCCAACCTTCCTCTTCTTGAAAGATGGCAAGATCGTGGATAAGGTTGTTGGTGCTAAGAAGGA
Gma.6660.1.S1_s_at	AW348858	At4g10040	5e-55	Energy			ATATCTGAGAGAATCCACTGCACAGTGATTATACATTTTCATACATTCAATTTTTGCAGTGTGCTTTCAAAGTTCTGGAGATTTAATTTTCGGTCATTTAGTTCTGCCATGCAGGAAGTGCTGTATCTTTGGCAAATAATGTAGGCTACATTGGTCTACAACGCTATTTTGTTCATTTTGCATTGCCTCTAAAAAAAACAGCCGAATATTGGCTGGTGTAACAAATTATCTCTTTA
Gma.7436.1.S1_at	BU547698	At2g02850	2e-36	Energy			TTTGCTTCTTGGTGCTTCAGTCTGAGATGGCTCGTGCTGCCACTTATAGAGTTGGAGATTCTAGGGGTTGGACCTTTAACACCGTTACCTGGCCCCAAGGAAAACGCTTTANGGCAGGTGACACACTTGCGTTCAATTATAGTCCTGGGGCTCACAATGTGGTGGCGGTGAGCAAGGCTGGGTATGATAGCTGCAAGACACCAAGAGGAGCCAAAGTGTATCGGTCAGGGAAGGATCAGATCAGACTTGCTAGGGGACAAAACTACTTCATCTGCAATTACGTTGGTCACTGCGAGTCTGGGATGAAAATTGCCATCAACGCTGCATGACTTTCTTCTCTACTCATACGCATCTATTCTAACGCAAACTGCACCCCTTTAGTGGGAATCAACTTGTCTC…
Gma.7397.1.S1_at	BI970483	At2g20360	7e-66	Energy			GATATGTGAAGGTGCCTTTCCCCATTGCAAAGGCATTGGCAACACCAAGAGAAATATTACTAAACAAGGTCCCCTTTCCACTACCTGTTCCTGAGATATTAAATCTGGATAAGATCCAGGCTTTGACTACAGATACCGTTGTTTCAGAAAATGCTTTGACTTTCAATGATCTTGGAATTGTTCCTCACAAGCTGAAGGGATACCCTATTGAGTTTCTTATCTCATATAGGAAAGGAGGCCCACAATTTGGTTCTACTATCAGTGAAAGGGTCACTCCAGATTCTTGGCCGTAAGATTCTTTGGATGTTTGATCCTGAATCATTTTTCTGTCTTGCTTGTACTACCACCATTTAATTT
Gma.7412.1.S1_at	CD412844	At1g75630	3e-58	Energy			ATTGCGGTTATTATCAGCACTGGGATAAACCCAAAGGCTAAGTCTTACTATCTCTTTGATGGATATGCTCATTTGTCCTCTGGCCTTGCCTGTGGCCTAGCTGGCCTCTCTGCTGGAATGGCCATTGGGATTGTTGGTGATGCTGGTGTCAGAGCTAATGCCCAGCAACCGAAGCTGTTTGTTGGCATGATTCTTATCTTGATTTTCGCTGAAGCTCTTGCTCTGTATGGCCTCATTGTGGGTATCATCCTCTCATCTCGGGCAGGCCAATCTCGTGCCGATTAAA
Gma.7097.1.S1_at	BG047373	At4g02620	4e-56	Energy			GACAAATTACCTCATTGTGGATTCAAAAACAACNGTCAAACAAATTGAGGATGCATTCAAAGAATTTACAACAAGGGAGGATGTTGCAATTGTGCTGATTAGCCAATATGTTGCAAATATGATAAGGTTTTTGGTTGATAGNTATAACAAGCCNGTTCCTGCAATACTTGAAATCCCTTCTAAAGANCATCCTTATGATCCNGCACATGATTCNGTTCTGTCACGAGTGAAGTATCTCTTCAATACCGAATCAGTTGCATCTGGGAGACGCTGAATTCACCNTTTNCAGTTGCAGCTTTTTGGGGGTGTTTGTTGTTTTTCTTTGTACANTATGGNTAATAATCTTTTCTTGAAATTCAGAGTTCTATGTAGATGTAGCTTAAATAATTTGTGCTGTCT…
Gma.6258.1.S1_at	AW349094	At5g25450	4e-36	Energy			CCGAAGAAGAACTGGTTCGCCGCTCAGCACATGAAATCCCT
Gma.6258.1.S1_s_at	AW349094	At5g25450	4e-36	Energy			GACGATTTGTACGATCCTTACTACGATCTNGATGTGAAGGAGGCGCTGAATCGGCTTCCGAAAGAGGTGGTGGACGCTCGCCACGCGCGTCTTAAACGCGCCATCGATCTTTCCATGAAGCACGAGTACCTCCCTGACAATCT
Gma.6160.1.S1_at	CD397751	At3g52730	6e-26	Energy			AGTGGTGAATCGAATCTGCAAAGATGGAAGCTGTTTCTCGAAGAAGAGGTGGAGGCATTTTCGAAAGCCTCTACAAGGTCGTTATGCGTCGCAACTCTGTCTACGTTACCTTCGTCATCGCTGGCGCCTTCCTCGGAGAACGGGCTGTAGATTATGGAGTCCACAAGCTCTGGGAGGCTAATAATGTTGGGAAACGATATGAAGACATTCCTGTGCTAGGGCAAAGGCAGTCAGAATAGTGACCAGCTTGTTAGCCATTTTGAAGTTTTATTATTTTCATGAAAATTTGAAGTGATTAAGAGCTGGAAGCAGTTTCCATTTCTACAATAAATACCATATGCTTGTCTCTTTCAGGCTTAACTCTTATGCGTGGTTTCATTTACTG
Gma.6160.1.S1_s_at	CD397751	At3g52730	6e-26	Energy			GTAACCCTAGAGTGGTGAATCGAATCTGCAAAGATGGAAGCTGTTTCTCGAAGAAGAGGTGGAGGCATTTTCGAAAGCCTCTACAAGGTCGTTATGCGTCGCAACTCTGTCTACGTTACCTTCGTCATCGCTGGCGCCTTCCTCGGAGAACGGGCTGTAGATTATGGAGTCCACAAGCTCTGGGAGGCTAATAATGTTGGGAAACGATATGAAGACATTCCTGTGCTAGGGCAAAGGCAGTCAGAATAGTGACCAGCTTGTTAGCCATTTTGAAGTTTTATTATTTTCATGAAAATTTGAAGTGATTAAGAGCTGGAAGCAGTTTCCATTT
Gma.62.3.S1_at	BE658575	At3g14940	4e-15	Energy			TTGTTCTCAGATACACTTTTTTTGTTTTGTTATTATGTTGCCCCACCTTTCTGTACAATTTGGTATGCTGCTCTAGAATTCCAGAAGAGCTAGCTACCACACAAATGAATCAATGACATTGATCTGTTATGTTTCTTATGCTTAGTACCGTTACTACACCCTTCTATACTTCTTTGTATC
Gma.62.3.S1_x_at	BE658575	At3g14940	4e-15	Energy			TGCAGAACACTGGTTAAGTTTGTTTGAATACTGAAAGTGAGTGCTCTAGTTTTGTTCTCAGATACACTTTTTTTGTTTTGTTATTATGTTGCCCCACCTTTCTGTACAATTTGGTATGCTGCTCTAGAATTCCAGAAGAGCTAGCTACCACACAAATGAATCAATGACATTGATCTGTTATGTTTCTTATGCTTAGTACCGTTACTACACCCTTCTATACTTCTTTGTATC
Gma.6556.1.S1_at	CA782240	At3g51030	1e-41	Energy			TGCCCCAATTCTTGCAGAGTTTGCTAAAAAGTTGCCGAATGTCACCTTCCTCAAGGTGGATGTGGATGAATTGGAGACTGTTTCCAAGGAGTGGGGAATTGAGGCTATGCCAACCTTCCTGTTCTTGAAAGAAGGCAAGCTGGTGGACAAGGTTGTGGGTGCCAAGAAAGAGGAGCTGCAATTGACAATAGCCAAACATGCCGCAATTGCTGCTGCTTGAAGTGCCATATGAATATGTTAAGAATAATAGACTATTGTCTTCGAGTCAGTTTGCTTTTATTACTATTAATCTGTTATTGGGTCTGTTTGCATGATTTCAGAACGGATTTAGAGTTAGTAAAACATGGATGGGTTATGTGTAAATGAAATTGTTGCACTATCGTGATTGAAACATTTCTGC
Gma.5505.1.S1_a_at	BI942102	At1g13440	1e-149	Energy			AAACTTGTTTCCTGGTATGACAACGAATGGGGTTACAGTTCCCGTGTGATTGATTTNATTGNCCACATTGCATCCGTGGCTTAAANANTTGAGNCTGANCTTGGATATCATCGCTANACCGTTCCAAATTTTTATCTTAATCGAGTTTATTTTAGTGTGAATTCGGAATAAACAC
Gma.5505.1.S1_at	BI942102	At1g13440	1e-149	Energy			GATGATGTTGTGTCTACTGATTTTGTTGGTGATAACAGGTCTAGCATATTTGACGCCAAGGCCGGAATTTCTTTGAATGANAACTTTGTAAAACTTGTTTCCTGGTATGACAACGAATGGGGTTACAGTTCCCGTGTGATTGATTTNATTGNCCACATTGCATCCGTGGCTTAAANANTTGAGNCTGANCTTGGATATCATCGCTANACCGTTCCAAATTTTTATCTTAATCGAGTTTATTTTAGTGTGAATTCGGAATAAACACTTTGTGTTGCTGTGAGAGATATCATTGAAAAACAGTGCAATATGTTGAGTTGGTAGACGGCCTTATAGGTTTTTCCTCTCGTAAGGGACGATTGACTATTCTGTTTCGTTATCATAATCATCTAGTA
Gma.5584.6.S1_s_at	BG047114	AtCg00630	6e-17	Energy			TTGTTATTTTGGAATGTACCGGTTGNGATAAAAAGAGTGTTAATAAGGAATCAACGGGTATTTCTAGATATATAACTAAAAAGAATCGACAGAATACGCCTAGTCGATTGGAATTGAGAAAATNTTGTCCNCCGTNGTTGCAAACATACAATTCACGCANAAATAAAGAAATAGATCAAATTGATCGCTTGTGTGTTACCCTTCGAACCAA
Gma.5672.4.S1_at	CD396011	At1g75630	4e-47	Energy			TATGGCCGGAGTGTTGGGAATCTACGGCTTGATCATCGCCGTCATCATCAGCACCGGNATTAACCCTAANGNCCAAATCCTATTACCTCTTCGACGGCTACGCTCACCTCTCCTCCGGCCTCNCTTGCGGNCNTNGCTGGCCTCTCCGCTGGCATGGCCATTGGCATTGTTGGCGANGCCGGTGTTAGAGCAAATGCCCAACAGCCAAAGCTTTTTGTTGGGATGATTCTCATTCTCATCTTTGCTGAGGCGTTGGCATTGTATGGACTCATTGTTGGCATCATCCTCTCTTCNCGTGCTGGCCAATCCAGAGCTGATTAGTATAAAATTTCCTGTTNNNTGCNGCGCACAGAACCATGAATTGGANGGTGAATGTCGCCGGGGACTAGGTCATGTTAA…
Gma.5706.1.S1_at	BI967978	At4g02580	1e-126	Energy			TTTGTTAAGTGAGCCCAAGCCTCCTCCCTGCCGTGACCTGGATTCCTGCTGAAGTGTNNTATACTTTTTGCCTTCAATAATGTGAGGCTTGCATGTGTTGGAGCTTGCCTTAATTGAAACATTGTCAGATTGTTAGATGCTCAACCAATTTTTGTATCAACCGTCCTGGATGGTTTCCATTTCAAAAATTTGTTCCATAATCGCCATAAATTTCTTGGCATGTTCATTACTTACCAGCGTTATCTATGTTTTTCTGTACTCTGTACATTAATCACCATGAACGAAATTTGAGGTTACNNTGAAATACNATTTAGTTAAGAAGTGAANTGCGTGGCATGCATNANNNANNNNNNNNNNNANNANNNATTTATCAACAATGGTATGGGAGAACAATCATGT…
Gma.584.3.S1_at	BE610674	At5g09600	7e-23	Energy			CTTCGACCCTCTCAATTTTCAATAGAATTGCTGGAGCTTTCCTAGCCGGTGTCATTTTGCTTTTTTATATGATCTATATGAAATTGGGTTTGGTTAGCCTCACCTATGACTCTTTCTACCAGTTCATATTTTATTCATCAAAACTCAACCTGCTTGTCATGGAGATTTCTGCCTTAGCCGTGTCCTATCATCTGTATAGTGCAATTCGTCATTTATTCTTATGATTAGAATCAACAATTGACACCTGAACTGTACGTTTGAACCTGAGGTGGAACTTTGCATAATTCGACCTTGGAGGCATGCATCCATATGTCTGTCAGTCATAAGGAACTTCATTAAGAAATGTGAATTTGCTTTATTGTAGTTATGTATTATTGACTTAATAATTACAATTCTGGC…
Gma.5427.1.S1_at	BM091753	At1g15690	0	Energy			TTGGGCCCGAAAGGATCTGAACCGCACAAGGCAGCTGTTATTGGGGATACCATTGGAGACCCTCTTAAAGATACTTCAGGCCCTTCACTCAACATCCTCATCAAGCTCATGGCAGTTGAGTCGCTTGTCTTCGCACCATTTTTTGCCACTCATGGTGGTCTGCTTTTCAAGATCTTTTGATTTGAGGGAATGCAACCGTACTTAGGGTAGAGTTTTCTATCAATTTATCCTATTTTTGTCGGAGCCTGCAGGCATTTTTCTTTTGTATCAATACCCTCTCCACCTTTAGGGGTAGCTCTTCAAATTATCAGGACTTGAAATTTGTTACCAAATGTAGTAGTAGTTTTTGCCAAAGTGAATTTTCAATTAACCAGCTTTTGGACTTTTCATCGAGTTTTT…
Gma.5057.1.S1_a_at	AW310849	At5g13440	1e-103	Energy			GATAGAGTCAAGGACCCAGAATGGCTCATTGT
Gma.5057.1.S1_at	AW310849	At5g13440	1e-103	Energy			TAAAAGTGGTTCTGCATTCAAGTGGGATGAGTTTACAATTTATTNTTTAAAAATTTATTTGGACAATGTTACAATGCTCCTTTTGGACGTCGTTTGCCCTCAAGTTCTTGTCGGGTATGTTTAGCAAGTGATTTATGTAGCTTCGAAATTGTAACTGTTACCCTTCGGCGAGCTTATACCAATAATCGCCTGACGTTTACTTAGCATATTGGTGATGGCTTCAAGAATATTGAAGTGTGCATCATGTATAAACATT
Gma.5057.2.S1_a_at	BE475334	At5g13430	1e-70	Energy			GATAGAGTCAAGGACCCAGAATGGCTCATTGT
Gma.5057.2.S1_s_at	BE475334	At5g13430	1e-70	Energy			TTACAGGTGGTAGGTTTGCTTATGCCTCTTTGGTCCGTCTCCTTGTCCTCAAGTTTGTGCTTAGCATGTCTGCCAGTAAGGATGTTCTTGCTCTGGCTTCACTTGAGGTTGA
Gma.5057.3.A1_at	CA935008	At5g13430	1e-27	Energy			ATGGTTCTGCATACAAGCGGAATGAGTTTACAATTTCTTTTTTTAAAATTTATTTGGATTACAATGCGCCTTTCGGACGTCTTTTACCTTCAAGTTCTTGTTGGGTATGTTTAGCAAGTGGTTTATGTAACTTGGAAATTGTAACTGTTACCCTTTGGCGAGACTTATATCAATAATCGCCTGACTTTTAGTTAGCATATTGTCGACGAGTTCA
Gma.4918.1.S1_at	CA819981	At1g16700	1e-92	Energy			ATGGCAGCCGCAGGACAACTCGGTATGATATTGACATGACCAAGTGCATNTATTGTGGATTTTGTCAAGAGGCATGCCCTGTTGATGCCATTGTCGAAGGACCAAACTTTGAATTTGCTACTGAGACTCATGAGGAGCTTTTATATGACAAGGAGAAGCTGCTTGAAAATGGGGACCGATGGGAGACTGAAATTGCAGAGAACCTGAGATCTGAAAGCCTTTATCGCTGAAATTTTCCATGTGATCCTTGCCTGTTGCTTTTTCCGTCTAATTGGGCAATGATAAATAAAATGACCAGCGCATGATTTTAAAGAACTGTATGCATACACGATTGTTACATCAGTT
Gma.4819.2.S1_at	AW597363	At2g36530	1e-175	Energy			TGGTTCTGCTGCTGTGTATGCTGGTGCCAAATTCAGAGCCCCCGTGGAGCCCTACTGATTGTTTAGCCCAAGATTACTAAGCATCATTTAAATAAGATTCTATTGATGACTGCATAGGACATGTATTTTTTGCGAAAAATAAACTTGTCTACTACTTCAGAGAATATAGGTTTTCCGGGCGTGGAATTTTGAAGCGAGAAAATAAGGCAGTAGATGTATGCCTGATGCCTAGTTTATTTGAAATCTAGCTTTAGGGGGTGTTTGGTGCGACAAATTGTTTTCCAGAATCATAA
Gma.4612.1.A1_at	CD404099	At3g22960	4e-54	Energy			TTTCTTTTGAAAGCCAACATTGCTGCTTGTTCAAAACCTGGGATGCTGCTAGAGTGCTAAAATGGGGCAGAGACTACATGAATGAATTTTGTTCGTTCTGTCATTTTAATTTATAGGACACGACAGAAGTTTGGGAGAGTTAATATTATGGCCTTGAAGTTCTTAGTTTTAATGCATACACCTTCAAGCTCTAGATATCTTTTTTAGTCGAGTGAGGCAATAGTGTAATAGCTACCCTTTTAAGTTGTAAGGCACACATTTGCATTTTCCATGTTTTATATCATTGCATTAGCTTTCCACTTCAATGTTG
Gma.4509.1.S1_at	AW433213	At3g51030	5e-21	Energy			GTAGCATGATTTGTGATTCCTCTAAATATTTTCTTCCACCGATTTTAANNANNNNNTNAANANNGNANNANANTNNNAGAAATTGATTGTGGTGGATTTTACTGCTTCTTGGTGCGGCCCATGCCGTTTCATTGCCCCAATTCTTGCGGATATGGCTAAAAAGTTGCCGAATGTCACCTTCCTCAAGGTGGATGTGGATGAATTGGCGACTGTTTCCNNNNNNNGGGAAGTTGAGGCTATGCCAACCTTCCTATTCTTGAAAGAAGGCAAGCTGGTGAAGAAGCTTGTGGGTGCCAGGAAAGAGGAGCTGCAAGACATAATAGTCAAACTTGCTGCAATTGATGCTGCCTGAAGTGCCATATGAATATGTTGAGAATAATTGACTATTGTCTTCGAGTC…
Gma.4327.1.S1_at	CD414299	At5g56350	1e-178	Energy			TTGAGTGCAGCTTCTGCTAGAGCTTCTCATGCTGAAACAACNGAAGAAGCAATAGAATTCGCCATGCAACATGCCAAGTCCAAGGGTCTCTGCCACAACGGGGATTCNGTNGTGGCACTNCATCGTGTGGGCACTGCNTCTNTCATCAAGATCTTGACTGTGAAATGATCACCCCNATTACANGGAATTCTTCTGCTGTTTNTGGCAAATTTTTTNGATGGTGCAAAAGAGGTCTCGNTATACCTCTTCATATCTACATTGGATGCAAACTTCAATNAAAAGCATTTATTAGGATCGGTTACCTGTTTTTCACATATCATATATTACTGGTTTTTTTTTTTTTNGTTACATTTGCCTTATCATTGTGGCGAGNAGCCACNTGNTTTCATTTGTTAAGAT…
Gma.4356.1.S1_a_at	BI942101	At5g11770	2e-82	Energy			GTCTCAATGGGAAGTTGTGCTAATGGAGGAGGATACTACCATTACTCTTACTCCGTAGTTCGGGGATGTGACAGGATTGTTCCTGTTGACATATATATTCCAGGCTGTCCTCCAACTGCTGAGGCTTTGCTGTATGGACTCCTCCAGCTGCAGAAAAAGATCAATAGGCGCAAAGACTTCCTCCATTGGTGGACAAAGTGAGGTCGATTCAATCTATTTTCTTGGCATCGAAGCTATTTTATAATAAGCAACTACATGGTAGTTTACCTTGCTAAGAAGCAC
Gma.4359.1.S1_a_at	AI794712	At1g11530	7e-38	Energy			AAATAGACTCTCAAAAATCATGGGAACACCACATCTCTTATGCTACCAATCAAAAGTACCCTATTGTAGTTCATTTCTCTGCTTTCTGGTGTGTCCCTTCTTTAGTTATGAATCCTTTCTTTCAAGAATTGGCCTCCACTTATGAAGATGTTTTGTTTCTGACGTTGGATGTGGATGAGGTTAAGGAAATTGCCTCCAAGATGGAAATCAAAGCCATGCCCACCTTTCTGTTGCTGAGTGGAGGGACTCCTGTGGACAAAATTGTGGGTGCAAATCCTGATGAAATTAGGAAAAGGATTGACCATTTTGTTCACTCAACTCGTTCCTAGAACTTTTGTTCATTGTGCTAGGAAGCATTTCATATATGTTTTATATTCCAAAGTAATATTTATACGGGTT…
Gma.3774.1.S1_at	BU550698	At1g60420	1e-78	Energy			GTCTTCCGGCATTGGTGTATCATGAAGGGCACCGCCATGATCTGAATTTGGTGTCTGATGGAAACGGTGGAGGGCCCTTTATTTGCTGCGTATGTGATGAGCAAGGGTCTAGTTGGGCCTACCAGTGTCTCCAATGTGGCTATGAAGTGCACCCAAAGTGCGTCAGAACTGTGGAACGTCATGACAATAATGTCTAGGAATTTTTTAATTAAATTCCTGTGGCAATTAATTCTATATCCTGTGTTACCGTCCAAGAGGGGCGATAACTTGACTTGGCTGTATCCTAATCTGCACCAGGGAAGGGACTGGAATGCCCTTTAGATAAATTAGATTACGTATCTTTATGGTGCTTTTCTACTTGTTCAGAATATGTGTGACTGAGAGTCATAAGAAGGAAAG…
Gma.3969.1.S1_s_at	AW349494	At2g02850	5e-38	Energy			AACGACCCACAATGTGGTTGCTGTGGACAGAAGTGGATACAACAGCTGCAAGACACCAGGGGGTGCTAAAGTGTTCAGTTCAGGGAAGGACCAAATCAAACTAGCAAGAGGGCAGAACTACTTCATATGTAACTACCCTGGTCACTGCGAATCTGGGATGAAAGTTGCCATTAATGCGCTGTGATATACTAGTAGTGCTCAATACTTCTTGAAATGAAGTAACTGTTAAGTTAATGGTCAATTAACTAGCATTAGTAAATGTTAGTGTGTGATATTGTATGTAGTCTTTTTTTTATATGAAGCTGTTATATATATTAATTACTATAGTTTGTGAAGCAAGTGGGAGTGAGCTGGCTTGGTAGATCAATTGTTCCTGTATTTGGTATGTGTTGTGTGGTG…
Gma.3969.2.S1_at	CD412522	At2g02850	3e-37	Energy			GTTGCCATTAATGCAGTGTGATGGTGCTTAATACTTCTTGAGTTGAAGTGAAAATTAAGTTAATGGTCAATTAGCTAGCATTAGTAAATGTTAGTGTGTGCTCATGTATGTACTTTTTTTATATGAAGCTGTTATATATATTTATTAATCACTATAGTTTTGTGAAGCAAAGTGGGAGTGAGCTGGCTTGGTAGATCAATTGTTCCTATGTTTGGTATGTGTTGTGTAGTGGGAGTATAAAAATGGTCCATTAGTCACGGGCTCTTCTTATTAGACATTGGATCTACATATTTTGAAGTTATTGAAAGTCTCAGAGCCAATNATCTGTATCTGTGTGTCGGTGTCACAGTGTATGGTTCTATTACTGATTTTGTTTGCTTCAATA
Gma.3253.1.S1_at	AW348452	At4g17260	1e-145	Energy	Glycolysis		TACTGTTAGTGTTAGTTCCTGCCCTCTTCTTGCAGTGCAAGTGTTTTTGTTGCGTCAAGTGCTGGCTGGATCTCGTGAGATGTGTTTTGTTTCCTGTATGGTTTTAATTAGCCAAGTAAAATTTCATATTTCTGTANNNNNNNNNNNNTGTGCCTCTATTCAGTCAATTACGGAAAAAGATCTTCATTTCTTTTTCTTTCCATTTCTATGATTTTAGAAAAAATAATGATACTCTCCTATTAATGTGTATCATGCCAGTTTCATTTATTTGTCCAAAATTTGAGTAATGGAAGAAACAGAGAGGATCTTAACCCGTGAATAACTCAATGGTAATGCGGCACATCGAATAGGTGCACA
Gma.2987.1.S1_at	CD393690	At1g14450	1e-19	Energy			GGGATCTGGAAGTGGAAAACACACTGGAGAGTTCTTCAGGAGAAGGGATGCATGGAGGAAGCATCCGATGCTCACCAATCAGCTCCGCCACGCCACCCCTGGCCTTGGCATCGCCGTCGTCGCCTTCGGTATCTACCTCGTCGGCGAACAAGTCTACAATAGGCTCTATGCTC
Gma.2987.1.S1_s_at	CD393690	At1g14450	1e-19	Energy			ATAGGCTCTATGCTCCCGATCCTCATTCGATTTCTCACGTGAAAGCCGGGGATCACCACTAAACGTTTGGACGGACGCACTCCATTCCATCATCACTTAATAAGCTTGCTAGCATGTTCTCGCAGCCTTTAATGTTTAAATTTCAGACCGTGTTCGCTTCTTTGGCACTCACTATGTTGTCTTGTATGCCTACATTTTATGCCTTCAA
Gma.2650.1.S1_at	AW349689	At5g20080	1e-122	Energy			CTCCCCGGATGACATACTGCTTAAACAAAAGCTTGACATTCTNGCAACAAGCCACCCAAACTTAAAGATATTCTACACTGTAGATAATCCAACNAAAAATTGGAGAGGAGGTGCNGGNTACATATCAAAGGATNTNGTTGTGAAAGGCTTACCCNGNCCTAGTGATGATACTCTNATACTTGTGTGTGGACCCCCNNGTATGATGAAAGCAATATCTGGAGAAAAGGCCAAGGACTGGACACANGGAGAGGTTTCTGGCNTCCTAAAAGAGGCTGGATACACTGAACAAATGGTATACAAATTCTGAGAAGTTTAGTTTTCTTGCATCTGAAGATAGTATTCGAAGCNCTTGTCCGCTGCAGAATTCGTGTACTGAAATGGTTTTCTGAAGAATAACAG…
Gma.2679.1.S1_s_at	BI945807	At2g27510	8e-40	Energy			GGCGGTATATAAAGTGAAGCTGATTGGACCNGACGGTGAAGAGAATGAATTTGAAGCCCCTGATGACACTTACATTCTGGATNCNGCTGAAAATGCTGGAGTGGAGCTACCTTACTCATGCAGAGCTGGNGCNTGCTCTACTTGTGCTGGCCANGTTGTTTCAGGCTCTGTGGATCANGCAGATCAATCCTTTCTTGATGACCATCAAATNNAAAAGGGTTACCTTCTGACATGTGTNTCATACCCGAAATCAGATTGTGTGATTCACACCCACAAGGAGGA
Gma.2731.5.S1_at	BQ299100	At3g10860	2e-26	Energy			GATTTCGCATTGGTTTGCGTTGCGTGGTTGGTTTTGCGGTATCGAAGAAGAAGATGGGGAAACAGGTTGTGCCGGTGAAATCAGTGATCTACGCGCTTTCCCCTTTCCAGCAAAAGATTATGCCGGGTCTCTGGAAGGACTTGCCCACGAAGATTCACCACAAGGTCTCCGAGAATTGGATCAGCGCCACTCTTTTGCTCGGTCCCCTCGTCGGCACCTACGCGTATGTTCAAAACTACCTGGAAAAGGAGAAGCTGGCTCACAGGTACTGAGCTCTTGCAAGAGCTGATTGGAT
Gma.2731.5.S1_s_at	BQ299100	At3g10860	2e-26	Energy			ATGCCGGGTCTCTGGAAGGACTTGCCCACGAAGATTCACCACAAGGTCTCCGAGAATTGGATCAGCGCCACTCTTTTGCTCGGTCCCCTCGTCGGCACCTACGCGTATGTTCAAAACTACCTGGAAAAGGAGAAGCTGGCTCACAGGTACTGAGCTCTTGCAAGAGCTGATTGGATAACCTTCTAGTTTGTTGCCTTGATCTTGTTTAGCCACCCAATAATGTGACACTGTTG
Gma.2011.1.S1_s_at	CD407513	At4g25570	5e-73	Energy			TGGGATTGCCAATCTCTACAGCTTGCATTCATGGCTTGGAATTGGGGTTATTGTCCTTTATGGCATTCAGTGGATATATGGGTTTGTGATCTTTTTCTTCCCTGGTGGGACTCCAGACATTAGACGCGCCTCACTTCCTTGGCACGCGCTATTTGGGCTGTTTGTATTTGTCTTGGCTGTGGGCACTGCTGCTCTTGGGTTTCTGGAGAAGCTCACTTTCCTTGAGAACTCAGGATTGGACAAATATGGTTCTGAGGCTTTGCTTGTCAACTTCACTGCCATTATCACAATCTTATTTGGTGCCTTTGTTGTGTTATCTGCTCTAGCTGA
Gma.2162.1.S1_at	BI968990	At2g01140	1e-165	Energy			TTTCTTTCTCATATGCACGGGCTCTTCAGAACACNGTGCTNAAGACATGGCAAGGACACCCTGAGAATGTGGAAGCTGCTCAAAAGTCCCTTTTGGTGCGTGCTAAAGCAAACTCCTTGGCTCAACTTGGAAGATACTCTGCTGAGGGTGAGAGTGAAGAGGCCAAGAAGGGAATGTTTGTCAAGGGCTATACCTACTAAAACT
Gma.15514.2.S1_at	AI965499	At3g52300	1e-65	Energy			TTTCAATTAGCAAACCATCAGAGGTTGATGTTGTTCTTGCTGGTTTAATAATAACAACTACATTGAATTCTTTGTAACTCGGTTCTCTTTTTCAGTTCAAAGGTTCTTATATTACAGTGTTGAAATTNTGTGGTACTGTAGTTAATCACTTGAGACTTATCCACAAAGTGCGGTTGTGGTCGTCGGCGAAACTGCTGATAAGGTTTCCGTCCGGAGACAATTTGAAGAAAATGTTGTTTTGCGTTAGTCTTAATAAATT
Gma.15514.2.S1_x_at	AI965499	At3g52300	1e-65	Energy			TTTCAATTAGCAAACCATCAGAGGTTGATGTTGTTCTTGCTGGTTTAATAATAACAACTACATTGAATTCTTTGTAACTCGGTTCTCTTTTTCAGTTCAAAGGTTCTTATATTACAGTGTTGAAATTNTGTGGTACTGTAGTTAATCACTTGAGACTTATCCACAAAGTGCGGTTGTGGTCGTCGGCGAAACTGCTGATAAGGTTTCCGTCCGGAGACAATTTGAAGAAAATGTTGTTTTGCGTTAGTCTTAATA
Gma.15886.1.S1_x_at	CD405745	At5g39950	3e-47	Energy			GGAGAGTTCTGCTTCTAGGGTCCAGTCTTTCCACTCTTCGGCGCGCTGGCAGCTCCACTTCAACGAGCTCAAAGAAACCAATAAGCTCGTTGTGATAGATTTCTCGGCGTCGTGGTGCGGCCCTTGCAAATTCATAGAGCCAGCGATTCACGCCATGTCCGAAAAGTTCACCGACGTTGACTTCGTCAAGATCGACGTCGACGAATTGCCGGATGTGGCGAAGGAGTTTAATGTGGAGGCGATGCCGACGTTCGTGTTGTGTAAGAAAGGGAAGGAAGTCGACAAGGTTGTGGGCGCAAAGAAGGACGAGCTCGAAAAGAAGATTGAGAAACATCGATCGCAATCTTAGCTCTGTAATCCAATTTATCCAGTTATTTATCTTTCTTTTCAAGAGAAACA…
Gma.16334.2.S1_at	BI973987	At1g80230	2e-45	Energy			ATACACTCTGGCCTTTCAAAATCCTGTGGCCTANGTTTGATTTTGATTTGTCTATACCTTNTTGTGTNNCAACTTTTGAGNTAGAAAGTTTATGCGATTATTTGAACGCAGGATGCTCATTTGCTTGAGCTACC
Gma.1651.1.S1_at	CD395076	At3g17880	6e-75	Energy			CTGAAGCCCAAGTACAAGCAGCATTATCTGCTTTAAAAGATGGGCAAGTCATGGGTATTCACTCTAGTGGTGAATTGGAAAAGAAGTTAAGTGCTGCATCAAAGACATCACGCTTGGCGATCCTGTATTTTACTGCAACATGGTGTGGCCCTTGTCGCTTCATTTCCCCTATTTATACAAGCTTGGCTGAAAAGTACCCAAAAGTGGTTTTTTTGAAAGTTGACATAGATGAGGCCAGGGACGTTGCTGCAGGTTGGAATATTAGCAGTGTTCCGACATTTTTCTTTGTTAAGAATGGCAAAGAGGTTGACAGTGTGGTCGGGGCAGACAAAAGTACACTTGAAAGCAAGATTGCACAACATGCTGGCTCT
Gma.16636.1.S1_s_at	AW705534	At3g15020	2e-52	Energy			TTCGTGCAATCCACTGTTACTGAACTTCCCTNCTTTGCTTCCAAGGTGAGGCTTGGGANGNNTGGNGTGGAGGAAGTTCTGGGCTTNGGNCNNCTCTCAGATTTTGAGCAACAAGGCCTCGAAAGCCTTAAGCCTGAACTCAAATCATCAATTGAGAAGGGAATC
Gma.16750.1.S1_at	BE658232	At5g40760	0	Energy			GATGTCTACGGTTCAAAGTGAGCTTGACTTGTCATATGGACAACGGTATCAAGGAGTAACCATTCCTGAGGCTTATGAACGCCTAATTCTTGACACAATTAGAGGTGATCAGCANCATTTTGTTCGCAGAGATGAGTTGAAGGCATCCTGGCAGATCTTCACCCCACTTNTGCACAGAATTGATGAAGGGGAATTCAAGCCACTCCCCTACAAACCAGGAAGCAGAGGTCCTGCAGAAGCAGATCAGTTACTTGAAAAAGCNGGCTATGTTCAAACACACGGCTACATATGGATCCCTCCTACCTTGTAGAGTNATCTAATGTAATAANATGAGGAATNTTTAGNTGCTAATGAATACACAATAAGCTTGNGAGGCTTCNNNTGGAACCACTCCTCATG…
Gma.16750.2.S1_s_at	BI700016	At5g40760	3e-30	Energy			ACTCCCCTACAAACCAGGAAGCAGAGGTCCTGCAGAAGCAGATCAGTTACTTGAAAAAGCNGGCTATGTTCAAACACACGGCTACATATGGATCCCTCCTACCTTGTAGAGT
Gma.17706.1.A1_at	BI943579	AtCg00500	3e-67	Energy			TCTTATTCTGGTATGTGCGTCCGGAGGAGCGCGTATGCAAGAAGGAAGTTTGAGCTTGATCCAAATGGCTAAAATCTCTTCTGCTTTATATGATTATCAAAAAAATAAAAAGTTATTCTATGTATCCATACTTACATCTCCCACTACTGGGGGGGTAACTGCTAGTTTTGGCATGTTGGGGGATATCATTATTGCCGAACCAAATGCTTATATTGCATTTGCTGGTAAAAGAGTAATTGAACAAACATTGAATAAGGCAGTACCTGAAGGTTCACAAGCAGCTGAATATTTATTCCATAAGGGCTTATTTGATTCAATCGTACCGCGTAATCTTTTAAAGGGCGTTCTGAGTGAGTTATTTC
Gma.17869.1.S1_at	AW156331	At1g12840	6e-14	Energy			TAATAGTACATTCTATCCTTGAAGGGTTGACTGATAGCACAAACAGTGCATACTGGAAGACCGAGGATGAAGTAGGTGCCGGGATGGCTGGCCTAGCAGGTGATGCCGATGCTCACCCCTATGTGTCTTTCACCATCAATGTTGCTTGAGGGCTCTCAGAAACCAGCCCGATACTTAATTTACAATCCATTATGGGCTCCTTTGGACAGCAATAATGCCAATGCAAACAGGATTTGAAGAAGATATTGNTNCATNACGATCATATTTCATTCTTTGTTATTTATCTATATAATTGAAGCGATCAAAGTTTCAAAAGGGTTTAATGAATTTCAAGGGTAGCGTCTGGTGCCAGGATTGACCATTAGCAACTTGTATTGTTTCGTGTAAGTTTTCTTGTCG…
Gma.17933.1.S1_a_at	CD395441	At5g53560	2e-42	Energy			TTTGTTATCTGCAACAGGGAAAGATGCAACCAATGACTTTGAAGATGTGGGGCACAGTGATTCTGCTAGAGATATGATGGAAAAATACTACATTGGTGAGATTGATGCATCAACCGTCCCACTAAAACGGACCTACATTCCACCTCAGCAAGCTCAGTACAATCCTGATAAGACTCCAGAATTTGTGATCAAGATTTTGCAGTTCCTGGTCCCTCTCCTGATCTTGGGCTTGGCCTTTGTTGTGCGACACTACACCAAGAAAG
Gma.17682.1.S1_at	BG839162	AtCg00120	0	Energy			CAGACCCGCTATTAATGTAGGTATTTCCGTTTCCAGAGTTGGATCGGCGGCTCAAATTAAAGCCATGAAACAAGTAGCTGGTAAATTAAAATTGGAATTAGCACAATTCGCAGAATTAGAAGCTTTTGCCCAATTCGCTTCTGATCTCGATAAAGCTACTCAAAATCAATTAGCAAGAGGTCAACGATTGCGCGAGTTGCTTAAACAATCCCAATCAGCTCCTCTTACCGTGGAAGAACAGATAATAACTATTTATACTGGAACGAATGGTTATCTTGATTCATTAGAAATTGGACAGGTAAGGAAATTTCTTGTTGAGTTACGTGCTTACTTAAACACGAATAAACCTCAATTCAAAGAAATCATATCTTCTACCAAGACATTCACTGGGGAAGCAGA…
Gma.17597.1.S1_at	AW349391	At2g36530	0	Energy			AACCAAATTGGTTCTGTGACTGAGAGTATTGAAGCTGTCAGGATGTCCAAAAAAGCTGGATGGGGTGTCATGGCNAGTCACAGAAGTGGAGAGACTGAGGATACCTTCATTGCTGACCTTTCTGTTGGTTTGGCNACGGGTCAAATTAAGACTGGAGCTCCATGCAGGTCNGAGCGTCTTGCTAAATATAACCAGCTCTTGAGAATTGAGGAG
Gma.17053.1.S1_s_at	BI945957	At3g04120	4e-23	Energy			GTCTTTTTAAGGTGGTGTACTGCAAAGTTNNNTNNNNNNNNNNNNNNNNNNNNNNNNNNNNNGNNNNANNNNNNNGNTCNGAATAAATCGGTTTCTGGAACCAGTGGATTTACCTTGTTAGGAGCATTAGCTCTATTTTGGACTTTGCCTCTTGTGGAGGAGGAT
Gma.17053.2.S1_s_at	AW348911	At1g13440	1e-160	Energy			GTTACTTCAAAGTAGCTTGTCTTCACATTATTACCGTATGTTTATGTTTAGCTGCGATTTAG
Gma.17053.3.S1_at	CA783832	At3g04120	1e-56	Energy			GTTGGTGATAACAGATCAAGTATTTTTGATGCAAAGGCTGGAATTGCATTGAATAAGAATTTTGTGAAGCTTGTCTCTTGGTATGACAACGAGTGGGGATACAGTTCACGTGTCATTGACCTGCTTGTAATCGTTGCCAAGAAGTCTTTTTAATTAAGGTGGTTCTAACATTATGTGCTGGTCAAGCTGCGATTTAGTGTCTTGCTCGTGCAAAAATTGAGAAGTATGAATAAATCGGTTTCCGGAACCAGTGTTGTTACCCTGTTACGAGCATTAAGCTCTTTTTTGTTGCCTCTTCTGTGTAGGGGATGGAGTTTTTTGGATTCTTATATAC
Gma.17053.3.S1_x_at	CA783832	At3g04120	1e-56	Energy			CTCCACCGACTTTGTTGGTGATAACAGATCAAGTATTTTTGATGCAAAGGCTGGAATTGCATTGAATAAGAATTTTGTGAAGCTTGTCTCTTGGTATGACAACGAGTGGGGATACAGTTCACGTGTCATTGACCTGCTTGTAATCGTTGCCAAGAAGTCTTTTTAATTAAGGTGGTTCTAACATTATGTGCTGGTCAAGCTGCGATTTAGTGTCTTGCTCGTGCAAAAATTGAGAAGTATGAATAAATCGGTTTCCGGAACCAGTGTTGTTACCCTGTTACGAGCATTAAGCTCTTTTTTGTTGCCTCTTCTGTGTAGGGGATGGAGTTTTTTGGATTCTTATATACTTGCAGATGTACTCGGGCTTT
Gma.17053.4.A1_s_at	CD407783	At3g04120	4e-10	Energy			TGTCTAGACATTATGTGCTGGTGTCTACCTGCGATTTAGTGTCTTCTTGCTCGGGCAGAAATGAGAAGTATGAATAAATCGGTTTCGGGAACCGGTGTTGTTACCCTGTTAGGAGCATTAAGCTTTTTTTTGTTGTCTCTTCTGTGTAGGGGATGGAGTTTTTGGATTATTATATACTTGCTGATGTACTCGGCTCTTTGTTGATTCTGATTGCAGACATTTTTGCCCTC
Gma.17053.5.S1_s_at	BM309062	At1g13440	6e-49	Energy			GGCAAGGTCAAGATCGGAATCAACGGATTTGGAAGAATTGGCCGTTTGGTTGCCAGAGTCGCTCTGCAAAGAGACGATGTNGANCTCGTTGCCGTTAACGACCCTTTCATTACCACCGATTACATGACATACATGTTTAAATACGACAGTGTTCACGGACACTGGAAGCATCACGATGTCACCGTTAAGGACGAGAAGACCCTTCTCTTCGGTGACAAGNCAGTCACTGTTTTTGGACACAGNAACCCTGAAGAGATCCCATGGGGGTCAACTGGAGCTGANATCATTGTTGAGTCCACCGGAGTTTTCACCGATAAGGACAAGGC
Gma.17344.1.S1_at	CD409198	At2g33040	1e-137	Energy			TTCTTCAGAATCTGGCTGAGTTCCAGTTTTCTTGTGTCATGTACAATGCTGTGTTGGAGAATGCTTGTAGTGAGCAAGGAGCAAGAATGTCTGCAATGGACAGCTCTAGCAGGAATGCTGGGGATATGCTTGATCGTCTCACCCTCACCTATAACAGAACTCGTCAAGCATCAATCACCACTGAATTGATAGAGATTATCTCTGGAGCTTCCGCACTGGAAGGTTAATTACAGGAGAGCAATCTGTGTAATATATTCAACAGTGGCGCGATATTAAGATAATATCGTTGGATTCTTTTGAAATTTGTTGGTGTCATTTTTTTAATCTTACTTGACTTCTGTAATAAGTGTTCCAAGGTCAAACCCATTGT
Gma.17476.2.S1_at	BE058960	At2g36460	1e-178	Energy			GTACTGATCAATCTAAGTGCGGGTAGGAATCGGTATTTTATGGGTACAACCGAATTTTCTTGTTAATGAGTATTGTGCTTCGACTCTTCCCAGAATAATAATCGTTTGGAATTTTGCTTTTTGTTTTTCCTAGTGTTCCTTCATATCAATTTTAGTAATTCGGTGTATTGGTCAAACCTGTGCAAACAGGGGAGGGGATGTAACTTTGTTTTCTTGATAGACACCACCACCTTGCTGTTAACGAGGCTTTGTGTTTATTTTGCA
Gma.15493.1.S1_at	BE474397	At2g17420	5e-72	Energy			GTTTTTCGCAATTGGGCACGAGCCCGCNACCAAGTTCTTGGACGGGCAGCTTGAATTGGATTCTGATGGATATATTGTGACGAAGCCGGGGACGACGAAGACCAGTGTNGAGGGAGTGTTTGCTGCTGGGGATGTTCAGGACAAGAAGTATAGGCAAGCTATTACTGCTGCTGGCACTGGATGCATGGCTGCTTTGGATGCAGAACATTACCTGCAAAATGTTGGTTTACAACAAGATAAGAGTGATTGACTAGCTTGGGTGTGTCCGGAGATCAGAAAATGCTTAATCAGAAGCAATGTTTAATTCCTATAGAAGAATNGNGANNNNNNNNTGCATCCTACNAGAATCTNCATTTGTGGGTTGCNACATTCATATTTTTATTGCAGANNNAGANTTGC…
Gma.15499.1.S1_at	AW348149	At5g65690	1e-156	Energy			GCATTCATTATGCTACACCCTACAAAGTATGCAGCAAT
Gma.1488.1.S1_s_at	AW394837	At5g08290	1e-79	Energy			ACGACTGGGACGAAACCTGCATGCAGATGGACGAGGTGTTGGCGTCAGTGGCGGAGACGATAAAGAACTTTGCGGTGATATACCTGGTGGACATAACGGAGGTGCCGGATTTCAACACCATGTACGAGCTCTACGACCCTTCCACGGTGATGTTCTTCTTCAGGAACAAGCACATCATGATTGATCTCGGAACCGGTAACAACAACAAGATCAACTGGGCTCTCAAGGACAAGCAGGAGTTCATCGACATTGTTGAGACCGTCTATCGTGGAGCCAGGAAGGGACGGGGTCTCGTCATCGCTCCCAAAGATTACTCCACCAAGTACCGTTACTAGT
Gma.14563.1.S1_s_at	CD399224	At2g02850	7e-37	Energy			TTGCTGCTTCACTCTCAGATGGCTCGTGCTGCCACCTACACAGTTGGAGATTCTGGGGGTTGGACCTTTAACACTGTTGCCTGGCCCAAAGGAAAGCTCTTTCGGGCTGGTGACACACTTGCTTTCAATTATAGCCCTGGGACTCACAATGTGGTGGCCGTGAACAAGGCTGGATATGATAGCTGCAAGACTCCAAGAGGAGCCAAAGTGTATAAGTCAGGGACGGATCAGATCAGACTTGCCAAGGGACAGAACTACTTCATCTGCAATTATGTTGGTCACTGCGAGTCTGGGATGAAAATTGCCATCAACGCTGCCTGAGTTTAATAATATGGTTAACTNCCCATACATATTGTATTGTAATGCAAATTGCACCCTTTAGTGGGAAGTTAGCTCCTT…
Gma.1390.1.S1_at	BE659513	At5g04140	0	Energy			AACTACGGCAGATCAGGTCACTTATCAGTCTGCTTAGGGTAACAATCTAAGGTTACATTACATTGATTACGCCAGGCTATGGAGCCATTGTTGTGTCCCTGATTTGTACAGGAATTGGAGAGGCTATCAATTAGGTGGAAATGCTAGCCAAAATATGGGATTAAACTATCCCTTGAAACCATGGTGCTGCATGTATTCTCAAGATCATTTTTGCCAGCAGTATGAGGAACCCCGTATACATCCATCTGAAGCATTAGCATTCTCTTTTGTATAGCCATGTGAAAGGAAAAAAGCNTGTATATAAAATGCAGTTGATTCGAATTTGATTGGGACTTTTGTGGACGGTCAAAATAAATAGTTGGGGCTTGATATGCCTGGGTCCCCTTTG
Gma.11271.1.S1_s_at	CD416236	At1g51650	2e-30	Energy			AACATATGCGCGAATCTGGTCAGGAATTGCCTCAAGGAACCCTACAAGGCTGAAGCCATCTCTCGTGAGAAGGTCCATTTTGCTCTCTCCAAATGGGTCGACGCCAAGCCTGAAAAACCTACTATTCGTTCAGACACCCCAGAGCAGTGATCCGGAATAGTTGGAAGCTATAAATGCATAAATCTTTGAGATCTGGAAGTTCATTGTCATTTTGAACCTTTCTGTGATGTTTAATTCC
Gma.11925.1.S1_at	CF922804	At1g11530	1e-39	Energy			GTGGCTATGACTCCTGTTTTTGAAGAACTGGCTTCAAGCTATCCGGAAGTTCTGTTTCTCACTGTTGATGTTGATGAAGTCAAGGAGGTAGCCACCAAAATGGATGTAAAGGCAATGCCAACATTTTTGCTGCTGAAGGACGGTGCTGCGGTGGACAAGGTGGTTGGTGCCAATCCAGAAGAGATAAAGAAAAGGATAGATGGGGTTGCTGAGTCCACTCGTGTCTCACTGGCATAGTTAAGCATCTGTATGATATTCTACTGTTGCAAGTTGCAAGATATGTGCTTGTGGTCCTGCACTGCACTATGGCATCTGAGTCAAAGCTTTTTGTGATGTTGTATGTTGTTGAATATCAGTTCAAGTGTAATTTCCAAATTTGATAAGCGCAATGCTTTGGTT…
Gma.1186.1.S1_s_at	CD411934	At2g32720	3e-59	Energy			GATGCAACCAATGATTTTGAGGATATTGGTCACAGCACCAGTGCCGTAGCCATGATGGATGAGTTCTATGTTGGAGACATTGATACATCAACCATCCCCAGCAAGGTTAAGTACACTCCTCCAAAACAACCTCACTATAACCAGGACAAGACTCCGGAGTTCATCATAAGGATCCTCCAGTTTCTAGTTCCGTTGTTTATCTTGGGTTTGGCAGTTGGCATTCGTTTCTACACCAAATCAACAT
Gma.11932.1.S1_at	BI095057	AtCg01050	3e-61	Energy			TCTATATTTTCTCCCTGGTTAATACTATTAGGTTCAATTCAAATAATCTATGCAGCTTNAACATCTCTTGGTCAACGCAATTTAAAAAAAANGAATAGCTTATTCTTCAGTATCTCATATGGGTTTCTTACTTTTAGGAATTGGTTCTATAAGCGATACAGGTCTCAACGGGGCTATTTTACAAATAATATCTCACGGATTTATTGGCGCTGCGCTTTTTTTCTTGGCGGGAACGAGTTATGATAGACTACGTCTTCTTTATCTCGACGAAATGGGTGGAATGGCTATCCCAATGCCAAAAATATTCACGGTTTTCACTATCTTATCGATGGCTTCTCTTGCATTGCCGGGCATGAGCGGTTTTGTT
Gma.11940.1.S1_at	BI942780	AtCg00480	1e-76	Energy			GGAGCTGCCCTAAGTGTTCCAGTAGGTGGAGCAACTCTAGGACGAATTTTCAACGTGCTTGGAGAGCCCATTGATAATTTAGGTCCTGTAGATACTCGCACAACATCTCCCATTCATAGATCTGCGCCTGCCTTTATACAATTAGATACAAAATTAGCCATTTTTGAAACAGGAATAAAAGTAGTAGATCTTTTAGCTCCTTATCGTCGTGGAGGAAAAATAGGACTTTTCGGTGGAGCTGNANNNGGTAAAACGGTACTGATTATGGAATTGATCAATAACATTGCCAAAGCTCATGGAGGTGTATCTGTATTTGGCGGAGTA
Gma.11940.2.S1_at	BE440563	AtCg00480	1e-144	Energy			GACTTTAAATCTTTGTGTACTGACCCCCAATCGAATTGTTTGGGATTCGGAAGTGAAGGAAATCATTTTATCTACTAATAGCGGACAAATTGGAGTATTACCAAATCATGCGCCTATTGCCACAGCCGTAGATATAGGTATTTTGAGAATACGTCTTCTTAAAGACCAATGGTTAACGATGGCTCTGATGGGCGGTTTTGCTAGAATAAACAATAATGAGATCACTGTTTTAGTAAATGATGCGGAAAAGGGTAGTGACATTGATCCACAAGAAGCACAGCAAACTCTTGAAATAGCAGAAGCTAATTTGAATAAGGCGGAAGGCAAGAGACAAACAATTGAGGCAAATCTAGCTCTTAGACGAGCTAGGACACGAGTAGAGGCTATCAATGTGATTTC…
Gma.1201.3.S1_at	AW733664	At3g06650	1e-167	Energy			ACGCTCCATTGGTCTGATTGGGCACACCTTTGACCAAAAGCGATTGAAGCAACCACTTTACCGTCACCCATGGGAGGATGTTCTCTACACAAAGTGAGNAAGTTTTGTGCGACTGTAAGAACTTTGNCATGCTTCAAATTAGCAATCTTTTGGGAAATCATGCACATCTGAAATATGCTGGAGTGGTTTTGTAGCTGTTAGACTAGTGTTGTACGATCTATTGGTGAAAAGTCATCTTCCATTTGTAACTTGTAT
Gma.12202.1.S1_at	AW459431	At2g36460	1e-164	Energy			AACGCCATGAACAAGTCCCAGGGAAAGAAGCCGTGGTCCCTTTCTTTCTCTTTTGGAAGGGCACTTCAGCAAAGCACTCTCAAGGCATGGGGTGGGAAAGATGAAAACATTAAGAAGGCTCAGGATGCTTTATTTGCCAGGTGCAATGCAAACTCACATGCAACTTTGGGAACTTACAAAGGTGATGCTACCCTTGCTGAGGGTGCCTCCGAGTCTCTCCATGTCAAGGACTACAAATACTAACTAAAGGTGTTGACTTCTTTTAATTTGGAGAATTTTTGCACTATTGGCTACACCATTCTCATGTTCTTTCCTTCATAGAAGTTAGACTCGGCCGATTTGCTTTCTGCTCTCGGTTATAGGATGTCTACGGATTAAAGAATAATCGCATCAAGCTAA…
Gma.1305.1.S1_at	CD411822	At5g39950	4e-43	Energy			CTACTTCTAGAGTCTCCTCCTTCCACTCGTCGC
Gma.1305.1.S1_s_at	CD411822	At5g39950	4e-43	Energy			GCTCTACTTCAACGAGATCAAAGATACCGATAAGCTCGTTGTGATAGATTTCTCGGCGTCGTGGTGCGGTCCTTGCAAATTCATAGAGCCAGCGATTCACGCCATGGCCGACAAGTTCAACGACGTTGACTTCGTCAAGATCGACGTCGACGAATTACCTGATGTGGCGCAGGAGTTTCAGGTGCAGGCGATGCCGACTTTCGTGTTGTGGAAGAAAGGGAAGGAAGTCGACAAGGTTGTGGGCGCAAAGAAGGACGAGCTCGAGAAGAAGATTGAGAAACATCGATCGTGATCTTAGCTCTGTAATCCTATTCATTCAGCTATTTATCTTTCTTTCCAAGGTGAAAAG
Gma.10771.2.S1_x_at	BU762116	At4g10040	8e-58	Energy			GACAATCTGGTACAACTCCTGGATATTCCTATTCTACTGCTAACAAAAACATGGCCGTGATTTGGGAGGAAAAGACCCTCTATGATTACTTGCTCAACCCCAAAAAGTATATTCCAGGAACGAAGATGGTATTTCCTGGTCTTAAGAAACCTCAGGAACGTGCAGATCTTATTGCATATCTTAAAGAATCTACTGCTTAATGATTAAATTTTCATACAGTTATGCACTTTGCTTCAAAGTTCTGGAGATTTAGTTTTCAGACATTTAATTCTGTGGTGCAGTAAATACTGTATCAACAAATAAAGTAGACTTGATTGGTTTGCAATGCTATTTTGTTCGTTTTGCATTGCTTCTTAAGAGGCTGCCATATATTGGCTACTGTTCAATTAATTTGGTTGT…
Gma.10702.1.S1_at	BE057108	At5g08530	2e-48	Energy			GCATGGCCAGTGCAGGGTCTTATCAAGCATTTCAGGCCTGAGCTTGAGAGAAGGATTAGAGAACATGCAGAAAGGGAGCTGCTGCAGGCCACTGGTTAGGCTTTCACTAAGGGGTGTGATTGTACTGCTGGATAGCAAGAGTGAGAATAAGACAGTGCCAGTCATTTTGGAAAGATAGGTGGCTCAGGTTACTGTAGCTTTATTGCTACTTCTATTTTCTTTTATGCTGTAGCAATTATGGCTGGATCATACCTGGGAAACCATTTGGGCGAGTTTAAACTGTACCTGCTTGTCATTTGGCACATTTTCATGTAATTTGTTAATAATATCTGTATACTGTTATTAGTTTTGAAACACAATTCATGATTATGCATGTTATCAGTGAATATGATGAGGGAT…
Gma.10919.1.S1_s_at	AW348585	At5g53560	7e-35	Energy			GTCAACAGGGAAGGATGCCACCATTGATTTTGAAGATGTGGGCCACAGTGATTCTGCCATAGAAATGATGGAAAAATACTTCGTCGGGAAGGTTGACACTTCCACTCTTCCAGCGAAAGTTAACCATAGTCTGCCACAACCTACACAAGCAGGTGGCGCTGGCAATCAATCTTCTGGATTTGTTGTAAAGATCTTGCAATTCCTGTTGCCATTCTTGATATTGGGCCTTGCCTTTGCCCTGCAGTACTATGGCAAAAAGAAGCATGCTAGCACCTCATGAAATATGAAGTTGAGCTAGAGCCGAAGTTTCATTAGGTTTGTTAATTCATTGCCTACTTCAATGCAGTATTAAAGNGGTAATAGACTTTAGTCAATGTTGTGTGTCTGTCATTTAAACTC…
Gma.11002.1.S1_at	AW350981	At1g15690	0	Energy			GATTGCTATTTCTGCATCCAACACCGGTGGTGCTTGGGATAATGCCAAGAAGTACATTGAGGCTGGTGCTTCTGAGCATGCAAGAAGCCTTGGTCCAAAAGGGTCAGATTGTCACAAGGCAGCTGTTATTGGTGACACCATTGGAGACCCTCTAAAGGATACATCTGGACCTTCACTTAACATCCTTATTAAGCTCATGGCGGTTGAGTCTCTTGTGTTTGCTCCCTTCTTTGCTACACATGGTGGCCTACTCTTCAAGATCTAAAGGATTTGATAGAAAAAGAGTATCGTCCATCATTTTTCTACAACGACAGAACAAGGAAAAGCCGTCCCTTTACCAATGCCTTCTCGTTTTTGTGTTAGTCTTTAACTCATCTGTCATGTCAATTCCATTGTTTT…
Gma.11089.1.S1_at	AI855657	At5g50850	1e-121	Energy			ACAGTTGAAGAAGGGTTTCCTCAGCATGGCGTTGGCGCTGAAATCTGCACATCTGTCATTGAAGANAGTTTTGGTTATCTTGATGCACCNGTTGAGAGAATTGCNGGGGCTGATGTTCCCATGCCNTATGCAGCAAATCTGGAAAGAATGGCTGTCCCACAGGTTGAAGATATTGTTCGTGCTGCAAAGAGAGCATGCTACAGATCTGTGCCTTTGGCNGCATCTGCTTGAATGNTCTGGAAANTTTTCNTGTCCTGGTTAGTTCTTTGCAGAAACAAANTTTTCCCTANTTTCCGCCANAAAACAGCAGGAAGAAATTGCAACCAAAGAATGNTGATTTTAACTCATTTNTTATGTTAGGCTTTGGTTTAAAAGATTCTGTTGTATGCATAATACTGT…
Gma.11058.1.A1_at	CD393957	At5g47890	3e-35	Energy			CTGCTCTTGTTATTGCAAATTGCCTTTTGGTTTAAAATAAGCCAGGTCTTTTTCTATGTCCCATGGCCTCTGGTTTCAGCCTGTCTCTGGATCTTACATCGTTTCAAGTATGACACTGTTGAGTTTAAGTTCAAAATCCTGGTTTTGCATGTTGAACACATCGAGGGAGATTTAT
Gma.11220.2.S1_a_at	CF920389	At4g29010	1e-121	Energy			GAAGACTTTGCAATATTATGCCCAATGGAAAGCCTATATCTGTTACTGACCAAGAGATCGTGGAGATGATACTCTTCCCAGTAGTTAATGAGGCATGCCGTGTTCTAGAAGATGGAGTTGTTATTCGAGCATCAGACCTTGACATTGCATCTGTTCTTGGAATGAGCTTCCCAAATTACCGGGGTGGCATTGTTTTCTGGGCAGACTTGGTTGGGGCCAATCATATATATACCAGCCTAAAAAAATGGGCACAATTATATGGTAACTTCTATAAACCCTCAAGGTATTTGGAAGAAAGAGCACTCAAAGGCATTCCCTTGAGTGCACCTGCTTCATCTACTCCAAAGTCAATGGCACGTCTATGAGAAAGCCAAGTGTTGAGCATATATGTTGGATGTT…
Gma.11258.1.S1_at	CD403347	At5g47030	8e-66	Energy			CTAGCTCAAGGATGTTGGGCAAGACCTTGAAATTAGAA
Gma.11202.1.S1_s_at	AW309575	At1g27970	1e-57	Intracellular Traffic			CAACAGGAACGGCTTAGCGAATCTCTACCAGGAGGGTTCCATGCTCACTTTCGAAGGGCAGAAGATCCAAGGCGCTTCCAACATCGTTGCCAAGCTCACCTCCCTCCCTTTTCAGCAGTGCCACCACTCAATCTCCACCGTCGACTGCCAGCCCTCCGGCGTCAACGCCGGCATGCTCGTCTTCGTCAGCGGAAACCTTCAGCTCGCCGGCGAACAGCACACTCTCAAGTTCAGCCAGATGTTCCATTTGATACCAACACCTCAGGGAAGCTATTATGTGTTGAATGACATATTCCGTTTAAACTATGCATGAAGATGTCATATGACCGGAAAGGCCAT
Gma.10971.1.S1_at	BI969499	At2g20840	2e-84	Intracellular Traffic			GAATTCCTGGAGCATATGTCTTGTGGTATCGCCCATTATATCGTGCTTTTAGGACTGACAGTGCTTTGAATTTTGGATGGTTTTTCTTGTTTTACCTGCTTCACCTAGGATTCTGTATCTTAGCTGCAGTTGCTCCTCCCATAGTTTTCAAAGGAAAATCCTTGACAGGCATTCTGTCAGCCATAGANNTGGTGGGTGACCATGCAGTGATTGGAATTTTCTACTTTGTTGGATTTGGATTGTTCTGCATTGAAACATTGATCAGTNTCTGGGTTATTCAGCAAGTATATATGTACTTCCGTGGCAGTGGTAAGGCTGCTGAGATGAAGCAGGAGGCTGCAAGAGGAGCANTGAGGGNTGCAANATGATAAATTACNTTGTNAANCCCTGTGTTTGAAT…
Gma.10915.2.S1_s_at	BI424428	At2g33120	5e-95	Intracellular Traffic			GAGGGAACATATGCAGTACTGTGTTGATCATCCTGAAGAGATAAGCAANCTTGCAAAGGTGAAAGCTCAGGTTTCTGAAGTTAAGGGTGTCATGATGGAGAATATTGAAAAGGTTCTGGACAGGGGTGACAAGATAGAACTTCTGGTGGACAAGACTGAGAACCTTCATAACCAGGCACAAGATTTCAGGACTTCTGGAACCAGAATCCGTCGAAAAATGTGGCTGCAAAACATGAAGATNAAGCTGATTGTATTGGGAATATTGATAGCACTTATCCTGATAATAGTCCTATCTGTGTGTCGTGGGTTCAACTGTGGAAAATAGCACCATTCTCCGAGGCCTTTTATCATGTTATTTCAACCTTGAGATTATCGGAGAAAAGATACTAATGAATGGCA…
Gma.1035.1.S1_s_at	CD418467	At1g30630	1e-132	Intracellular Traffic			CCAATCTAGTTGTATGCTGTCTTCATCTCGGCAAACCATCTAACAAATCATTCAGCCAGCTGAAACTTTCTCACCCAGAGCATGTATTGGTCAAACGGGTATCATCAGCTGAAGAAAGTTTTGATAGAGCGCTACAATCATTTTCCTCATGAGTGTCGATGATTGAATTTCTTTCAAGAGTTGAATGGTGTGAGGTCTTCCCGTGCAATTTTTACACCTTATCGTGGCTATTGTATTGGTTGCGTATCTTAGAACATAATCAACTGGGTAATGTGTCATAG
Gma.1045.1.S1_at	CD390651	At3g25040	1e-102	Intracellular Traffic			CAACTAGTACTTTTACAGAGAACTAGAAATATTGACAATTTGACTGGACANTATGTCTTTCTNCTNGGTGCATACAGAGNACTATACATTCTCAACTGGATCTANCGCTACTTTACNGAGCCNCACTTTGTCCATTGGATAACATGGATTTCNGGCCTTGTTCAAACACTACTCTATGCTGATTTCTTCTATTACTATTTCCAAAGCTGGAAGAACAACAAAAAGCTTCATTTGCCAGCATGAGTNTATTCTTCTGTTCTTNAAAACAAGGGTCTANGTGGACAATTAACAGTNAGCAGAGAGGATNCACAAATTTGTCTGGACATAGTGGTTTCTGATTTACAATTGCCTATTTGTTCGTTCTTGCCANCTCAAATACTACTGTACTAATNACTAGGA…
Gma.10871.1.S1_at	CD403269	At5g20720	6e-98	Intracellular Traffic			CACAAGTTGTGTATTCGAAGTATGCAGGTACTGAGGTGGANTTCNATGGTACAAAGCATCTTATTGTGAAGGATGATGACATTGTTGGTATCCTNGAAACTGATGACATCAAGGATCTTAAACCCTTGAATGATAGAGTCCTCATAAAGGTTGCTGAAGCTGAGGAAAAAACCTCTGGCGGTTTGTTGCTTACAGAGGCAACCAAGGACAAACCTTCGATTGGAACAGTGATAGCNGTTGGGCCGGGGCATCTGGACGAGGAAGGCAACAGAAAACCNTTGTCCGTGACTCCNGGGAACACAGTTTTGTACTCCAAATATGCTGGAAATGACTTCAAGGGCAAAGATGGTTCTGACTATATTACCTTGAGAGTCTCAGATGTCATGGCTGTTCTCTCCTA
Gma.1321.1.S1_at	AF198627.1	At3g56240	2e-30	Intracellular Traffic	Ionic Homeostasis		TGAAGTTCTGCAAGCCGTTTCCAAATCTGGGAAGAAGACTGCATTCTGGGTGGATGAAGCACCACAATCTAAAAACAAGCCTTTAGAAAGTGCACCTGTTGCCTCAGAAAACAAGCCTTCAGAAGCTGCAACTGTTGCCTCAGCTGAGCCTGAAAACAAGCCTTCAGAAGCTGCAATTGTTGATTCAGCTGAGCCTGAAAACAAGCCTTCAGATACTGTTGTTGAAACTGTTGCTTAAGGCATTTGTGGTTCTATTTTTCTATGTGGAAGTAGGTCTGTTTCATATAGTATTTCATGTGCTTTGTGCATGTCAGCTATTATATTTGGTGTGTTGTTACTGGTATCTAAGCTACAATAACTTGTGGCCTATTTTTCACATGAGATACATTTCATGGGTGC…
Gma.12506.1.S1_x_at	CD404127	At3g49870	1e-93	Intracellular Traffic			ATCATTGGGTGGCATCCCTCTGTTGGTATTGGGGAACAAGATTGACAAAGCGGNGGCTCTGTCTAAACAAGCANTGACNGACCAAATGGATTTGAAGTCAATTACTGACAGGGAAGTTTGCTGCTTCATGATCTCGTGCAAAAACTCGACCAACATCGACTCTGTTATTGACTGGCTTGTAAAGCATTCCAAATCAAAGAGCTGAGAGCCTACTTTCTGTTTTGAACTCTAGTGTAATTTATGGGTGACACATTTTCTGGATTTACTAGAGGCATTTGCATGTCTAACTCGGTTGCTGATTGATTTGTTTTTCCCTTTTGTCAGATGCTTTGTAATATAATATCACATCATTCTTGTCCNATAGGGANTTAAACGGGANNANATACATGTGAAGGGTTA…
Gma.11398.2.A1_s_at	CD413467	At2g47170	1e-27	Intracellular Traffic			TAATGCCTTTGGGAGTCTTGCGGATTGGTAATTCTGGATGCAGGGGTGAACATTATCTAGCTTTTATTTCTTGGTCCTCTTCCAAGACAACTCGAATTTGTGCTCATGTAATGCGGTTTAGGACATCTCGAATTTGTGCTCATGTAATGCGGTTTAGGACATCTCGGTGCTAAATTGTAGTAGGATTTTACTTCTTGGGATGCGTAATACTCTGATCTTTCTATTGGGTTTGGATGCAATGTCCATAACTGTAATGGAGATACTAATTCAATGCGCCACCGGGTTCTGTCTGATTTATAGTTTTA
Gma.11282.1.S1_at	AI443415	At5g59840	4e-90	Intracellular Traffic			GATTCTAAGGCTGAACCTCAGACTATCAAGATTAACCAACCCGACCAGNCAGCNACNGGGGGTCTNGCNGCTCAAAAATCGGCTTGCTGTGGTTCATGAAANAAATAACANNTCAGAATCTGCAGTTAGAGGGTGCAGATTCAACACTNGCCCTCATATGGGTGCTATAGTTATTTTGATGACATTTAAAAGTGGGAGCATGTATTTGTCCTTGTATTTCCCAACTGCAAAGANTATGTTTTGAAGATAGTGNTTTAAATTTTTNGNTTACTTAGNTGTCGGATTTGTTGTGATTANTTCGTTTGCTCCANTCTCTCCTCTTTCATTTGTACNCCGACTCTTGAAAGAAAATCTTTCGATTGGATTCAGATTGATTA
Gma.11292.1.S1_s_at	CD409565	At5g47200	1e-100	Intracellular Traffic			GAATGAAATTGACCGTTATGCAAGTGAAAATGTTAACAAGCTTCTAGTTGGAAACAAGTGNGATCTNACGGCAAATAAAGTTGTGTCCTNTGAGACAGCAAAGGCNTTTGCNGATGAAATTGGAATTCCNTTCATGGAAACTAGTGCTAAAAATGCCACCAATGTTGAACAGGCTTTCATGGCCATGGCTGCTGAAATTAAAAACAGAATGGCAAGCCANCCAGTGAACAATGCNAGGCCTCCAACAGTTCAAATTCGAGGACAGCCAGTGAACCAGAAGGCTGGTTGCTGCTCGACTTAGANAGAGACGAAGTATTTGNGGTCTNAGANGTTNNCATGTGTCTCAGTGGCATCTAAAACTAGCTTTTCACATTGCTTTCATATCAAGAT
Gma.1324.1.S1_at	BE658235	At2g17800	1e-96	Intracellular Traffic			TGGCACAAAGCTTGACCTTCGGGATGATAAGCAGTTCTGCATNGACCATCCTGGTGCCGTACCTATTACCACAGCTCANGGAGAAGAGCTTAGGAAGCTGATTAATGCNCCAGCTTACATTGAATGCAGTTCAAAAACACAGGAGAACGTGAAGGCAGTCTTTGATGCAGCCATAAGAGTTGTCCTTCAACCACCTAAGCAGAAGAAAAAGAAGGGTAAAGCACAAAAGGCNTGNTCGATATTGTGATTCACTAGGTGTTAACATTTGACTGCCCTTTGTTCTNCCTGTATTACCCTCCCCTTCTTTNTTTTTATCATTTCNTTGNTATTGAAGAAGTTGNAGTNNTNTGTGGGTGTTCCTCAGACAAATACTCTAGATCTCCTTGAAGCAT
Gma.13352.1.S1_at	M64337.1	At5g01600	2e-80	Intracellular Traffic	Ionic Homeostasis		ATCTTGAATAGCCTTATTATTAGTCTTCATTTACATTT
Gma.13515.1.A1_at	CD400856	At4g04910	2e-28	Intracellular Traffic			GTCCTAGAACAGTTGAATGTGTTTACTGATGAAGATATTGATTCTGCTGCAGAGGCGTTGAATGATATGCCTATCAGGAAACTATACATGTTGATCGAGATGGCAGCGCAAGGGGAGCATGGTGGATCTGCAGAAGCCATCTTTTCTGNNNNAGNGAAGATTAGTATCGCTCANTTCTATGATTGCCTCCAGGATGTTGTTAGGTTATAAGTTGTTGTATTAAGCGCTTTCTAAGTTAGAGTGCATATAATCCTTATTGAGTTGAAATCTTTTTTTAACAGTTCATTACATTGCTTGNTNCGGTTCAGTTACAGAGATTTTTTTGAATCAGTGTTTGTTTGGTTGTGCTGATAGTAATTTTGAGAGGAGGCAGGGGTTTCGTAGTCTCATGTTTTATCT…
Gma.1450.1.S1_at	AF532625.1	At1g16920	2e-99	Intracellular Traffic			GTGTATGATGTCACTCGCCATGCAACATTTGAAAATGTTGACAGATGGCTGAAAGAATTGCGGAACCACACAGANGCCAACATTGTTGTGATGCTNGTNGGNAANAAATCAGACCTTCGTCACCTNGTAGCNGTGTCAACTGAAGATGGGAAGTCCTATGCTGAGAANGAATCACTTTACTTCATGGAAACCTCAGCTCTGGAGGCTACTAATGTAGAGAATGCNTTTGCNGAAGTTCTGACTCAAATCTANCNCATTGTTAGCAAGAAAGCAGTAGAGGNGGCTGAAAATGGAACNNCATCTGTGCCTGCCAAAGGAGAGAAAATTGATCTGAAAAATGATGTNTCTGCTTTGAAGAGAGTTGGTTGCTGCTCAAGCTAANATTGGAAAACATAGTTC…
Gma.15220.1.S1_s_at	CD398333	At4g05000	1e-92	Intracellular Traffic			GGAATTAATGGTGGCATGGCTTTGAGGGAAGGNNNNTGATGCATCTGGCAGGAAAGGAAAGGGAAAGGGNGTTTACCNAGTTTGTAGACAAATACGGTGCTAATGTCGATGGTTACAGTCCTATNTACGACACCAAGGACTGGTCTCCAACCGGTGATGTCTACGCTGGCGGTACGACTGGCTTGGCTATCTGGGCT
Gma.14966.2.S1_at	BM886910	At1g01620	1e-144	Intracellular Traffic			TCACGTCCCGATTTTGGCTCCTCTTCCAATCGGGTTTGCTGTGTTTTTGGTCCACTTGGCAACCATTCCAATCACAGGAACTGGCATTAACCCAGCTAGGAGTCTTGGTGCTGCTATAATATACAACAGAGACCATGCTTGGGATGACCATTGGATTTTCTGGGTTGGACCTTTCATTGGAGCTGCCCTTGCAGCTTTATATCACCAGATAGTGATCCGAGCAATTCCATTCAAGACAAGGGGTTAATCAATACTTCATCCATCTGTGTTTGAATTATCTTCAATCATGTGTCTATTTGCACAATTTATATGG
Gma.1887.1.S1_at	CA800104	At1g02130	1e-105	Intracellular Traffic			GGAATTCGCAGATCAAATTGGCATACCTTTCATGGAAACAAGTGCAAAAGATGCTACAAATGTGGAAGATGCTTTCATGGCCATGTCTGCTGCCATCAAGAATAGAATGGCTAGTCAGCCTTCAGCAAACAATGCAAGGCCTCCAACAGTGCAGATCAGAGGGCAACCTGTTGGACAAAAAAGTGGTTGCTGCTCTTCCTAACCAGGTGGTGCTGCTTGGTCTACACTTACCTTTTGCATGTAAGGGGCATATGCTATTTCACTAAATAGTGGACCAGTGTCACGTAATCCAACCTGTGGTTTGGGAATTGGCCTAGATGATCCCATTCTTTACCATATACTTGAATGCTATGATTGTGCTTAGTACTTGTTAATGATAAAACTTTTATATTTCTGCTN…
Gma.1659.1.S1_at	AW132168	At3g07100	1e-54	Intracellular Traffic			AAACCTTGTTGAGGACCAGATGGGTGGTAACAGTGGGTATGCTGAATGGATGCTGCAGATATCNCGACAAGTGCAGCAATCATAATATATAGCTTCCCTGGCTAAATAAGCAAGTCAGNTCTGCTATTTGTCTCACAAGTGACGACCATTTCTTTCTGCATTGGAGNTATATTAAATCTGTCCTTTGGGGNTGCTTGGAGAAGCATTCTTGACCTGGCTAATTGATCGTGACNTGTGAGAAGCATGCTTTTGAGAGATTGTTGATTCATCCTGGGAT
Gma.16342.1.S1_at	BI968678	At5g14420	1e-55	Intracellular Traffic			CTTTGAGCAGAGTGCCCCTTCTTATTATGACAACANGGACCNNGTTGGCACAGCTCCTCCTGCCCCAAGTTCCNCATATGACAATCAGCTTTGCCCCATATGTCTGACCAATTCAAAAGACATGGCCTTCGGATGTGGACATCAGACATGTTGTGAATGTGGACAAGATCTTCAGTCGTGTCCCATCTGTAGAAGCCCCATTAACACCAGAATTAAGCTTTACTAGGNGGCNTCTTCCGTTGTGAATTAANTATTTTGTNGTGTAAGCTAAAATTCTTTGATTTTTTTAACCTTCTCTGGTTGTATACAAACGTTAGATCAGCTGTGTCTATTGATGAAA
Gma.1630.1.S1_x_at	BF596536	At3g62290	1e-99	Intracellular Traffic			GTGGCCAAGATAAGATCCGTCCTTTATGGAGACACTACTTCCAAAACACTCAGGGGCTTATCTTTGTTGTGGATAGCAATGATCGTGACCGTGTAGTTGAGGCTAGAGATGAGCTCCACCGGATGTTGAATGAGGATGAGTTGAGAGATGCTGTTCTCCTGGTATTTGCCAACAAACAAGATCTTCCAAATGCTATGAATGCTGCAGAAATCACAGACAAGCTTGGTCTTCATTCTCTACGCCAACGCCACTGGTATATCCAGAGCACATGTGCCACCTCTGGGGAAGGACTATATGAAGGGCTGGACTGGCTCTCCAACAATATAGCTAACAAGGCTTAAGGGACATTTTGTGGAATGCCGCTATCTTCTTGCTTGGCTTTACGATT
Gma.1630.2.S1_a_at	BI424237	At5g14670	5e-60	Intracellular Traffic			GCTGGGAGAAATTGTCACAACCATTCCCACAATTGGATTCAATGTGGAGACTGTGGAATATAAGAATATTAGCTTTACTGTATGGGATGTGGGTGGCCAAGATAAGATCCGTCCTTTATGGAGACACTACTTCCAAAACACTCAGGGGCTTATCTTTGTTGTGGATAGCAATGATCGTGACCGTGTAGTTGAGGCTAGAGAT
Gma.2138.1.S1_at	AB040543.1	At3g09800	7e-65	Intracellular Traffic			ATATGGCATTTCACAATGACGGAGGAAACTTGTCTTTAGGTTTTTCCTATAAACGTTTATAAGAAAGAACCTCATTGCATTCTCGAGAAGTCGAACCTGGATGTTGATGTTACTTGCGTAGTGAAAGTTAATATTGACATGCTAATACAGGCTATTCTAGCAGTACTTTTCTTCTGGCGATTTGTTATTTTAGTTACCTATTAAATTTCAGGATGGTGGCATATTCCGTATGTTCCAAAAATTTCA
Gma.2443.1.S1_at	BQ081268	At1g27970	7e-55	Intracellular Traffic			CTCGCCAATCTCTACCAGGAAGGTTCCATGCTCTCTTTCGAGGGTCAGAAGATCCAGGGCTCCCACAACATCGTCGCCAAACTCACCTCCCTTCCCTTCCAACAGTGCCAGCACTCCATCACCACCGTCGATTCTCAGCCCTCAGGCGTCAACGCCGCCATGCTCGTCTTCGTCAGCGGCAACCTCCAGCTCGCCGGCGAACAACACGCCCTCAAGTTCAGCCAAATGTTCCATTTGATACCAACACCACAGGGAAGCTATTATGTGTTGAATGACATATTCCGGTTGAACTATGCGTGAAAGATAGACCTCTGAGTATGTTGACATTTGCCTACAGCTGTTTTGCTTCAGACATTTGCATTTGAGAATTAACGAGTTCATTTTGGTTCGTGTTGAACG…
Gma.2369.1.S1_at	CA802514	At5g61790	1e-88	Intracellular Traffic			ATTCCCTTCCTGAGTGCCTACAAGCTTAAAATATACGATGTCATTGAGAAGGGTCAAGAGCAACCAAATCTCACTGTTGGAATTGTTGTAGCCGTTGTGGTTGTCATCGTGTCAGTTTTCTTGAGGCTCATATTTGGTGGGAAGAAGAAGCCCACAAGGGTGGAGAAGACAAACGTAGAACCAGCAGAAACTGCAACTAGCCAAGGCAGTGGTGAGAATGAGGAAAACAAAGAGAAGGAGGAATCATCTGCCCCTGCACGTCGGAGGCCAACAAGGAGAGATAATTGAAGAAATGATTGAAACTTAACAGACAGGGGCGGCCATTAAAGAACACTACCGCACATAAATTTTGAGCTTAGTTTGGGCATTAGGCCAATTCTGTAGTAGCAGGTTGTTGTA…
Gma.2369.1.S1_s_at	CA802514	At5g61790	1e-88	Intracellular Traffic			TATACGATGTCATTGAGAAGGGTCAAGAGCAACCAAATCTCACTGTTGGAATTGTTGTAGCCGTTGTGGTTGTCATCGTGTCAGTTTTCTTGAGGCTCATATTTGGTGGGAAGAAGAAGCCCACAAGGGTGGAGAAGACAAACGTAGAACCAGCAGAAACTGCAACTAGCCAAGGCAGTGGTGAGAATGAGGAAAACAAAGAGAAGGAGGAATCATCTGCCCCTGCACGTCGGAGGCCAACAAGGAGAGATAATTGAAGAAATGATTGAAACTTAACAGACAGGGGCGGCCATTAAAGAACACTACCGCACATAAATTTTGAGCTTAGTTTGGGCATTAGGCCAATTCTGTAGTAGCAGGTTGTTGTAATTTTTCCCTTCACCTTTTGAAAGATGATAT…
Gma.2787.1.S1_s_at	BG510112	At1g10290	1e-112	Intracellular Traffic			ACACGCCAATTGAGTATTCATGACACCCGAGCAGCAGCTGCCTCTGGCTGGTCAAATGGTAGTGCAGAGAGTAGCCCAAGAAGCAGCAGCGGACCTGGTGATGACTGGAGATCTGCCTTTGATGCAGCTGCCAATGGCCCTGTTAGTCGAAGTGGTTCATCAAGATCGGGATCCAATGGTCACAGTCGACATTCTAG
Gma.3568.1.S1_x_at	BI941735	At2g44610	1e-102	Intracellular Traffic			AACTAGTGCTAAGGCTGGGTTTAATATAAAGGCCCTATTTCGAAAAATTGCTGCAGCACTACCTGGAATGGAAACACTATCTTCTGCAAAACAAGAAGACATGGTTGATGTAAACTTAAAGTCTACAAATGGCAGTGCTCAGTCTCAACCTCAGTCAAGTGGATGTGCTTGTTAAGTATACTTTATCATGTGCGGTCCACCTTTTTGTGTCATGCTTTTTGTTTTATGCGGGTTTTTCTATAGTCTTCTACAGCATTATATGAAAAGATGAAAGAATATATAAGCGGATCAGGGTAGGGGTTGATAAAAGTTCTGTCTAGACAATTTCTGTTGTTAGTTGGTTTTTTGCCTATAATGTGTACTAATGAATTTTTTTTTTTTNNNGAACGGCATAATGTA…
Gma.3568.2.S1_a_at	BM308236	At2g44610	9e-71	Intracellular Traffic			GAAAAGACAAGTCTCTATAGAGGAAGGAGAAGCAAAAGCACGTGAGCTCAATGTCATGTTTATTGAAACTAGTGCTAAGGCTGGGTTTAATATAAAGGCCCTATTTCGAAAAATTGCTGCAGCATTACCTGGAATGGAAACACTATCTTCTGCAAAACAAGAAGACATGGTTGATGTAAACTTAAAGTCTACAACTGGCAGTGCGCAGTCTCAACCTCAGCCAAGTGGATGTGCTTGTTAANTATACTTTATCATGTGCGGTCCACCTTTTTGTGTCAT
Gma.3568.2.S1_at	BM308236	At2g44610	9e-71	Intracellular Traffic			GTGTCATTCCTTTTGTTTTATGCAGATTTTTCTAGTCTTCTACATCATTATATGAAAAGATGAAAGAATATATAAGCGATCGGGGTAGGGGTTGATACAAGTTGTGTCTAGAAAATTTCTGTTGTTAGTTGGTTTTGCCCGTGATACTGTGTACTAAAGTAGTAAAGCTGCCCAACCAAAGATTGAATTATGTTCATTGTAACCCTGTA
Gma.3977.1.S1_s_at	BG238427	At3g56190	3e-97	Intracellular Traffic			ATTGTACTACTATGTGTGTCTGTCCAGTTGTTCGTCTTACACATCCACTTACAGAGTGTACCTGCTTTGGTTTTAATTGA
Gma.3839.1.S1_a_at	CD391787	At1g60780	1e-156	Intracellular Traffic			TATCAGGCTCTTCCATGGGTGAGATACATAAC
Gma.385.1.S1_at	BE347563	At1g68090	8e-97	Intracellular Traffic			GGGCCTTTGAACATGCACTTTTGACAATAATCCAATGTGCTGTTAATCCAGGAAAGTATTTTGCAAAGGTGTTGCATAAGGCGATGAAAGGCTTGGGGACTGATGATTCCACACTCATTAGGGTCGTTGTGACAAGGACTGAGGTTGATATGCAGTATATCAAAGCTGCATATTTAAAGAAACACAAGAAGACTCTGAACGATGAAGTACACTCAGAAACATCCAGTCACTACAGGACTTTTCTTCTCTCACTTTTGGGCCCTAATCACTAGCCAAGATGTTCAATGATGTAAGTGGAATAAATTCACCCTTGATGTGTAAATTTGACTGTTTTTAGTGCTTTGTGATCAATGTAGCCGACAACTTGT
Gma.4268.2.S1_a_at	AW569523	At3g18820	4e-62	Intracellular Traffic			GAAGAACTCTCTTGAAGGTCATCATTCTCGGTGACAGTGGGGTGGGGAAGACATCTTTGATGAACCAATATGTGAATAAGAAGTTTAGTAATCAGTACAAGGCAACCATTGGAGCGGATTTTTTAACCAAAGAAGTGCAATTCGAAGATAGGCTTTTCACCTTACAGATTTGGGATA
Gma.4790.1.S1_at	BM270023	At2g45140	6e-80	Intracellular Traffic			TACGTAGTTCTTGTTGGCATCATTGGACTCATCTTGGGTTTCCTNTTGAAGAGGACGTGACCTGAGTGATGGCCAAGTTCTCNNCAAAANGNGATCAATTGTAGAAAGCAACAAGAANTATGTGCGATGATGTGNAAAAACCAANTTGTTGTCTTATTGTCGTGTATTGCTCCTACAAATTTGGAATGTGTGGTCAAAAAATAGGTACTTNTATCAGCCATAGCAATCATAGACANGTGGACAAATTTGTATCATGGGAAGTGTATTGTTATCTGNTNTGGTACATGTGATCAATTCTTTAGTAGTTCCTA
Gma.4707.2.S1_at	CA783500	At3g62290	1e-100	Intracellular Traffic			TCTTCATTCTCTTCGTCAGCGTCACTGGTATATCCAGAGCACATGTGCCACATCTGGTGAAGGGCTTTATGAAGGGCTTGACTGGCTCTCAAACAACATTGCAAACAAGGCATAGTGATTATCGGTCATGGGTTGCATCAAAGTTCATTTGAGTTTAGCGGTTGTGACTTCCAATGTTTGATGTGCTTACCCTGTTTAGAATCTTATTTTCTCTAGCATGTATTATTTGTCTTCGATAAAGAACAGATTGTCTACTACCTAATATCAAAATAATTTGCATTTTTTCTCCGTGTANAACCAAAAGGCATTTGTCTTACCCATCGATTTGTGA
Gma.5383.1.S1_a_at	CD392823	At3g13772	1e-109	Intracellular Traffic			GATCCTATTAATCACCTGTGCCGAGATTACCATTGTGCTTTGCTACTTCCAATTGTGCAGTGAGGATTACAATTGGTGGTGGAGATCTTATCTCACTGCTGGGTCCTCTGCGTTGTACCTCTTCCTCTACTCAATTTTCTACTTCTTTACCAAGTTGGAGATTTCAAAGCTGGTATCGGGCATCCTTTACTTCGGGTACATGATAATTGTTTCATATGCCTTCTTTGTGTTGACGGGAACTATTGGCTTCTATGCTTGCTTCTGGTTTGTTCGCAAGATCTACTCGTCGGTGAAGATTGACTGATTTCAGGCA
Gma.6613.2.S1_at	BG789774	At5g65020	1e-121	Intracellular Traffic			ACAACAATGAGTTCGGGAATGCCATAAACAAGGATCTGAAAACNGATCCAAAAGATGAATATCTGCAATTATTGAGGGCAGCCATTAAGTGCTTGACTTACCCTGAGAAATATTTTGCNAAAGTCTTGAGGNTGGCTATAAACAAGCTNGGAACTGATGAAGGGGCCCTTACTAGAGTGGTGACNACCAGAGCTGAGGTTGATTTGCAGCGAATTGCTGAGGAATACCAAAGAAGAAANAGCATTCCTCTGGACCGCGCAATAGCCANTGACACTTCTGGAGACTATCAGAGCATTCTCCTTGCACTGGTTGGACATGAGGATTAAGTNTTCTTTCTTANNCTNTTCAGTTGTCATGGGATTGNTNNTTAGGCTATTTGCTTTTCCTCTTATCATGAAT…
Gma.6207.1.S1_s_at	CF922738	At5g45130	2e-89	Intracellular Traffic			GAGAGGTACCATAGCTTGGCTCCCATGTATTACAGAGGNGCTGCTGCTGCTATCATTGTCTATGACATCACTAGCTCGGACTCCTTTACCCGAGCTAAGAAGTGGGTCCAAGAGCTTCAAAAGCAAGGGAATCCTAATATGGTCATGGCTCTTGCTGGTAACAAAGCTGATTTGGAAGATAAGAGGAAAGTGACAGCTGAAGAAGCACGTGTATATGCTGAAGAAAATGGTTTGTTTTTCATGGAGACCTCTGCCAAA
Gma.6298.1.S1_s_at	BM309168	At3g62290	1e-100	Intracellular Traffic			TTGATGCTTTTTGGGAGTCTTCTTGTGGATTGGTGATTCTGGAT
Gma.7182.1.S1_at	CD404103	At1g14830	3e-34	Intracellular Traffic			ATGTTAATTCCTATATCGGTATGGTTTGCGATACACTTAAGAATACTATACCAAAGGCCGTGGTTCATTGTCAAGTTAGAGAGGCTAAGAGATCATTGCTAAACCACTTTTATGTTCATGTTGGGANNANGNNNNNGGAGAAATTGGGTGCTATGTTGGACGAAGACCCNGCCCTTATGGANAGGAGAAATCAAATAGCTAAAAGGCTTGAATTATACAAGCAAGCTAGGGATGATATTGACTCCGTGGCTTGGAAATAATGAGATCCCAGGGTTTGCAACAGATGTTACGAGCAAGATTTGTTATAGAATTGATCATTCTTACTATTTTTTAATCAAACACGAACAGAAAAGTCTACGGTTATGGCAAGTTGAATTCGCACTTGCGAATAATTCTTTT…
Gma.7352.1.S1_at	BI701939	At4g04910	1e-141	Intracellular Traffic			TTGCTTGTTACTGTTCAGTTGCAGAGTTTGTGTGTTGCTTGGTTGTGCTGATAGTAATTTTTAGAGGAGACGGGTTTCATAGTTTCTTGTTTTTATCTTTAGGGTTATTACTTAGTTGGAATTGTGCTGCTCTCAAACTGTAATGACCTTTATTGGGGATTCATCATTATCCAAACGTCTTATATTGAGGT
Gma.7277.1.S1_at	CD407589	At4g34450	1e-127	Intracellular Traffic			TTGGTCCTAGAGAGAGCTTGGCTGAAGCTGTAAACACTGTTATCAACCTACTTGGCTTGGAGCCTTGTGAGGGCACAGAGGAGGTTCCACCCAATTCAAGATCACACACATGCTTATTGTCAGGTGTATTCATAGGGAATGTGAAGGTGCTTGTACGGNTGTCTTTTGGACTTGATGGTCCAAAGGATGTTGCAATGAAACTGTCTGTCAGATCAGAGGATGAAACAGTCAGCGATGCCATTCATGAGATTGTGGCAAGCGGCTAGTCCATTGAGTCAAGAAATGTTGACTCAAATCAGCCCCTTTTTTGGTTAATGAGATTGGAGTTTAGCAGGCATATAGATATTGACGTTTGTAAAGAATTTCAAAATTGTAATTGTTTGTCCTTCACTCACTGCA…
Gma.733.1.S1_at	BM178504	At2g45140	3e-60	Intracellular Traffic			AAGAGGGAAGGCAACAAAAGTCGTGGTGGAGTCTCATTTGTCATTGTCGTATTAATTGGCTTGCTTGGCATAATTATGGGGTATCTCATGAAGANNACCTAAGCATTTCTGCGATTCAATCTTTCACCATAGTTTTCGATCTTAGTTTCTTTGTTCCTNACNATTCAAGCAATNATGAGGAAAGTTAAAATAGATCAATTCAGCAGATGTTGGTTTTTCTTTTTNATTTTTGCNNTTTCTTTTCTTTTCTTTGGGTGGATAACATTTTGGANGTAGAAAACATTAGGGGAAGTTGTGGGTCTGNTGGTTAANCATATTGTGAACTGACTCATNCTTTCGTNAACNTGCATTCTTTTTGTAACTTAANGAGGGGAAGCTTCTTGTTTNCTTCTTTTTGTG…
Gma.7447.1.S1_s_at	BI967765	At1g01620	1e-138	Intracellular Traffic			CAAGACAAGGGCTTAGGCTCTTGTTTTTGTATGTGCTTGCTTGTATTAGTTGTTATTTATGTNTCTGGNGTCTTCTTCATTTNGAAANTTCATGTNAATCTTTTTGNNTTTNNNNTAATCCATTGTATGGATGTAAATTATGAC
Gma.6811.1.S1_s_at	CA935869	At5g12380	7e-98	Intracellular Traffic			GTGTGATGGTTGATGGTGTTAATCTGTGTTGATTTTGCTTGAGTCTGTTTTCAGTTTTCCTTGATCATGAGAACTTGGAGTTCTATCTTATAGAGTGGTAATATGATAGCTGTTTGGTGGCTTATAAATTATTANNAANAGGCTCAAAATAAAAGATATCTCAGTGGCCATTTGAATTTTTAAA
Gma.6811.2.S1_a_at	AW100836	At5g12380	5e-95	Intracellular Traffic			GCTACAGAGAGATCCATGGCACTTCCATCTCTAAGAAACTGGTGGATGAAGGATCTGATGAGTTTCAAAGGGCATTGTACACTGCCATTCGTG
Gma.6811.2.S1_at	AW100836	At5g12380	5e-95	Intracellular Traffic			ACTCACCCGTGTGGTCGTGAGCCGGGCTGAGAAGGACTTGAAGATAATCTCAGAGGTTTACTACAAGAGAAACAGTGTTCTTCTTGAGCATGCTATTGCCAAGGAAACCTCTGGGGACTACAAGAAGTTCCTTCTCACACTGTTGGGAAAAGAAGACTAAAAACTTTTCTTCGAGGGCATTTGTGATTATGAGTTTAGGACANTAAGCTATACTTGTGTGTGATGGTTTCATGTGTGTTGGTTTTCCTTGAGTCTGTTTTCANTTTTCCTTGATCATGAGAACTTGGAGTTTTATCTTATAGAGTATTAATATGATAGCTGCTTTGTGGCTTTTAAATTGAANAGGNTNAAAATAAATGATATCTCAGTGCCCATTTTATTTTAAA
Gma.6811.2.S1_x_at	AW100836	At5g12380	5e-95	Intracellular Traffic			GCTACAGAGAGATCCATGGCACTTCCATCTCTAAGAAACTGGTGGATGAAGGATCTGATGAGTTTCAAAGGGCATTGTACACTGCCATTCGTGGCATCAAGGATCCTATTAAGTACTACGAAAAGGTGGTGCGGAATGCAATCAAAAAGGTTGGAACTGATGAGGATGCACTCACCCGTGTGGTCGTGAGCCGGGCTGAGAAGGACTTGAAGATAATCTCAGAGGTTTACTACAAGAGAAACAGTGTTCTTCTTGAGCATGCTATTGCCAAGGAAACCTCTGGGGACTACAAGAAGTTCCTTCTCACACTGTTGGGAAAAGAAGACTAAAAACTTTTCTTCGAGGGCATTTGTGATTATGAGTTTAGGACANTAAGCTATACTTGTGTGTGATGGTTTC…
Gma.7062.1.S1_at	AW734156	At4g34450	1e-131	Intracellular Traffic			ATGTGAAGGTTCTTGTGCGGTTGTCTTTTGGACTTGATGGTCCAAAGGATGTTGCGATGAAACTTNCTGTCAGATCCGAGGATGAAACTGTNAGCGATACNATCCATGAGATTGTGGCTAGNGGCTAGTGCACTNNNTCAAGAAATGTTGNCTCAACTCGGCCTTTCTTTTTGTTACTGAGATTGGAGTTTAGCAGCCTCATAGATAGCCGTGTGTAAAAAGNATTGCAAAACTGTACACTTNNNANTATATGCAATTTATTGGTCNCCCATTNNGCATGCTTNGTTAGACNNGCAACAATACTTNCCAGTATTACGTTGGGTNTGTTGGAGTAAACTTCAATGGTGATGATTATACTTTTCATTTATTTGTAGCAACTGTAATACGAATTTTGG
Gma.7064.1.S1_a_at	BQ613120	At3g62560	4e-54	Intracellular Traffic			GCTCAGGTGGATGCTGTAGTGTACCTGGTTGATGCATTTGACAAGGAAAGGTTTTCAGTGGCTCTCTCAGTACATTAAATAGAGAACAAGTGTTTGCTCTTTATTATCCTCATGCTAATGTAGTCTCCACATTAGCGTATCTCTGCTCATGTAAATTGGATATACTTTAATGGTGGTTTTACTTTTTCTTTGTTATGAATGAGACATACTAGTTTCTAT
Gma.6851.1.S1_a_at	CD403658	At1g09630	1e-103	Intracellular Traffic			GCCGGACAGGAACGATACAGAGCAATTACGAGTGCCTACTACCGGGGTGCCCTTGGAGCTCTTCTTGTCTACGATGTCACTAAACCAACCACATTCGAAAATGTTAGCCGATGGCTCAAGGAGCTAAGGGATCACGCCGATGCTAACATTGTCATCATGTTGATCGGGAACAAGACTGATCTCAAGCATCTCAGAGCTGTTGCCACCGAGGATGCTCAGGGTTATGCCGAGAAGGAAGGCCTTTCTTTCATCGAGACTTCCGCTCTTGAAGCAACTAATGTTGAGAATGCTTTCCAGACTATTCTTGCAGAGATATACCGCATTATCAGTAAGAAATCACTCTCTTCCAATGA
Gma.6833.1.S1_at	BU545297	At5g11710	1e-28	Intracellular Traffic			GATTGATCTCAATATAACTGCTCCTAAAAAAGTATCCCTTGNGGANGTTGGAATTGTGGGTGGATTGAGTGATGGATCCGATGAAAGGGAGAAAGGCCCTCCACCTTCATTTTACATGGGGAGAGCTATGGGTTCAGGATCTGGTCTTGGAATGGGTAGGTCTGGATTCACTCCTTCACAGCCANNAGCTGGAGACGACTTTTTCTCAANCCTTNGNAACCAACAANATCAATTTGGTGGGTTCCAAAAGTAAAATTCTCAGATTTTATACTCTTCCCATCACATTTTCACNCATTCTTTNTGTNNCGGCATTACCAAGCTTGNNNAAGCTTTTTGGCATGGCTTTTTGTTCATATATATTTCTCCCAATATTGTGATTATATTATTTTAAATTTTAAG…
Gma.7813.1.S1_at	BU550409	At5g67560	1e-29	Intracellular Traffic			AAAGAAGCTTTGACCGACCAAATGGATCTGAAGTCAATTACTGACAGAGAAGTTTGCTGCTTCATGATCTCGTGCANAAACTCGACTAACATTGACTCTGTTATCGATTGNCTTGTAAAGCACTCCAAATCAAAGAGCTAAGAGGCTCCCTTATGTTTTGTACTCTAATGTAATTTCAGTGACATATATCTGGAAGTTGCTGGAGGCATCTGCATGGCTAACTTGGTTGCAGATTACTTTATTCCTGCCCTTTTCTCATTTGCTTCTTAATGTAATATCATGTCCAATGACGTGTATCAAACAAGATGAAATTCATGTCAAGGGTTGTTTTGTGCGTGAATCATATTGTCATTGTCAGTTTAGTTGCATTTTTAGAATACTTGCAGAACTGCAGTTGTG…
Gma.8407.1.S1_at	AW348317	At1g10630	1e-100	Intracellular Traffic			GGAGGCATTATTTCCAGAACACTCAGGGTCTCATTTTTGTGGTTGATAGCAATGATAGAGATCGAGTGGTTGAGGCAAGGGATGAGCTGCACAGAATGTTGAATGAGGATGAACTTAGAGATGCTGTTTTGCTTGTTTTTGCCAACAAGCAAGATCTTCCTAATGCAATGAATGCTGCAGAAATAACTGACAAGCTTGGACTTCATTCACTCCGTCAACGCCACTGGTATATCCAGAGCACTTGTGCAACTTCTGGAGAGGGTCTCTATGAGGGTTTGGACTGGCTTTCTAACAACATTGCCAGCAANGCATGAGACATTTGAAAAATTTTGGTCTTGTCTGGTGATTTCNTGCNGAGTCTGGCGGTTCTTGGAGAAAGATGCTTATCTTTTCTAGCGA…
Gma.8407.1.S1_x_at	AW348317	At1g10630	1e-100	Intracellular Traffic			GGAGGCATTATTTCCAGAACACTCAGGGTCTCATTTTTGTGGTTGATAGCAATGATAGAGATCGAGTGGTTGAGGCAAGGGATGAGCTGCACAGAATGTTGAATGAGGATGAACTTAGAGATGCTGTTTTGCTTGTTTTTGCCAACAAGCAAGATCTTCCTAATGCAATGAATGCTGCAGAAATAACTGACAAGCTTGGACTTCATTCACTCCGTCAACGCCACTGGTATATCCAGAGCACTTGTGCAACTTCTGGAGAGGGTCTCTATGAGGGTTTGGACTGGCTTTCTAACAACATTGCCAGCAANGCATGAGACATTTGAAAAATTTTGGTCTTGTCTGGTGATTTCNTGCNGAGTCTGGCGGTTCTTGGAGAAAGATGCTTATCTTTTCTAGCGA…
Gma.8717.1.A1_s_at	BU761149	At5g46630	1e-130	Intracellular Traffic			TCTGGTTTACGTGTCCGTTTCCTCAAGGTGTGGGAGAAGAGTGGGTACAATACCGTTGAGTGGGTTCGTTACATTACAAAAGCNGGATCCTACGAGATTAGGTGCTAGACANANTTNGTANNTTNCTGGNTGGAGANTGAAGCNAAAATCCCNAATAAGNCGCAGTNCAGGCTAGTNATCCNAGNTTTCGTATTGTATTAAACATGTAATGANNNAAGGTTCAGGAGTTACTCAATGTGCTGTCAGTATGATT
GmaAffx.32618.1.S1_s_at	BM271526	At3g07680	2e-24	Intracellular Traffic			CAGACTGACCGCCAAGCAATAGTGAACGATGCAATGAGCAGAAGAGCAGTACACAAGGCAATTTTTGAATCAGCAGCACTGATTGGGGCTAGTGCGCTGCAAGTCTACCTTCTGCAGCGATTGTTTGAACGAAAGT
GmaAffx.1301.22.S1_s_at	BI945611	At1g35720	3e-20	Intracellular Traffic			ACACCACCGGTGACTATGAGAAAATGCTTGTGGCGCTTTTAGGACATGATGATGCTTGACATACTCCTTTGTGTTTGTGTGTGTGTACTTGTGGCAGAGTTACTATATAGTGTGCAGTGTACTGCTTTGTGGTTCCAT
GmaAffx.1301.59.S1_at	BI974591	At1g35720	4e-47	Intracellular Traffic			ATGGCGACACTTAAGGTTCCTCAGCCTCTTCCCCCCGTTGCAGATGATTGTGAGCAGCTCCGAAAAGCCTTCTCAGGTTGGGGAACTAACGAGGAGCTGATTGTATCGATCTTGGCTCATAGGAATGCTGCTCAGAGGAAGCTTATCAGAGAAACTTATGCCCAGACCTATGGAGAAGATCTCCTCAAGGCCTTGGACAAAGAACTCACGAGTGATTTTGAGAGGCTGGTTCATCTTTGGACACTTGATTCTGCTGAACGTGATGCATTTTTGGCAAACGAGGCGACTAAAAAATGGACTTCAAGCAATCAGGTTCTGGTGGAAATAGCCTGCACTA
GmaAffx.1112.1.S1_at	CD396251	At5g61790	2e-06	Intracellular Traffic			AGAAGACAAACCCAGAACCCGCAGAAACTGCGAGTAGCCAAGGCAGTGGTGAGAATGAAGAAAACAAAGAGAAGGAGGAATCATCTGCCCCTGCACGTCGGAAGCCAACAAGGAGAGACAATTGAAATGATTGAAACTTGACACAGACAGGGGCGGCCATTAAAGAACACTACCGCACATAAATTTTGAGCTTAGTTTGGGCATTAGGCCAAATACCGTAGTAGGTAGCACGTTCTTGTCATTTGTCTCCTGCACCTTTCGAAAGATGATATTGCATAAGGGAGTGTAGATCAGATATTTTGTGTCGTGCTGATGATCACTTTGGAGACTTGAGCATTTTAAGCTAATTGAGGCTGTACATCAC
GmaAffx.1729.1.A1_at	BI426505	At2g17380	2e-14	Intracellular Traffic			GGAAGAAGTCAGTTCATTAAGTAATATAATTGCACAAGCNNNNNANNNNNNNNAACAAATGNTNCANTTNCCTGCTCCTCATATAGTATGTCGAATTGTCAATGTCCGATTTTACTGTTACTAAGTTGTCTTTCTTGATGTTGTCTTTCTCACATATCATGTTTGTGTATGCCTGAACTGTATTACTTGTTGTGGTGAGATTGAGCCCCCAGGGTTACTTTTACTTTGCATGTTCTGAGATTGAAATTGAATAGATTCCTTGGTAATATCCTTTTTCTTTTTCCCATTTTGTAATATATTGTTTGCTATAAAGAGTTTGTAAGAATGATTAGAAATTATTTTAATAGGTAGAGTATTATTTTCATGGATAANAAANNANNNNAAANAANNNCTNNNNNN…
GmaAffx.5931.1.A1_at	BI967201	At3g03120	8e-25	Intracellular Traffic			ATATAGCATACTTTTCCTCTTGAAAAAAATNTTCTCCTCAAACAATGAGTTTTGCATTGTGCTCTAGTGTGGTTATAATTGTTAACATTTTCTTTTTCTTTTGTAGAGAGGGGCAATGACGCCAATGGAAGTGTGTGAAGNACTAGGTCTCTTTGATCTAAAGAATAGAAAATGGCACATACANGGCACTTGTGCACTNAAGGGAGATGGTCTTTATGAGGGCCTGGACTGGTTGGCTTCAACACTGAAGGAAAGAAAAGCTGCTGGATACTCTTCAATAGGAACCTCATCCTTCTAATNTAGGTATNNNNNNNTTTGTCATTGAGGAACGTGCAGGGTTTGGCCAGTTTCANTCAAGGATGTTGTAAAAAAGTAATCAANTTTNNNGAGTTNCATTNN…
GmaAffx.82790.1.S1_at	BM893351	At1g65320	2e-31	Intracellular Traffic			TTCATTGGCTGCAGTATTGGCTCAGATGCTATCTCACAGGGCAACTCATGTCTGGGTGACCGAGGACGAGAACGATGAAGTTTTGGTCGGTGTGGTCGGATATGCTGATATTTTAGCTGCTGTAACCAAACCACCTACAACCTTCATTCCTGCTAATAGATCTACAGAGGGGTTTGGAAATGAAATNCNNNNNNNNANNTTTTGCTTCAACTTTTTCAATTAGTACTCTTAGCAGTTTGTCTCTTTGGTGCTCAATCATCTCACAGTACATTAAGATGAAAAACGAGTTTGGATTGTTGGTTTGTACA
GmaAffx.89819.1.S1_s_at	CK606604	At3g18820	2e-64	Intracellular Traffic			TTTCTGATTCAAGCAAGTCCTTCCGATCCAGAGAATTTTCCTTTTGTTGCCATAGGAAACAAAATAGATATTGATGGTGGAAACAGCAGAGTGGTGTCAGAAAAGAAGGCTCGGGCTTGGTGTGCGTCAAAAGGAAATATTCCATATTTTGAGACATCTGCCAAAGAAGGTATTAATGTTGAAGAAGCATTCCAATGCATAGCAAAGAATGCCCTGAAAAGTGGAGAAGAAGAAGAATTATACCTGCCAGACAATTGATGTTGGAAACAGCAGTCAGCCACGGGCAACAGGATGTGAGTGCTGAATGTATAGGTTTTCTCTTCAATACAATAAAGTACATTACTTCAAATTGATTTCACTGTGTTTAGCCATTGCTGTCTATGTGGAGGCATCATTGTA…
GmaAffx.90362.1.A1_at	CF806087	At1g11890	5e-29	Intracellular Traffic			AAACTATGGTGATCGAGCTCAGTATGAAATTTAAAACCTGGATTCTGTGGCTTCTTGCTTTTCTCACATGATTATCCAGATTTGCACAGATTGGTGGGAACCCTTTATGCATGAGATGATGTCAACTTTTTCTTGACAACTTCGGTTTAGAAAAAAAAAAAGACTATCCTTTGTTACATCTGGATCAGTCTTTCTGGAACAGGAACCTTTTGACCTTTATAGTAAGGAGCCAGGATATGAGAAAACTTTATCCCCGTGGGGATGCATGTAGGCATTTCTTCTTTATACTTCTCAA
GmaAffx.89049.1.S1_s_at	CK606168	At2g38750	2e-94	Intracellular Traffic			ACATCTCCAGGCAGTTTACAAGCACTATAAAGAGATATCTGGCAAGAACCTTGATGAGGATCTTGATGATTTAAGATTTAAAGAGGCTGTGCAATGCCTTTGTACCCCACAAACATATTTCAGCAAGGTTTTNNATGCAGCATTGCGAATTGATGTGGACAAGAATACTAAGAAATCGCTTACTCGTGTCGTTGTTACTCGAGCTGATATTGATATGAAAGACATAAAGGCAGAGTACCATAATCTATATGGGGTTTCTTTACCCCAGAAAGTTGAAGAGGTTGCTAGAGGGAGCTACAAGGATTTCTTACTAAACTTGATTGTTAGAGGAGGCTAATTGAAGAAATTGAAAAGAGAACAAAAACTTGGAAGATCAAATAAAAAAGGAAAATTTTTTCC…
GmaAffx.87115.1.S1_at	BI970509	At3g60860	3e-25	Intracellular Traffic			TTGTTGTGACCACTCTTCAAGCTATTTGTAATTTGGGAGAGATATCTTTCGAGAAGAACCTGGCTCATTTTTTCCCTCTCCTCTCAAGCTTGATAAGTTGCGAACATGGATCAGCTGAGGTTCAGGTAGCTCTCAGTGATATGCTTAGTTTATCAGTTGGTCCTCTTTTGCTACGGTCATGCTGATTGATTACGTTAAGATCGACAATGAATTTTGAGATATAGGATATTTTTCCTCTAAATCTCTTTTGTTCATATTTTCCTCCTTTCCTTTGCCTCGGGTTACTTGCAAAAGTATAGTTCGATAGTGTTTGAATAGTTGGCAGTGATTTTGTGTTTAGAATACCTTCCCGGTCCTTCTATATTTTAGAAGCCTAAGATTACCAATCCGAATTGATCT…
GmaAffx.93603.1.S1_s_at	CF809328	At5g01600	4e-49	Intracellular Traffic	Ionic Homeostasis		CCCATTTGGTTATTTCGCCCTAATGGCTCTTGCTCCATCCAAAGTTTCCACCTTTTCTGGTTTTTCTCCCAAACCCAGTGTTGGGGGTGCTCAGAAAAACCCAACTTGCTCTGTTTCTCTGAGCTTTTTGAATGAGAAACTTGGAAGCAGAAACCTTAGGGTTTGTGCCTCAACGGTGCCTCTCACTGGGGTGATTTTTGAACCGTTTGAGGAGGTTAAGAAGAGCGAGCTTGCTGTTCCAACTGCTCCCCAAGTCTCGTTGGCTCGTCAGAACTACGCTGATGAGTGTGAATCTGCGATTAACGAGCAGATAAATGTGGAATACAATGCTTCCTACGTGTACCACTCCTTGTTTGCATACTTTGACAGGGACAACGTGGCTCTCAAGGGATTTGCCAA…
GmaAffx.92005.1.S1_s_at	CF807730	At1g30630	1e-108	Intracellular Traffic			GATCCATGACGACGCTCCCACACCTCTCCAAGCCGTCAAACTCCTCGCTCTCTATTTCTCCTCCCCCGACACCAAGGATTCCGCCATCGCGAGTCTCAAGGAGTGGCTTGCCGATCCCGCCATTGCAAACAACGCCACGCTGAGGCTCGTCGCCGGTCTCGTCTTCCTCCATGAAAATGATTTCAACGAAGCCCTC
GmaAffx.92436.1.S1_s_at	CF806104	At4g09160	7e-54	Intracellular Traffic			GAACAGGAATTCACCTCTGCTTACCCTGTTACGGAGTTTACTATTAAACCCGCTACCAAACATTCTGTTGAGTTCCCTGTTTCTGAGAAAAGCCATCTTGTTTGGGAAATCCGAGTGGTGGGTTGGGATGTCAGCTATGGAGCTGAATTTGTGCCCAGCGCTGAGGATGGATACACTGTCATAGTACACAAGAGCAGGAAAATTGCTCCCGC
GmaAffx.91556.1.S1_s_at	CF807281	At2g32670	1e-90	Intracellular Traffic			AATATTGAGAAGGTTCTTGACCGTGGGGAGAAAATTGAGCTTTTGGTGGATAAAACAGAGAACCTTCGCTCTCAGGCTCAAGATTTCAGGCAGCAGGGAACCAAGATTAGGAGAAAGATGTGGTTCCAAAACAT
GmaAffx.91170.1.S1_s_at	CF806895	At5g59840	6e-75	Intracellular Traffic			GAACTATTACCACAGCTTATTACCGTGGAGCCATGGGTATCTTGCTGGTTTATGATGTTACTGATGAAGCATCTTTCAATAATATTAGGAATTGGATCCGCAATATTGAACAACATGCTTCTGACAATGTAAAC
GmaAffx.91121.1.S1_at	CF806846	At3g07680	6e-78	Intracellular Traffic			TCGTTGTTATTAAGGCTGATTCTCCCTGGCATTACGGCGACGAAGGTGTCGATCTCGTGGTAAAGGGACCTTCTGGCGAGCAAATTCAAGATTTTCGGGACAAGACCAGTGAGAAGTTTGACTTTGTGGCTCACAAATCCGGGGTCCATAAATTCTGCTTCACCAACAAGTCTCCTTATCATGAAACTGTCGATTTTGATGTACATGTTGGTCACTTCTCTTACTTTGAGCAACATGCAAAAGATGAGCATTTCACCCCCTTGCTGGAGCAGATTGGGAAGTTGGAGGAAGCTCTATATAACATTCAGTTTGAACAGCATTGGTTAGAGGCTCAGACTGACCGCCAAGCAATAGTGAACGATGCAATGAGCAGAAGAGCAGTACACAAGGCAATTTTTG…
GmaAffx.90954.1.S1_s_at	CF806679	At4g30440	1e-113	Metabolism			TGCAAACCGGGTTGAAGAAGTTCGTCAAGTGGTACCTTTCCTATTACGGCTACAATCACGGCAAACCTGTAAATTAAT
GmaAffx.90963.1.S1_at	CF806688	At4g13940	1e-109	Metabolism			TCCAGACCGCCGTTCTCATTGAGACCCTCACCGCCCTTGGCGCCGAGGTCCGCTGGTGCTCCTGCAACATCTTCTCCACCCAGGACCACGCCGCCGCCGCTATTGCCCGCGACAGTGCCGCCGTCTTCGCCTGGAAGGGTGAGACCCTCCAGGAGTACTGGTGGTGCACCGAGCGCGCCCTCGACTGGGGCCCCGGCGGTGGACCCGACCTCATCGTCGACGACGGTGGTGACGCTACCCTTCTCATCCACGAAGGCGTC
GmaAffx.90963.1.S1_s_at	CF806688	At4g13940	1e-109	Metabolism			ACTTCGGCCGCCTCGAGATCGAGCTGGCCGAGGTCGAGATGCCCGGCCTCATGGCCTGTCGGACCGAGTTCGGCCCCTCCCAGCCCTTCAAGGGGGCCCGCATCACCGGCTCCCTCCACATGACCATCCAGACCGCCGTTCTCATTGAGACCCTCACCGCCCTTGGCGCCGAGGTCCGCTGGTGCTCCTGCAACATCTTCTCCACCCAGGACCACGCCGCCGCCGCTATTGCCCGCGACAGTGCCGCCGTCTTCGCCTGGAAGGGTGAGACCCTCCAGGAGTACTGGTGGTGCACCGAGCGCGCCCTCGACTGGGGCCCCGGCGGTGGACCCGACCTCATCGTCGACGACGGTGGTGACGCTACCCTTCTCATCCACGAAGGCGTCAAGGCCGAGGAGC…
GmaAffx.90936.1.A1_s_at	CF806661	At4g24160	7e-71	Metabolism			TACAAGTGCTAGGTTTGGTACACATTCAACTGGGGAAATACTGACTGAAGAGGAATCAACATTGCTGACAGACTATGTTTACCACACATTGGCGGCCAAAGCTAGTGGAGAGCTGTGCTTAAAATATATTTTTTCATTTGGAGCATTTGCTAGGATGCCCCTTCTTCTCAGTGCCTCAGAGTGGAAGGTGCCCACCACTTTCATGTATGGTTTCCAAGACTGGATGAATTATCAAGGTGCCCAAGAAGCTCGCAAGCATATGAAGGTTCCATGCGAAATCATCAGGATTCCTCAGGGTGGGCACTTTGCGTTCATTGACAACCCAACTGCCTTCCATTCAGCTGTTTTTTATGCTTGTCGAAGGTTTCTTACACCTGATCCAGACAATGAATCTCTTCC…
GmaAffx.90733.1.A1_s_at	CF808300	At5g15490	1e-112	Metabolism			ATAAGGCCAACCTGAGCATATACGATCCACAAGTAACTGAGGACCAAATTCAGAGGCATCTATCNATGAACAAGTTTGATTGGGATCATCCTATCCACTTGCAGCCCACAAGTCCTACTACTGTGAAGAAGGTCAGTGTTGTTTGGGATGCCTATGAAGCAACAAAGGATGCACATGGCCTTTGCATTCTAACCGAGNGGGATGAGTTCAAGACTCTTGATTACCAGAAGATATTTGACAACATGCAAAAACCAGCATTTGTTTTTGATGGCAGAAACATTGTGGATGCTGATAAGTTGCGTGAGATTGGCTTCATAGTTTACTCAATTGGTAAGCCCCTGGACCCATGGCTCAAAGACATGCCTGCTGTGGCATAAAATAGATCATTGATCAAGTACA…
GmaAffx.91462.1.S1_s_at	CF806716	At4g01850	1e-113	Metabolism			GCGACCAAATCTCCGATGCTGTCCTCGACGCTTGCCTNGANCAGGACCCAGACAGCAANGTTGCCTGCGAAACATGCACCAANACCAACTTGGTCATGGTCTTCGGAGANATCACNACCAAGGCCAACGTTGACTACGAGAAGATNGTGCGTGACACCTGCAGGAACATCGGCTTCGTCTCAAANGATGTGGGACTNGATGCNGACAACTGCAAGGTCCTNGTNAACATTGAGCAGCAGAGCCCTGATATTGCNCAGGGTGTNCACGGCCACCTTACCAAAANACCNGANGAAATNGGTGCTGGNGACCAGGGTCACATGTTTGGCTATGCCACNGANGANACCCCNGAATTGATGCCATTGAGNCATGTTCTTGCAACNAAACTCGGTGCTCGTCTCA…
GmaAffx.91462.1.S1_x_at	CF806716	At4g01850	1e-113	Metabolism			GACTGTTGAGTATTACAATGACAACGGTGCCATGGTTCCAGTTCGTGTCCACACTGTGCTTATCTCCACCCAACATGATGAGACTGTGACCAACGACGAAATTGCAGCTGAC
GmaAffx.92410.1.S1_s_at	CF808078	At1g51410	1e-118	Metabolism			TGACCTACTTGACCCAGCAGTGAAGGGAACTCTTAACGTTCTTAAATCATGTGTAAAATCGCCATCTGTGAAACGAGTCATCTTAACATCTTCTGTGGCTGCAGTTGCATATAATAAAAGGCCTAAAAGTCCTGAAGTTGTAGTTGATGAAACCTGGTGGTCTGATCCAGATTACTGTAGGGAATTAAAGCTGTGGTATTTACTTTCAAAGACTTTGGCTGAAGATGCTGCCTGGAAATTTGCCAAAGAAAACGACCTTGACTTGGTTGTTGTTAACCCAGCAATGGTTGTAGGGCCTCTTTTGCAAGCAGAGCTTAACACTAGTGCTGCTATTATTTTAAACCTAATAAATGGTTCAGAAACTTTTTCAAATGATACATATGGATGGATCAATGTGAA…
GmaAffx.92525.1.S1_s_at	CF808250	At2g45550	2e-46	Metabolism	Cytochrome P450	CYP76C	TGTTTCTAGATTTATTTGTGGCTGGAATAGACACAACATCAAGCACGATAGAATGGGTAATGGCTGAGTTGCTACGTAACCCTGAAAAACTAGAAAAAGTTAGGCAAGAGCTTCAACAAGTCCTTGCCAAAGGTGAACAACTAGAAGAATCACATATCTCGAACCTTCCTTACCTACAAGCAGTGGTGAAAGAAACTTTTCGCTTGCATCCACCCACCCCAATGTTACTGCCACACAAGTCAGAAGTCGATATTGAACTATGTGGCTTCATGGTGCCT
GmaAffx.92722.1.S1_at	CF807561	At1g47480	7e-65	Metabolism			CTCGAAGCCAATTGGGTCGGAGGCTGTTGAGGGGCACGAGCAGAGTTTGGCCATGAAGGTCTGGAACTTTGCCTGCCCTGATGCCCCCGGTGGAATCGATAACCCCTGGATCAACCCCTGTGTTCCTGGGGCACCCTCTTTGGCCACTCTTGCCTGCTCTAAGTTGCTCGTTACTATCACTGGCAAAGACGAGTTCAGAGACAGAGATATTCTCTACCACCACACCGTTGAGCAAAGTGGCTGGCAAGGTGAACTTCAACTCTTTGATGCTGGCGATGAGGAGCATGCTTTCCAGCTCTTCAAGCCTGAGACTCATCTTGCTAAAGCCATGATCAAACGCTTGGCTTCTTTTCTGGT
GmaAffx.92834.1.S1_at	CF808559	At5g28050	6e-81	Metabolism			GCGAGGCACTGGATTCTACCAGAAAGCACAATTGNAGATTAAAAGGGCTGATGGCAAAGCGGCAAACATTGCTGAAGAA
GmaAffx.92834.1.S1_x_at	CF808559	At5g28050	6e-81	Metabolism			TAGCTTCTGCGTTTGCTGGACATAAGGAAGCTATACAGCAAAGGGACCACAAATTTTTAAGAATTGCTGTTGAAGAAGCCTATAAAGGGGTAGACTGTGAAGATGGGGGTCCCTTTGGTGCTATTATAGTATGTAATGATGAAATAGTTGCTCGATGTCACAACATGGTTCTGAGGAACACAGACCCTACTGCTCATGCAGAAGTCACTGTTATAAGAAAGGCTTGTGAAAAGTTAAACCAGATAGAACTTTCAGACTGTGAAATATATGCTTCTTGTGAACCTTGCCCTATGTGCTTTGGAGCAATTCACCTCTCACGAGTTAAGAGGTTGGTTTATGGAGCAAAGGCAGAGGCAGCAATTGCTATTGGATTCGATGACTTCATTTCAGATGCATTGC…
GmaAffx.91944.1.S1_s_at	CF808330	At1g59950	9e-91	Metabolism			GAAGCTTCAGAATCTGCTCTCTGTTGCTACCATCCGTCCCGTGGTCGATCAAGTGGAGATGAACCTTGCATGGCAACAGAAGAAGCTAAGAGAGTTCTGCANAGAAAATGGGATAATACTGACTGCGTTCTCTCCACTGAGGAAAGGTGCGAGCAAGGGCCCAAATGAAGTGATGGAGAATGATGTGCTGAAAGAGATTGCAGAGGCTCATGGGAAATCCATAGCCCAGGTGAGTCTGAGATGGTTGTACGAACAAGGTGTGACATTTGTGCCAAAGAGCTACGATAAGGAGAGGATGAACCAGAATCTGCA
GmaAffx.92143.1.S1_s_at	CF806865	At5g22140	3e-17	Metabolism			GGGAGAGAGAAAATTTCAAGCACAAAAAATGGCGGAGAAGAAAGTGGTGATCCTAGGAGGTGGTGTTGCCGGTGCCAACCTTGCAAAAACTATACAACGTCAAGCCAACGTCACCCTTATTGATCCGAAGGAATATTTTGAGATTCCATGGGCAAGTTTGAG
GmaAffx.92176.1.S1_s_at	CF807901	At5g16990	1e-97	Metabolism			GAAGGCCCTCCCAATAGTCGTGCTTACACTCCTGGCTCTCCATTAATAGGATATGGTGTGTCTAAAGTCCTGGAATCTGGGCACCCAGATTATAAGGAAGGTGATTTAGTGTGGGGCTTTACCAAATGGGAAGAGTATAGCTTGTTACCCTCAGCTCAAATACTCTTCAAAATTGAGCACACTGATGTTCCACTTACCTACTACACTGGAATTCTTGGTATGCCAGGAGTGACTGCATATGCAGGTCTATTTGAAGTAGGATCTCTTCANAAAGGAGAAAATGTTTTTGTTTCGGCTGCCTCTGGCGCAGTTGGTCAACTTGTTGGGCAATTTGCTAAACTGAATGGTTGTTATGTAGTTGGAAGTGCTGGATCTAAAGAGAAGGTGGATCTGCTGACA…
GmaAffx.92117.1.S1_s_at	CF807842	At5g37600	5e-89	Metabolism			GCAGAGTACATATGGATCGGTGGATCAGGAATGGACCTGAGGAGCAAAGCAAGGACTCTCCCAGGACCAGTTAGCGACCCTTCAGAGCTTCCCAAGTGGAACTATGATGGTTCCAGCACAGGTCAAGCTCCTGGTGAAGACAGTGAAGTGATTTTATACCCACAAGCCATTTTCAGGGATCCATTCAGAAGGGGTAACAATATCTTGGTTATCTGTGATGCCTACACTCCTGCTGGAGAACCTATTCCCACTAACAAGAGGCACGCTGCTGCCAAGGTTTTCAGCCATCCTGATGTTGTTGCTGAAGTGCCATGGTACGGTATTGAACAAGAATACACCTTGTTGCAGAAAGATATCCAATGGCCTCTTGGGTGGCCTGTTGGTGGTTTCCCTGGACCT…
GmaAffx.93571.1.S1_at	CF809296	At3g61040	6e-18	Metabolism	Cytochrome P450		TGACTGCCACGTCACGCCCTCTACCATGGACATGAGG
GmaAffx.9360.1.S1_s_at	BI787001	At1g02500	3e-11	Metabolism			TCATCTCCACACAGCATGATGAGACTGTCACAAATGATGAGA
GmaAffx.93157.1.S1_s_at	CF808882	At2g37790	2e-48	Metabolism			GATATTCTCCACTAGGTTCACCAGCAGCTCTCAAAAGTGATATTCTTAAGAATCCTGTTGTCACAGAGATTGCAGAGAGATTGGGGAAGACACCAGCACAAGTTGCCCTTCGATGGGGCTTGCAAGCAGGTCATAGTGTGCTTCCTAAGAGCACTAATGAGTCCAGAATCAAGGGAAATTTTGATATCTTTGACTGGTCTATTCCTCAAGATTTGATGACCAAGATCTCTGAAATTAAGCAGGAAAGGCTAGTTAAGGCCAGTTTTTTTGTTCACGAGACCTATGGTGCCTATAGGAGCATTGAAGACTTCTGGGATGGTGAACTCTGAGCAATATGCATCTTTGAGACGTTGAAAAATACATTGCTCCTAGAGC
GmaAffx.93553.1.S1_s_at	CF809278	At1g55020	3e-42	Metabolism			GAAAAACTAGAAAAGATCCCAACAGTGAGAAGCCGAGCGATTTTGTTTACCTTCCAAGAGATGAAGCATTTGGTCACTTGAAGTCATCAGATTTTCTCGCTTATGGAATCAAATCTGTATCCCAAGATGTCTTGCCTGTCTTGACTGATGCATTCGATGGAAATATTTTGAGCCTTGAGTTTGATAATTTTGCTGAAGTGCACAAACTCTATGAAGGTGGAGTTACACTACCTACAAACTTTCTTAGCAAGATCGCCCCTATACCAGTGATCAAGGAAATTTTTCGAACTGATGGCGAACAGTTCCTCAAGTATCCACCACCTAAAGTGATGCAGGT
GmaAffx.93074.1.S1_at	CF808799	At3g02360	1e-115	Metabolism			GCTTGATACAAAATTGTCCCAGCTCATGGTGCCTTTTTAATTTTCACATTT
GmaAffx.92851.1.S1_s_at	CF808576	At1g59950	7e-91	Metabolism			ATCCCTCCCGCAGTGAATCAAGTAGAAGTTAACCTTGGGTGGCAACAACAGAAGCTTAGAGATTTCTGCAAGGAAAAGGGTATTACTGTAACTGCCTTCTCACCCCTGAGGAAGGGTGCTAGTAGGGGTGCTAATTTTGTGCTGGACAATGATGTAATCAAAGAATTGGCAGATGCTCATGGCAAGACTGCAGCCCAGATTTGTCTTCGATGGCTATATGAACAAGGGTTGACTTTTGTGGTTAAGAGCTATGACAAAGAGAGGATGAAGCAAAACTTGGGGATTTTTGATTGGTCACTGACTGAGGATGATTACAAGAAAATAAGTGAAATCCACCAAGAGAGGCTCATCAAAGGACCAACCAAGCCTCTTCTTGATGATCTATGGGATGAAGAATGA…
GmaAffx.92897.1.S1_s_at	CF808622	At3g23490	8e-58	Metabolism			TCACCAACGTCTATGTTGCTCAGCTTCTCAGGAGACAGGCTCAGCTCAATCCCCAAACTGCCCCTCTACTTCGGGCAGCGCTGCCCGACCTGCCCCAAGACCTTGTTTCTGAGATGATGAGACCCCCTTTGAGGTCTTATGACCCTAATCTCATCCAAGACCCCACTGTCTATAGGTTGAATGAAGCTGTTATGCATTTTGGGGAGAGCATCAAAGAAATAATCAATGAGGAGTTTGGTGATGGGATCATGTCAGCAATAGATTTCTACTGCTCGGTTGATAAAATTAAAGGAGTAGATGGGAAGGATCGTGTGGTATTGACATTTGATGGGAAATATTTGCCACATTCAGAACAGAAATCTGAGCACATGGTTTCAAGAACAAGGCCACTGGGAAAAC…
GmaAffx.87417.1.S1_at	BM568072	At3g57520	3e-66	Metabolism			AAAAGTCTATCACAGGGAGGTACACCTCCACGATTCCTCATCATAGATGATGGTTGGCAACAGATTGAAAATAAAGCAAAGGATGCTACTGAATGTTTGGTACAAGAAGGAGCACAGTTTGCTACTAGGTTGACTGGTATTAAAGAGAATACTAAATTTCAAAAGAAATTACAGAACAATGAGCAGATGTCAGGTCTGAAGCATCTAGTACATGGAGCAAAGCAGCATCACAATGTGAAAAATGTATATGTATGGCATGCACTAGCTGGTTATTGGGGTGGAGTGAAGCCAGCAGCAACCGGCATGGAACATTATGACACTGCCTTGGCATATCCAGTGCAGTCACCAGGCGTGCTA
GmaAffx.86175.1.S1_at	AW349132	At5g19440	1e-41	Metabolism			CAATGGTTCACCAACGTTTTCAAATAATAGTTTTGGGTGGATCAATGTGAAAGATGTTGCAAACGCGCATATTCAAGCATATGAGATTGATTCAGCTAGTGGAAGATATTGTCTGGTTGAAAGAGTGATACACTTCTCCGAACTTGCAAAAATTTTACGTGATATGTACCCAACTTTACAGATTCCAGACAAGTGTGAAGACGATGAGCCTTTTATGCCAACATTTCAGGTTTCCAAAGAAAAGGCAAAGAGCTTGGGAGTTGAATTTATTCCCTTGGAAGTGAGCCTCAGGGAGACAGTTGAAAGTTTAAAAGAAAAGAAGTTTGTGGACTTCTAGTTCGTGATATCTCCTAGAAGAATAAATATTGATAACACTAACTTTGTCTAGTCAGTGATTTT…
GmaAffx.88740.1.S1_s_at	CK605984	At1g69230	4e-28	Metabolism			GTGGTGGTCAGAGTTCCTTAGGTTATCTCTTTGGCAGTGGGGTGCCTGCCAGCAGTGCAAACAGTCAGCCTGCAAATGGTGCTCGCACTCAAAATGCTAGTGCTCCTTCACCACCAGTCGATAAGCAAAGTCCAGCACCAGCACCAGCACCGGCACCTGCATCATCACCAATTGATAAGCAAATTCCAGCTGGAATTCCTGGAAGTCTTAAAAACAATTACCATCGTGCTGATGGGCAAAACTGTGGCAACTTTCTTACTGATCGGCCATCTACCAAGGTTCATGCTGCCCCAGGTGGCGGATCTTCCTTGAATTACCTCTTTGGTGGTCCTCCAGGGAACTAATTCATCATTGTGATTCAAACCTACCATGTGATGTATCATGTGTAAAATAGATAGC…
GmaAffx.89241.1.S1_s_at	CK605667	At3g17390	6e-71	Metabolism			AGTGGTGCTTACATTGTGAGACAGGCTGCTAAGAGCATTGTGGCAAGTG
GmaAffx.89259.1.S1_s_at	CK605646	At1g55020	1e-28	Metabolism			AAGTGTGGAGTACTGTTGATAGCAAAGATGTTTGGGATCTTCGACAAGGGGCAAAAGATAAAGGGGACAGTGGTNTTGATGCCAAAGANTGTGTTGGANTTNNAANGCCNTAACCTCNATCGGTAAAGGTGGTGTTATTGACACAGCCACCGGCATCTTAGGCCAAGGCGTCANGCTTAGTTGGTGGAGTAATTGATNNTGCCACTTCCTTCTTAGGCNGTAATATCTCCATGCAATTGATCAGTGCTACTCAGACTGATGGCAGTGGAAATGGGAAAGTTGGAAAAGAAGTCTATTTGGAAAAACATCTTCCGACCTTGCCAACGTTGGGAGCAAGGCAGGATGCGTTCAGTATTTTCTTTGAATGGGATGCTAGTTTTGGAATTCCAGGAGCATTTT…
GmaAffx.89562.1.A1_at	CK606162	At3g23810	4e-37	Metabolism			GTCGATTGATGAACTGGGATGCGCCACTGGACACCCCAGTTTTGTGATGTCCTGCTCCTTCACCAACCAGGTCATTGCTCAGCTTGAGTTGTGGAAGGAGAAGAGTACCGGCAAGTACGAGNNGNNGGTTTNCGTTTTGCCCAAGCACCTTGATGAGAAGGTGGCTGCACTTCACCTGGGCAAACTTGGAGCTAAGCTGACCCAGCTTAGCAAGTCCCAGGCTGATTACA
GmaAffx.89628.1.S1_s_at	CK606096	At3g55440	1e-105	Metabolism			CCAGTTTGGGCCATTGGAACAGGAAAGGTTGCAACTCCTGCTCAGGCTCAAGAGGTTCATGCTGATTTAAGGAAATGGGTTCATGACAATGTGAGTGCTGAAGTTGCTGCATCTGTAAGAATTATCTATGGAGGCTCTGTAAATGGAGGAAACTGCAAAGAATTGGCAGCACAGCCCGATGTTGATGGATTTTTGG
GmaAffx.89435.1.A1_s_at	CK606245	At3g17390	2e-78	Metabolism			GCAAATGGCCTTGCTAGAAGGTGCATTGTGCAAGTTTCCTATGCCATTGGTGTCCCTGAGCCCTTGTCAGTGTTTGTGGACACTTATGGAACTGGGAAGATTCCTGACAAGGAGATTCTGCAAATTGTGAAGGAGAATTTCGACTTCAGACCTGGAATGATCACCATTAACTTGGACCTTAAGAGGGGTGGTCATAGGTTCCTCAAGACAGCTGCCTATGGACACTTTGGAAGGGATGATGCAGACTTCACCTGGGAAGTTGTGAAGCCACTCAAGTCAGAGAAGCCTCAAGCTTAAGAGTGTTGTTAAGTTAATCACTCCCTTCAGTGGATGTCTTGCTGGGTGTGGATGAATAATTTGCGTGTTTCATGACTACTACTACTACTACTCCATTCAATG…
GmaAffx.90369.1.S1_at	CF807463	At5g17380	0	Metabolism			AATGCAAATTGTACTCCTATGGCTTTTTATGCTTGAATTA
GmaAffx.90369.1.S1_s_at	CF807463	At5g17380	0	Metabolism			TTAGTGCTATGGAAGTTGAGACGTTGGTNCGGTACCAGCTGCCTGTGGTCGTGATTGTTTTCAACAATGGTGGNGTATATGGTGGTGACCGTAGACNCCCAGAGGAGATAGATGGACCTCACAAAGATGATCCTGCCCCCACAGATTTTGTCCCAAATGCAGGNTACCATGCTTTGATAGAAGCTTTTGGTGGAAAGGGCTATCTTGTTGGGACGCCTGATGAACTAAAGTCTGCTCTTTCAGAATCCTTCTCTGCTCGGAAACCAGCCGTAGTAAATGTTGTGATTGATCCCTATGCTGGTTCAGAGAGTGGGAGGATGCAACAT
GmaAffx.90263.1.S1_s_at	CF805988	At1g55020	1e-80	Metabolism			GGAATTTGCTAGAGAGGTGATTGCCGGTGTAAACCCAAATGTGATCCGTCGTCTTCAAGAATTCCCACCAAAGAGCACACTTGATCCCACTCTCTATGGTGATCAAACCAGTACCATAACAAAAGAACAATTGGAGATTAACATGGGAGGGGTCACAGTAGAAGAGGCACTTAGTACTCAGAGATTATTCATATTAGATTACCAAGATGCATTCATCCCATATTTGACGAGGA
GmaAffx.90414.1.S1_at	CF806139	At2g23910	1e-14	Metabolism			CGTGACCGTTGATTTAGCTTTCTTGGTGGACGCCCACATCTGTGTCTACGAGGATGACACATACTACTGTCGTTNTTNGNGCTTCAATCACATCATAAACACCCATGAGGACGCTGTTCAGCTCGCCCGCAAGTTGACGCCTGGCGCATCTTCCTCCTTGCCGCANAGTGATGACTATGGGAAGAGTTTTATCGAACAGAGAATTAGCAACACGAAGTTGAACACATTGCTGGTGGACTTCGAGGCATAATCGACTCCCATGGTCATCCTTTTGGACGGTGATTAGAGCAATCACCTTGGCTGTCTTTCTGCGGGAAAGT
GmaAffx.90332.1.S1_at	CF806057	At5g25880	3e-20	Metabolism			GAATCTTCAACATTATTCTCATGTAATTTACAGCGGAAGCCTTGGCTAAACTGGTGACCGAGGAGAACTACGAAAAGGGCTTGATTTATCCACCATTCTCTAACATCAGAAAAATTTCAGCTAACATAGCTGCAAGTGTAGCTGCCAAGGCATATGAGCTAGGCTTGGCTACACGTCTCCCTCGTCCTCAGAATCTTGTGAAGTATGCTGAGAGCTGCATGTATACCCCTGTCTACCGAAACTATAGGTGAATTATGGGGCAAGTCACTTAACTTTGGCTGTAATAAACATATGTTTTGGTGGCATATGTGAGTTGTTTTATGTAACTTACGCATAAGTGAGAGTGGTCTTATGCTTTTTATTACGAAATCACCAAAACTGCAGGTGAATCATGCTTTT…
GmaAffx.90206.1.S1_s_at	CF805853	At1g28480	1e-29	Metabolism			CATCCCCATAGGAGCACGTGGCATGCCACACGCAGGAGGAATCAAAGAATCCAATGGCACCTATCCATCCAAAGCTGCCACAATGGTATCGGAGAACGCGGTGGTAATCATTGGAAAACGGGGATGCTGCATGTGCCACGTGGTAAAAAGGTTGTTACAAGGTCTGGGAGTGAACCCTCCCGTGTACGAGGTGGACGAGGACCACGAAGCCGCCGTTGCTCTCCACCTGTCCCCGCAGGGCGCCGAAACGGTGCAGTTTCCGGCGGTGTTCCTGGCCGGCAAGTTGTTCGGAGGGTTGGAAAGAGTTATGGCCACTCATATCTCAGGTGAATTGGTTCCCATCTTGAAGGATGCTGGTGCCTTGTGGCTCTGACTCTTACTCTAGCTACCTCCATCTTT…
GmaAffx.90376.1.A1_at	CF806101	At1g55740	4e-52	Metabolism			ATGCAGCCTTTGCATCGTTCCCATACAGTATGAATTGGTTGCTCTTGGTTTCATTATGCCTCATTTTTAAGAAGTTCATTGTAGTTTCGTTAAGCTAGAAAAGAAATATACGGATAGAAATGCATTAAGATTAGCCCGCATATCCTTTAAATGGA
GmaAffx.90450.1.S1_at	CF805871	At4g24380	4e-56	Metabolism			GAAGCAAATTTAGAGATCCCAGCATATGCGATGTTGCCTACAAAGACCCCATCAAAGCTAAATCTGTTCACTTCATTGGGGAAAAAGATTGGCTGAAACTGCCTTCAGAGGATCTAGCGTCTGCATTTGACAAACCCTTCATAATAAGGCATCCCCAAGGTCACACCGTCCCACGATTAGATGAAGTGGCTATCAGTCAATTGAGAAAATGGATTACAGAAGAAGTCCTTTGTCAACCAAAAGTTGAGGTCTCAGTTTGTGAGCGTGAAACAGACCATGAAGAAAAGATGTCAGAGAAGACGACCAAGATAGAACCATGCGGTACCAATCA
GmaAffx.90459.1.A1_s_at	CF806184	At3g08590	4e-58	Metabolism			AAGGCTAGGGATGCTATTCTTAGCGGGAAATTTGATCAGGNNCGCGTCAACCTTCCAAATGGTGACATGGTGGGGCATACAGGTGACATTGAAGCAACAGTTGTGGCNTGCAAGGCAGCTGATGCTGCTGTGNNNNTGATTCTTGATGCAATAGAGCAAGTGGGTGGAATTTATNTTNTCNCNGCTGACCANGGGAATGCNGAGGATATGGTCAAGAGGGATAAATCTGGAAAACCACTTCTAGGCNNGGATGGAAAAATCCAGATTCTTACTTCCCATACTCTTGAGCCTGTGCCAATTGCTATTGGNGGTCCNGGATTGGCCCCTGGTGTNAGATTCCGNAANNATGTTCCAACNGGNGGNCTTGCCAACGTTGCTGCAACTGTGATGAATCTTCAT…
GmaAffx.90600.1.S1_at	CF806325	At3g57520	1e-101	Metabolism			AGCAGATTATCATGCTGCAGCTCGTGCAATTGGTGGATGTCCTATTTATGTTAG
GmaAffx.90600.1.S1_s_at	CF806325	At3g57520	1e-101	Metabolism			GACAAGCCAGGCAATCACAATTTTGATCTTCTTAAGAAGCTGGTTCTCCCGGATGGTTCGGTTCTCCGTGCTCAGTTACCTGGCAGGCCAACTCGTGATTCTCTATTTGTGGATCCAGCCAGAGATAGGACTAGCTTGCTCAAAATATGGAACCTGAACAAATGCTCTGGAGTTGTTGGTGTATTTAACTGCCAAGGTGCTGGATGGTGCAAGATAGAGAAGAAAACCCGCATCCATGATACATCTCCTGGTACACTCACCGCCTCTGTCTGCGCCTCTGATGTTGACCTCATCACACAAGTAGCAGGTGCTGAATGGCTTGGAGATACAATTGTTTATGCTTACAGATCAGGTGAGGTGATTCGGCTACCAAAAGGGGTTTCAATTCCAGTGACACTA…
GmaAffx.89783.1.S1_s_at	CK606640	At1g76490	6e-20	Metabolism			AAATTCTAGGCTACTGGCCACCATTGTAGCCGGTTCAGTCCTTGCCGGGGAGCTATCGCTCATGTCTGCTATTGCAGCTGGACAACTTGTTAAGAGCCACATGAAATACAACAGATCTAGCAGGGATATATCTACAATTGTCCAATGAACTGGCCACAGTACACTTAAACTTGTGTTAGAGACTAATATTCTAATAAGCAAACCATCAGATAAAGACAAAAATAACGAGAAAAAAAAATTGGTATTGATGATGGTGGGGGTAAAAGATAAAGTGATGGTTGGCATCTTCCATGGGCAAATCCAGCTCCCCAGAAGCGTGGGGTTGGTTGGCACTCATTGAATGTCTGCTTCGTGTGAGGCCTTTTCTCTTATGGAGA
GmaAffx.90006.1.A1_at	CF805731	At3g12120	7e-38	Metabolism			ATTAATGTAGCCGAGGCTTCTTTGAACTTTCCCTTGTGACTGTTTAGTATCATGGTTGCTTATTGGGAATAATTTTGTTGAACCCTGATGTTGGTAGTAAGTATCTAGACAGTTGCATAGCGGTTTTGTTTACAGAATAAGATATAGCCTCTCTGAACAGTTTGATTATTGCACCATGGTTTGCAATCGGTGCATGTCGACCAAGTTTCTCAAGACTGTGGAGAA
GmaAffx.89726.1.A1_s_at	CK605851	At1g55020	0.007	Metabolism			AAGGCAATCAATCAATCTTCTGAGAGTGTTTGGTTGAAAGTAGCAAAGATGTTTCCTTTCGGGCAAAAGGGTCAAAAGATAAAGGGGACTATGGTGGTTATGCAGAAGAATGTGTTGGATATCAACAGCATCACCAGTGTTGGAGGGATCGTTGACCAAGGCTTAGGCTTCATAGGCAGTGCAGTCGATGCACTTACTTTTGCAGCCACCAAAATCTCCATCCAGTTGA
GmaAffx.90163.1.S1_s_at	CF805888	At5g18670	6e-21	Metabolism			TTCTTCTGAGTCTGGTGTTCCAGGTGGTTTTGAACAAATAAAGAAGAATCTATCTGGAGATATATGTATTGGATTTGTTCACATATCATAGAATGGGAGCATCTTTCTTTTCTCCAGAGCATTTTCCTTTGTTCACCGAGTTTGTCCGGAGCCTTAAGCAACCTGAACTGCATTCAGATGATCTACCGGCCAAGGAGGAAGAAGGCGCCGAATCTGCCATGGATATGAGCCATGAATCAAGTGTGAGCATGCAAGCAGCCTAATGGTTGTAAATTCGTAATGTATGATAATCATGTAGATAACAATTAGTTATACCCTTGGATCAGTGCATGGGATGAGATTGAGAACAGGTTATTTTGTAAGCACAATATGAGAATCTTTTTTGCCGGTTTATCCTCA…
GmaAffx.90026.1.S1_s_at	CF805751	At5g60600	2e-81	Metabolism			TCTCCATGACCTTCCTTATACAGAAGACAGAATTAGCAGAGTGCATGCAGCCAGACGGTTATTTGAGTACCTATCTGACAATTCTCTAAACTTCCCTGTTATTCACCATATTCAGTTCCCAAATGGGATTCACAGGGATGACTTGGTAATTGGTGCTGGTTCTGATGCTGGAGCCCTTCTGGTTGATGGGCTTGGAGATGGACTACTTTTGGAAGCCCCGGACAAGGATTTTGAATTTATTAGAAACACTTCTTTCAATTTGTTGCAAGGCTGCAGAATGAGAAATACAAAGACAGAGTATGTCTCATGTCCATCCTGTGGCAGAACATTGTTTGATCTTCAAGAAGTAAGTGCACAAATTCGGGAGAAGACATCACACCTC
GmaAffx.81366.1.S1_at	BU550660	At3g63010	1e-116	Metabolism			TAAAGCTTGACATTTTACTTGGGTTNTCTTTTTTTTTNCNNNNNNNCCCNCACTTTTGTATCNNNNNNNTTNTCTTTTNCTNNNTTGTAGTAAGGTGTGTAGTTATAAGATTGTGTAGCATTACTTGTTATTGTCATAACATCTATGGTGGNCAATTTGAGAGTTCTGTGACCTGNGGACTACTGCTTCNTGTTCNTCTCTGTTTGTGTCTNTTGGAAGGTAGCNCCTANCACCNGCTTNGGCAGTACCAGAACTCGGTTCATTTGGGGGGTTTGGTCGAACCACCGTATACAACGCTTCAGCCCCCCTTTTAACGTTTTGAGGTCAATGGCAGGAGGGGAGATAGAAGATGAGGATTGGTTCATCACTTTGTTTGATTAAGTGAATGGTTTCCTCTTG…
GmaAffx.83780.1.S1_at	BM886753	At4g21580	1e-132	Metabolism			CCTTGTTGGTTCATGGAGGTTCCAGTGGGATTGGTACATTTGCAATTCANATAGCCAAGTATCGAGGGTCACGAGTGTTTGTTACTGCAGGAAGTGAGGAGAAGCTAGCTTTTTGCAAGAGTATCGGAGCTGATGTGGGCATCAATTATAAAACAGAAGACTTTGTTGCGCGGGTNAAGGAAGAAACTGGTGGCCAAGGTGTTGATGTTATTCTTGATTGTATGGGAGCATCCTACTATCAAAGAAATCTTGATAGCTTGAATTTTGATGGAAGGCTTTTTATTATTGGCTTTCAAGGTGGGGTTAGTACACAAGCAGATCTACGCCCTTTACTTGCTAAGCGTCTCACAGTACAAGGAGCTGGCTTACGCAATAGAAGTCTGGAAAATAAAGCTGTGA…
GmaAffx.77005.1.S1_at	AW509412	At3g58610	1e-89	Metabolism	Amino Acid Biosynthesis/Metabolism		CTCGATTTCGACACGAAGGTTTTCAAGAAGGAGAAGATTAACCTCGCNGGACACGANGAGTACATCGTAAAAGGAGGCAGGGATTTGTTTCACTTGTTGCCCGATGCTTTCAAGGGNATCAAGCAGATTGGTGTTATCGGTTGGGGATCTCAGGGACCTGCNCAGGCTCAGAATCTACGGGACTCNCTTGCTGAAGCAAAGTCTGATATTGTGGNCAAGATTGGACTCAGGAANGGTTCTCGTTCCTTTGCNGAAGCTCGNGCAGCTGGGTTTTCTGAGGAGAATGGGACTCTANGTGACATATGGGAAACTGTCTCGGGCAGTGATCTTGTGATGCTGTTAATTTCTGATTCCGCGCAGGCTGATAACTATGAGAAGATATTGTCTCACATGAAGCCA…
GmaAffx.77177.1.S1_at	BE023016	At3g14690	1e-59	Metabolism	Cytochrome P450	CYP72A	CCTTTTGTCCAAAACGTGTCAAGCGACGTTCTTGCTCGTGCAGGCTTTGGAAGTAGCTATCAAGAAGGGAAAAAAATATTCGAACTTCAAAGGGAAATGATTCAGCTTACAATGACGCTCTTTAAGTTTGCTTTCATTCCAGGTTACAGGTTTCTGCCAACGCATACCAACAGGAGGATGAAAGCAATTGACAAAGAAATACGAGAATCACTTATGGTAATCATCAACCGAAGATTAAAAGCAATCAAAGCAGGGGAGCCTACTAACAATGACTTGTTAGGCATACTCTTGGAAT
GmaAffx.77799.1.A1_at	BI967949	At4g34240	0.003	Metabolism			GCTCAATTTGTTTTGAAATCTAGCAGTTGTTGATGCATCTTTCGTTCTTTTTTTTTTTTGTACTTTATCATGCTGTGTAGCTTTATTATTATTTTGTGTTTTAGAAGAAAACAAATAAGCGAGAGTATTGTGCATGAAAAAAGCAAAATGATCAATGCTACTTTTCTTCGTGATCGTGTTAGATGTCTTGTGGTTGTAAATTGTA
GmaAffx.64615.1.S1_at	BI424359	At3g13110	5e-53	Metabolism			GGGAGACTGCAGTTATTGGGAATAATGTGTCAATTTTGCATAATGTGACATTGGGAGGGACTGGTAAGGCAAGTGGGGATAGACACCCTAAGATTGGTGATGGGGTGTTGATAGGTGCAGGGACTTGTATTTTGGGGAACATTAAGATTGGTGATGGAGCTAAGATTGGTGCTTGTTCTGTTGTGTTGAAGGAAGTGCCACCAAGGACTACTGCTGTTGGGAACCCTGCTAGGTTGGTTGGAGGGAAGGATAACCCTATTAAATTGGATAAGATGCCTAGTTTTACCATGGACCATACTTCATGGTCTGATTATGTTATATAGAAGCTAATTAATTGTCTAACATGTTTTAGAGTTTGTGTTTAGGTGGGAATTGTTTTGGTTGAGGGGGCTTGGTTGT…
GmaAffx.64037.1.S1_at	BI321162	At2g25160	2e-39	Metabolism	Cytochrome P450	CYP82F	CTGGAAGGAGAGTATGCCCCGGTTCCTCACTGGCTCTGCGTGTCGTGCACATGGTCTTGGCTAGACTCTTACACTCTTTCAATGTTGCTTCTCCTTCAAATCAAGCTGTGGACATGACAGAGAGCATTGGACTCACAAATTTAAAAGCTACTCCACTTGAAGTTCTCCTAACTCCACGTTTAGATACAAAGCTTTATGAGAACTAAAATTATATATTATGCTAGTTTTTTTCCTCAAAATTAGGGGAAGCCTCAAATCGGGGCCTTCCATCATGTAATAAATGTTCAACGGGGTTGCGCTGCTGTTACACTCATAGTTATCACATTTAAATCAGTCATCGACTTGATCAAAGTATTGAGTCATTGGGTTAGGAGGGGACCCAATGAGTCGTTAGTTGAC…
GmaAffx.66796.1.S1_at	CA818986	At2g21250	2e-47	Metabolism			GGTCATTCCTAAATCGTCAAAACTGGAGAGGTTGAAAGAGAACTTTCAGGTTTTCGATTTTGAGTTGTCTAAAGAGGACATGGAGCTCATTGGAAGTATAGATAGAAAATATCGAACCAATCAACCAGCTGTGTTTTGGGGCATAGATTTGTATGCGTGAGAATGCCCTTCCTAAGTCTGTATCATGGCTGTTTGACCTTGTGTTAAGATTCAGATTTGGTATAAGCTGATCTTTCAGGCTCCTTAGTAGCTCAGTTTATTTGATAATGTAAACTTTCTTTGTTGATGGTTGAAAAATCATCTTCTCATCCCATATCCAATCTCGTGGACTAAATAAGAGAGACTTCTGAATGTTGTTGCTTAA
GmaAffx.5285.1.S1_at	BM523736	At5g07870	5e-26	Metabolism			TAATGAGCGCTCTGGAATCTGATGAGGAGTTTATGAATGTTGTCTCGGTTTCCAATCCCTTATGCTAGTTTGCTATTGTTCCCACT
GmaAffx.60245.1.S1_at	AW317569	At1g17420	1e-106	Metabolism			GAGGGTGATCCAGAATATGCAAGTTTCNNTGCTGACCCTCAGAAGTATTTNCTGAATGCATTGCCNAGCTTGCTNCANGCCACAAAGTTCATGGCTGTGGTTGACACACTCTCNACTCACTCACCTGATGAGGAGTACTTGGGNGAGAGGCAACANCCTTCNATTTGGTCTGGNGACGCNGAGATNGTNGAGGCGTTCTACGATTTCTCCGCCAAGGTTCNACAGATAGAGAAGGTCATTGATAGCAGGAACCTTGATCGGACTCTAAGGAACCGTTGTGGTGCAGGGGTGTTGCCATATGAGTTGCTTGCTCCTAGCTCTGAACCTGGCGTTACATGCAGAGGGGTGCCCAATAGTGTGTCCACATAACTATACTAAACTAATAAATAAGGGAGTCAC…
GmaAffx.49521.1.S1_at	AW348568	At5g65780	5e-54	Metabolism			TATTTGGAGGAGGTTTCTTCATGCAACNTTTTNGTTGTTAAGGGTAACGTTATTTCAANCTCCAGCTATTAAAGGGACAATCCTACCTGGCATTACTCGCAAAAGTATAATTGATGTTGCTCGAAGCCAAGGGTTCCAGGTTGAGGAGCGATTAGTGTCAGTGGATGAATTGCTAGATGCTGACGAGGTCTTCTGCACGGGAACAGCTGTGGTTGTATCACCTGTTGGCAGTATTACTTATCTTGACAAGAGGGTAGCATATGGGGATGGTATTNGCGTGGTTGCACAGCAACTTTATACTGTCCTTACCAGATTACAGATGGGTCTTACGGAGGATGAGATGAATTGGACTGTTGAGCTGAGATAAGCGCNCCATGNATAGTTTGCAGTTCATGTTTT…
GmaAffx.50033.1.S1_at	BU550874	At3g57610	8e-60	Metabolism	Purine Base Biosynthesis		GTTTCTCATCGTTGAATCTTACCAAGCTNGATGTTTTATCAGATCTTGAAGAAATACAGTTNGGTGTCTNTTACAAACTTGCTGATGGCACCCCAATCAAATCATTCCCTTCAGATCTNCGTCTTCTTGAGCAACTGAAGGTGGAATATGAAGTACTTCCTGGATGGAAATNTGATATNTCTTCCATAAGAAACTATTCTGACCTTCCAAANGCTGCNAGGCTGTATGTGGAAAGGATAGAAGAACTTGTGGGGGTCCCTATTCACTACATTGGTATTGGGCCAGGACGTGATGCTCTCATATACAAATGAGTTCACATTGGATTTGCATGCCTCTGTAGGTAAGTTGAGGCTTTTTGCGGTAGAGGTGTCGATTCCCGCTAAGTTTCAGTTTTTTTGG…
GmaAffx.33518.1.S1_at	BU760871	At3g13750	9e-62	Metabolism			TACGAGCTATGATTACGATGCGCCCCTTGATGAATATGGATTGGCCAGACAGCCAAAGTGGGGTCATCTGAAGGATTTACATAGAGCAATAAAACTCTGTGAACCTGCTTTAGTATCTGGAGATTCTACTGTACAACGGCTTGGAAACTATGAAGAGTGGCATTTGGAAATCAGCATTACAACTTGCCTCCTTGGTCTATAAGCATTCTTCCTAACTGCAAGCACACTGTTTATAACACTGCAAGGGTTGGTTCTCAGAGCACAACAATGAAGATGACTCGTGTTCCTATTCATGGAGGACTATCTTGGAAAGCGTTTAATGAAGAAACAACCACTACTGATGATAGTTCGTTCACTGTGACTGGCTTGT
GmaAffx.37677.1.S1_at	BE022626	At1g49650	8e-09	Metabolism			TTGTCACCATTATCAATACCTATCACTGTATGTGGT
GmaAffx.37677.1.S1_s_at	BE022626	At1g49650	8e-09	Metabolism			TAAGTTGCTCGTTACTATCACTGGCAAAGACGAGTTCAGAGACAGAGATATTCTCTACCACCACACCGTTGAGCAAAGTGGCTGGCAAGGTGAACTTCAACTCTTTGATGCTGGCGATGAGGAGCATGCTTTCCAGCTCTTCAAGCCTGAGACNCANNNNGCNNNNNNCNNNATNNNNCNCNNGGCTTCTTTTCTGGTTTGATGGATGGCTTGTCATGAGAGATTCCAAACATAATAAATCGTGCGTGCCTTCACCTGTCTTGTCTACTACTCCAGTTTTA
GmaAffx.42255.1.S1_s_at	BQ612697	At1g12050	3e-30	Metabolism			GGCCGCAGACTCCTGTTCTAGATAACTGGTATCGCCTGCCTGTTGCCTACCATGGACGGGCATCTTCTGTTGTTATTTCCGGAACAGATATTGTCCGGCCAAGAGGTCAAGCTCATCCAGTTGGCAGCTCTACCCCCTACTTTGGCCCTTCATTAAAGCTAGACTTT
GmaAffx.43676.1.S1_at	AW234124	At5g50950	1e-19	Metabolism			GGACCGTCTGATTGACTAACTCGCAATGTTTTGTTCTAATAATTCCTTGTTTCATCATATCGGCTACATTTGAGGTAGTATTTTTTTAGCTACACCCGTTGATTGGTTTGAGAAATGGCAACCCAATGAACAATAATTTGGCTTCCTCAGTTGATATTCGCGAGGGAAGAGTTCTTCCAAATTTGTAACGAGA
GmaAffx.43920.1.A1_at	BU761199	At1g60140	4e-08	Metabolism	Trehalose Biosynthesis		TTCAGGGCCTTGCTGCTTCATCCAATCCAAAACCCAGGCNTCTTGCTCATTCTCAAGTCTNTTTTGAGAGCACAGTTTGAGTTATAGANAAGTTAAGACAGCANTTATTGGTCNTCTCCTGTGAATCNATGAAATTTTTGGTTATTAATCTTAACCTGACAAACAAATGGNGCGGATCTAATTCTTTTTTGGGCTCCTGANCCGGTTTGCGTGGCATCNATCTNGGNGGNNTTTTGTTAAATANTGCGGTTCATTGNTGCCTNACAATTCTTCTCTTGTACATGGTAACATCANTTGTTATATTTGCTGGTGCCACCGAGAGCTTTAGTTGTGCTTAGAACTGTTAGATCNTTATCATCGCTGTTTGCACTGAACAATGGGGNCACCAAAACCTGTATA…
GmaAffx.49284.1.A1_s_at	BE658665	At2g36790	6e-07	Metabolism			AGGTGGTTCTTCTTACGACAGTCTCACGGCTCTGATTCATCATTTCAAGACTCTTGTGCCTAATCATGTGAATGGGAATGGGAATATCGATCACTGAATGAATATTACATTGATTCGAGTTTCATGTTTTTGATTATTAGTTATTTATCAAGTGAATGCATGAATGCCATAATTTTAGGGAATCTTAATCCGGGTAACTGGCTAGCTACCCTAAATTT
GmaAffx.15940.1.S1_at	AI522941	At1g12240	6e-48	Metabolism			TCTCTTCCCTTGTTGCCTTTGGAGGGTACAGGGCCTCCAACGCGCCNCATGCNGACGTGNCATCGNCANCATCGAACGATGANCAACCTAGTCCNACATCGGTGCCTTCTCCGAAATGGTACCCGGTTTCNCGNGGTGTTTCTTCNGGGGTGTCNGAGAAGTCATCAAGCATGTTGTTTGCGGTTAAAGATGGAGCTTCGNANGCATTTCCNTGGGACAANAGCATGNTGTCNTGGCAGAGAACTGCTTTTCATTTCCAACCAGAGAAAAACTGGATGAACGATCCNAANGGTCCTATGTACTACAAGGGATGGTATCACTTNTTCTACCAATACAACCCGAACGGTGCAGTTTNGGGTGACATAGTTTGGGGACANGCAGTNTCAAGGGACATGATCC…
GmaAffx.15177.1.A1_at	BU548038	At2g36840	6e-75	Metabolism			TTAGGATGGAACTACTTCGTCCGCTCAGAATAACTGTTGTAAGCAGGGGTCCTGATACAGAGCTGCTGGTTGCAAACCCTGTGGAGTTGTCGGGCAAAGGACGACCTCTTGTTTTTTATGATATTACTCTTGCTCTCAAAATGCTTGGCCCTTGCATATTTTCGGCTGAAGTTGGAAGACATGTGGTTGGAGACCGCGAGTGGGAAGTTTATAGAATCTTGCTTGATGAAGGGGAGGGTTTATCCATTCCAAGGAATAAGATTGAGAAAGGAGTTTGGAAGATGTTGATGGGTTGGGAGTGATCCATGGCTGGTGGCATTGTTCATCTTGGATGAACCTGTGCCCGTGTACAGATAACATGGTTATAATGTAGTTATGATATGTAACTTGTAATTATGA…
GmaAffx.1301.92.S1_s_at	BM527505		2.1e-47	Metabolism			GTCAACATCCGCAGGGACCATCGCAATGCTTTGTTTTAATTAAACAGTCGGATTCCCCTTGTCCGTACCAGTTCTGAGTTGACTGTTCGAC
GmaAffx.11224.1.A1_at	CD416193	At5g08415	2e-19	Metabolism			ATCTATTGGTTTTCGTTACGTAGCTAGTGGTCCACTGGTGAGATCTTCGTACAGGGCTGGGGAGCTGTTTGTCAAGACAATGGTACGGGAAAAGACCAAGAATGTTGCTGACTCGTTGTTATGATCTTTAGGTTCTGCGATTATGTATATTAGGCAACAACAACTGACGAGGTTTTGGCATGTTCATTGCTGAGGAGAAAATGTGTGCGGGCAGAAAATTCAATACTTTTGAAGTCAATCAGCTTTACGTATTCTTTGAACCAG
GmaAffx.10297.1.S1_at	BE475510	At3g13750	7e-42	Metabolism			GCACAGTGACAGTGTCTCCTGAAATTTTTGGAGGAGATCCTTGTCCAAGTGTCATGAAGAAACTCTCAGTGGAAGCCATTTGCACCTGATCATTTTCAATCTCCGAAAATAAGTGGAATAAAGTTTCCATATTGATTTATTCTGCAATTGAATACATGGTCTTTGGGTCAAAGTTTACACCTGTAGACCACCAGAGGCATTAATTTGGCTTTACCAAGGTGAAGTTGCAAATGAACACAACACACCATGTGGTTGAAAGCCTGCTGGGATGATTGTNGNGGNTTTNTGTGTATATATATTGGTGTTGTGNTTGTTATACTGANGTGGAGGAGAGGNTGAAAANGNTACCTGATGCACATTGAGACGACATCGATTGAGTCCATGTGCAAANTTGGTTTT…
GmaAffx.11858.1.A1_s_at	AW351023	At4g34920	4e-17	Metabolism	Phospholipid Biosynthesis		AGTCAGTGCTTCTCCAAAGGGTATGCAGATAGACTGCAGATTTTTTCTACGGATTTCATTGACCAGGATTTCGTTGATGCATGCGTTGGACTCACACGTGCCAGGGTTGAGGGTAGAGCCTGAAAATTGAAATTATCTCTCTTATGCTCGTAACTCTTCTTGTTCATGGTTCTGTCTCTTTT
GmaAffx.1301.127.A1_at	CD406089	At2g44160	3e-05	Metabolism			ACTTTAGCTATGTCACTTCTGTTGGTTGTCATGTTCTTTTCCTTTCTTTTGTTTTCTTCTCAGTATGATGATTCATATTACACATGGTTCTAAGTTGAAGTGCCAAATTATTTTTCTGGGCTATGTCCCTAACGTCTTTATATTTTCATTCTTCAAAGTCGCATGGGTAACCTGTACGTTGACATAAGGACAAGTTACTCCTTCCTCTGAATTGGATGTTTCTTAAT
GmaAffx.1301.39.S1_at	BI785728	At5g23250	1e-110	Metabolism			AAGGATAGTGGAACTGAGAAGCCTGTTGTTGCTTTTATTGCTGGTTTAACTGCTCCCCCTGGCCGTCGTATGGGTCATGCTGGAGCTATTGTGTCGGGTGGCAAGGGCACTGCACAAGACAAAATTAAAACCCTCAGGGAAGCTGGGGTCATGGTTGTGGAGTCCCCTGCCAAAATTGGAGCTGCCATGCTAGATGTTTTCAAGCAGAGGGGCTTGGTTCAATAGTTTGGGTTCATTTAATTTCATCAAGTCATTTTGGTTTCGATTATTTACAAACTGTTCAAAATTTCTTGATTCCCATTGGTAATGATGGGCTATTTTTTTTTTATTTTTTTTTTAAGTTACGAGAGGGGCATTAAAATAAAATTCAAGATGCTTTATATTTGCAGAAAGTTTGAT…
GmaAffx.32084.1.S1_at	BE823130	At5g57190	1e-138	Metabolism	Phospholipid Biosynthesis		GTGATTTTTCGTTTGGCACCACAGGATTATCACCGTTTCCATTTTCCAGTATCAGGAATTNTTGAGCAATCTGTAGATATCCCTGGATGCTTGTATACTGTGAATCCCATTGCTGTAAATAGTAAGTACTGTAATGTCTTCACGGAGAACAAGAGAGTTNTTTCAANANTTTCAACTGTAGATTTTGGAAAGGTGGCATTTGTTGCAATNGGAGCTACAATGGTTGGTAGCATTACTTTTACAAAGAAAAAGGGCGANTATGTTAAGAAGGGAGATGAGTTTGGATATTTCTCATTNGGTGGAAGCACNGTAATTTGCGTTTTTGAANAGAATTCAATTGCAATTGATGAAGACCTTTTAGCAAATAGCGCCAGATCANTGGAGACCTTGGTTTCTGTA…
GmaAffx.27805.1.A1_at	BI892863	At2g22250	1e-40	Metabolism			GGATTTCTTGGTTGAAAGCTTTAGAGAAATGGATGGTGTGAAAATATCTGAACCACAGGGAGCATTTTATCTATTCATTGATTTCAGCTCCTATTATGGAAGAGAAGTTGAAGGGTTCGGTATAATTGAGAATTCTGACTCCCTCTGTCGATACCTGCTGGACAAGGGCCTGGTTGCCTTGGTGCCGGGGAGTGCATTTGGAGATGATTCTTGCATCCGCATCTCTTATGCCGAATCCCTTACTAATTTAAAGACAGCCGTGGAGAGGATTAAGAAAGCACTTATCCCTCTAATTAGCTCTG
GmaAffx.24756.2.S1_at	BI316523	At5g02310	2e-89	Metabolism			TAAACTTGGGTCCTGTCGGAGAATCTACCTACTGGTCATGGCTGTACAGATTCTACTGATGCTGACATAGCTGCAAGCTTTCTTCTGCTCCATGCCTTTCCATAAAGTAGGTGCACATGTGTACATATATCATCATACTAGTGAGAGGAGCAATTGCTTCAAGGTATAGTTTGTGGAATTATGGGCTTATCAGTGGTTTAGGATGTCTGAAGACAATAATGTTGGTTCTGTATCCCTTCCTCTCCGTTTCTTTTTAGTTGGGCCATCCCCTCTACCCAGGTAGAGGAAGCAGGATAATTCCCTTGGGCATATTGTATACAAGGTATATATACATACTGATTTTTACTGTCAATATATGTTTGCTTTTTAGTATATTTCAGCAACAATGCTAATAGACTA…
GmaAffx.23763.1.S1_at	BU579160	At5g65110	0	Metabolism			GAATGACATTGGAACCTACCGAAATGTTGACTATGTGGCTCCCAACAAAGCCAAGGCAATCCACAAGCTCGCGGAGTATCTTAGTTTCCAAGTGAGGAATATTGCAAGGGAACTTGTTGATGCATTTGATCTTCCGGATCACGTTACACGGGCCCCCATTGCCAAGCGGTCAGGGGCCTACTCGCAGTACACACAATATGTGGGATTTTAAAAAAAGGAACGCAAAGAAGATTGATGTATTTGCGGGAATTAACATGAGAAAATATTTTCTTGGCTCATTGTTGAAATTTATATGCTAGTGGTTGCTCCTGACCAAGAAACTACTACACACGACCAGAACCATAAATGAATGAAATGAAGTTTCAGTCGAANANANNANNNNAAANNNAAAANNANNNN…
GmaAffx.18444.1.S1_at	BI469783	At4g11570	0.0001	Metabolism			CTTGCAGACATTGAAATGACTGAATTTGGGTCTGTGGAGCCTGAGATGGAGCTGGAGGTGGAAAAAGATTATGGCTCATCATCAGTTGATGACAATTTCTGGTAAATCCTATAATGTACAGTTGATTGAACCTCATCTGATTGTTGATGATATTAGTTACAGGTTAGTTACTTGTGTATATGGTAATCAGAATAAATGGGGTGATAAAATGATAAGTGGTATGCATTGAACATTGATGTTACTACTAATGCATTTTCT
GmaAffx.1968.1.S1_at	BE657555	At3g05020	1e-29	Metabolism	Fatty Acid Biosynthesis		AAACATGTACCAGATAAAAAATTATTTCTGCTAGACATGCATAGTTTTATATATTTTAGTATTGCGGGGTATAGTCTGAAGTGTTTTATAT
Gma.8520.1.S1_at	CA802722	At5g51260	5e-54	Metabolism			GCTTGCTGGATATCACACATGGGAAAAGTTAATTACCAAGAATACATCTGAATACCATGGTAAGACAGCAGTTACATACAAATCTACTGAGAGAAAGAAGCTGGAGGAAAAAGGATACAAAATCATTGGAAACATTGGAGACCAATGGAGCGATCTATTAGGAACCAACACAGGCGATAGGACCTTTAAGTTGCCTGATCCCATGTACTACATTAGTTGAGGTCTCTAGGGCTCTTACTAGCATGTTCCTATGAATAAAATAAGATGCATGTTGTAATAATGGAGAGATCGACTTAAACCAAGGAGCACTCGTTAATTAANTGCTATGTATGTNNNNGACTTTGTGTGAGACAAAAGGTCACGTGGTAAGAGACTGTACAAGCACAACGGTGTTTTATC…
Gma.9828.1.S1_at	AF529301.1	At2g32150	3e-83	Metabolism			CAGACTATGCAGTGGAGTGTGTGAATGACTTGGCACAAGTGATCCCAGAGATATGGGCAAACGAAATGGACGGTGAGGATCAAACGATGACACGTACCAAGAGTGAATTGGAGGCCGTACTCGCGTGTGCTGTGGTTGGAGCTTGAAAAGTGTTTGGATGTGGAGGAGGATAAGGCCTGACGTTGTACAATGTACATTCCCAAACCAACCCAACTATCTAAGCAATTAAAATAATAGCAGCAAGTACTATCAGAACACCAACAACCAAGACAATAACAATAAGTAACATGGGCCCCTA
Gma.9551.1.S1_at	AY157739.1	At4g09320	2e-72	Metabolism	Nucleotide Biosynthesis/Metabolism		GAGAAGAAAGGTTTCTACTTGAAAGGTTTGAAACTTGTTACTGTGGACCGTCCTTTTGCTGAGAAGCACTATGCTGATTTGTCTGCCAAGCCTTTCTTTAGTGGTTTGGTGGATTACATTATCTCTGGCCCTGTTGTTGCCATGATCTGGGAGGGCAAGAATGTTGTTACAACTGGCCGAAAGATTATCGGAGCCACAAACCCAGCTCAATCTGAGCCTGGAACTATCCGTGGTGACTTTGCCATTGACATTGGAAGGAATGTTATCCATGGAAGTGATGCAGTTGAAAGTGCTAACAAGGAAATTGCATTGTGGTTCCCTGAGGGCCCTGCTAACTGGCAAAGCTCCCAACACTCTTGGATCTATGAGTAAATCATATGCCTCAAGTTGATCTTGAAA…
Gma.9622.1.S1_s_at	BQ610840	At5g54160	2e-48	Metabolism			GATTCATATCAAGTTGCATTTGGATTTTGACTTTGAGACTCTGCTTGGGGTGCTACTTACGAATGTTTTCCCGGAAAAACGTAAATTTCTTCTAATGCTTTATGAAAAGAATAACGAACAAGTTCAATGTATACCGCCTTTATAAAATAATA
Gma.9622.1.S1_x_at	BQ610840	At5g54160	2e-48	Metabolism			TGAAGAACTGCTATGAGGCACTACCAGATAATGGGAAAGTGATTGTGGCGGAATGCATTCTTCCGGTGGCTCCAGACTCTAGCTTGGCCACAAAGGGTGTGGTTCACATCGATGTGATCATGTTGGCTCACAATCCAGGNGGGAAAGAGAGAACAGAGAAAGAGTTTGAGGCTCTGGCCAAAGGCTCTGGATTCCAAGGNTTCCAAGTCCTGTGCTGTGCTTTCAATACCTACGTCATGGAATTTCTCAAAAAGGTTTAAGTTCTTTGGCGTGGATTCATATCAAGTTGCATTTGGATTTTGACTTTGAGACTCTGCTTGGGGTGCTACTTACGAATGTTTTCCCGGAAAAACGTAAATTTCTTCTAATGCTTTATGAAAAGAATAACGAACAAGTTCA…
Gma.9686.1.S1_at	CD394819	At1g59950	7e-67	Metabolism			GACCAAGCAGATTGCACAGGCTCATGGCAAAACTGCAGCTCAGGTATGTCTTAGATGGTTATTTGAGCAAGGTGTGACTTTNATACCAAAGAGCTACAATAAAGAGAGATTAAAGGAAAATTTAGAGATATTTGATTGGTCACTCACCAAAGATGACCATGAAAAGATTAATCAAGTCAAACAGGAGCGTATGTTCAAGTACGGAACAGCAGCATTCCCGCTTCCTGATCTATTTGATGGGGAAACTTAGTAATACATTATCAGCTTCAATATTCCATTTTCCTTGGGATTTAGGTTTCTCGTGTCTGTGACACAATAAAAGGATGAAGTGTAATCTGTCTTTAGAATACCCTTAAAGAAACTCAAAATTGAAATCACTGGTTTCACTTTTTGTGGGAA…
Gma.8351.1.S1_s_at	AI443561	At5g19440	4e-99	Metabolism			AAATGCATCTTTTGGTTGGGTCAATGTGAAAGATGTTGCAAATGCCCATATTCTAGCATATGAGAATGCTTCAGCTAATGGAAGGTATTGTTTGGTGGAGAGAGTGGCACACTACTCAGAAATTGTGAAGATTTTACGTGATTTGTACCCGACATTACAACTTCCAGAGAAGTGTGCAGATGATAACCCATATGTGCCAATATATCAGGTATCCAAAGAAAAGGCAAAGAGCTTGGGGATTGAATATACTCCTTTGGAAGTGAGCCTCAAGGAGACTGTGGATAGCTTGAAAGAAAAGAAGTTTACCAACTTTTAATTTGTGATATCTCCTAGAGGAGAAAACGTTAATAATAGAAACCTTGTGTGGTTGGTCACTTGGCTTGTGATGCTCATGCTTCT…
Gma.8509.1.S1_x_at	AF320024.1	At2g26670	1e-101	Metabolism			GGTTATACCATTCCTGAACCTTCTTCTCCTGGTCTTACCTATGCACAATATCTTAAGGAGTTATCTGTGAAGGATCCCCAAGCATTCATTTGCCATTTTTACAATATCTACTTTGCTCATTCAGCTGGTGGTCGAATGATTGGGAAAAAGGTTGCTGAAAAGTTACTTAACAACAAGGCGTTGGAGTTCTACAAATGGGATGATGACCTTCCACGATTGTTGCAGAATGTGAGAGACAAGTTGAATAAAGTTGCTGAACCTTGGAGTCGGGAAGAAAAGGACCACTGTCTGGAAGAAACAGAAAAATCATTCAAGCTCTCTGGAGAGATTCTCCGTTTGATTTTATCATGATAATAGATGCCCTGCTATCTGTGTAATTATGGGTATTAAAGTGCATGG…
Gma.8179.1.S1_at	CD413439	At3g18860	1e-123	Metabolism			GTACTAAAGATGTCAGCAACCAAGATCATTGTTTAGAGTGTAAAATTGACATCTTTCTGCTGATGGTTGTGCGTTTGTTTTCAATTTCAAAACAANGAGCTGTTGCATTTTAGAGGATTCATTGAGAGTGACACATCAAAAGTAACCTCACAATTACAGATTTCCACCGTTCCTCCGTACTTTGAGACAATAGTTGGAACTTGGAAACCCATGACATGTTATCAGATAGATTGTGTAAACCANTTGAGCAANTTACAGCAACGATGTAGTCTTCCTCTC
Gma.8251.1.S1_a_at	AW394443	At4g34230	1e-125	Metabolism			GAAAGTATACTACTAGCACGACACACGCAACATCCATCCTTCCATCATGAAGAGTCTGGAAAAGTTATTAATTAATTGAGAACTAAAGCTGTATTTGTTGTTCACTCTAAAAAAGAAGCTGTGTTTTGTTTATTAAAAAGAGTGCTCTGTTTTCTCTGTTTTGGTTACACGACGTTCATTAAAATATAGTATTTGATATCAAATTCTCGTGGAAAGCAAAAGACACCATAGTTTTGTTGTGTA
Gma.8074.1.S1_s_at	BE823449	At2g44520	1e-101	Metabolism			TTTACCTCCCTGTGTTTATGTCTGGGCTTTTGATTCACCGTCGTTCTGAAAACGAACAATTCTTAGAAGACAAAGCAAAGGGTTTTGTGAAATCTGCATCCTCTACGGAGTCTTCAGAGTTGGATGATGATAACGGCGATCAAAATATCAAGGCCAGGCGTCCCTATCGGACTGAAGCGCGTCCTCCCGTATCGTATGCCTCTGTTGCACCTTTTCCCTTTTTGCCTGCTCCATCATATAACTTCCCTTGATATCTGTCAGTTATACGGATTTTGTATGACTTCAACATTTTCTCGGCCAAG
Gma.8020.2.S1_a_at	BG789780	At1g13280	4e-58	Metabolism			CTTGCAACAAGTTCACAATTTAACCACCTGTTACTTGT
Gma.8020.2.S1_at	BG789780	At1g13280	4e-58	Metabolism			GACTCAATGAGGATCCACATTTTTTTTGTTTCTTTTTTAAGGAAAAAATTCGGTTACAGTTTCTTAGGTGTTGTTCTCTAGTCAGAATTGGAGTTTTATTTCGACAATTTACGTAATAAAAGTTTTCATTAAAGGTTTATACAGATTGTCGAAGTGAGGCTTAATTTTCATAGAAGAACAGCACAAATTAAAAACTGTTTAAGTTTTCTCCTTAATTTTTATTTTTTTTAATTCTCTTCATTGTTGGCTTGGTTTGGAGACACTTGCAACAAGTTCACAATTTAACCACCTGTTACTTGTATTGAAATTTATTAATGTAGTAATTGTGGGTCAAGATGTCAGGTAGTAGTAGTAGAGTTTTTTATGTTGTTGAATAATGAAAGTGACAAGTGAGGTTGG…
Gma.8065.1.S1_at	AW309960	At5g16990	1e-130	Metabolism			ATATAAGCGGATTCGTTTGCAAGGCTTTAACTTCATGGATTTCGTTCACCTATATCCCAAGTTCTTGGAGTTTCTCCTGCCAAATATCAGAGAGGGGAAGGTTGTGTATGTGGAAGACATAGCTGAGGGGCTTGAGAATGGACCTTCAGCATTGGTTGGCCTTTTTAGCGGTCGCAATGTTGGAAAACAAGTGCTCGTTGTTTCTCATGAGTAAAAAGCATTTGTTTCTTGTGTTCA
Gma.6843.1.S1_at	CD402735	At2g28760	1e-179	Metabolism			TGTCCGGGAACACAAACTCGAAGTTTCTGNTATGTCTCTGACCTGGTTGATGGCCTTATCCGTCTCATGGNAGGATCAAACACCGGACCAATCAACCTTGGAAACCCAGGTGAATTTACAATGACTGAACTTGCTGAGACNGTNAAAGAGCTTATTAATCCAGGTGTGGAGATCAAGATGGTGGAGAACACTCCTGATGANCCNCGACAAAGAAAACCAGACATCACAAAAGCAAAGGAATTGTTGGGCTGGGAGCCAAAGGTCAAGTTGCGTGATGGTCTTCCTCGTATGGAAGAGGATTTCCGTCTGAGGCTTGGAGTTGGCAAAAAGAATTAACTTGTTTTTCGCTCCTTTGGTGACATGTTAAAGTAGAATAATAAGTGAGATGGGTCTGGCCCG…
Gma.6764.1.S1_at	AW394737	At3g23940	1e-119	Metabolism			GGAATGCCTGAGATGTTAACACCAACAAGTGCAATAATGGGTGCAGGTCTTGGAAAGGAAGTTGCATTATTGACTGATGGAAGATTTTCAGGAGGTTCACNNGGATTTGTGGTTGGCCATATATGTCCTGAAGCACAGGAAGGTGGTCCAATTGGCTTGATTCANAATGGAGACGTAATCAATGTTGACATCAAGAATAGGAGAATTGATGTTTTGGTATCAGATGAGGAGATGGAAGCACGCAGGAAAAAGTGGACTGCTCCTCCATACAAAGCTAACCGAGGAGCTCTGTACAAGTATATTAAAAATGTGACACCTGCTTCTAGTGGATGCGTAACAGACGAGTAGAAAGACATACCTGCAGAGCAAAAGCTGATAGTATGCCTTGGTGAAA
Gma.6917.1.S1_at	CD412438	At5g42740	1e-100	Metabolism	Sucrose Biosynthesis		TCCTCACAAGACATTCAGCGGCAATCGACCTTCTCTCAGCCTACTGCTTCCATCATTGAATGCTTATAATATTGGGCAGTTGTTGGCAATCTATGAACACAGAATTGCTGTAGAGGGTTTCATTTGGGGAATCAATTCTTTTGATCAGTGGGGAGTAGAGCTGGGGAAGTCNCTGGCTACTCAAGTCAGAAAGCAACTTAATGCATCTCGTACTAAAGGAGAACCAGTTCAGGGCTTTAATTTCAGTACTACAACAATGTTGACAAGATATCTTCAGGCAAGTTCAGATGTCCCAGCGGATCTGCCAACTGTTTTACCGAAGATCTAAGCACCTTTTTGCAGATTGTTATTTTGATGATTAAGAAGAAAATAATCTGGTCTTGTATAGCATGACCACGG…
Gma.6727.1.S1_at	Y10493.1	At3g26300	1e-103	Metabolism	Cytochrome P450	CYP71B	AGATCCCCAGTATTGGAGTGATGCAGATAGGTTTATCCCAGAGAGATTCAATGACAGTTCTATCGATTTCAAAGGAAATAGCTTTGAGTATATACCTTTTGGGGCAGGAAGGAGAATGTGTCCAGGCATGACATTTGGATTGGCTAGCATTACGCTTCCATTAGCTTTATTACTCTATCATTTTAATTGGGAACTCCCAAATAAGATGAAACCTGAGGATTTGGATATGGATGAACACTTCGGAATGACAGTTGCAAGAAAAAACAAGTTGTTTTTGATTCCCACTGTTTATGAAGCTTCATGATACACGTATTTT
Gma.6730.1.S1_s_at	BE211440	At2g36800	2e-72	Metabolism			GGGTGCCAATGCTTACGTGGCCACTATTTGCGGATCAGTTTTTGAATGAAAGCCTAGTGGTGCATGTACTAAAAGTTGGAGTGAAGGTTGGGGTGGAAATTCCGCTTACATGGGGTAAGGAAGTGGAAATTGGTGTGCAAGTGAAGAAGAAAGATGTTGAAAGGGCAATAGCAAAGTTGATGGATGAGACAAGCGAAAGTGAAAAAAGAAGAAAAAGGGTGAGAGAGCTTGCTGAGATGGCTAACAGAGCCGTAGAGAAAGGGGGATCCTCTTATTCTAATGTGACCTTGCTTATCCAGGATATCATGCAGAAAAACAAGAGAGATGTGTGATAAGTCCAAATTTTGTA
Gma.6651.1.S1_at	BQ629334	At3g10850	7e-19	Metabolism			AAGCTGGCCAAGCAACAATTCCCTCAACCATTGAGGATGAGTTGGAGACCAATCCCTTTATGAGGGTTGATCTACCTGAGATCCAGGAGAGGGTGGGCTGCAAGTCACCTGTTGAAGCATTAGGAGAGATAAGGAAGCAGAAAGACAATTGGAGAGGCTAATGAAACTAGCATTCTCATTTGTTGATATTTCATTTTCCTTTTCTGTTTTATTCATATGAATAAGGCCTTTATGTAGATACTGTAACAATATGTTTTGCCTGAAACTTAAATGACAGAGTCAGAGGCTTGTCAANTTAGGGGCATGGGTTGTGATTGGCATTGTCGCCTATATGCATTTTATGTTGGTTTTCCAAATACTAAGATGGTCTATTTCATACATGTCATTTACTTGTGAACT…
Gma.7435.1.S1_at	BU547689	At2g18560	9e-50	Metabolism			GGTTTGTATCGAGAACCCGCAAAGTGGGACTGTTGGTTCCGGAGTGGGCCCAACAGGTAACAATACTGAAGCATCGTTCTATTGGGGGTTTTCTTTCGCATTGTGGATGGGGTTCGACGCTTGAGAGCGTAACGAATGGTATTCCCTTGATCGCGTGGCCGCTGTACGCAGAGCAGAGGATGAACGCGACGTTGCTGGCGGAGGAGTTGGGNCNNGNGGTGAGGACCACGGTGTTGCCGACGAAGAAGGTTGTGCGTAGGGAAGAGATAGCGCGGATGGTGAGGGAGGTTCTTCAGGGTGATGAAAATGTGAAGAGCAATGGCATAAGGGAGAGAGTGAAAGAGGTGCAACGAAGTGCAGTGAATGCTTTGTCGGAAGGTGGTTCGTCCTATGTTGCTC…
Gma.7625.1.S1_s_at	U04526.1	At1g55020	0	Metabolism			GAGGGAGACTCCAAATTGGACTACTGATAAGAAGGCATTAGAAGCTTTCAAAAGGTTTGGAAGCAAACTGACTGGAATTGAAGGAAAAATCAATGCAAGGAACAGTGATCCAAGTCTGAGAAACCGGACTGGGCCAGTTCAGCTGCCATACACTTTGCTCCATCGTTCAAGTGAGGAAGGGTTGACTTTCAAAGGAATTCCCAACAGTATCTCTATCTAATTAAAAAGAGTTTGTGGTTTCCTTATCTATGTTGTACTTCTGAATAACATAGACTTTATGCATGTCTATGCGTAATTATTGCCTGAACTTCTGCACTAT
Gma.7613.1.S1_at	BG508937	At3g05970	5e-66	Metabolism			GTGAAAATTGAGAGTCTCCCCCCATCACCAACCACAACATAAAAAGAGAGAGGTAAATAAAGACACGCTACTCATACGCATCGTATGCAACATAGCAGAAGCATCCAATGGGAACGATTTTGCAACTTACTGTTGTATTGTATTGATAATAAAGAGTTGTGCTAGAACCGGAATATGATTCGTAGCATTATTTATGTAGCCTACGCTCCGTTACGTTCAAGTTGCCTTACGCCATTTTTATAATT
Gma.7310.1.S1_at	BQ630696	At5g54960	1e-117	Metabolism			AAATAAATGTTTGCTTTTCCAGATTTGTATCTGGTCTCGTGTTGCTGACTTGTTGACTTGTTGTAATCATGAACTATTATTGCTTTGTAATAATGTCTTGTATAATGGAATTGTTA
Gma.7310.1.S1_s_at	BQ630696	At5g54960	1e-117	Metabolism			TTCGCTGTGGACAAAAGACCATCATCTTTCTCATCAATAATGGAGGTTATACAATTGAAGTTGAGATTCATGATGGTCCATACAATGTGATAAAGAATTGGGACTACACTCGCTTTGTGGACGCTATCCATAATGGGCAAGGCAAATGCTGGACTGCCAAGGTACGTACAGAGGATGATCTGACTGAAGCAATTGCAAAAGCTACTGGACCACAGAAAGATTCACTATGTTTTATAGAAGTTTTTGTACACAAGGATGACACCAGCAAAGAATTGCTGGAATGGGGATCTCGTGTTGCTGCTGCTAACAGTCGTCCTCCTAATCCTCAATAGAAAATCATTTCCTAATTATTGGCCTGTTTTGTGTATTTTGT
Gma.7120.1.S1_at	BM093481	At2g38400	1e-176	Metabolism			GAGGCCTAATGCTAGGAGTTGAACTTGTCACTGATCGTGAACTTAAAACTCCAGCAAAANNTGAAACGCTGCATGTAATGGACCAAATGAAAGAATTAGGAGTACTTATTGGTAAGGGTGGTTACTATGGAAATGTCTTCAGAATTACACCCCCGTTGTGTTTCACCAAAGAAGATGCAGACTTTGTAGCAGACGCAATGGACTTGACCTTGTCTAGAATGTGAAGCTGAGCCAAGATCCTAGCTTTAATAAAAGTCTATTATATCATAAATGAAACTGTATTATCTCATCTCCATAGCTGGTAAAAATTACATAGATGCAGACTTATATAGCTAAAATAGCAGACCAATCTACTGTGATCTTAGGCTATGCATGAGCCAACAACTCGT
Gma.7251.2.S1_a_at	AW396102	At5g03290	7e-41	Metabolism			GGTATTGCACTTGCTGAGGCTGTACATGGTTCAGCACCTGATATTGCTGGAAAGAATTTGGCTAATCCAACTGCTTTACTGCTGAGTGGTGTTACAATGTTGCGCCATTTGGACCTCCACGACAAAGCAGAACAGATTCAGAAAGCTNTCCTCANCACGATTGCAGAAGGGAAGTACCGAACAGCTGATCTCGGTGGCAGTTCAAAGACAACTGAATTCACAAAAGCAATCATTGATCATCTTTAAATTTTGGTTGGAGTCAGCAAGAAATTCTTGCTTATGATTTTNGANTTTCAGTCAATTTTCTATCTATTTCCCCAATTAATCGGAAAGAATGGGATTACCTCAGCTTAAAGGAAAACTCACCCATGTTTGTGTGACATTTTACAACCAAAGNCA…
Gma.6263.1.S1_at	AW311303	At1g79550	1e-173	Metabolism			AAGACATTTGGTGAAGCATTGGATANGACNCAGACCNTNATTTGGAATGGACCAATGGGTGTTTTTGAGTTTGATAAGTTTGCCACAGGAACAGAGGCNATAGCCAAGAAACTGGCAGAGCTGAGTGGGAAGGGAGTNACNACCATCATTGGAGGAGGTGACTCNGTTGCCGCTGTGGAGAAGGTTGGNCTTGCAGACAAGATGAGCCACATCTCCACTGGTGGTGGTGCCAGCTTAGAGCTTCTTGAGGGNAAGCAACTCCCTGGTGTCCTTGCNCTTGATGATGCTTGAGNAAANATCANTNGTTCCTNTGNANTTTGTGCTTTATATTATTATTATGGTTGGNTTTCAGCCAACAGTGGATTNAGGTACAATGAGAGNNGCNNNNTNTTGCTCCTG…
Gma.6289.3.S1_a_at	AI437818	At1g12050	1e-31	Metabolism			GGTGTGGTGTCACGGACTAATCTAAAGCACTTATATTGGACATTGACCCAACAACTTGCTCACCATACAATCAACGGTTGCAACCTTAGGCCAGGCGATCTCCTTGGAACTGGGACAGTTAGTGGTCCTGAGCCAGAGTCCCGTGCATGCTTGCTAGAATTAACAT
Gma.6257.2.S1_a_at	BE658112	At5g17310	1e-58	Metabolism			GGCTATTGGGATTAATGTTCCTCGATCACGATTCCTTCCTGTGAAGGCAACTTCAGATTTGNTTCTTGTCCAGTCTGACCTCTACACTTTGGAAGACGGATTTGTCATTCGGAACAAAGCNAGGGAAAATCCTGAAAACCCTTCTATTGAACTGGGACCAGAATTTAAGAAGGTTAGCAACTTCTTGGGCCGCTTCAAGTCAATTCC
Gma.6192.1.S1_s_at	AW396773	At3g57520	1e-105	Metabolism			ATGACTCAGAGACCGGGTTGACAACCTTCTCCATTCCAGTTTCTCCAGAGGAGATGTACAGATGGTCAATAGAGATCCAAGTTTGAGTCCTTTTTAAGACTTGGTGTTTGATGCATTGTTGTATCAGGAGAAGGGTTTTGTTGTAATTAAGCATTGAGGGAATTGTTGGAGTCAGGCAGAGAGAGAGGGGGGAGGTTTGTTGTAAGACACCNTAGTATTAGTATCATGTAGTGGAGAAAAAGGGTTGTTGATCCTAATAGCTAGACAAGGCATGTTGTAGTAGTCATGGGGTGGGGAAGTCCTTTTGTTGTAGCATGTAATTTGGTTTAGACTT
Gma.6080.1.S1_at	BQ611386	At2g21045	2e-40	Metabolism			GTAACCATAGATGTCCATGCTGCCAAAGATCTGCTCAATTCATCTGGTTATCGTTATCTGGATGTTAGGTCAGTTGAGGAATTCAACAAAAGCCATGTTGAGAATGCTCATAATGTCCCCTATGTCTTCATCACAGAAGCAGGACGGGTGAAAAATCCAGATTTTGTTGACCAGGTGGCAGCAATATGCAAGANTGAGGATCATTTGATTGTGGCTTGCAATAGTGGAGGAAGATCACTCCGAGCCTCCGTTGATCTGCTTGATTCAGGATTTAAGAATATTGTTAACATGGGGGGAGGCTACTCTGCGTGGGTGNNATGCTGGATTTGCCGGGAACAAGNCAGGAGAAGACCTCAAAACTAGNTGCAAGTTCCGTCCTAANATCGCAAAACCCACTGC…
Gma.6037.1.S1_at	CD390794	At2g19070	1e-26	Metabolism			AAAGCCATTAGGTTATGCTGCTCAAAAGATAAGGGAAGCAGTTAACGCGGTTACGGGTGAGTATGTAAAGTCACAATTAAGTGTTGGTTTAGGGCAAGAGCAAGTGGATCACATTAGGGCTTTTTTCATGGGACAAGGACACGGTACAAAACCGGCGTATGCTAGGGATCATAACATTCTCCTCACNAGCTGGATGAACATGCCAGTGTATGAAGCTGATTTTGGTTGGGGAAAGCCTATGCAATTCACTTTAGCACATGTGTTTCAACAAGTTGATAGGGTAGGGATTTTTCCAAGCCCAGATGGAGACGGTGTTGTTGTCTACCTTAATTTCGAGACAGCACAATTGCAACTTTTGAAGAAGTTGTTCTACGCGGATATGTATGTATCCTCATTATA…
Gma.6005.1.A1_at	BM188184	At5g61510	4e-48	Metabolism			GGGATCTTTGGCATGCTTGAAGCTTAGGGGCTACATGGTAAGTTTTGGGCAGTCATCTGGTTCACCTGATCCGGTTCCATTATCTTCCCTGGCNNNNNAANNNCCTTTTCTTGACTAGGCCTAGTCTAATGCAATATGTTGTCACTCGGGATGAGCTGTTGGAGGCTGCTGGAGAGGTGTTTGCTAACGTTGCTTCTGGTGTGTTGAAGGTCCGTGTTAATCATACTTACCCATTGTCTGAGGCTGCAAAAGCACACGAAGACCTGGAGAATCGAAAGACNTCAGGATCTGTTGTGTTGATACCCTAAGACTCTCAGTTGTGTATGTGTTATACACCAAGTCCTTGTTT
Gma.6019.1.S1_at	AI431179	At2g20420	1e-153	Metabolism			GGGTACTCCTGCCAATTTTCTGGATGTAGGTGGCAATGCCTCTGAAAACCAGGTNGTTGAGGCATTTAAAATATTGACTGCTGATGACAAAGTGAAGGCAATTTTGGTTAACATTTTTGGNGGTATAATGAAGTGTGATGTTATAGCAAGTGGAATAGTGAATGCTGCAAAAGAGGTTGCACTGAAAGTACCNGTNGTAGTTCGTCTGGAAGGCACCAATGTTGATCANGGAAAAAGAATNTTGAAGGAAAGTGGTATGGCNTTNATAACGGCTGAAGATTTAGATGATGCNGCTCAGAAAGCAGTGAAAGCTGCTTACAAATGAAGGNTTACTTCTGCTCAAATTTAAAATTCAGTTTAGTTGCAACATTATTTTTGGTGTTAAAACATATTTTCACG…
Gma.6611.1.S1_at	U25027.1	At3g08510	0	Metabolism			TGCCTACCTATCTGGGAGCTTAGAAGTGGCATTCGAGCAATTCCACTGCATAGCCAAAAGGGNGATAAATACAACACTGTAAAGCTTCTCATGCGCTTTGANTTTATTAATAATTGATTCTGTGCAGTGCATGTGCA
Gma.6593.2.S1_at	CF923087	At1g53580	5e-41	Metabolism			GATTTTAACACTGCCCAAGAGTACGTTAATCTATCCAGCTCATGACTACAAAGGATTCACTGTGAGCACTGTTGGAGAGGAGCTGCAAAACAATCCACGCATAACAAAGGATGAGGAAACTTTCAAGAACATCATGGGAAATCTTAACCTGTCATATCCTAAAATGATTGACATAGCTGTCCCAGCTAATATGGTTTGCGGAATCCAATCCAATCCAAAGCAAGCTGAGGCTTCATAAGCCTTATCTGAGAGTCACACACTGATGTTATTTGACACAAAGACCTTGCAAGCAAAAGGGGGAAAAATTGTTATAGCCCTTTGAATTGAAGAGAAAAATGGAAATTGTAAATAAATAAAATGGTATTTGTGTTGTGGCCCAAT
Gma.6602.1.S1_x_at	CD415212	At3g02780	1e-121	Metabolism			TTGGGTCGCATTCTTTACAAGGCACCTTCTGATGGCAAATGGGGAGAGCATGAACTGGACTATCTGCTTTTCATTGTCCGGGATGTTAATGTGAACCCCAATCCTGATGAAGTGGCTGATATCAAATATGTGAACCGTGATCAGTTGAAGGAGCTGTTGAGGAAAGCTGATGCAGGTGAGGAAGGTCTGAAGCTATCACCTTGGTTCAGACTAGTTGTGGACAATTTCTTATTCAAATGGTGGGACCATCTTGAGCAAGGAACTCTTGGGGAGGCCACTGACATGAAGACCATTCACAAGTTGACATAAGTAAGTTCAGAGGAGCTTCCTGCATCCCTGTAATGAAGGGTGGCTGCATTCCGACC
Gma.6602.2.S1_s_at	BI320883	At3g02780	1e-94	Metabolism			AAGTATGAGTTGCTTCTTCAGCAACGATCTGCAACCAAGGTAACATTCCCTCTTGTGTGGACAAACACCTGTTGCAGCCATCCACTGTACCGTGAATCTGAGCTTATTGATGAGAATGCCCTTGGAGTAAGAAATGCAGCTCAGAGGAAGCTTTTGGATGAGCTTGGTATTGTTGCTGAAGATGTACCAGTTGATCAGTTCACCCCATTGGGTCGCATTCTTTACAAGGCACCTTCTGATGGCAAATGGGGAGAGCATGAACTGGACTATCTGCTTTTCATTGTCCGGGATGTTAACGTGAACCCCAATCCTGACGAAGTGGCTGATATCAAATATGTGA
Gma.6550.1.A1_at	CD402638	At5g54160	2e-31	Metabolism			TGAGGCACTTCCAGACAATGGGAAGGTAATTGTGGCAGAATGCATTCTTCCAGTGGCTCCAGACTCTAGCTTGGCCACAAAAGGTGTGGTTCACANTCGANTGTGATCATGTTGGCACATAATCCAGGTGGGAAAGAGAGNACAGAGNNAGAGTTTGAGGCTCTGGCCAAAGGGTCTGGATTCCAAGGTTTCCGAGTCCTGTGCTGTGCTTTCAANACCTACGTCATGGAGTTTCTCAAAAAGGTTTAAGTTCTTTGGCGTGGATTCATAAGTTGCATTTGAGTTTTGACTTTGAGACTCTGCATGTGGTGCTACTTACAAAAGCTTTCCCGGAAAAATGTAAATTTCTCTTAATTCATTAGGAAAAGAATAATAAACAAGTTCAATGTATACTGCCTT…
Gma.6570.1.S1_at	AW350797	At1g30620	0	Metabolism	Galactose Metabolism		GCAAAAAGCTCATCGTAACGGTTACGGTATTTCATCTGCAATCTGAGTTTCTAGCCATTCAGCCAAGCAGTTGGCCATCAACTGCTCTTTTACATGGTGCTCAGGATTTTTTTTTTNCTTTTTCTTTTTGGTCGTCCTTAGGGAGTTTGGTAGTTGATTCGTTATACTTACATGTGTATTCAACATACAATGAGTCAATAATAATAAATAATATAATGCCCAGCCTCTGGTTGGT
Gma.6570.1.S1_s_at	AW350797	At1g30620	0	Metabolism	Galactose Metabolism		CAAAGTAGACTACCTTCCACGTCGACCCGGCGATTATGCCGAGGTGTATAGTGACCCTTCTAAGATCAACAGGGAACTGAATTGGACCGCACAATACACTGACCTTGAGAAGAGTTTGCAGGTTGCATGGAAATGGCAAAAAGCTCATCGTAACGGTTACGGTATTTCATCTGCAATCTGAGTTTCTAGCCATTCAGCCAAGCAGTTGGCCATCAACTGCTCTTTTACATGGTGCTCAGGATTTTTTTTTTNCTTTTTCTTTTTGGTCGTCCTTAGGGAGTTTGGTAGTTGATTCGTTATACTTACATGTGTATTCAACATACAATGAGTCAA
Gma.6540.1.S1_at	AW309284	At4g39330	4e-86	Metabolism			GTTGCCCATCTTGGAATTGCTCAAAGTCAACGGGACCTTATTTCTCGTGGGTGCACCAGACAAGCCCTTACAATTGCCNGCTTTCCCATTGATATTTGGCAAGAGATCAGTGAAAGGTGGGATCATAGGGGGAATAAAAGAGACGCAGGAAATGTTGGAGGTTTGTGCAAAGTACAATATAACGAGTGACATTGAATTAATCACACCAGACAGAATCAACGAGGCTATGGAGCGCCTTGCTAAGAATGATGTGCGCTACCGTTTCGTCATTGATATTGCTAATGCTGCCGCTTCCAACAACTAAACTAGCCTTCAATTCGGATCAAATTTTACTTGTTTCGATATTTACTGTTTAATAGACCCGTGATTTTACCTCTGCAATTGGACGAATAAGTCATA…
Gma.6545.1.S1_s_at	BQ627693	At3g09820	1e-156	Metabolism			GGATTTCTTTCACAATTGGTTAAGCATAAGCCCATTGAAGAATGCATTAGAGCTGGGTGTTATGCAGCCAATGTTATCATCCAAAGGCCTGGCTGCACATACCCACCGACGCCTGATTTTCATTGAGTGATTCCTCTTTTTCTGTTACTGCTATGAATTTTTTTCTTTTTATCATTGAGAAGGATTTTAATAGCCACACTCTAACTGGTGTGGGGTTTTTTAACCCCCCGNCTAGGGAAAACANCGTGAAAAAGTTGCAGNAANNGAGATAAAACTTGAATAAGTTCATATATTTGAAGTCCGATCA
Gma.6442.2.S1_at	BM270161	At1g52760	1e-34	Metabolism			GCTCACGGAACTTCTGACGGCGTTACCTGCCCNNCNTCNNCCAAGCTGCTGTATGAGAAGGGTTCCAGTGAGGATAAGACGTTGAAGCTCTACGATGGAATGTATCACTCTTTGATTCAGGGAGAGCCCGATGAGTCTGCGAATCTCGTGTTGGGGGACATGAGAGAGTGGATTGATGAGAGGGTTCGACGGTATGGACCTAACAAAAATTCCCAGTGAAACAAACCATTACTAAATTCCTATTTTGGTTCCACATTGNNTATTTTGTGTCTATCAAAACTTTATTAAAGTTGTTATGTGAAGACGGAAGAGTATCCTTCTTCTATCATATTTGGATTTCAATCAAAAATGACATTTAATCAATCCAGTTATCGG
Gma.5819.1.S1_at	BF219559	At2g17630	3e-47	Metabolism			GAGATCTTTGATGAATGTGCCTTTCACTTTGGAGAAATCAGAGCTGGAGGGTGAGTTTATCAAGGAGGCTGCTAAAGAGAAGATGGTGCAGCTCAAGGGACATAGATCAGTGGGAGGTATGAGGGCTTCTATTTACAATGCCATGCCCTTGGCTGGGGTTGAGAAGTTGGTGGCTTTCATGAAGGATTTTCAGGCAAGGCATGCCTAAAGGAGTAACCTCAATCTGAAACAAATACTTGCATTGCATAAACCTAATGCCTAAAGGATTTTATGCTAATAAAGTGTTTGTCTGGTATTCAGAAAGGGTCACAATCTCTTGTCAGTTTTTTGCTTTCTTTAGTTAGGTATCTTTGCTGTCTCTTTTTGTTTACTTTCTTGTTCCATGTTTGATATTCAAAT…
Gma.5913.1.S1_at	BM731481	At1g74920	0	Metabolism			AATGACACTGTATATGGCTTGGGTTCTGCTGTAATATCAAATGATCTAGAAAGATGTGAGCGCATTACTAAGGCTTTTAAGGCTGGAATTGTGTGGATTAATTGCTCTCAACCATGCTTCACTCAAGCCCCATGGGGAGGCATTAAACGCAGTGGTTTTGGTCGTGAATTAGGAGAATGGGGACTTGATAATTACTTGAGTGTGAAGCAAGTGACCCAATATATCTCTGATGAACCGTGGGGCTGGTACCAGTCTCCTTCAAGGCTGTGATAGGTATCCAAAAGCTAACATTAATAAGTTGTGGGTAATATCAAATTACGATTATGACCCCAAAGTCGAGAAGA
Gma.5803.1.S1_a_at	BU084390	At5g03630	1e-114	Metabolism			GGTCTTTCTGGAAGGTGGAACTCCTGAAGANAACCAGGCTATTGCTAAAGTTGCTAAGGTCCAGCCTCCGGTTGCGGATGTAAATCAACTTGCTAAGGAAGGCCTTTCCTTTGCTAGTAAAATATAATGG
Gma.5803.1.S1_at	BU084390	At5g03630	1e-114	Metabolism			GAAGGCCATCAAGGCAGCTGAGGAAGGAANAACAGTTGAGGAGTATGATTACCTTCCATACTTCTATTCCCGTTCATTNGATCTGTCTTGGCAATTCTATGGCGACAATGTCGGCGACACAGTNCTATTCGGAGACAACAATCCTGCGTCNTCAAAGCCNAAGTTTGGGACATACTGGATTAAAGANGGGAAAGTTGTNGGGGTCTTTCTGGAAGGTGGAACTCCTGAAGANAACCAGGCTATTGCTAAAGTTGCTAAGGTCCAGCCTCCGGTTGCGGATGTAAATCAACTTGCTAAGGAAGGCCTTTCCTTTGCTAGTAAAATATAATGGTTTTATTTGGGAAGGATAAAGATGCTTGGTGGTTTGCATAGATTGTATCTGACAGGCTTTATTTTACT…
Gma.5803.2.S1_at	BU761097	At3g09940	9e-15	Metabolism			CGAGCGGCACGAGATACTGGATTAAAGATGGGAAAGTTGTTGGGGTCTTTCTGGAAGGTGGAACTCCTGAAGAGAACCAGGCTATTGCTAAAGTTGNTAAGGTCCAGCCTCCGGTTGCAGATGTAGATCAACTTGCTAAGGAAGGCCTTTCCTTTGCTAGTAAAATATAATGGTTTTAATAGGGAAGGATAAAAATGCTTGGTGGTTTGCATAGAAGATTGTATCTGATCTGGCTTTATTTTACTCTGAATTATGCATTACAGAAACTTTATTTTGTGTTTTTCGTTTGATGTGGTTGCACGGGATATATATATATATATTGCCGTATCTATTTCATTTCTCTGGCCACTTGTTGGGTTCTGTTTACGATTTCCAGACTTATAAACGCATCTATTTGCA…
Gma.5787.1.S1_at	BQ298856	At5g66280	2e-66	Metabolism			AAGCCATGTGGCTGATGCTGCAGCAGGANAAGCCCGATGACTATGTTGTGGCCACNGAAGAGTCCCACACCGTNGAGGAGTTCTTGGAAGTCGCGTTCGGCTATGTGGGACTCAATTGGAGGGACCATGTCGTCATTGACAAGAGNTACTTTCGCCCCTCTGAAGTCGATAACCTCAAAGGGGACGCTTCCAAGGCCAAGAAGGTGCTTGGTTGGAAACCTAAAGTGGGGTTTGAGCAGCTTGTGAAGATGATGGTTGACCGGGACATTGAGATGGCTAAGAAAGAGAAGGTTCTTGTTGATGCTGGCTACATTGATGCTCAGCAACAACCTTGAATCTCATCTGCAACTTGAGGAAGAGGGGNTTTTGCTGTTTTGATCATATAATGCCGTTGACATA…
Gma.5790.1.S1_a_at	BU549012	At5g23670	0	Metabolism			GATCCATATAATTGTTCTCAGATTCAAGTGAACGTCTCTTGGAGGGAAGTCTGTTCTTATTTTGCCCAGTCATTAGATA
Gma.5674.1.S1_a_at	CA937173	At3g58610	1e-117	Metabolism	Amino Acid Biosynthesis/Metabolism		AATCCTTTCATGCATGCTCGTGGTGTTTCTTTCATGGTTGATAACTGTTCAACCACAGCTAGGTTGGGTTCGAGGAAATGGGCTCCACGATTTGACTACATCCTAACCCAGCAGGCCATGGTGGCTGTGGACAATGGAACTCCTGTTAACAGGGACTTAATCAGCAACTTCCTGTCAGACCCAGTGCACGGAGCCATTAAAGTTTGCGCTGAACTGAGACCCACAGTAGACATTTCTGTGCCACCAGATGCAGACTTTGTTCGTCCGGAGTTGCGTTCTAGCAATTAGAACTTAAAAGCAATTATGGCTTTCACTTCGAATCTTTTTCAGATTTCTCAGAACTGCAGTTATCTTGTTAGTTTGGGTTTTCATGATTGGATGCTAGTGTGTAAGTTGTAT…
Gma.5637.1.S1_at	AY126715.1	At2g47180	1e-148	Metabolism	Carbohydrate Biosynthesis/Metabolism		TGCTGAACAGGATTTTTTGAACATGTACTTCAAGGACAAATATAGGCCAATTCCTAATGTCTANAATCTTGTGNTGGCCATGCTGTGGCGTCACCCTGAGAACGTTGAGCTTGANAAAGTTAAAGTGGTTCACTACTGTGCTGCTGGNTCTAAGCCTTGGAGGTACACNGGGAAGGAGGANAATATGGAGAGAGAAGATATCAAGATGTTNGTGAAAAAGTGGTGGGATATATATGAGGATGAGACTTTGGACTACAACAATCCACTCAATGTGGATAAGTTCACTGCGGCACTTATGGAGGTTGGTGAAGTCAAGTTCGTCCGTGCCCCATCTGCTGCTTAAGAGTGTCTTTGGAAATCAAGTGTGATCCAAGTACATGTACAAAGTCATACATCATT…
Gma.5590.1.S1_a_at	BE822176	At1g22410	1e-130	Metabolism			GTTACCACACACACTGTGACCCAAGGCTCAATGCTTCACAATCTCTTGAGCTTGCTTTCATCATCGCNGAGCGTTTGAGAAAGAGCAGGATCAGATCGCAGCAACCTCTTGCCCCTCTAGGAGT
Gma.5590.1.S1_at	BE822176	At1g22410	1e-130	Metabolism			ACGAGGATGGGAGCTGAAAATATGAGGGTGAAGCTTCCACATCTCATCAGGGCAGTGCGCAGAGCAGGNCAAATTGTCACNTGGGTCAGTGATCCTATGCATGGAAACACCATTAAGGCTCCNTGTGGTCTTAAAACTCGCCCCTTCGATTNCATCAGGGCNGAAGTGAGAGCATTCTTNGANGTNCACGAGCAAGAAGGAAGCCACCCAGGAGGGGTTCATCTAGAGATGACGGGTCAGAATGTGACCGAGTGCATTGGTGGGTCAAGGACGGTCACATTTGATGACTTGAGCTCACGTTACCACACACACTGTGACCCAAGGCTCAATGCTTCACAATCTCTTGAGCTTGCTTTCATCATCGCNGAGCGTTTGAGAAAGAGCAGGATCAGATCGCAG…
Gma.5606.1.S1_at	BI971017	At5g02230	5e-99	Metabolism			TTGTAATGGTTCAGGCACCTCTCAAATCTTTGACATNATAGGGCATTTTGCTCAGCNCAATCCCNGTGCAGTCNTGCCAAAGACACCAATTGTTTGCAAGCCATCAGAAAATGCCATTGAANTGGCCNTCAANATAGCCAANCTTAACCCACANAGAACTTTGTTCTTNGAGGACAGTACCCGCAACATACAAGCTGGAAAACGTGTGGGGCTTCACACTGTGCTGGTTGGTACATCACAAAGATGTAAAGGNGCAGATTATGCNTTGGAAAGCATTCACAACCTTAGGGAGGCTGTGCCTGAACTATGGGAGGCTGATATAAAATCAGAAGNTGCATACCCTGGAAAGCTAGCTGTGGAGACA
Gma.5609.1.S1_at	CA935501	At3g53620	1e-91	Metabolism			ATAAACATTCTGATTTCCGTGCCGTTCTGTTATGGCACTACTGCTGCCTCGGTTCTTGACACAACAGTGTCAAAAACTTTCTGCTTTGGGATGCGGCTGTACTGCTACTCAATAATGAGTTCATTTCTAGTATTGAAGAGNNNNTCCTTTGTTTGGTATTGGAGAAATNGTAACACATGAATNAANTTTCAGTTAAGCAAATTCCTCGAGTTTTATTGTAT
Gma.5611.1.S1_at	AW309826	At4g37360	1e-110	Metabolism	Cytochrome P450	CYP81D	TACCACACGTGGCTTCAGAAGACATCAATATCGAAGGATTCAATGTTCCACGAGACACAATTGTGATTATTAATGGTTGGGCCATGCAAAGAGATCCTAAGATATGGAAAGATGCGACAAGCTTTAAACCTGAGAGGTTTGATGAAGAAGGAGAGGAGAAGAAGTTGGTAGCATTTGGTATGGGAAGAAGGGCTTGCCCAGGAGAACCCATGGCTATGCAAAGTGTTAGCTATACTTTGGGATTAATGATTCAATGTTTTGACTGGAAACGAGTAAGTGAGAAGAAGCTTGATATGACAGAGAATAATTGGATCACCTTGTCAAGGTTAATTCCATTGGAGGCTATGTGTAAAGCCCGCCCACTCGCCAGCAAAGTTGGAAGTTATTAACAATATTTTA…
Gma.5618.1.S1_at	BU549496	At2g05710	0	Metabolism			TGGGTATTGTTCCTCTTTGCTTTAAATCTGGTGAGGATGCTGACACATTGGGATTGACTGGTCACGAACGTTATACTATTGACCTCCCAAGTAACATCAGCGAGATAAGGCCTGGCCAAGATGTCACNGTAACAACNANTACNGGAAAATCTTTCACCTGCACAGTTCGCTTCGANACNGAGGTGGAACTTGCTTACTTTAACNATGGGGGCATTCTTCCNTATGTCATCAGGAACCTCATTAAGCAGTGAAGTCATGGCTGATGGGAAATGTTAAACNATGTTGCCACTGCGTGTACACGTTTTGAGTGGTNNNAATANAATGTGAGAGAAATGAGAATAAATTCAATAAATAGGAAAGATCCCTTCTTAAGAAGGCAATTTTTTGACANTTCCAGGT…
Gma.5529.1.S1_at	AW432588	At1g59950	7e-95	Metabolism			TAAGTCAAATCAGCCAGAGCCGTTTGATCAGCGGACCCACCAAACCACAACTCGCTGATCTCTGGGATGATCAAATATAAACTATTTACTACTATGCAGCTCCCACTCTATTTTTATAATCCATCTTTTTACCTCTTGTTTCATTTTACGTTTAAATAATTCATGCCATGCCACTTCTTATTTTAGATTTCACAATCAATAAACTAGGCACGCGCGGCACATGATATGAA
Gma.5578.1.S1_x_at	BE659192	At2g40890	0	Metabolism	Cytochrome P450	CYP98A	GAAGCAATGAGGCTTCACCCACCAACCCCACTAATGCTCCCACACCGTGCCAATGCCAATGTCAAAGTTGGAGGCTATGANATTCCNAAAGGGTCCAATGTGCATGTGAATGTGTGGGCNGTGGCCCGNGACCCGGCNGTGTGGAAGGATCCNTTGGAGTTCCGACCCGANAGGTTCCTTGAGGAGGATGTNGACATGAAGGGCCATGACTTTAGGCTACTTCCATTCGGGNCGGGTCGNCGNGTATGCCCGGGTGCCCAACTTGGTATCAACTTGGNANCATCCATGTTGGGCCACCTCTTGCACCATTTNTGTTGGACCCCACCTGAAGGAATGAAGCCTGAGGAAATTGACATGGGAGAGAATCCAGGGCTAGTCACATACATGAGGACTCCAATA…
Gma.540.1.S1_s_at	AW598718	At2g26670	2e-96	Metabolism			ATGCTGAATTCAGAAACACTGGATTGGAAAGGTCTGCAAGTTTGGTAGAAGATTTGGATTGGTTCAAGGAGCAAGGTTATACCATTCCTGAACCTTCATCTCCTGGTCTTACCTATGCACAATATCTTAAGGAGTTATCTGTGAAGGATCCTCAAGCATTCATTTGCCACTTTTACAACATCTACTTTGCTCATTCAGCTGGTGGTCGAATGATTGGGAAAAA
Gma.5478.1.S1_at	AW350606	At4g34135	1e-132	Metabolism			CAAGTGCTAATTCTGGACCATCAAGCTGTGGGAGCCTTTGTCACACACTGTGGATGGAATTCCACGCTCGAAGCAGTGTCGGCGGGGGTCCCCATGCTCACCTGGCCCGTCTCTGCAGAGCAATTCTACAATGAAAAGTTTGTGACCGATATACTTCAAATCGGGGTCCCTGTTGGTGTTAAAAAATGGAATAGAATTGTGGGGGACAACATAACCAGTAACGCGCTTCAGAAGGCACTCCATCGTATAATGATAGGGGAAGAAGCAGAGCCTATGAGAAACAGAGCACACAAACTGGCGCAAATGGCAACAACGGCGCTCCAACACAATGGATCATCTTACTGCCACTTCACTCATTTGATACAACACCTTCGCTCCATTGCAAGCCTTCAAAATTAA…
Gma.5491.1.S1_at	AW309940	At2g23910	7e-61	Metabolism			TACGAGGATGTCTCATCCTACGGTCGTTATTTGTG
Gma.5503.1.S1_at	CD405755	At3g15730	1e-104	Metabolism	Phospholipid Biosynthesis		GTGCCAGAGATTCTGAGATTGCCATGGGTGCTTATCAACCATTTCATTTGGCTGCCAGGCAGCCTGCCAGGGGACAGATCCATGGTTTCCGCATGTCGTTGTGGTATGAGCACCTTGGCTTGCTTCATGACTCTTTCCTCCACCCTGAAAATGAAGAATGTATTAAGAAGGTGAACCAAATTGCTGACAAGTATTGGGATATCTATTCAAGTGAGTCACTTGAGCATGACCTTCCTGGTCACCTGCTCCGATATCCTATTGGGGTTTCCAACGAAGGAGTTGTCACTGAGCTTCCAGGATTTGAATTCTTCCCTGACACCAAGGCTCGTGTTCTTGGCGACAAAGTTGATTACCTTCCACCGATCCTTACTACTTAAGTTTCATTTTATAAGCTTGTTA…
Gma.5510.1.S1_at	AF135485.1	At5g06900	4e-96	Metabolism	Cytochrome P450	CYP93D	GTGGCTTGGTAGTTATTCCCGTCCATTTCTCTAATGCTGCCTAATAATTTAAAG
Gma.5510.1.S1_s_at	AF135485.1	At5g06900	4e-96	Metabolism	Cytochrome P450	CYP93D	CACATGGGCCATTGGTAGGGATCCAAATTACTGGGATGACGCACTCGAGTACAAGCCGGAGAGGTTCTTGTTCTCCGACGACCCGGGCAAGAGCAAGATTGACGTGAGGGGGCAGTACTATCAGCTCCTGCCCTTTGGGAGCGGGAGAAGAAGCTGCCCCGGAGCCTCGCTAGCGTTGCTTGTCATGCAAGCAACGCTAGCGAGTTTGATCCAGTGCTTCGACTGGATCGTTAATGATGGTAAAAACCATCATGTTGACATGTCTGAGGAAGGGAGGGTGACTGTGTTTTTGGCCAAGCCACTCAAGTGCAAGCCTGTTCCGCGTTTCACTCCGTTCGCTGCCTGAAGACTGTGAATGGAATGGTTTCTCTAGTTGTGTGTGCTTTACCTACTCTATAT…
Gma.5513.1.S1_s_at	AW310453	At5g02230	1e-111	Metabolism			CTTGCTGTGGAGACATCTGTGACTGCTTAGATCATTGATGAACAAAAAAATAAAATAAAAAAANTAAGAAAAAGAGAGAGAAAGAGAGAAGTCCTTTGTGAATTTCCCGAGTTGGGATGTAGTAATTGTATGTAGTTGATGTAGATGCTTTGATCATATTACAATTAT
Gma.4902.1.S1_at	CD398435	At3g15730	0	Metabolism	Phospholipid Biosynthesis		ATGGGTGCTTATCAGCCCTATCATTTGGCTACCAGGCAGCCNGCACGTGGNCAGATNCANGGTTTCCGCATGTCATTGTGGTATGAGCACCTTGGCATGCTTCATGACTCCTTCCTCCAGCCAGAAAGTGANGAATGCATTAANAAGGTGAACCAAGTTGCTGACAAATATTGGGATCTGTATTCTAACGAGTCACTTGAGCATGACCTTCCCGGTCACCTTCTCCGCTACCCCATCGGGGTTGCCAGTGAAGGAGATGTCACCGAGCTGCCAGGATTTGAATTCTTNCCCGACACCAAGGCTCGCATTCTTGGTGGCAAAGCTGACTACCTCCCCCCTATTCTCACTACTTAATTTGATTTTGTACTTTGTTACAAACTTGTTATTGCTTACATCCTA…
Gma.5129.1.S1_at	CF920232	At5g22140	1e-125	Metabolism			ACAAGGGATGTATGCAAGTGCTCATGCTCAAGTGGTTGCCAAGAACCTGAAGCTATTGATAGAGGGAGGAGGCAAAGAGCGTAAGTTGGGAACATACAAGGCACAGCCACCAATATCTATAGTTTCACTTGGAAGGAAAATAGCTGTTGCACAGTTCCCATTCATGACTGTGCTTGGAAGGCTTCCTGGCATGATCAAGTCAGGGGATTTGTTTGTTGGGAAAACCAGAAAGGAATTAGGACTCGAACCTAATGTTAAAAAATCTTAAATTTGGTATATTGAGTGAGTGTTGTGGTGTGTAATTGTGTATATACACTTCTTCAACTCTTTTTCTTCCTTGTCATTGTTGTGCATGTGTAAGTTGATTGTATGTGTTTACTTTCCTATTGTAT
Gma.4839.1.A1_at	AW310019	At5g57850	6e-09	Metabolism			TCATCGTCTGGGATGATCAACCCATTGGCAATGGAAGGGTGGGAGAATTAACAATGTTACTTTCGGATATGCTTTGGGATGATATGGTAGCTGGCCCTGGCACACAGAGGATACCTGTTCCTTATGTTGAGTAAACCTACAAAGTCATCAAATTACAGGCTGGGAACAACTTTCTTACTTTTCTATGTCATGTTCNTAGGAGTTCTCCTTGCAAAGATTTATCAAGAGGTTTCTCTTTGTATTTGCTTTTTGTATTTCNAAGTGTGAACACTGAACAAGTCCTTAAGTGAAGCACCAGGTGTTTCCTGCAACACAAAATTNACGTAGCAGATAAATAGTCCTTGAACTGTTTCACGTTGTTG
Gma.4839.2.S1_at	BI974385	At5g57850	2e-58	Metabolism			TCTCTTCATCATCCGAGTTGCTTGAAAAGCTTCATGAAAAATGGAGTTCAGTGGAGAAACCACCATACCCAGCTATGTATTCTAGTATTTATGGAGGTATCATACTTGATCCAGCAATGATGGTAATCCCCATTGATGATCACATGGTTCACAGAGGGCATGGTGTGTTTGATACAGCTATTGTTCTAGATGGATACCTCTATGAGTTGGATGTTCACCTTGACAGATTCCTAAGTTCAGCCTCCAAAGCAAAGATATCCTCTCCCTTTTCTCGATCAGTGCTTCACAGCATTCTAATACAACTAACTGCAGCATCAAAATGCAAGAAGGGAACTCTAAGATACTGGCTCAGTGCAGGTCCTGGAGATTTCTTGCTATCATCAGCAGGATGTCCAACAT…
Gma.5046.1.S1_s_at	L43921.1	At3g12120	1e-147	Metabolism			TTATGGAATCCTGAACAAGGTCTTCCATAATATTACAGACACTCATGTAGCNCATCACTTGTTCTCCACAATGCCACATTATCATGCAATGGAGGCNACAAAGGCAATAAANCCCATNTTGGGAGAGTATTATCGGTTTGATGNGACTCCATTTGTCAAGGCAATGTGGAGAGAGGCAAGAGAGTGTATTTATGTGGAGCCAGATCAAAGTACNNAGAGCAAAGGTGTATTTTGGTACAACAATAAGTTGTGATGATTAATGTAGCCGNGGNCTTCTTNNNNNNNNNNNNNNNNNNNNTGAACTTTCCNTTGTGACTGTTTAGTATCATGNTTGCTTATTGGGAATAATTTTGTTGAACCCTGATGTTGGTAGTAAGTATCTA
Gma.4529.1.S1_at	BI967748	At1g12000	1e-129	Metabolism			AACTGCACTCACCTCAATGATGGATGTGGAGAGGAGGCATGGTAAATTCAAGCCCGTGATCAAGAAAGCAATGGTGGAGCTTGAAGGGGCACCCTTCAAAAAGTTTGCCTCCTTGCGTGATGAATGGGCCCTGAAGAATTGCTACATCAGTCCAGGTCCAATTCAATTCTCTGGCCCAGGATCTGAAGTAATTAATCACACTCTACTCTTGGAGCTTGAAGCACAAGCTTAGGCATAATATGAGGTCCTTGTTTTGACGGTGGCAATTCATATTGTTTTTTGGGATCTTTCAATATATATTTGATCTGTTACTGTCTAGTGTTTGAGTTTACTTGTGAAATTAATCAGTTAATGATTCTTGAGTTGGTTGATGAGTATGAATTGGTCAACTCAAAAGTT…
Gma.4624.1.S1_s_at	CF921137	At2g43900	0.0003	Metabolism			GAACTCAAGTCAAGCGTTACCAAGAACAATGATTTTGAACCGAGACCAAGTGCTACCAAATATGATGATTTTGAACTCAGGTCAAGCGTTACCGAGAATGATGATTTTGAACCGAGACCAAATATTAGCAAGTATGATGACTTTGAACTCAGGTCAAGCGTTACCGAGAATGATGATTTTGAATCGAGACCAAGTGTTACCAAATATGATGATTTAGAACTCAAATCAAGCATTACCAAAAACGATGATTTTGAACCGAGACCAAATATTAGCAAGTATGATGACTTTGCATCCAGGTCAAATACCAAGTACGATTCTGAACCTAAAGCAAGTGCTACCAAGTATAGTGATTAAATGAAAATCAAGTAATTGTATAATACAGTCGAAGAAAATCGTGCT…
Gma.4628.1.S1_at	BG156501	At2g45580	1e-101	Metabolism	Cytochrome P450	CYP76C	AAGCTCACGCCGTTCGGGAGCGGAAGACGAATTTGCCCTGGCTCCCCCCTCGCCGTTAGGATGCTGCACAACATGCTCGGTTCCTTGATCAACAACTTTGACTGGAAGCTTGAGAACAACATTGACCCCATCGACATGGACTTGGATCAGTCCCTCAGGGCTATCCCTGTTCTCGTAAATGCCAACTAATTCAACATCATCTGTATGTTGGCATGCCATCCCATGTACCTTTTTCTCAGAAACAGCAAACAGAAGCTTGATTCTTTGGTTTGAATGTTTCTCGTATGTGCTAGCTTTGATCCAGCTTGTTTCTTCCAGCCTGGGTTTAGGATAAATAAATAACCAGGCTTTGAGTAACATGATG
Gma.4589.2.S1_at	BI943736	At1g76490	1e-165	Metabolism			TGTTGTGTGTTATCCTCTTGTTTAAGGCTACTGCTTCAATAATGTGGTACTTTAGAGGGTAGTGTTTTTACGTGTTGTAATCTCCATCTTGTTGATTTGTAATTGTAGCAAGAGATGTCTCCAATTAGGATGTAGAGTTGTTAATAATAACAGTCTCTGGTTGCTCA
Gma.4425.1.S1_a_at	BQ297572	At5g01410	1e-139	Metabolism			AGCCATGGTTGGTATCAATTTGACCGATGACAAGGTTGAGAGGTTCGCCAATCGCTCTGAATGAA
Gma.4269.1.S1_at	CD407626	At1g27450	7e-82	Metabolism			CATAGATGATCTTATTGCCACTGGGGGAACGTTAGGTGCTGCAATTAAGCTTCTAGAACGTGTTGGGGTGCATGTTGTGGAGTGTGCTTGTGTGATTGAATTGCCAGAGTTAAAGGGGCGGGAAAGGTTGGGAGACAAGTCGCTATTTGTCTTGATTAATGGGGGAGCCTGATCTTTTTTCCAAGTGATTGTGTTTTTATTAGCTGGCTCTTGTTAGGAGCTTTATTGATGACTGCTTAGATTTCCTTAAGATANATTTTGATGCTGCGGAAACGGAAAGCGTGCTTTGTTTGAGCGCGCTCAGTTCTGCTCAATTATTATTATTATTATNNNCTTCTGTGAGTCCCGTTTGGTAATGACGATTGAGAGAACGATGNCTATAATATAGGACTTGCTTGC…
Gma.4279.1.S1_at	CA935007	At4g38690	1e-142	Metabolism	Phospholipid Biosynthesis		TTTGAATCACTTGAGCGAGCACCCTCCCGTTACGTCGCGCAAATACTTCTACAGGATCGAGAACACCGTTACCCCCGTCGCGGATAACCCCGTTCTCTGTGTTAAACCTGTTACCCGACGCATTCATGGCTACGCCAGGCTCTTCATCGCTCAATGCTTCGCCAAAGGATTCGCTGATAGGCTTCAGGTCTTCTCCACGGATTTCATTGACGAGGATTTCGTTGACGCATGCGCTGGACTCACTCATGCAAGGGTCGAAGGGAAAGCCTGAATGCCCGAATTCAACTATTAATATTGTTTGTTAGGGATGGATGTTTTGCTTTGTGTGTTCCTTTGATCTTTGATGGTGTCGTCACTGTACTTTTTTTATTTATTTGTTGTAAAGCTGTATAGATTTTA…
Gma.4182.1.S1_s_at	CF920322	At5g28050	2e-63	Metabolism			GATGGGGGTCCCTTTGGTGCTATTATAGTNNTGTAATGATGAAATNNGTTGCTNGATGTCACAACATGGTTCTGAGGAACACAGACCCNACTGCTCATGCAGAAGTCACTGTNATAAGAAAGGCTTGTGAAAAGNTAAACCAGATAGAACTTTCAGACTGTGAAATATATGCTTCTTGTGAACCTTGCCCNATGTGCTTTGGAGCAATNCACCTCTCACGAGTTAAGAGGTTGGTTTATGGAGCAAAGGCAGAGGCAGCAATTGCTATTGGNTTCGATGACTTCATTTCAGATGCATTGCGAGGNACTGGATTCTANCAGAANGNCACAATTGGAGATTAAAAGGGCTGATGGCAAAGNNGCNAACATTGCTGAAGAAGTTTTTGAGAGAACNAANGGA…
Gma.4230.1.S1_at	BE820796	At4g25050	2e-28	Metabolism	Fatty Acid Biosynthesis		ATTGCAGCCCAGAGGGCGTCGGTTTCAGCTTAGATGTGCGGCAAAACCAGAGACAGTGAAGAAGGTGTGTGACATAGTCAAGAAGCAATTGGCACTGCCAGATGAATCAGCTGTTACTGGAGAGTCTAAATTTGCTGCGCTTGGAGCTGATTCTCTTGACACGGTTGAGATTGTGATGGGACTTGAGGAGGAATTTGGTATTACCGTGGAAGAAGAAAGTGCCCAGAGTATCACCACCGTTCAAGACGCTGCTGATATGATCGATAAGCTTCTTGAAACCAAGGCTTAAACTAGTAAAAAGGACAAGCATGTCCATTTTAGAGTTTTTTGCTATGTCGACGGAAGGGGTTTTTAATCTTTATCTTTGGTATTACAACTTGATTGTCTAAGTAACTGCTA…
Gma.4125.1.S1_at	BM567768	At3g58580	1e-122	Metabolism			TTTAGCAGTTGACCCGCTTAACATTCTACGTCCTCACAGCAAGTTGGTTCATCAGTTACCACTGGTNAGTGCATACNCATCTTTTGCNAGAACAGTTGGCCTTGGATATGAGCAGCATAAAAGGAGANTGGATGGTGGAACNAATGAACCTTTATTCACAAATGTCACTAGAGATTTTATTGGCACTCTAGATTACATATTTTACACAGCGGATTCATTGGTTGTGGAGTCATTATTGGAGTTNCTGGATGAGGAGAGTTTGAGGAAGGACACAGCACTTCCTTCACCTGAATGGTCCTCAGATCACATNGCTCTCTTAGCNGANTTTCGCTGCTGCAAGAATAAATCTAGGCGTTGACAGTTAAGGTCACTTTCAGTGATACATAANNAAAAANNNNN…
Gma.4206.1.S1_s_at	AF195798.1	At4g15350	2e-74	Metabolism	Cytochrome P450	CYP705A	CGTCCCGAGAGGTTCTTAGAAACTGGTGCTGAAGGGGAAGCAGGGCCTCTTGATCTTAGGGGCCAGCATTTCCAACTCCTCCCATTTGGGTCTGGGAGGAGAATGTGCCCTGGTGTCAATTTGGCTACTTCAGGAATGGCAACACTTCTTGCATCTCTTATCCAATGCTTTGACCTGCAAGTGCTGGGCCCTCAAGGACAAATATTGAAAGGTGATGATGCCAAAGTTAGCATGGAAGAGAGAGCTGGCCTCACAGTTCCAAGGGCACATAGTCTCGTTTGTGTTCCACTTGCAAGGATCGGCGTTGCATCTAAACTCCTTTCTTAATTAAGATAATCATCATATACAATAGTAGTGTCTTGCCATCGCAGTTGCTTTTTATGTATTCATAATCATCAT…
Gma.4374.1.S1_a_at	BM178538	At2g45550	1e-53	Metabolism	Cytochrome P450	CYP76C	CATGACTATGAGCTATTGCCATTTGGTGCTGGGAGA
Gma.4374.1.S1_s_at	BM178538	At2g45550	1e-53	Metabolism	Cytochrome P450	CYP76C	GGCCAATTTGTTGCATGGATTTAACTGGAGATTGCCTGATAATGTGAGGAAGGAGGATTTGAATATGGATGAGATTTTTGGGCTCTCTACACCTAAGAAACTACCACTGGAAACTGTTGTGGAGCCNTAGGCTTCCATACCATCTTTATTCTCTCTGAGCAGTGCCTTTGCACAAAGCGTTTCTCTCTAATAAGATTGTTGTAGGGATAATGGGTCTTGAGTGAGCTTATGTTTGTCACACTGGATTGCAAT
Gma.4374.1.S1_x_at	BM178538	At2g45550	1e-53	Metabolism	Cytochrome P450	CYP76C	CATGACTATGAGCTATTGCCATTTGGTGCTGGGAGAAGGATGTGCCCTGGGTACCCTCTTGGCCTTAAGGTCATTCAAGCAAGTTTGGCCAATTTGTTGCATGGATTTAACTGGAGATTGCCTGATAATGTGAGGAAGGAGGATTTGAATATGGATGAGATTTTTGGGCTCTCTACACCTAAGAAACTACCACTGGAAACTGTTGTGGAGCCNTAGGCTTCCATACCATCTTTATTCTCTCTGAGCAGTGCCTTTGCACAAAGCGTTTCTCTCTAATAAGATTGTTGTAGGGATAATGGGTCTTGAGTGAGCTTATGTTTGTCACACTGGATTGCAATAAATTTTTCTCTCTTTTCATAACAATGTTAGAAAGAGAGAAAAAAAAAANGATGTTGTGGT…
Gma.4375.1.S1_s_at	AF363021.1	At5g37600	3e-40	Metabolism			ACGAAACCGCTGACATCAACACCTTCTTATGGGGAGTTGCAAACCGTGGAGCTTCAGTTAGGGTTGGGAGGGACACAGAGAAAGTAGGGAAGGGATATTTTGAGGACAGAAGGCCAGCTTCTAACATGGACCCATATTTGGTTACTTCCATGATTGCAGACACAACCATTCTGTGGAAGCCATGAGCAAAA
Gma.4375.2.S1_at	BQ080891	At5g37600	2e-95	Metabolism			GATCAAAACCGCCATTGAGAAGTTGGGGAAGAGACACAAGGAGCACATTGCTGCTTATGGAGAAGGCAACGAGCGTCGTTTGACAGGGCGCCACGAAACCGCTGACATCAACACCTTCTTATGGGGAGTTGCAAACCGTGGAGCTTCAGTTAGGGTTGGGAGGGACACAGAGAAAGCAGGGAAGGGATATTTTGAGGACAGAAGGCCAGCTTCTAACATGGACCCATATGTGGTTACTTCCATGATTGCAGACACAACCATTCTGTGGAAGCCATGAGCAAAACTTGCATGTTGTCTCCCTTTGGATGGAACAAGGAACAAGGAACAAGGAACAAGGAACAGTTATGCTTTTCTAAGTAGGGTTTGGTCCTTTTTATTTTTTACCTTTTGATTTTTCTA…
Gma.4333.1.S1_at	BI967236	At5g53460	5e-63	Metabolism			AATGTTGCCGGGAGTCCAGACGAACTTATCAAGAAGAAGCAGCAACCAAGGGACACTGTGGCAGTGGCAAACAAACAGTGATTACTTAGGAGCCTTCTGTGGTTTTTCTATTCTTAAAAGATGGAATAATAAAAGATGACTGCTGGAGATTCATTGAGCATTGTTGGTTCGTAGTTGGTGCCCCATATAAATGTAAGGGGGAAAATAATAAAGAAGCGATCTAAGGGTGCAAGGTTAGTGCACAGTAGAAAATTAGGAATGTTCATAGGCTTCGTGATGGAAAGGT
Gma.4351.1.S1_at	BE023594	At1g49670	1e-144	Metabolism			GAACACCTTTCATATCATGAACAATTGTATATTTTGACTCTCGGTGAAAA
Gma.3881.1.S1_at	X92437.1	At2g30490	0	Metabolism	Cytochrome P450	CYP73A	CGACGCAAAGCTTGGGGGCTATGATATCCCAGCTGAGAGCAAGATCTTGGTGAATGCATGGTGGCTGGCCAACAACCCTGCACACTGGAAGAAGCCAGAGGAGTTCCGGCCTGAGAGGTTCTTCGAGGAGGAGTCGCTTGTTGAAGCCAATGGCAATGACTTTAGGTACCTTCCCTTTGGTGTTGGCAGAAGAAGCTGCCCTGGAATCATTCTTGCA
Gma.3881.1.S1_s_at	X92437.1	At2g30490	0	Metabolism	Cytochrome P450	CYP73A	TTAGACTCCACCACATGATCATGATCATATGATCAATCCCCTTAATTTTTTCTTTTTTCTTTTCCCTTTTCTTTACTCTGTATTGTATCAATGCTTGAAAATGGGGTTGTTCCAAAAATGTCATATATATTTGGCCTGCTAATGGGTATTGTAAATCTCTGAACTTGAAGTGATGCACGGTTTTGAGATGGTTTTCTAAT
Gma.3881.2.S1_at	AW349366	At2g30490	6e-82	Metabolism	Cytochrome P450	CYP73A	TGCGAAGCTTGGTGGCTATGACATCCCAGCAGAGAGCAAGATATTGGTGAATGCATGGTGGCTGGCCAACAACCCTGCACACTGGAAGAAGCCAGAGGAGTTCCGGCCAGAGAGGTTCTTGGAGGAGGAATTGCATGTGGAAGCCAATGGCAATGACTTTAGGTACCTTCCCTTTGGGGTTGGCAGAAGGAGTTGCCCCGGAATCATTCTTGCA
Gma.3956.1.S1_x_at	BE659401	At3g43190	0	Metabolism	Sucrose Biosynthesis		GGCAAATTTACTCGGACAGGCTCTTGACACTCACTGGTGTGTATGGCTTCTGGAAGCACGTGACCAATCTTGAACGCCGTGAGAGCAAACGTTACCTCGAGATGTTCTATGCTCTCAAGTACCGCAAATTGGCTGAGTCTGTGCCCCTTGCTATTGAAGAGTAAATTCATGTTTGAAGAGAACATCAATGGAGAAACCGGCTTTTGGTCGTTTGAAGTCTTATGGAGCTTTCATAAATAACGCCATTGATTTTGATTGTGATCAGCTTTTGGATTTAAAGAGTCTAAAAAAAAGTGTCGTTTGTTTTTATATTTTGCTTAGGTTTTGGGTAAAAAAAGTAAAAAAAGAAAGTCTTTTTTTTTTNNNNAAATTCTTTTTGTTGTTGCAATATTGTGTATG…
Gma.4030.1.S1_at	CD414923	At3g14680	6e-92	Metabolism	Cytochrome P450	CYP72A	AATTTATTTTGCTCGAGCGATCAAGAATGATGTGAAACTTGGAAACCTTTCCCTACCTGCGGGAGTGCAAGTTTCCTTACCAATACTATTGATTCACCAGGATCGTGATATTTGGGGTGATGATGCTACAGAGTTCAACCCAGAAAGATTTGCTGAAGGAGTAGCAAAGGCAACAAAAGGCCAAGTTGTGTTTTTCCCATTTGGATGGGGTCCTAGAGTGTGCTTAGGCCAAAATTTTGCTTTATTAGAAGCGAAGTTGGTTTTGTCATTACTCTTACAACGCTTCTCATTTGAGCTTTCTCCTACCTATGCACATGCTCCAGTCACTGTGCTCACTCTTAATCCAAAATTTGGTGCTCATATCATCTTACA
Gma.4096.1.S1_at	BG508949	At4g14880	1e-121	Metabolism			GAAAGTCCAATACTGTCTGGAGGAAAACCTGGCCCTCATAAGATCCAAGGAATTGGTGCTGGCTTCATCCCTGGTGTTCTGGATGTCGATTTACTTGATGAAGTTGTTCAAATTTCAAGTGAAGAAGCCATTGAAACTGCTAAACTTCTTGCTTTGAAAGAAGGTTTGCTGGTGGGAATATCATCTGGTGCAGCTGCAGCTGCTGCAATTAAGATAGCAAAGAGGCCAGAAAATGCTGGAAAACTCATTATTGCGGTCTTCCCAAGCTTTGGAGAGCGTTATTTATCATCTGTGCTCTTTGAATCCGTGAAGCGAGAAGCAGAGAGCATGGTCTTCGAGCCTTGAATA
Gma.4097.1.S1_at	AW350249	At1g77120	1e-179	Metabolism			GATTAACAAGGCTTTTGATTACATGCTGAAAGGGGAGTCCATCAGATGCATCATTCG
Gma.3572.1.S1_at	AW310006	At5g14800	1e-106	Metabolism	Amino Acid Biosynthesis/Metabolism		AACTGGCCTGAGTGGCAGTGGTCCTGCTTATGTTTATTTAGCAATAGAGGCTTTGGCTGATGGAGGAGTAGCAGCTGGTTTACCACGTGATCTTTCATTAAGTCTAGCTTCTCAAACTGTATTAGGGGCAGCATCAATGGTCTCCCAGACTGGGAAGCACCCGGGACAGCTCAAAGATGACGTTACTTCTCCAGGTGGGACAACAATTACGGGCATTCATGAGTTAGAAAATGGTGGGTTCCGTGGAACACTGATGAATGCTGTTGTTGCTGCTGCTAAGCGCAGCCGAGAGCTTTCCTGAATCAAGAGATTAGGATTCTACTTTTTTTTTAGACCAAAATCTGATTTCGGTCGAATTTTCAGTCACTATTATGAGAACTTGGGGCTCTTCTTTGAGAG…
Gma.358.1.S1_at	AW310270	At3g48690	1e-65	Metabolism			AATTGGATCGGAACCTGTTGCAGGGCACCAACAGAGCGTGCCCTATTTGGTATGGGATTTTGTTTATCCATCTGCGCCTGGAGGGATTGACAACCCTATGATCAATCCAATGGTTACTGGGGCGCCTAGCTTGGCTGGACTTGGGTGTTCTAAGATTCTGGTTTGCGTTGCTGAAAAGGATCTGATAAAGGATAGAGGGGTTGCGTACTATGAGGCTGTGAAGAAGAGTGGCTGGCAAGGTGAAGCGGAACTGTTCGAAGTGGAGGGCGAGGATCATGCTTTCCACATCCACAATCCACAAACCCAGAATGCCATGAAAATGATCAAACGCCTCTCGGATTTTCTCCTCCACTAAAACACATACCCTGAGGATTCTGAGTTTTAATGTCTCATGGATGT…
Gma.3643.1.S1_at	CA936445	At1g43710	0	Metabolism			AATGCTCTTGCCAGGGATGTGGAATACCTTGCTTCTAGGGATGCCACNATCATGGGTAGTCGGAATGGCCATGCTCCCATATTCCTNTGGTATACCTTGAATCGGAAAGGATATAGAGGTTTTCAGAAAGAAGTACAGAAATGCTTGCGAAATGCNCACTACTTCAAAGGCCGCCTTGTTGAGGCTGGGATTGGTGCAATGCTTAATGAACTGAGCAGCACGGTTGTGTTTGAGAGGCCACATGATGAGGAATTTATACGCAAGTGGCAGTTAGCATGCAAGGGGAATATCGCACATGTGGTGGTGATGCCAAACATCACTATTGAGAAGCTTGATGATTTTCTGAACGAGCTTCTGGAGAAGCGTGCTACCTGGTTTCAAGATGGCAAGGATCAACCC…
Gma.3717.1.S1_a_at	AW350536	At1g01710	1e-160	Metabolism			GTGCTGTGAGTCTGGACCACTCCATGTGGTTTCACAGACCTTTACGAGCTGATGACTGGATACTATTTGTGATCTTTAGTCCTACTGCCAATAATGCACGTGGCTATGTCACTGGCCAAATGTTCAATCAGAAGGGAGAGCTACTTGTATCAGTGGTTCAAGAAGGTGTAATGAGGGAAGTTATTTCTGC
Gma.3362.1.S1_at	BQ454262	At1g08490	2e-92	Metabolism			GGTGGAGCTCGGTAGATATCTGTATGAGAGGCTNCTTTCAGTCCCAAATATTCGCATCTATGGGCCAGCACCTTCAGAAAAAGTCGAACGAGCTGCCCTTTGCTCTTTCAATGTTGAGAATTTGCACCCTACTGATCTTGCAACACTTCTGGATCAACAGCATGGAGTGGCTATCAGATCAGGTCACCACTGTGCCCAACCCCTCCATCGCTATTTAGGTGTCAGCTCAAGTGCACGGGCTAGTCTCTATTTCTATAACACAAAGGAGGATGTAGACAACTTTATCCATGCCCTCAATGACACAGTCAGCTTTTTCAATTCATTGATGTAACTGAAATGTATTTTTATGTATATTATATTTTGTTTATACACGAATGAGAGGGTTGGCTTAGTTGGTAG…
Gma.3508.1.S1_s_at	BI968765	At3g13750	0	Metabolism			ATCATGCATTGCCTGGCCAAAAACAAAGATTTATATAAGAGAATTTGGATGCGCAAAGACTGTGTATACTGTACATAGTCAAGTCAGGCTATTGTGCTGAATATTGCCCCATGTATTACAGGGCTTGTATCAATGAAGATTGAGCCCTTACACATTTATTTAATTTACTATGATACAATGGAAAGAATTGTAGACACGCAAAATGTGTCGGAGAGTATATTTGCTATATTCTGCCAGAAATAATTGTGTTTTCCCATTATAATTATT
Gma.3518.1.S1_at	AF301590.1	At5g37600	0	Metabolism			TCAAAGCAGCAATTGACAAGTTGGGGAAGAAGCACAAGGAGCACATTGCTGCTTATGGAGAAGGCAACGAACGTCGTTTGACAGGACGCCACGAAACCGCTGACATCAACACCTTCTTATGGGGAGTTGCAAACCGTGGAGCTTCTGTTAGGGTTGGGAGAGACACAGAGAAAGCAGGGAAGGGATATTTTGAGGACAGAAGGCCAGCTTCCAACATGGACCCATACGTGGTTACTTCCATGATTGCAGACACAACCATTCTGTGGAAGCCATGAGCAAAACCTGCATGTTTTCTCCCTTTGGATGGAAAGGAACAGTTATGCTTTTCTTAGTAGGATTTGGTCTCTCTCTCTTTTTACCTTTTGATTGGTACTATGGTT
Gma.3557.2.S1_s_at	BI974043	At1g59960	2e-20	Metabolism			ACCACCTTAGTCTCTGAAGTCACTCTCCCCTCCTCCTCCGGCCAGCGGAAGATGCCGCTGATGGGCCTCGGCACCGCGCCGGAAGCAACCAGCGCGGTTACCACAAAAGATGCTGTTCTTGAGGCCATCAAGCAGGGCTACAGGCACTTTGATGCTGCTTCTGCTTATGGTGTGGAACAGTCTGTGGGAGAAGCCATAGCTGAAGCACTTAAGCAAGGACTAATTGCATCCAGAGATCAACTCTTCATCACTACCAAATTGTGGGTCACTGATAACCATGCCCATACTA
Gma.2854.2.S1_a_at	D86930.1	At2g26230	1e-118	Metabolism			AGCACTTCCTGATACCCGTGAAAGGATGGTAGCAACAGAAGTAACCGCACTGTGGAGGTATTCGTATGAATCGCTGTATAGCCTCCCTCAGAAGCCGCTTTACTTTACAGAAAAGTATCAGGAAGTGAAAAAAGTTCTGGCTGACACTTTTTTTGGCCCACCAAAAGGGGGAGTCTATAGCCCATCTGTTCAAAACACACTCTACCTGATGGCAAAGGCCACACTGAACAGNTTTCCTGACATAGCTTATGTCAGTCTAAAGTTGCCAAATCTTCATTTCATACCTGTCAATATCTCAAACCAGGATGGCCCTATTGTGAAGTTTGAGGATGATGTGTACTTGCCAACGGATGAGCCACATGGGTCAATTCAAGCTAGTTTGAGCCGCCTTTGGTCAAA…
Gma.2876.1.S1_s_at	CD396422	At5g43330	1e-167	Metabolism			GCCTAAATTAGACACCATTGCTTTTTGTCTACTGTCCTTGTTAGTAGGTTCCCATGTTTTGCCTATAGAAGTGTAGCTTCAATTTTGAATAATGCTCCTTCTAAGATACAAAGGAACTATCACTGGAGAAGAGTCTGTTTTTCATTGGAATTACTTGTATTTCAACATCTAATCCTTTTAGGAGGAGGATATTTGAGCCCATGGGCCGCATATTGAATTTTGGATTAGTCCTAATTTTATGTGCGTTAGTGCCCCCGGTTGAANNNNNNNNNGTGTTTGTGGTGGNTGTACAAGATTTTTGATGTATGTGGGATGCACAAAGCGTGCAAACATATACTTCTAGGCCTTGTGGTCGAGTATTATG
Gma.2891.1.S1_at	BI971321	At1g23820	1e-140	Metabolism			TGTCGCCAAATATTCAAAGGTTCTGTCAACTATGCATGGACCACAGTTCCTACATATCCTAGTGGGATGATTGGTTTTATGCTTTGCTCAACTGAGGGTCCTCTTGTTGATTTCAAGCATCCAGTGAATCCTTTAAGTGAGAATGATAGTCAACAGTCAAGACCATTGAAATTTTACAATTCTGAGATTCATACAGCGGCTTTCTGTTTGCCATCTTTTGCTAAGAGGAAGATTGGTTCTAAAACAAATTGAAAATATTTTTCCTGGGATTGAAGGAGCAAATGTGGCTGTAGGCATTCATCCTTTCACTGGATTGGTCCATCCATCAATGAACCTTGGAATAAGTTAATATCTTCAAGATGACATTGAAGAGCAACTTTACTTCTATTTCATGAAATG…
Gma.2971.1.S1_s_at	CD409358	At4g22220	1e-62	Metabolism	Nitrogen Metabolism		GCAAATGGAGGAAGTTCTGACTATAAAAAATACTGAAATTGCAAAGCATCTTTCACTTCCACCAGTTAAGCTCCACTGCAGCATGCTTGCTGAAGATGCNATCAAAGCNGCCGTTAAAGACTATGAAGCTAAGCGTGCTAAGGCAACTGCTAGCGGAGAGGCAGCAACAGNAGAGAAGCCTGCCANTGCATGATTTCTTTCATNTATANAAAGAATGATGANNNAAACAACCNTTTGTTTGTTTGTNNNTTATTCTNNTAATCAGTTNCTNATNGAAGANCACCTTCACTNGANNNTNNGTTGGACTTAGTTATAGCTAGAGAGTATTCACATCATGCGAAGTAAATATTTGAAATGCCGGCTATGGTTTGTTATCTGCTACTGGGTTTGTAT
Gma.3032.1.S1_s_at	CD397802	At4g02280	7e-66	Metabolism	Sucrose Biosynthesis		AATACGTTTCCAAATTAGAGAGGCGTGAAACTCGACGATATCTTGAGATGTTCTATATCCTCAAGTTCCGTGATTTGGCAAATTCTGTTCCGCTTGCAAAGGATGATGCAAGTTAAGTAGCTATATATATATAATTTCACCAAGGCTTGACAGCAGACATAATAAGAGTCATATATGTAAATATAAAAGTCTGCTTCTCGTGTTTTGAAATCTTGTGATGCGACCTAGAGGAGTTTCATGGAAGACTTGTCTATGTTAACTTCGATTATGTATATGCAAGAGATGGCGAGCAATTGTTGTTGAATTTGGATGTCTCTTGTTTTCGTTTGATTAGCAGTTATCAAAGATCTAGACCTGGGAATTACCTGTGAGGATTGTTATCCTTACTGATGGGTA
Gma.3082.2.S1_a_at	CD404827	At2g42910	4e-49	Metabolism			TCTGGTCATCATGTAGTCATTGTTGATGATTTGGTCCAATCTGGAGGCACCCTGATTGAGTGTCAGAAAGTTTTGGCAGCCAATGGTGCAGCAAAGGTGAGTGCCTATGTTACCCATGGCGTGTTTCCTAACCAATCATGGGAGCGATTCACTCATAAAAAAGACGCCTTGGAGAATGCATTTGCCTACTTCTGGATTACAGATTCTTGCCCTCTTACTGTCAAAGCTGTAGCAAATACAGCTCCTTTTGAAGTGCTGAGTCTAGCCGGGTCTATTGCTAATGC
Gma.3133.1.S1_at	AJ272035.1	At5g27380	1e-147	Metabolism			GATGAGTTGAGGGAAACCCTCCTTAAANTTACAGGAAGCAGGTTCTGAAGAAGATGCAGNCATACATCCTTATGCAGAGGATATTTCCNGCCACTTCTCCAGCAATTTTGGTGCGTGATGGTAATTGGGATANGGGTCATGTCATTTCAGAAGCTGGANTATTTGGTACTTATTTAAGGAATAAGGANAAGNTTATCATTAATAACGAAAGTGGCTATATGGTGCGTACAAAAATATCATCATCTTATGAAGGNGGAGTTTTGCCTGGTTTTGGAGTGGTAGATACTGTATACCTAACTTGATGGAGCTAACCCCCCAAGTTATCAAAGCAATTCAAAACATTATGTATGGTTTATATATCACCACTCAAGTCTCCTCACTCCTGATTTTCTTTGTATG…
Gma.3168.1.S1_at	CA819733	At5g54500	7e-92	Metabolism			TGAAAGGTGGAAGTCCATATGGTGCNGGAACTTANGCCGGTGANGGCTCAAGACAGCCAAGTGAGCTNGAGTTACANCAAGCATTCCACCAAGGNAAGTACATTGCNGGCATCACAAAGAAGCTCAAGCAAGCTGCATAATGTTNGCCTTNCNTNNATATNAGATNATACTATTATTATTAAACCATACCACAATATTGCTTGAAAATCATTNNCNANTTTTTAGNCTTGAAATATATTGAGTTTTNTTTTNCTGNGCTTGCAAGTATTTTTTTTTTNCTTTNCTAATCTTNGTNAAGGAAATGCTTTGTANGAGTGTTACATGTTGCAGTGGATGTTGCAATTTGTTGAATGAGGAAAGTTTGTGNNTNTNGTCCTTTNGTGTTANGCNGAAACANTA…
Gma.3190.1.S1_at	CD396812	At1g65290	1e-42	Metabolism	Fatty Acid Biosynthesis		CAGAATGACCTTGGATTGGATAGTTTAGATTCNGTAGAGATNGTGATGGCTCTTGAGGANGAGTTTGGGTTCGAGATTCCTGATAATGAGGCAGACAAGATCAACTCCATTAAACTTGCAGTGGACTTCATTGCATCTCATCCTCAGGCAAAGTAGTGGAATTCNNNNNNNNNNNNNNTTTTGTTTCTCAACATCTAGTTTAGATGANNCATCNGACATTTTTGCTTCCANAGTGGAACTTTGTTTTCTCATCCCTCAGAAGNGTGTTAGCTGGGGATGTGCCAGCTTCATTTGGCGGTATTGGCATCCAGAACTTCACATTCTGTGTTCCTCCTATATTCGTGTCAATAAGAATTGTGTTAAATTTCCGATTATGAAATTGTGAGGTCTTGAGTTGTC…
Gma.2354.2.S1_at	CA819143	At1g74040	0	Metabolism			GTTGTTTCCAGTGTCAAGGCCTATATTGCTGCACTAAACAAGATGTNGGGTTTCAAGGAANCNTCTCNATCTGCTGAAAAAATTNCANTTTCTTCATTGAAGATTTGAGAATTNTGTGNTGCTNCTTTGGTAACANTTGTTTGTGTTNAACCACNAAGAGGAAGACAANGTTGCAGCAGCATTCTTGGCTCTCGCAGGTCTCCATATTTAAGGTGTCGTCCCTGTGTTTTGACCGGAATGTATTTGCAGTCAGGAATTTATTGATTCACCCAAGTAGCCTTAGCAAAGAATGTAACGTAAGTCCATTTTGAATATTCAGACTACAGGGATTCTTTCCCTTTTNATTTTATAGGGTGCCCTTTATTTGAAATTATNAAATGTCCTTNAAGATTAGAGTGT…
Gma.2451.1.S1_at	AW100972	At1g78680	1e-122	Metabolism			GTTTATGTTTCCACTGTACGTTCTCNAAACTATCCTGTGACTGGCTTCCAATGGCATCCAGAGAAAAATGCCTTTGAATGGGGTTCACCAAGAATTCCACACACGGAGGATGCCATTCAGATAACCCAGTATGTTGCAAATTTTTTGGTCAGTGAAGCTAGGAAATCCTTAAACAGACCAGTTGCTCAAGAGTTGCTAGACAATCTCATTTACAATTACAGTCCAACTTATTGNGGGAAGGCTGGGAAAGGATATGATGAAGTTTATATATTTGCGCAAGCCTGAGAATGCTGGAGAAATCAGCCAAGAATTGTATTGTGCATAGTAATTACCATGAATGTTGTTGTATGCACTAGTAATATCATTGTTATGATGCACAATAATGAGAGCAAGATGCTT…
Gma.2387.2.A1_at	AW309516	At2g44160	2e-11	Metabolism			TGGTCAAGAGGATGCATCACCCTCAGGGTACAAGCTACTTCTTGGTGAGTTTGGTCGACAATGATTACATCAATGGTGATCTTTTCACCGTCTTTGCAGATTTCTGACATGAGCTTATTATTTATTAGTTCTTTAGTTATGTCACTTCTGTTCGTTGTCATGTTCCTTTCCTTTCTTTTGTTTTCTTCTCAGTAGGATGGTTCATATTACACGTGGTTCTAAGTTGAAGTACCAAATTATTTTTCTGGGCTTTGTCCCAAACATCTTTATTTTTTCATTCTTCTGAGTCGCATGAGTAACCTGT
Gma.2434.2.S1_at	AW310370	At5g16450	2e-36	Metabolism			GATTTCAATTCATGCAAGGACTATATTTATGGGCAGCACAGGATCTAGTGTAGTGCTTTCGGTACTTGTGTTCTTGACCCGGTTCCTCGCTTCCACAAAATTATAACCGATAGAATCCCCTTGATAATCAAAGTAGGTTGGAGTGTTTGTCCATTTCATACCAACATTATCTCTGTTTTGAATTACTGTCACGAAAGCTTGTTTTTCCCCCATATATTAAGTTAATGGTTGTCTGTTATTAAGTTTGGAGAGATATAAGTCATAAGTGCAAAGTATACACATCCATATTTTGACCAGATGATCTTATTGTAGTTGCATAAGATGTTGCGGTCTAGA
Gma.2439.1.S1_at	BI972053	At1g03210	7e-41	Metabolism			GAATAAGATGGTCAGGTCAGTGCTTTAGTTTGCAGGCCCNGCGTNTGGTNTCATCAGTTCAAATCAATGCCAAAT
Gma.254.1.S1_at	AF404403.1	At4g16760	0	Metabolism			GAAGTTCTTTGCAGCATTTATGCTTTGTTTCTACTTCATAANCATCTGGGTGATTTTCTTTCCACTGGCTGCATTAACCCAAAACAAGGATCACTTGCNAGTGAGCAGCTGAGAAACTTNTATTCACAGGTNCGTCCTAATGCAATTGCGCTTGTTGATGCATTTAACTACACTGATCACTACCTTGGTTCAATTCTTGGACGTTACGATGGAAATGTGTATCCGAAGTTGTACGAGGAGGCATGGAAGGATCCTTTGAATGATTCAGTTGTTCCTGATGGCTTTAAAGAGTATATTCAACCGATGCTTAAGCAGCAACTACGTAATGCTAGGCTGTAGTTNATTTTGTGGCAATGATGCTTTTGGCATCTAAGAAATTTACCCAGACTATTCTGATTT…
Gma.2750.1.S1_at	AW349237	At4g33510	0	Metabolism	Amino Acid Biosynthesis/Metabolism		TCTGGACTTAAAACCCGCTCTTTTGATGCAATAAGGGCTGAGCTGAGGGCATTCTTTGATGTGCATGATCAAGAAGGAAGCTACCCAGGAGGGGTTCATTTAGAGATGACAGGGCAGAACGTGACAGAATGTGTTGGAGGCTCAAGGACTATTACTTATGATGACTTGAGCTCACGCTACCACACACATTGTGATCCAAGGCTTAATGCTTCTCAATCTCTCGAGCTTGCATTTAATATTGCGGACAGGTTGCGCAAGAGAAGGCTCAATTCAACTCGATCACTTGGAATTTAGACAAGAGGGGGTCTGTCTTCCTTTGTACCTGGATCACAATACTGGTCAAACATGTGTTGAGTTTTCTTGAGCACAGTGAACAAATACTCTACTGGGAGCCACTCT…
Gma.2635.1.A1_at	BE659549	At1g08250	8e-57	Metabolism			TCCTTTCAAGACGAGCATTGTTTTCGCACACGACAAAGGAACTTCGGTGCTTTTCAAAGTGCTTTC
Gma.2635.1.A1_s_at	BE659549	At1g08250	8e-57	Metabolism			GAACCGTCCGATTAGGCTGGTGGATGACGCGAACGTTGGAACCGCGAAGCACTTTGAGTACTTGTTCTACGTTGATTTTGAGGCTTCCATGGCTGAGGTTAGGGCACAGAACGCGTTGGCAGAGGTGCAGGAATTCACGTCTTTCTTGCGAGTGTTAGGGAGTTACCCTATGGACATGACACCCTGGACACCTT
Gma.2139.1.S1_s_at	CF922475	At1g31812	2e-12	Metabolism			ATCCAACAAGCAGATCAATCTCTCTCTCTGTCTCCCAATCAAAACAGACATGGGTTTGAAGGAGGATTTTGAGCAGTATGCTGAGAAAGCAAAGACTTTGCCACCGACTCAATCAAACGAAGACTTGCTTATCCTTTATGGATTGTACAANCAGGCCACCGTTGGACCTGTCAACACCAGCCGTCNNGGNANTGTTCAACATGAGGGACAGAGCTAAATGGGATGCATGGAAGGCTGTTGAAGGGAAATCCAAGGACGAAGCAATGNGTGATTACATCANTAAGGTGAAACAGCTGCTGGAAGCAGNCNGGCNTGCCTGCTTGATAACATTGTCATGCCTTGCTTTCTNATTCTGTGCTAGNANGTTCNCAACAGTTTGGAAATAAACAATTGCAGTGT…
Gma.2139.2.S1_s_at	AW350419	At3g59480	1e-156	Metabolism	Sucrose Biosynthesis		GTCATTGTGGCACCCCAATTTGAAGTTGCTCCTTGTCACTCTTGGGGAACATGGTTCCAGATACTACACCAAGAGTTTCAAAGGATCGGTAGATGCTTTCCATGTCAATACAGTTGATACAACTGGTGCCGGTGATTCCTTTGTTGGTGCTTTATTGGCCAAGATTGTCGATGATCAGTCCATACTTGAAGATGAACCAAGGTTAAGAGAAGTACTAAAGTTTGCAAATGCATGTGGAGCTATTACAACTACCCAAAAGGGAGCAATTCCGGCCCTTCCCAAAGAGGAGGCTGCACTGAAACTGATCAAAGGGGGGTCATAGAATCTTTTGGCAAAATGCAAAAGTGCTAGCATGATTTCGTTTTCTTCCCCTAATGTTTAAATTTTCCGTTGGATTTG…
Gma.2141.1.S1_at	CD406772	At2g36790	3e-28	Metabolism			ACGTGGCCTCTGTTTGCGGAGCATTTTTTCAACGAGAAGCTGGTGGTGGATGTGTTGAAGATTGGGGTGCCGGTGGGGGCGAAAGAGTGGAGGAACTGGAACGAGTTTGGGAGTGAGGTGGTGAAACGGGAGGAGATTGGAAACGCGATTGCTTCGTTGATGAGTGAGGAAGAAGAAGATGGAGGAATGAGGAAGAGAGCCAAGGAGCTAAGCGTTGCGGCGAAGAGTGCTATAAAGGTTGGTGGATCTTCGCACAACAACATGAAGGAATTGATTCGGGAGCTCAAGGAGATCAAGCTTTCCAAGGAGGCTCAAGAGACCGCACCCAATCCTTAAGACTGGTTCTGCTTTTCCATCTTTTGAACAAG
Gma.2144.1.S1_a_at	BE821591	At4g11010	2e-93	Metabolism	Nucleotide Biosynthesis/Metabolism		TATCACGACCTGAAAGAAAGACCCTTCTTCGATGGGCTGTGTGATTTCCTTAGCTCTGGCCCTGTTATTGCAATGGTGTGGGAAGGACAGGGAGTTATTTCCTATGGCCGAAAGCTAATTGGAGCCACAGATCCTCAGAAATCAGAACCTGGAACCATTAGGGGTGATCTTGCTGTTGTTGTTGGAAGAAATATCATTCATGGGAGTGATGGTCCTGAGACTGCCAAGGATGAGATTAAGTTGTGGTTTAAGCCAGAGGAGTTGGTTAGTTTCACTAGCAATGCAGAAAAGTGGGTTTATGGTGTCAACTGATTCTTTCCCTCATGCCTTGGGTTTTCTATAACAACTGCTCAGTG
Gma.2105.1.S1_at	BI424905	At5g37600	1e-162	Metabolism			AGAAGGCCATTGAAAAGCTTGGATTGAGGCACAAGGAGCACATNGCAGCATATGGAGAAGGCAACGAGAGACGTCTCACNGGAAGACATGAAACTGCAGACATCAACACCTTCTCTTGGGGTGTGGCAAACCGTGGAAGCTCCATTAGAGTTGGAAGAGACACAGAGAAAAATGGCAAAGGTTACTTNGAGGACAGAAGGCCTGCTTCTAATATGGATCCNTATGTAGTCACCTCCATGATCGCAGAGACTACCATCCTCTGGAAACCATGAAAANACAGTCATATNGTCTCTAGATTTGGACCACTNAAAATTGTGTNNNNNATAGTCATTTGATCTAAAANTTTATATTTGCAAGGTGNTGTTTAGTTAGGAATTTCTAAGTGGTCTTTTTGAGCCT…
Gma.2069.1.S1_at	CD414638	At2g38670	1e-134	Metabolism			TGCTCGAAAGCCCAAAAGATATTACTACTGCCACAGTAGCCCAAAGGATAATGGCTAATCATGAAGCTTATGTGAAACGCAATGCTAAGAAAACTAGGAGTGAGCAGAGATACTANGAAGAGAAAAAATACGTCTCTGGAGACTAGAGTGTATATAATGATCTTTTACATTAGTTNGGTACTGCTCTTCAAGNTTGACCCTGTCACAGAGATGCNACCNNTATAGTATNNNNNGAATCTANACACNCTTTGTGAAGGACATNTNGTNCAGGGTATGTATAACATAGGAGTGGNNATAACTCNGGAATACCGATGTACTTTAATGTCCTGANGTTTTANTTNTGTNNTCTGAAAGGCAACCATGTGGTTTGCTCACCAGTTTTATGCCATTTGGTTTTTG…
Gma.2075.1.S1_at	BI969313	At2g35120	1e-67	Metabolism			TGATGAAAATTCTGCAACCGTCGGCATAACTGATCATGCCCAAGATCATTTAGGTGATGTTGTATATGTTGAATTGCCAGAAGTGGGAGCAGCTGTAACACAAGGAGGTAGTTTTGGTGCAGTTGAAAGTGTGAAGGCAACTAGTGACATTAACTCTCCTGTTTCAGGAAAAGTTGTTGAAGTTAATGAAGCGCTTAACAGCTCTCCTGCTTTGATCAATTCAAGCCCTTATAAAGATGGATGGATAATTAAAGTTGAAATAAGTGACAATGGTGAACTAAACAACTTGATGGATTCAGATCAATACTCCAAATTCTGTGAAGAAGAAGATTCCAAGCACTGATGATCTTGGCAAGATCTTTCAGCACTCTTCAATCTCCATGGTGTAGATCATGTTTT…
Gma.2110.1.S1_x_at	BU548865	At3g53620	1e-105	Metabolism			GAACAAGGAAGTTGCAGTGAACGACTTTCTTCCTGCCTCAGCTGCCTATGAAGCGATCAAGCATTCCATGACCTTATATGCGGAATACGTTGTGGAGAACTTGAGGCGGTAGTGTTGATTCCTGGGTGCTTGGAATTTTGTTTGGTTGTGAAGACATACATTACATGTATTCAAAGGCTGCTATTATAATTACGATTATGACGATAACAAAAGCTTTCTATCCTTGTCGCGTGTGCATTGGTCTCAGGGCTGCAACATGCATATTCTACACATGTGCTTAGTTTTGAGT
Gma.2113.1.S1_at	BM519739	At3g25140	0	Metabolism			TACTACGCAACAACAAAGCCACTGGANAAGTCATGGCATGTTCTGGGACTTGGCTATAACCCAAGCATCAGCATGGATGAGATTAACAATGCAGCAGTNGTGCACTTCAATGGCAANATGAAACCATGGCTNGACATTGCAATGNCTCAGTTCAAGCCACTTTGGACAAAGTATGTTGACTATGAATTAGATTTCGTTCAGGCCTGCAATTTTGGTATCTAAATGGTCAAGTTTCTTCTCACATGGTGATGCTGTGTTAGGTGCCACAGCAGTTTATTTGCTGTTTAGTTTTGATACATAATGCTTATACGTTTAACAGAGTTCCTAGCTGGTGCNAGGAAAAAATCTTGCTTCTTTCAATTGTAAAATAATACTTTAGTANAGNTATTCTCNNATGTC…
Gma.2119.1.S1_at	BU081878	At5g03650	1e-102	Metabolism			GTACATGTGCCTTGCTAGGTAATAAGTTGTGATANCACACCCATCTTCCTNTTTTTACTTTTTAGGATTTANCGTCTTGACATGTNATAAGTTGCGNCNCGATTGANAAATGTGAATCAACAAAGCTATGGTCCGCGAACCTGAGACTCAATGTACCTATGCACNTATCAATCTTCATNAAGTGCNTACTCTGTTNAAGAGTTGGAAGNNNNNNNNNNGNTTTTACCGTGGGAAATTTTGCAGGAGGCTTTTANANATGTTTCCTTTAGATTNNATTTTTATTTATTGNTTAANCTGTTTCCTTTATATTTNAAAGTTGAGTTGTAGCANNANTCANAGTATTCTATGCAGTGTAATAAAGAC
Gma.2019.1.S1_at	U26457.1	At1g55020	0	Metabolism			CCAAGTTCGAGACCCTTATTGACATTTCAGTGATAGAGATATTGTCAAGGCATGCTTCTGATGAGGTCTACCTTGGCCAAAGGGATAATCCAAATTGGACTACGGATTCAAAGGCATTGGAAGCTTTCAAAAAGTTTGGAAACAAACTGGCAGAAATTGAGGGAAAAATCACACAGAGGAACAATGATCCAAGTCTGAAAAGCCGACATGGGCCAGTTCAGCTTCCATACACATTGCTCCATCGTTCAAGTGAGGAAGGGATGAGTTTCAAAGGAATTCCCAACAGTATCTCCATCTAAAATGTGTGTGTGGTTTGCTTATCTATTGTG
Gma.2061.1.S1_s_at	AW348425	At5g41670	1e-88	Metabolism			GCTGGGATTAGTACTCCCGGAATGTGTGCCAGTCTTGCTTACTTTGATACCTATCGGAGGGCAAGGCTGCCGGCAAACCTTGTCCAGGCTCAGAGGGACTTGTTTGGGGCGCATACTTACGAGAGGGTTGATCGCCCTGG
Gma.197.1.S1_at	U55874.1	At3g47340	0	Metabolism	Amino Acid Biosynthesis/Metabolism		CCCTCAGAACTCAGCCAGGCTGAGTGTTCCTGGAGGACCAAGTGTTGCATGTAGCACAGCCAAAGCTGTNGAGTGGGATGCTGCTTGGTCTAACAACCTTGATCCATCTGGTAGNGCAGCACTTGGAGTGCATGCATCAGCTTATGGAAATCAGGTCAAAGCTGTAGAACCAGAGAAGATCATACCAAAGATGGAAGTTTCCCCACTAGGAGTTGCCATATAGAGCTAGTATGAGCCATAGCAAAAACTAGTAGTTGCCCTAGAACCAAAATATATTATTATACTAGTCATCAATNACTCATTAATCATCATAAATGAAAATTTGGCCTGCTGTGTAGTTTATTCAGGCAAGGCTATATATAAATA
Gma.2211.1.S1_at	AI442877	At3g53520	1e-162	Metabolism			GTTTACCATGTTAGAGCTTGCTCAGGTTGTNAAAGAAACAATTGATTCAAGTGCTACAATAGAATACAAACCAAATACTGCTGATGATCCACACATGAGGAAGCCAGATATTAGCAAAGCNAAGGAACTGCTGAACTGGGAGCCAAAAATCCCNCTGAGAGAAGGGTTGCCTCTNATGGTTAATGATTTCCGAAATCGNATTCTGAATGAANACGAAGGAAAAGGGATGAAATAAGCATAATAGCAAACCCTGTATGTATATGGAGATGAGCNTGTCTCCTTCATTTTTTNGTTCTNATTTGCGGTCAGCATCAACAGAAAAATTCTGGNAACACGTCANNNNNNNNNNNAGATATANCTACTGCTGGCCTTTTNACATTTAATCATTTATGCTTGCTT…
Gma.2281.1.S1_at	BI317540	At1g54580	9e-27	Metabolism			GAGTCTCGAGTGTTTTAGTTGTGAACTCTGTTGNNNCGTGATTAAANCAAGTCTGAGAAGAAAAACAAATTAGTCCAACCTTTTGTTTGTTTCTGGAAGTTAGTTATATNAAGTTGTGTTTTTGCNTTAANGGGTTTTTGTCAATGATATGNTAATTTTAATAGATGTAGATTTATGTCAATGATATTGTATGTTAATTTTATTCAGTCTCGTATCTAGCTGAATAATTAAGAATTATACTACGTCATGCCTATAACACTTGAGGTGCTTAAA
Gma.2281.1.S1_x_at	BI317540	At1g54580	9e-27	Metabolism			ATGCCGATCAATATTTATGGTGTGGGGNCAATTNNGAGTCTCGAGTGTTTTAGTTGTGAACTCTGTTGNNNCGTGATTAAANCAAGTCTGAGAAGAAAAACAAATTAGTCCAACCTTTTGTTTGTTTCTGGAAGTTAGTTATATNAAGTTGTGTTTTTGCNTTAANGGGTTTTTGTCAATGATATGNTAATTTTAATAGATGTAGATTTATGTCAATGATATTGTATGTTAATTTTATTCAGTCTCGTATCTAGCTGAATAATTAAGAATTATACTACGTCATGCCTATAACACTTGAGGTGCTTAAA
Gma.2294.1.S1_at	BI425775	At1g09780	1e-159	Metabolism			CCAGCGACTATGAGACAACTCTCGTAGAAGTGGTTGATAACTAGGAACCAATAGATGAATTTTTATAATTTGAAAAACAAACAGGGAAAGCTGTAGATTGCAGCCCTCAAAATAATTGAAAGTTTTCATCCTTATTCCACATGTGTGGTGGTTTTGTTCTTATGAGTTACCAATACCAGTCTGCAGTTGACAGAAAAGTATACCTAATTAATGGCATTTTGGCACTCTCTTTTAACT
Gma.2308.1.S1_s_at	AF022462.1	At4g15350	6e-75	Metabolism	Cytochrome P450	CYP705A	GACAGACCATCGGAGTTCCGTCCTGAGAGGTTCCTAGAGACAGGGGCTGAAGGGGAAGCAGGGCCTCTTGATCTTAGGGGACAACATTTTCAACTTCTCCCATTTGGGTCTGGGAGGAGAATGTGCCCTGGAGTCAATCTGGCTACTTCGGGAATGGCAACACTTCTTGCATCTCTTATTCAGTGCTTCGACTTGCAAGTGCTGGGTCCACAAGGACAGATATTGAAGGGTGGTGACGCCAAAGTTAGCATGGAAGAGAGAGCCGGCCTCACTGTTCCAAGGGCACATAGTCTTGTCTGTGTTCCACTTGCAAGGATCGGCGTTGCATCTAAACTCCTTTCTTAATTAAGATCATCGTCATCATCATCATATGTAATATTTACTTTTTGTGTGTTGATA…
Gma.2311.1.S1_at	AF141602.1	At3g01120	1e-167	Metabolism	Amino Acid Biosynthesis/Metabolism	Methionine Biosynthesis	TGAAGCGGGTCTACTATCCAGGCTTGCCGAGTCANCCTGAACATGAGCTTGCCAAGAGGCAGATGACTGGTTTCGGTGGTGTTGTCAGTTTTGAGATTGATGGAGATCTACATACCACAATAAANTTTATTGATTCANTTGAAAATCCCNTATATTGCGGCCTCGTTTGGTGGCTGTGAGAGCATTGTGGATCAACCTGCTATTTTGTCTTACTGGGATCTTCCTCAGTCAGAAAGGGCCAAGTANAAGATTTATGACAACCTGGTTCGCTTCAGCTTTGGAGTTGAAGATTTTGAGGATTTGAAGGCTGATGTCCTGCAAGCTCTGGAAGCTATATAGACAGTTTTCCTGATTCACCCANGTTTTTTTNCTTTTANTAATNGTGNTATNTGTTNNTNN…
Gma.2313.1.S1_at	AF452454.1	At3g22890	0	Metabolism			GATGGAAGGTGCTGGTTGATTACTATGATAGCTTAGTACTCTCAAGCAACGGCAAAGTGCAGGAAGCTGTTCCAGCTTAATCTTGTATCATATCATAATGTATATATCTCATGATTGGGAGAAACCTTAAGCTTATGTATTCTCCTGCTAAGACATACTTCACGAGGATCCTCTGGCCCAATCTAATAATAATAATAAATTAAAACTTTGGGGAGGCACAAGCACGGACACATTG
Gma.2313.1.S1_s_at	AF452454.1	At3g22890	0	Metabolism			AGCGTCTAAACATTCTTCCTTTCAGGGTTGCTGCATATGACAAGACTCAGGGTAAAATGGCATTCTTTGACCCTTCAAGGCCTCAGGACTTCCTGTTCATATCAGGCACAAAGATGCGCACACTGGCAAGGAACAAAGAAAGTCCTCCTGATGGATTTATGTGCCCTGGTGGATGGAAGGTGCTGGTTGATTACTATGATAGCTTAGTACTCTCAAGCAACGGCAAAGTGCAGGAAGCTGTTCCAGCTTAATCTTGTATCATATCATAATGTATATATCTCATGATTGGGAGAAACCTTAAGCTTATGTATTCTCCTGCTAAGACATACTTCACGAGGATCCTCTGGCCCAATCTAATAATAATAATAAATTAAAACTTTGGGGAGGCACAAGCACGGA…
Gma.2319.1.S1_at	AW349967	At4g34510	4e-16	Metabolism			AACAGTGCGGTTTGGCAGGCTCTGAGNAATGTGAGGCCTTCTCCTAATGGACCATGGGAAGATTGCATTCATAAGTATCCTGTGGAAATAGTCACATAGTGATCATAGTTCAGTTCAGTTCTCAGTCACATACTCTGGCTGCTACAACTTAATTCAGGGTACCCTTCATTAGTTTCCAGATCCATTGTCTCTCTCTCTGTTGTAGATTTCATTGTGTAATTCACTGCCTCTTTTGTGTTTGATGATTGTGGATTTTCATTGGGTTAAATTCATGTATCTGGAGTAATATGATANGGGGAATTCCTGAATTTTTTTTCTTCCTGCTGATGCACTTATGAATTTTTATTTTTTTAGTCATAAAGTTGCGCCTGGGTAACGAGGCGCTTATAGGCCCCGATG…
Gma.16174.1.S1_at	AW309513	At4g14880	1e-13	Metabolism			GTTTTGGAGAGCGTTATCTATCGTCTGTGCTCTTTGAANCCGTGAAGCGAGAAGCAGAGAGCTTGGTCTTTGAGCCTTGAATGTCAAGTCATACGAGCCATTTGCTGCTTCTCAAGTTGCATTCTGTCCTTGGGTTGTGTATATATTTTTTCTCTTATGGATCTAAAAAATAAAAAGGATTTCTGTTTGCTTGTTAATTGACTAAGATTCAATAAAAATATAGTAGTTTGCTGAAANNNNNAAANNNNNNCATAATTTGTAGATCATGATGCCGCGAACTCATGCTTGTACTATTTTATTTACTAGTTAAATTTTGCTTCTTAAAACTTGTAATGGA
Gma.15564.1.S1_a_at	AF293970.1	At2g22240	0	Metabolism			TTAGCTGCTCCTATTATCTTGGACTTGGTCCTTCTTGCTGAGCT
Gma.15564.1.S1_at	AF293970.1	At2g22240	0	Metabolism			TATTAAGTATGTGCCTTACGTAGGGGANAGCAAGAGAGCCATGGATGAGTACACTTCAGAGATATTCATGGGTGGAAAGANCACCATTGTTTTGCACAACACATGTGAGGATTCCCTTTTAGCTGCTCCTATTATCTTGGACTTGGTCCTTCTTGCTGAGCTNAGCACTAGAATCNAGTTTAAAGCTGAAAATGAGGGAAAATTCCACTCATTCCACCCAGTTGCTACCATNCTCAGCTANCTNACCAAGGCTCCTCTGGTTCCACCGGGTACACCAGTGGTGAATGCATTGTCAAAGCAGCGTGCAATGCTGGAAAACATAATGAGGGCTTGTGTTGGATTGGCCCCAGAGAATAACATGATT
Gma.1559.1.S1_at	CD394386	At1g69230	1e-06	Metabolism			AAGAGCATGGGTCGTGGAGTTAGCAGTGGTGGTGGTCAAAGTTCNTTGGGTTATCTTTTTGGCAGTGGAGAGGCCCCTGCCNCAAAACCNGCAACAAANAATGCCCCAGCCCAACCTGAAGTGCAGGCTGTAAATAATGNGCCTCCTNCAAAAGCATCTCCTCCTACTAAAACAATAGACCCTAACAAGGCTGCTGGTATNAACAGTCATTCTACTGATGGCCAGAACACCGGCAACTTCATCACGGACCGACCCTCAACCAAGGTCCATGCTGCCCCTGGTGGTGGTTCTTCNCTNGNGTTATCTCTTTGGTGNACCTGGNGAGGGGAAATGATACCTTGNTTGCAAAGCTTTTGCTCGATGANNNANGATTTATTTTGNAAATTCAGGTCGTGGAAA…
Gma.1560.1.S1_s_at	BQ298777	At1g78380	3e-74	Metabolism			GAGACACTAACTGACAAACCCTTTTATGGGGATGACACGTTTGGCTTTGTTGATCTTTGTTTGATCACTTTCTCTAGTTGGTTTTATACTTATGAGACATATGGGAACTTCAAAATGGAAGAAGAGTGTCCTAAACTCATGGCTTGGGTCAAGAGATGCATGGAGAGAGAGACTGTGTCCAATACTCTNCCTGATGCTAAGAAGGTGTATGGTCTTATTGTGGAACTGCAGAAGACACTTGAATCGAAATAGAAGATTTCAATAAATCAACCCATTAAATAATATTTTCATGTTAAATATGTTGTTGTAAGGTCTTGTGTACNNNTCCTCTATGGTTGTGTGGGTTGGGTCAGTCATTTATGTGGTTTACTAGACACTAATACATCTTCTCTATTGAAG…
Gma.15863.1.S1_s_at	CD413163	At4g25700	1e-101	Metabolism			CGAGCTTAACGATGTATTTGCAATAATCAACGCTGTCCCTGCCATCGCTCTCCTTTCCTATGGTTTCTTTAACAAGGGACTGGTCCCTGGCCTTTGCTTTGGTGCGGGTCTTGGAATTACNGTCTTTGGGATGGCCTACATGTTTGTACACGATGGATTGGTTCANAAGAGATTCCCGGTGGGCCCCATNGCNAACGTGCCCTATCTCAGAAGGGTGGCCTCTGCTCACCAACTT
Gma.1571.1.S1_at	BQ612406	At1g74920	0	Metabolism			AGAAGTTTTTGGACCTGTGCTATGTGTGAAAACATTCAGTACCGAAGAAGAAGCTATTGAACTAGCAAATGACACACACTACGGCTTAGGGTCTGCTGTAATGTCAAAAGATCTAGAAAGATGCGAGCGCATATCAAAGGCTATTCAGGCTGGAATTGTATGGATAAATTGTGCTCAACCAAGCTTCATTCAAGCTCCATGGGGAGGCGTTAAACGTAGTGGTTTTGGTCGTGAACTAGGAGAATGGGGACTCGAGAACTATTTAAGTGTGAAGCAAGTGACCAAGTACATATCTGATGAACCGTGGGGCTGGTATCAGTCGCCTTCAAAGCTGTGATATGAATTGCTGTTCTAAAATCTGGCATGAATAAGTTGTGGGGGACATTAATTTGTGATGAT…
Gma.15775.1.S1_at	BU765934	At2g37790	1e-122	Metabolism			AATATGCTTCATAGAGATGTTGACAAATGCACTGCTCCTCAAGCAGATTGATTCCGCCTTTTACCTGTTAAGATCTTAAAGCTACCAGCTGTAGTGATTCAAGTATGTTTGAGATTTTGAGAAGAGCTATTGTTCATAATAACACAAAGTAACCGAGACTTATTTTTCATTTATAATTGTTGTATCTTTAATTCAATCTAAAGAAACCAGTGCAGTGAATTTTAAAGGTCTGGTAGCCAA
Gma.16444.1.S1_a_at	AW101824	At1g20330	1e-179	Metabolism			GGCGGAACCATATTGTGGTCACTGTTCTCGCCGCTTTGGGAATCGCGCCTAAGGGGACCGTCGATGTTCATGAGATGCTCTTCAAGACCGCTGACTATTTGACCAGAGGG
Gma.1650.1.S1_at	BM893382	At5g40370	1e-40	Metabolism			GAGATATCGAAGATGGCTCTGCCCAAAGCTAAGGAGATCGTGTCGTCCAATTCCGTCGTCGTTTTCAGCAAAACCTATTGCCCTTTCTGCGTCGATGTGAAGAAGCTCTTCGGTGACCTCGGTGCCAATTACAAGGCCATCGAACTCGACACTGAATCCGATGGAAAAGAGCTCCAAGCAGCATTAGTTGAGTGGACGGACCAGCGAA
Gma.16580.1.S1_at	CD404403	At1g19600	1e-147	Metabolism			GAAAGATGATCCTATAGCTGCTGTAGAATTTCTTTCCAAATACTGCCAATGGGCTGTTGTAACATTGGGTGCTAATGGGTGCATTGCCAAACATGGAAAGGAGATGATACAAGTCCCGGCCATTGGGGAAACAAAGGCAACCGATGCTACAGGAGCAGGGGACCTTTTTGCAAGTGGATTTTTGTATGGAGTGGTCAAGGGTTTGTCACTAGAAGAATGCTGCAAAGTAGGCACATGCAGTGGTGGATCTGTTATCCGGTCTCTTGGTGGTGAGGTAACGTTGGAGAATTGGCAATGGATGTACAAGCAGATGCAGATAAACGGTCTGCCCACGCCTNCCGGTTTATGCAAATGAATAGTAGCAACCGTTGCCCCCTTAATTTGTGCTGTCTTATATTT…
Gma.16735.2.S1_at	BI699988	At1g75280	1e-108	Metabolism			AACTATTGCACCCAAGTTGATCAATAAAATCAAAGCATCTTGTTGTGTATGGCTGGAGAATATGTACTGTCTTTCTATTATTTAGTTACTTGTGCTTGTGTTGGCGTCAAAAGAGTTCTTCCTTACTTTACACTGTAANCTGTACTGTTGTTCGCTTAGCTTGNNNNNNNNNNNAAGTTCTTCTAGTATTTATTATGGNTCCGTTGCAATTTGTTCATCACCACTCTGATCCTAGTGGATGTGCGTTGAAACTCAATTGCCAACAAGTATTACAGTGTGATTATCTCGAAGTTCTTAT
Gma.1681.1.S1_s_at	BI967482	At1g02500	0	Metabolism			AGTGGTGCCTACATTGTGAGGCAAGCTGCAAAGAGCATTGTTGCAAATGGACTTGCTAGGAGGGCAATTGTGCAAGTTTCCTATGCCATTGGTGTGCCTGAGCCCTTGTCTGTGTTTGTTGACACTTATGGCACTGGGAAGATCCCTGACAAGGAAATCCTCAGCATTGTGAAGGAGAGTTTTGACTTCAGGCCTGGCATGATCTCCATCAACCTTGATCTCAAGAGGGGTGGAAATGGCAGGTTCTTGAAGAC
Gma.1681.2.S1_a_at	BI786679	At4g01850	1e-58	Metabolism			AGCACAAAGCGGGTTACTGTCTGTTCAAGCTACCATCTCTCTCTCTCTTTCTTAGTGCCTCCTTGCCAGAAGTTAAAATGGCCCAAGAAACTTTCCTATTCACATCTGAATCAGTGAACGAGGGGCACCCTGACAAGCTCTGTGACCAGATCTCCGATGCTGTGCTCGATGCATGCTTGGAGCAGGACCCTGACAGCAAGGTTGCCTGTGAAACCTGCACCAAGACCAACATGGTGATGGTTTTCGGAGAGATCACAACCAAGGCCAACGTGGACTATGAGAAGATTGTGCGTGACACATGCAGGAACATTGGTTTTGTCTCTGATGATGTTGGTCTTGATGCTGACAACTGCAAGGTCCTCGTCAACATTGAGCAACAGAGTCCTGATATTGCTCAAG…
Gma.1689.1.S1_s_at	AB007907.1	At3g02360	0	Metabolism			GCCAAAATCTGTAGTTATGCACAGGGAATGAATTTGATCCGTGCAAAGAGTATTGAAAAGGGTTGGGATTTGAAGTTGGGTGAACTGGCCCGGATTTGGAAAGGNGGTTGCATNATTAGAGCAATATTCTTAGACAGAATCAAGCANGCNTATGANAGAAACCCTAATCTGGCAAACCTTCTTGTGGATCCAGAGTTTGCAAAGGAAATAATNGATNNCCAATCTGCCTGGAGGAGAGTTGTTTGCCTTGCTATCAATTCTGGTATNAGCACTCCAGGTATGTCTGCTAGTCTTGCTTATTTTGACACTTACAGAAGGGAAAGGTTGCCAGCTAATTTGGTGCAAGCTCAACGAGACTACTTTGGTGCTCATACATATGAAAGGGTTGACATAGAGGGG…
Gma.16930.1.S1_at	CD400862	At4g13930	0	Metabolism			TTTGGTGATAGCAGTGCCTTGGCCCCNGGTGGAGTGCGAATTGGNGCCCCTGCCATGACTTCTAGGGGTTTGGTTGAAAANGACTTTGAGCAGATTGGTGAGTTCCTTCACCGTGCTGTGACTCTCACACTGGAGATCCAGAAGGAGCATGGCAAACTTCTCAAGGATTTCAACAAGGGNCTCGTCAACAACAAGGCNATTGAAGATCTCAAAGCTGATGTTGAGAAGTTCTCTGCCNNNTTTGACATGCCTGGCTTCCTGGTATCTGAAATGAAGTACAAGGATTAGGTTCAANCATANCNCTNTCTACTNAATTGTGTCACTCAANGTTCGNCACAAAGNGCAGAAATGGAGAAAAAGGAAATANGTGTCTTCCTTTCCTGGGAGTGATAGGGTTTA…
Gma.1838.1.S1_s_at	BM270054	At2g44620	8e-41	Metabolism	Fatty Acid Biosynthesis		AAACTGCAGCCATGGCGTGCCATGTCATCACACGGCGACGATCATCTCTCCAAAGAGGAGGTCGTCGAAAGAGTCCTCGCCGTCGTCAAAGATTTCCCCAAAGTCGATCCTTCCAGGGTGAGTCCAGATGTACATTTCCAGAAGGATTTGGGTTTGGATAGCTTGGACAATGTGGAAATTGTAATGGCACTAGAAGAGGAGTTCAAGCTAGAGATCCCAGACAAGGAAGCTGATAAAATTGACTCTTGTCATCTTGCTATTGAGTACATTTCTAACCATCCCATGGCTGGTTAACTAATGTGTCCTTTTTCCTATTTGGCTTCATGTTGAACTTAAACANCAGTGCAACCTTGAACCTTCCCCTTACTTTCACTGGATGTTT
Gma.1917.1.S1_at	AF243365.1	At1g78380	4e-82	Metabolism			CTGATTATGTTGACATTAAGATACATGATCTTGGAAAGAAGATTTGGACATCAAAGGGAGAAGAAAAAGAAGCTGCCAAGAAGGAGTTCATAGAGGCCCTTAAATTGTTGGAGGAACAGCTGGGAGATAAGACTTATTTTGGAGGAGACAATATTGGTTTTGTGGATATAGCACTTGTTCCATTCTACACTTGGTTCAAAGTCTATGAGACTTTTGGCAGCCTCAACATTGAGAATGAGTGCCCCAGGTTTGTTGCTTGGGCCAAGAGGTGCCTACAGAAAGAGAGTGTTGCAAAGTCTCTTCCTGATCAGCACAAGGTCTATGAGTTCGTTGTGGAGATAAGAAAGAAGTTAGTCATCGAGTAGGTTTCATGTTGGATCTTAATAGCCATAGTGAAGT…
Gma.1917.1.S1_s_at	AF243365.1	At1g78380	4e-82	Metabolism			ATGAGTTCGTTGTGGAGATAAGAAAGAAGTTAGTCATCGAGTAGGTTTCATGTTGGATCTTAATAGCCATAGTGAAGTATTGGTCGTTCTTGACCTTTCAACTAAATAATATTTGTGTAATAAAAAGGCATTTGGATGTGCCAAA
Gma.1928.3.S1_a_at	BI426837	At5g26667	8e-94	Metabolism			GTGGCAATGACAAATTTCTTATTGATGGTTTTCCCCGCAATGAGGAAAACCGGGCAGCATTTGAGAAAGTGACAGGAATAGAGCCAGCATTTGTCTTATTTTTTGATTGCCCTGAGGAAGAGATGGAGAGGCGACTTCTTAGTAGGAACCAGGGTAGAGAAGATGACAATATTGAAACAATAAGGAAGCGGTTTAAGGTTTTCTTGGAGTCTAGTCTTCCCGTGATTAATTATTATGATGCAAAGGGAAAAGTTCGCAAGATTGATGCTGCAAGACCTATCGAAGAGGTATTTGAGACAGTCAAAGCAATTTTTGGTCCAAAGAATGACAAGGCTGATTGAGCATGTTCATCTTGACTCCATGGTGGAAATTTAGAGGTCATATCAGTATTGGTGGCTT…
Gma.17774.1.S1_at	CA935572	At3g02360	3e-05	Metabolism			CAAGTAGTGCGTTAATCCAAGTAGTTGATTTCCGTTGCTTTTATAATTATGTTGTCAAATTGGGCACCCAGTTGTTAGAGGCACTGGTTTCTCCTTTTTGATGTTTTGATACATTTTTGTTTGGTTTAATTCGTCTTATGTTATTAGCTGAAAACAATGCTGTTACTGCGTTTGCGAATCAACATGATCTCTTATATGCAA
Gma.1738.1.S1_at	AW278755	At2g39770	1e-170	Metabolism	Colanic Acid Biosynthesis		GGTCCTGGCTGCGTTATTGAGCAAGGTGTTAGACTCAAAAGCTGCACAATAATGCGTGGAGTCCGAGTTAAGAAGCATGCTTGTGTATCCAGCAGTATTGTTGGGTGGCATTCAACTGTTGGGCAATGGGCTCGAGTGGATAATATGACCATCCTTGGAGAAGATGTCCATGTATGTGATGAAATTTACAGCAATGGTGGTGTTGTTTTGCCGCACAAGGAGATCAAGTCAAATATTCTGAAGCCGGAGATTGTCATGTGAGTGAGGTCAATGATGTTCAAATTGGTACCATGTGGTGAGGAGGTAGAAAAATTATTGAGTCTGGAATATGTTTGTCCGTTTCATTTGGTTTTCCTTTTTACTTCATGGCATTTCTTTCCTTTCTATAAGTCAGTTTTT…
Gma.17599.1.S1_at	BI699318	At1g23800	0	Metabolism			GGCAACAAGGGCTTCTACATTCAACCTACAGTCTTCTCAAATGTTAAGGATGGCATGCTGATTGCAAGGGATGAGATCTTTGGTCCAGTCCAATCCATATTAAAATTCAAGGATCTTGGTGAGGTAGTTCAAAGAGCAAATAACACACGTTACGGGCTTGCGGCCGGAGTGTTCACAACGAACATGGACACTGCCTACACTTTGACGCGGGCACTGAGAGTTGGAACAGTNTGGATAAACTGCTTTGACACATTTGATGCT
Gma.17594.1.A1_at	AW310993	At1g64660	3e-16	Metabolism			TGAGCTTGGGCTACTACGAGACCCTCATGTCCTGCTCCGGCAGCAGCACCAGCAGTGAACTCAGCACTGAGGAGAAGGAGCTCGCCGGAATCTCGCCGGGGCTCGTGAGGATGTCGATTGGGTACATTGGAACCTTGGAGCAGAAGTGGAGCCAGCTCCAAAAGGCGCTCACTAGACTAAACGACTCTGGATACAACAAGATCGCTTGAATTGCTTTTCTCATCATGCACATGCACATGCACCCTCGTCTTCTTCCTGCTCCCTTAATGTTATGTTATCTAT
Gma.17686.1.S1_at	BF597378	At2g45550	1e-108	Metabolism	Cytochrome P450	CYP76C	ATTTACACCTGAAAGATTCCTGGAAAGTGACATTGATTTTAAAGGCCATGATTTTGAGCTAATACCCTTTGGAGCTGGAAGAAGGATTTGTCCTGGGTTGCCATTAGCATCTAGAACTCTGCATGTTGTGTTGGCATCTCTTCTATACAACTATGATTGGAAGCTCACGGATGGACAAAAGCCAGAAGACATGGATGTATCTGAGAAATATGGAATTACCTTGCATAAGGCACAACCTCTACTAGTTATTCCCATCCAAGCAT
Gma.17702.1.S1_at	CD414209	At3g14680	1e-67	Metabolism	Cytochrome P450	CYP72A	AAGCTTTCCTACTTGCCATTTGGATGGGGTCCTCGACTCTGCATAGGACAAAACTTTGGCTTGTTAGAAGCAAAAGTAGCTGTGTCAATGATCCTGCAACGTTTCTCCCTCCATTTTTCCCCCTCCTATGCTCATGCCCCCTCCTTTATTATCACTCTTCAGCCTGAGCGTGGGGCTCATCTCATTTTACGCAAACTCTAGAATGCACTTTTTAGTCTAAATAAGGCTTCTTCATTTGAGGCGTGTTTGCAATTTTAGTTTTCCTATTCCTGCTAGTTTCTTATGTAGACGATAGATCNGAACCTTCACTTCAAATCTATTTCCAAGATCAATATATACCTGTTTNGCCTAAGTTACTGGTGTAATTACTCCTCCT
Gma.17702.2.S1_a_at	AW831290	At3g14680	4e-32	Metabolism	Cytochrome P450	CYP72A	GGCTAGGGAGGAGGTTTTCCAAGTGTTCGGGAATGAAAAGCCAGATTATGAAAGGATTGGTCAACTGAAAATTGTAAGTAACATAATTAATTAATTAATGGCTTGATTCATTTCAGTTCACCCTAATCATCGTCCTACACTACAGGTGTCGATGATTCTACAGGAGAGTCTCAGATTATACCCACCAGTGGTTATGTTCGCTCGGTATCTTCGTAAAGATACAAAACTTGGAGAGCTTACAATTCCCGCAGGAGTGGAGCTTGTTGTACCTGTGTC
Gma.17610.1.S1_at	U50075.1	At1g55020	0	Metabolism			CTATCTAAGGGCTCTATGGTTGCTGAAGTACTGTCCCTGGCT
Gma.17610.1.S1_x_at	U50075.1	At1g55020	0	Metabolism			TGACTACTGGACTTCTGATGCCGGGCCATTAGAGGCCTTTAAGAGGTTTGGAAAGAATCTTGAAGAGATTGAAAAGAAGCTTATAGAGAAGAACAATNATGAGACATTGAGAAACCGCTATGGGCCGGCTAAAATGCCTTACACTTTGCTCTATCCTTCTAGTGAGGAGGGATTGACTTTCAGAGGAATTCCCAACAGTATCTCTATCTAAGGGCTCTATGGTTGCTGAAGTACTGTCCCTGGCTTTAAATA
Gma.17610.2.S1_s_at	AW348397	At1g55020	0	Metabolism			TATCTAAGGACCCTATGGTTGCTTAAGTACTGTTCCTGGTTTTAAATAAATGTGAAATTGAAGGAACCAGATTCCTTAATCAGTTGTGT
Gma.15037.1.S1_at	BE347885	At5g27320	2e-06	Metabolism			TGCTCCCGCTATTAGGTACTTACATGCTACTAAATGTGTCGTGAGATTTGGTGTAATCAGCATATAGCTGTGTGATGTTTTTCCTGAGCACATAATGAGGAAATTGGGTGCTGCGGATAGGTGANAGCTTTTTAGGACAAAGGGAGCTCAGGTCATGTTTATGGGAACCACCAAAGTTGTGATTACCCACTCTGACTTCTAGCCAAAAAGGAGAGGAAGGCCTTATTCTATTTCTGGGCGTGACCTTGATGCCAATCAGGTGGGGCTTGTCGTTGTCTGGCTAGTGTTATATATATATATATATATATAACTAATTTTGGAACTAGGATAGGAAAATATCAATGATATGTTGGTGCTGTTAGGTTATATACGTCTGTGCTATCTTCATATGAGTGTTTT…
Gma.15059.1.S1_at	BG725838	At2g39420	1e-39	Metabolism			GAGAACAGCCTACGAACTTCTGAGGGTCAGTACAGAAATTGAGCAAAGTCTGCATGAGGTTTCACTACCCTTTATAGTTTTACATGGTGAGGAAGATCAAGTGACTGATAAAGCAGTTAGCAAACAACTATATGATGAGGCGGCAAGCTCAGATAAGACNNTAAAGTCGTATCCAGAAATGTGGCACGGTCTATTGTATGGAGAGCCACCACAAAATTTGCAGATTGTATTCTCCGATATTATTGGTTGGATAGNCCAGAAATCTCGCTATGGAANTACACGATTGGAGAGAGAGCTAAAAGAAGAACACGAACATTTGTTCAAGTCTGATCTCTAGCCAAAGAAATTTGTCTTTCTTGGAGGTCTTTGGANAACAAGTGTGCACGACATCGNCTGCTA…
Gma.15066.2.S1_at	BG044740	At1g20270	1e-109	Metabolism			GCTCACTATAGTTTTATTCCTGTTGAGCATGGTGAAGGACTTCAAGTTCTGCACTATGAAGTTGGACAAAAGTATGAGCCTCACTANGACTACTTTCTTGATGATTTTAACACTAAGAATGGGGGTCANCGTATAGCAACAGTGCTGATGTACCTTACTGATGTTGAAGAAGGGGGTGAGACAGTGTTNCCAGCTGCCAAAGGGAATTTTAGTTCTGTGCCATGGTGGAATGAGCTTTCTGAGTGTGGAAAAAAAGGACTTTCNATTAANCCNAAGAGGGGNGATGCTCTACTTTTTTGGAGNATGAAGCCAGATGCAACTTTAGATCCA
Gma.1451.1.S1_at	BE209936	At2g39570	1e-149	Metabolism			GAACTTCTGGTTGCTAATCCTGTGGAGCTGAGTGGAAAGGGGAGACCCCGTGTATTCTATGATGTTACGTTGACTTTAAAAGCGTTGGGAGTAGGCATTTTCTCGGCTGAAGTTGTTAGACATTCAACACAAGAACGTCAATGGGAAGTGTATAGATTTTTGTTGGAGGAAAGCCGTGACTTTCCATTGACCAGAAGCCAAGCAAGAACTCAGATTGTTGACAAAGTTAGAAGAACACTGATGGGCTGGTAATCTGGTTCAGTATCAAATGAAAAAGCACTTTCCGTTCAGTTTTTATGTTAAATATCAATTTGGTTTGCCGTTTGAATATGGTTAAGTTAGCAGGGTATCTAATTAACGACAAACATATACTTTTAGCATTGTACATCATCTTATGTT…
Gma.1449.1.S1_at	AY157740.1	At4g09320	2e-72	Metabolism	Nucleotide Biosynthesis/Metabolism		AGTAATACAAATGCCTCAAGTTGATCTTGAAATTGGCCTTAGGTTGATCCAGATTATCTACATGTTTTCTGTTTTTGTCCATTGTTGGACTTTTGCTAAGAGTTTGGTACCGTGGTTTGCATGTAGAGTCTATTTATGTCATTTCTGTTGAANCATGCTCACAGTTTGATAAATTAAA
Gma.1449.1.S1_s_at	AY157740.1	At4g09320	2e-72	Metabolism	Nucleotide Biosynthesis/Metabolism		TGGACCGTCCTTTTGCTGAGAAGCACTATGCTGATTTGTCTGCAAAGCCTTTCTTTAGTGGTTTGGTGGATTACATTGTCTCTGGCCCTGTTGTTGCCATGATCTGGGAGGGTAAGAATGTTGTTACAACTGGCCGAAAGATTATCGGAGCCACAAACCCAGCTCAATCTGAGCCTGGAACTATTCGTGGTGACTTTGCTATTGACATTGGAAGGAATGTTATCCATGGAAGTGATTCAGTTGAGAGTGCTAACAAGGAAATTGCATTGTGGTTCCCTGAGGGCCCTGCTAACTGGCAAAGCTCCCAGCACTCTTGGATCTATGAGTAATACAAATGCCTCAAGTTGATCTTGAAATTGGCCTTAGGTTGATCCAGATTATCTACATGTTTTCT
Gma.14855.1.S1_s_at	BU550191	At4g33680	0	Metabolism			CGGCCGAAGCTCATGGGATGTATTCGCTGAGATTCTTGAGAAGACTCATGTGGTTACAACCCCTGGTAGTGGTTTTGGACCTGGTGGTGAAGGTTTTATCAGGGTTAGTGCCTTTGGTCACAGGGAAAATGTCTTGGAGGCATGCAGAAGGTTCAAGCAGCTATACAAGTG
Gma.15478.1.S1_at	BI968543	At1g02500	0	Metabolism			CATTCCACTGCAATGTGCTGGGAGTTTTTTAGCGTTGCCCTTATAATGTCTATTATCCATAACTTTCC
Gma.15478.1.S1_x_at	BI968543	At1g02500	0	Metabolism			TGGTGTGCCCGAGCCTTTGTCTGTCTTTGTTGACACCTATGGCACCGGGAAGATCCATGATAAGGAGATTCTCAACATTGTGAAGGAGAACTTTGATTTCAGGCCCGGTATGATCTCCATCAACCTTGATCTCAAGAGGGGTGGGAATAACAGGTTCTTGAAGACTGCTGCATATGGACACTTCGGCAGAGAGGACCCTGACTTCACATGGGAAGTGGTCAAGCCCCTCAAGTGGGAGAAGGCCTAAGGCCATTCATTCCACTGCAATGTGCTGGGAGTTTTTTAGCGTTGCCCTTATAATGTCTATTATCCATAACTTTCCACGTCCCTTGCTCTGTGTTTTTCTCTCGTCGTCCTCCTCCTATTTTGTTTCTCCTGCCTTTCATTTGTAAT
Gma.15478.2.S1_at	BQ453781	At4g01850	0	Metabolism			AATTCATTCCACTGCTCTATGCTGGAAGTTTTTTGAGCGTTGCCCTTATAATATGTCTAATATCCATAACTTTCCACGTCTCTTACTCTGTGTGTTTCTCTCCTCTTCCTCCTATTTTGTTATTTGTATGTTCTTTTGTAATTTTTTACGTGATCAACTAAAAACATGTACTCTCTGTTTGTATGTATGCCCTACCAATGTGTCTCTTAATATCAATATCAAAAAGAGAGTGTTCAAGTTAANNNNNNNANNNNAANNNNNNNNNNNNTNNAGNNNNNNNNNCNNNNTNGGTNATATGATAAATGCTAGGCAAGTGTGTTGTTGTA
Gma.15483.2.S1_a_at	AW309524	At1g23190	9e-39	Metabolism	Sucrose Biosynthesis		GATGGATCACGATTGATTTTCCGCCTATCTGGAACTGGNNNNGNNNNNNGCAACAATTCGANTATACATTGAGCAATATGAGAAGGATCCATCAAAGATTGGGAGACTTTCAAANGAAGCNCTTGCTCCTCTTGTGGAAGTTGCNTTGAAACTTTCGAAGATGGAAGAATTCACTGGTCGATCCGCTCCAACAGTCATTACATGAACACATTCAAGTGGAAGGTGGTTAGATCCTGAAGCTTCTCCCAGTCATTTCATTTCTTCTTTGTCCAGTATCTTACGGATAGCCGAACAGTAGATTTGGTTGTTTGCAGCCTTTGCTATGG
Gma.1546.1.S1_a_at	AW348242	At1g62660	1e-108	Metabolism			GCAAGCAAATCGTTGGCAGCGCTGTTCCAGTACTTAAAGATGAAAAGTTTTCCTTGCGGATACTGGTGGACCATTCTATTGTTGAAAGCTTTGCTCAAGGTGGAAGGACGGTTGTGACATCTCGGGTTTATCCAACAAAGGCAATCTATGGAGCTGCTAGGTTGTTCTTGTTCAA
Gma.1535.1.S1_at	L01628.1	At2g22780	1e-152	Metabolism			GAGTACCTGACTGGTCGCATACAAAACGGTGGAACTGAAGTTGTTGAGGCCAAAGCTGGAGCTGGTTCTGCAACACTATCAATGGCATATGCTGCTGTTAAATTTGCAGATGCATGCCTTCATGCCCTGAGAGGAGATGCTGGCATCATTGAATGTGCATATGTTGCTTCACAGGTGACTGAACTCCCATTCTTTGCATCAAAAGTACGACTTGGCCGAGTTGGGGTGGAGGAAATTCTTCCTCTTGGTCCCCTGAATGATTATGAGAGGGAGAGTTTGGAAAAGGCCAAGAAAGAGTTAGCAGCAAGCATTGAGAAGGGCATTTCTTTCATCAGAAAATGAGTAGTTGATGATAGTACGTCCCGAAAATAAATGGTTAGATTGTGCTGTGTCCATTGT…
Gma.153.1.S1_x_at	Y10491.1	At4g31940	1e-122	Metabolism	Cytochrome P450	CYP82C	ATCCACACAGATCATAACGTTTGGTCAAATCCATTAGAGTTTAAACCAGAAAGGTTCCTTACGACTGATAAAGATATAGACATGAAGGGTCAACATTTTCAGCTATTACCATTTGGAGGTGGTAGGAGGATTTGTCCTGGAATAAACTTAGGCCTTCAAACAGTTCGTTTGACACTTGCTAGTTTTTTGCATTCCTTTGAAATCTTAAATCCATCAACTGAGCCTCTTGATATGACTGAAGTCTTTAGAGCAACCAACACTAAAGCCACTCCACTTGAGATTCTTATTAAACCACGCCTATCTCCTAGTTGTTATGAAAGTATCTAATATTTAATTATGTGTTAGTTGTGTGAACCTGCTGTCTGTATTTTTTATTTTTAAACTATATGTAATCTGTTT…
Gma.13487.1.S1_x_at	BG045417	At3g14390	1e-128	Metabolism			TGATGCTTACCAGCATATAGAGCTGGTTTCCCCTGCCCCNTCAAATGCTGANACANNAACTTTTGATGTGGTTGGCCCTGTCTGTGAGTCTGCAGATTTCTTAGGAAAAGGAAGAGAACTNCCTACTCCAGCCAAGGGTACTGGTTTGGTTGTTCATGATGCTGGTGCTTATTGCATGAGCATGGCATCAACCTACAATCTNAAGATGCGGCCTCCTGAGTATTGGGTTGAAGATGATGGATCAGTGAGCAAAATAAGNCATGGAGAGACTTTTGAAGANCACATTCGGTTTTTTGAGGGGCTTTGANNNNNTNATTTATNTTGTANGAAAGAAGGNTGGAGAATTNTTNTGTANTTGGAGTTTGAATCTTTCCTNGTCAATGAATGCATGACTCTTAG…
Gma.1370.1.S1_at	BQ079614	At2g15230	1e-132	Metabolism			GATGATCCGCAAAGGTACCTACTCCAAGTATGATTATGGAAAGCTAAAAAATCTGATAGAGTACGGCAAGTTCAATCCACCAAAGTTCGANCTTAGTCGCATACCCAAATCATTGCCTCTGTGGATGGCNTANGGTGGAAATGATGCTNTGGCAGATATAACTGATTTCCAGCACACACTCAAGGAATTGCCATCCNCACCGGAAGTGGTTTATCTTGAAAACTATGGTCATGTTGACTTCATTTTAAGCTTGCAAGCAAAACAAGATCTTTATGACCCTATGATTAGTTTTTTCAAGTCATCCGGAAAATTTAGTAGTGTGTAAATTTCCTTCATTCCGGTATGATGGATGCAATACAATGGTCTACGTGTTTATATATTACTGCACTTTCTGTAAAG…
Gma.1430.2.S1_a_at	BF068964	At3g22850	2e-97	Metabolism			GCATTTGTTGCTGCGGATGCTGATGGGAGTGTTCCCTTTGTCTGGGGAACTGATGCTGATGGAAATCTCGTTTTCTCAGATGAGACAGAGATCGTAACTAAGAGCTGTGGGAAATCTTACGCACCATTCCCCAAAGGATTTTTCTTTTCAACATCCGGAGGTTTGAGCAGTTTTGAGCATCCACTGAATGAGGTGAAGCCTGTACCAAGGGTTGNNAGTTCCGGACAGGTGTGTGGTGCAACTTTCAAGGTGGATGCTGAGGCTAAGAAGGAAGCAACTGGCATGCCAAGGGTTGGGAGTGCTGCTAACTGGTCAAATAATATCTGATTGCGACTCTATTCTGTTTGAATTATGGGCTTTTATTTTATCATAGCTGCACTCGGC
Gma.14345.1.S1_s_at	BU544949	At1g31070	1e-105	Metabolism			AGGAATTTGCACCAGTGAAAAATGCAAATGGATCCAATGTTGACACTCCAGACAGTGCGAAACTACTTGTTCTTCGACTCCATACTCGTTGGGTAGTTGCTGCAGGTGGCTTCTTAACACATTCAGTGCCCTTATATGCAACAGGT
Gma.1445.1.S1_a_at	BQ454241	At1g80820	2e-88	Metabolism			GATGAAAAGAATCCGAGAGCAAAACCCTACACTTTTTCA
Gma.1445.1.S1_at	BQ454241	At1g80820	2e-88	Metabolism			ACAGGCGTATGTTCATGTTAGGGACGTGGCATTGGCCCACATACTTGTTTATGAGAAGCCTTCTGCCTCTGGTAGATACATATGTGCCGAAAGCTCTCTCCACCGTGGAGAATTAGTTGAAATTCTCGCCAAGTATTTCCCCGACTACCCAGTTCCCACCAAGTGTTCAGATGAAAAGAATCCGAGAGCAAAACCCTACACTTTTTCAAATCAAAAACTGAAAGATTTGGGATTGGAATTCACCCCAGTGAGTCAGTGTTTATATGAAGCCGTCAAGAACCTGCAGGAGAAAGGGCACCTTCCTGTTCCTGCAAGGCAGCAGGAAGATTCAACTACTGTGAAACCTTAAACGAGCTATCCCTTTTTATCTAATTTGTCAACAAACAAGAAGCTGCAGCT…
Gma.1445.2.S1_at	BQ610936	At1g15950	1e-135	Metabolism			TGAGTCAGTGTCTATATGAAACAGTGAAGAGCCTGCAGGAGAAAGGCCACCTTCCAGTTCCTGCAAAGCAGCAGGAAGAAGATTCAACTACCGTGAAATCCTAAATGAGCAGCTAGTTGTCCACTAAGGCAAGAAGCTGCAGCTTGTGGCAATCTGTGCTCATCTTATATATTATAATAGAGAATCCTACATTAGAAGACTGCTGTATTTGGATTTTGTTAAAAAGACATCAACTAAATTGTTGCCGTGTATGAACTTATAA
Gma.11275.1.S1_at	CD407624	At5g64370	0	Metabolism			CCCGCAATAGGGACGGCTTGTTAGTAACAGACATGGATCTTAACCTGTGCAGGCAGGTGAAAGACAAGTGGGGTTTCAGAATGACTTCACGGTACGAGTTATATGCCGACACACTCGCCCGCTATGTGAAACCAGACTTTGAGCCACAAGTCACCAGTGACCCCTTGTTGCATAGGAAGTCCTTGTGAACTATGCTCTCAAGTGTTGGTGTTAATATGTGTTCATTGCTTGTGGTTCAGATTCTGGTCTGTCGTGGGATGGCCAGTGGAAACAACCTTAAATAAAGTTCTTTCATGTTGAGTACATGTTCATGTATTAAATTCTGTTGTCAATGGTTCACCGTCATGGTTGGTTGATTTGGTCCCATTTTACATG
Gma.1137.1.S1_a_at	BF067710	At5g48930	0	Metabolism			AGCAGAATCCACAATGCATTGTTACGAATGGACAACGATTATTTGAGATCGGCTCTTGACTATCTAGAACTGCAACCCGATCTAAAAGCGCTGGTTCGTGGGGCTCATACTTTCAAGTGTCCAAACCTTGGTATCACTAGCTGGACTAGGCTTCCAATCCATGATGCTGACTTTGGTTGGGGAAGGCCAATATTCATGGGACCTGGTGGAATTGCATACGAGGGGCTATCTTTCATAATTCCAAGCTCAACCAATGATGGGAGCCTATCTGTGGCCATAGCTCTTCAGCCTGACCATATGAAGCTGTTTAAGGATTTCTTGTATGACATTTGAAGAATCATTGCCTTCAAGCCATATGGAACGCCACAATGTTTCTAGGTGGGGTTTTCTTTCCCCTCG…
Gma.1137.1.S1_x_at	BF067710	At5g48930	0	Metabolism			GAACTGCAACCCGATCTAAAAGCGCTGGTTCGTGGGGCTCATACTTTCAAGTGTCCAAACCTTGGTATCACTAGCTGGACTAGGCTTCCAATCCATGATGCTGACTTTGGTTGGGGAAGGCCAATATTCATGGGACCTGGTGGAATTGCATACGAGGGGCTATCTTTCATAATTCCAAGCTCAACCAATGATGGGAGCCTATCTGTGGCCATAGCTCTTCAGCCTGACCATATGAAGCTGTTTAAGGATTTCTTGTATGACATTTGAAGAATCATTGCCTTCAAGCCATATGGAACGCCACAATGTTTCTAGGTGGGGTTTTCTTTCCCCTCGTACCTTTGTTATCTGTCGATGCTTTTGACAAACGGTATGCAACTGTTAATGGGACTCCTTTCAGTT…
Gma.12012.1.S1_s_at	BU548282	At1g55740	1e-160	Metabolism			AAAGGATGCATCCATCCCAGTTACCTTGAAAACCAGAGAATATGAAGTTTTCACAATAGTTCCCGTGAAGGAATTGAGCAATGGTGTCGAATTTGCTCCTATTGGTTTAATAAAGATGTTCAATTCAGGAGGGGCTGTCAAAGAGTTTAATTGGGGATCTAATGAAAGTACAAATGTAGCCATGAAAGTCCGTGGTTGTGGCCAATTTGGTGCTTATTCATCAGCTCAGCCTAAGTTGATAACAGTTGACTCAGAAGAGGTAGAATTCAAGTATGAGGAAGAATCTGGATTGGTGACTATTGATTTGAGAGTACCTGAGAAAGAGTTATACCAATGGAGCATTTCTATTGATTTTTGAATCAGAGACTTTGTCTCAAGATGAAGGGGTTTAGAGTTATA…
Gma.1195.1.S1_s_at	AI442801	At3g27890	2e-61	Metabolism			GAAATTTCGGAGCTTCCCATGTTGAACACTGATCTTGAGATCAATGGGACCTACCCACCAATAGTTGAAGCTTTTCGTCAAAAGATTCTTCAAGCTGATAGTATTCTCTTTGCTTCTCCTGAATATAATTACTCTGTCACAGCTCTACTAAAGAATGCAATTGATTGGGCCTCTAGGCCCCCAAATGTTTGGGCTGGCAAAGCTGCTTCAATTGTAAGTGCCGGTGGGGACTTTGGTGGGGGAAGGTCACACTATCATCTTCGCCAAATTGGAGTGTACATTGATCTTCGTTTCATCAATAAACCAGAATTCTTCCTTCTTGCATTCAAACCACCACCAAAATTCAATGATGATGGTGACTTAATTGATGAAGAGGCCAAGGATAAGTTGAAGCAAGTT…
Gma.12152.1.S1_at	BG650241	At1g74260	1e-125	Metabolism	Purine Base Biosynthesis		GGGTGGCAGCTATTTGTTCCCCAGATGGGAGGCATCTTGCCATGATGCCTCATCCTGAGCGTTGCTTCTTAATGTGGCAGTTCCCATGGTATCCAAAGCAGTGGGATGTGGAGAAGAAGGGGCCTAGTCCTTGGTTACGCATGTTCCAGAATGCAAGAGAGTGGTGTTCCTGAAATGATCAAATGTTTTTCTCATCTTGTCTTATCTTTTTCTTTNCTTTTTCCNNATATAAAGCACTTGTCCTTGCTTTAGTTGACAACTTATCCATGTCCTCCTTCAATAATTAATGGACAGGTTACTCATCAATAAC
Gma.12181.1.S1_s_at	BG041826	At5g18800	5e-23	Metabolism			GGCCTTCTGAAGGATCTGCACCAAAAGTGCACAAAGGAGATGGATGANTATGTTGGCTGCATGTACTACCATACAAATGAATTTGACTTGTGTCGCAAAGAGCAGCAAGCATTNGAGAAAAAGTGNTCTTTGGAATGAAATTATGCACTGCTGTTGTCGAAAATAATATCACAGGCAATTTGGAGTGAGCAAATGAGCCTGTTTTCCAAAAATTCATTG
Gma.1248.1.S1_s_at	AJ518837.1	At2g32150	2e-86	Metabolism			AAAGGAGCTGACTATGCTGTGGAGAGTGTGCATAACTTGGCACAAGTGATCCCAGAGATATGGGCAAACGAAATGGACGGTGGTGATCCAACGATGACACGTTCGAAGAGTGAATTGGAGGCCGTACTCGCTTGTGCTCTGGTTGGAGCTTGAAAATTGACGTTGTACAAAAATGTACATTCCCAACCAACCCAACTATCTATGCAATTAAAAATAATAGTACAGTAGTATAAATAGTATCAGACCACCAATAGCGAAGACAATAACAGTAAGTAACGTGGACCCCCTAAGCAATTATTTGCGACATGTGAATATTGTAAG
Gma.12207.1.S1_at	U43683.1	At5g13710	1e-167	Metabolism			TGGGCTACCTGACATTCGATTGACTGCTAAGTGTCTTGAAGCTCTGAAGCAAGCAGGTTTTGAGGTAATATGGGAGAAAGATCTAGCAGTGGACTCTCCTCTTCCTTGGTATTTGCCTTTAGACAAAAGTCACTTCTCACTGAGTAGCTTCCGTCTAACTGCTGTCGGGCGACTTTTCACCAAAAACATGGTCAAGGTTCTGGAGTATGTTGGACTGGCTCCAAAGGGTAGTCTAAGGGTTCAAGACTTCCTGGAGAAGGCTGCAGAGGGACTAGTTGAAGGAGGGAAGAGAGAGATTTTCACACCAATGTACTTCTTCCTGGCNCGGAAGCCTGATTNAGACAGGAACTAAGCTGGNTGTACAAATAGGTTGCTGTTTTCATCAGTTACNGTGATTCT…
Gma.1179.1.S1_at	AY096000.1	At3g16150	1e-159	Metabolism			GCGCATCGGTGATTCGCCGCTGATAGGCGCCGGGACCTACGCGTGCGACGTGTGCGGCGTATCGTGCACGGGTGAAGGCGAGGCCATCATACGTGGCACGCTGGCGCGTGAGGTGGCAGCGGTGATGGAATACAAAGGCTTGAAGCTTCAAGAAGCCGTGGATTTTGTGATCAAGCACCGTCTCGATGAAGGGATGGCTGGTCTCATTGCTGTGTCCAACGCTGGGGAAGTGGCTTATGGTTTCAATTGCAATGGCATGTTTAGGGGCTGTGCCACTGAAAATGGCTTCATGGAGGTCGGAATCTGGGAATAGCTTCATTATTTTCCTTCATGGTTNGTTTCGATGCAACTTTTGGATTTCTGTACCATGTTCCACTGTAGTGTAGGGTCTTTCTGCTG…
Gma.1314.1.S1_at	U63726.1	At1g78660	1e-101	Metabolism			GTCCTGCACAATCATCGTTATGCCATATCCCCACGCAAGCTTCAATATAATACCAAGTTATCTGACTTTTTTGAGATTCTGGCAACATCTGAGGATAGAGATGGAAAGACTTTCGTTTCCACAGCACGTGGTAGGAAATATCCCGTGACTGTCAACCTATGGCAACCAGAGAAAAATGCTTTTGAATGGGCTACATCTTTGAAAGCCCCTCACACAGAGGATGCAATTCGGGTTACTCAGTCCACAGCAAACTTTTTCATAAGTGAAGCTAGGAAATCCACAAACACACCTGATGCTCAAAAAGTGCGAGATAATCTCATCTACAATTACAAACCTACTTTTGGTGGAACGGCTGGGAAAGGATATGATCAAGTGTATCTCTTTGAATAATTCTATCTG…
Gma.1269.1.S1_at	AW309671	At1g51410	1e-135	Metabolism			GACCTTGGGGATTGAATTTATTCCTTTGGAAGTGAGTCTTAGAGAGACAGTGGAAACTTTGAAAGAAAAGAACTTTGCCAACTTTTAGTCTCTGATATCTCTGCTTGATCAGGAGTGAACACGTTGAGAATCTCAACGGTGTTTCGNTTGTGGTTCTGGTTTTAGAATCTCATTGCTTGAAAATAAACTATTGTACTGAAATGTCAAGCTTGTGTGTTGTAATAAAACAAGATTAATTGTTGGTTTTATTTCGGTTTGTACTCATGAAGGAAACCAACGTGTGGTATA
Gma.10876.1.S1_at	CD391960	At5g22740	0	Metabolism			CAGACCTTAACATTCTCAATTGTAGGATTTGGCTACGTTGGCACCATCGTGTAAACCTCNTTGAGCCAAATTTCTCAAGTTACTTAAGTTTCANCAATGTTGTGTCCATATTTTTCTAGTTTCTCCTAAAAAAAANTACATCAANNGAGGCTGATTTCTTCAAGCAACAAACNCNGTACCAAANTCATCTACAGCTAGTTTAGCTCAAATNATTTTCAATTCGGAAAGAAAAAANNNGTCCTTTCCAANATTTCATTGNCATCCATCATCAAGAAGATACAAATCATCACAGNCAAAGTGCTGTTATTACTAGAATTGCATTANACAGGCTTAAGNGCAGCTATGAAGANGTACCNAAAANNNAAAGTGGTTAAATTAGAGCCTTAGANATNAAGTAGA…
Gma.10759.1.S1_at	BE822425	At4g23850	1e-108	Metabolism			ATATTTACGGTCAAGTTTCTTCTATTGAATCTATATGGGTTTATGGAAACAGTTTTGAGGCCTTCCTTGTGGCTGTTGTTAACCCCAGTAAGCAAGCACTTGAACATTGGGCCCAAGAAAATGGTATATCCATGGACTTCAATTCTCTCTGTGAAGATGCTCGAGCAAAAAGTTACATAATTGAAGAGCTCTCAAAGATTGCGAAGGAAAAGAAGTTGAAAGGTTTTGAGTTTATAAAAGCAGTTCACCTTGACTCAATTCCATTTGACATGGAACGTGACCTTATCACTCCAACATACAAGAAGAAGAGGCCACAGTTGCTTAAATACTATCAGAATGCCATTGACAACATGTATAAGAGTGGAAGTAAACCCAGTGCCTGAGACCTGATTTGGGAGA…
Gma.10749.1.S1_at	AW349258	At3g27570	3e-35	Metabolism			GAAAAACAATCACGTTGAAAGCGACAATCTGAGCAGCAAAGAAAACGTGGGTGGTTGTTGCCAGGGTGTTAATGGAGTTTCTTGTTGCAGAAGTGCAAGTCTTGAGCAAAACAAGGAGATTGAAGAAACACCTGAAACACATAAGAAGGGGAGCNAAATCTGTTCGAATTGGCCTCAACTGCAGCAGCGTGATATTCGCACAGCTGTTGGTGTGCTTGGAGCTGTAGCAGTTGTTGTTGTGGCTTACAAACTNTACAGAAGGGCAGCGTAGGTTACTCTCTAAACCATGTTTTTTAGGTTGCTTGGAAGTTTATTACCCAATATTTTTTTTTGTCGAGGTTCAATAAATTTAAGAAACAATCACGAAAACTACTATTACCAAGTCATACATAGACACTT…
Gma.1079.1.S1_s_at	AW350347	At4g13940	0	Metabolism			AGTTTTGTGATGTCCTGCTCCTTCACCAACCAGGTCATTGCTCAGCTTGAGTTGTGGAAGGAGAAGAGTACCGGCAAGTACGAGAAGAAGGTTTACGTTTTGCCCAAGCACCTTGATGAGAAGGTGGCTGCACTTCACCTGGGCAAACTTGGAGCTAAGCTNACCNAGCTTAGCNNGNCCCAGGCTGATTACATCAGTGTGCCTGTTGAGGGTCCATACAAGCCTGCTCACTACAGGTACTAAGTGATTGAGATGATCAACTGAAAAGTGAGTGAGGGAAAGACAAAAATCGGTTTTATCAATCGGATTTGATTGTTTAATTTTCCTTTTTTTGATTTTTGGTGTTAGACTTTTCAGATTTGTGGTAGAAGAATTGTAGCCNNNNNNATTTTTATTTCT…
Gma.10794.1.S1_at	BU577866	At5g66680	1e-157	Metabolism			GATAATTTGGAATACTCTGTTGAAGTTTATGAGTGGTCTGGGACANCATGGGAACCTTANGTAGCTGATGATGTTCAAGTGCAATTTTACATGATGAGCCCCTATGTCTTGAAGACTTTATCAACTGANGGCAAGGGCCNTTATTTCACATCATTTAAGGTTCCAGATGTCTATGGGGTTTTCCAATTCAAAGTTGAGTACGAAAAACTTGGATATACAAGCTTATCTTTATCAAAGCAGATTCCTGTTCGTCCCTTTAGACACAATGAATATGAAAGATTTATACCAGCAGCNTATCCCTATTATGGAGCANCATTTTCAATGATGGNNGGNTTCTTCATCTTCACNGCAGTTCATCTATACAGCAAGTAGA
Gma.10801.1.S1_at	AW309829	At3g54020	1e-108	Metabolism			TTGAATGGGAATTCTGGAGACCCTGNAGATTGGAGGCAGAGAACTCAAGTGAATGGCAAGATCATGGAAGATGGCAATACACTCCATGCAGANTCTGCCATGAATGGTGCATAGATATAGGAGCCTCTGCTGTATAAATTGGATCCACTGCAAAGATTGCTGCTGATGGAAAAGCTGCAACCAACCTTCAATTTGAAGGATTTGTTGTCTGAAACATTCACCTGTTAATTCAAATTAGTACGCCCCAATTTGTACTAGTGAAATTGAAACTGGGTTGTGCATTTCAACATTTTGCAGCTCAGATTCCATGTCATGGTTAAATTATCTATACACCATCAGCATGTGCCATAGAAAAATTTCCATTNCCTCTTTTACCNTACATCATTGATCCCACATGCA…
Gma.10216.1.S1_at	BI969369	At5g54160	1e-68	Metabolism			GGTGTTAATTTTGACTTGCCACATGTCATAGAGCATGCTCCTACATACCCCGGTATCGAACATGTAGGAGGAGATATGTTTGAGAGTGTTCCCAACGGAGACGNCATTTTTATGAAGTGGATACTTCACGATTGGAGTGATGAACAATGCTTGAAGTTGTTGAAGAATTGTCATAAAGCTATTCCTAGTGATGGAAAAGTGATTGTTGTGGACTTAATTCTTCCCATTTTGCCCGAGAGCACAGTTACTGCTAAGAGTGGTTTCCAAGCTGACCTCTTAATGATGACTCAAAACTCAGGAGGAAAAGAGAGAACCCAACATGAATTCATGGAATTGGCATTAAGTTCTGGATTCAGTGGCATCAAAATCGTTTGCAGTGTCTCTGGCTTCTGGGTTATG…
Gma.10016.1.S1_at	CA852632	At1g59900	1e-106	Metabolism			AAGAAGTTGACGAAGCCATTGCTAAAGCAAAGGAGAGTCCAATGCCAGATCCATCTGATCTATTTACCAATGTCTATGTTAAAGGTTACGGAGTTGAGACATTTGGTGCTGATAGGAAAGAAGTGAGAGCTACTTTACCATAATTCAGAACTTTGTCCTTTGAATATCTTGCCACCTTGTCGTAGCAGACTCTTCAAAATAGTGAAGAATAAAAGGTTCTACAGAGGGTCATCTCTCTCCCCTATTCGTTGAGTTTCTGCCCGCGTGTATAGTGTGAATTTATTCATATGCTTGGTTAGCAATGGGGCGGGGTTTGTTATTTTTTTGTCATGTAATATTTGCGGATCTAACAGCCAAAGCATCATTGTGATTGATGCAACTGGGGTGTTCTGCAAATTT…
Gma.10695.1.S1_at	CD394954	At4g11820	2e-58	Metabolism	Lipid Biosynthesis/Metabolism		CAGTCAACATCCGTTTAGCTTGTCAAACANTGNCTAGAGTGATGNATGTCGATGGAAAATTGAAGTCAAGACATGAGTTTCCCCCNGNAGGAGTTTGTTGAAAACNTGAAGNTAATGGAGCATAGNTATGGTGNNAAGGAATTTGTGACAAGCAAGGACANTAGCCTTTTATCTCCNGGCACATTCTANCTCACTGAAGTTGACTCCATGTATCGGAGATTCTATTCAAAGAAAACTAAAGANAGCAGTTTGACTCNCGCTGAGAACGGTGTGATTGCTAATGGCGTTGCTAATGGCNNNNNNNNNNNNCACTGATGTTGAGCATGTACAATCAGCAGTCAACTTCGCCTAGAATGAGGAAGGGTATTGTTATTTGCGAAGTTCTGTTGGTAAATTGTT…
Gma.10721.1.S1_s_at	AF074940.1	At3g17240	0	Metabolism			TTGAATACCGTGTTGGCAAGTTCCCNTTCNTGGCTAATAGCAGAGCTAAGGCAATTGACAATGCTGAAGGACTGGTGAAGATATTGGCTGAAAANGAGACAGACAAGATATTGGGAGTGCACATTATGGCACCCAATGCAGGAGAGCTTATTCATGAAGCAGCAATAGCACTACAGTATGATGCATCTAGTGAGGACATTGCACGTGTGTGCCATGCACATCCAACAATGAGCGAGGCTGTGAAAGAAGCCGCAATGGCCACTTATGACAAGCCCATTCACATTTAAAAGGAGCCGGTTGCTACTTTCTTCTTGTTTTCATTTTTGTCCAAGAATTTTACAATGACTTGGAGATGATACATCCTGTGTTAAATTTAGATTCAGGTTTTTAAATGCAAAT…
Gma.10722.1.S1_at	BE823336	At3g55440	7e-84	Metabolism			CTGCCTTTCAAGCTGCTTCGGAAATTGCTGTTTTTGAGTTTT
Gma.10690.2.S1_s_at	AW394305	At5g66120	2e-62	Metabolism			GGTAATGGCTGTTGACATGTCATATCGCCTAGGTTGGATTGATGATTCTCTAGTGAAGAGAGTTGGAGATATTTTAAAACAGGCTAAGTTACCNNCAGCCCCTCCTGAGACCGTGACTGTGGACATGTTTAAATCTGTCATGGCAGTGGATAAGAAGGTAGCAGATGGGTTGCTAAGGCTTATCCTTCTAAAGGGNCCTCTAGGCAATTGNGTTTTCACAGGGGATTATGACAGAAAGGCTCTAGACNATACGCTTCGTGCATTCTGTAAATCCTGATCTTTGTGCTCCATGTTTCTATTGCAGCTTTATCCAATTCCTTTTAG
Gma.10969.3.S1_x_at	CD396552	At3g22400	1e-119	Metabolism			ATTGGACTTCTGATGCTGGTCCACTAGAGGCCTTCAAGAGGTTTGGAAAGAAGCTTCAAGAGATTGAACAAAAGCTTATACAGAAGAACAAGGACGAGACGTTGAGAAACCGCAGTGGGCCGGCTAAAATGCCTTACACTTTGCTCTATCCTTCTAGTGAGGAGGGATTGACTTTCAGAGGAATTCCCAACAGTATCTCCATCTAGGGGCTCTATGGTTGTTGCAGTACTTTCCCTGGTTTTCAATAAAAGTGAATAGAAGGAATATGATTCCTTCATCTACCTATGTATGGTTAAGTTATGTATTTGGGGTGATTGAATGTTCTCGTGTTTGCTGTTAAGTGTTAATGAAGAAATTCTGTTTGTATAAATTGCTGTTAAGTGTTCTCGCGCATGTTTC…
Gma.11052.1.S1_at	AI795084	At3g23490	5e-57	Metabolism			GCCATGCATATTTATACAATGTTTTATGGCTTTGGATATTTCATGACACTTGCACCATGTATTTTAATGCCAGTTAATTATAAGATGGAGAAGCTTGTATTGTGCTTGGTTGAGCAAGTCAAATAA
Gma.11028.1.S1_s_at	BE823084	At5g14780	1e-121	Metabolism			GATTGTTAACAATGCTCGAGGGGCAATTGCGGACACNCAAGCAATTGCNGATGCTTGCTCCAGTGGCCACGTTGCAGGTTATAGTGGTGATGTTTGGTTCCCACANCCAGCTCCAAAGGATCATCCATGGCGNTACATGCCAAACCATGCCATGACTCCTCATATTTCTGGNACCACCATNGATGCACAGTTACGTTATGCTGCTGGNGTCAAAGACATGCTTGATAGGCACTTCAAGGGTGAAGACTTTCCAGAACAAAACTACATTG
Gma.11028.2.S1_s_at	CA782711	At5g14780	1e-169	Metabolism			GGGCAATTATGGACACCCAAGCAATTGCTGATGCTTGCTCTAGTGGCCACGTTGCAGGCTATGGTGGTGATGTTTGGCCCATACAACCAGNTCCAAAGGACCATCCATGGCGNTACATGCCAAACCATGCCATGACTCCTCATATTTCTGGCACCACCATTGATGCACAGTTACGTTATGCTGCTGGTGTCAAAGACATGCTTGATAGGCACTTCAAGGGTGAAGACTTTCCAGAACAAAACTACATTGTGAAGGAGGGTCAACTTGCAAGCCAGTATCGTTGAAGTGATGCTTTTGTTGAATTTGAATCTTCCATTTTAAAGTTCCACGGATTAGCAAATAAAGATCTATATAGAGGGCACTCTAATTATATAATGTACTTGCTTTGTTGAATTTGAA…
Gma.1111.1.S1_x_at	AW203448	At1g59900	1e-117	Metabolism			GGAAAGTCAAATGCCAGAGCCATCTGATTTATTTACCAATGTATATGTAAAAGGCTTNGGTGTCGAGGCTTGTGGCGCNGATAGGAAAGAANTTAGNGCTANTTTGCCCTGATGGAAAACTTTTCCTTTNNNTTNNTTNNCCTTAGTTTTGGACNNATCAAAATAATGAAGAATAAAAGGTTCAGAAGATCATCTCTGCNTATTTGTTGAGCTTTCCCCNAATTGTATATGAAATTGATTCTTCANTAGCAATGNGGCNGAAATTAATGNTTTGCCATNTAATTTTGGAGGATCTAACACTCATATGACCTCAATTGATTNNGCANGCAACTAGTNTCCTGCAAATTTGGAGGATTTCGTTATGCAAAACCTCCATGNTTGGCAAAATTTTGCCATTAT…
Gma.11082.2.A1_s_at	AW310165		0.006	Metabolism			TCATTTTCTCTTCATCTAGATTTTTCATGACAGATATTCCTTTCATTAAAACAGGTTGCGTGAATGGTGGAGTTCTCAAATGTTCNACTGTCTTTTCTAGATCTTTGTGTGTTTCTTGTCACG
Gma.11261.2.S1_s_at	AW318293	At3g06580	0	Metabolism			TTTGTCGTAACAATGGTGCTCTTGGGGCAAGGCTTACTGGAGCTGGATGGGGTGGTTGTGCTGTTGCTTTGGTGAAAGAGAGCATAGTTCCACAATTTATCCTTAATTTGAAGGAATGTTTCTACCAGTCTAGAATAGACAAGGGCGTTATTAAGAAGAACGATCTTGGCCTTTATGTATTTGCTTCCAAGCCATCAAGTGGTGCTGCTATCTTCAAGTTTTAGTGTTCTTTAACCCGCTTCCCTTCTTATGGCTGCGACTTTCTTCCCCTGAGATCTAGACACAGATTAGATGCAATTTCTGATGGAGTAAGATTAAATGGTACCATATTTTCTTTGTTAAATTATTTTAGTTGATACGATGAAAGCAAATAATGATAATATTGCCGAACGGCTTTTA…
Gma.11164.1.S1_at	AW350722	At2g33150	0	Metabolism	Amino Acid Biosynthesis/Metabolism	Isoleucine Catabolism	TGCTGCAATTCCTGTTGCTGTTAAGGCTGCAGGTCTAGAGCTTGATGATATTGATCTTTTTGAAATAAATGAGGCATTTGCCTCCCAGTTCGTGTATTGCCGTAACAAGCTAGGGCTTGATCCAGAAAAGATCAATGTTAATGGAGGTGCAATGGCAATTGGGCATCCTCTGGGTTCAACAGGTGCTCGATGTGTTGCAACTCTGTTGCATGAAATGAAGAAACGTGGCAGGGACTGTCGATTTGGAGTTATATCTATGTGCATAGGTACTGGAATGGGGGCAGCTGCTGTTTTTGAGAGTGGTGATTGTGCTGATGAGCTATGCAATGCCCGGAAAGTGGATGACCTTCTTTTATCCAAGGATGCTCGCTTGAAATAGTTACTTCATACTCACTATAT…
Gma.11166.1.S1_x_at	AW705829	At1g55020	1e-156	Metabolism			AATCCAAATTGGACTGATGACACAAAGGCAATTCAAGCCTTTAAGAAGTTTGGAAACAAGCTGAAGGAAATTGAGGACAAAATCTCAGGGAGGAACAAGAATTCAAGCCTTAGGAACCGTAATGGACCGGCGCAGATGCCCTACACTGTGCTTCTTCCTACCAGTGGGGAAGGCCTTACTTTCAGAGGAATTCCCAACAGCATCTCTATCTAATGAGAGTGTGTGGTGTGTGGTGTGTGGTTTTCTTTCCTTCCAACGTACCTCTCATTGACAAATAAACGTGCAAACTTATGTGTGCATAATTTTCTTATGTATGCTTAAGTTTTGTAATTGGATGCTATCTAGTTTTTCATATCTAATAGGGTGTTGTGTCAGTTTTTAT
Gma.11126.1.S1_at	AI960156	At5g11670	1e-160	Metabolism			CAAGGGCAAAGTGTACTATTCTGGCCAGGCCAACAATGCNTACATNTTNCCCNGGNCTTTGGTCTNGGGNTTGGTAATCTCAGGAGCAATCAGAGTGCATGA
Gma.11126.1.S1_x_at	AI960156	At5g11670	1e-160	Metabolism			AAGTCCATTTGATCCTGTAGAATACAAGGGCAAAGTGTACTATTCTGGCCAGGCCAACAATGCNTACATNTTNCCCNGGNCTTTGGTCTNGGGNTTGGTAATCTCAGGAGCAATCAGAGTGCATGANNGATATGCTTCTAGCAGCTTCGGAAGCCTTGGCTAAACTNGTGNCCNANGAGAACTACGAAAAGGGCTTGATTTATCCACCATTCTCTAACATCAGANAAATTTCAGCTAACATAGCNGCAAGTGTAGCTGNCAAGGCATATGAGCTAGGCTTGGCTAC
Gma.11237.1.S1_a_at	BU548971		0	No Homology to Known Proteins			GGAGTTTAAGCCCAATCCACTAATCTTTAGGAGGGATAGTGTTTTAATTTCCCGCTTAGCATAAGTAGTACATTTCATCATCATCTTGAGGACTACGTCAATGGATGTGGAACTCAAAACACTTGCATGGAACCCTGGGAGATATTTTGGTTCCCTTGGGTACTTCACTTACTCACCAACCATGGTTAGGACATAGGTGAATCTCATCACTCTCTATCTCTCTTCTCCCTGCTTTCTGTCTGCCAACTTTTACATCGAGATGGACCTTGATACTCTATTAATTATATGTTTAATTAAGCCTATATGGTTTGGATTGTAATTAGGAATACTAAAGTAGGAGGATTTCATTCTCTGTCCATGCTGGATGAGAATGGATTTGCTACTCATTCTACTATGCCT…
Gma.11229.1.S1_s_at	AI443813		0	No Homology to Known Proteins			AGGGTACTCAAAGATTTTTGCAACGCTTGGANTTGTATGCAAGTGTTGTGATGGGGTTGGAGGNGCCTGCACTAGTANATGGACAGAATCTTGCAATAACNTNCANTGTTTNCCTTGGAAATCACACTAGTTAATTATTTTCTGTATCTTTCCTTGT
Gma.11082.1.S1_at	BQ612677		0	No Homology to Known Proteins			TTATTTATCTACTTGCTAATCCTGTATTCAGCTTTGGAATAGAGTTGCAAAAAAATGATTTTAATAAAATTAAGAGAGAAGCTATGTTAAAAAAGCATACTTTTCATGGATAAAATATGGAAATTAATTTTGAACCGTAGATCTAATTGGCCTTAATATAA
Gma.11211.1.S1_s_at	AI442578		0	No Homology to Known Proteins			ATGGCCTCCGTTCAGTGCCACAAAACCTGCAAAGTGAGCTGCCAACAGGAAAACCAGCACGCCTCGTTTGGGCAGAAAGTTTCTGACTTGTTCAAAGGGCATCAACATAATGACCACAGCTCCAATTATGCCACCCAAACCAAAGTGCTTTCCCAGTCAGGGTCAGGGTTAGGCCCCTTCACCACCAAAACTCAAACACAATGCGGTTGCCCCCAAACACATCTCAGTACCACTCATGGCTCCAACACAAAAGGCCATGGCCATGGCCAAGGGAGAATTAAGAGGGAGCACAAGAGAGGGATGCTGCAGAACATCAAGGATCGCTTATCAGGTGACACCAGCAGCGACAGCNNNNNNNNNGAGAGCGACAACGAAACTTGCCACAAG
Gma.11054.1.A1_s_at	BI970377		0	No Homology to Known Proteins			AGGTTGTCAGTCTCATTTGTCTTGCTTCTTATAGAGTGCAAGGCATAATTTTTCACAATTTTGTAATAATAGTATGATATGGTTGAACATAATCTGCTGTACTTGTAATGGTTTTAGGTCATATAGTAATAGATCAAAGGATTTGGTCAGTTATGTTCACAAAATCCCTGTATTCTCGTTACTTGTATCATAGCC
Gma.10969.4.S1_at	BG508006		0	No Homology to Known Proteins			TGGAAAGTTTTTTGCTTAAAGAGAGTGTTGCCTCGTGCCGAATTCGGCACGAGGGATAATTTTAGGTTTGGAATATGCGTTGTGGTTTGAGCATCTGTTACTGTTATGGTTGGGTTTTTGACATCTGATAATGAATCTGTGTACTGGAAGGATTACTGGGTCTTGGTCATCCAGATTGAAATACCTGAAAATCCTTGCTACCTATAAAA
Gma.11007.1.S1_a_at	CA850791		0	No Homology to Known Proteins			CTTGTCTAATAAGGGTATTTGTGTCCTCCGAGACAGCAAAATTTTATTTATGTATGTGATGGAATTTGTATCTTGTTGATCTTTTTTTAACTTTGGATAGGGAATCAATCACATGGA
Gma.11007.1.S1_at	CA850791		0	No Homology to Known Proteins			TCTCTGATTGAAGTTATGGATTTGGGCTTATCCTCTCTGTCCTTTGTCATTTTCTTTACTAATTTAATTTTGTACTTGTCTAATAAGGGTATTTGTGTCCTCCGAGACAGCAAAATTTTATTTATGTATGTGATGGAATTTGTATCTTGTTGATCTTTTTTTAACTTTGGATAGGGAATCAATCACATGGACCATTGTTGCAATTAGAAACCATAACCCCTCCTAAGTTTTATCGTTNTCAATCAAGAATTTGATCAGTTATTAGTAT
Gma.11007.1.S1_x_at	CA850791		0	No Homology to Known Proteins			TCTCTGATTGAAGTTATGGATTTGGGCTTATCCTCTCTGTCCTTTGTCATTTTCTTTACTAATTTAATTTTGTACTTGTCTAATAAGGGTATTTGTGTCCTCCGAGACAGCAAAATTTTATTTATGTATGTGATGGAATTTGTATCTTGTTGATCTTTTTTTAACTTTGGATAGGGAATCAATCACATGGACCATTGTTGCAATTAGAAACCATAACCCCTCCTAAGTTTTATCGTTNTCAATCAAGAATTTGATCAGTTATTAGTAT
Gma.10920.1.S1_at	BQ612383		0	No Homology to Known Proteins			GTGACTGGATGTACATCGAACCCGAATATACCTTGCTATCCGCCACCAAAACGAGCATGTCCTATATATATTCGTAATTGCTGACGAAAATTATATGTTTCTGGACTCTAAAGTTTCACTCAAATCGAGGGGAGAAGCAATTAATGTCATGCTGCTATATATATATATATATAGTTTTTATTTGGTGCCTCATCTTTTTAACACTATTCCTGTGTTAAAACTCGGTGGTGTCACATCTTTGCTTTAAAATTCCGTGTTCTTTTCCAGTTTGCAGTTGCAATAATCTTCTAATGTTGTACTGAGGCAAAGGCTTGCCCTTTTAGCCACTCAATAAATA
Gma.10706.2.S1_at	BI968467		0	No Homology to Known Proteins			ACTCCCTAAGTTGCCTCCACTCAAGCCACTTCCACC
Gma.1.1.S1_at	U36442.1		0	No Homology to Known Proteins			TTCCTAACAGCATCTCCATCTAAAGAGGTTTATGGTTGTGTTGCAATTTAAATAAAAGATGAGGTGTAATTCCTTCATTCCCGTGTATAGTTATTATGTATGTTTGGATGCTTTGATGTTTTGCTTTAATAAATTTTCTCTGTTTCTACTTTGTACCATGCTAGATTTACAATATGA
Gma.10015.1.S1_at	BI469759		0	No Homology to Known Proteins			GACTTTGGGAGTTGAGTGTTTTCACTCTGCTCGGTGTGGGATCATAACTGCGTGACGACCACGTGGGGATGAATACTTCAGTCGTGAATGAAGAAACAGTTGATGTTGGTTAAGGCCCACGGAGGATTCGAGTTCAAGATGGATTCAATGTGTCCCCTAACAACATATTCTATGTTTCATTTTTGTTTTGTTATTTTTTATTCTTTTGCGGGGAAGCGTAAGTTTAGATTTTTATATTCTGTCTTTCACAGGAGAAATTTTGATGTAGTAGTATATACTTTTACGATATCAAGCGTGGCNAATTCCATTTAGCCAGCGAACATAATATTTCTAGCATCTGCAGGTAAT
Gma.10377.1.A1_s_at	CD409364		0	No Homology to Known Proteins			GAAAAATCTGCTGTTTATCTTCATTTCCTTTTGGATTTTGGGCTTGTATAATCTTTGTTGCACTTTTGGTTTGTTTGCTTTTGGGAAGTGGTTTGAATCCATTGCAATCATACAGAAGCTATGCTGCGCTACAACTGTTGTATCATGTGTGAACCTGTTGTCCCTGTAGGA
Gma.10626.1.S1_at	BE821063		0	No Homology to Known Proteins			TTTATCATTTCTTGCCTGTGGACTGTAGTGATTGAACAAATAAAAGTGACCTGTCCTGGGATACTGACAGGTGACAATTATCAGCACTGTTTATCACTCCAGCCTGCCTATATTGGAGGATTGAAAGTGATTTTCCCTTTATTTGAATCGGGAAAGTAAACTCTCCCCAGCCTTGATGATGTTTTTTNGCTTCTGTATTCCAGGCAAATGTAAGTTTGTATCCTGATATTTAAATGCCGGAGGTTTGTAATTTGTAAGCATATCTTAGTTTCTATTCTTTTGACATTTTGTATCACACCTTATAGATCATT
Gma.10850.1.S1_at	BI788127		0	No Homology to Known Proteins			GAACCTTCGTAGCCATGGCCTTGGTGGCTTAAGATCTTTCATGAGAACAATTGTCTTTGATTCGTCCCACGTGGTGGCATTTCCGCCCTTGATCTTTCTTTT
Gma.10888.2.A1_at	AI748644		0	No Homology to Known Proteins			TTCACTTGAGTTCTCTTGATGTTGTTGTGATTCGTGAAGGCTGTGAAAATGCATGTGTGTCCATTGGGTACGT
Gma.10888.2.A1_s_at	AI748644		0	No Homology to Known Proteins			ATGTGCACGTGGGAATTTGAATTTGGAGTGCACGATGAGCCACATTCAAAGGGATAGAATAATGGTTCTTTTTCTTATATGTTGATTTGGAGTGGGGTAGTGTAATTTGTTGGGGCGCCACTAGTTGGAATAGGGCCCCCGAGTGTTAGAGTTCGTGTTTGTTTTAGCTTAGCAATTTGGC
Gma.12826.1.A1_at	CD391629		0	No Homology to Known Proteins			CATGTCTGGTGGCTTTAACTTGGTGCCTTCATTGAATCCGGATCTACTTCTGTAGCATATATAATTATACACGTTCATTTGTCAAGTATTAGACTGAATCAGTTCATAGTTTTCAAGTGTAGTCAAGGATGAGATCTGCTGCAAACTTCTTATTGTTCATTACTGCTCCTTGCAAGAACAGATGTTCTTTCCTGTGACATTCATTTGCTGAAACTTTATTCTGCTATTCTTGTTGCCATTTTTTTAAAAGTAGTTACTGTTATTTAGTTCTCAAATTCTCATGTATCACAAAACTATAGTTTATTTGTTCCACTAGCAGAAATTCCAGCTGCATTTGTTGTTATGTGTGGGGAGAATAGTCACATGCTTGTGACAAGTATGTTACGGATATTTTGTACC…
Gma.12892.1.A1_at	CD394551		0	No Homology to Known Proteins			GCAATAGCATGAGAATATGAGATCATGGATTTTGAAAGGACCCAATGGAAGCCNATTTATTATGTCTTTTTGGNTTGTCTTTTGGGAAGTACGTATGTGTATGTATGGGTTTGGTTTTATATATGTAGTATCCTGATCAAGTTTCNANTTGTTTTTTCTTCTTTGTTGAGATATTGTAATGTACTGATGCTATCCTTTCACCAACTTGAATGTACAAGTGATCTTGTTACTGATCCTATCCTTTGTTGAATCAATG
Gma.1295.1.S1_at	CD397377		0	No Homology to Known Proteins			AGTTTCAGCAAAATTCACCAATGGCTTTCTCCAAAGCATTGTTCCTCGCCGTCGTAATGTCGGTGTTCGTCGCCGTCATCTCCGCCGCTGAAGCTCCGGCTCCGAGCCCTACCTCTCCCGCTGCCGCCGTGTCGCCGTCATTCGTCGCCGGTGTTCTCGCCGCCGGAGCCGCTCTCGCGTTCGGATCTACACTCCGGATCTGAGCGTAGCTCATGGATTTTATTTGTGGATTTTTAGTAGAAGCCGAGATTTGAGTAGCATTAGTATATAATTCTCTCTATTGATATTGCTATGTAGCGATTATTGCTAGATATGTTGATTTCTGGATCTATATTGCTTTTATGGTTTGACTAGTATTCTTATTGTTGTTATCATTGGTTCTAGTACAT
Gma.13218.1.A1_s_at	CD391892		0	No Homology to Known Proteins			TTTACCAATATATGGCAATGGAGCCTTTTCAGTTTATCAAGTACTTTTATTGCTGAGAAAAAAAAGTACTTTAATTGATGTGTTTGCGATTTCAGTGTATCATTAGTATGTACTTACTAGTAGAAAAACTGAAGATATGCTGTTGCATTGTGTTGT
Gma.13100.2.A1_at	CD401239		0	No Homology to Known Proteins			TAGTAGTAGACATCACCCTCAGCCCACTAGATGGAGATAACTGAAAAGCAATGTGCCATATTATTTTTCTTCCTGGTAGTTTGCCAATATATATTTTTACTTGAATGATGAAAGAAGCAATTAGTTTTCCCCCCATATTTGCATAATGTCCCCAGTTGT
Gma.12193.1.A1_at	CD412873		0	No Homology to Known Proteins			GAGCTAACCTTCAGCTTTTCTTTGAGTGGCTGTGTGGTTGTATAGGTANNNGCTTTATATCCCCCCTTTCTCCTTTTTGCAGTTGATATTTGTAATACGCAGATAGTGTGATTGTGTCCTCTCATCTCAGGTTTGTTAATATCTTTGTAA
Gma.12351.1.S1_s_at	BG651436		0	No Homology to Known Proteins			GGCGGTGTTGGTGCAGGGTCGGAATTTGGCAGCAGTGGCCAATTAGATAGCAAAACAAGCAGCAATGGAGATGAGGGTTTTGGGGATTACAGGGATGACAACGATGCAGATAATTTTGCCAAGAGGGCTTGATGGAATTTTATAGTTTTTTGTTTTCTGCTGCTCGTGTTCTGTATCCTACCTAAATCTCTTTGGACTTCAACCTGATAAGCATTTCATGCATGTTA
Gma.12505.1.S1_s_at	CD394519		0	No Homology to Known Proteins			ATGGTCGTGCTGTGGTTGTGGTTATGGCAATGGCAATGACAACTACAGAAAATTGCAGTGAGGTCCATTTTTTTANAAATCTTGGTGATGTTGATGTTGGTTACTTTTCCTAATTCTTACTACTGCTACTTGATATTCATTCATCTGCTACCACACCACTATACTCTTTGCTTTGCAGTTGCGTATGATCATGAT
Gma.12624.1.S1_at	CD400674		0	No Homology to Known Proteins			GCTTGTTCAGGACAATCAATTCATTGANATGGTCTATAGAGCNCTGCTGAATGCTCATCAATCATGACTTNCACGAGGTGTTTAATTATCATCTCGCTGGATGAATTGTTTTTTGGGCTGAATTACNTTTGCTATNCTTTTTAGGCCAGGCTATATNNTATGTCCTAAACTTTGAAATGTTTCAGTCNTATTNAATTTGTAAAATTGGTTGTGCNNNNNNNNNANNANTTTGATCTAGCTAGTTTCCTATGTCACTGTTTTTAGACAAGTCATCGCAATTTAACTGCCATATTAACTGTATTAGTTAGGTGACATGGCAGGAAATGGTGAGGTCCAGATGAATGGTTGTTAGCAATTCGGAACTGATTTTACAAATTATGTTGATCGACTGAAACAAAT…
Gma.11500.1.S1_at	BE058294		0	No Homology to Known Proteins			ATTCTAAGCTTTACGTATTCGGATTTATAGCCTTTTGTATTTTCTGTATTCGATTGAACTTTCTTCACTTATTCTCTTTGTATTGCTGCCTTGGGAGAACCAGATTAATGCACAG
Gma.11933.1.S1_s_at	BU082906		0	No Homology to Known Proteins			TTTTCGGGTTCGAGAAGGCACTTGTNTTGTTTNTCGTACGAAATGGAGACTAAACNGAGTTCGGTGANGGTTACGCTCAGTTACGGCGCGTTGACGTGCGCCGCGGAANTTCTCGCGACTTTGCTAGCTTCTGCTGTCGTCAAAGCCNCGCTTTTGGCCCCGGATCTCTACCGGCTGCTATTGANCAACACGCCTACNNCCAAAGGAGAGAGNAAAANTCAGAGTNAAGACAAGCAACGTGATGCAGAGGG
Gma.11298.2.S1_at	CD415329		0	No Homology to Known Proteins			ACCTCGATTACCATATCCTGCATTTTTCTTGACAAGTGTACATTAAATTACACATGTCAATATGGTTTTATGTTGTTACCCCATTGCCACATTGTGTGTTTTGTTGTTGGTCAACCTTAGCTGCTCGACTTGCTNCAACNTGAAACAAGCAATGCAATTGNAGGAGCAGGTGCAGAAGTGTCATCCATTGTTTTCTTCCCTTNTCAATTNTTTTCCTTTTTCGTTCTTTGGTCCTTCCCAGCTCATCTCATCTCATCAACCTTTGTCCNCCCCCCACCANTTCATATGCATATTTTTCCAAATGTCAAATCATGTCTCCTTACATATTGTTCAGTCTTTTTCAGTTTTATAGGATTTGAATTGAATGAGCCCAAATATATATATATATATATATATATA…
Gma.14471.1.S1_s_at	CF921241		0	No Homology to Known Proteins			GAGCATAAGGGTGAGCACCATGCTGGAGAATACA
Gma.14304.1.S1_at	CA852438		0	No Homology to Known Proteins			AAATATACTTCTCTTGTCGGCGGCAATAGACAACAAAGGTAAAAGCCGGCGAAGAGCATATTTCCAAGTTTGAGGATTGTTGAAATGGGGTCATAAGTCATTTGTCTTGGTGAGAGTTTGTACTGTTGTCTTAAACCAGTCTTATATCATTTTATCATCTTAATTGAAGTAATGAACCCACAATATGGAGGGATCGTTACTTCAACTAGTCCCATGTTCTTTAAATGCATTTC
Gma.14197.1.A1_at	CD417305		0	No Homology to Known Proteins			GGAAGTAGCTCTTGATATGATATCTTTTGGTAGTAAGCAAGAACTGCACTTATCAGGGCAAAAGTATATGATGGGGGCCTTTCTGGATTGTGTTGCCCCCTTTAATTGCCAGGGAAAGAAACTGTGATTTACTGTGTTAGAAAACGGAAGGTGGTACAAGTTACAATACGCTTGCTCTGGATGAAGGGTAGTTGTTGAATTAAGGTTGTTTGCAACAAAAGGGTTTGAACTTTGGTATGGTTGTCGTAGGTTTTGGCGACAGTGACACGTTTGAAGATAGTATCATCTTGTTTCGGCTCCTTTGGTCTCCACAGTTTTGATTAAATTTAAATTACGGCATTGGATGCTTTGGTTCGTAGTTGTTGGCATAATTCAGGAAACTTTGATGAGGTAGTAGTT…
Gma.13373.1.A1_at	CD398686		0	No Homology to Known Proteins			GTGTTTTTGACGGACGAGTTGCAACAATATTCTGATTTGCTGGTAGTCATATGCATCGGGGCCATTATCGTGGAAGTTTTGCTGCCTTGTATCGCTATCCATGCAAAGTGAGGGGTTTTTCTGAGAAGCNATTAGTCCGGTTGAATTATATTGACANCNGTGAGTATNTTATTTGGGGGCACCCAAGTTGTTAAGGAACATAAATAGCAAGATTTTCTCACCTTTGGATCTTTTAGTAGTTTGCTTCGACGATCAACTCCCTTTTGCCCCAGATCTGTTGAGACATTTGTTTCATCATCTGTGCCTCTGGTTGCTGTCTTTCAGTGAAA
Gma.13378.1.A1_at	CD395558		0	No Homology to Known Proteins			TAGATGCGTATGTAACTTTATATAGAGATGAACNACCCCATTGTTTTTTTTTTTTGGTTAGTTGTTGCCTCTTTACCAATCAGTCGGTCTTATTTTCATTCTTTTTGTAGTGGTAAACTTGGTTTTTTTTTAGCTGCCTTCCACCCTACATGCCCAAAGTGAGTAAAATCTGCTCCATAGTGCCACAATGTATGCCTTTCTCTTTTCTTTTTGTTAGGGGAGGACCATGTTTCTTCCGGCAAATGTAT
Gma.13428.1.A1_at	CD397879		0	No Homology to Known Proteins			GGATAATTTCATAATGTCTCCCTTTTTTGTTCGATATGTATGAAACCCTGTTGGGCATGCTAAATGCCCTGTTCTCTTTGGGCTCTCTGTTGCAAACCATCTGACACAGACTTGGGTGTATTTCTGGCCAACTCACAGGCTATAACCTTTGTCACTCTGGCACACTGTTGTATGGTCTGTATTATGTTCACGTCAAAGAGATCTTTTATATTACTGACTCTTGTTTGGCTTAAA
Gma.13643.1.A1_at	CD402512		0	No Homology to Known Proteins			GCTTAATTACTTTCCGTTGTGATCAATTGTTGTACCGATGGGTGTTTATGAAAGTGGAGCTTCGGGAAAGATGGGCACTCGTCATGTGCTGCAACTCGATTTGTCGCAACAAGAGGAGAAGAAGATACCTTGATGAAACCCCATCAGGATGTGAACCAAGGCCACTGCTCAAACTCTTCGATATGCGCTAGCTAGGCAATCCCTTTACTTAATCTGATAATTGATCTCTTGCTACCAGATCTGCCCTTACGGATCTGTTGAA
Gma.13337.1.S1_at	CD412716		0	No Homology to Known Proteins			TGGTTTTGGTGATTGCCATGTTGGCGATGGTAGCAACTGGGGTTTCAGCTGCTGAGGCACCTGCCCCAGGTCCTTCATCCGATGCCACCNCCTTCTTTGTACCCACTGCTCTTGCTTCTCTCTTTGTTCTTGCATTTGGCCTTCTCTTCTAATTAATTCTTCAACAACCTTTGGTTATTTGTTACATTACATATATGGAATTCACTTTGTTCAGAGGTGGTTGTGTTTTGTGTTTCGTTCTTCTCTTTTTTTCCAACTCAGCTTG
Gma.13244.1.S1_at	CD395627		0	No Homology to Known Proteins			GGCCTGGATTTGTTCTTCGCTGGGCTTTAAAATGTTGTTGGGNANNNGNGTTTTGTTTAATGGTTATGTATATTATCTTCTGCTCGGTAATGCNNAGACTTACTCNNAGTTTCTTCTATTATTCTAATTTCTACTAATAATTGCATCCTAGTTAGTGTGAATNTGAAGTAAATTTAGTGAATGACNAATGGTTATATGAATTTCGTGTGTTGAATACTTTCTATTTGGATTNTCGTTGTATGTGATAATTCGGCTACTGTGGATTAAGTTGAAGTTCAAGCTAAGCGTTCTTGGCCA
Gma.13298.1.S1_s_at	CD395877		0	No Homology to Known Proteins			TTCTGGTGGTGATCGCCATCGGGTTGTTATTCGGGTTCGGAGTGTTCAAGCATGGATTCCACAAGATCAAAGACACTGTCAGTTTCTGCGATTCTTGCGGCGGCGGCGCCGCCGGCGGAGGAAGACCCTTCATCGGTTATGCACCGCCGCCATTGTTCTAGTTCACCATTCTCTTGTTCTATTTCGCTCTTGTTAATTGTTCTGGGGATTTGTTTNGTTTCTTTNTATAAATTAGTATTCGTTAGGGTTCATATTTGTAATTACCTGCTTCTTG
Gma.1526.1.S1_s_at	BE822523		0	No Homology to Known Proteins			ACATGATGAAGCGTAGGTGGATGCGGGAAAAGAAAATTGTTTTGCATAGTTGTTGGGTTTAGAATTTCATAGGATGGTTCCCTACCCACATCCTTTTCTGATAATTAGTTTCTGAATTTTTATTTTGTCCTCCCTCAGTAGGTTTAGATTAGTGCACAATNGTAATTAGGGTTTAATATCATGATCCTGTACTTAAAGTCAAT
Gma.14379.1.A1_at	CD412090		0	No Homology to Known Proteins			TAATCTTAATAGTCTCATTGTGGTTTTATTTGTAGTATTCCTTTGGTAGGCATATTGGTAGCATGTTGGAAAGTGATTTTACTCGGGTAGTTATTTCACGTGTTCCAATTGTTGAGTTCCCCTGCTGATTGGAACGAGTATATGTCTGTTGATTAATTACGGATCATTGAGTAGAGCACATTTCAAAAGCCTATTGTCTATGTTNATCATCAAGGGAATACATGGTTTTA
Gma.14945.1.S1_at	BG157566		0	No Homology to Known Proteins			GCAGATTCCACCTCCAGTGGTGGTGCTGCCACCGCATCTGATCCATTTGCTTCTGCTGGTGGAGCTGATGAAGATGATCTTTACAGTTAGGTCAACTTGAATGGTAGTAAATGCCGTGCTATCTTAGTTATGTACTTCTCATTTTGTGTATGCAAATGAGGTCTCTAAAGGCTTCCTTTGGATTATTGTTGTCATTGTTTTGCAAACGGCAT
Gma.17607.1.S1_s_at	BE658397		0	No Homology to Known Proteins			AGTTGTAAAGCACTCTGCGCTCTCTCTGCATGATCATG
Gma.17607.2.S1_s_at	AW201640		0	No Homology to Known Proteins			ACCACCAGTTCACCCTCCCTACATTCCACACCCAGTTTACCACTCTCCTCCACCACCACCTTACAAGAAGCCTTACATCTATGCATCACCTCCCCCTCCTTACCACTATTAGCATACCTCTTATCGATATGAA
Gma.17639.1.S1_at	CF921774		0	No Homology to Known Proteins			GGGCTCTCGTGTCCGTAAAATGCATTCATATCATGCATCGCATAAGCATCTCTTCATAACATCATAATGAACATATCGTTCCTGCATTTGTCCGTTATCATATTCCAGCCTCACATTTTGCATGAGTCATGGCATCATCATGCATATGCGTTCAACAAACTTTTTGATCTGCAAAATTGCATACCATTTGTTTTCATGTT
Gma.17678.1.S1_at	CA803049		0	No Homology to Known Proteins			GAATTTTAGTTGAGTACACATTTAATCATTGTTGTCAGAGATTTTTTAAAGTTGAGCATGTTGCTTCCTAGGTTTGGTTGATTATTGTTTTTTATAATTCGGTTCTCCCTTTCGGCTACTCTTAAGCATGAATGAATTATAAATCTATTCGTTGTTCGTCA
Gma.17343.1.A1_at	AW596532		0	No Homology to Known Proteins			TTTTGTTATTCCAGATTTGCTTAGATTTCTGTTGATGGTATGCATAATATATCCGCTACCCATTTTGTGAACACTTGAGTCTGAGGGAATCTTCATGACAAGGTACTGTTATTGAAACAAAACATGGTGGTTCTTAAAGCATGGTGATGGAATGCTGCTATTATGCCGAAGAGGATTCTACAANNNNANNTGGGATTTCGTTTTGTCAAATGATCTTTATGGATACAGCTTGTGGAGCGCTGATCTTTCAGTGGGCTTCCCAAGTGGGACTAATTATTACCATGGTTGTACANNGTTTCATTTTGTATAACTTTCATTGTTTTTTNAAACTGGATTAGACTGACTGGTTTGAG
Gma.17258.1.S1_s_at	BG509247		0	No Homology to Known Proteins			CGTTCTGAACAGAAGCTATATATATGTAGCTGCTTCATGAAGATGCAGAAGATCATATACGTGCATTCTTAGTTTGCATATAGTCCAAAATTGTCACATACCATTCCCTTATTCTTTTATTCCTGTGTA
Gma.16950.1.S1_at	BQ454216		0	No Homology to Known Proteins			AGGCTTTGATTGGTGTTAGGCTTTCAACAAGGTGAATATTTCAACCATTAAGAGGCGCAGGTCGTTTTTGAATGGCCTTAACATGCCACCTACTTCTGCTGATGTGATAATATTCATGCTACCTTTCCTTGGTGGCATGGTAAACATTCCTCTAGTTGGCCGAATCTTCTTTTCTTGGTTCTCTGCGGTATTGAAGCATTTTGGAACTTCACATTGCATTCATCTTCTATAAATTGCATGTTTAGGAATTCAAATTACAATGGAGACGGATTGTCAGTTCTAGGGATTCA
Gma.17137.1.S1_at	BE022871		0	No Homology to Known Proteins			GTTCAACAAAATTGCCATGTTCTTTGCTTGTCATCATGTTTTTCCTTGCAACGACTTTGACTTTCACCTTCAAGACCATGACCTAGACAACGTCGTTGCACATTTTTTTAAACTTTGTTATTATCTTCTACTGCTTCGAGCATACTCACTTACTGGTATCATTTGTCCTTT
Gma.17241.1.A1_at	AW310327		0	No Homology to Known Proteins			GCATGCATTTTAAACGGAGAGCTACTCTAACTATGGTACTATAGAAAAAATCTAAGAGTTTTAGTATTGTTATTTTTTTGGATTAATAGTTGAATGAGTTTGAGAAGTGAAAAAGAGAGAGGGAGAAAGAGAGATTCATTAAATGGAAGCTCGTTTAACTATTGGTAAAAAAAATATCAGTACTAAAACCTTAAATTTCTCAGGCTACCATAGAATTTCTCTTTTAGACTTTTCTAACTTGATAGACTTTGTTTGGATGAGTTTGCTTGCAAATTTTACATTGGCAACTGTCCCCTTTTTTCTCTTTGATTTGGACTCTGCTGCTTTCTTTGTGAAGAATGAGGGAAGAAGACAGTAAAATCGTACAACTCAAAAATGAACTCTATCCCAATTCCT
Gma.17888.1.S1_at	BQ473851		0	No Homology to Known Proteins			TACACCAAGATCCTAAAAAGCACTACAAATACCAAAATCTTCCACCATCAAATTACAAGAACAAATCACCATCCTCACCATACAAGTACCCATCATGCTGCACCACCACCTTACAAGTACCCATCTCCTCCACCACCACACTGTACAAGATACACCATCTACATGCACGCCCAGTGTACAAGTANNNNNCTCCTCCTNCANCAGATTACAAGTACAAGTCACCTNCNCCTNCATACAAGTACCCTTCACCTCCACCAACACCTAAGAAACCATACAAGTATTCATCTCCACCTCCCCCATACCACTACTAAATAGTGATTTAGTATATCATCCCATGGATCTGATGAAGAACGTGTGCAAATAAAGGAGATTGATATGGACGGAAGAAACACTGAAGCA…
Gma.17798.2.S1_at	CD412748		0	No Homology to Known Proteins			AAGATACGGCAGTTGTTGTTACCACTTCCTTAGGTGGCACCCTCAGAAATAAAAAAATATGCTCCATATTTTATGTAGTTGCAATACCTGTGCCCTGTCACTGAGGCCGGTGTTGGGAACTACTGCTTTATCTTGTATAGGATGAAAAATGTGTCAAAAAGCAAGTAATAATATAACATAGAGTGGGGAGTACTTTATGTTGGTATGTGATGCTAA
Gma.1780.1.S1_at	BM892829		0	No Homology to Known Proteins			TGGATCCGACAAACATTCTGGCAAGAGGAGAAAGAGAGGTAGGTCAAAGAAGAGGAGTGCTAAGAGGGAAGTTAGTGATTCGGATGATTCACGTGAAGAAAGAAGGAGGAGGAAGAGAAGGCGAGAACCCAGGAGGAAGAGGGACAATTCTTCAGATGAAGACGACGAGTATAAGCGCAGGCATAGAAAGAGTAGGAAGGAGAAGAGGAGAAGGAGAAGCCGTCTATCAGATCCTGATTCCTCTGAAGATTTCATTAGAAGGCACAAGCGAAAGAACAAGAGGGCCTCATCATCATCTGACACTGATTCAAGTGGATATAATGATTCAAGGAAGGGTAGGGATGTCAATAAATCAGGAAAGAGAAGGAGCCGTCACCATGGGGATGATGAATGATTAGT…
Gma.17894.1.S1_s_at	CD393748		0	No Homology to Known Proteins			TCGGTTGTGCTGTCATTGATGGCTATCTTGAAGCATTGAATTCGTTAATTTCGTTGGGTTTGTACAAAATTGATTCGTTTTATATACAGAGTGGTGATTATGAGCTTTGGTATCTATACTTATAGGTATACCGGAGAGAGATTATACAGTATTTAATATACTTATTGTTATTTGTTTTAGGACTTAGGGAGAATAAGAAGGATTTTATCCTTTACATTGGACCCGTATTCTTTTTCAAT
Gma.1877.1.S1_at	BG791149		0	No Homology to Known Proteins			ATTATTAATCGATGGTTGTCACTTTGATGTTGTGTTCTGTGTTTGTATGTGTATACTATCTAGTAATGCGTTTGAACTGCCAAGGACAAGAGTACTTTTATTGATAATAAAGAAACGAAAACGTTTCAATTGCGTTGGCT
Gma.16925.1.A1_at	BG653419		0	No Homology to Known Proteins			GGTGTTCAAACATATTCACGAGGAAGGGATTGATGCGAGAAGAAGTCTTATTGAAGCTGCAGTGCGTTTCAAATAAGTATGTGATTTCCAAGTTGTAGTACATTTGAGTTGATTCACATGGTTGCTATTTGGCTTCTCTCTCACAATTCAATATACTGGTCCCTTCCTTTCTGATTTTTCCTCTTTAATCTTTTTGCAAATAACATGNAAATACTTGTTTTTCTGTTAGACNCGGTGGTTCATTAAGTGGCCAAAACCTGTTTT
Gma.16919.1.S1_s_at	BI967467		0	No Homology to Known Proteins			ATTTTATCTGTTAGTAATTTGCTACTACTATTTTACATTCTCTTTCTCTCTACGTTTTATTATAGTCATGGCATCTCAAGCAGTTTCCTTCAAGTCCTTCGCCGTTGCTCTTCTTGTGGCGCTTTTCTTCGCCGCCTCCGCCTCCGCTCAGGACTTGCCTCCGGCGGCGGCGCCGGGACCCGATGCCGGGGCCGCCGGAGCCGTTTCGAGCTCGGTCGCCATGATTGGAGCTTCCGTACTGTTGTCAATGCTCGCCATCTTCAAGCACTGAGTATAATCTGATGGATCCATCTTGTGTGAAGA
Gma.1670.1.A1_at	BI893962		0	No Homology to Known Proteins			TCAACCTCATTTAGGCTCTCACTCATGCTTGACTGACAGCTGACAATTAACTTACAAAGACAACTCTGATGGTCAGATGAGTGTCACACGATGGTTTTGACTCAACAGTTGCACTCTTTGGTTGGTACTAGGTGTTAGTTGGCAAATCTGTTTGTTAGGTTTTCCACGTGTCATTTCTCCAGATGTATCTGTAGTATTGTTTANTCATTGTTGTATCAATTAGATNANAGGATATATGTTGTGCCATTTTCTCCCTTATTTATATTCTATATGGATATGTATGTTATAAATGTGATTGTATGTGAGTGTTTCTGAACTGTAACCTTTACT
Gma.16828.1.S1_s_at	AF047051.1		0	No Homology to Known Proteins			GTTGGATTCAAGTAGTTTATGTTCGTCTTATGTTATTAGCTCAAAACAATGTTGTTACTGCTTTTG
Gma.16829.1.S1_x_at	AF047049.1		0	No Homology to Known Proteins			GTATTATTGAATTTCTCCGGAATCTTCTTCTGTGTATGGTTTTCCTTCCTTTGTGTTTTCTTTCCTGTTGAATCGGTGGCCGTTGATCTTTGGT
Gma.16832.1.S1_s_at	L22029.1		0	No Homology to Known Proteins			ACTACTAGATAGTGGTTTTGCTTAGCTTCCCGAGTAGTTATTAATGAAGAATATAAGCCAATAAAGAACGTTGTTGATAGCAGGAAGATGCACTTCGCAATTACACAAGGAAAACAACGGAAGCAAAGTTTCCGCGCATTTTGTCACATAAGAAGAAAGAAGTGTCCATCCTTTTCTTCTTCGTTTGTATTGTTTATGAATTTTTATTATTGTGTTTTTAGACAGTTGTATGGCACTATATCACATGAATGCATTTTGGTTTGTAACCTGCTACGTTTGCAAGGG
Gma.16644.1.S1_at	BM094345		0	No Homology to Known Proteins			AATCAAGCCTCATCATCGATGCAGTTCCTCATCCTCGAACAAGTTCAGTTCTTGAAGGTGAACGACGATTCCCTCTTGCAGTGGGAACTCGTCGACGTCGTTGACGCCGAAGAGGAGATAGATGGCTTTGGTTCTTCGGATTCTTCCGTTTCTTGGTTCNAANTCCGATTCTTCTCCCTGCGATGCCCCAATTGAAGAAATTCGACACCTTCTTCTTCATCCCGATGTTGGTTTACAAGATCGACATGATGGTGTTGATGAATCGGAGCAAGATTCNGGTTTGGAAAATCATCATCACTACCATTATCACCATGATGAT
Gma.16606.2.S1_a_at	AW396382		0	No Homology to Known Proteins			GGATTCTAATTCTATGTTTTAGCCTCTCGGGGGTGTCGTCGTCTTTTTACCCAGGAAAGGGGGNNNNGNNGAAAAGGCGAATGCAGTAGTAGTGAACCGAAATGGACATCGAGGAGTTGTTGTCGATGATTCGGGTACATGTGCTGCCTGTTGTATTGCTCGTGGCTGATGTTGTTGCTATGTTGGCGTGATTGTGAATATGCTTGCAAATTGATTGGTGTGGCTCATGGTCATTCGTGGCTGCGTTT
Gma.16421.1.S1_at	BI969187		0	No Homology to Known Proteins			TGGTTTTGGAGTTCATTCATATTTAATAAATCTACCTAAGTTTTTCTTAATTTTGTATTTTGGCANNNTNNGNCNNNTNNNGNNNNNCNCCAATGATGATAAATCCTAAGGCTTGTTTCTCTAAACATTCGCAGTGGCCGCCCAAGAGCTTTCGCCTTCGCCAGGCTAGAGAGCTAATGCTGCTATTATCCTTCCTTGGATGTCTGAGGTCAAATTATATCATAAGTTTGACTATTTTCTCATTTCAGGCTAGCACCTGTGTCCTTGGTACGATTTTGTTACACATGGCTAAATGAAGATGGTGTTTTCGTCACTCATATTTTTGTATCCACTGGAATTAGTCTGTTCCCGCATAGTTGACAAATAAATACTATGTATAGATGGAATGGATCCTGAATC…
Gma.15769.1.A1_s_at	BG045620		0	No Homology to Known Proteins			CAAAATGGAGTTGCACTTTTAGTTGATGGGAAATATTTGGGAGGCATGTTGGAGGTTCTAATTTTATTTTAAAAAATTTGTCAAGTGCATATGTTTTTTGCCCCCACCTATGTATGGTCCCAAATTTTGTAACTGCACGTGTAATCATATTCAAGTACTTCAGATGTTACCCTTCACAGGTTACCATTAAAATGCAAGGTTAAAGTGTACTGTGATCAAACTGGGTCGAGTATTTGCAGAAATA
Gma.15638.1.S1_at	CA802038		0	No Homology to Known Proteins			CCTCATTAGGGTCTTTGGTCTATTTTTATTCGAATTATGGCGTGAACTTTGGATGATTTGAGTTTAAGCTTCAAGGCTTTAGTATGTTTTGGTTTAGTATATGATTTGAATCATGGCTTGAATTTTGGATTAATATATATGATCTGGCTTCTATATGGTGCTATTCCTGCTA
Gma.15564.3.S1_s_at	AW185750		0	No Homology to Known Proteins			CTTACCACTATTAGCTAGCATAGCTCTATGGATATGAA
Gma.15513.3.S1_x_at	AW598013		0	No Homology to Known Proteins			GTAACAGTTTAGGATGTCCCTGCAATTGCCATTTGTAGTTATCTGTTAATTCTGTTTGCCTTTCGGGTCTTCAACCCATTTGTTTATTACAAT
Gma.15543.1.S1_s_at	L22030.1		0	No Homology to Known Proteins			TGAAAGCACCATTCATGATGAATCATGTTCTAGTTTTCATCGAGGAATAAAGGCAAGCTCTATTTTGAGCCAAGTGAAACATCTATCTTCCTGTCTAAGTTCTTTGAATAAAAGTCTGAATGTGTCATCTCTATGCTACAATGTTTATGATTCAGATCAGGTTGATTCTATTTGTTTGA
Gma.15882.1.S1_at	BQ452888		0	No Homology to Known Proteins			TCAAAAATTTCAGCTCGGATCGATAATGATATGCGGAGTGATTATTCGCAGAAATCGACAGTAACACGGTTTTCTGCCAGGGTTACAAATGATACCCTCAGTAGTTCGTCACACATGTCATCAGTATCCCGTGGCTATGGCTCTCGGGTGAACTTTGACATCACCAGCTTCGCATCATCCCGGGGAATTGCCCCTCCTGGCTGGACTTCGCGAGTCCATTNGGCTATCCGAAGCAATACTTCGGCAACTTGATTCATGGACGCATGTCCATAACATATATAAGGAAGCCACTTCTGGGAGAAAGTACTGTT
Gma.2692.1.S1_at	BI425364		0	No Homology to Known Proteins			TCTTGTGACTTGACCTTATAACTCCTATCGGGATGTCCATTTTAATACTTCGACTTCGTAAAAGGATGCGTAGGGATAACAAAAGAGGCCGTGTTGCCTTAATGTGAGTAGTTTGAT
Gma.2590.2.S1_at	CD414388		0	No Homology to Known Proteins			ATTTCATATTAGCTGCCTGCTGCGACTTCCTTATGCATAATTTTACTGTTTATAGAAATTGTGAAGCTATACTGTTGTAATTGTCATGTANATTGTTCCCTTTTTCATCTTACTTGATTTGGTAAACTCCGGTTACTTGTATCCAAATAAGATGGGCCATTTGTATTGCGGGGGCTTTGTATAATTGTACAATTATCTACTTGTAAGAAGTTCAGATTCGGGCGACAACATTTGTAATGCAGAATTAGGTCATTAACATTGTAAATCTTCTGGCGATGATTGGAATATCAATGTGAAGACGCTATATGACTTCTGCTATGACAATATCATTGTGGTTGTCAAGGTATTTTTGAAGAAATATCGTGGATTTACAAAGAATCTGGTTAGGCTTCTACAATT…
Gma.2540.2.S1_s_at	BI787366		0	No Homology to Known Proteins			AGAGGAGCACAAAGGAGAACACCATGGTGAGCACAAAGGTGAACACAAAGGAGAACAACACCATGGGGAGCACAAGGAGGGACTTGTGGATAAGATCAAGGACAAGATCCATGGTGATGGCCATGACAAGGGTGAGAAAAAGAAGAAGAAGGACAAGAAGAAGAAGGAGCATGGACATGACCATCATGGTCATAGCAGCAGCAGTGACAGTGATTAGATCTTATATGTTAAGCAGGTGTACGGTA
Gma.3112.3.A1_x_at	BG839772		0	No Homology to Known Proteins			GTAGCTTTTAGACAATGATTCTGGATAACGCAATGGCAAAATATTTGCCATTCAATATAATAAAGAAATAACTGTTCTTTAAGGATGGTGAATTGGTGATTGGTGACTATCNTCCAAGTAACACCATTTTCACTCATTGGGGTCGAATAGCTTTTTTTATCCTTTTTTCATAAGCTTGGCTTATTAAGGTGTATGTACCTTGGTCCATCTTAGTNACAGTGCATGTAAGACCATATCTATTGTGATCCCCACAATTCTGTAACGTGGGGGTGCCCTACTTGTAGGTAGCTTCTCAACATTT
Gma.3102.1.S1_at	BG839165		0	No Homology to Known Proteins			TTTCCTCAATCCTAGTCTCCTTTAGGTTGTTTGTTAGTGTTTTTTGCTTCATTGTTTTTCGATCTTATTTGAAAGTAGCTTTTAAAGCACATCACGTTGATTAGAAGCATGTTTCTTGAAAAGGGGATAAATATACTATGTTTGGGTACCTTGTGGAAATGTTATCATGTTTGGTATAGAGCTATTGCACTACTTTACTTTGGATCGGCAGAAATGTTGAGGCTCAAGTTCCTGGTACTATCTTCTGGCACTCAAGAAAAGAGTTAGCTGAATGTTTTGGTGGGGCTGAATTCTGTATGTTTTCAAGTCGGTTTTAAAANTCGGTTTATTTTCAAGGCTGTAGCTTCCAATTTTTATTATCTTTACTGTCACCTTAAGATAAGTTAAACCCTTTGAAGT…
Gma.3109.1.A1_at	CD408055		0	No Homology to Known Proteins			GATTTGCGAGTTTTTTCATTCCCAGCTTGTCTTGGAGGGAATTTAAGTAAACAAGGACAAGGATTCAAGGTTGGTGGTCAACATTATATTCTAATGGTTATGATGGCCCACGTGAAGCATGACTGATTTCCGATTTCAAAAAATGTTGTAGTCATTAAAATTGGACTGGGTTTGTAGTATTAGTTTGAAGATGCTCCGAATAATTAAGANTTTTCTATTTATATTTTGGATTCTAATATTTGCACGTTATAATTTCCTATATCTCTTTTATCAGGTT
Gma.3000.1.S1_at	BE657172		0	No Homology to Known Proteins			TTACCATACATCTTATGCTTTTGAGCTTTGCTTGTGTTCACTTTAGTTAAGTTTTAAATAAAAGTTTATTTTATTTGGGATTTTTAGTTTATTCCTTTTGTGCTTGATCCTTGGATTGTTTGCTTATGATTTGTAAGAACTTTGTTGAATTCTAATCAAGTGGAAAAGAGTTCACAAGTAACTACACTAGGGAAATCTTAGAAGCTTTGAAGCTAAGAACAAAAGGGGTTCAATCCGAAGAAGTCAAACATATCACACGTCGATCAGAAGCAACCAATGATATTTATGCCTACGGGAGTGCATGATTCTATTCATTTGATTGTAATGGGGAAATTCAATCGGATTCTGAATGAAGAGAACAACCAATGATATTTATGCCTAGGGGTAAATTGTTAGACA…
Gma.2921.1.A1_s_at	CD417900		0	No Homology to Known Proteins			AGTGGAGATGATGTGCTTTTCCATCTGCTACCAGCTTCATGACATTTTATGCTGTCATGGCTCTTATGATGATCTTGAGGTCTAGTGGCGAGGGGAGCTTCCATCTTGACTTTAGTTTAGCTTTACTGGTCTAAAGATTGCTGTTTTAGTGTGGGTTAAGTTATGATATTGAGAGTTTTGTGTTATCTAATTATGTACTGGTACGTTTTGTATACTTTTTGGTTTATCTTAATAGCT
Gma.2772.1.S1_at	BG238134		0	No Homology to Known Proteins			GAGTTAATTGATTGGCGTCTGGGACGCACGCGCTGTCGGTATAACCACCGTAAGATTGAAGGTTTGGGTTTCTCAAACATGTTAATTAGTTGCCTTGATTTCTCCGAAGAACAAAACGAAAAATGATTCTACACGTCTCCCTCTCTCTCTCTCTTTGTCCTTTTCGGATTAATTAGGTTGTAATAATAAATAATATAGGAGGCTTAGCAGTGCTGTTGATTGATGAAATTTTAAATGATACNAAAGTTTGTTATTAACTGTTGTCTTTTTTTCTTGTGGAAATGACACATTTTCCCTTCATCTCTCTGTATTGAATTATCTTCTCTCCCCCATATATACAANTNNAAGGAACCTATTTGGCTATTTCCATGAGATATTGA
Gma.3492.1.S1_at	BE347724		0	No Homology to Known Proteins			TCTCGACAAGCCCAACAGCAGTAATTTTGGTAGATGAATCTCTTGCTGGATCTTAAACTTCAACTTGAGGATCCCTGGCTTTTAAAAGTCTTAAATCATGAGGTCACAATGAATTCTTCCAGCAGCAATGGAGTGGCTCAAAGATCAATGTCAATACACAATGGGACTGGTTGGGTTGCTTGAATCCCAGTAGTTTGCAGTACCCGCTTTCCTAGTTTATAATAAGTAGTATGGTTGAAGAGATACTAGATGCTACTTTCTATTTAGTATTNGTTTCTGCGTGTAGCTTTAATTTGCTTGCTTATGATTTTAGTTGATCTGGATTTGTNNGTTCTTGNAGCATTTAAGCTATAGTATCATATTTCACCTTAT
Gma.3407.1.S1_at	BQ628049		0	No Homology to Known Proteins			AAGGTTAAAGCAATGTTCATAGCACATTTGGCAGAATAAAAAGAATATGGTATGCATCTAAATTTATTAAAACAATAAAAACTGTAGAGATGTGTGTACCCTGGATAGTAATTTGCGAACCATTAAACTCTTTTTTTAATTGTGTGAAGACTTTAATTATATATATTCTCGTGAAGACTGACTTCTATATCATCAAATATTTGTAAGTGCATGGAAGTCAATCTGATTTGAGGGATGCTTCTAGTTCATATGTGAAGGAAGAAAGAATAGAGGAAGTTCACTTCTGTGTTCAAGT
Gma.3367.1.S1_at	BU083449		0	No Homology to Known Proteins			GATTGCTTTTGATTCCAGTTGTTTAATTGTCAACTGTTTAAGAATAGCTATGTTGCAAAGTAGAGACTACTGTGTGGTGTTGTTGATTTATTAGTAGAGTATAAAATTAAGGATGTTTTGTCAATGTGTGATGCTACATATTTTCTACTTTGATAGTTTCCTGTTCAAAATCACGCAAGTATAAGTGCATGCAATTTCAAATTCCGTGTTGTATATATGTTAAGCTACTATATGTATGTGATCTGTTGGCACGACTTGTG
Gma.3707.1.S1_at	AW317215		0	No Homology to Known Proteins			AATCTCTATGGACTTCAACCTGGTGAGCATTTCTGGCAAGTTATCTTGATCAGCTGGACATGGATGGGAACAACGTTATCTAGGTCCATCTTAAGCGTCTTTCTTCCCTTATTTTCTTAAGAGTCAGATATCTCGTTTTTGTTGCTTACTTTGAGGTGATTGTATTAAACCAAATTGAGATATTCATACAGCATGTAAATCTGTGAATTGTTGCAAGTCGGGACAACAGTTTGAGACTTATGTGGGAATTCATATCAAGTGGTTTAGTTCTGGACGAAA
Gma.3714.1.S1_at	BG156642		0	No Homology to Known Proteins			AGGGTTGATTGATGTTTTGCTGCCATTGTAATATGTAGCTTTTAGTTGCACCTGTACTTGGTTCTTTTGGGGATATNTGGGAGNTTGATGTATTATATATAAAATGTGCCATGGATAGCTTATGTGGCAATGAGAGTACAGATGGCTGTAAATAACTGCATGTAGTGTAGCTTCAAGATTCCTTCCAGTTTTCTGTTTTGGATCATCATCAGATTTGGCCTTTTTTCAAGAATTGTGCAACTGTATTACATATTCGTTGAGTTTAGATGTCTGAAGAAGGAGCGAGATATCTGCCAGATGATGAAATAATGCATCCTTATGTTTCGCAAAGAAGCAGGGAAGGACATTATGACTCTCTGCTTGAGGTTTATGTTAATTGTCCTTCACTTGAAGGAAATT…
Gma.3663.1.S1_at	BQ630452		0	No Homology to Known Proteins			TGGAATAGTCTATTTTGGTTGTTTTGACAGAAGATGAAATTGAAGAATGTGTTTGGGCTAGTGTTTAGGTTCAAATAAAACATCTAGTTTTTCTAGGGAGAAAAAAAGGTTGCATTGCAGCTTTTGGGACCTGGTTTTAGTNNAAGGAAATAGTGAGAGGATAGTAGTTTTAGGCAAGGCTTCTTTTTCCTTTTTTTACCCTTTTTATAGTAATATTATAAGTTGTTGTAANAAGATAGGATAAGCGGGTCGTTTTCATTTGCCTTATGGTTATGGTGATGACACTGATGGGGCTAAAGCGCAAGGTATGGTATGGTTCAACGTTGGCCAAGTTTCAAGTCCAAGTGTTGAAAATTGGTCGATTACCCATGTGTGCCTTTACTGAAAATCCCTGCTCAT
Gma.3681.1.S1_at	BQ454069		0	No Homology to Known Proteins			ATTGACTCTGTCTGGGATTTGTTATTTTTTTCTTCCTCTGTTGAGGCTGTTGTGGCCATTTGCGGATATGAAACTATTGTGTATATGGGGAAAAAAAATCAATTTATGGGGGAATGGTTTGTATAGAATGGGAACAAGGAACTATCCTGTTATTTATCAATGTTGTTTATCATGTAGCCAAAAAATGTGAATGTCTGTAAAGATGTGAAGTTGTGAACTGGTTTCTTGCCATTGTAGTTGTGATTTTAAATATTNGATGCACTGTAAAGCACTGTTTTATCAACCCCTATTT
Gma.3619.1.S1_at	AW831066		0	No Homology to Known Proteins			ACTAGGTCCCATCAAGACAGTTGGTTCCAGCTTCTGGGATTTCTATCTGAGGTCTTCTCAAGGTGCCACGAAGAGATTTTATGGACTGGTTGTTTGTTTCCTGGTGTTGTGGTTTTGTAGTGCCCTGAATTTTGTCATTTTGCGCGTGGTATGAACAATATTCCTTAGGGTCAGTTACAATTTACTAGAGTTTATATATAGCACATTCTTTTGGGGCTTTTACCTCAATATACTCGTGCCATTGTGAATGTAGAAAAGCGGAACTAGGGACGGGTGCCTGTTTAAATTTTAGATAG
Gma.4110.1.S1_at	BU084188		0	No Homology to Known Proteins			GGAACATAATTCTCTGAGTGGCATGAAGCAGAGAAGCTATGGCCACATCTTAGCAAACCGGCAAGTCACAAAAAGGCAATGGACTCTCTCTCATTAAAGGGTCCTTATGGCTATGTATGTATTGATTCTATTGTAGTTCTTCTTCTTTGTTTCGGTAGAATGTATTAATAAACAAAGATGTTCTTCCTTTGAGAAGCTACATACCAACTTGTGTTGTCCATAACACTCAATTTGCAGATGACTAGAATCAGGCTTTCTCTTCAGTTTCTGCAAATGAGTAGGTAGGTAATTATGACCTTATATCATATCCCATGTGTGTTAGTGTGTATGCTTGCTATGTTGTGACCTTA
Gma.4111.4.A1_a_at	BI426730		0	No Homology to Known Proteins			CTTAGAACCCATAGTCTTGCGATCAAGAATTTTCATTTTTGTTGTTTCATGCCATCAGCTTATAATCCTGGAGTTTGAGCCCCCCCCTTTTGGTTGAAATAATTAAGACTCGTTTGGATTGCTCATGCGTGGTTGAAATTTGATTGTCTAGT
Gma.4111.4.A1_x_at	BI426730		0	No Homology to Known Proteins			GATGACGACAATTTCCTGGGATAATCATGCCGATTGCCTTGTCATTTGAATAATTATGGATGAGAAATATTGGTATTGATATTTTCCCAAATTTAGGACCTTGATACTTAGAACCCATAGTCTTGCGATCAAGAATTTTCATTTTTGTTGTTTCATGCCATCAGCTTATAATCCTGGAGTTTGAGCCCCCCCCTTTTGGTTGAAATAATTAAGACTCGTTTGGATTGCTCATGCGTGGTTGAAATTTGATTGTCTAGTGAAAGTTTTGTTATATTTAAGCTATTTTAATGGTTATGCAAATCTTGATTATATGTCGGTTAAATATTGATTCGGTGCAGGATTTTAAAA
Gma.3993.1.S1_at	BG510822		0	No Homology to Known Proteins			TGGGAAATTCAAACATCATGGCAAGTTCAAGCATGGAAAGTTCGGCAAGCATGGGAAATTTAAGCATGGGAAGTTNGGCAAGGGTATGTTCAAGAAGNGGAAGTGATGATATTATATTAATTTTCTGTACATACAAACCGCGATTCTGGATGCTGCTGCACATTGCTTTTATAATAAACTCTACTTTGTTTGATGTCCATCTATATTTTGGTGGAACTCTAGTATTTTTTTTTATAGTCAAAGATGTATCATCCCGTTCATATTCTATTATTCTAGAAAGTGCTTATTCTAGAAAGTGAACGTCAAATAGATGATGCTCTGGATATTATGTGCGAGCTTGCAGTTGCTTTAGAAAANNANNNANTTGTTCATGCCTTTTCTGTTTNNNNGCTTTGTATA…
Gma.375.1.A1_at	AW350435		0	No Homology to Known Proteins			GGCAAAGCATTTCAAATTCTGCATTCNNGNTCATGGGAGAGNACTNGGGGAATAGCAACGGGAGAGGGTGTGCTGAGAATGATGCAGATGATAAGAANNNNTGNAGNTATCGTATCAGGCCATCCAATGTTGTATCACCATTATTAAAATTTATGTCCTCTTTTTTATTCGTTTTATCATGAAGACCNACCATATTGAGGAANGNAGAGATTGCTGAAGCTGCTTTGAGGATTTGTTAATAAGCATTATTTGTCTCCTTGGTCAAATAGATGATGATGGTTTACCGTACCAGTAGAAAAGGGAAAGCATTCGCTTTTTTAAGGACTTAGTCTGTGTATGCTGACTCGGATGATAGTTAGTTTAAGCTGTAGGTGGTGAGAATCCTATCACCAGACTGAT…
Gma.4346.1.S1_s_at	AW309773		0	No Homology to Known Proteins			TTGGAGCAAAGTTAAGCCTTTAATTTGTTGTACAAGTTCTTTGAATAAGAGTTTGAATATATCGTCTCTAAGCTACAATCTTCACGACTCAAATGAGGTTGCTTCGATTTATTTGGTAGCCATCTTTCACATCTTGTTG
Gma.4176.1.S1_at	BG046696		0	No Homology to Known Proteins			AAACCACCTCATCCTGTACATGGTGCCGGGGAGGAACCAACCTCCATTCCACGAAAGAAGGGACCAAGAAGGCCNCCGAACTGATGAGTGAGTCAAAGGTTTCNGATTGNNCNNNCNTCAAATGGTTTAACTTTGACTCGATCTCTACCACCACAACATCACGATATGTTGTTACAANCATAATCGCAATTTGAAACCTTGGGCTAGCTAAAACTATTTTAATATAAAGTATTAATGGTCACTGCTACATGAGCGTCTATGATTAAATAAAAAGTAGGGAGTTTGAACCCATGTAATACCATGTTGTGAGGTTCTCCCTCTNTGTGTGTGCTTTAAATTTTCACATNTAGTTTGATTTGTGTCCGGTGTGGTCTCTGTTTCTTG
Gma.4149.1.S1_at	BQ473865		0	No Homology to Known Proteins			ATTCAGTACCTACACGTCATTCTACCAACGGTTTTTCTTAAATTTACATATTAGACTTGAGTGTTGTATTACTTGTTTGTGTATTTCTTTTATTAATACTAATCATTCAAACTTTATAAATTACAATGCTAACTAAATTTACATCATTTAGACCAGTGGAAACACAATATTTCTGTTGTACACTTTTTTTGTTCTGT
Gma.4551.1.S1_at	AW394473		0	No Homology to Known Proteins			ATTGCGGTTGTTAGTGACGCCACGAGCGACTTGCGGAAAATGTTACGGCTTGATTTTCCCTAATCCTGTGGCGGTTTGTGAATGAACGAGGATTTGAACGGAGGTTGTTGGTGATTAGGGCATTGTAGTGCTCGATCTTCTCTTATTTTTTCAGCGGGAAGGTCGTGTCACGAATGCAAGTCTCTTGTTGTTTAGAACTTTCTTCAGATTGCCGTACATACATGTTACTACTGGGATTAGTCTTCATACTTTTTAGATTAATTACTTTGTGATACTAATTATTAGTTTTAAGGAATAGGCTTCTGTATATCTGTGTAATGCTTTGTAAGTATTTAGGATATAGAAGCATTTTCTTCCTCTCTCAATTATGTGTCCTAGTCTTTTAAGTTTAATGTTTCT…
Gma.4496.1.A1_at	BF219518		0	No Homology to Known Proteins			GGAATCAAGCTAATATAGTCTCGCATTTTGTCTGGCAGAGTGTTAGAATTAANNTAGATCAAGTGCCTACTACTCATGTACGTGATTAGTAAAGTAAATTTTGTAAATTTTAGTTTGTTTGAGATTTTACTGAATTGAACGAGCNNGTTGCATCTGGCTTAAATAAGTTCTATGNTTGCTTTTNTNNCAATTCTGACATTGGAGTTTATGGAATATAGGAAGTGACTTGGTATACTTCAAGA
Gma.5273.1.S1_at	AI965477		0	No Homology to Known Proteins			GGTTTAATCAATTAGAGTCCAATCTCTTGGCTCTTGAAATAAAGGCATGCATTAATCCGATGTTATTTTCTTGTATTAGTGTGGTTGNNTTTGCTTNGGTCACNTTGGCTTTGTATTTGGTTGAAATAAAGATGCACATGCTACATGTATGCAATCATAT
Gma.5273.1.S1_s_at	AI965477		0	No Homology to Known Proteins			GTGGAGGATGGTCATGATCATCACCATCACTNNCNNNNNAAAAAACACTGGCCTCCTACCACACAAAATGAACCTTCGAAAGTAGAAAACAAGGATGGTCACTATAAGCCTCCCCACAAGAAGCATCCTCCTTCGGGAAATTAATTAATNTAGTGAAGCTGCTACGTACTACCATGCATGCACTCTTGTGAAAATA
Gma.5226.1.A1_at	AW830583		0	No Homology to Known Proteins			GGAACTATGAAAATCAGCCTGCTACCAAGTAGGAGAAAAGAGACAACAGAAGTTTGCGTTTTGATGTCATTTAAACCCTGATTTATGAGCTCTGTATACTGTTTTGCAAGATACGCTCTCGCTAGTTAATAAGATTGAGTTTCTGAATGAAGTCTGGACTCTGGAGCATGGGCCCTCAGTTTAGAACTAACCTTCCAATGTTCTAGAAANCTGGTTCATNCTTCAGAGATCCTTACNTGTCTCTTTTGTACAATGTCAACNNCANATGCTTAATGTGGTTTCTAATCTTCCATTTCTT
Gma.5475.1.S1_at	BU577501		0	No Homology to Known Proteins			TTGGTCTCTGTTGAGTTACTCTGTTTAATTATCTTCTTAATTGTGTTGGTTTCGTTGGTGTTTGTTCATTGCTACATAATTTTGTGATTCTTTGTTTCCCGGCTTCATTTGTTTTATCTAGATGACCATGGTTTCAATGTACGTTTAATCATATGTAGA
Gma.5242.1.A1_at	BF596482		0	No Homology to Known Proteins			GATACTATTGTCTATCAGTTTTGACTAATGTAACGGGTTCCTACAATACGATGACATTAGACTGTTTTAGCATCAGGTGTGTCCTTGAACTTGGAATCAATACAGCATTAGCATTGCTGTGGTGCTATGTTGAACACGTCAAAAAACAACTACAGTTGTACCTTTGGGCAAGAAATTTAGACAACATAATTGTGTATGGAAAGAATATCATGCGGATTTGCATAATCTGTTGAT
Gma.5584.1.S1_s_at	BI967548		0	No Homology to Known Proteins			TCCACCTTACCACTACTAGGTAGCACTTTCTCTTCACACCCCCACATGGATGCATACAGAAAGTGTGAAAATGAAAGTCATGGAGTGGGAAGATGCATCTGCAGCTTGCAGATCCACAAAGAA
Gma.5584.2.S1_s_at	BM732633		0	No Homology to Known Proteins			TAAGAAAAACGAAGTGTCAATCCCTTTCTTCTTCGTTTGTATTGTTTATGAATTATTAATTACTTTGGTTTTAGACAGTTGTATGGCACTGCTTTTGTCTCTGTCGTTGAATGATATCA
Gma.5584.4.S1_s_at	BQ610991		0	No Homology to Known Proteins			TCCACCCTACCACTACTAGAATATAGCCCTTTCATATCACACCCCCACATGGATGTATACAGAAAGTGTGAAAATGAAAGCCATGGAGGGGGAAGGTGCAGTTGCAGTTTGCAAATCCACAAAGAAGTATAAATGTTTGATTATTGTTATTGTTTAGAGGACTCTGTCTA
Gma.5576.2.S1_at	BM307580		0	No Homology to Known Proteins			CTGCATTTCTTGTACTAAGTTCCTCTTGTCTTATGGATTTTCTGATGCTCTGTTAAGATACTATTCGTTTCCAGTGATGTAT
Gma.551.1.S1_at	BU551297		0	No Homology to Known Proteins			GAAAATCATCAACCGTTAAATTCCTTTGTTTTGAAATGCATATGTAAATCATATATTGGCTATTCCTGGGGATACAGAAGAAACTTGCCATATACTGTGATGATACCAAAAGAACTTTAGTGTGGTGGATTGTTGTTTCAATTGTTGGAAGGAGTCGTCTGAGTTTAGCTTATTATTGGTGTTATCTTTCTCTTGTCTAAGTAAA
Gma.5585.1.S1_at	AW310156		0	No Homology to Known Proteins			AGAGAATATCACACGAATCCCACCCTCCCCCAGGGTACGGATCTCCTTACCCTCCACCCCAACCGGGTTACCCATCCGCACCGCCTCATGAAGGGTACCCTCCGCCGCCGCCGCCNCCTCACGGATACGGTGGGTACCCTCCGCCGCAGCCGCCGCAGCGTCCGCCGTACGACTCCTATCAGGGTTACTTCGATAACGGGCATCCACCGCCGCCTCCGCCGCCGCACTACCACTACCAGCACGTGGATCACCATCACCACCATGAGGAGCCTGGGTGCTTTTCGTTCCTCCGAGGCTGCATCGCAGCGCTTTGCTGTTGTTGTGTGCTAGAGGAGTGTTGCTTCTGATAATCACANCGTAAAAGTTGTTTCTTCAGTTTGCTGCACTTGGTTATGGCTC…
Gma.5633.1.S1_at	BM139864		0	No Homology to Known Proteins			GTCAAGGCCCATCTGTAGCCCCGTATCCCAGAAGTTCATTCAGCAACCTTCCGGGTTCTCGACCAGACAAGAAGCATGAGTTGATCAAGAGAATCCTTAATATTTCATCCCCCTCCAAATGATATCACTTATCTCTTTTTATAATTTATGCCTTTTTCCACTCCTCATGTAAAATATATTCCCTTCGTCTATGTATTATAAAATAAACGCTCTCTTATCACTTGTGTTTCNNNNNNNNNANNNNNNNTTTTTTCTCTGTTATATACCATTGAAATTGGCGCTGTTTTCT
Gma.5672.8.S1_at	BI970927		0	No Homology to Known Proteins			ACAATATTTGTGATTCTGACCAAGTTGGTTCTATTTGTTTGATGGCCATCTTGCACGTCCTGATCTTATTGTGTTCAAGTGACAGACAAATCAGAACAGGGAAGAGAGATTTGAAA
Gma.5699.1.S1_at	CD404425		0	No Homology to Known Proteins			TCTTCTTCCTGTGCCAGCCAGGTCANGTACGCGACNCTCGTCGCNAAANNAATAAAACCTGAGAAATCGAGAAGGGNTTGTGTAAGGCTGCANACNNGTTTNTTGTAATATGGGANNNAAACNGAGAAGAGGTTGTTACAGTGGATTGAGGTNAGAGGAGAAAGTCTCTCCATATTGATTTGAATTGTTATGGATATTCAGAGTTGTGAAATAAAAATGGCTGAGAAAGAGTAGGTTGCAGAGAAANTGTGTATGTATAGGGATGAATTTGGAGACCATAATTCAGGGTTGCATAGACAGTAGTGACACTTTCTGTTGC
Gma.5728.1.S1_at	AW278139		0	No Homology to Known Proteins			TTCCATGCACGAGATGCGTTTAATTTTTCTCATCACCCATCTCGGACTTGTGTATTGTTGCATTTTCCGAGAGCTGTTCCTGTTTCATAA
Gma.5755.1.S1_at	BE611571		0	No Homology to Known Proteins			AACAATGCAACTTCACCCAATAACCCCCATAATCCTACTCCTATGCCTGGAAGGAATCACTCAATTGGAAAATACAACAACAGTGGCACTCANAAGATCAAAGGTCTGAGTAACCAAACGGGCTTCACCGAAGGCAATGCTAACGGAGCCATCAACTTTGGCAGTTTACATGCCTAAGTAAATCGATGTACCAAGATCTTGAAATACATAAATAATAATGTGACGCATATATTAAAATAAGAGCTTCACAGTTTGAGTGTGGCTCCAATATTTTCAGCT
Gma.5813.1.S1_at	AW349069		0	No Homology to Known Proteins			TTATCAAGGTCCTCCTGTGATGGCACCACCGCAATATTATGCTGCTCCACCACCACGCACAAGACAAACTGGATTCCTTGAGGGATGTCTTGCAGCTCTGTGTTGTTGCTGCCTCATAGATGAGTGCTGCTGTGATCCCTCAATCTTATGTATCATCTGATGTGATCAAAATTGCTGCAAGTAGGAAAAACAAAATGAAGAAGATACAAGTACATATATATGCAGTGTGATGCTTCCAGAGGGCTTCAGTTAGCATTATGTTTAGTTGAATAGTAGTCTTACTTTTATCCAGAACTAGAACTTATGTTTGTGCTTGATTAACATGGTTTCTTTCCATCTTGGTCTTTGGTGNGGTNGNGCATCACCAGTGATTTGATTTGTAATGTGGAAAGTAAACAA…
Gma.5929.1.S1_at	BQ610446		0	No Homology to Known Proteins			GGTGATATATATTGTACGTTGTCCATTTATTGCCGGGGAATATTTATAGTAATCTTTCATTTTCCTTTGTTCTTCCATCTTGTATTGTATGGATAGGATTATTGTTTTTTCTTCCTCCTCCTTACTTCATGTACTTGGGGATCATCTATTGTTATAGGATATT
Gma.5942.1.A1_at	AW432241		0	No Homology to Known Proteins			TTATATGTTCCCCAGGTAGCAAAGTAACGAAAGCCATTTTGTCATGTTGAGTTTGATATCATTCTCTTGTTACTGTTTTGTATTGTATATTGTGAATTAAGCGTATAGGACTCATCTCTATGGAAATGGATA
Gma.5847.2.A1_at	AW349427		0	No Homology to Known Proteins			GCTAGGTGTCAGGTTTGTTGGATTCTCTCTCGCATAGTGATGCTTGCATGCATCATGATGTCTCCATCTGCCCAAGAAATCCTTATAAAGACTTGGTCTTCACACTGACATGACATTATTTTTCGGTAATTATTTTNCGTAAAGTGTCCGTTTGTTTTANATTTTGGCAGAATTGGTCTTGATTTGTTGAATATGATCGAGATGTGTGTCC
Gma.5854.1.S1_at	BM568053		0	No Homology to Known Proteins			AAGACTGGTGAGGATGTGCTTATCACCATAAGTTGGTCATACACAATCCTCTTGCAAATTTCAAGCATCGGTTTGGTGGTCACTCTTGACATTGGTGGTATAAAGTTGGGGCCATTTTCTTGTTGCCTTTTATAAGTNNNNGNNNNNNNNNNNNNNNNNNNNCTAGACTATGATGGTACCAGTGTACATCACTATTTGTCTTGGTTTGCTCTGGAATCTAAAAGCAATTTATGATACCAAAGATTTTTAATAGTTGTGTCAATTGTCAAAAGGATCTTGTGAACATTTCAGGGGATCAATATAGATAGTTCGAGTTTTTGTGTTAAAAGTGTTGATAGATTAGAGAACACAGATAGTGATTTCTCCTCACCCAAACCCCCCCAATTCTTTAGAGGATAC…
Gma.6451.2.S1_s_at	CD400221		0	No Homology to Known Proteins			TCCCCTACCCTTCCGTGATGATGTAGATAGAGAATAAAAAGAGACCAGTGTGCAGTGAGAAAGAGATTGCTCACTTCTTGTGTGGGTTTGTTTTGTTCTTTGTGTTGGAATTTGTTCATGGGTGAAGAAGGAGAAGAGGTGTCAAGAGAGAAGGAACAATACATGGGAGTTTATGGAAATGAGTGGTTGTATTGTGGTTGCTNTGCAAATTGGCGCCGTTTAAGACACCAGAATTCCTGTTCCATGCCTTTTTTCAAGTGAAAAAAAAAAANNNNCAATTACTTGTTNTCTCTCAGCTTTTCTTCTTGAGATCTTAATATACATTG
Gma.6434.1.S1_at	BQ612772		0	No Homology to Known Proteins			CAGTAATATACATGTCTAGTTAGGTGTGGAGTGGATTTGCAACCCATTCATTTCATCATTGTACGTGTTGTTAAACCTTATTATTGGAAACATCAGTATACATTTTATGGA
Gma.6470.1.S1_at	AW760032		0	No Homology to Known Proteins			GTTCAGATATTGTCCGGTCCGAAGACCTTTCTGCANNNNNNNAAANNGTGGGAGCNCGCAANCTTGCATAAATACAGAGAAGAAGAGAAGAGTGAAGAGACGAAGGATGGGGAAGGCAAAAGAAGCGGCGGTGGTGGCGGGAGCCCTAGCATTCGCGTGGCTCGCTATAGAGCTCGCTCTCAAACCCTTCCTTACCAAGGCACGTGCTTCCATCGACAAGTCCGACCCGGCACGTGACCCCGACGACGATGCTCTTCCTAAAACCACCGCCGACGACGTTCCCGAAGCCTCCGCTGACGACGTGCCTGTCGCTGCTGATACCAAAACCACCGACGACGCCTGAACTTATCTCATTCATGTTATTTTGAATGTCCTGAAAATTACTGTCCAAATGAAATA…
Gma.6389.1.S1_at	BQ610837		0	No Homology to Known Proteins			TTTACATTTGTGGTAGCATAGGAGCTTCTTTTTTCTTTTTTTAGTAGGATCACAATGCCATTGGGCTGAAGGTTAAGACCAAAATTACTCATTGCTTTCAATAAGGCTTTGGCTGCGGCTGTCTGGGTTATGATTTAGCAGCTTTCATATTAATTTGTTCCTTTCCATCTTTGTTATCCGAAA
Gma.639.1.S1_at	BU081643		0	No Homology to Known Proteins			AGAGGCTAATTAATTTGTCTAACATGTTTTTAGAGTTTTTGTGTTTAAGTGGAATTGTTTTGGTTGAGGGGGGGCTTGGTGGTTGTTGTGTAAGAGAGAATCTAAGTTCTCCTGCTGACAACAGGGTGTCCTTCGAATCATGGTGTTAGATTTTTAAAAGAATAGTTACATGTAGTAGTTCTTTGTTGTTGTAAGGTGCCATGCCATGATGACAACCCTTTGTGTAAAATTTATGATATGGATATTTCAGCTTGCTTAGGTTACATTCCTGGTCTCATTGTCTATCGCTTATCCTTGCTGAGGATTCAATTTAGTA
Gma.6337.2.S1_at	CD391354		0	No Homology to Known Proteins			AGGTGTGGAACTGATCTTAGCTTACGGAGTATTGGTAGGAATAGTAATGAAGTATTGTTCTTTTGCACTTTGGGAAGCATCTCATATGGTTCTATCAGTTCTAGATTGTCGCTGAATCCGATGCTCAGATTGTATTTTTGGTTTCCTTCAATGTTTTATCTTCTTCAATATTCTGGCAGTTGTCTTATACTTGTTTTGTTTACTTGAATTGTTAATGTGGCAGAGATTCTTTTTGGAAGATGTTTGTGCGTGGTGTTTTGTTATTTATAATTTGGCCGGGTGGGTATAATAG
Gma.6546.1.S1_at	CD392353		0	No Homology to Known Proteins			AGAAGCGTGAGAGCCTTAGTCGTTCAAGATGAGAGCTAAGTGGAAGAAGAAGCGCATGAGGAGGTTGAAGAGGAAGCGCCGAAAGATGAGACAAAGATCTAAGTAGGTGCTTGAGCAGGAGTTGAGATGAGCTTTCCATCTGCTACCAGCCTCATGACATTTTAGGCTGTTATGGCTCTTATGATCTTGAGGTCTAGTCGCTAGGGGAGCTTCACTCTTGACTTAGTTTGCTTTACTGGTCCTGGTCCTGGTCCAAGACTATTGAGTGTGGGTTAAGTTGTGATGTTTAGTGTTTTGTGGTATCTAATTATGTACTNGTTTTTATACTTTTTGGTTGAATAGCTATATATTAGTATCGAGACTTCCATGAAAANNNNANNNNANNGTATGCTTGAAGTG…
Gma.6573.1.S1_at	BI941802		0	No Homology to Known Proteins			GATCGGCCACGGCTACGAGCAAGTTGAGATGCCGCACGGTGCTATGGACGCCAAGGACCCGAACTTCGAGGATCCTGTGGAGATCGCCACCGTGTGATCGCGGTGGTTTCCGGTGGCCAGGTCTGTAAATAGTAGTAATTGGCGAAACGTGTTTTTTCGTGTTCAATAATGTGAAGCGAATCGGAGA
Gma.6605.1.S1_s_at	BM139615		0	No Homology to Known Proteins			TACTGTTATGGTTGGTTGGTTTCCGTGTTACTCCTGTCCTGTGGTTCTCGTTTTTG
Gma.6187.1.S1_at	BF324343		0	No Homology to Known Proteins			GAATTTGGTTCTTCTGTGCAGAAATGCTAAAAATTAGTATATCTGAGCAATGAGTGAGAGAGGATACAACTTTGGCAGTTTAAGAAATAATTGACAGAAAGCAAGAAAACTCATCTGCTCATGCTGCTCAAGTGATTTGTTCTGCAACATCTTTTACGCCTTGGTCTAGTAGAATCCCAATTGGTGAAGGATTTTATCAATTTCTTTAGTTATATGCTTCTCACTATGACATTTGCACATTATTTGGTTGATTAATCTTCACAAAAACTCTACTTTCTCGT
Gma.6296.2.S1_at	CD392554		0	No Homology to Known Proteins			GCTCCAAGCACATGATGCCGTTGCAGTTCAAGGCGCTACCCTAGAAGATGTGTATGAAAATTCTCGAGTGAAATTTTCTCTATCTGTAGCTTGGATTGGTAGTTGTTTTAAGTAGAGACGTTCATGTGTCTCTCCCGTGTTGGCTGAACATTTAGCGCGTATTATTTACCAGAAAAAATCTCCTTCTAGTTGTTGACTTAGGATATTGTATAATTGAGATATTTTCATGCTTGAATGGTGGTATCCGGATTTCTATATTTTTATGTTGCGTATGTTTTGAANNNNNNNNNANNANTGATTCGGTATTCTCTAACATGGAAGTGAAAACTTCCAAATTGCCATGNANNNNANANNNNANANATGAGTGTGTTTGCATTGGTTAGGAAA
Gma.6274.1.S1_at	CD392870		0	No Homology to Known Proteins			TTCCTCTCAAGTCGTAATCATGACAGCAATGGCGGTCCTTCTCGCCGTCGTCTCCGCCGCTCACGCCGCCGATGCGCCGGCACCTAGCCCCTCCTCTCCCGCCTCCGTCATCTCTCCGTCCTTCGCCGTCGGTTTTCTCACCGCCGCTGTTGCTCTCGTCTTCGGTTCTTCTCTCAGGATCTGAACATGCTGCGCTCCGCCCTCTGGATTTTCACTTTCTTTTCTATTTTTTTGTGTGGATTTATCAGAGATCGAGGCTTGACTAGTAGTAGAGTATAGTTTCCCCTGTATTGATGTGCAGAGATTTCATGTGTTCGTTTCA
Gma.6280.2.S1_at	AI938985		0	No Homology to Known Proteins			ACTCACTGAGTACCCGTTAAGCAAGCACTACTGTCGGTATAGTGTGGTCTAAANNANGTTGAATAACATCTGGATTGACACTTCAAGCTTCAATTTCTTGCTTATGAAAATAACCCAACATTACTTATATGGGATTTCAAAAGTTGTTTTGCACTCATCCATATAGAATCAAAACCAAAAGTGTTTAATTTTATGTGTTCATAATGTAAAAAAGTTTGTACTATCAACCAATCAGAAACTTATCACACATGACAGTTTTTGATTGAA
Gma.6262.1.S1_a_at	CD416257		0	No Homology to Known Proteins			TGCAAGTTCAAGATCAGTATCGAGGTCAAATACTCCAAGGTCTACCTCTCCTTCAACTTGAAATTTGTTGGTCCTATATGGCTT
Gma.6333.2.S1_s_at	CD396361		0	No Homology to Known Proteins			ATCGGCAACGGCTACGAGAACGTCGAGATGGAGCACGGTGCTATGGACGCCAAGGACCCGAACTTCGAGGATCCAGCGGAGATCGCCGCCGTGTGATCGCGGTGGTTTCCGGTGACGAGATCTGTACATACTAATAATTGCTAAGAGACGTGGTTTTCGAATTCAATAATATGAAGCAAGTAGGAGAAGAAGCGCTTTCTGTGATTGATTGTTATAGATCTGATCTGTCTCTGGAATTTGGTAGTGGCATGGCACTTGTGTTGTTGTACATATATCGAATGGTCTTGGAAGTGCGTGCACTCATATTCGCATTCAAG
Gma.7098.1.S1_a_at	BU544552		0	No Homology to Known Proteins			AGAGCAATGTCTATTTCCCTACTAACTTCAGAAACTGCTCACGGCAGCAAGGCATGTATCAAATGAAGAAGAATGTGTTAGAATTGATAAGTATCTTCGTTGGACAAACTATACATTGTAAAGTGGCTGTTTGGTTGGTTAGCATTTGTATGCTTTTGTACAAGTTTGTTTCTACACTGTTTCAATACCCAGTGACAGGGTTGAATATGCTACCTTTCTACTTTGACGATTGATTTGGAGGCTCTTGATCCTGATTGGAAATC
Gma.7185.1.S1_s_at	AW471611		0	No Homology to Known Proteins			AGGCATTCACGGTCTAGTAACTTGTCATTGTTTGGTCTCTAGAGACCATGAGCCCATTGCCACGAGGTTGTATTCTACATAATTATATTCG
Gma.719.1.A1_at	AW133378		0	No Homology to Known Proteins			ATGCCCTTTAGGTTACCCGTGCATTTTATTTTATCAGTTCTCAATGTCTAACCTCAACTGGCTGATCGAATTAGTGATACTTTT
Gma.7266.1.S1_at	BI969207		0	No Homology to Known Proteins			TAAGCCAGGCCTTTTTTTTTCTATGTTCTATGGCCTCTGGTTTCAGCCTGTCTCTGCATCTTACATCATTTCAAGTATGACACTGTTCATTGTAAGTTCAAAACCCTGGTTTTTCATGTTGAGCACACTTGTCGAGGGAGATTTATTCAGACCAAAGATTATATGACTACTGGTCTATGTCAAAGGTTGACTTGCCAGAGAACATGATTCTGTATTGGCTGTGTAACTAAAACCAAAGCATAAACCCATCTATGATGTTTTCTCCTAAAGTAGTAGACCATTTTATGTTGCTGGAATGGTTTCT
Gma.6627.1.S1_s_at	BQ629303		0	No Homology to Known Proteins			AAGATGCTATAGATGAGGACGAAGATGAGGAGGTTGATAGGTTCGGCTTCTGATGTGATTCGTCACCAGTTGGACTGCATCAGAGCTAGATCTTTGTATAGCACCTTGACCTTCAT
Gma.6629.1.S1_at	BM523674		0	No Homology to Known Proteins			GTATTGGGTCTTTGGAACGTGATAAGGAAGATTTTCTGTTGTTGTTGTGAAAGAGGGAAGACAATGAAGGCTCCAGGGAGGAATATTCGCATTTATAGAGATGATTTTGAACGTAGCCCTAAGAACTANTTCCGTAACTTGCGCAGAGACCAACGTAACTGGCGCAATAATCAACCTCATACGATTTTGGTTTGAAATCTCAAACGTGTAAATCCACGTCAAACTAGAAGCACCTTTCAGTTGCTTCTGGTGAAACTCNTGAAAAAATGAACGTCGTGCTGTTTTATTATATTAAAGCTTGTCTGTGTTTGTGTATATGGTGCATGTTTGACGTGATTTCGGTAGATATGGTTTGAACAAATGGNNANAAAGATTCTGTTATTTGTGTTNCACTACATG…
Gma.6676.1.S1_s_at	CA819837		0	No Homology to Known Proteins			TTGTGGTCCTTTCAGAAGATGATTGGGAGCTTAGTATTCGGATGTGCTTTGCTGTCCTTGTTGTTCTAGACATCATCGATCTCTGTCTTCGGACTTGCAGATTTTTCTGCCAATTCATGTTATTTTTCTATTTACCTTACCTTTATATATTATTATTTTGTGGATGTGATCATGGGAGTTTATTAATTACTGTATTTGAATTATATACGTACATTGCTTGCATTCTTGGGAGATTTGAGG
Gma.6920.1.S1_s_at	BE610331		0	No Homology to Known Proteins			TTAGCCCGTGCCCTCATATGTGTTCATCAAGCCCTGTGTGGTTGTTGCTCTAGCTCATTGCCTCATTTCTATTGTCATTGTGTCATGATATCAAAGTCAATAAATTGTCAAATAGAAATCATCATCATGATGACTCTTAAGGTACAGTCAATA
Gma.6758.1.S1_s_at	BU760603		0	No Homology to Known Proteins			TGCTGCTGTTGCCTGTTGGATGCCTGCTTCTGAGAAAGAAAAGAGAGGTTGCTTTGCACAAATTGGATTTGAAACTGTGTTTTGACTTTGAACATGACCATTATCGCTCTTAGTTTTTATTATTTTCTATGTTGATTTACATTTCGTGGATATGAAATATTGTTCTGCTTCATTAACAGGAGGATTCGTGGCTTTTTGTT
Gma.6758.2.S1_at	BG155059		0	No Homology to Known Proteins			ACCCACTATCCCAATTCCAATAAATACCTTCCTCTCTATATTTTCGCACAATACCCTCTCACCCTTCAACGATGAGTTACTACAATCAGCAGCAACCACCCGTCGGTGTTCCTCCTCCCCAAGGTTACCCACCGCCGGATTCTTACGGAAAGGACGCGTACCCTCCGCCAGGGTACCCGCCGCAAGGAGGATACCCTCCGCAGGCGTATCCAGCACAGGGGTACCCTCCACCCTACGCGCCTCCTCAGTACGCTCAGCCTCCGCCGCAACAACACCAGAATTCATCTGGCCCAGGTTGCTTAGAAGGATGTTTGGCTGCTCTCTGCTGCTGCTGTCTGTTGGATGCGTGCTTCTGAGAGGAGAAGAGGTTGCTTTGCACAAATTGGATTTGAAACTGTG…
Gma.6883.1.S1_a_at	BE658807		0	No Homology to Known Proteins			GGTTTTTGGTTGTTATGGGATGCTTGTGTAGCTGTCTTTGTTGGTTAAGAA
Gma.7991.1.S1_at	CD392638		0	No Homology to Known Proteins			GTCGCAGGGTCGAAAGTCCTTCTAGTGAACAGAAGGGTCCACTACACCTCAAAGGTTTCCTCTAACCGTGCCACGTGGTCTAATGTTCTCGCAGTTTCTGCCGCTGTATTGGTCTCAGCAATACTCCTTGTTAATATATGGGCATATGTCAGATCTTAAACTGCTTACATGTAGTGGAAGATCATTTCTTTTGTGCGAAATTTGCCTCCATTGCTTTTTTGCCCGGTTAAG
Gma.8005.1.S1_at	BI426427		0	No Homology to Known Proteins			TGAAGGTGGCATTTCCGCGGTCTAATAATTAAAATGTGCCATTGTTTGGTCCCAAGAGACCATATATTGCCCGCTCCTGCCATGTGCGAAGTTGTATTCTATACAAGTTATAATTATGCTCGTGATATTTAACTTAGGTATTTAAGTGTGCTAATTTGGTGTACGACGTACAGTACCCTTTTTATCAACATTCTT
Gma.8185.1.A1_at	BU548568		0	No Homology to Known Proteins			TGGGCCAGCAAAGCAGAAGCATAGCTATAGTGGGTGTACATGTTTTTGCGCTCATAAATTTATGTGTAAAGTGTAAATTGAAGATGAGAGAGAGAGAGAGAGAAAAAAAGAATACGAGGTCCCATAGCAGTTTAATGAAATG
Gma.8149.1.S1_at	BQ629660		0	No Homology to Known Proteins			AACAGTTGCTGCCATATTCACCAATGGCTTTCTCCAAGGCAATGTTTCTCGCCGCCGTAATGTCGGTGCTCGTCGCCGTCATCTCCGCCGCCGAAGCTCCAGCTCCGAGCCCTACGTCTCCCGCCGCCGCCGTTTCGCCGTCCTTCGTCGCCGGTGTTCTCGCCGCCGGAGCCGCTCTTGCGTTCGGATCTGCTCTGCGGATCTGAACGTAGCTCATGGATTTTCTCGTTTACATGCGTGGATTTTTAGTAGAAGCGGAGATTTGAGCAGCATTAGTATATAACTCTCTCTCTCTCTCTCCCTCCCTCTCTCTCTATATATATTGATATTGCTATGTAGAGATTATTACTACATATGTTGATTTCTGGATCTATATTGCGTTTATGGTTTGAGTAGTAT…
Gma.8366.2.S1_at	CA935791		0	No Homology to Known Proteins			TAAATCTTCGGTTTATTGTGTATGAATTGAGAACTGTAAATTTTAAATAGCATATTCACTGTTGCTCACATTGTTCTGTGGTGTCCTCTTTATTATTCTGGCAATGAGAACACATCCCTTTTTGTTCANNNNACTGTAATATTATTTACTTGCACAATTGAGATGCTGCTGTGAAGTCTTTTTCTGAACAAAA
Gma.9774.1.S1_at	CA935566		0	No Homology to Known Proteins			TGCTGCTCTATTATCAGGAATTATATTCCTTCAACATTTTAGCCCTTGTTGTGTCTTTGCTGCTACATGACCATTGTGCTGGGAGACCAAACTATCAGAGCAAGTTCCATGCACCAAACCACAGATTTTGGCTTTGGAAGTCTGAATATATTGGTGTATGTGAAATTATTAATATCATTATTTATAAAATATATAGTTAAATTTTGTATGTCGTTTGAAACATTCTTGCAACT
Gma.9776.1.S1_at	AW734330		0	No Homology to Known Proteins			GCTTCTATGATTTCATTGCCGTGGATTGTTTCTCAATTGTGAAGAATTTTGATGTTGACAAGATTCTCCGTTCTACACTTGATTGATTGCTTAGACGAGTCACTATTGTGACTTGAAATGAATTGAACAACATACACAAATGTATCTCCACTTGCTCAGTTGACATACTATTGTTACATGTGGAGAGTACAATGTGAAGTCAACTGCCCTGATTGCTTGTAGTTTGCAACCGAAAATCTTTATATATATTTTTTTGTTTGTGTACCGTCTTCCTTNNNNNNNNNNNNNNNNNNNNNNNNNNNNNNNNNNNNNNNNNNNNNNNNNNNNNNNNACCCACTTATTTTCTTACCGTTCATGATGATGTGAAAGCAAGGCAGGTGTTGTGGAGTGATCTCAGGT…
Gma.9797.1.S1_at	CA936781		0	No Homology to Known Proteins			AGAAGCGGCAGTCACACCTATTCTATAGTTGATATCATCAATCTGCACTCTTTTTTTTTTTGTATGCGTGTAAGATATTTTGTATTCCTCTCTTCATTGTTTCATTTCTTTTGGTCGCTAGTTATTTCTGATGTGTGCTTCCTGTAATCTCCTAGGCATATTTTAAAAATGCCATTTCGTCTGTTTGTAACTTAAAAAACTACTAGCAAAACGCTGGTGCACGTGTCATTGTAATTTTTCGCTAAATTG
Gma.8738.1.A1_at	BU764151		0	No Homology to Known Proteins			ATGATCTATATTTTCAGTGTGCTAATACGAAGCTTCTAATGATGAATGATATATGGGTTTGCACCTGCCCTGATGAGTTTGGTGATGATTTTTGTTTCTATTACGGGTTTGATATATTTTTGTGGAACATACGTCAGTTTTACATTTGGCTACACAGTTGTGCGGATGCGTTTGTCTCGTATATAGTAGTTTCATTAATGTGGAGTGCTCAGCAGGTTGTAATGACATA
Gma.8787.1.S1_at	BU765191		0	No Homology to Known Proteins			ATTAAGGCCTCTCCACTCCAAGTCATTCTTACACCACGTCTTTCTGGTCATATTTATGATGAAATTTAAATACTAAAAAAATAAGATANCATGTCATGCATGGATAAATTAGGAATGCTTGGCTTTTATCGTTTTGAATAAATTACGAATGCTANNATTTTATTATTTAAATAAAATAGGAATATAAAACCTGGGATTAAGGAAAAGATTAGTCAAATCCTGAGTCATGGGATTCCTTTTTTATTTTTGGATTCTAATTTCTTATGATTAAGGGAATTGTCTCCCCCTATGT
Gma.8961.1.S1_at	BU765186		0	No Homology to Known Proteins			TTTCTCTTGTTTTGGGTAGTTCTGTGAACAGATAGTATTAATTTGTTATGTGTATATTAGTTGGTACTTGGTAGATTAGAGAGGGACTTGATACATACTTAGAAGATCTCACTAGCTGATTTCACACGTTTTGAAATAGTCTTTACAAGCTAAATCTTCTTCAATTCCTTCATTGAAGATTGCTTTGACTTGTTTGCAATCTTTCTGTATATCTATAGGACAAGTAG
Gma.9083.1.S1_at	AW307396		0	No Homology to Known Proteins			ACAACAGGCGTATTATTCCGCTCCACCAAGTGGGTATCCTTATANNNNGCCACCGCAGCCTTATAATGCGCCGCCTCAGAGTGGCTACGGCTATAATGCGCTGCCGCAAACGGCGTCGTATGGGCAGGGGAGCGGTTACGGGTACGCGCCACAAGAGGAGAAGAAGAAGAGTAAGTTTGGTGGGATGGGGACGGGATTGGCTGTGGGTGCGGTTGCTGGGGCTCTAGGTGGAATCGCACTCGTGGAGGGTGCTGAGTATGTTGAGGACAAGATTGAAGATGACGTGGCGGAAAGAGTGGAGGATGATCTTGGTTACGATGGTGATGACTTCTAGAGAGTGGTGTGATGTTTCAGGAGGAGGAGGAGGAAAAAAAAAACAAGGAATAATAATATTTTAAG…
Gma.9194.1.S1_at	BM526746		0	No Homology to Known Proteins			CCATTATTTTTGTCTAAATACCATGTTCTGTGATGCTGGATGGCTGCAGTTGATCCGTCAGTATATGTATTACCTTTTGATTCTCTTTTGCCAACTGGTGGATCCTTATTTCCCCAGGTAAATATAGCCTTGTTTATTGTAAACGTCTACAATGTCATATAGTAAGTATATTTGACTTGAAATGGTCAGATCAGAACTCAGAATGCTTCTGTAATGGGGAAAACTAAAGCCTTGGCTGGAAGGAGGGGAGGGTCGAGAAGAGTTTTTTTNGATGGTGGGGGTTGTTGGTTGGGTTTTGTTTCCTCATGTTAATATGTGCCTCATTTACAATGTTGCACAATGCTCAGCAGTTCCTTTCCT
GmaAffx.18610.1.S1_at	BI787904		0	No Homology to Known Proteins			ATTCAGGCAATGGTGCGTCGTCTACTGGTGGAAGCTTATCTGATGGCGACTTGGAAGTGTCAACTGCTGATTCTGAATCATATACAGGGAATGTTTTTTCTCCTTTGGATGTGAATGTCAATGTTAGTGTTCGATAACAAAGTTCTGGGATTATCCAGATTATAGAGATGTAACTTAGTAAGCACCCCTTCTCTCCCCTTTTTTTTCTCTCCAAGGAGAGGATGGGGAAAAACAAGTAACATTTGATGTGGATGTAAATTAGTTGCCTTCAGGATGTTGGAACTTGGAAGAGTGGTTTACTGAGCTTCTTAATTCAAA
GmaAffx.1790.1.A1_s_at	CD412488		0	No Homology to Known Proteins			TATGTATGGGTGTTTTGTTTTGTGCTTGTGTAATTTTGTGGTGTTGATGTTTGTTTAACTAGCATTTGATGGGACAATCAGCTAATTTAGGAGGGCTATATACCCTACAAACAG
GmaAffx.20840.1.S1_at	AW156235		0	No Homology to Known Proteins			ATATGGTGTTGCTTTATTGGTTTAATGTATTTAACATAAAATTTTAAACAAGGATTAACGGTTGTAAGTAGGATGGTCAGATTTTCATTTTACTCGTTGCAGTGGCTTGTAGTCAGTTCTTAGTTCTTAGCGCTTTTATTGGTAGTGTCCTTTCTTTTCTAAAATTATGGTANGGTTAATTAACTTTTTAATTCCTCATCATA
GmaAffx.19541.1.S1_s_at	BQ612990		0	No Homology to Known Proteins			GGAATAATTAAGACCACTCCAATTGTATTTGGACCTTTCTGATGGTGCTTGATGCTACTACTTGTAATATCTTCTTTAACTTAT
GmaAffx.23152.1.S1_at	BI701453		0	No Homology to Known Proteins			TTTTTCTGAGTTTCTTTTCTTGTCTTATTTCCAGAAACGTGGAATGTCAGCGTTTTATACTTCACTTTTACTTCGCTTATTTTTTTATTTATGTTTTGTGCTGGTCTTTGCTAGGTAAGTTCACTTATTGTCCAAGGTATGCAGTGTAGCGTTCACTTGTTATTTTTCATGTAATCTGTATTTGA
GmaAffx.23184.2.A1_at	BG651576		0	No Homology to Known Proteins			GATTATTAAAGCTCGTACACATGTTTTATTCCNNNNTGTGTTTACAGTTAAAAAGGTATGAACAATGGTCATTGGTTGTCTTTTTCTTGGTTCCTTTTTATATTTTTAAGTTAGTCTCTTGGCTCCTCTAATAGCAGTAGCTGAATGGTTTCTAAGAAAAAATTTCTAGTCTAATCTTGTGTAATTGAGATACATGGGTTTACTCTTAATGTGCTTGACGTATCGATGATTACATGAGGTAGTTTTGTCAATGACATAACGGCTGATGAGGGCAAACCTTCAAAGCTCTTTGGNNANANGATGAGGACTGAGCAGCCATTGTTGTT
GmaAffx.23289.1.S1_at	CD392087		0	No Homology to Known Proteins			AAGTAGCAACTCTGTAGCCTCTTTTCCCATCATCTCCTTACCTCCTCTTTTTTCAAATTAGTCCTGCAGAAGAAGATCATCATGAGGCGCTTAAAGTCAAGAACAACACCACTTTTGTCCAAGTTTGCGCCGTTGTTGGAGCCATGGCCAAATGATGCTATAAGAAAGGAACTATAAACCTGATCAGGACATTTGACCTGAGGAAACATGCCCTCTAGGCAAGTCTGATGCTTGGCTTTTCATCTCTGCTGTTGAGAATCAAATAAGGCATGGCTCACGTCATGAAATTATTTAGCATATCATATCTGTTTGATATTAGTATAAGTTTTTCTGTTTACTACCTCTCCTCCTTCCTTTCCCAGTTGGGACAATGATATGTTATGTATATCCTTCTCTGCT…
GmaAffx.23292.1.A1_at	BI967795		0	No Homology to Known Proteins			CTACCCATTATCCAAAAACGCCAAGGCCGGTGGGCCTGGGCCCACCCCCACCAAGGTTCCGGGTACTTTGATTTGGCATAAATAACATATACATATATCACTGAGAGCTTCATCGGGCCTAGGCGGAAAAAGCTTGTTGTTACAGTGCTTCGGGTTAATTATATATCTTGTACTCTAGTCTTTTTTTTTCTCTTCCGATTTGTTAGAGTAAACTGTAACAGTAGCTGTTCTCGTAACGTCTGGTATATTGTTAATCTGGAAGTGTCTGAACGTGTTCAT
GmaAffx.236.1.S1_at	AW306854		0	No Homology to Known Proteins			TTATTACCAGCAGTTGAAGCAATCTGCTTTTCTTTTTCCCATTCTTTCTATAATAATCTTCGGGAGGTTTTGATGGAGATTTAGGTGGGCCTGGATACAGTTGGTCGTTTTAGATCCCGGGTAGAATATTTACATTATTATTTATATATGAAATGTAAGGACATCCTGCCATTCAGGATATGTTGCAGTTGTATGCCTTGAATGGGCTTTTACATAAATTTTGCTGAGCAAGTGTTAGATTCTTGTGCGGGATGGCAATATTGTGAATTTTAGATATTGCATTCATATA
GmaAffx.24872.1.S1_at	CA935146		0	No Homology to Known Proteins			CTTCTTGATGATTTACCGATTGGCTAGAACCAAACTCATCCAACTTTGGTTCAGTATATGGATGGCTGCTTGGTTGTATAAGTCTGATTCAATTAT
GmaAffx.25368.1.S1_at	BE657690		0	No Homology to Known Proteins			CGGTGGAGAGCCTGACGACGACGATAACGATGACGACGACGAAGATGAAGACGAGGAGGATGAGGAGGAGCAAGGGGAAGAGGCGGATTTGGGAACAGAGTACCTTATCCGCCCTCTAGTCACTGCTGAGGAGGAGGAAGCATCTAGTGATTTCGAACCAGAGGAGAATGGCGAGGAGGAGGAAGAAGATGTCGATGATGAGGATGGTGAGAAGTCTGAGGCTCCACCAAAAAGAAAGAGGTCAGATAAAGATGATTCAGATGACGATGATGGCGGTGAAGATGATGATGAGAGACCCTCTAAGAGGTAGAACTGGGTCCATTCTTTGCTTAAGGGCTCAGACTAGTCAACTTATCTCCCTTTGCCCTTTAAAAACATTTCAGGGACTTGTTTCATTCT…
GmaAffx.25369.1.S1_s_at	AW100848		0	No Homology to Known Proteins			CTCTTATTAGTCTTAGCAGTATCAGTATCCCAGGGAAATCCATCATTTTCTTTTTCTTAGTTTCATTGTTTTTGTAACTTCTAGTACTCAGGATGTCCATCATCATTTTCGTGAGTATGTACTACGAATCTACGATCGTGTTGACA
GmaAffx.25581.1.S1_s_at	BI699942		0	No Homology to Known Proteins			GTGGATATTACCCTTGAGGCTTAATGAGCCTACAATAAATTCCAATGTTCAAAAAGAATATCTAGCTCATCGTAACCATACTAGTACCAACAATAAGATATGGGTACGAGGATGCTTATAAACTAATGAAATTGAAGTGTAACATGTCCTTGCATGTTGTCAA
GmaAffx.24570.1.A1_at	BU764146		0	No Homology to Known Proteins			CCTCCTTTTGTATTTCGGTCGTCAGCAATAAATATACAAAGGTTGTTTCTTTGTTGCAGATTTTCAAGAACTTTGTCGAACTTGAAANAATTTGCTNAACCTTCGAGCCTGTATTTTTTATGTTAATGTTGCTTT
GmaAffx.28214.1.A1_at	CD414400		0	No Homology to Known Proteins			CAGGTACTGCTTAGATGTTGCTAATGTTTTAGATTTATTCCTTTTTTTTTTGGGTTAGTCGATACCCGTTTGTGGTGAAACTCGTGAACTCTAAAAGAGTGTTTACGTCAGCTTCTATCAGTGAAATAGTTTTCTTGTTTACATTT
GmaAffx.28382.1.S1_at	BM528798		0	No Homology to Known Proteins			TAACTAGTTAGTGGCTTAGGCATTCTGTATTGTGCCATGTTGGTGCATCGTAGGTATTCACTAGTTTGGTCTTGTCAACTTCTTAATGTGGATAGAATTATTTAATATTTGATGGGTTCTGATTCTGAACGTCTCTAACATTTGTCCTGCATTGGGATATTTATGT
GmaAffx.28517.1.S1_at	BM954423		0	No Homology to Known Proteins			AATCACATTATTGCAAGCTCCTTATAGTAAACAATGTTTTTGAGAAATTCTTCTCAGACTAAATTATAAAC
GmaAffx.28989.1.S1_at	BU548047		0	No Homology to Known Proteins			GTTTTATTTTACACAGATTCAAGAAAGGAAAAAAACAAACAACAGGTTTGGTTTGGTTTTCGAGGCAAATATGGAAATGTCATCGTCCTCTCTGGGCAATATGCCGGTTCGGTATTGTTTTTTTAGTTGCTAGATCTTCTTCACGTTGCCAATGCGGTGGGTAGTTAATTAGTAGATATGGGNTTTGAGATTTGAGAACAATTATGTGTTACTAGAGCTAGAGTCTCCAATCCTTTTATTATTATTATTATTATTATTTTCTTTTATCTCATTCCCGTTTTCGGTGGTTTTGTTTTATGTTATGTTATTGTAGGAACTCGATTTATGGAGTTTACATGCTTCT
GmaAffx.29357.1.S1_at	CA803053		0	No Homology to Known Proteins			TGTCTTTGCCATTATATGGCTGCACCGTTGTCTCTTGTAACTAGGGTGTGGCTTGCCGATCGATAAAAAAAACTGGTGTGTGGCTTCAATAAATGGCCTTTGTACATACATTTCTAGTTGCAACTTGCAAGTGTTTCATACTAA
GmaAffx.29360.1.S1_at	CA935299		0	No Homology to Known Proteins			TTTTTCTTGTACTCTTACTCCCATGATTAATATATTCTTCTTATGATGTTGCATATATGATGCTAGTATATGCACCTTCCATTGTCATGTGG
GmaAffx.29360.1.S1_s_at	CA935299		0	No Homology to Known Proteins			ATTGATTAATCTCGCTAGCTCCTACCACTTTGTTATGCACTTTATTTAATTTCACTGTGATGGACTCTTTCGTTATTATATATATCATGTTAATTAATTACTAGTTGTCTCCTTTGTTCTGTACTCAATTCTTATTTTCTGTAACCACATATGTGGAACTTTTTCTTGT
GmaAffx.26583.1.S1_at	BE801555		0	No Homology to Known Proteins			ATAAATTTCCACGAGGTGGTCACGTTGACATGAAGCTAGCTCGTTCTTTTTCCATGCAACATTTTACAATGTATATTCAATCCAAAAATAATTTCAGAACTGATTGTTTCGAAGCAAGTAGTGTTGTTTATAGTTGTAATATCCGGTGTCTATAAATTGTGATTCCTATCCAGCCAAAAA
GmaAffx.24129.1.S1_s_at	BQ610397		0	No Homology to Known Proteins			GAATGATTCCGGGTTAGGTCTTTGTCTATGTTTTAGTGTTCGTCCAAGTACTATTATTGATGTAATTCAATTCTATTTGTATCTCA
GmaAffx.27061.1.A1_at	CD396141		0	No Homology to Known Proteins			AGGTGTTTGAGATTGTGGCTGACTTGTTGCTTGTGGCGGTCAAAGTGGTGGATGGTGGGCTGGAGTTTGAGGAGCTTCATTGGGATGATTGGAGAATTGGCCTTCCAGATCTTGTTCTCTCATGGCATGATGTTGGATTGGAGCTTTAGAGAATACAGTCTAAGGTTTTGTACAGATGGTCCTAGTAGTCCTTTATGTTTATGTGTTTGGTTCCTTT
GmaAffx.27321.1.S1_s_at	BG551437		0	No Homology to Known Proteins			CTCAATCATACTTGGTAGTCCAGTAAATTCCAATATCAGGCTTGTATTTGAAATGGGAGATACTTGTCTTTAGTATATTATTACTATTATTTCATTTGTTTTCGTACACAAACCCTGTATCCAAACT
GmaAffx.33417.1.A1_at	AW348567		0	No Homology to Known Proteins			AGGGCGTGGACTTGGTCGTGGCCGAGGTTCTTATAACAATAGAGGAGACAACTCCAATAATGAAAGGCAGGACTCTGGTTATGGGGGCAGATGGGGTTCTAATAATACAAAGGATTCGGATGATGGTTTAAGCAATTTTCCAGGGGCCAAGGTTCANAATTCTCCTGGAAGGGAAGGGAACGGATGGGGATCTGGAAATTCTGGCGGCCGTGGTTGGTGAACTCACCTCACCTGTGAGAACTTAGTTTAGCTTTACCCACAGGCGGTAGGTTGGTCATTATGTAATCCTCTTTTTCCCACTGAAATGAATGGATGATGATATTTGGGTAGTTTATTTTTGCAATGTAAT
GmaAffx.33081.1.S1_s_at	BQ453706		0	No Homology to Known Proteins			CTAGGCTACTTTTTTATATTTGTGCTGGTAGAAAAGAATTTCTTCTTTTGTTGGCATGATATACTCTACCAACTACTTGAGCT
GmaAffx.33119.1.S1_at	BQ611020		0	No Homology to Known Proteins			AGAGTTAGCTTCAAGAGTGTGTTGTGTTGTGTTGTGCCTATCCCTGCCTTATTCTAGTTCTTTTTTTCATATATATATTTGAGGAGTAAGTACTTTTGATTGAGTCAAGCTATTTATCTGATTCGGTTGCTTATTGATGAGAGGCAAATATCAAACTGTATTTTCATCTGTATAAGTATGATTCACTG
GmaAffx.3329.1.A1_s_at	BM139593		0	No Homology to Known Proteins			TGCTCCACTCCCTCGGTATCAACGACATCNCCGGCATCACCCAGGTTGATCCTGTCCCTGTTCAGCAGAACTTCCCCTTCACCAGGAGGTACTGATGATGATGGAGGCTCTTCTGCTTTGAGAAATAAGACTTTGTTTTATGCTTCTCGTTTCGTGTTTTCGTGGTTTTTATTTTATTTTATTTTATTTCTCAAGCCTTTTAATTTTTGTTGTTGTTGCTACTGCTGCTGCTTTAGATTAGACCGAGTGGAATTATTATTAGGGTTTTTGGATTATAAGAAATGATATACCGTTGGAGTC
GmaAffx.30151.1.S1_s_at	AW317339		0	No Homology to Known Proteins			GTTGACGTATTATACCTTCCTTCCAGTGTGTTTAGACTATTACTGTGATGTGAAGTCTTGAGCTTTATGAACTGTTGGTCTAAGCTTAATGTGAGGTCTTTGGCTTTGNANNNNTAATAATATCCGTTATNTTTGAGTGTGTTAAATTATTTCCTTAGTTTGAATGAGTTTATGTGCCCTGCATCATGTAATTTTACCTTCTAATTATTACTGGCTAAG
GmaAffx.30662.1.S1_at	BE023739		0	No Homology to Known Proteins			AATGTTCAACGAATAGTGATAATGATGATTATTGTGATTTTTGAAATGTGATCTAGAACTTGCACTTGGCAACGTTAGTTTGTCATGTTTTTATCTCATGTTCGTTTGTATGGTTGAAACAAAATAAATTTGTCAAACAATATGATGCTTCTTTTTATGCCGATTCTTGTTCAGTAAGATTTTTAAAGAAAATGATCTTAAGACCCCAGACTTTTATCAA
GmaAffx.31029.1.A1_at	BE659140		0	No Homology to Known Proteins			AAGCTACCCAGAAATTGCCCTTTTGATGCCAAATATACACCGTCATGAATCTTATTTAAACATCTTATAAGCTTCTATAGGATGCCAATTAGCA
GmaAffx.27492.1.S1_s_at	AW350702		0	No Homology to Known Proteins			GAATACTTCATGTAAGGACTATATTTATGGGNAGCACACGACCTAGTATAGTGCAGTTCGGTACTTGTGTTCTTGACCCGGTTCCTTGCTTCCACAAAATTATAACCGATAAAATCCCCTTGATAATGAAAGTATGTTGGAATGTTTGTCCATTTCATACCAACATTATCTGTGTTGTAGCTTGTTTTAATGGTTGTCTGTTACTAAGTTTGGAGAGATATAAGTCAAAAGTGCAAAGTATACACATATCCATATTTTGACCAAATGATCTTATTGTAGTTTGCTGTAAGATGTTTCGGTCTA
GmaAffx.27505.1.A1_s_at	BI273666		0	No Homology to Known Proteins			AGTGGCAGGATGCTATATTCCACGGGGGCTACTAGATATCTGCCCTATTTTTTTTATACATTTAGTTTTTTTTTGGGTGCATTGAATCTGTCTTGTTAGTCTGTGTTGTAATGGCAACTTTTTT
GmaAffx.27610.1.S1_s_at	BI426859		0	No Homology to Known Proteins			AGTTCCATAATCAAGCTTCCTCCCATTTTGAATCTGTCTGTAATGCCATTCAGTCATACATGAAATTGTATGGACTTGCCTATTTTAAAA
GmaAffx.30028.1.A1_at	BU544443		0	No Homology to Known Proteins			GAAAGTTGATGGTAGTGGCAAGAAAAAGAAAGGTGGGAGTGGATTTCAGGTGGGGAAGAGAAAAGTGAANNNNAAGTTGACTGCCCTTGNNAAANCTAAGGCTGCNCAGGCAATGGAGCTTGACAAATGAGGTTCGACTTGTGTAATTTTAGNCAATGTGTTGAAAATTGGTAGATGACAGTGTTGTTTTGAGGCTCAATATCCTTGTTCTGTTNNGCTATATGACTATGAGGTTGTAAGTTGTATATTAGGTGACTATT
GmaAffx.1301.45.S1_at	BG157835		0	No Homology to Known Proteins			AGAGGAAGGCATATGTTTGTGTTTGTTGGTTAAGTGGACTCGTTATGTATTATGCCTAATTCTTGATCATTTATAGTTTCGCTTTGTTTACTTTGTTGTTTTTTTTTTTTTNAACATTTTGGTAGCTTTTCTGATGCTTTTTTGNTCTTTAGTTTCCCCCCAACAACTATGCTTCTGAAAACGTGTAGCATCTTTTTGGCGTTTAATAGATCTCCTACAATT
GmaAffx.1301.58.S1_s_at	BI945616		0	No Homology to Known Proteins			GTATTGTATTGATGCGCCCCGCTTTAATTATCAGTTATAAGAATTAAGATAGCATGTCTTTGC
GmaAffx.1301.110.A1_s_at	CD399897		0	No Homology to Known Proteins			GATAGTGTTGCATTGTGTTTAGACCAGTGGACTTTGTTTCTTGTTCAATTGAATCTCTTGACAATGTTGGTGTGGCTTGATGGCCNAACTAAGCTGATTCATAGGTTTGTTGTTCTGTGTTATTGTGTGGGTTTCGATTAATGAAATTTACTGTGCGAATGAGCTAAAGTGGCTCATAAATGTTCTCTNATCTTTATTATTGTGTTCATTTCATGATGCTGACTTTATTGAAATGACNNNGGGGATCATATATAGCATTGGTCTTGTTCCATGTGATGGAATTATTAAGTAAANNANNANNNNNNNNGTTAGTTTTCTTTGTTTCTAGAAATGTACGAGAGTATTTGGTTTT
GmaAffx.1301.74.S1_s_at	AW704103		0	No Homology to Known Proteins			TGAGTCAGGATCCACCAACACCACTTCACNANCAAAGCCTAGTGGAGCTGTAACTGTTTCCAGTGGCATTGGCCTTTTGGTGGGGTCTTTCTTTGTGTCAGCAATTATGTTTGGTTTCATGGGCTAGGGAAGAGGCAGTGCTGTTTTTTTTTTATTCTCCTTTTTATTAATATGTTATTNTTTTGCTNAGAGTTTNTNTGAATTTCATCATTTAATCCAGATGTATATCTAATCTTGA
GmaAffx.1301.61.A1_at	BG650277		0	No Homology to Known Proteins			AAAAACTCGAGACCAAAAGATGAAGAGACTTCCAAGTGACATGGGCAATGAATGTAGCTAACTTTATATGCTTCATTTGCTTTTTGAATGATTGCNGGAAAGAGCAGTCCCTTGTACTTGGCTTAGAAATTGTTAGTTCTATGCCTGCATACCTAGAGACATGGTAACTTGGTTGGAAACAGGCTGTTTTTACGCTTTAGAGTGATGACAAACTATGTATCTGGAATTTTCTTAGATACGGCCATTTTTATTCACTTCAGAAATTTCTTTTTT
GmaAffx.11956.1.A1_at	BE657986		0	No Homology to Known Proteins			TTGCTTTAACTGGTACTACTTCTGCTCCCTAGTTATCCTACTTGTTTGCTTTGTTCCTTGTTTTTAGTAGCTTCGGTTAGCTGTGTCTCACCATGCTTTGTTACTCTCCNTTTTCATNTNNTTNTNNTTNTTNTNNTTNTTATTATGAACCTAGAACAATTGGATGCATTTGTGNTTTTTTANATGTGGNTGGCTAATGCTGTTAATATTTTATATCTTTTGCCATGTGATTGTTATTATGATCATTNTGAATTCAATGCAATCTGCTTGGGTTTAAATTGTGGAA
GmaAffx.12007.1.A1_at	BU551279		0	No Homology to Known Proteins			CTGGCTTCTGGCGTGGATGATTTTGGTCCCGAAGATTTCGGTGATGAAGATTTCAATCCTATGGAGGCTGCCTTGTTATCAATGATGATGCATTCTAATATGGAAGATGAAGATGACGACGATGATGAAGAAGAAGAATACAGTGATGAAGACTACTAGATTTACTTAGTTCATATAAAACCCATCTATAGACCAGTTGTTGAGGTAGTTATCTTTGGCAGTATGGTATCCTATCACTTTGCTTTAAAAAGTATTGGGGGCAGGAACTTCAAGATTTATTCTCGTTTATTTTGCTTATACTCATGCCTATACCTGGTATTTGTGATCATATGCCAT
GmaAffx.11172.1.A1_at	CD404556		0	No Homology to Known Proteins			GAAACTCTGGTTTCGCCAATGAAGCATTAAGGTTGTTGAATGTTGATGTGCCACGCGAAGCAAGTGTAAGGAAGAATAAGATGTGTAAAATATTTTTAAGTCGTGTGATTTTATCGCTGGTTCATGTATGTTGGGATTAAATGTGTAATATGTATATGCAGAAGGGAGGGGCCAAGCATTGTATAGATGTTAATATTTGATGAAGCTCAGTTATGTGTTGTTACTTGTGTCGGGTTATGTATCCATCACTGATGTAAAAAAACACTGCTTCATCTATTTGTTAGTATATGGAAATNGGTATATGCTTTCTTGTATTATTGTGAGAAGCATATATTTAATGACTCTATCTTAAATTCCCTGGCATTTCTTAAAGTAG
GmaAffx.10278.1.S1_at	BG237749		0	No Homology to Known Proteins			GACAAAATCGGTTTTATGAATCGGATTGATTGTTTAATTTTCCTTTTTTTGAATTTTTGTTGTTAGACTTTTCAGATTTGAGGTAGAAGAAGTTTAGCTTTTTTTATTTTTAATTTCCGTAGAATTTCTGTTCGAGTGGGTGGGACGGGTAAGGAGGAAGACATCCTGTTGGTTTCTGTGATATGAAACCAATTTGGGTTGAATAAGCATGTTTTGTTTGGGGAATGTGTGTGCATTTTGCTTTTGCTTTATTAAATACTAAATTATGTGTTTCTGTCCACCTTTTCAATATATCAAA
GmaAffx.13587.1.S1_at	BG654181		0	No Homology to Known Proteins			TTTCTAGCCCCTTCTACGAGTTTATTTTTTGTTGTTCCTTTTACCAATCTCTTTGCTATCTATCATCTTGTGTATATAAATTTTGCTGACCAGTAAAATAGTATGATAGGAACTCTGAAAGTACCATTAGGGATCTTTTATGTGCATGTTATGCCTCCTTGTTTGGACTTCTCGTTTGTGTTAGTCCCACTTAGTCTGCATGT
GmaAffx.14030.1.S1_at	BE021503		0	No Homology to Known Proteins			TGGCTCTGGCTCTTCGTCATATTCAAGTTCTGGCTCCTCTTCTTCTTCATCAGGGNCAGGCTCTGGAGCAGGTTCTGAAGCTGGTTCCTATGCAGGATCTCATGCTGGCTCAGGCTCCTCTAGAGCGGGTTCTGAAGCAGGTTCATACGCAGGGTCTCATGCAGGATCAGGATCATACGGTGGTAATGGAAAGTAATTAATTAAATGCATGCCAGTTAAACCATATCAATTATATGCATGCTGTCCTGTGGAGAAAAGAACAAGTCGGTGTCTTTGTTAGTTCACTAGAATTATACTTTAGTAAGTAAGCAAAAATAAGTTGATGCATGTGTTGTGTCCATCCTGTTCTTTTTCTTTTGTACAAGTAGGAATCGTGCTTCTCCCTGTGTCCAATATGCA…
GmaAffx.14100.1.S1_at	BI423789		0	No Homology to Known Proteins			ATATAGGTGCATCATTTCAACAGGAAACATCGATGCTTCCCTGGAGTTGTCTCCTCTCAATTAAAGGCATACTAGGTAGGTGCGAGAATGATTGATCAACATTCAAGTTCCTCAAGTTTTGGTCGTCCCCAATATGTATGTATTGTATTTTCTACTTGTTATTCTTTGTGATTTGCTTTTAATTTATAGTTTCCACCTCATGTTATATAATAGCATTTTGAAGTAGTTTACCCGTGAATATTGCAAAGTTGGAATTAGTTCTCTTTTTATTGTT
GmaAffx.14141.1.A1_at	BI973009		0	No Homology to Known Proteins			TGTTGCCAGTGCCACTTCCCTAAGTGGCAATATGGCATCATTGGACAATATATGCCTTGTAAAAGTTACAATACCAGAGCCACTGTTCATTGAGGCCGGTGTTGGGAACTGCTTCACTATCTTGTATGTTGTATAGTACAAAATATAGGAGGAAAATCCCCCCCACCCCCAAAATAATCATAAAGGAAAAAGTATAGGTTAAAAATTGAAATAAATATAGAATATAGAGGGGGGGTAATTTACGCTGGTGTAACTCATATCATATGTGTTGGTATCAGATGCGCAATGTACAAAGTGGCTT
GmaAffx.14960.1.S1_s_at	BQ630244		0	No Homology to Known Proteins			GACATTCCTTCCATGGCTGGTGGAGTTTTCTGAACCGCTTTTTCTTTGGTCTCCCTGTGTGTAAATAAAGCTACAAGTTGTTTTTCTCTGTTTTTGATTTTTGTTGCATTTGTTGTTCTCTTGTTGGACACATCCCCCCATGTGTCTGAAAA
GmaAffx.14977.2.A1_s_at	BQ298894		0	No Homology to Known Proteins			AAAGGTCACCGAATGTTATGAAATCAAATGCTCCTGACAGTTTTTTGATCCCGGCATCATTGAAAGTTGATCATGATGACTGCAAGTATGTTGGGGATCCTTCCATCTTCAGTTCTTCAGTTGTGCCTTCTTTAACTAACATGGTTATGTGTAGGTGACTCCATGATTCATATCTTAGTTTCCGGGTTCTTTACTTCTCTCACTCCTTTGCTTTTAAGTACATGTATTTAGCCCCTAAA
GmaAffx.147.1.S1_at	AW100906		0	No Homology to Known Proteins			AACCAGGTGTAGAAGTAGATTACTCCATGATAAGATTGTTGGTGGTGTCTAACTGTAATGGCATAGCTCTAGTCTCGTGAATGTGAATGTGGAGGAGTGGACTACTAACATTGTTTTTTATTCGTATGATATA
GmaAffx.14750.1.S1_s_at	BQ081552		0	No Homology to Known Proteins			GAAACTTGAAAGTCTTCTCGTGGTCTTTCTTGTAGCCTC
GmaAffx.16696.1.S1_s_at	AW706525		0	No Homology to Known Proteins			AAGTATCACCATGCCTGTGTATCTCTATCATATCTTCCATTTCTAGTGTGCCTTTGAATAAATTCTGTGCGAGCTTGAAGAGTGTTTAATTATGCCTATGGTGTTACTTCATATATATATTTGCGTATATATAATGTATGCTATGTTGGCTATATTGA
GmaAffx.16168.1.A1_at	CD408636		0	No Homology to Known Proteins			AACAGCAGATGAAGGATAGAGCCAAGGAGCTCAAGGTCTTGCTCAAGAAAGGGGTGAAGATTGTGGGAGATTCATGCAAGAAGGGGTGGAACAAAGTCAAACACATCAAACGCTAGCTGATTAGTGNNNTTGTAATCATNTGTTGCATGGCTTATTATCCCAAAGTCTCTTGATTGNNNNNTTTTNTTTTTTGGTATTGNNNNNTATTTGTACTTTCATAGGTTTGGTTTGCATGTAAAATGTAGTCCTTC
GmaAffx.16384.1.S1_s_at	AW307590		0	No Homology to Known Proteins			CAATCACGAAAGGATCAAGTTGAATGAAAATTCAACCTTGTTGCCGATCAAACTCCCTAGGTAATTTATTCAATCTGTGTGACTAGGTAGGTGCAATTACGGCTTGATGAGTGTCCTTCTGCTGTAAAGTGCCAAGTAACGATATTAATCTCCAA
GmaAffx.46992.1.S1_at	BU083062		0	No Homology to Known Proteins			TAGTGTATTCAAACTTTTTTCTAGATACAAAAAACAACCTTTTTGTTTTTTCACATTTACCAATAATTCAGTTTGCCTCTCATAGTTTGTTTTATTTATATTTTTCCGTCGGCTTTCGCAATTGTAATACTAGTATCCTATATAAAATTGTAGCCTTATTCTATGCCTTTATAAAA
GmaAffx.48348.1.S1_s_at	BI945215		0	No Homology to Known Proteins			TTTTTCCCTATCTTGTGATCTATTTATGAGNGAGAAAAACAAAAGTGAGAAATTGTGCGTGTATCTGGTTGCTAATTCGAGTGCTATTAGTCTGTGGTTTGGTTGGTTTGTAACCCCGCTACTTGGGTTATGTTTGATT
GmaAffx.4882.1.A1_at	BE820482		0	No Homology to Known Proteins			TGGAGCTACCAAGGCCAGTTATTGGTTCTCTCTCTGACTATAGNCTATTTATTGTCCTANGAAGTTATTTCTGGTTTCATCCCTTGTGNACTTTTTCAGATACTAATGTTNCANCGNNTNTTTTTNCATAACCCTTNGTCGTGGAACTANATNGTNAAAATTGCAGTATTTAGTGTANANNANANNCCAGTNNNGGTATTTCTTAGCGTGCAGGATACCATGGGAAGCATTTATCAGATA
GmaAffx.48948.1.A1_at	AW310566		0	No Homology to Known Proteins			GAGGAACCAGAACCAGAAGTTGTGAAAAAGGAAAAGANNAANAAANGGAAGGAAACTGAGAGTGCTGAGTTGCAGAATGGGAATGNCGATAATGCAGGAGAAAAGAAGAAAAAGAGAAAGAAGCATGCCGAGAAGGAAGAATCTCCTGAAATGCCAAGCAAGAAGAAAGGCAAAAAAAAGAAAAGTGGGGACTAAGGTGAAGTCATCTGCTAATCAATCTGGTGAATGACAACCATTTTTGTATACTCCGGGCAGCTCAGTAGTTTGTTTGGTATAATTTTTGTTTTCATTTTTATGCAATTTGTAGCTTTATACATCCTTTATTATTATTTAATGGGCTTGAGTGGATAAT
GmaAffx.4922.1.A1_at	BI970569		0	No Homology to Known Proteins			ATAGTGGCTATGTTTGATTTTTGGCTCTGGCCTGCTGTGTCCCGAGACACCATTTGATTCATATATTGCCCTCACCACAGAAACTCAGTGGACTTAGTCGTGCTGTTGTAACATTCTTGCCTGTGTCTGGGTTGGATGTTGTGGCAGTCATTGTTCAATTTATATGTGATTCTTTCGAGCGTGTTATAGTACAGAAGATTGTAGTTTTGTGTTAGATGATAGAAATATATTCCTTTTTCTGT
GmaAffx.4451.1.S1_at	AW100961		0	No Homology to Known Proteins			CACCAGGTTCTCATGGGCACGGCGGNATGGGAGCAATGCTCNCNGGGGGTGCTGCNGCGGCTGCTGCTGCTTATGGTGCTCACCATGTCTCTCATGGCTCCCATGGCTCCTATGGCCAATATGCNNNACATGGTGCTCACATGCCACATGGAAAATTCAAGCAGCACGGNNNGCACGGNAAGTTCAAGCATGGAAAGCATGGCAAGTTCGGCAAGCATGGAAAGCATGGCAAGTTCGGCAAGCATGGTGGANNNTTCAAGAAGTGGAAGTGATGAATATGTATCTATGACTCCAAAATGCTGCTCTGTGTAGAGCTTATTATTGCTTTATAATAAACCATACTTTGAATGATGNNAGGGATCGATCTATGAGATCATGATACTTGACCCCTTGTTTTC
GmaAffx.43695.1.A1_at	AW278143		0	No Homology to Known Proteins			TATATAGAGACTTCATGCGTGGCTGGTTCGAGATCTAATGGAATTCTGTTGGTGTTATCTGTCTAGTTTGAAGGATTAATTAGGAATTGGGGAAAGAATTGCAAAGATTTTAGAAAGCTGGAGTAGTTGTGAAGANCTGTGGAGACGAGGAAGAGAAGCATGTNTTTAATTTACTTAGCTCAGTGTATATGTATATNNAGTAAGAACTTTGATTTCTGTGTTTTTCTTTTGCNTNATGTGTTTGGAATAAAGAAAGTGATCGATGATGGGCGAATTTTTAATGGATTNATTTCTGAATANNNNNAANNNNNATACATTTTAATTTAATTTATGAACTCTACTGTTTTTTTTTTTTAAAATATAATCCTTGATATTTTGTTGGT
GmaAffx.42925.1.S1_s_at	CA802660		0	No Homology to Known Proteins			TTGATTTGGCTTGTAGTGCCTCTTTGTGTTAGCCTTTGTATGGGATGTAAAACAGTGTCCTCTTGAAGGAA
GmaAffx.42933.1.S1_at	CA803075		0	No Homology to Known Proteins			TCATCTTCTTTTCCCGAGACCATAGTAGAACGTACAATCTTTATTTTCCCCTGAAAATTGAATGGCATGTGATTCTTTCTATTTAACTCCTGTTTGAATGCATCCTTGTAGCAAACCTTTCCTTGATGTTACATCCAAAATTGTGAGCAAAACCTTCTTTTAGCCCTTGAAGAATATACTTATTATTATCAATGGAAGTTGTTCGTCATTTGCATGGAGAAA
GmaAffx.4245.6.S1_s_at	BE059910		0	No Homology to Known Proteins			GATAGCTTGGCCTCCTTGTTCTCTAGCTCTAATATTGGAAAAGTTGTTGTTCAAGTTAATAAGGCCTAGTAATGTGCTTGATCTTGATCTCAATAATATTTCAGCACCAGATATTGAACTCTCTTCCATATTTCTGTCCTTTATTGTAAACTCGTCTAAGAAGGAA
GmaAffx.4211.1.S1_at	BG362818		0	No Homology to Known Proteins			TCGAGTTCAATTTGCAATTCAATTGATANGTTTCTGTTATCTGCTATTGAGGATGACTAACGGNTTTNTAATACAGGAAGTTTAGACGTGGTTCAGCGAACACATTAAAAAAATCGTGTTTTTATTTTATATTTATACTGTATCTACAGTTTTTATGTATTTCAGAAATTCAGTATACGTAGNTTTTTATTANGTTATTTTAGTTATTCTTTATGTATACATANTTTTATGTATTTATATCTACTGATGTTTATATTGTTCCGAGACGCATGGATAATTGGAAAATCATGNCNGTTGTCGNTTTNGATGTTAATTGAGCCAAACCAAAATATATTATCAGCCCAGTAAAGTAGTTTTAATCTTTTTTGGTCCCCTCTTAATTGTTACTTTTTCTAGTAA…
GmaAffx.37923.1.A1_s_at	BU547349		0	No Homology to Known Proteins			CTTATTTCCTTCATCGTACATAAATAAGCTATATTTTGCTGTTGGCTTGTTTGGTGGGAAAAAAAAAAAAAGACATGGGATTGTATGGTGAAAGCTATTTGGTAACTCTTTAGAGTACATGCAGTCAAGATTGGCATTTTTATTTGTGATGTGGGACAAGTTTTTTGGTAGATGAGGTCGTGTCTAGCCTTTCCAGTCATTAATTCTAGTGAGGGATCTCTGAAGTGGTGTTCTTTT
GmaAffx.38078.1.S1_at	CD405216		0	No Homology to Known Proteins			GACGAGGAGGAGACTTCACAGCCACCTACTAAGAAGAGAAAGTGAGAATATTCGTAGGAGATTGTTTCCAGGCATTTGAGTCGAGCTTAGTTATTANGGACAGATAAAATAGCAACCTCTTTCAGTAGACCTATCTTGCTTTATTTATATGTCAACGATGAT
GmaAffx.38315.1.S1_at	CA802980		0	No Homology to Known Proteins			TTATTGGGCCATTTTGTCTCATTAGATATGAATTTTTGCTTTGCTGTCTTGGTGAAATATAGACACTCCTTGGGCTTCATATTGCTTGAATAAA
GmaAffx.37663.1.S1_at	AW734686		0	No Homology to Known Proteins			TGATATATGCACAGGTTAGCCTCCANNNNNAATGTGTCACTTCTCTCTCTTATTGTTATCGCCTTGCACTTGCAACATTTTCTTTTTGGTATCACAACTGGATTTGGTTTGTAAAATTCCTTTGAATTCTTCATATTTCTAACAGTATACATTCGTGATTC
GmaAffx.38841.1.S1_at	AI965908		0	No Homology to Known Proteins			AAAAGAGGAATTGCGCTGATTACATATGCCAGGTCATGTGGTGTCGATTTTGGGAATTTTGCTTCTGCTAGCTTACAAGTGTGCAGTTACTGTGTATTAA
GmaAffx.39212.5.S1_at	AW423418		0	No Homology to Known Proteins			GTTTCTTATGTTGGTAATTTGTACATTGCTTCTTTATTGCTGTGGAAAATTTCGGATCTGTCATTTGACTGAAAATGAGCTGACGTGGTTTACATTAATCTTTAA
GmaAffx.34612.1.S1_at	AW311496		0	No Homology to Known Proteins			GCGGGCCGGTCGTCAGTTCAGACTAGCTGGTCAGTGGGGGTAAGAGAGTGTTCCGTTAGTGTTCTCACAGTCTCAGTGCGACCTTGCTTGGTCAACAATT
GmaAffx.34785.26.A1_x_at	BE661741		0	No Homology to Known Proteins			TCCTCCTTCCGTAAATTGCTCGTCTTTCCNAAACGTGAATAGTTTAAAGAAGGGAGTTCTCTTTATTTGTATTTCTAAATCCAACTGTTTAGTTAAGGGATGGTTATCTCTTGTAGAGCTTTTAGTTTGAT
GmaAffx.36836.1.S1_at	BI969127		0	No Homology to Known Proteins			GTAGTTGGCAGTTAATGTTTAGTTATGGACATGGTGGAGAACAAAAGCCTAGGTAGCCTCCTCTAAAAGCATCGTAATTATGTTAAGAGATAATGCTTCATTGTTGTGTTGCCTGTTATTGTTATATGTTTGTTTCACAGAATTAGGTCATTTTTTTTCCTGTTATGTTACCCTCTTGTTACTCCCCTACCAAAGTCACTTGGTTTGGTGGAAAGATGTTTGTACACCGTTTTATTTTAGCATATATCAACAGGCAGAAGTTTAGACTAATTTATTTCATGATTATTGTTTATGCATGTAAGCTATTAGAGCATCTTCAATAGATGTTATTAGAAACCTGATCTTTCATGCAAGATCTGATCTTGTTAAGATTTGTTGTTGGAGC
GmaAffx.34785.7.S1_s_at	BI497973		0	No Homology to Known Proteins			ACCACCAGTTCACCCTCCCTACATTCCACACCCAGTTTACCACTCTCCTCCACCACCACCTTACAAGAAGCCTTACATCTATGCATCACCTCCCCCTCCTTACCACTATTAGCATACCTCTTATCGATATGAA
GmaAffx.35464.1.A1_at	BE657554		0	No Homology to Known Proteins			GGCGTTTTCCAATGGTCTAATATTTAGTGCATCTCTTCTGCCCTAAGCTATCTTTGGTGGAAGATTTGGTTCTATTGTGGTGGTAAAAGGAAACCCATATAATGAAGAGAATGATCCTTGCATGTTAAGTGGAGACAGGGTTAGACCTTGCAAGTTACTCAAGTTTAAAGAATATCTCTCCATGCCTTCACCGTTCCTCTTGATGTGGTTCTCTTATCTCTTGGTGCTATAGCTTGTTATGTTTAGAACAATTGGTGGTTTGCTCTTATTAATTTTTGTAATTGTAGAGACCTCCAGAACAAAAAT
GmaAffx.50095.2.A1_s_at	CD417493		0	No Homology to Known Proteins			TACGCACGTTTCTGTTAGGGTTCAGGATTATTACAGTATTAGTATTCTTTTTTTTACCGGTGTAGTGAAATACATTACTGGAGAAGAATAGTGAGAGGAGCATATATATCTATATGTTACTACAGCTTTATTAAAAGAAAAACTCTAGATTGCTTTTGCTTTTCCAATTTATGTTGTCGGTTATGGATACCAAAAAAAAAGGAGGAATGGGATTGTTTGTGGTTGTGGGTTGCGAGATTACATGTGATGATTCCGCTGCAATCTACCGACACTA
GmaAffx.50677.1.S1_s_at	BI971744		0	No Homology to Known Proteins			CTGTAGTGTAGCATGCGAGTGTATTGGTGGTAATTCAAAAGTTTGTATTAATCTCTT
GmaAffx.50897.1.S1_at	BM177461		0	No Homology to Known Proteins			GATGATCTATAGGAAGTGGAGTCTCCTTACCGGNCCGGTCNCCATTCTCGGCGGCGTAGTCGTCGCCATCGCCGCCGCAAACGTCATCTTCGTCAAGAATGATCCTTTCCTCAAACCAGAGGAGAGGAAGTATGAAAATGAACCTGCTACCAAGTAGGAGAAAAGAGACAACAGAAGTTTGCGTTTTGATGTCTTTTAAACCCTGATTTATGAGCTCTGTATACTGTTTTGCAAGACANGCTCTNGGTAGTTAATAAGATTGAGATTCTGAATGGAGTCTGGACTCTGGAGCACGGGCCCTTAGTTTAGAACTAACCTTCCAATGTTCTAGAAAACTGGTTCATATTTCAGAGATCCTTATTTTTCTCTTCTGTACAATGTCAACTGCAAAT
GmaAffx.51464.1.S1_at	BQ628397		0	No Homology to Known Proteins			TCTCCCAAATACATGCTAGTGTTGTTGATAGCATTGGTTTTGGCAGTCTCGTCCCTTTCCCATGGTCCAGTACACGGTTCAGTACACCCAAGGCCTCATCCTCCTCCAAAAATTACTCGATACTCCGCGCCACATATACATAAACCAAAACCACCAAACGTGGCAACAACAAACACCTATGCAGCAAANAANCCTCCAACTAAAGGTTGAACTGTTAGGCTATGATCAAAGGTTTTGCAACGTCAAGGGAGTATATTACAACAGTAATCGCAATTTGAAACCTTGACTANAGATACTTTAATGGCATATAGTATTAATTAATGGTCAGTGCTATGAGTATGCATGTATGATTAAATAATAGTTAGTTAGGAGTTTGTTTGAACTGTTGTAATACCTTGT…
GmaAffx.51535.1.S1_at	BI701497		0	No Homology to Known Proteins			GTCCTTATACCATATGGAGGTGATTAAATGGAGCTCCACTGTGAATTTCAGCTAGTGATTGTGGGTCTTTTGGGTGGCCATGGTGATATGGGGTATGGTAGCAGTAACTACTACCTACCAATACCCTTTTTTTTNGTTCATTGTATCTCGTGAGCTTGGTTCTTATCCCAAATGGATAGCATAATTTATAGCATTGAGTTTTAAATGTTACCAATAGAAAAAATATTTATTTTAGATTAACTCTTTAATATCATTGATTCTGCTGTATATCCGTTAATGCACCGTTATTTGTGAAAAGCTCCT
GmaAffx.51829.1.S1_at	BU763894		0	No Homology to Known Proteins			ATATGTACATGTAGTGTGCGCGCTATACTTTACGTATGTTCTTAGTGAGTGGGTTGGGTTCATGTTTTCATACTAATGCACGCTGAGACAGTGTGTGATATCGGAATCTCAGTTGAT
GmaAffx.51412.2.S1_at	BI424433		0	No Homology to Known Proteins			CTTGGCTTGGAGTGGTGGTTCTAAATNATATCAAAGAANATAGCNNTGAGTATAGATTTNNGTTATTCAATCTTGAATNNGAAGNGGTGTCACTCAAGGCTACTATCATTTCTTGTCACTATAGTGTAGATTTATTTCAANAGCNTTGCACAGATNNTGGTTTTNTGTGGTTGAAGATTTCTGCACCTGTCAATGATTANGGGATAAAGAGCNTATTCTAATTCAGGATTCTCNTTTAGGTTTCCTGACAAGTTNTTTCCAAGGAATATACTGTTTCTTCTTAGGAGGACCACAATTCTCAGAGGATGATGCCTCCACTATTTGATTGGTCTCCAGAATATTCTGTTGCCTTATGAACATTNTCCATTGTTTATTTCTTTTGCAGGTCGGATTGGTAAA…
GmaAffx.53445.1.S1_at	BE058743		0	No Homology to Known Proteins			AGTATGCTGATTTCCATGACATTTAAAAGCATTTTATTGACAAGCGGATTATGAGTTGTCATCTGCCCCACCACAAAAGATCTTTTTGTAGAAAGGAACTAATTGTTGTGCCAGCAGAGAACCTTATTTTGTTATGTTATAAGAATATTGTTCTGTTCCCTGTCCCTCCCCTTCTATTATATGCTTTACTGGGATGGGGAATGTTGCAGAGTAATGAATGTTGTTTAGCTTTATATGTTCCTCCATTATGTTTATTCAAGGTTTTATATTTTGTCTCTGCATGCTGCGTGCTTAATTCAACTAATATTCAATCAGGTATGTTGCTGAGGTTTTTCA
GmaAffx.53957.1.S1_at	BF008940		0	No Homology to Known Proteins			GTGGTCTCAGACGTTTACATGTGTCTCAGTGGCATGTAAAACTAGCTTTTCACATATTGCTTTCATATGAAGATTGCTCGTCATGATTTGCTCCTTATCGTTAAGTCGTTGTT
GmaAffx.5401.1.S1_s_at	BM732974		0	No Homology to Known Proteins			GCTGTGGATCCATAAGGTAGACAACGAGTTCNAAAAGAGAGAAAAAAANGGAAATTAAAAAAGAAAAGAATTTGCTTTTTTATCTGTTGCCTTTTTTTTTTTTNNGCCGTAAATGTAGAATTTGCTTCGTGTAATTTGACATTTTGACGTGCTTTCTTCATCTTCATTTTTACTGCCCATATGTTGGGTGAGCTGTAGCCA
GmaAffx.54085.2.S1_at	BQ629483		0	No Homology to Known Proteins			AAGGAGGCAGGAATTGCATGTGCTTGGTAACCAAAACCAAACAAAGCCTTAAGANGTTCANTTTTGGGATGATGNGTTNTTCTCNNAGACANCANCAAAATCCAAAACTGTTNNTTTTTTTNCGTGATCTCTTNACTTTTCTGAACGCCACACAGATCCAANNNNNNTGGCAGAGCTGCTACTAATCACATGCATCTCACTACTTTTCCTCATTCAATA
GmaAffx.5448.1.S1_at	BU549130		0	No Homology to Known Proteins			GTACGAGGATCTTGAAGGCCCTTCTTCAGTTGCACCTCTCTCAGATTTGGAATGCCTGCAGTGGGATGATGACTACTGAAGAACAAGATAAGAGAATTGAATTNNANATNTATATATATATANNNAAAAGCAAGTTTGCAGATCCATGGTTTTTTNCATTGTGGGATCATAAGCATCGTGCATAGTAAATTAGTAATCACGTACCCTTTTTTTTNGTTGGATTTTTAAAACAGTCTTCTACATACTGATTTTAATTATCATTATAAACATGATCATACACATCATTAGGACATCATCATAGGGAAAGTTCTTGGGTACACATACACTGTATAGATTTATGATATCCAGGCCTTTTCGGTGTTAGTT
GmaAffx.54898.1.S1_s_at	BQ452830		0	No Homology to Known Proteins			GAGTCTGAGTGTATCACCTCTAAGCTACGATCTTCATGACTCATATGAGGTTGCTTCTATTTATTTGGTGGCCATTTTTCAAGTGTTGTTCTTACTAAGTTCAAGGAAGCGACAAATCAAAAAGATTCAAGACAAGGAAGCAAGATTAGAAATGTTGATATCAATTCAGGCTGCT
GmaAffx.55090.1.A1_at	BI967937		0	No Homology to Known Proteins			TACGACGTCGGATCGGGATGGAACAACTTTGGTGCAGCCGGTGGCCGGTGAATCATGATTAGGGGTTATTATTTTTTTTAATTCGCAATTTTAAATAAAATTGAAAAAATATAGGCAGGTGGAGGTTTGAAAATTGAAATGTGTTATGGCCGAAATGTAACTTTGGCTGGCAATTGTCTAGTGGGGCACAAATGGATGTGGAACACATGTGTGACCNAAGGGTGCATTGCAAGTTAATGATGTA
GmaAffx.55403.1.S1_at	BM271453		0	No Homology to Known Proteins			ATATATACTTCCTCTTAAACTCCCAAAGTTTTTCAAGATGATTACTGTACCGACCTTTGTTTTTATCCTCAAGTCCTCTACATTTTTGTGGTTAGTATATTGAG
GmaAffx.55834.1.S1_s_at	BQ453267		0	No Homology to Known Proteins			CAGTGAATTTCTGATCGCACCTAATATATTGTCTTTCGATAGGTTTGACAGAATTTTTCATCGTTCTACAGTTTTGT
GmaAffx.56430.1.S1_at	AW734641		0	No Homology to Known Proteins			GTATATCATTAGTATTGCCTCGGCAAAGGTAGTGGAGAACTAGTTTCTTTTGATGTTAATGATGTTGTTGAGTTGTCTGATGTTTTTTTTTTTTGGATTTTGTAACTTATGCTTTGTGTTTGTTGTTGCTAGACTAAATTTTTAGTTCTAGACTCTAGCCTCTTGTTTTGCACATGTATTATGTATATGTATTACCTTTGGTGAATGAA
GmaAffx.56626.1.S1_s_at	CA935145		0	No Homology to Known Proteins			TGCACTATAGCATTTCTGGTTTTCATTTCTGTAACATTTTACTTCTGGATTTTGTCTAAATTTGCATTGAAATGTATGATCGGAGCTTGTGGATTTTGTCTGGATTTGTTATAATCGGAGCTTGCTTTCA
GmaAffx.60419.1.S1_s_at	BQ611901		0	No Homology to Known Proteins			CCCCTGATTACATTTTTGTTAAGCGCAGCGAGTTT
GmaAffx.60419.1.S1_x_at	BQ611901		0	No Homology to Known Proteins			AATTGCTTTTATTTATCTGTGTTTTAATGTGTTGTGTTTGTCGGAACCCCTGATTACATTTTTGTTAAGCGCAGCGAGTTTCAGGACTTTGCTGCGTTGTGTTGCTTTGGTTTATTAAATGTCAACTTTCTAT
GmaAffx.61061.1.S1_s_at	CA782177		0	No Homology to Known Proteins			ATTTTAGTCCCTAGTCAAAATGCTGATTTTTGTCGTGTGTCTTTTTCTTATGTCTTTGGTTTCTATCCTATTTCTGTTATAGCTGTTTTGGTTGGGATCTTCAACACTGAAACTTAATGCTTGATTTTGTTACACA
GmaAffx.59682.1.S1_s_at	BI945169		0	No Homology to Known Proteins			AACAACAGCCCTTGTACTGTGTGATGATATCAGTCTACTTTTATTCTCAGCTACTTTTAACTGTCTTTGGGATATGTTCATTGTTCAATACCGAATGATGAATATCGATCTTAATGTCTGTCTG
GmaAffx.59686.1.S1_at	BI945697		0	No Homology to Known Proteins			AAAGTTGCATTTCATAACTTGTAATTGAGCATTTGGAACATCTATAGGAAATACAAGGCTTCGATAGTCGGATTTTGTATGCTTCTTGATGAATTAATGCCCTTGTTGATTTTCCTGTAACTGGGAGAATTGTTTTGAAGTTCTTTAGATTCTGACCTTTATTGATTTGTGTTGAATTCTCTGTCAAATCCTTTATGCTAATGTGCACATCATTGAGTTTCCTTTT
GmaAffx.59763.1.S1_at	AW620896		0	No Homology to Known Proteins			GCTTCCTCTTTTTTATACTTTATTGATTGTATTTTGCCATATCATCCGACTTTTATATGTATTTT
GmaAffx.59763.1.S1_x_at	AW620896		0	No Homology to Known Proteins			CGCCATTTGTGGTGTTTGTTTGTATAATTAGGTTTATGTTTACTTAATAAAGCTTCTTAAGCTTCCTCTTTTTTATACTTTATTGATTGTATTTTGCCATATCATCCGACTTTTATATGTATTTTTTGGGCTGCTGAAACTGGTGCATGTAATGATTTGGCTAGCAATGCAGTGTATTTCATGGGTC
GmaAffx.60156.1.S1_s_at	BM523697		0	No Homology to Known Proteins			GATGATACATTGGACTGCTCCTTTGGAAAGTGTATAGGCCACTTTTGCTATGTTTTTTACATTCAAAGCAATTGGTTGTCTGCTTGAATTGTCATCATGTG
GmaAffx.52493.1.A1_at	AI856188		0	No Homology to Known Proteins			AAGATGTGCATCCTGGTGGGCAACCTTCACATTTTTTGTGTGTTTGTGTTCATTAAAATTCAGCAAACCACTTCTCCAACCACAAGGACCCAATTCACTATGGCTTGCCATATTAGGAATGTTCAGTTTTACTGTGTTTGTATCTGCTGCTTCTGTTATGGTTGTTGTTGAAGCACAGTTCACTCGTATGCAGATAACTGTTATGCTCAGTGCCTTCTTGGCTCTGCTGTTAGCTTAATTAGACAGTTTTCATATGTGTACTTATGTTTCCTTTAGCCATGGCGGAAAAAGTTGTTGTAATCTTTTTATTTACATAATTTCATTCGCATAACAATAAAACGATGTTTGGGTATGTGCTAT
GmaAffx.57748.1.S1_at	AW306274		0	No Homology to Known Proteins			TTACGCGCTGTTGAGGAACTTCCGCGANGCNNNNNNNNGCCGGCNAAGGGAGTTGGTGGAGTTGGAAAAACACGAGAGCAACATCTGGAAGAAGNATGATGAAGGGCACCGCCCCAANCTGCAACNGAAGGACNAATAAGGCAGAAGTTTCTTTCGAATTTCAGGACTTTACCACCGAGATTCAATTCAGAAAGCCACCTTTGGTTTTTCCTAATCCAGTTTCATCATGTGACACTAGCAAAGACAACAACAAAGGTAACAAGAAGAAGAAACAGCAGGATCTTGCTCTCGATCTCAAACTCGCTCTCTAGTGATGATCACCAATATCGACCTTCAATTGTATCAGAGTTTTCTCAAATGGCCGCTTATATATATTATTATTCCTGTGCTAATTAACGT…
GmaAffx.57755.1.S1_at	AW706534		0	No Homology to Known Proteins			TAATGGGATTCGTTCCATCTTTCGGGACTTGAGTGGATAATTTGATGCAATCATGTTTATGAATGGAAGATGGTGGTGCGCTACCTTTTTTGTAA
GmaAffx.5824.1.A1_s_at	BQ298207		0	No Homology to Known Proteins			AGATGGATTGTTGGTGGCTGCGGATGGTGTTTTGTTACTAAGTTTTCTTTTTGTTGAAGCCTATAGGTTATTAGGGAAAAATAGGTGTTTACTTGGTAGTCATATTAATTGTCATTGGCAAATACTGCCTAAGACACTGTGAAGGTCTGGTTGTTAGAAATTTGGCATGTATTTGATTTTTTTGGATCCTTTATTTCTCGTTTTATTTCTGGTTGTGCAGCCACTTT
GmaAffx.58988.1.S1_at	BG237453		0	No Homology to Known Proteins			TGCTTTTATGTGTTGCTGGTACCATTTAAGGTGATGTTTTGAGCCACAGGACATCGATTAGTGCAAATTATCTTGTTAGTCCTTCGCAAATTGGCATCGTAATTTTGTTTTGAACTGTTTTTGCTACTGATGAGTTATA
GmaAffx.59014.1.S1_s_at	AW733977		0	No Homology to Known Proteins			AGGAGAGCATCATGTTGGTGAGCACAAGCCGGAGCACCATGGAGGAGAAGAGCACAAAGAGGGGTNCCNNGACAAGATCAAGGACAAGATCCACGGCGAGGAGGGTGGCGCCACCGCCGAGGGCGAGAAGAAGAAGAAGAAGAAGGAGAAGAAGAAGCATGAACATGGCCATGACAGCAGCAGCAGCAGTGACAGTGATTAGATTATCTCCCACTGCTGCATCACCTATATATCTTATAAGGTGTATGGGACCATAGTAGTGAGGGCTGTGTCTTTCTCTTTTTTTCCTACTTGTCATTTATATTTATGAGCGAGAGAAATAGTGCGTGTATCTGGTTGCTAATTCGAGTGCTATTAGTCTGTGGTTTCGTTGGTTTGTAACCCCTCTGCTTTGGTTAT…
GmaAffx.59384.1.S1_at	AW184917		0	No Homology to Known Proteins			AACCATCACCGTCCGTGGGAATGATGATGCTTCATATGGAGGTGGAATTACAGTTAGTGGACAAAATTCACCTCTTGGTGGGCTTGGAAACTTGGATAATATTCCTTGCAGCGATTTCAATAGTGGAATCAATAGTAATAATGCTGTGAGCTCTATGACTAGCATGTGGCCTTAACGTTATTCTTATTGCACCACATGACTTGTGTTGTAGTAGTACTGTCCGGTTAGATCCAACTTTATGCATGTCTTGGTTTTATTAGATT
GmaAffx.59155.1.S1_at	BG511534		0	No Homology to Known Proteins			TTCTTCTATCCACAGCATATTCATTATATATAATAAAAGGTTTGAGTCTGTTTGAGTGTCTCNNNNNNNNNNNNNNNNNNNNNNNNNNNNNNNNNNNNNNNNNNNNNNNNNNNNNNNNNNNNNNNNNNNNNNNNNNNNNNNNNNGGGAAAATTAGTTGTCGCCAGTGATGGCATTTAAATGTATTGTGGGATTTCAGTGCTGTTAGTATT
GmaAffx.5716.1.S1_at	BQ611417		0	No Homology to Known Proteins			TTTTGGAGATTAAAGGTCACAGATTGAANNNNNNNNGTGATGGAGATGGTAGTGGNGGGNCTTTGCTGTAAATGAGGACACTTTTTTTTNTNTCTCTCAAGTGTTGCACTCTCTCTTGGTGATTGAANGCANGCNCATTAGGCAACTGNGGTCCCACTTTCNNCCCTCCTTTTTNNCATTCTTTCAAGGTTGCACGCATATCATGCTGGCATCTACTCTAAAAGTAACAAGAAAGTNTCCTGATGTTTGGCANAGTGANCNTAGTGTTTCATNATGAGTTNCTNNGNCCCCCTTNGTTTGGATATNTAGCATTTTGTGGTAAAGGTTACTTTGTTTTACATGTTGAGGGNNAGNGNGGAATGATGANAAGNAATNCTAGTTTCTGCTTTGTAATTCATA…
GmaAffx.67375.1.A1_at	BE659769		0	No Homology to Known Proteins			TTTGTTGGCTGGATTTTTATGTTAGTGTTTCGTGTTCGTGTTCATGTTCAAACATTTGATAATGATATGCGCTGTTTTTGGTGCTGCTTTTGTTTTTACTCATGAATGCGTGTTCTATTTTG
GmaAffx.65892.1.A1_at	CD406505		0	No Homology to Known Proteins			AGATGAGGAGTCTCCACAACCACCTTCTAAGAAGAGGAAATGAGAATTATACTAGTATGAAAAAATTGTCATCTTCCTGCCTTTTGTAATGCTTTCTAGTTTTTAGTCAAATTTAGTTCTTAGGACAAGGATTTACCAGCTTGGACCTGTCACCCCATGCTTTTATTGTCTAATATCATAACTTATAAACATTAGTATATTCTCATGTTACGATGTTGTTAGCTTTGGAAGGCATTGTAGTCTGTGGCAAAAATGGTTCAGGTCATGGTACTCATTTCCTTTTTCGTTGGGCTTGTAAGTCTGCCA
GmaAffx.65918.1.A1_at	CD412482		0	No Homology to Known Proteins			GATTGCGATATTATACCCTTGCGGACCTAGCTTCGATCTTTAGTTCTTACCGACTATATATAGCTA
GmaAffx.66239.1.S1_at	AW101381		0	No Homology to Known Proteins			ATGGTTGTACATGCTGTATCCGTGTTTTGATTCTGTAACATTTATGCATGATTTGTTCCCCGTCAAAAAA
GmaAffx.6418.1.S1_at	CA935147		0	No Homology to Known Proteins			TATGCTTCGCTGCTTCTGTTACAGACCCAAACGGAATGGCAATATATATTTTGACCATTGTCTGAACTACTATTTTGTTTTAGCTGTGTTAA
GmaAffx.64231.1.S1_s_at	BI786484		0	No Homology to Known Proteins			GAGTTTCGTTTCAGTTTTTGATCACCATGAGAGCTAAGTGGAAGAAGAAGCGTATGAGGAGGTTGAAGAGGAAGCGCCGAAAGATGAGGCAGAGATCGAAGTAGTGTGCTTGTTTCCCCAGCAACTATTGCTACTAGTTTTGTTTTATTTNAGCTATGTTTTTGTTTCCAAATGTTACGATACATTTTTATTGGTTTCTCTTGCTTTTGTCTTACCTCAAAAAAGATGCTCTTACCGCAAATTAATT
GmaAffx.61861.1.S1_at	BM270636		0	No Homology to Known Proteins			ATGATGACGAAAACAACCGTTTGTTTGTTTGTTTATTCTTAATCAGTTTCTTATCGAAGAGCACCTTCACTTGAGACTTTGGGTTGGACTTAGCTGGAGAGTATTCACATTCTGTGAACTAAATATTTGAAATGCCAGCTATGGTTTGTTATCTTCTCGGTTTGTATTTAGTAGTACTGCATTATTAAATGTGTAAGAATGCTATAAAGCAGATTTGAATGTTTGAAAGTTCCCCAATACAATTAAGTG
GmaAffx.6522.1.A1_at	CD394786		0	No Homology to Known Proteins			TGCCGTTTTGTTAACTTGCGTTTATACGATTGCGTCTTTGTTCGGTTTTGTGGTTGCAGGAAATAACCAAATTGGTT
GmaAffx.65393.1.S1_s_at	BU760770		0	No Homology to Known Proteins			GTTTACTAGTGTGATTGGATCTCCCGTTGAAAACTCAAAGCTATGCTTCTGTTGAATTCACTTTCGCCGAATAATAGGAGTATTTTGAATCTTTCTATGCA
GmaAffx.65026.1.S1_at	BQ612000		0	No Homology to Known Proteins			TAAATCTCTTGTTAGTTTTCTTTGTTTGGGGGTAGTTTTTTATGTTCAAATGTGAACTTAAATTAGAATATGTTTTTTGCAGTAGATACTGTTTTGTTACTTCTAGTTTCTTGTCCGGTGTATAGATGTGGTGTGTGGATTTGTGGAAGCTACTTCTTTATGTAAATTT
GmaAffx.65048.1.S1_s_at	BQ628412		0	No Homology to Known Proteins			ACTACAACGGGAACCAGAACCAGCAGGAGTTTGAAGATGAACATGAGAACTTCGAGCCATGAGCTTGGATCATTGGCAAAGTAAAGAGTTCACTATACTTTTGAGTATCCACTATGGGTGTTTAATGTTTTTATTGTGTTTTAGATTCAAGAAAACACAAAGTTAAAGGATATGTTAACTATGAAGGGCTTT
GmaAffx.70975.2.S1_at	BG790871		0	No Homology to Known Proteins			AAATTGTGACTCCTTGAACATCTGGTATATACCAAAGACTTCTGATTCAGTTTGGAGAATCAATTNTGTCCTTCCAGATTGGAGAAAGTAAATCCTACATAGCCACCAACAAAATATCATTAAAAGAATCAACCTATATGCTTTATCATTGGTGATTGTTTTTGTTACATTGCGGGCTACTACTACGAGAGTTTTTCCTTGATCTTGAGTCAATTTATTTCAGTTTTATGCTTTGTTTATATTTCTCAGAGTTGGGATGCCTGAGTAATCATTTAGTCGTACATCATAAACCGGGTTCATNACTTTGTTAGATAGCATAATTGCTGTTTTGATGAATGAACAAGATTGAGCGTTTTGAACTTGTTGAGTTGTTCCTTATATATGTATGCATTATAGTTT…
GmaAffx.71137.1.S1_at	AW394482		0	No Homology to Known Proteins			CTTTATGAGAGATCATCTTAGGAGATGATTTTTATGTGTTTGTAAACGATTGGTCTGCTTTTAGGTGAAAGATCACTCGAGGGCAAATATGGCTGTAAGGAGCCTATGTGCCAATGTAAATAAATATTTAAATTTAGGCTTGTGTGACAAGTGAGGATGGTTATTCAGCAGCATTTACACCTCAACCTCAAAGCCTGTGTTTC
GmaAffx.71175.1.S1_s_at	AW424057		0	No Homology to Known Proteins			ATGTCTTGTAATCCTGATAACTCCATTAGCTTCTTAGTACTCTAGTAAATCTTTCGGAAATTTGACAGTCAGTTACTCTTATGATTTTTGTTTTCAGTTTGAGACGGATTGATATTGATTATGCTACAGTT
GmaAffx.7160.1.S1_x_at	BE059130		0	No Homology to Known Proteins			TGCTTTTTGTTATGGGGCAAATCACTGTTAGCTTTGGCTGTAATAANNCATATAATGCTTTGTATTATGAAATCTTAGTT
GmaAffx.73185.1.S1_at	BI701903		0	No Homology to Known Proteins			GGATTGCCTCATTGGTCATAGTTTGGAGTCAGAGTTCTCGTTTGGCTCCCATGTGGCAAGAATGCTCTATGATGTGAGCCAATCTGTGTCTGGCCAAACAGGGAATAGCAACAATGCTGCTGTTAATTGTCCAGAAAGCAATGGTTATCGTAGCTGCTTGCCATCTCAAAACGGTGGTGGCCCTAACCAAAATTGCGGTGATTACACCAGGACTTGCTAAGAAATATATTACCAGCAGGTATTTCANTTCTGATTTCAAGGTTGTCATATTATTGAGATTGTCATAATCTGAAGATGCGTGTAATAATTGTTGCTGTCGGTTCATACTTGTGTTGTGGATGTATTATTGTGTATCACATGTAGTCTTGGTTATTAAATGTTGATAAGAATAGTATTCCA…
GmaAffx.73401.1.S1_x_at	BI971895		0	No Homology to Known Proteins			TAAGAAACGTATCAGTTTTTGGTCTTAATAAGTGTTGCTCTGCTTTGCAATAAA
GmaAffx.73486.1.S1_s_at	BM092012		0	No Homology to Known Proteins			CATAGTACTTGAATTGGCATCGGGTTTGGGTTAACAACCCGTTTTGTCTATGTAGTCTTCAATAATAATTGGCCCTATCTGTATGGCCTCGATGATCTGGATATGACAGTACTACTATATGCTTAAT
GmaAffx.70659.1.A1_at	AI495240		0	No Homology to Known Proteins			CAAGGCGGTGGTGATTAAGGAATTATGTTGGAAAATATGTAATATAGTTTACTCAAATGAAAGAAAATGGTCTTCAGTGTTATAATTTGTGTAATAAAAAAGTAGTACGTGGTCTGTACTGTGTTGTCTGTACCAAAATAATAAACACATGCATGTAAGGGGGTGGACACCATGCATCCTGTGTGTTTTGTTGAAGAATCAAGTGAATTTCAGTTTGAAACAGTTTACAAAATTTGATCCATGACTCTAATTAATTAAGTCTGCCTATTTCATGATTAAA
GmaAffx.69688.11.A1_s_at	CD413010		0	No Homology to Known Proteins			GTTTCTGTGTTCATAATCGTTTCCGGATAGATTATATCTTGTCACCTCTCCTTCATGAACTAGTTAACGATTTGTGGAGTCGATTACATTGTTTGGTTGGATATTGTTTCTGGTCAGGTTATCCTTGTGTTATGTACCATGTTTAACCTTTGTTTCATCATATAGCTCCAAAGTAACATGTAAACTTTGGTGAATTG
GmaAffx.69979.1.S1_s_at	BU761302		0	No Homology to Known Proteins			TATACGGTATGCATCTATATCAGCATACATTTGAATAAAGTGTTACGAATGACATGATTCCGAGTGGTGTGCTTTTAACTGTATAGTGAAAGATTTGTGTCATGAACAAATCTATATTTGTCCATAATGGTCTGTTTGTGCATCTAAAATCATGAAAGATTTGTATGTGTTGTGACTGATCTTATTGAAAG
GmaAffx.70057.1.S1_s_at	BU765822		0	No Homology to Known Proteins			TTGTGTTAAATTTCCGATTATGAAATTGTGAGGTCTTGAGTTGTCCTCAGCAACAGATGCATTATGCTATTCTCTTTTGCTCTGTTTTCTGTTATTACATCNNNNNTNNTNNTTTTNNTTTTGTTTNATCTCCATGCATCATAATTGAAGTTATACATTTATACTCTGCCAGATGGTTCTTATGTAATGAGTTGTTTCCGTGTTAAGAAAGAACTGCTCTTTTAGAGTTCT
GmaAffx.70371.1.S1_s_at	CA935090		0	No Homology to Known Proteins			TCACCTTTGCAGTCACCTTCGTCAACTGTATGATGATGCTCTTTGTTCTTGATAGTCCTGAGAGCAGTATCAAATGTAATGCACAGTTGTTTCTCTTGAATAAA
GmaAffx.70399.1.S1_at	CA936776		0	No Homology to Known Proteins			GAGGAACGACCAGCAGAATTAATTTTTCATTTTTTCATTTTCACACACCAAAAAATAAAACCAGGAACAAGACCTTTGGATTTCGAGGCCGAATTGCCGGTTCGGTATTTTCCCCCCCTTAGTTTATAGATCTTCTTCACGTTGCTAATGATTGCGGTGGGTAGTTAATTAGTAGATTTGGATTTGAGATTTCAGGACAGTCATGTGTTACACTGTTACTGGAGCGAGTCTCGAATCCTTTTGTTATTAATATTTTTTTATCTCATTCCCGTTCTCGGTGGTTTAATTAATTTTATGTTATGCTATTGTAGGAACTGGATTTATGGAGCTTACATGCTTATTAATTC
GmaAffx.68418.1.S1_s_at	BI425533		0	No Homology to Known Proteins			GGATGCAGCCTTAGCTGTGAAGTTGTTGCGGTATTTGTTGGAATCGAGACTCATGTTGTTGCTCCAGTTATGTCTTCGTTGGTTAGGACATGCGTTTGAGTTTATTGAGTTTAATTTATAAAATCAGGTTTAGCTTCGCTAGACCATTTTTAAAA
GmaAffx.68432.1.S1_at	BI426680		0	No Homology to Known Proteins			TGGAATTTGAATTTTCTCTTTTGAGGTGACTATTCTAAGCAATTATAAATGTTATGTTGATTTGCCAATGTGGCTTACCTCCAGCTGCTAACTAGTACTGAGTCCTGTATATATGGCCGTTTCATGTATACAATCACTCGTTGAATTGTAACTT
GmaAffx.68672.1.S1_s_at	BI945193		0	No Homology to Known Proteins			TATATAGTTTGTTTTCCTCTGGCCTTTGCTGATGATGCTGTGTCCATTTTTGTTTATCTTTTGTGCATATAGTATATAGTATATAGTATATATATGAATATGTTTACGAGTTCATCAGTTGAGCGGTTTAAGTCCTGAGACGATCGAGGTAGCTGTGTGTGTGGTTTAACAGCTCAGTCTTGTTTTACTGTTGAACTTGGTTATGGTTCTCAAGCTGTAAAT
GmaAffx.69055.1.S1_s_at	BI426205		0	No Homology to Known Proteins			TTCGCAGAATTACTAGATGACGTTTGGGAAGCAGTTTTCCATTTGGCTGCATAAGTTATTTTAGCTATTAAGGATTTCAGAGTTAGATATAATTTTTCTGTACTGTTATAGATCCTTGTTTCCTATTCTGGTTTTTAAGTTTTGATGGTGGTAGCAAGTATTTGGCGTTTTTGGTATTTCCTGGCGACATTTTTATACAGGACTGTAGTGAAAGTACTTGGATTTGAAGTATATGAAGAGTTATATGTGATTACCTTGTCTA
GmaAffx.69182.1.S1_s_at	BM525748		0	No Homology to Known Proteins			TTATTTGTTGTAGCTACGCTTGTCCATTCTTAGTTCCTCAATTGCTTCTCGGGT
GmaAffx.7738.1.S1_s_at	BE058056		0	No Homology to Known Proteins			GACAAAGTTGTCTCTGATCTGTACTCTTCCACTTAATGCTATTCCTGACTTTGGAACCAAAA
GmaAffx.77770.1.S1_x_at	AW119465		0	No Homology to Known Proteins			GTAGAGAGCTAGTTCAGGTTTTTCCTCGTTCATTTCAGGTGATTGCTTCATTTGTATCCGTAGTTGTATTCAGTATTTATACTTATTTATTCACAAT
GmaAffx.76350.1.A1_at	BE555004		0	No Homology to Known Proteins			GAGTGAGTATTATTAGGTTTGGTAACAAATAAAAAAAAGATTGTGATGGACATTGAAGACCTCTTAAATCAGGGAATAGTCTCGTGAATCATGTTCTCTAAGGTGTAAAATGGCTTGGTATAGCATGCTTTGAAATTCATCACTTTCGGTCATGTATATCGACAGATCTCTCATTCATGTCTTGACATAGTTCTGTAATTTTTACTCCATTGAGGGAAGCATCTTAAGAAATGTGTTGGATCGTTGATACCCATGAGAAAGTGGGTGACTGAATGTATACTTGAGTGTGATATCTGTAGTACTTTGGTTTTTGTTATCAACTTTTGCTTGG
GmaAffx.76350.1.A1_s_at	BE555004		0	No Homology to Known Proteins			GTATAGCATGCTTTGAAATTCATCACTTTCGGTCATGTATATCGACAGATCTCTCATTCATGTCTTGACATAGTTCTGTAATTTTTACTCCATTGAGGGAAGCATCTTAAGAAATGTGTTGGATCGTTGATACCCATGAGAAAGTGGGTGACTGAATGTATACTTGAG
GmaAffx.78636.1.S1_at	BQ627652		0	No Homology to Known Proteins			GGTGGCTGCTAAGTGCATGGAATATGAGACAATTAATTAAACCTGCAGCATGCATGTGTTGGAGTTCCCTTTCTCAAGGTAGAAATAATAANTCTAGTGGAGATGTAAACTACCATATTTTTAAGTTTGGTGGGTCAGCATAATAGTGATAATACTTCCCTTACTTTTGCTTCTTAGTAATTTACTAGAACGTGGGTTTCTCGGATGTATTTGATGANATATGAGAGCGGTGAATGGTGTATTTTTTAT
GmaAffx.78433.1.S1_s_at	BM954579		0	No Homology to Known Proteins			AAATATGTGTCTGTACTTTTCTCTATTACTCGTGTGGAAAACTGTGGACAATTAAACGTTCTATATGCAAGTGACTTTTTTCTTATGTGATTTACTTCCACAACTCTTGGTTAATTAGAAAGAGGATATATGTGTGCTTTATCAGGAG
GmaAffx.78601.1.S1_s_at	BQ627607		0	No Homology to Known Proteins			ATTCCTTGAGTGTTCCTTTTCTGTCTTGTGCATCCTTAGTCATTTCTCATTTTACTCTTCATAATTAAGTACTCATCTTCTCTTGTTTA
GmaAffx.79047.1.S1_s_at	BU763803		0	No Homology to Known Proteins			ATACTATCATCGTTTCTCGATTCTCATTGCTGACGCAGTGGAACATTATATACTATATGTTTGTGTATATTTAACCGAGTTCGGTTGGCACTTGTTATGTGGACTCCCCCTTTGAGGG
GmaAffx.80234.1.S1_s_at	AW396690		0	No Homology to Known Proteins			TACTCAAATGTTGATGGGTTATTTAGTTACTCATTGTTGATGTACTACCCCTATCTTGTATTAGTAAAAGAGAAAATTTGTGATGTGTACTCACCGTCGGTGGATTACCTCGTAGTAGTAA
GmaAffx.75881.1.S1_at	AW598783		0	No Homology to Known Proteins			GACTGTCTTTTTTAAAGATCATCTTGTAGTTGTAACATTAAATAGTAAGTTGCACTGTTGAGTTACCTATCCACACATTATGATTCACAAGGTCTTATGAATGCTAGTTTTGCGAGTTTGTATTCCACATGACTAAAA
GmaAffx.74170.1.S1_at	BQ611779		0	No Homology to Known Proteins			ATGAGCATGAGCCAAGCAGCTCGCCATCTTATGCAAACAACTGCACCAAATTTGCCTGGCATTCCCACTTTGCCTAAACCAACATTTCCACCTTTGCCTTCACTTCCAACACTGCCTCAGGGCAATGTTCCACCCTTGGCTACAATCCCAACACTGCCACAACCTACCCTACCATCTTTGCCTACCACTTTGCCTCCACTTCCCAGCAGCATCCCTACCATTCCTTCATTGCCCAACATTCCCTCAATCCCCACATTCACAATTCCAACCACTATGCCCTCCATTCCTTTCCTATCTCCACCACCTTCCACCTCTAGCCCTTAAAAATACCTTTAATTAATTCCTCTGACTTTGGTATCTCTGCCAAGTT
GmaAffx.74274.1.S1_at	BQ785389		0	No Homology to Known Proteins			TGTATGAACGTGTGTCTATGAGCTTCTCAATTTCGCTTCTCTCTCATTGATGTCTTTCTTAGACAGAAAACGTAGAAAAATAAGCAGGAGAGTTAAATGTGTAATAATCAACTTGGAGGTAATGTTTCTCAGTTAGTTACCTGTGTGTGTCCTTATGCCTTTCTGT
GmaAffx.75093.1.A1_s_at	CD407666		0	No Homology to Known Proteins			TTCTATCATTTGTGGCTATTTATTGTGCCTGCAGATTTATCTGTCATAAAGTAGGTAAATATCTGACATGGTGAAATATTTAGAGTTTTTAGTTCTAGTCTCAAGGATCTTAAATAATTTTAAACTTGCAAGCTTGTGGAGAAAAGGTAGCTTGTTATAGTTGTATTTATTGTTTTTACATTAGAGACCATACCTTCAAGTCGGATGTTAATTACATTCCTAGCAATCGAATATTGTCC
GmaAffx.7517.1.S1_s_at	AW733377		0	No Homology to Known Proteins			GAAATTTTCTCTATCCTTACCATTAATTGGTAGTTTTTTAAGTAGAGACGTTCATGTGTCTCTCCCGTGTTGGCTAGACTTTTAGCACTTATTATTTTACCACCAAAAAAAATCTCCTTTAGAATATTGTATAA
GmaAffx.75412.1.S1_at	AW100606		0	No Homology to Known Proteins			TCTCTTTTCCCATGTCAGGATCCTTTAATTATGCTCCCAAATTTGGTGGCGGTGAATCAAGTTCTGACAATCTGTAGTGACAATTTATAA
GmaAffx.74624.1.S1_at	BU926261		0	No Homology to Known Proteins			AGCATATGGGATTTCAGTCTTTAAAGCCCGCTTTTACGTGACATCCATCATTGTAATGATTCCCATAAAAAACCCTCATTCTAAAAGTCCTAGAAAGAAAGCATGTGA
[truncated: 1,759 more rows]
